# Supplementary material
Source: publisher figshare collection journal article supplement (https://acs.figshare.com/ndownloader/files/22494656)

# checkCIF/PLATON report

You have not supplied any structure factors. As a result the full set of tests cannot be run.

THIS REPORT IS FOR GUIDANCE ONLY. IF USED AS PART OF A REVIEW PROCEDURE FOR PUBLICATION, IT SHOULD NOT REPLACE THE EXPERTISE OF AN EXPERIENCED CRYSTALLOGRAPHIC REFEREE.

No syntax errors found.      CIF dictionary      Interpreting this report

## Datablock: 1p

---

|                 |                                                                 |                                 |
|-----------------|-----------------------------------------------------------------|---------------------------------|
| Bond precision: | C-C = 0.0198 A                                                  | Wavelength=0.71073              |
| Cell:           | a=24.282(3)                                                     | b=12.4370(14)      c=17.961(2)  |
|                 | alpha=90                                                        | beta=112.100(4)      gamma=90   |
| Temperature:    | 109 K                                                           |                                 |
|                 | Calculated                                                      | Reported                        |
| Volume          | 5025.6(10)                                                      | 5025.5(10)                      |
| Space group     | C 2/c                                                           | C 1 2/c 1                       |
| Hall group      | -C 2yc                                                          | -C 2yc                          |
| Moiety formula  | C22 H15.95 Cu I N3 O,<br>0.561(C Cl4), 0.44(C Cl3),<br>0.44(Cl) | C22 H15.95 Cu I N3 O, Cl<br>Cl4 |
| Sum formula     | C23 H15.95 Cl4 Cu I N3 O                                        | C23 H15.95 Cl4 Cu I N3 O        |
| Mr              | 682.58                                                          | 682.57                          |
| Dx, g cm-3      | 1.804                                                           | 1.804                           |
| Z               | 8                                                               | 8                               |
| Mu (mm-1)       | 2.545                                                           | 2.545                           |
| F000            | 2663.6                                                          | 2664.0                          |
| F000'           | 2667.72                                                         |                                 |
| h,k,lmax        | 29,15,21                                                        | 29,15,21                        |
| Nref            | 4662                                                            | 4644                            |
| Tmin,Tmax       | 0.262,0.318                                                     | 0.474,0.745                     |
| Tmin'           | 0.221                                                           |                                 |

Correction method= # Reported T Limits: Tmin=0.474 Tmax=0.745  
AbsCorr = MULTI-SCAN

Data completeness= 0.996      Theta(max)= 25.476

R(reflections)= 0.0983( 4087)      wR2(reflections)= 0.2385( 4644)

S = 1.266      Npar= 348

---

The following ALERTS were generated. Each ALERT has the format

**test-name\_ALERT\_alert-type\_alert-level.**

Click on the hyperlinks for more details of the test.

### ● Alert level C

|                   |                                                |         |       |
|-------------------|------------------------------------------------|---------|-------|
| PLAT241_ALERT_2_C | High 'MainMol' Ueq as Compared to Neighbors of | C18     | Check |
| PLAT260_ALERT_2_C | Large Average Ueq of Residue Including C11A    | 0.123   | Check |
| PLAT260_ALERT_2_C | Large Average Ueq of Residue Including C14A    | 0.113   | Check |
| PLAT342_ALERT_3_C | Low Bond Precision on C-C Bonds .....          | 0.01976 | Ang.  |

### ● Alert level G

|                   |                                                  |        |        |
|-------------------|--------------------------------------------------|--------|--------|
| PLAT002_ALERT_2_G | Number of Distance or Angle Restraints on AtSite | 2      | Note   |
| PLAT004_ALERT_5_G | Polymeric Structure Found with Maximum Dimension | 2      | Info   |
| PLAT012_ALERT_1_G | N.O.K. _shelx_res_checksum Found in CIF .....    | Please | Check  |
| PLAT042_ALERT_1_G | Calc. and Reported MoietyFormula Strings Differ  | Please | Check  |
| PLAT068_ALERT_1_G | Reported F000 Differs from Calcd (or Missing)... | Please | Check  |
| PLAT083_ALERT_2_G | SHELXL Second Parameter in WGHT Unusually Large  | 412.99 | Why ?  |
| PLAT171_ALERT_4_G | The CIF-Embedded .res File Contains EADP Records | 7      | Report |
| PLAT172_ALERT_4_G | The CIF-Embedded .res File Contains DFIX Records | 1      | Report |
| PLAT300_ALERT_4_G | Atom Site Occupancy of O1B Constrained at        | 0.5265 | Check  |
| PLAT300_ALERT_4_G | Atom Site Occupancy of O1A Constrained at        | 0.4735 | Check  |
| PLAT300_ALERT_4_G | Atom Site Occupancy of C19B Constrained at       | 0.5265 | Check  |
| PLAT300_ALERT_4_G | Atom Site Occupancy of C20B Constrained at       | 0.5265 | Check  |
| PLAT300_ALERT_4_G | Atom Site Occupancy of C21B Constrained at       | 0.5265 | Check  |
| PLAT300_ALERT_4_G | Atom Site Occupancy of C22B Constrained at       | 0.5265 | Check  |
| PLAT300_ALERT_4_G | Atom Site Occupancy of C19A Constrained at       | 0.4735 | Check  |
| PLAT300_ALERT_4_G | Atom Site Occupancy of C20A Constrained at       | 0.4735 | Check  |
| PLAT300_ALERT_4_G | Atom Site Occupancy of C21A Constrained at       | 0.4735 | Check  |
| PLAT300_ALERT_4_G | Atom Site Occupancy of C22A Constrained at       | 0.4735 | Check  |
| PLAT300_ALERT_4_G | Atom Site Occupancy of H19B Constrained at       | 0.5265 | Check  |
| PLAT300_ALERT_4_G | Atom Site Occupancy of H21B Constrained at       | 0.5265 | Check  |
| PLAT300_ALERT_4_G | Atom Site Occupancy of H22D Constrained at       | 0.5265 | Check  |
| PLAT300_ALERT_4_G | Atom Site Occupancy of H22E Constrained at       | 0.5265 | Check  |
| PLAT300_ALERT_4_G | Atom Site Occupancy of H22F Constrained at       | 0.5265 | Check  |
| PLAT300_ALERT_4_G | Atom Site Occupancy of H17 Constrained at        | 0.4735 | Check  |
| PLAT300_ALERT_4_G | Atom Site Occupancy of H18 Constrained at        | 0.4735 | Check  |
| PLAT300_ALERT_4_G | Atom Site Occupancy of H19A Constrained at       | 0.4735 | Check  |
| PLAT300_ALERT_4_G | Atom Site Occupancy of H21A Constrained at       | 0.4735 | Check  |
| PLAT300_ALERT_4_G | Atom Site Occupancy of H22A Constrained at       | 0.4735 | Check  |
| PLAT300_ALERT_4_G | Atom Site Occupancy of H22B Constrained at       | 0.4735 | Check  |
| PLAT300_ALERT_4_G | Atom Site Occupancy of H22C Constrained at       | 0.4735 | Check  |
| PLAT300_ALERT_4_G | Atom Site Occupancy of Cl1B Constrained at       | 0.5605 | Check  |
| PLAT300_ALERT_4_G | Atom Site Occupancy of Cl2B Constrained at       | 0.5605 | Check  |
| PLAT300_ALERT_4_G | Atom Site Occupancy of Cl3B Constrained at       | 0.5605 | Check  |
| PLAT300_ALERT_4_G | Atom Site Occupancy of Cl4B Constrained at       | 0.5605 | Check  |
| PLAT300_ALERT_4_G | Atom Site Occupancy of C0AA Constrained at       | 0.5605 | Check  |
| PLAT300_ALERT_4_G | Atom Site Occupancy of Cl1A Constrained at       | 0.4395 | Check  |
| PLAT300_ALERT_4_G | Atom Site Occupancy of Cl2A Constrained at       | 0.4395 | Check  |
| PLAT300_ALERT_4_G | Atom Site Occupancy of Cl3A Constrained at       | 0.4395 | Check  |
| PLAT300_ALERT_4_G | Atom Site Occupancy of C23A Constrained at       | 0.4395 | Check  |
| PLAT300_ALERT_4_G | Atom Site Occupancy of Cl4A Constrained at       | 0.4395 | Check  |
| PLAT301_ALERT_3_G | Main Residue Disorder .....(Resd 1 )             | 18%    | Note   |
| PLAT302_ALERT_4_G | Anion/Solvent/Minor-Residue Disorder (Resd 2 )   | 100%   | Note   |
| PLAT302_ALERT_4_G | Anion/Solvent/Minor-Residue Disorder (Resd 3 )   | 100%   | Note   |
| PLAT302_ALERT_4_G | Anion/Solvent/Minor-Residue Disorder (Resd 4 )   | 100%   | Note   |
| PLAT434_ALERT_2_G | Short Inter HL..HL Contact I001 ..C14A           | 3.46   | Ang.   |
|                   | 1-x,2-y,1-z =                                    | 5_676  | Check  |
| PLAT434_ALERT_2_G | Short Inter HL..HL Contact I001 ..C12B           | 3.53   | Ang.   |
|                   | x,1+y,z =                                        | 1_565  | Check  |

|                   |                                                  |   |      |
|-------------------|--------------------------------------------------|---|------|
| PLAT720_ALERT_4_G | Number of Unusual/Non-Standard Labels .....      | 3 | Note |
| PLAT811_ALERT_5_G | No ADDSYM Analysis: Too Many Excluded Atoms .... | ! | Info |
| PLAT860_ALERT_3_G | Number of Least-Squares Restraints .....         | 1 | Note |
| PLAT933_ALERT_2_G | Number of OMIT Records in Embedded .res File ... | 1 | Note |

---

0 **ALERT level A** = Most likely a serious problem - resolve or explain  
 0 **ALERT level B** = A potentially serious problem, consider carefully  
 4 **ALERT level C** = Check. Ensure it is not caused by an omission or oversight  
 50 **ALERT level G** = General information/check it is not something unexpected

3 ALERT type 1 CIF construction/syntax error, inconsistent or missing data  
 8 ALERT type 2 Indicator that the structure model may be wrong or deficient  
 3 ALERT type 3 Indicator that the structure quality may be low  
 38 ALERT type 4 Improvement, methodology, query or suggestion  
 2 ALERT type 5 Informative message, check

---

It is advisable to attempt to resolve as many as possible of the alerts in all categories. Often the minor alerts point to easily fixed oversights, errors and omissions in your CIF or refinement strategy, so attention to these fine details can be worthwhile. In order to resolve some of the more serious problems it may be necessary to carry out additional measurements or structure refinements. However, the purpose of your study may justify the reported deviations and the more serious of these should normally be commented upon in the discussion or experimental section of a paper or in the "special\_details" fields of the CIF. checkCIF was carefully designed to identify outliers and unusual parameters, but every test has its limitations and alerts that are not important in a particular case may appear. Conversely, the absence of alerts does not guarantee there are no aspects of the results needing attention. It is up to the individual to critically assess their own results and, if necessary, seek expert advice.

### Publication of your CIF in IUCr journals

A basic structural check has been run on your CIF. These basic checks will be run on all CIFs submitted for publication in IUCr journals (*Acta Crystallographica*, *Journal of Applied Crystallography*, *Journal of Synchrotron Radiation*); however, if you intend to submit to *Acta Crystallographica Section C* or *E* or *IUCrData*, you should make sure that full publication checks are run on the final version of your CIF prior to submission.

### Publication of your CIF in other journals

Please refer to the *Notes for Authors* of the relevant journal for any special instructions relating to CIF submission.

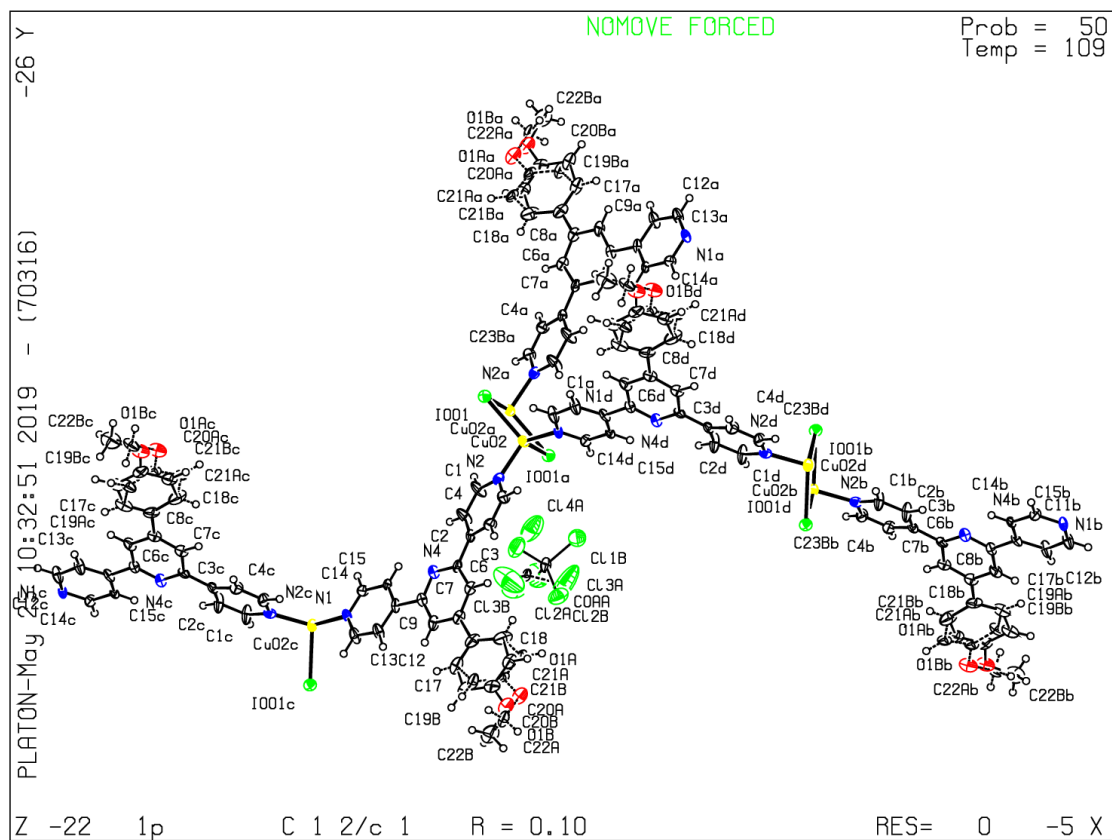

Supplement: Supplementary file 1 [file 22494656 › CIF/1P checkcif.pdf]
