# Supplementary material
Source: publisher figshare collection journal article supplement (https://acs.figshare.com/ndownloader/files/22494656)

# checkCIF/PLATON report

You have not supplied any structure factors. As a result the full set of tests cannot be run.

THIS REPORT IS FOR GUIDANCE ONLY. IF USED AS PART OF A REVIEW PROCEDURE FOR PUBLICATION, IT SHOULD NOT REPLACE THE EXPERTISE OF AN EXPERIENCED CRYSTALLOGRAPHIC REFEREE.

No syntax errors found.      CIF dictionary      Interpreting this report

## Datablock: 1r

---

|                 |                                         |                                 |
|-----------------|-----------------------------------------|---------------------------------|
| Bond precision: | C-C = 0.0175 Å                          | Wavelength=0.71073              |
| Cell:           | a=24.3244(9)                            | b=12.2780(5)      c=17.7756(6)  |
|                 | alpha=90                                | beta=112.772(2)      gamma=90   |
| Temperature:    | 100 K                                   |                                 |
|                 | Calculated                              | Reported                        |
| Volume          | 4895.0(3)                               | 4895.0(3)                       |
| Space group     | C 2/c                                   | C 1 2/c 1                       |
| Hall group      | -C 2yc                                  | -C 2yc                          |
| Moiety formula  | 4(C22 H17 Cu I N3 O), C4 Br, 4(C H2 Br) | C22 H17 Cu I N3 O, C2 H2 Br1.25 |
| Sum formula     | C96 H76 Br5 Cu4 I4 N12 O4               | C24 H19 Br1.25 Cu I N3 O        |
| Mr              | 2622.99                                 | 655.75                          |
| Dx,g cm-3       | 1.780                                   | 1.780                           |
| Z               | 2                                       | 8                               |
| Mu (mm-1)       | 4.215                                   | 4.215                           |
| F000            | 2542.0                                  | 2542.0                          |
| F000'           | 2538.75                                 |                                 |
| h,k,lmax        | 29,14,21                                | 29,14,21                        |
| Nref            | 4543                                    | 4524                            |
| Tmin,Tmax       | 0.294,0.430                             | 0.415,0.745                     |
| Tmin'           | 0.220                                   |                                 |

Correction method= # Reported T Limits: Tmin=0.415 Tmax=0.745  
AbsCorr = MULTI-SCAN

Data completeness= 0.996      Theta(max)= 25.448

R(reflections)= 0.1034( 3197)      wR2(reflections)= 0.2998( 4524)

S = 1.035      Npar= 276

---

The following ALERTS were generated. Each ALERT has the format  
**test-name\_ALERT\_alert-type\_alert-level**.  
Click on the hyperlinks for more details of the test.

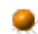

#### Alert level B

PLAT366\_ALERT\_2\_B Short? C(sp?)-C(sp?) Bond ClAA - ClAA\_e . 0.71 Ang.

**Author Response: The dibromoethen molecule were present around a symmetry element due to symmerty it is growing to the other side and this alert is due to growing in the structure followed by symmetry.**

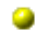

#### Alert level C

PLAT084\_ALERT\_3\_C High wR2 Value (i.e. > 0.25) ..... 0.30 Report  
PLAT202\_ALERT\_3\_C Isotropic non-H Atoms in Anion/Solvent ..... 2 Check  
ClAA C0AA  
PLAT213\_ALERT\_2\_C Atom C22 has ADP max/min Ratio .... 3.2 prolat  
PLAT220\_ALERT\_2\_C Non-Solvent Resd 1 C Ueq(max)/Ueq(min) Range 3.6 Ratio  
PLAT260\_ALERT\_2\_C Large Average Ueq of Residue Including Br2 0.117 Check  
PLAT260\_ALERT\_2\_C Large Average Ueq of Residue Including Br1 0.296 Check  
PLAT329\_ALERT\_4\_C Carbon Atom Hybridisation Unclear for ..... C0AA Check  
PLAT342\_ALERT\_3\_C Low Bond Precision on C-C Bonds ..... 0.01745 Ang.

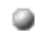

#### Alert level G

PLAT004\_ALERT\_5\_G Polymeric Structure Found with Maximum Dimension 2 Info  
PLAT012\_ALERT\_1\_G N.O.K. \_shelx\_res\_checksum Found in CIF ..... Please Check  
PLAT042\_ALERT\_1\_G Calc. and Reported MoietyFormula Strings Differ Please Check  
PLAT045\_ALERT\_1\_G Calculated and Reported Z Differ by a Factor ... 0.25 Check  
PLAT072\_ALERT\_2\_G SHELXL First Parameter in WGHT Unusually Large 0.15 Report  
PLAT083\_ALERT\_2\_G SHELXL Second Parameter in WGHT Unusually Large 281.27 Why ?  
PLAT128\_ALERT\_4\_G Alternate Setting for Input Space Group C2/c I2/a Note  
PLAT232\_ALERT\_2\_G Hirshfeld Test Diff (M-X) I001 --Cu02 . 13.2 s.u.  
PLAT232\_ALERT\_2\_G Hirshfeld Test Diff (M-X) I001 --Cu02\_a . 8.2 s.u.  
PLAT300\_ALERT\_4\_G Atom Site Occupancy of Br2 Constrained at 0.5 Check  
PLAT302\_ALERT\_4\_G Anion/Solvent/Minor-Residue Disorder (Resd 2 ) 33% Note  
PLAT344\_ALERT\_2\_G Unusual sp? Angle Range in Solvent/Ion for C0AA Check  
PLAT432\_ALERT\_2\_G Short Inter X...Y Contact C0AA ..ClAA 1.98 Ang.  
x,y,z = 1\_555 Check  
PLAT432\_ALERT\_2\_G Short Inter X...Y Contact C0AA ..ClAA 2.62 Ang.  
-x,y,1/2-z = 2\_555 Check  
PLAT720\_ALERT\_4\_G Number of Unusual/Non-Standard Labels ..... 10 Note  
PLAT773\_ALERT\_2\_G Check long C-C Bond in CIF: C0AA --ClAA 1.98 Ang.  
PLAT779\_ALERT\_4\_G Suspect or Irrelevant (Bond) Angle in CIF .... # 89 Check  
ClAA -BR2 -ClAA 2.000 1.555 1.555 18.90 Deg.  
PLAT933\_ALERT\_2\_G Number of OMIT Records in Embedded .res File ... 7 Note

- 0 **ALERT level A** = Most likely a serious problem - resolve or explain
- 1 **ALERT level B** = A potentially serious problem, consider carefully
- 8 **ALERT level C** = Check. Ensure it is not caused by an omission or oversight
- 18 **ALERT level G** = General information/check it is not something unexpected

3 ALERT type 1 CIF construction/syntax error, inconsistent or missing data

14 ALERT type 2 Indicator that the structure model may be wrong or deficient  
3 ALERT type 3 Indicator that the structure quality may be low  
6 ALERT type 4 Improvement, methodology, query or suggestion  
1 ALERT type 5 Informative message, check

---

It is advisable to attempt to resolve as many as possible of the alerts in all categories. Often the minor alerts point to easily fixed oversights, errors and omissions in your CIF or refinement strategy, so attention to these fine details can be worthwhile. In order to resolve some of the more serious problems it may be necessary to carry out additional measurements or structure refinements. However, the purpose of your study may justify the reported deviations and the more serious of these should normally be commented upon in the discussion or experimental section of a paper or in the "special\_details" fields of the CIF. checkCIF was carefully designed to identify outliers and unusual parameters, but every test has its limitations and alerts that are not important in a particular case may appear. Conversely, the absence of alerts does not guarantee there are no aspects of the results needing attention. It is up to the individual to critically assess their own results and, if necessary, seek expert advice.

### **Publication of your CIF in IUCr journals**

A basic structural check has been run on your CIF. These basic checks will be run on all CIFs submitted for publication in IUCr journals (*Acta Crystallographica*, *Journal of Applied Crystallography*, *Journal of Synchrotron Radiation*); however, if you intend to submit to *Acta Crystallographica Section C* or *E* or *IUCrData*, you should make sure that full publication checks are run on the final version of your CIF prior to submission.

### **Publication of your CIF in other journals**

Please refer to the *Notes for Authors* of the relevant journal for any special instructions relating to CIF submission.

---

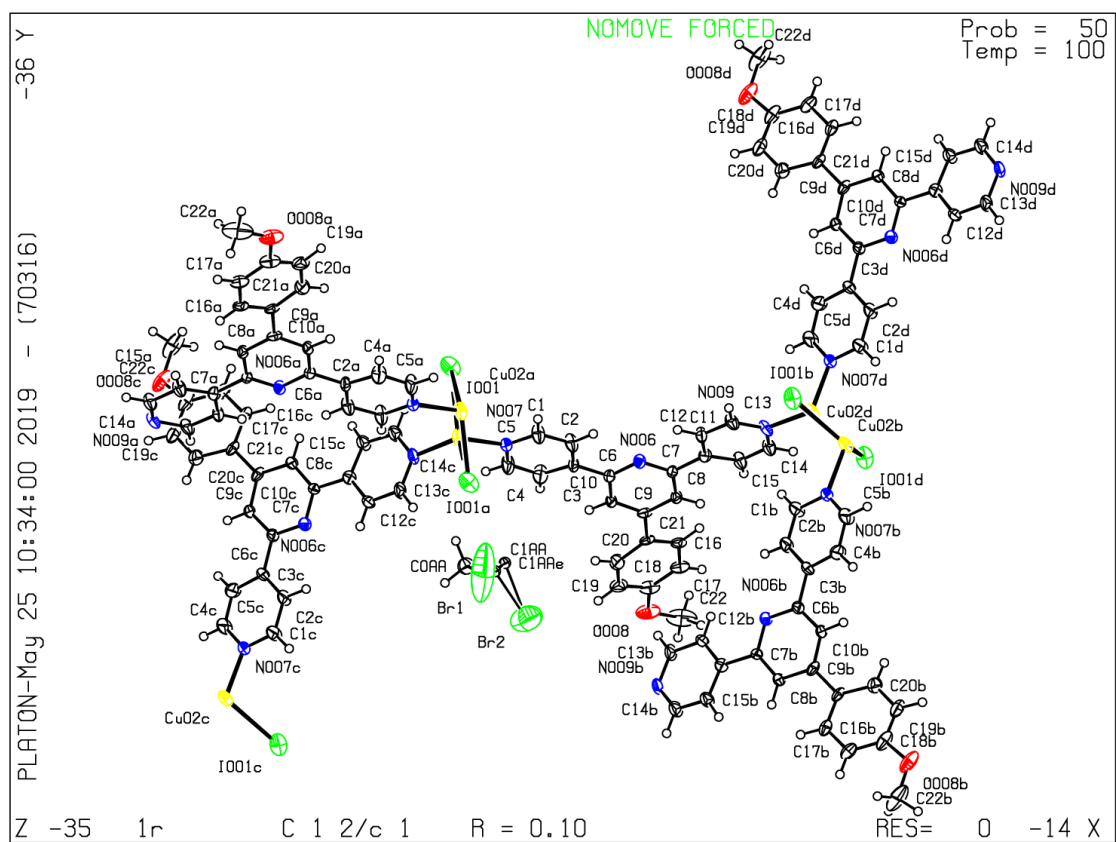

Supplement: Supplementary file 1 [file 22494656 › CIF/1R checkcif.pdf]
