# Supplementary material
Source: publisher figshare collection journal article supplement (https://acs.figshare.com/ndownloader/files/22494656)

# checkCIF/PLATON report

You have not supplied any structure factors. As a result the full set of tests cannot be run.

THIS REPORT IS FOR GUIDANCE ONLY. IF USED AS PART OF A REVIEW PROCEDURE FOR PUBLICATION, IT SHOULD NOT REPLACE THE EXPERTISE OF AN EXPERIENCED CRYSTALLOGRAPHIC REFEREE.

No syntax errors found.      CIF dictionary      Interpreting this report

## Datablock: 1v

---

|                 |                                  |                                |
|-----------------|----------------------------------|--------------------------------|
| Bond precision: | C-C = 0.0219 Å                   | Wavelength=0.71073             |
| Cell:           | a=23.9180(9)                     | b=12.7420(5)      c=17.8041(7) |
|                 | alpha=90                         | beta=112.848(2)      gamma=90  |
| Temperature:    | 100 K                            |                                |
|                 | Calculated                       | Reported                       |
| Volume          | 5000.3(3)                        | 5000.3(3)                      |
| Space group     | C 2/c                            | C 1 2/c 1                      |
| Hall group      | -C 2yc                           | -C 2yc                         |
| Moiety formula  | 2(C22 H17 Cu I N3 O), C12 H8 Cl3 | C22 H17 Cu I N3 O, C6 H4 Cl1.5 |
| Sum formula     | C56 H42 Cl3 Cu2 I2 N6 O2         | C28 H21 Cl1.50 Cu I N3 O       |
| Mr              | 1318.21                          | 659.09                         |
| Dx,g cm-3       | 1.751                            | 1.751                          |
| Z               | 4                                | 8                              |
| Mu (mm-1)       | 2.296                            | 2.296                          |
| F000            | 2604.0                           | 2604.0                         |
| F000'           | 2605.24                          |                                |
| h,k,lmax        | 28,15,21                         | 28,15,21                       |
| Nref            | 4713                             | 4660                           |
| Tmin,Tmax       | 0.396,0.502                      | 0.519,0.745                    |
| Tmin'           | 0.342                            |                                |

Correction method= # Reported T Limits: Tmin=0.519 Tmax=0.745  
AbsCorr = MULTI-SCAN

Data completeness= 0.989      Theta(max)= 25.579

R(reflections)= 0.0812( 3646)      wR2(reflections)= 0.2560( 4660)

S = 1.035      Npar= 287

---

The following ALERTS were generated. Each ALERT has the format

**test-name\_ALERT\_alert-type\_alert-level.**

Click on the hyperlinks for more details of the test.

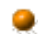

#### Alert level B

PLAT342\_ALERT\_3\_B Low Bond Precision on C-C Bonds ..... 0.02193 Ang.

**Author Response: This alert is coming due to poor data quality.**

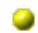

#### Alert level C

PLAT084\_ALERT\_3\_C High wR2 Value (i.e. > 0.25) ..... 0.26 Report  
PLAT202\_ALERT\_3\_C Isotropic non-H Atoms in Anion/Solvent ..... 1 Check  
C11  
PLAT242\_ALERT\_2\_C Low 'MainMol' Ueq as Compared to Neighbors of C24 Check  
PLAT260\_ALERT\_2\_C Large Average Ueq of Residue Including C11 0.248 Check  
PLAT336\_ALERT\_2\_C Long Bond Distance for ..... C24 -C11 1.940 Ang.

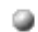

#### Alert level G

PLAT003\_ALERT\_2\_G Number of Uiso or Uij Restrained non-H Atoms ... 7 Report  
PLAT004\_ALERT\_5\_G Polymeric Structure Found with Maximum Dimension 2 Info  
PLAT012\_ALERT\_1\_G N.O.K. \_shelx\_res\_checksum Found in CIF ..... Please Check  
PLAT042\_ALERT\_1\_G Calc. and Reported MoietyFormula Strings Differ Please Check  
PLAT045\_ALERT\_1\_G Calculated and Reported Z Differ by a Factor ... 0.50 Check  
PLAT072\_ALERT\_2\_G SHELXL First Parameter in WGHT Unusually Large 0.15 Report  
PLAT083\_ALERT\_2\_G SHELXL Second Parameter in WGHT Unusually Large 101.03 Why ?  
PLAT128\_ALERT\_4\_G Alternate Setting for Input Space Group C2/c I2/a Note  
PLAT171\_ALERT\_4\_G The CIF-Embedded .res File Contains EADP Records 3 Report  
PLAT177\_ALERT\_4\_G The CIF-Embedded .res File Contains DELU Records 1 Report  
PLAT178\_ALERT\_4\_G The CIF-Embedded .res File Contains SIMU Records 1 Report  
PLAT187\_ALERT\_4\_G The CIF-Embedded .res File Contains RIGU Records 1 Report  
PLAT720\_ALERT\_4\_G Number of Unusual/Non-Standard Labels ..... 3 Note  
PLAT860\_ALERT\_3\_G Number of Least-Squares Restraints ..... 21 Note

0 **ALERT level A** = Most likely a serious problem - resolve or explain  
1 **ALERT level B** = A potentially serious problem, consider carefully  
5 **ALERT level C** = Check. Ensure it is not caused by an omission or oversight  
14 **ALERT level G** = General information/check it is not something unexpected

3 ALERT type 1 CIF construction/syntax error, inconsistent or missing data  
6 ALERT type 2 Indicator that the structure model may be wrong or deficient  
4 ALERT type 3 Indicator that the structure quality may be low  
6 ALERT type 4 Improvement, methodology, query or suggestion  
1 ALERT type 5 Informative message, check

It is advisable to attempt to resolve as many as possible of the alerts in all categories. Often the minor alerts point to easily fixed oversights, errors and omissions in your CIF or refinement strategy, so attention to these fine details can be worthwhile. In order to resolve some of the more serious problems it may be necessary to carry out additional measurements or structure refinements. However, the purpose of your study may justify the reported deviations and the more serious of these should normally be commented upon in the discussion or experimental section of a paper or in the "special\_details" fields of the CIF. checkCIF was carefully designed to identify outliers and unusual parameters, but every test has its limitations and alerts that are not important in a particular case may appear. Conversely, the absence of alerts does not guarantee there are no aspects of the results needing attention. It is up to the individual to critically assess their own results and, if necessary, seek expert advice.

### **Publication of your CIF in IUCr journals**

A basic structural check has been run on your CIF. These basic checks will be run on all CIFs submitted for publication in IUCr journals (*Acta Crystallographica*, *Journal of Applied Crystallography*, *Journal of Synchrotron Radiation*); however, if you intend to submit to *Acta Crystallographica Section C* or *E* or *IUCrData*, you should make sure that full publication checks are run on the final version of your CIF prior to submission.

### **Publication of your CIF in other journals**

Please refer to the *Notes for Authors* of the relevant journal for any special instructions relating to CIF submission.

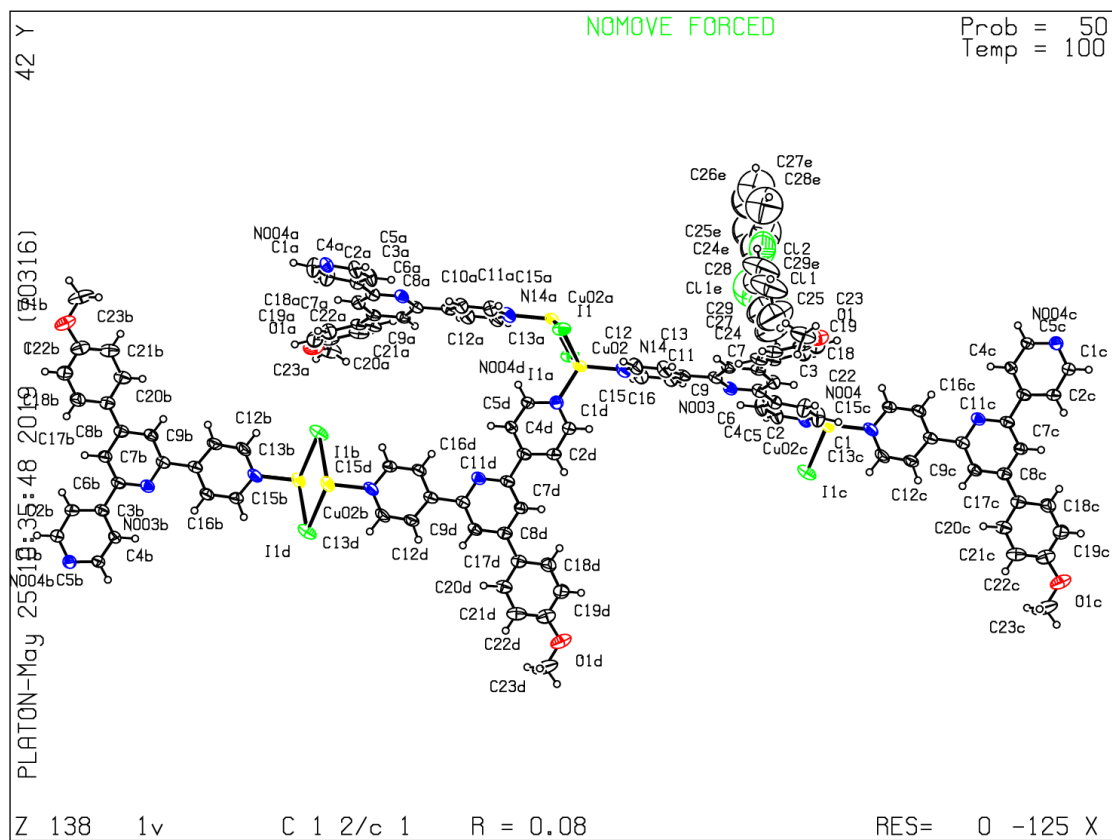

Supplement: Supplementary file 1 [file 22494656 › CIF/1V checkcif.pdf]
