# Supplementary material
Source: publisher figshare collection journal article supplement (https://acs.figshare.com/ndownloader/files/22494656)

# checkCIF/PLATON report

You have not supplied any structure factors. As a result the full set of tests cannot be run.

THIS REPORT IS FOR GUIDANCE ONLY. IF USED AS PART OF A REVIEW PROCEDURE FOR PUBLICATION, IT SHOULD NOT REPLACE THE EXPERTISE OF AN EXPERIENCED CRYSTALLOGRAPHIC REFEREE.

No syntax errors found.      CIF dictionary      Interpreting this report

## Datablock: 1z

---

|                 |                      |                               |
|-----------------|----------------------|-------------------------------|
| Bond precision: | C-C = 0.0187 Å       | Wavelength=0.71073            |
| Cell:           | a=24.184(10)         | b=12.642(6)      c=17.903(8)  |
|                 | alpha=90             | beta=113.189(4)      gamma=90 |
| Temperature:    | 100 K                |                               |
|                 | Calculated           | Reported                      |
| Volume          | 5031(4)              | 5031(4)                       |
| Space group     | C 2/c                | C 1 2/c 1                     |
| Hall group      | -C 2yc               | -C 2yc                        |
| Moiety formula  | C22 H17 Cu I N3 O, O | C22 H17 Cu I N3 O, O          |
| Sum formula     | C22 H17 Cu I N3 O2   | C22 H17 Cu I N3 O2            |
| Mr              | 545.84               | 545.82                        |
| Dx,g cm-3       | 1.441                | 1.441                         |
| Z               | 8                    | 8                             |
| Mu (mm-1)       | 2.114                | 2.114                         |
| F000            | 2144.0               | 2144.0                        |
| F000'           | 2143.42              |                               |
| h,k,lmax        | 29,15,21             | 29,15,21                      |
| Nref            | 4724                 | 4667                          |
| Tmin,Tmax       | 0.621,0.655          | 0.582,0.745                   |
| Tmin'           | 0.609                |                               |

Correction method= # Reported T Limits: Tmin=0.582 Tmax=0.745  
AbsCorr = MULTI-SCAN

Data completeness= 0.988      Theta(max)= 25.566

R(reflections)= 0.0729( 2052)      wR2(reflections)= 0.2534( 4667)

S = 1.023      Npar= 272

---

The following ALERTS were generated. Each ALERT has the format  
**test-name\_ALERT\_alert-type\_alert-level**.  
Click on the hyperlinks for more details of the test.

---

### Alert level A

PLAT601\_ALERT\_2\_A Structure Contains Solvent Accessible VOIDS of . 391 Ang\*\*3

**Author Response: The structure is porous in nature and in MOF structure the solvent accessible void are observed very frequently, in this structure the solvent gets removed when we expose our crystal in the air only few disorderd water molecule were modeled according to the Q peaks, we have CHN and TGA which strongly supports the presence of water in the crystal void rest is empty in nature.**

---

### Alert level C

RINTA01\_ALERT\_3\_C The value of Rint is greater than 0.12  
Rint given 0.131  
PLAT020\_ALERT\_3\_C The Value of Rint is Greater Than 0.12 ..... 0.131 Report  
PLAT026\_ALERT\_3\_C Ratio Observed / Unique Reflections (too) Low .. 44% Check  
PLAT241\_ALERT\_2\_C High MainMol Ueq as Compared to Neighbors of C4 Check  
PLAT260\_ALERT\_2\_C Large Average Ueq of Residue Including O2A 0.210 Check  
PLAT260\_ALERT\_2\_C Large Average Ueq of Residue Including O2B 0.154 Check  
PLAT342\_ALERT\_3\_C Low Bond Precision on C-C Bonds ..... 0.01867 Ang.

---

### Alert level G

PLAT004\_ALERT\_5\_G Polymeric Structure Found with Maximum Dimension 2 Info  
PLAT012\_ALERT\_1\_G N.O.K. \_shelx\_res\_checksum Found in CIF ..... Please Check  
PLAT072\_ALERT\_2\_G SHELXL First Parameter in WGHT Unusually Large 0.13 Report  
PLAT128\_ALERT\_4\_G Alternate Setting for Input Space Group C2/c I2/a Note  
PLAT232\_ALERT\_2\_G Hirshfeld Test Diff (M-X) I1 --Cul . 5.3 s.u.  
PLAT232\_ALERT\_2\_G Hirshfeld Test Diff (M-X) I1 --Cul\_a . 6.8 s.u.  
PLAT300\_ALERT\_4\_G Atom Site Occupancy of O2A Constrained at 0.6733 Check  
PLAT300\_ALERT\_4\_G Atom Site Occupancy of O2B Constrained at 0.3267 Check  
PLAT302\_ALERT\_4\_G Anion/Solvent/Minor-Residue Disorder (Resd 2 ) 100% Note  
PLAT302\_ALERT\_4\_G Anion/Solvent/Minor-Residue Disorder (Resd 3 ) 100% Note  
PLAT311\_ALERT\_2\_G Isolated Disordered Oxygen Atom (No H's ?) ..... O2A Check  
PLAT311\_ALERT\_2\_G Isolated Disordered Oxygen Atom (No H's ?) ..... O2B Check  
PLAT883\_ALERT\_1\_G No Info/Value for \_atom\_sites\_solution\_primary . Please Do !

---

1 **ALERT level A** = Most likely a serious problem - resolve or explain  
0 **ALERT level B** = A potentially serious problem, consider carefully  
7 **ALERT level C** = Check. Ensure it is not caused by an omission or oversight  
13 **ALERT level G** = General information/check it is not something unexpected

2 ALERT type 1 CIF construction/syntax error, inconsistent or missing data  
9 ALERT type 2 Indicator that the structure model may be wrong or deficient  
4 ALERT type 3 Indicator that the structure quality may be low  
5 ALERT type 4 Improvement, methodology, query or suggestion  
1 ALERT type 5 Informative message, check

---

It is advisable to attempt to resolve as many as possible of the alerts in all categories. Often the minor alerts point to easily fixed oversights, errors and omissions in your CIF or refinement strategy, so attention to these fine details can be worthwhile. In order to resolve some of the more serious problems it may be necessary to carry out additional measurements or structure refinements. However, the purpose of your study may justify the reported deviations and the more serious of these should normally be commented upon in the discussion or experimental section of a paper or in the "special\_details" fields of the CIF. checkCIF was carefully designed to identify outliers and unusual parameters, but every test has its limitations and alerts that are not important in a particular case may appear. Conversely, the absence of alerts does not guarantee there are no aspects of the results needing attention. It is up to the individual to critically assess their own results and, if necessary, seek expert advice.

### **Publication of your CIF in IUCr journals**

A basic structural check has been run on your CIF. These basic checks will be run on all CIFs submitted for publication in IUCr journals (*Acta Crystallographica*, *Journal of Applied Crystallography*, *Journal of Synchrotron Radiation*); however, if you intend to submit to *Acta Crystallographica Section C* or *E* or *IUCrData*, you should make sure that full publication checks are run on the final version of your CIF prior to submission.

### **Publication of your CIF in other journals**

Please refer to the *Notes for Authors* of the relevant journal for any special instructions relating to CIF submission.

---

**PLATON version of 22/12/2019; check.def file version of 13/12/2019**

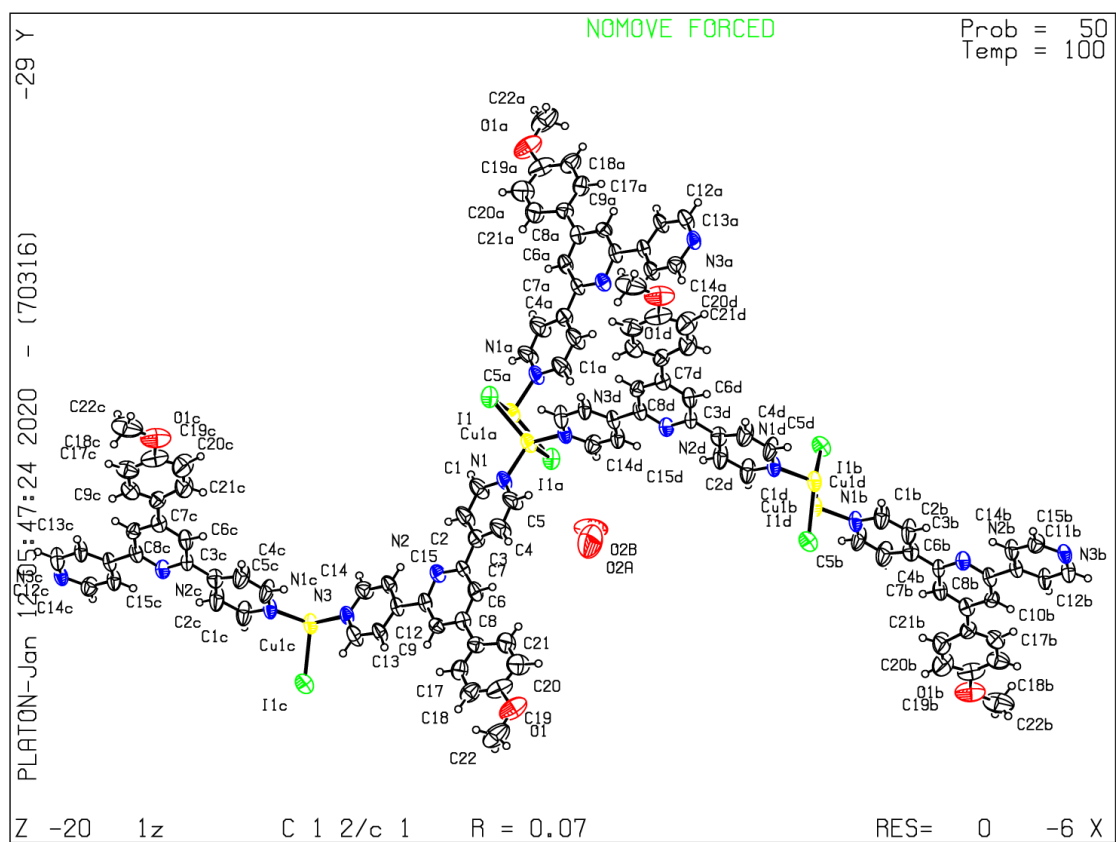

Supplement: Supplementary file 14 [file 22494656]
