# Supplementary material
Source: publisher figshare collection journal article supplement (https://acs.figshare.com/ndownloader/files/22494656)
Supplement: Supplementary file 1 [file 22494656]

Archive with 26 entries (26 files):
- CIF/1N checkcif.pdf
- CIF/1N.cif
- CIF/1O checkcif.pdf
- CIF/1O.cif
- CIF/1P checkcif.pdf
- CIF/1P.cif
- CIF/1Q checkcif.pdf
- CIF/1Q.cif
- CIF/1R checkcif.pdf
- CIF/1R.cif
- CIF/1S checkcif.pdf
- CIF/1S.cif
- CIF/1T checkcif.pdf
- CIF/1T.cif
- CIF/1U checkcif.pdf
- CIF/1U.cif
- CIF/1V checkcif.pdf
- CIF/1V.cif
- CIF/1W checkcif.pdf
- CIF/1W.cif
- CIF/1X checkcif.pdf
- CIF/1X.cif
- CIF/1Y checkcif.pdf
- CIF/1Y.cif
- CIF/1Z checkcif.pdf
- CIF/1Z.cif
