# Supplementary material
Source: publisher figshare collection journal article supplement (https://acs.figshare.com/ndownloader/files/22494656)
Supplement: Supplementary file 1 [file 22494656 › CIF/1N.cif]

data_1n
_audit_creation_date               2019-04-09
_audit_creation_method
;
Olex2 1.2
(compiled 2018.05.29 svn.r3508 for OlexSys, GUI svn.r5506)
;
_shelx_SHELXL_version_number       '2016/6'
_audit_contact_author_address      ?
_audit_contact_author_email        ?
_audit_contact_author_name         ''
_audit_contact_author_phone        ?
_publ_contact_author_id_orcid      ?
_publ_section_references
;
Dolomanov, O.V., Bourhis, L.J., Gildea, R.J, Howard, J.A.K. & Puschmann, H.
 (2009), J. Appl. Cryst. 42, 339-341.

Sheldrick, G.M. (2008). Acta Cryst. A64, 112-122.
;
_chemical_name_common              ?
_chemical_name_systematic          ?
_chemical_formula_moiety           'C44 H33 Cu2 I2 N6 O2, 2(C H Cl3)'
_chemical_formula_sum              'C46 H36 Cl6 Cu2 I2 N6 O2'
_chemical_formula_weight           1298.39
_chemical_melting_point            ?
loop_
  _atom_type_symbol
  _atom_type_description
  _atom_type_scat_dispersion_real
  _atom_type_scat_dispersion_imag
  _atom_type_scat_source
 'C' 'C' 0.0033 0.0016 'International Tables Vol C Tables 4.2.6.8 and 6.1.1.4'
 'H' 'H' 0.0000 0.0000 'International Tables Vol C Tables 4.2.6.8 and 6.1.1.4'
 'Cl' 'Cl' 0.1484 0.1585 'International Tables Vol C Tables 4.2.6.8 and 6.1.1.4'
 'Cu' 'Cu' 0.3201 1.2651 'International Tables Vol C Tables 4.2.6.8 and 6.1.1.4'
 'I' 'I' -0.4742 1.8119 'International Tables Vol C Tables 4.2.6.8 and 6.1.1.4'
 'N' 'N' 0.0061 0.0033 'International Tables Vol C Tables 4.2.6.8 and 6.1.1.4'
 'O' 'O' 0.0106 0.0060 'International Tables Vol C Tables 4.2.6.8 and 6.1.1.4'

_shelx_space_group_comment
;
The symmetry employed for this shelxl refinement is uniquely defined
by the following loop, which should always be used as a source of
symmetry information in preference to the above space-group names.
They are only intended as comments.
;
_space_group_crystal_system        'triclinic'
_space_group_IT_number             2
_space_group_name_H-M_alt          'P -1'
_space_group_name_Hall             '-P 1'
loop_
  _space_group_symop_operation_xyz
 'x, y, z'
 '-x, -y, -z'

_cell_length_a                     12.166(4)
_cell_length_b                     13.376(5)
_cell_length_c                     18.035(5)
_cell_angle_alpha                  68.76(2)
_cell_angle_beta                   74.17(2)
_cell_angle_gamma                  66.27(2)
_cell_volume                       2476.5(15)
_cell_formula_units_Z              2
_cell_measurement_reflns_used      6826
_cell_measurement_temperature      100(2)
_cell_measurement_theta_max        25.29
_cell_measurement_theta_min        2.39
_shelx_estimated_absorpt_T_max     0.487
_shelx_estimated_absorpt_T_min     0.470
_exptl_absorpt_coefficient_mu      2.473
_exptl_absorpt_correction_T_max    0.745217
_exptl_absorpt_correction_T_min    0.425363
_exptl_absorpt_correction_type     multi-scan
_exptl_absorpt_process_details
;
 TWINABS-2012/1 (Bruker,2012) was used for absorption correction.

Final HKLF 4 output contains 29168 reflections, Rint = 0.1165
 (12431 with I > 3sig(I), Rint = 0.0756)
;
_exptl_absorpt_special_details     ?
_exptl_crystal_colour              'clear dark red'
_exptl_crystal_colour_lustre       clear
_exptl_crystal_colour_modifier     dark
_exptl_crystal_colour_primary      red
_exptl_crystal_density_diffrn      1.741
_exptl_crystal_density_meas        ?
_exptl_crystal_density_method      ?
_exptl_crystal_description         block
_exptl_crystal_F_000               1272
_exptl_crystal_size_max            0.36
_exptl_crystal_size_mid            0.35
_exptl_crystal_size_min            0.34
_exptl_transmission_factor_max     ?
_exptl_transmission_factor_min     ?
_diffrn_reflns_av_R_equivalents    ?
_diffrn_reflns_av_unetI/netI       0.1345
_diffrn_reflns_Laue_measured_fraction_full  0.961
_diffrn_reflns_Laue_measured_fraction_max  0.947
_diffrn_reflns_limit_h_max         14
_diffrn_reflns_limit_h_min         -13
_diffrn_reflns_limit_k_max         16
_diffrn_reflns_limit_k_min         -14
_diffrn_reflns_limit_l_max         21
_diffrn_reflns_limit_l_min         0
_diffrn_reflns_number              8187
_diffrn_reflns_point_group_measured_fraction_full  0.961
_diffrn_reflns_point_group_measured_fraction_max  0.947
_diffrn_reflns_theta_full          25.000
_diffrn_reflns_theta_max           25.438
_diffrn_reflns_theta_min           1.225
_diffrn_ambient_temperature        100
_diffrn_detector_area_resol_mean   ?
_diffrn_measured_fraction_theta_full  0.961
_diffrn_measured_fraction_theta_max  0.947
_diffrn_measurement_device_type    'Bruker APEX-II CCD'
_diffrn_measurement_method         '\f and \w scans'
_diffrn_radiation_type             MoK\a
_diffrn_radiation_wavelength       0.71073
_diffrn_source                     ?
_diffrn_standards_number           0
_reflns_Friedel_coverage           0.000
_reflns_Friedel_fraction_full      .
_reflns_Friedel_fraction_max       .
_reflns_number_gt                  4960
_reflns_number_total               8187
_reflns_special_details
;
 _reflns_Friedel_fraction is defined as the number of unique
 Friedel pairs measured divided by the number that would be
 possible theoretically, ignoring centric projections and
 systematic absences.
;
_reflns_threshold_expression       'I > 2\s(I)'
_computing_cell_refinement         'SAINT v8.34A (Bruker, 2013)'
_computing_data_collection         ?
_computing_data_reduction          'SAINT v8.34A (Bruker, 2013)'
_computing_molecular_graphics      'Olex2 (Dolomanov et al., 2009)'
_computing_publication_material    'Olex2 (Dolomanov et al., 2009)'
_computing_structure_refinement    'XL (Sheldrick, 2008)'
_computing_structure_solution      'ShelXS (Sheldrick, 2008)'
_refine_diff_density_max           3.509
_refine_diff_density_min           -1.858
_refine_diff_density_rms           0.364
_refine_ls_extinction_coef         .
_refine_ls_extinction_method       none
_refine_ls_goodness_of_fit_ref     1.228
_refine_ls_hydrogen_treatment      constr
_refine_ls_matrix_type             full
_refine_ls_number_parameters       556
_refine_ls_number_reflns           8187
_refine_ls_number_restraints       0
_refine_ls_R_factor_all            0.2030
_refine_ls_R_factor_gt             0.1083
_refine_ls_restrained_S_all        1.228
_refine_ls_shift/su_max            0.001
_refine_ls_shift/su_mean           0.000
_refine_ls_structure_factor_coef   Fsqd
_refine_ls_weighting_details      
 'w=1/[\s^2^(Fo^2^)+(0.2000P)^2^] where P=(Fo^2^+2Fc^2^)/3'
_refine_ls_weighting_scheme        calc
_refine_ls_wR_factor_gt            0.2767
_refine_ls_wR_factor_ref           0.3533
_refine_special_details
;
 Refined as a 2-component twin.
;
_olex2_refinement_description
;
1. Twinned data refinement
 Scales: 0.546(3)
 0.454(3)
2. Fixed Uiso
 At 1.2 times of:
  All C(H) groups
 At 1.5 times of:
  All C(H,H,H) groups
3. Uiso/Uaniso restraints and constraints
Uanis(C10) = Uanis(C23)
Uanis(C39) = Uanis(C35)
Uanis(C41) = Uanis(C2)
Uanis(C9) = Uanis(C24)
4.a Ternary CH refined with riding coordinates:
 C46(H46), C45(H45)
4.b Aromatic/amide H refined with riding coordinates:
 C5(H5), C36(H36), C21(H21), C26(H26), C2(H2), C37(H37), C40(H40), C42(H42),
 C27(H27), C7(H7), C43(H43), C39(H39), C1(H1), C34(H34), C9(H9), C13(H13),
 C0AA(H0AA), C20(H20), C23(H23), C17(H17), C35(H35), C24(H24), C15(H15),
 C14(H14), C18(H18), C4(H4), C12(H12)
4.c Idealised Me refined as rotating group:
 C44(H44A,H44B,H44C), C22(H22A,H22B,H22C)
;
_atom_sites_solution_hydrogens     geom
_atom_sites_solution_primary       direct
_atom_sites_solution_secondary     ?
loop_
  _atom_site_label
  _atom_site_type_symbol
  _atom_site_fract_x
  _atom_site_fract_y
  _atom_site_fract_z
  _atom_site_U_iso_or_equiv
  _atom_site_adp_type
  _atom_site_occupancy
  _atom_site_site_symmetry_order
  _atom_site_calc_flag
  _atom_site_refinement_flags_posn
  _atom_site_refinement_flags_adp
  _atom_site_refinement_flags_occupancy
  _atom_site_disorder_assembly
  _atom_site_disorder_group
 I001 I 0.38620(13) 0.38295(12) 0.51385(8) 0.0354(4) Uani 1 1 d . . . . .
 I002 I 1.31985(13) 0.11233(11) -0.04919(8) 0.0369(4) Uani 1 1 d . . . . .
 Cu03 Cu 0.5451(2) 0.4266(2) 0.56223(14) 0.0334(7) Uani 1 1 d . . . . .
 Cu04 Cu 1.4416(2) -0.0574(2) 0.06218(14) 0.0314(6) Uani 1 1 d . . . . .
 Cl1 Cl 0.8234(7) 0.4517(8) 0.7071(4) 0.074(2) Uani 1 1 d . . . . .
 Cl3 Cl 1.0488(7) 0.4372(8) 0.6001(5) 0.094(3) Uani 1 1 d . . . . .
 Cl2 Cl 0.8671(8) 0.6540(8) 0.5976(6) 0.092(3) Uani 1 1 d . . . . .
 Cl4 Cl 0.9751(10) 0.2332(10) 0.9224(7) 0.114(4) Uani 1 1 d . . . . .
 O2 O 1.5605(14) -0.1657(13) 0.7838(9) 0.042(4) Uani 1 1 d . . . . .
 N4 N 0.7111(13) 0.3058(13) 0.5435(9) 0.025(4) Uani 1 1 d . . . . .
 O1 O -0.1647(13) 0.2663(13) 1.2559(9) 0.040(4) Uani 1 1 d . . . . .
 N3 N 0.4175(17) 0.8084(15) 1.0485(9) 0.034(4) Uani 1 1 d . . . . .
 N1 N 0.4670(15) 0.4474(15) 0.6718(10) 0.032(4) Uani 1 1 d . . . . .
 N6 N 1.3684(14) -0.0396(14) 0.1737(10) 0.029(4) Uani 1 1 d . . . . .
 C33 C 1.2769(18) -0.0083(16) 0.3269(11) 0.028(5) Uani 1 1 d . . . . .
 C30 C 1.2836(19) 0.0020(16) 0.5340(11) 0.028(5) Uani 1 1 d . . . . .
 C31 C 1.2386(17) 0.0157(15) 0.4067(11) 0.026(5) Uani 1 1 d . . . . .
 C5 C 1.3212(19) -0.0190(18) 0.4602(12) 0.032(5) Uani 1 1 d . . . . .
 H5 H 1.404713 -0.057796 0.444988 0.038 Uiso 1 1 calc R . . . .
 N2 N 0.3480(16) 0.5554(13) 0.9289(10) 0.030(4) Uani 1 1 d . . . . .
 Cl5 Cl 0.9345(19) 0.0391(15) 0.9093(16) 0.219(10) Uani 1 1 d . . . . .
 N32 N 1.1229(16) 0.0773(14) 0.4226(10) 0.031(4) Uani 1 1 d . . . . .
 C36 C 1.4225(19) -0.1039(16) 0.2341(13) 0.034(5) Uani 1 1 d . . . . .
 H36 H 1.493833 -0.166009 0.226188 0.041 Uiso 1 1 calc R . . . .
 C8 C 0.1798(17) 0.4548(16) 1.0358(11) 0.031(5) Uani 1 1 d . . . . .
 C11 C 0.3497(18) 0.6478(16) 1.0179(11) 0.027(5) Uani 1 1 d . . . . .
 C41 C 1.5035(16) -0.1287(16) 0.7194(12) 0.027(3) Uani 1 1 d . . . . .
 C21 C 0.0563(18) 0.3274(16) 1.0760(12) 0.029(5) Uani 1 1 d . . . . .
 H21 H 0.091290 0.308543 1.026831 0.035 Uiso 1 1 calc R . . . .
 C6 C 0.3123(18) 0.4892(19) 0.9078(10) 0.030(5) Uani 1 1 d . . . . .
 C29 C 1.1595(19) 0.0616(17) 0.5521(12) 0.034(5) Uani 1 1 d . . . . .
 C26 C 0.874(2) 0.213(2) 0.4559(12) 0.036(5) Uani 1 1 d . . . . .
 H26 H 0.903498 0.198989 0.404864 0.043 Uiso 1 1 calc R . . . .
 C2 C 0.3340(16) 0.4100(16) 0.7926(12) 0.027(3) Uani 1 1 d . . . . .
 H2 H 0.275714 0.373955 0.822113 0.033 Uiso 1 1 calc R . . . .
 Cl6 Cl 1.088(2) 0.165(2) 0.7831(10) 0.286(16) Uani 1 1 d . . . . .
 C10 C 0.307(2) 0.5704(19) 1.0005(13) 0.035(4) Uani 1 1 d . . . . .
 C28 C 1.0832(18) 0.1011(18) 0.4943(12) 0.028(5) Uani 1 1 d . . . . .
 C37 C 1.3847(18) -0.0899(17) 0.3109(11) 0.026(4) Uani 1 1 d . . . . .
 H37 H 1.433772 -0.136855 0.351987 0.032 Uiso 1 1 calc R . . . .
 C40 C 1.4084(18) -0.0268(16) 0.7125(13) 0.032(5) Uani 1 1 d . . . . .
 H40 H 1.389822 0.012101 0.751581 0.038 Uiso 1 1 calc R . . . .
 C19 C -0.082(2) 0.308(2) 1.1983(11) 0.036(5) Uani 1 1 d . . . . .
 C42 C 1.5326(16) -0.1839(16) 0.6632(12) 0.022(4) Uani 1 1 d . . . . .
 H42 H 1.600287 -0.252386 0.665940 0.027 Uiso 1 1 calc R . . . .
 C27 C 0.7541(19) 0.2786(19) 0.4744(12) 0.035(5) Uani 1 1 d . . . . .
 H27 H 0.700582 0.304964 0.436401 0.042 Uiso 1 1 calc R . . . .
 C16 C 0.0896(19) 0.4066(15) 1.0917(11) 0.027(5) Uani 1 1 d . . . . .
 C38 C 1.3641(16) -0.0395(16) 0.5939(11) 0.023(4) Uani 1 1 d . . . . .
 C7 C 0.2292(18) 0.4375(16) 0.9585(10) 0.025(4) Uani 1 1 d . . . . .
 H7 H 0.205414 0.390770 0.941458 0.030 Uiso 1 1 calc R . . . .
 C43 C 1.4638(18) -0.1406(15) 0.6017(11) 0.026(5) Uani 1 1 d . . . . .
 H43 H 1.485197 -0.181180 0.563291 0.032 Uiso 1 1 calc R . . . .
 C39 C 1.338(2) 0.0219(17) 0.6502(12) 0.032(3) Uani 1 1 d . . . . .
 H39 H 1.274383 0.093488 0.645791 0.038 Uiso 1 1 calc R . . . .
 C1 C 0.388(2) 0.3982(19) 0.7195(12) 0.037(5) Uani 1 1 d . . . . .
 H1 H 0.368911 0.350644 0.700494 0.044 Uiso 1 1 calc R . . . .
 C34 C 1.2115(18) 0.061(2) 0.2644(11) 0.036(6) Uani 1 1 d . . . . .
 H34 H 1.136100 0.118898 0.272125 0.043 Uiso 1 1 calc R . . . .
 C25 C 0.9508(16) 0.1687(15) 0.5133(11) 0.022(4) Uani 1 1 d . . . . .
 C9 C 0.2250(19) 0.5219(19) 1.0556(12) 0.034(4) Uani 1 1 d . . . . .
 H9 H 0.199084 0.534050 1.107264 0.040 Uiso 1 1 calc R . . . .
 C44 C 1.662(2) -0.265(2) 0.7899(15) 0.045(6) Uani 1 1 d . . . . .
 H44A H 1.721044 -0.256443 0.740657 0.068 Uiso 1 1 calc GR . . . .
 H44B H 1.637233 -0.329909 0.797382 0.068 Uiso 1 1 calc GR . . . .
 H44C H 1.699902 -0.279741 0.836106 0.068 Uiso 1 1 calc GR . . . .
 C46 C 0.899(3) 0.514(3) 0.6087(15) 0.066(8) Uani 1 1 d . . . . .
 H46 H 0.864121 0.508700 0.566439 0.079 Uiso 1 1 calc R . . . .
 C13 C 0.369(2) 0.735(2) 1.1063(13) 0.038(5) Uani 1 1 d . . . . .
 H13 H 0.355444 0.740219 1.159384 0.046 Uiso 1 1 calc R . . . .
 C0AA C 0.497(2) 0.506(2) 0.7037(13) 0.041(6) Uani 1 1 d . . . . .
 H0AA H 0.559900 0.536066 0.673460 0.049 Uiso 1 1 calc R . . . .
 C20 C -0.023(2) 0.2770(19) 1.1276(13) 0.042(6) Uani 1 1 d . . . . .
 H20 H -0.038556 0.220516 1.115893 0.050 Uiso 1 1 calc R . . . .
 C23 C 0.785(2) 0.2670(18) 0.5961(13) 0.035(4) Uani 1 1 d . . . . .
 H23 H 0.753711 0.284698 0.645913 0.042 Uiso 1 1 calc R . . . .
 C17 C 0.0338(19) 0.4339(19) 1.1632(12) 0.036(5) Uani 1 1 d . . . . .
 H17 H 0.053672 0.486911 1.175961 0.043 Uiso 1 1 calc R . . . .
 C35 C 1.261(2) 0.0409(16) 0.1886(12) 0.032(3) Uani 1 1 d . . . . .
 H35 H 1.215537 0.086990 0.145372 0.038 Uiso 1 1 calc R . . . .
 C3 C 0.3615(17) 0.4738(17) 0.8256(12) 0.028(5) Uani 1 1 d . . . . .
 C24 C 0.905(2) 0.2028(19) 0.5842(11) 0.034(4) Uani 1 1 d . . . . .
 H24 H 0.956757 0.181815 0.622637 0.040 Uiso 1 1 calc R . . . .
 C15 C 0.415(2) 0.716(2) 0.9613(14) 0.050(7) Uani 1 1 d . . . . .
 H15 H 0.441335 0.707015 0.908599 0.060 Uiso 1 1 calc R . . . .
 C22 C -0.206(2) 0.193(2) 1.2360(14) 0.053(7) Uani 1 1 d . . . . .
 H22A H -0.230442 0.229273 1.182223 0.080 Uiso 1 1 calc GR . . . .
 H22B H -0.276260 0.179406 1.275510 0.080 Uiso 1 1 calc GR . . . .
 H22C H -0.140752 0.119645 1.236756 0.080 Uiso 1 1 calc GR . . . .
 C14 C 0.440(2) 0.790(2) 0.9779(13) 0.049(7) Uani 1 1 d . . . . .
 H14 H 0.479713 0.835962 0.934547 0.058 Uiso 1 1 calc R . . . .
 C18 C -0.048(2) 0.387(2) 1.2154(12) 0.047(6) Uani 1 1 d . . . . .
 H18 H -0.083669 0.407390 1.264163 0.056 Uiso 1 1 calc R . . . .
 C4 C 0.446(2) 0.527(2) 0.7759(11) 0.042(6) Uani 1 1 d . . . . .
 H4 H 0.465839 0.576678 0.792510 0.050 Uiso 1 1 calc R . . . .
 C12 C 0.335(2) 0.6546(19) 1.0983(12) 0.042(6) Uani 1 1 d . . . . .
 H12 H 0.304137 0.604586 1.143750 0.050 Uiso 1 1 calc R . . . .
 C45 C 1.043(3) 0.120(4) 0.886(2) 0.112(16) Uani 1 1 d . . . . .
 H45 H 1.116363 0.067904 0.912920 0.135 Uiso 1 1 calc R . . . .

loop_
  _atom_site_aniso_label
  _atom_site_aniso_U_11
  _atom_site_aniso_U_22
  _atom_site_aniso_U_33
  _atom_site_aniso_U_23
  _atom_site_aniso_U_13
  _atom_site_aniso_U_12
 I001 0.0368(8) 0.0331(8) 0.0324(7) -0.0113(6) 0.0000(6) -0.0096(7)
 I002 0.0354(8) 0.0325(8) 0.0328(7) -0.0051(6) -0.0050(6) -0.0054(7)
 Cu03 0.0287(14) 0.0300(14) 0.0298(13) -0.0073(11) -0.0043(11) 0.0004(12)
 Cu04 0.0403(15) 0.0286(13) 0.0259(12) -0.0078(10) -0.0020(11) -0.0139(12)
 Cl1 0.081(5) 0.109(6) 0.042(4) -0.023(4) 0.010(3) -0.055(5)
 Cl3 0.066(5) 0.111(7) 0.055(4) -0.014(4) -0.006(4) 0.008(5)
 Cl2 0.084(6) 0.081(6) 0.108(7) -0.024(5) 0.002(5) -0.039(5)
 Cl4 0.105(7) 0.113(8) 0.131(9) -0.067(7) -0.036(7) -0.003(6)
 O2 0.049(10) 0.037(9) 0.043(9) -0.013(7) -0.013(7) -0.012(8)
 N4 0.006(8) 0.025(8) 0.038(9) -0.007(7) -0.001(7) 0.000(7)
 O1 0.029(8) 0.042(9) 0.037(8) 0.000(7) -0.004(7) -0.009(7)
 N3 0.049(12) 0.044(10) 0.027(9) -0.011(8) 0.006(8) -0.040(10)
 N1 0.023(9) 0.032(9) 0.029(9) -0.010(8) 0.005(8) -0.002(8)
 N6 0.023(9) 0.029(9) 0.027(9) -0.013(7) -0.007(7) 0.005(8)
 C33 0.029(12) 0.022(10) 0.027(10) -0.001(8) -0.003(9) -0.009(10)
 C30 0.032(12) 0.019(10) 0.026(10) -0.007(8) 0.000(9) -0.007(9)
 C31 0.018(11) 0.014(9) 0.021(9) 0.005(7) 0.002(8) 0.007(8)
 C5 0.029(12) 0.033(11) 0.029(11) -0.014(9) 0.008(9) -0.011(10)
 N2 0.046(11) 0.012(8) 0.035(10) -0.006(7) -0.014(8) -0.010(8)
 Cl5 0.195(16) 0.129(12) 0.37(3) -0.091(17) -0.138(19) -0.012(12)
 N32 0.036(11) 0.025(9) 0.030(9) -0.009(7) -0.003(8) -0.009(8)
 C36 0.025(12) 0.014(10) 0.056(14) -0.013(10) 0.006(11) -0.004(9)
 C8 0.019(11) 0.023(11) 0.021(10) 0.003(8) 0.002(8) 0.010(9)
 C11 0.034(12) 0.022(10) 0.034(11) -0.010(8) 0.009(9) -0.023(9)
 C41 0.009(7) 0.027(8) 0.046(9) -0.010(7) 0.000(6) -0.010(6)
 C21 0.028(11) 0.020(10) 0.030(11) -0.013(9) 0.000(9) 0.002(9)
 C6 0.024(11) 0.041(12) 0.012(9) -0.003(8) 0.000(8) -0.002(10)
 C29 0.029(12) 0.028(11) 0.035(11) -0.004(9) 0.001(9) -0.009(10)
 C26 0.042(14) 0.052(14) 0.016(10) -0.007(9) -0.002(9) -0.021(12)
 C2 0.009(7) 0.027(8) 0.046(9) -0.010(7) 0.000(6) -0.010(6)
 Cl6 0.243(19) 0.35(3) 0.139(13) -0.135(18) -0.098(13) 0.13(2)
 C10 0.043(10) 0.037(9) 0.037(9) -0.011(7) -0.007(7) -0.025(8)
 C28 0.019(11) 0.035(12) 0.032(11) -0.011(9) 0.000(9) -0.011(9)
 C37 0.029(12) 0.030(11) 0.021(9) 0.001(8) -0.005(8) -0.017(10)
 C40 0.031(12) 0.017(10) 0.046(12) -0.009(9) 0.001(10) -0.012(9)
 C19 0.042(13) 0.055(14) 0.013(9) -0.010(9) -0.006(9) -0.018(12)
 C42 0.006(9) 0.021(10) 0.038(11) -0.013(9) -0.006(8) 0.003(8)
 C27 0.022(12) 0.050(14) 0.030(11) -0.021(10) 0.000(9) -0.003(11)
 C16 0.041(13) 0.010(9) 0.024(10) 0.001(7) -0.004(9) -0.008(9)
 C38 0.020(10) 0.022(10) 0.027(10) -0.004(8) 0.000(8) -0.013(9)
 C7 0.036(12) 0.025(10) 0.018(9) -0.015(8) 0.003(8) -0.010(9)
 C43 0.030(11) 0.013(9) 0.025(10) 0.000(7) -0.003(8) -0.001(9)
 C39 0.042(9) 0.019(7) 0.035(8) -0.002(6) -0.013(7) -0.009(7)
 C1 0.051(15) 0.043(13) 0.036(12) -0.019(10) -0.002(10) -0.032(12)
 C34 0.014(10) 0.057(14) 0.021(10) -0.020(10) 0.001(8) 0.009(10)
 C25 0.014(10) 0.019(10) 0.033(10) -0.007(8) -0.003(8) -0.005(8)
 C9 0.034(9) 0.048(9) 0.019(7) -0.006(6) 0.003(6) -0.020(8)
 C44 0.048(15) 0.043(14) 0.055(15) -0.006(11) -0.015(12) -0.030(13)
 C46 0.063(19) 0.09(2) 0.040(14) -0.015(14) -0.013(13) -0.021(17)
 C13 0.036(13) 0.059(15) 0.035(12) -0.011(11) 0.000(10) -0.036(12)
 C0AA 0.042(14) 0.054(15) 0.036(12) -0.015(11) -0.009(10) -0.022(12)
 C20 0.056(16) 0.034(12) 0.041(13) -0.011(10) -0.023(11) -0.010(12)
 C23 0.043(10) 0.037(9) 0.037(9) -0.011(7) -0.007(7) -0.025(8)
 C17 0.032(12) 0.042(13) 0.032(11) -0.009(10) 0.002(9) -0.017(11)
 C35 0.042(9) 0.019(7) 0.035(8) -0.002(6) -0.013(7) -0.009(7)
 C3 0.014(10) 0.027(11) 0.035(11) -0.001(9) -0.005(9) -0.005(9)
 C24 0.034(9) 0.048(9) 0.019(7) -0.006(6) 0.003(6) -0.020(8)
 C15 0.075(19) 0.052(15) 0.036(13) -0.021(12) -0.002(12) -0.031(14)
 C22 0.055(16) 0.055(16) 0.049(15) 0.006(12) 0.004(12) -0.044(14)
 C14 0.079(19) 0.056(15) 0.033(12) -0.026(11) 0.019(12) -0.051(15)
 C18 0.045(15) 0.072(17) 0.018(11) -0.012(11) 0.000(10) -0.018(13)
 C4 0.060(16) 0.059(15) 0.010(9) 0.004(9) -0.003(10) -0.037(13)
 C12 0.062(16) 0.041(13) 0.023(11) -0.008(10) 0.006(10) -0.027(12)
 C45 0.035(16) 0.19(4) 0.11(3) -0.08(3) -0.034(18) 0.01(2)

_geom_special_details
;
 All esds (except the esd in the dihedral angle between two l.s. planes)
 are estimated using the full covariance matrix.  The cell esds are taken
 into account individually in the estimation of esds in distances, angles
 and torsion angles; correlations between esds in cell parameters are only
 used when they are defined by crystal symmetry.  An approximate (isotropic)
 treatment of cell esds is used for estimating esds involving l.s. planes.
;
loop_
  _geom_bond_atom_site_label_1
  _geom_bond_atom_site_label_2
  _geom_bond_distance
  _geom_bond_site_symmetry_2
  _geom_bond_publ_flag
 I001 Cu03 2.653(3) . ?
 I001 Cu03 2.762(3) 2_666 ?
 I002 Cu04 2.645(3) . ?
 I002 Cu04 2.656(3) 2_855 ?
 Cu03 Cu03 2.552(5) 2_666 ?
 Cu03 N4 2.050(14) . ?
 Cu03 N1 2.012(15) . ?
 Cu04 Cu04 2.632(5) 2_855 ?
 Cu04 N3 2.038(16) 1_644 ?
 Cu04 N6 2.024(15) . ?
 Cl1 C46 1.83(3) . ?
 Cl3 C46 1.69(3) . ?
 Cl2 C46 1.70(3) . ?
 Cl4 C45 1.68(4) . ?
 O2 C41 1.35(2) . ?
 O2 C44 1.40(3) . ?
 N4 C27 1.33(2) . ?
 N4 C23 1.31(3) . ?
 O1 C19 1.37(3) . ?
 O1 C22 1.46(3) . ?
 N3 C13 1.34(3) . ?
 N3 C14 1.32(2) . ?
 N1 C1 1.32(3) . ?
 N1 C0AA 1.32(3) . ?
 N6 C36 1.27(3) . ?
 N6 C35 1.35(3) . ?
 C33 C31 1.50(3) . ?
 C33 C37 1.37(3) . ?
 C33 C34 1.38(3) . ?
 C30 C5 1.38(2) . ?
 C30 C29 1.40(3) . ?
 C30 C38 1.46(3) . ?
 C31 C5 1.41(3) . ?
 C31 N32 1.33(2) . ?
 C5 H5 0.9500 . ?
 N2 C6 1.33(3) . ?
 N2 C10 1.31(2) . ?
 Cl5 C45 1.90(5) . ?
 N32 C28 1.36(2) . ?
 C36 H36 0.9500 . ?
 C36 C37 1.39(3) . ?
 C8 C16 1.46(3) . ?
 C8 C7 1.42(2) . ?
 C8 C9 1.40(3) . ?
 C11 C10 1.48(3) . ?
 C11 C15 1.40(3) . ?
 C11 C12 1.44(3) . ?
 C41 C40 1.38(3) . ?
 C41 C42 1.35(3) . ?
 C21 H21 0.9500 . ?
 C21 C16 1.41(3) . ?
 C21 C20 1.35(3) . ?
 C6 C7 1.39(3) . ?
 C6 C3 1.50(3) . ?
 C29 C28 1.40(3) . ?
 C26 H26 0.9500 . ?
 C26 C27 1.39(3) . ?
 C26 C25 1.39(3) . ?
 C2 H2 0.9500 . ?
 C2 C1 1.34(3) . ?
 C2 C3 1.38(3) . ?
 Cl6 C45 1.74(4) . ?
 C10 C9 1.38(3) . ?
 C28 C25 1.51(3) . ?
 C37 H37 0.9500 . ?
 C40 H40 0.9500 . ?
 C40 C39 1.40(3) . ?
 C19 C20 1.40(3) . ?
 C19 C18 1.43(3) . ?
 C42 H42 0.9500 . ?
 C42 C43 1.38(3) . ?
 C27 H27 0.9500 . ?
 C16 C17 1.39(3) . ?
 C38 C43 1.40(3) . ?
 C38 C39 1.42(3) . ?
 C7 H7 0.9500 . ?
 C43 H43 0.9500 . ?
 C39 H39 0.9500 . ?
 C1 H1 0.9500 . ?
 C34 H34 0.9500 . ?
 C34 C35 1.41(3) . ?
 C25 C24 1.41(2) . ?
 C9 H9 0.9500 . ?
 C44 H44A 0.9800 . ?
 C44 H44B 0.9800 . ?
 C44 H44C 0.9800 . ?
 C46 H46 1.0000 . ?
 C13 H13 0.9500 . ?
 C13 C12 1.36(3) . ?
 C0AA H0AA 0.9500 . ?
 C0AA C4 1.36(3) . ?
 C20 H20 0.9500 . ?
 C23 H23 0.9500 . ?
 C23 C24 1.37(3) . ?
 C17 H17 0.9500 . ?
 C17 C18 1.35(3) . ?
 C35 H35 0.9500 . ?
 C3 C4 1.41(3) . ?
 C24 H24 0.9500 . ?
 C15 H15 0.9500 . ?
 C15 C14 1.30(3) . ?
 C22 H22A 0.9800 . ?
 C22 H22B 0.9800 . ?
 C22 H22C 0.9800 . ?
 C14 H14 0.9500 . ?
 C18 H18 0.9500 . ?
 C4 H4 0.9500 . ?
 C12 H12 0.9500 . ?
 C45 H45 1.0000 . ?

loop_
  _geom_angle_atom_site_label_1
  _geom_angle_atom_site_label_2
  _geom_angle_atom_site_label_3
  _geom_angle
  _geom_angle_site_symmetry_1
  _geom_angle_site_symmetry_3
  _geom_angle_publ_flag
 Cu03 I001 Cu03 56.21(10) . 2_666 ?
 Cu04 I002 Cu04 59.54(10) . 2_855 ?
 I001 Cu03 I001 123.79(10) . 2_666 ?
 Cu03 Cu03 I001 64.05(12) 2_666 . ?
 Cu03 Cu03 I001 59.74(11) 2_666 2_666 ?
 N4 Cu03 I001 107.1(5) . . ?
 N4 Cu03 I001 97.9(5) . 2_666 ?
 N4 Cu03 Cu03 117.1(5) . 2_666 ?
 N1 Cu03 I001 102.3(5) . 2_666 ?
 N1 Cu03 I001 104.8(5) . . ?
 N1 Cu03 Cu03 119.8(5) . 2_666 ?
 N1 Cu03 N4 122.4(7) . . ?
 I002 Cu04 I002 120.46(10) . 2_855 ?
 Cu04 Cu04 I002 60.44(10) 2_855 . ?
 Cu04 Cu04 I002 60.02(11) 2_855 2_855 ?
 N3 Cu04 I002 105.5(5) 1_644 2_855 ?
 N3 Cu04 I002 100.5(5) 1_644 . ?
 N3 Cu04 Cu04 116.8(4) 1_644 2_855 ?
 N6 Cu04 I002 111.7(5) . . ?
 N6 Cu04 I002 107.3(5) . 2_855 ?
 N6 Cu04 Cu04 132.2(5) . 2_855 ?
 N6 Cu04 N3 111.0(7) . 1_644 ?
 C41 O2 C44 117.1(16) . . ?
 C27 N4 Cu03 122.5(13) . . ?
 C23 N4 Cu03 118.5(13) . . ?
 C23 N4 C27 118.1(16) . . ?
 C19 O1 C22 115.6(16) . . ?
 C13 N3 Cu04 125.7(13) . 1_466 ?
 C14 N3 Cu04 122.3(14) . 1_466 ?
 C14 N3 C13 111.9(17) . . ?
 C1 N1 Cu03 123.1(15) . . ?
 C1 N1 C0AA 114.7(17) . . ?
 C0AA N1 Cu03 122.0(15) . . ?
 C36 N6 Cu04 121.2(13) . . ?
 C36 N6 C35 116.1(16) . . ?
 C35 N6 Cu04 122.6(13) . . ?
 C37 C33 C31 121.0(18) . . ?
 C37 C33 C34 117.8(17) . . ?
 C34 C33 C31 120.7(17) . . ?
 C5 C30 C29 116.4(18) . . ?
 C5 C30 C38 123.4(17) . . ?
 C29 C30 C38 120.1(17) . . ?
 C5 C31 C33 122.4(16) . . ?
 N32 C31 C33 115.9(17) . . ?
 N32 C31 C5 121.6(17) . . ?
 C30 C5 C31 121.4(18) . . ?
 C30 C5 H5 119.3 . . ?
 C31 C5 H5 119.3 . . ?
 C10 N2 C6 119.4(17) . . ?
 C31 N32 C28 118.4(17) . . ?
 N6 C36 H36 117.6 . . ?
 N6 C36 C37 124.7(18) . . ?
 C37 C36 H36 117.6 . . ?
 C7 C8 C16 123.6(19) . . ?
 C9 C8 C16 121.5(17) . . ?
 C9 C8 C7 115.0(17) . . ?
 C15 C11 C10 125.1(18) . . ?
 C15 C11 C12 112.2(18) . . ?
 C12 C11 C10 122.5(17) . . ?
 O2 C41 C40 115.6(18) . . ?
 O2 C41 C42 125.1(17) . . ?
 C42 C41 C40 119(2) . . ?
 C16 C21 H21 118.3 . . ?
 C20 C21 H21 118.3 . . ?
 C20 C21 C16 123.3(18) . . ?
 N2 C6 C7 122.1(16) . . ?
 N2 C6 C3 117.9(18) . . ?
 C7 C6 C3 120.0(18) . . ?
 C28 C29 C30 119.6(18) . . ?
 C27 C26 H26 120.6 . . ?
 C25 C26 H26 120.6 . . ?
 C25 C26 C27 118.8(17) . . ?
 C1 C2 H2 119.6 . . ?
 C1 C2 C3 120.8(18) . . ?
 C3 C2 H2 119.6 . . ?
 N2 C10 C11 115.4(17) . . ?
 N2 C10 C9 122.9(18) . . ?
 C9 C10 C11 121.6(18) . . ?
 N32 C28 C29 122.3(18) . . ?
 N32 C28 C25 118.5(17) . . ?
 C29 C28 C25 119.2(16) . . ?
 C33 C37 C36 119.7(18) . . ?
 C33 C37 H37 120.1 . . ?
 C36 C37 H37 120.1 . . ?
 C41 C40 H40 118.6 . . ?
 C41 C40 C39 122.7(19) . . ?
 C39 C40 H40 118.6 . . ?
 O1 C19 C20 127(2) . . ?
 O1 C19 C18 115.5(17) . . ?
 C20 C19 C18 117(2) . . ?
 C41 C42 H42 120.0 . . ?
 C41 C42 C43 120.1(17) . . ?
 C43 C42 H42 120.0 . . ?
 N4 C27 C26 122.6(19) . . ?
 N4 C27 H27 118.7 . . ?
 C26 C27 H27 118.7 . . ?
 C21 C16 C8 121.2(17) . . ?
 C17 C16 C8 122.5(18) . . ?
 C17 C16 C21 116.3(18) . . ?
 C43 C38 C30 123.4(17) . . ?
 C43 C38 C39 117.3(18) . . ?
 C39 C38 C30 119.2(17) . . ?
 C8 C7 H7 120.0 . . ?
 C6 C7 C8 120.0(18) . . ?
 C6 C7 H7 120.0 . . ?
 C42 C43 C38 122.6(17) . . ?
 C42 C43 H43 118.7 . . ?
 C38 C43 H43 118.7 . . ?
 C40 C39 C38 117.9(18) . . ?
 C40 C39 H39 121.1 . . ?
 C38 C39 H39 121.1 . . ?
 N1 C1 C2 125.1(19) . . ?
 N1 C1 H1 117.5 . . ?
 C2 C1 H1 117.5 . . ?
 C33 C34 H34 121.3 . . ?
 C33 C34 C35 117.4(17) . . ?
 C35 C34 H34 121.3 . . ?
 C26 C25 C28 120.4(17) . . ?
 C26 C25 C24 117.6(17) . . ?
 C24 C25 C28 121.3(17) . . ?
 C8 C9 H9 119.7 . . ?
 C10 C9 C8 120.5(18) . . ?
 C10 C9 H9 119.7 . . ?
 O2 C44 H44A 109.5 . . ?
 O2 C44 H44B 109.5 . . ?
 O2 C44 H44C 109.5 . . ?
 H44A C44 H44B 109.5 . . ?
 H44A C44 H44C 109.5 . . ?
 H44B C44 H44C 109.5 . . ?
 Cl1 C46 H46 108.2 . . ?
 Cl3 C46 Cl1 109.2(16) . . ?
 Cl3 C46 Cl2 114.1(18) . . ?
 Cl3 C46 H46 108.2 . . ?
 Cl2 C46 Cl1 108.7(14) . . ?
 Cl2 C46 H46 108.2 . . ?
 N3 C13 H13 116.0 . . ?
 N3 C13 C12 128.0(19) . . ?
 C12 C13 H13 116.0 . . ?
 N1 C0AA H0AA 117.3 . . ?
 N1 C0AA C4 125(2) . . ?
 C4 C0AA H0AA 117.3 . . ?
 C21 C20 C19 120(2) . . ?
 C21 C20 H20 120.1 . . ?
 C19 C20 H20 120.1 . . ?
 N4 C23 H23 117.8 . . ?
 N4 C23 C24 124.5(19) . . ?
 C24 C23 H23 117.8 . . ?
 C16 C17 H17 119.0 . . ?
 C18 C17 C16 122(2) . . ?
 C18 C17 H17 119.0 . . ?
 N6 C35 C34 123.9(18) . . ?
 N6 C35 H35 118.0 . . ?
 C34 C35 H35 118.0 . . ?
 C2 C3 C6 126.3(18) . . ?
 C2 C3 C4 115.2(18) . . ?
 C4 C3 C6 118.4(18) . . ?
 C25 C24 H24 121.0 . . ?
 C23 C24 C25 118.0(19) . . ?
 C23 C24 H24 121.0 . . ?
 C11 C15 H15 118.7 . . ?
 C14 C15 C11 123(2) . . ?
 C14 C15 H15 118.7 . . ?
 O1 C22 H22A 109.5 . . ?
 O1 C22 H22B 109.5 . . ?
 O1 C22 H22C 109.5 . . ?
 H22A C22 H22B 109.5 . . ?
 H22A C22 H22C 109.5 . . ?
 H22B C22 H22C 109.5 . . ?
 N3 C14 H14 116.6 . . ?
 C15 C14 N3 127(2) . . ?
 C15 C14 H14 116.6 . . ?
 C19 C18 H18 119.5 . . ?
 C17 C18 C19 121.0(19) . . ?
 C17 C18 H18 119.5 . . ?
 C0AA C4 C3 118(2) . . ?
 C0AA C4 H4 120.9 . . ?
 C3 C4 H4 120.9 . . ?
 C11 C12 H12 121.3 . . ?
 C13 C12 C11 117.4(19) . . ?
 C13 C12 H12 121.3 . . ?
 Cl4 C45 Cl5 109.8(18) . . ?
 Cl4 C45 Cl6 109(3) . . ?
 Cl4 C45 H45 109.1 . . ?
 Cl5 C45 H45 109.1 . . ?
 Cl6 C45 Cl5 111(2) . . ?
 Cl6 C45 H45 109.1 . . ?

_shelx_res_file
;
TITL 1n.res in P-1
    1n.res
    created by SHELXL-2016/6 at 13:09:28 on 09-Apr-2019
REM Old TITL SK260319_0m_4 in P-1
REM SHELXT solution in P-1
REM R1 0.272, Rweak 0.069, Alpha 0.134, Orientation as input
REM Formula found by SHELXT: C46 Cl6 Cu2 I2 N8 O4
CELL 0.71073 12.1661 13.3759 18.0354 68.763 74.174 66.272
ZERR 2 0.0042 0.0047 0.0052 0.021 0.02 0.022
LATT 1
SFAC C H Cl Cu I N O
UNIT 92 72 12 4 4 12 4
EADP C10 C23
EADP C39 C35
EADP C41 C2
EADP C9 C24

L.S. 13
PLAN  20
SIZE 0.36 0.35 0.34
TEMP -173.15
htab
BOND $H
fmap 2
acta 50
OMIT -1 3 4
OMIT 1 0 10
OMIT -3 -1 10
OMIT -3 3 1
OMIT -3 8 3
OMIT -4 -1 8
OMIT 2 0 12
OMIT -3 0 11
OMIT 9 5 9
OMIT -4 -3 7
OMIT 7 -4 5
REM <olex2.extras>
REM <HklSrc "%.\\SK260319_0m_5.hkl">
REM </olex2.extras>

WGHT    0.200000
BASF   0.45391
FVAR       0.33255
I001  5    0.386201    0.382948    0.513846    11.00000    0.03683    0.03311 =
         0.03241   -0.01132   -0.00001   -0.00961
I002  5    1.319850    0.112330   -0.049194    11.00000    0.03539    0.03249 =
         0.03281   -0.00508   -0.00500   -0.00541
CU03  4    0.545095    0.426602    0.562230    11.00000    0.02865    0.03004 =
         0.02981   -0.00728   -0.00428    0.00037
CU04  4    1.441625   -0.057376    0.062178    11.00000    0.04028    0.02857 =
         0.02588   -0.00783   -0.00204   -0.01388
CL1   3    0.823449    0.451657    0.707089    11.00000    0.08100    0.10925 =
         0.04169   -0.02282    0.01042   -0.05499
CL3   3    1.048779    0.437169    0.600062    11.00000    0.06639    0.11105 =
         0.05537   -0.01402   -0.00582    0.00824
CL2   3    0.867103    0.653952    0.597574    11.00000    0.08409    0.08095 =
         0.10775   -0.02376    0.00234   -0.03884
CL4   3    0.975107    0.233183    0.922434    11.00000    0.10533    0.11264 =
         0.13086   -0.06658   -0.03613   -0.00273
O2    7    1.560500   -0.165686    0.783804    11.00000    0.04919    0.03718 =
         0.04330   -0.01288   -0.01335   -0.01248
N4    6    0.711079    0.305780    0.543501    11.00000    0.00628    0.02469 =
         0.03763   -0.00729   -0.00119   -0.00025
O1    7   -0.164673    0.266290    1.255949    11.00000    0.02863    0.04177 =
         0.03652    0.00037   -0.00412   -0.00892
N3    6    0.417489    0.808407    1.048527    11.00000    0.04916    0.04359 =
         0.02689   -0.01092    0.00557   -0.03980
N1    6    0.466950    0.447359    0.671847    11.00000    0.02338    0.03192 =
         0.02869   -0.01018    0.00512   -0.00159
N6    6    1.368357   -0.039597    0.173740    11.00000    0.02337    0.02886 =
         0.02718   -0.01285   -0.00733    0.00519
C33   1    1.276883   -0.008259    0.326918    11.00000    0.02867    0.02218 =
         0.02675   -0.00064   -0.00269   -0.00884
C30   1    1.283574    0.002033    0.534019    11.00000    0.03243    0.01919 =
         0.02644   -0.00654   -0.00046   -0.00654
C31   1    1.238644    0.015747    0.406719    11.00000    0.01819    0.01392 =
         0.02104    0.00537    0.00154    0.00725
C5    1    1.321249   -0.019015    0.460171    11.00000    0.02923    0.03285 =
         0.02932   -0.01356    0.00783   -0.01081
AFIX  43
H5    2    1.404713   -0.057796    0.444988    11.00000   -1.20000
AFIX   0
N2    6    0.348029    0.555355    0.928934    11.00000    0.04603    0.01221 =
         0.03485   -0.00567   -0.01368   -0.01037

CL5   3    0.934510    0.039110    0.909284    11.00000    0.19503    0.12896 =
         0.36920   -0.09149   -0.13774   -0.01174
N32   6    1.122917    0.077338    0.422550    11.00000    0.03588    0.02476 =
         0.02986   -0.00880   -0.00342   -0.00876
C36   1    1.422454   -0.103875    0.234073    11.00000    0.02539    0.01437 =
         0.05584   -0.01343    0.00619   -0.00441
AFIX  43
H36   2    1.493833   -0.166009    0.226188    11.00000   -1.20000
AFIX   0
C8    1    0.179800    0.454764    1.035756    11.00000    0.01923    0.02296 =
         0.02077    0.00345    0.00215    0.00997
C11   1    0.349670    0.647753    1.017924    11.00000    0.03354    0.02172 =
         0.03357   -0.00953    0.00863   -0.02313
C41   1    1.503484   -0.128676    0.719350    11.00000    0.00901    0.02688 =
         0.04581   -0.01006    0.00037   -0.00961
C21   1    0.056275    0.327407    1.076046    11.00000    0.02790    0.02039 =
         0.02981   -0.01297    0.00034    0.00224
AFIX  43
H21   2    0.091290    0.308543    1.026831    11.00000   -1.20000
AFIX   0
C6    1    0.312343    0.489173    0.907767    11.00000    0.02433    0.04064 =
         0.01161   -0.00295   -0.00044   -0.00243
C29   1    1.159477    0.061614    0.552097    11.00000    0.02906    0.02824 =
         0.03536   -0.00442    0.00133   -0.00920
C26   1    0.874264    0.213092    0.455898    11.00000    0.04176    0.05181 =
         0.01558   -0.00676   -0.00203   -0.02122
AFIX  43
H26   2    0.903498    0.198989    0.404864    11.00000   -1.20000
AFIX   0
C2    1    0.334027    0.410004    0.792604    11.00000    0.00901    0.02688 =
         0.04581   -0.01006    0.00037   -0.00961
AFIX  43
H2    2    0.275714    0.373955    0.822113    11.00000   -1.20000
AFIX   0

CL6   3    1.087792    0.165492    0.783067    11.00000    0.24333    0.34506 =
         0.13890   -0.13457   -0.09774    0.13113
C10   1    0.306790    0.570388    1.000541    11.00000    0.04324    0.03666 =
         0.03735   -0.01066   -0.00666   -0.02471
C28   1    1.083174    0.101081    0.494291    11.00000    0.01900    0.03537 =
         0.03157   -0.01113    0.00044   -0.01149
C37   1    1.384728   -0.089864    0.310884    11.00000    0.02879    0.03039 =
         0.02091    0.00055   -0.00524   -0.01665
AFIX  43
H37   2    1.433772   -0.136855    0.351987    11.00000   -1.20000
AFIX   0
C40   1    1.408387   -0.026821    0.712524    11.00000    0.03126    0.01736 =
         0.04627   -0.00901    0.00119   -0.01240
AFIX  43
H40   2    1.389822    0.012101    0.751581    11.00000   -1.20000
AFIX   0
C19   1   -0.082350    0.308414    1.198272    11.00000    0.04169    0.05540 =
         0.01342   -0.01012   -0.00625   -0.01832
C42   1    1.532585   -0.183876    0.663166    11.00000    0.00595    0.02079 =
         0.03825   -0.01264   -0.00579    0.00301
AFIX  43
H42   2    1.600287   -0.252386    0.665940    11.00000   -1.20000
AFIX   0
C27   1    0.754135    0.278561    0.474422    11.00000    0.02191    0.05017 =
         0.03025   -0.02068    0.00032   -0.00328
AFIX  43
H27   2    0.700582    0.304964    0.436401    11.00000   -1.20000
AFIX   0
C16   1    0.089638    0.406564    1.091706    11.00000    0.04098    0.00999 =
         0.02401    0.00127   -0.00363   -0.00844
C38   1    1.364106   -0.039539    0.593888    11.00000    0.02007    0.02183 =
         0.02713   -0.00364    0.00042   -0.01282
C7    1    0.229181    0.437540    0.958487    11.00000    0.03594    0.02541 =
         0.01750   -0.01541    0.00282   -0.01033
AFIX  43
H7    2    0.205414    0.390770    0.941458    11.00000   -1.20000
AFIX   0
C43   1    1.463805   -0.140599    0.601696    11.00000    0.02953    0.01287 =
         0.02488    0.00014   -0.00318   -0.00071
AFIX  43
H43   2    1.485197   -0.181180    0.563291    11.00000   -1.20000
AFIX   0
C39   1    1.337746    0.021852    0.650199    11.00000    0.04188    0.01858 =
         0.03453   -0.00202   -0.01348   -0.00921
AFIX  43
H39   2    1.274383    0.093488    0.645791    11.00000   -1.20000
AFIX   0
C1    1    0.388485    0.398210    0.719458    11.00000    0.05136    0.04339 =
         0.03586   -0.01946   -0.00238   -0.03154
AFIX  43
H1    2    0.368911    0.350644    0.700494    11.00000   -1.20000
AFIX   0
C34   1    1.211452    0.060538    0.264383    11.00000    0.01431    0.05704 =
         0.02081   -0.02008    0.00108    0.00856
AFIX  43
H34   2    1.136100    0.118898    0.272125    11.00000   -1.20000
AFIX   0
C25   1    0.950799    0.168662    0.513288    11.00000    0.01368    0.01919 =
         0.03269   -0.00741   -0.00312   -0.00453
C9    1    0.224966    0.521884    1.055598    11.00000    0.03356    0.04762 =
         0.01890   -0.00645    0.00277   -0.02028
AFIX  43
H9    2    0.199084    0.534050    1.107264    11.00000   -1.20000
AFIX   0
C44   1    1.662330   -0.265450    0.789950    11.00000    0.04845    0.04345 =
         0.05535   -0.00627   -0.01527   -0.02962
AFIX 137
H44A  2    1.721044   -0.256443    0.740657    11.00000   -1.50000
H44B  2    1.637233   -0.329909    0.797382    11.00000   -1.50000
H44C  2    1.699902   -0.279741    0.836106    11.00000   -1.50000
AFIX   0

C46   1    0.898686    0.513911    0.608714    11.00000    0.06348    0.08966 =
         0.04048   -0.01456   -0.01338   -0.02121
AFIX  13
H46   2    0.864121    0.508700    0.566439    11.00000   -1.20000
AFIX   0

C13   1    0.368575    0.735150    1.106274    11.00000    0.03566    0.05890 =
         0.03486   -0.01136   -0.00037   -0.03570
AFIX  43
H13   2    0.355444    0.740219    1.159384    11.00000   -1.20000
AFIX   0
C0AA  1    0.497075    0.506129    0.703663    11.00000    0.04229    0.05438 =
         0.03586   -0.01461   -0.00924   -0.02204
AFIX  43
H0AA  2    0.559900    0.536066    0.673460    11.00000   -1.20000
AFIX   0
C20   1   -0.023071    0.277007    1.127581    11.00000    0.05616    0.03408 =
         0.04093   -0.01065   -0.02329   -0.01015
AFIX  43
H20   2   -0.038556    0.220516    1.115893    11.00000   -1.20000
AFIX   0
C23   1    0.785447    0.266972    0.596142    11.00000    0.04324    0.03666 =
         0.03735   -0.01066   -0.00666   -0.02471
AFIX  43
H23   2    0.753711    0.284698    0.645913    11.00000   -1.20000
AFIX   0
C17   1    0.033778    0.433851    1.163187    11.00000    0.03189    0.04222 =
         0.03211   -0.00920    0.00192   -0.01688
AFIX  43
H17   2    0.053672    0.486911    1.175961    11.00000   -1.20000
AFIX   0
C35   1    1.260637    0.040941    0.188631    11.00000    0.04188    0.01858 =
         0.03453   -0.00202   -0.01348   -0.00921
AFIX  43
H35   2    1.215537    0.086990    0.145372    11.00000   -1.20000
AFIX   0
C3    1    0.361509    0.473752    0.825590    11.00000    0.01369    0.02730 =
         0.03523   -0.00089   -0.00477   -0.00453
C24   1    0.905450    0.202790    0.584222    11.00000    0.03356    0.04762 =
         0.01890   -0.00645    0.00277   -0.02028
AFIX  43
H24   2    0.956757    0.181815    0.622637    11.00000   -1.20000
AFIX   0
C15   1    0.414775    0.715628    0.961286    11.00000    0.07457    0.05246 =
         0.03616   -0.02092   -0.00178   -0.03053
AFIX  43
H15   2    0.441335    0.707015    0.908599    11.00000   -1.20000
AFIX   0
C22   1   -0.206443    0.192639    1.235979    11.00000    0.05543    0.05538 =
         0.04866    0.00565    0.00395   -0.04426
AFIX 137
H22A  2   -0.230442    0.229273    1.182223    11.00000   -1.50000
H22B  2   -0.276260    0.179406    1.275510    11.00000   -1.50000
H22C  2   -0.140752    0.119645    1.236756    11.00000   -1.50000
AFIX   0
C14   1    0.440371    0.790021    0.977896    11.00000    0.07872    0.05639 =
         0.03337   -0.02615    0.01906   -0.05098
AFIX  43
H14   2    0.479713    0.835962    0.934547    11.00000   -1.20000
AFIX   0
C18   1   -0.048270    0.387283    1.215410    11.00000    0.04462    0.07216 =
         0.01818   -0.01212    0.00001   -0.01795
AFIX  43
H18   2   -0.083669    0.407390    1.264163    11.00000   -1.20000
AFIX   0
C4    1    0.445608    0.527200    0.775934    11.00000    0.05974    0.05865 =
         0.00957    0.00370   -0.00265   -0.03672
AFIX  43
H4    2    0.465839    0.576678    0.792510    11.00000   -1.20000
AFIX   0
C12   1    0.335462    0.654585    1.098271    11.00000    0.06185    0.04054 =
         0.02331   -0.00791    0.00573   -0.02657
AFIX  43
H12   2    0.304137    0.604586    1.143750    11.00000   -1.20000
AFIX   0

C45   1    1.042969    0.119521    0.886419    11.00000    0.03516    0.18845 =
         0.11269   -0.07866   -0.03450    0.00902
AFIX  13
H45   2    1.116363    0.067904    0.912920    11.00000   -1.20000
AFIX   0
HKLF 5


REM  1n.res in P-1
REM R1 =  0.1083 for    4960 Fo > 4sig(Fo)  and  0.2030 for all    8187 data
REM    556 parameters refined using      0 restraints

END

WGHT      0.2000      0.0000

REM Instructions for potential hydrogen bonds
HTAB C1 I001
EQIV $1 -x+1, -y+1, -z+1
HTAB C46 I001_$1
EQIV $5 -x+2, -y+1, -z+1
HTAB C46 Cl3_$5
HTAB C0AA I001_$1
EQIV $6 x-1, y+1, z
HTAB C14 O2_$6
EQIV $7 -x+1, -y+1, -z+2
HTAB C12 Cl1_$7
EQIV $8 x, y, z+1
HTAB C45 I002_$8

REM Highest difference peak  3.509,  deepest hole -1.858,  1-sigma level  0.364
Q1    1   0.4727  0.3641  0.4930  11.00000  0.05    3.51
Q2    1   1.3959  0.0828 -0.0649  11.00000  0.05    3.37
Q3    1   1.2377  0.1339 -0.0312  11.00000  0.05    3.25
Q4    1   0.3052  0.4059  0.5288  11.00000  0.05    2.73
Q5    1   0.4024  0.3649  0.5321  11.00000  0.05    2.59
Q6    1   0.3955  0.3769  0.5476  11.00000  0.05    2.56
Q7    1   1.2968  0.1261 -0.0633  11.00000  0.05    2.49
Q8    1   0.4946  0.3708  0.5373  11.00000  0.05    2.48
Q9    1   1.3214  0.1187 -0.0046  11.00000  0.05    2.33
Q10   1   1.1570  0.0599  0.9066  11.00000  0.05    2.28
Q11   1   0.4507  0.6516  1.0753  11.00000  0.05    2.17
Q12   1   0.4724  0.4415  0.5765  11.00000  0.05    2.13
Q13   1   1.3812  0.1574 -0.0365  11.00000  0.05    2.09
Q14   1   0.3571  0.3949  0.5082  11.00000  0.05    2.09
Q15   1   1.3615  0.1633 -0.0205  11.00000  0.05    2.05
Q16   1   0.5250  0.8424  1.0125  11.00000  0.05    2.04
Q17   1   1.5205 -0.0836  0.0404  11.00000  0.05    2.02
Q18   1   1.4802 -0.2040  0.3655  11.00000  0.05    1.97
Q19   1   0.5650  0.4117  0.5819  11.00000  0.05    1.88
Q20   1   1.3594 -0.0322  0.0839  11.00000  0.05    1.81
;
_shelx_res_checksum                75865
_shelx_hkl_file
;
   1   1   1 3673.27 84.0371  -2
   1   0   0 3673.27 84.0371   1
   2   2   2 1260.12 25.8089  -2
   2   0   0 1260.12 25.8089   1
   3   3   3 823.416 20.4104  -2
   3   0   0 823.416 20.4104   1
   4   4   4 642.856 18.4900  -2
   4   0   0 642.856 18.4900   1
   5   5   5 56.6630 70.3641  -2
   5   0   0 56.6630 70.3641   1
   6   0   0 -0.8245 3.42459   1
   7   0   0 -1.6540 3.95464   1
   8   0   0 218.554 15.6805   1
   9   0   0 8.97543 6.06886   1
   9   9   9 6.14700 37.7327  -2
  10   0   0 6.14700 37.7327   1
  10  10  10 73.5164 41.2869  -2
  11   0   0 73.5164 41.2869   1
  11  11  11 378.731 50.4425  -2
  12   0   0 378.731 50.4425   1
  12  12  12 372.565 49.4196  -2
  13   0   0 372.565 49.4196   1
  11  12  11 60.5173 29.1434  -2
 -12   1   0 60.5173 29.1434   1
  10  11  10 184.182 107.363  -2
 -11   1   0 184.182 107.363   1
   9  10   9 4.22800 37.9027  -2
 -10   1   0 4.22800 37.9027   1
  -9   1   0 67.7331 13.7644   1
  -8   1   0 126.329 13.6956   1
  -7   1   0 3.16544 4.33950   1
  -6   1   0 24.2983 4.34219   1
   5   6   5 1776.61 135.672  -2
  -5   1   0 1776.61 135.672   1
   4   5   4 1035.48 98.3353  -2
  -4   1   0 1035.48 98.3353   1
   3   4   3 228.025 12.9917  -2
  -3   1   0 228.025 12.9917   1
   2   3   2 1027.99 26.7658  -2
  -2   1   0 1027.99 26.7658   1
   1   2   1 333.859 14.6299  -2
  -1   1   0 333.859 14.6299   1
   0   1   0 60.2215 6.49769  -2
   0   1   0 60.2215 6.49769   1
   1   0   1 113.196 4.31077  -2
   1   1   0 113.196 4.31077   1
   3   2   3 225.542 11.2300  -2
   3   1   0 225.542 11.2300   1
   4   3   4 294.541 13.8463  -2
   4   1   0 294.541 13.8463   1
   5   4   5 195.168 14.1319  -2
   5   1   0 195.168 14.1319   1
   6   5   6 -11.832 63.0782  -2
   6   1   0 -11.832 63.0782   1
   7   6   7 592.167 91.5209  -2
   7   1   0 592.167 91.5209   1
   8   1   0 190.272 14.9078   1
   9   1   0 300.855 18.4375   1
  10   1   0 11.9636 7.98257   1
  10   9  10 255.468 45.4206  -2
  11   1   0 255.468 45.4206   1
  11  10  11 545.346 38.3411  -2
  12   1   0 545.346 38.3411   1
  12  11  12 190.574 42.1321  -2
  13   1   0 190.574 42.1321   1
  11  13  11 101.978 29.7543  -2
 -12   2   0 101.978 29.7543   1
  10  12  10 27.9794 26.5500  -2
 -11   2   0 27.9794 26.5500   1
   9  11   9 50.8618 26.0341  -2
 -10   2   0 50.8618 26.0341   1
   8  10   8 46.5511 37.8173  -2
  -9   2   0 46.5511 37.8173   1
  -8   2   0 516.145 20.8738   1
  -7   2   0 701.306 22.5169   1
  -6   2   0 722.701 21.6029   1
  -5   2   0 16.4236 3.52072   1
   4   6   4 730.778 37.5602  -2
  -4   2   0 730.778 37.5602   1
   3   5   3 2122.32 73.8348  -2
  -3   2   0 2122.32 73.8348   1
   2   4   2 842.955 35.5282  -2
  -2   2   0 842.955 35.5282   1
   1   3   1 679.666 26.2313  -2
  -1   2   0 679.666 26.2313   1
   0   2   0 5935.27 152.334  -2
   0   2   0 5935.27 152.334   1
   1  -1   1 2062.90 31.0477  -2
   1   2   0 2062.90 31.0477   1
   2   0   2 156.311 7.59021  -2
   2   2   0 156.311 7.59021   1
   3   1   3 4389.66 88.1894  -2
   3   2   0 4389.66 88.1894   1
   4   2   4 596.908 22.5701  -2
   4   2   0 596.908 22.5701   1
   5   3   5 69.9196 16.0811  -2
   5   2   0 69.9196 16.0811   1
   6   4   6 1240.21 49.1361  -2
   6   2   0 1240.21 49.1361   1
   7   5   7 1073.31 96.0382  -2
   7   2   0 1073.31 96.0382   1
   8   2   0 35.4870 7.97810   1
   9   2   0 125.764 17.9930   1
  10   2   0 256.042 22.7781   1
  11   2   0 133.109 26.8598   1
  11   9  11 206.574 32.3733  -2
  12   2   0 206.574 32.3733   1
  12  10  12 140.662 43.4405  -2
  13   2   0 140.662 43.4405   1
  11  14  11 198.422 46.7055  -2
 -12   3   0 198.422 46.7055   1
  10  13  10 234.462 32.3407  -2
 -11   3   0 234.462 32.3407   1
   9  12   9 122.804 27.3501  -2
 -10   3   0 122.804 27.3501   1
   8  11   8 506.897 50.7604  -2
  -9   3   0 506.897 50.7604   1
  -8   3   0 393.196 19.4657   1
  -7   3   0 5.33035 5.46777   1
  -6   3   0 35.4224 5.27675   1
  -5   3   0 26.7177 4.06127   1
   4   7   4 206.235 79.4529  -2
  -4   3   0 206.235 79.4529   1
   3   6   3 109.088 18.5773  -2
  -3   3   0 109.088 18.5773   1
   2   5   2 79.9780 21.1583  -2
  -2   3   0 79.9780 21.1583   1
   1   4   1 2328.14 68.3441  -2
  -1   3   0 2328.14 68.3441   1
   0   3   0 4.41633 3.25598   1
   1  -2   1 2682.05 57.4896  -2
   1   3   0 2682.05 57.4896   1
   2  -1   2 684.751 16.0540  -2
   2   3   0 684.751 16.0540   1
   3   0   3 2456.47 43.6626  -2
   3   3   0 2456.47 43.6626   1
   4   1   4 3948.11 81.5234  -2
   4   3   0 3948.11 81.5234   1
   5   2   5 2046.62 48.5425  -2
   5   3   0 2046.62 48.5425   1
   6   3   6 1457.83 40.0026  -2
   6   3   0 1457.83 40.0026   1
   7   4   7 265.676 27.8568  -2
   7   3   0 265.676 27.8568   1
   8   3   0 28.1309 7.26599   1
   9   3   0 51.0089 8.97031   1
  10   3   0 29.9994 9.48319   1
  10   7  10 311.173 45.5120  -2
  11   3   0 311.173 45.5120   1
  11   8  11 130.559 49.7617  -2
  12   3   0 130.559 49.7617   1
  12   9  12 62.8840 50.1166  -2
  13   3   0 62.8840 50.1166   1
  10  14  10 61.3117 31.6556  -2
 -11   4   0 61.3117 31.6556   1
   9  13   9 64.1680 28.4380  -2
 -10   4   0 64.1680 28.4380   1
   8  12   8 63.2738 26.8675  -2
  -9   4   0 63.2738 26.8675   1
  -8   4   0 2.33840 6.44045   1
  -7   4   0 76.1061 12.5272   1
  -6   4   0 160.918 13.2205   1
  -5   4   0 -4.2930 3.41127   1
   4   8   4 242.307 84.0477  -2
  -4   4   0 242.307 84.0477   1
   3   7   3 1254.23 112.085  -2
  -3   4   0 1254.23 112.085   1
   2   6   2 796.938 43.5998  -2
  -2   4   0 796.938 43.5998   1
   1   5   1 1248.38 45.9854  -2
  -1   4   0 1248.38 45.9854   1
   0   4   0 1288.06 45.3557  -2
   0   4   0 1288.06 45.3557   1
   1  -3   1 679.262 23.6795  -2
   1   4   0 679.262 23.6795   1
   2  -2   2 2878.92 44.3488  -2
   2   4   0 2878.92 44.3488   1
   3  -1   3 243.564 10.7500  -2
   3   4   0 243.564 10.7500   1
   4   0   4 780.787 18.8985  -2
   4   4   0 780.787 18.8985   1
   5   1   5 233.545 15.9216  -2
   5   4   0 233.545 15.9216   1
   6   2   6 757.958 26.4879  -2
   6   4   0 757.958 26.4879   1
   7   3   7 29.7311 16.7910  -2
   7   4   0 29.7311 16.7910   1
   8   4   8 4.35950 22.2226  -2
   8   4   0 4.35950 22.2226   1
   9   5   9 485.263 46.2926  -2
   9   4   0 485.263 46.2926   1
  10   4   0 114.022 19.7361   1
  11   4   0 72.1173 14.3728   1
  11   7  11 262.663 45.0174  -2
  12   4   0 262.663 45.0174   1
  13   4   0 126.083 29.8143   1
  13   9  13 107.930 48.4784  -2
  14   4   0 107.930 48.4784   1
   9  14   9 -6.0127 29.9408  -2
 -10   5   0 -6.0127 29.9408   1
   8  13   8 110.883 29.1480  -2
  -9   5   0 110.883 29.1480   1
   7  12   7 359.882 46.2137  -2
  -8   5   0 359.882 46.2137   1
  -7   5   0 16.0747 7.05731   1
  -6   5   0 34.4497 5.86100   1
  -5   5   0 191.414 16.5657   1
  -4   5   0 32.1684 6.20014   1
   3   8   3 1038.82 107.330  -2
  -3   5   0 1038.82 107.330   1
   2   7   2 3425.61 122.185  -2
  -2   5   0 3425.61 122.185   1
   1   6   1 1977.02 65.4966  -2
  -1   5   0 1977.02 65.4966   1
   0   5   0 83.1665 24.8020  -2
   0   5   0 83.1665 24.8020   1
   1  -4   1 321.781 17.3811  -2
   1   5   0 321.781 17.3811   1
   2  -3   2 979.556 19.0320  -2
   2   5   0 979.556 19.0320   1
   3  -2   3 1339.36 28.3244  -2
   3   5   0 1339.36 28.3244   1
   4  -1   4 2240.93 42.7498  -2
   4   5   0 2240.93 42.7498   1
   5   0   5 2730.07 50.6998  -2
   5   5   0 2730.07 50.6998   1
   6   1   6 801.186 30.8904  -2
   6   5   0 801.186 30.8904   1
   7   2   7 -9.4920 15.6730  -2
   7   5   0 -9.4920 15.6730   1
   8   3   8 249.370 23.1356  -2
   8   5   0 249.370 23.1356   1
   9   4   9 222.398 42.5353  -2
   9   5   0 222.398 42.5353   1
  10   5   0 -7.7275 10.6423   1
  11   5   0 59.2624 18.2143   1
  12   5   0 98.3506 21.1050   1
  13   7  12 171.316 33.3718  -2
  13   5   0 171.316 33.3718   1
  13   8  13 -27.024 53.7462  -2
  14   5   0 -27.024 53.7462   1
   8  14   8 54.8127 40.8505  -2
  -9   6   0 54.8127 40.8505   1
   7  13   7 172.237 30.1181  -2
  -8   6   0 172.237 30.1181   1
  -7   6   0 454.242 27.7246   1
   5  11   5 -17.456 33.2757  -2
  -6   6   0 -17.456 33.2757   1
  -5   6   0 40.3877 7.27553   1
  -4   6   0 278.111 19.8765   1
  -3   6   0 5.71782 5.13721   1
   2   8   2 332.560 83.5940  -2
  -2   6   0 332.560 83.5940   1
   1   7   1 998.740 54.7791  -2
  -1   6   0 998.740 54.7791   1
   0   6   0 1540.83 67.9975  -2
   0   6   0 1540.83 67.9975   1
   1  -5   1 1100.59 33.4727  -2
   1   6   0 1100.59 33.4727   1
   2  -4   2 67.8739 8.24207  -2
   2   6   0 67.8739 8.24207   1
   3  -3   3 749.396 17.7277  -2
   3   6   0 749.396 17.7277   1
   4  -2   4 1733.64 35.9659  -2
   4   6   0 1733.64 35.9659   1
   5  -1   5 55.2927 10.9048  -2
   5   6   0 55.2927 10.9048   1
   6   0   6 452.352 16.8112  -2
   6   6   0 452.352 16.8112   1
   7   1   7 625.516 27.3331  -2
   7   6   0 625.516 27.3331   1
   8   2   8 16.9864 19.8738  -2
   8   6   0 16.9864 19.8738   1
   9   3   9 231.674 26.9265  -2
   9   6   0 231.674 26.9265   1
  10   4  10 421.724 50.7367  -2
  10   6   0 421.724 50.7367   1
  11   5  10 138.670 43.9935  -2
  11   6   0 138.670 43.9935   1
  12   6  11 46.3802 77.8041  -2
  12   6   0 46.3802 77.8041   1
  13   6  12 195.897 36.1478  -2
  13   6   0 195.897 36.1478   1
  13   7  12 5.68673 45.1953  -2
  13   6   0 5.68673 45.1953   1
  14   6   0 -4.1421 18.8041   1
  -7   7   0 6.37833 7.30044   1
   5  12   5 -22.388 35.4208  -2
  -6   7   0 -22.388 35.4208   1
   4  11   4 -77.051 105.327  -2
  -5   7   0 -77.051 105.327   1
  -4   7   0 4.51756 6.17786   1
  -3   7   0 58.8500 12.2178   1
  -2   7   0 593.126 26.1795   1
   1   8   1 618.912 89.9348  -2
  -1   7   0 618.912 89.9348   1
   0   7   0 -65.455 64.9512  -2
   0   7   0 -65.455 64.9512   1
   1  -6   1 1644.62 45.5452  -2
   1   7   0 1644.62 45.5452   1
   2  -5   2 2609.68 59.3351  -2
   2   7   0 2609.68 59.3351   1
   3  -4   3 488.052 15.2116  -2
   3   7   0 488.052 15.2116   1
   4  -3   4 1339.68 31.2552  -2
   4   7   0 1339.68 31.2552   1
   5  -2   5 722.360 22.2502  -2
   5   7   0 722.360 22.2502   1
   6  -1   6 196.597 14.9417  -2
   6   7   0 196.597 14.9417   1
   7   0   7 -6.5438 15.1998  -2
   7   7   0 -6.5438 15.1998   1
   8   1   8 231.711 24.1695  -2
   8   7   0 231.711 24.1695   1
   9   2   9 139.747 26.7994  -2
   9   7   0 139.747 26.7994   1
  10   3  10 184.814 43.7808  -2
  10   7   0 184.814 43.7808   1
  12   5  11 -15.916 43.9726  -2
  12   7   0 -15.916 43.9726   1
  13   6  12 99.0619 83.3112  -2
  13   7   0 99.0619 83.3112   1
   5  13   5 277.779 45.9394  -2
  -6   8   0 277.779 45.9394   1
   4  12   4 195.696 42.1035  -2
  -5   8   0 195.696 42.1035   1
   3  11   3 216.219 113.315  -2
  -4   8   0 216.219 113.315   1
   2  10   2 537.118 115.652  -2
  -3   8   0 537.118 115.652   1
  -2   8   0 272.073 19.7394   1
   1   9   1 -25.054 82.5286  -2
  -1   8   0 -25.054 82.5286   1
   0   8   0 5.95047 75.9588  -2
   0   8   0 5.95047 75.9588   1
   1  -7   1 38.1060 31.3272  -2
   1   8   0 38.1060 31.3272   1
   2  -6   2 538.351 19.7835  -2
   2   8   0 538.351 19.7835   1
   3  -5   3 691.244 23.9682  -2
   3   8   0 691.244 23.9682   1
   4  -4   4 218.584 16.1448  -2
   4   8   0 218.584 16.1448   1
   5  -3   5 -4.5852 18.2240  -2
   5   8   0 -4.5852 18.2240   1
   6  -2   6 24.9634 13.9343  -2
   6   8   0 24.9634 13.9343   1
   7  -1   7 19.2493 14.1930  -2
   7   8   0 19.2493 14.1930   1
   8   0   8 329.518 25.0048  -2
   8   8   0 329.518 25.0048   1
   9   1   9 814.168 37.8212  -2
   9   8   0 814.168 37.8212   1
  10   2  10 834.160 65.0640  -2
  10   8   0 834.160 65.0640   1
  11   3  10 295.107 53.3182  -2
  11   8   0 295.107 53.3182   1
  12   4  11 -37.221 47.8084  -2
  12   8   0 -37.221 47.8084   1
  13   5  12 31.1847 52.6817  -2
  13   8   0 31.1847 52.6817   1
   4  13   4 352.528 48.1556  -2
  -5   9   0 352.528 48.1556   1
  -4   9   0 11.1910 7.49914   1
   2  11   2 78.0397 109.344  -2
  -3   9   0 78.0397 109.344   1
  -2   9   0 324.326 22.9840   1
  -1   9   0 114.594 18.2601   1
   0   9   0 -1.0258 5.93296   1
   1  -8   1 17.6011 83.6630  -2
   1   9   0 17.6011 83.6630   1
   2  -7   2 23.0969 12.7265  -2
   2   9   0 23.0969 12.7265   1
   3  -6   3 18.5523 10.9928  -2
   3   9   0 18.5523 10.9928   1
   4  -5   4 1200.20 40.6481  -2
   4   9   0 1200.20 40.6481   1
   5  -4   5 1388.70 35.6400  -2
   5   9   0 1388.70 35.6400   1
   6  -3   6 794.903 27.5313  -2
   6   9   0 794.903 27.5313   1
   7  -2   7 56.0319 16.0215  -2
   7   9   0 56.0319 16.0215   1
   8  -1   8 337.481 28.7341  -2
   8   9   0 337.481 28.7341   1
   9   0   9 171.265 24.4895  -2
   9   9   0 171.265 24.4895   1
  10   1  10 59.2926 58.1525  -2
  10   9   0 59.2926 58.1525   1
  -3  10   0 6.60393 7.63750   1
   1  11   1 20.2011 108.681  -2
  -2  10   0 20.2011 108.681   1
  -1  10   0 -0.7336 7.41851   1
   0  10   0 -0.2251 7.40462   1
   1  -9   1 4.00441 94.4065  -2
   1  10   0 4.00441 94.4065   1
   2  -8   2 266.815 36.5389  -2
   2  10   0 266.815 36.5389   1
   3  -7   3 1066.61 33.9165  -2
   3  10   0 1066.61 33.9165   1
   4  -6   4 254.173 23.9954  -2
   4  10   0 254.173 23.9954   1
   5  -5   5 67.7901 20.4865  -2
   5  10   0 67.7901 20.4865   1
   6  -4   6 174.351 20.1966  -2
   6  10   0 174.351 20.1966   1
   7  -3   7 104.673 20.2393  -2
   7  10   0 104.673 20.2393   1
   8  -2   8 6.49759 22.8528  -2
   8  10   0 6.49759 22.8528   1
   9  -1   9 72.5062 27.6216  -2
   9  10   0 72.5062 27.6216   1
  10   0  10 124.011 29.5263  -2
  10  10   0 124.011 29.5263   1
  13  10   0 7.10673 19.7448   1
   2  13   2 104.982 49.0297  -2
  -3  11   0 104.982 49.0297   1
   1  12   1 116.434 127.981  -2
  -2  11   0 116.434 127.981   1
   0  11   0 42.5397 112.364  -2
  -1  11   0 42.5397 112.364   1
   0  11   0 -4.7435 7.89538   1
   1  11   0 231.930 23.7725   1
   2  -9   2 1118.24 63.7336  -2
   2  11   0 1118.24 63.7336   1
   3  -8   3 189.757 44.9725  -2
   3  11   0 189.757 44.9725   1
   4  -7   4 166.653 23.7290  -2
   4  11   0 166.653 23.7290   1
   5  -6   5 366.459 27.9468  -2
   5  11   0 366.459 27.9468   1
   6  -5   6 365.035 118.560  -2
   6  11   0 365.035 118.560   1
   7  -4   7 220.841 25.5355  -2
   7  11   0 220.841 25.5355   1
   8  -3   8 70.1382 31.1910  -2
   8  11   0 70.1382 31.1910   1
   9  -2   9 -10.259 28.4908  -2
   9  11   0 -10.259 28.4908   1
  10  -1  10 134.252 48.9357  -2
  10  11   0 134.252 48.9357   1
  11   0  11 69.1160 38.0617  -2
  11  11   0 69.1160 38.0617   1
  12   1  12 -49.648 56.8708  -2
  12  11   0 -49.648 56.8708   1
   2  14   2 -120.21 142.630  -2
  -3  12   0 -120.21 142.630   1
   0  12   0 -41.917 124.434  -2
  -1  12   0 -41.917 124.434   1
   2 -11   1 148.598 49.8766  -2
   1  12   0 148.598 49.8766   1
   3 -10   2 35.6130 47.4811  -2
   2  12   0 35.6130 47.4811   1
   3  12   0 -20.343 8.31074   1
   4  12   0 -8.3332 8.72663   1
   5  -7   5 125.003 25.6826  -2
   5  12   0 125.003 25.6826   1
   6  -6   6 362.882 30.9247  -2
   6  12   0 362.882 30.9247   1
   7  -5   7 162.833 25.2405  -2
   7  12   0 162.833 25.2405   1
   8  -4   8 -17.420 31.0680  -2
   8  12   0 -17.420 31.0680   1
   9  -3   9 58.9517 34.5270  -2
   9  12   0 58.9517 34.5270   1
  10  -2  10 216.801 54.3624  -2
  10  12   0 216.801 54.3624   1
  11  -1  11 -40.969 51.9482  -2
  11  12   0 -40.969 51.9482   1
   3 -11   2 297.231 54.2302  -2
   2  13   0 297.231 54.2302   1
   4 -10   3 183.487 51.8854  -2
   3  13   0 183.487 51.8854   1
   5  -9   4 108.103 48.8803  -2
   4  13   0 108.103 48.8803   1
   5  13   0 16.5388 15.0760   1
   6  13   0 28.1176 68.1281   1
   7  -6   7 164.618 40.8255  -2
   7  13   0 164.618 40.8255   1
   8  -5   8 294.106 39.6954  -2
   8  13   0 294.106 39.6954   1
   9  -4   9 167.327 41.7160  -2
   9  13   0 167.327 41.7160   1
   3 -12   2 263.164 56.7327  -2
   2  14   0 263.164 56.7327   1
   4 -11   3 568.568 62.4869  -2
   3  14   0 568.568 62.4869   1
   5 -10   4 516.216 60.6825  -2
   4  14   0 516.216 60.6825   1
   5  14   0 19.4776 16.0441   1
   6  14   0 -5.7395 13.8778   1
   7  14   0 37.1461 18.6720   1
   8  -6   8 -20.894 43.9663  -2
   8  14   0 -20.894 43.9663   1
   9  -5   9 -51.692 47.7163  -2
   9  14   0 -51.692 47.7163   1
   8  -6   9 69.0566 45.4237  -2
  -8 -14   1 69.0566 45.4237   1
  -7 -14   1 -12.421 16.7240   1
  -6 -14   1 100.482 119.329   1
   4 -11   4 192.428 55.5927  -2
  -3 -14   1 192.428 55.5927   1
   3 -12   3 126.978 53.7584  -2
  -2 -14   1 126.978 53.7584   1
  -1 -14   1 9.55912 18.9242   1
  10  -3  11 76.7955 49.0891  -2
 -10 -13   1 76.7955 49.0891   1
   9  -4  10 206.310 52.8849  -2
  -9 -13   1 206.310 52.8849   1
   8  -5   9 104.768 35.7682  -2
  -8 -13   1 104.768 35.7682   1
   7  -6   8 32.4004 26.0778  -2
  -7 -13   1 32.4004 26.0778   1
   6  -7   7 -31.308 33.1103  -2
  -6 -13   1 -31.308 33.1103   1
   5  -8   6 76.3461 129.115  -2
  -5 -13   1 76.3461 129.115   1
  -4 -13   1 30.4599 16.7912   1
   4 -10   4 1051.85 73.8622  -2
  -3 -13   1 1051.85 73.8622   1
   3 -11   3 583.008 62.1854  -2
  -2 -13   1 583.008 62.1854   1
  -1 -13   1 -34.183 67.6364   1
  11  -1  12 -32.616 36.9964  -2
 -11 -12   1 -32.616 36.9964   1
  10  -2  11 -16.087 48.9309  -2
 -10 -12   1 -16.087 48.9309   1
   9  -3  10 6.53956 32.5338  -2
  -9 -12   1 6.53956 32.5338   1
   8  -4   9 109.872 32.6792  -2
  -8 -12   1 109.872 32.6792   1
   7  -5   8 143.839 23.9582  -2
  -7 -12   1 143.839 23.9582   1
   6  -6   7 38.0444 24.5124  -2
  -6 -12   1 38.0444 24.5124   1
   5  -7   6 116.832 32.3106  -2
  -5 -12   1 116.832 32.3106   1
   4  -8   5 52.3058 123.525  -2
  -4 -12   1 52.3058 123.525   1
   3  -9   4 18.4721 126.082  -2
  -3 -12   1 18.4721 126.082   1
  -2 -12   1 72.1688 30.6148   1
  -1 -12   1 66.0805 29.8011   1
   1 -11   2 -82.444 111.974  -2
   0 -12   1 -82.444 111.974   1
   1  13   0 -112.03 131.748  -2
   2 -12   1 -112.03 131.748   1
  11   0  12 57.2726 54.5365  -2
 -11 -11   1 57.2726 54.5365   1
  10  -1  11 198.256 32.8179  -2
 -10 -11   1 198.256 32.8179   1
   9  -2  10 10.8792 30.3892  -2
  -9 -11   1 10.8792 30.3892   1
   8  -3   9 22.5796 24.8675  -2
  -8 -11   1 22.5796 24.8675   1
   7  -4   8 346.189 26.2098  -2
  -7 -11   1 346.189 26.2098   1
   6  -5   7 395.941 27.1739  -2
  -6 -11   1 395.941 27.1739   1
   5  -6   6 40.4687 27.9699  -2
  -5 -11   1 40.4687 27.9699   1
   4  -7   5 99.6654 22.5550  -2
  -4 -11   1 99.6654 22.5550   1
   3  -8   4 173.296 16.3249  -2
  -3 -11   1 173.296 16.3249   1
   2  -9   3 97.6942 118.939  -2
  -2 -11   1 97.6942 118.939   1
   1 -10   2 15.8486 117.206  -2
  -1 -11   1 15.8486 117.206   1
   0 -11   1 39.9941 11.3238   1
   0 -11   1 -24.038 107.823  -2
   1 -11   1 -24.038 107.823   1
   2 -11   1 22.5452 16.9379   1
   2  13   1 -39.074 135.584  -2
   3 -11   1 -39.074 135.584   1
   3  14   2 44.1674 147.572  -2
   4 -11   1 44.1674 147.572   1
  10   0  11 17.4801 35.1963  -2
 -10 -10   1 17.4801 35.1963   1
   9  -1  10 -2.8555 24.4081  -2
  -9 -10   1 -2.8555 24.4081   1
   8  -2   9 52.4358 24.4796  -2
  -8 -10   1 52.4358 24.4796   1
   7  -3   8 58.4158 18.0209  -2
  -7 -10   1 58.4158 18.0209   1
   6  -4   7 331.567 22.6313  -2
  -6 -10   1 331.567 22.6313   1
   5  -5   6 119.241 20.4825  -2
  -5 -10   1 119.241 20.4825   1
   4  -6   5 188.357 16.2634  -2
  -4 -10   1 188.357 16.2634   1
   3  -7   4 365.211 17.3754  -2
  -3 -10   1 365.211 17.3754   1
   2  -8   3 436.784 21.4101  -2
  -2 -10   1 436.784 21.4101   1
   1  -9   2 623.273 43.6253  -2
  -1 -10   1 623.273 43.6253   1
   0 -10   1 -12.075 106.067  -2
   0 -10   1 -12.075 106.067   1
   1 -10   1 587.082 31.7630   1
   1  11   0 223.115 116.913  -2
   2 -10   1 223.115 116.913   1
   2  12   1 -102.96 117.271  -2
   3 -10   1 -102.96 117.271   1
   4  14   3 -123.95 134.083  -2
   5 -10   1 -123.95 134.083   1
 -13  -9   1 26.2059 18.0373   1
   9   0  10 389.280 32.0524  -2
  -9  -9   1 389.280 32.0524   1
   8  -1   9 155.908 22.7429  -2
  -8  -9   1 155.908 22.7429   1
   7  -2   8 314.685 20.3611  -2
  -7  -9   1 314.685 20.3611   1
   6  -3   7 263.072 19.8167  -2
  -6  -9   1 263.072 19.8167   1
   5  -4   6 222.182 19.1716  -2
  -5  -9   1 222.182 19.1716   1
   4  -5   5 262.197 15.9775  -2
  -4  -9   1 262.197 15.9775   1
   3  -6   4 1116.23 26.2474  -2
  -3  -9   1 1116.23 26.2474   1
   2  -7   3 250.194 13.6749  -2
  -2  -9   1 250.194 13.6749   1
   1  -8   2 57.7665 25.5577  -2
  -1  -9   1 57.7665 25.5577   1
   0  -9   1 262.401 21.4511   1
   1  -9   1 146.608 19.5200   1
   2  -9   1 53.4155 14.5410   1
   2  11   1 -10.127 106.473  -2
   3  -9   1 -10.127 106.473   1
   4  -9   1 20.6835 15.4189   1
   4  13   3 21.8218 41.2598  -2
   5  -9   1 21.8218 41.2598   1
  13   5  13 -26.433 45.0023  -2
 -13  -8   1 -26.433 45.0023   1
  12   4  12 -71.198 47.4178  -2
 -12  -8   1 -71.198 47.4178   1
  11   3  11 30.8325 46.2335  -2
 -11  -8   1 30.8325 46.2335   1
   9   1  10 43.4798 26.5533  -2
  -9  -8   1 43.4798 26.5533   1
   8   0   9 72.2277 23.5147  -2
  -8  -8   1 72.2277 23.5147   1
   7  -1   8 66.3217 14.7809  -2
  -7  -8   1 66.3217 14.7809   1
   6  -2   7 923.854 27.8160  -2
  -6  -8   1 923.854 27.8160   1
   5  -3   6 1431.88 34.7956  -2
  -5  -8   1 1431.88 34.7956   1
   4  -4   5 1608.11 31.8483  -2
  -4  -8   1 1608.11 31.8483   1
   3  -5   4 79.5448 10.4098  -2
  -3  -8   1 79.5448 10.4098   1
   2  -6   3 253.627 12.4070  -2
  -2  -8   1 253.627 12.4070   1
   1  -7   2 191.875 21.0958  -2
  -1  -8   1 191.875 21.0958   1
   0  -8   1 3.80466 5.62098   1
   1   9   0 -78.800 87.2515  -2
   1  -8   1 -78.800 87.2515   1
   2  -8   1 1.03854 5.86085   1
   3  -8   1 61.0205 13.4012   1
   4  -8   1 4.45760 6.81457   1
   5  -8   1 20.6707 8.14798   1
   5  13   4 141.792 41.7811  -2
   6  -8   1 141.792 41.7811   1
  13   5  13 170.586 41.4155  -2
 -13  -7   1 170.586 41.4155   1
  12   5  12 -51.693 37.2783  -2
 -12  -7   1 -51.693 37.2783   1
  11   4  11 510.170 56.3723  -2
 -11  -7   1 510.170 56.3723   1
  10   3  11 976.520 67.8307  -2
 -10  -7   1 976.520 67.8307   1
   9   2  10 774.536 36.9138  -2
  -9  -7   1 774.536 36.9138   1
   8   1   9 275.584 26.1304  -2
  -8  -7   1 275.584 26.1304   1
   7   0   8 309.277 23.6636  -2
  -7  -7   1 309.277 23.6636   1
   6  -1   7 568.359 20.5918  -2
  -6  -7   1 568.359 20.5918   1
   5  -2   6 137.589 29.8905  -2
  -5  -7   1 137.589 29.8905   1
   4  -3   5 311.925 15.7867  -2
  -4  -7   1 311.925 15.7867   1
   3  -4   4 259.424 12.8731  -2
  -3  -7   1 259.424 12.8731   1
   2  -5   3 299.686 12.4892  -2
  -2  -7   1 299.686 12.4892   1
   1  -6   2 98.4319 8.90863  -2
  -1  -7   1 98.4319 8.90863   1
   0  -7   1 45.2308 29.4306  -2
   0  -7   1 45.2308 29.4306   1
   1  -7   1 0.73139 4.54362   1
   2  -7   1 102.851 26.4780   1
   3  -7   1 549.268 26.5124   1
   4  -7   1 368.812 23.3578   1
   4  11   3 -29.039 108.332  -2
   5  -7   1 -29.039 108.332   1
   5  12   4 425.590 49.9514  -2
   6  -7   1 425.590 49.9514   1
   7  -7   1 399.192 54.3645   1
 -13  -6   1 59.9971 20.5285   1
 -12  -6   1 182.601 32.4712   1
  11   5  11 34.0982 70.8940  -2
 -11  -6   1 34.0982 70.8940   1
 -10  -6   1 5.82492 9.13477   1
   9   3  10 7.85582 32.6159  -2
  -9  -6   1 7.85582 32.6159   1
   8   2   9 338.469 25.9430  -2
  -8  -6   1 338.469 25.9430   1
   7   1   8 34.7396 18.3475  -2
  -7  -6   1 34.7396 18.3475   1
   6   0   7 115.287 12.9518  -2
  -6  -6   1 115.287 12.9518   1
   5  -1   6 373.742 15.2495  -2
  -5  -6   1 373.742 15.2495   1
   4  -2   5 420.212 18.7984  -2
  -4  -6   1 420.212 18.7984   1
   3  -3   4 -9.8803 8.39447  -2
  -3  -6   1 -9.8803 8.39447   1
   2  -4   3 1955.94 39.9222  -2
  -2  -6   1 1955.94 39.9222   1
   1  -5   2 2384.25 62.6936  -2
  -1  -6   1 2384.25 62.6936   1
   0  -6   1 -29.370 26.1045  -2
   0  -6   1 -29.370 26.1045   1
   1   7   0 1990.52 70.2682  -2
   1  -6   1 1990.52 70.2682   1
   2   8   1 1656.50 130.037  -2
   2  -6   1 1656.50 130.037   1
   3  -6   1 314.539 19.2664   1
   4  -6   1 -1.0995 5.58368   1
   5  -6   1 171.084 17.8666   1
   6  -6   1 10.8267 5.67150   1
   7  -6   1 62.6369 10.1893   1
   8  -6   1 9.67422 7.95289   1
 -13  -5   1 60.5109 45.9800   1
 -12  -5   1 82.6694 20.2887   1
 -11  -5   1 23.1821 17.0016   1
 -10  -5   1 97.8800 15.7859   1
   9   4  10 -54.288 39.2685  -2
  -9  -5   1 -54.288 39.2685   1
   8   3   9 67.2826 28.2441  -2
  -8  -5   1 67.2826 28.2441   1
   7   2   8 478.374 25.0334  -2
  -7  -5   1 478.374 25.0334   1
   6   1   7 643.224 25.1145  -2
  -6  -5   1 643.224 25.1145   1
   5   0   6 307.900 17.8944  -2
  -5  -5   1 307.900 17.8944   1
   4  -1   5 790.649 17.7322  -2
  -4  -5   1 790.649 17.7322   1
   3  -2   4 782.447 17.1191  -2
  -3  -5   1 782.447 17.1191   1
   2  -3   3 63.7365 7.74952  -2
  -2  -5   1 63.7365 7.74952   1
   1  -4   2 1258.81 26.6767  -2
  -1  -5   1 1258.81 26.6767   1
   0  -5   1 6369.03 171.672  -2
   0  -5   1 6369.03 171.672   1
   1   6   0 1247.66 49.6344  -2
   1  -5   1 1247.66 49.6344   1
   2   7   1 207.482 32.4933  -2
   2  -5   1 207.482 32.4933   1
   3   8   2 187.027 80.8243  -2
   3  -5   1 187.027 80.8243   1
   4   9   3 359.309 98.8539  -2
   4  -5   1 359.309 98.8539   1
   5  -5   1 127.605 15.6756   1
   6  -5   1 12.7997 5.29128   1
   7  -5   1 262.187 17.5740   1
   8  -5   1 80.7877 18.5219   1
   8  13   7 54.2342 37.6886  -2
   9  -5   1 54.2342 37.6886   1
 -13  -4   1 25.5733 44.5323   1
  11   7  12 328.512 45.2028  -2
 -12  -4   1 328.512 45.2028   1
 -11  -4   1 -3.1994 15.1533   1
 -10  -4   1 10.0202 11.2313   1
  -9  -4   1 307.795 22.1052   1
  -8  -4   1 98.2206 15.7518   1
   7   3   8 18.8227 41.0382  -2
  -7  -4   1 18.8227 41.0382   1
   6   2   7 820.647 28.0680  -2
  -6  -4   1 820.647 28.0680   1
   5   1   6 4586.61 95.8042  -2
  -5  -4   1 4586.61 95.8042   1
   4   0   5 1946.01 37.3984  -2
  -4  -4   1 1946.01 37.3984   1
   3  -1   4 429.307 12.8435  -2
  -3  -4   1 429.307 12.8435   1
   2  -2   3 1518.43 25.8480  -2
  -2  -4   1 1518.43 25.8480   1
   1  -3   2 281.946 9.25077  -2
  -1  -4   1 281.946 9.25077   1
   0  -4   1 455.355 15.4893  -2
   0  -4   1 455.355 15.4893   1
   1   5   0 286.067 27.6966  -2
   1  -4   1 286.067 27.6966   1
   2   6   1 1373.52 103.231  -2
   2  -4   1 1373.52 103.231   1
   3   7   2 864.193 46.4793  -2
   3  -4   1 864.193 46.4793   1
   4   8   3 -33.675 77.8709  -2
   4  -4   1 -33.675 77.8709   1
   5   9   4 243.354 95.8394  -2
   5  -4   1 243.354 95.8394   1
   6  -4   1 9.62081 4.52844   1
   7  -4   1 33.9181 7.15237   1
   8  -4   1 558.543 29.1583   1
   8  12   7 353.379 32.2129  -2
   9  -4   1 353.379 32.2129   1
   9  13   8 -2.0924 27.0039  -2
  10  -4   1 -2.0924 27.0039   1
  12   9  13 221.256 47.7755  -2
 -13  -3   1 221.256 47.7755   1
 -12  -3   1 -17.098 14.2449   1
  10   7  11 277.529 43.6700  -2
 -11  -3   1 277.529 43.6700   1
 -10  -3   1 150.269 20.0886   1
  -9  -3   1 57.8302 14.6311   1
  -8  -3   1 85.6455 14.9421   1
  -7  -3   1 885.137 29.0761   1
   6   3   7 431.620 22.8259  -2
  -6  -3   1 431.620 22.8259   1
   5   2   6 420.894 20.2775  -2
  -5  -3   1 420.894 20.2775   1
   4   1   5 442.568 17.6322  -2
  -4  -3   1 442.568 17.6322   1
   3   0   4 465.637 15.3574  -2
  -3  -3   1 465.637 15.3574   1
   2  -1   3 1566.57 24.8001  -2
  -2  -3   1 1566.57 24.8001   1
   1  -2   2 2559.29 39.0585  -2
  -1  -3   1 2559.29 39.0585   1
   0  -3   1 6459.34 115.342  -2
   0  -3   1 6459.34 115.342   1
   1   4   0 1824.39 105.022  -2
   1  -3   1 1824.39 105.022   1
   2   5   1 787.289 32.3013  -2
   2  -3   1 787.289 32.3013   1
   3   6   2 937.725 36.6723  -2
   3  -3   1 937.725 36.6723   1
   4   7   3 209.558 28.4414  -2
   4  -3   1 209.558 28.4414   1
   5   8   4 -44.185 81.8487  -2
   5  -3   1 -44.185 81.8487   1
   6  -3   1 441.324 14.7121   1
   7  -3   1 290.419 13.4739   1
   8  -3   1 -5.3924 5.89144   1
   8  11   7 14.1057 39.5205  -2
   9  -3   1 14.1057 39.5205   1
   9  12   8 39.6163 26.8541  -2
  10  -3   1 39.6163 26.8541   1
  10  13   9 94.9290 28.7153  -2
  11  -3   1 94.9290 28.7153   1
  11  14  10 25.5956 41.9885  -2
  12  -3   1 25.5956 41.9885   1
  12  10  13 298.260 48.2031  -2
 -13  -2   1 298.260 48.2031   1
  11   9  12 508.277 51.8502  -2
 -12  -2   1 508.277 51.8502   1
  10   8  11 351.060 45.1480  -2
 -11  -2   1 351.060 45.1480   1
 -10  -2   1 12.9072 8.64967   1
  -9  -2   1 8.46432 7.53217   1
  -8  -2   1 10.9122 6.66269   1
  -7  -2   1 -3.8985 5.64433   1
  -6  -2   1 331.368 19.3938   1
   5   3   6 2339.58 54.5538  -2
  -5  -2   1 2339.58 54.5538   1
   4   2   5 2447.42 54.0476  -2
  -4  -2   1 2447.42 54.0476   1
   3   1   4 1343.15 31.9366  -2
  -3  -2   1 1343.15 31.9366   1
   2   0   3 2870.55 45.5673  -2
  -2  -2   1 2870.55 45.5673   1
   1  -1   2 2241.81 33.8175  -2
  -1  -2   1 2241.81 33.8175   1
   0  -2   1 161.314 6.60954  -2
   0  -2   1 161.314 6.60954   1
   1   3   0 2245.29 47.1932  -2
   1  -2   1 2245.29 47.1932   1
   2   4   1 7870.22 168.640  -2
   2  -2   1 7870.22 168.640   1
   3   5   2 73.2647 11.7145  -2
   3  -2   1 73.2647 11.7145   1
   4   6   3 2695.99 64.2685  -2
   4  -2   1 2695.99 64.2685   1
   5   7   4 887.590 103.190  -2
   5  -2   1 887.590 103.190   1
   6  -2   1 309.789 12.5218   1
   7  -2   1 -0.5576 6.78691   1
   8  -2   1 14.2693 5.98599   1
   9  -2   1 1.87644 5.59213   1
   9  11   8 62.1055 40.6505  -2
  10  -2   1 62.1055 40.6505   1
  10  12   9 166.141 29.8894  -2
  11  -2   1 166.141 29.8894   1
  11  13  10 270.277 47.6830  -2
  12  -2   1 270.277 47.6830   1
  12  11  13 271.475 42.3812  -2
 -13  -1   1 271.475 42.3812   1
  11  10  12 143.657 40.5105  -2
 -12  -1   1 143.657 40.5105   1
  10   9  11 64.8139 28.6766  -2
 -11  -1   1 64.8139 28.6766   1
   9   8  10 117.493 43.8860  -2
 -10  -1   1 117.493 43.8860   1
  -9  -1   1 106.535 15.3763   1
  -8  -1   1 17.8659 5.47936   1
  -7  -1   1 170.881 13.0390   1
  -6  -1   1 285.332 14.7436   1
   5   4   6 164.335 53.6802  -2
  -5  -1   1 164.335 53.6802   1
   4   3   5 638.840 19.4444  -2
  -4  -1   1 638.840 19.4444   1
   3   2   4 1390.44 29.9760  -2
  -3  -1   1 1390.44 29.9760   1
   2   1   3 411.324 10.9664  -2
  -2  -1   1 411.324 10.9664   1
   1   0   2 734.024 12.1281  -2
  -1  -1   1 734.024 12.1281   1
   0  -1   1 2501.78 55.0704  -2
   0  -1   1 2501.78 55.0704   1
   1   2   0 1604.19 37.6106  -2
   1  -1   1 1604.19 37.6106   1
   2   3   1 5048.57 90.3381  -2
   2  -1   1 5048.57 90.3381   1
   3   4   2 3763.98 57.8657  -2
   3  -1   1 3763.98 57.8657   1
   4   5   3 551.317 20.7637  -2
   4  -1   1 551.317 20.7637   1
   5   6   4 26.2897 17.5565  -2
   5  -1   1 26.2897 17.5565   1
   6  -1   1 540.905 18.1966   1
   7  -1   1 772.597 23.4720   1
   8  -1   1 331.138 17.4290   1
   9  -1   1 44.2682 8.84793   1
   9  10   8 263.482 42.2316  -2
  10  -1   1 263.482 42.2316   1
  10  11   9 52.2803 40.0291  -2
  11  -1   1 52.2803 40.0291   1
  11  12  10 184.898 45.4432  -2
  12  -1   1 184.898 45.4432   1
  12  12  13 294.147 46.9127  -2
 -13   0   1 294.147 46.9127   1
  11  11  12 537.364 56.7895  -2
 -12   0   1 537.364 56.7895   1
  10  10  11 60.5832 21.5526  -2
 -11   0   1 60.5832 21.5526   1
   9   9  10 -12.628 37.5261  -2
 -10   0   1 -12.628 37.5261   1
  -9   0   1 480.216 22.4253   1
  -8   0   1 745.074 25.4245   1
  -7   0   1 -3.7188 5.80337   1
  -6   0   1 91.6119 9.88189   1
  -5   0   1 -3.6956 3.12777   1
   4   4   5 447.451 68.4215  -2
  -4   0   1 447.451 68.4215   1
   3   3   4 1055.70 22.9643  -2
  -3   0   1 1055.70 22.9643   1
   2   2   3 608.505 15.2521  -2
  -2   0   1 608.505 15.2521   1
   1   1   2 74.9853 3.95952  -2
  -1   0   1 74.9853 3.95952   1
   0   0   1 2.51114 0.90403   1
   1   1   0 102.821 3.75027  -2
   1   0   1 102.821 3.75027   1
   2   2   1 250.065 6.90485  -2
   2   0   1 250.065 6.90485   1
   3   3   2 1587.94 32.7457  -2
   3   0   1 1587.94 32.7457   1
   4   4   3 2126.78 42.6123  -2
   4   0   1 2126.78 42.6123   1
   5   5   4 2081.42 42.4713  -2
   5   0   1 2081.42 42.4713   1
   6   0   1 550.693 18.1978   1
   7   0   1 17.9408 4.79692   1
   8   0   1 678.590 23.5396   1
   9   0   1 320.405 18.7257   1
  10   0   1 -1.6200 5.58123   1
  10  10   9 146.110 42.6022  -2
  11   0   1 146.110 42.6022   1
  11  11  10 160.768 107.776  -2
  12   0   1 160.768 107.776   1
  12  12  11 185.673 42.0747  -2
  13   0   1 185.673 42.0747   1
  11  12  12 126.048 31.5431  -2
 -12   1   1 126.048 31.5431   1
  10  11  11 84.6041 25.9285  -2
 -11   1   1 84.6041 25.9285   1
   9  10  10 96.2016 25.3875  -2
 -10   1   1 96.2016 25.3875   1
   8   9   9 26.2090 37.8861  -2
  -9   1   1 26.2090 37.8861   1
  -8   1   1 412.988 19.1380   1
  -7   1   1 280.854 14.7938   1
  -6   1   1 180.497 11.9042   1
  -5   1   1 420.904 14.9342   1
   4   5   5 505.301 84.3944  -2
  -4   1   1 505.301 84.3944   1
   3   4   4 257.391 22.0562  -2
  -3   1   1 257.391 22.0562   1
   2   3   3 2455.48 132.476  -2
  -2   1   1 2455.48 132.476   1
   1   2   2 1410.57 47.7348  -2
  -1   1   1 1410.57 47.7348   1
   0   1   1 3546.16 112.843  -2
   0   1   1 3546.16 112.843   1
   1   0   0 3522.82 78.2790  -2
   1   1   1 3522.82 78.2790   1
   2   1   1 2290.33 52.7383  -2
   2   1   1 2290.33 52.7383   1
   3   2   2 2758.14 64.8544  -2
   3   1   1 2758.14 64.8544   1
   4   3   3 796.205 21.4009  -2
   4   1   1 796.205 21.4009   1
   5   4   4 996.105 26.3200  -2
   5   1   1 996.105 26.3200   1
   6   5   5 33.8238 26.0079  -2
   6   1   1 33.8238 26.0079   1
   7   6   6 92.7339 77.4542  -2
   7   1   1 92.7339 77.4542   1
   8   1   1 -6.1647 4.52100   1
   9   1   1 27.6131 9.16131   1
  10   1   1 14.4971 8.45941   1
  11   1   1 46.0119 12.2660   1
  12   1   1 19.6277 15.3336   1
  12  11  11 221.390 45.8823  -2
  13   1   1 221.390 45.8823   1
  11  13  12 126.748 29.7514  -2
 -12   2   1 126.748 29.7514   1
  10  12  11 7.37652 36.7200  -2
 -11   2   1 7.37652 36.7200   1
   9  11  10 -7.4988 34.9619  -2
 -10   2   1 -7.4988 34.9619   1
   8  10   9 -23.923 107.136  -2
  -9   2   1 -23.923 107.136   1
  -8   2   1 -11.701 4.97145   1
  -7   2   1 0.48441 4.51119   1
  -6   2   1 143.856 11.3464   1
  -5   2   1 1146.18 27.7674   1
   4   6   5 1405.50 121.438  -2
  -4   2   1 1405.50 121.438   1
   3   5   4 175.173 17.3650  -2
  -3   2   1 175.173 17.3650   1
   2   4   3 960.518 39.8085  -2
  -2   2   1 960.518 39.8085   1
   1   3   2 8262.08 256.535  -2
  -1   2   1 8262.08 256.535   1
   0   2   1 3.56842 11.9723  -2
   0   2   1 3.56842 11.9723   1
  -1   1   0 304.580 8.60661  -2
   1   2   1 304.580 8.60661   1
   2   0   1 209.000 6.96734  -2
   2   2   1 209.000 6.96734   1
   3   1   2 64.4769 21.5632  -2
   3   2   1 64.4769 21.5632   1
   4   2   3 544.452 26.7276  -2
   4   2   1 544.452 26.7276   1
   5   3   4 365.339 19.1269  -2
   5   2   1 365.339 19.1269   1
   6   4   5 382.077 23.8247  -2
   6   2   1 382.077 23.8247   1
   7   5   6 30.0184 30.3187  -2
   7   2   1 30.0184 30.3187   1
   8   2   1 280.491 19.5947   1
   9   2   1 111.034 17.3932   1
  10   2   1 -1.3890 7.87127   1
  11   2   1 147.019 27.1587   1
  12   2   1 217.465 31.3270   1
  12  10  11 16.0123 47.5211  -2
  13   2   1 16.0123 47.5211   1
  10  13  11 104.141 43.4518  -2
 -11   3   1 104.141 43.4518   1
   9  12  10 59.9397 26.9914  -2
 -10   3   1 59.9397 26.9914   1
   8  11   9 45.4533 25.9642  -2
  -9   3   1 45.4533 25.9642   1
  -8   3   1 535.489 28.2991   1
  -7   3   1 632.519 21.9009   1
  -6   3   1 367.288 16.5142   1
  -5   3   1 11.0666 3.36626   1
  -4   3   1 460.699 19.5655   1
   3   6   4 4087.24 220.847  -2
  -3   3   1 4087.24 220.847   1
   2   5   3 3173.62 91.1547  -2
  -2   3   1 3173.62 91.1547   1
   1   4   2 19.5715 18.6834  -2
  -1   3   1 19.5715 18.6834   1
   0   3   1 31.8468 20.0567  -2
   0   3   1 31.8468 20.0567   1
  -1   2   0 575.034 19.4730  -2
   1   3   1 575.034 19.4730   1
   2  -1   1 5425.52 90.3995  -2
   2   3   1 5425.52 90.3995   1
   3   0   2 313.305 11.5068  -2
   3   3   1 313.305 11.5068   1
   4   1   3 457.115 16.7030  -2
   4   3   1 457.115 16.7030   1
   5   2   4 31.0076 12.5257  -2
   5   3   1 31.0076 12.5257   1
   6   3   5 1255.36 39.9525  -2
   6   3   1 1255.36 39.9525   1
   7   4   6 829.180 31.3234  -2
   7   3   1 829.180 31.3234   1
   8   5   7 104.625 32.6107  -2
   8   3   1 104.625 32.6107   1
   9   6   8 356.922 44.2421  -2
   9   3   1 356.922 44.2421   1
  10   3   1 655.111 32.5601   1
  11   3   1 129.130 25.8638   1
  11   8  10 344.593 45.5293  -2
  12   3   1 344.593 45.5293   1
  12   9  11 54.8251 50.3795  -2
  13   3   1 54.8251 50.3795   1
  13  10  12 -14.974 48.7067  -2
  14   3   1 -14.974 48.7067   1
  10  14  11 165.001 33.3955  -2
 -11   4   1 165.001 33.3955   1
   9  13  10 46.7642 28.6078  -2
 -10   4   1 46.7642 28.6078   1
   8  12   9 477.291 35.3460  -2
  -9   4   1 477.291 35.3460   1
  -8   4   1 353.564 36.4085   1
  -7   4   1 -9.5044 8.89007   1
  -6   4   1 -4.4290 4.33250   1
  -5   4   1 212.808 13.1586   1
  -4   4   1 395.829 19.0415   1
   3   7   4 1148.35 112.774  -2
  -3   4   1 1148.35 112.774   1
   2   6   3 545.802 80.6102  -2
  -2   4   1 545.802 80.6102   1
   1   5   2 490.952 33.7407  -2
  -1   4   1 490.952 33.7407   1
   0   4   1 -2.8597 3.77390   1
  -1   3   0 2037.50 51.3947  -2
   1   4   1 2037.50 51.3947   1
   2  -2   1 8467.28 131.153  -2
   2   4   1 8467.28 131.153   1
   3  -1   2 938.561 21.0193  -2
   3   4   1 938.561 21.0193   1
   4   0   3 4073.59 70.6191  -2
   4   4   1 4073.59 70.6191   1
   5   1   4 3348.98 71.9352  -2
   5   4   1 3348.98 71.9352   1
   6   2   5 1919.18 47.5027  -2
   6   4   1 1919.18 47.5027   1
   7   3   6 30.8401 15.7686  -2
   7   4   1 30.8401 15.7686   1
   8   4   7 110.364 20.5305  -2
   8   4   1 110.364 20.5305   1
   9   5   8 61.8440 36.3019  -2
   9   4   1 61.8440 36.3019   1
  10   4   1 13.6474 8.35437   1
  11   4   1 -8.1499 13.3254   1
  12   4   1 -1.0633 14.6606   1
  13   4   1 -3.0141 16.1997   1
  13   9  12 60.5618 55.2921  -2
  14   4   1 60.5618 55.2921   1
   9  14  10 267.728 35.6483  -2
 -10   5   1 267.728 35.6483   1
   8  13   9 54.3322 28.9849  -2
  -9   5   1 54.3322 28.9849   1
   7  12   8 32.7108 26.9891  -2
  -8   5   1 32.7108 26.9891   1
  -7   5   1 -0.8508 6.13024   1
  -6   5   1 23.5919 5.43879   1
   4   9   5 -75.649 88.3309  -2
  -5   5   1 -75.649 88.3309   1
  -4   5   1 22.2124 5.74948   1
  -3   5   1 977.284 31.1696   1
  -2   5   1 68.7424 12.2138   1
   1   6   2 1102.15 53.6007  -2
  -1   5   1 1102.15 53.6007   1
   0   5   1 1774.68 70.9481  -2
   0   5   1 1774.68 70.9481   1
  -1   4   0 1133.05 34.4182  -2
   1   5   1 1133.05 34.4182   1
   2  -3   1 777.387 20.4549  -2
   2   5   1 777.387 20.4549   1
   3  -2   2 3109.99 55.7921  -2
   3   5   1 3109.99 55.7921   1
   4  -1   3 579.077 17.4890  -2
   4   5   1 579.077 17.4890   1
   5   0   4 82.6323 11.6836  -2
   5   5   1 82.6323 11.6836   1
   6   1   5 -2.0676 14.4323  -2
   6   5   1 -2.0676 14.4323   1
   7   2   6 127.068 17.3222  -2
   7   5   1 127.068 17.3222   1
   8   3   7 -26.857 23.2010  -2
   8   5   1 -26.857 23.2010   1
   9   4   8 579.191 30.1623  -2
   9   5   1 579.191 30.1623   1
  10   5   9 125.553 39.3636  -2
  10   5   1 125.553 39.3636   1
  11   5   1 7.99647 9.40061   1
  12   5   1 -7.2471 15.1915   1
  13   7  11 251.273 35.1827  -2
  13   5   1 251.273 35.1827   1
  14   5   1 49.9965 20.4231   1
   8  14   9 19.0759 29.9301  -2
  -9   6   1 19.0759 29.9301   1
   7  13   8 89.9353 29.3516  -2
  -8   6   1 89.9353 29.3516   1
  -7   6   1 35.8357 8.41885   1
  -6   6   1 25.7975 5.96787   1
   4  10   5 -67.840 96.2334  -2
  -5   6   1 -67.840 96.2334   1
  -4   6   1 -5.9035 5.29826   1
  -3   6   1 650.469 26.4136   1
  -2   6   1 2574.54 67.1642   1
  -1   6   1 1528.44 40.4986   1
   0   6   1 125.556 30.4049  -2
   0   6   1 125.556 30.4049   1
  -1   5   0 1504.14 43.8797  -2
   1   6   1 1504.14 43.8797   1
   2  -4   1 521.661 25.1355  -2
   2   6   1 521.661 25.1355   1
   3  -3   2 435.656 15.6333  -2
   3   6   1 435.656 15.6333   1
   4  -2   3 1691.86 35.3116  -2
   4   6   1 1691.86 35.3116   1
   5  -1   4 1652.00 34.8732  -2
   5   6   1 1652.00 34.8732   1
   6   0   5 189.251 12.7984  -2
   6   6   1 189.251 12.7984   1
   7   1   6 -11.407 14.5069  -2
   7   6   1 -11.407 14.5069   1
   8   2   7 319.195 23.3477  -2
   8   6   1 319.195 23.3477   1
   9   3   8 173.918 24.4914  -2
   9   6   1 173.918 24.4914   1
  10   4   9 107.514 38.2308  -2
  10   6   1 107.514 38.2308   1
  12   6  10 15.8353 42.4574  -2
  12   6   1 15.8353 42.4574   1
  13   6   1 -10.471 15.6025   1
  14   6   1 59.9411 21.9305   1
   7  14   8 359.113 36.2067  -2
  -8   7   1 359.113 36.2067   1
   6  13   7 568.023 53.7663  -2
  -7   7   1 568.023 53.7663   1
  -6   7   1 253.094 22.9893   1
   4  11   5 4.36985 109.062  -2
  -5   7   1 4.36985 109.062   1
   3  10   4 360.446 108.158  -2
  -4   7   1 360.446 108.158   1
  -3   7   1 29.2101 7.14295   1
  -2   7   1 70.6531 8.38751   1
   1   8   2 57.3318 73.2026  -2
  -1   7   1 57.3318 73.2026   1
   0   7   1 165.972 15.4476   1
   1   7   1 868.366 42.2852   1
   2  -5   1 154.739 19.8895  -2
   2   7   1 154.739 19.8895   1
   3  -4   2 -14.217 13.4713  -2
   3   7   1 -14.217 13.4713   1
   4  -3   3 156.807 13.8747  -2
   4   7   1 156.807 13.8747   1
   5  -2   4 300.543 18.1045  -2
   5   7   1 300.543 18.1045   1
   6  -1   5 564.399 19.9203  -2
   6   7   1 564.399 19.9203   1
   7   0   6 370.430 17.4198  -2
   7   7   1 370.430 17.4198   1
   8   1   7 79.4863 19.1403  -2
   8   7   1 79.4863 19.1403   1
   9   2   8 468.249 31.0487  -2
   9   7   1 468.249 31.0487   1
  10   3   9 1001.65 67.0580  -2
  10   7   1 1001.65 67.0580   1
  11   4   9 371.850 52.8928  -2
  11   7   1 371.850 52.8928   1
  12   5  10 -39.934 42.1502  -2
  12   7   1 -39.934 42.1502   1
  13   6  11 -4.8336 47.9169  -2
  13   7   1 -4.8336 47.9169   1
  14   7   1 49.3862 16.9544   1
   6  14   7 5.32035 43.8175  -2
  -7   8   1 5.32035 43.8175   1
   5  13   6 245.308 42.0089  -2
  -6   8   1 245.308 42.0089   1
   4  12   5 103.053 40.0061  -2
  -5   8   1 103.053 40.0061   1
   3  11   4 -68.571 111.386  -2
  -4   8   1 -68.571 111.386   1
  -3   8   1 8.78060 6.89749   1
  -2   8   1 156.761 17.8555   1
  -1   8   1 -4.8716 5.68529   1
   0   8   1 82.5122 13.8616   1
  -1   7   0 577.990 84.7646  -2
   1   8   1 577.990 84.7646   1
   2  -6   1 1112.98 40.3435  -2
   2   8   1 1112.98 40.3435   1
   3  -5   2 550.960 21.5196  -2
   3   8   1 550.960 21.5196   1
   4  -4   3 107.098 15.6628  -2
   4   8   1 107.098 15.6628   1
   5  -3   4 963.865 27.3896  -2
   5   8   1 963.865 27.3896   1
   6  -2   5 405.969 19.9785  -2
   6   8   1 405.969 19.9785   1
   7  -1   6 109.674 15.2703  -2
   7   8   1 109.674 15.2703   1
   8   0   7 -12.051 21.5805  -2
   8   8   1 -12.051 21.5805   1
   9   1   8 43.7186 21.5948  -2
   9   8   1 43.7186 21.5948   1
  10   2   9 109.777 47.0267  -2
  10   8   1 109.777 47.0267   1
  12   4  10 0.90443 47.8384  -2
  12   8   1 0.90443 47.8384   1
  13   5  11 58.0994 51.3134  -2
  13   8   1 58.0994 51.3134   1
  14   8   1 10.0656 19.2111   1
   5  14   6 214.774 43.3192  -2
  -6   9   1 214.774 43.3192   1
  -5   9   1 -4.6622 10.0733   1
  -4   9   1 88.5430 26.8197   1
   2  11   3 216.798 116.351  -2
  -3   9   1 216.798 116.351   1
   1  10   2 51.3853 99.3393  -2
  -2   9   1 51.3853 99.3393   1
  -1   9   1 7.64176 7.06089   1
   0   9   1 118.516 16.6624   1
   1   9   1 37.3145 7.50111   1
   2  -7   1 88.9918 78.9354  -2
   2   9   1 88.9918 78.9354   1
   3   9   1 1123.98 35.9688   1
   4  -5   3 239.324 21.6683  -2
   4   9   1 239.324 21.6683   1
   5  -4   4 139.205 25.0744  -2
   5   9   1 139.205 25.0744   1
   6  -3   5 118.110 18.1443  -2
   6   9   1 118.110 18.1443   1
   7  -2   6 314.670 21.1614  -2
   7   9   1 314.670 21.1614   1
   8  -1   7 406.827 49.6162  -2
   8   9   1 406.827 49.6162   1
   9   0   8 576.823 35.0058  -2
   9   9   1 576.823 35.0058   1
  10   1   9 484.353 70.4413  -2
  10   9   1 484.353 70.4413   1
  13   4  11 2.07215 57.4034  -2
  13   9   1 2.07215 57.4034   1
  -5  10   1 34.8794 21.7596   1
  -4  10   1 4.51109 9.90550   1
   2  12   3 142.764 45.7718  -2
  -3  10   1 142.764 45.7718   1
   1  11   2 182.059 112.882  -2
  -2  10   1 182.059 112.882   1
   0  10   1 47.3023 97.5687  -2
  -1  10   1 47.3023 97.5687   1
   0  10   1 -17.832 6.24544   1
   1  10   1 36.2323 7.83684   1
   2  -8   1 107.622 32.0017  -2
   2  10   1 107.622 32.0017   1
   3  -7   2 141.888 36.1182  -2
   3  10   1 141.888 36.1182   1
   4  -6   3 121.688 21.9744  -2
   4  10   1 121.688 21.9744   1
   5  -5   4 453.966 28.9995  -2
   5  10   1 453.966 28.9995   1
   6  -4   5 810.782 32.2701  -2
   6  10   1 810.782 32.2701   1
   7  -3   6 108.595 21.7838  -2
   7  10   1 108.595 21.7838   1
   8  -2   7 354.851 32.5491  -2
   8  10   1 354.851 32.5491   1
   9  -1   8 82.7369 28.6271  -2
   9  10   1 82.7369 28.6271   1
  10   0   9 62.8660 33.9837  -2
  10  10   1 62.8660 33.9837   1
  -3  11   1 7.32576 11.8503   1
  -2  11   1 25.1448 11.5278   1
  -1  11   1 17.0602 8.84764   1
   0  11   1 12.0337 8.26577   1
   1  11   1 26.9228 8.61906   1
   2  11   1 88.8524 20.2477   1
   3  11   1 305.675 25.6444   1
   4  -7   3 177.947 30.7295  -2
   4  11   1 177.947 30.7295   1
   5  -6   4 191.071 25.9601  -2
   5  11   1 191.071 25.9601   1
   6  -5   5 1295.13 46.9494  -2
   6  11   1 1295.13 46.9494   1
   7  -4   6 386.453 24.9151  -2
   7  11   1 386.453 24.9151   1
   8  -3   7 -28.836 29.2198  -2
   8  11   1 -28.836 29.2198   1
   9  -2   8 78.7289 33.8602  -2
   9  11   1 78.7289 33.8602   1
  10  -1   9 117.951 36.1037  -2
  10  11   1 117.951 36.1037   1
  11   0  10 2.36005 38.4802  -2
  11  11   1 2.36005 38.4802   1
  12   1  11 -35.820 37.5776  -2
  12  11   1 -35.820 37.5776   1
  -1  12   1 113.132 31.3275   1
   0  12   1 9.76890 9.06958   1
   1  12   1 179.823 24.4199   1
   2  12   1 200.086 24.6444   1
   3  12   1 -3.1632 9.08079   1
   4  12   1 -0.8706 8.88443   1
   5  -7   4 8.16093 31.5392  -2
   5  12   1 8.16093 31.5392   1
   6  -6   5 212.988 28.1807  -2
   6  12   1 212.988 28.1807   1
   7  -5   6 321.914 26.9153  -2
   7  12   1 321.914 26.9153   1
   8  -4   7 145.407 32.8542  -2
   8  12   1 145.407 32.8542   1
   9  -3   8 37.6231 33.9965  -2
   9  12   1 37.6231 33.9965   1
  10  -2   9 55.0918 47.0916  -2
  10  12   1 55.0918 47.0916   1
  11  -1  10 -9.5835 52.3961  -2
  11  12   1 -9.5835 52.3961   1
   1  13   1 11.9962 11.3133   1
   2  13   1 43.7566 14.1519   1
   4 -10   2 248.035 50.6886  -2
   3  13   1 248.035 50.6886   1
   5  -9   3 110.395 46.7496  -2
   4  13   1 110.395 46.7496   1
   6  13   1 -15.294 12.4349   1
   7  -6   6 108.262 40.1794  -2
   7  13   1 108.262 40.1794   1
   8  -5   7 -12.289 42.5576  -2
   8  13   1 -12.289 42.5576   1
   9  -4   8 151.916 51.8615  -2
   9  13   1 151.916 51.8615   1
  10  -3   9 43.8664 54.9108  -2
  10  13   1 43.8664 54.9108   1
  11  -2  10 -8.8955 55.6383  -2
  11  13   1 -8.8955 55.6383   1
   3 -12   1 186.232 55.5378  -2
   2  14   1 186.232 55.5378   1
   4 -11   2 142.492 52.5047  -2
   3  14   1 142.492 52.5047   1
   5 -10   3 154.440 50.0488  -2
   4  14   1 154.440 50.0488   1
   6  -9   4 149.014 49.3873  -2
   5  14   1 149.014 49.3873   1
   6  14   1 0.40483 14.0062   1
   7  14   1 22.5236 17.0598   1
   8  14   1 31.6641 20.8727   1
   9  -5   8 26.5339 51.2870  -2
   9  14   1 26.5339 51.2870   1
   3  15   1 172.873 41.0117   1
   4  15   1 61.2205 21.9000   1
   5  15   1 7.72563 11.1253   1
   6  15   1 13.4496 16.1669   1
   7  15   1 6.23940 16.7637   1
   4 -10   6 351.115 55.9839  -2
  -4 -14   2 351.115 55.9839   1
  -3 -14   2 179.419 38.2665   1
  -2 -14   2 126.526 39.2261   1
   9  -4  11 37.9258 30.7241  -2
  -9 -13   2 37.9258 30.7241   1
   8  -5  10 217.193 42.9457  -2
  -8 -13   2 217.193 42.9457   1
   7  -6   9 101.777 38.7920  -2
  -7 -13   2 101.777 38.7920   1
   6  -7   8 56.4286 33.5009  -2
  -6 -13   2 56.4286 33.5009   1
   5  -8   7 84.5801 123.536  -2
  -5 -13   2 84.5801 123.536   1
   4  -9   6 170.295 131.836  -2
  -4 -13   2 170.295 131.836   1
  -3 -13   2 52.1946 70.1460   1
   3 -11   4 217.521 52.2545  -2
  -2 -13   2 217.521 52.2545   1
   2 -12   3 106.641 49.6343  -2
  -1 -13   2 106.641 49.6343   1
   1 -13   2 130.086 50.9511  -2
   0 -13   2 130.086 50.9511   1
  10  -2  12 77.2196 37.8026  -2
 -10 -12   2 77.2196 37.8026   1
   9  -3  11 206.039 39.1966  -2
  -9 -12   2 206.039 39.1966   1
   8  -4  10 41.5842 27.1111  -2
  -8 -12   2 41.5842 27.1111   1
   7  -5   9 32.8797 34.0796  -2
  -7 -12   2 32.8797 34.0796   1
   6  -6   8 22.0611 24.3568  -2
  -6 -12   2 22.0611 24.3568   1
   5  -7   7 37.1786 22.7952  -2
  -5 -12   2 37.1786 22.7952   1
   4  -8   6 227.753 27.1559  -2
  -4 -12   2 227.753 27.1559   1
   3  -9   5 202.984 130.900  -2
  -3 -12   2 202.984 130.900   1
   2 -10   4 81.5510 125.929  -2
  -2 -12   2 81.5510 125.929   1
  -1 -12   2 3.57163 15.6043   1
   0 -12   2 2.94073 18.4531   1
   0 -12   2 -23.138 123.170  -2
   1 -12   2 -23.138 123.170   1
  11   0  13 -19.418 55.1641  -2
 -11 -11   2 -19.418 55.1641   1
  10  -1  12 46.0750 38.5403  -2
 -10 -11   2 46.0750 38.5403   1
   9  -2  11 21.3909 25.7199  -2
  -9 -11   2 21.3909 25.7199   1
   8  -3  10 97.3869 29.6162  -2
  -8 -11   2 97.3869 29.6162   1
   7  -4   9 61.0196 24.9580  -2
  -7 -11   2 61.0196 24.9580   1
   6  -5   8 91.1666 22.3819  -2
  -6 -11   2 91.1666 22.3819   1
   5  -6   7 -19.469 21.0912  -2
  -5 -11   2 -19.469 21.0912   1
   4  -7   6 -6.6292 21.3307  -2
  -4 -11   2 -6.6292 21.3307   1
   3  -8   5 110.481 19.9366  -2
  -3 -11   2 110.481 19.9366   1
   2  -9   4 785.941 62.5545  -2
  -2 -11   2 785.941 62.5545   1
  -1 -11   2 226.745 37.2409   1
   0 -11   2 24.1687 16.9920   1
   1 -11   2 15.4198 66.4438   1
   2  13   0 5.22665 130.727  -2
   3 -11   2 5.22665 130.727   1
   4  15   2 -129.29 154.541  -2
   5 -11   2 -129.29 154.541   1
  11   1  13 96.5172 59.2249  -2
 -11 -10   2 96.5172 59.2249   1
  10   0  12 118.594 39.1209  -2
 -10 -10   2 118.594 39.1209   1
   9  -1  11 -0.4213 30.5487  -2
  -9 -10   2 -0.4213 30.5487   1
   8  -2  10 41.9602 23.2801  -2
  -8 -10   2 41.9602 23.2801   1
   7  -3   9 201.485 25.2343  -2
  -7 -10   2 201.485 25.2343   1
   6  -4   8 302.593 21.1920  -2
  -6 -10   2 302.593 21.1920   1
   5  -5   7 189.699 21.6116  -2
  -5 -10   2 189.699 21.6116   1
   4  -6   6 120.185 15.5123  -2
  -4 -10   2 120.185 15.5123   1
   3  -7   5 502.476 19.4127  -2
  -3 -10   2 502.476 19.4127   1
   2  -8   4 22.8400 12.9647  -2
  -2 -10   2 22.8400 12.9647   1
   1  -9   3 57.8197 21.7448  -2
  -1 -10   2 57.8197 21.7448   1
   0 -10   2 29.1387 9.21551   1
   1 -10   2 5.07973 14.4645   1
   2 -10   2 7.54668 15.2247   1
   2  12   0 -45.142 119.144  -2
   3 -10   2 -45.142 119.144   1
   3  13   1 88.0265 47.8537  -2
   4 -10   2 88.0265 47.8537   1
   4  14   2 -81.579 139.818  -2
   5 -10   2 -81.579 139.818   1
   5  15   3 144.533 47.3206  -2
   6 -10   2 144.533 47.3206   1
  12   3  13 36.2200 57.6366  -2
 -12  -9   2 36.2200 57.6366   1
  11   2  12 26.2818 53.0059  -2
 -11  -9   2 26.2818 53.0059   1
   9   0  11 173.702 34.3755  -2
  -9  -9   2 173.702 34.3755   1
   8  -1  10 265.915 27.5043  -2
  -8  -9   2 265.915 27.5043   1
   7  -2   9 43.4635 19.4976  -2
  -7  -9   2 43.4635 19.4976   1
   6  -3   8 691.285 26.1126  -2
  -6  -9   2 691.285 26.1126   1
   5  -4   7 1014.99 30.2942  -2
  -5  -9   2 1014.99 30.2942   1
   4  -5   6 761.966 23.1699  -2
  -4  -9   2 761.966 23.1699   1
   3  -6   5 79.9313 12.5962  -2
  -3  -9   2 79.9313 12.5962   1
   2  -7   4 204.950 13.5065  -2
  -2  -9   2 204.950 13.5065   1
   1  -8   3 209.552 13.2622  -2
  -1  -9   2 209.552 13.2622   1
   0  -9   2 104.677 17.4863  -2
   0  -9   2 104.677 17.4863   1
   1  -9   2 527.855 28.9345   1
   2  -9   2 956.977 59.8403   1
   3  -9   2 177.418 34.9121   1
   4  -9   2 6.11128 15.1469   1
   5  -9   2 215.580 38.9681   1
 -13  -8   2 197.880 40.8291   1
  11   3  12 63.1699 46.3873  -2
 -11  -8   2 63.1699 46.3873   1
   9   1  11 639.070 36.6795  -2
  -9  -8   2 639.070 36.6795   1
   8   0  10 201.920 26.5699  -2
  -8  -8   2 201.920 26.5699   1
   7  -1   9 -21.551 23.3627  -2
  -7  -8   2 -21.551 23.3627   1
   6  -2   8 20.5513 15.5587  -2
  -6  -8   2 20.5513 15.5587   1
   5  -3   7 29.6175 14.6304  -2
  -5  -8   2 29.6175 14.6304   1
   4  -4   6 331.488 15.1338  -2
  -4  -8   2 331.488 15.1338   1
   3  -5   5 862.840 22.3335  -2
  -3  -8   2 862.840 22.3335   1
   2  -6   4 357.331 14.2265  -2
  -2  -8   2 357.331 14.2265   1
   1  -7   3 4.02397 9.17675  -2
  -1  -8   2 4.02397 9.17675   1
   0  -8   2 417.327 16.1970  -2
   0  -8   2 417.327 16.1970   1
  -1  -9   1 -23.381 36.7367  -2
   1  -8   2 -23.381 36.7367   1
   2  -8   2 103.647 17.5987   1
   3  -8   2 377.786 24.7127   1
   4  -8   2 44.5999 17.1122   1
   5  -8   2 8.35424 15.2538   1
   5  13   3 234.790 48.9720  -2
   6  -8   2 234.790 48.9720   1
  13   5  14 300.445 47.3057  -2
 -13  -7   2 300.445 47.3057   1
 -12  -7   2 71.3525 25.6180   1
  11   4  12 36.1467 38.1052  -2
 -11  -7   2 36.1467 38.1052   1
  10   3  12 215.840 46.3084  -2
 -10  -7   2 215.840 46.3084   1
   9   2  11 47.3648 26.6101  -2
  -9  -7   2 47.3648 26.6101   1
   8   1  10 71.4525 24.1380  -2
  -8  -7   2 71.4525 24.1380   1
   7   0   9 30.7754 20.8131  -2
  -7  -7   2 30.7754 20.8131   1
   6  -1   8 314.752 18.2203  -2
  -6  -7   2 314.752 18.2203   1
   5  -2   7 1000.08 26.8298  -2
  -5  -7   2 1000.08 26.8298   1
   4  -3   6 1777.53 33.2761  -2
  -4  -7   2 1777.53 33.2761   1
   3  -4   5 633.886 17.0553  -2
  -3  -7   2 633.886 17.0553   1
   2  -5   4 1123.26 24.3167  -2
  -2  -7   2 1123.26 24.3167   1
   1  -6   3 943.836 21.3199  -2
  -1  -7   2 943.836 21.3199   1
   0  -7   2 2.12144 12.6164  -2
   0  -7   2 2.12144 12.6164   1
  -1  -8   1 189.431 37.8937  -2
   1  -7   2 189.431 37.8937   1
   2  -7   2 -2.0607 4.89091   1
   3  -7   2 -6.4842 5.73417   1
   4  -7   2 1.69070 6.14643   1
   5  -7   2 -5.3589 6.24647   1
   5  12   3 -72.866 124.932  -2
   6  -7   2 -72.866 124.932   1
 -13  -6   2 -0.3843 38.3297   1
 -12  -6   2 47.8644 19.2612   1
  11   5  12 507.184 90.3814  -2
 -11  -6   2 507.184 90.3814   1
  10   4  11 589.665 84.8191  -2
 -10  -6   2 589.665 84.8191   1
   9   3  11 576.958 45.0814  -2
  -9  -6   2 576.958 45.0814   1
   8   2  10 71.7621 23.8528  -2
  -8  -6   2 71.7621 23.8528   1
   7   1   9 542.302 27.4857  -2
  -7  -6   2 542.302 27.4857   1
   6   0   8 290.832 20.9331  -2
  -6  -6   2 290.832 20.9331   1
   5  -1   7 358.232 19.9503  -2
  -5  -6   2 358.232 19.9503   1
   4  -2   6 229.644 11.0090  -2
  -4  -6   2 229.644 11.0090   1
   3  -3   5 265.375 11.3361  -2
  -3  -6   2 265.375 11.3361   1
   2  -4   4 726.392 17.9648  -2
  -2  -6   2 726.392 17.9648   1
   1  -5   3 436.886 12.9880  -2
  -1  -6   2 436.886 12.9880   1
   0  -6   2 1060.17 30.5947  -2
   0  -6   2 1060.17 30.5947   1
  -1  -7   1 84.3948 14.4396  -2
   1  -6   2 84.3948 14.4396   1
   2   8   0 691.430 43.0821  -2
   2  -6   2 691.430 43.0821   1
   3   9   1 1265.91 126.438  -2
   3  -6   2 1265.91 126.438   1
   4  -6   2 73.6819 12.3650   1
   5  -6   2 13.1689 6.19051   1
   6  -6   2 442.807 20.9518   1
   7  -6   2 565.455 33.0881   1
 -13  -5   2 31.6587 45.3634   1
 -12  -5   2 140.269 31.8023   1
 -11  -5   2 87.0532 19.5064   1
 -10  -5   2 56.5579 13.9941   1
  -9  -5   2 195.903 20.7048   1
   8   3  10 89.9775 55.8041  -2
  -8  -5   2 89.9775 55.8041   1
   7   2   9 140.671 21.1904  -2
  -7  -5   2 140.671 21.1904   1
   6   1   8 -27.157 15.1614  -2
  -6  -5   2 -27.157 15.1614   1
   5   0   7 391.487 15.7143  -2
  -5  -5   2 391.487 15.7143   1
   4  -1   6 328.866 12.3992  -2
  -4  -5   2 328.866 12.3992   1
   3  -2   5 39.0294 7.32221  -2
  -3  -5   2 39.0294 7.32221   1
   2  -3   4 354.621 11.3439  -2
  -2  -5   2 354.621 11.3439   1
   1  -4   3 390.159 12.1542  -2
  -1  -5   2 390.159 12.1542   1
   0  -5   2 400.432 14.5078  -2
   0  -5   2 400.432 14.5078   1
  -1  -6   1 1733.61 60.2590  -2
   1  -5   2 1733.61 60.2590   1
   2   7   0 2654.82 65.5379  -2
   2  -5   2 2654.82 65.5379   1
   3   8   1 674.944 40.6494  -2
   3  -5   2 674.944 40.6494   1
   4   9   2 63.0458 89.2128  -2
   4  -5   2 63.0458 89.2128   1
   5  -5   2 187.772 17.3910   1
   6  -5   2 -3.1781 4.74281   1
   6  11   4 -89.998 123.051  -2
   7  -5   2 -89.998 123.051   1
   8  -5   2 23.6522 7.45557   1
  12   8  14 116.153 90.7526  -2
 -13  -4   2 116.153 90.7526   1
 -12  -4   2 33.3386 42.3928   1
  10   6  12 179.583 42.5335  -2
 -11  -4   2 179.583 42.5335   1
 -10  -4   2 27.8668 9.62798   1
  -9  -4   2 11.2370 8.24228   1
  -8  -4   2 71.9176 17.6521   1
   7   3   9 52.1908 44.4412  -2
  -7  -4   2 52.1908 44.4412   1
   6   2   8 -0.1474 16.0017  -2
  -6  -4   2 -0.1474 16.0017   1
   5   1   7 84.6682 15.1264  -2
  -5  -4   2 84.6682 15.1264   1
   4   0   6 966.657 24.1151  -2
  -4  -4   2 966.657 24.1151   1
   3  -1   5 2001.75 33.1147  -2
  -3  -4   2 2001.75 33.1147   1
   2  -2   4 330.932 9.96091  -2
  -2  -4   2 330.932 9.96091   1
   1  -3   3 1827.31 34.5493  -2
  -1  -4   2 1827.31 34.5493   1
   0  -4   2 7280.13 130.734  -2
   0  -4   2 7280.13 130.734   1
  -1  -5   1 1361.95 36.9011  -2
   1  -4   2 1361.95 36.9011   1
   2   6   0 74.0332 11.8095  -2
   2  -4   2 74.0332 11.8095   1
   3   7   1 7.33439 12.8551  -2
   3  -4   2 7.33439 12.8551   1
   4   8   2 123.506 81.0377  -2
   4  -4   2 123.506 81.0377   1
   5   9   3 -85.521 90.3415  -2
   5  -4   2 -85.521 90.3415   1
   6  -4   2 73.9347 9.45512   1
   7  -4   2 -0.6328 4.53973   1
   8  -4   2 16.0500 6.65081   1
   9  -4   2 1.41993 6.63152   1
  12   9  14 2.82187 86.3715  -2
 -13  -3   2 2.82187 86.3715   1
 -12  -3   2 -10.499 38.6829   1
  10   7  12 247.508 43.7078  -2
 -11  -3   2 247.508 43.7078   1
 -10  -3   2 0.87949 8.67620   1
  -9  -3   2 200.200 19.9587   1
  -8  -3   2 -3.3519 6.30505   1
  -7  -3   2 184.037 15.3085   1
   6   3   8 602.490 58.8346  -2
  -6  -3   2 602.490 58.8346   1
   5   2   7 1363.10 37.3472  -2
  -5  -3   2 1363.10 37.3472   1
   4   1   6 3389.30 72.2132  -2
  -4  -3   2 3389.30 72.2132   1
   3   0   5 985.684 18.7269  -2
  -3  -3   2 985.684 18.7269   1
   2  -1   4 276.683 9.93989  -2
  -2  -3   2 276.683 9.93989   1
   1  -2   3 2146.36 33.7082  -2
  -1  -3   2 2146.36 33.7082   1
   0  -3   2 341.693 14.1294  -2
   0  -3   2 341.693 14.1294   1
  -1  -4   1 251.288 12.9234  -2
   1  -3   2 251.288 12.9234   1
   2   5   0 877.887 26.0208  -2
   2  -3   2 877.887 26.0208   1
   3   6   1 437.030 19.4182  -2
   3  -3   2 437.030 19.4182   1
   4   7   2 79.2985 15.5315  -2
   4  -3   2 79.2985 15.5315   1
   5   8   3 38.3894 28.1060  -2
   5  -3   2 38.3894 28.1060   1
   6  -3   2 3.34210 3.60241   1
   7  -3   2 146.666 11.3053   1
   8  -3   2 715.698 25.2805   1
   9  -3   2 293.077 18.5566   1
   9  12   7 123.067 41.8280  -2
  10  -3   2 123.067 41.8280   1
  10  13   8 272.284 46.6799  -2
  11  -3   2 272.284 46.6799   1
  12  10  14 274.164 46.2984  -2
 -13  -2   2 274.164 46.2984   1
  11   9  13 -57.732 79.0483  -2
 -12  -2   2 -57.732 79.0483   1
  10   8  12 138.384 30.7023  -2
 -11  -2   2 138.384 30.7023   1
   9   7  11 255.108 44.5945  -2
 -10  -2   2 255.108 44.5945   1
  -9  -2   2 17.1699 8.44079   1
  -8  -2   2 373.877 21.1990   1
  -7  -2   2 377.269 16.2788   1
  -6  -2   2 651.766 19.6771   1
   5   3   7 359.947 47.4067  -2
  -5  -2   2 359.947 47.4067   1
   4   2   6 1355.99 34.5158  -2
  -4  -2   2 1355.99 34.5158   1
   3   1   5 811.242 22.7336  -2
  -3  -2   2 811.242 22.7336   1
   2   0   4 1377.42 22.9536  -2
  -2  -2   2 1377.42 22.9536   1
   1  -1   3 105.211 6.41063  -2
  -1  -2   2 105.211 6.41063   1
   0  -2   2 3438.67 76.1145  -2
   0  -2   2 3438.67 76.1145   1
  -1  -3   1 2309.25 53.2582  -2
   1  -2   2 2309.25 53.2582   1
   2   4   0 2644.28 49.7792  -2
   2  -2   2 2644.28 49.7792   1
   3   5   1 3039.81 57.7067  -2
   3  -2   2 3039.81 57.7067   1
   4   6   2 349.478 14.9896  -2
   4  -2   2 349.478 14.9896   1
   5   7   3 410.808 31.7176  -2
   5  -2   2 410.808 31.7176   1
   6   8   4 424.901 97.3845  -2
   6  -2   2 424.901 97.3845   1
   7  -2   2 514.350 18.8693   1
   8  -2   2 52.2813 7.87216   1
   9  -2   2 9.17458 5.81615   1
   9  11   7 168.881 42.7478  -2
  10  -2   2 168.881 42.7478   1
  10  12   8 71.6715 39.7715  -2
  11  -2   2 71.6715 39.7715   1
  11  13   9 5.01602 42.0050  -2
  12  -2   2 5.01602 42.0050   1
  12  11  14 424.911 52.9912  -2
 -13  -1   2 424.911 52.9912   1
  11  10  13 646.327 57.1503  -2
 -12  -1   2 646.327 57.1503   1
  10   9  12 336.190 40.8108  -2
 -11  -1   2 336.190 40.8108   1
   9   8  11 -17.441 27.4451  -2
 -10  -1   2 -17.441 27.4451   1
  -9  -1   2 172.029 16.4429   1
  -8  -1   2 742.534 25.6664   1
  -7  -1   2 79.2330 11.2002   1
  -6  -1   2 343.895 15.9320   1
  -5  -1   2 135.214 10.3379   1
  -4  -1   2 393.637 13.8575   1
   3   2   5 156.857 10.1149  -2
  -3  -1   2 156.857 10.1149   1
   2   1   4 231.062 7.87705  -2
  -2  -1   2 231.062 7.87705   1
   1   0   3 357.908 7.63168  -2
  -1  -1   2 357.908 7.63168   1
   0  -1   2 375.666 11.7443  -2
   0  -1   2 375.666 11.7443   1
  -1  -2   1 2068.53 47.1118  -2
   1  -1   2 2068.53 47.1118   1
   2   3   0 615.621 18.5104  -2
   2  -1   2 615.621 18.5104   1
   3   4   1 835.750 16.7015  -2
   3  -1   2 835.750 16.7015   1
   4   5   2 2455.80 42.1202  -2
   4  -1   2 2455.80 42.1202   1
   5   6   3 2875.52 47.8842  -2
   5  -1   2 2875.52 47.8842   1
   6   7   4 720.517 37.0639  -2
   6  -1   2 720.517 37.0639   1
   7  -1   2 5.99516 4.73389   1
   8  -1   2 11.7251 5.88914   1
   9  -1   2 13.8368 6.01808   1
  10  -1   2 2.47233 6.15011   1
  10  11   8 153.072 43.5014  -2
  11  -1   2 153.072 43.5014   1
  11  12   9 211.637 44.8890  -2
  12  -1   2 211.637 44.8890   1
  11  11  13 186.940 46.8758  -2
 -12   0   2 186.940 46.8758   1
  10  10  12 44.0171 26.7825  -2
 -11   0   2 44.0171 26.7825   1
   9   9  11 40.9146 20.3449  -2
 -10   0   2 40.9146 20.3449   1
  -9   0   2 55.6342 9.72495   1
  -8   0   2 8.83516 5.94178   1
  -7   0   2 -6.3677 3.92536   1
  -6   0   2 189.805 12.1949   1
  -5   0   2 40.5614 6.06720   1
  -4   0   2 476.771 14.8648   1
   3   3   5 2706.82 139.731  -2
  -3   0   2 2706.82 139.731   1
   2   2   4 1005.31 25.6282  -2
  -2   0   2 1005.31 25.6282   1
   1   1   3 3045.52 52.4301  -2
  -1   0   2 3045.52 52.4301   1
   0   0   2 9999.99 218.522  -2
   0   0   2 9999.99 218.522   1
  -1  -1   1 641.756 17.2515  -2
   1   0   2 641.756 17.2515   1
   2   2   0 131.280 5.23423  -2
   2   0   2 131.280 5.23423   1
   3   3   1 400.739 10.2106  -2
   3   0   2 400.739 10.2106   1
   4   4   2 111.543 8.07928  -2
   4   0   2 111.543 8.07928   1
   5   5   3 283.546 11.6927  -2
   5   0   2 283.546 11.6927   1
   6   6   4 1051.24 51.0700  -2
   6   0   2 1051.24 51.0700   1
   7   0   2 137.902 11.7977   1
   8   0   2 210.337 15.3020   1
   9   0   2 -5.9674 7.16144   1
  10   0   2 12.7247 8.63499   1
  11   0   2 7.06567 11.7653   1
  12   0   2 71.4519 25.7981   1
  12  12  10 532.637 54.5917  -2
  13   0   2 532.637 54.5917   1
  11  12  13 195.311 31.9881  -2
 -12   1   2 195.311 31.9881   1
  10  11  12 95.1615 28.6867  -2
 -11   1   2 95.1615 28.6867   1
   9  10  11 49.9346 26.6170  -2
 -10   1   2 49.9346 26.6170   1
   8   9  10 118.592 39.5177  -2
  -9   1   2 118.592 39.5177   1
  -8   1   2 197.176 15.7213   1
  -7   1   2 29.8511 5.97734   1
  -6   1   2 519.678 18.0290   1
  -5   1   2 1776.02 37.3229   1
  -4   1   2 200.159 10.2521   1
  -3   1   2 263.245 10.0997   1
   2   3   4 1749.58 100.315  -2
  -2   1   2 1749.58 100.315   1
   1   2   3 528.767 23.1143  -2
  -1   1   2 528.767 23.1143   1
   0   1   2 66.6308 8.81599  -2
   0   1   2 66.6308 8.81599   1
  -1   0   1 65.8130 4.04931  -2
   1   1   2 65.8130 4.04931   1
   3   2   1 77.1661 5.94016  -2
   3   1   2 77.1661 5.94016   1
   4   3   2 1516.07 40.7247  -2
   4   1   2 1516.07 40.7247   1
   5   4   3 1096.85 34.4271  -2
   5   1   2 1096.85 34.4271   1
   6   5   4 837.255 31.7122  -2
   6   1   2 837.255 31.7122   1
   7   6   5 -27.987 72.4936  -2
   7   1   2 -27.987 72.4936   1
   8   7   6 573.625 45.6188  -2
   8   1   2 573.625 45.6188   1
   9   1   2 300.367 22.2124   1
  10   1   2 0.71149 7.82516   1
  11   1   2 68.0375 14.0363   1
  12   1   2 59.2066 26.0410   1
  13   1   2 53.6706 56.7110   1
  11  13  13 141.210 30.4546  -2
 -12   2   2 141.210 30.4546   1
  10  12  12 30.8912 28.9163  -2
 -11   2   2 30.8912 28.9163   1
   9  11  11 46.3331 26.3921  -2
 -10   2   2 46.3331 26.3921   1
   8  10  10 23.1486 24.6643  -2
  -9   2   2 23.1486 24.6643   1
  -8   2   2 754.632 25.7728   1
  -7   2   2 380.442 17.1383   1
  -6   2   2 157.054 11.8053   1
  -5   2   2 90.7291 11.6852   1
  -4   2   2 356.286 16.4463   1
   2   4   4 207.971 20.1644  -2
  -2   2   2 207.971 20.1644   1
   1   3   3 435.687 25.0875  -2
  -1   2   2 435.687 25.0875   1
   0   2   2 7834.62 243.204  -2
   0   2   2 7834.62 243.204   1
  -1   1   1 1525.80 35.7183  -2
   1   2   2 1525.80 35.7183   1
   2   0   0 1294.72 26.4776  -2
   2   2   2 1294.72 26.4776   1
   4   2   2 577.285 21.3963  -2
   4   2   2 577.285 21.3963   1
   5   3   3 182.611 22.2222  -2
   5   2   2 182.611 22.2222   1
   6   4   4 393.644 22.7770  -2
   6   2   2 393.644 22.7770   1
   7   5   5 434.350 26.4070  -2
   7   2   2 434.350 26.4070   1
   8   6   6 331.905 26.9164  -2
   8   2   2 331.905 26.9164   1
   9   7   7 242.261 95.2026  -2
   9   2   2 242.261 95.2026   1
  10   2   2 264.254 23.7875   1
  11   2   2 79.9615 24.5673   1
  11   9   9 380.575 48.3386  -2
  12   2   2 380.575 48.3386   1
  13   2   2 80.1859 55.4048   1
  10  13  12 64.2275 30.0168  -2
 -11   3   2 64.2275 30.0168   1
   9  12  11 45.0210 27.0216  -2
 -10   3   2 45.0210 27.0216   1
   8  11  10 274.949 30.4820  -2
  -9   3   2 274.949 30.4820   1
   7  10   9 -33.004 112.794  -2
  -8   3   2 -33.004 112.794   1
  -7   3   2 -4.5599 5.71818   1
  -6   3   2 114.918 14.7816   1
  -5   3   2 491.247 17.8298   1
  -4   3   2 155.859 13.2230   1
  -3   3   2 215.920 12.8496   1
   2   5   4 1956.05 123.114  -2
  -2   3   2 1956.05 123.114   1
   1   4   3 1850.84 67.3672  -2
  -1   3   2 1850.84 67.3672   1
   0   3   2 817.028 36.8425  -2
   0   3   2 817.028 36.8425   1
  -1   2   1 8100.06 251.697  -2
   1   3   2 8100.06 251.697   1
  -2   1   0 1358.49 26.7022  -2
   2   3   2 1358.49 26.7022   1
   3   0   1 1569.26 30.0726  -2
   3   3   2 1569.26 30.0726   1
   4   1   2 1309.82 42.6681  -2
   4   3   2 1309.82 42.6681   1
   5   2   3 792.888 27.6288  -2
   5   3   2 792.888 27.6288   1
   6   3   4 495.688 24.6900  -2
   6   3   2 495.688 24.6900   1
   7   4   5 99.8891 18.0592  -2
   7   3   2 99.8891 18.0592   1
   8   5   6 27.8857 19.7072  -2
   8   3   2 27.8857 19.7072   1
   9   6   7 114.448 26.8257  -2
   9   3   2 114.448 26.8257   1
  10   3   2 22.2884 9.59307   1
  11   3   2 21.4688 14.7843   1
  12   3   2 112.787 18.6447   1
  13   3   2 47.8529 16.8322   1
  13  10  11 -32.095 50.5948  -2
  14   3   2 -32.095 50.5948   1
   9  13  11 111.932 30.2350  -2
 -10   4   2 111.932 30.2350   1
   8  12  10 146.518 29.9640  -2
  -9   4   2 146.518 29.9640   1
   7  11   9 -32.650 114.606  -2
  -8   4   2 -32.650 114.606   1
  -7   4   2 435.400 25.7468   1
   5   9   7 28.3074 103.668  -2
  -6   4   2 28.3074 103.668   1
  -5   4   2 28.2415 4.68647   1
  -4   4   2 1085.25 34.5618   1
  -2   4   2 338.240 16.6285   1
  -1   4   2 474.740 18.8676   1
   0   4   2 -6.5161 21.1343  -2
   0   4   2 -6.5161 21.1343   1
  -1   3   1 11.5247 19.5652  -2
   1   4   2 11.5247 19.5652   1
  -2   2   0 951.465 41.0097  -2
   2   4   2 951.465 41.0097   1
   3  -1   1 4013.12 69.2722  -2
   3   4   2 4013.12 69.2722   1
   4   0   2 63.7731 9.47151  -2
   4   4   2 63.7731 9.47151   1
   5   1   3 16.6990 12.7723  -2
   5   4   2 16.6990 12.7723   1
   6   2   4 314.103 18.0592  -2
   6   4   2 314.103 18.0592   1
   7   3   5 264.152 21.0124  -2
   7   4   2 264.152 21.0124   1
   8   4   6 313.062 22.2117  -2
   8   4   2 313.062 22.2117   1
   9   5   7 799.488 34.0138  -2
   9   4   2 799.488 34.0138   1
  10   6   8 937.698 60.8234  -2
  10   4   2 937.698 60.8234   1
  11   7   8 295.037 83.1841  -2
  11   4   2 295.037 83.1841   1
  12   4   2 -7.0225 13.9032   1
  13   4   2 99.6510 27.6053   1
  14   4   2 37.2901 17.6555   1
   9  14  11 95.7878 47.5167  -2
 -10   5   2 95.7878 47.5167   1
   8  13  10 362.733 34.7775  -2
  -9   5   2 362.733 34.7775   1
   7  12   9 882.308 44.0586  -2
  -8   5   2 882.308 44.0586   1
   6  11   8 156.891 40.2259  -2
  -7   5   2 156.891 40.2259   1
   5  10   7 188.718 34.6730  -2
  -6   5   2 188.718 34.6730   1
  -5   5   2 82.4724 14.6763   1
  -4   5   2 15.8050 6.03488   1
  -3   5   2 112.475 12.9918   1
  -2   5   2 1492.52 42.9507   1
  -1   5   2 161.022 13.7517   1
   0   5   2 -9.5161 24.9483  -2
   0   5   2 -9.5161 24.9483   1
  -1   4   1 457.124 32.8010  -2
   1   5   2 457.124 32.8010   1
  -2   3   0 93.5949 15.5323  -2
   2   5   2 93.5949 15.5323   1
   3  -2   1 81.8443 9.67463  -2
   3   5   2 81.8443 9.67463   1
   4  -1   2 2346.12 44.2713  -2
   4   5   2 2346.12 44.2713   1
   5   0   3 4294.75 75.8890  -2
   5   5   2 4294.75 75.8890   1
   6   1   4 1466.91 39.8470  -2
   6   5   2 1466.91 39.8470   1
   7   2   5 97.8390 15.4748  -2
   7   5   2 97.8390 15.4748   1
   8   3   6 193.253 26.6066  -2
   8   5   2 193.253 26.6066   1
   9   4   7 54.1236 21.3989  -2
   9   5   2 54.1236 21.3989   1
  10   5   8 12.2626 26.5810  -2
  10   5   2 12.2626 26.5810   1
  11   5   2 58.6510 19.1576   1
  12   7   9 -2.7749 40.8191  -2
  12   5   2 -2.7749 40.8191   1
  13   8  10 -37.496 41.9769  -2
  13   5   2 -37.496 41.9769   1
  14   8  11 256.352 39.0811  -2
  14   5   2 256.352 39.0811   1
   8  14  10 38.9921 45.8937  -2
  -9   6   2 38.9921 45.8937   1
   7  13   9 42.3844 28.9467  -2
  -8   6   2 42.3844 28.9467   1
   6  12   8 348.838 46.6230  -2
  -7   6   2 348.838 46.6230   1
   5  11   7 96.4584 34.4964  -2
  -6   6   2 96.4584 34.4964   1
   4  10   6 7.39961 101.389  -2
  -5   6   2 7.39961 101.389   1
  -4   6   2 38.2429 6.64961   1
  -3   6   2 0.37907 5.32376   1
  -2   6   2 126.509 22.6211   1
  -1   6   2 111.650 13.7291   1
   0   6   2 115.814 12.2534   1
  -1   5   1 1134.43 55.1825  -2
   1   6   2 1134.43 55.1825   1
  -2   4   0 761.629 29.1827  -2
   2   6   2 761.629 29.1827   1
   3  -3   1 1258.72 27.8974  -2
   3   6   2 1258.72 27.8974   1
   4  -2   2 415.185 15.5593  -2
   4   6   2 415.185 15.5593   1
   5  -1   3 228.782 14.8580  -2
   5   6   2 228.782 14.8580   1
   6   0   4 935.517 24.6345  -2
   6   6   2 935.517 24.6345   1
   7   1   5 492.625 24.4866  -2
   7   6   2 492.625 24.4866   1
   8   2   6 -16.987 15.9280  -2
   8   6   2 -16.987 15.9280   1
   9   3   7 500.804 28.9932  -2
   9   6   2 500.804 28.9932   1
  10   4   8 73.0030 36.6512  -2
  10   6   2 73.0030 36.6512   1
  12   6   9 -57.186 42.1142  -2
  12   6   2 -57.186 42.1142   1
  13   7  10 70.1467 45.1062  -2
  13   6   2 70.1467 45.1062   1
  14   8  11 77.9277 50.6005  -2
  14   6   2 77.9277 50.6005   1
   7  14   9 89.5645 44.3548  -2
  -8   7   2 89.5645 44.3548   1
   6  13   8 163.019 43.7866  -2
  -7   7   2 163.019 43.7866   1
   5  12   7 11.5291 35.0601  -2
  -6   7   2 11.5291 35.0601   1
   4  11   6 -7.1403 33.0512  -2
  -5   7   2 -7.1403 33.0512   1
   3  10   5 31.4647 99.6163  -2
  -4   7   2 31.4647 99.6163   1
   2   9   4 828.614 118.088  -2
  -3   7   2 828.614 118.088   1
  -2   7   2 1191.82 36.7767   1
  -1   7   2 1033.79 35.4015   1
   0   7   2 43.1661 9.79942   1
   1   7   2 744.948 28.0507   1
  -2   5   0 3123.80 80.3272  -2
   2   7   2 3123.80 80.3272   1
   3  -4   1 700.865 26.0189  -2
   3   7   2 700.865 26.0189   1
   4  -3   2 159.051 14.5689  -2
   4   7   2 159.051 14.5689   1
   5  -2   3 988.270 25.8742  -2
   5   7   2 988.270 25.8742   1
   6  -1   4 456.796 18.6955  -2
   6   7   2 456.796 18.6955   1
   7   0   5 3.02875 12.8637  -2
   7   7   2 3.02875 12.8637   1
   8   1   6 86.9731 21.4312  -2
   8   7   2 86.9731 21.4312   1
   9   2   7 -2.8083 19.1078  -2
   9   7   2 -2.8083 19.1078   1
  12   5   9 147.035 49.2021  -2
  12   7   2 147.035 49.2021   1
  13   6  10 19.2935 46.0336  -2
  13   7   2 19.2935 46.0336   1
  14   7  11 190.176 55.6471  -2
  14   7   2 190.176 55.6471   1
   5  13   7 159.373 43.3536  -2
  -6   8   2 159.373 43.3536   1
   4  12   6 8.13068 36.1575  -2
  -5   8   2 8.13068 36.1575   1
   3  11   5 211.662 112.276  -2
  -4   8   2 211.662 112.276   1
   2  10   4 432.057 118.710  -2
  -3   8   2 432.057 118.710   1
   1   9   3 61.5726 88.8994  -2
  -2   8   2 61.5726 88.8994   1
  -1   8   2 289.023 19.6076   1
   0   8   2 6.13820 5.97765   1
   1   8   2 147.765 16.5528   1
   2   8   2 309.871 20.6101   1
   3  -5   1 290.249 34.6293  -2
   3   8   2 290.249 34.6293   1
   4  -4   2 394.315 19.9384  -2
   4   8   2 394.315 19.9384   1
   5  -3   3 432.772 21.0421  -2
   5   8   2 432.772 21.0421   1
   6  -2   4 502.194 21.3237  -2
   6   8   2 502.194 21.3237   1
   7  -1   5 201.758 16.6684  -2
   7   8   2 201.758 16.6684   1
   8   0   6 36.7579 19.3270  -2
   8   8   2 36.7579 19.3270   1
   9   1   7 1126.35 43.2046  -2
   9   8   2 1126.35 43.2046   1
  10   2   8 994.950 55.9909  -2
  10   8   2 994.950 55.9909   1
  13   5  10 178.708 54.4706  -2
  13   8   2 178.708 54.4706   1
  14   6  11 147.391 58.1652  -2
  14   8   2 147.391 58.1652   1
  -6   9   2 102.922 32.8787   1
   4  13   6 315.283 46.9011  -2
  -5   9   2 315.283 46.9011   1
   3  12   5 27.6232 39.4835  -2
  -4   9   2 27.6232 39.4835   1
   2  11   4 -60.850 112.521  -2
  -3   9   2 -60.850 112.521   1
   1  10   3 -38.421 98.2066  -2
  -2   9   2 -38.421 98.2066   1
  -1   9   2 6.43446 6.09765   1
   0   9   2 176.067 18.9745   1
   1   9   2 204.579 19.1023   1
   2   9   2 99.6599 16.2642   1
   3   9   2 12.0395 6.18824   1
   4  -5   2 469.333 25.9082  -2
   4   9   2 469.333 25.9082   1
   5  -4   3 863.335 29.9868  -2
   5   9   2 863.335 29.9868   1
   6  -3   4 102.225 18.8486  -2
   6   9   2 102.225 18.8486   1
   7  -2   5 284.892 19.9442  -2
   7   9   2 284.892 19.9442   1
   8  -1   6 512.836 33.2677  -2
   8   9   2 512.836 33.2677   1
   9   0   7 221.273 30.0247  -2
   9   9   2 221.273 30.0247   1
  10   1   8 29.2037 33.0746  -2
  10   9   2 29.2037 33.0746   1
  11   2   9 151.959 37.5052  -2
  11   9   2 151.959 37.5052   1
  -6  10   2 12.9868 13.5728   1
  -5  10   2 -6.4851 11.4527   1
  -4  10   2 3.96252 10.7168   1
  -3  10   2 7.77401 7.74796   1
  -2  10   2 3.78875 7.52875   1
  -1  10   2 29.4500 8.66369   1
   0  10   2 12.5176 8.10674   1
   1  10   2 63.0234 13.0849   1
   2  10   2 723.397 32.6394   1
   3  10   2 976.622 28.9306   1
   4  10   2 141.660 14.8160   1
   5  -5   3 -28.349 26.2760  -2
   5  10   2 -28.349 26.2760   1
   6  -4   4 132.504 34.4531  -2
   6  10   2 132.504 34.4531   1
   7  -3   5 174.366 19.8761  -2
   7  10   2 174.366 19.8761   1
   8  -2   6 95.3725 28.5063  -2
   8  10   2 95.3725 28.5063   1
   9  -1   7 201.167 30.7993  -2
   9  10   2 201.167 30.7993   1
  10   0   8 236.497 39.0071  -2
  10  10   2 236.497 39.0071   1
  11   1   9 33.1787 37.0624  -2
  11  10   2 33.1787 37.0624   1
  13  10   2 -9.8988 20.9695   1
  -3  11   2 144.380 32.8074   1
  -2  11   2 594.019 45.8872   1
  -1  11   2 96.3966 21.2467   1
  -1  10   1 -14.788 92.0758  -2
   0  11   2 -14.788 92.0758   1
   1  11   2 175.456 21.8240   1
   2  11   2 216.537 23.3523   1
   3  11   2 -3.6415 7.47545   1
   4  11   2 0.38867 12.1859   1
   5  -6   3 -0.2406 22.1894  -2
   5  11   2 -0.2406 22.1894   1
   6  -5   4 36.0345 24.3315  -2
   6  11   2 36.0345 24.3315   1
   7  -4   5 599.697 29.9127  -2
   7  11   2 599.697 29.9127   1
   8  -3   6 93.6455 28.7246  -2
   8  11   2 93.6455 28.7246   1
   9  -2   7 2.64827 32.4455  -2
   9  11   2 2.64827 32.4455   1
  10  -1   8 38.6415 49.1152  -2
  10  11   2 38.6415 49.1152   1
  11   0   9 266.221 58.0073  -2
  11  11   2 266.221 58.0073   1
  12   1  10 22.8453 53.9816  -2
  12  11   2 22.8453 53.9816   1
  -3  12   2 50.7665 20.6106   1
  -2  12   2 -8.9244 10.4741   1
  -1  12   2 132.967 31.9989   1
   0  12   2 131.310 23.5742   1
  -2  11   1 138.661 49.9072  -2
   1  12   2 138.661 49.9072   1
  -3  10   0 57.9071 47.5851  -2
   2  12   2 57.9071 47.5851   1
   4  -9   1 61.9739 43.5504  -2
   3  12   2 61.9739 43.5504   1
   4  12   2 3.22720 8.84328   1
   5  12   2 54.3961 11.8227   1
   6  -6   4 383.672 44.5965  -2
   6  12   2 383.672 44.5965   1
   7  -5   5 458.966 50.9427  -2
   7  12   2 458.966 50.9427   1
   8  -4   6 -7.5364 42.8277  -2
   8  12   2 -7.5364 42.8277   1
   9  -3   7 65.7120 46.5658  -2
   9  12   2 65.7120 46.5658   1
  10  -2   8 124.942 52.0510  -2
  10  12   2 124.942 52.0510   1
  11  -1   9 2.22055 55.8106  -2
  11  12   2 2.22055 55.8106   1
  -1  13   2 19.3643 13.4725   1
   0  13   2 3.50991 11.9713   1
   1  13   2 16.6033 11.4740   1
  -3  11   0 236.494 54.0184  -2
   2  13   2 236.494 54.0184   1
   4 -10   1 114.941 48.1445  -2
   3  13   2 114.941 48.1445   1
   5  -9   2 190.002 48.2246  -2
   4  13   2 190.002 48.2246   1
   6  -8   3 150.866 46.9768  -2
   5  13   2 150.866 46.9768   1
   6  13   2 38.9813 16.3037   1
   7  -6   5 97.6291 42.2844  -2
   7  13   2 97.6291 42.2844   1
   8  13   2 270.620 31.3854   1
   9  -4   7 76.1292 50.8093  -2
   9  13   2 76.1292 50.8093   1
  10  -3   8 -53.563 51.9561  -2
  10  13   2 -53.563 51.9561   1
  11  -2   9 -58.392 54.8573  -2
  11  13   2 -58.392 54.8573   1
   2  14   2 112.221 35.3515   1
   4 -11   1 398.715 42.4650  -2
   3  14   2 398.715 42.4650   1
   5 -10   2 221.968 53.6728  -2
   4  14   2 221.968 53.6728   1
   6  -9   3 99.6262 47.6305  -2
   5  14   2 99.6262 47.6305   1
   7  -8   4 200.840 50.8408  -2
   6  14   2 200.840 50.8408   1
   7  14   2 1.52193 15.7872   1
   8  14   2 -13.738 17.6729   1
   9  -5   7 -13.338 52.6968  -2
   9  14   2 -13.338 52.6968   1
  10  -4   8 -6.1445 54.6508  -2
  10  14   2 -6.1445 54.6508   1
   2  15   2 43.8723 21.1015   1
   3  15   2 19.4358 11.5688   1
   5 -11   2 79.2879 54.7480  -2
   4  15   2 79.2879 54.7480   1
   6 -10   3 76.0712 37.5584  -2
   5  15   2 76.0712 37.5584   1
   7  -9   4 164.171 51.9631  -2
   6  15   2 164.171 51.9631   1
   7  15   2 -16.561 14.5298   1
   8  15   2 25.5134 19.0136   1
  -3 -14   3 -0.6164 75.4166   1
   8  -5  11 47.9062 37.9550  -2
  -8 -13   3 47.9062 37.9550   1
   7  -6  10 98.0342 125.171  -2
  -7 -13   3 98.0342 125.171   1
   6  -7   9 140.156 38.9131  -2
  -6 -13   3 140.156 38.9131   1
   5  -8   8 133.160 126.981  -2
  -5 -13   3 133.160 126.981   1
   4  -9   7 210.887 137.354  -2
  -4 -13   3 210.887 137.354   1
   3 -10   6 628.458 64.9006  -2
  -3 -13   3 628.458 64.9006   1
   3 -11   5 419.776 57.5866  -2
  -2 -13   3 419.776 57.5866   1
   2 -12   4 255.596 55.1830  -2
  -1 -13   3 255.596 55.1830   1
   1 -12   4 -114.92 121.764  -2
   0 -13   3 -114.92 121.764   1
  10  -2  13 -46.495 47.9334  -2
 -10 -12   3 -46.495 47.9334   1
   9  -3  12 56.5153 28.3659  -2
  -9 -12   3 56.5153 28.3659   1
   8  -4  11 118.578 30.9490  -2
  -8 -12   3 118.578 30.9490   1
   7  -5  10 71.3884 33.6464  -2
  -7 -12   3 71.3884 33.6464   1
   6  -6   9 79.9513 24.5484  -2
  -6 -12   3 79.9513 24.5484   1
   5  -7   8 212.514 26.7323  -2
  -5 -12   3 212.514 26.7323   1
   4  -8   7 215.396 25.4447  -2
  -4 -12   3 215.396 25.4447   1
   3  -9   6 97.9534 44.9069  -2
  -3 -12   3 97.9534 44.9069   1
   2 -11   4 66.7644 45.8964  -2
  -1 -12   3 66.7644 45.8964   1
   1 -12   3 69.0386 47.0479  -2
   0 -12   3 69.0386 47.0479   1
 -11 -11   3 246.558 35.8070   1
  10  -1  13 355.952 57.4269  -2
 -10 -11   3 355.952 57.4269   1
   9  -2  12 234.957 47.4790  -2
  -9 -11   3 234.957 47.4790   1
   8  -3  11 92.8432 26.7743  -2
  -8 -11   3 92.8432 26.7743   1
   7  -4  10 112.840 26.6048  -2
  -7 -11   3 112.840 26.6048   1
   6  -5   9 46.9287 25.7622  -2
  -6 -11   3 46.9287 25.7622   1
   5  -6   8 10.0548 20.6804  -2
  -5 -11   3 10.0548 20.6804   1
   4  -7   7 23.8327 20.4776  -2
  -4 -11   3 23.8327 20.4776   1
   3  -8   6 82.1863 22.3790  -2
  -3 -11   3 82.1863 22.3790   1
   2  -9   5 89.0414 44.0762  -2
  -2 -11   3 89.0414 44.0762   1
   1 -10   4 44.5492 45.1573  -2
  -1 -11   3 44.5492 45.1573   1
   0 -11   3 6.26965 15.3026   1
   1 -11   3 -2.4787 16.1266   1
   3  14   0 -120.93 147.134  -2
   4 -11   3 -120.93 147.134   1
 -11 -10   3 -4.3600 18.9858   1
  10   0  13 145.738 57.1118  -2
 -10 -10   3 145.738 57.1118   1
   9  -1  12 -18.489 32.0553  -2
  -9 -10   3 -18.489 32.0553   1
   8  -2  11 12.6962 28.4425  -2
  -8 -10   3 12.6962 28.4425   1
   7  -3  10 -10.057 20.8393  -2
  -7 -10   3 -10.057 20.8393   1
   6  -4   9 5.03938 17.4950  -2
  -6 -10   3 5.03938 17.4950   1
   5  -5   8 212.725 21.8290  -2
  -5 -10   3 212.725 21.8290   1
   4  -6   7 -3.9357 14.8586  -2
  -4 -10   3 -3.9357 14.8586   1
   3  -7   6 109.712 15.3330  -2
  -3 -10   3 109.712 15.3330   1
   2  -8   5 600.044 26.4605  -2
  -2 -10   3 600.044 26.4605   1
   1  -9   4 495.714 21.9596  -2
  -1 -10   3 495.714 21.9596   1
   0 -10   3 39.1617 44.4301  -2
   0 -10   3 39.1617 44.4301   1
   1 -10   3 347.388 42.6057   1
   2 -10   3 559.540 50.9009   1
   3 -10   3 58.6993 20.2782   1
   3  13   0 -23.784 130.351  -2
   4 -10   3 -23.784 130.351   1
   5  15   2 157.624 51.4604  -2
   6 -10   3 157.624 51.4604   1
  12   3  14 -39.614 71.4812  -2
 -12  -9   3 -39.614 71.4812   1
  11   2  13 10.6857 54.4680  -2
 -11  -9   3 10.6857 54.4680   1
  10   1  13 132.224 57.3633  -2
 -10  -9   3 132.224 57.3633   1
   9   0  12 108.797 39.0485  -2
  -9  -9   3 108.797 39.0485   1
   8  -1  11 15.0935 24.4716  -2
  -8  -9   3 15.0935 24.4716   1
   7  -2  10 129.046 23.8471  -2
  -7  -9   3 129.046 23.8471   1
   6  -3   9 185.782 15.3385  -2
  -6  -9   3 185.782 15.3385   1
   5  -4   8 103.081 14.6946  -2
  -5  -9   3 103.081 14.6946   1
   4  -5   7 252.782 16.4713  -2
  -4  -9   3 252.782 16.4713   1
   3  -6   6 453.366 17.9974  -2
  -3  -9   3 453.366 17.9974   1
   2  -7   5 61.5459 12.3953  -2
  -2  -9   3 61.5459 12.3953   1
   1  -8   4 169.312 14.0530  -2
  -1  -9   3 169.312 14.0530   1
   0  -9   3 626.782 25.1634  -2
   0  -9   3 626.782 25.1634   1
  -1 -10   2 96.4883 48.5838  -2
   1  -9   3 96.4883 48.5838   1
   2  -9   3 36.7923 17.8258   1
   3  -9   3 21.0184 16.6508   1
   4  -9   3 21.8602 17.2652   1
   5  -9   3 17.8095 16.4845   1
   5  14   2 84.7115 47.3835  -2
   6  -9   3 84.7115 47.3835   1
  12   4  14 -34.229 75.1099  -2
 -12  -8   3 -34.229 75.1099   1
  11   3  13 -2.4179 68.6254  -2
 -11  -8   3 -2.4179 68.6254   1
  10   2  13 167.726 50.0326  -2
 -10  -8   3 167.726 50.0326   1
   9   1  12 229.318 30.2845  -2
  -9  -8   3 229.318 30.2845   1
   8   0  11 35.1881 24.9982  -2
  -8  -8   3 35.1881 24.9982   1
   7  -1  10 238.872 25.8642  -2
  -7  -8   3 238.872 25.8642   1
   6  -2   9 670.182 25.1717  -2
  -6  -8   3 670.182 25.1717   1
   5  -3   8 1292.25 38.6218  -2
  -5  -8   3 1292.25 38.6218   1
   4  -4   7 1329.39 28.4641  -2
  -4  -8   3 1329.39 28.4641   1
   3  -5   6 208.794 13.7700  -2
  -3  -8   3 208.794 13.7700   1
   2  -6   5 11.5979 10.0462  -2
  -2  -8   3 11.5979 10.0462   1
   1  -7   4 0.67733 10.7323  -2
  -1  -8   3 0.67733 10.7323   1
   0  -8   3 132.101 11.8551  -2
   0  -8   3 132.101 11.8551   1
  -1  -9   2 251.263 20.5267  -2
   1  -8   3 251.263 20.5267   1
  -2 -10   1 559.413 28.7596  -2
   2  -8   3 559.413 28.7596   1
   3  -8   3 351.546 41.5990   1
   4  -8   3 57.1066 18.7892   1
   5  -8   3 53.7460 19.2268   1
   5  13   2 68.9453 43.8292  -2
   6  -8   3 68.9453 43.8292   1
  12   5  15 3.26957 57.8511  -2
 -13  -7   3 3.26957 57.8511   1
 -12  -7   3 147.196 33.7774   1
  11   4  13 251.598 78.8486  -2
 -11  -7   3 251.598 78.8486   1
  10   3  12 201.217 39.1186  -2
 -10  -7   3 201.217 39.1186   1
   9   2  12 619.983 45.9917  -2
  -9  -7   3 619.983 45.9917   1
   8   1  11 240.410 27.6148  -2
  -8  -7   3 240.410 27.6148   1
   7   0  10 23.8383 38.5852  -2
  -7  -7   3 23.8383 38.5852   1
   6  -1   9 156.140 17.7702  -2
  -6  -7   3 156.140 17.7702   1
   5  -2   8 29.8452 14.1219  -2
  -5  -7   3 29.8452 14.1219   1
   4  -3   7 145.313 11.0460  -2
  -4  -7   3 145.313 11.0460   1
   3  -4   6 62.8489 9.76477  -2
  -3  -7   3 62.8489 9.76477   1
   2  -5   5 331.457 15.1579  -2
  -2  -7   3 331.457 15.1579   1
   1  -6   4 39.8861 9.20856  -2
  -1  -7   3 39.8861 9.20856   1
   0  -7   3 194.745 13.0990  -2
   0  -7   3 194.745 13.0990   1
  -1  -8   2 25.8583 34.4115  -2
   1  -7   3 25.8583 34.4115   1
  -2  -9   1 209.619 22.5962  -2
   2  -7   3 209.619 22.5962   1
   3  10   0 1356.36 56.9011  -2
   3  -7   3 1356.36 56.9011   1
   4  -7   3 70.8617 13.6319   1
   5  -7   3 7.48603 14.8787   1
   6  -7   3 588.214 48.5455   1
   6  13   3 266.585 48.2575  -2
   7  -7   3 266.585 48.2575   1
  12   6  15 495.691 52.2733  -2
 -13  -6   3 495.691 52.2733   1
  11   5  14 401.242 49.3364  -2
 -12  -6   3 401.242 49.3364   1
 -11  -6   3 4.77841 36.6034   1
  10   4  12 -22.205 68.7889  -2
 -10  -6   3 -22.205 68.7889   1
  -9  -6   3 -0.1261 8.54067   1
   8   2  11 216.151 35.8962  -2
  -8  -6   3 216.151 35.8962   1
   7   1  10 156.630 23.3827  -2
  -7  -6   3 156.630 23.3827   1
   6   0   9 341.629 23.5493  -2
  -6  -6   3 341.629 23.5493   1
   5  -1   8 687.396 22.0969  -2
  -5  -6   3 687.396 22.0969   1
   4  -2   7 636.869 17.3317  -2
  -4  -6   3 636.869 17.3317   1
   3  -3   6 125.117 9.22881  -2
  -3  -6   3 125.117 9.22881   1
   2  -4   5 711.494 18.0647  -2
  -2  -6   3 711.494 18.0647   1
   1  -5   4 1584.61 30.4072  -2
  -1  -6   3 1584.61 30.4072   1
   0  -6   3 -0.8972 9.50244  -2
   0  -6   3 -0.8972 9.50244   1
  -1  -7   2 1004.92 33.4015  -2
   1  -6   3 1004.92 33.4015   1
  -2  -8   1 276.007 19.8041  -2
   2  -6   3 276.007 19.8041   1
   3   9   0 -43.502 33.4871  -2
   3  -6   3 -43.502 33.4871   1
   4  10   1 179.232 27.0286  -2
   4  -6   3 179.232 27.0286   1
   5  -6   3 -12.870 9.42064   1
   7  -6   3 -18.601 14.3915   1
  12   7  15 277.404 94.5068  -2
 -13  -5   3 277.404 94.5068   1
  11   6  14 95.8123 54.3937  -2
 -12  -5   3 95.8123 54.3937   1
  10   5  13 249.030 43.6294  -2
 -11  -5   3 249.030 43.6294   1
 -10  -5   3 291.102 23.8772   1
   9   4  11 134.848 61.4415  -2
  -9  -5   3 134.848 61.4415   1
  -8  -5   3 -3.7058 9.39679   1
   7   2  10 246.964 53.7030  -2
  -7  -5   3 246.964 53.7030   1
   6   1   9 177.429 24.9981  -2
  -6  -5   3 177.429 24.9981   1
   5   0   8 695.418 24.7383  -2
  -5  -5   3 695.418 24.7383   1
   4  -1   7 353.036 12.6177  -2
  -4  -5   3 353.036 12.6177   1
   3  -2   6 134.996 9.46081  -2
  -3  -5   3 134.996 9.46081   1
   2  -3   5 697.925 16.0357  -2
  -2  -5   3 697.925 16.0357   1
   1  -4   4 1443.74 31.8497  -2
  -1  -5   3 1443.74 31.8497   1
   0  -5   3 3076.40 60.1249  -2
   0  -5   3 3076.40 60.1249   1
  -1  -6   2 470.104 20.1750  -2
   1  -5   3 470.104 20.1750   1
  -2  -7   1 300.075 18.7875  -2
   2  -5   3 300.075 18.7875   1
   3   8   0 887.999 32.8888  -2
   3  -5   3 887.999 32.8888   1
   4   9   1 216.322 22.8907  -2
   4  -5   3 216.322 22.8907   1
   5  10   2 3.59942 99.7113  -2
   5  -5   3 3.59942 99.7113   1
   6  11   3 -26.811 109.893  -2
   6  -5   3 -26.811 109.893   1
   7  -5   3 485.177 28.7619   1
   7  12   4 284.509 128.991  -2
   8  -5   3 284.509 128.991   1
  12   8  15 11.5755 85.3920  -2
 -13  -4   3 11.5755 85.3920   1
  11   7  14 105.313 84.3871  -2
 -12  -4   3 105.313 84.3871   1
  10   6  13 187.442 43.0346  -2
 -11  -4   3 187.442 43.0346   1
 -10  -4   3 15.6604 9.37879   1
  -9  -4   3 207.845 21.1747   1
  -8  -4   3 124.660 16.9543   1
  -7  -4   3 3.03968 6.05758   1
   6   2   9 938.644 74.0811  -2
  -6  -4   3 938.644 74.0811   1
   5   1   8 1620.42 41.9986  -2
  -5  -4   3 1620.42 41.9986   1
   4   0   7 813.450 18.3393  -2
  -4  -4   3 813.450 18.3393   1
   3  -1   6 100.948 8.34094  -2
  -3  -4   3 100.948 8.34094   1
   2  -2   5 456.311 12.2301  -2
  -2  -4   3 456.311 12.2301   1
   1  -3   4 34.0358 7.42965  -2
  -1  -4   3 34.0358 7.42965   1
   0  -4   3 72.1215 10.6555  -2
   0  -4   3 72.1215 10.6555   1
  -1  -5   2 381.286 17.4781  -2
   1  -4   3 381.286 17.4781   1
  -2  -6   1 2013.75 51.5958  -2
   2  -4   3 2013.75 51.5958   1
   3   7   0 477.826 22.4969  -2
   3  -4   3 477.826 22.4969   1
   4   8   1 81.0781 17.9051  -2
   4  -4   3 81.0781 17.9051   1
   5   9   2 609.733 107.933  -2
   5  -4   3 609.733 107.933   1
   6  -4   3 170.290 11.3988   1
   7  -4   3 106.909 12.0523   1
   8  -4   3 212.874 16.8569   1
  12   9  15 70.5968 90.2033  -2
 -13  -3   3 70.5968 90.2033   1
  10   7  13 208.834 41.4537  -2
 -11  -3   3 208.834 41.4537   1
   9   6  12 123.977 40.6237  -2
 -10  -3   3 123.977 40.6237   1
  -9  -3   3 -3.1238 7.91752   1
  -8  -3   3 399.910 22.1250   1
  -7  -3   3 73.9927 13.3397   1
  -6  -3   3 4.50649 5.16078   1
   5   2   8 69.1927 37.9337  -2
  -5  -3   3 69.1927 37.9337   1
   4   1   7 52.6400 13.8682  -2
  -4  -3   3 52.6400 13.8682   1
   3   0   6 120.233 8.08131  -2
  -3  -3   3 120.233 8.08131   1
   2  -1   5 224.449 8.54301  -2
  -2  -3   3 224.449 8.54301   1
   1  -2   4 4882.61 72.1930  -2
  -1  -3   3 4882.61 72.1930   1
   0  -3   3 5430.63 119.456  -2
   0  -3   3 5430.63 119.456   1
  -1  -4   2 1662.37 42.0257  -2
   1  -3   3 1662.37 42.0257   1
  -2  -5   1 36.6596 6.82512  -2
   2  -3   3 36.6596 6.82512   1
   3   6   0 730.843 19.2350  -2
   3  -3   3 730.843 19.2350   1
   4   7   1 103.906 9.63110  -2
   4  -3   3 103.906 9.63110   1
   5   8   2 402.057 18.5967  -2
   5  -3   3 402.057 18.5967   1
   6  -3   3 82.0779 9.29922   1
   7  -3   3 21.0040 4.59740   1
   8  -3   3 5.28883 5.45152   1
   9  -3   3 0.69076 5.93879   1
  10  -3   3 5.14759 9.60587   1
  12  10  15 261.257 45.9850  -2
 -13  -2   3 261.257 45.9850   1
  11   9  14 260.623 43.0497  -2
 -12  -2   3 260.623 43.0497   1
  10   8  13 34.7368 75.6770  -2
 -11  -2   3 34.7368 75.6770   1
   9   7  12 24.3387 37.1829  -2
 -10  -2   3 24.3387 37.1829   1
  -9  -2   3 -1.7237 7.89463   1
  -8  -2   3 9.46309 5.32855   1
  -7  -2   3 2.80913 4.42411   1
  -6  -2   3 1553.56 34.5271   1
  -5  -2   3 2621.35 50.4512   1
   4   2   7 1799.63 43.6643  -2
  -4  -2   3 1799.63 43.6643   1
   3   1   6 278.550 9.78996  -2
  -3  -2   3 278.550 9.78996   1
   2   0   5 865.119 16.4865  -2
  -2  -2   3 865.119 16.4865   1
   1  -1   4 2712.08 46.8124  -2
  -1  -2   3 2712.08 46.8124   1
   0  -2   3 68.4402 8.95480  -2
   0  -2   3 68.4402 8.95480   1
  -1  -3   2 2120.10 46.2857  -2
   1  -2   3 2120.10 46.2857   1
  -2  -4   1 1349.61 35.1316  -2
   2  -2   3 1349.61 35.1316   1
   3   5   0 1234.35 34.1799  -2
   3  -2   3 1234.35 34.1799   1
   4   6   1 1801.13 31.7220  -2
   4  -2   3 1801.13 31.7220   1
   5   7   2 1134.96 28.6974  -2
   5  -2   3 1134.96 28.6974   1
   6  -2   3 294.145 13.4464   1
   7   9   4 -68.550 88.2926  -2
   7  -2   3 -68.550 88.2926   1
   8  -2   3 301.209 17.4704   1
   9  -2   3 72.1544 14.1828   1
  10  -2   3 3.04968 6.36915   1
  11  -2   3 128.179 30.7129   1
  12  11  15 305.957 48.5370  -2
 -13  -1   3 305.957 48.5370   1
  11  10  14 198.231 44.4058  -2
 -12  -1   3 198.231 44.4058   1
  10   9  13 58.4156 34.1072  -2
 -11  -1   3 58.4156 34.1072   1
   9   8  12 16.2804 24.0518  -2
 -10  -1   3 16.2804 24.0518   1
  -9  -1   3 3.36467 6.02771   1
  -8  -1   3 663.377 23.1583   1
  -7  -1   3 498.242 18.5449   1
  -6  -1   3 279.138 13.9639   1
  -5  -1   3 58.1276 8.39049   1
  -4  -1   3 1538.00 31.4271   1
   3   2   6 1354.40 26.2666  -2
  -3  -1   3 1354.40 26.2666   1
   2   1   5 680.387 14.1033  -2
  -2  -1   3 680.387 14.1033   1
   1   0   4 1579.59 20.7151  -2
  -1  -1   3 1579.59 20.7151   1
   0  -1   3 615.220 16.3733  -2
   0  -1   3 615.220 16.3733   1
  -1  -2   2 122.994 9.77245  -2
   1  -1   3 122.994 9.77245   1
  -2  -3   1 1544.07 34.9162  -2
   2  -1   3 1544.07 34.9162   1
   3   4   0 272.064 13.9890  -2
   3  -1   3 272.064 13.9890   1
   4   5   1 449.676 18.6156  -2
   4  -1   3 449.676 18.6156   1
   5   6   2 159.649 10.7498  -2
   5  -1   3 159.649 10.7498   1
   6   7   3 2017.99 44.0863  -2
   6  -1   3 2017.99 44.0863   1
   7   8   4 709.260 39.1725  -2
   7  -1   3 709.260 39.1725   1
   8  -1   3 13.8442 4.71807   1
   9  -1   3 6.99106 6.36979   1
  10  -1   3 82.3389 14.6492   1
  11  -1   3 13.0703 8.59956   1
  11  12   8 306.579 47.6945  -2
  12  -1   3 306.579 47.6945   1
  12  13   9 93.1588 123.258  -2
  13  -1   3 93.1588 123.258   1
  11  11  14 310.936 34.6757  -2
 -12   0   3 310.936 34.6757   1
  10  10  13 85.4470 28.0765  -2
 -11   0   3 85.4470 28.0765   1
   9   9  12 67.6277 24.9254  -2
 -10   0   3 67.6277 24.9254   1
   8   8  11 552.835 36.0947  -2
  -9   0   3 552.835 36.0947   1
  -8   0   3 482.796 21.5754   1
  -7   0   3 3.45327 4.11547   1
  -6   0   3 3.74840 3.55415   1
  -5   0   3 85.7317 9.27471   1
  -4   0   3 86.9510 8.30539   1
  -3   0   3 106.926 7.32710   1
   2   2   5 566.343 20.7085  -2
  -2   0   3 566.343 20.7085   1
   1   1   4 880.426 19.3348  -2
  -1   0   3 880.426 19.3348   1
   0   0   3 135.991 9.17032  -2
   0   0   3 135.991 9.17032   1
  -1  -1   2 353.216 10.5277  -2
   1   0   3 353.216 10.5277   1
  -2  -2   1 3014.96 55.5817  -2
   2   0   3 3014.96 55.5817   1
   3   3   0 2907.84 54.5133  -2
   3   0   3 2907.84 54.5133   1
   4   4   1 3721.21 60.6051  -2
   4   0   3 3721.21 60.6051   1
   5   5   2 3839.08 63.5335  -2
   5   0   3 3839.08 63.5335   1
   6   6   3 1382.72 27.4978  -2
   6   0   3 1382.72 27.4978   1
   7   7   4 192.128 17.2037  -2
   7   0   3 192.128 17.2037   1
   8   8   5 -58.787 89.6459  -2
   8   0   3 -58.787 89.6459   1
   9   0   3 39.4041 12.2926   1
  10   0   3 16.2115 8.23930   1
  11   0   3 36.9543 12.8590   1
  12   0   3 -8.3505 14.1529   1
  12  12   9 321.551 47.6765  -2
  13   0   3 321.551 47.6765   1
  11  12  14 155.711 45.5028  -2
 -12   1   3 155.711 45.5028   1
  10  11  13 66.7104 28.6671  -2
 -11   1   3 66.7104 28.6671   1
   9  10  12 59.2420 27.0954  -2
 -10   1   3 59.2420 27.0954   1
   8   9  11 38.5195 20.2178  -2
  -9   1   3 38.5195 20.2178   1
   7   8  10 44.7705 34.8334  -2
  -8   1   3 44.7705 34.8334   1
  -7   1   3 13.6547 4.53411   1
  -6   1   3 14.0635 4.15365   1
  -5   1   3 236.217 12.4341   1
  -4   1   3 3.56688 2.90056   1
  -3   1   3 580.883 15.0477   1
   2   3   5 2134.59 71.1563  -2
  -2   1   3 2134.59 71.1563   1
   1   2   4 7035.31 178.657  -2
  -1   1   3 7035.31 178.657   1
   0   1   3 5940.98 185.067  -2
   0   1   3 5940.98 185.067   1
  -1   0   2 2878.79 92.2928  -2
   1   1   3 2878.79 92.2928   1
  -2  -1   1 518.506 13.1983  -2
   2   1   3 518.506 13.1983   1
   3   2   0 4066.78 61.2149  -2
   3   1   3 4066.78 61.2149   1
   4   3   1 374.609 10.5913  -2
   4   1   3 374.609 10.5913   1
   5   4   2 25.6069 8.70612  -2
   5   1   3 25.6069 8.70612   1
   6   5   3 183.755 19.0231  -2
   6   1   3 183.755 19.0231   1
   7   6   4 90.8785 17.4618  -2
   7   1   3 90.8785 17.4618   1
   8   7   5 154.533 35.7314  -2
   8   1   3 154.533 35.7314   1
   9   1   3 18.8030 8.30555   1
  10   1   3 6.28907 7.89670   1
  11   1   3 -3.2004 12.3243   1
  12   1   3 21.1364 15.3065   1
  13   1   3 63.8665 19.0024   1
  11  13  14 35.0764 41.7823  -2
 -12   2   3 35.0764 41.7823   1
  10  12  13 115.506 30.4547  -2
 -11   2   3 115.506 30.4547   1
   9  11  12 65.3429 26.9123  -2
 -10   2   3 65.3429 26.9123   1
   8  10  11 52.8994 24.8112  -2
  -9   2   3 52.8994 24.8112   1
   7   9  10 224.839 26.9920  -2
  -8   2   3 224.839 26.9920   1
  -7   2   3 4.22662 4.53610   1
  -6   2   3 138.496 11.9686   1
  -5   2   3 407.226 19.9862   1
  -4   2   3 29.1041 4.75934   1
  -3   2   3 303.435 14.9649   1
  -2   2   3 4558.04 104.388   1
   1   3   4 1691.81 50.2017  -2
  -1   2   3 1691.81 50.2017   1
   0   2   3 2463.87 82.3040  -2
   0   2   3 2463.87 82.3040   1
  -1   1   2 463.050 22.1354  -2
   1   2   3 463.050 22.1354   1
  -2   0   1 700.705 17.1689  -2
   2   2   3 700.705 17.1689   1
   3   1   0 180.882 10.1948  -2
   3   2   3 180.882 10.1948   1
   4   2   1 399.949 11.1922  -2
   4   2   3 399.949 11.1922   1
   5   3   2 568.499 22.3540  -2
   5   2   3 568.499 22.3540   1
   6   4   3 490.127 24.5326  -2
   6   2   3 490.127 24.5326   1
   7   5   4 73.9937 18.8680  -2
   7   2   3 73.9937 18.8680   1
   8   6   5 382.912 26.9819  -2
   8   2   3 382.912 26.9819   1
   9   7   6 62.7784 24.1839  -2
   9   2   3 62.7784 24.1839   1
  10   2   3 -6.6571 8.07250   1
  11   2   3 148.978 27.0403   1
  12   2   3 249.152 35.0076   1
  13   2   3 43.7097 17.0159   1
  14   2   3 42.0127 16.4042   1
  10  13  13 172.823 33.4969  -2
 -11   3   3 172.823 33.4969   1
   9  12  12 12.3461 27.0579  -2
 -10   3   3 12.3461 27.0579   1
   8  11  11 98.6287 27.8923  -2
  -9   3   3 98.6287 27.8923   1
   7  10  10 708.889 38.7666  -2
  -8   3   3 708.889 38.7666   1
   6   9   9 643.992 121.167  -2
  -7   3   3 643.992 121.167   1
  -6   3   3 607.502 27.4835   1
  -5   3   3 34.8382 5.47122   1
  -4   3   3 691.700 23.8686   1
  -2   3   3 323.366 15.5958   1
   1   4   4 305.494 26.0917  -2
  -1   3   3 305.494 26.0917   1
   0   3   3 30.0328 17.5009  -2
   0   3   3 30.0328 17.5009   1
  -1   2   2 496.619 27.7694  -2
   1   3   3 496.619 27.7694   1
  -2   1   1 1256.82 27.4543  -2
   2   3   3 1256.82 27.4543   1
   3   0   0 710.284 19.2909  -2
   3   3   3 710.284 19.2909   1
   4   1   1 554.316 22.4112  -2
   4   3   3 554.316 22.4112   1
   5   2   2 221.888 17.3203  -2
   5   3   3 221.888 17.3203   1
   6   3   3 594.885 23.5072  -2
   6   3   3 594.885 23.5072   1
   7   4   4 724.686 28.9109  -2
   7   3   3 724.686 28.9109   1
   8   5   5 299.854 24.4495  -2
   8   3   3 299.854 24.4495   1
   9   6   6 760.602 34.9741  -2
   9   3   3 760.602 34.9741   1
  10   7   7 961.925 42.2345  -2
  10   3   3 961.925 42.2345   1
  11   3   3 168.918 66.9885   1
  12   3   3 39.6890 44.1034   1
  13   3   3 50.6361 45.8371   1
  14   3   3 32.4552 17.2023   1
   9  13  12 255.917 52.8797  -2
 -10   4   3 255.917 52.8797   1
   8  12  11 731.024 41.4969  -2
  -9   4   3 731.024 41.4969   1
   7  11  10 808.793 41.6469  -2
  -8   4   3 808.793 41.6469   1
   6  10   9 111.068 39.3334  -2
  -7   4   3 111.068 39.3334   1
  -6   4   3 -4.0514 4.47930   1
  -5   4   3 2.33823 4.70713   1
  -4   4   3 -6.7324 4.34988   1
  -2   4   3 327.603 17.0494   1
  -1   4   3 172.963 12.1853   1
   0   4   3 433.623 30.5700  -2
   0   4   3 433.623 30.5700   1
  -1   3   2 2020.44 73.9602  -2
   1   4   3 2020.44 73.9602   1
  -2   2   1 1014.97 24.4540  -2
   2   4   3 1014.97 24.4540   1
  -3   1   0 136.104 11.3072  -2
   3   4   3 136.104 11.3072   1
   4   0   1 2416.17 45.1463  -2
   4   4   3 2416.17 45.1463   1
   5   1   2 1317.33 40.7732  -2
   5   4   3 1317.33 40.7732   1
   6   2   3 561.477 23.3550  -2
   6   4   3 561.477 23.3550   1
   7   3   4 87.1314 15.2637  -2
   7   4   3 87.1314 15.2637   1
   8   4   5 34.0379 16.9053  -2
   8   4   3 34.0379 16.9053   1
   9   5   6 41.8409 21.1560  -2
   9   4   3 41.8409 21.1560   1
  10   6   7 110.815 27.9398  -2
  10   4   3 110.815 27.9398   1
  11   7   8 118.384 46.1388  -2
  11   4   3 118.384 46.1388   1
  12   4   3 93.7332 17.5139   1
  13   4   3 25.2608 15.4001   1
  14   9  10 231.719 34.9388  -2
  14   4   3 231.719 34.9388   1
   8  13  11 103.701 30.8316  -2
  -9   5   3 103.701 30.8316   1
   7  12  10 232.902 32.0091  -2
  -8   5   3 232.902 32.0091   1
   6  11   9 172.209 28.8828  -2
  -7   5   3 172.209 28.8828   1
  -6   5   3 77.2805 9.79475   1
   4   9   7 -61.225 94.7513  -2
  -5   5   3 -61.225 94.7513   1
  -4   5   3 636.324 26.9347   1
  -3   5   3 207.411 16.5269   1
  -2   5   3 2.78623 4.08128   1
  -1   5   3 815.300 28.0540   1
   1   5   3 72.8120 14.5552   1
  -2   3   1 2549.69 91.4395  -2
   2   5   3 2549.69 91.4395   1
  -3   2   0 2894.04 57.2439  -2
   3   5   3 2894.04 57.2439   1
   4  -1   1 595.764 20.6500  -2
   4   5   3 595.764 20.6500   1
   5   0   2 180.402 13.5567  -2
   5   5   3 180.402 13.5567   1
   6   1   3 303.390 20.4626  -2
   6   5   3 303.390 20.4626   1
   7   2   4 105.391 16.5361  -2
   7   5   3 105.391 16.5361   1
   8   3   5 20.9219 18.4970  -2
   8   5   3 20.9219 18.4970   1
   9   4   6 1158.55 38.1936  -2
   9   5   3 1158.55 38.1936   1
  10   5   7 927.925 61.1910  -2
  10   5   3 927.925 61.1910   1
  12   7   8 -6.4407 39.2037  -2
  12   5   3 -6.4407 39.2037   1
  13   8   9 103.693 44.3345  -2
  13   5   3 103.693 44.3345   1
  14   9  10 116.979 44.9081  -2
  14   5   3 116.979 44.9081   1
   7  13  10 339.444 34.8115  -2
  -8   6   3 339.444 34.8115   1
   6  12   9 111.226 29.7489  -2
  -7   6   3 111.226 29.7489   1
   5  11   8 0.40593 33.7640  -2
  -6   6   3 0.40593 33.7640   1
   4  10   7 6.01674 103.712  -2
  -5   6   3 6.01674 103.712   1
   3   9   6 24.3048 97.2226  -2
  -4   6   3 24.3048 97.2226   1
  -3   6   3 705.191 27.6564   1
  -2   6   3 1964.64 50.9131   1
   0   6   3 7.45488 4.39313   1
   1   6   3 54.5090 8.63019   1
   2   6   3 110.595 13.2001   1
  -3   3   0 197.245 14.7855  -2
   3   6   3 197.245 14.7855   1
   4  -2   1 2499.13 55.0697  -2
   4   6   3 2499.13 55.0697   1
   5  -1   2 3055.30 57.5436  -2
   5   6   3 3055.30 57.5436   1
   6   0   3 1483.20 33.6592  -2
   6   6   3 1483.20 33.6592   1
   7   1   4 109.331 22.3598  -2
   7   6   3 109.331 22.3598   1
   8   2   5 192.242 21.2338  -2
   8   6   3 192.242 21.2338   1
   9   3   6 92.8249 19.0729  -2
   9   6   3 92.8249 19.0729   1
  10   4   7 222.594 41.0987  -2
  10   6   3 222.594 41.0987   1
  14   8  10 131.030 50.7627  -2
  14   6   3 131.030 50.7627   1
   6  13   9 173.246 46.3031  -2
  -7   7   3 173.246 46.3031   1
   5  12   8 12.0232 26.6549  -2
  -6   7   3 12.0232 26.6549   1
   4  11   7 -2.8224 33.9350  -2
  -5   7   3 -2.8224 33.9350   1
   3  10   6 194.198 105.953  -2
  -4   7   3 194.198 105.953   1
  -3   7   3 7.91475 5.57216   1
  -2   7   3 1.20861 5.33918   1
  -1   7   3 6.34819 5.62904   1
   0   7   3 32.1064 6.09311   1
   1   7   3 16.6512 4.76364   1
   2   7   3 61.7631 12.7755   1
  -3   4   0 1097.67 52.0892  -2
   3   7   3 1097.67 52.0892   1
   4  -3   1 258.122 16.3504  -2
   4   7   3 258.122 16.3504   1
   5  -2   2 364.328 18.4134  -2
   5   7   3 364.328 18.4134   1
   6  -1   3 2113.99 44.5332  -2
   6   7   3 2113.99 44.5332   1
   7   0   4 580.580 21.8821  -2
   7   7   3 580.580 21.8821   1
   8   1   5 -1.0588 19.0463  -2
   8   7   3 -1.0588 19.0463   1
   9   2   6 153.688 24.8357  -2
   9   7   3 153.688 24.8357   1
  10   3   7 756.318 59.4365  -2
  10   7   3 756.318 59.4365   1
  13   6   9 26.1467 45.5519  -2
  13   7   3 26.1467 45.5519   1
   5  13   8 368.359 49.4598  -2
  -6   8   3 368.359 49.4598   1
   4  12   7 102.911 40.6994  -2
  -5   8   3 102.911 40.6994   1
   3  11   6 28.8296 37.5629  -2
  -4   8   3 28.8296 37.5629   1
   2  10   5 -71.641 97.1251  -2
  -3   8   3 -71.641 97.1251   1
   1   9   4 312.239 100.543  -2
  -2   8   3 312.239 100.543   1
  -1   8   3 86.3856 14.7749   1
   0   8   3 0.14455 5.29345   1
   1   8   3 812.986 28.0169   1
   2   8   3 700.948 27.1437   1
  -3   5   0 592.407 41.4090  -2
   3   8   3 592.407 41.4090   1
   4  -4   1 7.69504 16.4174  -2
   4   8   3 7.69504 16.4174   1
   5  -3   2 43.7464 14.8009  -2
   5   8   3 43.7464 14.8009   1
   6  -2   3 475.140 22.4043  -2
   6   8   3 475.140 22.4043   1
   7  -1   4 358.734 20.5487  -2
   7   8   3 358.734 20.5487   1
   8   0   5 89.0473 24.8100  -2
   8   8   3 89.0473 24.8100   1
   9   1   6 29.9191 26.0063  -2
   9   8   3 29.9191 26.0063   1
  10   2   7 34.6231 34.2612  -2
  10   8   3 34.6231 34.2612   1
  13   5   9 87.6251 51.9427  -2
  13   8   3 87.6251 51.9427   1
  14   6  10 162.562 57.0446  -2
  14   8   3 162.562 57.0446   1
   4  13   7 94.4160 45.6048  -2
  -5   9   3 94.4160 45.6048   1
  -4   9   3 218.873 32.6563   1
   2  11   5 97.7221 111.920  -2
  -3   9   3 97.7221 111.920   1
   1  10   4 -88.093 98.5748  -2
  -2   9   3 -88.093 98.5748   1
  -1   9   3 214.551 20.3450   1
   0   9   3 490.060 24.8790   1
   1   9   3 81.4356 15.5943   1
   2   9   3 416.049 23.8052   1
   3   9   3 812.004 32.6763   1
   4   9   3 158.268 14.2884   1
   5  -4   2 49.5705 21.9043  -2
   5   9   3 49.5705 21.9043   1
   6  -3   3 -4.2227 22.5289  -2
   6   9   3 -4.2227 22.5289   1
   7  -2   4 50.7978 18.5078  -2
   7   9   3 50.7978 18.5078   1
   8  -1   5 269.167 20.4140  -2
   8   9   3 269.167 20.4140   1
   9   0   6 909.189 42.0137  -2
   9   9   3 909.189 42.0137   1
  10   1   7 329.850 39.9311  -2
  10   9   3 329.850 39.9311   1
  13   4   9 67.4661 56.3304  -2
  13   9   3 67.4661 56.3304   1
  14   9   3 49.2288 22.1001   1
   4  15   8 155.061 45.4258  -2
  -6  10   3 155.061 45.4258   1
   4  14   7 524.838 58.5942  -2
  -5  10   3 524.838 58.5942   1
   3  13   6 99.6281 44.7202  -2
  -4  10   3 99.6281 44.7202   1
   2  12   5 214.403 47.2152  -2
  -3  10   3 214.403 47.2152   1
  -2  10   3 33.6942 9.65628   1
  -1  10   3 10.2676 7.89618   1
   0  10   3 -6.2761 6.00635   1
   1  10   3 38.7553 8.18108   1
   2  10   3 19.9683 7.54231   1
   3  10   3 14.9935 7.74504   1
   4  10   3 96.3717 13.8809   1
   5  10   3 42.0048 8.18743   1
   6  -4   3 63.7618 34.7713  -2
   6  10   3 63.7618 34.7713   1
   7  -3   4 426.507 48.4116  -2
   7  10   3 426.507 48.4116   1
   8  -2   5 810.926 33.4039  -2
   8  10   3 810.926 33.4039   1
   9  -1   6 72.9464 29.9948  -2
   9  10   3 72.9464 29.9948   1
  10   0   7 145.323 38.1852  -2
  10  10   3 145.323 38.1852   1
  11   1   8 197.701 61.5259  -2
  11  10   3 197.701 61.5259   1
  13  10   3 -1.3275 20.5557   1
   3  15   7 148.226 44.2721  -2
  -5  11   3 148.226 44.2721   1
  -4  11   3 -0.5042 11.5132   1
  -3  11   3 8.79871 11.1120   1
  -2  11   3 8.91589 11.2282   1
  -1  11   3 0.01373 7.79424   1
   0  11   3 0.24622 7.45187   1
   1  11   3 16.3321 8.38407   1
   2  11   3 581.351 31.5257   1
   3  11   3 762.937 35.4476   1
   4  11   3 270.725 24.8618   1
   5  11   3 -4.0188 6.45841   1
   6  -5   3 519.015 45.8426  -2
   6  11   3 519.015 45.8426   1
   7  -4   4 115.502 42.9240  -2
   7  11   3 115.502 42.9240   1
   8  -3   5 256.094 34.2007  -2
   8  11   3 256.094 34.2007   1
   9  -2   6 43.9148 32.5249  -2
   9  11   3 43.9148 32.5249   1
  10  -1   7 247.544 60.4983  -2
  10  11   3 247.544 60.4983   1
  11   0   8 76.3147 64.2866  -2
  11  11   3 76.3147 64.2866   1
  12   1   9 25.6015 57.1808  -2
  12  11   3 25.6015 57.1808   1
  -3  12   3 137.134 36.7213   1
  -2  12   3 182.073 36.6675   1
  -1  12   3 113.745 31.3282   1
   0  12   3 10.4861 9.13899   1
   1  12   3 334.794 27.9005   1
  -3  10   1 243.472 52.7576  -2
   2  12   3 243.472 52.7576   1
  -4   9   0 28.2502 45.0378  -2
   3  12   3 28.2502 45.0378   1
   5  -8   1 152.928 45.0421  -2
   4  12   3 152.928 45.0421   1
   6  -7   2 159.273 44.7124  -2
   5  12   3 159.273 44.7124   1
   7  -6   3 142.646 43.9305  -2
   6  12   3 142.646 43.9305   1
   7  12   3 186.817 23.1047   1
   8  12   3 198.730 23.9645   1
   9  12   3 92.7022 18.9619   1
  -2  13   3 17.3697 13.9877   1
  -1  13   3 158.789 36.8235   1
   0  13   3 210.441 38.7078   1
   1  13   3 18.2084 11.8832   1
  -3  11   1 45.4270 51.2753  -2
   2  13   3 45.4270 51.2753   1
  -4  10   0 13.8124 47.4918  -2
   3  13   3 13.8124 47.4918   1
   5  -9   1 110.292 47.4697  -2
   4  13   3 110.292 47.4697   1
   6  -8   2 196.968 48.0617  -2
   5  13   3 196.968 48.0617   1
   7  -7   3 265.302 50.1023  -2
   6  13   3 265.302 50.1023   1
   8  -6   4 312.970 50.9392  -2
   7  13   3 312.970 50.9392   1
   8  13   3 0.12789 16.4632   1
   9  13   3 24.6195 15.1987   1
  11  13   3 -7.5743 20.9263   1
  -1  14   3 3.91867 20.1099   1
   0  14   3 -3.6763 13.0426   1
   1  14   3 0.70852 11.9548   1
  -3  12   1 120.092 37.2093  -2
   2  14   3 120.092 37.2093   1
  -4  11   0 44.8337 35.8581  -2
   3  14   3 44.8337 35.8581   1
   5 -10   1 33.3668 35.5155  -2
   4  14   3 33.3668 35.5155   1
   6  -9   2 110.582 50.4700  -2
   5  14   3 110.582 50.4700   1
   7  -8   3 107.735 48.7896  -2
   6  14   3 107.735 48.7896   1
   8  -7   4 499.567 58.8029  -2
   7  14   3 499.567 58.8029   1
   8  14   3 346.508 54.6868   1
   9  14   3 29.5065 15.5259   1
  10  14   3 -8.8194 20.8277   1
   2  15   3 44.0740 16.4919   1
  -4  12   0 297.342 42.7946  -2
   3  15   3 297.342 42.7946   1
   5 -11   1 92.3780 38.4234  -2
   4  15   3 92.3780 38.4234   1
   6 -10   2 72.3277 37.4625  -2
   5  15   3 72.3277 37.4625   1
   7  -9   3 122.701 38.5814  -2
   6  15   3 122.701 38.5814   1
   8  -8   4 195.403 52.8708  -2
   7  15   3 195.403 52.8708   1
   8  15   3 -20.753 16.5509   1
   7  -6  11 78.5116 36.5977  -2
  -7 -13   4 78.5116 36.5977   1
   6  -7  10 121.682 37.8322  -2
  -6 -13   4 121.682 37.8322   1
   5  -8   9 162.906 42.3493  -2
  -5 -13   4 162.906 42.3493   1
   4  -9   8 127.301 44.6303  -2
  -4 -13   4 127.301 44.6303   1
  -1 -13   4 38.4176 20.7926   1
   0 -13   4 23.8617 21.1584   1
   9  -3  13 205.958 39.3825  -2
  -9 -12   4 205.958 39.3825   1
   8  -4  12 101.564 29.0977  -2
  -8 -12   4 101.564 29.0977   1
   7  -5  11 50.4257 32.8915  -2
  -7 -12   4 50.4257 32.8915   1
   6  -6  10 38.9967 33.7052  -2
  -6 -12   4 38.9967 33.7052   1
   5  -7   9 44.9926 22.8203  -2
  -5 -12   4 44.9926 22.8203   1
   4  -8   8 205.816 29.8800  -2
  -4 -12   4 205.816 29.8800   1
   3  -9   7 314.659 49.5442  -2
  -3 -12   4 314.659 49.5442   1
   2 -10   6 184.686 47.7870  -2
  -2 -12   4 184.686 47.7870   1
   1 -12   4 219.751 51.6366  -2
   0 -12   4 219.751 51.6366   1
   2 -12   4 209.152 44.9939   1
  10  -1  14 6.93687 53.1270  -2
 -10 -11   4 6.93687 53.1270   1
   9  -2  13 -0.9054 44.1166  -2
  -9 -11   4 -0.9054 44.1166   1
   8  -3  12 -6.8738 31.9273  -2
  -8 -11   4 -6.8738 31.9273   1
   7  -4  11 14.2575 22.5532  -2
  -7 -11   4 14.2575 22.5532   1
   6  -5  10 89.0461 23.7039  -2
  -6 -11   4 89.0461 23.7039   1
   5  -6   9 261.937 20.9493  -2
  -5 -11   4 261.937 20.9493   1
   4  -7   8 204.773 24.0757  -2
  -4 -11   4 204.773 24.0757   1
   3  -8   7 185.106 24.0894  -2
  -3 -11   4 185.106 24.0894   1
   2  -9   6 301.451 27.1768  -2
  -2 -11   4 301.451 27.1768   1
   1 -10   5 191.390 49.5834  -2
  -1 -11   4 191.390 49.5834   1
   0 -11   4 5.79377 48.5123  -2
   0 -11   4 5.79377 48.5123   1
   1 -11   4 32.0779 18.9903   1
  -3 -14   1 122.091 58.3588  -2
   4 -11   4 122.091 58.3588   1
 -11 -10   4 122.520 23.3329   1
 -10 -10   4 130.856 36.1953   1
   9  -1  13 33.1849 34.7900  -2
  -9 -10   4 33.1849 34.7900   1
   8  -2  12 29.0671 26.8260  -2
  -8 -10   4 29.0671 26.8260   1
   7  -3  11 -21.862 45.7659  -2
  -7 -10   4 -21.862 45.7659   1
   6  -4  10 62.5592 14.0686  -2
  -6 -10   4 62.5592 14.0686   1
   5  -5   9 240.762 20.0911  -2
  -5 -10   4 240.762 20.0911   1
   4  -6   8 71.5432 16.0725  -2
  -4 -10   4 71.5432 16.0725   1
   3  -7   7 -10.476 14.3860  -2
  -3 -10   4 -10.476 14.3860   1
   2  -8   6 59.1579 15.1785  -2
  -2 -10   4 59.1579 15.1785   1
   1  -9   5 82.0539 21.8248  -2
  -1 -10   4 82.0539 21.8248   1
   0 -10   4 23.8813 46.4714  -2
   0 -10   4 23.8813 46.4714   1
  -1 -11   3 59.2382 51.5822  -2
   1 -10   4 59.2382 51.5822   1
   2 -10   4 136.243 38.2163   1
   3 -10   4 144.388 40.4998   1
   4 -10   4 24.6422 19.5038   1
 -12  -9   4 174.601 44.7115   1
   9   0  13 40.6674 53.5324  -2
  -9  -9   4 40.6674 53.5324   1
   8  -1  12 33.5842 26.2501  -2
  -8  -9   4 33.5842 26.2501   1
   7  -2  11 67.1980 23.1836  -2
  -7  -9   4 67.1980 23.1836   1
   6  -3  10 64.3524 18.5145  -2
  -6  -9   4 64.3524 18.5145   1
   5  -4   9 250.135 15.2671  -2
  -5  -9   4 250.135 15.2671   1
   4  -5   8 208.621 16.0515  -2
  -4  -9   4 208.621 16.0515   1
   3  -6   7 175.941 15.1045  -2
  -3  -9   4 175.941 15.1045   1
   2  -7   6 432.860 20.4709  -2
  -2  -9   4 432.860 20.4709   1
   1  -8   5 327.592 18.7954  -2
  -1  -9   4 327.592 18.7954   1
   0  -9   4 272.148 18.5986  -2
   0  -9   4 272.148 18.5986   1
  -1 -10   3 488.783 30.1763  -2
   1  -9   4 488.783 30.1763   1
  -2 -11   2 856.114 70.5561  -2
   2  -9   4 856.114 70.5561   1
   3  -9   4 59.6360 20.7546   1
   4  -9   4 3.24775 16.8947   1
   5  -9   4 32.5949 20.0859   1
   5  14   1 91.0574 51.4757  -2
   6  -9   4 91.0574 51.4757   1
   6  15   2 -107.44 151.946  -2
   7  -9   4 -107.44 151.946   1
 -12  -8   4 125.696 36.2582   1
  11   3  14 -78.059 142.645  -2
 -11  -8   4 -78.059 142.645   1
  10   2  13 -16.193 43.4626  -2
 -10  -8   4 -16.193 43.4626   1
   9   1  13 275.800 50.6170  -2
  -9  -8   4 275.800 50.6170   1
   8   0  12 147.958 27.3336  -2
  -8  -8   4 147.958 27.3336   1
   7  -1  11 14.6658 23.1483  -2
  -7  -8   4 14.6658 23.1483   1
   6  -2  10 29.4418 17.9192  -2
  -6  -8   4 29.4418 17.9192   1
   5  -3   9 64.8508 14.1356  -2
  -5  -8   4 64.8508 14.1356   1
   4  -4   8 182.024 12.8361  -2
  -4  -8   4 182.024 12.8361   1
   3  -5   7 392.556 16.5821  -2
  -3  -8   4 392.556 16.5821   1
   2  -6   6 148.485 14.4480  -2
  -2  -8   4 148.485 14.4480   1
   1  -7   5 551.244 18.0029  -2
  -1  -8   4 551.244 18.0029   1
   0  -8   4 1247.89 33.0768  -2
   0  -8   4 1247.89 33.0768   1
  -1  -9   3 220.027 23.6823  -2
   1  -8   4 220.027 23.6823   1
  -2 -10   2 3.79795 20.9148  -2
   2  -8   4 3.79795 20.9148   1
  -3 -11   1 11.6983 114.148  -2
   3  -8   4 11.6983 114.148   1
   4  -8   4 107.219 36.0128   1
   5  -8   4 35.2455 18.4053   1
   6  -8   4 12.0029 17.2417   1
   6  14   2 141.924 50.3451  -2
   7  -8   4 141.924 50.3451   1
  11   4  15 131.949 34.2859  -2
 -12  -7   4 131.949 34.2859   1
  11   4  14 -25.647 72.6049  -2
 -11  -7   4 -25.647 72.6049   1
  10   3  13 80.5194 68.4300  -2
 -10  -7   4 80.5194 68.4300   1
  -9  -7   4 33.2024 11.8292   1
   8   1  12 -40.753 30.2836  -2
  -8  -7   4 -40.753 30.2836   1
   7   0  11 77.0440 24.3926  -2
  -7  -7   4 77.0440 24.3926   1
   6  -1  10 887.588 28.3389  -2
  -6  -7   4 887.588 28.3389   1
   5  -2   9 1884.19 36.7365  -2
  -5  -7   4 1884.19 36.7365   1
   4  -3   8 1253.25 27.0236  -2
  -4  -7   4 1253.25 27.0236   1
   3  -4   7 458.444 15.0883  -2
  -3  -7   4 458.444 15.0883   1
   2  -5   6 162.506 13.2534  -2
  -2  -7   4 162.506 13.2534   1
   1  -6   5 265.326 14.6133  -2
  -1  -7   4 265.326 14.6133   1
   0  -7   4 -1.7229 14.5727  -2
   0  -7   4 -1.7229 14.5727   1
  -1  -8   3 -11.310 16.5931  -2
   1  -7   4 -11.310 16.5931   1
  -2  -9   2 244.475 22.4246  -2
   2  -7   4 244.475 22.4246   1
  -3 -10   1 423.735 27.3000  -2
   3  -7   4 423.735 27.3000   1
   4  -7   4 142.131 35.3558   1
   5  -7   4 26.1952 17.2893   1
   6  13   2 -95.401 125.428  -2
   6  -7   4 -95.401 125.428   1
   7  -7   4 64.5423 32.1193   1
   8  15   4 -19.368 142.635  -2
   9  -7   4 -19.368 142.635   1
 -12  -6   4 -0.3404 39.1301   1
  10   4  14 130.952 54.4607  -2
 -11  -6   4 130.952 54.4607   1
 -10  -6   4 257.604 30.8407   1
  -9  -6   4 -4.2960 12.3052   1
  -8  -6   4 372.466 23.1913   1
   7   1  11 86.8971 54.4289  -2
  -7  -6   4 86.8971 54.4289   1
   6   0  10 230.367 19.8720  -2
  -6  -6   4 230.367 19.8720   1
   5  -1   9 578.570 18.2790  -2
  -5  -6   4 578.570 18.2790   1
   4  -2   8 174.106 11.8241  -2
  -4  -6   4 174.106 11.8241   1
   3  -3   7 0.40651 8.78347  -2
  -3  -6   4 0.40651 8.78347   1
   2  -4   6 40.6483 8.55474  -2
  -2  -6   4 40.6483 8.55474   1
   1  -5   5 93.1414 11.0720  -2
  -1  -6   4 93.1414 11.0720   1
   0  -6   4 -3.3314 12.6694  -2
   0  -6   4 -3.3314 12.6694   1
  -1  -7   3 19.6866 14.9520  -2
   1  -6   4 19.6866 14.9520   1
  -2  -8   2 307.930 22.1294  -2
   2  -6   4 307.930 22.1294   1
  -3  -9   1 1092.81 38.3304  -2
   3  -6   4 1092.81 38.3304   1
   4  10   0 258.037 25.4419  -2
   4  -6   4 258.037 25.4419   1
   5  11   1 11.1882 32.8840  -2
   5  -6   4 11.1882 32.8840   1
   6  12   2 149.400 121.604  -2
   6  -6   4 149.400 121.604   1
   7  13   3 23.8664 129.987  -2
   8  -6   4 23.8664 129.987   1
   9  -6   4 9.22991 64.2430   1
  12   7  16 563.536 53.1537  -2
 -13  -5   4 563.536 53.1537   1
  11   6  15 273.102 49.6336  -2
 -12  -5   4 273.102 49.6336   1
  10   5  14 94.6813 51.1393  -2
 -11  -5   4 94.6813 51.1393   1
 -10  -5   4 30.6085 38.1909   1
  -9  -5   4 197.554 21.2632   1
  -8  -5   4 166.815 19.0003   1
  -7  -5   4 -11.106 6.32231   1
   6   1  10 -3.5304 28.6598  -2
  -6  -5   4 -3.5304 28.6598   1
   5   0   9 193.069 13.1577  -2
  -5  -5   4 193.069 13.1577   1
   4  -1   8 0.04764 8.91071  -2
  -4  -5   4 0.04764 8.91071   1
   3  -2   7 190.848 10.4163  -2
  -3  -5   4 190.848 10.4163   1
   2  -3   6 550.677 14.4815  -2
  -2  -5   4 550.677 14.4815   1
   1  -4   5 425.469 15.3148  -2
  -1  -5   4 425.469 15.3148   1
   0  -5   4 80.2308 12.8791  -2
   0  -5   4 80.2308 12.8791   1
  -1  -6   3 1582.48 41.5290  -2
   1  -5   4 1582.48 41.5290   1
  -2  -7   2 1146.43 34.5037  -2
   2  -5   4 1146.43 34.5037   1
  -3  -8   1 -0.4267 10.7827  -2
   3  -5   4 -0.4267 10.7827   1
   4   9   0 710.576 33.7750  -2
   4  -5   4 710.576 33.7750   1
   5  10   1 567.079 32.0882  -2
   5  -5   4 567.079 32.0882   1
   6  11   2 -73.780 117.688  -2
   6  -5   4 -73.780 117.688   1
   7  12   3 -29.317 121.424  -2
   7  -5   4 -29.317 121.424   1
   8  -5   4 -4.0525 57.9113   1
  12   8  16 168.051 47.3332  -2
 -13  -4   4 168.051 47.3332   1
  11   7  15 120.910 45.2597  -2
 -12  -4   4 120.910 45.2597   1
 -11  -4   4 29.1910 38.8599   1
   9   5  13 201.037 45.7143  -2
 -10  -4   4 201.037 45.7143   1
  -9  -4   4 36.4923 9.71366   1
  -8  -4   4 -2.2985 7.35830   1
  -7  -4   4 146.467 16.0787   1
   6   2  10 78.1840 42.6330  -2
  -6  -4   4 78.1840 42.6330   1
   5   1   9 23.8608 13.7418  -2
  -5  -4   4 23.8608 13.7418   1
   4   0   8 386.290 12.9627  -2
  -4  -4   4 386.290 12.9627   1
   3  -1   7 1405.91 25.7872  -2
  -3  -4   4 1405.91 25.7872   1
   2  -2   6 687.670 15.6698  -2
  -2  -4   4 687.670 15.6698   1
   1  -3   5 2716.83 52.2979  -2
  -1  -4   4 2716.83 52.2979   1
   0  -4   4 5494.01 123.000  -2
   0  -4   4 5494.01 123.000   1
  -1  -5   3 1438.23 39.7138  -2
   1  -4   4 1438.23 39.7138   1
  -2  -6   2 688.207 24.1650  -2
   2  -4   4 688.207 24.1650   1
  -3  -7   1 139.975 14.0001  -2
   3  -4   4 139.975 14.0001   1
   4   8   0 160.135 13.5154  -2
   4  -4   4 160.135 13.5154   1
   5   9   1 121.065 17.4593  -2
   5  -4   4 121.065 17.4593   1
   6  10   2 312.151 112.326  -2
   6  -4   4 312.151 112.326   1
   7  11   3 346.215 127.591  -2
   7  -4   4 346.215 127.591   1
   8  12   4 119.964 119.537  -2
   8  -4   4 119.964 119.537   1
   9  -4   4 -19.061 53.9619   1
  12   9  16 -0.7418 41.0293  -2
 -13  -3   4 -0.7418 41.0293   1
  11   8  15 226.729 43.9174  -2
 -12  -3   4 226.729 43.9174   1
  10   7  14 43.2610 35.3736  -2
 -11  -3   4 43.2610 35.3736   1
   9   6  13 145.816 43.0096  -2
 -10  -3   4 145.816 43.0096   1
  -9  -3   4 272.479 22.3002   1
  -8  -3   4 182.416 18.0334   1
  -7  -3   4 50.2036 7.70372   1
  -6  -3   4 510.081 21.3237   1
   5   2   9 1602.45 48.7355  -2
  -5  -3   4 1602.45 48.7355   1
   4   1   8 1215.61 24.0968  -2
  -4  -3   4 1215.61 24.0968   1
   3   0   7 1033.04 20.6848  -2
  -3  -3   4 1033.04 20.6848   1
   2  -1   6 765.236 16.0220  -2
  -2  -3   4 765.236 16.0220   1
   1  -2   5 395.468 15.1127  -2
  -1  -3   4 395.468 15.1127   1
   0  -3   4 392.458 16.6369  -2
   0  -3   4 392.458 16.6369   1
  -1  -4   3 70.3408 9.57429  -2
   1  -3   4 70.3408 9.57429   1
  -2  -5   2 337.960 16.9050  -2
   2  -3   4 337.960 16.9050   1
  -3  -6   1 47.2152 19.8898  -2
   3  -3   4 47.2152 19.8898   1
   4   7   0 1262.80 36.5516  -2
   4  -3   4 1262.80 36.5516   1
   5   8   1 724.874 19.4999  -2
   5  -3   4 724.874 19.4999   1
   6   9   2 69.8139 20.8670  -2
   6  -3   4 69.8139 20.8670   1
   7  10   3 165.820 108.449  -2
   7  -3   4 165.820 108.449   1
   8  11   4 368.491 123.019  -2
   8  -3   4 368.491 123.019   1
   9  -3   4 60.2618 23.7105   1
  10  -3   4 -8.3849 52.4332   1
  11  -3   4 11.9404 61.5912   1
  11   9  15 157.632 43.5968  -2
 -12  -2   4 157.632 43.5968   1
  10   8  14 -7.5223 76.4236  -2
 -11  -2   4 -7.5223 76.4236   1
   9   7  13 38.5657 26.2786  -2
 -10  -2   4 38.5657 26.2786   1
   8   6  12 175.223 45.3707  -2
  -9  -2   4 175.223 45.3707   1
  -8  -2   4 705.685 24.1257   1
  -7  -2   4 571.289 24.4915   1
  -6  -2   4 373.348 15.6731   1
  -5  -2   4 8.73815 4.00382   1
   4   2   8 374.948 15.4753  -2
  -4  -2   4 374.948 15.4753   1
   3   1   7 268.178 10.2393  -2
  -3  -2   4 268.178 10.2393   1
   2   0   6 726.686 16.2319  -2
  -2  -2   4 726.686 16.2319   1
   1  -1   5 1124.53 27.2965  -2
  -1  -2   4 1124.53 27.2965   1
   0  -2   4 4509.61 100.442  -2
   0  -2   4 4509.61 100.442   1
  -1  -3   3 4641.68 94.4444  -2
   1  -2   4 4641.68 94.4444   1
  -2  -4   2 363.214 16.0168  -2
   2  -2   4 363.214 16.0168   1
  -3  -5   1 831.175 26.3696  -2
   3  -2   4 831.175 26.3696   1
   4   6   0 1634.00 44.3825  -2
   4  -2   4 1634.00 44.3825   1
   6   8   2 507.373 20.9278  -2
   6  -2   4 507.373 20.9278   1
   7   9   3 124.706 21.3906  -2
   7  -2   4 124.706 21.3906   1
   8  -2   4 13.7017 5.21349   1
   9  -2   4 37.0307 7.02877   1
  10  -2   4 258.520 20.1343   1
  11  -2   4 -1.3514 15.9621   1
  11  13   7 -16.693 128.663  -2
  12  -2   4 -16.693 128.663   1
  11  10  15 304.873 49.0067  -2
 -12  -1   4 304.873 49.0067   1
  10   9  14 87.0861 27.6687  -2
 -11  -1   4 87.0861 27.6687   1
   9   8  13 -10.663 21.0489  -2
 -10  -1   4 -10.663 21.0489   1
   8   7  12 181.384 21.8772  -2
  -9  -1   4 181.384 21.8772   1
  -8  -1   4 29.0410 6.23266   1
  -7  -1   4 36.5082 6.97023   1
  -6  -1   4 1038.95 26.4596   1
  -5  -1   4 425.380 15.2415   1
  -4  -1   4 327.607 10.8994   1
   3   2   7 154.779 10.4364  -2
  -3  -1   4 154.779 10.4364   1
   2   1   6 1625.71 31.1162  -2
  -2  -1   4 1625.71 31.1162   1
   1   0   5 1780.38 29.4734  -2
  -1  -1   4 1780.38 29.4734   1
   0  -1   4 984.302 30.5322  -2
   0  -1   4 984.302 30.5322   1
  -1  -2   3 2761.18 63.7777  -2
   1  -1   4 2761.18 63.7777   1
  -2  -3   2 297.094 14.5471  -2
   2  -1   4 297.094 14.5471   1
  -3  -4   1 562.682 19.8269  -2
   3  -1   4 562.682 19.8269   1
   4   5   0 2153.80 50.0297  -2
   4  -1   4 2153.80 50.0297   1
   5   6   1 2044.00 52.9095  -2
   5  -1   4 2044.00 52.9095   1
   6   7   2 475.107 16.0080  -2
   6  -1   4 475.107 16.0080   1
   7   8   3 212.200 17.0375  -2
   7  -1   4 212.200 17.0375   1
   8   9   4 145.474 99.7287  -2
   8  -1   4 145.474 99.7287   1
   9  10   5 169.545 113.313  -2
   9  -1   4 169.545 113.313   1
  10  -1   4 3.58714 7.96211   1
  11  -1   4 34.1329 15.0303   1
  12  -1   4 42.6253 18.3814   1
  11  11  15 120.379 42.2779  -2
 -12   0   4 120.379 42.2779   1
  10  10  14 29.2121 25.2475  -2
 -11   0   4 29.2121 25.2475   1
   9   9  13 61.5633 25.8156  -2
 -10   0   4 61.5633 25.8156   1
   8   8  12 12.4404 20.3604  -2
  -9   0   4 12.4404 20.3604   1
   7   7  11 78.8478 25.5018  -2
  -8   0   4 78.8478 25.5018   1
  -7   0   4 170.931 13.1243   1
  -6   0   4 302.942 14.2115   1
  -5   0   4 543.534 16.9248   1
  -4   0   4 1059.34 24.0059   1
  -3   0   4 393.471 10.3276   1
   2   2   6 1165.64 27.9379  -2
  -2   0   4 1165.64 27.9379   1
   1   1   5 2589.53 60.5138  -2
  -1   0   4 2589.53 60.5138   1
   0   0   4 2937.17 67.9227  -2
   0   0   4 2937.17 67.9227   1
  -1  -1   3 1567.07 31.4367  -2
   1   0   4 1567.07 31.4367   1
  -2  -2   2 1702.89 34.3344  -2
   2   0   4 1702.89 34.3344   1
  -3  -3   1 444.624 17.2541  -2
   3   0   4 444.624 17.2541   1
   4   4   0 573.609 16.0236  -2
   4   0   4 573.609 16.0236   1
   5   5   1 34.9341 9.59583  -2
   5   0   4 34.9341 9.59583   1
   6   6   2 1010.17 25.3538  -2
   6   0   4 1010.17 25.3538   1
   7   7   3 542.653 25.4877  -2
   7   0   4 542.653 25.4877   1
   8   8   4 -10.396 86.9640  -2
   8   0   4 -10.396 86.9640   1
   9   9   5 92.6444 111.204  -2
   9   0   4 92.6444 111.204   1
  10   0   4 524.478 28.5136   1
  11   0   4 34.3249 11.6634   1
  12   0   4 110.414 27.7953   1
  13   0   4 88.9529 28.8855   1
  11  12  15 150.186 44.9447  -2
 -12   1   4 150.186 44.9447   1
  10  11  14 78.4247 27.9073  -2
 -11   1   4 78.4247 27.9073   1
   9  10  13 102.978 28.1042  -2
 -10   1   4 102.978 28.1042   1
   8   9  12 610.784 29.3864  -2
  -9   1   4 610.784 29.3864   1
   7   8  11 743.292 55.2268  -2
  -8   1   4 743.292 55.2268   1
  -7   1   4 9.97345 5.08624   1
  -6   1   4 6.12518 4.17135   1
  -5   1   4 13.3006 3.70469   1
  -4   1   4 246.982 10.9055   1
  -3   1   4 913.258 17.6190   1
  -2   1   4 899.878 16.0044   1
   1   2   5 131.124 15.8859  -2
  -1   1   4 131.124 15.8859   1
   0   1   4 372.618 20.8344  -2
   0   1   4 372.618 20.8344   1
  -1   0   3 1077.30 40.8661  -2
   1   1   4 1077.30 40.8661   1
  -2  -1   2 253.597 10.0665  -2
   2   1   4 253.597 10.0665   1
  -3  -2   1 1171.78 25.2490  -2
   3   1   4 1171.78 25.2490   1
   4   3   0 3466.93 79.7377  -2
   4   1   4 3466.93 79.7377   1
   5   4   1 3180.89 61.5596  -2
   5   1   4 3180.89 61.5596   1
   6   5   2 1052.53 26.5456  -2
   6   1   4 1052.53 26.5456   1
   7   6   3 226.318 14.0303  -2
   7   1   4 226.318 14.0303   1
   8   7   4 148.262 30.3370  -2
   8   1   4 148.262 30.3370   1
   9   8   5 73.0076 23.9402  -2
   9   1   4 73.0076 23.9402   1
  10   9   6 121.691 38.6691  -2
  10   1   4 121.691 38.6691   1
  11   1   4 336.790 25.1084   1
  12   1   4 45.2412 53.4019   1
  13   1   4 15.2160 15.2462   1
  10  12  14 226.913 33.5386  -2
 -11   2   4 226.913 33.5386   1
   9  11  13 121.346 28.4137  -2
 -10   2   4 121.346 28.4137   1
   8  10  12 40.2843 25.5427  -2
  -9   2   4 40.2843 25.5427   1
   7   9  11 242.348 21.6324  -2
  -8   2   4 242.348 21.6324   1
   6   8  10 553.048 100.938  -2
  -7   2   4 553.048 100.938   1
  -6   2   4 70.2284 13.2468   1
  -5   2   4 -2.5231 3.89110   1
  -4   2   4 -2.3131 3.48413   1
  -3   2   4 86.1546 10.0864   1
  -2   2   4 841.885 23.4100   1
  -1   2   4 1505.07 34.2691   1
   0   2   4 2996.46 98.6868  -2
   0   2   4 2996.46 98.6868   1
  -1   1   3 6701.65 209.323  -2
   1   2   4 6701.65 209.323   1
  -2   0   2 1140.48 29.3821  -2
   2   2   4 1140.48 29.3821   1
  -3  -1   1 1364.27 29.0476  -2
   3   2   4 1364.27 29.0476   1
   4   2   0 437.181 11.8088  -2
   4   2   4 437.181 11.8088   1
   5   3   1 58.8930 7.52007  -2
   5   2   4 58.8930 7.52007   1
   6   4   2 439.094 18.2835  -2
   6   2   4 439.094 18.2835   1
   7   5   3 42.8780 17.1343  -2
   7   2   4 42.8780 17.1343   1
   8   6   4 143.302 21.9663  -2
   8   2   4 143.302 21.9663   1
   9   7   5 443.250 30.9457  -2
   9   2   4 443.250 30.9457   1
  10   8   6 19.5173 26.9998  -2
  10   2   4 19.5173 26.9998   1
  11   2   4 19.9451 16.4031   1
  12   2   4 88.0182 25.6656   1
  13   2   4 109.664 27.5538   1
  14   2   4 64.3191 17.8034   1
  10  13  14 3.81995 40.5212  -2
 -11   3   4 3.81995 40.5212   1
   9  12  13 19.2955 28.3159  -2
 -10   3   4 19.2955 28.3159   1
   8  11  12 57.0478 27.3318  -2
  -9   3   4 57.0478 27.3318   1
   7  10  11 219.436 29.3917  -2
  -8   3   4 219.436 29.3917   1
   6   9  10 -7.3527 32.6457  -2
  -7   3   4 -7.3527 32.6457   1
  -6   3   4 0.59437 4.60325   1
  -5   3   4 70.2234 10.1735   1
  -4   3   4 -1.3028 4.80445   1
  -3   3   4 509.570 19.8205   1
  -2   3   4 2665.95 59.7753   1
  -1   3   4 1069.50 65.8842   1
   0   3   4 118.140 10.1702   1
  -1   2   3 1605.84 60.0409  -2
   1   3   4 1605.84 60.0409   1
  -2   1   2 753.652 23.9273  -2
   2   3   4 753.652 23.9273   1
  -3   0   1 919.733 22.5387  -2
   3   3   4 919.733 22.5387   1
   4   1   0 278.889 13.4356  -2
   4   3   4 278.889 13.4356   1
   5   2   1 165.430 11.9225  -2
   5   3   4 165.430 11.9225   1
   6   3   2 243.918 10.3155  -2
   6   3   4 243.918 10.3155   1
   7   4   3 40.9516 14.7207  -2
   7   3   4 40.9516 14.7207   1
   8   5   4 80.2203 17.7865  -2
   8   3   4 80.2203 17.7865   1
   9   6   5 2.91178 22.6549  -2
   9   3   4 2.91178 22.6549   1
  10   7   6 221.018 30.4530  -2
  10   3   4 221.018 30.4530   1
  11   8   7 199.380 43.5951  -2
  11   3   4 199.380 43.5951   1
  12   3   4 54.8783 17.2017   1
  13   3   4 29.1781 16.0523   1
  14   3   4 94.7521 28.7646   1
  10  14  14 163.932 86.9770  -2
 -11   4   4 163.932 86.9770   1
   8  12  12 152.833 30.9122  -2
  -9   4   4 152.833 30.9122   1
   7  11  11 315.070 32.5754  -2
  -8   4   4 315.070 32.5754   1
   6  10  10 1018.57 44.8104  -2
  -7   4   4 1018.57 44.8104   1
   5   9   9 262.828 98.5568  -2
  -6   4   4 262.828 98.5568   1
  -5   4   4 193.448 14.3163   1
  -4   4   4 543.781 23.1348   1
  -3   4   4 788.699 28.6205   1
  -1   4   4 111.787 12.0710   1
   0   4   4 -1.2010 3.43329   1
   1   4   4 341.252 15.5796   1
   2   4   4 39.0951 5.89025   1
  -3   1   1 372.883 20.0457  -2
   3   4   4 372.883 20.0457   1
   4   0   0 503.642 18.1804  -2
   4   4   4 503.642 18.1804   1
   5   1   1 1248.65 30.6698  -2
   5   4   4 1248.65 30.6698   1
   6   2   2 341.455 20.7567  -2
   6   4   4 341.455 20.7567   1
   7   3   3 563.675 32.0532  -2
   7   4   4 563.675 32.0532   1
   8   4   4 208.500 20.0356  -2
   8   4   4 208.500 20.0356   1
   9   5   5 1010.08 40.2437  -2
   9   4   4 1010.08 40.2437   1
  10   6   6 1058.76 44.2683  -2
  10   4   4 1058.76 44.2683   1
  12   8   8 218.821 90.9774  -2
  12   4   4 218.821 90.9774   1
  13   4   4 135.349 62.3195   1
  14   9   9 204.146 33.4998  -2
  14   4   4 204.146 33.4998   1
   7  12  11 796.394 43.6858  -2
  -8   5   4 796.394 43.6858   1
   6  11  10 295.988 32.7058  -2
  -7   5   4 295.988 32.7058   1
   5  10   9 -9.2577 103.316  -2
  -6   5   4 -9.2577 103.316   1
   4   9   8 -37.928 97.2915  -2
  -5   5   4 -37.928 97.2915   1
  -4   5   4 249.499 18.5966   1
  -3   5   4 133.941 14.4015   1
  -2   5   4 129.119 14.4884   1
  -1   5   4 21.3454 5.29238   1
   0   5   4 212.496 14.5830   1
   1   5   4 228.582 14.4371   1
   2   5   4 16.9667 4.58381   1
   3   5   4 204.589 11.9493   1
  -4   1   0 1806.39 53.6108  -2
   4   5   4 1806.39 53.6108   1
   5   0   1 2390.44 46.7384  -2
   5   5   4 2390.44 46.7384   1
   6   1   2 819.367 29.9925  -2
   6   5   4 819.367 29.9925   1
   7   2   3 68.9512 16.8967  -2
   7   5   4 68.9512 16.8967   1
   8   3   4 159.756 19.7018  -2
   8   5   4 159.756 19.7018   1
   9   4   5 106.385 19.2102  -2
   9   5   4 106.385 19.2102   1
  10   5   6 116.578 26.5242  -2
  10   5   4 116.578 26.5242   1
  12   7   7 23.3386 37.0113  -2
  12   5   4 23.3386 37.0113   1
  13   5   4 5.46225 16.3815   1
  14   9   9 46.1314 44.1886  -2
  14   5   4 46.1314 44.1886   1
   6  12  10 160.510 30.4000  -2
  -7   6   4 160.510 30.4000   1
   5  11   9 -104.98 106.154  -2
  -6   6   4 -104.98 106.154   1
   4  10   8 31.2823 104.921  -2
  -5   6   4 31.2823 104.921   1
   3   9   7 -98.047 97.4334  -2
  -4   6   4 -98.047 97.4334   1
  -3   6   4 2.25931 5.33302   1
  -2   6   4 61.8770 10.6643   1
  -1   6   4 428.201 21.5517   1
   0   6   4 206.324 15.6079   1
   1   6   4 66.2691 16.4125   1
   2   6   4 2584.73 66.4944   1
   3   6   4 695.754 20.7465   1
  -4   2   0 719.381 43.4978  -2
   4   6   4 719.381 43.4978   1
   5  -1   1 -8.3677 20.0357  -2
   5   6   4 -8.3677 20.0357   1
   6   0   2 1027.22 30.9089  -2
   6   6   4 1027.22 30.9089   1
   7   1   3 117.138 20.8304  -2
   7   6   4 117.138 20.8304   1
   8   2   4 118.857 20.2687  -2
   8   6   4 118.857 20.2687   1
   9   3   5 484.249 27.8879  -2
   9   6   4 484.249 27.8879   1
  14   8   9 122.993 48.0823  -2
  14   6   4 122.993 48.0823   1
   5  12   9 119.556 40.9971  -2
  -6   7   4 119.556 40.9971   1
   4  11   8 -14.497 36.8356  -2
  -5   7   4 -14.497 36.8356   1
   3  10   7 -13.839 105.547  -2
  -4   7   4 -13.839 105.547   1
   2   9   6 985.596 125.322  -2
  -3   7   4 985.596 125.322   1
  -2   7   4 1496.15 47.4417   1
  -1   7   4 603.218 27.3414   1
   0   7   4 10.7808 5.26528   1
   1   7   4 904.655 31.9682   1
   2   7   4 1607.31 47.2166   1
   3   7   4 7.20085 5.56104   1
  -4   3   0 213.986 27.6885  -2
   4   7   4 213.986 27.6885   1
   5  -2   1 967.931 38.1968  -2
   5   7   4 967.931 38.1968   1
   6  -1   2 573.209 32.3420  -2
   6   7   4 573.209 32.3420   1
   7   0   3 344.042 19.3288  -2
   7   7   4 344.042 19.3288   1
   8   1   4 148.643 28.1704  -2
   8   7   4 148.643 28.1704   1
   9   2   5 95.0295 22.4906  -2
   9   7   4 95.0295 22.4906   1
  10   3   6 225.262 32.1538  -2
  10   7   4 225.262 32.1538   1
  13   6   8 105.673 46.2567  -2
  13   7   4 105.673 46.2567   1
   4  12   8 120.756 45.3359  -2
  -5   8   4 120.756 45.3359   1
  -4   8   4 355.437 35.1399   1
   2  10   6 252.902 108.896  -2
  -3   8   4 252.902 108.896   1
  -2   8   4 1.17783 6.29948   1
  -1   8   4 41.3561 11.8037   1
   0   8   4 -6.6958 5.44937   1
   1   8   4 4.16608 5.60596   1
   2   8   4 194.147 18.0219   1
   3   8   4 24.6255 6.61240   1
   4   8   4 45.3858 7.08534   1
   5   8   4 26.0106 6.23102   1
   6   8   4 393.859 19.3906   1
   7  -1   3 717.629 38.8574  -2
   7   8   4 717.629 38.8574   1
   8   0   4 186.552 26.8387  -2
   8   8   4 186.552 26.8387   1
   9   1   5 1228.21 46.0827  -2
   9   8   4 1228.21 46.0827   1
  10   2   6 282.694 31.1857  -2
  10   8   4 282.694 31.1857   1
  11   3   7 95.8170 47.2406  -2
  11   8   4 95.8170 47.2406   1
  14   6   9 177.380 56.3587  -2
  14   8   4 177.380 56.3587   1
   4  13   8 255.458 51.7594  -2
  -5   9   4 255.458 51.7594   1
   3  12   7 78.8067 44.3499  -2
  -4   9   4 78.8067 44.3499   1
   2  11   6 -42.461 40.7296  -2
  -3   9   4 -42.461 40.7296   1
  -2   9   4 92.8977 19.0559   1
  -1   9   4 50.3396 9.06743   1
   0   9   4 -3.1950 6.70012   1
   1   9   4 221.614 19.5292   1
   2   9   4 324.994 21.9964   1
   3   9   4 -1.9127 5.87326   1
   4   9   4 247.967 15.9209   1
   5   9   4 430.104 17.6961   1
   6   9   4 11.9955 6.49931   1
   7  -2   3 355.456 29.7341  -2
   7   9   4 355.456 29.7341   1
   8  -1   4 918.081 47.9018  -2
   8   9   4 918.081 47.9018   1
   9   0   5 353.032 34.3192  -2
   9   9   4 353.032 34.3192   1
  10   1   6 41.2101 30.8462  -2
  10   9   4 41.2101 30.8462   1
  11   2   7 96.5062 62.0556  -2
  11   9   4 96.5062 62.0556   1
  14   5   9 247.767 60.6986  -2
  14   9   4 247.767 60.6986   1
   4  15   9 -0.5969 40.4441  -2
  -6  10   4 -0.5969 40.4441   1
   4  14   8 181.599 53.3604  -2
  -5  10   4 181.599 53.3604   1
   3  13   7 295.427 52.6507  -2
  -4  10   4 295.427 52.6507   1
   2  12   6 345.639 53.0666  -2
  -3  10   4 345.639 53.0666   1
   1  11   5 192.223 48.0790  -2
  -2  10   4 192.223 48.0790   1
  -1  10   4 113.921 20.5968   1
   0  10   4 161.994 20.3001   1
   1  10   4 108.582 18.4212   1
   2  10   4 476.030 27.2525   1
   3  10   4 901.389 36.9851   1
   4  10   4 227.151 22.3501   1
   5  10   4 -6.5618 6.05218   1
   6  10   4 44.0157 8.24942   1
   7  10   4 15.7089 18.9870   1
   8  10   4 117.577 16.2003   1
   9  -1   5 289.168 46.6651  -2
   9  10   4 289.168 46.6651   1
  10   0   6 287.746 36.2503  -2
  10  10   4 287.746 36.2503   1
  11   1   7 123.319 60.2296  -2
  11  10   4 123.319 60.2296   1
  12   2   8 35.9072 65.2597  -2
  12  10   4 35.9072 65.2597   1
   3  15   8 137.641 44.1852  -2
  -5  11   4 137.641 44.1852   1
   2  14   7 -29.175 36.7028  -2
  -4  11   4 -29.175 36.7028   1
   3  14   7 139.939 51.9845  -2
  -4  11   4 139.939 51.9845   1
  -3  11   4 42.1127 13.3629   1
  -2  11   4 185.865 33.9432   1
  -1  11   4 13.9211 11.2579   1
   0  11   4 80.8216 15.8602   1
   1  11   4 24.7676 9.31395   1
   2  11   4 -1.8991 7.48633   1
   3  11   4 13.8886 8.58272   1
   4  11   4 -3.6269 7.87688   1
   5  11   4 4.15736 6.97777   1
   6  11   4 -4.7513 7.13369   1
   7  11   4 24.8211 8.84138   1
   8  11   4 545.783 25.4390   1
   9  11   4 -11.440 11.1577   1
  10  -1   6 161.433 52.2171  -2
  10  11   4 161.433 52.2171   1
   2  15   7 205.467 48.4566  -2
  -4  12   4 205.467 48.4566   1
   1  14   6 7.17934 38.8086  -2
  -3  12   4 7.17934 38.8086   1
  -2  12   4 28.9054 13.5563   1
   0  12   4 69.9562 50.6048  -2
  -1  12   4 69.9562 50.6048   1
   0  12   4 27.9241 10.3013   1
   1  12   4 55.0935 11.3094   1
   2  12   4 167.384 24.0619   1
   3  12   4 534.629 32.4729   1
   4  12   4 278.063 26.9617   1
   5  12   4 121.684 31.2900   1
   6  12   4 258.039 20.6040   1
   8  -5   3 278.425 48.4443  -2
   7  12   4 278.425 48.4443   1
   8  12   4 2.25726 10.7065   1
   9  12   4 -3.0798 12.9166   1
  10  12   4 -10.358 21.4584   1
   1  15   6 1.75821 44.7837  -2
  -3  13   4 1.75821 44.7837   1
   0  14   5 34.6165 42.1893  -2
  -2  13   4 34.6165 42.1893   1
  -1  13   4 29.1689 13.6807   1
   0  13   4 14.4800 13.1396   1
  -2  12   3 294.310 62.6869  -2
   1  13   4 294.310 62.6869   1
  -3  11   2 181.161 36.8924  -2
   2  13   4 181.161 36.8924   1
  -4  10   1 120.093 52.3738  -2
   3  13   4 120.093 52.3738   1
  -5   9   0 353.429 38.5127  -2
   4  13   4 353.429 38.5127   1
   6  -8   1 289.446 50.8909  -2
   5  13   4 289.446 50.8909   1
   6  13   4 -13.120 12.1551   1
   8  -6   3 312.252 53.9343  -2
   7  13   4 312.252 53.9343   1
   8  13   4 111.429 32.8785   1
   9  13   4 16.0984 14.5814   1
  12  13   4 -20.446 21.3723   1
   1  14   4 0.04733 11.9707   1
  -3  12   2 124.376 36.8597  -2
   2  14   4 124.376 36.8597   1
  -4  11   1 101.528 36.6430  -2
   3  14   4 101.528 36.6430   1
  -5  10   0 15.7068 35.0040  -2
   4  14   4 15.7068 35.0040   1
   6  -9   1 67.6822 51.0520  -2
   5  14   4 67.6822 51.0520   1
   7  -8   2 -7.6624 51.0510  -2
   6  14   4 -7.6624 51.0510   1
   8  -7   3 58.2518 38.6297  -2
   7  14   4 58.2518 38.6297   1
   9  14   4 -22.590 22.7337   1
  10  14   4 -0.8962 21.6204   1
  11  14   4 -12.447 21.7499   1
   2  15   4 13.5315 11.0462   1
  -4  12   1 53.9630 37.2381  -2
   3  15   4 53.9630 37.2381   1
  -5  11   0 26.2655 36.5154  -2
   4  15   4 26.2655 36.5154   1
   6 -10   1 15.5406 35.7729  -2
   5  15   4 15.5406 35.7729   1
   7  -9   2 87.0386 38.7021  -2
   6  15   4 87.0386 38.7021   1
   8  -8   3 414.975 45.1478  -2
   7  15   4 414.975 45.1478   1
   9  15   4 -23.221 18.9518   1
   6  -7  11 129.684 37.3310  -2
  -6 -13   5 129.684 37.3310   1
   5  -8  10 94.4689 27.1034  -2
  -5 -13   5 94.4689 27.1034   1
   4  -9   9 146.380 44.3652  -2
  -4 -13   5 146.380 44.3652   1
   3 -10   8 313.957 55.3249  -2
  -3 -13   5 313.957 55.3249   1
   2 -11   7 222.635 55.8345  -2
  -2 -13   5 222.635 55.8345   1
   8  -4  13 24.2510 32.9355  -2
  -8 -12   5 24.2510 32.9355   1
   7  -5  12 68.8774 29.6324  -2
  -7 -12   5 68.8774 29.6324   1
   6  -6  11 98.2075 25.6999  -2
  -6 -12   5 98.2075 25.6999   1
   5  -7  10 152.768 20.8836  -2
  -5 -12   5 152.768 20.8836   1
   4  -8   9 200.693 25.7206  -2
  -4 -12   5 200.693 25.7206   1
   3  -9   8 173.068 45.3264  -2
  -3 -12   5 173.068 45.3264   1
   2 -10   7 145.937 130.289  -2
  -2 -12   5 145.937 130.289   1
   1 -11   6 25.2502 49.9229  -2
  -1 -12   5 25.2502 49.9229   1
   0 -13   4 171.883 57.1778  -2
   1 -12   5 171.883 57.1778   1
   9  -2  14 269.284 54.4804  -2
  -9 -11   5 269.284 54.4804   1
   8  -3  13 181.745 45.4427  -2
  -8 -11   5 181.745 45.4427   1
   7  -4  12 40.7131 28.7546  -2
  -7 -11   5 40.7131 28.7546   1
   6  -5  11 4.03199 15.8689  -2
  -6 -11   5 4.03199 15.8689   1
   5  -6  10 40.7231 17.9148  -2
  -5 -11   5 40.7231 17.9148   1
   4  -7   9 79.8179 17.4613  -2
  -4 -11   5 79.8179 17.4613   1
   3  -8   8 45.5139 15.8784  -2
  -3 -11   5 45.5139 15.8784   1
   2  -9   7 136.045 23.0447  -2
  -2 -11   5 136.045 23.0447   1
   1 -10   6 11.6599 45.3712  -2
  -1 -11   5 11.6599 45.3712   1
   0 -11   5 109.784 52.1301  -2
   0 -11   5 109.784 52.1301   1
  -1 -12   4 20.9510 54.7344  -2
   1 -11   5 20.9510 54.7344   1
   2 -11   5 152.908 42.8078   1
  -2 -14   2 543.496 67.4584  -2
   3 -11   5 543.496 67.4584   1
  10   0  14 42.7511 55.8625  -2
 -10 -10   5 42.7511 55.8625   1
  10   0  15 -9.7761 65.6515  -2
 -10 -10   5 -9.7761 65.6515   1
   9  -1  14 -14.835 48.0078  -2
  -9 -10   5 -14.835 48.0078   1
   8  -2  13 2.94721 32.1189  -2
  -8 -10   5 2.94721 32.1189   1
   7  -3  12 -7.5015 27.5777  -2
  -7 -10   5 -7.5015 27.5777   1
   6  -4  11 8.94825 20.4428  -2
  -6 -10   5 8.94825 20.4428   1
   5  -5  10 48.2939 15.1520  -2
  -5 -10   5 48.2939 15.1520   1
   4  -6   9 53.8558 16.0082  -2
  -4 -10   5 53.8558 16.0082   1
   3  -7   8 56.5018 16.0500  -2
  -3 -10   5 56.5018 16.0500   1
   2  -8   7 331.407 20.5448  -2
  -2 -10   5 331.407 20.5448   1
   1  -9   6 484.594 23.2323  -2
  -1 -10   5 484.594 23.2323   1
   0 -10   5 103.678 47.4706  -2
   0 -10   5 103.678 47.4706   1
  -1 -11   4 345.922 59.0813  -2
   1 -10   5 345.922 59.0813   1
  -2 -12   3 72.0924 56.8921  -2
   2 -10   5 72.0924 56.8921   1
   3 -10   5 -0.6757 19.2623   1
   4 -10   5 15.6299 19.6834   1
  -4 -14   1 94.0298 57.4872  -2
   5 -10   5 94.0298 57.4872   1
  11   2  15 19.5476 78.5515  -2
 -11  -9   5 19.5476 78.5515   1
  10   1  14 210.023 54.7838  -2
 -10  -9   5 210.023 54.7838   1
   9   0  14 23.4246 54.5674  -2
  -9  -9   5 23.4246 54.5674   1
   8  -1  13 35.7102 27.8287  -2
  -8  -9   5 35.7102 27.8287   1
   7  -2  12 14.6909 24.3949  -2
  -7  -9   5 14.6909 24.3949   1
   6  -3  11 61.3657 19.2219  -2
  -6  -9   5 61.3657 19.2219   1
   5  -4  10 165.452 16.0475  -2
  -5  -9   5 165.452 16.0475   1
   4  -5   9 163.210 15.5894  -2
  -4  -9   5 163.210 15.5894   1
   3  -6   8 275.451 18.4109  -2
  -3  -9   5 275.451 18.4109   1
   2  -7   7 160.519 16.3755  -2
  -2  -9   5 160.519 16.3755   1
   1  -8   6 547.367 22.9324  -2
  -1  -9   5 547.367 22.9324   1
   0  -9   5 411.059 22.3091  -2
   0  -9   5 411.059 22.3091   1
  -1 -10   4 75.6245 24.2809  -2
   1  -9   5 75.6245 24.2809   1
  -2 -11   3 149.326 51.7890  -2
   2  -9   5 149.326 51.7890   1
   3  -9   5 38.3186 20.2449   1
   4  -9   5 9.02503 20.3596   1
   5  -9   5 39.3223 21.3476   1
 -12  -8   5 0.00262 72.7145   1
 -11  -8   5 33.9474 14.5073   1
  10   2  14 87.4332 69.1119  -2
 -10  -8   5 87.4332 69.1119   1
  -9  -8   5 355.496 42.5375   1
   8   0  13 90.2904 27.0806  -2
  -8  -8   5 90.2904 27.0806   1
   7  -1  12 195.700 26.5677  -2
  -7  -8   5 195.700 26.5677   1
   6  -2  11 474.863 24.0670  -2
  -6  -8   5 474.863 24.0670   1
   5  -3  10 984.592 26.2511  -2
  -5  -8   5 984.592 26.2511   1
   4  -4   9 468.480 18.3646  -2
  -4  -8   5 468.480 18.3646   1
   3  -5   8 371.290 16.1074  -2
  -3  -8   5 371.290 16.1074   1
   2  -6   7 10.3668 12.6272  -2
  -2  -8   5 10.3668 12.6272   1
   1  -7   6 340.332 18.1789  -2
  -1  -8   5 340.332 18.1789   1
   0  -8   5 209.101 17.8757  -2
   0  -8   5 209.101 17.8757   1
  -1  -9   4 391.090 27.6625  -2
   1  -8   5 391.090 27.6625   1
  -2 -10   3 835.501 37.0284  -2
   2  -8   5 835.501 37.0284   1
  -3 -11   2 127.172 43.3629  -2
   3  -8   5 127.172 43.3629   1
  -4 -12   1 -100.57 116.928  -2
   4  -8   5 -100.57 116.928   1
   5  -8   5 -7.8319 17.1273   1
   6  -8   5 -7.7997 17.5534   1
  11   4  16 -22.301 55.2408  -2
 -12  -7   5 -22.301 55.2408   1
  10   3  15 92.0175 34.6568  -2
 -11  -7   5 92.0175 34.6568   1
  10   3  14 75.6901 130.891  -2
 -10  -7   5 75.6901 130.891   1
  -9  -7   5 35.2259 14.1476   1
   8   1  13 -5.3930 119.995  -2
  -8  -7   5 -5.3930 119.995   1
   7   0  12 -48.172 50.1741  -2
  -7  -7   5 -48.172 50.1741   1
   6  -1  11 39.5620 23.9209  -2
  -6  -7   5 39.5620 23.9209   1
   5  -2  10 -2.3777 13.0441  -2
  -5  -7   5 -2.3777 13.0441   1
   4  -3   9 36.9050 11.9035  -2
  -4  -7   5 36.9050 11.9035   1
   3  -4   8 217.881 14.0332  -2
  -3  -7   5 217.881 14.0332   1
   2  -5   7 95.0962 12.1220  -2
  -2  -7   5 95.0962 12.1220   1
   1  -6   6 1123.32 29.9235  -2
  -1  -7   5 1123.32 29.9235   1
   0  -7   5 1087.24 37.9648  -2
   0  -7   5 1087.24 37.9648   1
  -1  -8   4 566.920 29.0686  -2
   1  -7   5 566.920 29.0686   1
  -2  -9   3 24.0258 20.9801  -2
   2  -7   5 24.0258 20.9801   1
  -3 -10   2 615.737 33.0492  -2
   3  -7   5 615.737 33.0492   1
  -4 -11   1 9.14522 26.4923  -2
   4  -7   5 9.14522 26.4923   1
   5  12   0 -83.329 114.939  -2
   5  -7   5 -83.329 114.939   1
   6  -7   5 192.154 40.5231   1
   7  -7   5 43.7650 32.4009   1
  11   5  16 138.099 86.2581  -2
 -12  -6   5 138.099 86.2581   1
  10   4  15 1.24385 40.7832  -2
 -11  -6   5 1.24385 40.7832   1
 -10  -6   5 3.75147 13.8046   1
  -9  -6   5 29.2346 13.8432   1
  -8  -6   5 22.4689 9.08739   1
   7   1  12 115.745 31.9018  -2
  -7  -6   5 115.745 31.9018   1
   6   0  11 1185.09 49.7800  -2
  -6  -6   5 1185.09 49.7800   1
   5  -1  10 1537.39 31.9205  -2
  -5  -6   5 1537.39 31.9205   1
   4  -2   9 728.516 19.4560  -2
  -4  -6   5 728.516 19.4560   1
   3  -3   8 297.845 13.1795  -2
  -3  -6   5 297.845 13.1795   1
   2  -4   7 741.798 21.9067  -2
  -2  -6   5 741.798 21.9067   1
   1  -5   6 1079.12 28.0535  -2
  -1  -6   5 1079.12 28.0535   1
   0  -6   5 38.5139 14.3728  -2
   0  -6   5 38.5139 14.3728   1
  -1  -7   4 259.832 19.2501  -2
   1  -6   5 259.832 19.2501   1
  -2  -8   3 -14.766 24.5880  -2
   2  -6   5 -14.766 24.5880   1
  -3  -9   2 79.8762 21.4554  -2
   3  -6   5 79.8762 21.4554   1
  -4 -10   1 238.520 27.7581  -2
   4  -6   5 238.520 27.7581   1
   5  11   0 239.481 40.2091  -2
   5  -6   5 239.481 40.2091   1
   6  -6   5 213.909 24.4017   1
   7  13   2 -64.962 121.741  -2
   7  -6   5 -64.962 121.741   1
   8  -6   5 -7.4401 60.8882   1
   8  14   3 -48.483 142.323  -2
   9  -6   5 -48.483 142.323   1
  11   6  16 17.4310 44.6014  -2
 -12  -5   5 17.4310 44.6014   1
  10   5  15 157.576 45.5735  -2
 -11  -5   5 157.576 45.5735   1
   9   4  14 217.020 42.0510  -2
 -10  -5   5 217.020 42.0510   1
  -9  -5   5 8.25611 8.58246   1
  -8  -5   5 190.392 19.7803   1
  -7  -5   5 110.809 16.7177   1
   6   1  11 270.072 31.4184  -2
  -6  -5   5 270.072 31.4184   1
   5   0  10 628.948 19.5384  -2
  -5  -5   5 628.948 19.5384   1
   4  -1   9 173.059 11.7076  -2
  -4  -5   5 173.059 11.7076   1
   3  -2   8 62.7502 9.25813  -2
  -3  -5   5 62.7502 9.25813   1
   2  -3   7 883.728 19.4759  -2
  -2  -5   5 883.728 19.4759   1
   1  -4   6 8.76061 8.71807  -2
  -1  -5   5 8.76061 8.71807   1
   0  -5   5 83.4466 12.4706  -2
   0  -5   5 83.4466 12.4706   1
  -1  -6   4 105.115 13.7442  -2
   1  -5   5 105.115 13.7442   1
  -2  -7   3 300.005 19.3227  -2
   2  -5   5 300.005 19.3227   1
  -3  -8   2 876.772 32.0071  -2
   3  -5   5 876.772 32.0071   1
  -4  -9   1 182.989 25.6727  -2
   4  -5   5 182.989 25.6727   1
   5  10   0 0.13019 25.6804  -2
   5  -5   5 0.13019 25.6804   1
   6  -5   5 854.969 46.3452   1
   7  12   2 76.1212 121.591  -2
   7  -5   5 76.1212 121.591   1
   8  -5   5 28.2204 60.8309   1
   9  -5   5 29.2260 64.4086   1
  11   7  16 128.790 85.5350  -2
 -12  -4   5 128.790 85.5350   1
  10   6  15 11.0271 40.7118  -2
 -11  -4   5 11.0271 40.7118   1
   9   5  14 338.713 47.7574  -2
 -10  -4   5 338.713 47.7574   1
   8   4  13 461.990 52.0831  -2
  -9  -4   5 461.990 52.0831   1
  -8  -4   5 220.615 20.1303   1
  -7  -4   5 9.20912 6.88518   1
  -6  -4   5 19.2533 5.60840   1
   5   1  10 177.618 18.6271  -2
  -5  -4   5 177.618 18.6271   1
   4   0   9 158.366 11.5585  -2
  -4  -4   5 158.366 11.5585   1
   3  -1   8 -11.369 7.79669  -2
  -3  -4   5 -11.369 7.79669   1
   2  -2   7 21.8956 7.66615  -2
  -2  -4   5 21.8956 7.66615   1
   1  -3   6 344.952 17.5277  -2
  -1  -4   5 344.952 17.5277   1
   0  -4   5 56.0342 11.6217  -2
   0  -4   5 56.0342 11.6217   1
  -1  -5   4 445.102 19.7235  -2
   1  -4   5 445.102 19.7235   1
  -2  -6   3 635.427 24.4700  -2
   2  -4   5 635.427 24.4700   1
  -3  -7   2 549.073 25.8992  -2
   3  -4   5 549.073 25.8992   1
  -4  -8   1 1734.65 51.1668  -2
   4  -4   5 1734.65 51.1668   1
   5   9   0 1377.90 44.0250  -2
   5  -4   5 1377.90 44.0250   1
   6  10   1 816.974 37.4045  -2
   6  -4   5 816.974 37.4045   1
   7  11   2 -6.7583 118.777  -2
   7  -4   5 -6.7583 118.777   1
   8  12   3 146.635 118.122  -2
   8  -4   5 146.635 118.122   1
   9  -4   5 -21.248 57.1953   1
  10  -4   5 -21.018 59.3118   1
  11   8  16 344.197 47.3233  -2
 -12  -3   5 344.197 47.3233   1
  10   7  15 -20.064 74.4585  -2
 -11  -3   5 -20.064 74.4585   1
   9   6  14 8.30186 26.5086  -2
 -10  -3   5 8.30186 26.5086   1
   8   5  13 73.3869 40.4740  -2
  -9  -3   5 73.3869 40.4740   1
  -8  -3   5 55.4681 9.34181   1
  -7  -3   5 15.7311 6.62404   1
  -6  -3   5 17.1321 6.21408   1
  -5  -3   5 70.5710 10.4015   1
   4   1   9 556.920 20.0904  -2
  -4  -3   5 556.920 20.0904   1
   3   0   8 -2.1568 10.5728  -2
  -3  -3   5 -2.1568 10.5728   1
   2  -1   7 1416.21 25.6868  -2
  -2  -3   5 1416.21 25.6868   1
   1  -2   6 3089.97 65.5118  -2
  -1  -3   5 3089.97 65.5118   1
   0  -3   5 5560.33 124.199  -2
   0  -3   5 5560.33 124.199   1
  -1  -4   4 2584.96 58.5605  -2
   1  -3   5 2584.96 58.5605   1
  -2  -5   3 702.242 24.9985  -2
   2  -3   5 702.242 24.9985   1
  -3  -6   2 321.961 17.4233  -2
   3  -3   5 321.961 17.4233   1
  -4  -7   1 238.476 19.3314  -2
   4  -3   5 238.476 19.3314   1
   5   8   0 2.79162 17.4503  -2
   5  -3   5 2.79162 17.4503   1
   6   9   1 161.257 22.6623  -2
   6  -3   5 161.257 22.6623   1
   7  10   2 86.7792 26.5945  -2
   7  -3   5 86.7792 26.5945   1
   8  11   3 351.540 124.234  -2
   8  -3   5 351.540 124.234   1
   9  -3   5 8.07665 14.4790   1
  10  -3   5 -2.3313 14.8364   1
  11  -3   5 -30.492 56.3393   1
  11   9  16 104.713 30.7415  -2
 -12  -2   5 104.713 30.7415   1
  10   8  15 -12.276 41.7834  -2
 -11  -2   5 -12.276 41.7834   1
   8   6  13 21.7380 26.0807  -2
  -9  -2   5 21.7380 26.0807   1
  -8  -2   5 53.3618 7.85033   1
  -7  -2   5 122.996 12.7672   1
  -6  -2   5 657.955 20.7435   1
  -5  -2   5 344.138 12.6545   1
  -4  -2   5 139.377 7.40500   1
   3   1   8 799.245 30.6339  -2
  -3  -2   5 799.245 30.6339   1
   2   0   7 1572.56 30.7060  -2
  -2  -2   5 1572.56 30.7060   1
   1  -1   6 642.038 20.1782  -2
  -1  -2   5 642.038 20.1782   1
   0  -2   5 523.184 19.8523  -2
   0  -2   5 523.184 19.8523   1
  -1  -3   4 423.158 18.3715  -2
   1  -2   5 423.158 18.3715   1
  -2  -4   3 463.501 19.7317  -2
   2  -2   5 463.501 19.7317   1
  -3  -5   2 19.6779 11.0299  -2
   3  -2   5 19.6779 11.0299   1
  -4  -6   1 534.314 22.0081  -2
   4  -2   5 534.314 22.0081   1
   5   7   0 655.714 26.9840  -2
   5  -2   5 655.714 26.9840   1
   6   8   1 319.932 23.4394  -2
   6  -2   5 319.932 23.4394   1
   7   9   2 401.320 28.0533  -2
   7  -2   5 401.320 28.0533   1
   8  10   3 912.393 54.8752  -2
   8  -2   5 912.393 54.8752   1
   9  11   4 54.2294 116.249  -2
   9  -2   5 54.2294 116.249   1
  10  -2   5 52.0377 25.0647   1
  12  -2   5 -4.0724 56.7633   1
  11  10  16 108.702 42.9762  -2
 -12  -1   5 108.702 42.9762   1
  10   9  15 50.7265 27.7272  -2
 -11  -1   5 50.7265 27.7272   1
   9   8  14 -25.372 24.7662  -2
 -10  -1   5 -25.372 24.7662   1
   8   7  13 314.146 24.0678  -2
  -9  -1   5 314.146 24.0678   1
   7   6  12 544.633 31.6253  -2
  -8  -1   5 544.633 31.6253   1
  -7  -1   5 1021.43 28.0381   1
  -6  -1   5 226.619 13.3996   1
  -5  -1   5 522.604 17.0943   1
  -4  -1   5 862.494 18.5555   1
  -3  -1   5 61.8388 5.06969   1
   2   1   7 1483.08 38.8758  -2
  -2  -1   5 1483.08 38.8758   1
   1   0   6 87.3938 9.55764  -2
  -1  -1   5 87.3938 9.55764   1
   0  -1   5 944.450 22.5283  -2
   0  -1   5 944.450 22.5283   1
  -1  -2   4 1063.87 30.2011  -2
   1  -1   5 1063.87 30.2011   1
  -2  -3   3 238.935 14.7907  -2
   2  -1   5 238.935 14.7907   1
  -3  -4   2 2164.68 53.6998  -2
   3  -1   5 2164.68 53.6998   1
  -4  -5   1 610.186 22.2544  -2
   4  -1   5 610.186 22.2544   1
   5   6   0 76.6681 13.0565  -2
   5  -1   5 76.6681 13.0565   1
   6   7   1 626.490 26.7271  -2
   6  -1   5 626.490 26.7271   1
   7   8   2 155.801 21.3696  -2
   7  -1   5 155.801 21.3696   1
   8   9   3 42.4419 99.5093  -2
   8  -1   5 42.4419 99.5093   1
   9  -1   5 138.295 19.1303   1
  10  -1   5 171.583 21.7988   1
  11  -1   5 45.1065 14.7529   1
  12  -1   5 9.63287 16.0966   1
  11  11  16 118.837 43.1876  -2
 -12   0   5 118.837 43.1876   1
  10  10  15 107.260 27.4633  -2
 -11   0   5 107.260 27.4633   1
   9   9  14 155.069 23.1005  -2
 -10   0   5 155.069 23.1005   1
   8   8  13 442.756 26.0835  -2
  -9   0   5 442.756 26.0835   1
   7   7  12 1106.89 45.1017  -2
  -8   0   5 1106.89 45.1017   1
  -7   0   5 44.7149 6.24300   1
  -6   0   5 69.8154 10.1487   1
  -5   0   5 106.831 9.97323   1
  -4   0   5 259.083 10.1598   1
  -3   0   5 14.8671 2.19994   1
   2   2   7 232.845 14.2538  -2
  -2   0   5 232.845 14.2538   1
   1   1   6 690.703 22.5553  -2
  -1   0   5 690.703 22.5553   1
   0   0   5 220.248 14.3161  -2
   0   0   5 220.248 14.3161   1
  -1  -1   4 1823.66 36.8068  -2
   1   0   5 1823.66 36.8068   1
  -2  -2   3 865.636 21.5037  -2
   2   0   5 865.636 21.5037   1
  -3  -3   2 1190.79 27.3156  -2
   3   0   5 1190.79 27.3156   1
  -4  -4   1 2163.28 53.9197  -2
   4   0   5 2163.28 53.9197   1
   5   5   0 3072.78 60.2527  -2
   5   0   5 3072.78 60.2527   1
   6   6   1 166.384 12.1831  -2
   6   0   5 166.384 12.1831   1
   7   7   2 -17.912 12.1179  -2
   7   0   5 -17.912 12.1179   1
   8   8   3 24.5579 19.3754  -2
   8   0   5 24.5579 19.3754   1
   9   9   4 324.745 28.4706  -2
   9   0   5 324.745 28.4706   1
  10  10   5 196.296 123.175  -2
  10   0   5 196.296 123.175   1
  11   0   5 9.97630 13.1687   1
  12   0   5 65.3008 17.8770   1
  13   0   5 19.2479 15.7757   1
  11  12  16 134.799 45.1495  -2
 -12   1   5 134.799 45.1495   1
  10  11  15 47.8187 37.4869  -2
 -11   1   5 47.8187 37.4869   1
   9  10  14 254.259 42.1997  -2
 -10   1   5 254.259 42.1997   1
   8   9  13 13.0055 34.1807  -2
  -9   1   5 13.0055 34.1807   1
   7   8  12 59.2766 32.7778  -2
  -8   1   5 59.2766 32.7778   1
   6   7  11 22.9922 29.8763  -2
  -7   1   5 22.9922 29.8763   1
  -6   1   5 70.5682 10.4478   1
  -5   1   5 129.035 10.4369   1
  -4   1   5 316.627 12.2631   1
  -3   1   5 620.444 12.3680   1
  -2   1   5 61.8019 5.23287   1
   1   2   6 2007.66 69.8990  -2
  -1   1   5 2007.66 69.8990   1
   0   1   5 1906.22 66.9926  -2
   0   1   5 1906.22 66.9926   1
  -1   0   4 2302.56 55.3360  -2
   1   1   5 2302.56 55.3360   1
  -2  -1   3 809.056 20.1326  -2
   2   1   5 809.056 20.1326   1
  -3  -2   2 739.884 19.2772  -2
   3   1   5 739.884 19.2772   1
  -4  -3   1 381.998 14.3646  -2
   4   1   5 381.998 14.3646   1
   5   4   0 74.2268 14.6168  -2
   5   1   5 74.2268 14.6168   1
   6   5   1 112.045 65.5481  -2
   6   1   5 112.045 65.5481   1
   7   6   2 315.114 14.7431  -2
   7   1   5 315.114 14.7431   1
   8   7   3 -22.432 17.8505  -2
   8   1   5 -22.432 17.8505   1
   9   8   4 768.102 36.2608  -2
   9   1   5 768.102 36.2608   1
  10   9   5 162.342 110.700  -2
  10   1   5 162.342 110.700   1
  11  10   6 0.72490 112.751  -2
  11   1   5 0.72490 112.751   1
  12   1   5 39.1561 17.3604   1
  13   1   5 81.5001 28.3867   1
  10  12  15 34.5995 40.2149  -2
 -11   2   5 34.5995 40.2149   1
   9  11  14 152.957 29.4972  -2
 -10   2   5 152.957 29.4972   1
   8  10  13 165.097 28.0681  -2
  -9   2   5 165.097 28.0681   1
   7   9  12 523.894 35.2111  -2
  -8   2   5 523.894 35.2111   1
   6   8  11 170.984 36.2093  -2
  -7   2   5 170.984 36.2093   1
  -6   2   5 55.5797 6.91410   1
  -5   2   5 14.6311 4.89777   1
  -4   2   5 455.506 15.4817   1
  -3   2   5 2739.68 67.3345   1
  -2   2   5 1024.79 26.4412   1
  -1   2   5 611.940 17.7505   1
   0   2   5 10.9131 17.1055  -2
   0   2   5 10.9131 17.1055   1
  -1   1   4 139.231 18.1811  -2
   1   2   5 139.231 18.1811   1
  -2   0   3 599.051 29.1806  -2
   2   2   5 599.051 29.1806   1
  -3  -1   2 157.717 10.7724  -2
   3   2   5 157.717 10.7724   1
  -4  -2   1 2361.18 40.6106  -2
   4   2   5 2361.18 40.6106   1
   5   3   0 1719.36 43.6733  -2
   5   2   5 1719.36 43.6733   1
   6   4   1 1129.32 26.7089  -2
   6   2   5 1129.32 26.7089   1
   7   5   2 166.430 11.9168  -2
   7   2   5 166.430 11.9168   1
   8   6   3 132.608 17.1298  -2
   8   2   5 132.608 17.1298   1
   9   7   4 60.5977 22.3573  -2
   9   2   5 60.5977 22.3573   1
  10   8   5 176.039 26.7615  -2
  10   2   5 176.039 26.7615   1
  11   2   5 184.355 31.8902   1
  12   2   5 8.82161 45.7996   1
  13   2   5 20.4659 14.6713   1
  14   2   5 70.7471 29.4911   1
   9  12  14 46.1844 37.5701  -2
 -10   3   5 46.1844 37.5701   1
   8  11  13 139.767 29.9004  -2
  -9   3   5 139.767 29.9004   1
   7  10  12 424.956 34.4362  -2
  -8   3   5 424.956 34.4362   1
   6   9  11 593.842 34.5360  -2
  -7   3   5 593.842 34.5360   1
   5   8  10 143.353 76.9924  -2
  -6   3   5 143.353 76.9924   1
  -5   3   5 77.8673 10.7325   1
  -4   3   5 273.589 15.5984   1
  -3   3   5 397.338 17.7120   1
  -2   3   5 64.7019 9.93797   1
  -1   3   5 259.523 13.9629   1
   0   3   5 887.384 26.6189   1
   1   3   5 651.091 20.8230   1
  -2   1   3 2210.13 77.1301  -2
   2   3   5 2210.13 77.1301   1
  -3   0   2 1894.54 47.7301  -2
   3   3   5 1894.54 47.7301   1
  -4  -1   1 543.406 17.4865  -2
   4   3   5 543.406 17.4865   1
   5   2   0 104.499 12.2237  -2
   5   3   5 104.499 12.2237   1
   6   3   1 1476.36 29.1913  -2
   6   3   5 1476.36 29.1913   1
   7   4   2 247.971 11.5974  -2
   7   3   5 247.971 11.5974   1
   8   5   3 -5.1182 14.4796  -2
   8   3   5 -5.1182 14.4796   1
   9   6   4 558.882 31.3317  -2
   9   3   5 558.882 31.3317   1
  10   7   5 617.110 36.2782  -2
  10   3   5 617.110 36.2782   1
  11   8   6 122.310 100.796  -2
  11   3   5 122.310 100.796   1
  12   9   7 187.154 101.664  -2
  12   3   5 187.154 101.664   1
  13  10   7 14.8028 39.8719  -2
  13   3   5 14.8028 39.8719   1
  14  10   8 241.365 34.7611  -2
  14   3   5 241.365 34.7611   1
   7  11  12 94.2731 28.7179  -2
  -8   4   5 94.2731 28.7179   1
   6  10  11 4.50637 25.4516  -2
  -7   4   5 4.50637 25.4516   1
   5   9  10 205.636 92.7565  -2
  -6   4   5 205.636 92.7565   1
  -5   4   5 -3.4639 4.09914   1
  -4   4   5 125.374 14.3273   1
  -3   4   5 185.281 15.5803   1
  -2   4   5 1389.04 37.4193   1
  -1   4   5 4.67968 4.63584   1
   0   4   5 16.1712 4.24160   1
   1   4   5 1874.37 48.5690   1
   2   4   5 655.703 22.4105   1
  -3   1   2 312.170 25.1352  -2
   3   4   5 312.170 25.1352   1
   4   4   5 1093.31 26.2332   1
   5   1   0 173.741 16.3530  -2
   5   4   5 173.741 16.3530   1
   6   2   1 271.137 22.8552  -2
   6   4   5 271.137 22.8552   1
   7   3   2 109.213 20.6725  -2
   7   4   5 109.213 20.6725   1
   8   4   3 54.6011 18.1344  -2
   8   4   5 54.6011 18.1344   1
   9   5   4 19.7058 18.5053  -2
   9   4   5 19.7058 18.5053   1
  10   6   5 220.040 27.0736  -2
  10   4   5 220.040 27.0736   1
  12   4   5 128.236 31.7210   1
  13   9   7 -7.0173 40.8797  -2
  13   4   5 -7.0173 40.8797   1
  14  10   8 95.8830 45.4411  -2
  14   4   5 95.8830 45.4411   1
   7  12  12 326.939 50.1979  -2
  -8   5   5 326.939 50.1979   1
   6  11  11 459.698 35.1786  -2
  -7   5   5 459.698 35.1786   1
   5  10  10 57.8955 100.902  -2
  -6   5   5 57.8955 100.902   1
   4   9   9 -26.888 95.2515  -2
  -5   5   5 -26.888 95.2515   1
  -4   5   5 1373.81 44.5394   1
  -3   5   5 273.183 19.0713   1
  -2   5   5 105.997 44.8545   1
  -1   5   5 454.652 21.2339   1
   0   5   5 18.8622 4.96635   1
   1   5   5 164.779 13.2813   1
   2   5   5 1258.12 36.7389   1
   3   5   5 1069.22 25.9757   1
   4   5   5 658.012 19.9736   1
   5   5   5 4.04846 5.05187   1
   6   1   1 46.7729 20.0092  -2
   6   5   5 46.7729 20.0092   1
   7   2   2 354.594 26.9142  -2
   7   5   5 354.594 26.9142   1
   8   3   3 372.613 28.6816  -2
   8   5   5 372.613 28.6816   1
   9   4   4 939.329 36.5688  -2
   9   5   5 939.329 36.5688   1
  10   5   5 796.645 36.8080  -2
  10   5   5 796.645 36.8080   1
  13   8   7 208.301 45.3452  -2
  13   5   5 208.301 45.3452   1
  14   9   8 78.7265 46.8063  -2
  14   5   5 78.7265 46.8063   1
   6  12  11 195.723 46.9584  -2
  -7   6   5 195.723 46.9584   1
   5  11  10 51.9460 107.312  -2
  -6   6   5 51.9460 107.312   1
   4  10   9 82.3081 101.109  -2
  -5   6   5 82.3081 101.109   1
  -4   6   5 1.07738 5.55255   1
   2   8   7 419.657 106.032  -2
  -3   6   5 419.657 106.032   1
  -2   6   5 778.788 28.4540   1
  -1   6   5 63.6537 10.4885   1
   0   6   5 44.8339 7.08113   1
   1   6   5 13.2267 4.87493   1
   2   6   5 101.656 13.1416   1
   3   6   5 3.01924 4.78214   1
   4   6   5 1866.04 41.3171   1
   5   6   5 1000.75 27.5069   1
   6   0   1 683.980 51.8379  -2
   6   6   5 683.980 51.8379   1
   7   1   2 236.974 27.8126  -2
   7   6   5 236.974 27.8126   1
   8   2   3 524.473 29.2623  -2
   8   6   5 524.473 29.2623   1
   9   3   4 79.4420 22.0648  -2
   9   6   5 79.4420 22.0648   1
  10   4   5 368.252 46.7305  -2
  10   6   5 368.252 46.7305   1
  14   8   8 119.618 48.9018  -2
  14   6   5 119.618 48.9018   1
   4  11   9 -87.723 106.905  -2
  -5   7   5 -87.723 106.905   1
  -4   7   5 0.53347 6.55197   1
  -3   7   5 -4.7614 5.78342   1
  -2   7   5 57.6205 11.8882   1
  -1   7   5 60.9424 11.6916   1
   0   7   5 14.9985 5.71787   1
   1   7   5 116.871 14.6957   1
   2   7   5 417.981 21.5411   1
   3   7   5 1106.30 36.4272   1
   4   7   5 734.898 22.7323   1
   5   7   5 30.5593 6.21983   1
   6   7   5 598.807 19.6428   1
   7   0   2 210.691 28.6874  -2
   7   7   5 210.691 28.6874   1
   8   1   3 215.074 26.4001  -2
   8   7   5 215.074 26.4001   1
   9   2   4 414.085 30.4177  -2
   9   7   5 414.085 30.4177   1
  10   3   5 563.318 34.2795  -2
  10   7   5 563.318 34.2795   1
   4  12   9 -68.974 40.3171  -2
  -5   8   5 -68.974 40.3171   1
   3  11   8 -79.687 111.511  -2
  -4   8   5 -79.687 111.511   1
   2  10   7 327.897 112.932  -2
  -3   8   5 327.897 112.932   1
   1   9   6 720.063 112.357  -2
  -2   8   5 720.063 112.357   1
   0   8   5 -44.912 80.8701  -2
  -1   8   5 -44.912 80.8701   1
  -1   8   5 -48.887 79.2992  -2
   0   8   5 -48.887 79.2992   1
   1   8   5 968.949 35.6887   1
   2   8   5 228.302 18.8386   1
   3   8   5 -2.1266 5.20001   1
   4   8   5 -1.2649 4.67979   1
   5   8   5 98.3709 13.0318   1
   6   8   5 170.890 15.8849   1
   7  -1   2 133.952 38.3029  -2
   7   8   5 133.952 38.3029   1
   8   0   3 115.370 44.9532  -2
   8   8   5 115.370 44.9532   1
   9   1   4 76.5341 28.5506  -2
   9   8   5 76.5341 28.5506   1
  10   2   5 241.625 32.3966  -2
  10   8   5 241.625 32.3966   1
  11   3   6 388.876 42.7725  -2
  11   8   5 388.876 42.7725   1
   3  13   9 139.688 39.6379  -2
  -5   9   5 139.688 39.6379   1
   4  13   9 150.010 54.0054  -2
  -5   9   5 150.010 54.0054   1
   3  12   8 403.223 57.7749  -2
  -4   9   5 403.223 57.7749   1
  -3   9   5 177.530 29.9562   1
   1  10   6 -21.803 98.9225  -2
  -2   9   5 -21.803 98.9225   1
  -1   9   5 22.2722 8.16212   1
   0   9   5 29.9257 7.96897   1
   1   9   5 20.0000 6.72582   1
   2   9   5 235.707 20.4051   1
   3   9   5 -13.735 9.74504   1
   4   9   5 -6.4110 6.36937   1
   5   9   5 9.72560 6.44235   1
   6   9   5 278.151 17.9876   1
   7   9   5 45.3553 12.9603   1
   8  -1   3 32.8936 41.6008  -2
   8   9   5 32.8936 41.6008   1
   9   0   4 234.365 37.7540  -2
   9   9   5 234.365 37.7540   1
  10   1   5 588.860 39.6663  -2
  10   9   5 588.860 39.6663   1
  11   2   6 92.1121 38.6267  -2
  11   9   5 92.1121 38.6267   1
   4  15  10 432.022 54.1268  -2
  -6  10   5 432.022 54.1268   1
   3  14   9 225.898 44.4122  -2
  -5  10   5 225.898 44.4122   1
   4  14   9 510.903 65.9970  -2
  -5  10   5 510.903 65.9970   1
   3  13   8 142.372 54.5682  -2
  -4  10   5 142.372 54.5682   1
   2  12   7 34.0742 49.0250  -2
  -3  10   5 34.0742 49.0250   1
   1  11   6 102.318 48.6627  -2
  -2  10   5 102.318 48.6627   1
  -1  10   5 3.17572 7.76250   1
   0  10   5 -1.5804 6.58562   1
   1  10   5 50.2984 9.06297   1
   2  10   5 36.4452 8.29262   1
   3  10   5 -0.1599 7.03033   1
   4  10   5 98.5423 18.9432   1
   5  10   5 1.75218 6.48729   1
   6  10   5 48.0064 8.61306   1
   7  10   5 548.348 22.2473   1
   8  10   5 941.542 29.8046   1
   9  10   5 117.956 21.2031   1
  10   0   5 71.9463 51.6894  -2
  10  10   5 71.9463 51.6894   1
  14  10   5 125.480 40.9068   1
   3  15   9 22.6449 42.0708  -2
  -5  11   5 22.6449 42.0708   1
   2  14   8 -27.066 38.8878  -2
  -4  11   5 -27.066 38.8878   1
   3  14   8 93.0461 56.1629  -2
  -4  11   5 93.0461 56.1629   1
   1  13   7 7.79171 36.1650  -2
  -3  11   5 7.79171 36.1650   1
   2  13   7 354.790 57.7738  -2
  -3  11   5 354.790 57.7738   1
   1  12   6 58.8012 49.5100  -2
  -2  11   5 58.8012 49.5100   1
  -1  11   5 15.9191 11.2194   1
   0  11   5 4.19192 7.78432   1
   1  11   5 220.528 24.0224   1
   2  11   5 458.169 29.2464   1
   3  11   5 920.042 39.7442   1
  -5   7   1 66.5198 43.5125  -2
   4  11   5 66.5198 43.5125   1
  -6   6   0 62.1614 42.6967  -2
   5  11   5 62.1614 42.6967   1
   7  -5   1 275.774 48.4828  -2
   6  11   5 275.774 48.4828   1
   7  11   5 19.4360 8.87731   1
   8  11   5 -5.9883 8.60419   1
   9  11   5 -8.3301 15.5902   1
  10  11   5 24.8888 14.4571   1
   2  15   8 -26.343 41.9294  -2
  -4  12   5 -26.343 41.9294   1
   3  15   8 160.336 59.9634  -2
  -4  12   5 160.336 59.9634   1
   1  14   7 75.2337 40.5608  -2
  -3  12   5 75.2337 40.5608   1
   0  13   6 116.324 40.6075  -2
  -2  12   5 116.324 40.6075   1
  -1  12   5 4.74986 11.2137   1
  -1  11   4 141.932 50.1501  -2
   0  12   5 141.932 50.1501   1
   1  12   5 260.148 26.4152   1
   2  12   5 81.6787 16.8386   1
   3  12   5 2.70387 8.75001   1
  -5   8   1 139.124 49.6885  -2
   4  12   5 139.124 49.6885   1
  -6   7   0 83.6213 44.3689  -2
   5  12   5 83.6213 44.3689   1
   7  -6   1 65.6239 34.6247  -2
   6  12   5 65.6239 34.6247   1
   8  -5   2 18.2290 46.3306  -2
   7  12   5 18.2290 46.3306   1
   9  -4   3 75.0097 43.5268  -2
   8  12   5 75.0097 43.5268   1
   9  12   5 -13.362 16.3125   1
  10  12   5 -26.036 20.3472   1
  11  -2   5 -10.134 74.2757  -2
  11  12   5 -10.134 74.2757   1
   1  15   7 52.7481 44.6681  -2
  -3  13   5 52.7481 44.6681   1
   2  15   7 200.076 64.2610  -2
  -3  13   5 200.076 64.2610   1
   0  14   6 148.597 44.2712  -2
  -2  13   5 148.597 44.2712   1
   0  13   5 316.230 63.6878  -2
  -1  13   5 316.230 63.6878   1
  -1  13   5 305.541 46.9305  -2
  -1  13   5 305.541 46.9305   1
   0  13   5 146.716 27.0014   1
   1  13   5 13.5809 9.80401   1
   2  13   5 -5.7747 9.02330   1
  -4  10   2 7.65547 44.1238  -2
   3  13   5 7.65547 44.1238   1
  -5   9   1 10.5395 33.2537  -2
   4  13   5 10.5395 33.2537   1
  -6   8   0 104.719 50.9858  -2
   5  13   5 104.719 50.9858   1
   7  -7   1 300.973 39.2916  -2
   6  13   5 300.973 39.2916   1
   8  -6   2 234.290 40.2937  -2
   7  13   5 234.290 40.2937   1
   9  -5   3 70.8291 47.5831  -2
   8  13   5 70.8291 47.5831   1
   9  13   5 20.7426 20.0277   1
  10  13   5 21.9568 21.5687   1
  11  13   5 -3.8224 15.8519   1
  12  13   5 67.8908 22.4130   1
  -1  14   5 80.9594 45.3716  -2
  -1  14   5 80.9594 45.3716   1
   1  14   5 23.8101 19.7868   1
   2  14   5 28.9802 19.2961   1
  -4  11   2 39.2905 35.0330  -2
   3  14   5 39.2905 35.0330   1
  -5  10   1 144.954 38.0481  -2
   4  14   5 144.954 38.0481   1
  -6   9   0 66.6399 36.1987  -2
   5  14   5 66.6399 36.1987   1
   7  -8   1 52.4777 36.6258  -2
   6  14   5 52.4777 36.6258   1
   8  -7   2 377.396 42.2993  -2
   7  14   5 377.396 42.2993   1
   9  -6   3 215.535 43.0522  -2
   8  14   5 215.535 43.0522   1
  11  14   5 13.2156 21.9512   1
   2  15   5 46.3375 23.0872   1
  -4  12   2 249.043 68.1830  -2
   3  15   5 249.043 68.1830   1
  -5  11   1 66.6689 37.7090  -2
   4  15   5 66.6689 37.7090   1
  -6  10   0 12.2588 36.4553  -2
   5  15   5 12.2588 36.4553   1
   7  -9   1 74.3825 38.4961  -2
   6  15   5 74.3825 38.4961   1
   8  -8   2 96.9924 39.2383  -2
   7  15   5 96.9924 39.2383   1
   9  -7   3 133.763 51.6336  -2
   8  15   5 133.763 51.6336   1
   9  15   5 -23.858 18.3455   1
   7  -5  13 104.840 124.056  -2
  -7 -12   6 104.840 124.056   1
   6  -6  12 12.3896 19.9650  -2
  -6 -12   6 12.3896 19.9650   1
   5  -7  11 124.009 37.9539  -2
  -5 -12   6 124.009 37.9539   1
   4  -8  10 169.302 26.3515  -2
  -4 -12   6 169.302 26.3515   1
   2 -10   8 153.325 48.4726  -2
  -2 -12   6 153.325 48.4726   1
   1 -11   7 104.005 53.9861  -2
  -1 -12   6 104.005 53.9861   1
   1 -12   6 18.0331 21.2310   1
  -9 -11   6 22.1052 18.9362   1
   8  -3  14 95.8137 132.856  -2
  -8 -11   6 95.8137 132.856   1
   7  -4  13 104.222 33.4748  -2
  -7 -11   6 104.222 33.4748   1
   6  -5  12 40.3511 111.492  -2
  -6 -11   6 40.3511 111.492   1
   5  -6  11 191.353 19.1461  -2
  -5 -11   6 191.353 19.1461   1
   4  -7  10 178.601 18.4306  -2
  -4 -11   6 178.601 18.4306   1
   3  -8   9 67.6882 16.8283  -2
  -3 -11   6 67.6882 16.8283   1
   2  -9   8 88.3120 21.6802  -2
  -2 -11   6 88.3120 21.6802   1
   1 -10   7 62.5186 44.2790  -2
  -1 -11   6 62.5186 44.2790   1
   0 -11   6 -32.273 50.3028  -2
   0 -11   6 -32.273 50.3028   1
  -1 -12   5 -36.526 54.8528  -2
   1 -11   6 -36.526 54.8528   1
   2 -11   6 2.95804 20.0974   1
   3 -11   6 19.1269 21.4802   1
 -10 -10   6 201.088 51.7562   1
   9  -1  15 33.6129 41.2707  -2
  -9 -10   6 33.6129 41.2707   1
   8  -2  14 115.933 45.2419  -2
  -8 -10   6 115.933 45.2419   1
   7  -3  13 84.3381 32.9091  -2
  -7 -10   6 84.3381 32.9091   1
   6  -4  12 80.7549 28.5988  -2
  -6 -10   6 80.7549 28.5988   1
   5  -5  11 75.3071 18.5607  -2
  -5 -10   6 75.3071 18.5607   1
   4  -6  10 9.36315 13.7645  -2
  -4 -10   6 9.36315 13.7645   1
   3  -7   9 24.9901 14.8163  -2
  -3 -10   6 24.9901 14.8163   1
   2  -8   8 35.7598 15.2956  -2
  -2 -10   6 35.7598 15.2956   1
   1  -9   7 0.21701 15.7844  -2
  -1 -10   6 0.21701 15.7844   1
   0 -10   6 -12.688 21.5930  -2
   0 -10   6 -12.688 21.5930   1
  -1 -11   5 -42.492 45.7146  -2
   1 -10   6 -42.492 45.7146   1
  -2 -12   4 75.0955 57.4446  -2
   2 -10   6 75.0955 57.4446   1
  -3 -13   3 -0.5880 138.802  -2
   3 -10   6 -0.5880 138.802   1
  -4 -14   2 -121.19 139.529  -2
   4 -10   6 -121.19 139.529   1
  10   1  15 2.86480 69.3804  -2
 -10  -9   6 2.86480 69.3804   1
  -9  -9   6 34.4655 17.0753   1
   8  -1  14 -20.090 32.1215  -2
  -8  -9   6 -20.090 32.1215   1
   7  -2  13 -20.714 25.4865  -2
  -7  -9   6 -20.714 25.4865   1
   6  -3  12 0.49340 16.4460  -2
  -6  -9   6 0.49340 16.4460   1
   5  -4  11 53.8582 16.6811  -2
  -5  -9   6 53.8582 16.6811   1
   4  -5  10 -39.644 30.4285  -2
  -4  -9   6 -39.644 30.4285   1
   3  -6   9 140.512 15.5053  -2
  -3  -9   6 140.512 15.5053   1
   2  -7   8 273.250 18.6879  -2
  -2  -9   6 273.250 18.6879   1
   1  -8   7 203.436 18.3236  -2
  -1  -9   6 203.436 18.3236   1
   0  -9   6 65.7532 17.3768  -2
   0  -9   6 65.7532 17.3768   1
  -1 -10   5 635.989 34.9237  -2
   1  -9   6 635.989 34.9237   1
  -2 -11   4 0.01822 114.610  -2
   2  -9   6 0.01822 114.610   1
   3  -9   6 -8.6538 17.8206   1
  -4 -13   2 -1.3036 130.329  -2
   4  -9   6 -1.3036 130.329   1
   5  -9   6 40.7987 24.0273   1
  -5 -14   1 18.1990 61.1930  -2
   6  -9   6 18.1990 61.1930   1
  11   3  16 -98.250 156.216  -2
 -11  -8   6 -98.250 156.216   1
  10   2  15 3.24927 63.5714  -2
 -10  -8   6 3.24927 63.5714   1
  -9  -8   6 -5.1712 9.11547   1
   8   0  14 -20.121 56.3532  -2
  -8  -8   6 -20.121 56.3532   1
   7  -1  13 99.3637 25.7147  -2
  -7  -8   6 99.3637 25.7147   1
   6  -2  12 -0.2605 16.1324  -2
  -6  -8   6 -0.2605 16.1324   1
   5  -3  11 128.000 15.8846  -2
  -5  -8   6 128.000 15.8846   1
   4  -4  10 158.689 16.2190  -2
  -4  -8   6 158.689 16.2190   1
   3  -5   9 16.9122 14.5211  -2
  -3  -8   6 16.9122 14.5211   1
   2  -6   8 548.037 21.8026  -2
  -2  -8   6 548.037 21.8026   1
   1  -7   7 571.162 22.5761  -2
  -1  -8   6 571.162 22.5761   1
   0  -8   6 808.805 27.9440  -2
   0  -8   6 808.805 27.9440   1
  -1  -9   5 584.666 32.4592  -2
   1  -8   6 584.666 32.4592   1
  -2 -10   4 84.9962 24.3156  -2
   2  -8   6 84.9962 24.3156   1
  -3 -11   3 78.2234 25.8663  -2
   3  -8   6 78.2234 25.8663   1
  -4 -12   2 134.546 48.7181  -2
   4  -8   6 134.546 48.7181   1
  -5 -13   1 -57.796 128.219  -2
   5  -8   6 -57.796 128.219   1
   6  -8   6 134.980 43.6091   1
   7  -8   6 131.243 42.8989   1
  10   3  16 -63.643 70.4488  -2
 -11  -7   6 -63.643 70.4488   1
  10   3  15 -95.353 136.288  -2
 -10  -7   6 -95.353 136.288   1
   9   2  15 167.327 34.3428  -2
 -10  -7   6 167.327 34.3428   1
   9   2  14 -39.608 122.619  -2
  -9  -7   6 -39.608 122.619   1
   8   1  14 38.3861 123.141  -2
  -8  -7   6 38.3861 123.141   1
   7   0  13 -7.1676 29.0338  -2
  -7  -7   6 -7.1676 29.0338   1
   6  -1  12 862.132 29.7986  -2
  -6  -7   6 862.132 29.7986   1
   5  -2  11 850.117 24.0700  -2
  -5  -7   6 850.117 24.0700   1
   4  -3  10 949.359 24.1822  -2
  -4  -7   6 949.359 24.1822   1
   3  -4   9 322.390 16.1328  -2
  -3  -7   6 322.390 16.1328   1
   2  -5   8 97.8679 12.5356  -2
  -2  -7   6 97.8679 12.5356   1
   1  -6   7 25.2070 12.0245  -2
  -1  -7   6 25.2070 12.0245   1
   0  -7   6 33.4258 16.4032  -2
   0  -7   6 33.4258 16.4032   1
  -1  -8   5 346.955 24.8792  -2
   1  -7   6 346.955 24.8792   1
  -2  -9   4 571.987 28.7738  -2
   2  -7   6 571.987 28.7738   1
  -3 -10   3 170.285 26.1008  -2
   3  -7   6 170.285 26.1008   1
  -4 -11   2 13.4879 27.0741  -2
   4  -7   6 13.4879 27.0741   1
  -5 -12   1 -60.270 120.640  -2
   5  -7   6 -60.270 120.640   1
   6  -7   6 6.51110 18.7620   1
   7  -7   6 253.537 45.8765   1
  11   5  17 -12.781 43.6135  -2
 -12  -6   6 -12.781 43.6135   1
  10   4  16 54.8133 42.7614  -2
 -11  -6   6 54.8133 42.7614   1
   9   3  15 88.4142 39.5970  -2
 -10  -6   6 88.4142 39.5970   1
   9   3  14 182.848 128.414  -2
  -9  -6   6 182.848 128.414   1
  -8  -6   6 82.8040 22.3062   1
  -7  -6   6 24.7783 7.19061   1
   6   0  12 7.90925 53.6799  -2
  -6  -6   6 7.90925 53.6799   1
   5  -1  11 113.743 15.6142  -2
  -5  -6   6 113.743 15.6142   1
   4  -2  10 50.6873 11.8972  -2
  -4  -6   6 50.6873 11.8972   1
   3  -3   9 11.5677 10.5705  -2
  -3  -6   6 11.5677 10.5705   1
   2  -4   8 106.734 12.7742  -2
  -2  -6   6 106.734 12.7742   1
   1  -5   7 18.6256 10.9377  -2
  -1  -6   6 18.6256 10.9377   1
   0  -6   6 599.681 26.3117  -2
   0  -6   6 599.681 26.3117   1
  -1  -7   5 928.644 32.9128  -2
   1  -6   6 928.644 32.9128   1
  -2  -8   4 213.593 21.1226  -2
   2  -6   6 213.593 21.1226   1
  -3  -9   3 513.426 30.2942  -2
   3  -6   6 513.426 30.2942   1
  -4 -10   2 55.3815 25.8283  -2
   4  -6   6 55.3815 25.8283   1
  -5 -11   1 -13.440 27.4676  -2
   5  -6   6 -13.440 27.4676   1
   7  -6   6 69.4349 22.3922   1
   8  14   2 -58.068 134.545  -2
   8  -6   6 -58.068 134.545   1
   9  -6   6 -23.846 62.8303   1
  11   6  17 411.848 47.4227  -2
 -12  -5   6 411.848 47.4227   1
  10   5  16 472.166 48.6818  -2
 -11  -5   6 472.166 48.6818   1
   9   4  15 -3.3940 68.0558  -2
 -10  -5   6 -3.3940 68.0558   1
   8   3  14 417.413 50.1294  -2
  -9  -5   6 417.413 50.1294   1
  -8  -5   6 43.7469 12.6817   1
  -7  -5   6 152.946 18.3208   1
   6   1  12 594.549 43.9017  -2
  -6  -5   6 594.549 43.9017   1
   5   0  11 863.906 30.2749  -2
  -5  -5   6 863.906 30.2749   1
   4  -1  10 167.960 13.2625  -2
  -4  -5   6 167.960 13.2625   1
   3  -2   9 518.034 21.0011  -2
  -3  -5   6 518.034 21.0011   1
   2  -3   8 1021.96 22.0131  -2
  -2  -5   6 1021.96 22.0131   1
   1  -4   7 413.722 16.9042  -2
  -1  -5   6 413.722 16.9042   1
   0  -5   6 422.731 20.7716  -2
   0  -5   6 422.731 20.7716   1
  -1  -6   5 1079.86 35.3873  -2
   1  -5   6 1079.86 35.3873   1
  -2  -7   4 85.4142 16.0379  -2
   2  -5   6 85.4142 16.0379   1
  -3  -8   3 274.513 23.2326  -2
   3  -5   6 274.513 23.2326   1
  -4  -9   2 792.274 36.5066  -2
   4  -5   6 792.274 36.5066   1
  -5 -10   1 170.385 28.2230  -2
   5  -5   6 170.385 28.2230   1
   6  11   0 18.0617 46.2833  -2
   6  -5   6 18.0617 46.2833   1
   7  12   1 141.954 41.6929  -2
   7  -5   6 141.954 41.6929   1
   8  13   2 -3.4483 123.824  -2
   8  -5   6 -3.4483 123.824   1
  11   7  17 70.6780 48.7994  -2
 -12  -4   6 70.6780 48.7994   1
  10   6  16 130.654 32.4768  -2
 -11  -4   6 130.654 32.4768   1
   9   5  15 -16.083 37.9419  -2
 -10  -4   6 -16.083 37.9419   1
   8   4  14 131.900 41.7098  -2
  -9  -4   6 131.900 41.7098   1
  -8  -4   6 60.8893 12.7938   1
  -7  -4   6 193.808 18.3949   1
  -6  -4   6 48.7419 7.40599   1
   5   1  11 586.151 33.0060  -2
  -5  -4   6 586.151 33.0060   1
   4   0  10 397.675 16.6490  -2
  -4  -4   6 397.675 16.6490   1
   3  -1   9 353.999 13.1979  -2
  -3  -4   6 353.999 13.1979   1
   2  -2   8 767.859 20.6375  -2
  -2  -4   6 767.859 20.6375   1
   1  -3   7 1831.56 49.1377  -2
  -1  -4   6 1831.56 49.1377   1
   0  -4   6 1117.32 34.8030  -2
   0  -4   6 1117.32 34.8030   1
  -1  -5   5 -11.171 11.6384  -2
   1  -4   6 -11.171 11.6384   1
  -2  -6   4 46.7438 12.7882  -2
   2  -4   6 46.7438 12.7882   1
  -3  -7   3 90.9779 14.3363  -2
   3  -4   6 90.9779 14.3363   1
  -4  -8   2 223.183 23.4855  -2
   4  -4   6 223.183 23.4855   1
  -5  -9   1 206.362 25.7126  -2
   5  -4   6 206.362 25.7126   1
   6  10   0 148.935 27.4299  -2
   6  -4   6 148.935 27.4299   1
   7  11   1 382.667 34.1803  -2
   7  -4   6 382.667 34.1803   1
   8  12   2 55.1658 112.902  -2
   8  -4   6 55.1658 112.902   1
   9  13   3 -38.334 120.165  -2
   9  -4   6 -38.334 120.165   1
  11   8  17 115.379 48.1187  -2
 -12  -3   6 115.379 48.1187   1
  10   7  16 15.6096 38.4691  -2
 -11  -3   6 15.6096 38.4691   1
   9   6  15 123.957 28.8642  -2
 -10  -3   6 123.957 28.8642   1
   8   5  14 318.494 31.4954  -2
  -9  -3   6 318.494 31.4954   1
  -8  -3   6 263.295 21.0629   1
  -7  -3   6 16.1953 7.07647   1
  -6  -3   6 11.3870 5.49376   1
  -5  -3   6 8.78061 3.85249   1
  -4  -3   6 80.1425 8.20169   1
   3   0   9 378.777 17.9308  -2
  -3  -3   6 378.777 17.9308   1
   2  -1   8 356.087 12.2729  -2
  -2  -3   6 356.087 12.2729   1
   1  -2   7 82.8824 12.7011  -2
  -1  -3   6 82.8824 12.7011   1
   0  -3   6 38.5745 12.8744  -2
   0  -3   6 38.5745 12.8744   1
  -1  -4   5 386.621 19.0273  -2
   1  -3   6 386.621 19.0273   1
  -2  -5   4 532.393 22.8139  -2
   2  -3   6 532.393 22.8139   1
  -3  -6   3 158.170 15.2841  -2
   3  -3   6 158.170 15.2841   1
  -4  -7   2 1672.07 47.8390  -2
   4  -3   6 1672.07 47.8390   1
  -5  -8   1 1465.41 44.5061  -2
   5  -3   6 1465.41 44.5061   1
   6   9   0 713.978 34.2132  -2
   6  -3   6 713.978 34.2132   1
   7  10   1 80.4067 26.8465  -2
   7  -3   6 80.4067 26.8465   1
   8  11   2 178.379 39.0812  -2
   8  -3   6 178.379 39.0812   1
   9  12   3 -38.194 115.270  -2
   9  -3   6 -38.194 115.270   1
  10  -3   6 19.5235 16.7791   1
  11  -3   6 -35.771 58.0178   1
  11   9  17 142.255 28.7052  -2
 -12  -2   6 142.255 28.7052   1
  10   8  16 60.9781 37.7633  -2
 -11  -2   6 60.9781 37.7633   1
   9   7  15 47.8962 26.3962  -2
 -10  -2   6 47.8962 26.3962   1
   8   6  14 76.4461 27.1916  -2
  -9  -2   6 76.4461 27.1916   1
   7   5  13 357.420 29.4828  -2
  -8  -2   6 357.420 29.4828   1
  -7  -2   6 313.833 16.6145   1
  -6  -2   6 71.9627 12.5306   1
  -5  -2   6 -0.6357 3.44078   1
  -4  -2   6 0.92355 2.74426   1
   3   1   9 -9.8617 31.9138  -2
  -3  -2   6 -9.8617 31.9138   1
   2   0   8 1450.03 29.7556  -2
  -2  -2   6 1450.03 29.7556   1
   1  -1   7 1577.05 37.8529  -2
  -1  -2   6 1577.05 37.8529   1
   0  -2   6 4910.31 111.004  -2
   0  -2   6 4910.31 111.004   1
  -1  -3   5 3256.47 71.1286  -2
   1  -2   6 3256.47 71.1286   1
  -2  -4   4 746.551 26.8069  -2
   2  -2   6 746.551 26.8069   1
  -3  -5   3 111.428 14.4526  -2
   3  -2   6 111.428 14.4526   1
  -4  -6   2 311.027 17.5512  -2
   4  -2   6 311.027 17.5512   1
  -5  -7   1 295.497 19.1946  -2
   5  -2   6 295.497 19.1946   1
   6   8   0 62.7672 18.9950  -2
   6  -2   6 62.7672 18.9950   1
   7   9   1 258.754 26.0329  -2
   7  -2   6 258.754 26.0329   1
   8  10   2 104.054 37.2305  -2
   8  -2   6 104.054 37.2305   1
   9  11   3 10.0684 116.348  -2
   9  -2   6 10.0684 116.348   1
  10  12   4 -116.17 120.475  -2
  10  -2   6 -116.17 120.475   1
  11  -2   6 -17.687 16.7372   1
  12  -2   6 -18.677 60.1912   1
  11  10  17 127.560 44.1990  -2
 -12  -1   6 127.560 44.1990   1
  10   9  16 55.7199 25.2119  -2
 -11  -1   6 55.7199 25.2119   1
   9   8  15 -17.154 20.7552  -2
 -10  -1   6 -17.154 20.7552   1
   8   7  14 23.9952 20.1691  -2
  -9  -1   6 23.9952 20.1691   1
   7   6  13 132.413 20.6640  -2
  -8  -1   6 132.413 20.6640   1
   6   5  12 95.5191 57.1868  -2
  -7  -1   6 95.5191 57.1868   1
  -6  -1   6 323.890 15.4062   1
  -5  -1   6 361.489 12.8230   1
  -4  -1   6 51.2744 6.43547   1
  -3  -1   6 200.039 7.10495   1
   2   1   8 1262.84 32.1955  -2
  -2  -1   6 1262.84 32.1955   1
   1   0   7 1240.73 33.7919  -2
  -1  -1   6 1240.73 33.7919   1
   0  -1   6 464.158 20.5933  -2
   0  -1   6 464.158 20.5933   1
  -1  -2   5 691.605 23.7777  -2
   1  -1   6 691.605 23.7777   1
  -2  -3   4 837.301 27.4826  -2
   2  -1   6 837.301 27.4826   1
  -3  -4   3 95.5913 14.1488  -2
   3  -1   6 95.5913 14.1488   1
  -4  -5   2 361.179 19.4447  -2
   4  -1   6 361.179 19.4447   1
  -5  -6   1 409.663 20.4409  -2
   5  -1   6 409.663 20.4409   1
   6   7   0 157.390 16.6647  -2
   6  -1   6 157.390 16.6647   1
   7   8   1 52.3048 19.4361  -2
   7  -1   6 52.3048 19.4361   1
   8   9   2 -11.622 101.968  -2
   8  -1   6 -11.622 101.968   1
   9  10   3 125.849 40.6306  -2
   9  -1   6 125.849 40.6306   1
  10  -1   6 53.4744 17.9200   1
  11  12   5 102.081 132.638  -2
  11  -1   6 102.081 132.638   1
  12  13   6 103.138 137.956  -2
  12  -1   6 103.138 137.956   1
  11  11  17 -10.396 38.5322  -2
 -12   0   6 -10.396 38.5322   1
  10  10  16 89.7929 28.0667  -2
 -11   0   6 89.7929 28.0667   1
   9   9  15 6.97376 30.8148  -2
 -10   0   6 6.97376 30.8148   1
   8   8  14 72.1517 20.6929  -2
  -9   0   6 72.1517 20.6929   1
   7   7  13 867.718 31.6526  -2
  -8   0   6 867.718 31.6526   1
   6   6  12 1386.95 49.1515  -2
  -7   0   6 1386.95 49.1515   1
  -6   0   6 12.5035 4.65278   1
  -5   0   6 254.044 12.9365   1
  -4   0   6 1096.41 17.8351   1
  -3   0   6 983.914 16.6824   1
  -2   0   6 59.4898 4.77294   1
   1   1   7 1059.64 43.9520  -2
  -1   0   6 1059.64 43.9520   1
   0   0   6 1827.52 47.4154  -2
   0   0   6 1827.52 47.4154   1
  -1  -1   5 117.028 14.2292  -2
   1   0   6 117.028 14.2292   1
  -2  -2   4 705.299 19.8811  -2
   2   0   6 705.299 19.8811   1
  -3  -3   3 145.062 11.8634  -2
   3   0   6 145.062 11.8634   1
  -4  -4   2 967.506 30.5790  -2
   4   0   6 967.506 30.5790   1
  -5  -5   1 133.405 14.2317  -2
   5   0   6 133.405 14.2317   1
   6   6   0 407.282 15.8476  -2
   6   0   6 407.282 15.8476   1
   7   7   1 373.046 16.5206  -2
   7   0   6 373.046 16.5206   1
   8   8   2 57.1936 19.3190  -2
   8   0   6 57.1936 19.3190   1
   9   9   3 1048.16 41.6667  -2
   9   0   6 1048.16 41.6667   1
  10  10   4 156.369 117.834  -2
  10   0   6 156.369 117.834   1
  11   0   6 -5.9027 15.3296   1
  12   0   6 32.5371 18.0039   1
  13   0   6 4.54073 16.4819   1
  10  11  16 13.2341 32.7397  -2
 -11   1   6 13.2341 32.7397   1
   9  10  15 183.574 28.8152  -2
 -10   1   6 183.574 28.8152   1
   8   9  14 518.559 32.8782  -2
  -9   1   6 518.559 32.8782   1
   7   8  13 430.296 25.2645  -2
  -8   1   6 430.296 25.2645   1
   6   7  12 718.034 29.2911  -2
  -7   1   6 718.034 29.2911   1
  -6   1   6 25.7477 5.47383   1
  -5   1   6 5.27911 3.92251   1
  -4   1   6 398.818 10.7532   1
  -3   1   6 624.612 12.8551   1
  -2   1   6 252.269 7.59188   1
  -1   1   6 652.155 15.3737   1
   0   1   6 478.382 27.3303  -2
   0   1   6 478.382 27.3303   1
  -1   0   5 427.661 27.4977  -2
   1   1   6 427.661 27.4977   1
  -2  -1   4 1349.15 36.8490  -2
   2   1   6 1349.15 36.8490   1
  -3  -2   3 356.590 14.7217  -2
   3   1   6 356.590 14.7217   1
  -4  -3   2 4233.19 79.5787  -2
   4   1   6 4233.19 79.5787   1
  -5  -4   1 4948.81 92.4810  -2
   5   1   6 4948.81 92.4810   1
   6   5   0 678.535 26.1563  -2
   6   1   6 678.535 26.1563   1
   7   6   1 8.07302 9.79838  -2
   7   1   6 8.07302 9.79838   1
   8   7   2 144.348 17.6510  -2
   8   1   6 144.348 17.6510   1
   9   8   3 92.4283 21.9105  -2
   9   1   6 92.4283 21.9105   1
  10   9   4 177.615 34.0732  -2
  10   1   6 177.615 34.0732   1
  11  10   5 110.855 118.154  -2
  11   1   6 110.855 118.154   1
  12  11   6 131.998 124.343  -2
  12   1   6 131.998 124.343   1
  13   1   6 5.08613 16.6132   1
   9  11  15 115.764 34.3618  -2
 -10   2   6 115.764 34.3618   1
   8  10  14 222.288 28.3939  -2
  -9   2   6 222.288 28.3939   1
   7   9  13 18.0633 25.9390  -2
  -8   2   6 18.0633 25.9390   1
   6   8  12 34.2527 18.3169  -2
  -7   2   6 34.2527 18.3169   1
  -6   2   6 -4.6767 4.86200   1
  -5   2   6 50.9123 11.6800   1
  -4   2   6 256.799 12.4362   1
  -3   2   6 91.4999 10.2759   1
  -2   2   6 199.152 11.6376   1
  -1   2   6 1023.51 21.3056   1
   0   2   6 2444.88 46.9285   1
  -2   0   4 1374.92 53.4784  -2
   2   2   6 1374.92 53.4784   1
  -3  -1   3 1299.73 28.8672  -2
   3   2   6 1299.73 28.8672   1
  -4  -2   2 1125.85 26.5504  -2
   4   2   6 1125.85 26.5504   1
  -5  -3   1 522.016 15.8359  -2
   5   2   6 522.016 15.8359   1
   6   4   0 974.403 22.1913  -2
   6   2   6 974.403 22.1913   1
   7   5   1 94.4976 15.5819  -2
   7   2   6 94.4976 15.5819   1
   8   6   2 5.05372 10.9093  -2
   8   2   6 5.05372 10.9093   1
   9   7   3 65.4713 18.6377  -2
   9   2   6 65.4713 18.6377   1
  10   8   4 360.505 37.9979  -2
  10   2   6 360.505 37.9979   1
  11   9   5 70.1338 38.1403  -2
  11   2   6 70.1338 38.1403   1
  12  10   6 116.117 114.287  -2
  12   2   6 116.117 114.287   1
  13   2   6 25.4714 17.8660   1
   8  11  14 114.687 36.7593  -2
  -9   3   6 114.687 36.7593   1
   7  10  13 72.6240 26.5583  -2
  -8   3   6 72.6240 26.5583   1
   6   9  12 29.7301 24.8706  -2
  -7   3   6 29.7301 24.8706   1
   5   8  11 -9.6334 28.0283  -2
  -6   3   6 -9.6334 28.0283   1
  -5   3   6 18.6199 4.94414   1
  -4   3   6 432.520 20.7721   1
  -3   3   6 2553.78 65.6239   1
  -2   3   6 2613.73 58.5056   1
   0   3   6 161.436 11.7223   1
   1   3   6 1486.75 30.6407   1
   2   3   6 461.364 13.5086   1
   3   3   6 31.7508 5.48322   1
  -4  -1   2 1237.58 84.9080  -2
   4   3   6 1237.58 84.9080   1
  -5  -2   1 2059.03 37.2129  -2
   5   3   6 2059.03 37.2129   1
   6   3   0 909.613 22.4183  -2
   6   3   6 909.613 22.4183   1
   7   4   1 -1.4449 16.0801  -2
   7   3   6 -1.4449 16.0801   1
   8   5   2 98.6781 9.96604  -2
   8   3   6 98.6781 9.96604   1
   9   6   3 43.1686 18.1671  -2
   9   3   6 43.1686 18.1671   1
  10   7   4 208.254 33.6204  -2
  10   3   6 208.254 33.6204   1
  12   3   6 48.6182 17.6555   1
  13  10   6 4.84772 40.9507  -2
  13   3   6 4.84772 40.9507   1
  14   3   6 16.4384 18.5773   1
   7  11  13 317.085 46.3560  -2
  -8   4   6 317.085 46.3560   1
   6  10  12 517.492 34.2997  -2
  -7   4   6 517.492 34.2997   1
   5   9  11 298.069 30.0849  -2
  -6   4   6 298.069 30.0849   1
  -5   4   6 42.5213 6.61548   1
  -4   4   6 922.504 31.4387   1
  -3   4   6 807.705 27.2175   1
  -1   4   6 190.917 14.5356   1
   0   4   6 21.0739 4.72146   1
   1   4   6 818.110 26.2061   1
   2   4   6 3.64989 2.80573   1
   3   4   6 15.6478 3.80506   1
   4   4   6 142.804 10.4699   1
  -5  -1   1 118.487 49.3705  -2
   5   4   6 118.487 49.3705   1
   6   2   0 786.515 79.1845  -2
   6   4   6 786.515 79.1845   1
   7   3   1 522.605 15.7242  -2
   7   4   6 522.605 15.7242   1
   8   4   2 429.154 15.2479  -2
   8   4   6 429.154 15.2479   1
   9   5   3 1380.62 65.6348  -2
   9   4   6 1380.62 65.6348   1
  10   6   4 612.272 33.4415  -2
  10   4   6 612.272 33.4415   1
  13   9   6 13.4080 39.7671  -2
  13   4   6 13.4080 39.7671   1
  14  10   7 60.2459 45.5126  -2
  14   4   6 60.2459 45.5126   1
   6  11  12 204.141 30.1594  -2
  -7   5   6 204.141 30.1594   1
   5  10  11 275.584 39.6904  -2
  -6   5   6 275.584 39.6904   1
   4   9  10 86.6288 86.4961  -2
  -5   5   6 86.6288 86.4961   1
  -4   5   6 7.21598 6.09240   1
  -3   5   6 251.720 19.0141   1
  -2   5   6 298.562 17.2597   1
  -1   5   6 58.7593 12.1447   1
   0   5   6 259.982 16.1590   1
   1   5   6 1355.90 39.4104   1
   2   5   6 504.787 20.8828   1
   3   5   6 10.1894 3.75340   1
   4   5   6 269.363 13.1794   1
   5   5   6 349.704 15.4885   1
   6   1   0 144.351 46.0153  -2
   6   5   6 144.351 46.0153   1
   7   2   1 94.2071 22.1925  -2
   7   5   6 94.2071 22.1925   1
   8   3   2 61.5571 23.2043  -2
   8   5   6 61.5571 23.2043   1
   9   4   3 18.8364 22.2362  -2
   9   5   6 18.8364 22.2362   1
  10   5   4 105.028 34.9514  -2
  10   5   6 105.028 34.9514   1
  13   8   6 4.28671 41.9847  -2
  13   5   6 4.28671 41.9847   1
  14   9   7 100.127 46.8804  -2
  14   5   6 100.127 46.8804   1
   6  12  12 121.394 106.481  -2
  -7   6   6 121.394 106.481   1
   5  11  11 -47.181 34.6140  -2
  -6   6   6 -47.181 34.6140   1
  -5   6   6 4.40397 7.09359   1
  -4   6   6 181.582 19.7677   1
  -3   6   6 116.576 17.3768   1
  -2   6   6 125.869 50.5526   1
  -1   6   6 247.988 18.3335   1
   0   6   6 -0.6336 4.23621   1
   1   6   6 546.335 23.2822   1
   2   6   6 1642.37 46.7894   1
   3   6   6 1725.25 48.5583   1
   4   6   6 -0.1757 4.47515   1
   5   6   6 2.82122 5.11109   1
   6   6   6 30.0144 6.07712   1
   7   1   1 166.318 40.0999  -2
   7   6   6 166.318 40.0999   1
   8   2   2 329.504 28.0661  -2
   8   6   6 329.504 28.0661   1
   9   3   3 685.528 34.3945  -2
   9   6   6 685.528 34.3945   1
  10   4   4 976.207 63.1696  -2
  10   6   6 976.207 63.1696   1
  14   8   7 128.715 50.2919  -2
  14   6   6 128.715 50.2919   1
   6  13  12 24.6178 79.3560  -2
  -7   7   6 24.6178 79.3560   1
   4  11  10 -62.423 104.350  -2
  -5   7   6 -62.423 104.350   1
  -4   7   6 3.24185 6.90133   1
  -3   7   6 612.102 30.4268   1
   1   8   7 418.978 99.3105  -2
  -2   7   6 418.978 99.3105   1
  -1   7   6 73.3273 9.58028   1
   0   7   6 102.259 14.7977   1
   1   7   6 490.694 23.1500   1
   2   7   6 4.44989 5.10051   1
   3   7   6 225.707 17.4755   1
   4   7   6 133.410 12.4020   1
   5   7   6 123.790 12.6650   1
   6   7   6 98.6084 13.4025   1
   7   7   6 -1.1211 8.35174   1
   8   1   2 675.415 64.7806  -2
   8   7   6 675.415 64.7806   1
   9   2   3 108.897 32.4858  -2
   9   7   6 108.897 32.4858   1
  10   3   4 167.893 29.7711  -2
  10   7   6 167.893 29.7711   1
  11   4   5 112.606 45.9184  -2
  11   7   6 112.606 45.9184   1
   4  12  10 -49.876 108.218  -2
  -5   8   6 -49.876 108.218   1
   3  11   9 -24.015 111.277  -2
  -4   8   6 -24.015 111.277   1
   2  10   8 -32.885 102.922  -2
  -3   8   6 -32.885 102.922   1
  -2   8   6 15.1516 7.69863   1
  -1   8   6 0.29231 5.93800   1
   0   8   6 9.83862 5.87117   1
   1   8   6 114.529 16.1790   1
   2   8   6 80.6128 15.2101   1
   3   8   6 495.093 24.7862   1
   4   8   6 -4.2089 5.79105   1
   5   8   6 318.895 16.9755   1
   6   8   6 631.692 23.4337   1
   7   8   6 130.167 15.3572   1
   8   8   6 8.60268 6.37681   1
   9   8   6 186.894 21.6068   1
  10   2   4 74.0395 30.9420  -2
  10   8   6 74.0395 30.9420   1
  11   3   5 49.9573 38.4061  -2
  11   8   6 49.9573 38.4061   1
   3  13  10 109.803 40.3171  -2
  -5   9   6 109.803 40.3171   1
   4  13  10 78.5874 50.9167  -2
  -5   9   6 78.5874 50.9167   1
   2  12   9 77.8957 34.3231  -2
  -4   9   6 77.8957 34.3231   1
  -3   9   6 153.417 23.0630   1
  -2   9   6 273.384 25.2422   1
  -1   9   6 186.589 21.4024   1
   0   9   6 96.8971 18.0204   1
   1   9   6 309.929 22.2767   1
   2   9   6 269.571 21.3058   1
   3   9   6 100.328 17.1946   1
   4   9   6 85.7118 16.9638   1
   5   9   6 19.8738 6.65972   1
   6   9   6 323.749 18.9554   1
   7   9   6 365.067 20.3424   1
   8   9   6 403.399 19.7325   1
   9   0   3 -33.121 50.1149  -2
   9   9   6 -33.121 50.1149   1
  10   9   6 -12.032 11.8587   1
  11   2   5 217.637 65.7833  -2
  11   9   6 217.637 65.7833   1
  12   3   6 90.0816 64.3066  -2
  12   9   6 90.0816 64.3066   1
   4  15  11 -21.569 43.9807  -2
  -6  10   6 -21.569 43.9807   1
   3  14  10 154.096 44.7279  -2
  -5  10   6 154.096 44.7279   1
   3  13   9 247.477 61.7238  -2
  -4  10   6 247.477 61.7238   1
   2  13   9 327.571 45.8636  -2
  -4  10   6 327.571 45.8636   1
  -3  10   6 37.5256 10.1241   1
  -2  10   6 103.491 17.4141   1
  -1  10   6 365.238 27.8129   1
   0  10   6 303.194 25.0987   1
   1  10   6 35.9096 8.84695   1
   2  10   6 239.534 22.3442   1
   3  10   6 173.943 21.4151   1
   4  10   6 105.531 19.9728   1
   5  10   6 -2.5537 5.96227   1
   6  10   6 -3.1095 6.58357   1
   7  10   6 -10.508 7.24139   1
   8  10   6 3.66952 15.4790   1
   9  10   6 199.039 28.4887   1
  10  10   6 32.6583 13.7499   1
  14  10   6 0.71137 20.2994   1
   3  15  10 244.290 50.4409  -2
  -5  11   6 244.290 50.4409   1
   3  14   9 270.086 63.4528  -2
  -4  11   6 270.086 63.4528   1
   2  14   9 -10.705 40.5910  -2
  -4  11   6 -10.705 40.5910   1
   2  13   8 170.216 58.8878  -2
  -3  11   6 170.216 58.8878   1
   1  13   8 223.803 42.5328  -2
  -3  11   6 223.803 42.5328   1
   0  12   7 43.9454 35.1049  -2
  -2  11   6 43.9454 35.1049   1
  -1  11   6 -4.9279 8.36737   1
   0  11   6 196.808 24.7204   1
   1  11   6 75.0606 15.1686   1
   2  11   6 4.66561 7.80116   1
   3  11   6 -2.0398 9.47689   1
  -6   6   1 19.2238 39.3704  -2
   5  11   6 19.2238 39.3704   1
  -7   5   0 -20.305 40.3703  -2
   6  11   6 -20.305 40.3703   1
   7  11   6 335.413 22.3132   1
   8  11   6 265.634 22.5500   1
   9  11   6 6.57928 12.5601   1
  10  11   6 -8.0142 13.0153   1
  11  11   6 23.3733 23.0253   1
   2  15   9 -8.4472 43.9143  -2
  -4  12   6 -8.4472 43.9143   1
   1  14   8 -38.603 39.8589  -2
  -3  12   6 -38.603 39.8589   1
   0  13   7 -15.949 40.0018  -2
  -2  12   6 -15.949 40.0018   1
  -1  12   6 -0.0155 36.5597  -2
  -1  12   6 -0.0155 36.5597   1
  -2  11   5 -34.002 34.8242  -2
   0  12   6 -34.002 34.8242   1
   1  12   6 30.1061 9.86331   1
   2  12   6 300.200 27.4468   1
  -4   9   3 563.997 64.6157  -2
   3  12   6 563.997 64.6157   1
  -5   8   2 4.78376 32.3266  -2
   4  12   6 4.78376 32.3266   1
  -6   7   1 229.865 35.7637  -2
   5  12   6 229.865 35.7637   1
  -7   6   0 399.702 52.4948  -2
   6  12   6 399.702 52.4948   1
   8  -5   1 105.941 36.7572  -2
   7  12   6 105.941 36.7572   1
   9  -4   2 -29.376 43.5490  -2
   8  12   6 -29.376 43.5490   1
   9  12   6 30.5325 18.3981   1
  10  12   6 -21.327 19.8164   1
  11  12   6 -17.362 22.2854   1
   1  15   8 4.61689 44.3055  -2
  -3  13   6 4.61689 44.3055   1
   0  14   7 131.705 45.2563  -2
  -2  13   6 131.705 45.2563   1
  -1  13   6 -2.0205 38.4961  -2
  -1  13   6 -2.0205 38.4961   1
  -1  12   5 153.864 61.1524  -2
   0  13   6 153.864 61.1524   1
  -2  12   5 119.468 43.7150  -2
   0  13   6 119.468 43.7150   1
   1  13   6 144.817 40.5152   1
   2  13   6 6.76727 18.0845   1
  -4  10   3 38.0395 33.9774  -2
   3  13   6 38.0395 33.9774   1
  -5   9   2 328.964 39.2153  -2
   4  13   6 328.964 39.2153   1
  -6   8   1 257.837 38.0140  -2
   5  13   6 257.837 38.0140   1
  -7   7   0 38.4077 47.0962  -2
   6  13   6 38.4077 47.0962   1
   8  -6   1 34.2877 46.0418  -2
   7  13   6 34.2877 46.0418   1
   9  -5   2 -3.2504 45.3960  -2
   8  13   6 -3.2504 45.3960   1
   9  13   6 -1.9941 17.8296   1
  10  13   6 0.14910 18.8659   1
  11  13   6 -3.2984 20.9041   1
  12  13   6 15.7292 22.6812   1
  -1  14   6 430.925 54.8736  -2
  -1  14   6 430.925 54.8736   1
   0  14   6 180.817 44.9434   1
   1  14   6 29.4968 21.3172   1
   2  14   6 -3.1492 17.6533   1
  -4  11   3 56.1567 59.6547  -2
   3  14   6 56.1567 59.6547   1
  -5  10   2 61.8590 36.3040  -2
   4  14   6 61.8590 36.3040   1
  -6   9   1 94.8158 37.0221  -2
   5  14   6 94.8158 37.0221   1
  -7   8   0 151.563 38.9130  -2
   6  14   6 151.563 38.9130   1
   8  -7   1 320.451 55.8479  -2
   7  14   6 320.451 55.8479   1
   9  -6   2 -5.9511 47.3523  -2
   8  14   6 -5.9511 47.3523   1
  11  14   6 -3.2851 16.4294   1
   2  15   6 6.36695 19.9715   1
  -4  12   3 82.1309 66.7126  -2
   3  15   6 82.1309 66.7126   1
  -5  11   2 34.2465 37.5419  -2
   4  15   6 34.2465 37.5419   1
  -6  10   1 48.0726 37.8586  -2
   5  15   6 48.0726 37.8586   1
  -7   9   0 49.5306 38.2848  -2
   6  15   6 49.5306 38.2848   1
   8  -8   1 370.455 44.7196  -2
   7  15   6 370.455 44.7196   1
   9  -7   2 209.833 42.0867  -2
   8  15   6 209.833 42.0867   1
   5  -7  12 120.714 19.0059  -2
  -5 -12   7 120.714 19.0059   1
   4  -8  11 97.9017 18.9679  -2
  -4 -12   7 97.9017 18.9679   1
   3  -9  10 70.7707 19.8585  -2
  -3 -12   7 70.7707 19.8585   1
   2 -10   9 25.6353 46.4944  -2
  -2 -12   7 25.6353 46.4944   1
   1 -11   8 27.0080 50.6085  -2
  -1 -12   7 27.0080 50.6085   1
  -8 -11   7 2.46527 14.7356   1
   7  -4  14 91.5167 34.4411  -2
  -7 -11   7 91.5167 34.4411   1
   6  -5  13 29.9784 35.3225  -2
  -6 -11   7 29.9784 35.3225   1
   5  -6  12 41.6996 19.6052  -2
  -5 -11   7 41.6996 19.6052   1
   4  -7  11 90.0809 16.6826  -2
  -4 -11   7 90.0809 16.6826   1
   3  -8  10 86.1119 17.4312  -2
  -3 -11   7 86.1119 17.4312   1
   2  -9   9 64.0263 17.5337  -2
  -2 -11   7 64.0263 17.5337   1
   1 -10   8 128.300 47.2169  -2
  -1 -11   7 128.300 47.2169   1
   0 -11   7 58.8968 49.8952  -2
   0 -11   7 58.8968 49.8952   1
  -1 -12   6 -23.285 52.2248  -2
   1 -11   7 -23.285 52.2248   1
  -2 -13   5 -26.601 57.1249  -2
   2 -11   7 -26.601 57.1249   1
  -9 -10   7 0.88910 17.5762   1
   8  -2  15 -57.564 44.0998  -2
  -8 -10   7 -57.564 44.0998   1
   7  -3  14 -21.557 39.7744  -2
  -7 -10   7 -21.557 39.7744   1
   6  -4  13 329.142 27.8797  -2
  -6 -10   7 329.142 27.8797   1
   5  -5  12 313.226 23.5931  -2
  -5 -10   7 313.226 23.5931   1
   4  -6  11 112.726 18.7624  -2
  -4 -10   7 112.726 18.7624   1
   3  -7  10 237.176 18.7038  -2
  -3 -10   7 237.176 18.7038   1
   2  -8   9 248.681 19.2148  -2
  -2 -10   7 248.681 19.2148   1
   1  -9   8 45.6549 16.8879  -2
  -1 -10   7 45.6549 16.8879   1
   0 -10   7 34.7212 17.8043  -2
   0 -10   7 34.7212 17.8043   1
  -1 -11   6 -12.317 45.9994  -2
   1 -10   7 -12.317 45.9994   1
  -2 -12   5 -43.758 54.2285  -2
   2 -10   7 -43.758 54.2285   1
  -3 -13   4 -23.108 59.8623  -2
   3 -10   7 -23.108 59.8623   1
   4 -10   7 -21.657 20.5730   1
   9   0  16 131.855 55.6324  -2
 -10  -9   7 131.855 55.6324   1
  10   1  16 157.009 78.7881  -2
 -10  -9   7 157.009 78.7881   1
   9   0  16 43.7784 146.344  -2
  -9  -9   7 43.7784 146.344   1
   8  -1  15 62.2103 45.0660  -2
  -8  -9   7 62.2103 45.0660   1
   7  -2  14 132.978 35.9850  -2
  -7  -9   7 132.978 35.9850   1
   6  -3  13 27.7389 23.0812  -2
  -6  -9   7 27.7389 23.0812   1
   5  -4  12 71.5684 17.0846  -2
  -5  -9   7 71.5684 17.0846   1
   4  -5  11 -6.5116 16.2593  -2
  -4  -9   7 -6.5116 16.2593   1
   3  -6  10 -17.631 15.1833  -2
  -3  -9   7 -17.631 15.1833   1
   2  -7   9 110.573 16.1320  -2
  -2  -9   7 110.573 16.1320   1
   1  -8   8 112.279 16.1539  -2
  -1  -9   7 112.279 16.1539   1
   0  -9   7 41.2115 17.0590  -2
   0  -9   7 41.2115 17.0590   1
  -1 -10   6 -9.4724 21.3979  -2
   1  -9   7 -9.4724 21.3979   1
  -2 -11   5 59.9922 27.0455  -2
   2  -9   7 59.9922 27.0455   1
  -4 -13   3 -9.0247 129.686  -2
   4  -9   7 -9.0247 129.686   1
   5  -9   7 78.2257 27.3291   1
   9   1  16 101.102 43.8079  -2
 -10  -8   7 101.102 43.8079   1
   9   1  15 -85.168 130.170  -2
  -9  -8   7 -85.168 130.170   1
  -8  -8   7 14.8435 9.19429   1
   7  -1  14 93.3631 33.1845  -2
  -7  -8   7 93.3631 33.1845   1
   6  -2  13 1.81977 19.6466  -2
  -6  -8   7 1.81977 19.6466   1
   5  -3  12 108.764 16.9326  -2
  -5  -8   7 108.764 16.9326   1
   4  -4  11 176.122 18.7223  -2
  -4  -8   7 176.122 18.7223   1
   3  -5  10 87.9308 16.3987  -2
  -3  -8   7 87.9308 16.3987   1
   2  -6   9 76.5676 14.3140  -2
  -2  -8   7 76.5676 14.3140   1
   1  -7   8 417.049 20.6458  -2
  -1  -8   7 417.049 20.6458   1
   0  -8   7 241.967 18.2891  -2
   0  -8   7 241.967 18.2891   1
  -1  -9   6 281.046 25.5656  -2
   1  -8   7 281.046 25.5656   1
  -2 -10   5 302.526 27.3099  -2
   2  -8   7 302.526 27.3099   1
  -3 -11   4 232.906 29.6732  -2
   3  -8   7 232.906 29.6732   1
  -4 -12   3 63.9685 51.0443  -2
   4  -8   7 63.9685 51.0443   1
  -5 -13   2 -64.712 50.9864  -2
   5  -8   7 -64.712 50.9864   1
   6  -8   7 5.41360 20.2098   1
  -6 -14   1 48.2254 62.7556  -2
   7  -8   7 48.2254 62.7556   1
  10   3  17 -43.029 63.5065  -2
 -11  -7   7 -43.029 63.5065   1
   9   2  16 -3.7270 44.3725  -2
 -10  -7   7 -3.7270 44.3725   1
   9   2  15 78.8209 137.759  -2
  -9  -7   7 78.8209 137.759   1
   8   1  15 252.736 46.2773  -2
  -9  -7   7 252.736 46.2773   1
  -8  -7   7 -3.0512 11.9401   1
   7   0  14 -13.456 116.575  -2
  -7  -7   7 -13.456 116.575   1
   6  -1  13 -22.617 21.2659  -2
  -6  -7   7 -22.617 21.2659   1
   5  -2  12 87.9198 15.1263  -2
  -5  -7   7 87.9198 15.1263   1
   4  -3  11 22.4999 15.4169  -2
  -4  -7   7 22.4999 15.4169   1
   3  -4  10 82.0070 15.8891  -2
  -3  -7   7 82.0070 15.8891   1
   2  -5   9 689.069 24.8295  -2
  -2  -7   7 689.069 24.8295   1
   1  -6   8 675.013 24.2731  -2
  -1  -7   7 675.013 24.2731   1
   0  -7   7 825.915 34.1542  -2
   0  -7   7 825.915 34.1542   1
  -1  -8   6 490.978 27.7687  -2
   1  -7   7 490.978 27.7687   1
  -2  -9   5 161.648 22.8315  -2
   2  -7   7 161.648 22.8315   1
  -3 -10   4 11.9593 23.1033  -2
   3  -7   7 11.9593 23.1033   1
  -4 -11   3 -29.375 26.3337  -2
   4  -7   7 -29.375 26.3337   1
  -5 -12   2 5.05845 46.2543  -2
   5  -7   7 5.05845 46.2543   1
  -6 -13   1 -87.164 48.1970  -2
   6  -7   7 -87.164 48.1970   1
   7  -7   7 -14.980 18.2074   1
  10   4  17 -42.345 41.8045  -2
 -11  -6   7 -42.345 41.8045   1
   9   3  16 4.86743 44.2230  -2
 -10  -6   7 4.86743 44.2230   1
   8   2  15 120.903 35.2197  -2
  -9  -6   7 120.903 35.2197   1
  -8  -6   7 13.0486 12.5325   1
  -7  -6   7 201.709 16.1279   1
   6   0  13 653.574 40.4588  -2
  -6  -6   7 653.574 40.4588   1
   5  -1  12 1099.03 31.1467  -2
  -5  -6   7 1099.03 31.1467   1
   4  -2  11 1294.24 32.8140  -2
  -4  -6   7 1294.24 32.8140   1
   3  -3  10 693.518 19.9026  -2
  -3  -6   7 693.518 19.9026   1
   2  -4   9 551.151 21.1717  -2
  -2  -6   7 551.151 21.1717   1
   1  -5   8 163.654 15.4080  -2
  -1  -6   7 163.654 15.4080   1
   0  -6   7 2.54426 9.67987  -2
   0  -6   7 2.54426 9.67987   1
  -1  -7   6 12.8133 10.7664  -2
   1  -6   7 12.8133 10.7664   1
  -2  -8   5 -4.9726 15.8861  -2
   2  -6   7 -4.9726 15.8861   1
  -3  -9   4 178.926 24.3917  -2
   3  -6   7 178.926 24.3917   1
  -4 -10   3 -45.050 24.3792  -2
   4  -6   7 -45.050 24.3792   1
  -5 -11   2 -73.463 109.464  -2
   5  -6   7 -73.463 109.464   1
  -6 -12   1 -56.063 28.9542  -2
   6  -6   7 -56.063 28.9542   1
   7  13   0 -114.33 121.848  -2
   7  -6   7 -114.33 121.848   1
   8  14   1 -95.397 133.824  -2
   8  -6   7 -95.397 133.824   1
   9  -6   7 8.43029 66.6526   1
   9   4  16 34.8624 69.7079  -2
 -10  -5   7 34.8624 69.7079   1
   8   3  15 97.7737 36.6845  -2
  -9  -5   7 97.7737 36.6845   1
  -8  -5   7 279.479 29.3779   1
  -7  -5   7 396.516 23.1173   1
  -6  -5   7 27.9250 5.79382   1
   5   0  12 360.231 60.1498  -2
  -5  -5   7 360.231 60.1498   1
   4  -1  11 144.624 15.3523  -2
  -4  -5   7 144.624 15.3523   1
   3  -2  10 143.758 12.8553  -2
  -3  -5   7 143.758 12.8553   1
   2  -3   9 15.8647 9.72306  -2
  -2  -5   7 15.8647 9.72306   1
   1  -4   8 0.83832 11.3318  -2
  -1  -5   7 0.83832 11.3318   1
   0  -5   7 61.1324 15.3687  -2
   0  -5   7 61.1324 15.3687   1
  -1  -6   6 33.5054 14.3747  -2
   1  -5   7 33.5054 14.3747   1
  -2  -7   5 46.0243 16.2963  -2
   2  -5   7 46.0243 16.2963   1
  -3  -8   4 411.140 24.8964  -2
   3  -5   7 411.140 24.8964   1
  -4  -9   3 162.310 22.3965  -2
   4  -5   7 162.310 22.3965   1
  -5 -10   2 119.639 27.9474  -2
   5  -5   7 119.639 27.9474   1
   7  12   0 75.0199 31.3567  -2
   7  -5   7 75.0199 31.3567   1
   8  13   1 -67.614 120.307  -2
   8  -5   7 -67.614 120.307   1
   9  14   2 -77.491 128.443  -2
   9  -5   7 -77.491 128.443   1
  10  -5   7 -41.479 63.0340   1
  11   7  18 53.0511 37.2863  -2
 -12  -4   7 53.0511 37.2863   1
  10   6  17 53.0949 48.5423  -2
 -11  -4   7 53.0949 48.5423   1
   9   5  16 125.440 41.0732  -2
 -10  -4   7 125.440 41.0732   1
   8   4  15 210.848 38.9223  -2
  -9  -4   7 210.848 38.9223   1
   7   3  14 564.011 44.0025  -2
  -8  -4   7 564.011 44.0025   1
  -7  -4   7 42.2732 8.61932   1
  -6  -4   7 51.0305 7.62007   1
   5   1  12 -86.095 104.644  -2
  -5  -4   7 -86.095 104.644   1
   4   0  11 408.135 20.6286  -2
  -4  -4   7 408.135 20.6286   1
   3  -1  10 253.137 15.0677  -2
  -3  -4   7 253.137 15.0677   1
   2  -2   9 220.493 11.9294  -2
  -2  -4   7 220.493 11.9294   1
   1  -3   8 266.431 17.7461  -2
  -1  -4   7 266.431 17.7461   1
   0  -4   7 192.438 16.5534  -2
   0  -4   7 192.438 16.5534   1
  -1  -5   6 500.340 23.6888  -2
   1  -4   7 500.340 23.6888   1
  -2  -6   5 740.954 29.6814  -2
   2  -4   7 740.954 29.6814   1
  -4  -8   3 1561.81 48.9459  -2
   4  -4   7 1561.81 48.9459   1
  -5  -9   2 1071.34 40.0435  -2
   5  -4   7 1071.34 40.0435   1
   7  11   0 30.5442 27.9314  -2
   7  -4   7 30.5442 27.9314   1
   8  12   1 -7.6083 39.2432  -2
   8  -4   7 -7.6083 39.2432   1
   9  13   2 31.5523 125.191  -2
   9  -4   7 31.5523 125.191   1
  11   8  18 84.0347 38.5244  -2
 -12  -3   7 84.0347 38.5244   1
  10   7  17 103.733 30.5107  -2
 -11  -3   7 103.733 30.5107   1
   9   6  16 124.552 41.3146  -2
 -10  -3   7 124.552 41.3146   1
   8   5  15 19.0282 28.1474  -2
  -9  -3   7 19.0282 28.1474   1
   7   4  14 114.907 26.4750  -2
  -8  -3   7 114.907 26.4750   1
  -7  -3   7 75.2803 16.0636   1
  -6  -3   7 2.99559 5.32896   1
  -5  -3   7 198.241 10.5797   1
   4   1  11 63.7464 91.4767  -2
  -4  -3   7 63.7464 91.4767   1
   3   0  10 57.8262 11.0702  -2
  -3  -3   7 57.8262 11.0702   1
   2  -1   9 722.565 20.4342  -2
  -2  -3   7 722.565 20.4342   1
   1  -2   8 1996.32 47.8552  -2
  -1  -3   7 1996.32 47.8552   1
   0  -3   7 3149.64 77.1860  -2
   0  -3   7 3149.64 77.1860   1
  -1  -4   6 1878.59 50.9782  -2
   1  -3   7 1878.59 50.9782   1
  -2  -5   5 999.062 33.5124  -2
   2  -3   7 999.062 33.5124   1
  -3  -6   4 -11.856 13.5403  -2
   3  -3   7 -11.856 13.5403   1
  -4  -7   3 83.6246 16.3667  -2
   4  -3   7 83.6246 16.3667   1
  -5  -8   2 54.6511 16.8116  -2
   5  -3   7 54.6511 16.8116   1
  -6  -9   1 244.905 26.1419  -2
   6  -3   7 244.905 26.1419   1
   7  10   0 44.1629 25.9983  -2
   7  -3   7 44.1629 25.9983   1
   8  11   1 -17.211 36.0008  -2
   8  -3   7 -17.211 36.0008   1
   9  12   2 -17.723 40.5290  -2
   9  -3   7 -17.723 40.5290   1
  10  13   3 -63.660 128.875  -2
  10  -3   7 -63.660 128.875   1
  10   8  17 61.0715 25.4340  -2
 -11  -2   7 61.0715 25.4340   1
   9   7  16 48.2460 27.0357  -2
 -10  -2   7 48.2460 27.0357   1
   8   6  15 215.045 29.5193  -2
  -9  -2   7 215.045 29.5193   1
   7   5  14 193.951 22.2987  -2
  -8  -2   7 193.951 22.2987   1
   6   4  13 32.7344 30.3641  -2
  -7  -2   7 32.7344 30.3641   1
  -6  -2   7 130.690 11.0433   1
  -5  -2   7 96.5466 9.61608   1
  -4  -2   7 265.699 8.95898   1
  -3  -2   7 739.237 14.6062   1
  -2  -2   7 376.359 17.5484   1
   1  -1   8 424.783 18.2798  -2
  -1  -2   7 424.783 18.2798   1
   0  -2   7 13.7224 12.2184  -2
   0  -2   7 13.7224 12.2184   1
  -1  -3   6 93.2905 15.0869  -2
   1  -2   7 93.2905 15.0869   1
  -2  -4   5 43.4055 13.6661  -2
   2  -2   7 43.4055 13.6661   1
  -3  -5   4 205.623 16.8443  -2
   3  -2   7 205.623 16.8443   1
  -4  -6   3 672.426 27.2174  -2
   4  -2   7 672.426 27.2174   1
  -5  -7   2 783.527 29.6366  -2
   5  -2   7 783.527 29.6366   1
  -6  -8   1 631.772 34.8515  -2
   6  -2   7 631.772 34.8515   1
   7   9   0 44.5462 22.6233  -2
   7  -2   7 44.5462 22.6233   1
   8  10   1 145.267 118.300  -2
   8  -2   7 145.267 118.300   1
   9  11   2 -26.586 37.2774  -2
   9  -2   7 -26.586 37.2774   1
  10  12   3 -117.02 123.249  -2
  10  -2   7 -117.02 123.249   1
  11  -2   7 169.143 36.9248   1
  12  -2   7 1.92198 59.5146   1
  10   9  17 86.2837 44.4293  -2
 -11  -1   7 86.2837 44.4293   1
   9   8  16 1.65832 24.4473  -2
 -10  -1   7 1.65832 24.4473   1
   8   7  15 117.472 21.4366  -2
  -9  -1   7 117.472 21.4366   1
   7   6  14 381.952 24.4380  -2
  -8  -1   7 381.952 24.4380   1
   6   5  13 1044.93 39.0180  -2
  -7  -1   7 1044.93 39.0180   1
   5   4  12 320.027 58.3818  -2
  -6  -1   7 320.027 58.3818   1
  -5  -1   7 12.1430 3.82957   1
  -4  -1   7 136.490 7.06460   1
  -3  -1   7 452.024 10.4670   1
  -2  -1   7 691.409 12.8749   1
   1   0   8 1312.89 38.5506  -2
  -1  -1   7 1312.89 38.5506   1
   0  -1   7 3183.46 77.8032  -2
   0  -1   7 3183.46 77.8032   1
  -2  -3   5 1494.73 41.9727  -2
   2  -1   7 1494.73 41.9727   1
  -3  -4   4 1381.81 37.9368  -2
   3  -1   7 1381.81 37.9368   1
  -4  -5   3 275.151 18.6328  -2
   4  -1   7 275.151 18.6328   1
  -5  -6   2 555.435 25.2862  -2
   5  -1   7 555.435 25.2862   1
  -6  -7   1 587.494 25.9011  -2
   6  -1   7 587.494 25.9011   1
   7   8   0 -13.754 16.1901  -2
   7  -1   7 -13.754 16.1901   1
   8   9   1 825.092 37.9674  -2
   8  -1   7 825.092 37.9674   1
   9  10   2 262.585 44.9170  -2
   9  -1   7 262.585 44.9170   1
  10  11   3 -96.104 114.176  -2
  10  -1   7 -96.104 114.176   1
  11  12   4 46.6324 131.282  -2
  11  -1   7 46.6324 131.282   1
  12  13   5 11.4939 138.293  -2
  12  -1   7 11.4939 138.293   1
  10  10  17 15.6977 32.3061  -2
 -11   0   7 15.6977 32.3061   1
   9   9  16 49.0317 25.9009  -2
 -10   0   7 49.0317 25.9009   1
   8   8  15 44.0973 20.0835  -2
  -9   0   7 44.0973 20.0835   1
   7   7  14 611.242 27.8183  -2
  -8   0   7 611.242 27.8183   1
   6   6  13 329.989 21.6837  -2
  -7   0   7 329.989 21.6837   1
   5   5  12 95.4140 51.6882  -2
  -6   0   7 95.4140 51.6882   1
  -5   0   7 156.363 9.96867   1
  -4   0   7 -3.5258 2.84277   1
  -3   0   7 697.199 13.1611   1
  -2   0   7 68.8569 5.34462   1
   0   0   7 2001.35 52.2946  -2
   0   0   7 2001.35 52.2946   1
  -1  -1   6 1259.73 37.1356  -2
   1   0   7 1259.73 37.1356   1
  -2  -2   5 1550.01 43.7366  -2
   2   0   7 1550.01 43.7366   1
  -3  -3   4 1215.88 29.7426  -2
   3   0   7 1215.88 29.7426   1
  -4  -4   3 887.974 30.2077  -2
   4   0   7 887.974 30.2077   1
  -5  -5   2 471.899 23.7191  -2
   5   0   7 471.899 23.7191   1
  -6  -6   1 114.788 16.9579  -2
   6   0   7 114.788 16.9579   1
   7   7   0 22.8428 15.0683  -2
   7   0   7 22.8428 15.0683   1
   8   8   1 -27.225 20.9094  -2
   8   0   7 -27.225 20.9094   1
   9   9   2 126.170 37.8917  -2
   9   0   7 126.170 37.8917   1
  10  10   3 -8.2347 39.3871  -2
  10   0   7 -8.2347 39.3871   1
  11  11   4 135.617 46.0065  -2
  11   0   7 135.617 46.0065   1
  12  12   5 76.0359 132.730  -2
  12   0   7 76.0359 132.730   1
  13   0   7 2.33574 17.7985   1
   9  10  16 137.915 29.2184  -2
 -10   1   7 137.915 29.2184   1
   8   9  15 59.4624 25.0426  -2
  -9   1   7 59.4624 25.0426   1
   7   8  14 394.450 24.5639  -2
  -8   1   7 394.450 24.5639   1
   6   7  13 624.894 26.1737  -2
  -7   1   7 624.894 26.1737   1
   5   6  12 23.5204 21.1137  -2
  -6   1   7 23.5204 21.1137   1
  -5   1   7 164.506 12.1185   1
  -4   1   7 1216.07 21.5521   1
  -3   1   7 467.393 11.3912   1
  -2   1   7 62.5055 5.22790   1
  -1   1   7 582.189 13.3357   1
   0   1   7 60.7694 6.74552   1
  -1   0   6 927.589 41.3108  -2
   1   1   7 927.589 41.3108   1
  -2  -1   5 1390.16 39.3264  -2
   2   1   7 1390.16 39.3264   1
  -3  -2   4 294.935 14.4036  -2
   3   1   7 294.935 14.4036   1
  -4  -3   3 34.9085 12.5432  -2
   4   1   7 34.9085 12.5432   1
  -5  -4   2 61.0850 12.7526  -2
   5   1   7 61.0850 12.7526   1
  -6  -5   1 328.979 21.5288  -2
   6   1   7 328.979 21.5288   1
   7   6   0 316.971 23.2504  -2
   7   1   7 316.971 23.2504   1
   8   7   1 143.511 13.9930  -2
   8   1   7 143.511 13.9930   1
   9   8   2 789.602 33.1275  -2
   9   1   7 789.602 33.1275   1
  10   9   3 410.101 43.4048  -2
  10   1   7 410.101 43.4048   1
  11  10   4 77.5290 114.271  -2
  11   1   7 77.5290 114.271   1
  12  11   5 141.362 122.450  -2
  12   1   7 141.362 122.450   1
  13  12   6 67.9094 128.622  -2
  13   1   7 67.9094 128.622   1
   9  11  16 -6.8306 61.9517  -2
 -10   2   7 -6.8306 61.9517   1
   8  10  15 119.885 32.9416  -2
  -9   2   7 119.885 32.9416   1
   7   9  14 860.415 40.6521  -2
  -8   2   7 860.415 40.6521   1
   6   8  13 161.595 27.8041  -2
  -7   2   7 161.595 27.8041   1
   5   7  12 245.661 28.6362  -2
  -6   2   7 245.661 28.6362   1
  -5   2   7 2.80375 5.06630   1
  -4   2   7 218.054 12.4330   1
  -3   2   7 877.966 22.1467   1
  -2   2   7 354.732 10.1209   1
  -1   2   7 304.150 10.5379   1
   0   2   7 108.250 7.57339   1
   1   2   7 25.1152 4.08306   1
  -2   0   5 209.540 22.7726  -2
   2   2   7 209.540 22.7726   1
  -3  -1   4 182.248 16.3838  -2
   3   2   7 182.248 16.3838   1
  -4  -2   3 2064.50 53.5916  -2
   4   2   7 2064.50 53.5916   1
  -5  -3   2 1188.55 29.5583  -2
   5   2   7 1188.55 29.5583   1
  -6  -4   1 554.006 16.9076  -2
   6   2   7 554.006 16.9076   1
   7   5   0 2.19760 11.2024  -2
   7   2   7 2.19760 11.2024   1
   8   6   1 416.468 18.7184  -2
   8   2   7 416.468 18.7184   1
   9   7   2 17.2342 16.6837  -2
   9   2   7 17.2342 16.6837   1
  10   8   3 184.452 28.9012  -2
  10   2   7 184.452 28.9012   1
  11   9   4 187.684 43.6278  -2
  11   2   7 187.684 43.6278   1
  12  10   5 50.7267 111.777  -2
  12   2   7 50.7267 111.777   1
  13  11   6 111.973 124.804  -2
  13   2   7 111.973 124.804   1
   8  11  15 149.935 65.7693  -2
  -9   3   7 149.935 65.7693   1
   7  10  14 62.6787 27.4961  -2
  -8   3   7 62.6787 27.4961   1
   6   9  13 -31.549 23.8968  -2
  -7   3   7 -31.549 23.8968   1
   5   8  12 216.143 25.3962  -2
  -6   3   7 216.143 25.3962   1
  -5   3   7 17.2773 4.84408   1
  -4   3   7 2.48258 3.84759   1
  -3   3   7 -5.2998 4.07202   1
  -2   3   7 5.38487 3.98722   1
  -1   3   7 1413.78 39.8880   1
   0   3   7 1586.50 42.9247   1
   1   3   7 49.9898 12.4860   1
   2   3   7 626.335 16.7020   1
   3   3   7 477.812 14.6429   1
  -4  -1   3 1320.77 52.8879  -2
   4   3   7 1320.77 52.8879   1
  -5  -2   2 301.348 18.3484  -2
   5   3   7 301.348 18.3484   1
  -6  -3   1 522.359 19.2842  -2
   6   3   7 522.359 19.2842   1
   7   4   0 64.3462 18.7613  -2
   7   3   7 64.3462 18.7613   1
   8   5   1 -2.3114 12.2064  -2
   8   3   7 -2.3114 12.2064   1
   9   6   2 458.663 36.4468  -2
   9   3   7 458.663 36.4468   1
  10   7   3 392.685 26.4933  -2
  10   3   7 392.685 26.4933   1
  13  10   6 255.053 116.483  -2
  13   3   7 255.053 116.483   1
  13  10   5 160.386 44.4527  -2
  13   3   7 160.386 44.4527   1
  14   3   7 179.534 81.2935   1
   7  11  14 16.1879 60.2812  -2
  -8   4   7 16.1879 60.2812   1
   6  10  13 51.1289 25.6313  -2
  -7   4   7 51.1289 25.6313   1
   5   9  12 70.2572 25.4338  -2
  -6   4   7 70.2572 25.4338   1
  -5   4   7 4.50889 4.69007   1
  -4   4   7 819.397 31.4058   1
  -3   4   7 1145.32 37.6443   1
  -2   4   7 584.299 21.5152   1
  -1   4   7 738.161 26.4769   1
   0   4   7 828.902 27.9056   1
   1   4   7 1181.02 34.5528   1
   2   4   7 135.718 8.68603   1
   3   4   7 1.17529 3.10996   1
   4   4   7 10.8920 3.97412   1
   5   4   7 27.6775 5.17063   1
  -6  -2   1 1295.16 54.1369  -2
   6   4   7 1295.16 54.1369   1
   7   3   0 189.106 14.3495  -2
   7   4   7 189.106 14.3495   1
   8   4   1 30.7947 11.1640  -2
   8   4   7 30.7947 11.1640   1
   9   5   2 35.7809 30.1158  -2
   9   4   7 35.7809 30.1158   1
  10   6   3 165.338 33.1750  -2
  10   4   7 165.338 33.1750   1
  13   9   5 14.1469 40.6906  -2
  13   4   7 14.1469 40.6906   1
  14  10   7 450.814 118.477  -2
  14   4   7 450.814 118.477   1
   7  12  14 114.792 71.5820  -2
  -8   5   7 114.792 71.5820   1
   6  11  13 119.621 67.8924  -2
  -7   5   7 119.621 67.8924   1
   5  10  12 114.296 37.0419  -2
  -6   5   7 114.296 37.0419   1
   4   9  11 22.1128 33.5913  -2
  -5   5   7 22.1128 33.5913   1
  -4   5   7 384.196 22.3870   1
  -2   5   7 176.416 16.5857   1
  -1   5   7 3.07798 4.49145   1
   0   5   7 26.8594 5.86869   1
   1   5   7 556.641 22.4038   1
   2   5   7 180.279 14.1579   1
   3   5   7 427.720 14.8100   1
   4   5   7 -1.0214 3.86747   1
   5   5   7 338.885 15.4726   1
   6   5   7 26.1243 5.71417   1
   7   2   0 737.232 81.4917  -2
   7   5   7 737.232 81.4917   1
   8   3   1 159.518 28.6936  -2
   8   5   7 159.518 28.6936   1
   9   4   2 913.949 42.9665  -2
   9   5   7 913.949 42.9665   1
  10   5   3 873.073 58.6905  -2
  10   5   7 873.073 58.6905   1
  11   6   4 189.184 37.3310  -2
  11   5   7 189.184 37.3310   1
  14   9   6 157.107 50.3745  -2
  14   5   7 157.107 50.3745   1
   6  12  13 12.5581 45.3765  -2
  -7   6   7 12.5581 45.3765   1
   5  11  12 384.761 107.142  -2
  -6   6   7 384.761 107.142   1
   4  10  11 280.102 98.2053  -2
  -5   6   7 280.102 98.2053   1
  -4   6   7 29.7204 8.36342   1
  -3   6   7 1.10661 6.15114   1
  -2   6   7 -7.8043 5.91458   1
  -1   6   7 22.3345 6.02257   1
   0   6   7 2.19492 4.62530   1
   1   6   7 265.991 17.2235   1
   2   6   7 6.16255 4.67053   1
   3   6   7 548.259 23.4677   1
   4   6   7 650.032 20.3875   1
   5   6   7 228.939 13.8187   1
   6   6   7 5.52387 5.32714   1
   7   6   7 1037.85 29.1856   1
   8   2   1 644.199 72.2932  -2
   8   6   7 644.199 72.2932   1
   9   3   2 54.8436 30.9879  -2
   9   6   7 54.8436 30.9879   1
  10   4   3 85.1712 39.8916  -2
  10   6   7 85.1712 39.8916   1
   5  12  12 63.7862 75.2565  -2
  -6   7   7 63.7862 75.2565   1
   4  11  11 -91.698 97.8394  -2
  -5   7   7 -91.698 97.8394   1
   3  11  11 73.6264 33.1976  -2
  -5   7   7 73.6264 33.1976   1
  -4   7   7 101.353 19.9284   1
  -3   7   7 -4.2347 6.37012   1
  -2   7   7 16.1646 6.70026   1
  -1   7   7 29.5080 7.29857   1
   0   7   7 14.9172 5.93748   1
   1   7   7 673.804 27.7636   1
   2   7   7 740.699 28.9460   1
   3   7   7 1381.38 43.0086   1
   4   7   7 133.213 12.3142   1
   5   7   7 644.535 21.5920   1
   6   7   7 208.777 14.8640   1
   7   7   7 77.9469 11.3743   1
   8   7   7 18.8417 6.68616   1
   9   7   7 1.14912 8.85336   1
  10   3   3 787.731 45.4174  -2
  10   7   7 787.731 45.4174   1
  11   4   4 147.338 47.0416  -2
  11   7   7 147.338 47.0416   1
   3  12  11 0.06092 35.0133  -2
  -5   8   7 0.06092 35.0133   1
   4  12  11 -28.086 39.4292  -2
  -5   8   7 -28.086 39.4292   1
   3  11  10 132.322 49.3877  -2
  -4   8   7 132.322 49.3877   1
  -3   8   7 621.869 33.2458   1
  -2   8   7 853.511 36.2880   1
  -1   8   7 199.551 20.4898   1
   0   8   7 304.206 21.6151   1
   1   8   7 374.240 22.6156   1
   2   8   7 140.257 16.5445   1
   3   8   7 -2.8055 5.58762   1
   4   8   7 24.6112 6.76784   1
   5   8   7 -3.8314 5.02883   1
   6   8   7 31.9320 7.12774   1
   7   8   7 -7.2655 8.77628   1
   8   8   7 -1.9070 6.50499   1
   9   8   7 19.9154 10.3626   1
  10   2   3 -8.3492 54.5212  -2
  10   8   7 -8.3492 54.5212   1
  11   3   4 301.803 34.9054  -2
  11   8   7 301.803 34.9054   1
   3  13  11 246.142 45.1057  -2
  -5   9   7 246.142 45.1057   1
   3  12  10 250.728 56.6086  -2
  -4   9   7 250.728 56.6086   1
   2  12  10 355.065 44.9592  -2
  -4   9   7 355.065 44.9592   1
   1  11   9 -14.734 29.4286  -2
  -3   9   7 -14.734 29.4286   1
  -2   9   7 175.056 22.6452   1
  -1   9   7 386.074 26.1704   1
   0   9   7 335.347 24.1962   1
   1   9   7 39.5170 8.15419   1
   2   9   7 10.1463 6.45902   1
   3   9   7 191.418 19.6468   1
   4   9   7 10.4431 6.70790   1
   5   9   7 -3.8421 5.31581   1
   6   9   7 377.393 19.8679   1
   7   9   7 74.6428 12.5457   1
   8   9   7 11.3166 8.17260   1
   9   9   7 79.3158 16.0017   1
  10   9   7 15.0726 12.9274   1
  11   9   7 -15.540 16.8404   1
   4  15  12 296.091 53.9929  -2
  -6  10   7 296.091 53.9929   1
   3  14  11 138.155 45.5927  -2
  -5  10   7 138.155 45.5927   1
   2  13  10 54.2313 40.3992  -2
  -4  10   7 54.2313 40.3992   1
   1  12   9 113.065 37.8986  -2
  -3  10   7 113.065 37.8986   1
  -2  10   7 26.1472 9.02780   1
  -1  10   7 204.133 23.6268   1
   0  10   7 10.0562 7.49545   1
   1  10   7 26.7643 8.05276   1
   2  10   7 90.0591 18.5494   1
   3  10   7 -2.5713 6.83960   1
   4  10   7 180.884 21.3056   1
   5  10   7 39.0413 9.12514   1
   6  10   7 260.082 18.3123   1
   7  10   7 503.219 23.9170   1
   8  10   7 328.613 22.7557   1
   9  10   7 34.0239 13.4947   1
  10  10   7 -9.2309 15.5044   1
  11  10   7 9.62440 20.5989   1
  12  10   7 -25.560 19.7995   1
  14  10   7 13.4824 21.2823   1
   3  15  11 -5.5251 43.8547  -2
  -5  11   7 -5.5251 43.8547   1
   3  14  10 160.834 63.6760  -2
  -4  11   7 160.834 63.6760   1
   2  14  10 21.2078 43.3854  -2
  -4  11   7 21.2078 43.3854   1
   1  13   9 63.2560 41.2341  -2
  -3  11   7 63.2560 41.2341   1
   0  12   8 43.5536 37.1074  -2
  -2  11   7 43.5536 37.1074   1
  -1  11   7 129.921 37.1362  -2
  -1  11   7 129.921 37.1362   1
   0  11   7 69.1716 12.0392   1
   1  11   7 212.910 23.6933   1
   2  11   7 587.035 32.3245   1
  -4   8   4 727.704 63.3840  -2
   3  11   7 727.704 63.3840   1
  -6   6   2 31.2654 28.7287  -2
   5  11   7 31.2654 28.7287   1
  -7   5   1 22.0076 39.5370  -2
   6  11   7 22.0076 39.5370   1
  -8   4   0 -0.1750 40.1850  -2
   7  11   7 -0.1750 40.1850   1
   8  11   7 -12.053 10.0568   1
   9  11   7 -8.2186 12.4840   1
  10  11   7 14.9849 13.8843   1
  11  11   7 -28.196 20.0385   1
   2  15  10 11.3299 33.9888  -2
  -4  12   7 11.3299 33.9888   1
   1  14   9 119.145 35.3853  -2
  -3  12   7 119.145 35.3853   1
   0  13   8 121.626 42.1808  -2
  -2  12   7 121.626 42.1808   1
  -1  12   7 109.513 40.3809  -2
  -1  12   7 109.513 40.3809   1
  -2  11   6 121.267 41.0386  -2
   0  12   7 121.267 41.0386   1
   1  12   7 49.5437 10.9929   1
  -3  10   5 4.03650 39.4015  -2
   2  12   7 4.03650 39.4015   1
  -4   9   4 97.3719 43.5072  -2
   3  12   7 97.3719 43.5072   1
  -5   8   3 109.592 32.6967  -2
   4  12   7 109.592 32.6967   1
  -6   7   2 -7.3510 43.2787  -2
   5  12   7 -7.3510 43.2787   1
  -7   6   1 7.50425 44.2249  -2
   6  12   7 7.50425 44.2249   1
  -8   5   0 310.486 38.5414  -2
   7  12   7 310.486 38.5414   1
   9  -4   1 283.401 47.0690  -2
   8  12   7 283.401 47.0690   1
   9  12   7 16.6358 17.2489   1
  12  12   7 -25.528 24.4702   1
   0  14   8 118.722 35.5021  -2
  -2  13   7 118.722 35.5021   1
  -1  13   7 61.6096 41.7346  -2
  -1  13   7 61.6096 41.7346   1
  -2  12   6 39.8580 40.9312  -2
   0  13   7 39.8580 40.9312   1
   1  13   7 30.3811 19.7839   1
   2  13   7 353.973 45.4446   1
   3  13   7 233.158 40.3726   1
  -5   9   3 38.9170 34.0631  -2
   4  13   7 38.9170 34.0631   1
  -6   8   2 70.0516 35.2087  -2
   5  13   7 70.0516 35.2087   1
  -7   7   1 403.332 41.5038  -2
   6  13   7 403.332 41.5038   1
  -8   6   0 54.3437 36.1396  -2
   7  13   7 54.3437 36.1396   1
   9  -5   1 30.9231 44.9451  -2
   8  13   7 30.9231 44.9451   1
  10  13   7 -4.2880 17.7076   1
  11  13   7 23.7995 21.9475   1
  12  13   7 157.295 41.6063   1
  -1  14   7 71.9219 36.3566  -2
  -1  14   7 71.9219 36.3566   1
   0  14   7 160.382 44.1749   1
   1  14   7 32.9684 21.1198   1
   2  14   7 8.56709 18.2765   1
  -4  11   4 151.324 63.0043  -2
   3  14   7 151.324 63.0043   1
  -5  10   3 544.999 45.5368  -2
   4  14   7 544.999 45.5368   1
  -6   9   2 139.563 38.1660  -2
   5  14   7 139.563 38.1660   1
  -7   8   1 43.8733 50.3569  -2
   6  14   7 43.8733 50.3569   1
  -8   7   0 201.893 40.2760  -2
   7  14   7 201.893 40.2760   1
   9  -6   1 16.7383 49.8205  -2
   8  14   7 16.7383 49.8205   1
  11  14   7 9.23246 21.3907   1
   1  15   7 50.5602 23.4765   1
   2  15   7 34.0330 21.0763   1
   3  15   7 -9.3113 18.2577   1
  -5  11   3 210.490 67.3000  -2
   4  15   7 210.490 67.3000   1
  -6  10   2 27.2228 37.1376  -2
   5  15   7 27.2228 37.1376   1
  -7   9   1 104.203 38.2595  -2
   6  15   7 104.203 38.2595   1
  -8   8   0 66.4817 39.2994  -2
   7  15   7 66.4817 39.2994   1
   9  -7   1 16.9848 53.2144  -2
   8  15   7 16.9848 53.2144   1
   5  16   7 26.3246 21.2661   1
   6  16   7 129.773 41.5976   1
  -7 -11   8 10.9266 81.1456   1
   6  -5  14 179.302 30.2964  -2
  -6 -11   8 179.302 30.2964   1
   5  -6  13 207.926 23.1217  -2
  -5 -11   8 207.926 23.1217   1
   4  -7  12 241.802 22.8834  -2
  -4 -11   8 241.802 22.8834   1
   3  -8  11 108.680 18.1304  -2
  -3 -11   8 108.680 18.1304   1
   2  -9  10 36.8964 16.4324  -2
  -2 -11   8 36.8964 16.4324   1
   1 -10   9 0.82938 17.5712  -2
  -1 -11   8 0.82938 17.5712   1
   0 -11   8 5.70191 47.7870  -2
   0 -11   8 5.70191 47.7870   1
  -1 -12   7 0.76107 53.5848  -2
   1 -11   8 0.76107 53.5848   1
   7  -3  15 20.2539 42.4577  -2
  -7 -10   8 20.2539 42.4577   1
   6  -4  14 69.9046 27.9343  -2
  -6 -10   8 69.9046 27.9343   1
   5  -5  13 46.3921 19.8144  -2
  -5 -10   8 46.3921 19.8144   1
   4  -6  12 77.0638 19.1764  -2
  -4 -10   8 77.0638 19.1764   1
   3  -7  11 72.3318 16.8102  -2
  -3 -10   8 72.3318 16.8102   1
   2  -8  10 45.2370 15.6174  -2
  -2 -10   8 45.2370 15.6174   1
   1  -9   9 26.8917 16.3486  -2
  -1 -10   8 26.8917 16.3486   1
   0 -10   8 -23.234 17.9064  -2
   0 -10   8 -23.234 17.9064   1
  -1 -11   7 88.2528 39.7881  -2
   1 -10   8 88.2528 39.7881   1
  -2 -12   6 23.2503 54.3312  -2
   2 -10   8 23.2503 54.3312   1
  -3 -13   5 73.2800 57.9440  -2
   3 -10   8 73.2800 57.9440   1
  -9  -9   8 38.5159 16.8850   1
   8  -1  16 14.1023 44.5835  -2
  -8  -9   8 14.1023 44.5835   1
   7  -2  15 -12.040 34.0153  -2
  -7  -9   8 -12.040 34.0153   1
   6  -3  14 227.802 27.3280  -2
  -6  -9   8 227.802 27.3280   1
   5  -4  13 149.581 26.1183  -2
  -5  -9   8 149.581 26.1183   1
   4  -5  12 112.430 18.9866  -2
  -4  -9   8 112.430 18.9866   1
   3  -6  11 76.6765 17.4792  -2
  -3  -9   8 76.6765 17.4792   1
   2  -7  10 145.429 16.9472  -2
  -2  -9   8 145.429 16.9472   1
   1  -8   9 304.247 19.6780  -2
  -1  -9   8 304.247 19.6780   1
   0  -9   8 24.0700 15.3735  -2
   0  -9   8 24.0700 15.3735   1
  -1 -10   7 29.9700 17.6507  -2
   1  -9   8 29.9700 17.6507   1
  -2 -11   6 -16.697 24.0638  -2
   2  -9   8 -16.697 24.0638   1
  -3 -12   5 27.3343 51.3622  -2
   3  -9   8 27.3343 51.3622   1
  -4 -13   4 91.2343 61.1344  -2
   4  -9   8 91.2343 61.1344   1
   5  -9   8 14.9074 23.4149   1
   9   1  17 -26.436 64.6807  -2
 -10  -8   8 -26.436 64.6807   1
   8   0  16 11.6264 29.8076  -2
  -9  -8   8 11.6264 29.8076   1
  -8  -8   8 30.8664 10.4304   1
   7  -1  15 50.4734 34.1196  -2
  -7  -8   8 50.4734 34.1196   1
   6  -2  14 4.01901 23.1114  -2
  -6  -8   8 4.01901 23.1114   1
   5  -3  13 266.762 20.2765  -2
  -5  -8   8 266.762 20.2765   1
   4  -4  12 171.296 19.5355  -2
  -4  -8   8 171.296 19.5355   1
   3  -5  11 112.758 17.9327  -2
  -3  -8   8 112.758 17.9327   1
   2  -6  10 328.476 21.0525  -2
  -2  -8   8 328.476 21.0525   1
   1  -7   9 397.372 20.9694  -2
  -1  -8   8 397.372 20.9694   1
   0  -8   8 691.780 27.0905  -2
   0  -8   8 691.780 27.0905   1
  -1  -9   7 175.667 23.0895  -2
   1  -8   8 175.667 23.0895   1
  -2 -10   6 3.07822 21.4869  -2
   2  -8   8 3.07822 21.4869   1
  -3 -11   5 -19.379 25.2587  -2
   3  -8   8 -19.379 25.2587   1
  -4 -12   4 45.7019 50.3664  -2
   4  -8   8 45.7019 50.3664   1
  -6 -14   2 220.731 67.6263  -2
   6  -8   8 220.731 67.6263   1
   9   2  17 79.0545 49.5142  -2
 -10  -7   8 79.0545 49.5142   1
   8   1  16 125.734 39.3359  -2
  -9  -7   8 125.734 39.3359   1
   7   0  15 34.9379 54.9574  -2
  -8  -7   8 34.9379 54.9574   1
  -7  -7   8 3.38788 8.95134   1
   6  -1  14 237.094 25.4137  -2
  -6  -7   8 237.094 25.4137   1
   5  -2  13 36.7692 20.7323  -2
  -5  -7   8 36.7692 20.7323   1
   4  -3  12 274.956 23.9327  -2
  -4  -7   8 274.956 23.9327   1
   3  -4  11 162.711 18.3256  -2
  -3  -7   8 162.711 18.3256   1
   2  -5  10 -20.812 14.7245  -2
  -2  -7   8 -20.812 14.7245   1
   1  -6   9 -6.7834 10.9019  -2
  -1  -7   8 -6.7834 10.9019   1
   0  -7   8 14.9257 17.4970  -2
   0  -7   8 14.9257 17.4970   1
  -1  -8   7 482.007 28.8005  -2
   1  -7   8 482.007 28.8005   1
  -2  -9   6 241.721 24.0892  -2
   2  -7   8 241.721 24.0892   1
  -3 -10   5 34.0037 21.3439  -2
   3  -7   8 34.0037 21.3439   1
  -4 -11   4 100.725 28.3450  -2
   4  -7   8 100.725 28.3450   1
  -5 -12   3 146.546 32.6850  -2
   5  -7   8 146.546 32.6850   1
  -6 -13   2 -7.6672 56.3808  -2
   6  -7   8 -7.6672 56.3808   1
  -7 -14   1 34.3132 56.7170  -2
   7  -7   8 34.3132 56.7170   1
  10   4  18 -47.507 39.0083  -2
 -11  -6   8 -47.507 39.0083   1
   9   3  17 34.1850 39.9732  -2
 -10  -6   8 34.1850 39.9732   1
   8   2  16 171.651 39.9562  -2
  -9  -6   8 171.651 39.9562   1
   7   1  15 85.8650 124.307  -2
  -8  -6   8 85.8650 124.307   1
  -7  -6   8 -8.8572 8.70300   1
  -6  -6   8 21.1584 7.51596   1
   5  -1  13 30.0045 17.9492  -2
  -5  -6   8 30.0045 17.9492   1
   4  -2  12 31.9937 16.1823  -2
  -4  -6   8 31.9937 16.1823   1
   3  -3  11 -0.1784 14.4189  -2
  -3  -6   8 -0.1784 14.4189   1
   2  -4  10 345.068 19.2290  -2
  -2  -6   8 345.068 19.2290   1
   1  -5   9 650.568 24.9635  -2
  -1  -6   8 650.568 24.9635   1
   0  -6   8 1226.08 42.7098  -2
   0  -6   8 1226.08 42.7098   1
  -1  -7   7 494.574 27.4349  -2
   1  -6   8 494.574 27.4349   1
  -2  -8   6 594.389 30.4597  -2
   2  -6   8 594.389 30.4597   1
  -3  -9   5 374.094 26.6194  -2
   3  -6   8 374.094 26.6194   1
  -4 -10   4 59.2267 22.2661  -2
   4  -6   8 59.2267 22.2661   1
  -5 -11   3 -55.935 31.5479  -2
   5  -6   8 -55.935 31.5479   1
  -6 -12   2 34.8414 31.3881  -2
   6  -6   8 34.8414 31.3881   1
  -7 -13   1 -71.384 50.4819  -2
   7  -6   8 -71.384 50.4819   1
   8  14   0 -76.400 134.741  -2
   8  -6   8 -76.400 134.741   1
   9   4  17 -45.678 38.2885  -2
 -10  -5   8 -45.678 38.2885   1
   8   3  16 100.723 37.2859  -2
  -9  -5   8 100.723 37.2859   1
   7   2  15 72.1205 55.9016  -2
  -8  -5   8 72.1205 55.9016   1
   6   1  14 350.081 43.4515  -2
  -7  -5   8 350.081 43.4515   1
  -6  -5   8 317.924 17.3389   1
   5   0  13 100.072 130.059  -2
  -5  -5   8 100.072 130.059   1
   4  -1  12 506.694 21.7576  -2
  -4  -5   8 506.694 21.7576   1
   3  -2  11 941.547 27.2539  -2
  -3  -5   8 941.547 27.2539   1
   2  -3  10 417.370 20.0526  -2
  -2  -5   8 417.370 20.0526   1
   1  -4   9 324.439 18.2990  -2
  -1  -5   8 324.439 18.2990   1
   0  -5   8 254.808 21.2274  -2
   0  -5   8 254.808 21.2274   1
  -1  -6   7 188.483 20.0871  -2
   1  -5   8 188.483 20.0871   1
  -2  -7   6 80.9775 17.9435  -2
   2  -5   8 80.9775 17.9435   1
  -3  -8   5 483.124 27.7639  -2
   3  -5   8 483.124 27.7639   1
  -4  -9   4 263.391 25.2970  -2
   4  -5   8 263.391 25.2970   1
  -5 -10   3 215.165 25.6340  -2
   5  -5   8 215.165 25.6340   1
  -6 -11   2 -52.874 26.8493  -2
   6  -5   8 -52.874 26.8493   1
  -7 -12   1 100.465 32.7829  -2
   7  -5   8 100.465 32.7829   1
   8  13   0 -56.521 129.053  -2
   8  -5   8 -56.521 129.053   1
   9  14   1 -48.119 136.399  -2
   9  -5   8 -48.119 136.399   1
   9   5  17 -16.975 37.8008  -2
 -10  -4   8 -16.975 37.8008   1
   8   4  16 126.761 38.2121  -2
  -9  -4   8 126.761 38.2121   1
   7   3  15 224.969 37.8852  -2
  -8  -4   8 224.969 37.8852   1
  -7  -4   8 338.615 24.2005   1
  -6  -4   8 -1.6960 5.59224   1
  -5  -4   8 152.562 11.1228   1
   4   0  12 -28.050 100.329  -2
  -4  -4   8 -28.050 100.329   1
   3  -1  11 560.486 20.0605  -2
  -3  -4   8 560.486 20.0605   1
   2  -2  10 495.810 18.8692  -2
  -2  -4   8 495.810 18.8692   1
   1  -3   9 222.265 25.7024  -2
  -1  -4   8 222.265 25.7024   1
   0  -4   8 9.73193 15.7531  -2
   0  -4   8 9.73193 15.7531   1
  -1  -5   7 -2.5264 14.4042  -2
   1  -4   8 -2.5264 14.4042   1
  -2  -6   6 63.9838 17.2344  -2
   2  -4   8 63.9838 17.2344   1
  -3  -7   5 191.544 21.5403  -2
   3  -4   8 191.544 21.5403   1
  -4  -8   4 118.887 19.8827  -2
   4  -4   8 118.887 19.8827   1
  -5  -9   3 49.3626 21.5612  -2
   5  -4   8 49.3626 21.5612   1
  -6 -10   2 401.077 32.0774  -2
   6  -4   8 401.077 32.0774   1
  -7 -11   1 254.375 50.4396  -2
   7  -4   8 254.375 50.4396   1
   8  12   0 -17.738 40.1264  -2
   8  -4   8 -17.738 40.1264   1
   9  13   1 -0.8636 131.898  -2
   9  -4   8 -0.8636 131.898   1
  10  14   2 -53.537 132.403  -2
  10  -4   8 -53.537 132.403   1
  10   7  18 137.906 27.7696  -2
 -11  -3   8 137.906 27.7696   1
   9   6  17 452.740 50.9005  -2
 -10  -3   8 452.740 50.9005   1
   8   5  16 41.6026 36.0666  -2
  -9  -3   8 41.6026 36.0666   1
   7   4  15 718.125 35.9658  -2
  -8  -3   8 718.125 35.9658   1
   6   3  14 304.277 36.6492  -2
  -7  -3   8 304.277 36.6492   1
  -6  -3   8 6.22677 5.71915   1
  -5  -3   8 -11.670 4.75578   1
  -4  -3   8 173.205 10.2017   1
  -3  -3   8 371.101 13.3158   1
   2  -1  10 34.0929 11.1562  -2
  -2  -3   8 34.0929 11.1562   1
   1  -2   9 103.107 14.7996  -2
  -1  -3   8 103.107 14.7996   1
   0  -3   8 249.873 19.2851  -2
   0  -3   8 249.873 19.2851   1
  -1  -4   7 248.353 19.3740  -2
   1  -3   8 248.353 19.3740   1
  -2  -5   6 1030.98 36.4509  -2
   2  -3   8 1030.98 36.4509   1
  -3  -6   5 348.157 22.9240  -2
   3  -3   8 348.157 22.9240   1
  -4  -7   4 1493.39 47.3502  -2
   4  -3   8 1493.39 47.3502   1
  -5  -8   3 1285.07 43.4162  -2
   5  -3   8 1285.07 43.4162   1
  -6  -9   2 448.342 35.9096  -2
   6  -3   8 448.342 35.9096   1
  -7 -10   1 60.3573 26.6297  -2
   7  -3   8 60.3573 26.6297   1
   8  11   0 49.9329 29.0691  -2
   8  -3   8 49.9329 29.0691   1
   9  12   1 -29.465 41.0519  -2
   9  -3   8 -29.465 41.0519   1
  10  13   2 -26.017 49.0275  -2
  10  -3   8 -26.017 49.0275   1
  11  -3   8 -25.895 22.3579   1
  10   8  18 111.680 31.1563  -2
 -11  -2   8 111.680 31.1563   1
   9   7  17 65.4150 24.7237  -2
 -10  -2   8 65.4150 24.7237   1
   8   6  16 49.5785 26.4221  -2
  -9  -2   8 49.5785 26.4221   1
   7   5  15 30.3096 26.8232  -2
  -8  -2   8 30.3096 26.8232   1
   6   4  14 -23.645 34.7323  -2
  -7  -2   8 -23.645 34.7323   1
   5   3  13 70.0792 49.1246  -2
  -6  -2   8 70.0792 49.1246   1
   4   2  12 -68.842 86.3447  -2
  -5  -2   8 -68.842 86.3447   1
  -4  -2   8 33.9883 4.10015   1
  -3  -2   8 0.46406 2.55464   1
   2   0  10 684.512 58.6684  -2
  -2  -2   8 684.512 58.6684   1
   1  -1   9 3099.18 90.3353  -2
  -1  -2   8 3099.18 90.3353   1
   0  -2   8 2173.04 53.5723  -2
   0  -2   8 2173.04 53.5723   1
  -1  -3   7 1831.23 48.0617  -2
   1  -2   8 1831.23 48.0617   1
  -2  -4   6 882.087 31.5141  -2
   2  -2   8 882.087 31.5141   1
  -3  -5   5 54.4916 16.1889  -2
   3  -2   8 54.4916 16.1889   1
  -4  -6   4 168.036 19.7646  -2
   4  -2   8 168.036 19.7646   1
  -5  -7   3 47.4162 17.3548  -2
   5  -2   8 47.4162 17.3548   1
  -6  -8   2 67.0822 17.0943  -2
   6  -2   8 67.0822 17.0943   1
  -7  -9   1 290.758 24.7510  -2
   7  -2   8 290.758 24.7510   1
   8  10   0 -45.699 25.0546  -2
   8  -2   8 -45.699 25.0546   1
   9  11   1 -31.112 38.5136  -2
   9  -2   8 -31.112 38.5136   1
  10  12   2 -57.777 42.4711  -2
  10  -2   8 -57.777 42.4711   1
  11  -2   8 37.2264 20.1978   1
  10   9  18 220.803 47.7140  -2
 -11  -1   8 220.803 47.7140   1
   9   8  17 41.0642 22.5147  -2
 -10  -1   8 41.0642 22.5147   1
   8   7  16 3.50418 18.1728  -2
  -9  -1   8 3.50418 18.1728   1
   7   6  15 -1.5998 18.6786  -2
  -8  -1   8 -1.5998 18.6786   1
   6   5  14 1.50236 18.3429  -2
  -7  -1   8 1.50236 18.3429   1
   5   4  13 -13.123 19.6958  -2
  -6  -1   8 -13.123 19.6958   1
  -5  -1   8 33.4109 3.69814   1
   3   2  11 -52.920 80.3332  -2
  -4  -1   8 -52.920 80.3332   1
  -3  -1   8 1768.35 26.3653   1
  -2  -1   8 1126.74 18.5188   1
   0  -1   8 575.042 25.7100  -2
   0  -1   8 575.042 25.7100   1
  -1  -2   7 531.863 22.7828  -2
   1  -1   8 531.863 22.7828   1
  -2  -3   6 341.925 19.9017  -2
   2  -1   8 341.925 19.9017   1
  -3  -4   5 -28.944 20.5215  -2
   3  -1   8 -28.944 20.5215   1
  -4  -5   4 -9.3103 14.4399  -2
   4  -1   8 -9.3103 14.4399   1
  -5  -6   3 659.777 28.4501  -2
   5  -1   8 659.777 28.4501   1
  -6  -7   2 256.405 21.8877  -2
   6  -1   8 256.405 21.8877   1
  -7  -8   1 51.1462 19.8236  -2
   7  -1   8 51.1462 19.8236   1
   8   9   0 278.824 25.4869  -2
   8  -1   8 278.824 25.4869   1
   9  10   1 102.261 36.6734  -2
   9  -1   8 102.261 36.6734   1
  10  11   2 131.613 46.0248  -2
  10  -1   8 131.613 46.0248   1
  11  12   3 -31.954 129.436  -2
  11  -1   8 -31.954 129.436   1
  12  13   4 -103.40 135.058  -2
  12  -1   8 -103.40 135.058   1
  10  10  18 -1.2755 84.2954  -2
 -11   0   8 -1.2755 84.2954   1
   9   9  17 57.0201 33.9688  -2
 -10   0   8 57.0201 33.9688   1
   8   8  16 234.614 23.8614  -2
  -9   0   8 234.614 23.8614   1
   7   7  15 409.413 25.0896  -2
  -8   0   8 409.413 25.0896   1
   6   6  14 559.998 25.2776  -2
  -7   0   8 559.998 25.2776   1
   5   5  13 384.122 25.8689  -2
  -6   0   8 384.122 25.8689   1
   4   4  12 77.6366 21.8218  -2
  -5   0   8 77.6366 21.8218   1
  -4   0   8 694.885 14.0885   1
  -3   0   8 55.4738 5.98686   1
  -2   0   8 125.483 6.43326   1
  -1   0   8 911.850 21.5049   1
   0   0   8 1310.43 27.7446   1
  -1  -1   7 1261.94 38.8517  -2
   1   0   8 1261.94 38.8517   1
  -2  -2   6 1553.90 45.2435  -2
   2   0   8 1553.90 45.2435   1
  -3  -3   5 -19.497 14.4959  -2
   3   0   8 -19.497 14.4959   1
  -4  -4   4 290.532 19.9228  -2
   4   0   8 290.532 19.9228   1
  -6  -6   2 410.920 24.0836  -2
   6   0   8 410.920 24.0836   1
  -7  -7   1 330.327 23.9162  -2
   7   0   8 330.327 23.9162   1
   8   8   0 384.422 25.3383  -2
   8   0   8 384.422 25.3383   1
   9   9   1 515.895 42.7625  -2
   9   0   8 515.895 42.7625   1
  10  10   2 87.3635 113.714  -2
  10   0   8 87.3635 113.714   1
  11  11   3 13.9218 120.330  -2
  11   0   8 13.9218 120.330   1
  12  12   4 17.0420 127.779  -2
  12   0   8 17.0420 127.779   1
   9  10  17 128.698 67.6112  -2
 -10   1   8 128.698 67.6112   1
   8   9  16 257.162 31.6267  -2
  -9   1   8 257.162 31.6267   1
   7   8  15 332.258 31.5031  -2
  -8   1   8 332.258 31.5031   1
   6   7  14 1144.21 34.7024  -2
  -7   1   8 1144.21 34.7024   1
   5   6  13 32.3981 21.4166  -2
  -6   1   8 32.3981 21.4166   1
   4   5  12 54.2914 21.9799  -2
  -5   1   8 54.2914 21.9799   1
  -4   1   8 56.9812 6.34440   1
  -3   1   8 62.2295 4.95126   1
  -2   1   8 80.7769 5.92288   1
  -1   1   8 6.47033 2.86249   1
   0   1   8 414.134 13.1251   1
   1   1   8 1006.61 24.6368   1
  -2  -1   6 1116.53 48.9608  -2
   2   1   8 1116.53 48.9608   1
  -3  -2   5 981.429 32.9517  -2
   3   1   8 981.429 32.9517   1
  -4  -3   4 1458.33 34.9519  -2
   4   1   8 1458.33 34.9519   1
  -5  -4   3 1558.96 37.1607  -2
   5   1   8 1558.96 37.1607   1
  -6  -5   2 10.2524 23.1324  -2
   6   1   8 10.2524 23.1324   1
  -7  -6   1 83.8027 13.7759  -2
   7   1   8 83.8027 13.7759   1
   8   7   0 232.466 22.7215  -2
   8   1   8 232.466 22.7215   1
  11  10   3 67.8150 112.434  -2
  11   1   8 67.8150 112.434   1
  12  11   4 9.81332 119.637  -2
  12   1   8 9.81332 119.637   1
  13  12   5 -12.001 126.514  -2
  13   1   8 -12.001 126.514   1
   9  11  17 119.883 92.8927  -2
 -10   2   8 119.883 92.8927   1
   8  10  16 -10.495 57.7910  -2
  -9   2   8 -10.495 57.7910   1
   7   9  15 47.5722 24.6727  -2
  -8   2   8 47.5722 24.6727   1
   6   8  14 -20.975 27.2524  -2
  -7   2   8 -20.975 27.2524   1
   5   7  13 131.031 18.3110  -2
  -6   2   8 131.031 18.3110   1
   4   6  12 -9.4128 27.9120  -2
  -5   2   8 -9.4128 27.9120   1
  -4   2   8 615.512 16.4819   1
  -3   2   8 182.624 8.08984   1
  -2   2   8 -1.0853 2.69853   1
  -1   2   8 243.535 10.2166   1
   0   2   8 261.634 9.94388   1
   1   2   8 163.186 9.95310   1
   2   2   8 510.500 16.0060   1
  -3  -1   5 1117.18 50.2508  -2
   3   2   8 1117.18 50.2508   1
  -4  -2   4 300.071 25.8382  -2
   4   2   8 300.071 25.8382   1
  -5  -3   3 38.0294 16.1628  -2
   5   2   8 38.0294 16.1628   1
  -6  -4   2 50.3350 17.7259  -2
   6   2   8 50.3350 17.7259   1
  -7  -5   1 397.976 18.6348  -2
   7   2   8 397.976 18.6348   1
   8   6   0 26.3427 14.2363  -2
   8   2   8 26.3427 14.2363   1
   9   7   1 333.504 24.5660  -2
   9   2   8 333.504 24.5660   1
  11   9   3 68.4348 29.6194  -2
  11   2   8 68.4348 29.6194   1
  12  10   4 82.4247 109.159  -2
  12   2   8 82.4247 109.159   1
  13  11   5 38.2046 122.300  -2
  13   2   8 38.2046 122.300   1
  13  11   4 13.3826 45.3013  -2
  13   2   8 13.3826 45.3013   1
   7  10  15 -14.098 54.9261  -2
  -8   3   8 -14.098 54.9261   1
   6   9  14 249.225 31.2692  -2
  -7   3   8 249.225 31.2692   1
   5   8  13 357.465 29.7597  -2
  -6   3   8 357.465 29.7597   1
   4   7  12 89.7735 23.6476  -2
  -5   3   8 89.7735 23.6476   1
  -4   3   8 646.770 20.8292   1
  -3   3   8 1558.71 40.9286   1
  -2   3   8 721.825 23.3561   1
  -1   3   8 43.9664 8.01963   1
   0   3   8 115.365 8.23467   1
   1   3   8 157.684 9.27856   1
   2   3   8 225.489 10.4751   1
   3   3   8 163.881 9.84328   1
  -4  -1   4 1164.38 50.0458  -2
   4   3   8 1164.38 50.0458   1
  -5  -2   3 2175.16 55.9826  -2
   5   3   8 2175.16 55.9826   1
  -6  -3   2 340.422 21.0497  -2
   6   3   8 340.422 21.0497   1
  -7  -4   1 23.5159 26.1814  -2
   7   3   8 23.5159 26.1814   1
   8   5   0 156.959 13.7184  -2
   8   3   8 156.959 13.7184   1
   9   6   1 92.9091 30.7483  -2
   9   3   8 92.9091 30.7483   1
  10   7   2 266.074 32.9921  -2
  10   3   8 266.074 32.9921   1
  11   8   3 219.972 33.1915  -2
  11   3   8 219.972 33.1915   1
  13  10   4 170.516 44.5978  -2
  13   3   8 170.516 44.5978   1
  14   3   8 22.8836 51.7701   1
   7  11  15 207.581 87.7108  -2
  -8   4   8 207.581 87.7108   1
   6  10  14 87.3085 54.9026  -2
  -7   4   8 87.3085 54.9026   1
   5   9  13 543.409 36.7465  -2
  -6   4   8 543.409 36.7465   1
   4   8  12 38.2849 29.1764  -2
  -5   4   8 38.2849 29.1764   1
  -4   4   8 159.719 15.2312   1
  -3   4   8 30.1411 6.22985   1
  -2   4   8 25.1053 5.43278   1
  -1   4   8 1.43501 4.19447   1
   0   4   8 405.730 19.2717   1
   1   4   8 1.82047 4.78332   1
   2   4   8 28.5617 5.12512   1
   3   4   8 602.040 17.7417   1
   4   4   8 93.0995 9.60278   1
   5   4   8 970.626 25.6792   1
   6   4   8 1173.71 25.7615   1
  -7  -3   1 697.766 32.7518  -2
   7   4   8 697.766 32.7518   1
   8   4   0 20.8441 14.9434  -2
   8   4   8 20.8441 14.9434   1
  10   6   2 153.635 36.1423  -2
  10   4   8 153.635 36.1423   1
  11   7   3 144.760 31.2294  -2
  11   4   8 144.760 31.2294   1
  13   9   4 66.0464 42.9472  -2
  13   4   8 66.0464 42.9472   1
  14  10   5 123.220 47.8929  -2
  14   4   8 123.220 47.8929   1
   6  11  14 31.4639 58.1245  -2
  -7   5   8 31.4639 58.1245   1
   5  10  13 141.397 55.9807  -2
  -6   5   8 141.397 55.9807   1
   4   9  12 60.2286 31.9066  -2
  -5   5   8 60.2286 31.9066   1
   3   8  11 82.2739 59.4872  -2
  -4   5   8 82.2739 59.4872   1
  -3   5   8 465.014 24.6194   1
  -2   5   8 1030.11 36.2453   1
  -1   5   8 97.5853 13.8872   1
   0   5   8 331.426 18.6382   1
   1   5   8 845.796 29.2156   1
   2   5   8 237.666 15.6100   1
   3   5   8 0.16935 3.30558   1
   4   5   8 477.529 16.6680   1
   5   5   8 6.77235 4.63295   1
   6   5   8 100.600 11.7576   1
  -7  -2   1 641.521 38.3578  -2
   7   5   8 641.521 38.3578   1
   8   5   8 201.840 12.2863   1
   9   4   1 40.4334 27.5877  -2
   9   5   8 40.4334 27.5877   1
  10   5   2 82.3326 42.1690  -2
  10   5   8 82.3326 42.1690   1
  11   6   3 223.347 38.3985  -2
  11   5   8 223.347 38.3985   1
  14   9   5 184.065 50.7319  -2
  14   5   8 184.065 50.7319   1
  -9   6   8 51.7395 52.1215   1
   6  12  14 133.277 97.3035  -2
  -7   6   8 133.277 97.3035   1
   5  11  13 58.1620 62.2336  -2
  -6   6   8 58.1620 62.2336   1
   4  10  12 61.5144 80.7554  -2
  -5   6   8 61.5144 80.7554   1
   3   9  11 128.739 81.9083  -2
  -4   6   8 128.739 81.9083   1
  -2   6   8 4.63734 5.77207   1
  -1   6   8 241.879 18.8226   1
   0   6   8 77.5440 13.9834   1
   1   6   8 658.727 26.2474   1
   2   6   8 1646.59 47.4600   1
   3   6   8 1153.39 36.9376   1
   4   6   8 11.9276 4.55219   1
   5   6   8 -1.3542 4.39162   1
   6   6   8 1.17876 5.01043   1
   7   6   8 81.4046 12.4911   1
   8   6   8 56.6310 8.21681   1
   9   3   1 381.642 79.7645  -2
   9   6   8 381.642 79.7645   1
  10   4   2 798.762 54.8264  -2
  10   6   8 798.762 54.8264   1
  11   5   3 45.1023 44.5895  -2
  11   6   8 45.1023 44.5895   1
   5  12  13 115.323 71.6103  -2
  -6   7   8 115.323 71.6103   1
   3  11  12 318.157 42.3943  -2
  -5   7   8 318.157 42.3943   1
   4  11  12 67.3965 64.6665  -2
  -5   7   8 67.3965 64.6665   1
   3  10  11 30.0026 86.4702  -2
  -4   7   8 30.0026 86.4702   1
  -3   7   8 332.020 25.0197   1
  -2   7   8 111.820 18.0594   1
  -1   7   8 2.29661 5.53022   1
   0   7   8 26.6419 6.99455   1
   1   7   8 9.22462 5.78856   1
   2   7   8 181.972 16.8523   1
   3   7   8 34.1882 6.96242   1
   4   7   8 53.4450 6.69308   1
   5   7   8 351.779 16.6984   1
   6   7   8 20.6799 6.00337   1
   7   7   8 320.800 18.0521   1
   8   7   8 481.260 21.4246   1
   9   7   8 2.30667 6.79131   1
  10   3   2 179.586 65.2216  -2
  10   7   8 179.586 65.2216   1
  11   4   3 294.301 34.5363  -2
  11   7   8 294.301 34.5363   1
  12   5   4 21.9314 49.4357  -2
  12   7   8 21.9314 49.4357   1
   3  12  12 182.923 42.2333  -2
  -5   8   8 182.923 42.2333   1
   2  11  11 -0.6330 33.6591  -2
  -4   8   8 -0.6330 33.6591   1
  -3   8   8 27.9651 9.37373   1
  -2   8   8 0.66305 8.00109   1
  -1   8   8 7.86867 6.95942   1
   0   8   8 134.407 18.1366   1
   1   8   8 239.119 19.5977   1
   2   8   8 1743.58 52.9284   1
   3   8   8 1317.08 43.7823   1
   4   8   8 -7.7904 9.73523   1
   5   8   8 65.1217 11.9038   1
   6   8   8 360.314 18.4395   1
   7   8   8 337.065 18.8343   1
   8   8   8 89.8359 16.3175   1
   9   8   8 -0.3206 7.19269   1
  10   8   8 -3.8442 9.93339   1
  11   8   8 46.9676 13.2332   1
   3  13  12 -13.806 39.1355  -2
  -5   9   8 -13.806 39.1355   1
   2  12  11 12.8413 36.3734  -2
  -4   9   8 12.8413 36.3734   1
   1  11  10 209.912 39.3069  -2
  -3   9   8 209.912 39.3069   1
  -2   9   8 166.030 22.4723   1
  -1   9   8 22.0470 8.06441   1
   0   9   8 609.216 31.4712   1
   1   9   8 151.161 19.4048   1
   2   9   8 163.894 18.8911   1
   3   9   8 108.921 17.7528   1
   4   9   8 177.132 19.2858   1
   5   9   8 0.63683 5.35569   1
   6   9   8 89.0345 14.4991   1
   7   9   8 159.312 17.1009   1
   8   9   8 117.158 16.6264   1
   9   9   8 9.75135 8.29203   1
  10   9   8 14.8005 12.1775   1
  11   9   8 2.02889 18.1505   1
  12   9   8 -20.218 17.8148   1
   4  15  13 72.6060 49.3095  -2
  -6  10   8 72.6060 49.3095   1
   3  14  12 260.694 49.7171  -2
  -5  10   8 260.694 49.7171   1
   2  13  11 99.1282 34.2012  -2
  -4  10   8 99.1282 34.2012   1
   1  12  10 5.20514 36.0409  -2
  -3  10   8 5.20514 36.0409   1
   0  11   9 258.906 39.1259  -2
  -2  10   8 258.906 39.1259   1
  -1  10   8 400.609 41.6665  -2
  -1  10   8 400.609 41.6665   1
   0  10   8 41.3750 9.25480   1
   1  10   8 8.96656 7.29465   1
   2  10   8 2.77767 7.25509   1
   3  10   8 4.55462 7.21945   1
   4  10   8 47.4293 9.58845   1
   5  10   8 -6.0958 6.67078   1
  -7   4   2 434.403 44.7691  -2
   6  10   8 434.403 44.7691   1
   7  10   8 -5.3229 7.40088   1
   8  10   8 17.9750 8.96129   1
   9  10   8 232.649 20.7823   1
  10  10   8 -0.0061 12.2001   1
  11  10   8 -7.2441 19.5575   1
  12  10   8 36.0097 22.9678   1
  14  10   8 9.36465 19.6598   1
   3  15  12 69.3113 46.8080  -2
  -5  11   8 69.3113 46.8080   1
   2  14  11 -4.5100 33.1452  -2
  -4  11   8 -4.5100 33.1452   1
   1  13  10 176.877 44.3194  -2
  -3  11   8 176.877 44.3194   1
   0  12   9 201.704 41.5156  -2
  -2  11   8 201.704 41.5156   1
  -1  11   8 48.0768 36.0297  -2
  -1  11   8 48.0768 36.0297   1
  -2  10   7 41.8928 33.8924  -2
   0  11   8 41.8928 33.8924   1
   1  11   8 3.11544 7.40801   1
   2  11   8 -1.1741 7.81826   1
  -4   8   5 54.1073 49.7587  -2
   3  11   8 54.1073 49.7587   1
  -5   7   4 -50.322 37.0001  -2
   4  11   8 -50.322 37.0001   1
  -7   5   2 238.243 31.8015  -2
   6  11   8 238.243 31.8015   1
  -8   4   1 929.786 47.4161  -2
   7  11   8 929.786 47.4161   1
  -9   3   0 440.629 68.0569  -2
   8  11   8 440.629 68.0569   1
   9  11   8 23.1381 10.9568   1
  10  11   8 26.7416 18.1536   1
  11  11   8 27.6013 22.7372   1
   2  15  11 -19.194 43.8850  -2
  -4  12   8 -19.194 43.8850   1
   1  14  10 10.2070 54.2259  -2
  -3  12   8 10.2070 54.2259   1
   0  13   9 0.81690 32.0351  -2
  -2  12   8 0.81690 32.0351   1
  -1  12   8 106.070 39.2745  -2
  -1  12   8 106.070 39.2745   1
  -2  11   7 53.5906 36.9409  -2
   0  12   8 53.5906 36.9409   1
  -3  10   6 85.0976 39.6849  -2
   1  12   8 85.0976 39.6849   1
   2  12   8 330.191 28.2635   1
  -4   9   5 365.981 48.3788  -2
   3  12   8 365.981 48.3788   1
  -5   8   4 60.9793 33.1383  -2
   4  12   8 60.9793 33.1383   1
  -6   7   3 58.9150 31.5948  -2
   5  12   8 58.9150 31.5948   1
  -7   6   2 319.877 36.5941  -2
   6  12   8 319.877 36.5941   1
  -8   5   1 -34.717 41.0225  -2
   7  12   8 -34.717 41.0225   1
  -9   4   0 -10.559 40.8829  -2
   8  12   8 -10.559 40.8829   1
   0  14   9 207.809 37.3226  -2
  -2  13   8 207.809 37.3226   1
  -1  13   8 161.791 35.9264  -2
  -1  13   8 161.791 35.9264   1
  -2  12   7 147.175 43.9897  -2
   0  13   8 147.175 43.9897   1
   1  13   8 289.862 44.5174   1
   2  13   8 31.9637 18.6259   1
   3  13   8 21.0395 18.0647   1
  -5   9   4 208.854 36.5088  -2
   4  13   8 208.854 36.5088   1
  -6   8   3 262.777 38.2113  -2
   5  13   8 262.777 38.2113   1
  -7   7   2 93.0576 36.0070  -2
   6  13   8 93.0576 36.0070   1
  -8   6   1 -29.813 33.3233  -2
   7  13   8 -29.813 33.3233   1
  -9   5   0 84.4539 43.2807  -2
   8  13   8 84.4539 43.2807   1
  12  13   8 -4.7973 21.2114   1
  -2  13   7 204.722 66.4726  -2
   0  14   8 204.722 66.4726   1
   1  14   8 17.5962 19.0189   1
   2  14   8 11.8129 17.7597   1
   3  14   8 -8.9480 15.9803   1
  -5  10   4 94.2621 58.6532  -2
   4  14   8 94.2621 58.6532   1
  -6   9   3 57.8473 37.0476  -2
   5  14   8 57.8473 37.0476   1
  -7   8   2 403.639 43.2012  -2
   6  14   8 403.639 43.2012   1
  -8   7   1 163.959 39.4284  -2
   7  14   8 163.959 39.4284   1
  -9   6   0 -17.326 35.6887  -2
   8  14   8 -17.326 35.6887   1
   2  15   8 14.9079 18.3908   1
   3  15   8 65.9395 22.9442   1
  -5  11   4 198.991 64.4661  -2
   4  15   8 198.991 64.4661   1
  -6  10   3 243.813 64.0330  -2
   5  15   8 243.813 64.0330   1
  -7   9   2 82.8874 37.5462  -2
   6  15   8 82.8874 37.5462   1
  -8   8   1 238.737 41.8367  -2
   7  15   8 238.737 41.8367   1
  -9   7   0 98.6782 39.0950  -2
   8  15   8 98.6782 39.0950   1
  10  15   8 -10.177 20.0999   1
   5  16   8 146.606 30.3146   1
   6  16   8 89.8102 17.1515   1
   7  16   8 5.20241 19.8594   1
   4  -7  13 39.7477 20.5855  -2
  -4 -11   9 39.7477 20.5855   1
   3  -8  12 45.3369 18.5284  -2
  -3 -11   9 45.3369 18.5284   1
   2  -9  11 100.604 18.7911  -2
  -2 -11   9 100.604 18.7911   1
   1 -10  10 53.5786 18.4536  -2
  -1 -11   9 53.5786 18.4536   1
  -7 -10   9 147.981 21.7204   1
   6  -4  15 326.782 34.3725  -2
  -6 -10   9 326.782 34.3725   1
   5  -5  14 160.055 23.4399  -2
  -5 -10   9 160.055 23.4399   1
   4  -6  13 206.854 22.4878  -2
  -4 -10   9 206.854 22.4878   1
   3  -7  12 439.278 25.6493  -2
  -3 -10   9 439.278 25.6493   1
   2  -8  11 129.539 18.0737  -2
  -2 -10   9 129.539 18.0737   1
   1  -9  10 -3.3264 15.5871  -2
  -1 -10   9 -3.3264 15.5871   1
   0 -10   9 -27.741 15.4282  -2
   0 -10   9 -27.741 15.4282   1
  -1 -11   8 -47.334 29.8598  -2
   1 -10   9 -47.334 29.8598   1
  -2 -12   7 -3.8990 40.3783  -2
   2 -10   9 -3.8990 40.3783   1
  -8  -9   9 17.4801 12.3340   1
   7  -2  16 185.532 47.6687  -2
  -7  -9   9 185.532 47.6687   1
   6  -3  15 26.1818 25.6443  -2
  -6  -9   9 26.1818 25.6443   1
   5  -4  14 93.4830 21.0028  -2
  -5  -9   9 93.4830 21.0028   1
   4  -5  13 11.3542 18.6520  -2
  -4  -9   9 11.3542 18.6520   1
   3  -6  12 33.1146 17.4103  -2
  -3  -9   9 33.1146 17.4103   1
   2  -7  11 37.8223 16.6872  -2
  -2  -9   9 37.8223 16.6872   1
   1  -8  10 39.1317 15.3693  -2
  -1  -9   9 39.1317 15.3693   1
   0  -9   9 -6.1689 9.23795  -2
   0  -9   9 -6.1689 9.23795   1
  -1 -10   8 -37.840 17.8402  -2
   1  -9   9 -37.840 17.8402   1
  -2 -11   7 33.8566 23.6618  -2
   2  -9   9 33.8566 23.6618   1
  -3 -12   6 117.995 52.9315  -2
   3  -9   9 117.995 52.9315   1
  -4 -13   5 105.340 61.4528  -2
   4  -9   9 105.340 61.4528   1
   8   0  17 36.7013 39.3392  -2
  -9  -8   9 36.7013 39.3392   1
  -8  -8   9 8.26729 14.0140   1
  -7  -8   9 13.3918 10.6361   1
   6  -2  15 116.568 28.7458  -2
  -6  -8   9 116.568 28.7458   1
   5  -3  14 75.0868 20.8982  -2
  -5  -8   9 75.0868 20.8982   1
   4  -4  13 -7.8891 18.3795  -2
  -4  -8   9 -7.8891 18.3795   1
   3  -5  12 44.5979 18.2480  -2
  -3  -8   9 44.5979 18.2480   1
   2  -6  11 85.6855 14.8978  -2
  -2  -8   9 85.6855 14.8978   1
   1  -7  10 46.4607 16.4625  -2
  -1  -8   9 46.4607 16.4625   1
   0  -8   9 265.653 20.3802  -2
   0  -8   9 265.653 20.3802   1
  -1  -9   8 381.793 29.1922  -2
   1  -8   9 381.793 29.1922   1
  -2 -10   7 207.263 25.6680  -2
   2  -8   9 207.263 25.6680   1
  -3 -11   6 -4.2497 23.1102  -2
   3  -8   9 -4.2497 23.1102   1
  -4 -12   5 72.0613 52.2617  -2
   4  -8   9 72.0613 52.2617   1
  -5 -13   4 41.0575 59.6921  -2
   5  -8   9 41.0575 59.6921   1
   6  -8   9 3.49635 22.9657   1
   9   2  18 35.0431 39.8765  -2
 -10  -7   9 35.0431 39.8765   1
   8   1  17 -11.793 36.9382  -2
  -9  -7   9 -11.793 36.9382   1
   7   0  16 1.96521 61.3142  -2
  -8  -7   9 1.96521 61.3142   1
  -7  -7   9 5.37928 8.98394   1
   6  -1  15 -3.3369 24.8070  -2
  -6  -7   9 -3.3369 24.8070   1
   5  -2  14 11.8764 21.7174  -2
  -5  -7   9 11.8764 21.7174   1
   4  -3  13 65.6743 18.8602  -2
  -4  -7   9 65.6743 18.8602   1
   3  -4  12 -28.331 16.6267  -2
  -3  -7   9 -28.331 16.6267   1
   2  -5  11 705.674 27.7431  -2
  -2  -7   9 705.674 27.7431   1
   1  -6  10 944.729 32.3782  -2
  -1  -7   9 944.729 32.3782   1
   0  -7   9 465.892 30.4499  -2
   0  -7   9 465.892 30.4499   1
  -1  -8   8 369.135 27.7306  -2
   1  -7   9 369.135 27.7306   1
  -2  -9   7 122.182 22.1849  -2
   2  -7   9 122.182 22.1849   1
  -3 -10   6 44.3102 19.9602  -2
   3  -7   9 44.3102 19.9602   1
  -4 -11   5 31.5942 24.1039  -2
   4  -7   9 31.5942 24.1039   1
  -5 -12   4 -5.5028 38.0126  -2
   5  -7   9 -5.5028 38.0126   1
  -6 -13   3 -36.796 52.1887  -2
   6  -7   9 -36.796 52.1887   1
  -7 -14   2 126.935 59.5220  -2
   7  -7   9 126.935 59.5220   1
   9   3  18 16.5981 39.5527  -2
 -10  -6   9 16.5981 39.5527   1
   8   2  17 101.155 38.8244  -2
  -9  -6   9 101.155 38.8244   1
   7   1  16 63.8930 33.9957  -2
  -8  -6   9 63.8930 33.9957   1
   6   0  15 40.6233 31.9118  -2
  -7  -6   9 40.6233 31.9118   1
  -6  -6   9 224.765 16.0311   1
   5  -1  14 219.826 25.2288  -2
  -5  -6   9 219.826 25.2288   1
   4  -2  13 391.005 22.6980  -2
  -4  -6   9 391.005 22.6980   1
   3  -3  12 287.425 25.3522  -2
  -3  -6   9 287.425 25.3522   1
   2  -4  11 -36.665 17.6041  -2
  -2  -6   9 -36.665 17.6041   1
   1  -5  10 -3.3965 16.0894  -2
  -1  -6   9 -3.3965 16.0894   1
   0  -6   9 13.5220 19.1950  -2
   0  -6   9 13.5220 19.1950   1
  -1  -7   8 -0.7663 18.7583  -2
   1  -6   9 -0.7663 18.7583   1
  -2  -8   7 112.092 19.9509  -2
   2  -6   9 112.092 19.9509   1
  -3  -9   6 107.975 21.9246  -2
   3  -6   9 107.975 21.9246   1
  -4 -10   5 60.4550 21.4624  -2
   4  -6   9 60.4550 21.4624   1
  -5 -11   4 122.713 26.4662  -2
   5  -6   9 122.713 26.4662   1
  -6 -12   3 19.3882 30.2067  -2
   6  -6   9 19.3882 30.2067   1
  -7 -13   2 2.67703 52.7913  -2
   7  -6   9 2.67703 52.7913   1
  -8 -14   1 -76.318 135.656  -2
   8  -6   9 -76.318 135.656   1
   9   4  18 -18.154 46.2186  -2
 -10  -5   9 -18.154 46.2186   1
   8   3  17 217.696 40.7225  -2
  -9  -5   9 217.696 40.7225   1
   7   2  16 269.916 38.3534  -2
  -8  -5   9 269.916 38.3534   1
   6   1  15 49.0981 55.2590  -2
  -7  -5   9 49.0981 55.2590   1
   5   0  14 110.096 57.6277  -2
  -6  -5   9 110.096 57.6277   1
  -5  -5   9 20.0844 5.73762   1
   4  -1  13 122.809 20.3647  -2
  -4  -5   9 122.809 20.3647   1
   3  -2  12 109.742 16.7598  -2
  -3  -5   9 109.742 16.7598   1
   2  -3  11 167.766 17.6678  -2
  -2  -5   9 167.766 17.6678   1
   1  -4  10 420.914 21.9939  -2
  -1  -5   9 420.914 21.9939   1
   0  -5   9 1568.44 49.7335  -2
   0  -5   9 1568.44 49.7335   1
  -1  -6   8 554.015 29.6775  -2
   1  -5   9 554.015 29.6775   1
  -2  -7   7 619.793 31.5528  -2
   2  -5   9 619.793 31.5528   1
  -3  -8   6 26.0310 18.2344  -2
   3  -5   9 26.0310 18.2344   1
  -4  -9   5 50.2136 21.3188  -2
   4  -5   9 50.2136 21.3188   1
  -5 -10   4 279.269 27.1281  -2
   5  -5   9 279.269 27.1281   1
  -6 -11   3 109.788 25.2413  -2
   6  -5   9 109.788 25.2413   1
  -7 -12   2 -18.379 48.8541  -2
   7  -5   9 -18.379 48.8541   1
  -8 -13   1 -95.670 127.691  -2
   8  -5   9 -95.670 127.691   1
   9  14   0 -121.16 135.137  -2
   9  -5   9 -121.16 135.137   1
  10   6  19 7.98956 36.5194  -2
 -11  -4   9 7.98956 36.5194   1
   9   5  18 97.2658 33.7112  -2
 -10  -4   9 97.2658 33.7112   1
   8   4  17 18.6760 38.0834  -2
  -9  -4   9 18.6760 38.0834   1
   7   3  16 181.821 27.4092  -2
  -8  -4   9 181.821 27.4092   1
   6   2  15 318.413 38.2887  -2
  -7  -4   9 318.413 38.2887   1
   5   1  14 123.259 55.2720  -2
  -6  -4   9 123.259 55.2720   1
   4   0  13 645.488 72.3021  -2
  -5  -4   9 645.488 72.3021   1
  -4  -4   9 27.4766 4.97834   1
   3  -1  12 493.441 20.2911  -2
  -3  -4   9 493.441 20.2911   1
   2  -2  11 217.461 16.0601  -2
  -2  -4   9 217.461 16.0601   1
   1  -3  10 361.154 24.8371  -2
  -1  -4   9 361.154 24.8371   1
   0  -4   9 215.118 21.9588  -2
   0  -4   9 215.118 21.9588   1
  -1  -5   8 350.496 24.7565  -2
   1  -4   9 350.496 24.7565   1
  -2  -6   7 536.425 29.1698  -2
   2  -4   9 536.425 29.1698   1
  -3  -7   6 429.509 27.7951  -2
   3  -4   9 429.509 27.7951   1
  -4  -8   5 539.768 31.3149  -2
   4  -4   9 539.768 31.3149   1
  -5  -9   4 276.398 26.3437  -2
   5  -4   9 276.398 26.3437   1
  -6 -10   3 -37.780 13.3323  -2
   6  -4   9 -37.780 13.3323   1
  -7 -11   2 -37.273 26.8244  -2
   7  -4   9 -37.273 26.8244   1
  -8 -12   1 3.03099 31.8693  -2
   8  -4   9 3.03099 31.8693   1
   9  13   0 27.4189 46.1613  -2
   9  -4   9 27.4189 46.1613   1
  10  -4   9 -8.8291 26.9034   1
  10   7  19 30.5760 47.6870  -2
 -11  -3   9 30.5760 47.6870   1
   9   6  18 100.017 26.2514  -2
 -10  -3   9 100.017 26.2514   1
   8   5  17 -38.099 35.1168  -2
  -9  -3   9 -38.099 35.1168   1
   7   4  16 340.377 30.3445  -2
  -8  -3   9 340.377 30.3445   1
   6   3  15 74.2549 23.5617  -2
  -7  -3   9 74.2549 23.5617   1
   5   2  14 273.761 33.6271  -2
  -6  -3   9 273.761 33.6271   1
   4   1  13 306.178 57.7253  -2
  -5  -3   9 306.178 57.7253   1
  -4  -3   9 564.239 16.5058   1
   3   0  12 62.3706 37.7343  -2
  -3  -3   9 62.3706 37.7343   1
   2  -1  11 901.857 41.1629  -2
  -2  -3   9 901.857 41.1629   1
   1  -2  10 600.076 27.1571  -2
  -1  -3   9 600.076 27.1571   1
   0  -3   9 324.129 22.0156  -2
   0  -3   9 324.129 22.0156   1
  -1  -4   8 156.265 20.1201  -2
   1  -3   9 156.265 20.1201   1
  -2  -5   7 2.55676 17.9215  -2
   2  -3   9 2.55676 17.9215   1
  -3  -6   6 -32.383 17.9145  -2
   3  -3   9 -32.383 17.9145   1
  -4  -7   5 -4.4670 29.3449  -2
   4  -3   9 -4.4670 29.3449   1
  -5  -8   4 66.8599 21.0526  -2
   5  -3   9 66.8599 21.0526   1
  -6  -9   3 145.210 23.1066  -2
   6  -3   9 145.210 23.1066   1
  -7 -10   2 -99.090 105.171  -2
   7  -3   9 -99.090 105.171   1
  -8 -11   1 5.34160 28.3830  -2
   8  -3   9 5.34160 28.3830   1
   9  12   0 -13.878 42.0439  -2
   9  -3   9 -13.878 42.0439   1
  10  13   1 42.5312 46.9497  -2
  10  -3   9 42.5312 46.9497   1
  11  -3   9 -2.3262 18.5172   1
  10   8  19 205.995 44.6685  -2
 -11  -2   9 205.995 44.6685   1
   9   7  18 203.873 30.9353  -2
 -10  -2   9 203.873 30.9353   1
   8   6  17 232.224 32.1327  -2
  -9  -2   9 232.224 32.1327   1
   7   5  16 534.289 33.3016  -2
  -8  -2   9 534.289 33.3016   1
   6   4  15 842.047 30.5876  -2
  -7  -2   9 842.047 30.5876   1
   5   3  14 145.466 19.8583  -2
  -6  -2   9 145.466 19.8583   1
   4   2  13 169.987 54.1866  -2
  -5  -2   9 169.987 54.1866   1
  -4  -2   9 196.852 9.04972   1
  -3  -2   9 657.602 14.2098   1
   2   0  11 460.668 50.8954  -2
  -2  -2   9 460.668 50.8954   1
   1  -1  10 97.2139 21.5179  -2
  -1  -2   9 97.2139 21.5179   1
   0  -2   9 110.580 16.8081  -2
   0  -2   9 110.580 16.8081   1
  -1  -3   8 106.464 17.6205  -2
   1  -2   9 106.464 17.6205   1
  -2  -4   7 206.502 20.5079  -2
   2  -2   9 206.502 20.5079   1
  -3  -5   6 681.813 30.2563  -2
   3  -2   9 681.813 30.2563   1
  -4  -6   5 903.240 35.7552  -2
   4  -2   9 903.240 35.7552   1
  -5  -7   4 1848.99 55.5933  -2
   5  -2   9 1848.99 55.5933   1
  -6  -8   3 580.814 30.9673  -2
   6  -2   9 580.814 30.9673   1
  -7  -9   2 29.2597 21.5701  -2
   7  -2   9 29.2597 21.5701   1
  -8 -10   1 76.1184 23.4848  -2
   8  -2   9 76.1184 23.4848   1
   9  11   0 -33.786 38.0632  -2
   9  -2   9 -33.786 38.0632   1
  10  12   1 -26.136 44.1133  -2
  10  -2   9 -26.136 44.1133   1
  11  13   2 -88.659 128.769  -2
  11  -2   9 -88.659 128.769   1
   9   8  18 -25.788 30.9044  -2
 -10  -1   9 -25.788 30.9044   1
   8   7  17 118.345 27.2314  -2
  -9  -1   9 118.345 27.2314   1
   7   6  16 159.634 21.9528  -2
  -8  -1   9 159.634 21.9528   1
   6   5  15 246.567 21.4987  -2
  -7  -1   9 246.567 21.4987   1
   5   4  14 24.6197 17.2045  -2
  -6  -1   9 24.6197 17.2045   1
   4   3  13 -8.5438 46.8168  -2
  -5  -1   9 -8.5438 46.8168   1
   3   2  12 192.128 49.2730  -2
  -4  -1   9 192.128 49.2730   1
   2   1  11 -14.694 82.3360  -2
  -3  -1   9 -14.694 82.3360   1
  -2  -1   9 214.203 8.22367   1
  -1  -1   9 1556.76 33.0940   1
  -1  -2   8 3104.12 111.702  -2
   1  -1   9 3104.12 111.702   1
  -2  -3   7 694.559 27.7701  -2
   2  -1   9 694.559 27.7701   1
  -3  -4   6 398.301 23.3545  -2
   3  -1   9 398.301 23.3545   1
  -4  -5   5 110.455 19.2982  -2
   4  -1   9 110.455 19.2982   1
  -5  -6   4 839.497 34.1113  -2
   5  -1   9 839.497 34.1113   1
  -6  -7   3 274.683 24.1229  -2
   6  -1   9 274.683 24.1229   1
  -7  -8   2 -33.364 19.1170  -2
   7  -1   9 -33.364 19.1170   1
  -8  -9   1 127.047 26.1003  -2
   8  -1   9 127.047 26.1003   1
   9  10   0 -7.8926 29.6686  -2
   9  -1   9 -7.8926 29.6686   1
  10  11   1 97.2925 43.5578  -2
  10  -1   9 97.2925 43.5578   1
  11  12   2 -58.263 124.363  -2
  11  -1   9 -58.263 124.363   1
  12  -1   9 5.08554 20.4824   1
 -11   0   9 5.79595 47.0676   1
   9   9  18 -6.6130 78.3753  -2
 -10   0   9 -6.6130 78.3753   1
   8   8  17 56.1645 27.8943  -2
  -9   0   9 56.1645 27.8943   1
   7   7  16 8.75011 20.1935  -2
  -8   0   9 8.75011 20.1935   1
   6   6  15 124.968 20.1811  -2
  -7   0   9 124.968 20.1811   1
   5   5  14 257.738 20.0620  -2
  -6   0   9 257.738 20.0620   1
   4   4  13 175.061 18.7998  -2
  -5   0   9 175.061 18.7998   1
  -4   0   9 520.548 12.5586   1
  -3   0   9 671.761 13.9097   1
  -2   0   9 222.507 8.16351   1
  -1   0   9 330.477 12.8980   1
   0   0   9 1029.81 24.0706   1
   1   0   9 1009.70 26.0400   1
  -2  -2   7 375.894 23.3427  -2
   2   0   9 375.894 23.3427   1
  -3  -3   6 317.772 17.7693  -2
   3   0   9 317.772 17.7693   1
  -4  -4   5 143.896 18.0733  -2
   4   0   9 143.896 18.0733   1
  -5  -5   4 236.739 20.8634  -2
   5   0   9 236.739 20.8634   1
  -6  -6   3 353.532 24.1212  -2
   6   0   9 353.532 24.1212   1
  -7  -7   2 43.9388 20.5780  -2
   7   0   9 43.9388 20.5780   1
  -8  -8   1 68.7782 23.1431  -2
   8   0   9 68.7782 23.1431   1
   9   9   0 111.542 38.0975  -2
   9   0   9 111.542 38.0975   1
  10  10   1 -68.978 107.948  -2
  10   0   9 -68.978 107.948   1
  11  11   2 31.3383 121.388  -2
  11   0   9 31.3383 121.388   1
  12  12   3 -87.149 123.422  -2
  12   0   9 -87.149 123.422   1
   9  10  18 26.6781 86.2404  -2
 -10   1   9 26.6781 86.2404   1
   8   9  17 172.115 64.6960  -2
  -9   1   9 172.115 64.6960   1
   7   8  16 470.934 35.9580  -2
  -8   1   9 470.934 35.9580   1
   6   7  15 333.544 22.8783  -2
  -7   1   9 333.544 22.8783   1
   5   6  14 -5.1655 17.2709  -2
  -6   1   9 -5.1655 17.2709   1
   4   5  13 306.961 16.0113  -2
  -5   1   9 306.961 16.0113   1
   3   4  12 2561.14 94.5523  -2
  -4   1   9 2561.14 94.5523   1
  -3   1   9 213.133 9.23578   1
   1   2  10 11.1296 78.9849  -2
  -2   1   9 11.1296 78.9849   1
  -1   1   9 59.7402 13.1072   1
   0   1   9 44.3904 5.22625   1
   1   1   9 1202.45 27.4559   1
   2   1   9 538.217 17.7053   1
   3   1   9 -2.6844 7.13410   1
  -4  -3   5 451.615 24.2952  -2
   4   1   9 451.615 24.2952   1
  -5  -4   4 -9.3605 16.6379  -2
   5   1   9 -9.3605 16.6379   1
  -6  -5   3 192.472 27.9611  -2
   6   1   9 192.472 27.9611   1
  -7  -6   2 501.855 27.5773  -2
   7   1   9 501.855 27.5773   1
  -8  -7   1 427.102 28.2130  -2
   8   1   9 427.102 28.2130   1
  10   9   1 275.098 37.7483  -2
  10   1   9 275.098 37.7483   1
  12  11   3 -20.172 120.812  -2
  12   1   9 -20.172 120.812   1
  13   1   9 -2.5884 17.1477   1
   9  11  18 12.8257 94.9578  -2
 -10   2   9 12.8257 94.9578   1
   8  10  17 255.886 94.0086  -2
  -9   2   9 255.886 94.0086   1
   7   9  16 139.584 57.8777  -2
  -8   2   9 139.584 57.8777   1
   6   8  15 238.108 32.6561  -2
  -7   2   9 238.108 32.6561   1
   5   7  14 474.527 32.3424  -2
  -6   2   9 474.527 32.3424   1
   4   6  13 45.2635 20.6358  -2
  -5   2   9 45.2635 20.6358   1
  -4   2   9 -0.0125 3.19802   1
  -3   2   9 507.701 13.0049   1
  -2   2   9 41.4886 4.52649   1
  -1   2   9 22.0735 4.35833   1
   0   2   9 392.913 11.1978   1
   1   2   9 1.83819 4.17629   1
   3   2   9 1724.30 38.1085   1
  -4  -2   5 1687.92 68.4280  -2
   4   2   9 1687.92 68.4280   1
  -5  -3   4 1711.95 48.9661  -2
   5   2   9 1711.95 48.9661   1
  -6  -4   3 515.842 25.7809  -2
   6   2   9 515.842 25.7809   1
  -7  -5   2 286.032 18.6842  -2
   7   2   9 286.032 18.6842   1
  -8  -6   1 455.672 28.6018  -2
   8   2   9 455.672 28.6018   1
   9   7   0 136.419 40.4748  -2
   9   2   9 136.419 40.4748   1
  13  11   4 -0.2051 118.056  -2
  13   2   9 -0.2051 118.056   1
   9  12  18 73.0177 104.667  -2
 -10   3   9 73.0177 104.667   1
   7  10  16 -12.140 74.9207  -2
  -8   3   9 -12.140 74.9207   1
   6   9  15 43.4690 22.5733  -2
  -7   3   9 43.4690 22.5733   1
   5   8  14 52.2163 26.0143  -2
  -6   3   9 52.2163 26.0143   1
   4   7  13 93.5734 23.0828  -2
  -5   3   9 93.5734 23.0828   1
  -4   3   9 95.7686 11.2954   1
  -3   3   9 58.3206 8.00440   1
  -2   3   9 3.69963 4.40805   1
   0   3   9 75.8390 55.2401  -2
  -1   3   9 75.8390 55.2401   1
   0   3   9 186.963 10.1206   1
   1   3   9 1276.26 29.1380   1
   2   3   9 1820.57 38.3915   1
   3   3   9 1589.08 35.2875   1
   4   3   9 99.7846 10.4488   1
  -5  -2   4 47.2284 23.8540  -2
   5   3   9 47.2284 23.8540   1
  -6  -3   3 560.037 27.2546  -2
   6   3   9 560.037 27.2546   1
  -7  -4   2 -2.9373 16.5475  -2
   7   3   9 -2.9373 16.5475   1
  -8  -5   1 40.1177 15.6725  -2
   8   3   9 40.1177 15.6725   1
   9   6   0 135.391 33.6193  -2
   9   3   9 135.391 33.6193   1
   6  10  15 18.2232 51.7842  -2
  -7   4   9 18.2232 51.7842   1
   5   9  14 109.481 25.5720  -2
  -6   4   9 109.481 25.5720   1
   4   8  13 72.5458 37.0050  -2
  -5   4   9 72.5458 37.0050   1
  -4   4   9 455.703 22.3785   1
  -3   4   9 1310.04 37.8559   1
  -2   4   9 990.276 30.3382   1
  -1   4   9 2.92170 4.49206   1
   0   4   9 904.338 30.7301   1
   1   4   9 103.936 8.88227   1
   2   4   9 193.943 10.5626   1
   3   4   9 9.09461 3.77032   1
   4   4   9 1.47753 3.62219   1
   5   4   9 193.567 12.5517   1
   6   4   9 312.702 13.7601   1
   7   4   9 23.3801 5.53132   1
  -8  -4   1 14.1084 81.2499  -2
   8   4   9 14.1084 81.2499   1
   9   5   0 39.8795 37.6996  -2
   9   4   9 39.8795 37.6996   1
  10   6   1 137.182 39.7722  -2
  10   4   9 137.182 39.7722   1
  11   7   2 240.217 39.9257  -2
  11   4   9 240.217 39.9257   1
  14   4   9 222.728 41.2621   1
   5  10  14 135.969 52.9983  -2
  -6   5   9 135.969 52.9983   1
   4   9  13 655.744 68.0011  -2
  -5   5   9 655.744 68.0011   1
  -4   5   9 205.025 17.9459   1
  -3   5   9 9.40906 6.16823   1
  -2   5   9 298.621 17.4483   1
  -1   5   9 17.7527 6.02351   1
   0   5   9 148.691 14.7335   1
   1   5   9 113.195 13.1846   1
   2   5   9 23.7890 5.54740   1
   3   5   9 1.12736 3.98608   1
   4   5   9 123.591 10.5488   1
   5   5   9 206.711 12.8128   1
   6   5   9 218.524 14.2923   1
   7   5   9 98.9296 10.6470   1
   8   5   9 147.564 12.2730   1
   9   4   0 9.86207 86.2356  -2
   9   5   9 9.86207 86.2356   1
  10   5   1 211.772 48.2866  -2
  10   5   9 211.772 48.2866   1
  10   5   0 121.960 40.3608  -2
  10   5   9 121.960 40.3608   1
  11   6   2 95.9802 40.6981  -2
  11   5   9 95.9802 40.6981   1
  14   9   4 162.425 50.2429  -2
  14   5   9 162.425 50.2429   1
  -7   6   9 98.1715 49.1742   1
  -6   6   9 134.944 56.2192   1
   4  10  13 161.634 53.5613  -2
  -5   6   9 161.634 53.5613   1
   3   9  12 1.79874 40.3132  -2
  -4   6   9 1.79874 40.3132   1
  -3   6   9 251.430 19.7634   1
  -2   6   9 360.433 23.4097   1
  -1   6   9 48.4411 11.1902   1
   0   6   9 247.919 18.6516   1
   1   6   9 274.093 18.0550   1
   2   6   9 18.6675 5.53618   1
   3   6   9 1.38653 4.76756   1
   4   6   9 277.532 13.7017   1
   5   6   9 69.8633 11.0004   1
   6   6   9 345.910 17.0854   1
   7   6   9 611.574 22.6565   1
   8   6   9 175.347 16.2069   1
   9   6   9 19.4874 6.19112   1
  10   4   1 59.5859 83.2645  -2
  10   6   9 59.5859 83.2645   1
  11   5   2 18.3282 47.8568  -2
  11   6   9 18.3282 47.8568   1
  -5   7   9 30.2346 16.8161   1
   2  10  12 88.0189 33.0262  -2
  -4   7   9 88.0189 33.0262   1
  -3   7   9 187.352 21.5743   1
  -2   7   9 107.656 18.7824   1
  -1   7   9 167.236 18.8272   1
   0   7   9 13.4498 6.33960   1
   1   7   9 639.146 27.8270   1
   2   7   9 1304.17 42.0907   1
   3   7   9 1175.39 39.1922   1
   4   7   9 85.7993 10.7333   1
   5   7   9 10.9417 5.15510   1
   6   7   9 64.2525 11.3809   1
   7   7   9 61.8428 9.09008   1
   8   7   9 7.53759 6.74223   1
   9   7   9 118.586 12.3326   1
  10   7   9 89.1751 17.4764   1
  11   7   9 -8.7809 10.4038   1
   3  12  13 138.135 41.9400  -2
  -5   8   9 138.135 41.9400   1
   2  11  12 14.4264 34.3278  -2
  -4   8   9 14.4264 34.3278   1
   1  10  11 348.311 40.1065  -2
  -3   8   9 348.311 40.1065   1
  -2   8   9 60.4584 14.5744   1
  -1   8   9 61.9337 13.8337   1
   0   8   9 136.166 18.7795   1
   1   8   9 157.399 18.2908   1
   2   8   9 -3.9326 5.41409   1
   3   8   9 -0.6743 5.89715   1
   4   8   9 10.2316 6.46259   1
   5   8   9 82.8134 12.2019   1
   6   8   9 37.8672 7.12368   1
   7   8   9 79.7534 10.0648   1
   8   8   9 113.101 16.2416   1
   9   8   9 15.0781 7.67519   1
  10   8   9 246.596 28.2170   1
  11   8   9 354.554 32.5461   1
   3  13  13 296.711 50.3319  -2
  -5   9   9 296.711 50.3319   1
   2  12  12 170.706 32.9251  -2
  -4   9   9 170.706 32.9251   1
   1  11  11 14.5634 35.0543  -2
  -3   9   9 14.5634 35.0543   1
   0  10  10 80.0111 31.1484  -2
  -2   9   9 80.0111 31.1484   1
  -1   9   9 393.178 26.9725   1
   0   9   9 104.982 15.4518   1
   1   9   9 611.166 30.2496   1
   2   9   9 380.038 24.8549   1
   3   9   9 263.990 22.1541   1
   4   9   9 12.8842 7.15000   1
   5   9   9 73.7520 10.3738   1
   6   9   9 552.632 22.6981   1
   7   9   9 112.252 18.0493   1
   8   9   9 200.230 18.8251   1
   9   9   9 7.19022 8.04878   1
  10   9   9 -2.6221 11.3196   1
  11   9   9 4.80265 18.6279   1
  12   9   9 60.6679 22.4661   1
  13   9   9 -13.271 20.7691   1
   3  14  13 84.7991 45.7570  -2
  -5  10   9 84.7991 45.7570   1
   2  13  12 -29.835 31.1821  -2
  -4  10   9 -29.835 31.1821   1
   1  12  11 27.0857 30.7767  -2
  -3  10   9 27.0857 30.7767   1
   0  11  10 18.1908 32.9438  -2
  -2  10   9 18.1908 32.9438   1
  -1  10   9 26.5832 29.7764  -2
  -1  10   9 26.5832 29.7764   1
  -2   9   8 102.886 32.9128  -2
   0  10   9 102.886 32.9128   1
   1  10   9 226.959 23.0517   1
   2  10   9 83.4972 14.7631   1
   3  10   9 129.863 20.2498   1
  -5   6   5 370.851 45.8842  -2
   4  10   9 370.851 45.8842   1
  -6   5   4 111.608 27.9166  -2
   5  10   9 111.608 27.9166   1
  -7   4   3 220.036 29.6751  -2
   6  10   9 220.036 29.6751   1
  -8   3   2 385.960 34.6381  -2
   7  10   9 385.960 34.6381   1
   8  10   9 231.353 19.7294   1
   9  10   9 4.64312 9.56798   1
  10  10   9 -10.572 14.2479   1
  11  10   9 -22.866 17.9392   1
  14  10   9 51.4448 22.5971   1
  -5  11   9 124.443 39.3980   1
   2  14  12 43.2284 34.1872  -2
  -4  11   9 43.2284 34.1872   1
   1  13  11 -8.4041 32.4356  -2
  -3  11   9 -8.4041 32.4356   1
   0  12  10 377.838 37.8772  -2
  -2  11   9 377.838 37.8772   1
  -1  11   9 1178.29 68.6788  -2
  -1  11   9 1178.29 68.6788   1
  -2  10   8 291.884 42.2628  -2
   0  11   9 291.884 42.2628   1
  -3   9   7 -2.9833 31.2894  -2
   1  11   9 -2.9833 31.2894   1
   2  11   9 33.1879 9.59731   1
  -4   8   6 170.319 41.2733  -2
   3  11   9 170.319 41.2733   1
  -5   7   5 -40.710 28.2591  -2
   4  11   9 -40.710 28.2591   1
  -6   6   4 23.9523 27.9803  -2
   5  11   9 23.9523 27.9803   1
  -7   5   3 122.558 29.6305  -2
   6  11   9 122.558 29.6305   1
  -8   4   2 88.4411 30.9315  -2
   7  11   9 88.4411 30.9315   1
  -9   3   1 -35.358 27.9820  -2
   8  11   9 -35.358 27.9820   1
  10  11   9 -4.7976 15.3190   1
  11  11   9 -9.4833 19.2863   1
  12  11   9 12.0360 23.1132   1
   1  14  11 98.6079 35.4035  -2
  -3  12   9 98.6079 35.4035   1
   0  13  10 101.611 33.6940  -2
  -2  12   9 101.611 33.6940   1
  -1  12   9 431.772 40.0712  -2
  -1  12   9 431.772 40.0712   1
  -2  11   8 262.254 45.5335  -2
   0  12   9 262.254 45.5335   1
  -3  10   7 174.358 41.9775  -2
   1  12   9 174.358 41.9775   1
   2  12   9 -0.5734 15.4802   1
   3  12   9 16.4470 17.5797   1
  -5   8   5 -50.666 45.8508  -2
   4  12   9 -50.666 45.8508   1
  -6   7   4 98.5114 31.2453  -2
   5  12   9 98.5114 31.2453   1
  -7   6   3 142.256 32.7388  -2
   6  12   9 142.256 32.7388   1
  -8   5   2 757.763 44.9942  -2
   7  12   9 757.763 44.9942   1
  -9   4   1 382.974 37.9507  -2
   8  12   9 382.974 37.9507   1
   0  14  10 9.85737 34.1532  -2
  -2  13   9 9.85737 34.1532   1
  -1  13   9 5.94342 33.0957  -2
  -1  13   9 5.94342 33.0957   1
  -2  12   8 4.14752 33.7449  -2
   0  13   9 4.14752 33.7449   1
  -3  11   7 44.8803 41.4882  -2
   1  13   9 44.8803 41.4882   1
   2  13   9 166.493 41.2789   1
   3  13   9 53.7537 20.5896   1
  -5   9   5 71.3353 55.3089  -2
   4  13   9 71.3353 55.3089   1
  -6   8   4 170.378 35.1470  -2
   5  13   9 170.378 35.1470   1
  -7   7   3 108.187 34.5824  -2
   6  13   9 108.187 34.5824   1
  -8   6   2 -50.841 44.4369  -2
   7  13   9 -50.841 44.4369   1
  -9   5   1 32.2162 44.0074  -2
   8  13   9 32.2162 44.0074   1
  -2  13   8 292.882 66.4166  -2
   0  14   9 292.882 66.4166   1
  -3  12   7 172.842 63.0000  -2
   1  14   9 172.842 63.0000   1
   2  14   9 20.3851 19.2402   1
   3  14   9 165.625 39.9389   1
  -5  10   5 467.087 68.3860  -2
   4  14   9 467.087 68.3860   1
  -6   9   4 262.930 61.6590  -2
   5  14   9 262.930 61.6590   1
  -7   8   3 27.0980 53.1666  -2
   6  14   9 27.0980 53.1666   1
  -8   7   2 -17.235 48.5240  -2
   7  14   9 -17.235 48.5240   1
  -9   6   1 -3.3809 46.6661  -2
   8  14   9 -3.3809 46.6661   1
   2  15   9 19.7838 20.0716   1
   3  15   9 -3.1024 18.6455   1
   4  15   9 26.6770 21.6382   1
  -6  10   4 68.5094 62.8727  -2
   5  15   9 68.5094 62.8727   1
  -7   9   3 72.3953 38.3351  -2
   6  15   9 72.3953 38.3351   1
  -8   8   2 39.8909 37.3603  -2
   7  15   9 39.8909 37.3603   1
  -9   7   1 -43.416 36.8020  -2
   8  15   9 -43.416 36.8020   1
 -10   6   0 10.7304 56.5346  -2
   9  15   9 10.7304 56.5346   1
  10  15   9 -22.967 18.1481   1
   6  16   9 27.4041 13.4724   1
   5  -5  15 -0.1950 27.8996  -2
  -5 -10  10 -0.1950 27.8996   1
   4  -6  14 28.0455 20.3552  -2
  -4 -10  10 28.0455 20.3552   1
   3  -7  13 26.2930 19.2779  -2
  -3 -10  10 26.2930 19.2779   1
   2  -8  12 108.202 19.8547  -2
  -2 -10  10 108.202 19.8547   1
   1  -9  11 167.524 20.7204  -2
  -1 -10  10 167.524 20.7204   1
   0 -10  10 239.984 21.9116  -2
   0 -10  10 239.984 21.9116   1
  -1 -11   9 40.1475 18.9523  -2
   1 -10  10 40.1475 18.9523   1
  -7  -9  10 100.231 19.8458   1
   6  -3  16 169.781 29.2062  -2
  -6  -9  10 169.781 29.2062   1
   5  -4  15 252.288 31.2895  -2
  -5  -9  10 252.288 31.2895   1
   4  -5  14 181.047 22.0939  -2
  -4  -9  10 181.047 22.0939   1
   3  -6  13 275.517 23.3211  -2
  -3  -9  10 275.517 23.3211   1
   2  -7  12 54.2379 18.8808  -2
  -2  -9  10 54.2379 18.8808   1
   1  -8  11 8.75267 16.8254  -2
  -1  -9  10 8.75267 16.8254   1
   0  -9  10 12.2704 16.7588  -2
   0  -9  10 12.2704 16.7588   1
  -1 -10   9 -12.907 11.1371  -2
   1  -9  10 -12.907 11.1371   1
  -2 -11   8 -19.346 22.9193  -2
   2  -9  10 -19.346 22.9193   1
  -3 -12   7 38.3080 48.2632  -2
   3  -9  10 38.3080 48.2632   1
   7  -1  17 47.7708 68.8021  -2
  -8  -8  10 47.7708 68.8021   1
   6  -2  16 87.6025 74.9113  -2
  -7  -8  10 87.6025 74.9113   1
   6  -2  16 -1.5590 27.8048  -2
  -6  -8  10 -1.5590 27.8048   1
   5  -3  15 264.739 28.1104  -2
  -5  -8  10 264.739 28.1104   1
   4  -4  14 148.905 23.5461  -2
  -4  -8  10 148.905 23.5461   1
   3  -5  13 33.5580 22.5679  -2
  -3  -8  10 33.5580 22.5679   1
   2  -6  12 132.784 20.6896  -2
  -2  -8  10 132.784 20.6896   1
   1  -7  11 81.9149 16.4186  -2
  -1  -8  10 81.9149 16.4186   1
   0  -8  10 69.4385 16.0573  -2
   0  -8  10 69.4385 16.0573   1
  -1  -9   9 12.7165 16.9236  -2
   1  -8  10 12.7165 16.9236   1
  -2 -10   8 21.9101 16.7086  -2
   2  -8  10 21.9101 16.7086   1
  -3 -11   7 54.4703 24.1481  -2
   3  -8  10 54.4703 24.1481   1
  -4 -12   6 20.4628 27.2612  -2
   4  -8  10 20.4628 27.2612   1
  -5 -13   5 -55.723 52.7089  -2
   5  -8  10 -55.723 52.7089   1
   8   1  18 90.2266 38.2132  -2
  -9  -7  10 90.2266 38.2132   1
   7   0  17 86.6302 37.7551  -2
  -8  -7  10 86.6302 37.7551   1
   6  -1  16 -21.524 58.5108  -2
  -7  -7  10 -21.524 58.5108   1
   6  -1  16 35.1948 37.1641  -2
  -6  -7  10 35.1948 37.1641   1
   5  -2  15 17.0891 24.2745  -2
  -5  -7  10 17.0891 24.2745   1
   4  -3  14 36.2104 23.7654  -2
  -4  -7  10 36.2104 23.7654   1
   3  -4  13 -19.130 21.6708  -2
  -3  -7  10 -19.130 21.6708   1
   2  -5  12 6.64697 21.1154  -2
  -2  -7  10 6.64697 21.1154   1
   1  -6  11 60.3333 18.1754  -2
  -1  -7  10 60.3333 18.1754   1
   0  -7  10 23.3941 17.4458  -2
   0  -7  10 23.3941 17.4458   1
  -1  -8   9 35.3912 21.7546  -2
   1  -7  10 35.3912 21.7546   1
  -2  -9   8 174.286 25.0225  -2
   2  -7  10 174.286 25.0225   1
  -3 -10   7 315.960 28.7136  -2
   3  -7  10 315.960 28.7136   1
  -4 -11   6 245.297 28.5436  -2
   4  -7  10 245.297 28.5436   1
  -5 -12   5 56.7103 28.1245  -2
   5  -7  10 56.7103 28.1245   1
  -6 -13   4 -48.414 54.8372  -2
   6  -7  10 -48.414 54.8372   1
   8   2  18 18.4444 36.7930  -2
  -9  -6  10 18.4444 36.7930   1
   7   1  17 31.6563 33.1660  -2
  -8  -6  10 31.6563 33.1660   1
   6   0  16 26.5538 31.7742  -2
  -7  -6  10 26.5538 31.7742   1
   5  -1  15 -40.778 56.6227  -2
  -6  -6  10 -40.778 56.6227   1
   5  -1  15 24.6527 22.7299  -2
  -5  -6  10 24.6527 22.7299   1
   4  -2  14 -33.391 20.8242  -2
  -4  -6  10 -33.391 20.8242   1
   3  -3  13 29.7837 19.3750  -2
  -3  -6  10 29.7837 19.3750   1
   2  -4  12 595.095 27.3497  -2
  -2  -6  10 595.095 27.3497   1
   1  -5  11 1026.37 33.6689  -2
  -1  -6  10 1026.37 33.6689   1
   0  -6  10 757.611 52.9300  -2
   0  -6  10 757.611 52.9300   1
  -1  -7   9 884.617 39.8879  -2
   1  -6  10 884.617 39.8879   1
  -2  -8   8 337.208 27.9024  -2
   2  -6  10 337.208 27.9024   1
  -3  -9   7 13.3764 19.4150  -2
   3  -6  10 13.3764 19.4150   1
  -4 -10   6 5.04871 26.9153  -2
   4  -6  10 5.04871 26.9153   1
  -5 -11   5 7.81830 15.7460  -2
   5  -6  10 7.81830 15.7460   1
  -6 -12   4 -50.539 28.3711  -2
   6  -6  10 -50.539 28.3711   1
  -7 -13   3 -22.952 54.1738  -2
   7  -6  10 -22.952 54.1738   1
   8  -6  10 -35.728 20.5042   1
   9   4  19 13.5085 32.3768  -2
 -10  -5  10 13.5085 32.3768   1
   8   3  18 57.2555 38.1815  -2
  -9  -5  10 57.2555 38.1815   1
   7   2  17 -2.7701 33.5117  -2
  -8  -5  10 -2.7701 33.5117   1
   6   1  16 63.0033 32.7482  -2
  -7  -5  10 63.0033 32.7482   1
   5   0  15 145.138 55.9694  -2
  -6  -5  10 145.138 55.9694   1
   4  -1  14 432.387 69.3976  -2
  -5  -5  10 432.387 69.3976   1
   4  -1  14 439.370 40.0846  -2
  -4  -5  10 439.370 40.0846   1
   3  -2  13 806.447 29.5765  -2
  -3  -5  10 806.447 29.5765   1
   2  -3  12 110.952 18.8422  -2
  -2  -5  10 110.952 18.8422   1
   1  -4  11 90.7190 19.6019  -2
  -1  -5  10 90.7190 19.6019   1
   0  -5  10 313.701 28.0978  -2
   0  -5  10 313.701 28.0978   1
  -1  -6   9 11.0495 19.3307  -2
   1  -5  10 11.0495 19.3307   1
  -2  -7   8 14.7528 19.8058  -2
   2  -5  10 14.7528 19.8058   1
  -3  -8   7 88.1500 21.9590  -2
   3  -5  10 88.1500 21.9590   1
  -4  -9   6 -13.285 29.3943  -2
   4  -5  10 -13.285 29.3943   1
  -5 -10   5 29.4167 22.2558  -2
   5  -5  10 29.4167 22.2558   1
  -6 -11   4 9.49775 16.3366  -2
   6  -5  10 9.49775 16.3366   1
  -7 -12   3 44.6626 27.3302  -2
   7  -5  10 44.6626 27.3302   1
  -8 -13   2 74.6315 36.4223  -2
   8  -5  10 74.6315 36.4223   1
   9  -5  10 -16.914 71.9557   1
   9   5  19 -32.063 30.3518  -2
 -10  -4  10 -32.063 30.3518   1
   8   4  18 180.649 32.0608  -2
  -9  -4  10 180.649 32.0608   1
   7   3  17 342.931 29.8830  -2
  -8  -4  10 342.931 29.8830   1
   6   2  16 101.627 33.3203  -2
  -7  -4  10 101.627 33.3203   1
   5   1  15 257.731 36.0117  -2
  -6  -4  10 257.731 36.0117   1
   4   0  14 -13.483 119.403  -2
  -5  -4  10 -13.483 119.403   1
  -4  -4  10 481.986 17.3504   1
   3  -1  13 131.737 30.6055  -2
  -3  -4  10 131.737 30.6055   1
   2  -2  12 85.4906 15.9644  -2
  -2  -4  10 85.4906 15.9644   1
   1  -3  11 245.783 19.5147  -2
  -1  -4  10 245.783 19.5147   1
   0  -4  10 91.4781 20.7782  -2
   0  -4  10 91.4781 20.7782   1
  -1  -5   9 474.598 28.1788  -2
   1  -4  10 474.598 28.1788   1
  -2  -6   8 340.100 28.2404  -2
   2  -4  10 340.100 28.2404   1
  -3  -7   7 33.8625 23.0280  -2
   3  -4  10 33.8625 23.0280   1
  -4  -8   6 102.706 23.7969  -2
   4  -4  10 102.706 23.7969   1
  -5  -9   5 207.572 27.3978  -2
   5  -4  10 207.572 27.3978   1
  -6 -10   4 112.454 25.0254  -2
   6  -4  10 112.454 25.0254   1
  -7 -11   3 24.1855 16.7412  -2
   7  -4  10 24.1855 16.7412   1
  -8 -12   2 -55.528 39.8768  -2
   8  -4  10 -55.528 39.8768   1
  -9 -13   1 -32.862 134.577  -2
   9  -4  10 -32.862 134.577   1
   9   6  19 67.3885 40.7285  -2
 -10  -3  10 67.3885 40.7285   1
   8   5  18 55.3623 30.6530  -2
  -9  -3  10 55.3623 30.6530   1
   7   4  17 237.762 28.8027  -2
  -8  -3  10 237.762 28.8027   1
   6   3  16 252.965 26.7164  -2
  -7  -3  10 252.965 26.7164   1
   5   2  15 12.4695 23.6102  -2
  -6  -3  10 12.4695 23.6102   1
   4   1  14 -12.449 27.1742  -2
  -5  -3  10 -12.449 27.1742   1
   3   0  13 162.029 51.6696  -2
  -4  -3  10 162.029 51.6696   1
  -3  -3  10 46.5100 7.40727   1
   2  -1  12 123.692 45.5944  -2
  -2  -3  10 123.692 45.5944   1
   1  -2  11 67.5301 18.3736  -2
  -1  -3  10 67.5301 18.3736   1
   0  -3  10 379.414 25.0473  -2
   0  -3  10 379.414 25.0473   1
  -2  -5   8 447.733 28.4367  -2
   2  -3  10 447.733 28.4367   1
  -3  -6   7 768.737 35.1109  -2
   3  -3  10 768.737 35.1109   1
  -4  -7   6 1166.59 44.2452  -2
   4  -3  10 1166.59 44.2452   1
  -5  -8   5 1047.52 43.0124  -2
   5  -3  10 1047.52 43.0124   1
  -6  -9   4 21.3574 23.8666  -2
   6  -3  10 21.3574 23.8666   1
  -7 -10   3 -19.214 22.4987  -2
   7  -3  10 -19.214 22.4987   1
  -8 -11   2 50.2383 25.4145  -2
   8  -3  10 50.2383 25.4145   1
  -9 -12   1 -60.354 39.3242  -2
   9  -3  10 -60.354 39.3242   1
  10  13   0 -18.098 44.4376  -2
  10  -3  10 -18.098 44.4376   1
   9   7  19 -4.2347 33.3156  -2
 -10  -2  10 -4.2347 33.3156   1
   8   6  18 -13.931 35.9257  -2
  -9  -2  10 -13.931 35.9257   1
   7   5  17 33.9886 21.6475  -2
  -8  -2  10 33.9886 21.6475   1
   6   4  16 43.0857 29.8799  -2
  -7  -2  10 43.0857 29.8799   1
   5   3  15 -16.411 21.0651  -2
  -6  -2  10 -16.411 21.0651   1
   4   2  14 279.535 61.0794  -2
  -5  -2  10 279.535 61.0794   1
  -4  -2  10 542.443 15.6005   1
  -3  -2  10 10.7717 3.87453   1
   2   0  12 579.639 59.1139  -2
  -2  -2  10 579.639 59.1139   1
   1  -1  11 738.907 62.9670  -2
  -1  -2  10 738.907 62.9670   1
   0  -2  10 120.395 17.2811  -2
   0  -2  10 120.395 17.2811   1
  -1  -3   9 532.389 27.6252  -2
   1  -2  10 532.389 27.6252   1
  -2  -4   8 556.438 28.7124  -2
   2  -2  10 556.438 28.7124   1
  -3  -5   7 176.592 22.8406  -2
   3  -2  10 176.592 22.8406   1
  -4  -6   6 -1.3983 21.9681  -2
   4  -2  10 -1.3983 21.9681   1
  -5  -7   5 22.9173 21.6741  -2
   5  -2  10 22.9173 21.6741   1
  -6  -8   4 29.6966 21.8896  -2
   6  -2  10 29.6966 21.8896   1
  -7  -9   3 106.884 25.4977  -2
   7  -2  10 106.884 25.4977   1
  -8 -10   2 -2.8549 25.8851  -2
   8  -2  10 -2.8549 25.8851   1
  -9 -11   1 -4.2624 29.0051  -2
   9  -2  10 -4.2624 29.0051   1
  10  12   0 121.698 46.0072  -2
  10  -2  10 121.698 46.0072   1
  11  13   1 -2.6127 46.2663  -2
  11  -2  10 -2.6127 46.2663   1
   9   8  19 47.4460 40.0431  -2
 -10  -1  10 47.4460 40.0431   1
   8   7  18 42.4274 25.6291  -2
  -9  -1  10 42.4274 25.6291   1
   7   6  17 55.9118 21.1415  -2
  -8  -1  10 55.9118 21.1415   1
   6   5  16 203.295 19.7264  -2
  -7  -1  10 203.295 19.7264   1
   5   4  15 281.757 26.7921  -2
  -6  -1  10 281.757 26.7921   1
   4   3  14 39.5212 17.8269  -2
  -5  -1  10 39.5212 17.8269   1
  -4  -1  10 652.124 15.2241   1
   2   1  12 -24.547 94.7624  -2
  -3  -1  10 -24.547 94.7624   1
  -2  -1  10 757.713 18.5600   1
  -1  -1  10 63.2175 14.4516   1
   0  -1  10 389.830 16.4686   1
  -1  -2   9 153.391 29.3602  -2
   1  -1  10 153.391 29.3602   1
  -2  -3   8 6.04403 16.8610  -2
   2  -1  10 6.04403 16.8610   1
  -4  -5   6 171.143 22.6229  -2
   4  -1  10 171.143 22.6229   1
  -5  -6   5 1480.05 48.3147  -2
   5  -1  10 1480.05 48.3147   1
  -6  -7   4 822.303 36.6792  -2
   6  -1  10 822.303 36.6792   1
  -7  -8   3 205.334 26.1743  -2
   7  -1  10 205.334 26.1743   1
  -8  -9   2 250.146 29.0074  -2
   8  -1  10 250.146 29.0074   1
  10  11   0 -100.03 114.144  -2
  10  -1  10 -100.03 114.144   1
   8   8  18 168.423 42.9626  -2
  -9   0  10 168.423 42.9626   1
   7   7  17 443.412 28.5130  -2
  -8   0  10 443.412 28.5130   1
   6   6  16 644.113 28.5812  -2
  -7   0  10 644.113 28.5812   1
   5   5  15 442.240 29.1231  -2
  -6   0  10 442.240 29.1231   1
   4   4  14 -4.0682 15.1984  -2
  -5   0  10 -4.0682 15.1984   1
   3   3  13 502.137 24.0429  -2
  -4   0  10 502.137 24.0429   1
  -3   0  10 34.9569 3.61099   1
  -2   0  10 64.5763 6.00181   1
  -1   0  10 600.069 17.7815   1
   1   0  10 1645.36 126.045   1
   2   0  10 734.835 22.6332   1
  -3  -3   7 4.61831 14.8401  -2
   3   0  10 4.61831 14.8401   1
  -4  -4   6 340.306 23.1443  -2
   4   0  10 340.306 23.1443   1
  -5  -5   5 779.395 33.5551  -2
   5   0  10 779.395 33.5551   1
  -6  -6   4 268.699 25.0632  -2
   6   0  10 268.699 25.0632   1
  -7  -7   3 -0.5737 22.2181  -2
   7   0  10 -0.5737 22.2181   1
  -8  -8   2 269.152 39.0802  -2
   8   0  10 269.152 39.0802   1
  -9  -9   1 14.3324 83.0272  -2
   9   0  10 14.3324 83.0272   1
  10  10   0 -33.590 105.051  -2
  10   0  10 -33.590 105.051   1
  11  11   1 -27.513 118.312  -2
  11   0  10 -27.513 118.312   1
  12  12   2 -41.300 127.066  -2
  12   0  10 -41.300 127.066   1
   9  10  19 59.2940 89.4664  -2
 -10   1  10 59.2940 89.4664   1
   7   8  17 343.886 30.5793  -2
  -8   1  10 343.886 30.5793   1
   6   7  16 365.683 25.8710  -2
  -7   1  10 365.683 25.8710   1
   5   6  15 60.7229 23.8280  -2
  -6   1  10 60.7229 23.8280   1
   4   5  14 78.9182 16.4480  -2
  -5   1  10 78.9182 16.4480   1
   3   4  13 116.394 25.8437  -2
  -4   1  10 116.394 25.8437   1
   2   3  12 7.36385 90.8524  -2
  -3   1  10 7.36385 90.8524   1
   1   2  11 84.2611 91.2629  -2
  -2   1  10 84.2611 91.2629   1
   0   1  10 1369.49 29.8153   1
   1   1  10 661.690 19.3192   1
  -3  -2   7 1239.46 57.3752  -2
   3   1  10 1239.46 57.3752   1
  -4  -3   6 812.547 33.1816  -2
   4   1  10 812.547 33.1816   1
  -5  -4   5 231.193 22.7543  -2
   5   1  10 231.193 22.7543   1
  -6  -5   4 13.6660 19.6845  -2
   6   1  10 13.6660 19.6845   1
  -7  -6   3 168.113 23.5754  -2
   7   1  10 168.113 23.5754   1
  -8  -7   2 51.3169 23.8105  -2
   8   1  10 51.3169 23.8105   1
  12  11   2 20.7558 121.443  -2
  12   1  10 20.7558 121.443   1
   9  11  19 131.637 101.817  -2
 -10   2  10 131.637 101.817   1
   8  10  18 316.112 93.5954  -2
  -9   2  10 316.112 93.5954   1
   7   9  17 326.484 83.9995  -2
  -8   2  10 326.484 83.9995   1
   6   8  16 106.570 25.8556  -2
  -7   2  10 106.570 25.8556   1
   5   7  15 411.173 31.2196  -2
  -6   2  10 411.173 31.2196   1
   4   6  14 384.492 21.1840  -2
  -5   2  10 384.492 21.1840   1
   3   5  13 957.602 39.1963  -2
  -4   2  10 957.602 39.1963   1
  -3   2  10 3.11227 3.29487   1
   1   3  11 356.919 91.7267  -2
  -2   2  10 356.919 91.7267   1
   0   2  10 20.6211 72.0113  -2
  -1   2  10 20.6211 72.0113   1
   0   2  10 -3.6805 2.74864   1
   1   2  10 827.609 27.4538   1
   2   2  10 805.526 22.9164   1
   3   2  10 225.111 12.5838   1
   4   2  10 55.1345 8.11922   1
   5   2  10 0.39661 4.71655   1
  -6  -4   4 5.30002 18.7541  -2
   6   2  10 5.30002 18.7541   1
  -7  -5   3 250.835 23.3876  -2
   7   2  10 250.835 23.3876   1
  -8  -6   2 98.4276 23.8922  -2
   8   2  10 98.4276 23.8922   1
  -9  -7   1 998.590 65.4784  -2
   9   2  10 998.590 65.4784   1
   8  11  18 70.8144 92.2979  -2
  -9   3  10 70.8144 92.2979   1
   7  10  17 -47.010 77.5297  -2
  -8   3  10 -47.010 77.5297   1
   6   9  16 305.915 77.9534  -2
  -7   3  10 305.915 77.9534   1
   5   8  15 129.020 25.4961  -2
  -6   3  10 129.020 25.4961   1
   4   7  14 408.975 29.7769  -2
  -5   3  10 408.975 29.7769   1
   3   6  13 102.513 33.6581  -2
  -4   3  10 102.513 33.6581   1
  -3   3  10 602.036 23.8056   1
  -2   3  10 28.3523 5.80825   1
   0   3  10 24.2422 4.23632   1
   1   3  10 -1.0955 3.17761   1
   2   3  10 -2.1419 3.05110   1
   3   3  10 195.156 12.1656   1
   4   3  10 438.711 20.2637   1
   5   3  10 503.960 18.7003   1
  -6  -3   4 -71.618 76.0820  -2
   6   3  10 -71.618 76.0820   1
  -7  -4   3 -12.391 84.0366  -2
   7   3  10 -12.391 84.0366   1
  -8  -5   2 35.2763 20.2541  -2
   8   3  10 35.2763 20.2541   1
  -9   4  10 3.44814 45.3420   1
   7  11  17 -31.809 83.5560  -2
  -8   4  10 -31.809 83.5560   1
   5   9  15 10.1588 43.3176  -2
  -6   4  10 10.1588 43.3176   1
  -5   4  10 -9.5005 11.1232   1
   3   7  13 40.9535 34.2347  -2
  -4   4  10 40.9535 34.2347   1
  -3   4  10 44.5816 7.33868   1
  -2   4  10 -3.4749 4.55074   1
  -1   4  10 11.9701 5.52657   1
   0   4  10 95.1541 12.6221   1
   1   4  10 189.218 10.9418   1
   2   4  10 1788.05 38.8069   1
   3   4  10 1062.55 26.5098   1
   4   4  10 71.4521 9.71724   1
   5   4  10 83.8194 10.8252   1
   6   4  10 687.441 27.5924   1
  -7  -3   3 208.996 81.0687  -2
   7   4  10 208.996 81.0687   1
  -8  -4   2 -11.113 84.1031  -2
   8   4  10 -11.113 84.1031   1
   9   4  10 13.5431 7.38097   1
 -10  -6   1 41.8275 36.1163  -2
  10   4  10 41.8275 36.1163   1
  -7   5  10 14.8045 37.4554   1
  -6   5  10 35.1074 33.1223   1
   4   9  14 97.6944 42.5628  -2
  -5   5  10 97.6944 42.5628   1
  -4   5  10 91.2602 15.8368   1
  -3   5  10 749.984 28.6259   1
  -2   5  10 934.061 35.7117   1
  -1   5  10 21.3901 5.91177   1
   0   5  10 293.503 19.1434   1
   1   5  10 377.295 20.3857   1
   2   5  10 72.9440 12.8049   1
   3   5  10 57.4253 9.19563   1
   4   5  10 46.5927 5.85532   1
   5   5  10 116.753 11.3920   1
   6   5  10 241.240 15.2293   1
   7   5  10 82.6428 10.9854   1
   8   5  10 21.9981 6.22604   1
  -9  -4   1 8.89516 87.8988  -2
   9   5  10 8.89516 87.8988   1
  10   5  10 13.4281 10.2978   1
  11   6   1 131.276 47.4696  -2
  11   5  10 131.276 47.4696   1
  14   9   3 205.626 53.8893  -2
  14   5  10 205.626 53.8893   1
  -5   6  10 203.366 36.2104   1
   2   9  13 388.940 41.8331  -2
  -4   6  10 388.940 41.8331   1
  -3   6  10 130.464 19.0398   1
  -2   6  10 310.784 22.7476   1
  -1   6  10 515.025 25.8143   1
   0   6  10 91.9148 14.7474   1
   1   6  10 63.6496 13.9957   1
   2   6  10 27.9449 6.52792   1
   3   6  10 76.2521 10.0054   1
   4   6  10 59.4642 11.5937   1
   5   6  10 71.5917 11.0666   1
   6   6  10 193.528 14.2781   1
   7   6  10 15.8538 6.52472   1
   8   6  10 254.198 14.8975   1
   9   6  10 367.741 16.9146   1
  10   4   0 147.650 85.3811  -2
  10   6  10 147.650 85.3811   1
  11   5   1 29.0525 85.4233  -2
  11   6  10 29.0525 85.4233   1
  12   6   2 -22.018 49.1446  -2
  12   6  10 -22.018 49.1446   1
   2  10  13 -39.856 32.9631  -2
  -4   7  10 -39.856 32.9631   1
   1   9  12 4.90142 31.3068  -2
  -3   7  10 4.90142 31.3068   1
  -2   7  10 9.66303 7.52933   1
  -1   7  10 119.335 17.9974   1
   0   7  10 6.18892 6.29391   1
   1   7  10 -4.4377 5.28221   1
   2   7  10 159.516 17.3582   1
   3   7  10 203.579 17.9191   1
   4   7  10 4.93467 4.61285   1
   5   7  10 11.4449 4.97179   1
   6   7  10 320.187 17.5235   1
   7   7  10 668.806 24.7156   1
   8   7  10 285.291 18.9557   1
   9   7  10 -3.0750 8.43509   1
  10   7  10 156.198 26.0078   1
  11   7  10 10.2609 11.9659   1
  13   7  10 5.23966 17.6935   1
   3  12  14 45.5804 40.2252  -2
  -5   8  10 45.5804 40.2252   1
   2  11  13 -23.324 27.6504  -2
  -4   8  10 -23.324 27.6504   1
   1  10  12 24.1254 33.8704  -2
  -3   8  10 24.1254 33.8704   1
   0   9  11 55.6928 30.2400  -2
  -2   8  10 55.6928 30.2400   1
  -1   8  10 55.3320 13.5698   1
   0   8  10 21.3846 7.76343   1
   1   8  10 731.833 32.0524   1
   2   8  10 1482.06 48.2297   1
   3   8  10 550.440 27.3951   1
   4   8  10 109.485 17.2975   1
   5   8  10 213.958 14.5851   1
   6   8  10 219.731 16.3466   1
   7   8  10 18.9151 7.67074   1
   8   8  10 -0.1175 7.20393   1
   9   8  10 38.8934 8.78132   1
  10   8  10 -4.7138 14.2358   1
  11   8  10 25.8280 12.9437   1
  13   8  10 -5.7105 16.9122   1
   4  14  15 79.6890 47.5120  -2
  -6   9  10 79.6890 47.5120   1
   3  13  14 2.92266 41.7388  -2
  -5   9  10 2.92266 41.7388   1
   2  12  13 56.2045 30.4421  -2
  -4   9  10 56.2045 30.4421   1
   1  11  12 387.295 36.3518  -2
  -3   9  10 387.295 36.3518   1
   0  10  11 273.008 38.7108  -2
  -2   9  10 273.008 38.7108   1
  -1   9  10 138.031 32.6812  -2
  -1   9  10 138.031 32.6812   1
  -2   8   9 432.339 42.6825  -2
   0   9  10 432.339 42.6825   1
   1   9  10 233.853 22.4732   1
   2   9  10 7.47406 7.04971   1
  -4   6   7 235.130 37.8566  -2
   3   9  10 235.130 37.8566   1
  -5   5   6 64.1603 34.1446  -2
   4   9  10 64.1603 34.1446   1
  -6   4   5 55.7150 24.6560  -2
   5   9  10 55.7150 24.6560   1
  -7   3   4 -15.310 23.7556  -2
   6   9  10 -15.310 23.7556   1
  -8   2   3 200.058 30.2434  -2
   7   9  10 200.058 30.2434   1
  -9   1   2 51.7689 52.7450  -2
   8   9  10 51.7689 52.7450   1
   9   9  10 -9.4284 8.86626   1
  10   9  10 31.8012 12.6749   1
  11   9  10 28.9027 19.3252   1
  13   9  10 -18.455 20.3869   1
  14   9  10 -25.170 22.6385   1
   3  14  14 323.026 53.2151  -2
  -5  10  10 323.026 53.2151   1
   2  13  13 185.974 35.7206  -2
  -4  10  10 185.974 35.7206   1
   1  12  12 104.491 32.5176  -2
  -3  10  10 104.491 32.5176   1
   0  11  11 374.318 35.2851  -2
  -2  10  10 374.318 35.2851   1
  -1  10  10 349.047 41.9222  -2
  -1  10  10 349.047 41.9222   1
  -2   9   9 160.440 36.3539  -2
   0  10  10 160.440 36.3539   1
   1  10  10 43.1083 9.54151   1
   2  10  10 46.4263 9.80135   1
  -4   7   7 90.9150 35.9320  -2
   3  10  10 90.9150 35.9320   1
   4  10  10 -2.2539 12.6480   1
  -6   5   5 -34.386 24.9773  -2
   5  10  10 -34.386 24.9773   1
  -7   4   4 756.562 39.9037  -2
   6  10  10 756.562 39.9037   1
  -8   3   3 438.361 37.9967  -2
   7  10  10 438.361 37.9967   1
  -9   2   2 -14.639 23.9905  -2
   8  10  10 -14.639 23.9905   1
 -10   1   1 91.3910 26.3134  -2
   9  10  10 91.3910 26.3134   1
  10  10  10 17.1971 16.8113   1
  11  10  10 -6.6983 18.6809   1
  12  10  10 19.0007 22.2661   1
  13  10  10 -2.3193 23.3734   1
  14  10  10 11.2537 20.2163   1
   2  14  13 -30.553 32.6602  -2
  -4  11  10 -30.553 32.6602   1
   1  13  12 25.3580 32.5282  -2
  -3  11  10 25.3580 32.5282   1
   0  12  11 3.10815 29.6100  -2
  -2  11  10 3.10815 29.6100   1
  -1  11  10 170.993 32.8342  -2
  -1  11  10 170.993 32.8342   1
  -2  10   9 23.5652 35.3742  -2
   0  11  10 23.5652 35.3742   1
   1  11  10 14.2756 14.8415   1
   2  11  10 -11.690 13.3984   1
  -4   8   7 138.913 38.4475  -2
   3  11  10 138.913 38.4475   1
  -5   7   6 73.1333 38.9390  -2
   4  11  10 73.1333 38.9390   1
  -6   6   5 296.811 32.8269  -2
   5  11  10 296.811 32.8269   1
  -7   5   4 387.737 34.5541  -2
   6  11  10 387.737 34.5541   1
  -8   4   3 832.260 43.6519  -2
   7  11  10 832.260 43.6519   1
  -9   3   2 174.400 26.3737  -2
   8  11  10 174.400 26.3737   1
 -10   2   1 -30.530 33.9601  -2
   9  11  10 -30.530 33.9601   1
  10  11  10 11.9296 16.1489   1
   1  14  12 -10.448 32.4590  -2
  -3  12  10 -10.448 32.4590   1
   0  13  11 121.006 34.4563  -2
  -2  12  10 121.006 34.4563   1
  -1  12  10 310.096 38.1262  -2
  -1  12  10 310.096 38.1262   1
  -2  11   9 359.918 38.4436  -2
   0  12  10 359.918 38.4436   1
   1  12  10 7.73413 17.2089   1
   2  12  10 74.2615 21.6739   1
   3  12  10 36.5268 18.4192   1
  -5   8   6 99.4753 51.0009  -2
   4  12  10 99.4753 51.0009   1
  -6   7   5 200.858 33.1882  -2
   5  12  10 200.858 33.1882   1
  -7   6   4 135.197 32.9789  -2
   6  12  10 135.197 32.9789   1
  -8   5   3 96.8743 32.1895  -2
   7  12  10 96.8743 32.1895   1
  -9   4   2 28.7653 31.8172  -2
   8  12  10 28.7653 31.8172   1
 -10   3   1 41.5378 36.7427  -2
   9  12  10 41.5378 36.7427   1
   0  14  11 188.308 36.9615  -2
  -2  13  10 188.308 36.9615   1
  -1  13  10 11.8470 34.3872  -2
  -1  13  10 11.8470 34.3872   1
  -2  12   9 114.499 35.8410  -2
   0  13  10 114.499 35.8410   1
  -3  11   8 158.269 61.2602  -2
   1  13  10 158.269 61.2602   1
   2  13  10 3.48622 17.6087   1
   3  13  10 19.8916 19.7167   1
  -5   9   6 99.2524 55.0111  -2
   4  13  10 99.2524 55.0111   1
  -6   8   5 127.658 53.1735  -2
   5  13  10 127.658 53.1735   1
  -7   7   4 127.704 35.0517  -2
   6  13  10 127.704 35.0517   1
  -8   6   3 256.923 37.7892  -2
   7  13  10 256.923 37.7892   1
  -9   5   2 226.810 35.3591  -2
   8  13  10 226.810 35.3591   1
 -10   4   1 -1.4704 37.8164  -2
   9  13  10 -1.4704 37.8164   1
  -2  13   9 11.2845 34.5563  -2
   0  14  10 11.2845 34.5563   1
   2  14  10 33.9582 20.4417   1
   3  14  10 37.4738 19.8469   1
   4  14  10 9.87143 18.9705   1
  -6   9   5 60.0028 58.5323  -2
   5  14  10 60.0028 58.5323   1
  -7   8   4 236.611 39.1999  -2
   6  14  10 236.611 39.1999   1
  -8   7   3 -15.054 34.5825  -2
   7  14  10 -15.054 34.5825   1
  -9   6   2 17.4329 35.5448  -2
   8  14  10 17.4329 35.5448   1
 -10   5   1 188.979 36.7507  -2
   9  14  10 188.979 36.7507   1
   3  15  10 143.200 42.7801   1
   4  15  10 261.841 46.6531   1
  -6  10   5 377.566 72.8712  -2
   5  15  10 377.566 72.8712   1
  -7   9   4 95.6748 61.1540  -2
   6  15  10 95.6748 61.1540   1
  -8   8   3 28.6240 49.2917  -2
   7  15  10 28.6240 49.2917   1
  -9   7   2 -45.159 49.5125  -2
   8  15  10 -45.159 49.5125   1
 -10   6   1 -12.088 36.6499  -2
   9  15  10 -12.088 36.6499   1
  10  15  10 -15.000 19.3329   1
  -2 -10  11 17.9084 13.0100   1
  -6  -9  11 3.56858 11.1030   1
   5  -4  16 30.9986 43.3008  -2
  -5  -9  11 30.9986 43.3008   1
   4  -5  15 -21.604 21.1915  -2
  -4  -9  11 -21.604 21.1915   1
   3  -6  14 5.67435 20.8305  -2
  -3  -9  11 5.67435 20.8305   1
   2  -7  13 12.0660 20.5667  -2
  -2  -9  11 12.0660 20.5667   1
   1  -8  12 11.6362 15.2840  -2
  -1  -9  11 11.6362 15.2840   1
   0  -9  11 13.3234 14.8716  -2
   0  -9  11 13.3234 14.8716   1
  -1 -10  10 207.718 23.0389  -2
   1  -9  11 207.718 23.0389   1
  -2 -11   9 116.716 27.4402  -2
   2  -9  11 116.716 27.4402   1
  -7  -8  11 27.2552 12.1701   1
   6  -2  17 165.353 32.2382  -2
  -6  -8  11 165.353 32.2382   1
   5  -3  16 155.344 29.9790  -2
  -5  -8  11 155.344 29.9790   1
   4  -4  15 71.4659 24.2262  -2
  -4  -8  11 71.4659 24.2262   1
   3  -5  14 139.876 22.2119  -2
  -3  -8  11 139.876 22.2119   1
   2  -6  13 24.8951 20.5377  -2
  -2  -8  11 24.8951 20.5377   1
   1  -7  12 51.0669 20.2643  -2
  -1  -8  11 51.0669 20.2643   1
   0  -8  11 81.4543 21.7509  -2
   0  -8  11 81.4543 21.7509   1
  -1  -9  10 -8.7862 24.1792  -2
   1  -8  11 -8.7862 24.1792   1
  -2 -10   9 108.984 26.7052  -2
   2  -8  11 108.984 26.7052   1
  -3 -11   8 64.1052 26.4569  -2
   3  -8  11 64.1052 26.4569   1
  -4 -12   7 67.8209 26.9549  -2
   4  -8  11 67.8209 26.9549   1
   7   0  18 104.851 37.9960  -2
  -8  -7  11 104.851 37.9960   1
   6  -1  17 -45.964 40.6900  -2
  -7  -7  11 -45.964 40.6900   1
   6  -1  17 11.3793 36.6475  -2
  -6  -7  11 11.3793 36.6475   1
   5  -2  16 161.963 28.3293  -2
  -5  -7  11 161.963 28.3293   1
   4  -3  15 366.843 27.0002  -2
  -4  -7  11 366.843 27.0002   1
   3  -4  14 -14.474 23.6180  -2
  -3  -7  11 -14.474 23.6180   1
   2  -5  13 352.623 26.4159  -2
  -2  -7  11 352.623 26.4159   1
   1  -6  12 338.966 25.0339  -2
  -1  -7  11 338.966 25.0339   1
   0  -7  11 80.9862 26.0955  -2
   0  -7  11 80.9862 26.0955   1
  -1  -8  10 50.3171 25.0522  -2
   1  -7  11 50.3171 25.0522   1
  -2  -9   9 -44.722 28.2732  -2
   2  -7  11 -44.722 28.2732   1
  -3 -10   8 6.45865 22.4969  -2
   3  -7  11 6.45865 22.4969   1
  -4 -11   7 39.8646 24.5628  -2
   4  -7  11 39.8646 24.5628   1
  -5 -12   6 -31.568 17.1121  -2
   5  -7  11 -31.568 17.1121   1
  -6 -13   5 -118.41 117.963  -2
   6  -7  11 -118.41 117.963   1
   8   2  19 90.5778 38.6231  -2
  -9  -6  11 90.5778 38.6231   1
   7   1  18 78.6109 35.3668  -2
  -8  -6  11 78.6109 35.3668   1
   6   0  17 105.644 35.5353  -2
  -7  -6  11 105.644 35.5353   1
   5  -1  16 -46.926 54.7742  -2
  -6  -6  11 -46.926 54.7742   1
  -5  -6  11 -7.9206 8.91414   1
   4  -2  15 113.091 24.1133  -2
  -4  -6  11 113.091 24.1133   1
   3  -3  14 302.078 24.3392  -2
  -3  -6  11 302.078 24.3392   1
   2  -4  13 24.3173 21.7314  -2
  -2  -6  11 24.3173 21.7314   1
   1  -5  12 8.95111 23.2863  -2
  -1  -6  11 8.95111 23.2863   1
   0  -6  11 30.2745 22.3566  -2
   0  -6  11 30.2745 22.3566   1
  -1  -7  10 37.1984 23.0125  -2
   1  -6  11 37.1984 23.0125   1
  -2  -8   9 117.907 24.6188  -2
   2  -6  11 117.907 24.6188   1
  -3  -9   8 16.3668 35.2453  -2
   3  -6  11 16.3668 35.2453   1
  -4 -10   7 96.6497 26.7774  -2
   4  -6  11 96.6497 26.7774   1
  -5 -11   6 191.873 29.5893  -2
   5  -6  11 191.873 29.5893   1
  -6 -12   5 70.9916 19.9534  -2
   6  -6  11 70.9916 19.9534   1
  -7 -13   4 2.61630 28.8878  -2
   7  -6  11 2.61630 28.8878   1
   8   3  19 88.1329 31.5262  -2
  -9  -5  11 88.1329 31.5262   1
   7   2  18 58.0948 36.6358  -2
  -8  -5  11 58.0948 36.6358   1
   6   1  17 39.8140 25.0582  -2
  -7  -5  11 39.8140 25.0582   1
   5   0  16 6.03439 54.1971  -2
  -6  -5  11 6.03439 54.1971   1
  -5  -5  11 -5.5073 7.13025   1
   4  -1  15 -27.906 19.6240  -2
  -4  -5  11 -27.906 19.6240   1
   3  -2  14 31.9554 21.5015  -2
  -3  -5  11 31.9554 21.5015   1
   2  -3  13 540.318 26.4761  -2
  -2  -5  11 540.318 26.4761   1
   1  -4  12 954.695 33.7173  -2
  -1  -5  11 954.695 33.7173   1
   0  -5  11 705.854 36.4549  -2
   0  -5  11 705.854 36.4549   1
  -1  -6  10 944.562 42.3068  -2
   1  -5  11 944.562 42.3068   1
  -2  -7   9 759.239 38.8759  -2
   2  -5  11 759.239 38.8759   1
  -3  -8   8 120.473 26.1923  -2
   3  -5  11 120.473 26.1923   1
  -4  -9   7 -7.3365 24.7902  -2
   4  -5  11 -7.3365 24.7902   1
  -5 -10   6 83.1186 25.9642  -2
   5  -5  11 83.1186 25.9642   1
  -6 -11   5 -32.081 27.3715  -2
   6  -5  11 -32.081 27.3715   1
  -7 -12   4 -60.834 16.9916  -2
   7  -5  11 -60.834 16.9916   1
  -8 -13   3 -11.770 34.9387  -2
   8  -5  11 -11.770 34.9387   1
   8   4  19 17.9109 29.3811  -2
  -9  -4  11 17.9109 29.3811   1
   7   3  18 208.432 38.9376  -2
  -8  -4  11 208.432 38.9376   1
   6   2  17 174.352 35.2516  -2
  -7  -4  11 174.352 35.2516   1
   5   1  16 118.152 32.7823  -2
  -6  -4  11 118.152 32.7823   1
   4   0  15 109.919 53.2702  -2
  -5  -4  11 109.919 53.2702   1
   3  -1  14 375.232 67.7227  -2
  -4  -4  11 375.232 67.7227   1
  -3  -4  11 504.419 21.4842   1
   2  -2  13 126.165 21.2436  -2
  -2  -4  11 126.165 21.2436   1
   1  -3  12 187.839 20.0892  -2
  -1  -4  11 187.839 20.0892   1
   0  -4  11 1249.97 46.3584  -2
   0  -4  11 1249.97 46.3584   1
  -1  -5  10 103.295 25.0873  -2
   1  -4  11 103.295 25.0873   1
  -2  -6   9 -26.916 22.6897  -2
   2  -4  11 -26.916 22.6897   1
  -3  -7   8 123.077 26.4718  -2
   3  -4  11 123.077 26.4718   1
  -4  -8   7 267.231 45.2971  -2
   4  -4  11 267.231 45.2971   1
  -5  -9   6 8.45365 24.4922  -2
   5  -4  11 8.45365 24.4922   1
  -6 -10   5 1.64596 25.1658  -2
   6  -4  11 1.64596 25.1658   1
  -7 -11   4 -52.352 28.4160  -2
   7  -4  11 -52.352 28.4160   1
  -8 -12   3 37.7896 28.7750  -2
   8  -4  11 37.7896 28.7750   1
  -9 -13   2 18.2528 45.6179  -2
   9  -4  11 18.2528 45.6179   1
 -10  -3  11 189.990 37.4644   1
   8   5  19 94.9032 39.6633  -2
  -9  -3  11 94.9032 39.6633   1
   7   4  18 517.450 39.3169  -2
  -8  -3  11 517.450 39.3169   1
   6   3  17 152.352 33.9057  -2
  -7  -3  11 152.352 33.9057   1
   5   2  16 138.524 24.1002  -2
  -6  -3  11 138.524 24.1002   1
   4   1  15 310.043 64.2223  -2
  -5  -3  11 310.043 64.2223   1
   3   0  14 670.957 74.2789  -2
  -4  -3  11 670.957 74.2789   1
  -3  -3  11 83.2042 10.8103   1
   2  -1  13 256.023 54.8918  -2
  -2  -3  11 256.023 54.8918   1
   1  -2  12 355.634 34.4062  -2
  -1  -3  11 355.634 34.4062   1
   0  -3  11 135.829 22.7409  -2
   0  -3  11 135.829 22.7409   1
  -1  -4  10 295.302 26.2819  -2
   1  -3  11 295.302 26.2819   1
  -2  -5   9 134.671 25.4529  -2
   2  -3  11 134.671 25.4529   1
  -4  -7   7 -21.098 24.0954  -2
   4  -3  11 -21.098 24.0954   1
  -5  -8   6 181.717 28.0689  -2
   5  -3  11 181.717 28.0689   1
  -6  -9   5 50.8401 26.3342  -2
   6  -3  11 50.8401 26.3342   1
  -7 -10   4 97.2622 27.2622  -2
   7  -3  11 97.2622 27.2622   1
  -8 -11   3 80.2018 27.2401  -2
   8  -3  11 80.2018 27.2401   1
  -9 -12   2 -13.911 126.480  -2
   9  -3  11 -13.911 126.480   1
 -10 -13   1 105.655 49.6964  -2
  10  -3  11 105.655 49.6964   1
   9   7  20 86.7035 52.5751  -2
 -10  -2  11 86.7035 52.5751   1
   8   6  19 62.4800 34.0842  -2
  -9  -2  11 62.4800 34.0842   1
   7   5  18 180.870 28.9636  -2
  -8  -2  11 180.870 28.9636   1
   6   4  17 159.965 22.0184  -2
  -7  -2  11 159.965 22.0184   1
   5   3  16 16.7136 32.2507  -2
  -6  -2  11 16.7136 32.2507   1
   4   2  15 10.9979 19.6276  -2
  -5  -2  11 10.9979 19.6276   1
   3   1  14 35.4483 27.1520  -2
  -4  -2  11 35.4483 27.1520   1
   2   0  13 39.1769 43.6664  -2
  -3  -2  11 39.1769 43.6664   1
  -2  -2  11 32.3367 5.71176   1
  -1  -2  11 166.366 13.7650   1
   0  -2  11 -25.719 88.9112  -2
   0  -2  11 -25.719 88.9112   1
  -1  -3  10 70.4108 19.8839  -2
   1  -2  11 70.4108 19.8839   1
  -2  -4   9 224.657 31.9159  -2
   2  -2  11 224.657 31.9159   1
  -3  -5   8 1022.99 40.4422  -2
   3  -2  11 1022.99 40.4422   1
  -4  -6   7 1730.97 56.5549  -2
   4  -2  11 1730.97 56.5549   1
  -5  -7   6 891.974 40.8161  -2
   5  -2  11 891.974 40.8161   1
  -6  -8   5 401.253 31.8782  -2
   6  -2  11 401.253 31.8782   1
  -7  -9   4 10.0961 25.1213  -2
   7  -2  11 10.0961 25.1213   1
  -9 -11   2 -29.802 40.0378  -2
   9  -2  11 -29.802 40.0378   1
 -10 -12   1 -32.353 123.662  -2
  10  -2  11 -32.353 123.662   1
  11  -2  11 -14.224 18.6496   1
   8   7  19 46.6455 36.7782  -2
  -9  -1  11 46.6455 36.7782   1
   7   6  18 22.0501 20.6393  -2
  -8  -1  11 22.0501 20.6393   1
   6   5  17 7.62918 16.7620  -2
  -7  -1  11 7.62918 16.7620   1
   5   4  16 46.6443 16.5596  -2
  -6  -1  11 46.6443 16.5596   1
   4   3  15 -30.766 21.3883  -2
  -5  -1  11 -30.766 21.3883   1
  -4  -1  11 461.296 14.7604   1
   2   1  13 91.7165 108.847  -2
  -3  -1  11 91.7165 108.847   1
   1   0  12 61.5259 102.497  -2
  -2  -1  11 61.5259 102.497   1
  -1  -1  11 378.543 15.7529   1
   0  -1  11 88.3316 11.6359   1
   1  -1  11 141.067 13.0245   1
  -2  -3   9 874.375 34.6825  -2
   2  -1  11 874.375 34.6825   1
  -3  -4   8 586.561 30.5082  -2
   3  -1  11 586.561 30.5082   1
  -4  -5   7 110.242 24.3948  -2
   4  -1  11 110.242 24.3948   1
  -5  -6   6 139.773 25.9373  -2
   5  -1  11 139.773 25.9373   1
  -6  -7   5 71.4377 25.4200  -2
   6  -1  11 71.4377 25.4200   1
  -7  -8   4 -16.173 25.0770  -2
   7  -1  11 -16.173 25.0770   1
  -8  -9   3 -26.349 25.7366  -2
   8  -1  11 -26.349 25.7366   1
  -9 -10   2 -76.282 82.8703  -2
   9  -1  11 -76.282 82.8703   1
 -10 -11   1 64.0901 118.293  -2
  10  -1  11 64.0901 118.293   1
  11  12   0 -71.814 125.496  -2
  11  -1  11 -71.814 125.496   1
 -10   0  11 11.4083 48.2719   1
   7   7  18 90.6460 29.2141  -2
  -8   0  11 90.6460 29.2141   1
   6   6  17 106.359 20.1179  -2
  -7   0  11 106.359 20.1179   1
   5   5  16 -7.4500 16.1939  -2
  -6   0  11 -7.4500 16.1939   1
   4   4  15 519.361 29.5068  -2
  -5   0  11 519.361 29.5068   1
   3   3  14 666.528 28.4184  -2
  -4   0  11 666.528 28.4184   1
   2   2  13 19.0941 103.708  -2
  -3   0  11 19.0941 103.708   1
   1   1  12 126.044 108.981  -2
  -2   0  11 126.044 108.981   1
   0   0  11 674.019 21.9387   1
   1   0  11 233.389 14.1217   1
   2   0  11 247.998 14.9138   1
  -3  -3   8 573.164 31.6265  -2
   3   0  11 573.164 31.6265   1
   4   0  11 14.9040 10.5897   1
  -5  -5   6 856.430 36.2246  -2
   5   0  11 856.430 36.2246   1
  -6  -6   5 1030.70 40.5955  -2
   6   0  11 1030.70 40.5955   1
  -7  -7   4 39.8415 35.8129  -2
   7   0  11 39.8415 35.8129   1
  -8  -8   3 25.6645 37.1047  -2
   8   0  11 25.6645 37.1047   1
 -10 -10   1 -30.296 79.4352  -2
  10   0  11 -30.296 79.4352   1
  11  11   0 -21.315 116.926  -2
  11   0  11 -21.315 116.926   1
  12  12   1 -57.518 127.280  -2
  12   0  11 -57.518 127.280   1
   6   7  17 243.380 27.5851  -2
  -7   1  11 243.380 27.5851   1
   5   6  16 29.0909 22.3576  -2
  -6   1  11 29.0909 22.3576   1
   4   5  15 827.052 36.1003  -2
  -5   1  11 827.052 36.1003   1
   3   4  14 289.939 18.7987  -2
  -4   1  11 289.939 18.7987   1
  -3   1  11 -4.1727 3.24838   1
   1   2  12 -30.887 92.5820  -2
  -2   1  11 -30.887 92.5820   1
   0   1  11 -80.815 89.1788  -2
  -1   1  11 -80.815 89.1788   1
   0   1  11 104.759 9.80637   1
   1   1  11 564.266 19.5603   1
   3   1  11 5.58100 5.32105   1
  -4  -3   7 663.331 44.1553  -2
   4   1  11 663.331 44.1553   1
   5   1  11 135.775 22.8064   1
  -6  -5   5 387.690 38.9950  -2
   6   1  11 387.690 38.9950   1
  -7  -6   4 93.9028 24.6102  -2
   7   1  11 93.9028 24.6102   1
  -8  -7   3 353.359 31.7263  -2
   8   1  11 353.359 31.7263   1
  12  11   1 -44.625 115.167  -2
  12   1  11 -44.625 115.167   1
   8  10  19 119.382 87.8724  -2
  -9   2  11 119.382 87.8724   1
   7   9  18 92.6462 77.6796  -2
  -8   2  11 92.6462 77.6796   1
   6   8  17 162.622 70.2736  -2
  -7   2  11 162.622 70.2736   1
   5   7  16 84.1650 24.5456  -2
  -6   2  11 84.1650 24.5456   1
   4   6  15 160.110 28.3366  -2
  -5   2  11 160.110 28.3366   1
   3   5  14 111.710 17.9147  -2
  -4   2  11 111.710 17.9147   1
   2   4  13 63.6203 32.3111  -2
  -3   2  11 63.6203 32.3111   1
   1   3  12 -77.175 90.1485  -2
  -2   2  11 -77.175 90.1485   1
  -1   2  11 79.0043 8.35216   1
   0   2  11 421.335 14.1796   1
   1   2  11 274.689 14.1265   1
   3   2  11 291.204 14.8086   1
   4   2  11 502.610 19.1555   1
   5   2  11 79.0820 11.5912   1
  -6  -4   5 -42.738 79.4354  -2
   6   2  11 -42.738 79.4354   1
  -7  -5   4 155.209 24.6870  -2
   7   2  11 155.209 24.6870   1
  -8  -6   3 280.921 37.5145  -2
   8   2  11 280.921 37.5145   1
  -9  -7   2 26.4107 27.0271  -2
   9   2  11 26.4107 27.0271   1
   8  11  19 119.793 94.2323  -2
  -9   3  11 119.793 94.2323   1
   7  10  18 19.5789 82.3408  -2
  -8   3  11 19.5789 82.3408   1
   5   8  16 12.0485 60.3694  -2
  -6   3  11 12.0485 60.3694   1
   4   7  15 39.1220 27.9283  -2
  -5   3  11 39.1220 27.9283   1
   3   6  14 259.588 32.3496  -2
  -4   3  11 259.588 32.3496   1
  -3   3  11 74.4984 9.81847   1
  -2   3  11 54.6162 7.66141   1
  -1   3  11 121.111 10.2243   1
   0   3  11 79.5490 9.70996   1
   1   3  11 1350.48 27.8855   1
   2   3  11 987.013 26.4612   1
   3   3  11 848.047 24.4654   1
   4   3  11 -1.7914 4.70583   1
   5   3  11 24.2563 6.10496   1
   6   3  11 65.8461 9.84296   1
   7   3  11 47.0621 8.10856   1
  -8  -5   3 -29.322 28.2221  -2
   8   3  11 -29.322 28.2221   1
  -9  -6   2 578.824 43.9418  -2
   9   3  11 578.824 43.9418   1
  -7   4  11 8.41848 34.6254   1
   5   9  16 260.819 72.8537  -2
  -6   4  11 260.819 72.8537   1
   4   8  15 10.0334 38.1967  -2
  -5   4  11 10.0334 38.1967   1
   3   7  14 276.070 42.9770  -2
  -4   4  11 276.070 42.9770   1
  -3   4  11 652.772 26.3980   1
  -2   4  11 104.466 16.4200   1
  -1   4  11 3.18358 5.42223   1
   0   4  11 197.245 16.0961   1
   1   4  11 203.790 11.8034   1
   2   4  11 3.94195 4.07942   1
   3   4  11 6.84587 4.49754   1
   4   4  11 118.289 9.68081   1
   5   4  11 135.847 12.5924   1
   6   4  11 2.75330 5.81316   1
   7   4  11 9.80912 6.86943   1
   8   4  11 11.5911 6.90162   1
  -9  -5   2 19.7770 100.297  -2
   9   4  11 19.7770 100.297   1
 -10  -6   2 404.199 50.4202  -2
  10   4  11 404.199 50.4202   1
 -11  -7   1 326.189 50.5437  -2
  11   4  11 326.189 50.5437   1
  -7   5  11 -23.265 48.4067   1
  -6   5  11 75.1538 40.8518   1
  -5   5  11 226.860 50.0177   1
  -4   5  11 6.13834 10.5430   1
  -3   5  11 2.11966 6.91453   1
  -2   5  11 76.5306 12.7289   1
  -1   5  11 69.4422 11.8547   1
   0   5  11 54.9418 10.8304   1
   1   5  11 315.417 19.4979   1
   2   5  11 505.682 17.7729   1
   3   5  11 192.690 12.2894   1
   4   5  11 -3.2772 3.83438   1
   5   5  11 265.756 14.8125   1
   6   5  11 577.548 18.3891   1
   7   5  11 8.00393 6.42549   1
   8   5  11 51.4976 9.40882   1
   9   5  11 196.176 14.7384   1
  10   5  11 2.41549 10.3118   1
  11   5  11 15.0492 16.6306   1
  12   7   0 -10.021 43.7530  -2
  12   5  11 -10.021 43.7530   1
   2   9  14 5.33420 32.8292  -2
  -4   6  11 5.33420 32.8292   1
   1   8  13 349.250 39.8363  -2
  -3   6  11 349.250 39.8363   1
  -2   6  11 135.415 19.7606   1
  -1   6  11 -0.0706 5.90064   1
   0   6  11 92.1084 15.7179   1
   1   6  11 800.720 31.8109   1
   2   6  11 -0.9535 5.14195   1
   3   6  11 213.597 12.8164   1
   4   6  11 136.815 12.0524   1
   5   6  11 174.338 13.3265   1
   6   6  11 366.316 18.0425   1
   7   6  11 917.344 29.2873   1
   8   6  11 193.622 14.2381   1
   9   6  11 -6.9281 6.37661   1
  10   6  11 -15.894 9.94211   1
  11   6  11 11.8389 17.0406   1
  12   6  11 12.0014 17.3591   1
   2  10  14 178.522 29.9242  -2
  -4   7  11 178.522 29.9242   1
   1   9  13 251.992 38.3677  -2
  -3   7  11 251.992 38.3677   1
   0   8  12 206.597 35.2090  -2
  -2   7  11 206.597 35.2090   1
  -1   7  11 360.090 24.5404   1
   0   7  11 26.2208 7.11790   1
   1   7  11 97.7597 16.7123   1
   2   7  11 438.627 24.1366   1
   3   7  11 119.861 17.0382   1
   4   7  11 8.37992 5.28422   1
  -6   2   6 -14.765 30.1698  -2
   5   7  11 -14.765 30.1698   1
  -7   1   5 21.6012 33.0474  -2
   6   7  11 21.6012 33.0474   1
   7   7  11 -4.0303 7.77611   1
   8   7  11 44.8722 8.64481   1
   9   7  11 58.4994 9.46621   1
  10   7  11 16.0534 11.6033   1
  11   7  11 -5.6015 16.6720   1
  12   7  11 6.38900 12.6485   1
  13   7  11 16.8876 19.7784   1
   3  12  15 410.363 51.7042  -2
  -5   8  11 410.363 51.7042   1
   2  11  14 43.3004 28.6876  -2
  -4   8  11 43.3004 28.6876   1
   1  10  13 81.0453 28.4311  -2
  -3   8  11 81.0453 28.4311   1
   0   9  12 157.907 36.0474  -2
  -2   8  11 157.907 36.0474   1
  -1   8  11 181.638 32.3089  -2
  -1   8  11 181.638 32.3089   1
   0   8  11 109.763 19.1428   1
   1   8  11 11.8598 7.11827   1
   2   8  11 -5.8597 5.87452   1
   3   8  11 26.2714 7.32803   1
  -5   4   7 1.68044 32.2197  -2
   4   8  11 1.68044 32.2197   1
  -6   3   6 -8.6659 22.4543  -2
   5   8  11 -8.6659 22.4543   1
  -7   2   5 377.626 43.0164  -2
   6   8  11 377.626 43.0164   1
  -8   1   4 673.085 36.3107  -2
   7   8  11 673.085 36.3107   1
   8   8  11 349.139 21.1685   1
   9   8  11 -3.5418 7.32514   1
  10   8  11 138.034 32.9147   1
  11   8  11 24.0635 13.1022   1
  12   8  11 2.37553 17.8189   1
  13   8  11 15.7322 20.3661   1
   4  14  16 191.649 51.4033  -2
  -6   9  11 191.649 51.4033   1
   3  13  15 38.2613 43.3559  -2
  -5   9  11 38.2613 43.3559   1
   2  12  14 9.36714 29.9779  -2
  -4   9  11 9.36714 29.9779   1
   1  11  13 -24.644 27.4204  -2
  -3   9  11 -24.644 27.4204   1
   0  10  12 8.29725 25.7048  -2
  -2   9  11 8.29725 25.7048   1
  -1   9  11 -27.214 28.7224  -2
  -1   9  11 -27.214 28.7224   1
  -2   8  10 33.2331 29.7578  -2
   0   9  11 33.2331 29.7578   1
  -3   7   9 407.741 40.5612  -2
   1   9  11 407.741 40.5612   1
   2   9  11 770.558 34.7978   1
  -4   6   8 302.497 39.9087  -2
   3   9  11 302.497 39.9087   1
  -5   5   7 60.5922 25.2469  -2
   4   9  11 60.5922 25.2469   1
  -6   4   6 384.363 30.8489  -2
   5   9  11 384.363 30.8489   1
  -7   3   5 489.230 33.0533  -2
   6   9  11 489.230 33.0533   1
  -8   2   4 126.345 23.6423  -2
   7   9  11 126.345 23.6423   1
  -9   1   3 23.5973 24.0582  -2
   8   9  11 23.5973 24.0582   1
 -10   0   2 35.5766 42.9034  -2
   9   9  11 35.5766 42.9034   1
  10   9  11 -1.6070 14.4649   1
  11   9  11 7.10014 18.0061   1
   3  14  15 -49.144 42.4098  -2
  -5  10  11 -49.144 42.4098   1
   2  13  14 38.3193 30.3272  -2
  -4  10  11 38.3193 30.3272   1
   1  12  13 17.9047 29.4351  -2
  -3  10  11 17.9047 29.4351   1
   0  11  12 87.6140 29.3319  -2
  -2  10  11 87.6140 29.3319   1
  -1  10  11 -13.689 26.1889  -2
  -1  10  11 -13.689 26.1889   1
  -2   9  10 341.401 42.0582  -2
   0  10  11 341.401 42.0582   1
  -3   8   9 579.276 48.5777  -2
   1  10  11 579.276 48.5777   1
   2  10  11 -12.055 12.2706   1
   3  10  11 189.256 32.9441   1
  -5   6   7 524.614 48.4123  -2
   4  10  11 524.614 48.4123   1
  -6   5   6 245.610 30.5964  -2
   5  10  11 245.610 30.5964   1
  -7   4   5 -1.8250 26.1879  -2
   6  10  11 -1.8250 26.1879   1
  -8   3   4 149.017 23.8885  -2
   7  10  11 149.017 23.8885   1
  -9   2   3 -17.515 39.6733  -2
   8  10  11 -17.515 39.6733   1
 -10   1   2 61.7849 28.3765  -2
   9  10  11 61.7849 28.3765   1
   2  14  14 90.3022 32.5142  -2
  -4  11  11 90.3022 32.5142   1
   1  13  13 -23.768 29.9877  -2
  -3  11  11 -23.768 29.9877   1
   0  12  12 192.617 33.8055  -2
  -2  11  11 192.617 33.8055   1
  -1  11  11 387.340 37.8196  -2
  -1  11  11 387.340 37.8196   1
  -2  10  10 202.569 34.0673  -2
   0  11  11 202.569 34.0673   1
  -3   9   9 86.4993 36.5420  -2
   1  11  11 86.4993 36.5420   1
   2  11  11 -7.5438 15.1239   1
   3  11  11 75.7523 20.8031   1
  -5   7   7 93.6134 36.1926  -2
   4  11  11 93.6134 36.1926   1
  -6   6   6 0.37847 27.2982  -2
   5  11  11 0.37847 27.2982   1
  -7   5   5 306.956 32.8787  -2
   6  11  11 306.956 32.8787   1
  -8   4   4 143.170 41.4037  -2
   7  11  11 143.170 41.4037   1
  -9   3   3 27.4399 23.4495  -2
   8  11  11 27.4399 23.4495   1
 -10   2   2 7.24282 27.7017  -2
   9  11  11 7.24282 27.7017   1
  13  11  11 -3.0344 24.2014   1
   1  14  13 58.8909 33.1078  -2
  -3  12  11 58.8909 33.1078   1
   0  13  12 53.4422 32.1658  -2
  -2  12  11 53.4422 32.1658   1
  -1  12  11 51.4478 32.7835  -2
  -1  12  11 51.4478 32.7835   1
  -2  11  10 8.12471 31.5589  -2
   0  12  11 8.12471 31.5589   1
   1  12  11 -5.1554 16.7326   1
   2  12  11 21.3445 18.2799   1
   3  12  11 -2.9557 16.9663   1
  -6   7   6 176.441 32.8887  -2
   5  12  11 176.441 32.8887   1
  -7   6   5 224.643 33.3284  -2
   6  12  11 224.643 33.3284   1
  -8   5   4 706.076 43.6529  -2
   7  12  11 706.076 43.6529   1
  -9   4   3 537.867 40.0152  -2
   8  12  11 537.867 40.0152   1
 -10   3   2 30.5543 36.5797  -2
   9  12  11 30.5543 36.5797   1
  -1  13  11 19.2310 32.4735  -2
  -1  13  11 19.2310 32.4735   1
  -2  12  10 89.0546 32.9300  -2
   0  13  11 89.0546 32.9300   1
  -3  11   9 -6.3560 55.4927  -2
   1  13  11 -6.3560 55.4927   1
   2  13  11 11.0445 18.2873   1
   3  13  11 8.77579 17.3971   1
   4  13  11 45.2702 20.0781   1
  -6   8   6 229.081 58.9066  -2
   5  13  11 229.081 58.9066   1
  -7   7   5 61.7286 33.4855  -2
   6  13  11 61.7286 33.4855   1
  -8   6   4 10.8414 31.8336  -2
   7  13  11 10.8414 31.8336   1
  -9   5   3 50.5820 32.2393  -2
   8  13  11 50.5820 32.2393   1
 -10   4   2 -24.290 55.2752  -2
   9  13  11 -24.290 55.2752   1
  -2  13  10 200.299 49.4689  -2
   0  14  11 200.299 49.4689   1
  -4  11   8 4.37673 39.3202  -2
   2  14  11 4.37673 39.3202   1
   3  14  11 61.0093 21.6097   1
   4  14  11 163.665 41.9142   1
   5  14  11 124.982 40.8376   1
  -7   8   5 -57.749 56.7184  -2
   6  14  11 -57.749 56.7184   1
  -8   7   4 2.76256 34.6637  -2
   7  14  11 2.76256 34.6637   1
  -9   6   3 34.1768 34.3020  -2
   8  14  11 34.1768 34.3020   1
 -10   5   2 4.18684 33.4041  -2
   9  14  11 4.18684 33.4041   1
 -11   4   1 -8.1214 61.7606  -2
  10  14  11 -8.1214 61.7606   1
   4  15  11 7.23572 18.9965   1
   5  15  11 11.9106 20.3400   1
  -7   9   5 42.2502 63.0840  -2
   6  15  11 42.2502 63.0840   1
  -9   7   3 -9.3820 37.3032  -2
   8  15  11 -9.3820 37.3032   1
 -10   6   2 84.1413 55.9449  -2
   9  15  11 84.1413 55.9449   1
  -4  -9  12 110.767 23.1411   1
   3  -6  15 418.284 36.3193  -2
  -3  -9  12 418.284 36.3193   1
   2  -7  14 65.5853 23.3999  -2
  -2  -9  12 65.5853 23.3999   1
   1  -8  13 -29.266 26.1059  -2
  -1  -9  12 -29.266 26.1059   1
   0  -9  12 47.6473 21.6395  -2
   0  -9  12 47.6473 21.6395   1
  -6  -8  12 17.7715 11.9474   1
   5  -3  17 140.149 30.7169  -2
  -5  -8  12 140.149 30.7169   1
   4  -4  16 126.513 29.4371  -2
  -4  -8  12 126.513 29.4371   1
   3  -5  15 56.8191 27.7391  -2
  -3  -8  12 56.8191 27.7391   1
   2  -6  14 3.46750 26.5173  -2
  -2  -8  12 3.46750 26.5173   1
   1  -7  13 13.5601 25.7580  -2
  -1  -8  12 13.5601 25.7580   1
   0  -8  12 -21.867 25.7583  -2
   0  -8  12 -21.867 25.7583   1
  -1  -9  11 -27.589 21.3060  -2
   1  -8  12 -27.589 21.3060   1
  -2 -10  10 48.6897 27.8435  -2
   2  -8  12 48.6897 27.8435   1
  -3 -11   9 63.7691 26.1665  -2
   3  -8  12 63.7691 26.1665   1
   6  -1  18 131.892 39.1884  -2
  -7  -7  12 131.892 39.1884   1
   5  -2  17 125.791 65.6168  -2
  -6  -7  12 125.791 65.6168   1
   5  -2  17 79.0166 27.3932  -2
  -5  -7  12 79.0166 27.3932   1
   4  -3  16 43.5595 26.3471  -2
  -4  -7  12 43.5595 26.3471   1
   3  -4  15 49.1235 25.8430  -2
  -3  -7  12 49.1235 25.8430   1
   2  -5  14 45.8071 23.7067  -2
  -2  -7  12 45.8071 23.7067   1
   1  -6  13 6.02695 24.7334  -2
  -1  -7  12 6.02695 24.7334   1
   0  -7  12 397.364 32.8725  -2
   0  -7  12 397.364 32.8725   1
  -1  -8  11 35.0124 27.0866  -2
   1  -7  12 35.0124 27.0866   1
  -2  -9  10 -6.2781 26.7404  -2
   2  -7  12 -6.2781 26.7404   1
  -3 -10   9 476.899 37.1502  -2
   3  -7  12 476.899 37.1502   1
  -4 -11   8 308.209 32.5230  -2
   4  -7  12 308.209 32.5230   1
  -5 -12   7 36.4800 29.1534  -2
   5  -7  12 36.4800 29.1534   1
   7   1  19 8.69311 35.4327  -2
  -8  -6  12 8.69311 35.4327   1
   6   0  18 -1.5894 33.0458  -2
  -7  -6  12 -1.5894 33.0458   1
   5  -1  17 12.3175 58.6962  -2
  -6  -6  12 12.3175 58.6962   1
  -5  -6  12 67.5561 11.9606   1
   4  -2  16 121.314 35.7416  -2
  -4  -6  12 121.314 35.7416   1
   3  -3  15 -6.9787 23.2900  -2
  -3  -6  12 -6.9787 23.2900   1
   2  -4  14 349.376 29.5616  -2
  -2  -6  12 349.376 29.5616   1
   1  -5  13 504.853 29.6463  -2
  -1  -6  12 504.853 29.6463   1
   0  -6  12 76.7735 30.8249  -2
   0  -6  12 76.7735 30.8249   1
  -1  -7  11 116.800 38.2996  -2
   1  -6  12 116.800 38.2996   1
  -2  -8  10 -11.587 37.9918  -2
   2  -6  12 -11.587 37.9918   1
  -3  -9   9 -47.313 31.9041  -2
   3  -6  12 -47.313 31.9041   1
  -4 -10   8 3.04605 34.5814  -2
   4  -6  12 3.04605 34.5814   1
  -5 -11   7 1.87818 27.7503  -2
   5  -6  12 1.87818 27.7503   1
  -6 -12   6 -5.1006 27.8486  -2
   6  -6  12 -5.1006 27.8486   1
   7   2  19 -17.227 20.4312  -2
  -8  -5  12 -17.227 20.4312   1
   6   1  18 131.406 27.1975  -2
  -7  -5  12 131.406 27.1975   1
   5   0  17 15.3939 56.2600  -2
  -6  -5  12 15.3939 56.2600   1
   4  -1  16 55.9957 57.8367  -2
  -5  -5  12 55.9957 57.8367   1
   4  -1  16 106.728 34.3787  -2
  -4  -5  12 106.728 34.3787   1
   3  -2  15 284.504 27.0912  -2
  -3  -5  12 284.504 27.0912   1
   2  -3  14 41.0231 21.6857  -2
  -2  -5  12 41.0231 21.6857   1
   1  -4  13 -1.2894 20.7204  -2
  -1  -5  12 -1.2894 20.7204   1
   0  -5  12 123.582 43.9614  -2
   0  -5  12 123.582 43.9614   1
  -1  -6  11 31.7091 33.8451  -2
   1  -5  12 31.7091 33.8451   1
  -2  -7  10 66.5005 32.2675  -2
   2  -5  12 66.5005 32.2675   1
  -3  -8   9 64.8312 27.3158  -2
   3  -5  12 64.8312 27.3158   1
  -4  -9   8 76.4071 28.7139  -2
   4  -5  12 76.4071 28.7139   1
  -5 -10   7 243.928 34.1342  -2
   5  -5  12 243.928 34.1342   1
  -6 -11   6 339.594 36.5537  -2
   6  -5  12 339.594 36.5537   1
  -7 -12   5 67.4644 29.3851  -2
   7  -5  12 67.4644 29.3851   1
   8   4  20 203.030 42.5885  -2
  -9  -4  12 203.030 42.5885   1
   7   3  19 72.5218 22.0527  -2
  -8  -4  12 72.5218 22.0527   1
   6   2  18 57.8409 19.0279  -2
  -7  -4  12 57.8409 19.0279   1
   5   1  17 111.886 33.9885  -2
  -6  -4  12 111.886 33.9885   1
   4   0  16 9.54731 54.4892  -2
  -5  -4  12 9.54731 54.4892   1
   3  -1  15 23.7549 37.8656  -2
  -4  -4  12 23.7549 37.8656   1
  -3  -4  12 13.9265 7.22530   1
   2  -2  14 96.7855 21.0915  -2
  -2  -4  12 96.7855 21.0915   1
   1  -3  13 708.439 35.1779  -2
  -1  -4  12 708.439 35.1779   1
   0  -4  12 245.568 29.3946  -2
   0  -4  12 245.568 29.3946   1
  -1  -5  11 953.370 41.5577  -2
   1  -4  12 953.370 41.5577   1
  -2  -6  10 536.676 35.4703  -2
   2  -4  12 536.676 35.4703   1
  -3  -7   9 9.77864 24.9282  -2
   3  -4  12 9.77864 24.9282   1
  -4  -8   8 101.382 28.2266  -2
   4  -4  12 101.382 28.2266   1
  -5  -9   7 40.4145 27.2806  -2
   5  -4  12 40.4145 27.2806   1
  -6 -10   6 24.0125 27.9160  -2
   6  -4  12 24.0125 27.9160   1
  -7 -11   5 -14.734 40.1575  -2
   7  -4  12 -14.734 40.1575   1
  -8 -12   4 -13.861 48.3180  -2
   8  -4  12 -13.861 48.3180   1
   8   5  20 -1.2621 33.5556  -2
  -9  -3  12 -1.2621 33.5556   1
   7   4  19 104.792 30.4346  -2
  -8  -3  12 104.792 30.4346   1
   6   3  18 113.288 20.1820  -2
  -7  -3  12 113.288 20.1820   1
   5   2  17 38.2605 22.8068  -2
  -6  -3  12 38.2605 22.8068   1
   4   1  16 13.2399 51.1516  -2
  -5  -3  12 13.2399 51.1516   1
   3   0  15 33.3743 30.3051  -2
  -4  -3  12 33.3743 30.3051   1
   2  -1  14 -52.136 35.9764  -2
  -3  -3  12 -52.136 35.9764   1
  -2  -3  12 317.904 18.6634   1
  -1  -3  12 30.0873 9.19866   1
   0  -3  12 447.694 38.2641   1
  -1  -4  11 190.545 26.3727  -2
   1  -3  12 190.545 26.3727   1
  -2  -5  10 86.8570 26.5250  -2
   2  -3  12 86.8570 26.5250   1
  -3  -6   9 335.334 31.6162  -2
   3  -3  12 335.334 31.6162   1
  -4  -7   8 316.135 31.7432  -2
   4  -3  12 316.135 31.7432   1
  -5  -8   7 92.0504 28.3378  -2
   5  -3  12 92.0504 28.3378   1
  -6  -9   6 -26.412 27.1769  -2
   6  -3  12 -26.412 27.1769   1
  -7 -10   5 -32.600 34.9229  -2
   7  -3  12 -32.600 34.9229   1
  -8 -11   4 -46.803 90.1508  -2
   8  -3  12 -46.803 90.1508   1
  -9 -12   3 -41.740 124.353  -2
   9  -3  12 -41.740 124.353   1
   8   6  20 46.2241 41.1084  -2
  -9  -2  12 46.2241 41.1084   1
   7   5  19 43.8756 25.5407  -2
  -8  -2  12 43.8756 25.5407   1
   6   4  18 131.478 20.8971  -2
  -7  -2  12 131.478 20.8971   1
   5   3  17 70.3591 19.2702  -2
  -6  -2  12 70.3591 19.2702   1
   4   2  16 301.190 64.4952  -2
  -5  -2  12 301.190 64.4952   1
   3   1  15 332.508 24.5188  -2
  -4  -2  12 332.508 24.5188   1
   2   0  14 109.171 134.142  -2
  -3  -2  12 109.171 134.142   1
   1  -1  13 231.674 125.492  -2
  -2  -2  12 231.674 125.492   1
  -1  -2  12 43.5994 10.6076   1
   0  -2  12 -74.434 97.8190  -2
   0  -2  12 -74.434 97.8190   1
  -1  -3  11 535.830 30.8759  -2
   1  -2  12 535.830 30.8759   1
  -2  -4  10 116.807 24.1153  -2
   2  -2  12 116.807 24.1153   1
  -3  -5   9 135.286 27.3072  -2
   3  -2  12 135.286 27.3072   1
  -4  -6   8 1.17613 39.2390  -2
   4  -2  12 1.17613 39.2390   1
  -5  -7   7 97.2066 28.7798  -2
   5  -2  12 97.2066 28.7798   1
  -6  -8   6 -37.505 38.4114  -2
   6  -2  12 -37.505 38.4114   1
  -7  -9   5 -22.329 27.0351  -2
   7  -2  12 -22.329 27.0351   1
  -8 -10   4 19.5104 42.1283  -2
   8  -2  12 19.5104 42.1283   1
  -9 -11   3 -68.986 92.5545  -2
   9  -2  12 -68.986 92.5545   1
 -10 -12   2 -118.04 123.119  -2
  10  -2  12 -118.04 123.119   1
   8   7  20 336.239 52.8057  -2
  -9  -1  12 336.239 52.8057   1
   7   6  19 264.973 27.9464  -2
  -8  -1  12 264.973 27.9464   1
   6   5  18 389.839 27.7563  -2
  -7  -1  12 389.839 27.7563   1
   5   4  17 308.492 21.0578  -2
  -6  -1  12 308.492 21.0578   1
   4   3  16 1.85927 20.3651  -2
  -5  -1  12 1.85927 20.3651   1
   3   2  15 372.564 18.6618  -2
  -4  -1  12 372.564 18.6618   1
   2   1  14 1216.79 39.7635  -2
  -3  -1  12 1216.79 39.7635   1
   1   0  13 56.1691 109.918  -2
  -2  -1  12 56.1691 109.918   1
  -1  -1  12 -2.4728 5.30041   1
   0  -1  12 -0.2174 5.33204   1
   1  -1  12 40.7266 6.53497   1
  -2  -3  10 108.095 22.6279  -2
   2  -1  12 108.095 22.6279   1
  -3  -4   9 577.938 48.0713  -2
   3  -1  12 577.938 48.0713   1
  -4  -5   8 605.285 34.8218  -2
   4  -1  12 605.285 34.8218   1
  -5  -6   7 1153.74 46.4458  -2
   5  -1  12 1153.74 46.4458   1
  -6  -7   6 711.926 38.4725  -2
   6  -1  12 711.926 38.4725   1
  -7  -8   5 167.008 43.5481  -2
   7  -1  12 167.008 43.5481   1
  -8  -9   4 23.0752 40.2826  -2
   8  -1  12 23.0752 40.2826   1
 -10 -11   2 1.06098 94.3545  -2
  10  -1  12 1.06098 94.3545   1
 -11 -12   1 -10.742 125.462  -2
  11  -1  12 -10.742 125.462   1
   7   7  19 214.310 48.5119  -2
  -8   0  12 214.310 48.5119   1
   6   6  18 24.9888 19.4699  -2
  -7   0  12 24.9888 19.4699   1
   5   5  17 75.7788 27.1956  -2
  -6   0  12 75.7788 27.1956   1
   4   4  16 3.19889 22.2217  -2
  -5   0  12 3.19889 22.2217   1
   3   3  15 -6.6418 16.4263  -2
  -4   0  12 -6.6418 16.4263   1
   2   2  14 193.299 117.551  -2
  -3   0  12 193.299 117.551   1
   1   1  13 28.1936 105.751  -2
  -2   0  12 28.1936 105.751   1
   0   0  12 18.9594 100.152  -2
  -1   0  12 18.9594 100.152   1
   0   0  12 39.6089 5.99689   1
   1   0  12 88.5892 12.3152   1
  -3  -2  10 -5.5356 107.339  -2
   2   0  12 -5.5356 107.339   1
   3   0  12 12.4858 6.77073   1
  -4  -4   8 215.022 37.5383  -2
   4   0  12 215.022 37.5383   1
   5   0  12 231.150 28.5856   1
  -6  -6   6 261.488 28.3035  -2
   6   0  12 261.488 28.3035   1
  -7  -7   5 -36.318 35.0448  -2
   7   0  12 -36.318 35.0448   1
  -8  -8   4 171.663 43.6015  -2
   8   0  12 171.663 43.6015   1
  -9  -9   3 100.541 42.6161  -2
   9   0  12 100.541 42.6161   1
 -10 -10   2 -13.428 87.6032  -2
  10   0  12 -13.428 87.6032   1
 -11 -11   1 -51.578 89.6793  -2
  11   0  12 -51.578 89.6793   1
   6   7  18 50.8788 64.6886  -2
  -7   1  12 50.8788 64.6886   1
   5   6  17 16.8957 20.7776  -2
  -6   1  12 16.8957 20.7776   1
   4   5  16 14.9589 19.8619  -2
  -5   1  12 14.9589 19.8619   1
   3   4  15 402.573 19.4249  -2
  -4   1  12 402.573 19.4249   1
   2   3  14 1105.80 37.6265  -2
  -3   1  12 1105.80 37.6265   1
   1   2  13 370.532 37.7580  -2
  -2   1  12 370.532 37.7580   1
   0   1  12 458.653 17.0359   1
   1   1  12 476.443 18.9454   1
   2   1  12 278.663 15.6392   1
  -4  -2   9 252.117 90.2212  -2
   3   1  12 252.117 90.2212   1
  -5  -3   8 89.5049 83.6253  -2
   4   1  12 89.5049 83.6253   1
  -5  -4   7 -47.964 83.8585  -2
   5   1  12 -47.964 83.8585   1
   6   1  12 30.6430 13.9935   1
  -7  -6   5 114.001 36.6617  -2
   7   1  12 114.001 36.6617   1
  -9  -8   3 102.062 41.4184  -2
   9   1  12 102.062 41.4184   1
  12  11   0 -12.964 87.0775  -2
  12   1  12 -12.964 87.0775   1
   7   9  19 85.6022 86.5626  -2
  -8   2  12 85.6022 86.5626   1
   6   8  18 40.0018 72.0439  -2
  -7   2  12 40.0018 72.0439   1
   5   7  17 119.409 64.7922  -2
  -6   2  12 119.409 64.7922   1
   4   6  16 74.7482 27.4083  -2
  -5   2  12 74.7482 27.4083   1
   3   5  15 361.497 20.7558  -2
  -4   2  12 361.497 20.7558   1
  -3   2  12 36.5112 4.61402   1
   1   3  13 142.057 106.962  -2
  -2   2  12 142.057 106.962   1
   0   2  12 -62.539 97.7129  -2
  -1   2  12 -62.539 97.7129   1
   0   2  12 125.383 9.63010   1
   1   2  12 341.877 16.1124   1
  -3   0  10 7.13713 81.5600  -2
   2   2  12 7.13713 81.5600   1
  -4  -1   9 -19.712 74.5494  -2
   3   2  12 -19.712 74.5494   1
   4   2  12 4.98618 5.48664   1
   5   2  12 25.6077 7.35643   1
  -6  -4   6 -43.137 84.5213  -2
   6   2  12 -43.137 84.5213   1
  -7  -5   5 116.294 34.5499  -2
   7   2  12 116.294 34.5499   1
  -8  -6   4 758.602 51.8990  -2
   8   2  12 758.602 51.8990   1
  -9  -7   3 654.517 52.5945  -2
   9   2  12 654.517 52.5945   1
   6   9  18 403.014 88.5061  -2
  -7   3  12 403.014 88.5061   1
   5   8  17 508.019 81.8198  -2
  -6   3  12 508.019 81.8198   1
   4   7  16 122.334 60.0421  -2
  -5   3  12 122.334 60.0421   1
   3   6  15 169.860 29.1160  -2
  -4   3  12 169.860 29.1160   1
  -3   3  12 -1.3891 3.81764   1
   1   4  13 -14.665 91.6265  -2
  -2   3  12 -14.665 91.6265   1
   0   3  12 -49.985 84.7700  -2
  -1   3  12 -49.985 84.7700   1
   0   3  12 0.00965 3.51919   1
   1   3  12 13.5644 4.24188   1
   2   3  12 7.55876 5.33465   1
  -4   0   9 19.8169 69.3568  -2
   3   3  12 19.8169 69.3568   1
  -5  -1   8 202.862 32.2776  -2
   4   3  12 202.862 32.2776   1
   5   3  12 12.3809 6.02690   1
   6   3  12 222.427 15.9120   1
   7   3  12 290.076 18.5487   1
  -8  -5   4 -73.436 103.618  -2
   8   3  12 -73.436 103.618   1
  -9  -6   3 50.6793 34.5192  -2
   9   3  12 50.6793 34.5192   1
 -10  -7   3 167.222 42.9491  -2
  10   3  12 167.222 42.9491   1
  -7   4  12 55.8807 43.4712   1
  -6   4  12 68.9920 35.7752   1
   4   8  16 -2.7409 57.1574  -2
  -5   4  12 -2.7409 57.1574   1
   3   7  15 11.6353 50.9417  -2
  -4   4  12 11.6353 50.9417   1
  -3   4  12 34.3767 7.83149   1
  -2   4  12 94.9215 12.7106   1
  -1   4  12 0.59580 4.42738   1
   0   4  12 24.4861 5.00807   1
   1   4  12 1181.22 29.8849   1
   2   4  12 1155.08 29.5303   1
   3   4  12 733.471 22.2116   1
  -5   0   8 113.747 28.7206  -2
   4   4  12 113.747 28.7206   1
  -6  -1   7 274.922 35.7627  -2
   5   4  12 274.922 35.7627   1
   6   4  12 331.047 17.9973   1
   7   4  12 -5.5295 6.43173   1
   8   4  12 -2.8221 8.15423   1
   9   4  12 14.0462 7.80040   1
  10   4  12 -1.0295 16.5685   1
   2   8  15 175.711 38.1407  -2
  -4   5  12 175.711 38.1407   1
   1   7  14 935.739 58.4359  -2
  -3   5  12 935.739 58.4359   1
  -2   5  12 66.3916 12.8869   1
  -1   5  12 31.6359 7.59617   1
   0   5  12 306.306 20.2119   1
   1   5  12 361.029 20.8092   1
   2   5  12 -2.3271 4.04666   1
   3   5  12 17.6135 4.84668   1
   4   5  12 -5.8897 4.27758   1
   5   5  12 148.581 13.2227   1
   6   5  12 43.5511 6.43593   1
   7   5  12 57.0581 9.84542   1
   8   5  12 17.2951 6.27933   1
   9   5  12 9.73742 7.73238   1
  10   5  12 103.261 31.0560   1
  11   5  12 27.6703 19.6175   1
 -12  -7   1 -38.256 46.7871  -2
  12   5  12 -38.256 46.7871   1
  -4   6  12 17.7847 14.5118   1
   1   8  14 98.5060 34.4113  -2
  -3   6  12 98.5060 34.4113   1
   0   7  13 576.992 46.5817  -2
  -2   6  12 576.992 46.5817   1
  -1   6  12 198.678 20.6743   1
   0   6  12 141.934 17.4738   1
   1   6  12 67.3006 11.6391   1
   2   6  12 62.8827 12.1238   1
   3   6  12 76.8482 9.78635   1
  -5   2   8 -18.267 30.4318  -2
   4   6  12 -18.267 30.4318   1
  -6   1   7 102.012 31.9965  -2
   5   6  12 102.012 31.9965   1
   6   6  12 434.264 19.9570   1
  -8  -1   5 377.425 44.6554  -2
   7   6  12 377.425 44.6554   1
   8   6  12 110.745 15.1448   1
   9   6  12 78.9855 11.1964   1
  10   6  12 18.2971 11.8396   1
  11   6  12 73.9529 21.5699   1
  12   6  12 150.905 36.2743   1
   3  11  16 241.981 47.0200  -2
  -5   7  12 241.981 47.0200   1
   2  10  15 -9.5396 28.5925  -2
  -4   7  12 -9.5396 28.5925   1
   1   9  14 37.0941 26.9067  -2
  -3   7  12 37.0941 26.9067   1
   0   8  13 65.3492 32.8013  -2
  -2   7  12 65.3492 32.8013   1
  -1   7  12 -0.7333 7.03349   1
   0   7  12 -1.6243 6.42098   1
   1   7  12 274.102 21.8700   1
   2   7  12 3.89570 6.09907   1
  -4   4   9 384.858 45.5143  -2
   3   7  12 384.858 45.5143   1
  -5   3   8 64.4718 35.8322  -2
   4   7  12 64.4718 35.8322   1
  -6   2   7 330.234 39.1192  -2
   5   7  12 330.234 39.1192   1
  -7   1   6 958.655 56.8452  -2
   6   7  12 958.655 56.8452   1
  -8   0   5 1245.51 66.1232  -2
   7   7  12 1245.51 66.1232   1
  -9  -1   4 139.299 40.8238  -2
   8   7  12 139.299 40.8238   1
   9   7  12 0.35981 6.75171   1
  10   7  12 35.8179 12.8191   1
  11   7  12 4.02558 15.9817   1
  12   7  12 -0.6853 16.6380   1
  13   7  12 1.49922 17.9873   1
   4  13  17 41.2995 43.9068  -2
  -6   8  12 41.2995 43.9068   1
   3  12  16 -15.736 41.3736  -2
  -5   8  12 -15.736 41.3736   1
   2  11  15 26.7507 28.8906  -2
  -4   8  12 26.7507 28.8906   1
   1  10  14 12.6685 27.4540  -2
  -3   8  12 12.6685 27.4540   1
   0   9  13 351.001 33.1483  -2
  -2   8  12 351.001 33.1483   1
  -1   8  12 11.0202 28.9704  -2
  -1   8  12 11.0202 28.9704   1
  -2   7  11 102.974 29.3461  -2
   0   8  12 102.974 29.3461   1
   1   8  12 142.911 19.5961   1
   2   8  12 453.848 26.7450   1
   3   8  12 171.025 19.7681   1
  -5   4   8 31.9823 24.3095  -2
   4   8  12 31.9823 24.3095   1
  -6   3   7 288.831 20.7709  -2
   5   8  12 288.831 20.7709   1
  -7   2   6 69.6586 25.1982  -2
   6   8  12 69.6586 25.1982   1
  -8   1   5 96.0949 22.1932  -2
   7   8  12 96.0949 22.1932   1
  -9   0   4 -17.346 22.1215  -2
   8   8  12 -17.346 22.1215   1
 -10  -1   3 -2.2190 27.1948  -2
   9   8  12 -2.2190 27.1948   1
 -11  -2   2 -4.5110 45.1821  -2
  10   8  12 -4.5110 45.1821   1
  11   8  12 -2.3669 17.3060   1
  12   8  12 -9.6045 13.1057   1
  13   8  12 1.85630 19.0495   1
   3  13  16 53.0074 43.7253  -2
  -5   9  12 53.0074 43.7253   1
   2  12  15 42.4141 29.9148  -2
  -4   9  12 42.4141 29.9148   1
   1  11  14 56.7702 29.1755  -2
  -3   9  12 56.7702 29.1755   1
   0  10  13 339.609 34.2847  -2
  -2   9  12 339.609 34.2847   1
  -1   9  12 146.094 28.5232  -2
  -1   9  12 146.094 28.5232   1
  -2   8  11 142.974 33.5510  -2
   0   9  12 142.974 33.5510   1
  -3   7  10 51.2211 31.4625  -2
   1   9  12 51.2211 31.4625   1
   2   9  12 148.481 20.1792   1
   3   9  12 -8.7448 6.37872   1
  -5   5   8 51.4608 25.2704  -2
   4   9  12 51.4608 25.2704   1
  -6   4   7 63.0099 25.8532  -2
   5   9  12 63.0099 25.8532   1
  -7   3   6 73.3558 20.1088  -2
   6   9  12 73.3558 20.1088   1
  -8   2   5 411.376 26.7086  -2
   7   9  12 411.376 26.7086   1
  -9   1   4 468.888 29.0877  -2
   8   9  12 468.888 29.0877   1
 -10   0   3 42.9733 24.0075  -2
   9   9  12 42.9733 24.0075   1
  13   9  12 -23.044 21.1353   1
   2  13  15 64.6022 42.1733  -2
  -4  10  12 64.6022 42.1733   1
   1  12  14 54.3643 30.0849  -2
  -3  10  12 54.3643 30.0849   1
   0  11  13 120.425 31.3230  -2
  -2  10  12 120.425 31.3230   1
  -1  10  12 160.840 30.8665  -2
  -1  10  12 160.840 30.8665   1
  -2   9  11 -11.461 25.7484  -2
   0  10  12 -11.461 25.7484   1
  -3   8  10 52.0759 32.9262  -2
   1  10  12 52.0759 32.9262   1
   2  10  12 1.42491 13.6505   1
   3  10  12 120.441 32.0427   1
  -5   6   8 97.7602 44.6683  -2
   4  10  12 97.7602 44.6683   1
  -6   5   7 169.820 29.2507  -2
   5  10  12 169.820 29.2507   1
  -7   4   6 362.262 32.7255  -2
   6  10  12 362.262 32.7255   1
  -8   3   5 238.827 24.2383  -2
   7  10  12 238.827 24.2383   1
  -9   2   4 -27.826 22.3391  -2
   8  10  12 -27.826 22.3391   1
 -10   1   3 -5.0968 23.9539  -2
   9  10  12 -5.0968 23.9539   1
   1  13  14 17.1454 29.0992  -2
  -3  11  12 17.1454 29.0992   1
   0  12  13 -14.360 27.8785  -2
  -2  11  12 -14.360 27.8785   1
  -1  11  12 142.677 30.6007  -2
  -1  11  12 142.677 30.6007   1
  -2  10  11 94.3066 29.1853  -2
   0  11  12 94.3066 29.1853   1
   1  11  12 28.5745 17.5659   1
   2  11  12 43.7205 17.3575   1
   3  11  12 208.172 36.1352   1
  -5   7   8 357.471 53.7229  -2
   4  11  12 357.471 53.7229   1
  -6   6   7 273.297 33.2007  -2
   5  11  12 273.297 33.2007   1
  -7   5   6 187.022 31.5061  -2
   6  11  12 187.022 31.5061   1
  -8   4   5 13.0357 28.9467  -2
   7  11  12 13.0357 28.9467   1
  -9   3   4 -43.236 28.5684  -2
   8  11  12 -43.236 28.5684   1
 -10   2   3 -3.0488 37.5710  -2
   9  11  12 -3.0488 37.5710   1
   0  13  13 136.406 32.4466  -2
  -2  12  12 136.406 32.4466   1
  -1  12  12 236.406 34.4000  -2
  -1  12  12 236.406 34.4000   1
  -2  11  11 206.347 33.7930  -2
   0  12  12 206.347 33.7930   1
  -3  10  10 98.0906 54.6663  -2
   1  12  12 98.0906 54.6663   1
   2  12  12 28.0034 19.2092   1
   3  12  12 38.0632 19.3497   1
   4  12  12 141.123 34.8563   1
  -6   7   7 217.940 50.7286  -2
   5  12  12 217.940 50.7286   1
  -7   6   6 146.834 32.1727  -2
   6  12  12 146.834 32.1727   1
  -8   5   5 141.460 32.6196  -2
   7  12  12 141.460 32.6196   1
  -9   4   4 6.83574 30.1676  -2
   8  12  12 6.83574 30.1676   1
 -10   3   3 7.27440 38.7817  -2
   9  12  12 7.27440 38.7817   1
  -1  13  12 38.4739 31.8003  -2
  -1  13  12 38.4739 31.8003   1
  -2  12  11 61.3593 29.1669  -2
   0  13  12 61.3593 29.1669   1
  -3  11  10 2.52564 39.9505  -2
   1  13  12 2.52564 39.9505   1
  -4  10   9 -4.3503 37.7340  -2
   2  13  12 -4.3503 37.7340   1
   3  13  12 -7.2590 16.9303   1
   4  13  12 -2.5484 17.0094   1
  -6   8   7 109.402 54.8072  -2
   5  13  12 109.402 54.8072   1
  -7   7   6 132.957 51.6483  -2
   6  13  12 132.957 51.6483   1
  -8   6   5 360.562 37.9678  -2
   7  13  12 360.562 37.9678   1
  -9   5   4 139.060 34.4136  -2
   8  13  12 139.060 34.4136   1
 -10   4   3 143.669 33.8210  -2
   9  13  12 143.669 33.8210   1
 -11   3   2 -33.945 53.8919  -2
  10  13  12 -33.945 53.8919   1
  -4  11   9 2.57248 42.1913  -2
   2  14  12 2.57248 42.1913   1
  -5  10   8 125.609 43.3421  -2
   3  14  12 125.609 43.3421   1
   4  14  12 57.0233 23.1454   1
   5  14  12 58.9514 23.1840   1
  -7   8   6 126.077 57.1396  -2
   6  14  12 126.077 57.1396   1
  -8   7   5 20.6361 49.5209  -2
   7  14  12 20.6361 49.5209   1
  -9   6   4 98.5068 35.9299  -2
   8  14  12 98.5068 35.9299   1
 -10   5   3 266.127 38.8372  -2
   9  14  12 266.127 38.8372   1
  11  14  12 -9.0155 18.7976   1
   5  15  12 2.98895 20.5572   1
   6  15  12 -2.2095 19.1574   1
  -8   8   5 18.6855 56.3864  -2
   7  15  12 18.6855 56.3864   1
  -9   7   4 -9.4511 36.2864  -2
   8  15  12 -9.4511 36.2864   1
 -10   6   3 -23.227 53.7244  -2
   9  15  12 -23.227 53.7244   1
  -4  -8  13 12.5758 10.5733   1
   3  -5  16 304.842 34.5593  -2
  -3  -8  13 304.842 34.5593   1
   2  -6  15 39.1236 27.4049  -2
  -2  -8  13 39.1236 27.4049   1
   1  -7  14 -25.752 27.7091  -2
  -1  -8  13 -25.752 27.7091   1
   0  -8  13 30.1698 24.3452  -2
   0  -8  13 30.1698 24.3452   1
  -1  -9  12 -22.969 28.3352  -2
   1  -8  13 -22.969 28.3352   1
   5  -2  18 158.735 69.4270  -2
  -6  -7  13 158.735 69.4270   1
  -5  -7  13 197.745 35.6461   1
   4  -3  17 164.777 30.4614  -2
  -4  -7  13 164.777 30.4614   1
   3  -4  16 38.1282 27.7691  -2
  -3  -7  13 38.1282 27.7691   1
   2  -5  15 171.088 31.2838  -2
  -2  -7  13 171.088 31.2838   1
   1  -6  14 78.7234 28.3643  -2
  -1  -7  13 78.7234 28.3643   1
   0  -7  13 -21.495 28.1456  -2
   0  -7  13 -21.495 28.1456   1
  -1  -8  12 -21.813 40.8527  -2
   1  -7  13 -21.813 40.8527   1
  -2  -9  11 -63.918 37.2322  -2
   2  -7  13 -63.918 37.2322   1
  -3 -10  10 5.58085 36.6005  -2
   3  -7  13 5.58085 36.6005   1
  -4 -11   9 -10.587 36.3534  -2
   4  -7  13 -10.587 36.3534   1
   6   0  19 132.053 38.4966  -2
  -7  -6  13 132.053 38.4966   1
   5  -1  18 22.0296 63.7773  -2
  -6  -6  13 22.0296 63.7773   1
   4  -2  17 113.720 61.5491  -2
  -5  -6  13 113.720 61.5491   1
  -4  -6  13 5.75742 8.83941   1
   3  -3  16 44.1025 24.7623  -2
  -3  -6  13 44.1025 24.7623   1
   2  -4  15 28.9610 35.2645  -2
  -2  -6  13 28.9610 35.2645   1
   1  -5  14 28.7634 26.5041  -2
  -1  -6  13 28.7634 26.5041   1
   0  -6  13 -12.401 38.3101  -2
   0  -6  13 -12.401 38.3101   1
  -1  -7  12 -11.797 38.0685  -2
   1  -6  13 -11.797 38.0685   1
  -2  -8  11 -34.892 36.6515  -2
   2  -6  13 -34.892 36.6515   1
  -3  -9  10 320.571 34.1489  -2
   3  -6  13 320.571 34.1489   1
  -4 -10   9 116.695 34.0417  -2
   4  -6  13 116.695 34.0417   1
  -5 -11   8 5.00347 48.3077  -2
   5  -6  13 5.00347 48.3077   1
   6   1  19 5.64719 18.2540  -2
  -7  -5  13 5.64719 18.2540   1
   5   0  18 9.13835 133.086  -2
  -6  -5  13 9.13835 133.086   1
   4  -1  17 12.6373 58.9611  -2
  -5  -5  13 12.6373 58.9611   1
  -4  -5  13 2.20070 9.52389   1
   3  -2  16 51.0468 24.0105  -2
  -3  -5  13 51.0468 24.0105   1
   2  -3  15 173.047 25.9666  -2
  -2  -5  13 173.047 25.9666   1
   1  -4  14 148.439 24.5136  -2
  -1  -5  13 148.439 24.5136   1
   0  -5  13 144.481 32.2728  -2
   0  -5  13 144.481 32.2728   1
  -1  -6  12 423.948 36.9836  -2
   1  -5  13 423.948 36.9836   1
  -2  -7  11 396.441 36.2682  -2
   2  -5  13 396.441 36.2682   1
  -3  -8  10 -46.483 34.6178  -2
   3  -5  13 -46.483 34.6178   1
  -4  -9   9 -45.851 37.3601  -2
   4  -5  13 -45.851 37.3601   1
  -5 -10   8 -22.660 30.7363  -2
   5  -5  13 -22.660 30.7363   1
  -6 -11   7 -45.288 39.3976  -2
   6  -5  13 -45.288 39.3976   1
  -7 -12   6 -19.958 40.1143  -2
   7  -5  13 -19.958 40.1143   1
   7   3  20 18.4918 21.5858  -2
  -8  -4  13 18.4918 21.5858   1
   6   2  19 75.4758 19.7385  -2
  -7  -4  13 75.4758 19.7385   1
   5   1  18 29.4916 24.0151  -2
  -6  -4  13 29.4916 24.0151   1
   4   0  17 65.3845 56.8123  -2
  -5  -4  13 65.3845 56.8123   1
   3  -1  16 207.506 36.6584  -2
  -4  -4  13 207.506 36.6584   1
   2  -2  15 306.380 48.2966  -2
  -3  -4  13 306.380 48.2966   1
   2  -2  15 113.907 23.3510  -2
  -2  -4  13 113.907 23.3510   1
   1  -3  14 268.579 27.2186  -2
  -1  -4  13 268.579 27.2186   1
   0  -4  13 379.214 34.1185  -2
   0  -4  13 379.214 34.1185   1
  -1  -5  12 5.89891 27.7877  -2
   1  -4  13 5.89891 27.7877   1
  -2  -6  11 12.6821 27.8819  -2
   2  -4  13 12.6821 27.8819   1
  -3  -7  10 40.2522 34.3552  -2
   3  -4  13 40.2522 34.3552   1
  -4  -8   9 -8.3667 35.6956  -2
   4  -4  13 -8.3667 35.6956   1
  -5  -9   8 97.6242 31.8932  -2
   5  -4  13 97.6242 31.8932   1
  -6 -10   7 121.878 33.7057  -2
   6  -4  13 121.878 33.7057   1
  -7 -11   6 77.6565 32.9646  -2
   7  -4  13 77.6565 32.9646   1
  -8 -12   5 -21.526 41.4676  -2
   8  -4  13 -21.526 41.4676   1
   7   4  20 127.440 50.5764  -2
  -8  -3  13 127.440 50.5764   1
   6   3  19 35.2710 19.8681  -2
  -7  -3  13 35.2710 19.8681   1
   5   2  18 144.471 19.1820  -2
  -6  -3  13 144.471 19.1820   1
   4   1  17 239.664 35.7067  -2
  -5  -3  13 239.664 35.7067   1
   3   0  16 40.6861 32.0042  -2
  -4  -3  13 40.6861 32.0042   1
   2  -1  15 39.8947 32.8044  -2
  -3  -3  13 39.8947 32.8044   1
  -2  -3  13 16.0823 7.78314   1
  -1  -3  13 28.5576 8.09194   1
  -1  -3  13 208.515 41.2779  -2
   0  -3  13 208.515 41.2779   1
   0  -3  13 205.993 35.1954  -2
   0  -3  13 205.993 35.1954   1
  -1  -4  12 664.131 49.7103  -2
   1  -3  13 664.131 49.7103   1
  -2  -5  11 490.095 35.2601  -2
   2  -3  13 490.095 35.2601   1
  -3  -6  10 45.1789 27.7884  -2
   3  -3  13 45.1789 27.7884   1
  -4  -7   9 33.6272 28.1380  -2
   4  -3  13 33.6272 28.1380   1
  -5  -8   8 293.091 33.5512  -2
   5  -3  13 293.091 33.5512   1
  -6  -9   7 29.4015 29.7638  -2
   6  -3  13 29.4015 29.7638   1
  -7 -10   6 -4.3947 43.7476  -2
   7  -3  13 -4.3947 43.7476   1
  -8 -11   5 138.644 52.9792  -2
   8  -3  13 138.644 52.9792   1
  -9 -12   4 -15.613 100.433  -2
   9  -3  13 -15.613 100.433   1
   7   5  20 120.089 38.0260  -2
  -8  -2  13 120.089 38.0260   1
   6   4  19 293.179 31.4682  -2
  -7  -2  13 293.179 31.4682   1
   5   3  18 75.0575 23.3096  -2
  -6  -2  13 75.0575 23.3096   1
   4   2  17 74.8117 122.831  -2
  -5  -2  13 74.8117 122.831   1
   3   1  16 9.12649 28.5615  -2
  -4  -2  13 9.12649 28.5615   1
   2   0  15 177.929 33.0874  -2
  -3  -2  13 177.929 33.0874   1
   1  -1  14 -5.6113 36.7966  -2
  -2  -2  13 -5.6113 36.7966   1
  -1  -2  13 92.2297 17.5870   1
   0  -2  13 326.460 23.2057   1
  -1  -3  12 219.659 34.5625  -2
   1  -2  13 219.659 34.5625   1
  -2  -4  11 45.2878 25.8119  -2
   2  -2  13 45.2878 25.8119   1
  -3  -5  10 876.029 41.9309  -2
   3  -2  13 876.029 41.9309   1
  -5  -7   8 -19.720 27.9302  -2
   5  -2  13 -19.720 27.9302   1
  -6  -8   7 -6.6225 40.8622  -2
   6  -2  13 -6.6225 40.8622   1
  -7  -9   6 -37.933 42.8638  -2
   7  -2  13 -37.933 42.8638   1
  -8 -10   5 -83.627 115.445  -2
   8  -2  13 -83.627 115.445   1
  -9 -11   4 2.39769 97.2796  -2
   9  -2  13 2.39769 97.2796   1
 -10 -12   3 -77.132 100.648  -2
  10  -2  13 -77.132 100.648   1
   7   6  20 43.2783 31.5101  -2
  -8  -1  13 43.2783 31.5101   1
   6   5  19 86.4973 21.9179  -2
  -7  -1  13 86.4973 21.9179   1
   5   4  18 -5.5845 25.1945  -2
  -6  -1  13 -5.5845 25.1945   1
   4   3  17 -2.4818 19.6022  -2
  -5  -1  13 -2.4818 19.6022   1
   3   2  16 112.971 21.5862  -2
  -4  -1  13 112.971 21.5862   1
   2   1  15 304.949 28.9248  -2
  -3  -1  13 304.949 28.9248   1
   1   0  14 579.463 47.6979  -2
  -2  -1  13 579.463 47.6979   1
   0  -1  13 21.1181 124.527  -2
  -1  -1  13 21.1181 124.527   1
   0  -1  13 0.73118 6.02717   1
   1  -1  13 852.064 28.0098   1
  -3  -3  11 327.365 43.6702  -2
   2  -1  13 327.365 43.6702   1
   3  -1  13 86.7274 24.9752   1
  -4  -5   9 82.0918 27.5145  -2
   4  -1  13 82.0918 27.5145   1
  -5  -6   8 1.45179 27.5326  -2
   5  -1  13 1.45179 27.5326   1
  -6  -7   7 -47.905 27.8592  -2
   6  -1  13 -47.905 27.8592   1
  -7  -8   6 21.1153 43.7551  -2
   7  -1  13 21.1153 43.7551   1
  -8  -9   5 31.7434 43.3227  -2
   8  -1  13 31.7434 43.3227   1
  -9 -10   4 29.5988 45.9318  -2
   9  -1  13 29.5988 45.9318   1
 -10 -11   3 22.6485 99.1615  -2
  10  -1  13 22.6485 99.1615   1
   6   6  19 355.014 32.7292  -2
  -7   0  13 355.014 32.7292   1
   5   5  18 135.952 30.0892  -2
  -6   0  13 135.952 30.0892   1
   4   4  17 46.8203 21.0923  -2
  -5   0  13 46.8203 21.0923   1
   3   3  16 1033.75 29.4991  -2
  -4   0  13 1033.75 29.4991   1
   2   2  15 308.395 22.7490  -2
  -3   0  13 308.395 22.7490   1
   1   1  14 275.135 136.667  -2
  -2   0  13 275.135 136.667   1
   0   0  13 62.6570 114.171  -2
  -1   0  13 62.6570 114.171   1
   0   0  13 85.0611 13.0353   1
   1   0  13 51.5590 8.09748   1
   2   0  13 30.6171 7.28190   1
  -4  -3  10 95.7728 35.6617  -2
   3   0  13 95.7728 35.6617   1
   4   0  13 430.008 21.3778   1
   5   0  13 117.935 16.8907   1
   6   0  13 8.05801 14.2023   1
  -7  -7   6 -51.176 38.9788  -2
   7   0  13 -51.176 38.9788   1
  -8  -8   5 -4.6778 41.5887  -2
   8   0  13 -4.6778 41.5887   1
 -11 -11   2 22.1980 96.6521  -2
  11   0  13 22.1980 96.6521   1
   6   7  19 -46.501 67.0928  -2
  -7   1  13 -46.501 67.0928   1
   5   6  18 97.2974 37.4797  -2
  -6   1  13 97.2974 37.4797   1
   4   5  17 60.0305 39.5023  -2
  -5   1  13 60.0305 39.5023   1
   3   4  16 8.94407 14.5510  -2
  -4   1  13 8.94407 14.5510   1
   2   3  15 368.772 21.8799  -2
  -3   1  13 368.772 21.8799   1
   1   2  14 -9.5370 110.552  -2
  -2   1  13 -9.5370 110.552   1
   0   1  13 2.68138 107.319  -2
  -1   1  13 2.68138 107.319   1
   0   1  13 33.3074 6.32036   1
  -2   0  12 134.187 31.5216  -2
   1   1  13 134.187 31.5216   1
   2   1  13 88.7463 13.0854   1
  -4  -2  10 -73.173 97.3056  -2
   3   1  13 -73.173 97.3056   1
  -5  -3   9 324.036 29.4788  -2
   4   1  13 324.036 29.4788   1
  -6  -4   8 424.800 43.7377  -2
   5   1  13 424.800 43.7377   1
   6   1  13 214.322 18.4350   1
  -7  -6   6 38.4334 36.7074  -2
   7   1  13 38.4334 36.7074   1
  -8  -7   5 277.588 46.1541  -2
   8   1  13 277.588 46.1541   1
  -9  -8   4 123.959 44.7974  -2
   9   1  13 123.959 44.7974   1
   6   8  19 56.5042 76.5424  -2
  -7   2  13 56.5042 76.5424   1
   5   7  18 60.4772 65.5660  -2
  -6   2  13 60.4772 65.5660   1
   4   6  17 147.091 36.6214  -2
  -5   2  13 147.091 36.6214   1
   3   5  16 17.0421 15.5064  -2
  -4   2  13 17.0421 15.5064   1
   2   4  15 314.565 46.2212  -2
  -3   2  13 314.565 46.2212   1
   1   3  14 491.421 120.331  -2
  -2   2  13 491.421 120.331   1
   0   2  13 623.335 128.454  -2
  -1   2  13 623.335 128.454   1
   0   2  13 313.095 14.9978   1
   1   2  13 212.913 14.5796   1
  -3   0  11 155.163 98.8722  -2
   2   2  13 155.163 98.8722   1
  -4  -1  10 676.812 47.5415  -2
   3   2  13 676.812 47.5415   1
  -5  -2   9 158.658 24.7580  -2
   4   2  13 158.658 24.7580   1
  -6  -3   8 2.90087 29.4008  -2
   5   2  13 2.90087 29.4008   1
   6   2  13 180.501 16.9639   1
   7   2  13 378.428 21.1755   1
  -8  -6   5 118.825 39.6569  -2
   8   2  13 118.825 39.6569   1
  -9  -7   4 -50.505 38.5866  -2
   9   2  13 -50.505 38.5866   1
   5   8  18 16.1629 70.6871  -2
  -6   3  13 16.1629 70.6871   1
   4   7  17 39.8395 60.4564  -2
  -5   3  13 39.8395 60.4564   1
   3   6  16 64.9897 30.4943  -2
  -4   3  13 64.9897 30.4943   1
  -3   3  13 -3.0006 4.45483   1
   1   4  14 73.2027 72.1471  -2
  -2   3  13 73.2027 72.1471   1
   0   3  13 46.6735 66.5489  -2
  -1   3  13 46.6735 66.5489   1
   0   3  13 113.375 9.98763   1
   1   3  13 430.014 17.4198   1
  -3   1  11 497.150 43.6221  -2
   2   3  13 497.150 43.6221   1
  -4   0  10 454.174 40.0807  -2
   3   3  13 454.174 40.0807   1
  -5  -1   9 8.51012 26.6396  -2
   4   3  13 8.51012 26.6396   1
  -6  -2   8 65.1727 23.9483  -2
   5   3  13 65.1727 23.9483   1
  -7  -3   7 55.1491 32.0747  -2
   6   3  13 55.1491 32.0747   1
   7   3  13 36.7354 8.56281   1
   8   3  13 91.3365 12.8223   1
   9   3  13 593.998 25.8432   1
 -10  -7   4 42.1354 43.3565  -2
  10   3  13 42.1354 43.3565   1
 -11  -8   3 44.5860 44.2653  -2
  11   3  13 44.5860 44.2653   1
 -12  -9   2 35.4281 50.1848  -2
  12   3  13 35.4281 50.1848   1
  -4   4  13 177.212 30.5327   1
   1   6  15 64.9371 32.8018  -2
  -3   4  13 64.9371 32.8018   1
  -2   4  13 -9.6399 7.57090   1
  -1   4  13 75.5196 16.7623   1
   0   4  13 84.4856 11.6013   1
   1   4  13 3.62401 4.00581   1
   2   4  13 -4.5108 3.91933   1
  -4   1  10 75.3562 31.3720  -2
   3   4  13 75.3562 31.3720   1
  -5   0   9 144.586 32.7906  -2
   4   4  13 144.586 32.7906   1
  -6  -1   8 0.66537 29.0135  -2
   5   4  13 0.66537 29.0135   1
  -7  -2   7 104.386 32.6125  -2
   6   4  13 104.386 32.6125   1
  -8  -3   6 402.909 41.9139  -2
   7   4  13 402.909 41.9139   1
   8   4  13 30.8377 9.18844   1
[truncated: 102,959 more chars]
