# Supplementary material
Source: publisher figshare collection journal article supplement (https://acs.figshare.com/ndownloader/files/22494656)
Supplement: Supplementary file 1 [file 22494656 › CIF/1O.cif]

data_1o
_audit_creation_date               2019-04-05
_audit_creation_method
;
Olex2 1.2
(compiled 2018.05.29 svn.r3508 for OlexSys, GUI svn.r5506)
;
_shelx_SHELXL_version_number       '2016/6'
_audit_contact_author_address      ?
_audit_contact_author_email        ?
_audit_contact_author_name         ''
_audit_contact_author_phone        ?
_publ_contact_author_id_orcid      ?
_publ_section_references
;
Dolomanov, O.V., Bourhis, L.J., Gildea, R.J, Howard, J.A.K. & Puschmann, H.
 (2009), J. Appl. Cryst. 42, 339-341.

Sheldrick, G.M. (2008). Acta Cryst. A64, 112-122.
;
_chemical_name_common              ?
_chemical_name_systematic          ?
_chemical_formula_moiety           'C22 H17 Cu I N3 O, C H2 Cl2'
_chemical_formula_sum              'C23 H19 Cl2 Cu I N3 O'
_chemical_formula_weight           614.75
_chemical_melting_point            ?
loop_
  _atom_type_symbol
  _atom_type_description
  _atom_type_scat_dispersion_real
  _atom_type_scat_dispersion_imag
  _atom_type_scat_source
 'C' 'C' 0.0033 0.0016 'International Tables Vol C Tables 4.2.6.8 and 6.1.1.4'
 'H' 'H' 0.0000 0.0000 'International Tables Vol C Tables 4.2.6.8 and 6.1.1.4'
 'Cl' 'Cl' 0.1484 0.1585 'International Tables Vol C Tables 4.2.6.8 and 6.1.1.4'
 'Cu' 'Cu' 0.3201 1.2651 'International Tables Vol C Tables 4.2.6.8 and 6.1.1.4'
 'I' 'I' -0.4742 1.8119 'International Tables Vol C Tables 4.2.6.8 and 6.1.1.4'
 'N' 'N' 0.0061 0.0033 'International Tables Vol C Tables 4.2.6.8 and 6.1.1.4'
 'O' 'O' 0.0106 0.0060 'International Tables Vol C Tables 4.2.6.8 and 6.1.1.4'

_shelx_space_group_comment
;
The symmetry employed for this shelxl refinement is uniquely defined
by the following loop, which should always be used as a source of
symmetry information in preference to the above space-group names.
They are only intended as comments.
;
_space_group_crystal_system        'monoclinic'
_space_group_IT_number             15
_space_group_name_H-M_alt          'C 1 2/c 1'
_space_group_name_Hall             '-C 2yc'
loop_
  _space_group_symop_operation_xyz
 'x, y, z'
 '-x, y, -z+1/2'
 'x+1/2, y+1/2, z'
 '-x+1/2, y+1/2, -z+1/2'
 '-x, -y, -z'
 'x, -y, z-1/2'
 '-x+1/2, -y+1/2, -z'
 'x+1/2, -y+1/2, z-1/2'

_cell_length_a                     24.6615(9)
_cell_length_b                     12.0846(5)
_cell_length_c                     18.0322(7)
_cell_angle_alpha                  90
_cell_angle_beta                   113.580(2)
_cell_angle_gamma                  90
_cell_volume                       4925.3(3)
_cell_formula_units_Z              8
_cell_measurement_reflns_used      8104
_cell_measurement_temperature      100(2)
_cell_measurement_theta_max        24.48
_cell_measurement_theta_min        2.40
_shelx_estimated_absorpt_T_max     0.517
_shelx_estimated_absorpt_T_min     0.482
_exptl_absorpt_coefficient_mu      2.377
_exptl_absorpt_correction_T_max    0.7452
_exptl_absorpt_correction_T_min    0.5145
_exptl_absorpt_correction_type     multi-scan
_exptl_absorpt_process_details    
 'SADABS-2014/5 (Bruker,2014/5) was used for absorption correction. wR2(int) was 0.0798 before and 0.0559 after correction. The Ratio of minimum to maximum transmission is 0.6904. The \l/2 correction factor is 0.00150.'
_exptl_absorpt_special_details     ?
_exptl_crystal_colour              'clear light pink'
_exptl_crystal_colour_lustre       clear
_exptl_crystal_colour_modifier     light
_exptl_crystal_colour_primary      pink
_exptl_crystal_density_diffrn      1.658
_exptl_crystal_density_meas        ?
_exptl_crystal_density_method      ?
_exptl_crystal_description         block
_exptl_crystal_F_000               2416
_exptl_crystal_size_max            0.36
_exptl_crystal_size_mid            0.35
_exptl_crystal_size_min            0.32
_exptl_transmission_factor_max     ?
_exptl_transmission_factor_min     ?
_diffrn_reflns_av_R_equivalents    0.0721
_diffrn_reflns_av_unetI/netI       0.0405
_diffrn_reflns_Laue_measured_fraction_full  0.999
_diffrn_reflns_Laue_measured_fraction_max  0.999
_diffrn_reflns_limit_h_max         29
_diffrn_reflns_limit_h_min         -29
_diffrn_reflns_limit_k_max         14
_diffrn_reflns_limit_k_min         -14
_diffrn_reflns_limit_l_max         21
_diffrn_reflns_limit_l_min         -21
_diffrn_reflns_number              34629
_diffrn_reflns_point_group_measured_fraction_full  0.999
_diffrn_reflns_point_group_measured_fraction_max  0.999
_diffrn_reflns_theta_full          25.242
_diffrn_reflns_theta_max           25.349
_diffrn_reflns_theta_min           1.802
_diffrn_ambient_temperature        100
_diffrn_detector_area_resol_mean   ?
_diffrn_measured_fraction_theta_full  0.999
_diffrn_measured_fraction_theta_max  0.999
_diffrn_measurement_device_type    'Bruker APEX-II CCD'
_diffrn_measurement_method         '\f and \w scans'
_diffrn_radiation_type             MoK\a
_diffrn_radiation_wavelength       0.71073
_diffrn_source                     ?
_diffrn_standards_number           0
_reflns_Friedel_coverage           0.000
_reflns_Friedel_fraction_full      .
_reflns_Friedel_fraction_max       .
_reflns_number_gt                  3453
_reflns_number_total               4515
_reflns_special_details
;
 Reflections were merged by SHELXL according to the crystal
 class for the calculation of statistics and refinement.
 
 _reflns_Friedel_fraction is defined as the number of unique
 Friedel pairs measured divided by the number that would be
 possible theoretically, ignoring centric projections and
 systematic absences.
;
_reflns_threshold_expression       'I > 2\s(I)'
_computing_cell_refinement         'SAINT v8.34A (Bruker, 2013)'
_computing_data_collection         ?
_computing_data_reduction          'SAINT v8.34A (Bruker, 2013)'
_computing_molecular_graphics      'Olex2 (Dolomanov et al., 2009)'
_computing_publication_material    'Olex2 (Dolomanov et al., 2009)'
_computing_structure_refinement    'XL (Sheldrick, 2008)'
_computing_structure_solution      'ShelXS (Sheldrick, 2008)'
_refine_diff_density_max           3.602
_refine_diff_density_min           -1.424
_refine_diff_density_rms           0.213
_refine_ls_extinction_coef         .
_refine_ls_extinction_method       none
_refine_ls_goodness_of_fit_ref     1.157
_refine_ls_hydrogen_treatment      constr
_refine_ls_matrix_type             full
_refine_ls_number_parameters       269
_refine_ls_number_reflns           4515
_refine_ls_number_restraints       0
_refine_ls_R_factor_all            0.1354
_refine_ls_R_factor_gt             0.1075
_refine_ls_restrained_S_all        1.157
_refine_ls_shift/su_max            0.000
_refine_ls_shift/su_mean           0.000
_refine_ls_structure_factor_coef   Fsqd
_refine_ls_weighting_details      
 'w=1/[\s^2^(Fo^2^)+(0.0495P)^2^+306.3603P] where P=(Fo^2^+2Fc^2^)/3'
_refine_ls_weighting_scheme        calc
_refine_ls_wR_factor_gt            0.2353
_refine_ls_wR_factor_ref           0.2519
_refine_special_details            ?
_olex2_refinement_description
;
1. Fixed Uiso
 At 1.2 times of:
  All C(H) groups, All C(H,H) groups
 At 1.5 times of:
  All C(H,H,H) groups
2. Uiso/Uaniso restraints and constraints
Uanis(C23) = Uanis(C22)
Uanis(Cl2) = Uanis(Cl1)
3.a Secondary CH2 refined with riding coordinates:
 C23(H23A,H23B)
3.b Aromatic/amide H refined with riding coordinates:
 C7(H7), C9(H9), C4(H4), C14(H14), C15(H15), C5(H5), C21(H21), C13(H13),
 C12(H12), C2(H2), C1(H1), C20(H20), C17(H17), C18(H18)
3.c Idealised Me refined as rotating group:
 C22(H22A,H22B,H22C)
;
_atom_sites_solution_hydrogens     geom
_atom_sites_solution_primary       direct
_atom_sites_solution_secondary     ?
loop_
  _atom_site_label
  _atom_site_type_symbol
  _atom_site_fract_x
  _atom_site_fract_y
  _atom_site_fract_z
  _atom_site_U_iso_or_equiv
  _atom_site_adp_type
  _atom_site_occupancy
  _atom_site_site_symmetry_order
  _atom_site_calc_flag
  _atom_site_refinement_flags_posn
  _atom_site_refinement_flags_adp
  _atom_site_refinement_flags_occupancy
  _atom_site_disorder_assembly
  _atom_site_disorder_group
 I1 I 0.54126(4) 0.15631(9) 0.46454(6) 0.0485(3) Uani 1 1 d . . . . .
 Cu1 Cu 0.50052(7) 0.05060(16) 0.56268(10) 0.0410(5) Uani 1 1 d . . . . .
 N2 N 0.2481(4) 0.3862(9) 0.4283(6) 0.033(2) Uani 1 1 d . . . . .
 N1 N 0.4295(5) 0.1453(10) 0.5477(7) 0.039(3) Uani 1 1 d . . . . .
 N3 N 0.0663(5) 0.4470(11) 0.1746(7) 0.045(3) Uani 1 1 d . . . . .
 O1 O 0.2872(8) 0.8872(11) 0.7712(8) 0.085(5) Uani 1 1 d . . . . .
 C10 C 0.2065(5) 0.4643(11) 0.4105(7) 0.030(3) Uani 1 1 d . . . . .
 C6 C 0.2944(5) 0.3924(11) 0.4994(8) 0.034(3) Uani 1 1 d . . . . .
 C11 C 0.1568(5) 0.4566(12) 0.3297(7) 0.034(3) Uani 1 1 d . . . . .
 C8 C 0.2585(6) 0.5595(11) 0.5358(7) 0.034(3) Uani 1 1 d . . . . .
 C7 C 0.3001(6) 0.4770(10) 0.5544(8) 0.031(3) Uani 1 1 d . . . . .
 H7 H 0.332964 0.477673 0.605194 0.037 Uiso 1 1 calc R . . . .
 C9 C 0.2099(6) 0.5524(11) 0.4613(7) 0.034(3) Uani 1 1 d . . . . .
 H9 H 0.179643 0.606991 0.445914 0.041 Uiso 1 1 calc R . . . .
 C4 C 0.3380(6) 0.2268(11) 0.4622(8) 0.038(3) Uani 1 1 d . . . . .
 H4 H 0.305422 0.225489 0.411116 0.045 Uiso 1 1 calc R . . . .
 C16 C 0.2650(6) 0.6499(12) 0.5947(8) 0.040(3) Uani 1 1 d . . . . .
 C14 C 0.1126(6) 0.3800(13) 0.1970(8) 0.043(3) Uani 1 1 d . . . . .
 H14 H 0.114183 0.327588 0.158630 0.051 Uiso 1 1 calc R . . . .
 C15 C 0.1583(6) 0.3813(12) 0.2715(8) 0.040(3) Uani 1 1 d . . . . .
 H15 H 0.190704 0.331829 0.283635 0.048 Uiso 1 1 calc R . . . .
 C5 C 0.3820(6) 0.1497(14) 0.4789(8) 0.046(4) Uani 1 1 d . . . . .
 H5 H 0.378255 0.096129 0.438525 0.056 Uiso 1 1 calc R . . . .
 C21 C 0.2168(7) 0.7132(11) 0.5894(9) 0.044(4) Uani 1 1 d . . . . .
 H21 H 0.179391 0.701361 0.546308 0.053 Uiso 1 1 calc R . . . .
 C13 C 0.0646(6) 0.5188(15) 0.2304(9) 0.051(4) Uani 1 1 d . . . . .
 H13 H 0.032070 0.568334 0.215411 0.061 Uiso 1 1 calc R . . . .
 C3 C 0.3400(5) 0.3054(12) 0.5175(8) 0.039(3) Uani 1 1 d . . . . .
 C12 C 0.1070(6) 0.5246(13) 0.3074(8) 0.043(4) Uani 1 1 d . . . . .
 H12 H 0.102702 0.574498 0.345443 0.051 Uiso 1 1 calc R . . . .
 C2 C 0.3882(7) 0.2969(15) 0.5922(10) 0.066(5) Uani 1 1 d . . . . .
 H2 H 0.391707 0.346254 0.634917 0.079 Uiso 1 1 calc R . . . .
 C1 C 0.4308(7) 0.2161(15) 0.6038(10) 0.062(5) Uani 1 1 d . . . . .
 H1 H 0.462841 0.211620 0.655341 0.075 Uiso 1 1 calc R . . . .
 Cl2 Cl 0.5847(9) 0.510(3) 0.5785(10) 0.434(14) Uani 1 1 d . . . . .
 C20 C 0.2233(8) 0.7955(13) 0.6482(10) 0.056(4) Uani 1 1 d . . . . .
 H20 H 0.190351 0.839468 0.644417 0.067 Uiso 1 1 calc R . . . .
 C17 C 0.3183(8) 0.6736(13) 0.6567(9) 0.060(5) Uani 1 1 d . . . . .
 H17 H 0.352272 0.634239 0.659009 0.072 Uiso 1 1 calc R . . . .
 C19 C 0.2771(10) 0.8115(14) 0.7104(10) 0.065(6) Uani 1 1 d . . . . .
 C18 C 0.3253(10) 0.7506(15) 0.7154(10) 0.072(6) Uani 1 1 d . . . . .
 H18 H 0.362719 0.761511 0.758661 0.087 Uiso 1 1 calc R . . . .
 C22 C 0.2392(15) 0.956(3) 0.7624(18) 0.134(8) Uani 1 1 d . . . . .
 H22A H 0.222624 0.987132 0.707601 0.201 Uiso 1 1 calc GR . . . .
 H22B H 0.252811 1.016604 0.801927 0.201 Uiso 1 1 calc GR . . . .
 H22C H 0.208830 0.913240 0.771644 0.201 Uiso 1 1 calc GR . . . .
 Cl1 Cl 0.5541(9) 0.468(3) 0.7046(10) 0.434(14) Uani 1 1 d . . . . .
 C23 C 0.5364(15) 0.450(3) 0.5964(18) 0.134(8) Uani 1 1 d . . . . .
 H23A H 0.535806 0.370424 0.583214 0.161 Uiso 1 1 calc R . . . .
 H23B H 0.497102 0.482008 0.563606 0.161 Uiso 1 1 calc R . . . .

loop_
  _atom_site_aniso_label
  _atom_site_aniso_U_11
  _atom_site_aniso_U_22
  _atom_site_aniso_U_33
  _atom_site_aniso_U_23
  _atom_site_aniso_U_13
  _atom_site_aniso_U_12
 I1 0.0431(5) 0.0604(6) 0.0472(6) 0.0059(5) 0.0237(4) 0.0061(5)
 Cu1 0.0254(8) 0.0601(12) 0.0350(9) 0.0029(8) 0.0095(7) 0.0108(8)
 N2 0.031(6) 0.041(6) 0.027(5) 0.002(5) 0.011(5) -0.001(5)
 N1 0.030(6) 0.050(7) 0.037(6) -0.006(6) 0.012(5) 0.006(5)
 N3 0.023(5) 0.069(9) 0.045(7) -0.012(6) 0.014(5) -0.010(6)
 O1 0.157(14) 0.055(8) 0.055(8) -0.024(6) 0.055(9) -0.034(9)
 C10 0.028(6) 0.034(7) 0.026(6) -0.007(5) 0.010(5) -0.006(5)
 C6 0.031(7) 0.039(7) 0.034(7) -0.001(6) 0.017(6) 0.000(6)
 C11 0.022(6) 0.050(8) 0.030(7) -0.002(6) 0.010(5) -0.005(6)
 C8 0.043(7) 0.031(7) 0.028(6) -0.009(6) 0.016(6) -0.013(6)
 C7 0.033(7) 0.028(7) 0.029(6) 0.000(5) 0.010(5) -0.003(5)
 C9 0.037(7) 0.036(7) 0.030(7) 0.005(6) 0.013(6) -0.005(6)
 C4 0.028(7) 0.044(8) 0.035(7) -0.008(6) 0.006(6) 0.014(6)
 C16 0.060(9) 0.033(7) 0.035(7) -0.001(6) 0.028(7) -0.009(7)
 C14 0.041(8) 0.053(9) 0.031(7) -0.011(7) 0.012(6) -0.003(7)
 C15 0.037(7) 0.049(8) 0.032(7) -0.008(6) 0.011(6) 0.007(6)
 C5 0.041(8) 0.061(10) 0.037(8) -0.009(7) 0.015(6) 0.007(7)
 C21 0.071(10) 0.034(8) 0.038(8) -0.008(6) 0.032(7) -0.013(7)
 C13 0.022(7) 0.081(12) 0.051(9) -0.017(9) 0.016(6) 0.000(7)
 C3 0.022(6) 0.052(9) 0.041(8) -0.001(7) 0.010(6) 0.003(6)
 C12 0.028(7) 0.066(10) 0.034(7) -0.010(7) 0.012(6) 0.010(7)
 C2 0.057(10) 0.069(12) 0.052(10) -0.021(9) 0.000(8) 0.023(9)
 C1 0.036(8) 0.073(12) 0.054(10) -0.005(9) -0.007(7) 0.016(8)
 Cl2 0.296(16) 0.79(4) 0.171(10) 0.052(16) 0.045(10) -0.19(2)
 C20 0.083(12) 0.041(9) 0.065(11) -0.006(8) 0.053(10) -0.020(8)
 C17 0.079(12) 0.041(9) 0.043(9) -0.016(7) 0.006(8) 0.000(8)
 C19 0.128(17) 0.041(10) 0.042(9) -0.019(7) 0.051(11) -0.040(11)
 C18 0.109(16) 0.048(10) 0.040(9) -0.014(8) 0.010(10) -0.005(11)
 C22 0.17(2) 0.122(18) 0.120(17) -0.037(14) 0.070(16) -0.050(16)
 Cl1 0.296(16) 0.79(4) 0.171(10) 0.052(16) 0.045(10) -0.19(2)
 C23 0.17(2) 0.122(18) 0.120(17) -0.037(14) 0.070(16) -0.050(16)

_geom_special_details
;
 All esds (except the esd in the dihedral angle between two l.s. planes)
 are estimated using the full covariance matrix.  The cell esds are taken
 into account individually in the estimation of esds in distances, angles
 and torsion angles; correlations between esds in cell parameters are only
 used when they are defined by crystal symmetry.  An approximate (isotropic)
 treatment of cell esds is used for estimating esds involving l.s. planes.
;
loop_
  _geom_bond_atom_site_label_1
  _geom_bond_atom_site_label_2
  _geom_bond_distance
  _geom_bond_site_symmetry_2
  _geom_bond_publ_flag
 I1 Cu1 2.674(2) 5_656 ?
 I1 Cu1 2.682(2) . ?
 Cu1 Cu1 2.561(3) 5_656 ?
 Cu1 N1 2.019(11) . ?
 Cu1 N3 2.022(12) 8_556 ?
 N2 C10 1.333(16) . ?
 N2 C6 1.334(16) . ?
 N1 C5 1.323(17) . ?
 N1 C1 1.32(2) . ?
 N3 C14 1.324(18) . ?
 N3 C13 1.341(19) . ?
 O1 C19 1.371(19) . ?
 O1 C22 1.40(3) . ?
 C10 C11 1.485(16) . ?
 C10 C9 1.386(18) . ?
 C6 C7 1.392(18) . ?
 C6 C3 1.477(18) . ?
 C11 C15 1.402(18) . ?
 C11 C12 1.397(18) . ?
 C8 C7 1.371(18) . ?
 C8 C9 1.401(18) . ?
 C8 C16 1.487(18) . ?
 C7 H7 0.9500 . ?
 C9 H9 0.9500 . ?
 C4 H4 0.9500 . ?
 C4 C5 1.370(19) . ?
 C4 C3 1.364(19) . ?
 C16 C21 1.39(2) . ?
 C16 C17 1.37(2) . ?
 C14 H14 0.9500 . ?
 C14 C15 1.364(18) . ?
 C15 H15 0.9500 . ?
 C5 H5 0.9500 . ?
 C21 H21 0.9500 . ?
 C21 C20 1.42(2) . ?
 C13 H13 0.9500 . ?
 C13 C12 1.367(19) . ?
 C3 C2 1.40(2) . ?
 C12 H12 0.9500 . ?
 C2 H2 0.9500 . ?
 C2 C1 1.39(2) . ?
 C1 H1 0.9500 . ?
 Cl2 C23 1.53(3) . ?
 C20 H20 0.9500 . ?
 C20 C19 1.37(3) . ?
 C17 H17 0.9500 . ?
 C17 C18 1.37(2) . ?
 C19 C18 1.37(3) . ?
 C18 H18 0.9500 . ?
 C22 H22A 0.9800 . ?
 C22 H22B 0.9800 . ?
 C22 H22C 0.9800 . ?
 Cl1 C23 1.83(3) . ?
 C23 H23A 0.9900 . ?
 C23 H23B 0.9900 . ?

loop_
  _geom_angle_atom_site_label_1
  _geom_angle_atom_site_label_2
  _geom_angle_atom_site_label_3
  _geom_angle
  _geom_angle_site_symmetry_1
  _geom_angle_site_symmetry_3
  _geom_angle_publ_flag
 Cu1 I1 Cu1 57.13(7) 5_656 . ?
 I1 Cu1 I1 122.87(7) 5_656 . ?
 Cu1 Cu1 I1 61.60(8) 5_656 5_656 ?
 Cu1 Cu1 I1 61.27(7) 5_656 . ?
 N1 Cu1 I1 100.1(3) . . ?
 N1 Cu1 I1 104.8(3) . 5_656 ?
 N1 Cu1 Cu1 116.8(3) . 5_656 ?
 N1 Cu1 N3 115.6(5) . 8_556 ?
 N3 Cu1 I1 106.8(3) 8_556 . ?
 N3 Cu1 I1 107.1(4) 8_556 5_656 ?
 N3 Cu1 Cu1 127.5(3) 8_556 5_656 ?
 C10 N2 C6 118.2(11) . . ?
 C5 N1 Cu1 122.9(9) . . ?
 C1 N1 Cu1 120.8(9) . . ?
 C1 N1 C5 115.9(12) . . ?
 C14 N3 Cu1 124.3(10) . 8_455 ?
 C14 N3 C13 116.7(12) . . ?
 C13 N3 Cu1 119.0(10) . 8_455 ?
 C19 O1 C22 116(2) . . ?
 N2 C10 C11 116.5(11) . . ?
 N2 C10 C9 123.2(11) . . ?
 C9 C10 C11 120.3(12) . . ?
 N2 C6 C7 121.9(12) . . ?
 N2 C6 C3 117.1(12) . . ?
 C7 C6 C3 120.9(12) . . ?
 C15 C11 C10 121.1(12) . . ?
 C12 C11 C10 122.1(12) . . ?
 C12 C11 C15 116.8(12) . . ?
 C7 C8 C9 117.4(12) . . ?
 C7 C8 C16 120.2(12) . . ?
 C9 C8 C16 122.4(13) . . ?
 C6 C7 H7 119.8 . . ?
 C8 C7 C6 120.4(12) . . ?
 C8 C7 H7 119.8 . . ?
 C10 C9 C8 118.8(12) . . ?
 C10 C9 H9 120.6 . . ?
 C8 C9 H9 120.6 . . ?
 C5 C4 H4 119.3 . . ?
 C3 C4 H4 119.3 . . ?
 C3 C4 C5 121.4(12) . . ?
 C21 C16 C8 120.8(13) . . ?
 C17 C16 C8 122.1(14) . . ?
 C17 C16 C21 117.1(14) . . ?
 N3 C14 H14 117.8 . . ?
 N3 C14 C15 124.4(13) . . ?
 C15 C14 H14 117.8 . . ?
 C11 C15 H15 120.5 . . ?
 C14 C15 C11 119.1(13) . . ?
 C14 C15 H15 120.5 . . ?
 N1 C5 C4 124.0(13) . . ?
 N1 C5 H5 118.0 . . ?
 C4 C5 H5 118.0 . . ?
 C16 C21 H21 120.0 . . ?
 C16 C21 C20 120.0(15) . . ?
 C20 C21 H21 120.0 . . ?
 N3 C13 H13 118.1 . . ?
 N3 C13 C12 123.7(14) . . ?
 C12 C13 H13 118.1 . . ?
 C4 C3 C6 122.2(12) . . ?
 C4 C3 C2 114.9(13) . . ?
 C2 C3 C6 123.0(13) . . ?
 C11 C12 H12 120.4 . . ?
 C13 C12 C11 119.3(13) . . ?
 C13 C12 H12 120.4 . . ?
 C3 C2 H2 120.1 . . ?
 C1 C2 C3 119.8(15) . . ?
 C1 C2 H2 120.1 . . ?
 N1 C1 C2 123.8(14) . . ?
 N1 C1 H1 118.1 . . ?
 C2 C1 H1 118.1 . . ?
 C21 C20 H20 120.1 . . ?
 C19 C20 C21 119.7(17) . . ?
 C19 C20 H20 120.1 . . ?
 C16 C17 H17 118.1 . . ?
 C18 C17 C16 123.8(18) . . ?
 C18 C17 H17 118.1 . . ?
 C20 C19 O1 124(2) . . ?
 C20 C19 C18 120.6(15) . . ?
 C18 C19 O1 115.5(19) . . ?
 C17 C18 C19 118.5(18) . . ?
 C17 C18 H18 120.7 . . ?
 C19 C18 H18 120.7 . . ?
 O1 C22 H22A 109.5 . . ?
 O1 C22 H22B 109.5 . . ?
 O1 C22 H22C 109.5 . . ?
 H22A C22 H22B 109.5 . . ?
 H22A C22 H22C 109.5 . . ?
 H22B C22 H22C 109.5 . . ?
 Cl2 C23 Cl1 107.0(19) . . ?
 Cl2 C23 H23A 110.3 . . ?
 Cl2 C23 H23B 110.3 . . ?
 Cl1 C23 H23A 110.3 . . ?
 Cl1 C23 H23B 110.3 . . ?
 H23A C23 H23B 108.6 . . ?

_shelx_res_file
;
TITL 1o.res in C2/c
    1o.res
    created by SHELXL-2016/6 at 20:55:30 on 05-Apr-2019
CELL 0.71073 24.6615 12.0846 18.0322 90 113.58 90
ZERR 8 0.0009 0.0005 0.0007 0 0.002 0
LATT 7
SYMM -X,+Y,0.5-Z
SFAC C H Cl Cu I N O
UNIT 184 152 16 8 8 24 8
EADP C23 C22
EADP Cl2 Cl1

L.S. 6
PLAN  20
SIZE 0.36 0.35 0.32
TEMP -173.15
BOND $H
fmap 2
acta
OMIT 4 0 0
OMIT -3 1 2
OMIT 2 0 4
REM <olex2.extras>
REM <HklSrc "%.\\1o.hkl">
REM </olex2.extras>

WGHT    0.049500  306.360291
FVAR       0.18702
I1    5    0.541257    0.156314    0.464543    11.00000    0.04306    0.06044 =
         0.04725    0.00588    0.02366    0.00609
CU1   4    0.500517    0.050599    0.562681    11.00000    0.02542    0.06010 =
         0.03501    0.00286    0.00950    0.01078
N2    6    0.248061    0.386238    0.428349    11.00000    0.03095    0.04089 =
         0.02721    0.00189    0.01122   -0.00058
N1    6    0.429463    0.145297    0.547695    11.00000    0.02954    0.05025 =
         0.03658   -0.00619    0.01194    0.00648
N3    6    0.066314    0.446964    0.174622    11.00000    0.02271    0.06862 =
         0.04461   -0.01243    0.01409   -0.00977
O1    7    0.287228    0.887187    0.771183    11.00000    0.15683    0.05513 =
         0.05533   -0.02450    0.05504   -0.03398
C10   1    0.206541    0.464289    0.410484    11.00000    0.02782    0.03401 =
         0.02604   -0.00687    0.00966   -0.00633
C6    1    0.294353    0.392395    0.499386    11.00000    0.03074    0.03931 =
         0.03414   -0.00075    0.01680    0.00002
C11   1    0.156798    0.456560    0.329719    11.00000    0.02159    0.05049 =
         0.02957   -0.00165    0.00959   -0.00546
C8    1    0.258522    0.559457    0.535802    11.00000    0.04307    0.03128 =
         0.02778   -0.00853    0.01586   -0.01330
C7    1    0.300061    0.477040    0.554414    11.00000    0.03338    0.02812 =
         0.02922    0.00040    0.01031   -0.00320
AFIX  43
H7    2    0.332964    0.477673    0.605194    11.00000   -1.20000
AFIX   0
C9    1    0.209854    0.552361    0.461312    11.00000    0.03676    0.03604 =
         0.02956    0.00496    0.01266   -0.00502
AFIX  43
H9    2    0.179643    0.606991    0.445914    11.00000   -1.20000
AFIX   0
C4    1    0.337994    0.226791    0.462222    11.00000    0.02844    0.04390 =
         0.03496   -0.00770    0.00597    0.01417
AFIX  43
H4    2    0.305422    0.225489    0.411116    11.00000   -1.20000
AFIX   0
C16   1    0.265049    0.649876    0.594680    11.00000    0.05952    0.03308 =
         0.03493   -0.00116    0.02800   -0.00946
C14   1    0.112649    0.380014    0.197001    11.00000    0.04116    0.05349 =
         0.03113   -0.01126    0.01157   -0.00271
AFIX  43
H14   2    0.114183    0.327588    0.158630    11.00000   -1.20000
AFIX   0
C15   1    0.158328    0.381273    0.271458    11.00000    0.03681    0.04929 =
         0.03217   -0.00849    0.01070    0.00725
AFIX  43
H15   2    0.190704    0.331829    0.283635    11.00000   -1.20000
AFIX   0
C5    1    0.382016    0.149692    0.478856    11.00000    0.04105    0.06083 =
         0.03689   -0.00851    0.01519    0.00651
AFIX  43
H5    2    0.378255    0.096129    0.438525    11.00000   -1.20000
AFIX   0
C21   1    0.216824    0.713187    0.589399    11.00000    0.07149    0.03351 =
         0.03785   -0.00820    0.03242   -0.01276
AFIX  43
H21   2    0.179391    0.701361    0.546308    11.00000   -1.20000
AFIX   0
C13   1    0.064608    0.518754    0.230354    11.00000    0.02231    0.08138 =
         0.05079   -0.01735    0.01593    0.00009
AFIX  43
H13   2    0.032070    0.568334    0.215411    11.00000   -1.20000
AFIX   0
C3    1    0.339959    0.305395    0.517521    11.00000    0.02246    0.05201 =
         0.04101   -0.00144    0.01048    0.00281
C12   1    0.107027    0.524641    0.307439    11.00000    0.02781    0.06641 =
         0.03388   -0.00995    0.01235    0.00967
AFIX  43
H12   2    0.102702    0.574498    0.345443    11.00000   -1.20000
AFIX   0
C2    1    0.388165    0.296867    0.592232    11.00000    0.05673    0.06915 =
         0.05223   -0.02148    0.00012    0.02295
AFIX  43
H2    2    0.391707    0.346254    0.634917    11.00000   -1.20000
AFIX   0
C1    1    0.430809    0.216067    0.603837    11.00000    0.03637    0.07332 =
         0.05401   -0.00545   -0.00662    0.01551
AFIX  43
H1    2    0.462841    0.211620    0.655341    11.00000   -1.20000
AFIX   0
CL2   3    0.584724    0.510059    0.578534    11.00000    0.29622    0.78714 =
         0.17147    0.05195    0.04464   -0.19179
C20   1    0.223299    0.795525    0.648204    11.00000    0.08339    0.04140 =
         0.06479   -0.00621    0.05312   -0.01956
AFIX  43
H20   2    0.190351    0.839468    0.644417    11.00000   -1.20000
AFIX   0
C17   1    0.318288    0.673595    0.656707    11.00000    0.07890    0.04105 =
         0.04284   -0.01574    0.00555   -0.00017
AFIX  43
H17   2    0.352272    0.634239    0.659009    11.00000   -1.20000
AFIX   0
C19   1    0.277133    0.811527    0.710426    11.00000    0.12759    0.04075 =
         0.04239   -0.01878    0.05085   -0.03972
C18   1    0.325281    0.750554    0.715385    11.00000    0.10917    0.04847 =
         0.04030   -0.01388    0.00974   -0.00500
AFIX  43
H18   2    0.362719    0.761511    0.758661    11.00000   -1.20000
AFIX   0
C22   1    0.239249    0.956259    0.762428    11.00000    0.17247    0.12177 =
         0.11985   -0.03703    0.07043   -0.04971
AFIX 137
H22A  2    0.222624    0.987132    0.707601    11.00000   -1.50000
H22B  2    0.252811    1.016604    0.801927    11.00000   -1.50000
H22C  2    0.208830    0.913240    0.771644    11.00000   -1.50000
AFIX   0
CL1   3    0.554104    0.468442    0.704618    11.00000    0.29622    0.78714 =
         0.17147    0.05195    0.04464   -0.19179
C23   1    0.536418    0.450062    0.596398    11.00000    0.17247    0.12177 =
         0.11985   -0.03703    0.07043   -0.04971
AFIX  23
H23A  2    0.535806    0.370424    0.583214    11.00000   -1.20000
H23B  2    0.497102    0.482008    0.563606    11.00000   -1.20000
AFIX   0
HKLF 4


REM  1o.res in C2/c
REM R1 =  0.1075 for    3453 Fo > 4sig(Fo)  and  0.1354 for all    4515 data
REM    269 parameters refined using      0 restraints

END

WGHT      0.0495    306.4492

REM Highest difference peak  3.602,  deepest hole -1.424,  1-sigma level  0.213
Q1    1   0.5200  0.1050  0.4260  11.00000  0.05    3.60
Q2    1   0.5575  0.1110  0.5033  11.00000  0.05    2.35
Q3    1   0.4945  0.6629  0.7253  11.00000  0.05    2.19
Q4    1   0.5781  0.3919  0.7068  11.00000  0.05    1.51
Q5    1   0.5417  0.2272  0.4851  11.00000  0.05    1.46
Q6    1   0.5108  0.1237  0.5883  11.00000  0.05    1.42
Q7    1   0.5514  0.5565  0.6913  11.00000  0.05    1.16
Q8    1   0.5650  0.4432  0.5704  11.00000  0.05    1.09
Q9    1   0.4856 -0.0180  0.5260  11.00000  0.05    1.00
Q10   1   0.5225  0.6627  0.6057  11.00000  0.05    0.98
Q11   1   0.4172  0.0415  0.5122  11.00000  0.05    0.97
Q12   1   0.5678  0.5666  0.4987  11.00000  0.05    0.88
Q13   1   0.4154  0.7410  0.6359  11.00000  0.05    0.87
Q14   1   0.5834  0.3652  0.4879  11.00000  0.05    0.82
Q15   1   0.5425  0.2216  0.4424  11.00000  0.05    0.80
Q16   1   0.3798  0.1471  0.6075  11.00000  0.05    0.79
Q17   1   0.5615  0.1833  0.4522  11.00000  0.05    0.74
Q18   1  -0.0335  0.5580  0.1780  11.00000  0.05    0.71
Q19   1   0.4034  0.3445  0.5574  11.00000  0.05    0.68
Q20   1   0.5509  0.1457  0.3894  11.00000  0.05    0.66
;
_shelx_res_checksum                72481
_shelx_hkl_file
;
  -2   0   0 2979.80   45.50
   2   0   0 3048.90   42.60
   4   0   0 9695.43  129.89
   4   0   0 9571.34  131.49
   4   0   0 9905.41  132.09
  -4   0   0 9642.63  134.49
  -4   0   0 9375.96  137.59
   6   0   0   29.10    6.80
   6   0   0   32.10    5.50
  -6   0   0   36.30    7.30
  -6   0   0   50.89   10.20
   6   0   0   41.10    9.00
   6   0   0   32.50    5.90
   8   0   0  257.97   13.80
   8   0   0  263.07   15.80
   8   0   0  279.67   16.40
  -8   0   0  287.97   16.70
  -8   0   0  310.67   20.90
   8   0   0  273.57   12.20
  10   0   0  181.78   16.40
 -10   0   0  199.88   17.20
 -10   0   0  202.98   22.40
  10   0   0  200.08   12.40
  10   0   0  180.78   14.50
  10   0   0  197.48   17.70
  12   0   0  111.19   14.10
  12   0   0  121.19   13.70
  12   0   0  118.09   15.60
 -12   0   0  122.49   20.60
  12   0   0  129.19   13.10
 -12   0   0  127.39   15.00
 -14   0   0   -0.80   10.60
  14   0   0  -13.90   10.40
  14   0   0    2.50   13.00
 -14   0   0   -9.40   15.40
  14   0   0   -3.00   10.60
  14   0   0    1.80    8.30
 -16   0   0   44.10   14.90
  16   0   0   52.69   16.60
  16   0   0   56.19   15.50
  16   0   0   54.39   14.20
  16   0   0   49.10   11.70
 -16   0   0   43.80   21.20
  18   0   0  718.93   37.60
  18   0   0  696.53   34.20
  18   0   0  838.12   42.00
 -18   0   0  762.82   40.80
  18   0   0  832.72   36.80
 -18   0   0  790.52   51.99
  20   0   0  928.91   47.20
  20   0   0  908.71   41.90
 -20   0   0  817.62   57.89
 -20   0   0  841.12   46.40
  22   0   0   61.49   24.90
 -22   0   0   85.99   38.60
  22   0   0   98.09   24.10
 -22   0   0   52.29   25.50
  24   0   0  874.91   47.80
 -24   0   0  859.31   69.19
 -24   0   0  874.91   53.99
  24   0   0  849.72   53.59
  26   0   0  589.34   51.79
 -26   0   0  452.55   64.09
 -26   0   0  498.35   50.19
  26   0   0  579.74   45.10
  -1  -1   0 6758.22   93.99
  -1   1   0 6633.74   90.19
  -1   1   0 6753.12   90.59
  -1   1   0 6607.94   91.59
  -1   1   0 6728.43   92.59
   1   1   0 6767.92   92.59
  -1   1   0 6560.54   89.59
   1   1   0 6589.34   91.39
  -3  -1   0 1634.94   33.10
   3  -1   0 1688.93   27.90
   3  -1   0 1689.83   26.10
   3  -1   0 1606.74   26.60
   3   1   0 1633.44   26.40
   3   1   0 1686.83   30.00
   3   1   0 1688.53   28.00
  -3   1   0 1686.43   31.40
  -3   1   0 1722.43   28.10
  -3   1   0 1684.13   31.00
   5  -1   0  924.21   19.90
  -5  -1   0  924.11   20.60
   5  -1   0  949.80   21.00
   5  -1   0  927.01   18.50
  -5  -1   0  975.40   29.30
   5   1   0  905.41   19.80
  -5   1   0  977.30   25.20
   5   1   0  926.51   20.30
  -5   1   0  945.01   21.30
   5   1   0  972.00   20.40
   5   1   0  943.21   23.70
  -5   1   0  917.91   25.50
   7  -1   0  865.61   22.40
  -7  -1   0  849.22   22.70
   7  -1   0  868.91   26.60
   7  -1   0  890.21   22.40
  -7  -1   0  872.51   30.70
   7  -1   0  843.92   19.70
   7   1   0  884.31   21.20
  -7   1   0  850.51   28.30
   7   1   0  860.71   22.50
  -7   1   0  844.22   22.60
  -7   1   0  863.41   26.80
   7   1   0  839.32   21.20
   7   1   0  872.81   25.10
  -9  -1   0  153.98   13.60
   9  -1   0  146.99   15.70
   9  -1   0  159.08   15.00
  -9  -1   0  171.58   21.60
   9  -1   0  134.69   13.20
   9   1   0  150.48   15.70
  -9   1   0  136.69   18.00
  -9   1   0  141.59   16.60
   9   1   0  169.48   11.90
   9   1   0  157.88   12.70
   9   1   0  150.78   13.60
  11  -1   0   56.39   10.60
 -11  -1   0   62.49   17.00
 -11  -1   0   43.00    9.70
  11  -1   0   61.69   12.50
  11  -1   0   55.89    8.40
  11  -1   0   39.30   10.80
  11   1   0   61.39   12.60
 -11   1   0   63.09   12.40
  11   1   0   49.99    8.80
  11   1   0   49.70    9.90
  11   1   0   63.39    9.80
 -11   1   0   75.49   15.70
  13  -1   0   48.50   12.80
  13  -1   0   59.19    9.60
  13  -1   0   84.09   15.40
  13  -1   0   70.49   12.30
 -13  -1   0   80.89   13.00
 -13  -1   0   75.39   20.30
 -13   1   0   86.39   18.40
  13   1   0   75.49   10.90
  13   1   0   70.99   12.00
  13   1   0   83.79   13.40
 -13   1   0   51.09   13.00
  13   1   0   98.39   14.80
 -15  -1   0  179.78   27.60
  15  -1   0  173.28   16.00
  15  -1   0  145.19   19.20
 -15  -1   0  174.28   19.50
  15  -1   0  155.18   17.00
  15  -1   0  173.28   19.60
  15   1   0  193.58   22.20
 -15   1   0  158.28   19.50
 -15   1   0  142.49   25.40
  15   1   0  160.58   17.30
  15   1   0  138.39   18.10
  15   1   0  140.89   14.80
 -17  -1   0  271.57   28.40
 -17  -1   0  327.67   40.50
  17  -1   0  309.67   26.70
  17  -1   0  277.67   28.20
  17  -1   0  314.37   31.40
  17   1   0  285.57   22.20
 -17   1   0  307.67   31.10
 -17   1   0  294.97   37.50
  17   1   0  328.27   27.60
  17   1   0  303.97   26.60
  17   1   0  266.77   28.60
  19  -1   0  707.33   37.80
  19  -1   0  669.03   42.70
 -19  -1   0  690.43   53.89
 -19  -1   0  646.14   39.70
  19   1   0  675.83   36.20
  19   1   0  699.23   39.80
 -19   1   0  733.43   52.29
 -19   1   0  665.33   43.10
  19   1   0  709.43   38.50
  21  -1   0  121.19   26.00
  21  -1   0   69.89   21.30
 -21  -1   0   83.09   35.40
 -21  -1   0  104.99   22.90
 -21   1   0   79.89   24.90
  21   1   0   92.99   20.90
 -21   1   0   74.99   32.20
  21   1   0   99.49   22.50
 -23  -1   0  219.28   29.40
  23  -1   0  213.18   33.10
 -23  -1   0  186.48   46.20
  23  -1   0  266.77   31.10
 -23   1   0  237.18   34.30
  23   1   0  198.18   29.10
 -23   1   0  210.78   43.20
  23   1   0  252.77   28.60
  25  -1   0  250.87   36.80
  25  -1   0  270.87   32.20
 -25  -1   0  203.28   51.09
 -25   1   0  223.18   49.00
 -25   1   0  237.38   35.40
  25   1   0  181.88   28.60
 -27  -1   0  132.09   50.89
  27  -1   0  195.38   35.30
  27   1   0  269.27   33.80
 -27   1   0  188.68   52.89
 -27   1   0  252.47   38.70
   0  -2   0 1858.61   34.90
   0   2   0 1822.22   32.80
   0   2   0 1864.31   33.20
   0   2   0 1860.51   35.00
   2  -2   0 1096.79   22.20
   2  -2   0 1059.19   21.50
  -2  -2   0 1071.29   27.10
  -2   2   0 1042.20   23.00
  -2   2   0 1066.99   21.20
  -2   2   0 1046.30   21.20
  -2   2   0 1035.10   19.90
   2   2   0 1043.80   22.80
   2   2   0 1052.79   24.30
  -2   2   0 1051.49   24.40
   4  -2   0 1331.17   25.80
  -4  -2   0 1316.57   36.20
   4  -2   0 1321.67   24.90
   4  -2   0 1296.77   26.10
  -4   2   0 1294.97   24.80
  -4   2   0 1342.27   24.50
  -4   2   0 1287.17   30.30
   4   2   0 1308.27   30.20
  -4   2   0 1381.36   31.30
   4   2   0 1291.37   27.30
  -4   2   0 1298.57   26.20
   4   2   0 1275.07   24.00
   6  -2   0   37.20    6.60
   6  -2   0   32.70    6.70
   6  -2   0   40.00    6.30
  -6  -2   0   48.70   13.80
   6   2   0   49.70    6.70
  -6   2   0   37.00    7.00
   6   2   0   27.60    8.40
   6   2   0   39.00    7.10
  -6   2   0   31.40    8.60
  -6   2   0   37.50    9.30
   8  -2   0  739.03   27.40
   8  -2   0  789.02   22.30
   8  -2   0  761.32   23.10
  -8  -2   0  782.02   33.70
   8  -2   0  784.12   20.10
  -8   2   0  795.62   28.90
   8   2   0  783.62   22.50
   8   2   0  751.42   21.20
  -8   2   0  749.33   23.30
  -8   2   0  753.62   28.50
   8   2   0  760.32   25.80
  10  -2   0 1698.13   39.00
 -10  -2   0 1701.33   37.50
  10  -2   0 1698.03   45.10
  10  -2   0 1718.63   38.60
 -10  -2   0 1743.03   52.59
 -10   2   0 1644.04   47.00
  10   2   0 1663.63   37.00
  10   2   0 1657.93   37.00
 -10   2   0 1669.93   39.20
  10   2   0 1647.94   36.20
 -10   2   0 1650.63   45.70
  10   2   0 1687.03   42.10
 -12  -2   0 1096.09   47.40
  12  -2   0 1060.69   32.80
  12  -2   0 1012.40   34.30
 -12  -2   0 1083.59   32.00
  12  -2   0 1069.99   38.40
  12   2   0 1078.79   30.60
  12   2   0 1074.49   31.40
  12   2   0 1090.79   30.50
 -12   2   0 1085.09   39.50
  12   2   0 1100.69   35.80
 -12   2   0 1043.70   40.60
 -12   2   0 1065.49   33.80
  14  -2   0 1298.57   41.70
 -14  -2   0 1442.26   40.60
  14  -2   0 1276.07   39.50
  14   2   0 1426.56   38.20
  14   2   0 1435.66   43.50
  14   2   0 1435.46   39.90
  14   2   0 1407.06   37.40
 -16  -2   0  681.63   32.60
  16  -2   0  645.34   34.10
  16  -2   0  712.83   38.80
  16  -2   0  708.73   33.30
 -16  -2   0  674.53   48.00
  16   2   0  691.53   34.30
 -16   2   0  680.73   38.00
  16   2   0  727.93   31.10
 -16   2   0  693.93   41.70
  16   2   0  705.73   29.20
  18  -2   0   72.99   21.30
 -18  -2   0   66.69   32.10
 -18  -2   0  117.49   19.20
  18  -2   0   40.10   19.10
  18   2   0  125.79   18.80
 -18   2   0   71.19   20.40
  18   2   0   88.79   17.80
 -18   2   0  113.79   28.00
  18   2   0  104.69   17.10
  18   2   0   73.09   20.60
 -20  -2   0  265.67   30.60
 -20  -2   0  225.98   41.20
  20  -2   0  171.48   27.70
  20  -2   0  213.08   26.00
 -20   2   0  240.78   38.60
 -20   2   0  199.98   28.90
  20   2   0  210.58   25.80
  20   2   0  254.37   30.30
  22  -2   0  -25.70   20.30
  22  -2   0    7.00   23.50
 -22  -2   0   48.50   30.40
 -22   2   0   32.20   24.50
 -22   2   0   22.30   32.20
  22   2   0   16.20   19.70
  24  -2   0   15.40   25.40
  24  -2   0   54.79   22.70
 -24  -2   0  -39.80   36.30
 -24   2   0   16.80   36.40
 -24   2   0   33.60   27.00
  24   2   0   14.50   21.50
 -26  -2   0  -58.59   40.60
  26  -2   0   11.30   28.90
  26  -2   0   33.10   25.30
 -26   2   0   28.90   29.20
 -26   2   0  -21.70   37.50
  26   2   0   14.40   23.10
  -1  -3   0 2672.53   52.39
   1  -3   0 2745.73   50.99
   1   3   0 2682.63   49.50
   1   3   0 2703.83   48.90
  -1   3   0 2690.73   42.90
  -1   3   0 2711.73   50.89
  -1   3   0 2695.63   45.50
  -1   3   0 2716.03   47.90
  -1   3   0 2664.33   47.50
   3  -3   0  903.71   22.70
   3  -3   0  869.51   20.70
  -3  -3   0  841.92   30.90
   3  -3   0  921.71   23.60
  -3   3   0  864.91   20.40
   3   3   0  890.51   26.20
   3   3   0  859.41   23.90
  -3   3   0  906.11   26.40
  -3   3   0  906.81   22.00
  -3   3   0  881.51   21.90
  -3   3   0  894.51   24.70
   5  -3   0  165.18   11.80
   5  -3   0  154.08   11.40
  -5  -3   0  158.68   22.00
   5  -3   0  160.48   11.80
   5   3   0  158.88   14.60
  -5   3   0  156.48   14.90
  -5   3   0  158.28   10.60
  -5   3   0  135.29   15.00
   5   3   0  158.78   10.40
  -5   3   0  157.78   11.80
  -5   3   0  165.18   10.30
   5   3   0  166.78   13.10
   7  -3   0 1862.21   35.30
   7  -3   0 1731.63   43.30
   7  -3   0 1763.62   37.50
   7  -3   0 1791.62   36.50
  -7  -3   0 1783.92   50.89
   7   3   0 1747.33   42.30
  -7   3   0 1772.52   44.30
  -7   3   0 1790.42   37.80
  -7   3   0 1725.43   34.50
   7   3   0 1676.03   33.40
   7   3   0 1725.73   38.40
  -7   3   0 1781.02   44.30
  -7   3   0 1764.62   33.60
   9  -3   0 2324.27   43.60
  -9  -3   0 2391.56   63.89
   9  -3   0 2299.67   54.49
   9  -3   0 2374.06   46.70
   9  -3   0 2355.56   48.00
   9   3   0 2315.77   48.00
  -9   3   0 2357.26   48.30
  -9   3   0 2391.36   56.59
   9   3   0 2264.87   43.90
  -9   3   0 2261.27   55.79
   9   3   0 2302.87   52.39
  11  -3   0 3371.26   62.79
  11  -3   0 3246.98   71.59
  11  -3   0 3206.18   63.29
 -11  -3   0 3271.67   81.69
  11  -3   0 3407.96   58.89
 -11   3   0 3298.87   72.79
 -11   3   0 3158.98   73.59
  11   3   0 3341.37   63.19
  11   3   0 3315.97   68.99
 -11   3   0 3257.37   63.69
  11   3   0 3221.78   59.49
  13  -3   0 2379.86   54.99
  13  -3   0 2444.76   63.69
  13  -3   0 2445.06   55.29
 -13  -3   0 2416.16   73.19
 -13   3   0 2398.86   63.79
 -13   3   0 2403.76   65.79
  13   3   0 2449.25   59.49
  13   3   0 2486.45   53.89
 -13   3   0 2463.45   55.79
  13   3   0 2435.16   50.19
  13   3   0 2484.15   51.39
  15  -3   0  918.31   39.50
  15  -3   0 1014.30   37.90
  15  -3   0 1092.99   44.90
 -15  -3   0 1067.09   56.59
 -15  -3   0 1150.78   35.60
  15   3   0 1055.89   34.60
  15   3   0 1082.09   34.50
  15   3   0 1024.20   40.50
 -15   3   0 1055.29   47.30
 -15   3   0 1054.59   44.40
  15   3   0 1101.59   36.20
 -17  -3   0  283.97   39.80
  17  -3   0  213.88   23.30
 -17  -3   0  351.36   26.20
  17  -3   0  325.57   33.60
 -17   3   0  304.07   35.90
  17   3   0  337.47   25.70
  17   3   0  353.26   26.50
  17   3   0  299.87   25.20
  17   3   0  243.88   28.90
 -17   3   0  319.07   34.00
 -19  -3   0   15.00   32.50
  19  -3   0   58.69   19.70
  19  -3   0   67.99   22.80
  19   3   0   58.99   20.80
 -19   3   0   96.69   29.30
  19   3   0   64.69   17.40
  19   3   0   73.49   18.00
 -19   3   0   60.69   22.50
  21  -3   0    4.50   19.30
  21  -3   0   16.10   23.10
 -21  -3   0  -49.10   33.30
 -21   3   0   -6.80   28.10
  21   3   0   36.10   20.20
  21   3   0   23.70   19.10
 -21   3   0   33.00   24.40
  23  -3   0   96.89   25.40
 -23  -3   0   46.40   41.70
  23  -3   0  120.69   30.00
  23   3   0  108.69   23.70
 -23   3   0   83.89   29.50
 -23   3   0  104.29   37.00
 -25  -3   0   62.79   44.90
  25  -3   0  102.29   31.60
  25  -3   0   92.89   26.30
 -25   3   0  142.19   34.80
 -25   3   0   98.99   41.30
  25   3   0  115.99   26.10
   0  -4   0  654.43   25.70
   0   4   0  682.23   18.10
   0   4   0  697.93   23.40
   0   4   0  676.53   23.10
   0   4   0  689.43   26.60
  -2  -4   0  386.56   22.80
   2  -4   0  379.46   20.20
  -2   4   0  370.86   14.30
  -2   4   0  389.56   17.20
  -2   4   0  366.56   17.20
   2   4   0  382.76   18.90
   2   4   0  389.66   19.10
  -2   4   0  388.76   20.30
  -2   4   0  383.26   17.40
   4  -4   0  285.17   15.80
   4  -4   0  301.57   14.80
   4  -4   0  313.27   17.10
  -4  -4   0  271.57   24.30
  -4   4   0  309.47   15.10
  -4   4   0  303.67   18.70
   4   4   0  276.67   17.40
  -4   4   0  313.27   14.70
  -4   4   0  287.67   15.10
   4   4   0  293.27   19.00
  -4   4   0  315.57   19.50
   6  -4   0  179.58   14.40
   6  -4   0  216.38   14.70
   6  -4   0  199.58   14.50
   6  -4   0  174.88   17.80
  -6  -4   0  202.58   26.80
  -6   4   0  185.98   19.10
   6   4   0  190.08   17.00
  -6   4   0  204.88   13.00
   6   4   0  199.98   18.40
  -6   4   0  197.18   13.20
  -6   4   0  188.68   14.50
  -6   4   0  198.38   18.40
   8  -4   0   58.29   10.00
   8  -4   0   48.80   10.30
   8  -4   0   47.00   10.20
   8  -4   0   52.69   12.20
  -8  -4   0   62.09   21.00
   8   4   0   32.00   10.80
   8   4   0   43.20   12.40
  -8   4   0   52.09    8.20
  -8   4   0   54.49   13.90
  -8   4   0   40.90   12.40
  -8   4   0   38.40    8.90
   8   4   0   30.90    8.50
  -8   4   0   38.30    9.90
 -10  -4   0 1003.00   48.40
  10  -4   0  969.10   37.10
  10  -4   0 1038.90   31.30
  10  -4   0 1003.80   29.20
  10  -4   0  976.10   31.50
  10   4   0  987.70   35.90
 -10   4   0 1033.10   39.20
 -10   4   0 1011.50   32.00
  10   4   0  968.20   27.70
 -10   4   0  963.40   38.30
  10   4   0  958.40   32.00
  12  -4   0  891.71   30.80
  12  -4   0  913.21   38.40
  12  -4   0  793.72   28.50
 -12  -4   0  893.11   49.20
  12  -4   0  860.61   31.80
 -12   4   0  873.41   39.30
  12   4   0  849.91   35.40
  12   4   0  814.12   27.40
 -12   4   0  842.72   31.60
 -12   4   0  873.51   39.20
  12   4   0  847.82   31.20
  14  -4   0  868.71   40.30
  14  -4   0  829.62   33.90
  14  -4   0  755.72   30.50
 -14  -4   0  759.82   51.59
  14  -4   0  812.32   32.80
  14   4   0  819.62   30.00
  14   4   0  811.32   32.30
 -14   4   0  798.42   42.20
  14   4   0  787.12   37.00
 -14   4   0  828.62   40.40
 -14   4   0  819.32   33.70
  16  -4   0   78.69   17.00
  16  -4   0   71.39   19.00
 -16  -4   0   64.39   30.70
  16  -4   0   66.89   26.10
 -16   4   0   58.99   16.80
  16   4   0   88.29   19.30
 -16   4   0   90.79   24.90
  16   4   0   94.69   16.40
 -16   4   0  107.89   21.30
  16   4   0   92.89   17.60
 -18  -4   0   67.69   34.50
  18  -4   0   74.19   19.20
  18  -4   0   86.29   23.40
 -18   4   0   86.19   23.90
 -18   4   0  103.19   28.20
  18   4   0   84.29   18.80
  18   4   0   90.49   21.50
  18   4   0   74.79   18.20
  20  -4   0    1.60   19.10
 -20  -4   0  -39.20   32.10
  20  -4   0   18.90   22.70
  20   4   0   29.50   17.80
  20   4   0  -14.90   16.20
  20   4   0   29.80   19.90
 -20   4   0  -16.50   25.20
 -20   4   0    1.60   22.40
  22  -4   0    9.60   21.70
  22  -4   0    5.30   25.10
 -22  -4   0  -39.00   37.70
  22   4   0   54.29   25.60
 -22   4   0   36.50   32.50
  22   4   0   35.20   20.60
 -22   4   0   20.60   27.10
 -24  -4   0  -12.90   42.00
  24  -4   0   52.39   30.80
  24  -4   0  129.59   27.70
 -24   4   0  109.69   33.70
 -24   4   0   45.10   36.50
  24   4   0  115.59   24.80
  26  -4   0   32.10   30.00
 -26  -4   0  -70.09   41.00
  26  -4   0   40.60   26.80
 -26   4   0    4.70   38.50
  26   4   0   88.49   25.30
 -26   4   0   54.09   32.90
  -1  -5   0    0.40   11.20
   1  -5   0    6.80    6.40
   1  -5   0   -8.00   10.50
  -1   5   0    4.80    7.10
  -1   5   0    7.90    7.90
  -1   5   0   10.80    6.30
   1   5   0    8.90    9.00
  -1   5   0   16.80    8.80
   1   5   0   14.30    8.90
  -1   5   0    2.20   10.80
   3  -5   0  270.27   17.50
   3  -5   0  299.27   21.20
  -3  -5   0  277.07   26.30
  -3   5   0  284.57   15.90
  -3   5   0  300.37   21.50
  -3   5   0  306.97   17.50
   3   5   0  306.87   20.60
  -3   5   0  285.57   18.10
  -3   5   0  256.87   19.00
   3   5   0  305.17   20.40
   5  -5   0   18.30    9.20
   5  -5   0   50.09   10.50
  -5  -5   0   23.20   18.20
   5  -5   0   30.30   11.40
   5  -5   0   33.90   10.20
   5   5   0   42.40   11.70
  -5   5   0   32.40    9.50
  -5   5   0   20.00   11.90
  -5   5   0   51.59    8.90
  -5   5   0   29.00   11.40
  -5   5   0   45.40    9.40
   5   5   0   32.60   11.50
   7  -5   0  227.38   19.00
  -7  -5   0  273.47   34.40
   7  -5   0  314.77   19.00
   7  -5   0  307.37   18.90
   7  -5   0  259.97   21.70
  -7   5   0  277.57   18.60
  -7   5   0  291.87   16.90
   7   5   0  244.98   22.40
  -7   5   0  297.87   23.60
   7   5   0  278.57   21.00
  -7   5   0  215.38   17.30
  -7   5   0  253.47   23.70
   9  -5   0  117.89   16.10
  -9  -5   0  127.29   26.20
   9  -5   0  114.99   13.20
   9  -5   0  144.79   17.10
   9  -5   0  108.19   13.40
   9   5   0  103.19   11.50
  -9   5   0  134.89   17.70
  -9   5   0  107.49   13.20
   9   5   0  108.69   16.60
   9   5   0  102.29   15.10
  -9   5   0  130.59   14.60
  -9   5   0  119.89   13.50
  -9   5   0  118.49   17.70
  11  -5   0   94.19   16.00
  11  -5   0  118.69   14.10
  11  -5   0   94.49   14.00
  11  -5   0  102.09   14.50
 -11  -5   0   96.89   26.90
  11   5   0  103.29   12.20
 -11   5   0  117.69   18.50
 -11   5   0   99.89   14.10
  11   5   0  105.39   16.00
 -11   5   0  112.99   19.40
  11   5   0  113.59   17.70
 -13  -5   0   94.89   29.70
  13  -5   0   89.29   14.00
  13  -5   0   79.99   17.10
  13  -5   0   71.29   13.60
  13  -5   0   79.69   15.60
  13   5   0   89.29   15.80
 -13   5   0  115.79   22.50
 -13   5   0   99.29   15.00
  13   5   0   65.39   13.40
  13   5   0   87.59   17.40
  15  -5   0  101.19   20.00
  15  -5   0   66.29   19.10
  15  -5   0   89.99   17.30
 -15  -5   0   76.19   32.30
  15   5   0   44.40   17.30
 -15   5   0  101.59   24.60
 -15   5   0   82.09   19.50
 -15   5   0   79.19   17.50
  15   5   0   91.19   15.40
  15   5   0   99.29   18.00
  17  -5   0   34.90   19.00
  17  -5   0   74.39   19.50
 -17  -5   0   28.60   33.20
 -17   5   0   27.70   19.70
  17   5   0   42.80   15.90
 -17   5   0   37.70   25.50
 -17   5   0   53.89   21.00
  17   5   0   52.39   17.20
  17   5   0   26.90   19.40
  19  -5   0   21.30   20.40
 -19  -5   0    0.50   36.90
  19  -5   0    0.70   22.00
 -19   5   0   32.60   27.30
  19   5   0   55.59   21.90
  19   5   0   44.20   17.30
  19   5   0    5.00   17.30
 -19   5   0  -21.10   22.30
 -21  -5   0   -8.60   38.40
  21  -5   0   -5.30   25.30
  21  -5   0  -14.40   21.70
  21   5   0   50.89   19.20
  21   5   0   36.20   22.60
 -21   5   0  -29.20   25.60
 -21   5   0   13.80   29.00
  21   5   0   21.70   30.10
 -23  -5   0  -34.80   42.10
  23  -5   0    0.40   27.90
  23  -5   0   14.00   24.30
 -23   5   0   30.70   33.10
  23   5   0   63.39   21.50
 -23   5   0  -21.50   28.70
  25  -5   0    7.30   25.20
 -25  -5   0  -74.59   41.90
  25  -5   0   -3.10   30.50
  25   5   0    3.80   32.30
 -25   5   0   27.00   36.90
 -25   5   0    6.50   32.40
   0  -6   0 1339.87   44.60
   0   6   0 1382.76   40.00
   0   6   0 1376.06   40.50
   0   6   0 1449.76   46.20
  -2  -6   0  840.42   37.60
   2  -6   0  835.62   26.60
   2  -6   0  842.32   35.10
  -2   6   0  835.62   27.80
  -2   6   0  887.31   35.80
   2   6   0  874.71   32.80
  -2   6   0  815.72   25.10
  -2   6   0  834.92   30.50
   2   6   0  826.52   32.80
  -2   6   0  888.31   31.20
   4  -6   0   36.00   13.70
   4  -6   0   39.80   14.60
   4  -6   0   39.70   11.40
   4  -6   0   28.40   10.10
  -4  -6   0    5.40   19.30
  -4   6   0   36.40    9.60
  -4   6   0   39.10   13.80
   4   6   0   35.30   12.50
   4   6   0   34.70   12.80
  -4   6   0   31.50    9.70
  -4   6   0   42.10   11.70
  -4   6   0   45.40   11.40
  -6  -6   0   58.59   21.50
   6  -6   0   59.19   12.70
   6  -6   0   70.19   16.50
   6  -6   0   63.59   11.60
   6  -6   0   80.89   14.20
   6  -6   0   63.49   12.80
  -6   6   0   75.39   15.80
  -6   6   0   60.49   11.20
  -6   6   0   64.49   11.60
   6   6   0   67.09   14.10
   6   6   0   57.59   13.60
  -6   6   0   70.39   12.00
  -6   6   0   45.60   13.60
  -8  -6   0  412.76   40.60
   8  -6   0  426.76   23.30
   8  -6   0  399.36   24.80
   8  -6   0  425.16   27.50
   8  -6   0  441.16   24.00
  -8   6   0  429.56   29.30
  -8   6   0  463.35   29.40
  -8   6   0  435.26   21.90
  -8   6   0  428.66   23.50
   8   6   0  408.46   26.60
   8   6   0  412.46   28.20
  -8   6   0  395.36   22.60
  10  -6   0  605.94   26.60
  10  -6   0  575.64   33.10
 -10  -6   0  580.14   47.30
  10  -6   0  557.94   27.50
  10  -6   0  580.14   28.00
 -10   6   0  552.34   24.50
 -10   6   0  579.34   28.20
 -10   6   0  547.75   34.90
 -10   6   0  562.44   24.70
  10   6   0  553.94   30.50
  10   6   0  603.84   33.60
 -10   6   0  618.14   35.20
  12  -6   0  989.20   37.50
 -12  -6   0 1115.39   60.69
  12  -6   0 1177.68   36.40
  12  -6   0 1133.19   46.20
  12  -6   0 1144.39   39.50
 -12   6   0 1137.79   46.90
  12   6   0 1152.78   42.20
 -12   6   0 1197.08   40.00
 -12   6   0 1053.59   47.80
  12   6   0 1066.59   44.90
  12   6   0 1077.59   34.90
  14  -6   0  778.62   43.00
  14  -6   0  728.93   35.20
  14  -6   0  747.63   31.70
 -14  -6   0  770.32   60.49
 -14   6   0  772.62   43.50
  14   6   0  706.73   40.10
 -14   6   0  722.63   45.00
 -14   6   0  759.32   36.60
  14   6   0  689.43   32.20
  14   6   0  683.03   36.60
  16  -6   0  192.78   23.50
  16  -6   0  179.38   26.30
 -16  -6   0  215.38   43.00
  16   6   0  168.98   23.80
  16   6   0  174.68   25.80
 -16   6   0  198.88   32.20
 -16   6   0  188.18   24.60
 -16   6   0  319.77   37.50
  16   6   0  183.08   19.80
  18  -6   0    4.20   20.90
  18  -6   0   41.70   20.70
 -18  -6   0   -3.40   37.60
 -18   6   0   18.00   25.80
 -18   6   0   -5.80   21.90
 -18   6   0   11.70   23.50
  18   6   0   20.80   21.20
  18   6   0   39.50   18.00
  18   6   0    6.50   18.70
  20  -6   0    9.20   20.60
  20  -6   0  -22.10   23.20
 -20  -6   0  -13.90   40.20
 -20   6   0   25.50   29.80
  20   6   0    7.00   20.30
  20   6   0   33.20   23.50
  20   6   0   12.80   18.50
 -20   6   0  -14.40   27.10
 -22  -6   0   42.90   45.50
  22  -6   0   90.29   32.30
 -22   6   0   43.20   32.50
 -22   6   0   85.79   35.80
  22   6   0  118.49   28.00
 -24  -6   0  -23.30   45.40
  24  -6   0   12.60   26.00
  24  -6   0   18.20   31.80
 -24   6   0   30.40   33.30
 -24   6   0    3.60   35.40
  -1  -7   0  403.56   30.90
   1  -7   0  419.66   29.40
   1   7   0  391.36   25.60
  -1   7   0  399.16   19.60
  -1   7   0  417.66   31.10
  -1   7   0  410.06   25.50
  -1   7   0  388.86   25.30
   1   7   0  415.26   25.70
   3  -7   0  162.58   17.50
   3  -7   0  172.38   23.80
  -3  -7   0  159.48   25.40
  -3   7   0  183.88   19.20
  -3   7   0  148.89   18.30
   3   7   0  180.18   19.60
   3   7   0  156.98   19.50
  -3   7   0  146.89   17.90
  -3   7   0  170.48   24.50
  -3   7   0  154.98   14.10
   5  -7   0  287.47   26.60
  -5  -7   0  220.98   29.40
   5  -7   0  219.88   21.70
   5  -7   0  227.38   19.90
   5  -7   0  221.58   22.60
   5  -7   0  211.98   22.20
  -5   7   0  206.18   19.60
   5   7   0  246.18   23.50
   5   7   0  230.88   23.80
  -5   7   0  228.38   23.20
  -5   7   0  234.38   19.70
  -5   7   0  259.87   26.00
  -5   7   0  236.78   21.90
   7  -7   0  157.38   18.50
   7  -7   0  136.89   15.90
   7  -7   0   90.29   16.60
   7  -7   0  136.09   21.80
  -7  -7   0  139.29   28.50
  -7   7   0  136.19   16.60
  -7   7   0  178.38   20.10
   7   7   0  109.69   18.60
  -7   7   0  126.19   18.30
   7   7   0  141.79   19.10
  -7   7   0  132.49   21.60
  -7   7   0  137.79   15.20
   9  -7   0  656.93   36.30
   9  -7   0  617.34   31.40
  -9  -7   0  650.13   50.19
   9  -7   0  666.63   30.40
   9  -7   0  698.23   31.90
  -9   7   0  586.84   38.60
  -9   7   0  669.23   29.60
   9   7   0  616.94   34.20
  -9   7   0  603.64   28.50
   9   7   0  650.53   36.90
  -9   7   0  650.83   37.10
  -9   7   0  667.73   30.00
  11  -7   0  837.92   37.80
 -11  -7   0  868.81   59.59
  11  -7   0  923.61   43.90
  11  -7   0  946.01   37.50
  11  -7   0  981.70   36.20
 -11   7   0  955.90   37.70
  11   7   0  874.51   43.20
 -11   7   0  966.90   45.00
 -11   7   0  864.91   46.80
 -11   7   0  967.60   34.00
  11   7   0  918.61   40.90
 -11   7   0  862.21   34.20
  13  -7   0  955.10   47.30
 -13  -7   0  814.22   63.49
  13  -7   0  954.90   40.10
  13  -7   0  750.52   36.90
  13  -7   0  864.11   36.70
 -13   7   0  902.51   48.80
  13   7   0  882.81   36.00
  13   7   0  814.92   44.80
 -13   7   0  912.31   47.70
  13   7   0  853.11   41.60
 -13   7   0  910.01   40.10
  15  -7   0  430.56   33.30
  15  -7   0  407.26   40.70
 -15  -7   0  310.57   49.30
  15   7   0  362.46   34.10
 -15   7   0  450.55   40.80
 -15   7   0  411.46   41.50
  15   7   0  383.86   36.70
 -15   7   0  387.96   33.70
  15   7   0  377.66   30.20
  17  -7   0   34.20   20.40
  17  -7   0   -8.30   22.90
 -17  -7   0   21.50   41.60
  17   7   0   22.40   21.60
 -17   7   0   44.10   25.50
 -17   7   0   25.10   26.40
  17   7   0   58.79   23.80
 -17   7   0    9.70   20.70
  19  -7   0  -24.40   23.60
 -19  -7   0  -38.00   40.80
  19  -7   0   -7.10   22.20
 -19   7   0  -35.10   22.70
  19   7   0   23.70   22.00
 -19   7   0  -19.20   26.00
 -19   7   0   -7.50   27.70
  19   7   0   34.30   25.20
  21  -7   0  -21.50   23.60
  21  -7   0   14.90   27.30
 -21  -7   0 -103.89   43.70
  21   7   0  -24.00   23.30
 -21   7   0   -3.60   29.60
  21   7   0   12.50   22.10
 -21   7   0  -21.90   28.00
 -23  -7   0 -101.19   45.30
  23  -7   0   26.10   29.20
  23  -7   0    4.70   26.20
 -23   7   0   52.59   32.50
 -23   7   0  -30.70   31.00
  23   7   0    7.00   28.10
   0  -8   0  137.49   22.80
   0   8   0  139.49   18.20
   0   8   0  136.59   14.40
   0   8   0  111.49   18.80
   2  -8   0   77.19   12.60
  -2  -8   0   90.49   22.80
   2  -8   0   95.99   20.70
   2   8   0   83.39   16.60
  -2   8   0   55.09   13.20
  -2   8   0   74.09   12.90
  -2   8   0   85.29   16.00
  -2   8   0   98.99   17.00
  -2   8   0   72.39   21.40
   2   8   0   78.49   16.00
   4  -8   0  220.28   26.10
   4  -8   0  244.48   23.20
  -4  -8   0  209.28   31.10
   4  -8   0  286.37   26.40
   4  -8   0  260.07   30.00
  -4   8   0  257.77   26.40
  -4   8   0  258.47   32.00
  -4   8   0  268.37   23.60
   4   8   0  203.08   24.30
   4   8   0  232.78   25.70
  -4   8   0  234.18   23.80
  -4   8   0  214.68   21.70
   6  -8   0  142.89   25.90
   6  -8   0  187.48   22.50
   6  -8   0  210.78   25.20
   6  -8   0  167.18   18.20
  -6  -8   0  158.18   32.00
   6  -8   0  183.58   23.30
  -6   8   0  154.18   19.60
  -6   8   0  140.19   25.70
   6   8   0  264.97   26.70
  -6   8   0  153.78   17.10
  -6   8   0  154.08   20.20
  -6   8   0  206.38   22.70
   6   8   0  157.58   22.50
   8  -8   0   63.09   20.50
  -8  -8   0  124.39   32.80
   8  -8   0  126.79   17.40
   8  -8   0   91.69   19.50
   8  -8   0  107.29   18.70
   8  -8   0  124.89   25.10
  -8   8   0  129.59   17.50
   8   8   0  135.79   20.70
  -8   8   0   86.09   23.80
  -8   8   0   83.39   18.60
   8   8   0  107.99   21.20
  -8   8   0  120.79   18.10
  -8   8   0  133.49   20.60
  10  -8   0   84.49   17.80
  10  -8   0   63.89   19.10
  10  -8   0   91.19   20.60
  10  -8   0   62.79   25.00
  10  -8   0   75.39   19.70
 -10  -8   0   67.69   34.60
  10   8   0   60.19   20.10
 -10   8   0   91.39   20.70
 -10   8   0   72.19   17.90
 -10   8   0   70.79   23.20
 -10   8   0   74.49   16.40
 -10   8   0   67.49   17.60
  10   8   0   93.79   20.10
  12  -8   0   57.19   22.00
  12  -8   0   75.09   19.90
  12  -8   0   90.49   19.30
  12  -8   0   59.29   20.50
 -12  -8   0   28.20   38.00
 -12   8   0  127.19   25.70
 -12   8   0  102.69   18.30
  12   8   0   67.99   20.60
 -12   8   0   64.79   15.70
 -12   8   0   62.29   22.60
  12   8   0   38.30   21.30
  14  -8   0  136.89   22.60
 -14  -8   0  117.59   43.90
  14  -8   0   85.29   26.30
  14   8   0   87.79   24.40
 -14   8   0  137.09   23.70
  14   8   0  110.29   24.50
 -14   8   0   85.39   27.70
 -14   8   0  179.88   30.20
  16  -8   0   35.60   25.80
 -16  -8   0   38.80   46.80
  16  -8   0   37.20   21.00
  16   8   0   39.50   22.80
 -16   8   0   18.50   21.70
  16   8   0   37.60   24.40
 -16   8   0   13.90   26.90
 -16   8   0   63.99   27.20
  18  -8   0   66.59   28.30
 -18  -8   0   48.60   47.40
  18  -8   0   59.19   24.40
 -18   8   0  133.89   31.80
  18   8   0   73.69   24.60
 -18   8   0   98.69   32.00
 -18   8   0   90.19   27.50
  18   8   0   66.39   26.60
  20  -8   0   24.50   28.10
  20  -8   0   -4.80   24.70
 -20   8   0   27.80   29.30
 -20   8   0   11.00   28.00
 -20   8   0   55.69   31.90
  20   8   0   63.29   28.60
  20   8   0   10.80   24.70
 -22  -8   0  -77.29   48.50
  22  -8   0   49.60   27.80
  22  -8   0   58.99   31.10
 -22   8   0   54.59   34.40
  22   8   0   66.69   29.80
 -22   8   0   36.50   35.30
  22   8   0   51.29   29.80
  -1  -9   0  777.92   46.70
   1  -9   0  764.22   45.90
  -1   9   0  854.31   39.30
   1   9   0  823.32   39.80
  -1   9   0  832.62   40.40
  -1   9   0  804.02   31.90
   1   9   0  777.72   40.10
  -3  -9   0  686.73   47.80
   3  -9   0  626.14   43.40
   3  -9   0  683.43   32.00
   3  -9   0  718.53   37.20
  -3   9   0  714.83   31.00
  -3   9   0  708.33   37.70
   3   9   0  638.34   38.20
  -3   9   0  637.74   36.70
  -3   9   0  709.83   33.60
  -3   9   0  676.03   45.40
   3   9   0  709.23   37.90
   5  -9   0  220.58   26.20
   5  -9   0  154.18   23.30
   5  -9   0  162.38   19.20
   5  -9   0  224.68   27.20
  -5  -9   0  179.58   33.90
   5  -9   0  148.29   29.00
  -5   9   0  170.78   22.40
  -5   9   0  162.78   22.80
   5   9   0  167.98   24.40
   5   9   0  271.97   29.50
  -5   9   0  152.88   18.30
  -5   9   0  161.08   29.00
  -5   9   0  245.88   27.50
   7  -9   0   22.60   17.80
  -7  -9   0   21.20   28.60
   7  -9   0   37.20   15.60
   7  -9   0   19.20   15.70
   7  -9   0   -7.90   18.70
  -7   9   0   27.30   15.10
   7   9   0   18.10   17.00
  -7   9   0   18.20   15.10
  -7   9   0   11.40   16.10
  -7   9   0  -37.20   23.50
   7   9   0   29.80   17.40
  -7   9   0    2.40   17.10
   9  -9   0  -29.40   16.70
   9  -9   0   -2.90   15.20
  -9  -9   0    2.90   31.90
   9  -9   0  -14.10   21.40
   9  -9   0    5.10   17.80
   9   9   0   15.90   18.20
  -9   9   0  -16.90   14.80
  -9   9   0   -1.10   20.70
  -9   9   0  -30.30   15.30
  -9   9   0  -23.90   17.30
  -9   9   0  -21.10   14.60
   9   9   0    9.20   18.50
  11  -9   0    0.70   17.00
  11  -9   0    9.60   18.10
  11  -9   0   20.90   24.30
  11  -9   0   26.10   20.40
 -11  -9   0   62.29   39.70
  11  -9   0   36.00   18.90
 -11   9   0   38.60   23.30
 -11   9   0   20.10   21.40
  11   9   0   43.70   21.40
  11   9   0   22.70   19.30
 -11   9   0   44.20   18.60
 -11   9   0   32.10   15.50
 -11   9   0   58.99   17.80
  13  -9   0   45.40   21.40
 -13  -9   0   13.80   41.60
  13  -9   0    2.40   21.90
  13   9   0   30.50   21.00
 -13   9   0   21.60   24.20
  13   9   0   43.30   23.70
 -13   9   0   39.20   20.00
 -13   9   0   69.99   23.80
  15  -9   0  -24.60   19.80
  15  -9   0   15.40   24.20
 -15  -9   0  -85.79   41.90
 -15   9   0  -23.30   20.90
 -15   9   0   -0.30   24.30
  15   9   0   59.59   22.20
 -15   9   0   43.20   24.60
  15   9   0   -5.60   24.10
  17  -9   0  -11.40   24.00
  17  -9   0   -3.50   21.20
 -17   9   0  -16.50   26.00
 -17   9   0   44.00   25.90
 -17   9   0   26.50   23.80
  17   9   0   19.50   25.10
  17   9   0   11.40   22.10
  19  -9   0   95.39   28.00
  19  -9   0   89.19   31.60
 -19  -9   0   56.39   50.99
 -19   9   0   93.19   31.10
  19   9   0  114.39   31.50
 -19   9   0  133.99   42.80
  19   9   0  155.68   30.50
 -19   9   0   93.89   34.90
 -21  -9   0   -9.10   51.09
  21  -9   0  127.79   35.80
  21  -9   0  114.99   28.60
 -21   9   0  104.29   36.20
  21   9   0   87.49   28.40
  21   9   0  106.99   31.80
   0 -10   0  950.90   54.09
   0  10   0  921.41   45.60
   0  10   0  865.31   46.90
   2 -10   0  741.23   49.90
  -2 -10   0  795.72   53.19
  -2  10   0  775.52   43.00
   2  10   0  721.93   43.70
  -2  10   0  809.92   34.80
   2  10   0  795.12   43.20
  -2  10   0  811.12   44.50
   4 -10   0  382.86   28.50
   4 -10   0  325.57   41.70
   4 -10   0  323.87   33.60
   4 -10   0  372.66   35.10
   4 -10   0  342.07   35.70
  -4 -10   0  389.56   46.20
   4  10   0  340.97   33.70
   4  10   0  373.26   35.80
  -4  10   0  312.67   32.50
  -4  10   0  401.56   27.90
  -4  10   0  392.16   43.30
  -4  10   0  355.86   35.00
   6 -10   0   70.49   22.80
   6 -10   0   84.59   17.90
   6 -10   0   31.70   27.40
   6 -10   0   59.29   17.60
   6 -10   0   43.90   21.40
  -6 -10   0   53.89   32.10
   6  10   0   60.79   21.90
  -6  10   0   51.29   19.60
   6  10   0   50.89   20.40
  -6  10   0   75.39   19.70
  -6  10   0   44.50   19.30
  -6  10   0   34.70   26.50
  -8 -10   0    8.50   33.30
   8 -10   0   -8.50   15.90
   8 -10   0  -30.30   19.70
   8 -10   0   -9.50   17.30
   8 -10   0  -19.20   24.00
   8 -10   0  -13.30   19.20
   8  10   0   -6.90   19.20
  -8  10   0   -2.60   18.40
  -8  10   0   -2.10   15.60
  -8  10   0  -32.70   21.20
   8  10   0  -26.00   17.60
  -8  10   0   15.90   17.70
  -8  10   0  -18.40   15.00
  10 -10   0   42.90   21.30
 -10 -10   0   74.79   40.30
  10 -10   0   53.59   21.10
  10 -10   0   45.20   27.40
  10 -10   0   30.90   19.20
  10 -10   0   31.40   21.80
 -10  10   0   44.00   19.00
  10  10   0   32.00   21.80
 -10  10   0   32.50   20.90
 -10  10   0   27.50   24.60
  10  10   0   39.90   22.20
 -10  10   0   69.39   20.40
 -10  10   0   32.30   17.50
 -12 -10   0  -11.10   40.30
  12 -10   0    8.70   26.20
  12 -10   0   35.50   25.50
  12 -10   0   13.60   19.10
  12 -10   0   31.10   21.60
 -12  10   0   -2.30   23.40
 -12  10   0   16.00   19.10
 -12  10   0   20.20   22.50
  12  10   0   17.10   22.20
  12  10   0   12.20   21.30
 -14 -10   0  -21.20   44.50
  14 -10   0  -11.30   19.60
  14 -10   0    2.80   28.50
  14 -10   0   -9.00   21.50
  14  10   0   11.50   23.40
  14  10   0    5.20   23.60
 -14  10   0    3.80   21.10
 -14  10   0   21.40   25.60
 -14  10   0   19.60   26.50
  16 -10   0  -27.30   37.40
  16 -10   0   -1.40   21.60
  16 -10   0   -6.90   24.10
 -16 -10   0  -41.50   47.00
 -16  10   0  114.89   34.50
 -16  10   0  -31.00   22.70
  16  10   0   23.20   24.60
  16  10   0   11.90   26.10
  18 -10   0   20.80   27.90
  18 -10   0    0.20   24.60
 -18 -10   0  -64.59   49.60
  18  10   0   22.10   27.90
 -18  10   0  -16.80   27.00
  18  10   0    1.80   25.10
 -18  10   0   51.19   32.50
  -1 -11   0  307.57   45.50
   1 -11   0  347.17   44.60
   1  11   0  305.37   36.30
  -1  11   0  229.38   30.10
   1  11   0  348.67   36.00
  -1  11   0  245.48   30.70
  -3 -11   0   61.49   34.60
   3 -11   0   88.79   29.50
   3 -11   0   86.69   23.90
   3  11   0   30.20   20.70
  -3  11   0   20.20   19.20
  -3  11   0   79.09   24.40
   3  11   0   30.80   22.40
  -5 -11   0  138.89   36.70
   5 -11   0  145.69   28.60
   5 -11   0  146.39   31.00
   5 -11   0   93.49   20.50
   5 -11   0  154.38   28.60
  -5  11   0  116.29   23.70
   5  11   0  117.69   27.00
  -5  11   0  114.49   24.30
  -5  11   0  113.19   23.40
  -5  11   0  128.39   32.70
   7 -11   0  145.39   32.20
   7 -11   0  108.09   20.50
   7 -11   0  131.49   27.00
   7 -11   0   94.19   26.80
   7 -11   0   55.09   29.40
  -7 -11   0  124.29   38.30
  -7  11   0  103.29   24.20
  -7  11   0  113.29   25.30
  -7  11   0  116.49   31.80
  -7  11   0  150.78   22.20
   7  11   0   93.59   25.70
   7  11   0   90.59   24.00
   9 -11   0   11.10   22.50
   9 -11   0   33.20   19.70
   9 -11   0   15.80   23.90
   9 -11   0   72.89   19.90
   9 -11   0   24.60   27.90
  -9 -11   0   26.00   37.50
  -9  11   0   23.20   21.50
  -9  11   0   26.50   20.10
   9  11   0   51.29   24.20
  -9  11   0   24.30   26.70
  -9  11   0   30.60   17.90
   9  11   0  -14.10   21.50
  -9  11   0   31.60   21.10
  11 -11   0   32.80   22.50
 -11 -11   0   11.70   40.30
  11 -11   0   40.70   24.80
  11 -11   0   47.50   31.90
  11 -11   0   34.40   20.70
  11  11   0   40.90   24.40
  11  11   0   24.30   23.90
 -11  11   0   57.99   21.50
 -11  11   0   69.39   25.50
  13 -11   0   -1.30   22.90
 -13 -11   0   22.40   45.00
  13 -11   0    5.50   23.20
 -13  11   0  -10.00   22.40
  13  11   0   20.00   25.80
  13  11   0  -16.60   24.50
 -13  11   0   -6.50   26.10
  15 -11   0   20.70   26.90
  15 -11   0   43.80   24.50
 -15 -11   0   20.10   49.30
 -15  11   0   49.80   26.50
 -15  11   0    5.40   29.80
  15  11   0   72.69   28.60
  15  11   0   10.80   27.00
 -17 -11   0  -25.70   51.89
  17 -11   0   19.70   28.00
  17 -11   0   22.90   25.30
 -17  11   0   17.50   31.30
  17  11   0   42.80   29.60
 -17  11   0   29.70   28.30
  17  11   0    4.90   26.60
   0 -12   0   36.40   29.30
   0  12   0   60.59   23.90
   0  12   0    6.50   20.50
   2 -12   0   70.99   29.20
   2 -12   0   93.59   26.80
  -2 -12   0   25.60   31.10
   2  12   0   47.80   23.00
  -2  12   0   48.80   25.70
  -2  12   0   24.20   21.20
   2  12   0   43.80   24.10
   4 -12   0   32.30   24.70
   4 -12   0   98.09   30.00
   4 -12   0   86.89   25.80
  -4 -12   0   69.59   34.90
   4  12   0   74.09   25.00
   4  12   0   23.70   23.60
  -4  12   0   54.09   25.20
  -4  12   0   61.09   22.90
   6 -12   0   12.20   23.30
  -6 -12   0   31.20   34.50
   6 -12   0   54.49   29.20
   6 -12   0   34.40   25.10
  -6  12   0   19.60   20.50
   6  12   0    6.30   22.70
   6  12   0   -0.50   21.50
  -6  12   0    9.10   21.90
   8 -12   0  109.59   28.90
  -8 -12   0  167.58   44.20
   8 -12   0   45.80   28.00
   8  12   0  126.19   28.70
  -8  12   0   79.79   25.70
  -8  12   0   78.29   25.10
   8  12   0   67.49   26.50
  10 -12   0  124.09   28.50
 -10 -12   0  119.09   47.30
  10 -12   0   85.89   29.30
  10  12   0   96.19   29.20
 -10  12   0   92.09   33.30
  10  12   0   95.29   28.70
 -12 -12   0   44.00   48.90
  12 -12   0   76.69   27.20
  12 -12   0   93.39   26.10
 -12  12   0   90.39   34.50
  12  12   0   76.19   29.90
  12  12   0   25.90   27.50
 -12  12   0   46.90   29.20
  14 -12   0  121.09   28.00
 -14 -12   0   18.00   51.59
  14 -12   0  106.29   30.10
 -14  12   0  169.18   32.30
  14  12   0  152.38   35.00
 -14  12   0  167.78   35.00
  14  12   0  126.49   32.80
  -1 -13   0  100.99   35.60
   1 -13   0   79.59   28.50
   1 -13   0  146.99   46.50
   1  13   0   26.10   23.80
   1  13   0   26.80   27.40
  -1  13   0   18.10   24.20
  -1  13   0   44.30   28.90
   3 -13   0  -44.60   27.50
   3 -13   0   54.19   26.50
  -3 -13   0   89.89   33.90
   3  13   0   41.60   24.70
  -3  13   0   24.30   26.90
   3  13   0    1.50   23.90
  -3  13   0   16.60   24.10
   5 -13   0  -63.39   24.40
   5 -13   0   13.60   27.60
  -5 -13   0   49.50   35.90
   5  13   0  -39.10   23.90
  -5  13   0    0.80   23.10
  -5  13   0  -17.00   21.20
   5  13   0   27.70   25.10
   7 -13   0   -5.00   26.50
   7 -13   0   13.50   27.90
  -7 -13   0   84.39   42.90
  -7  13   0    2.20   21.70
   7  13   0   38.00   26.00
  -7  13   0   15.10   25.00
   7  13   0    4.20   27.60
   9 -13   0  100.99   31.20
  -9 -13   0   90.59   46.60
   9  13   0   98.29   30.80
  -9  13   0   94.69   31.10
   9  13   0   93.09   31.40
 -11 -13   0   74.59   48.60
  11  13   0   91.79   31.20
  11  13   0   53.19   31.10
   0 -14   0   74.59   30.20
   0  14   0  -18.10   28.10
   0  14   0    1.70   25.70
   2 -14   0   35.10   28.10
   2 -14   0    4.10   30.20
   2  14   0   23.70   30.30
  -2  14   0   -6.40   27.00
  -2  14   0   -5.60   25.50
   2  14   0  -13.80   26.50
   4 -14   0   33.60   29.30
   4 -14   0   26.40   29.50
   4  14   0   -7.80   27.40
  -4  14   0  -10.90   24.60
  -4  14   0   32.50   27.10
   4  14   0    2.30   26.80
   6 -14   0   60.19   31.70
   6 -14   0   20.80   29.70
  -6 -14   0  109.99   53.59
   6  14   0   15.20   28.10
   6  14   0    3.30   28.90
  -6  14   0   15.30   25.00
  -6  14   0   16.70   25.70
 -26   0   1  -58.19   36.50
 -26   0   1  -35.50   24.70
  26   0  -1   -3.30   22.50
  26   0  -1   43.40   26.50
 -24   0   1    8.40   24.30
 -24   0   1  -26.30   36.00
  24   0  -1   34.30   24.20
  24   0  -1   35.30   22.40
 -22   0   1   49.99   22.00
  22   0  -1   46.50   21.60
  22   0  -1    3.00   20.10
 -22   0   1   25.00   33.60
 -20   0   1   58.39   28.80
 -20   0   1   46.10   19.90
  20   0  -1   57.19   18.60
  20   0  -1   29.20   18.90
  20   0  -1   62.29   20.80
  18   0  -1   93.79   20.70
 -18   0   1  133.59   20.90
  18   0  -1  118.49   18.70
  18   0  -1  131.29   20.40
 -18   0   1  123.39   28.80
  16   0  -1   38.90   13.00
  16   0  -1   57.99   14.50
 -16   0   1   60.79   14.30
  16   0  -1   53.39   17.10
 -16   0   1   70.49   21.90
 -14   0   1   16.50   16.60
  14   0  -1   15.90   10.60
  14   0  -1   21.80   11.40
 -14   0   1   27.80   11.90
  14   0  -1   16.40   14.00
 -12   0   1   -5.50   12.70
  12   0  -1   -0.20   12.20
 -12   0   1   -2.70    8.40
  12   0  -1  -13.20    8.00
  12   0  -1   -3.90    8.20
  10   0  -1   52.79    9.70
  10   0  -1   81.49   12.30
  10   0  -1   60.79    9.10
 -10   0   1   57.29   13.60
 -10   0   1   52.19   10.20
  -8   0   1  191.48   14.30
   8   0  -1  184.48   13.80
   8   0  -1  210.68   15.60
  -8   0   1  205.58   17.70
   8   0  -1  182.08   12.20
  -6   0   1  228.08   15.80
   6   0  -1  277.77   15.30
   6   0  -1  211.58   11.00
   6   0  -1  213.88   12.20
  -6   0   1  197.38   12.50
  -4   0   1    3.00    4.50
   4   0  -1    3.70    4.00
   4   0  -1   -3.90    2.80
   4   0  -1   -1.80    3.40
  -4   0   1   -0.40    3.40
  -2   0   1   -5.20    2.00
   2   0  -1   -5.20    2.00
   2   0  -1   -3.90    1.60
   2   0  -1   -4.50    1.80
   0   0  -1  -10.70    0.80
   0   0  -1  -13.10    0.70
   0   0  -1   -7.60    1.10
   0   0   1   -9.40    1.20
  -2   0  -1   -3.40    2.00
  -2   0  -1   -2.20    3.90
   2   0   1   -0.50    2.30
   2   0   1   -3.50    2.50
  -2   0  -1   -3.90    2.50
  -4   0  -1  225.28    9.70
  -4   0  -1  241.78   12.20
  -4   0  -1  255.07   15.00
   4   0   1  205.68    9.60
   4   0   1  231.28    9.60
  -6   0  -1  112.19   10.30
  -6   0  -1  117.39   15.70
   6   0   1  112.89   10.00
   6   0   1   82.99    7.90
   6   0   1   94.89    9.30
  -6   0  -1  105.19   12.30
   8   0   1   61.29    8.30
   8   0   1   48.20    8.00
  -8   0  -1   72.99   13.70
  -8   0  -1   55.59    9.50
   8   0   1   69.29    9.30
  10   0   1   74.19   11.20
 -10   0  -1   47.10   10.60
  10   0   1   59.39    9.70
  10   0   1   48.10    8.80
 -10   0  -1   61.89   15.60
 -12   0  -1   12.10   15.00
  12   0   1    9.20    9.20
 -12   0  -1    8.00    9.90
  12   0   1   -1.40    8.10
  12   0   1   -1.30    9.00
  12   0   1    6.70   10.40
 -14   0  -1   -9.80   16.50
  14   0   1  -11.40   10.10
  14   0   1   -9.40    8.70
  14   0   1   -7.30   10.90
 -14   0  -1   -3.60   10.50
  14   0   1    0.40   10.70
 -16   0  -1   -3.50   19.90
  16   0   1  -24.90   10.10
  16   0   1    5.30   13.40
  16   0   1   13.20   13.60
  16   0   1  -11.20   12.10
 -16   0  -1    3.40   12.90
 -18   0  -1   59.79   19.50
  18   0   1   40.40   15.20
  18   0   1   57.39   19.80
  18   0   1   88.29   19.20
 -18   0  -1   65.49   29.00
 -20   0  -1   65.79   32.80
  20   0   1   82.29   22.30
 -20   0  -1   76.19   22.40
  20   0   1   98.39   20.60
  22   0   1   44.70   25.80
 -22   0  -1   10.40   25.30
 -22   0  -1   49.40   36.40
  22   0   1  102.09   23.50
 -24   0  -1  -16.40   24.50
  24   0   1   39.40   24.60
  24   0   1   12.60   25.10
 -24   0  -1  -44.90   38.00
  26   0   1    4.50   36.40
 -26   0  -1    1.10   27.40
  26   0   1   32.20   25.60
 -26   0  -1  -36.30   40.10
 -27  -1   1   -1.90   42.20
  27  -1  -1   44.80   30.20
  27  -1  -1   50.39   26.00
 -27   1   1   11.20   28.50
 -27   1   1  -11.70   44.10
  27   1  -1   33.10   25.70
 -25  -1   1   16.60   24.10
 -25  -1   1   26.40   41.00
  25  -1  -1   43.30   24.40
  25  -1  -1   23.70   26.20
 -25   1   1   56.89   28.70
  25   1  -1    6.60   23.10
 -25   1   1  -20.50   36.50
  23  -1  -1  103.79   27.60
  23  -1  -1  164.28   30.20
 -23  -1   1  120.19   25.90
 -23  -1   1   40.70   40.80
 -23   1   1  132.89   29.00
  23   1  -1  148.49   25.50
  23   1  -1  147.89   24.50
 -23   1   1  152.88   40.10
 -21  -1   1  218.28   27.00
 -21  -1   1  221.68   41.00
  21  -1  -1  215.88   26.00
  21  -1  -1  265.57   30.80
  21   1  -1  264.97   32.70
  21   1  -1  189.88   27.00
  21   1  -1  234.48   25.50
 -21   1   1  235.08   39.00
 -21   1   1  189.28   29.20
  19  -1  -1  591.64   38.00
  19  -1  -1  559.74   35.10
 -19  -1   1  568.24   50.89
  19  -1  -1  642.44   40.80
 -19  -1   1  656.93   38.20
  19   1  -1  644.44   37.10
 -19   1   1  594.04   47.40
 -19   1   1  613.94   41.70
  19   1  -1  496.95   37.00
  19   1  -1  627.04   34.30
 -17  -1   1  827.42   49.30
 -17  -1   1  839.82   37.50
  17  -1  -1  807.52   39.50
  17  -1  -1  835.72   38.40
  17  -1  -1  850.11   35.30
  17   1  -1  841.22   37.00
 -17   1   1  824.62   47.00
  17   1  -1  831.12   38.10
  17   1  -1  820.72   34.10
 -17   1   1  772.92   39.90
  17   1  -1  805.22   29.00
  15  -1  -1  842.82   35.50
  15  -1  -1  806.72   31.40
 -15  -1   1  822.12   33.90
 -15  -1   1  838.72   44.60
  15  -1  -1  772.32   35.70
  15   1  -1  784.92   30.60
 -15   1   1  836.32   37.20
  15   1  -1  761.82   25.80
  15   1  -1  795.62   32.90
 -15   1   1  779.62   41.50
  15   1  -1  830.42   35.10
  13  -1  -1  475.65   27.30
 -13  -1   1  483.35   24.90
 -13  -1   1  527.35   34.80
  13  -1  -1  523.35   26.80
  13  -1  -1  482.25   23.60
 -13   1   1  468.35   27.90
  13   1  -1  508.55   24.60
 -13   1   1  455.95   31.20
  13   1  -1  472.25   19.30
  13   1  -1  503.05   27.20
  13   1  -1  470.25   22.80
 -11  -1   1  175.08   16.00
  11  -1  -1  178.48   15.40
 -11  -1   1  201.08   24.40
  11  -1  -1  198.68   18.50
  11  -1  -1  183.88   18.70
  11   1  -1  176.08   15.60
 -11   1   1  178.48   19.10
  11   1  -1  158.48   15.00
 -11   1   1  159.18   21.10
  11   1  -1  163.18   12.50
  11   1  -1  181.78   19.30
   9  -1  -1  638.64   20.90
  -9  -1   1  627.64   21.50
   9  -1  -1  643.14   24.80
   9  -1  -1  698.23   23.10
  -9  -1   1  656.33   29.20
  -9   1   1  628.94   27.40
   9   1  -1  644.54   21.40
   9   1  -1  607.74   19.90
   9   1  -1  633.04   18.00
  -9   1   1  655.13   25.30
   9   1  -1  654.83   24.60
   7  -1  -1 2301.17   41.40
  -7  -1   1 2264.87   50.29
  -7  -1   1 2236.68   41.50
   7  -1  -1 2288.37   46.00
   7  -1  -1 2370.66   42.60
   7   1  -1 2241.88   40.20
   7   1  -1 2311.07   41.40
   7   1  -1 2333.87   45.40
   7   1  -1 2323.97   38.90
  -7   1   1 2280.87   49.10
  -7   1   1 2289.17   46.40
   5  -1  -1 8781.02  123.59
  -5  -1   1 8499.65  130.89
   5  -1  -1 9120.99  124.89
   5  -1  -1 8990.60  128.59
  -5  -1   1 8743.03  123.39
   5   1  -1 8940.81  123.29
   5   1  -1 8762.62  123.19
  -5   1   1 8802.12  128.79
   5   1  -1 9158.68  127.99
   5   1  -1 8897.71  122.59
  -5   1   1 9094.19  131.89
   3  -1  -1  120.39    6.80
  -3  -1   1  106.19    8.60
   3  -1  -1  114.99    5.80
   3  -1  -1  121.39    7.60
  -3   1   1  130.19    9.00
   3   1  -1  121.69    6.60
   3   1  -1  123.69    8.30
  -3   1   1  115.49    6.20
   3   1  -1  109.29    5.60
  -3   1   1  116.09    6.30
   3   1  -1  114.49    6.20
  -3   1   1  124.69    8.10
   1  -1  -1   15.90    3.10
   1  -1  -1   10.50    2.00
   1  -1  -1   16.40    3.70
  -1   1   1   14.80    2.60
   1   1  -1   17.10    2.60
  -1   1   1   13.30    2.30
   1   1  -1   13.20    2.30
  -1   1   1   18.30    3.70
   1   1  -1   17.10    2.70
   1   1  -1   20.20    3.20
  -1  -1  -1   52.69    7.10
   1  -1   1   48.20    4.40
  -1   1  -1   49.30    4.40
   1   1   1   48.30    4.60
  -1   1  -1   48.80    4.40
  -1   1  -1   50.29    5.50
   1   1   1   49.50    4.60
   3  -1   1  108.19    7.60
   3  -1   1   98.49    6.80
  -3  -1  -1   92.29   12.90
  -3   1  -1   99.09    7.40
  -3   1  -1   99.19    9.60
   3   1   1   93.69    8.20
   3   1   1   99.29    7.50
  -3   1  -1  105.49    8.90
   3   1   1  100.89    6.00
  -5  -1  -1 1829.92   33.90
  -5  -1  -1 1826.72   43.40
   5  -1   1 1812.62   32.60
   5  -1   1 1740.53   33.30
   5   1   1 1765.02   31.50
  -5   1  -1 1811.22   38.20
   5   1   1 1840.42   33.80
  -5   1  -1 1776.32   33.60
   5   1   1 1797.62   34.70
  -5   1  -1 1783.12   38.20
  -7  -1  -1 2085.99   50.59
  -7  -1  -1 2125.69   41.50
   7  -1   1 2166.68   38.90
   7  -1   1 2063.69   39.90
  -7   1  -1 2053.49   46.90
   7   1   1 2169.78   40.00
  -7   1  -1 2014.80   39.80
  -7   1  -1 2059.19   45.50
   7   1   1 2091.69   38.30
   7   1   1 2152.38   41.40
  -9  -1  -1 1556.04   46.90
   9  -1   1 1518.95   35.00
   9  -1   1 1542.85   32.90
  -9  -1  -1 1554.14   36.90
  -9   1  -1 1532.45   43.50
  -9   1  -1 1486.55   35.00
   9   1   1 1543.35   36.10
   9   1   1 1546.95   34.10
  -9   1  -1 1502.45   40.50
   9   1   1 1517.85   33.50
 -11  -1  -1  756.02   38.20
  11  -1   1  704.43   25.90
  11  -1   1  700.93   22.80
 -11  -1  -1  723.03   27.70
  11   1   1  739.03   27.40
 -11   1  -1  687.53   30.30
  11   1   1  721.33   25.00
 -11   1  -1  678.33   26.30
  11   1   1  723.53   24.30
 -11   1  -1  712.73   34.50
  11   1   1  702.63   26.70
  13  -1   1   27.30   10.60
  13  -1   1   22.80    9.50
  13  -1   1   44.40   12.90
 -13  -1  -1   44.50   19.50
  13  -1   1   17.80   11.90
 -13  -1  -1   26.90   11.00
  13   1   1   39.10   12.00
 -13   1  -1   26.30   16.30
  13   1   1   27.10   10.80
  13   1   1   31.70   10.60
  13   1   1   31.90   11.10
 -13   1  -1   13.40   12.20
  15  -1   1   61.29   15.10
  15  -1   1   57.29   15.60
  15  -1   1   65.79   14.10
  15  -1   1   51.69   12.20
 -15  -1  -1   69.29   15.30
 -15  -1  -1   72.09   23.70
  15   1   1   62.69   13.20
 -15   1  -1   55.99   16.20
  15   1   1   63.39   13.70
 -15   1  -1   63.99   21.50
  15   1   1   56.09   15.40
  15   1   1   62.99   14.50
 -17  -1  -1  344.57   43.30
  17  -1   1  310.27   23.40
  17  -1   1  300.77   32.20
  17  -1   1  306.27   28.10
 -17  -1  -1  324.77   30.90
 -17   1  -1  335.37   31.70
  17   1   1  368.06   24.80
  17   1   1  327.47   26.70
  17   1   1  315.57   30.70
 -17   1  -1  295.77   39.00
  17   1   1  344.37   28.00
 -19  -1  -1  339.47   34.20
 -19  -1  -1  346.67   48.60
  19  -1   1  252.47   29.00
  19  -1   1  376.86   32.70
  19   1   1  341.07   31.60
 -19   1  -1  346.07   36.60
 -19   1  -1  366.46   45.90
  19   1   1  355.96   34.50
  19   1   1  399.26   31.70
 -21  -1  -1  500.35   40.40
 -21  -1  -1  406.16   53.79
  21  -1   1  456.35   43.40
  21  -1   1  439.46   37.40
  21   1   1  409.86   39.20
 -21   1  -1  401.86   42.20
 -21   1  -1  437.46   52.39
  21   1   1  523.05   36.80
  23  -1   1   53.29   23.30
 -23  -1  -1   40.40   24.10
  23  -1   1   20.10   25.50
 -23  -1  -1  -17.00   36.70
  23   1   1   25.00   24.40
 -23   1  -1   -1.10   25.70
 -23   1  -1   29.80   35.60
  23   1   1   28.40   21.20
 -25  -1  -1  -69.39   37.80
  25  -1   1   53.99   29.40
  25  -1   1   19.00   25.20
 -25   1  -1   -5.10   39.70
 -25   1  -1   43.80   28.60
  25   1   1   24.50   22.60
  26  -2  -1   26.50   28.10
 -26  -2   1   -6.90   39.70
  26  -2  -1   61.99   26.30
  26   2  -1   25.20   24.40
 -26   2   1   63.99   31.60
 -26   2   1   30.30   39.70
  24  -2  -1   12.80   25.40
 -24  -2   1  -72.19   33.90
  24  -2  -1    0.90   21.10
 -24   2   1   82.99   27.90
  24   2  -1    3.50   21.40
 -24   2   1  -22.50   33.30
 -22  -2   1  -64.29   30.40
  22  -2  -1   35.30   23.60
 -22  -2   1   40.20   19.60
  22  -2  -1   13.00   20.10
  22   2  -1   11.40   18.80
 -22   2   1   20.70   31.40
 -22   2   1   41.90   24.70
  22   2  -1   16.00   21.40
  22   2  -1   14.20   23.10
  20  -2  -1  341.77   37.60
 -20  -2   1  194.98   38.30
  20  -2  -1  217.38   25.70
 -20  -2   1  276.07   30.50
  20   2  -1  266.17   29.00
  20   2  -1  226.68   27.60
 -20   2   1  252.37   38.20
  20   2  -1  289.67   30.10
 -20   2   1  231.18   29.60
 -18  -2   1 1521.35   67.89
  18  -2  -1 1449.55   50.89
  18  -2  -1 1541.35   55.99
  18  -2  -1 1499.15   48.40
 -18  -2   1 1458.25   47.90
 -18   2   1 1481.75   61.69
  18   2  -1 1429.46   41.70
  18   2  -1 1499.15   45.70
  18   2  -1 1353.96   50.49
  18   2  -1 1516.85   47.20
 -18   2   1 1501.85   56.69
  16  -2  -1  932.31   36.80
  16  -2  -1 1001.80   39.70
 -16  -2   1  967.90   51.99
 -16  -2   1  991.80   36.40
  16  -2  -1  919.81   41.90
 -16   2   1 1001.20   47.60
  16   2  -1  991.40   36.00
  16   2  -1  960.20   32.00
  16   2  -1 1042.70   35.50
  16   2  -1 1007.50   40.20
 -16   2   1  990.00   43.90
  14  -2  -1  772.12   36.20
 -14  -2   1  801.72   44.10
 -14  -2   1  763.02   29.90
  14  -2  -1  839.52   33.60
  14  -2  -1  756.72   31.10
  14   2  -1  793.62   29.10
 -14   2   1  789.22   39.40
  14   2  -1  762.52   33.50
  14   2  -1  756.42   29.10
  14   2  -1  778.12   26.90
 -14   2   1  743.43   36.90
  12  -2  -1  159.08   17.20
 -12  -2   1  188.28   28.40
  12  -2  -1  163.18   17.30
 -12  -2   1  164.68   16.60
  12  -2  -1  160.98   17.90
  12   2  -1  141.09   15.70
  12   2  -1  166.38   15.10
 -12   2   1  146.49   18.00
 -12   2   1  159.08   22.80
  12   2  -1  160.08   17.90
  12   2  -1  164.18   14.50
  10  -2  -1  559.34   22.10
 -10  -2   1  547.35   32.30
  10  -2  -1  527.15   25.60
  10  -2  -1  539.65   21.40
 -10  -2   1  497.25   20.00
  10   2  -1  505.35   20.20
 -10   2   1  513.45   26.10
  10   2  -1  514.95   19.60
 -10   2   1  530.65   28.10
  10   2  -1  515.95   19.60
  10   2  -1  558.84   25.10
  -8  -2   1  806.62   32.70
  -8  -2   1  737.43   21.00
   8  -2  -1  832.22   23.50
   8  -2  -1  808.72   27.60
   8  -2  -1  759.62   22.60
  -8   2   1  757.32   27.50
   8   2  -1  797.42   26.80
  -8   2   1  805.52   29.70
  -8   2   1  803.52   23.40
   8   2  -1  784.82   21.90
   8   2  -1  792.02   22.20
   6  -2  -1 1337.57   27.80
   6  -2  -1 1309.27   28.70
   6  -2  -1 1322.27   32.60
  -6  -2   1 1369.66   37.90
   6   2  -1 1295.57   28.40
  -6   2   1 1388.36   35.40
   6   2  -1 1345.77   32.90
  -6   2   1 1266.17   32.70
   6   2  -1 1305.27   26.90
  -6   2   1 1312.37   27.90
   4  -2  -1 2558.74   43.70
   4  -2  -1 2601.64   46.40
   4  -2  -1 2580.54   40.20
   4  -2  -1 2613.14   41.60
  -4  -2   1 2556.34   50.49
   4   2  -1 2562.84   47.10
   4   2  -1 2608.54   44.80
  -4   2   1 2523.25   46.50
  -4   2   1 2468.45   42.50
  -4   2   1 2561.34   39.60
  -4   2   1 2593.94   49.30
  -4   2   1 2612.64   41.90
   4   2  -1 2527.55   41.40
  -2  -2   1  438.26   16.10
   2  -2  -1  454.45   13.40
   2  -2  -1  453.35   10.90
   2  -2  -1  459.95   16.40
   2  -2  -1  451.15   14.10
  -2   2   1  459.85   16.50
   2   2  -1  445.86   15.10
   2   2  -1  459.55   14.50
  -2   2   1  444.46   13.50
  -2   2   1  436.36   14.00
  -2   2   1  456.85   13.20
  -2   2   1  443.66   11.00
   2   2  -1  441.86   12.40
   0  -2  -1   29.90    7.20
   0  -2   1   39.60    5.80
   0   2  -1   31.00    4.60
   0   2  -1   30.80    5.10
   0   2  -1   39.20    5.00
   0   2   1   44.90    7.80
   0   2  -1   31.50    5.30
   0   2   1   37.00    5.40
   0   2   1   35.70    5.40
  -2  -2  -1  947.11   28.10
   2  -2   1  971.00   21.20
  -2   2  -1  947.11   19.10
  -2   2  -1  898.61   19.90
   2   2   1  953.00   23.30
   2   2   1  961.50   21.60
  -2   2  -1  993.30   20.70
  -2   2  -1  979.00   23.20
   4  -2   1 1015.00   22.80
  -4  -2  -1 1011.20   34.20
   4  -2   1 1011.50   23.40
   4   2   1 1065.29   26.70
  -4   2  -1 1011.90   27.30
  -4   2  -1  986.20   22.90
   4   2   1 1067.89   24.40
  -4   2  -1 1041.40   26.40
  -4   2  -1 1027.00   22.00
   6  -2   1 5377.56   79.99
  -6  -2  -1 5305.77   94.79
   6  -2   1 5208.28   81.59
   6   2   1 5108.39   76.99
  -6   2  -1 5195.88   81.59
  -6   2  -1 5129.99   87.99
   6   2   1 5355.76   85.19
   6   2   1 5209.58   81.79
  -6   2  -1 5197.38   87.19
   8  -2   1 3062.39   55.89
  -8  -2  -1 3028.80   53.49
   8  -2   1 3104.79   53.59
  -8  -2  -1 3120.29   70.19
   8   2   1 3092.29   55.19
   8   2   1 3053.89   51.89
  -8   2  -1 3045.40   56.09
  -8   2  -1 2921.11   61.89
  -8   2  -1 3085.09   62.99
   8   2   1 2997.80   57.89
 -10  -2  -1 1036.90   44.40
  10  -2   1 1050.19   30.40
 -10  -2  -1  983.50   28.90
  10  -2   1 1069.49   28.70
 -10   2  -1 1040.10   37.10
 -10   2  -1 1030.60   30.40
  10   2   1 1035.90   29.50
 -10   2  -1 1079.19   37.10
  10   2   1 1035.50   32.40
  10   2   1 1054.09   29.00
  10   2   1  982.00   27.50
  12  -2   1 1275.57   32.90
 -12  -2  -1 1217.38   34.90
  12  -2   1 1250.67   42.90
  12  -2   1 1206.08   35.60
 -12  -2  -1 1275.27   51.19
 -12   2  -1 1218.98   44.20
 -12   2  -1 1211.98   36.10
  12   2   1 1208.78   33.80
  12   2   1 1202.98   34.80
  12   2   1 1213.28   37.10
  12   2   1 1269.67   33.60
 -12   2  -1 1270.67   43.20
  14  -2   1   33.60   13.10
 -14  -2  -1   28.10   21.80
 -14  -2  -1   23.10   11.70
  14  -2   1   20.90   10.40
  14  -2   1   36.70   14.70
  14   2   1   30.20   12.60
  14   2   1   18.40   11.90
  14   2   1   54.29   13.20
 -14   2  -1   12.70   14.30
 -14   2  -1   53.09   18.90
  14   2   1   51.99   13.60
 -16  -2  -1   27.10   25.80
 -16  -2  -1   46.10   15.00
  16  -2   1   27.40   15.00
  16  -2   1   59.29   18.00
  16  -2   1   46.00   13.20
  16   2   1   54.59   15.30
 -16   2  -1   48.80   22.10
  16   2   1   60.09   14.60
 -16   2  -1   64.49   18.60
  16   2   1   47.30   14.30
  16   2   1   50.19   15.00
  18  -2   1  542.05   40.40
  18  -2   1  523.85   36.00
 -18  -2  -1  533.85   34.20
 -18  -2  -1  539.55   52.59
  18   2   1  552.94   34.50
  18   2   1  621.34   32.40
  18   2   1  492.45   33.10
 -18   2  -1  591.44   40.60
 -18   2  -1  596.54   46.20
  18   2   1  555.34   30.20
 -20  -2  -1   79.29   36.50
  20  -2   1   47.40   21.40
 -20  -2  -1   96.59   20.50
  20  -2   1  117.19   26.60
  20   2   1  114.59   20.90
 -20   2  -1  102.19   32.80
  20   2   1   77.19   20.00
 -20   2  -1   78.59   23.90
  22  -2   1  118.19   29.30
  22  -2   1   80.99   25.50
 -22  -2  -1   16.00   40.40
  22   2   1   89.99   22.70
 -22   2  -1   84.39   36.20
 -22   2  -1  142.99   29.50
 -24  -2  -1  -42.50   38.60
  24  -2   1    9.70   23.10
  24  -2   1    4.80   26.60
 -24   2  -1  -16.20   37.40
 -24   2  -1   10.70   26.70
  24   2   1    5.00   21.10
  26  -2   1   79.59   27.70
  26  -2   1   77.29   31.50
 -26  -2  -1  -20.80   44.10
 -26   2  -1   33.80   43.20
  26   2   1   83.19   25.30
 -26   2  -1   58.29   31.40
  27  -3  -1    7.80   26.00
  27  -3  -1   32.50   30.30
 -27  -3   1  -45.40   40.30
  27   3  -1   18.60   25.00
 -27   3   1  -82.99   37.80
 -27   3   1   40.50   31.10
 -25  -3   1  -43.20   37.90
  25  -3  -1   40.20   24.10
  25  -3  -1    9.60   26.70
 -25   3   1   -4.70   35.80
 -25   3   1   44.30   29.50
  25   3  -1   30.50   22.90
 -23  -3   1  -61.89   34.80
  23  -3  -1   33.40   26.40
  23  -3  -1    3.80   20.30
  23   3  -1   -6.60   20.80
 -23   3   1   35.30   27.30
 -23   3   1   -4.20   31.20
 -21  -3   1  -32.90   30.40
  21  -3  -1   28.40   22.90
  21   3  -1   24.70   19.30
  21   3  -1   57.29   20.90
 -21   3   1   49.60   24.90
 -21   3   1   27.70   29.20
 -19  -3   1   12.70   30.20
  19  -3  -1   52.89   17.80
 -19  -3   1   47.40   16.30
  19  -3  -1   58.39   21.10
  19   3  -1   50.69   15.60
  19   3  -1   78.39   18.10
  19   3  -1   68.89   21.60
 -19   3   1   61.19   25.70
 -19   3   1   40.40   21.70
  19   3  -1   62.29   20.10
  17  -3  -1  128.69   21.90
  17  -3  -1  128.59   22.90
  17  -3  -1  140.29   20.10
 -17  -3   1  150.98   32.90
 -17  -3   1  209.28   23.40
 -17   3   1  151.88   23.40
  17   3  -1  180.28   19.20
 -17   3   1  184.98   28.40
  17   3  -1  151.88   17.20
  17   3  -1  135.69   21.20
  17   3  -1  182.28   21.10
 -15  -3   1  130.09   28.80
  15  -3  -1  109.99   18.60
 -15  -3   1  118.49   14.40
  15  -3  -1   86.69   19.20
  15  -3  -1  107.99   17.10
  15   3  -1  105.79   15.10
 -15   3   1  132.69   23.20
  15   3  -1   84.79   18.00
 -15   3   1  129.39   20.10
  15   3  -1  124.59   15.30
  15   3  -1  151.18   18.00
  13  -3  -1   52.09   12.60
 -13  -3   1   68.89   23.20
  13  -3  -1   79.49   15.20
  13  -3  -1   53.89   14.90
 -13   3   1   67.59   16.20
  13   3  -1   56.99   15.20
 -13   3   1   68.29   18.30
  13   3  -1   61.29   11.70
  13   3  -1   70.79   12.60
  11  -3  -1  318.77   20.20
  11  -3  -1  304.77   21.40
 -11  -3   1  402.96   34.20
  11  -3  -1  323.97   24.40
 -11   3   1  308.57   26.10
 -11   3   1  327.37   25.80
 -11   3   1  306.57   20.60
  11   3  -1  300.87   19.00
  11   3  -1  339.97   24.10
  11   3  -1  332.37   19.40
   9  -3  -1  632.34   27.90
  -9  -3   1  647.64   35.30
   9  -3  -1  685.43   23.30
   9  -3  -1  624.44   22.80
   9   3  -1  574.84   22.70
   9   3  -1  614.44   21.00
   9   3  -1  549.25   26.20
  -9   3   1  628.74   29.40
  -9   3   1  631.64   23.30
  -9   3   1  588.74   28.10
  -7  -3   1  120.09   17.90
   7  -3  -1  107.19   12.40
   7  -3  -1   87.09    9.70
   7  -3  -1   80.99   11.60
  -7   3   1  115.29   10.60
  -7   3   1  109.59   14.50
  -7   3   1  107.09   10.30
  -7   3   1  106.49    9.20
  -7   3   1  103.09   12.60
   7   3  -1  107.39   12.70
   7   3  -1   91.99    9.30
   7   3  -1   91.39   11.00
  -5  -3   1   56.09   14.10
   5  -3  -1   43.10    8.50
   5  -3  -1   64.39    7.60
   5  -3  -1   61.49    7.50
   5  -3  -1   71.79    9.00
   5   3  -1   40.70    7.10
   5   3  -1   43.70    9.40
  -5   3   1   75.29    8.60
  -5   3   1   73.99    9.10
   5   3  -1   43.90    9.00
  -5   3   1   45.80    9.10
  -5   3   1   70.89    8.00
  -5   3   1   63.29   10.90
   3  -3  -1 1151.48   27.30
   3  -3  -1 1174.88   23.50
   3  -3  -1 1189.08   31.40
  -3  -3   1 1108.39   32.90
   3  -3  -1 1170.58   27.80
  -3   3   1 1148.39   23.40
  -3   3   1 1151.18   31.30
  -3   3   1 1179.08   26.00
  -3   3   1 1143.79   26.70
   3   3  -1 1140.99   28.50
   3   3  -1 1193.58   30.50
  -3   3   1 1181.98   28.10
   3   3  -1 1141.79   24.10
  -1  -3   1  400.46   18.50
   1  -3  -1  414.16   19.80
  -1   3   1  417.56   14.30
   1   3  -1  438.16   13.90
   1   3  -1  396.66   16.40
  -1   3   1  426.36   16.20
  -1   3   1  420.86   16.20
   1   3  -1  435.66   17.40
  -1   3   1  404.16   19.50
   1  -3   1  274.97   14.20
  -1  -3  -1  234.68   18.80
  -1   3  -1  273.87   13.60
   1   3   1  267.77   14.30
  -1   3  -1  272.37   13.50
   1   3   1  263.07   14.40
  -1   3  -1  291.97   12.20
  -1   3  -1  272.47   13.10
   3  -3   1  577.94   18.90
  -3  -3  -1  563.84   27.60
  -3   3  -1  595.54   17.90
   3   3   1  584.14   19.50
  -3   3  -1  582.64   17.70
   3   3   1  568.54   21.30
  -3   3  -1  589.84   20.50
  -3   3  -1  576.74   20.90
  -3   3  -1  594.94   16.80
   5  -3   1  327.77   13.60
  -5  -3  -1  284.07   25.00
   5  -3   1  308.27   15.10
   5  -3   1  313.87   14.50
   5   3   1  314.87   18.00
  -5   3  -1  339.07   18.10
  -5   3  -1  320.37   18.80
   5   3   1  299.27   15.70
  -5   3  -1  326.67   14.00
  -5   3  -1  322.37   12.40
  -5   3  -1  309.97   14.80
   7  -3   1  893.51   22.50
  -7  -3  -1  838.82   37.90
   7  -3   1  849.52   25.30
   7  -3   1  814.92   24.10
   7   3   1  849.12   25.90
  -7   3  -1  874.41   29.80
   7   3   1  847.32   28.80
  -7   3  -1  864.61   25.30
   7   3   1  813.42   21.00
  -7   3  -1  822.62   30.30
   9  -3   1  150.18   15.60
   9  -3   1  161.08   14.90
  -9  -3  -1  144.99   23.50
  -9   3  -1  165.18   16.20
   9   3   1  120.99   13.30
   9   3   1  193.28   18.50
  -9   3  -1  138.49   16.70
   9   3   1  149.09   15.70
  -9   3  -1  155.08   19.10
  11  -3   1  123.29   14.60
 -11  -3  -1  109.69   24.20
  11  -3   1  129.99   14.00
  11   3   1  111.39   14.00
  11   3   1   97.29   14.90
 -11   3  -1  149.69   15.90
 -11   3  -1  102.79   16.80
  11   3   1   87.59   11.20
 -11   3  -1  142.39   19.60
  13  -3   1  348.37   21.30
  13  -3   1  300.97   28.30
 -13  -3  -1  359.16   39.30
  13  -3   1  278.07   23.10
 -13  -3  -1  318.57   21.00
 -13   3  -1  334.37   29.10
 -13   3  -1  288.47   29.10
  13   3   1  304.37   21.20
  13   3   1  305.27   22.70
 -13   3  -1  328.17   23.40
  13   3   1  320.77   20.90
 -15  -3  -1   47.80   12.30
  15  -3   1   11.80   14.00
 -15  -3  -1   34.50   27.10
  15  -3   1   34.10   15.80
  15  -3   1   32.40   12.90
  15   3   1   16.20   14.80
  15   3   1   38.00   12.20
 -15   3  -1   66.89   20.30
 -15   3  -1   27.50   16.90
 -15   3  -1   56.59   15.00
  15   3   1   39.50   13.00
  15   3   1   41.10   13.70
 -17  -3  -1  -25.50   29.00
 -17  -3  -1   34.40   13.90
  17  -3   1   18.20   18.40
  17  -3   1   -2.90   15.10
  17   3   1   24.70   14.80
 -17   3  -1   16.70   18.30
 -17   3  -1   47.10   23.90
  17   3   1  -15.20   16.30
  17   3   1   24.30   14.00
  17   3   1   37.60   15.50
  19  -3   1   73.79   23.30
  19  -3   1   51.39   20.10
 -19  -3  -1   73.19   35.10
 -19   3  -1   64.79   23.80
  19   3   1  106.99   22.00
 -19   3  -1  127.39   32.00
  19   3   1  116.59   20.20
  19   3   1  112.49   20.90
  21  -3   1   44.90   22.00
  21  -3   1   27.40   23.40
 -21  -3  -1  -84.59   36.10
  21   3   1   61.89   20.10
 -21   3  -1   31.10   31.30
 -21   3  -1   13.50   23.30
  23  -3   1   30.50   22.60
 -23  -3  -1  -46.80   38.50
  23  -3   1   18.10   26.60
  23   3   1   37.70   21.20
 -23   3  -1   51.39   27.20
 -23   3  -1    6.40   33.70
  25  -3   1    7.50   27.50
 -25  -3  -1  -44.70   42.50
  25  -3   1   26.70   25.40
  25   3   1   30.40   22.90
 -25   3  -1   42.50   41.30
 -25   3  -1   39.30   30.40
 -26  -4   1   -2.00   43.90
  26  -4  -1   90.59   32.40
  26  -4  -1  104.79   28.80
 -26   4   1  111.19   34.80
  26   4  -1  139.49   28.40
 -26   4   1  126.09   43.30
  24  -4  -1   15.30   23.50
  24  -4  -1   19.80   28.10
 -24  -4   1  -27.80   40.60
 -24   4   1   38.90   35.10
 -24   4   1   51.29   29.20
  24   4  -1   23.70   22.10
 -22  -4   1  -23.60   36.10
  22  -4  -1   -1.50   20.80
  22  -4  -1   18.30   25.00
  22   4  -1   59.29   22.40
  22   4  -1   23.70   19.70
 -22   4   1   -8.30   25.60
 -22   4   1   25.10   31.20
  20  -4  -1   79.09   24.70
 -20  -4   1   30.60   35.00
  20  -4  -1   69.69   20.70
  20   4  -1   83.39   19.80
 -20   4   1   68.19   30.10
  20   4  -1   81.29   22.80
 -20   4   1   70.39   25.60
  20   4  -1   65.79   18.90
  18  -4  -1  167.08   25.30
 -18  -4   1  157.28   36.40
  18  -4  -1  133.09   20.80
  18   4  -1  201.38   26.20
  18   4  -1  202.68   21.50
 -18   4   1  165.38   30.00
 -18   4   1  145.29   24.50
  18   4  -1  173.68   20.60
  16  -4  -1  528.45   33.60
  16  -4  -1  585.94   37.80
  16  -4  -1  547.35   31.20
 -16  -4   1  520.95   50.09
 -16   4   1  525.75   39.50
 -16   4   1  581.54   39.00
  16   4  -1  584.34   28.80
  16   4  -1  580.94   29.30
  16   4  -1  565.54   35.10
  14  -4  -1    4.30   13.40
  14  -4  -1   28.90   14.00
 -14  -4   1    0.10   22.60
  14  -4  -1   -2.60   11.60
  14   4  -1   24.80   11.20
 -14   4   1    4.30   11.90
 -14   4   1   -1.30   15.90
  14   4  -1   14.50   14.10
  14   4  -1   25.20   11.70
 -14   4   1   16.80   13.50
 -12  -4   1   18.20   21.70
  12  -4  -1   16.20   11.90
  12  -4  -1   30.60   12.60
  12  -4  -1   16.30   10.80
 -12   4   1   16.70   12.70
  12   4  -1   22.40   10.30
 -12   4   1    8.00   14.70
  12   4  -1   17.50   12.60
  12   4  -1   25.40   10.00
 -12   4   1   42.90   12.10
  10  -4  -1  303.77   20.00
  10  -4  -1  295.37   23.90
 -10  -4   1  322.07   34.60
  10  -4  -1  305.37   20.30
 -10   4   1  349.27   25.80
 -10   4   1  272.77   25.60
  10   4  -1  309.47   19.00
 -10   4   1  295.57   20.50
  10   4  -1  274.57   20.60
  10   4  -1  307.07   23.40
   8  -4  -1 1913.11   48.70
   8  -4  -1 1962.50   42.10
   8  -4  -1 1946.51   39.00
  -8  -4   1 1967.70   57.89
   8  -4  -1 1949.70   44.00
  -8   4   1 1915.01   49.70
  -8   4   1 1943.01   42.40
  -8   4   1 1945.11   37.50
  -8   4   1 1929.01   41.60
  -8   4   1 1867.11   51.39
   8   4  -1 1970.10   40.10
   8   4  -1 1994.80   49.50
   8   4  -1 1907.81   44.70
   6  -4  -1 1421.76   32.40
   6  -4  -1 1420.56   38.10
  -6  -4   1 1485.75   46.40
   6  -4  -1 1479.45   35.40
   6  -4  -1 1455.85   32.60
  -6   4   1 1449.95   39.20
  -6   4   1 1426.46   41.70
   6   4  -1 1434.76   31.70
  -6   4   1 1456.45   34.10
  -6   4   1 1491.65   31.70
  -6   4   1 1428.86   32.60
   6   4  -1 1497.95   40.40
   6   4  -1 1407.06   36.90
   4  -4  -1 1568.04   36.80
   4  -4  -1 1552.84   41.30
   4  -4  -1 1523.75   31.50
   4  -4  -1 1558.64   36.40
  -4  -4   1 1530.85   43.10
  -4   4   1 1581.14   31.70
   4   4  -1 1517.25   31.40
  -4   4   1 1544.55   37.40
   4   4  -1 1615.64   40.20
  -4   4   1 1573.34   34.30
  -4   4   1 1562.54   41.40
   4   4  -1 1578.54   38.30
  -4   4   1 1625.64   35.80
   2  -4  -1  718.23   27.70
   2  -4  -1  764.72   21.80
  -2  -4   1  728.63   27.60
   2   4  -1  734.83   19.60
  -2   4   1  726.33   23.40
  -2   4   1  716.53   22.10
  -2   4   1  763.22   28.20
  -2   4   1  749.73   23.80
   2   4  -1  754.02   25.70
   2   4  -1  750.12   25.00
   0  -4   1  258.47   17.50
   0  -4  -1  243.88   19.10
   0   4   1  268.97   20.40
   0   4   1  242.28   15.70
   0   4  -1  251.47   15.30
   0   4   1  240.78   15.50
   0   4  -1  243.28   15.50
   0   4  -1  268.57   13.10
   0   4  -1  254.87   17.70
   0   4  -1  247.68   13.20
  -2  -4  -1    9.80   11.00
   2  -4   1   28.30    8.40
  -2   4  -1   16.20    7.70
   2   4   1   21.40    8.00
  -2   4  -1   24.20    7.20
  -2   4  -1   14.50    6.70
  -2   4  -1   20.70    6.20
   2   4   1   23.70    7.80
  -2   4  -1   20.40    8.80
  -4  -4  -1  482.05   29.60
   4  -4   1  496.45   19.10
   4  -4   1  481.55   20.10
  -4   4  -1  475.35   18.40
   4   4   1  485.35   20.90
  -4   4  -1  469.75   21.60
   4   4   1  496.65   22.80
  -4   4  -1  480.75   18.20
   6  -4   1  169.18   13.20
   6  -4   1  133.39   12.70
   6  -4   1  176.08   14.30
  -6  -4  -1  170.98   23.40
   6   4   1  143.99   17.90
  -6   4  -1  152.68   15.10
  -6   4  -1  157.48   18.20
  -6   4  -1  157.48   16.90
  -6   4  -1  158.78   13.10
   6   4   1  168.78   16.20
  -8  -4  -1  717.23   42.20
  10  -4   1  311.27   18.30
 -10  -4  -1  328.67   37.40
  10  -4   1  295.77   21.10
  10  -4   1  316.07   19.00
 -10   4  -1  299.67   25.40
 -10   4  -1  314.97   26.70
  10   4   1  321.07   17.80
  10   4   1  339.17   24.50
 -10   4  -1  298.07   20.70
  10   4   1  326.67   21.60
  12  -4   1   94.79   17.10
 -12  -4  -1   94.49   27.10
  12  -4   1  104.89   15.10
  12  -4   1  136.59   15.20
  12   4   1  164.88   17.60
  12   4   1  104.89   14.80
  12   4   1   95.09   16.30
 -12   4  -1  108.59   18.10
 -12   4  -1  130.09   15.70
 -12   4  -1  136.99   20.80
  14  -4   1  231.18   28.20
 -14  -4  -1  140.89   32.10
  14  -4   1  206.08   21.00
  14  -4   1  161.58   18.40
  14   4   1  139.09   19.70
 -14   4  -1  165.28   25.00
  14   4   1  190.78   20.90
 -14   4  -1  125.49   16.80
  14   4   1  172.08   19.30
 -14   4  -1  150.98   22.00
  16  -4   1  466.45   31.60
 -16  -4  -1  402.76   50.39
  16  -4   1  416.06   35.70
  16  -4   1  494.45   37.90
 -16   4  -1  442.76   38.90
 -16   4  -1  440.86   31.20
  16   4   1  523.15   30.90
  16   4   1  526.15   28.70
 -16   4  -1  389.56   36.40
  16   4   1  470.55   34.00
 -18  -4  -1  728.23   63.29
  18  -4   1  704.33   46.60
  18  -4   1  731.43   39.70
  18   4   1  761.72   36.10
  18   4   1  717.23   37.00
 -18   4  -1  721.23   49.40
  18   4   1  686.83   41.00
 -18   4  -1  696.13   45.90
  20  -4   1  542.75   47.30
 -20  -4  -1  498.25   62.49
  20  -4   1  501.55   38.90
  20   4   1  552.94   35.20
 -20   4  -1  501.45   49.00
 -20   4  -1  487.45   45.70
  20   4   1  467.75   35.00
  20   4   1  487.45   38.00
 -22  -4  -1   48.70   44.10
  22  -4   1  125.89   30.90
  22  -4   1   99.99   25.20
  22   4   1  157.48   24.30
 -22   4  -1   79.89   29.70
 -22   4  -1  114.39   37.00
 -24  -4  -1    7.70   44.10
  24  -4   1   67.99   27.10
  24  -4   1   95.19   32.60
  24   4   1   80.39   23.40
 -24   4  -1   30.50   37.20
 -24   4  -1   50.39   32.00
  25  -5  -1   67.19   26.50
  25  -5  -1   16.30   30.00
 -25  -5   1   -5.90   45.40
  25   5  -1   88.09   25.00
 -25   5   1   81.49   34.40
 -25   5   1   37.30   36.60
  23  -5  -1    4.40   23.50
  23  -5  -1  -10.20   26.20
 -23  -5   1  -36.60   40.20
  23   5  -1   66.69   22.40
 -23   5   1    3.60   31.10
  23   5  -1    8.30   22.70
 -23   5   1  -20.40   29.00
  21  -5  -1   42.40   22.10
  21  -5  -1   17.10   24.20
 -21  -5   1   -3.00   37.10
  21   5  -1   69.39   24.20
  21   5  -1   41.30   19.70
 -21   5   1   57.89   28.60
 -21   5   1   16.90   28.80
  19  -5  -1  300.57   32.80
  19  -5  -1  256.17   31.50
 -19  -5   1  274.47   46.70
  19   5  -1  334.57   31.30
  19   5  -1  301.67   29.70
 -19   5   1  356.66   42.00
  19   5  -1  320.87   34.20
 -19   5   1  248.58   37.30
  17  -5  -1  472.45   38.80
 -17  -5   1  434.76   53.39
  17  -5  -1  499.35   32.80
 -17   5   1  484.05   40.40
 -17   5   1  425.46   40.80
  17   5  -1  453.85   29.90
  17   5  -1  432.36   35.20
  17   5  -1  456.65   30.70
  15  -5  -1   75.49   18.40
  15  -5  -1   92.99   19.10
  15  -5  -1   84.49   16.90
 -15  -5   1  115.09   32.20
  15   5  -1   87.79   16.10
 -15   5   1  114.39   22.00
  15   5  -1  140.09   19.70
 -15   5   1   58.89   17.70
 -15   5   1   82.69   24.90
  15   5  -1  118.59   20.20
  13  -5  -1    1.30   12.80
  13  -5  -1   14.20   11.30
 -13  -5   1   10.20   24.20
  13  -5  -1   -0.90   12.70
  13   5  -1  -11.20   11.50
 -13   5   1    6.70   11.60
  13   5  -1    0.40   12.70
 -13   5   1    1.30   13.40
 -13   5   1  -18.30   16.50
  13   5  -1    0.50   11.20
  11  -5  -1   30.10   12.80
  11  -5  -1   40.00   12.30
 -11  -5   1   14.60   22.50
  11  -5  -1   21.90   10.80
  11  -5  -1   -4.10   10.20
 -11   5   1    3.30    8.90
  11   5  -1   17.70   10.50
  11   5  -1   22.30   12.10
  11   5  -1   38.60   13.20
 -11   5   1   38.00   14.40
 -11   5   1   35.20   15.70
 -11   5   1   41.50   12.40
   9  -5  -1  806.62   26.90
   9  -5  -1  854.81   34.80
  -9  -5   1  867.81   45.90
   9  -5  -1  847.62   28.70
   9  -5  -1  932.31   31.40
  -9   5   1  838.62   29.00
  -9   5   1  887.31   28.40
   9   5  -1  882.71   32.20
  -9   5   1  833.52   25.30
  -9   5   1  864.61   36.90
  -9   5   1  920.01   36.80
   9   5  -1  845.62   27.00
   9   5  -1  836.12   35.20
   7  -5  -1 2379.16   48.30
   7  -5  -1 2354.36   47.60
  -7  -5   1 2310.77   65.39
   7  -5  -1 2310.87   54.79
   7  -5  -1 2369.16   51.69
  -7   5   1 2285.37   49.50
   7   5  -1 2284.37   45.50
   7   5  -1 2281.37   56.89
   7   5  -1 2290.27   53.09
  -7   5   1 2371.16   47.80
  -7   5   1 2344.57   46.70
  -7   5   1 2327.97   55.99
  -7   5   1 2294.67   59.29
  -5  -5   1 2932.11   69.39
   5  -5  -1 3032.50   59.79
   5  -5  -1 2930.01   60.19
   5  -5  -1 2912.21   57.09
   5  -5  -1 3011.00   67.09
   5  -5  -1 2940.31   53.39
  -5   5   1 2980.80   58.49
  -5   5   1 2926.21   53.09
   5   5  -1 2921.71   61.69
  -5   5   1 2956.10   66.89
   5   5  -1 2904.91   52.49
   5   5  -1 2982.00   64.69
  -5   5   1 2986.30   56.79
  -5   5   1 2930.51   61.19
   3  -5  -1 2063.29   44.50
  -3  -5   1 2133.89   53.99
   3  -5  -1 2128.19   52.99
  -3   5   1 2003.60   39.00
   3   5  -1 2124.29   50.59
  -3   5   1 2127.69   53.29
   3   5  -1 2045.40   39.80
   3   5  -1 2131.89   49.00
  -3   5   1 2118.69   46.90
  -3   5   1 2086.89   46.00
  -3   5   1 2066.59   45.60
  -1  -5   1  994.20   33.80
   1  -5  -1 1013.80   35.90
  -1   5   1  986.70   36.10
   1   5  -1 1014.70   31.90
   1   5  -1  984.90   25.30
  -1   5   1  991.20   30.70
  -1   5   1 1019.90   31.60
   1   5  -1 1008.50   31.70
  -1  -5  -1  209.68   21.70
   1  -5   1  196.38   18.50
  -1   5  -1  206.38   17.10
   1   5   1  196.98   17.20
   1   5   1  200.28   16.90
  -1   5  -1  180.78   18.40
  -1   5  -1  192.58   15.00
  -1   5  -1  213.58   16.10
  -1   5  -1  220.48   14.50
  -3  -5  -1   59.79   17.40
   3  -5   1   39.70   10.70
   3  -5   1   51.89   11.80
  -3   5  -1   52.69   12.00
  -3   5  -1   60.49    9.40
   3   5   1   45.20   11.20
  -3   5  -1   44.60    9.90
  -3   5  -1   56.39   10.40
   3   5   1   64.09   12.00
  -3   5  -1   53.79    9.80
   5  -5   1   39.40   10.90
  -5  -5  -1   52.09   20.00
   5  -5   1   31.40   11.10
   5  -5   1   18.40    9.30
  -5   5  -1   50.99    9.90
   5   5   1   21.80   10.90
  -5   5  -1   21.90    9.20
  -5   5  -1   40.60    8.60
  -5   5  -1   29.00   10.90
   5   5   1   29.10   11.60
  -5   5  -1   32.00   11.40
  -7  -5  -1 2203.98   67.59
   7  -5   1 2179.58   48.20
   7  -5   1 2208.18   46.90
   7  -5   1 2240.28   48.20
  -7   5  -1 2145.29   44.90
  -7   5  -1 2112.89   47.10
   7   5   1 2172.68   55.69
  -7   5  -1 2183.98   54.79
  -7   5  -1 2187.88   45.80
  -7   5  -1 2144.49   54.69
   7   5   1 2152.48   51.39
  -9  -5  -1  483.35   41.90
   9  -5   1  480.35   24.60
   9  -5   1  498.05   22.40
   9  -5   1  477.45   23.90
  -9   5  -1  496.65   21.80
  -9   5  -1  476.15   19.70
  -9   5  -1  454.95   24.00
  -9   5  -1  495.85   30.50
   9   5   1  487.55   28.70
   9   5   1  471.45   25.60
  -9   5  -1  468.75   29.70
 -11  -5  -1  183.48   33.00
  11  -5   1  162.18   20.40
  11  -5   1  153.68   17.20
  11  -5   1  171.68   18.00
  11  -5   1  197.48   18.00
 -11   5  -1  229.88   20.90
 -11   5  -1  229.98   27.00
  11   5   1  174.38   17.70
  11   5   1  189.18   23.90
  11   5   1  198.88   21.40
 -11   5  -1  193.78   25.70
  13  -5   1   63.49   16.90
  13  -5   1   78.99   14.80
  13  -5   1   52.89   14.00
 -13  -5  -1   54.89   30.20
 -13   5  -1   37.90   21.70
  13   5   1   53.79   15.20
  13   5   1   58.79   12.60
 -13   5  -1   81.29   15.40
 -13   5  -1   78.29   18.90
  13   5   1   64.49   17.30
 -15  -5  -1  363.96   51.89
  15  -5   1  419.86   35.60
  15  -5   1  370.86   29.40
  15  -5   1  384.36   27.70
 -15   5  -1  393.86   38.40
  15   5   1  437.86   26.80
 -15   5  -1  435.56   37.00
 -15   5  -1  417.26   30.40
  15   5   1  409.96   32.60
  15   5   1  404.66   29.70
  17  -5   1  730.63   39.80
 -17  -5  -1  682.43   62.39
  17  -5   1  696.63   46.20
 -17   5  -1  716.63   45.60
 -17   5  -1  719.03   48.60
  17   5   1  774.42   34.10
  17   5   1  708.43   41.40
 -17   5  -1  718.93   40.80
  17   5   1  672.23   37.30
  19  -5   1  632.94   41.70
 -19  -5  -1  564.94   64.59
  19  -5   1  647.04   48.70
  19   5   1  610.74   37.90
  19   5   1  695.63   36.00
  19   5   1  560.34   40.90
 -19   5  -1  588.44   47.60
 -19   5  -1  629.94   48.80
  21  -5   1  307.17   39.50
  21  -5   1  291.87   33.20
 -21  -5  -1  256.57   52.89
 -21   5  -1  342.77   46.70
  21   5   1  305.77   37.20
  21   5   1  312.17   34.90
 -21   5  -1  312.67   39.10
  21   5   1  416.06   34.10
  23  -5   1   76.29   26.60
  23  -5   1   40.30   31.10
 -23  -5  -1   33.50   47.10
 -23   5  -1   55.29   35.10
 -23   5  -1   17.10   30.40
 -24  -6   1  -40.10   45.60
  24  -6  -1    3.60   29.90
  24  -6  -1   47.20   26.90
 -24   6   1   12.40   31.60
  24   6  -1   57.69   28.00
 -24   6   1    0.50   33.70
 -22  -6   1  -57.69   40.00
  22  -6  -1  -12.30   22.60
  22  -6  -1    9.10   27.50
 -22   6   1   -3.40   29.70
  22   6  -1   43.00   21.10
  22   6  -1   20.40   24.90
 -22   6   1  -17.10   28.80
 -20  -6   1  -36.10   38.60
  20  -6  -1   13.70   21.30
  20  -6  -1   16.40   24.60
  20   6  -1   -6.40   19.50
 -20   6   1   -2.10   28.60
 -20   6   1    3.90   27.50
  20   6  -1   21.20   19.20
  20   6  -1   12.20   22.70
 -18  -6   1   38.30   36.60
  18  -6  -1   21.70   21.90
  18  -6  -1   25.50   19.10
 -18   6   1   38.90   27.20
  18   6  -1   25.70   21.10
  18   6  -1   42.80   19.70
  18   6  -1   36.40   17.80
 -18   6   1   40.50   24.60
 -16  -6   1   54.39   35.30
  16  -6  -1   -2.40   17.20
  16  -6  -1   11.00   15.70
  16  -6  -1   -9.10   22.60
  16   6  -1   42.80   18.40
 -16   6   1   10.30   19.10
 -16   6   1  -23.10   18.90
  16   6  -1   10.10   18.70
 -16   6   1   20.70   23.10
  16   6  -1  -14.70   15.30
  14  -6  -1   70.29   16.00
  14  -6  -1   49.40   17.50
 -14  -6   1   79.69   33.10
  14  -6  -1   86.69   19.40
 -14   6   1   92.29   21.20
 -14   6   1   60.69   22.20
  14   6  -1   66.69   15.80
  14   6  -1   58.89   18.50
 -14   6   1   56.19   16.80
  14   6  -1   58.49   17.80
 -12  -6   1   51.69   28.20
  12  -6  -1   19.90   12.80
  12  -6  -1   40.60   15.50
  12  -6  -1   50.09   13.60
  12  -6  -1   43.40   15.80
 -12   6   1   45.10   13.60
  12   6  -1   21.50   13.20
  12   6  -1   30.80   15.60
  12   6  -1   47.80   16.00
 -12   6   1   33.30   18.80
 -12   6   1    8.60   11.50
 -12   6   1   36.30   16.20
  10  -6  -1  215.88   19.40
  10  -6  -1  200.58   21.10
  10  -6  -1  198.78   20.30
 -10  -6   1  267.57   39.50
  10  -6  -1  175.78   20.60
 -10   6   1  177.78   26.70
 -10   6   1  193.08   20.30
  10   6  -1  214.38   23.90
 -10   6   1  205.38   18.30
 -10   6   1  194.48   17.70
 -10   6   1  226.18   27.10
  10   6  -1  196.38   21.00
  10   6  -1  165.98   19.80
   8  -6  -1  197.38   18.50
   8  -6  -1  176.98   19.20
   8  -6  -1  180.98   19.30
  -8  -6   1  171.88   28.00
   8  -6  -1  165.28   18.80
   8   6  -1  154.38   17.90
  -8   6   1  158.98   19.00
  -8   6   1  169.98   17.00
  -8   6   1  169.88   18.40
  -8   6   1  197.48   24.80
   8   6  -1  191.18   18.00
   8   6  -1  208.98   22.60
  -8   6   1  209.38   17.80
   6  -6  -1  951.90   33.50
   6  -6  -1  930.81   34.20
   6  -6  -1  918.51   31.60
  -6  -6   1  991.90   45.60
   6  -6  -1  953.10   38.90
   6  -6  -1  921.81   28.60
  -6   6   1  914.71   28.50
   6   6  -1  901.81   34.70
  -6   6   1  951.50   35.60
  -6   6   1  975.20   32.30
   6   6  -1  925.21   37.20
  -6   6   1  972.00   31.40
  -6   6   1  970.30   39.70
   6   6  -1  943.11   27.60
  -4  -6   1  532.95   35.00
   4  -6  -1  583.34   25.70
   4  -6  -1  525.35   21.30
   4  -6  -1  573.64   31.20
   4  -6  -1  545.15   28.00
  -4   6   1  586.34   25.30
  -4   6   1  567.74   26.80
  -4   6   1  591.34   31.70
   4   6  -1  564.84   21.20
  -4   6   1  584.94   25.80
   4   6  -1  539.45   28.50
  -4   6   1  538.15   21.40
   4   6  -1  578.04   28.30
  -2  -6   1  292.67   26.20
   2  -6  -1  310.07   25.70
   2  -6  -1  312.37   18.20
   2   6  -1  274.57   21.70
   2   6  -1  335.07   17.50
  -2   6   1  312.17   21.10
   2   6  -1  294.27   22.00
  -2   6   1  300.47   19.30
  -2   6   1  345.27   21.80
  -2   6   1  327.67   26.90
   0  -6   1   50.09   14.40
   0  -6  -1   38.10   15.00
   0   6  -1   52.09   15.20
   0   6   1   51.49   16.90
   0   6   1   45.50   12.60
   0   6   1   55.79   12.90
   0   6  -1   55.69   12.20
   0   6  -1   42.20   11.70
   0   6  -1   54.19    9.70
  -2  -6  -1  246.08   27.00
   2  -6   1  223.28   22.60
   2  -6   1  230.28   20.50
  -2   6  -1  242.08   17.20
  -2   6  -1  247.88   19.50
   2   6   1  240.38   20.70
   2   6   1  271.87   21.50
  -2   6  -1  237.88   18.20
  -2   6  -1  226.28   22.80
  -2   6  -1  244.78   20.60
   4  -6   1   11.10   10.40
  -4  -6  -1   -6.30   17.10
   4  -6   1   15.10   12.40
  -4   6  -1   11.80   11.70
   4   6   1   22.40   11.20
   4   6   1    9.80   10.70
  -4   6  -1   14.30    9.90
  -4   6  -1   10.70    9.80
  -4   6  -1    9.30    9.20
  -4   6  -1   17.40    8.90
   6  -6   1   22.20   10.10
   6  -6   1   33.10   11.90
   6  -6   1   28.50   11.40
  -6  -6  -1    0.00   19.70
  -6   6  -1   38.10   12.70
  -6   6  -1   33.40    9.20
  -6   6  -1   27.50   10.20
  -6   6  -1   24.70   12.50
   6   6   1   20.20   11.40
   6   6   1   12.50   11.40
  -6   6  -1   36.70   10.90
   8  -6   1  514.55   25.70
   8  -6   1  505.95   25.30
  -8  -6  -1  507.05   42.80
   8  -6   1  507.95   24.60
  -8   6  -1  503.25   22.40
  -8   6  -1  473.65   24.70
  -8   6  -1  514.15   30.80
  -8   6  -1  500.95   31.40
   8   6   1  477.45   29.50
  -8   6  -1  499.65   23.60
   8   6   1  482.65   28.40
  10  -6   1    2.50   11.00
  10  -6   1    6.70   11.60
  10  -6   1    3.40   13.10
  10  -6   1    9.30   12.90
 -10  -6  -1    1.10   25.70
 -10   6  -1   -8.50   14.60
 -10   6  -1  -30.00   10.70
 -10   6  -1   13.00   11.50
  10   6   1    1.70   12.80
  10   6   1   -1.00   12.90
 -10   6  -1    4.60    8.00
 -10   6  -1    7.90   14.20
 -12  -6  -1   -2.60   30.30
  12  -6   1   29.20   16.40
  12  -6   1   13.70   13.60
  12  -6   1   16.80   14.60
  12  -6   1   12.60   13.30
  12   6   1   -5.10   12.10
 -12   6  -1   48.10   18.50
 -12   6  -1   17.60   13.40
 -12   6  -1  -20.80   17.80
  12   6   1   -1.20   15.00
  12   6   1   14.20   15.50
  14  -6   1  107.79   19.10
  14  -6   1  134.39   22.30
  14  -6   1  110.79   18.90
 -14  -6  -1  112.69   39.40
  14   6   1  134.09   22.70
 -14   6  -1   93.59   22.00
 -14   6  -1  116.89   27.60
  14   6   1  131.59   17.00
  14   6   1  126.99   23.60
 -14   6  -1   94.59   19.10
  16  -6   1   61.29   20.90
 -16  -6  -1   69.69   41.00
  16  -6   1   66.19   20.40
  16   6   1   75.29   17.20
 -16   6  -1   95.49   24.00
 -16   6  -1   24.90   20.30
  16   6   1   54.49   21.50
  16   6   1   31.70   19.40
 -16   6  -1   61.69   26.80
  18  -6   1   28.60   21.00
 -18  -6  -1   22.90   39.80
  18  -6   1   52.49   23.60
  18   6   1   55.89   23.30
 -18   6  -1   62.49   27.90
 -18   6  -1   40.60   25.00
 -18   6  -1   41.70   23.20
  18   6   1   44.50   21.00
  20  -6   1  105.59   30.20
  20  -6   1   66.49   24.80
 -20  -6  -1   65.29   47.00
  20   6   1   90.09   25.80
 -20   6  -1   83.79   32.90
 -20   6  -1   66.89   29.90
  20   6   1   48.20   22.50
  22  -6   1   66.29   27.70
 -22  -6  -1   31.80   48.20
  22  -6   1   27.40   29.10
 -22   6  -1   62.59   33.70
 -22   6  -1   38.00   34.60
  24  -6   1   17.30   26.20
  24  -6   1   23.30   30.80
 -24  -6  -1  -61.79   46.40
 -24   6  -1  -21.00   32.50
 -24   6  -1   26.50   35.90
  23  -7  -1    5.00   24.50
  23  -7  -1   12.30   28.60
 -23  -7   1  -69.99   44.70
  23   7  -1   41.70   29.10
 -23   7   1   36.00   33.40
 -23   7   1   42.10   30.60
  21  -7  -1   49.99   24.60
  21  -7  -1   59.69   28.90
 -21  -7   1   24.00   47.40
  21   7  -1   59.99   23.40
  21   7  -1   74.29   27.80
 -21   7   1   94.79   32.30
 -21   7   1   42.20   31.10
  19  -7  -1   97.39   29.40
  19  -7  -1  141.79   26.40
 -19  -7   1   78.49   45.00
  19   7  -1  106.99   24.10
  19   7  -1  115.29   26.00
  19   7  -1  115.19   28.30
 -19   7   1  108.79   31.90
 -19   7   1  158.58   33.80
  17  -7  -1   97.29   21.70
  17  -7  -1   57.79   24.10
 -17  -7   1  106.09   43.30
  17   7  -1  118.99   26.40
 -17   7   1   91.19   27.90
  17   7  -1   77.09   20.00
 -17   7   1  119.29   28.70
  17   7  -1  101.69   23.90
 -17   7   1  104.99   24.60
  15  -7  -1  396.66   40.10
 -15  -7   1  303.77   46.80
  15  -7  -1  351.36   32.20
  15  -7  -1  462.15   32.50
 -15   7   1  417.46   40.20
 -15   7   1  411.76   34.10
  15   7  -1  346.57   33.80
  15   7  -1  374.06   31.30
  15   7  -1  437.36   37.60
 -15   7   1  439.36   42.70
  13  -7  -1  179.98   20.80
  13  -7  -1  107.09   21.50
  13  -7  -1  174.18   24.10
  13  -7  -1  156.68   21.90
 -13  -7   1  160.28   38.70
 -13   7   1  234.98   33.60
  13   7  -1  161.58   23.90
  13   7  -1  142.29   19.20
  13   7  -1  140.29   22.70
 -13   7   1  231.58   26.60
 -13   7   1  212.48   22.30
 -13   7   1  192.78   26.50
  11  -7  -1   37.60   18.00
  11  -7  -1  111.49   19.10
 -11  -7   1  133.69   32.40
  11  -7  -1  109.59   17.10
  11  -7  -1   84.39   19.10
 -11   7   1   93.89   17.80
  11   7  -1   88.39   18.70
  11   7  -1  113.39   16.30
  11   7  -1   85.89   19.30
 -11   7   1   57.69   16.20
 -11   7   1  107.39   21.30
 -11   7   1   92.49   15.80
 -11   7   1  116.39   23.50
   9  -7  -1   68.99   16.50
  -9  -7   1  101.69   29.90
   9  -7  -1   82.79   16.90
   9  -7  -1   60.69   16.20
   9  -7  -1   58.89   15.10
  -9   7   1   64.19   15.60
  -9   7   1   78.99   14.30
  -9   7   1   81.09   15.10
  -9   7   1   80.49   18.00
   9   7  -1   78.39   18.50
   9   7  -1   75.29   16.30
  -9   7   1   86.39   20.40
   7  -7  -1   59.19   15.70
   7  -7  -1   84.59   15.60
   7  -7  -1   66.99   15.00
   7  -7  -1   74.59   20.00
  -7  -7   1   65.19   25.80
   7  -7  -1   44.60   13.70
  -7   7   1   56.99   19.30
   7   7  -1   75.69   17.30
   7   7  -1   61.59   12.00
  -7   7   1   99.49   17.40
  -7   7   1   26.20   13.30
  -7   7   1   86.99   14.10
   7   7  -1   86.29   15.80
  -7   7   1   96.99   14.70
  -5  -7   1  178.78   26.20
   5  -7  -1  207.18   20.90
   5  -7  -1  164.08   19.10
   5  -7  -1  168.58   18.00
   5  -7  -1  216.48   26.10
   5   7  -1  208.48   22.30
  -5   7   1  203.28   25.90
   5   7  -1  208.88   17.20
  -5   7   1  216.98   19.90
  -5   7   1  187.88   22.30
   5   7  -1  180.68   22.40
  -5   7   1  208.98   21.30
  -5   7   1  213.18   18.00
   3  -7  -1   15.60    8.80
   3  -7  -1   11.30   14.60
  -3  -7   1    7.70   16.70
   3   7  -1   20.00   11.20
   3   7  -1   22.10    9.70
  -3   7   1   11.40    9.80
  -3   7   1   11.20   14.40
  -3   7   1   18.10   10.20
  -3   7   1   10.30    8.10
   3   7  -1   -1.30   10.10
  -3   7   1   15.30   11.70
  -1  -7   1  110.29   19.50
   1  -7  -1  132.89   20.80
   1   7  -1  116.39   13.00
   1   7  -1  108.69   16.20
   1   7  -1  112.29   16.70
  -1   7   1  117.39   16.50
  -1   7   1  128.19   17.00
  -1   7   1  134.59   22.30
  -1  -7  -1  151.08   23.20
   1  -7   1  161.48   22.70
   1   7   1  131.79   17.60
  -1   7  -1  144.89   16.50
  -1   7  -1  174.68   17.10
   1   7   1  129.19   17.70
  -1   7  -1  131.89   17.00
  -1   7  -1  166.78   22.20
  -1   7  -1  136.69   17.90
  -3  -7  -1    8.00   18.30
   3  -7   1   11.80   13.70
   3  -7   1   -1.80   11.30
   3   7   1   14.40   11.40
  -3   7  -1   11.00   10.50
  -3   7  -1    9.70    9.80
  -3   7  -1   22.00   13.80
  -3   7  -1   -5.00   10.80
   3   7   1    2.90   11.10
  -3   7  -1    9.10    9.90
  -5  -7  -1 1521.65   59.09
   5  -7   1 1463.75   44.50
   5  -7   1 1477.15   43.90
   5  -7   1 1529.55   41.00
   5  -7   1 1560.24   49.40
   5   7   1 1504.55   46.40
  -5   7  -1 1518.15   42.90
  -5   7  -1 1508.25   48.90
  -5   7  -1 1499.35   45.40
  -5   7  -1 1492.15   43.50
   5   7   1 1433.26   48.80
  -5   7  -1 1488.45   40.10
   7  -7   1  257.07   22.70
  -7  -7  -1  233.38   33.80
   7  -7   1  293.97   27.10
   7  -7   1  269.37   23.40
   7  -7   1  206.98   29.80
   7  -7   1  351.66   25.70
  -7   7  -1  268.97   23.00
   7   7   1  302.87   27.50
  -7   7  -1  193.08   28.60
  -7   7  -1  297.57   23.60
   7   7   1  258.77   26.30
  -7   7  -1  259.67   28.70
   9  -7   1  384.96   27.20
   9  -7   1  315.27   24.90
   9  -7   1  347.37   26.70
  -9  -7  -1  312.67   46.70
   9  -7   1  381.96   31.30
   9   7   1  310.77   30.30
  -9   7  -1  317.87   32.70
  -9   7  -1  335.17   22.30
   9   7   1  338.87   29.00
  -9   7  -1  343.77   25.00
  -9   7  -1  326.87   26.40
  11  -7   1   81.79   17.40
  11  -7   1   55.99   18.80
 -11  -7  -1   97.99   36.10
  11  -7   1   86.49   17.60
 -11   7  -1   85.99   16.90
 -11   7  -1   61.19   17.00
  11   7   1   88.89   19.80
 -11   7  -1  112.79   24.10
 -11   7  -1   81.49   14.10
 -11   7  -1   90.49   20.90
  11   7   1   84.29   20.50
  13  -7   1   64.99   20.30
  13  -7   1   72.69   19.60
 -13  -7  -1   90.69   39.00
  13  -7   1   50.59   17.80
  13   7   1   71.09   21.70
 -13   7  -1   77.19   19.50
 -13   7  -1   76.29   22.90
 -13   7  -1   91.19   23.30
  13   7   1   80.69   21.00
 -15  -7  -1   21.80   39.90
  15  -7   1   45.10   19.20
  15  -7   1   35.40   21.30
 -15   7  -1   38.80   23.10
  15   7   1   46.80   21.70
 -15   7  -1   43.10   19.70
  15   7   1   29.60   19.90
 -15   7  -1   69.99   24.40
  17  -7   1   39.90   23.80
  17  -7   1   92.69   22.60
 -17  -7  -1   -0.20   42.10
  17   7   1  112.59   25.50
  17   7   1   70.09   23.10
 -17   7  -1  106.69   27.80
 -17   7  -1   96.69   28.40
 -17   7  -1   94.29   23.80
  19  -7   1   18.50   22.80
  19  -7   1   39.20   27.00
 -19  -7  -1   38.10   45.90
 -19   7  -1   28.90   24.80
 -19   7  -1   46.80   29.10
  19   7   1   40.20   22.70
 -19   7  -1   61.59   28.90
  19   7   1   72.59   25.30
  21  -7   1   26.60   27.70
 -21  -7  -1  -13.10   47.70
  21  -7   1   35.80   27.30
  21   7   1   32.70   23.40
  21   7   1   53.69   27.60
 -21   7  -1   31.20   30.90
 -21   7  -1   44.60   29.40
 -23  -7  -1  -67.39   47.50
  23  -7   1   -8.20   26.20
  23  -7   1    6.50   29.30
 -23   7  -1  -17.10   53.19
 -23   7  -1   40.20   33.50
  22  -8  -1   11.40   24.90
  22  -8  -1   77.59   31.20
 -22  -8   1  -47.50   46.80
  22   8  -1   50.39   29.30
 -22   8   1   19.10   31.70
 -22   8   1   52.19   33.20
  22   8  -1   31.10   38.90
  20  -8  -1  154.98   32.40
  20  -8  -1  165.18   29.20
 -20  -8   1  108.59   51.49
 -20   8   1  184.78   36.30
  20   8  -1  165.78   29.40
 -20   8   1  159.88   35.90
  20   8  -1  161.28   33.40
  18  -8  -1  383.86   46.30
  18  -8  -1  303.37   32.60
 -18  -8   1  248.18   52.99
 -18   8   1  390.86   40.50
 -18   8   1  321.17   40.30
  18   8  -1  351.66   41.80
  18   8  -1  400.76   37.90
 -18   8   1  430.56   46.50
 -16  -8   1  265.87   50.59
  16  -8  -1  391.76   43.90
  16  -8  -1  267.27   28.30
  16   8  -1  359.46   40.40
 -16   8   1  392.06   42.60
 -16   8   1  384.86   46.20
 -16   8   1  383.96   35.30
  16   8  -1  357.66   36.10
  14  -8  -1  342.17   31.30
 -14  -8   1  251.17   47.40
  14  -8  -1  200.58   28.90
  14  -8  -1  305.07   30.70
  14   8  -1  225.88   29.00
  14   8  -1  251.67   31.80
 -14   8   1  346.17   31.80
  14   8  -1  362.26   30.50
 -14   8   1  216.18   31.90
 -14   8   1  352.86   38.80
  12  -8  -1   49.80   18.80
 -12  -8   1   43.50   37.70
  12  -8  -1   52.39   17.30
  12  -8  -1    6.00   19.30
  12  -8  -1    4.70   17.90
 -12   8   1   61.39   15.90
 -12   8   1   51.09   18.10
  12   8  -1   39.90   20.00
  12   8  -1   54.19   16.30
 -12   8   1   34.40   21.70
 -12   8   1   28.50   16.30
  12   8  -1   27.60   19.90
 -12   8   1   78.49   23.10
  10  -8  -1  -19.60   16.90
  10  -8  -1   36.50   17.30
  10  -8  -1   23.10   22.40
 -10  -8   1   13.80   31.20
  10  -8  -1   35.90   17.20
  10  -8  -1    9.90   14.30
 -10   8   1  -18.50   14.70
  10   8  -1   31.10   16.00
  10   8  -1   21.70   13.80
 -10   8   1    4.80   16.60
 -10   8   1   32.10   14.80
 -10   8   1    6.10   14.20
  10   8  -1   31.80   17.40
 -10   8   1   28.60   20.70
  -8  -8   1  278.57   38.90
   8  -8  -1  303.77   36.20
   8  -8  -1  333.77   29.40
   8  -8  -1  346.07   30.20
   8  -8  -1  411.06   30.90
   8  -8  -1  360.96   26.20
   8   8  -1  404.46   30.20
   8   8  -1  368.36   31.60
  -8   8   1  365.36   26.20
  -8   8   1  362.66   28.10
  -8   8   1  316.27   27.80
  -8   8   1  307.37   35.90
   6  -8  -1  340.67   36.20
   6  -8  -1  334.47   28.50
  -6  -8   1  305.67   40.10
   6  -8  -1  357.56   24.90
   6  -8  -1  359.86   29.00
   6  -8  -1  444.16   28.70
  -6   8   1  328.77   35.50
   6   8  -1  349.67   29.60
  -6   8   1  374.66   27.40
  -6   8   1  367.16   24.30
  -6   8   1  348.57   28.60
   6   8  -1  436.36   30.10
  -6   8   1  391.46   30.00
   4  -8  -1  497.65   33.20
   4  -8  -1  611.74   38.40
  -4  -8   1  580.44   41.50
   4  -8  -1  539.55   25.80
   4  -8  -1  583.84   28.50
  -4   8   1  570.84   25.90
  -4   8   1  582.94   30.70
   4   8  -1  552.14   31.30
  -4   8   1  591.24   30.20
  -4   8   1  595.64   32.40
   4   8  -1  585.44   33.70
   4   8  -1  589.04   26.40
  -4   8   1  582.84   39.70
  -2  -8   1  224.28   30.60
   2  -8  -1  216.68   29.50
   2   8  -1  245.88   24.70
  -2   8   1  237.98   32.60
   2   8  -1  219.18   20.40
   2   8  -1  229.48   23.80
  -2   8   1  264.77   24.80
  -2   8   1  226.38   23.40
   0  -8   1   50.89   18.40
   0  -8  -1   30.60   18.80
   0   8   1   36.20   13.90
   0   8  -1   43.20   14.00
   0   8   1   31.00   12.80
   0   8  -1   35.70   13.80
   0   8  -1   36.10   11.70
   2  -8   1   37.50   14.30
  -2  -8  -1   27.60   21.10
   2  -8   1   58.49   18.00
   2  -8   1   37.80   10.90
   2   8   1   38.90   14.60
  -2   8  -1   21.80   13.90
  -2   8  -1   33.40   12.90
   2   8   1   26.60   14.80
  -2   8  -1   11.90   18.10
  -2   8  -1   23.30   12.40
  -2   8  -1   29.60   12.40
   4  -8   1  741.83   39.00
   4  -8   1  696.03   34.70
  -4  -8  -1  638.44   46.90
   4  -8   1  699.23   31.80
  -4   8  -1  759.12   34.30
   4   8   1  658.93   36.90
  -4   8  -1  706.53   39.80
  -4   8  -1  686.03   30.70
   4   8   1  701.73   35.70
  -4   8  -1  691.03   33.70
  -4   8  -1  736.23   33.10
   6  -8   1  801.02   36.20
   6  -8   1  865.81   35.50
   6  -8   1  858.61   37.40
  -6  -8  -1  845.72   53.69
   6  -8   1  885.61   39.20
   6  -8   1  835.82   44.10
  -6   8  -1  832.42   34.60
   6   8   1  896.51   39.80
  -6   8  -1  858.61   43.50
   6   8   1  813.72   41.60
  -6   8  -1  881.41   35.50
  -6   8  -1  901.61   37.00
  -6   8  -1  889.61   40.00
   8  -8   1  722.73   36.90
   8  -8   1  765.82   38.30
   8  -8   1  685.23   35.70
   8  -8   1  653.33   42.40
   8  -8   1  692.03   34.70
  -8  -8  -1  632.94   55.39
   8   8   1  641.84   38.60
  -8   8  -1  625.94   41.50
  -8   8  -1  753.92   35.00
  -8   8  -1  715.83   33.60
  -8   8  -1  764.02   39.70
   8   8   1  709.33   38.20
  -8   8  -1  710.43   34.20
  10  -8   1  169.38   23.90
 -10  -8  -1  151.18   41.20
  10  -8   1  150.48   20.80
  10  -8   1  202.58   23.90
  10  -8   1  186.48   22.40
 -10   8  -1  223.48   32.60
 -10   8  -1  187.88   21.80
 -10   8  -1  197.98   22.20
  10   8   1  168.08   24.70
  10   8   1  179.08   23.80
 -10   8  -1  205.28   22.90
 -10   8  -1  210.78   26.30
 -12  -8  -1   85.39   40.20
  12  -8   1   61.29   22.00
  12  -8   1   31.20   20.00
  12  -8   1   71.69   19.20
 -12   8  -1   39.50   18.70
 -12   8  -1   34.60   22.00
 -12   8  -1   88.89   23.20
 -12   8  -1   98.99   18.10
  12   8   1   62.89   22.00
  12   8   1   61.49   20.50
  14  -8   1  -14.10   21.00
 -14  -8  -1    8.90   39.30
  14  -8   1   21.00   19.20
 -14   8  -1   -5.40   22.50
 -14   8  -1   22.60   20.00
 -14   8  -1   40.80   22.90
  14   8   1    5.70   20.60
  14   8   1   17.80   20.00
 -16  -8  -1  103.99   48.70
  16  -8   1   90.49   27.40
  16  -8   1  114.39   24.00
  16   8   1  133.29   25.60
 -16   8  -1  144.09   25.50
 -16   8  -1  150.18   30.40
 -16   8  -1  120.79   30.50
  16   8   1  106.89   27.10
 -18  -8  -1   55.09   50.49
  18  -8   1  135.69   31.10
  18  -8   1  162.28   28.60
  18   8   1  149.79   30.80
  18   8   1  139.19   27.80
 -18   8  -1  181.78   29.80
 -18   8  -1  143.39   31.50
 -18   8  -1  175.58   33.00
  20  -8   1  123.29   32.80
  20  -8   1  159.38   31.90
 -20  -8  -1   76.79   51.89
  20   8   1  144.49   31.80
 -20   8  -1  199.38   34.00
  20   8   1  129.39   28.80
 -20   8  -1  203.48   36.80
  22  -8   1   14.60   25.80
  22  -8   1   17.70   30.80
 -22  -8  -1  -59.39   51.39
  22   8   1   11.70   26.80
 -22   8  -1   46.40   33.70
  22   8   1   30.50   28.60
  21  -9  -1   14.70   25.20
  21  -9  -1   23.20   29.50
 -21  -9   1  -80.29   47.30
 -21   9   1   70.09   36.30
 -21   9   1  135.19   36.60
  21   9  -1   41.60   29.30
  21   9  -1   25.70   26.30
 -19  -9   1  -31.40   47.00
  19  -9  -1   91.49   27.00
  19  -9  -1   62.99   30.20
  19   9  -1   82.29   29.40
 -19   9   1  106.49   34.30
 -19   9   1   34.00   28.60
 -19   9   1   63.69   33.00
  19   9  -1   92.79   27.80
  17  -9  -1   86.29   25.30
 -17  -9   1  -23.40   44.40
  17  -9  -1   95.69   28.40
  17   9  -1   86.69   28.70
  17   9  -1  111.09   26.00
 -17   9   1  103.09   30.60
 -17   9   1  114.29   31.10
 -17   9   1   87.49   26.90
  15  -9  -1   97.29   23.50
  15  -9  -1   89.19   26.00
 -15  -9   1   17.40   44.60
  15   9  -1   35.00   25.50
 -15   9   1   93.89   28.70
 -15   9   1   64.89   23.40
 -15   9   1  114.09   29.10
  15   9  -1  114.59   25.40
  13  -9  -1  -25.20   19.90
 -13  -9   1  -58.69   37.20
  13  -9  -1   27.80   26.80
  13  -9  -1   -6.20   18.90
  13  -9  -1  -12.60   18.10
 -13   9   1  -25.10   22.70
 -13   9   1   32.70   23.30
 -13   9   1    9.60   15.80
 -13   9   1   10.00   19.00
  13   9  -1   29.90   21.10
  13   9  -1    6.20   22.50
  11  -9  -1  -25.20   17.30
  11  -9  -1   -0.70   17.50
  11  -9  -1   -3.60   17.40
 -11  -9   1  -12.30   34.90
  11  -9  -1  -30.50   16.10
  11  -9  -1    1.50   22.90
 -11   9   1  -31.60   19.00
  11   9  -1   -7.50   18.50
  11   9  -1  -14.90   17.50
 -11   9   1  -29.50   14.50
 -11   9   1   -1.40   21.30
 -11   9   1   13.40   15.00
 -11   9   1   -2.60   15.80
   9  -9  -1   41.40   19.60
   9  -9  -1   53.89   24.10
   9  -9  -1   49.70   19.70
   9  -9  -1   18.20   17.40
  -9  -9   1   49.10   33.70
   9  -9  -1   66.89   17.00
  -9   9   1   55.49   17.60
   9   9  -1   40.20   19.70
  -9   9   1   57.59   18.20
  -9   9   1   61.49   16.50
   9   9  -1   32.00   18.90
  -9   9   1   40.60   19.80
  -9   9   1   69.39   23.70
   7  -9  -1   55.49   16.40
   7  -9  -1   50.09   14.40
  -7  -9   1   58.89   29.30
   7  -9  -1   12.70   23.60
   7  -9  -1   36.80   19.70
   7  -9  -1   58.39   20.70
  -7   9   1   41.40   23.60
  -7   9   1   28.00   17.50
   7   9  -1   57.29   19.20
   7   9  -1   33.40   17.20
  -7   9   1   34.10   17.20
  -7   9   1   53.39   14.70
  -7   9   1   43.30   17.30
   5  -9  -1   89.79   15.10
   5  -9  -1   61.19   18.80
   5  -9  -1   61.69   14.90
   5  -9  -1  108.69   20.70
  -5  -9   1   79.09   26.60
   5  -9  -1   47.30   24.00
   5   9  -1   65.19   17.20
  -5   9   1   69.89   18.80
   5   9  -1   36.00   14.50
  -5   9   1   64.89   16.30
   5   9  -1   76.69   19.50
  -5   9   1   84.89   14.00
  -5   9   1   71.69   20.00
  -5   9   1   64.79   25.50
   3  -9  -1  239.38   22.90
   3  -9  -1  202.98   30.30
  -3  -9   1  197.88   30.30
   3   9  -1  150.58   20.30
  -3   9   1  211.68   31.90
  -3   9   1  249.38   25.30
  -3   9   1  181.58   23.70
   3   9  -1  225.38   24.00
   3   9  -1  222.58   27.80
  -3   9   1  270.17   28.50
   1  -9  -1  106.79   26.00
  -1  -9   1  126.19   25.20
   1   9  -1  122.39   20.90
  -1   9   1  128.29   21.00
   1   9  -1   96.49   18.10
   1   9  -1  104.09   16.40
  -1   9   1  103.99   19.90
   1  -9   1  189.48   24.10
   1  -9   1  150.28   25.90
  -1  -9  -1  116.79   27.60
   1   9   1  127.99   23.10
  -1   9  -1   84.19   19.50
  -1   9  -1  136.39   21.30
  -1   9  -1  137.09   17.60
   1   9   1   91.29   19.70
   3  -9   1  125.19   16.90
  -3  -9  -1  136.39   30.60
   3  -9   1  178.38   23.40
   3  -9   1  216.98   32.80
  -3   9  -1  136.39   21.10
  -3   9  -1  108.69   26.10
  -3   9  -1  138.79   20.60
  -3   9  -1  118.79   18.20
   3   9   1  134.09   22.40
   3   9   1  131.19   22.60
  -3   9  -1  139.49   18.40
   5  -9   1  166.98   28.00
   5  -9   1  155.08   23.10
   5  -9   1  171.88   24.30
   5  -9   1  176.58   20.20
   5  -9   1  250.37   27.00
  -5  -9  -1  175.18   34.30
  -5   9  -1  187.58   23.20
  -5   9  -1  166.28   20.40
  -5   9  -1  207.28   26.10
   5   9   1  173.68   24.80
  -5   9  -1  172.08   19.70
   5   9   1  169.78   22.90
  -5   9  -1  129.59   27.70
   7  -9   1  160.18   20.10
   7  -9   1  128.09   19.90
   7  -9   1  151.58   28.50
   7  -9   1  103.59   23.20
  -7  -9  -1  152.18   35.50
   7  -9   1  148.59   22.60
  -7   9  -1  186.18   20.80
  -7   9  -1  118.29   20.00
  -7   9  -1  152.48   21.40
   7   9   1  148.19   23.30
  -7   9  -1  108.39   21.20
  -7   9  -1  148.69   26.80
   7   9   1  140.29   24.40
   9  -9   1  125.09   22.70
  -9  -9  -1  173.18   40.70
   9  -9   1  133.39   20.80
   9  -9   1  146.69   22.50
   9  -9   1   83.19   23.40
   9  -9   1  162.28   28.80
  -9   9  -1  162.38   22.40
  -9   9  -1  125.89   22.40
  -9   9  -1  130.49   26.70
   9   9   1  151.48   24.10
   9   9   1  127.49   24.30
  -9   9  -1  111.09   19.40
  -9   9  -1  109.29   20.80
  11  -9   1    0.80   18.90
  11  -9   1  -20.30   17.70
  11  -9   1    0.00   23.30
 -11  -9  -1  -27.10   35.10
  11  -9   1   10.20   17.80
 -11   9  -1  -14.80   17.10
  11   9   1   -4.70   19.70
 -11   9  -1   -1.20   20.40
  11   9   1  -13.80   18.40
 -11   9  -1   10.50   20.00
 -11   9  -1    0.40   15.60
  13  -9   1  -14.80   24.40
  13  -9   1    9.60   22.20
  13  -9   1  -28.80   18.40
 -13  -9  -1  -63.69   38.70
 -13   9  -1   18.20   22.90
  13   9   1   13.10   20.80
  13   9   1    2.80   22.10
 -13   9  -1   22.20   22.20
 -13   9  -1    0.20   19.10
  15  -9   1    4.90   22.10
  15  -9   1   35.40   25.00
 -15  -9  -1   16.80   46.10
 -15   9  -1   63.09   32.40
  15   9   1   -1.70   24.20
  15   9   1   44.10   22.40
 -15   9  -1    6.30   22.70
 -15   9  -1   35.10   26.20
  17  -9   1   77.99   26.10
 -17  -9  -1    4.90   50.49
  17  -9   1  110.79   30.40
 -17   9  -1   77.59   27.60
  17   9   1   66.09   25.20
 -17   9  -1   98.09   31.30
  17   9   1   37.00   26.60
  19  -9   1    5.40   27.50
  19  -9   1   43.20   26.50
 -19  -9  -1  -63.29   49.99
 -19   9  -1   -8.20   27.20
 -19   9  -1    6.60   30.00
  19   9   1   29.50   26.70
  19   9   1   43.90   28.10
 -20 -10   1  -25.70   51.39
  20 -10  -1   27.30   26.40
  20 -10  -1   66.19   31.30
  20  10  -1   27.90   27.60
 -20  10   1   39.70   34.50
  20  10  -1   46.50   31.30
 -18 -10   1  -43.90   46.90
  18 -10  -1   27.30   24.40
  18 -10  -1   45.90   28.40
  18  10  -1   65.99   29.60
 -18  10   1   57.99   30.60
  18  10  -1   15.60   25.10
 -18  10   1    6.90   28.10
 -18  10   1   -4.50   29.30
  16 -10  -1   36.30   33.10
 -16 -10   1  -72.69   44.10
  16 -10  -1   41.20   25.40
  16 -10  -1    6.50   21.80
  16  10  -1   19.20   23.90
 -16  10   1   46.10   28.80
 -16  10   1    8.20   22.80
  16  10  -1    7.60   25.10
 -16  10   1   68.29   29.30
  14 -10  -1   15.60   22.40
 -14 -10   1  -52.79   40.30
  14 -10  -1   12.30   27.90
  14 -10  -1   25.60   20.30
 -14  10   1    8.10   25.40
 -14  10   1   -6.90   19.30
 -14  10   1   44.40   25.20
  14  10  -1    3.00   21.30
  14  10  -1   -5.00   23.50
  12 -10  -1   17.00   19.40
 -12 -10   1   -8.80   38.70
  12 -10  -1   -3.50   27.20
  12 -10  -1    7.50   19.00
  12 -10  -1    9.50   21.00
 -12  10   1    5.30   25.30
 -12  10   1   -3.10   16.70
  12  10  -1   21.60   21.60
  12  10  -1    7.10   21.90
 -12  10   1   30.50   22.70
 -12  10   1    2.90   18.80
  10 -10  -1    6.20   21.00
  10 -10  -1  -44.80   25.80
 -10 -10   1    4.80   37.00
  10 -10  -1   -0.70   17.40
  10 -10  -1  -13.30   17.00
  10 -10  -1    0.70   18.90
  10  10  -1  -21.50   19.40
 -10  10   1    1.90   19.10
 -10  10   1    9.30   16.70
 -10  10   1  -13.40   16.20
  10  10  -1    9.80   21.00
 -10  10   1   -8.90   16.90
 -10  10   1  -29.30   23.80
   8 -10  -1   43.10   16.70
   8 -10  -1   38.10   28.10
   8 -10  -1   17.50   21.90
  -8 -10   1  102.19   38.10
   8 -10  -1   58.79   20.70
   8 -10  -1   20.40   18.10
  -8  10   1   50.79   19.40
  -8  10   1   73.69   19.90
   8  10  -1   44.90   21.60
  -8  10   1   62.49   26.50
  -8  10   1   52.99   19.80
   8  10  -1   53.79   22.60
  -8  10   1   39.60   16.80
   6 -10  -1    4.30   14.90
   6 -10  -1   -1.70   17.80
  -6 -10   1   40.30   29.10
   6 -10  -1   10.30   20.70
   6 -10  -1  -22.40   25.20
   6 -10  -1   21.60   15.80
   6  10  -1  -13.40   17.80
  -6  10   1   21.90   14.20
  -6  10   1  -18.40   23.30
  -6  10   1   10.20   17.50
  -6  10   1  -11.60   16.30
   6  10  -1   -4.50   18.50
  -6  10   1   31.70   16.40
   4 -10  -1   90.89   26.70
   4 -10  -1  121.49   31.20
   4 -10  -1  107.59   17.80
  -4  10   1  123.59   17.90
  -4  10   1   82.09   21.80
  -4  10   1  115.09   23.90
   4  10  -1  113.39   23.80
  -4  10   1  127.89   30.40
   2 -10  -1  111.99   30.10
  -2 -10   1  150.98   31.90
  -2  10   1  116.29   23.80
   2  10  -1  129.59   23.10
  -2  10   1  102.19   24.40
   2  10  -1  143.59   25.50
   2  10  -1  112.09   19.00
   0 -10  -1  221.48   35.30
   0 -10   1  281.47   38.60
   0  10  -1  184.58   25.70
   0  10  -1  184.38   21.00
   0  10  -1  180.88   25.90
   0  10   1  170.38   26.50
   0  10   1  149.29   25.80
   2 -10   1  119.29   28.50
  -2 -10  -1  172.38   34.70
   2 -10   1  138.89   24.50
  -2  10  -1  141.79   25.00
   2  10   1  136.99   26.00
  -2  10  -1  144.79   19.90
  -2  10  -1  102.59   22.60
   2  10   1  134.89   24.50
  -4 -10  -1  148.19   35.50
   4 -10   1   92.79   18.90
   4 -10   1  122.19   29.00
   4 -10   1  153.18   26.50
   4 -10   1  133.29   26.90
  -4  10  -1  140.69   30.40
  -4  10  -1   79.59   21.70
  -4  10  -1  145.59   24.20
   4  10   1  120.99   25.50
  -4  10  -1  139.89   19.40
   4  10   1  110.29   23.60
  -4  10  -1   96.99   20.20
   6 -10   1   63.89   18.40
   6 -10   1   12.10   20.50
  -6 -10  -1   54.99   31.90
   6 -10   1   40.90   26.10
   6 -10   1   42.40   17.00
   6 -10   1   13.70   22.10
  -6  10  -1   25.40   24.40
  -6  10  -1   49.00   16.80
  -6  10  -1   68.79   18.20
   6  10   1   16.10   19.60
  -6  10  -1   30.30   19.00
  -6  10  -1   23.10   17.50
   6  10   1   69.49   21.70
   8 -10   1   32.00   19.20
   8 -10   1    8.60   17.30
   8 -10   1   23.20   21.70
   8 -10   1   19.60   26.10
  -8 -10  -1   34.00   35.80
   8 -10   1   45.70   21.50
  -8  10  -1   56.29   18.90
  -8  10  -1   -0.50   24.00
  -8  10  -1   48.40   19.40
  -8  10  -1   69.79   20.50
   8  10   1   29.20   21.20
  -8  10  -1   20.00   17.20
   8  10   1   49.99   21.80
  10 -10   1   25.70   19.30
  10 -10   1  -28.30   17.20
  10 -10   1  -15.30   25.30
 -10 -10  -1    3.90   37.80
  10 -10   1   11.90   21.40
 -10  10  -1   -8.70   18.50
 -10  10  -1   -2.90   25.50
 -10  10  -1   34.50   18.70
 -10  10  -1   22.90   19.90
  10  10   1   16.10   21.70
  10  10   1   26.30   21.50
  12 -10   1  -14.40   21.30
  12 -10   1   40.90   22.10
  12 -10   1   15.90   43.00
 -12 -10  -1  -11.50   42.60
  12 -10   1   10.10   20.30
  12  10   1   37.30   24.00
  12  10   1   19.50   21.30
 -12  10  -1   24.30   23.10
 -12  10  -1  -13.80   20.10
  14 -10   1   -1.60   21.40
 -14 -10  -1  -56.79   42.70
  14 -10   1   40.20   23.90
  14  10   1    9.10   23.30
 -14  10  -1   45.10   25.80
 -14  10  -1   -8.40   22.20
  14  10   1   -6.10   21.70
 -16 -10  -1  -57.99   48.30
  16 -10   1   29.40   25.80
  16 -10   1    0.80   22.90
 -16  10  -1   38.00   28.20
  16  10   1   10.90   26.80
  16  10   1    1.10   24.40
 -16  10  -1   -6.80   24.30
  18 -10   1   -6.50   27.40
  18 -10   1   15.70   25.70
 -18 -10  -1  -73.59   51.69
  18  10   1   38.60   27.90
  18  10   1   25.20   26.00
 -18  10  -1   27.40   28.00
 -18  10  -1   49.70   32.10
  17 -11  -1   29.10   25.60
 -17 -11   1  -37.30   51.29
  17 -11  -1   68.39   29.20
 -17  11   1   65.29   29.40
  17  11  -1   85.29   31.50
 -17  11   1   89.09   32.70
  17  11  -1   71.19   30.50
  15 -11  -1  123.19   31.30
 -15 -11   1   49.30   51.59
  15 -11  -1  127.59   26.10
  15 -11  -1  142.29   40.40
  15  11  -1  137.09   31.10
 -15  11   1   49.00   59.79
 -15  11   1  111.29   28.90
  15  11  -1   75.19   29.50
 -15  11   1  144.19   34.20
  13 -11  -1    2.70   22.50
  13 -11  -1   40.20   20.70
 -13 -11   1  -30.00   41.80
  13 -11  -1   43.10   32.10
  13  11  -1  -48.90   21.70
 -13  11   1   -7.90   21.30
  13  11  -1   13.50   23.90
 -13  11   1   20.00   25.50
 -13  11   1   17.80   27.50
  11 -11  -1   -3.40   19.70
  11 -11  -1  -42.10   24.60
 -11 -11   1   15.70   38.90
  11 -11  -1    9.70   30.80
  11 -11  -1  -11.00   21.60
  11 -11  -1   -4.80   18.10
 -11  11   1  -21.40   17.80
  11  11  -1  -16.80   20.80
 -11  11   1   -0.90   28.00
  11  11  -1   25.60   22.50
 -11  11   1   -9.90   18.20
 -11  11   1    5.80   21.80
   9 -11  -1   72.39   19.20
   9 -11  -1   70.59   24.70
   9 -11  -1   18.70   30.00
   9 -11  -1   48.70   19.70
   9 -11  -1   48.00   23.80
  -9 -11   1   52.39   38.20
  -9  11   1   15.20   18.90
  -9  11   1   57.29   20.30
  -9  11   1   45.20   21.60
  -9  11   1   54.19   21.90
   9  11  -1   58.99   24.50
   9  11  -1   32.30   22.60
  -9  11   1   33.60   29.50
  -7 -11   1  187.88   38.90
   7 -11  -1  206.18   36.30
   7 -11  -1  234.48   31.10
   7 -11  -1  141.49   29.00
   7 -11  -1  232.88   31.00
   7  11  -1  168.18   28.10
  -7  11   1  182.48   27.30
  -7  11   1  216.98   27.80
   7  11  -1  201.78   29.60
  -7  11   1  196.78   36.20
  -5 -11   1  405.26   48.60
   5 -11  -1  319.07   36.60
   5 -11  -1  365.06   43.80
   5 -11  -1  312.77   36.80
  -5  11   1  380.06   37.60
  -5  11   1  291.37   41.20
  -5  11   1  341.57   36.30
   5  11  -1  289.57   35.20
   5  11  -1  291.27   33.50
   3 -11  -1   77.39   30.00
  -3 -11   1   74.09   31.60
   3 -11  -1   39.70   26.10
  -3  11   1   63.09   24.30
   3  11  -1   33.50   19.80
   3  11  -1   36.20   21.70
  -3  11   1   22.70   20.10
   1 -11  -1  264.37   38.80
  -1 -11   1  286.27   42.90
   1  11  -1  229.18   29.80
  -1  11   1  224.38   30.50
   1  11  -1  215.38   30.10
  -1  11   1  246.68   30.10
   1 -11   1   89.59   23.80
  -1 -11  -1   98.59   32.20
   1 -11   1  132.89   30.20
  -1  11  -1   62.89   22.60
  -1  11  -1   73.29   26.90
   1  11   1   79.09   24.40
  -1  11  -1   79.59   24.50
   1  11   1   56.79   22.70
   3 -11   1  109.69   28.90
  -3 -11  -1   70.29   34.40
   3 -11   1   77.49   24.40
   3  11   1   56.69   23.10
  -3  11  -1   31.50   17.20
   3  11   1   37.50   23.00
  -3  11  -1   37.50   21.10
  -3  11  -1   62.59   22.20
   5 -11   1  153.18   22.40
  -5 -11  -1  175.68   39.30
   5 -11   1  152.98   27.90
   5 -11   1  258.77   39.10
   5 -11   1  155.08   28.20
  -5  11  -1  137.79   25.10
   5  11   1  160.78   28.50
  -5  11  -1  180.18   23.30
  -5  11  -1  141.29   25.50
   5  11   1  142.09   27.60
  -5  11  -1  149.09   37.70
   7 -11   1  284.67   34.10
   7 -11   1  239.98   54.99
   7 -11   1  150.98   30.00
   7 -11   1  208.48   24.60
   7 -11   1  189.48   28.20
  -7 -11  -1  191.68   42.60
  -7  11  -1  176.88   26.10
   7  11   1  168.58   28.50
  -7  11  -1  191.18   24.10
  -7  11  -1  181.88   27.10
   7  11   1  164.98   28.40
  -7  11  -1  227.28   40.90
  -9 -11  -1  131.49   44.40
   9 -11   1  137.69   24.60
   9 -11   1  153.08   29.10
   9 -11   1  142.19   23.40
  -9  11  -1  123.69   24.30
  -9  11  -1  110.99   25.10
   9  11   1  117.29   28.20
   9  11   1  119.99   28.00
  -9  11  -1  139.59   26.30
  11 -11   1   52.89   22.30
  11 -11   1   63.89   24.40
  11 -11   1   25.30   24.30
 -11 -11  -1   11.00   41.70
 -11  11  -1   69.79   23.40
  11  11   1   40.80   24.70
  11  11   1   18.90   23.20
 -11  11  -1   37.30   24.60
 -11  11  -1   39.40   25.80
  13 -11   1  -24.30   23.00
  13 -11   1    9.10   23.10
 -13 -11  -1    2.50   46.80
  13  11   1    4.50   24.60
  13  11   1   18.60   25.70
 -13  11  -1  -25.60   22.60
 -13  11  -1  -29.20   24.20
 -15 -11  -1  -41.70   47.80
  15 -11   1    8.20   26.20
  15 -11   1   23.10   23.70
 -15  11  -1    3.10   26.00
  15  11   1   -7.00   26.20
  15  11   1  -13.50   26.30
 -15  11  -1    3.90   29.10
 -17 -11  -1  -42.10   53.89
  17 -11   1   17.70   26.20
  17 -11   1   23.50   29.10
 -17  11  -1   -6.00   31.20
  17  11   1   36.30   28.30
 -17  11  -1   16.90   28.50
  17  11   1   17.00   29.90
  14 -12  -1  109.59   34.20
 -14 -12   1   50.39   51.39
  14 -12  -1  105.29   31.00
 -14  12   1   59.19   31.90
  14  12  -1   90.89   30.50
  14  12  -1   64.39   31.20
  12 -12  -1   26.70   28.40
 -12 -12   1  -24.90   45.40
  12  12  -1   50.39   29.10
  12  12  -1   13.80   25.30
  10 -12  -1   47.40   31.10
 -10 -12   1   62.49   43.10
  10 -12  -1   29.10   26.40
  10 -12  -1   -6.80   27.50
 -10  12   1   21.20   37.30
  10  12  -1   20.00   26.40
  10  12  -1   32.40   23.80
 -10  12   1   40.60   23.10
   8 -12  -1   81.79   33.30
  -8 -12   1   75.99   39.40
   8 -12  -1   48.00   25.80
   8 -12  -1   76.49   28.10
  -8  12   1  102.69   33.50
  -8  12   1   80.39   24.90
  -8  12   1   19.30   22.90
   8  12  -1   70.69   25.90
   8  12  -1   52.59   25.00
   6 -12  -1  145.79   29.60
   6 -12  -1  149.79   33.00
   6 -12  -1  101.69   28.10
  -6 -12   1  107.59   37.00
   6  12  -1  128.39   27.10
  -6  12   1   73.99   34.70
   6  12  -1   94.49   27.00
  -6  12   1  111.69   25.50
  -6  12   1  102.09   27.90
   4 -12  -1   60.49   25.10
   4 -12  -1   69.29   28.90
   4 -12  -1   33.40   25.50
  -4 -12   1   60.39   32.20
  -4  12   1   31.00   25.10
   4  12  -1   48.30   23.60
   4  12  -1   26.70   22.70
  -4  12   1   64.99   22.40
  -2 -12   1   -5.00   28.60
   2 -12  -1  -50.59   24.90
   2 -12  -1   16.20   27.60
  -2  12   1    5.10   19.60
  -2  12   1   -2.80   22.20
   2  12  -1   10.50   22.80
   2  12  -1   -7.40   20.60
   0 -12   1   44.30   27.70
   0 -12  -1   63.69   31.00
   0 -12   1   29.80   23.00
   0  12   1   11.80   21.30
   0  12  -1   -9.10   19.80
   0  12  -1    4.80   22.70
   0  12   1    1.20   20.50
  -2 -12  -1   57.99   33.90
   2 -12   1   96.59   26.10
   2  12   1   63.09   23.80
  -2  12  -1   33.50   21.70
   2  12   1   25.40   23.10
  -2  12  -1   27.50   23.50
   4 -12   1  100.29   28.50
  -4 -12  -1  153.78   39.30
   4 -12   1  101.09   27.70
   4  12   1   81.49   27.60
   4  12   1  115.39   26.50
  -4  12  -1  100.99   24.60
  -4  12  -1   82.49   24.30
   6 -12   1   28.40   26.80
   6 -12   1   50.29   25.20
   6 -12   1   60.49   24.20
  -6 -12  -1   63.99   36.40
   6  12   1   28.20   25.80
   6  12   1   58.19   25.30
  -6  12  -1   41.40   22.60
  -6  12  -1   41.70   22.00
   8 -12   1   87.39   24.30
   8 -12   1  111.29   29.40
  -8 -12  -1  112.79   43.10
   8  12   1   55.29   27.00
  -8  12  -1   36.50   24.00
  -8  12  -1   62.49   24.40
   8  12   1   63.39   26.70
 -10 -12  -1   49.80   44.90
  10 -12   1   49.60   24.50
  10  12   1   56.09   29.10
  10  12   1   45.90   28.10
 -10  12  -1    8.50   24.30
 -10  12  -1   62.69   25.80
 -12 -12  -1   22.40   47.50
  12 -12   1   20.40   24.80
  12 -12   1   21.80   25.80
  12  12   1   24.80   28.60
 -12  12  -1   14.10   26.40
  12  12   1  -17.80   26.60
 -12  12  -1   -0.50   28.30
  14 -12   1    4.00   26.30
 -14 -12  -1    3.60   52.29
  14 -12   1   33.50   29.30
  14  12   1   22.40   28.50
 -14  12  -1    1.20   27.70
  14  12   1    3.40   27.90
 -14  12  -1  -14.60   30.70
 -11 -13   1   30.90   47.00
  11  13  -1   31.90   29.10
  11  13  -1   35.90   28.70
   9 -13  -1   73.39   32.10
  -9 -13   1   45.80   43.70
   9 -13  -1   52.99   28.10
   9  13  -1   37.00   28.00
  -9  13   1   33.90   24.70
   9  13  -1   88.19   29.20
  -9  13   1   41.50   42.10
   7 -13  -1    8.30   25.10
   7 -13  -1   -0.40   26.40
  -7 -13   1   49.60   40.30
   7  13  -1   28.70   28.00
  -7  13   1    0.30   22.60
  -7  13   1    0.70   23.00
   7  13  -1    6.10   24.70
  -5 -13   1   51.59   41.20
   5 -13  -1   12.80   25.60
   5 -13  -1   13.60   29.20
   5 -13  -1  -19.30   27.30
   5  13  -1   17.80   23.90
  -5  13   1  -23.50   21.20
  -5  13   1   -5.40   23.60
   5  13  -1    3.10   25.80
   3 -13  -1   33.90   25.00
   3 -13  -1  119.89   32.10
   3 -13  -1    2.40   27.30
   3  13  -1    4.30   24.90
  -3  13   1   37.40   24.80
  -3  13   1   21.10   26.50
   3  13  -1   56.69   26.30
   1 -13  -1   69.19   31.50
  -1 -13   1   70.79   28.50
   1  13  -1   30.50   24.80
  -1  13   1  -14.40   25.60
  -1  13   1   28.20   24.80
   1  13  -1    6.40   26.50
  -1 -13  -1   90.79   34.80
   1 -13   1   98.49   30.20
   1  13   1   62.19   26.80
   1  13   1   83.69   28.30
  -1  13  -1   78.79   29.20
  -1  13  -1   51.09   24.60
   3 -13   1   27.80   27.70
   3 -13   1   32.50   28.50
  -3 -13  -1  106.09   38.80
  -3  13  -1   48.50   25.30
   3  13   1   36.20   25.10
  -3  13  -1   17.80   23.00
   3  13   1   18.70   26.10
  -5 -13  -1   43.30   36.30
   5 -13   1  -15.90   27.00
   5 -13   1  -31.60   25.10
  -5  13  -1    0.00   22.50
   5  13   1   86.29   29.40
  -5  13  -1   -1.00   23.40
   5  13   1  -39.50   24.20
   7 -13   1   -6.30   27.20
  -7 -13  -1   14.90   40.90
   7  13   1    9.50   24.40
   7  13   1  -15.60   27.60
  -7  13  -1  -19.40   23.30
  -9 -13  -1  103.99   47.40
   9 -13   1   14.60   28.10
   9  13   1    3.10   26.50
   9  13   1   16.00   29.90
  -9  13  -1   32.40   26.40
 -11 -13  -1   -6.50   47.20
  11  13   1   52.59   30.60
  11  13   1   27.90   30.60
   6 -14  -1  102.59   33.60
   6 -14  -1   78.89   30.70
  -6  14   1   69.69   28.40
   6  14  -1   28.40   29.70
   6  14  -1   79.39   32.40
  -6  14   1  113.79   29.50
   4 -14  -1   34.30   31.70
   4 -14  -1   69.09   30.00
  -4 -14   1   62.99   32.00
  -4  14   1  113.09   32.10
  -4  14   1   31.90   26.60
   4  14  -1   36.40   29.00
   4  14  -1    5.90   29.60
   2 -14  -1    7.40   29.10
  -2 -14   1   44.00   29.50
   2 -14  -1   74.39   29.80
  -2  14   1   39.80   28.10
   2  14  -1    8.90   26.90
   2  14  -1   14.80   29.20
  -2  14   1   32.70   30.40
   0 -14   1   15.80   27.60
   0 -14  -1  113.39   55.59
   0 -14  -1  -53.49   27.80
   0  14  -1    1.20   26.00
   0  14   1   37.90   29.00
   0  14   1  -30.80   25.30
   0  14  -1   43.40   29.20
   2 -14   1  -16.80   27.80
   2 -14   1  -33.30   28.00
  -2 -14  -1   83.29   36.40
   2  14   1  -19.70   25.20
  -2  14  -1  -23.10   23.80
   2  14   1   28.50   30.50
  -2  14  -1   -2.80   26.40
   4 -14   1   23.70   28.70
  -4 -14  -1  115.89   39.30
   4 -14   1    1.90   29.10
  -4  14  -1   10.20   25.70
   4  14   1    9.40   27.80
   4  14   1   36.10   30.40
  -4  14  -1   20.10   25.70
   6 -14   1   40.60   32.60
  -6 -14  -1   87.09   43.50
  -6  14  -1   17.40   26.40
   6  14   1   21.10   29.10
   6  14   1  -20.00   27.20
 -28   0   2   38.00   44.50
  28   0  -2   60.39   26.90
  28   0  -2   74.69   40.80
 -28   0   2   52.89   31.20
 -26   0   2  169.78   32.90
  26   0  -2  197.38   29.90
 -26   0   2  119.79   44.40
  26   0  -2  177.78   30.70
  24   0  -2 1458.05   61.29
  24   0  -2 1431.06   55.59
 -24   0   2 1526.35   63.79
 -24   0   2 1423.86   79.09
 -22   0   2  624.14   56.19
  22   0  -2  658.73   43.30
 -22   0   2  673.03   44.60
  22   0  -2  585.64   42.10
  20   0  -2 1089.19   43.40
 -20   0   2 1165.28   50.19
  20   0  -2 1187.28   48.60
 -20   0   2 1084.99   60.99
  20   0  -2 1114.59   48.50
  18   0  -2  466.05   32.10
  18   0  -2  485.65   29.70
  18   0  -2  429.76   34.20
 -18   0   2  420.26   40.80
 -18   0   2  469.85   32.90
  16   0  -2  133.39   16.20
  16   0  -2  143.69   18.40
  16   0  -2  151.68   21.50
 -16   0   2  145.09   25.00
 -16   0   2  148.49   18.60
 -14   0   2   61.89   13.30
  14   0  -2   51.99   13.20
 -14   0   2   74.69   19.90
  14   0  -2   56.49   12.00
  14   0  -2   71.39   17.10
 -12   0   2  701.13   34.40
  12   0  -2  730.83   25.50
  12   0  -2  733.43   29.80
  12   0  -2  707.63   27.60
 -12   0   2  706.33   28.40
 -10   0   2  426.66   25.00
 -10   0   2  390.26   20.30
  10   0  -2  436.96   21.90
  10   0  -2  429.36   18.20
  10   0  -2  393.06   19.80
   8   0  -2  491.45   17.10
  -8   0   2  482.55   22.80
   8   0  -2  499.95   18.90
   8   0  -2  512.25   20.60
  -8   0   2  488.45   19.30
  -6   0   2   12.40    7.50
   6   0  -2    9.70    5.50
   6   0  -2   13.20    5.30
  -6   0   2    5.90    6.20
   6   0  -2   31.00    7.70
  -4   0   2 5959.20   89.49
   4   0  -2 5956.10   86.09
   4   0  -2 6060.79   86.89
   4   0  -2 5902.11   83.89
   2   0  -2 2043.50   32.30
  -2   0   2 1952.00   29.20
   2   0  -2 2014.60   30.40
   2   0  -2 1979.10   31.90
  -2   0   2 2063.69   33.00
   0   0  -2 8761.52  117.99
   0   0   2 9006.70  120.19
   0   0  -2 8871.71  120.89
   0   0  -2 8709.83  118.79
   2   0   2 8016.00  111.49
   2   0   2 8385.76  114.19
  -2   0  -2 8227.78  114.89
  -2   0  -2 7899.41  111.29
  -2   0  -2 8310.47  116.69
  -4   0  -2 2348.17   43.00
  -4   0  -2 2339.47   39.30
   4   0   2 2360.96   39.30
   4   0   2 2413.86   41.40
  -4   0  -2 2393.46   46.70
  -6   0  -2 1784.12   42.50
   6   0   2 1759.52   33.70
  -6   0  -2 1743.93   38.20
   6   0   2 1762.02   35.10
  -6   0  -2 1725.93   33.70
  -8   0  -2  483.85   18.40
  -8   0  -2  491.05   27.00
   8   0   2  479.65   18.20
  -8   0  -2  500.55   22.10
   8   0   2  469.05   18.90
  10   0   2   -5.70    8.40
 -10   0  -2    9.50   14.20
 -10   0  -2   17.00    9.50
  10   0   2    2.20    7.90
 -12   0  -2  226.88   28.90
  12   0   2  207.98   18.50
  12   0   2  239.28   18.60
  12   0   2  240.38   17.60
 -12   0  -2  236.98   22.20
  14   0   2  235.28   24.50
  14   0   2  222.88   19.60
 -14   0  -2  219.88   24.20
 -14   0  -2  204.78   28.40
  14   0   2  221.58   21.50
  16   0   2  126.29   19.70
 -16   0  -2  131.89   19.90
  16   0   2  129.49   21.30
 -16   0  -2  125.59   28.80
  16   0   2  136.19   17.30
  16   0   2  123.19   18.70
 -18   0  -2   41.30   28.00
  18   0   2   46.60   17.40
  18   0   2   19.90   14.80
  18   0   2   16.20   17.90
 -18   0  -2   17.00   17.40
  20   0   2  177.58   24.50
 -20   0  -2  181.98   39.70
 -20   0  -2  204.28   27.60
  20   0   2  174.28   27.40
  22   0   2  175.38   29.80
  22   0   2  210.08   27.30
 -22   0  -2  255.97   48.00
 -22   0  -2  168.98   30.50
 -24   0  -2  452.55   48.20
  24   0   2  514.25   49.30
 -24   0  -2  408.16   59.09
  24   0   2  512.25   43.10
 -26   0  -2  230.68   55.79
  26   0   2  428.76   44.30
 -27  -1   2   61.49   42.60
  27  -1  -2  114.39   27.20
  27  -1  -2   96.19   30.00
 -27   1   2  138.99   33.10
  27   1  -2  127.09   28.10
 -27   1   2   71.09   44.80
  25  -1  -2  161.78   30.10
 -25  -1   2  156.38   29.00
 -25  -1   2   88.69   42.40
  25  -1  -2  198.98   28.20
  25   1  -2  134.59   26.60
  25   1  -2  131.79   26.50
 -25   1   2  122.19   43.00
 -25   1   2  148.69   32.10
 -23  -1   2  905.01   67.09
  23  -1  -2  934.51   47.00
  23  -1  -2  972.00   53.09
 -23  -1   2  941.41   49.40
 -23   1   2  910.81   64.49
  23   1  -2  853.41   71.79
  23   1  -2  944.41   47.60
  23   1  -2  953.90   45.60
 -23   1   2  972.20   55.19
 -21  -1   2  455.55   36.70
  21  -1  -2  368.06   34.10
  21  -1  -2  406.46   37.40
  21  -1  -2  407.66   38.90
 -21  -1   2  370.86   48.60
  21   1  -2  355.16   36.80
  21   1  -2  463.55   35.40
  21   1  -2  445.66   34.20
 -21   1   2  436.26   40.10
 -21   1   2  378.96   45.10
 -19  -1   2  530.15   47.50
  19  -1  -2  478.55   37.40
 -19  -1   2  495.45   34.70
  19  -1  -2  490.45   32.80
  19  -1  -2  575.64   38.30
  19   1  -2  477.35   36.00
  19   1  -2  540.45   33.50
 -19   1   2  468.65   42.80
 -19   1   2  502.65   38.20
  19   1  -2  486.35   31.80
 -17  -1   2  460.35   29.90
 -17  -1   2  414.96   38.70
  17  -1  -2  433.36   26.80
  17  -1  -2  438.36   32.80
  17  -1  -2  468.75   32.10
  17   1  -2  425.86   28.40
  17   1  -2  426.06   31.30
 -17   1   2  392.96   32.00
 -17   1   2  386.56   35.70
  17   1  -2  423.26   26.70
  15  -1  -2   39.90   13.80
  15  -1  -2   31.60   12.10
 -15  -1   2   50.99   19.30
 -15  -1   2   50.49   13.30
  15  -1  -2   32.60   16.20
 -15   1   2   35.30   14.10
  15   1  -2   62.69   16.50
  15   1  -2   47.00   12.50
  15   1  -2   54.59   12.40
 -15   1   2   36.30   17.10
 -13  -1   2  119.59   20.50
  13  -1  -2  120.09   17.10
 -13  -1   2   79.39   12.70
  13  -1  -2  109.29   15.60
  13  -1  -2   95.69   13.20
  13   1  -2  104.29   16.40
  13   1  -2   71.89   11.60
 -13   1   2   92.89   18.30
  13   1  -2   82.89   12.40
 -13   1   2  102.79   15.70
 -11  -1   2  131.99   15.30
  11  -1  -2  135.49   14.70
  11  -1  -2  124.39   14.20
  11  -1  -2  135.69   15.40
 -11  -1   2  119.09   18.20
  11   1  -2  120.79   14.40
 -11   1   2  139.59   19.40
  11   1  -2  118.69   15.20
 -11   1   2  114.79   14.10
  11   1  -2   86.49   10.70
   9  -1  -2   47.40    9.40
   9  -1  -2   37.00    7.50
  -9  -1   2   48.90   12.40
   9  -1  -2   28.00    9.30
  -9  -1   2   40.90    8.30
  -9   1   2   49.80   11.70
   9   1  -2   41.50    7.50
  -9   1   2   41.60    9.30
   9   1  -2   35.20    7.50
   9   1  -2   46.40   10.90
   7  -1  -2   18.60    7.00
   7  -1  -2   28.90    6.40
   7  -1  -2   24.50    7.80
  -7  -1   2   30.80    7.30
  -7  -1   2   31.70    9.70
   7   1  -2   19.10    6.20
  -7   1   2   26.60    8.80
   7   1  -2   12.40    6.10
   7   1  -2   31.50    9.90
  -7   1   2   29.60    8.10
   5  -1  -2  279.37   12.70
   5  -1  -2  253.07   10.50
   5  -1  -2  263.47   13.00
  -5  -1   2  278.27   15.50
   5   1  -2  243.38   11.20
   5   1  -2  262.87   15.40
  -5   1   2  238.78   13.90
   5   1  -2  238.18   10.90
   5   1  -2  266.07   10.20
  -5   1   2  268.87   15.00
   3  -1  -2 2226.28   37.90
   3  -1  -2 2281.17   38.20
  -3  -1   2 2256.47   36.20
   3  -1  -2 2317.07   34.60
  -3  -1   2 2251.77   37.80
   3   1  -2 2415.06   39.40
   3   1  -2 2261.07   35.70
   3   1  -2 2293.97   36.20
  -3   1   2 2300.47   41.50
  -3   1   2 2291.37   37.60
   3   1  -2 2262.27   36.40
   1  -1  -2 1076.79   21.20
   1  -1  -2 1160.58   24.70
   1  -1  -2 1112.39   20.40
  -1  -1   2 1134.89   20.70
   1   1  -2 1121.99   20.60
  -1   1   2 1134.99   21.20
   1   1  -2 1148.39   20.50
   1   1  -2 1101.09   21.00
  -1   1   2 1139.39   19.80
  -1   1   2 1122.69   24.30
   1   1  -2 1160.38   20.80
   1  -1   2 4382.16   64.69
  -1  -1  -2 4464.05   70.19
  -1  -1  -2 4362.56   63.19
  -1   1  -2 4365.96   63.89
   1   1   2 4423.96   64.79
  -1   1  -2 4425.26   66.39
   1   1   2 4449.75   64.49
  -3  -1  -2 9612.14  134.19
  -3  -1  -2 9865.41  144.39
   3  -1   2 9588.24  134.59
   3  -1   2 9768.42  135.19
   3   1   2 9999.00  135.19
   3   1   2 9694.63  135.79
  -3   1  -2 9519.35  138.39
  -3   1  -2 9518.35  134.39
  -5  -1  -2 3823.82   71.79
  -5  -1  -2 3732.13   61.69
   5  -1   2 3833.42   61.49
   5  -1   2 3880.11   61.79
   5   1   2 3826.02   62.29
   5   1   2 4074.79   62.49
  -5   1  -2 3795.12   66.29
   5   1   2 3793.02   58.49
  -5   1  -2 3822.92   66.69
  -5   1  -2 3802.42   61.19
  -7  -1  -2 1281.77   31.40
  -7  -1  -2 1287.47   40.70
   7  -1   2 1288.97   29.90
   7  -1   2 1349.07   30.40
   7   1   2 1294.27   29.90
  -7   1  -2 1277.97   36.20
   7   1   2 1279.67   30.10
   7   1   2 1267.27   27.90
  -7   1  -2 1236.58   29.70
  -7   1  -2 1262.07   34.80
  -9  -1  -2   83.79   11.20
   9  -1   2   88.99   10.50
   9  -1   2   79.39   10.70
  -9  -1  -2   95.99   18.40
   9   1   2   54.39    9.70
  -9   1  -2  100.99   11.50
   9   1   2   71.19   10.50
  -9   1  -2   75.09   12.90
   9   1   2   76.79   10.30
  -9   1  -2  109.59   17.10
 -11  -1  -2   37.80   10.60
 -11  -1  -2   64.69   19.30
  11  -1   2   44.30   10.30
  11  -1   2   50.99   10.30
  11   1   2   20.40    9.90
  11   1   2   35.70   10.30
  11   1   2   59.49   10.60
 -11   1  -2   47.60   11.20
 -11   1  -2   42.80   16.00
 -11   1  -2   51.69   13.10
 -13  -1  -2  116.49   24.70
 -13  -1  -2   90.49   14.60
  13  -1   2   95.89   13.40
  13  -1   2   99.39   14.00
 -13   1  -2   83.59   15.80
  13   1   2   88.59   13.60
  13   1   2   78.49   12.30
  13   1   2   89.09   13.50
 -13   1  -2   94.49   21.40
  15  -1   2   87.89   14.70
  15  -1   2   85.29   17.80
 -15  -1  -2   90.89   17.00
  15  -1   2  104.89   16.30
 -15  -1  -2  115.49   27.80
  15   1   2  109.29   16.00
 -15   1  -2   61.89   17.00
  15   1   2  145.19   17.00
  15   1   2  126.09   16.00
  15   1   2   98.59   17.00
 -15   1  -2   93.09   23.70
  17  -1   2   64.89   19.00
 -17  -1  -2   56.19   29.30
  17  -1   2   94.79   19.00
  17  -1   2   89.39   16.20
 -17  -1  -2   70.49   18.40
  17   1   2   66.09   17.80
 -17   1  -2   85.99   28.40
  17   1   2  146.59   19.70
 -17   1  -2   61.99   19.90
  17   1   2   88.09   17.30
 -19  -1  -2   -4.30   30.60
  19  -1   2  -12.60   17.10
  19  -1   2  -19.90   18.30
 -19  -1  -2   -6.70   16.30
 -19   1  -2    5.50   18.60
 -19   1  -2   -2.10   27.40
  19   1   2   -7.30   14.30
  19   1   2    9.20   17.00
  19   1   2   -4.30   17.00
  21  -1   2  149.88   24.80
 -21  -1  -2  126.99   25.30
  21  -1   2  125.79   28.20
 -21  -1  -2  118.19   40.10
 -21   1  -2  109.89   38.70
  21   1   2  103.99   24.80
  21   1   2  166.38   25.00
 -21   1  -2  126.79   27.80
 -23  -1  -2  232.88   36.70
  23  -1   2  264.87   30.90
 -23  -1  -2  192.58   48.50
  23   1   2  233.38   28.70
 -23   1  -2  209.88   33.80
 -23   1  -2  404.46   55.39
  25  -1   2  164.08   29.80
 -25  -1  -2  120.29   48.60
  25  -1   2  162.58   34.80
  25   1   2  205.38   29.70
 -25   1  -2  130.19   46.10
 -25   1  -2  153.88   34.60
 -26  -2   2   -0.60   38.60
  26  -2  -2   19.60   26.50
  26  -2  -2   52.29   26.20
 -26   2   2   29.50   37.90
  26   2  -2    1.60   23.40
 -26   2   2   17.20   28.40
  24  -2  -2   67.89   23.00
 -24  -2   2    4.80   36.20
  24  -2  -2   86.99   27.80
 -24   2   2   40.20   27.70
 -24   2   2   32.20   33.90
  24   2  -2   48.30   23.40
 -22  -2   2   23.70   31.80
  22  -2  -2   50.99   20.50
  22  -2  -2   39.40   23.20
 -22  -2   2   15.00   18.60
  22   2  -2   37.70   17.60
  22   2  -2   19.30   19.60
 -22   2   2   61.19   24.60
 -22   2   2   14.30   30.00
  22   2  -2   60.09   22.50
 -20  -2   2    0.80   15.50
 -20  -2   2  -14.00   25.00
  20  -2  -2   -0.10   22.20
  20  -2  -2    1.20   16.80
  20  -2  -2   -4.50   17.90
  20   2  -2    2.30   18.80
 -20   2   2   -0.20   18.40
  20   2  -2    4.60   14.20
 -20   2   2   -2.50   23.80
  20   2  -2    1.70   15.90
  18  -2  -2   29.00   17.50
  18  -2  -2   23.30   20.60
 -18  -2   2   17.70   24.60
 -18  -2   2   33.60   15.20
  18  -2  -2   11.70   16.20
  18   2  -2   34.00   12.50
  18   2  -2   31.00   18.90
  18   2  -2   17.50   13.80
 -18   2   2   26.80   18.10
  18   2  -2   47.50   13.90
 -18   2   2   48.90   22.00
  16  -2  -2  138.99   20.10
  16  -2  -2   81.39   19.40
 -16  -2   2  142.39   27.40
 -16  -2   2  140.39   17.30
  16  -2  -2  115.19   17.50
 -16   2   2  102.59   19.60
  16   2  -2  129.69   14.20
  16   2  -2  130.09   16.10
  16   2  -2  109.49   14.60
 -16   2   2  103.29   22.40
  16   2  -2  145.29   21.00
 -14  -2   2  438.76   36.30
  14  -2  -2  372.66   27.90
  14  -2  -2  399.16   27.80
 -14  -2   2  480.75   24.90
  14  -2  -2  390.76   24.60
  14   2  -2  462.55   23.60
 -14   2   2  393.86   31.50
  14   2  -2  426.76   22.90
  14   2  -2  384.26   19.70
  14   2  -2  433.66   28.30
 -14   2   2  373.26   29.60
 -12  -2   2  472.65   32.70
  12  -2  -2  377.46   25.00
  12  -2  -2  383.56   25.20
 -12  -2   2  479.55   22.00
  12  -2  -2  413.76   21.90
 -12   2   2  404.46   26.70
 -12   2   2  394.26   28.50
  12   2  -2  397.26   21.40
  12   2  -2  397.46   20.60
  12   2  -2  425.66   19.00
  12   2  -2  433.76   26.50
  10  -2  -2 1732.73   44.50
  10  -2  -2 1773.82   38.70
  10  -2  -2 1602.64   40.80
 -10  -2   2 1814.22   51.09
 -10  -2   2 1770.82   38.00
  10   2  -2 1846.82   44.90
  10   2  -2 1725.33   37.80
 -10   2   2 1715.03   48.90
 -10   2   2 1780.22   46.10
  10   2  -2 1680.83   36.10
  10   2  -2 1764.42   37.40
  -8  -2   2 2056.39   49.99
   8  -2  -2 2049.29   39.70
   8  -2  -2 2041.30   45.80
   8  -2  -2 2109.69   42.70
   8   2  -2 1988.90   39.00
   8   2  -2 2103.49   45.90
   8   2  -2 2012.10   37.70
  -8   2   2 2066.09   46.90
   8   2  -2 2048.40   39.40
  -8   2   2 2060.79   49.60
   6  -2  -2 1480.05   29.10
  -6  -2   2 1491.65   37.60
   6  -2  -2 1472.65   34.50
   6  -2  -2 1466.05   31.90
  -6   2   2 1500.55   38.00
  -6   2   2 1423.56   34.60
   6   2  -2 1511.55   35.80
   6   2  -2 1474.05   31.50
   6   2  -2 1462.25   30.00
   4  -2  -2 8004.10  110.19
  -4  -2   2 7795.52  117.49
   4  -2  -2 8061.79  115.69
   4  -2  -2 7941.61  116.09
   4   2  -2 8047.40  112.79
   4   2  -2 8037.90  117.89
   4   2  -2 7828.72  114.79
  -4   2   2 8054.29  121.79
  -4   2   2 7835.82  116.39
  -4   2   2 8159.78  110.69
  -4   2   2 7725.33  113.99
   2  -2  -2   27.50    6.20
   2  -2  -2   23.30    4.80
  -2  -2   2   38.90    6.20
   2  -2  -2   21.90    7.10
   2   2  -2   24.20    6.40
  -2   2   2   30.00    7.60
   2   2  -2   29.20    5.30
  -2   2   2   25.30    4.80
   2   2  -2   28.70    5.30
  -2   2   2   24.60    5.00
   2   2  -2   30.70    5.50
   0  -2   2  392.26   13.70
   0  -2  -2  378.96   17.70
   0   2   2  409.86   13.10
   0   2  -2  396.46   13.80
   0   2  -2  387.96   13.00
   0   2   2  418.56   18.30
   0   2  -2  411.26   13.00
   0   2  -2  401.56   13.20
   0   2   2  395.96   13.90
   2  -2   2 1312.07   27.00
  -2  -2  -2 1271.57   35.60
  -2   2  -2 1360.26   26.60
   2   2   2 1292.87   28.30
  -2   2  -2 1273.07   28.90
  -2   2  -2 1211.08   25.60
   2   2   2 1277.77   27.00
   4  -2   2  718.53   20.50
  -4  -2  -2  735.53   31.00
   4  -2   2  750.92   20.60
  -4   2  -2  765.52   24.40
   4   2   2  750.82   21.10
   4   2   2  753.12   22.50
  -4   2  -2  718.03   20.20
   6  -2   2  257.97   14.70
  -6  -2  -2  285.87   25.10
   6  -2   2  277.37   14.90
  -6   2  -2  251.07   14.40
  -6   2  -2  267.47   16.60
   6   2   2  276.67   16.00
   6   2   2  241.78   14.40
  -6   2  -2  265.77   18.20
   6   2   2  247.08   11.50
   8  -2   2  293.67   17.10
   8  -2   2  283.77   16.60
  -8  -2  -2  306.87   29.70
  -8  -2  -2  291.27   16.40
   8   2   2  290.27   18.30
  -8   2  -2  279.47   21.30
   8   2   2  263.27   16.60
   8   2   2  277.57   14.30
  -8   2  -2  297.87   20.60
  -8   2  -2  285.67   17.10
  10  -2   2 3200.18   59.29
  10  -2   2 3049.59   60.49
 -10  -2  -2 3117.89   59.79
 -10  -2  -2 3118.49   77.09
 -10   2  -2 3117.39   68.89
 -10   2  -2 3066.09   60.69
  10   2   2 3261.17   60.99
  10   2   2 3161.98   62.59
  10   2   2 3113.59   56.09
 -10   2  -2 3172.98   70.29
 -12  -2  -2  684.53   27.90
 -12  -2  -2  699.63   42.50
  12  -2   2  635.34   27.10
  12  -2   2  655.13   26.50
 -12   2  -2  630.74   33.80
 -12   2  -2  634.94   35.10
 -12   2  -2  654.53   27.60
  12   2   2  697.33   28.50
  12   2   2  675.43   25.90
  12   2   2  670.23   27.30
 -14  -2  -2  843.72   50.09
 -14  -2  -2  821.52   32.80
  14  -2   2  812.02   30.00
  14  -2   2  828.82   33.00
  14   2   2  823.12   32.20
 -14   2  -2  820.32   39.90
  14   2   2  796.92   31.10
  14   2   2  791.22   32.10
  14   2   2  879.61   33.60
 -14   2  -2  812.62   42.70
 -14   2  -2  773.92   33.40
 -16  -2  -2  407.56   29.10
  16  -2   2  366.66   25.20
  16  -2   2  387.06   29.70
 -16  -2  -2  362.76   46.30
  16  -2   2  422.36   35.30
  16   2   2  404.96   28.20
  16   2   2  485.15   28.40
 -16   2  -2  366.36   35.20
 -16   2  -2  423.26   39.10
  16   2   2  418.46   29.70
  16   2   2  431.26   27.30
 -18  -2  -2   23.30   32.80
 -18  -2  -2   31.50   16.10
  18  -2   2   14.80   18.10
  18  -2   2   65.29   21.10
 -18   2  -2   40.40   20.40
  18   2   2   67.39   17.90
 -18   2  -2   35.90   25.70
  18   2   2   33.90   15.70
  18   2   2   38.90   16.90
  20  -2   2   73.29   23.00
 -20  -2  -2   59.79   37.10
 -20  -2  -2  103.99   22.00
  20  -2   2   93.79   25.70
 -20   2  -2   80.79   32.80
 -20   2  -2   87.49   24.00
  20   2   2   60.09   27.60
  20   2   2   97.99   20.10
 -22  -2  -2  -46.20   37.50
  22  -2   2   46.10   27.20
  22  -2   2    9.00   21.30
 -22   2  -2   26.80   24.50
 -22   2  -2   45.40   35.60
  22   2   2   66.89   21.30
  24  -2   2   15.00   26.90
 -24  -2  -2  -39.10   40.60
  24  -2   2   14.60   23.00
  24   2   2   49.20   22.00
 -24   2  -2   32.90   27.10
 -24   2  -2  -44.40   37.00
  27  -3  -2   26.60   29.50
  27  -3  -2   20.30   26.30
 -27  -3   2  -52.99   38.60
 -27   3   2   50.89   31.60
  27   3  -2    7.10   24.20
 -27   3   2  -33.80   37.60
 -25  -3   2   -9.70   38.80
  25  -3  -2   33.00   26.90
  25  -3  -2   66.99   25.50
  25   3  -2   34.00   23.80
 -25   3   2   14.40   37.30
 -25   3   2   56.09   29.90
  23  -3  -2  123.09   29.70
 -23  -3   2   53.59   38.30
  23  -3  -2  113.29   24.60
 -23   3   2  116.29   29.70
 -23   3   2   83.49   36.00
  23   3  -2  118.99   24.20
  23   3  -2  125.99   26.30
  21  -3  -2  128.29   27.60
 -21  -3   2  209.38   41.60
  21  -3  -2  156.28   24.20
  21   3  -2  205.48   25.10
  21   3  -2  159.48   26.00
 -21   3   2  164.48   29.30
 -21   3   2  160.08   35.60
  19  -3  -2   19.20   19.70
  19  -3  -2    3.60   15.60
  19  -3  -2   11.90   22.20
 -19  -3   2   28.50   28.80
 -19  -3   2   10.40   16.00
  19   3  -2   35.00   15.40
 -19   3   2   20.80   23.40
  19   3  -2   38.60   16.40
 -19   3   2    6.60   19.20
  19   3  -2    1.60   19.20
  19   3  -2   28.00   14.10
  17  -3  -2    2.50   18.60
 -17  -3   2   10.00   24.40
  17  -3  -2   39.60   18.10
 -17  -3   2   28.70   14.40
  17  -3  -2   -1.00   14.30
  17   3  -2   41.20   12.90
  17   3  -2   63.19   15.00
 -17   3   2   25.30   19.60
  17   3  -2   33.70   17.80
  17   3  -2   57.49   13.20
 -17   3   2   36.30   18.30
 -15  -3   2  219.78   21.80
  15  -3  -2  189.18   19.50
 -15  -3   2  238.98   35.90
  15  -3  -2  244.68   26.40
  15  -3  -2  177.08   22.20
  15   3  -2  235.48   19.60
  15   3  -2  183.48   22.10
  15   3  -2  265.57   19.70
 -15   3   2  222.18   28.80
 -15   3   2  173.48   21.90
  15   3  -2  275.57   22.10
  13  -3  -2 1041.50   40.00
 -13  -3   2 1086.39   48.70
  13  -3  -2 1025.40   36.30
  13  -3  -2 1015.70   34.10
  13   3  -2  989.80   31.20
  13   3  -2 1024.10   38.90
 -13   3   2  983.90   42.30
 -13   3   2 1027.90   41.40
  13   3  -2 1064.09   29.80
  13   3  -2 1013.90   31.60
  11  -3  -2  989.60   30.80
 -11  -3   2 1113.79   44.50
  11   3  -2 1031.30   30.50
  -9  -3   2 4430.06   89.39
   9  -3  -2 4539.95   75.39
   9  -3  -2 4610.54   78.99
   9  -3  -2 4476.05   83.89
  -9   3   2 4517.95   85.29
  -9   3   2 4592.84   88.89
  -9   3   2 4700.03   76.49
   9   3  -2 4396.86   73.89
   9   3  -2 4548.54   83.69
   9   3  -2 4475.65   76.99
  -7  -3   2 3260.77   67.79
   7  -3  -2 3395.56   60.39
   7  -3  -2 3260.87   55.59
   7  -3  -2 3279.67   63.29
  -7   3   2 3303.67   67.99
  -7   3   2 3322.37   56.19
   7   3  -2 3300.77   56.09
   7   3  -2 3196.58   59.29
  -7   3   2 3263.77   64.39
   7   3  -2 3300.17   63.79
  -7   3   2 3295.17   58.09
   5  -3  -2 3750.62   58.99
  -5  -3   2 3681.53   69.69
   5  -3  -2 3826.12   64.89
   5  -3  -2 3746.33   65.99
  -5   3   2 3768.52   66.69
   5   3  -2 3827.82   68.29
   5   3  -2 3753.12   65.49
  -5   3   2 3824.82   72.19
  -5   3   2 3836.42   59.59
  -5   3   2 3810.42   63.79
   5   3  -2 3778.92   61.19
  -5   3   2 3817.52   59.49
   3  -3  -2  749.53   26.10
   3  -3  -2  761.22   23.00
   3  -3  -2  740.83   21.10
   3   3  -2  767.52   20.10
  -3   3   2  778.92   22.10
  -3   3   2  776.62   20.70
   3   3  -2  756.92   23.60
  -3   3   2  745.43   22.00
  -3   3   2  773.92   26.70
   3   3  -2  756.92   22.70
   1  -3  -2 4692.23   81.79
  -1  -3   2 4571.44   75.09
   1   3  -2 4537.65   70.69
   1   3  -2 4645.33   74.39
   1   3  -2 4738.13   74.99
  -1   3   2 4648.73   75.39
   1   3  -2 4639.74   70.39
  -1   3   2 4626.74   72.79
  -1   3   2 4739.53   81.99
   1  -3   2 2033.20   39.70
  -1  -3  -2 1987.20   47.20
  -1   3  -2 1961.80   38.00
   1   3   2 2014.70   41.10
  -1   3  -2 2023.00   37.30
  -1   3  -2 1968.30   36.90
  -1   3  -2 1938.41   38.60
   1   3   2 1997.80   38.90
   3  -3   2 1735.53   36.10
  -3  -3  -2 1744.23   46.80
  -3   3  -2 1709.73   38.70
   3   3   2 1715.23   36.60
  -3   3  -2 1779.72   32.10
  -3   3  -2 1698.53   34.90
   3   3   2 1737.93   38.90
  -3   3  -2 1766.12   35.10
   5  -3   2  276.27   15.80
   5  -3   2  292.77   15.70
  -5  -3  -2  281.17   26.00
  -5   3  -2  298.87   19.00
  -5   3  -2  285.47   15.70
   5   3   2  306.67   18.00
   5   3   2  292.57   16.10
   7  -3   2   19.00    8.60
  -7  -3  -2   25.10   17.40
   7  -3   2   14.30    7.90
  -7   3  -2   17.50    9.50
  -7   3  -2   15.70   10.20
  -7   3  -2   19.30    7.90
   7   3   2   13.70    8.20
   7   3   2   13.70    8.80
   9  -3   2  958.10   30.20
  -9  -3  -2  971.50   45.60
   9  -3   2  916.31   29.80
  -9   3  -2  937.01   30.10
   9   3   2 1004.90   33.10
  -9   3  -2  923.71   36.30
  -9   3  -2  938.41   34.10
   9   3   2  996.00   30.60
   9   3   2  954.70   25.20
  11  -3   2 1699.73   43.80
 -11  -3  -2 1668.13   61.49
  11  -3   2 1778.42   42.80
 -11   3  -2 1667.43   43.40
 -11   3  -2 1635.94   50.99
  11   3   2 1679.23   46.50
  11   3   2 1720.93   43.40
 -11   3  -2 1694.83   50.29
  11   3   2 1733.63   38.30
  13  -3   2 1712.63   46.80
 -13  -3  -2 1812.42   67.79
  13  -3   2 1857.51   46.20
 -13  -3  -2 1745.63   43.60
 -13   3  -2 1683.43   54.59
 -13   3  -2 1764.42   47.00
  13   3   2 1757.72   42.20
 -13   3  -2 1679.93   54.99
  13   3   2 1817.72   47.00
  13   3   2 1728.03   43.30
  13   3   2 1723.23   49.50
  15  -3   2  743.33   35.10
  15  -3   2  806.42   42.90
 -15  -3  -2  847.42   32.80
 -15  -3  -2  760.82   53.19
  15  -3   2  805.42   33.50
  15   3   2  756.32   36.20
  15   3   2  815.52   33.90
  15   3   2  863.81   32.20
 -15   3  -2  750.12   34.50
 -15   3  -2  737.83   42.10
 -15   3  -2  798.22   43.50
  15   3   2  813.82   32.70
  17  -3   2   70.69   19.40
  17  -3   2   65.19   21.90
 -17  -3  -2   80.19   34.40
 -17  -3  -2   98.59   19.40
  17  -3   2   89.39   21.90
  17   3   2  126.99   18.40
 -17   3  -2  130.39   27.90
 -17   3  -2  127.09   24.40
  17   3   2   85.09   19.90
  17   3   2  137.39   19.90
  19  -3   2  196.08   29.90
  19  -3   2  140.59   24.20
 -19  -3  -2  157.98   41.50
  19   3   2  165.08   23.20
 -19   3  -2  175.28   28.40
  19   3   2  146.69   21.80
 -19   3  -2  204.58   36.10
  21  -3   2   13.80   24.10
  21  -3   2    1.70   21.80
 -21  -3  -2  -88.19   37.50
 -21   3  -2  -14.70   22.40
 -21   3  -2  -23.70   29.30
  21   3   2   12.10   18.10
  23  -3   2   25.20   27.60
  23  -3   2   11.50   23.40
 -23  -3  -2  -77.79   38.50
 -23   3  -2   42.10   28.00
  23   3   2   15.60   20.50
 -23   3  -2   15.50   35.20
  25  -3   2   49.00   26.40
  25  -3   2   34.40   30.60
 -25  -3  -2  -87.29   41.40
 -25   3  -2    1.30   38.60
  25   3   2   54.59   23.70
 -25   3  -2   20.90   29.50
 -26  -4   2  -30.70   41.30
  26  -4  -2   41.90   27.20
  26  -4  -2   34.30   29.80
  26   4  -2    9.10   23.50
 -26   4   2   -5.90   30.70
 -26   4   2   16.60   36.90
  24  -4  -2   36.70   27.90
  24  -4  -2   27.30   24.20
 -24  -4   2  -24.40   38.20
  24   4  -2   47.70   24.10
 -24   4   2   15.70   29.60
 -24   4   2   40.90   32.80
  24   4  -2   38.30   22.90
  22  -4  -2   66.19   27.30
 -22  -4   2   58.99   38.90
  22  -4  -2  106.19   24.60
  22   4  -2  103.59   22.30
  22   4  -2  130.69   25.40
 -22   4   2  109.59   34.70
 -22   4   2   69.59   28.30
 -20  -4   2   95.09   36.30
  20  -4  -2  118.29   26.50
  20  -4  -2  118.79   23.10
 -20   4   2  161.58   29.30
  20   4  -2  126.99   21.50
  20   4  -2  132.79   24.40
 -20   4   2  152.18   33.60
  18  -4  -2   -4.70   15.10
 -18  -4   2   -8.10   26.70
  18  -4  -2  -16.80   19.30
  18  -4  -2  -18.20   17.00
  18   4  -2   -8.80   17.10
 -18   4   2  -11.60   18.20
 -18   4   2   13.40   20.80
  18   4  -2   15.30   14.40
  18   4  -2   -2.10   13.10
 -16  -4   2   18.20   25.10
  16  -4  -2    2.70   13.00
  16  -4  -2   -4.20   16.30
  16  -4  -2   14.50   13.40
 -16   4   2   22.00   16.20
  16   4  -2   15.30   16.20
  16   4  -2    4.70   12.10
  16   4  -2   13.80   12.60
 -16   4   2   19.40   19.20
  14  -4  -2  918.41   33.60
  14  -4  -2  900.61   35.80
  14  -4  -2  887.11   39.50
 -14  -4   2  883.11   49.30
  14   4  -2  858.91   31.80
 -14   4   2  948.21   42.30
 -14   4   2  901.51   43.00
  14   4  -2  918.01   31.60
  14   4  -2  849.12   38.50
  12  -4  -2  473.75   25.30
  12  -4  -2  405.76   27.80
  12  -4  -2  389.26   22.90
 -12  -4   2  403.96   37.50
  12   4  -2  413.66   22.20
  12   4  -2  375.86   27.20
  12   4  -2  413.96   23.10
 -12   4   2  427.76   30.30
 -12   4   2  437.36   30.00
 -12   4   2  393.46   24.70
  10  -4  -2 1673.23   42.40
  10  -4  -2 1575.64   46.20
 -10  -4   2 1569.94   54.09
  10  -4  -2 1554.64   38.50
  10   4  -2 1573.24   41.00
 -10   4   2 1620.44   48.40
  10   4  -2 1558.84   45.80
  10   4  -2 1558.74   37.60
 -10   4   2 1607.84   49.70
 -10   4   2 1670.43   39.60
  -8  -4   2  911.01   39.50
   8  -4  -2  845.92   25.60
   8  -4  -2  894.41   29.70
   8  -4  -2  850.81   31.90
  -8   4   2  893.11   26.70
  -8   4   2  857.01   35.00
   8   4  -2  880.11   26.30
  -8   4   2  872.01   33.70
  -8   4   2  892.11   27.30
   8   4  -2  911.41   32.80
   8   4  -2  841.92   29.30
   6  -4  -2 1737.73   42.40
   6  -4  -2 1751.62   35.60
   6  -4  -2 1780.12   41.30
  -6  -4   2 1714.83   48.20
  -6   4   2 1775.52   47.60
  -6   4   2 1738.03   43.80
  -6   4   2 1795.82   36.30
   6   4  -2 1697.33   41.50
  -6   4   2 1771.02   39.60
   6   4  -2 1730.53   43.70
   6   4  -2 1709.73   36.30
  -6   4   2 1808.72   36.30
   4  -4  -2   64.89   12.60
   4  -4  -2   64.59    9.40
  -4  -4   2   71.99   14.50
   4  -4  -2   83.59   11.10
  -4   4   2   77.29    9.70
  -4   4   2   70.09   13.20
   4   4  -2   68.39   10.40
   4   4  -2   68.69   11.20
   4   4  -2   64.89    8.30
  -4   4   2   51.29    9.80
  -4   4   2   75.09    9.60
   2  -4  -2  655.63   19.90
   2  -4  -2  674.63   27.60
   2   4  -2  663.53   23.40
  -2   4   2  656.33   27.40
   2   4  -2  678.13   20.20
  -2   4   2  613.54   20.50
   2   4  -2  707.33   24.60
  -2   4   2  678.23   23.10
  -2   4   2  669.93   22.30
   0  -4   2  960.50   28.70
   0  -4  -2  960.30   34.10
   0   4   2 1007.60   28.10
   0   4  -2  996.50   27.60
   0   4  -2 1009.50   25.90
   0   4  -2  997.80   28.10
   0   4  -2 1021.00   25.40
   0   4   2 1008.20   35.10
   0   4   2 1043.10   29.80
   2  -4   2 1151.08   30.60
  -2  -4  -2 1065.59   37.60
  -2   4  -2 1137.89   29.20
  -2   4  -2 1099.99   27.60
  -2   4  -2 1158.68   28.00
  -2   4  -2 1061.49   29.80
   2   4   2 1124.09   32.10
   2   4   2 1112.69   30.10
  -4  -4  -2 1130.99   42.30
   4  -4   2 1154.78   30.70
   4   4   2 1106.49   31.10
  -4   4  -2 1092.89   33.10
   4   4   2 1122.19   33.60
  -4   4  -2 1086.99   29.00
  -4   4  -2 1138.19   29.00
  -4   4  -2 1101.59   26.20
   6  -4   2   33.50    9.90
   6  -4   2   19.20    9.40
  -6  -4  -2   24.30   18.60
  -6   4  -2   31.30   11.20
  -6   4  -2   41.60    9.40
  -6   4  -2   48.20    9.00
  -6   4  -2   47.90   11.20
   6   4   2   27.20   10.30
   6   4   2   37.60   10.00
   8  -4   2   11.50    9.40
  -8  -4  -2   18.70   20.80
   8  -4   2   22.30   10.40
   8   4   2   17.50    9.70
   8   4   2   23.70   11.90
  -8   4  -2   22.90    9.60
  -8   4  -2   15.60   12.00
  -8   4  -2   29.60   12.20
 -10  -4  -2  735.03   46.50
  10  -4   2  684.23   29.00
  10  -4   2  743.83   29.20
 -10   4  -2  673.93   33.10
 -10   4  -2  709.43   35.50
 -10   4  -2  767.72   29.60
  10   4   2  750.72   29.50
  10   4   2  739.43   32.70
 -12  -4  -2  880.91   53.29
  12  -4   2  942.11   35.50
  12  -4   2  894.71   35.40
 -12   4  -2  975.10   42.00
 -12   4  -2  970.10   41.40
 -12   4  -2  955.10   35.10
  12   4   2 1001.00   35.60
  12   4   2 1025.30   30.10
  12   4   2  965.20   38.40
  14  -4   2  422.66   28.80
 -14  -4  -2  374.56   47.30
  14  -4   2  471.35   35.00
  14  -4   2  363.36   28.30
 -14   4  -2  467.95   35.30
  14   4   2  443.46   24.90
  14   4   2  402.26   29.80
  14   4   2  434.66   28.10
 -14   4  -2  425.46   34.80
 -14   4  -2  418.36   28.00
 -16  -4  -2  116.79   36.50
  16  -4   2  112.69   20.90
  16  -4   2  170.08   25.40
  16  -4   2  114.49   19.90
 -16   4  -2  152.68   21.20
 -16   4  -2  174.78   26.70
  16   4   2  159.18   18.80
  16   4   2  137.49   20.50
 -16   4  -2  182.78   29.60
  16   4   2  125.29   20.80
 -18  -4  -2   81.49   39.70
  18  -4   2   80.89   22.30
  18  -4   2  109.79   24.90
 -18   4  -2   77.19   29.10
  18   4   2   42.60   20.00
 -18   4  -2  118.09   23.00
  18   4   2   55.49   18.20
  18   4   2   58.49   20.00
 -18   4  -2   48.20   24.40
  20  -4   2   43.20   25.60
 -20  -4  -2  -29.40   41.10
  20  -4   2   61.89   23.10
  20   4   2   80.79   21.70
 -20   4  -2   49.70   26.10
  20   4   2   74.59   20.60
 -20   4  -2   36.10   31.70
  22  -4   2   17.00   26.70
  22  -4   2   -2.70   22.70
 -22  -4  -2  -88.49   38.40
  22   4   2   31.00   20.80
 -22   4  -2  -26.00   32.60
 -22   4  -2   40.60   26.70
 -24  -4  -2  -51.59   45.00
  24  -4   2   34.90   26.70
  24  -4   2   16.80   29.40
 -24   4  -2   27.00   30.30
 -24   4  -2  -25.60   35.20
  25  -5  -2   13.90   29.60
 -25  -5   2   -7.70   44.10
  25  -5  -2   -2.50   24.80
 -25   5   2   44.50   34.60
  25   5  -2   81.69   28.20
  25   5  -2   78.99   24.60
 -25   5   2   46.50   35.00
 -23  -5   2  -58.09   38.20
  23  -5  -2   14.60   23.60
  23  -5  -2   -3.90   26.50
 -23   5   2   30.10   32.90
  23   5  -2   45.60   22.20
  23   5  -2   42.60   25.80
 -23   5   2   35.80   29.80
  21  -5  -2   33.20   24.30
 -21  -5   2  -20.30   36.40
  21  -5  -2    7.40   20.60
 -21   5   2   48.00   27.10
 -21   5   2    1.30   28.20
  21   5  -2   45.10   23.10
  21   5  -2   24.20   19.90
 -19  -5   2  -13.60   31.80
  19  -5  -2    8.40   20.30
  19  -5  -2    6.10   18.50
  19   5  -2   45.00   17.30
  19   5  -2   60.89   22.30
 -19   5   2    3.70   24.90
 -19   5   2   21.80   23.00
  19   5  -2   -9.90   18.00
  17  -5  -2   14.60   15.90
  17  -5  -2    5.10   16.50
  17  -5  -2   -5.80   18.30
 -17  -5   2  -19.80   28.60
  17   5  -2   11.90   14.10
 -17   5   2   22.10   21.80
  17   5  -2   -5.30   14.70
 -17   5   2   14.40   18.30
  17   5  -2   33.80   19.20
  15  -5  -2   29.10   17.20
 -15  -5   2   73.79   29.10
  15  -5  -2   37.20   14.20
  15  -5  -2   43.10   15.90
  15   5  -2   85.39   18.90
  15   5  -2   45.60   15.00
  15   5  -2   51.99   14.20
 -15   5   2   69.29   18.90
 -15   5   2   31.80   20.30
  13  -5  -2  -23.00   12.30
 -13  -5   2   18.90   23.40
  13  -5  -2    9.30   12.00
  13  -5  -2   15.30   11.40
 -13   5   2   -8.10   14.80
  13   5  -2   12.90   13.10
 -13   5   2   15.90   14.10
  13   5  -2   16.90   11.50
  13   5  -2   -1.20   11.80
 -13   5   2    8.90   11.50
  11  -5  -2  229.88   19.60
 -11  -5   2  282.27   36.50
  11  -5  -2  204.08   20.40
  11  -5  -2  240.08   24.10
  11   5  -2  241.58   20.40
  11   5  -2  239.38   20.70
 -11   5   2  194.58   25.80
  11   5  -2  222.68   23.20
 -11   5   2  258.27   20.30
 -11   5   2  254.87   26.30
   9  -5  -2    7.40   10.50
   9  -5  -2  -23.70    9.30
   9  -5  -2    5.90   10.20
   9  -5  -2    9.80    8.60
  -9  -5   2   19.50   20.20
  -9   5   2    3.00   11.70
  -9   5   2    0.60    7.80
  -9   5   2   10.20   13.00
   9   5  -2   36.90   11.30
   9   5  -2   32.20   10.10
   9   5  -2   18.10   11.50
  -9   5   2   20.50    9.60
  -9   5   2   14.80    8.20
   7  -5  -2    6.70    9.80
  -7  -5   2   46.40   19.40
   7  -5  -2   10.20   10.30
   7  -5  -2   27.50   11.10
   7  -5  -2   13.40    8.20
   7   5  -2   46.90   12.40
   7   5  -2   37.60   12.20
  -7   5   2   23.90    9.00
  -7   5   2   23.20   12.00
  -7   5   2    7.80    8.90
  -7   5   2    6.70    8.30
   7   5  -2   42.90   10.00
  -7   5   2   14.60   13.00
   5  -5  -2   41.30   10.80
   5  -5  -2   48.40    9.00
  -5  -5   2   59.29   17.30
   5  -5  -2   80.89   15.50
   5  -5  -2   72.79   12.60
   5   5  -2   55.99   13.20
  -5   5   2   57.09    9.20
  -5   5   2   60.09   10.50
  -5   5   2   73.79   15.20
   5   5  -2   42.70    9.50
  -5   5   2   63.99   11.10
   5   5  -2   66.89   12.40
  -5   5   2   48.50   12.20
   3  -5  -2   80.69   15.40
  -3  -5   2   61.69   15.90
   3  -5  -2   67.89   14.90
   3  -5  -2   49.70    9.60
  -3   5   2   49.80   10.70
   3   5  -2   60.29   11.50
   3   5  -2   57.59   12.20
  -3   5   2   59.99   14.00
   3   5  -2   68.89    9.60
  -3   5   2   59.79   10.80
  -3   5   2   58.89   11.10
   1  -5  -2   67.99   14.80
   1   5  -2   55.99   11.30
   1   5  -2   68.69    9.00
  -1   5   2   64.79   15.00
  -1   5   2   61.19   11.20
   1   5  -2   60.59    8.90
   1   5  -2   56.09   11.40
  -1   5   2   53.09   10.60
  -1  -5  -2   19.90   13.40
   1  -5   2   -3.10    9.30
   1   5   2   13.00    8.50
  -1   5  -2    3.90    8.80
  -1   5  -2   11.20    7.60
  -1   5  -2    6.40    7.80
  -1   5  -2   20.20    7.90
   1   5   2   19.60    9.10
   3  -5   2   33.30   10.80
  -3  -5  -2   58.69   18.40
  -3   5  -2   55.59   10.40
  -3   5  -2   44.80   10.50
  -3   5  -2   55.79    9.80
   3   5   2   46.40   11.70
   3   5   2   55.89   11.90
  -3   5  -2   35.10    8.80
   5  -5   2  417.76   20.60
  -5  -5  -2  409.56   36.20
   5  -5   2  441.66   22.10
  -5   5  -2  437.16   25.50
   5   5   2  437.26   24.70
  -5   5  -2  408.26   21.30
  -5   5  -2  452.35   20.90
   5   5   2  442.66   23.50
  -5   5  -2  448.96   18.70
   7  -5   2   46.10   10.00
   7  -5   2   32.40   10.70
  -7  -5  -2   32.00   22.50
   7  -5   2   27.10   11.80
  -7   5  -2   36.30   10.00
  -7   5  -2   49.30    8.40
  -7   5  -2   40.10   13.00
  -7   5  -2   24.00   10.00
   7   5   2   42.90   11.80
   7   5   2   18.90   11.70
   9  -5   2    3.60   10.40
   9  -5   2    6.30   11.30
  -9  -5  -2  -10.80   22.30
   9   5   2    4.20   10.30
  -9   5  -2   15.60   13.00
   9   5   2   12.60   11.80
  -9   5  -2   16.20   12.60
  -9   5  -2    9.80   10.60
  11  -5   2   28.30   12.60
 -11  -5  -2   23.70   27.40
  11  -5   2    3.70   12.30
 -11   5  -2   32.50   11.90
 -11   5  -2   20.50   16.00
 -11   5  -2   25.80   14.60
  11   5   2   18.50   14.10
  11   5   2   30.10   12.90
 -13  -5  -2  131.09   33.90
  13  -5   2  110.39   17.20
  13  -5   2  105.59   19.50
  13  -5   2   79.29   16.60
 -13   5  -2  120.29   20.40
  13   5   2  137.19   19.80
  13   5   2  127.49   20.20
 -13   5  -2  121.29   23.70
  13   5   2  125.09   14.60
 -13   5  -2   88.49   16.10
 -15  -5  -2   92.89   36.70
  15  -5   2  102.99   21.20
  15  -5   2   93.79   18.50
  15  -5   2   59.49   18.40
  15   5   2   91.99   20.30
  15   5   2  164.88   18.10
 -15   5  -2   63.09   24.70
  15   5   2   88.69   19.20
 -15   5  -2   84.99   18.10
 -15   5  -2   94.29   22.70
  17  -5   2   59.09   20.00
  17  -5   2   86.99   23.40
 -17  -5  -2   30.60   37.00
  17   5   2   92.99   22.40
 -17   5  -2   75.39   21.30
  17   5   2   89.49   21.70
 -17   5  -2   79.89   26.90
 -17   5  -2   95.49   25.90
  17   5   2  118.69   18.30
  19  -5   2   56.69   25.00
  19  -5   2   25.80   23.30
 -19  -5  -2  -29.20   39.60
  19   5   2   57.49   20.40
  19   5   2   24.40   21.10
  19   5   2   31.40   20.80
 -19   5  -2   26.10   25.20
 -19   5  -2   21.20   23.60
 -19   5  -2   65.99   29.70
  21  -5   2   41.20   24.90
  21  -5   2   51.49   28.20
 -21  -5  -2   -3.70   43.90
 -21   5  -2   44.80   31.10
  21   5   2   78.89   24.10
 -21   5  -2   43.40   28.90
 -23  -5  -2   -2.70   45.60
  23  -5   2   81.29   31.30
  23  -5   2   24.80   26.30
 -23   5  -2   60.79   33.00
 -23   5  -2   88.69   38.10
  24  -6  -2   72.79   29.00
  24  -6  -2  106.99   34.30
 -24  -6   2   35.60   48.20
 -24   6   2  128.69   36.60
  24   6  -2   81.19   30.30
  24   6  -2  130.49   25.00
 -24   6   2   57.39   36.30
  22  -6  -2   48.30   24.20
 -22  -6   2   -8.00   42.50
  22  -6  -2   50.49   28.40
  22   6  -2  100.99   29.40
 -22   6   2   85.19   31.80
 -22   6   2   85.79   33.80
  22   6  -2  147.79   23.80
 -20  -6   2    1.50   38.10
  20  -6  -2   12.20   20.90
  20  -6  -2   53.69   26.80
  20   6  -2   57.59   20.40
  20   6  -2   12.20   19.50
 -20   6   2   21.70   27.30
 -20   6   2   16.50   28.40
  20   6  -2   74.89   25.30
 -18  -6   2  -13.80   34.60
  18  -6  -2  -22.10   16.60
  18  -6  -2   18.90   20.80
  18   6  -2  -25.80   16.60
  18   6  -2   21.50   21.40
 -18   6   2  -19.40   23.30
 -18   6   2   11.20   22.50
  16  -6  -2   26.30   19.00
 -16  -6   2   42.60   32.90
  16  -6  -2   38.20   19.20
  16  -6  -2   45.20   17.00
 -16   6   2   -1.80   22.30
 -16   6   2   63.49   21.60
  16   6  -2   17.50   15.90
  16   6  -2   27.30   19.50
  16   6  -2   24.90   16.30
  14  -6  -2  405.86   27.50
 -14  -6   2  354.46   46.50
  14  -6  -2  241.68   27.70
  14  -6  -2  323.37   32.10
  14   6  -2  327.47   27.10
  14   6  -2  379.86   31.90
 -14   6   2  347.77   34.40
 -14   6   2  296.77   28.40
 -14   6   2  329.57   35.00
  14   6  -2  329.47   27.10
  12  -6  -2  776.92   38.90
  12  -6  -2  755.32   27.30
  12  -6  -2  696.03   33.90
  12  -6  -2  771.22   31.20
 -12  -6   2  749.92   50.99
 -12   6   2  675.73   41.10
  12   6  -2  753.62   34.30
 -12   6   2  723.43   25.20
 -12   6   2  770.52   32.00
 -12   6   2  759.32   40.30
  12   6  -2  734.93   37.80
  12   6  -2  709.33   31.50
  10  -6  -2 1205.48   43.80
 -10  -6   2 1209.58   55.09
  10  -6  -2 1180.28   35.60
  10  -6  -2 1173.68   40.10
  10  -6  -2 1229.88   34.90
  10   6  -2 1203.98   36.10
 -10   6   2 1118.99   47.80
 -10   6   2 1224.48   33.00
  10   6  -2 1170.78   41.10
 -10   6   2 1199.28   45.70
 -10   6   2 1215.08   36.40
 -10   6   2 1147.99   37.00
  10   6  -2 1229.78   45.10
   8  -6  -2 1192.88   34.60
   8  -6  -2 1170.78   38.50
   8  -6  -2 1110.69   39.70
  -8  -6   2 1194.38   50.39
   8  -6  -2 1203.98   33.20
   8   6  -2 1121.69   39.00
  -8   6   2 1201.78   33.40
  -8   6   2 1153.28   33.10
   8   6  -2 1105.19   41.10
   8   6  -2 1181.08   33.50
  -8   6   2 1149.29   45.20
  -8   6   2 1190.18   36.50
  -8   6   2 1176.98   42.40
   6  -6  -2  698.93   24.20
   6  -6  -2  742.03   30.50
  -6  -6   2  700.63   39.60
   6  -6  -2  724.63   35.00
   6  -6  -2  654.03   29.90
  -6   6   2  710.13   27.40
   6   6  -2  706.13   31.10
  -6   6   2  727.83   28.70
  -6   6   2  667.33   24.00
  -6   6   2  698.33   35.30
   6   6  -2  688.33   32.50
   6   6  -2  716.03   25.10
  -6   6   2  673.43   31.30
  -4  -6   2  128.99   22.40
   4  -6  -2  132.49   19.80
   4  -6  -2  127.39   17.40
   4  -6  -2  104.59   13.50
   4   6  -2  133.89   16.50
  -4   6   2  162.28   18.00
  -4   6   2  141.49   16.70
   4   6  -2  118.59   17.00
  -4   6   2  103.49   14.40
   4   6  -2  166.28   15.80
  -4   6   2  148.69   22.40
  -2  -6   2  212.28   24.20
   2  -6  -2  180.98   15.70
   2  -6  -2  245.28   25.20
  -2   6   2  250.97   19.70
  -2   6   2  239.08   20.10
  -2   6   2  220.48   24.90
   2   6  -2  254.97   17.50
   2   6  -2  206.68   20.20
   2   6  -2  233.08   20.60
  -2   6   2  214.78   17.60
   0  -6  -2 1064.39   42.00
   0  -6   2  978.50   35.30
   0   6   2  995.10   42.60
   0   6  -2 1017.30   29.70
   0   6   2  994.00   34.00
   0   6   2  995.10   35.20
   0   6  -2  958.50   29.00
   0   6  -2  983.90   34.00
   0   6  -2  952.80   34.40
  -2  -6  -2 1768.72   55.79
   2  -6   2 1770.12   47.00
  -2   6  -2 1782.92   45.50
   2   6   2 1686.23   47.90
  -2   6  -2 1765.42   41.10
  -2   6  -2 1791.62   44.60
   2   6   2 1806.52   46.80
  -2   6  -2 1698.13   43.00
  -4  -6  -2  144.89   25.70
   4  -6   2  141.59   16.80
   4   6   2  190.98   20.70
  -4   6  -2  173.08   17.80
  -4   6  -2  163.08   16.30
  -4   6  -2  163.08   17.90
   4   6   2  174.58   20.10
  -4   6  -2  177.48   20.50
   6  -6   2  189.18   20.30
   6  -6   2  146.99   17.50
  -6  -6  -2  171.08   30.00
   6  -6   2  149.49   16.40
  -6   6  -2  189.28   15.70
  -6   6  -2  191.68   18.10
  -6   6  -2  182.88   21.60
  -6   6  -2  171.48   16.70
   6   6   2  195.08   21.40
   6   6   2  186.38   21.00
  -6   6  -2  190.68   23.10
  -8  -6  -2  128.49   28.80
   8  -6   2   98.09   15.20
   8  -6   2  123.09   16.50
   8  -6   2  114.49   14.20
   8   6   2  114.59   18.50
  -8   6  -2   99.09   14.40
  -8   6  -2  105.59   14.30
  -8   6  -2   93.89   17.30
   8   6   2  114.59   17.10
  -8   6  -2  101.09   11.90
  -8   6  -2  101.39   18.00
  10  -6   2  436.06   26.50
  10  -6   2  361.66   22.50
  10  -6   2  452.85   26.70
 -10  -6  -2  414.96   46.90
 -10   6  -2  399.96   32.50
 -10   6  -2  348.57   29.90
  10   6   2  377.96   27.90
 -10   6  -2  431.66   26.40
  10   6   2  400.66   30.10
  12  -6   2  579.94   38.50
 -12  -6  -2  610.24   57.09
  12  -6   2  639.44   32.60
  12  -6   2  672.03   34.00
  12   6   2  591.34   33.90
 -12   6  -2  646.34   33.40
 -12   6  -2  538.65   39.40
 -12   6  -2  639.44   40.20
  12   6   2  594.44   36.50
  14  -6   2  550.64   40.60
 -14  -6  -2  597.54   62.29
  14  -6   2  554.84   35.10
  14  -6   2  578.54   33.30
 -14   6  -2  567.84   35.50
 -14   6  -2  587.44   42.50
 -14   6  -2  561.84   41.40
  14   6   2  546.35   38.00
  14   6   2  566.74   35.80
  16  -6   2  378.46   34.70
 -16  -6  -2  305.87   50.59
  16  -6   2  432.76   40.70
  16   6   2  350.66   32.90
 -16   6  -2  397.96   40.30
 -16   6  -2  407.86   41.40
  16   6   2  301.27   35.00
 -16   6  -2  320.07   34.40
  18  -6   2   97.59   26.60
 -18  -6  -2   58.29   44.20
  18  -6   2   62.89   23.10
 -18   6  -2   92.69   30.20
  18   6   2   77.29   22.30
  18   6   2  100.19   25.40
 -18   6  -2  111.49   28.90
 -18   6  -2   99.49   25.10
  20  -6   2   53.39   28.00
 -20  -6  -2   -1.10   43.80
  20  -6   2   39.40   24.80
  20   6   2   34.50   21.80
 -20   6  -2   52.39   31.30
 -20   6  -2   21.00   26.40
 -20   6  -2   70.59   29.40
  20   6   2   63.39   25.20
  22  -6   2   40.20   30.90
 -22  -6  -2  -41.00   43.50
  22  -6   2   61.79   26.70
 -22   6  -2   46.30   35.90
 -22   6  -2   42.50   31.60
 -23  -7   2  -20.60   45.80
  23  -7  -2   61.59   30.50
  23  -7  -2   49.70   25.50
 -23   7   2   47.00   31.30
 -23   7   2   37.60   33.40
  23   7  -2   28.90   28.30
  21  -7  -2   -3.70   26.80
 -21  -7   2  -76.59   38.80
  21  -7  -2   13.90   24.00
 -21   7   2   23.40   29.10
  21   7  -2   34.70   21.90
  21   7  -2   42.50   26.50
 -21   7   2   25.10   28.20
  21   7  -2   39.10   21.40
  19  -7  -2  -21.60   19.40
 -19  -7   2  -12.40   40.30
  19  -7  -2  -31.20   22.90
  19   7  -2  -20.60   19.80
 -19   7   2   10.30   27.40
  19   7  -2  -25.60   19.10
  19   7  -2    8.20   23.80
 -19   7   2  -13.30   25.80
  17  -7  -2  -10.20   20.80
  17  -7  -2    6.10   18.40
 -17  -7   2  -35.90   35.50
  17   7  -2  -16.60   17.80
 -17   7   2  -15.80   23.10
  17   7  -2  -30.00   19.70
  17   7  -2   -2.40   21.40
 -17   7   2   22.10   25.00
  15  -7  -2  153.38   21.60
  15  -7  -2  131.59   23.20
 -15  -7   2  168.38   40.30
  15  -7  -2  126.59   25.10
 -15   7   2  153.78   30.20
  15   7  -2  123.49   21.80
  15   7  -2  107.49   24.00
 -15   7   2  102.69   25.50
  15   7  -2  137.69   24.90
 -15   7   2  157.68   23.90
  13  -7  -2  647.24   36.70
  13  -7  -2  727.23   42.30
  13  -7  -2  745.03   33.40
 -13  -7   2  699.33   56.69
  13  -7  -2  725.13   33.80
 -13   7   2  669.13   34.00
  13   7  -2  651.63   36.90
  13   7  -2  695.03   34.30
 -13   7   2  688.23   44.10
 -13   7   2  753.62   44.70
  13   7  -2  659.23   40.60
  11  -7  -2  969.80   35.30
  11  -7  -2  934.61   43.10
  11  -7  -2  948.01   34.80
 -11  -7   2  860.01   55.99
  11  -7  -2  882.01   39.40
  11   7  -2  893.51   42.60
 -11   7   2  932.01   36.40
 -11   7   2  921.71   47.70
  11   7  -2  922.71   35.00
 -11   7   2  943.71   32.70
 -11   7   2  954.10   35.70
 -11   7   2  999.00   46.00
  11   7  -2  976.00   40.50
   9  -7  -2 1122.89   35.70
   9  -7  -2 1114.69   50.49
   9  -7  -2 1143.69   43.40
   9  -7  -2 1137.69   37.20
   9  -7  -2 1030.50   40.70
  -9  -7   2 1078.49   54.99
   9   7  -2 1087.39   41.50
  -9   7   2 1082.29   48.40
  -9   7   2 1101.39   35.80
  -9   7   2 1142.89   46.00
   9   7  -2 1031.70   43.60
  -9   7   2 1166.68   35.90
   9   7  -2 1057.99   35.10
  -9   7   2 1098.19   38.40
   7  -7  -2  385.86   27.80
   7  -7  -2  419.36   32.60
  -7  -7   2  373.66   39.10
   7  -7  -2  414.36   28.70
   7  -7  -2  358.86   22.50
   7  -7  -2  398.16   24.80
  -7   7   2  424.56   26.40
  -7   7   2  345.37   22.80
  -7   7   2  412.76   33.00
  -7   7   2  419.36   25.10
   7   7  -2  435.76   23.50
   7   7  -2  424.96   27.70
  -7   7   2  384.46   29.30
   7   7  -2  339.87   29.10
   5  -7  -2  235.48   23.20
   5  -7  -2  281.47   28.40
  -5  -7   2  252.87   31.40
   5  -7  -2  243.48   21.60
  -5   7   2  261.27   23.40
   5   7  -2  273.47   23.30
  -5   7   2  274.67   28.20
  -5   7   2  271.77   22.10
   5   7  -2  268.67   19.20
  -5   7   2  259.67   21.00
   5   7  -2  223.48   24.40
  -3  -7   2   28.70   17.20
   3  -7  -2   40.10   10.00
   3  -7  -2   27.20   16.50
   3  -7  -2   24.50   15.80
  -3   7   2   27.80   12.30
  -3   7   2   41.20   11.80
  -3   7   2   48.90   11.10
   3   7  -2   33.60   10.20
   3   7  -2   28.10   11.60
   3   7  -2   44.40   13.10
  -3   7   2   39.50   16.20
  -1  -7   2  319.27   26.50
   1  -7  -2  278.27   29.20
  -1   7   2  265.07   22.90
  -1   7   2  299.87   30.70
  -1   7   2  305.07   23.20
   1   7  -2  281.97   23.40
   1   7  -2  312.97   20.40
   1   7  -2  323.17   23.70
   1  -7   2  366.16   26.10
  -1  -7  -2  393.86   32.80
  -1   7  -2  399.46   22.60
   1   7   2  421.86   26.80
  -1   7  -2  439.16   24.80
  -1   7  -2  376.46   25.90
   1   7   2  392.46   26.10
  -1   7  -2  418.66   22.50
   3  -7   2  785.12   33.60
  -3  -7  -2  708.93   43.60
   3   7   2  776.02   33.70
  -3   7  -2  774.52   32.30
  -3   7  -2  773.82   30.90
  -3   7  -2  749.92   31.50
  -3   7  -2  759.62   29.50
   3   7   2  733.33   34.30
  -5  -7  -2   55.29   23.50
   5  -7   2   23.60   14.50
   5  -7   2   46.30   16.10
  -5   7  -2   46.40   11.90
  -5   7  -2   38.00   13.90
  -5   7  -2   44.60   12.20
   5   7   2   33.60   14.30
   5   7   2   52.69   15.10
  -5   7  -2   28.90   13.00
   7  -7   2   36.50   14.30
   7  -7   2   24.00   17.20
  -7  -7  -2   16.20   24.90
   7  -7   2   35.30   15.30
   7  -7   2   17.10   12.40
   7   7   2   21.30   14.50
  -7   7  -2   17.20   12.40
   7   7   2   -5.50   14.00
  -7   7  -2   23.50   13.50
  -7   7  -2   40.70   15.80
  -7   7  -2   38.20   11.70
  -7   7  -2   13.00   14.80
   9  -7   2  180.68   21.30
  -9  -7  -2  139.59   34.40
   9  -7   2  118.39   17.20
   9  -7   2  124.59   18.30
   9   7   2  138.99   22.70
  -9   7  -2  140.99   18.40
   9   7   2  161.68   22.90
  -9   7  -2  125.39   15.40
  -9   7  -2  113.89   18.00
  -9   7  -2  124.39   22.10
  -9   7  -2  147.39   21.70
  11  -7   2  447.36   37.30
  11  -7   2  501.25   32.10
  11  -7   2  439.76   32.20
 -11  -7  -2  448.46   56.99
  11   7   2  420.76   35.90
 -11   7  -2  397.26   36.50
 -11   7  -2  418.06   31.80
 -11   7  -2  469.05   38.60
  11   7   2  456.15   33.90
  13  -7   2  356.26   33.00
  13  -7   2  324.97   37.60
  13  -7   2  338.27   31.70
 -13  -7  -2  321.67   50.39
 -13   7  -2  350.66   36.70
 -13   7  -2  363.96   40.20
  13   7   2  288.57   34.30
 -13   7  -2  342.17   32.80
  13   7   2  352.36   33.00
  15  -7   2  355.36   34.80
  15  -7   2  351.56   39.80
 -15  -7  -2  242.58   50.49
 -15   7  -2  405.76   38.70
  15   7   2  330.77   36.30
 -15   7  -2  385.46   41.80
  15   7   2  345.97   34.30
 -15   7  -2  322.77   35.40
 -17  -7  -2   38.00   44.90
  17  -7   2   74.59   27.70
  17  -7   2   77.09   23.80
 -17   7  -2  103.49   29.30
 -17   7  -2  119.69   29.80
  17   7   2   57.39   23.30
  17   7   2   71.99   25.20
 -17   7  -2  103.49   25.30
 -19  -7  -2  -13.60   45.50
  19  -7   2   29.60   26.40
  19  -7   2   73.99   25.90
  19   7   2   79.29   26.30
  19   7   2   51.09   25.20
 -19   7  -2   51.89   28.20
 -19   7  -2   49.80   26.00
 -19   7  -2   78.99   38.90
  21  -7   2  -39.00   24.30
 -21  -7  -2  -83.69   46.30
  21  -7   2    6.60   26.80
 -21   7  -2   -2.00   28.10
  21   7   2   27.00   40.30
  21   7   2  -18.90   22.50
 -21   7  -2    0.00   26.70
  22  -8  -2   21.70   24.70
  22  -8  -2   35.70   28.50
 -22  -8   2  -80.59   43.80
 -22   8   2  154.78   35.90
  22   8  -2   45.90   28.20
 -22   8   2   17.80   29.60
 -20  -8   2  -21.90   43.60
  20  -8  -2   -9.10   22.80
  20  -8  -2   61.59   28.40
  20   8  -2   57.19   28.30
  20   8  -2   49.60   23.40
 -20   8   2   57.69   30.20
 -20   8   2   32.40   30.50
  18  -8  -2  140.69   30.50
  18  -8  -2  117.89   25.90
 -18  -8   2   61.09   44.70
  18   8  -2  121.09   29.50
  18   8  -2  142.49   30.80
  18   8  -2  128.89   26.80
 -18   8   2  156.58   33.40
 -18   8   2  179.18   35.50
  16  -8  -2   54.39   25.00
  16  -8  -2  115.29   34.50
 -16  -8   2   17.70   41.20
  16  -8  -2   26.50   21.00
 -16   8   2  126.89   30.10
  16   8  -2   36.70   22.90
 -16   8   2   78.69   29.40
  16   8  -2   62.29   20.80
 -16   8   2   68.59   23.00
  16   8  -2   52.69   25.40
 -14  -8   2   96.39   40.70
  14  -8  -2  102.49   21.90
  14  -8  -2   30.30   18.50
  14  -8  -2   74.49   24.90
  14   8  -2   59.09   22.50
 -14   8   2  119.89   28.40
  14   8  -2   66.19   22.80
  14   8  -2   79.69   18.90
 -14   8   2   38.20   25.30
 -14   8   2   88.39   21.20
  12  -8  -2   50.39   18.80
 -12  -8   2    6.00   33.90
  12  -8  -2   27.30   17.50
  12  -8  -2   36.10   16.10
  12  -8  -2    6.70   18.70
  12   8  -2   50.59   16.30
 -12   8   2   83.59   23.90
 -12   8   2   47.10   17.20
 -12   8   2   49.50   16.20
  12   8  -2   10.80   18.40
 -12   8   2   42.10   16.90
  12   8  -2   26.10   18.90
 -12   8   2   46.80   21.70
  10  -8  -2   48.10   22.40
  10  -8  -2   39.30   17.00
 -10  -8   2   52.19   30.70
  10  -8  -2   44.10   15.40
  10  -8  -2   37.70   17.40
  10  -8  -2   37.80   17.80
  10   8  -2   42.60   18.30
 -10   8   2   34.80   15.00
 -10   8   2   70.69   19.80
  10   8  -2   59.19   17.50
 -10   8   2   22.50   14.90
 -10   8   2   46.40   15.80
  10   8  -2   52.09   15.20
 -10   8   2   75.39   23.10
   8  -8  -2   79.19   19.70
   8  -8  -2   52.59   17.10
   8  -8  -2   29.00   23.10
   8  -8  -2   86.49   14.70
  -8  -8   2   54.99   27.50
   8  -8  -2   94.79   18.00
  -8   8   2   82.49   17.50
  -8   8   2   60.79   16.80
  -8   8   2   96.99   15.40
   8   8  -2   81.79   17.60
  -8   8   2   66.09   24.10
   8   8  -2   65.19   15.80
  -8   8   2   76.19   18.30
   8   8  -2   66.89   18.30
   6  -8  -2  223.38   20.20
  -6  -8   2  204.48   30.40
   6  -8  -2  187.18   22.70
   6  -8  -2  231.98   24.20
   6  -8  -2  236.18   32.10
  -6   8   2  200.18   23.70
  -6   8   2  186.28   21.60
  -6   8   2  243.68   26.50
   6   8  -2  225.78   21.70
   6   8  -2  175.68   22.70
  -6   8   2  260.47   20.60
  -6   8   2  260.87   32.30
   6   8  -2  231.38   24.50
  -4  -8   2   75.59   22.30
   4  -8  -2   57.69   12.60
   4  -8  -2   41.00   16.60
   4  -8  -2   68.69   20.30
  -4   8   2   64.29   14.70
   4   8  -2   61.89   16.40
  -4   8   2   53.59   14.30
   4   8  -2   47.40   12.80
   4   8  -2   63.39   15.00
  -4   8   2   49.10   16.00
  -4   8   2   72.39   21.60
  -2  -8   2   21.40   17.30
   2  -8  -2   31.90   17.90
   2   8  -2   21.50   13.50
   2   8  -2   36.60   12.50
   2   8  -2   26.50   13.00
  -2   8   2   18.40   19.30
  -2   8   2    8.50   13.20
  -2   8   2   26.80   12.80
   0  -8   2  116.69   18.80
   0  -8  -2  102.39   23.00
   0   8  -2  113.89   15.30
   0   8  -2  117.79   18.00
   0   8  -2  135.09   20.00
   0   8   2  105.29   18.30
   0   8   2  126.59   18.80
  -2  -8  -2   45.50   23.30
   2  -8   2   53.39   15.80
  -2   8  -2   46.70   15.20
  -2   8  -2   18.00   13.30
   2   8   2   39.10   15.40
  -2   8  -2   43.20   12.40
  -2   8  -2   69.99   14.80
   2   8   2   36.30   16.30
   4  -8   2   72.99   17.50
  -4  -8  -2   97.79   29.00
  -4   8  -2   92.19   16.90
  -4   8  -2   87.29   16.10
  -4   8  -2   71.39   16.10
  -4   8  -2   92.79   17.90
   4   8   2   94.89   19.70
   4   8   2   79.09   17.50
   6  -8   2  102.09   22.30
   6  -8   2   73.19   20.10
   6  -8   2   90.49   18.70
   6  -8   2   46.90   17.30
  -6  -8  -2   76.19   30.60
  -6   8  -2   53.99   18.60
  -6   8  -2   60.49   16.60
   6   8   2   75.09   20.20
  -6   8  -2   91.29   19.00
  -6   8  -2  121.39   16.70
   6   8   2   88.09   20.20
   8  -8   2   69.59   21.90
   8  -8   2  146.79   21.20
   8  -8   2  128.29   21.20
  -8  -8  -2  110.79   36.60
  -8   8  -2  122.39   23.50
   8   8   2  137.49   23.80
  -8   8  -2   67.49   20.20
  -8   8  -2  194.98   22.60
   8   8   2  119.89   22.10
  -8   8  -2  145.99   22.70
  -8   8  -2  149.88   21.00
  10  -8   2   65.49   21.60
 -10  -8  -2   95.39   37.70
  10  -8   2   65.59   22.20
  10  -8   2   81.09   19.50
 -10   8  -2   86.99   19.40
 -10   8  -2  100.09   23.10
  10   8   2   59.19   19.60
  10   8   2   74.49   21.40
 -10   8  -2   69.29   22.90
 -10   8  -2   76.69   20.10
  12  -8   2   52.29   22.10
 -12  -8  -2   41.60   40.50
  12  -8   2   74.09   20.40
  12  -8   2   26.80   20.20
 -12   8  -2   56.89   20.70
 -12   8  -2   46.10   24.00
  12   8   2   44.80   22.80
 -12   8  -2   73.19   23.00
  12   8   2   80.49   22.90
 -14  -8  -2    1.80   40.30
  14  -8   2    9.50   21.60
  14  -8   2   15.60   26.60
  14  -8   2   40.40   20.50
 -14   8  -2   22.10   24.90
  14   8   2   27.50   21.00
 -14   8  -2   31.10   20.70
 -14   8  -2   32.50   23.00
  14   8   2   22.60   21.70
 -16  -8  -2  -16.90   45.90
  16  -8   2   37.10   21.50
  16  -8   2  -13.70   23.60
  16   8   2   21.10   21.90
 -16   8  -2   14.50   21.40
 -16   8  -2   -1.30   25.70
  16   8   2    3.60   21.90
  18  -8   2   25.40   26.30
 -18  -8  -2  -40.50   47.40
  18  -8   2   20.60   23.40
 -18   8  -2  -24.60   22.90
  18   8   2    5.70   22.70
  18   8   2   37.80   25.60
 -20  -8  -2    3.80   51.69
  20  -8   2   50.69   29.70
  20  -8   2   14.70   26.60
 -20   8  -2  -22.60   26.60
  20   8   2   26.60   25.30
  20   8   2   66.39   27.70
 -20   8  -2   28.90   29.40
 -21  -9   2   23.50   49.10
  21  -9  -2  107.09   33.00
  21  -9  -2  111.29   27.70
  21   9  -2  159.18   34.30
 -21   9   2  185.88   39.00
  21   9  -2  116.99   29.40
 -21   9   2   75.79   34.30
  19  -9  -2  189.38   28.90
  19  -9  -2  284.17   37.60
 -19   9   2  304.87   45.40
  19   9  -2  334.47   38.50
 -19   9   2  295.27   39.50
  19   9  -2  257.77   37.90
 -17  -9   2   20.60   45.30
  17  -9  -2   88.99   24.60
  17  -9  -2   79.79   27.30
  17   9  -2   95.09   25.20
 -17   9   2   88.49   26.40
 -17   9   2   99.39   31.60
  17   9  -2   93.39   28.80
 -17   9   2  149.99   32.40
 -15  -9   2  -45.50   41.40
  15  -9  -2    8.60   22.00
  15  -9  -2   60.49   26.90
  15  -9  -2   26.10   20.60
  15   9  -2    2.20   23.70
 -15   9   2   21.30   20.90
  15   9  -2   35.00   21.20
 -15   9   2   36.10   25.50
 -15   9   2   42.80   25.00
  13  -9  -2   15.80   20.20
 -13  -9   2  -25.40   38.60
  13  -9  -2   -5.10   28.00
  13  -9  -2   22.80   19.60
  13  -9  -2   20.30   19.10
  13   9  -2   24.40   22.90
 -13   9   2   33.10   23.00
  13   9  -2   -4.30   17.30
 -13   9   2   40.90   25.70
 -13   9   2   19.50   18.30
  13   9  -2   24.20   20.40
 -13   9   2   21.30   16.30
  11  -9  -2  167.58   25.10
 -11  -9   2  133.29   39.90
  11  -9  -2  180.48   31.30
  11  -9  -2  139.49   20.70
  11  -9  -2  189.68   24.10
  11  -9  -2  132.29   24.20
  11   9  -2  164.28   20.50
 -11   9   2  161.38   20.40
  11   9  -2  135.49   26.00
 -11   9   2  137.69   20.40
 -11   9   2  200.58   32.70
 -11   9   2  154.38   25.70
  11   9  -2  119.59   23.70
 -11   9   2  145.59   20.80
   9  -9  -2  -23.70   13.60
   9  -9  -2  -10.40   15.80
   9  -9  -2  -17.50   17.20
  -9  -9   2  -12.10   30.20
   9  -9  -2  -21.10   15.20
   9  -9  -2  -10.40   22.70
  -9   9   2  -18.80   20.90
  -9   9   2  -12.30   14.40
  -9   9   2    1.90   16.60
   9   9  -2  -32.00   15.40
   9   9  -2  -16.50   14.30
  -9   9   2   -5.30   13.90
   9   9  -2  -13.50   17.10
  -9   9   2  -15.10   14.00
   7  -9  -2   91.49   21.80
  -7  -9   2   99.99   30.70
   7  -9  -2   95.09   20.30
   7  -9  -2   76.69   26.80
   7  -9  -2   76.59   17.90
   7  -9  -2  101.19   16.30
  -7   9   2   97.39   26.30
   7   9  -2   96.19   21.40
   7   9  -2   95.09   20.50
  -7   9   2   73.49   19.10
  -7   9   2   66.29   19.40
  -7   9   2   94.69   20.60
  -7   9   2   83.59   15.40
   7   9  -2   85.29   16.90
   5  -9  -2  118.69   27.40
  -5  -9   2  162.48   28.60
   5  -9  -2  125.69   22.30
   5  -9  -2  220.78   24.20
   5   9  -2  156.78   18.90
  -5   9   2  160.08   28.80
  -5   9   2  127.49   21.20
  -5   9   2  131.09   19.50
   5   9  -2  161.48   23.40
  -5   9   2  158.28   22.20
   5   9  -2  157.28   21.30
   3  -9  -2   54.89   24.30
   3  -9  -2   88.39   22.90
  -3  -9   2   75.09   24.70
   3   9  -2   90.09   19.90
   3   9  -2   49.60   15.80
  -3   9   2   57.79   18.80
  -3   9   2   73.29   18.80
   3   9  -2   42.50   15.40
  -3   9   2   84.79   26.80
   1  -9  -2  638.94   45.40
  -1  -9   2  751.92   38.30
  -1  -9   2  748.53   41.90
   1   9  -2  669.53   37.20
  -1   9   2  731.33   38.40
   1   9  -2  737.73   32.80
   1   9  -2  721.93   38.00
  -1   9   2  669.23   38.60
   1  -9   2  914.31   41.40
  -1  -9  -2  769.42   48.80
   1  -9   2  817.62   43.30
  -1   9  -2  799.42   39.70
  -1   9  -2  833.62   34.90
  -1   9  -2  859.81   40.70
  -1   9  -2  743.83   33.20
   1   9   2  840.42   41.50
   1   9   2  776.42   41.60
   3  -9   2  524.55   34.90
  -3  -9  -2  518.65   47.80
   3   9   2  557.54   37.70
   3   9   2  503.85   36.20
  -3   9  -2  580.24   32.40
  -3   9  -2  559.14   33.70
  -3   9  -2  492.75   39.50
  -3   9  -2  533.15   33.80
  -3   9  -2  546.15   32.50
   5  -9   2  255.97   28.60
   5  -9   2  234.78   28.90
  -5  -9  -2  278.87   41.00
   5  -9   2  338.57   30.30
  -5   9  -2  282.17   28.70
   5   9   2  283.07   31.20
  -5   9  -2  307.27   30.80
  -5   9  -2  313.77   27.50
  -5   9  -2  258.37   29.80
   5   9   2  300.07   32.00
  -7  -9  -2  126.19   38.10
   7  -9   2   85.99   24.90
   7  -9   2  128.69   21.30
   7  -9   2  135.79   21.00
   7  -9   2  140.99   21.90
   7   9   2  115.29   22.60
   7   9   2  138.39   24.50
  -7   9  -2  136.89   20.10
  -7   9  -2  173.38   21.90
  -7   9  -2   88.69   22.40
  -7   9  -2  118.69   22.20
   9  -9   2   59.39   18.60
   9  -9   2   46.90   24.00
   9  -9   2   -4.60   21.20
   9  -9   2   60.59   20.20
  -9  -9  -2   41.80   37.00
   9  -9   2   80.49   26.30
   9   9   2   43.40   19.90
  -9   9  -2   12.50   18.20
   9   9   2   49.00   20.80
  -9   9  -2   31.70   21.20
  -9   9  -2   31.90   21.50
  -9   9  -2   45.20   18.80
  11  -9   2   -8.40   21.40
  11  -9   2   26.10   19.10
  11  -9   2   54.89   21.90
  11  -9   2   44.30   26.20
 -11  -9  -2   18.20   39.10
 -11   9  -2    4.90   18.20
 -11   9  -2   23.50   22.60
  11   9   2    9.30   20.50
  11   9   2   30.40   21.00
 -11   9  -2   28.40   19.50
  13  -9   2  160.48   27.80
  13  -9   2  203.68   26.80
  13  -9   2  197.88   27.70
 -13  -9  -2  160.58   48.60
 -13   9  -2  242.38   32.00
  13   9   2  222.28   30.00
  13   9   2  188.18   29.70
 -13   9  -2  232.68   28.50
 -15  -9  -2  -80.09   43.20
  15  -9   2   27.70   25.30
  15  -9   2  -14.30   22.40
  15   9   2   -7.60   23.00
  15   9   2   16.50   22.60
 -15   9  -2  -14.50   22.60
 -15   9  -2   14.70   24.60
  17  -9   2   48.70   27.90
 -17  -9  -2   57.89   52.59
  17  -9   2   45.90   25.40
 -17   9  -2   38.80   26.10
 -17   9  -2   53.59   29.20
  17   9   2   61.39   27.50
  17   9   2   65.29   26.60
  19  -9   2   58.69   31.00
 -19  -9  -2  -56.19   51.59
  19  -9   2   66.79   27.20
  19   9   2   53.69   27.30
 -19   9  -2   88.09   33.00
 -19   9  -2   42.10   28.50
  19   9   2   66.09   28.30
  20 -10  -2   92.19   27.80
 -20 -10   2  -44.90   48.80
  20 -10  -2  102.49   33.00
 -20  10   2  148.19   38.20
  20  10  -2  124.29   33.70
 -20  10   2   75.49   35.50
  20  10  -2  103.09   28.60
 -18 -10   2   19.00   48.90
  18 -10  -2   68.49   25.70
  18 -10  -2  126.89   31.30
 -18  10   2   58.29   31.30
 -18  10   2   40.90   29.80
  18  10  -2  113.89   32.50
 -18  10   2  108.29   33.50
  18  10  -2   81.69   27.50
  16 -10  -2   23.30   24.20
 -16 -10   2  -33.90   43.50
  16 -10  -2   -5.00   33.20
  16 -10  -2   14.30   20.70
 -16  10   2   44.20   27.10
  16  10  -2    5.60   22.60
  16  10  -2   17.50   25.30
 -16  10   2   -2.80   23.30
 -16  10   2    9.80   26.20
 -14 -10   2  -49.00   39.70
  14 -10  -2   16.40   18.80
  14 -10  -2   -3.60   27.00
  14 -10  -2   10.60   20.60
  14 -10  -2  -22.60   21.40
 -14  10   2    5.60   22.20
 -14  10   2   -7.90   25.50
 -14  10   2   -5.30   18.90
  14  10  -2    3.60   20.30
  14  10  -2    6.10   22.10
  12 -10  -2   41.40   22.90
  12 -10  -2   57.39   30.20
 -12 -10   2   31.50   40.30
  12 -10  -2   38.00   20.70
  12 -10  -2   58.29   19.00
 -12  10   2   45.50   18.80
  12  10  -2   29.50   20.70
 -12  10   2   77.39   23.80
  12  10  -2   34.40   22.80
 -12  10   2   73.89   29.70
 -12  10   2   36.20   18.00
  10 -10  -2   98.59   21.60
  10 -10  -2   89.09   19.70
  10 -10  -2   71.29   24.20
  10 -10  -2  104.19   22.90
  10 -10  -2   87.09   31.20
 -10 -10   2   46.90   36.70
  10  10  -2   62.39   22.60
 -10  10   2   91.49   19.30
  10  10  -2   59.79   23.10
 -10  10   2   72.79   29.20
 -10  10   2  104.59   22.20
 -10  10   2  127.29   21.20
 -10  10   2   98.49   23.00
   8 -10  -2    4.70   16.20
   8 -10  -2   27.80   16.40
   8 -10  -2    9.80   24.90
   8 -10  -2   17.00   18.30
  -8 -10   2   46.30   34.20
   8 -10  -2   18.90   20.90
   8  10  -2   -2.80   20.00
  -8  10   2   43.80   25.80
  -8  10   2   16.90   15.60
   8  10  -2   31.60   21.20
  -8  10   2   26.70   17.60
  -8  10   2   30.00   19.10
   8  10  -2    9.50   19.80
  -8  10   2   31.40   18.30
   6 -10  -2   88.89   21.30
   6 -10  -2   60.39   28.10
   6 -10  -2   36.80   17.30
   6 -10  -2   56.39   22.70
  -6 -10   2  108.29   31.40
  -6  10   2   97.59   22.10
  -6  10   2   64.99   21.10
  -6  10   2   63.09   22.00
  -6  10   2   90.89   29.20
   6  10  -2   66.29   22.40
   6  10  -2   59.69   17.60
   6  10  -2   25.20   19.40
  -4 -10   2  299.97   41.50
   4 -10  -2  246.28   31.40
   4 -10  -2  268.67   37.10
  -4  10   2  269.87   32.80
   4  10  -2  320.37   32.20
  -4  10   2  319.77   43.10
  -4  10   2  312.97   32.30
   4  10  -2  273.07   24.10
   4  10  -2  253.47   30.60
   2 -10  -2  242.78   35.90
  -2 -10   2  239.08   34.00
   2  10  -2  293.37   32.50
   2  10  -2  241.88   28.90
   2  10  -2  281.17   27.90
  -2  10   2  200.88   27.40
   0 -10   2  667.53   45.40
   0 -10   2  639.54   40.00
   0 -10  -2  624.34   50.29
   0  10   2  566.14   41.00
   0  10  -2  691.93   35.70
   0  10  -2  620.84   40.00
   0  10  -2  716.03   41.60
   0  10   2  599.54   41.50
   2 -10   2  660.53   45.50
   2 -10   2  674.53   42.40
  -2 -10  -2  663.13   53.79
   2  10   2  628.34   41.60
  -2  10  -2  657.33   39.70
  -2  10  -2  714.43   36.30
  -2  10  -2  618.84   39.50
   2  10   2  597.34   41.30
   4 -10   2  263.07   30.50
   4 -10   2  321.07   29.20
  -4 -10  -2  249.28   40.60
  -4  10  -2  343.17   29.80
  -4  10  -2  301.87   29.90
  -4  10  -2  305.57   32.60
   4  10   2  328.17   34.80
   4  10   2  266.87   31.10
  -4  10  -2  292.17   31.00
  -6 -10  -2  138.89   36.40
   6 -10   2   81.49   28.90
   6 -10   2  113.19   21.70
   6 -10   2  104.19   25.50
   6 -10   2  132.09   23.80
   6 -10   2  114.49   20.40
  -6  10  -2  150.58   22.70
   6  10   2  130.69   24.70
   6  10   2  129.49   25.60
  -6  10  -2  117.39   21.80
  -6  10  -2  125.89   23.70
  -6  10  -2   97.49   21.10
   8 -10   2    8.70   21.40
   8 -10   2    1.80   16.50
   8 -10   2  -14.90   21.20
  -8 -10  -2   10.70   33.90
   8 -10   2    8.70   18.60
   8  10   2    5.50   19.80
  -8  10  -2  -13.50   17.80
  -8  10  -2   12.60   18.90
  -8  10  -2    9.80   17.70
   8  10   2   -1.10   19.50
  10 -10   2   10.30   20.30
  10 -10   2   18.60   19.70
 -10 -10  -2   12.40   40.10
  10 -10   2    5.90   19.20
 -10  10  -2  -11.30   17.90
 -10  10  -2  -20.10   19.40
  10  10   2   18.50   20.70
 -10  10  -2   16.70   20.50
  10  10   2    2.30   21.00
  12 -10   2   93.49   24.60
  12 -10   2   90.59   26.30
 -12 -10  -2   50.29   45.90
  12 -10   2   79.99   24.20
 -12  10  -2  100.99   26.20
  12  10   2   89.19   24.90
  12  10   2   95.59   28.50
 -12  10  -2   99.19   25.20
 -12  10  -2   67.39   25.20
 -14 -10  -2    0.90   47.70
  14 -10   2   51.99   25.20
  14 -10   2   21.50   23.30
  14  10   2   27.20   24.80
 -14  10  -2   37.80   24.90
 -14  10  -2   47.20   26.10
  14  10   2  -14.00   23.90
 -16 -10  -2  -68.59   50.59
  16 -10   2   44.90   26.20
  16 -10   2   37.40   28.20
 -16  10  -2   19.00   25.90
  16  10   2   27.30   26.70
  16  10   2   -8.20   24.80
 -16  10  -2   60.59   29.60
  18 -10   2    2.60   28.60
  18 -10   2    8.10   24.90
 -18 -10  -2 -116.49   51.79
  18  10   2  -26.70   26.30
 -18  10  -2  -29.90   25.90
  18  10   2  -10.20   26.40
 -18  10  -2   21.60   31.90
  17 -11  -2   78.19   28.90
 -17 -11   2  -39.10   48.20
  17 -11  -2   37.50   25.40
  17 -11  -2   34.20   36.30
 -17  11   2   31.40   34.00
  17  11  -2   20.90   26.00
 -17  11   2   22.80   33.00
  17  11  -2   30.20   29.10
 -17  11   2   12.50   29.60
 -15 -11   2  -18.80   46.80
  15 -11  -2   18.60   34.90
  15 -11  -2   45.40   23.00
  15 -11  -2    2.00   24.10
  15  11  -2   -1.50   25.40
 -15  11   2    8.00   25.10
 -15  11   2   11.40   31.50
  15  11  -2   23.40   27.00
 -15  11   2  114.09   31.50
  13 -11  -2    9.20   19.30
 -13 -11   2    4.70   43.90
  13 -11  -2  -25.20   24.30
  13 -11  -2   15.30   30.80
  13 -11  -2   32.00   22.50
 -13  11   2   27.70   31.70
  13  11  -2    1.20   22.70
 -13  11   2   24.00   26.00
  13  11  -2   11.70   23.50
 -13  11   2   11.90   28.30
 -13  11   2   29.60   23.50
 -11 -11   2  -17.90   39.50
  11 -11  -2   -8.50   17.80
  11 -11  -2   -0.20   22.20
  11 -11  -2  -13.40   21.30
  11 -11  -2    2.50   29.80
  11  11  -2   -9.00   21.40
 -11  11   2   27.40   22.80
 -11  11   2   -7.60   27.20
  11  11  -2   -8.70   21.00
 -11  11   2    5.60   18.80
   9 -11  -2   21.00   23.40
   9 -11  -2   63.99   23.60
  -9 -11   2   68.09   38.20
   9 -11  -2   68.29   30.60
   9 -11  -2   23.90   19.80
  -9  11   2   50.29   29.30
  -9  11   2   44.60   20.90
   9  11  -2   35.40   22.20
   9  11  -2   33.20   22.40
  -9  11   2    8.60   20.30
  -7 -11   2   65.29   33.90
   7 -11  -2   24.80   21.50
   7 -11  -2   12.80   23.10
   7 -11  -2   45.60   28.70
   7  11  -2   19.80   21.80
  -7  11   2   24.60   27.90
  -7  11   2   22.70   21.20
   7  11  -2   30.40   21.70
  -7  11   2   32.10   20.00
   5 -11  -2  107.19   30.60
   5 -11  -2   91.39   25.70
  -5 -11   2  145.19   33.10
   5  11  -2   85.59   23.70
  -5  11   2   69.89   25.10
  -5  11   2   60.89   22.10
   5  11  -2   59.39   22.50
  -5  11   2   79.19   33.10
  -3 -11   2   45.90   27.30
   3 -11  -2   97.49   31.20
   3 -11  -2    2.60   25.70
   3  11  -2   26.60   21.10
   3  11  -2   97.79   24.50
  -3  11   2   57.39   22.90
  -3  11   2   60.39   22.60
   1 -11  -2   84.49   30.90
  -1 -11   2   94.69   29.90
  -1 -11   2   87.99   22.90
   1  11  -2  113.69   25.90
   1  11  -2   74.99   23.70
  -1  11   2   48.60   22.10
  -1  11   2   66.79   23.90
   1  11  -2   58.59   19.30
  -1 -11  -2   93.59   34.20
   1 -11   2  100.89   25.80
   1 -11   2  152.38   32.50
  -1  11  -2   80.89   24.10
  -1  11  -2  113.19   21.50
   1  11   2   73.79   23.60
  -1  11  -2   91.39   24.70
   1  11   2   85.79   24.00
  -3 -11  -2   17.70   33.30
   3 -11   2   62.89   24.00
  -3  11  -2   27.90   20.30
   3  11   2   33.60   22.40
  -3  11  -2   48.20   19.80
   3  11   2   39.10   22.40
  -3  11  -2   99.99   23.10
   5 -11   2   68.29   24.30
   5 -11   2  101.69   28.10
  -5 -11  -2   83.19   36.10
   5 -11   2   86.09   21.70
  -5  11  -2   65.29   22.70
   5  11   2   93.39   26.00
  -5  11  -2   66.79   21.20
  -5  11  -2   95.49   22.90
   5  11   2   70.99   25.30
  -7 -11  -2  136.59   41.60
   7 -11   2  115.29   26.20
   7 -11   2   94.09   22.80
   7 -11   2   90.49   22.30
   7 -11   2   83.69   27.60
  -7  11  -2  110.39   23.20
  -7  11  -2   77.99   24.70
  -7  11  -2  106.89   23.40
   7  11   2  100.39   27.40
  -7  11  -2  131.69   37.80
   7  11   2   55.09   24.90
  -9 -11  -2   67.19   43.20
   9 -11   2   37.20   24.90
   9 -11   2   19.90   21.20
   9 -11   2   79.59   22.80
  -9  11  -2   84.59   23.30
  -9  11  -2  -25.90   20.90
   9  11   2  103.39   27.70
   9  11   2   21.60   25.10
  -9  11  -2   31.30   22.20
  11 -11   2    8.10   22.70
 -11 -11  -2   27.00   43.50
  11 -11   2    8.20   24.20
  11 -11   2   27.40   22.40
  11  11   2   35.90   25.00
 -11  11  -2   37.70   23.20
  11  11   2   14.30   23.80
 -11  11  -2   38.80   23.90
 -11  11  -2    3.80   22.40
  13 -11   2   36.30   24.50
 -13 -11  -2  -55.69   44.70
  13 -11   2   15.60   25.80
  13  11   2    7.20   25.20
  13  11   2   20.20   26.10
 -13  11  -2    6.60   24.50
 -13  11  -2   36.00   27.50
  15 -11   2   32.20   27.40
 -15 -11  -2  -41.60   48.80
  15 -11   2    9.20   25.30
  15  11   2   13.20   27.30
  15  11   2   -1.20   25.90
 -15  11  -2   26.40   27.80
 -15  11  -2   -5.40   28.50
 -16 -12   2  -68.59   49.90
  16 -12  -2   13.60   26.90
  16  12  -2   49.90   30.30
  16  12  -2    4.80   26.70
 -16  12   2   91.09   33.30
  14 -12  -2   70.49   27.10
  14 -12  -2   66.69   38.70
 -14 -12   2  -70.59   46.60
  14  12  -2   49.50   27.50
 -14  12   2   93.99   45.40
 -14  12   2   85.29   32.00
  14  12  -2  100.19   32.00
 -12 -12   2   35.90   46.30
  12 -12  -2  140.39   39.60
  12 -12  -2   43.30   29.60
  12  12  -2   71.79   30.60
 -12  12   2   55.09   36.60
 -12  12   2   31.70   34.20
  12  12  -2  120.99   29.80
 -10 -12   2  109.49   43.80
  10 -12  -2   81.69   43.90
  10 -12  -2  121.69   35.90
  10 -12  -2  119.29   29.60
  10  12  -2  135.89   28.90
 -10  12   2  114.79   26.10
  10  12  -2   90.89   30.30
 -10  12   2  109.89   36.70
   8 -12  -2  111.49   33.20
   8 -12  -2   32.60   26.30
   8 -12  -2   28.40   24.50
  -8 -12   2   75.69   39.40
  -8  12   2   47.00   23.40
  -8  12   2   51.09   23.70
   8  12  -2   33.30   24.60
  -8  12   2   75.99   33.00
   8  12  -2   37.50   23.70
   6 -12  -2   90.19   27.70
  -6 -12   2  114.89   36.60
   6 -12  -2  151.48   33.00
   6 -12  -2  118.19   28.80
  -6  12   2   97.29   24.90
   6  12  -2  106.79   26.50
  -6  12   2   76.59   27.80
  -6  12   2   96.19   36.30
   6  12  -2   91.89   25.80
   4 -12  -2   52.69   29.70
  -4 -12   2   64.99   37.60
   4 -12  -2    2.40   24.40
   4  12  -2    7.50   21.50
  -4  12   2   29.30   21.40
  -4  12   2    1.20   23.70
   4  12  -2   39.00   23.60
   2 -12  -2  -43.10   24.10
   2 -12  -2   37.20   29.20
  -2 -12   2   48.90   23.20
   2  12  -2  -17.90   22.20
  -2  12   2    6.90   21.80
   2  12  -2  -15.50   19.70
  -2  12   2   10.60   20.80
   0 -12   2   36.20   23.40
   0 -12  -2   55.89   31.30
   0  12  -2   -5.70   21.30
   0  12   2   77.39   25.00
   0  12  -2   -7.30   20.00
   0  12   2    0.70   21.20
   2 -12   2   41.10   23.70
  -2 -12  -2   54.29   34.30
  -2  12  -2   44.70   22.00
   2  12   2   37.10   23.20
  -2  12  -2   19.80   21.30
   2  12   2   32.80   25.70
   4 -12   2   22.70   21.50
  -4 -12  -2   37.60   35.10
   4 -12   2    0.30   24.30
   4 -12   2   23.00   25.40
  -4  12  -2   18.90   20.30
   4  12   2    3.00   24.40
   4  12   2   20.70   22.20
  -4  12  -2   11.30   21.50
  -4  12  -2    9.80   20.90
   6 -12   2   -9.40   26.20
   6 -12   2   16.90   21.50
  -6 -12  -2  101.19   39.20
   6 -12   2   24.00   25.80
  -6  12  -2   34.60   22.30
   6  12   2   28.80   26.10
  -6  12  -2   11.70   22.50
   6  12   2   41.10   25.10
  -6  12  -2   41.90   30.80
  -8 -12  -2  102.39   44.80
   8 -12   2   66.69   30.20
   8 -12   2   54.89   24.10
  -8  12  -2   54.09   24.40
  -8  12  -2    9.00   25.00
   8  12   2   29.60   28.00
   8  12   2   31.40   25.30
  10 -12   2   91.09   28.50
  10 -12   2   90.79   26.20
 -10 -12  -2  165.58   50.49
  10 -12   2   78.59   29.50
  10  12   2  136.29   33.00
 -10  12  -2   52.19   27.10
  10  12   2   91.99   30.80
 -10  12  -2  101.39   28.70
  12 -12   2   93.69   29.20
  12 -12   2   85.29   30.50
 -12 -12  -2  110.29   51.69
 -12  12  -2   90.59   29.80
 -12  12  -2   79.89   31.30
  12  12   2  104.19   31.70
  12  12   2   91.99   31.40
 -14 -12  -2    2.40   53.29
  14 -12   2   32.20   28.80
  14 -12   2   90.09   30.10
  14  12   2   84.09   33.00
  14  12   2   56.69   30.00
 -14  12  -2   91.19   30.30
 -14  12  -2   65.19   30.30
 -13 -13   2   -5.70   49.00
  13  13  -2   44.30   29.60
  13  13  -2   65.09   27.90
 -11 -13   2   80.19   62.99
  11 -13  -2   94.09   35.70
  11  13  -2  135.29   31.30
  11  13  -2  165.38   34.00
   9 -13  -2  116.79   36.50
   9 -13  -2   84.49   34.10
   9 -13  -2   92.99   30.00
   9  13  -2  106.89   31.50
   9  13  -2   86.89   28.70
  -9  13   2  100.19   28.40
  -9  13   2   88.89   46.30
   7 -13  -2  104.49   34.90
   7 -13  -2   47.20   28.60
   7 -13  -2   29.00   27.80
   7  13  -2   68.89   28.30
  -7  13   2   40.60   24.80
  -7  13   2   38.80   39.80
  -7  13   2   59.59   26.00
   7  13  -2   52.19   28.10
   5 -13  -2   66.39   27.00
   5 -13  -2   68.99   31.20
   5 -13  -2   30.10   27.80
  -5  13   2   31.50   26.50
   5  13  -2   40.40   26.10
   5  13  -2  -10.10   24.90
  -5  13   2    1.90   22.20
  -3 -13   2   58.69   26.50
   3 -13  -2   96.09   33.10
   3 -13  -2   -5.30   27.50
   3  13  -2   11.10   24.00
  -3  13   2   17.70   24.20
  -3  13   2   14.70   25.70
   3  13  -2   63.19   27.10
   1 -13  -2  163.88   36.30
  -1 -13   2  213.88   34.10
   1 -13  -2  216.68   40.50
   1  13  -2  161.88   32.50
   1  13  -2  158.58   30.20
  -1  13   2  192.68   32.80
  -1  13   2  131.39   30.00
   1 -13   2   68.59   30.00
  -1 -13  -2   91.69   36.50
  -1  13  -2   68.49   27.20
   1  13   2   28.80   25.20
   1  13   2   33.40   26.70
  -1  13  -2   68.99   25.50
   3 -13   2   28.60   29.10
  -3 -13  -2  109.79   38.80
   3 -13   2   44.90   30.00
  -3  13  -2   50.79   24.20
   3  13   2   38.30   27.80
   3  13   2    7.40   26.40
  -3  13  -2   17.80   25.20
   5 -13   2  -18.60   29.10
  -5 -13  -2   64.49   38.00
   5 -13   2   -6.20   28.30
   5  13   2   -1.10   26.40
  -5  13  -2   10.70   34.90
   5  13   2   74.89   27.70
  -5  13  -2  -12.80   22.90
  -7 -13  -2   61.09   43.90
   7 -13   2   -8.00   28.60
  -7  13  -2  -17.50   24.50
   7  13   2  -12.30   24.60
   7  13   2  -15.50   27.60
   9 -13   2   26.70   29.20
   9 -13   2   50.79   34.90
  -9 -13  -2   43.30   47.70
  -9  13  -2   64.89   28.70
   9  13   2   29.10   28.90
   9  13   2   -5.80   29.50
   8 -14  -2   65.69   30.70
   8 -14  -2   16.90   31.60
   8  14  -2   31.70   28.50
  -8  14   2   17.00   27.40
   8  14  -2   37.50   29.00
   6 -14  -2   88.89   31.40
  -6 -14   2   35.50   29.60
   6 -14  -2   15.40   29.30
   6  14  -2   77.39   31.80
   6  14  -2   26.40   28.70
  -6  14   2   56.99   29.10
  -6  14   2   52.29   27.80
  -4 -14   2  187.98   36.00
   4 -14  -2  100.09   33.20
   4 -14  -2  177.68   37.70
   4 -14  -2  123.79   32.30
   4  14  -2   70.29   32.80
  -4  14   2   86.19   29.20
  -4  14   2  137.89   33.80
   4  14  -2   53.89   29.30
   2 -14  -2   73.09   32.60
   2 -14  -2  134.19   37.00
  -2 -14   2   74.19   30.30
   2  14  -2   13.90   26.80
  -2  14   2   27.30   28.90
  -2  14   2   61.49   29.80
   2  14  -2   41.40   29.20
   0 -14  -2   51.99   34.10
   0 -14  -2  119.59   38.90
   0 -14   2   91.39   33.60
   0  14   2   42.40   27.90
   0  14  -2   67.59   29.60
   0  14   2   69.89   29.90
   0  14  -2   29.10   26.00
   2 -14   2   15.20   29.80
   2 -14   2  -33.40   29.10
  -2 -14  -2   92.79   39.30
   2  14   2  -38.90   25.70
   2  14   2   28.80   28.40
  -2  14  -2   -8.60   27.10
  -2  14  -2  -34.10   22.30
  -4 -14  -2  120.99   41.90
   4 -14   2  -10.90   32.80
   4 -14   2   17.10   31.80
  -4  14  -2   31.20   26.20
   4  14   2   14.50   29.00
   4  14   2   75.09   32.70
 -28   0   3  -17.80   39.10
  28   0  -3   19.70   25.60
 -28   0   3  -19.70   29.80
  28   0  -3   12.30   25.80
  26   0  -3   18.60   24.10
  26   0  -3   20.60   23.30
 -26   0   3   -7.40   35.60
 -26   0   3  -37.20   26.30
  24   0  -3   10.40   22.70
 -24   0   3   -0.60   23.30
  24   0  -3   22.60   21.80
 -24   0   3   26.50   33.50
  22   0  -3   -3.60   21.60
  22   0  -3   -5.70   17.30
  22   0  -3   -1.70   17.80
 -22   0   3   21.30   28.00
 -22   0   3  -14.60   19.20
 -20   0   3   69.49   26.40
  20   0  -3   57.49   23.00
  20   0  -3   53.69   17.20
  20   0  -3   71.19   18.50
 -20   0   3   49.99   19.60
  18   0  -3   52.29   20.30
 -18   0   3   41.50   21.10
 -18   0   3   48.40   16.20
  18   0  -3   54.09   15.20
  18   0  -3   40.80   13.70
  16   0  -3   72.79   13.00
 -16   0   3   92.39   21.70
  16   0  -3   87.59   14.90
  16   0  -3  110.09   20.80
 -16   0   3   99.09   16.30
 -14   0   3    8.80   10.50
  14   0  -3   11.50   10.20
  14   0  -3    2.70   14.00
 -14   0   3    8.40   14.70
  14   0  -3    9.90    9.30
 -12   0   3    2.60    9.30
  12   0  -3   -0.10    8.10
  12   0  -3   12.30   11.80
 -12   0   3    1.90   12.20
  12   0  -3    9.20    7.60
 -10   0   3   -1.00    9.70
  10   0  -3    3.20    6.50
  10   0  -3    5.40    9.30
  10   0  -3  -11.70    7.10
 -10   0   3   -7.80    7.80
   8   0  -3    1.10    5.60
   8   0  -3    3.10    7.90
  -8   0   3    4.00    7.50
  -8   0   3    2.30    6.90
   8   0  -3   -2.30    5.60
   6   0  -3   -8.70    4.90
   6   0  -3   -7.50    4.80
   6   0  -3    1.20    7.00
  -6   0   3   -1.50    6.40
   4   0  -3   -3.20    4.10
   4   0  -3   -4.00    4.50
  -4   0   3   -0.20    5.10
   4   0  -3   -4.60    4.40
   2   0  -3    7.00    3.90
  -2   0   3   -4.00    3.00
   2   0  -3    0.00    4.00
   2   0  -3    3.10    3.20
   0   0   3   11.40    4.30
   0   0  -3   12.10    3.20
   0   0  -3    9.80    4.90
   0   0  -3    9.70    3.30
   2   0   3    9.40    6.00
  -2   0  -3   23.40    6.40
  -2   0  -3    9.00    4.00
  -2   0  -3   -0.90    9.10
  -4   0  -3    5.70    6.30
   4   0   3    4.00    4.70
   4   0   3   -0.10    6.10
  -4   0  -3    5.40    4.60
  -4   0  -3   12.60   10.20
  -6   0  -3   72.19    8.00
   6   0   3   63.69    9.30
   6   0   3   76.29    8.20
  -6   0  -3   78.69   13.80
  -6   0  -3   68.39    9.60
  -8   0  -3   89.29   10.00
   8   0   3   61.79   10.50
  -8   0  -3   70.29   11.40
  -8   0  -3   98.19   17.10
   8   0   3   67.29    9.00
  10   0   3   86.29   11.20
 -10   0  -3  103.99   19.70
 -10   0  -3   92.89   11.50
  10   0   3   93.89   12.70
 -10   0  -3  101.59   14.00
 -12   0  -3   94.99   15.40
  12   0   3  115.09   13.90
 -12   0  -3   89.59   21.30
  12   0   3   81.29   13.90
 -14   0  -3   16.80   13.90
  14   0   3   22.00   12.70
 -14   0  -3   14.00   20.20
  14   0   3   33.70   12.70
  16   0   3    1.50   13.40
 -16   0  -3  -10.40   23.40
 -16   0  -3    3.10   15.60
  16   0   3   -0.80   15.40
  16   0   3  -16.00   13.70
  18   0   3    1.10   16.10
 -18   0  -3  -11.80   17.00
 -18   0  -3  -23.30   25.80
  18   0   3   -9.00   13.80
  18   0   3   -8.10   16.30
 -20   0  -3    9.10   20.20
  20   0   3   58.09   20.60
 -20   0  -3   -7.50   31.30
  20   0   3    7.90   21.60
 -22   0  -3   81.49   26.00
  22   0   3   42.90   25.60
 -22   0  -3   10.40   36.10
  22   0   3   80.59   22.50
 -24   0  -3   16.10   42.80
 -24   0  -3   67.09   27.70
  24   0   3   16.40   22.70
  24   0   3   17.30   27.60
  27  -1  -3   45.70   25.20
  27  -1  -3   26.60   26.00
 -27  -1   3  -18.70   36.90
 -27   1   3   15.50   37.70
  27   1  -3   76.19   27.30
 -27   1   3   36.80   29.40
 -25  -1   3  108.79   28.60
  25  -1  -3  173.78   27.30
  25  -1  -3  148.09   29.00
 -25  -1   3  138.39   41.80
  25   1  -3  130.69   26.50
  25   1  -3  156.18   27.20
 -25   1   3  105.09   30.40
 -25   1   3  133.69   42.30
 -23  -1   3   38.70   33.70
  23  -1  -3   52.49   36.30
 -23  -1   3   43.10   23.50
  23  -1  -3   77.69   24.00
  23  -1  -3   57.89   21.20
 -23   1   3   48.70   24.50
  23   1  -3   66.69   24.50
  23   1  -3   41.10   20.80
  23   1  -3   71.99   21.80
 -23   1   3   69.19   33.20
  21  -1  -3   58.09   20.10
 -21  -1   3   26.50   19.10
  21  -1  -3   41.30   23.90
  21  -1  -3   -0.80   16.80
 -21  -1   3    6.10   26.00
 -21   1   3   14.20   20.60
 -21   1   3   12.80   26.40
  21   1  -3    3.30   16.40
  21   1  -3   53.79   23.10
  21   1  -3   17.80   17.70
 -19  -1   3  790.52   50.79
  19  -1  -3  797.72   40.90
  19  -1  -3  738.93   35.60
 -19  -1   3  739.73   38.50
  19  -1  -3  758.22   43.00
 -19   1   3  769.52   49.30
  19   1  -3  780.12   41.60
  19   1  -3  731.73   35.00
  19   1  -3  762.72   36.80
 -19   1   3  799.72   43.40
 -17  -1   3  927.31   37.60
 -17  -1   3  871.71   48.00
  17  -1  -3  890.11   38.90
  17  -1  -3  897.71   40.50
  17  -1  -3  842.12   34.50
  17   1  -3  888.31   35.90
  17   1  -3  934.91   41.20
 -17   1   3  884.91   40.60
 -17   1   3  866.81   46.50
  17   1  -3  918.21   34.30
  15  -1  -3 2044.10   54.79
 -15  -1   3 2097.79   65.49
  15  -1  -3 2048.30   49.60
 -15  -1   3 2105.99   52.49
  15  -1  -3 2137.29   55.59
  15   1  -3 2110.79   51.69
  15   1  -3 2012.00   48.40
 -15   1   3 2054.09   56.59
  15   1  -3 2187.68   56.69
 -15   1   3 2023.10   63.19
  13  -1  -3 1536.75   43.80
  13  -1  -3 1621.44   45.10
  13  -1  -3 1555.94   39.30
 -13  -1   3 1580.14   42.30
 -13  -1   3 1637.34   52.69
  13   1  -3 1599.34   45.40
 -13   1   3 1530.75   50.59
  13   1  -3 1552.54   41.00
  13   1  -3 1539.15   38.90
 -13   1   3 1539.45   45.00
 -11  -1   3  473.45   27.90
  11  -1  -3  461.95   23.20
  11  -1  -3  460.75   23.40
  11  -1  -3  436.96   19.70
 -11  -1   3  436.76   21.70
 -11   1   3  429.96   23.60
  11   1  -3  423.06   20.40
  11   1  -3  420.46   19.40
 -11   1   3  452.55   27.20
  11   1  -3  472.95   25.50
   9  -1  -3   32.00    9.00
   9  -1  -3   32.70    7.60
  -9  -1   3   24.20   10.20
   9  -1  -3   29.90    8.10
  -9   1   3   25.00   10.30
   9   1  -3   25.50   10.60
  -9   1   3   37.00    9.50
   9   1  -3   23.20    6.90
   9   1  -3   16.00    6.80
   7  -1  -3 1860.51   35.20
   7  -1  -3 1882.61   39.30
   7  -1  -3 1868.21   39.90
  -7  -1   3 1865.71   42.50
  -7   1   3 1854.01   40.40
   7   1  -3 1918.91   36.90
  -7   1   3 1919.41   44.40
   7   1  -3 1990.20   41.30
   7   1  -3 1814.72   35.50
   5  -1  -3 1674.43   30.00
   5  -1  -3 1707.33   34.40
  -5  -1   3 1727.83   29.80
  -5  -1   3 1794.12   35.90
   5  -1  -3 1687.93   34.40
   5   1  -3 1770.42   35.80
   5   1  -3 1698.33   32.00
   5   1  -3 1699.03   29.10
  -5   1   3 1726.63   38.30
   5   1  -3 1695.33   32.20
  -3  -1   3 2267.87   36.30
   3  -1  -3 2176.48   38.40
   3  -1  -3 2211.18   38.80
  -3   1   3 2221.88   33.80
   3   1  -3 2303.77   35.90
  -3   1   3 2177.98   42.00
   3   1  -3 2174.28   36.70
  -3   1   3 2216.38   38.00
   3   1  -3 2212.98   38.70
   3   1  -3 2103.99   37.20
   1  -1  -3  496.75   14.40
   1  -1  -3  513.65   17.70
   1  -1  -3  494.85   14.10
  -1  -1   3  524.95   14.10
  -1   1   3  519.35   13.60
   1   1  -3  524.95   13.90
   1   1  -3  508.35   15.60
  -1   1   3  490.15   13.40
  -1   1   3  511.55   17.60
   1   1  -3  537.75   13.50
  -1  -1  -3 1052.79   28.30
   1  -1   3 1018.60   22.70
  -1  -1  -3 1063.49   22.30
  -1  -1  -3 1066.29   23.10
   1   1   3 1078.89   23.20
   1   1   3 1042.40   21.30
  -1   1  -3 1045.20   24.90
  -1   1  -3 1021.90   21.60
  -3  -1  -3  164.08   19.40
  -3  -1  -3  194.28   12.50
   3  -1   3  182.58   11.80
  -3   1  -3  169.48   10.40
   3   1   3  193.78   12.20
   3   1   3  181.48    9.80
  -3   1  -3  190.78   14.30
  -5  -1  -3 2516.65   47.30
  -5  -1  -3 2638.24   57.19
  -5  -1  -3 2513.05   43.00
   5  -1   3 2678.33   48.20
   5  -1   3 2587.34   46.40
   5   1   3 2674.93   48.50
  -5   1  -3 2527.95   51.39
  -5   1  -3 2544.95   45.90
   5   1   3 2574.34   43.00
   5   1   3 2698.73   45.80
  -5   1  -3 2566.14   50.69
  -7  -1  -3 1024.10   38.30
   7  -1   3  999.50   28.20
   7  -1   3  996.10   26.90
  -7  -1  -3  988.50   25.10
  -7  -1  -3 1000.60   28.70
  -7   1  -3  951.70   32.50
   7   1   3  995.20   28.00
   7   1   3  968.10   24.40
  -7   1  -3  970.60   26.60
  -7   1  -3  998.10   31.80
   7   1   3 1023.20   26.30
   9  -1   3 3018.50   57.49
  -9  -1  -3 3044.90   72.29
   9  -1   3 2908.41   56.19
  -9  -1  -3 2968.90   59.89
  -9   1  -3 2875.51   63.49
   9   1   3 3040.40   55.99
   9   1   3 2934.51   53.89
  -9   1  -3 2877.31   66.39
   9   1   3 2953.50   57.69
  -9   1  -3 2863.21   56.09
 -11  -1  -3 1224.38   38.00
  11  -1   3 1184.78   34.30
 -11  -1  -3 1218.88   49.00
  11  -1   3 1211.08   34.90
 -11   1  -3 1164.38   40.90
  11   1   3 1218.48   35.10
 -11   1  -3 1158.18   34.10
 -11   1  -3 1184.98   44.90
  11   1   3 1274.77   33.60
 -13  -1  -3  314.67   36.30
  13  -1   3  302.77   22.50
  13  -1   3  337.17   23.30
 -13  -1  -3  349.96   26.00
  13   1   3  299.27   22.30
 -13   1  -3  304.87   27.60
 -13   1  -3  317.17   32.80
  13   1   3  308.47   22.00
 -13   1  -3  276.57   23.20
  13   1   3  320.57   20.60
 -15  -1  -3   51.99   16.50
  15  -1   3   59.09   15.20
  15  -1   3   71.49   15.30
 -15  -1  -3   87.09   28.10
  15   1   3   81.69   14.50
 -15   1  -3   80.69   18.90
 -15   1  -3   60.39   25.10
  15   1   3   55.89   14.50
  15   1   3   55.19   15.30
  17  -1   3    3.00   18.50
 -17  -1  -3    0.60   16.00
  17  -1   3   10.40   14.00
  17  -1   3  -18.80   15.00
 -17  -1  -3  -36.80   26.20
  17   1   3    7.70   15.00
  17   1   3    5.10   14.90
 -17   1  -3   -4.90   18.30
 -17   1  -3    2.50   25.30
  17   1   3    0.40   14.70
 -19  -1  -3  236.68   43.70
  19  -1   3  225.68   26.30
 -19  -1  -3  213.28   25.60
  19  -1   3  223.18   28.80
  19   1   3  218.28   26.70
 -19   1  -3  204.38   28.90
 -19   1  -3  230.58   40.30
  19   1   3  267.37   28.50
  19   1   3  279.47   29.40
  21  -1   3  153.48   26.10
  21  -1   3  152.28   30.00
 -21  -1  -3  174.78   44.20
 -21  -1  -3  177.88   26.60
 -21   1  -3  171.08   29.10
  21   1   3  164.48   28.10
 -21   1  -3  184.28   42.30
  21   1   3  200.88   25.60
  23  -1   3   30.40   24.10
  23  -1   3   28.90   26.70
 -23  -1  -3  -46.80   38.20
 -23   1  -3  -18.90   36.30
  23   1   3   47.20   22.70
 -23   1  -3   67.39   26.40
  25  -1   3   49.40   25.70
 -25  -1  -3  -64.89   41.20
  25  -1   3    8.80   29.20
 -25   1  -3    7.90   40.70
 -25   1  -3   25.60   28.00
  25   1   3   42.80   23.70
  28  -2  -3   37.40   28.90
 -28  -2   3  -56.99   38.80
  28  -2  -3   19.80   25.70
 -28   2   3  -28.90   39.00
 -28   2   3   16.10   30.60
  28   2  -3   21.30   25.50
 -26  -2   3  141.39   46.20
  26  -2  -3  142.59   31.60
  26  -2  -3  200.98   29.20
 -26   2   3  130.09   33.70
  26   2  -3  149.39   27.90
 -26   2   3  118.09   43.90
 -24  -2   3  -25.50   35.30
 -24  -2   3   12.20   34.50
  24  -2  -3   13.10   24.00
  24  -2  -3   21.20   21.70
 -24   2   3   -8.60   31.40
  24   2  -3   36.30   22.20
 -24   2   3   20.20   25.30
  24   2  -3   61.49   24.90
  22  -2  -3   24.30   22.30
  22  -2  -3   32.70   19.30
 -22  -2   3   -6.60   18.80
  22  -2  -3   27.20   26.40
 -22  -2   3   17.40   31.40
  22   2  -3   45.00   17.80
 -22   2   3   13.50   28.20
  22   2  -3    6.80   18.90
  22   2  -3   40.10   23.00
 -22   2   3   10.10   22.30
  20  -2  -3  349.17   35.50
 -20  -2   3  325.37   44.10
  20  -2  -3  307.67   30.00
  20  -2  -3  319.07   36.80
 -20  -2   3  285.27   32.60
 -20   2   3  322.07   40.20
  20   2  -3  282.77   34.70
  20   2  -3  297.27   29.40
  20   2  -3  323.07   30.90
 -20   2   3  322.37   37.80
  18  -2  -3 1232.58   48.80
 -18  -2   3 1260.47   44.30
 -18  -2   3 1184.48   58.09
  18  -2  -3 1226.28   41.80
  18  -2  -3 1258.57   49.10
 -18   2   3 1220.18   55.19
  18   2  -3 1265.07   42.40
 -18   2   3 1189.78   50.19
  18   2  -3 1233.18   41.50
  18   2  -3 1195.98   47.80
 -16  -2   3 1813.92   48.80
  16  -2  -3 1779.22   47.50
 -16  -2   3 1780.72   63.89
  16  -2  -3 1856.91   53.99
  16  -2  -3 1764.02   54.49
  16   2  -3 1679.83   41.10
  16   2  -3 1777.22   53.49
  16   2  -3 1829.52   47.60
  16   2  -3 1767.72   46.20
 -16   2   3 1814.92   61.29
 -16   2   3 1818.42   56.49
  14  -2  -3 2409.36   56.79
  14  -2  -3 2111.19   57.29
  14  -2  -3 2192.88   50.69
 -14  -2   3 2261.87   66.59
 -14  -2   3 2226.28   51.19
  14   2  -3 2148.39   49.20
  14   2  -3 2113.79   45.10
 -14   2   3 2166.38   58.99
  14   2  -3 2226.08   57.29
 -14   2   3 2142.69   63.19
  14   2  -3 2184.18   49.80
  12  -2  -3 2331.17   49.20
  12  -2  -3 2354.96   53.59
 -12  -2   3 2373.16   63.39
  12  -2  -3 2341.67   56.29
  12   2  -3 2385.96   56.29
  12   2  -3 2237.08   45.50
  12   2  -3 2262.17   47.80
 -12   2   3 2276.87   61.89
 -12   2   3 2337.27   57.59
  12   2  -3 2261.87   48.30
 -10  -2   3  355.96   25.40
  10  -2  -3  338.87   20.30
  10  -2  -3  348.87   17.30
  10  -2  -3  329.47   20.70
 -10   2   3  321.37   22.10
  10   2  -3  323.77   22.10
 -10   2   3  339.57   24.10
  10   2  -3  318.67   15.80
  10   2  -3  315.67   17.20
  10   2  -3  311.27   16.50
   8  -2  -3  191.08   14.60
   8  -2  -3  176.38   15.50
   8  -2  -3  157.48   11.90
  -8  -2   3  181.98   18.00
   8   2  -3  135.99   17.00
   8   2  -3  165.38   12.30
   8   2  -3  153.78   13.10
   8   2  -3  161.98   11.50
  -8   2   3  161.48   16.60
  -8   2   3  183.68   17.50
   6  -2  -3 8264.77  123.89
   6  -2  -3 8459.35  122.59
  -6  -2   3 7967.00  124.39
   6  -2  -3 8151.18  116.09
   6   2  -3 8071.99  118.99
  -6   2   3 8103.29  124.09
  -6   2   3 8495.05  130.79
   6   2  -3 8332.47  124.59
   6   2  -3 8097.59  118.59
   6   2  -3 8071.39  116.69
  -4  -2   3 1176.68   26.20
   4  -2  -3 1165.98   27.10
   4  -2  -3 1179.68   27.70
  -4   2   3 1182.28   31.80
   4   2  -3 1193.28   25.80
  -4   2   3 1167.08   26.30
   4   2  -3 1181.08   29.50
   4   2  -3 1149.89   25.30
   4   2  -3 1147.29   24.50
  -2  -2   3 4696.53   71.79
   2  -2  -3 4544.15   69.99
   2  -2  -3 4619.44   78.19
   2  -2  -3 4711.73   73.39
  -2   2   3 4624.04   68.59
   2   2  -3 4571.14   70.29
   2   2  -3 4749.02   72.19
   2   2  -3 4565.14   70.29
  -2   2   3 4560.34   78.29
  -2   2   3 4651.03   72.49
   2   2  -3 4531.95   70.19
   0  -2  -3   24.70   10.00
   0  -2   3   27.40    6.30
   0  -2  -3   44.50    9.00
   0  -2  -3   15.40    5.90
   0   2  -3   17.10    5.70
   0   2   3   40.80    9.90
   0   2  -3   35.10    6.10
   0   2  -3   32.70    6.20
   0   2  -3   36.70    7.10
   0   2   3   27.40    5.80
   0   2   3   35.50    6.20
  -2  -2  -3  165.88   11.40
   2  -2   3  150.98   11.30
  -2  -2  -3  162.28   17.50
  -2   2  -3  154.58   13.50
   2   2   3  146.19   11.20
   2   2   3  153.48   11.20
  -2   2  -3  150.08   10.80
  -4  -2  -3 1549.34   43.80
   4  -2   3 1506.75   33.10
   4   2   3 1508.65   33.50
  -4   2  -3 1492.15   32.20
  -4   2  -3 1508.05   36.90
   4   2   3 1530.55   33.70
   6  -2   3 1754.42   38.50
  -6  -2  -3 1738.93   36.40
  -6  -2  -3 1765.02   50.89
   6  -2   3 1848.52   39.40
   6   2   3 1767.32   39.30
   6   2   3 1864.31   40.20
  -6   2  -3 1794.52   38.20
  -6   2  -3 1767.72   44.00
   8  -2   3 4129.59   72.89
   8  -2   3 4099.29   72.29
  -8  -2  -3 4045.40   87.79
  -8  -2  -3 3964.70   70.49
  -8   2  -3 4033.40   77.79
   8   2   3 4257.57   74.59
   8   2   3 4129.99   72.99
  -8   2  -3 4072.99   79.49
  -8   2  -3 4079.59   72.09
   8   2   3 4011.40   66.09
  10  -2   3 1313.47   36.50
  10  -2   3 1348.57   37.00
 -10  -2  -3 1285.37   36.30
 -10  -2  -3 1354.56   52.19
 -10   2  -3 1277.47   43.10
  10   2   3 1292.47   32.30
  10   2   3 1324.67   37.10
 -10   2  -3 1282.17   42.80
 -10   2  -3 1346.67   36.80
  10   2   3 1301.37   36.70
  12  -2   3 1416.66   40.20
 -12  -2  -3 1395.86   56.99
 -12  -2  -3 1315.67   39.70
  12  -2   3 1348.97   39.40
 -12   2  -3 1378.36   47.30
 -12   2  -3 1339.67   39.60
  12   2   3 1361.16   39.90
  12   2   3 1411.66   40.30
  12   2   3 1387.56   36.30
 -12   2  -3 1410.56   49.60
 -14  -2  -3  503.55   46.00
 -14  -2  -3  428.76   28.40
  14  -2   3  477.65   28.00
  14  -2   3  496.25   27.50
 -14   2  -3  424.86   36.30
  14   2   3  467.45   27.20
 -14   2  -3  433.06   33.80
  14   2   3  484.75   25.30
  14   2   3  422.26   26.40
 -14   2  -3  465.45   28.00
  16  -2   3   72.39   18.30
  16  -2   3   85.89   16.90
 -16  -2  -3   89.09   33.10
 -16  -2  -3   76.09   17.60
  16   2   3   75.49   18.30
 -16   2  -3   72.09   21.20
 -16   2  -3   70.79   26.80
  16   2   3   94.59   17.50
  16   2   3   90.19   18.60
 -16   2  -3   62.39   17.80
  16   2   3   70.69   16.80
  18  -2   3  270.17   30.70
  18  -2   3  274.27   32.40
 -18  -2  -3  327.47   30.70
  18  -2   3  310.87   32.50
 -18  -2  -3  268.07   44.90
  18   2   3  307.07   29.70
  18   2   3  289.77   28.60
  18   2   3  299.27   30.90
 -18   2  -3  322.27   37.80
 -18   2  -3  284.27   39.10
  20  -2   3   76.39   24.30
  20  -2   3   94.49   26.30
 -20  -2  -3   10.50   36.60
 -20   2  -3  101.09   35.00
  20   2   3  109.89   21.20
  20   2   3   68.39   20.50
 -20   2  -3  100.59   26.30
  22  -2   3   67.59   27.70
  22  -2   3    5.20   23.20
 -22  -2  -3  -31.00   40.40
 -22   2  -3   63.79   25.70
  22   2   3   64.69   21.80
 -22   2  -3   46.00   36.60
  24  -2   3  -12.10   26.40
  24  -2   3   -1.50   23.80
 -24   2  -3   -0.30   39.50
  24   2   3   25.00   21.70
 -24   2  -3   -0.80   25.70
  27  -3  -3   48.30   28.60
 -27  -3   3  -28.70   40.40
  27  -3  -3   50.39   25.60
 -27   3   3    1.10   29.70
  27   3  -3   35.90   24.70
 -27   3   3  -37.90   37.60
 -25  -3   3    1.40   38.00
  25  -3  -3   -0.50   23.40
  25  -3  -3   38.60   26.70
 -25   3   3  -29.60   33.20
  25   3  -3   38.10   23.30
  25   3  -3   72.19   25.60
 -25   3   3   55.69   28.60
  23  -3  -3   82.19   26.60
  23  -3  -3   50.39   21.50
 -23  -3   3   41.40   36.10
  23   3  -3   68.79   21.90
  23   3  -3  102.99   25.30
 -23   3   3    6.20   30.90
 -23   3   3   87.69   29.20
 -21  -3   3  208.98   39.20
  21  -3  -3  160.48   23.20
  21  -3  -3  141.39   27.50
  21  -3  -3  140.99   29.90
  21   3  -3  187.18   27.20
 -21   3   3  195.28   35.90
 -21   3   3  148.99   29.90
  21   3  -3  185.28   23.70
  19  -3  -3  279.77   35.30
  19  -3  -3  345.77   29.90
 -19  -3   3  292.47   43.90
  19  -3  -3  304.97   36.30
 -19   3   3  315.97   38.90
  19   3  -3  363.96   29.60
 -19   3   3  314.07   37.70
  19   3  -3  331.17   26.70
  19   3  -3  350.36   35.00
  17  -3  -3  552.54   35.80
 -17  -3   3  550.64   45.00
  17  -3  -3  598.94   37.70
  17  -3  -3  581.54   31.30
 -17   3   3  558.84   38.40
 -17   3   3  578.44   40.20
  17   3  -3  562.04   26.80
  17   3  -3  526.85   34.60
  17   3  -3  597.14   27.60
  17   3  -3  583.54   29.80
 -15  -3   3  433.86   38.50
  15  -3  -3  474.55   29.50
  15  -3  -3  478.65   26.80
  15  -3  -3  459.05   31.80
  15   3  -3  424.56   30.20
 -15   3   3  498.75   34.30
  15   3  -3  464.35   24.60
  15   3  -3  469.35   22.90
 -15   3   3  414.46   32.70
  15   3  -3  451.05   23.20
 -13  -3   3  112.49   23.10
  13  -3  -3   68.79   14.20
  13  -3  -3  110.29   17.20
  13  -3  -3  130.79   17.70
 -13   3   3  118.39   18.30
  13   3  -3  112.59   13.20
 -13   3   3  108.99   19.70
  13   3  -3  106.19   11.90
  13   3  -3  115.99   18.10
  13   3  -3  113.09   13.60
  11  -3  -3 1267.87   37.10
  11  -3  -3 1177.88   39.20
  11  -3  -3 1142.59   32.70
 -11  -3   3 1198.58   45.10
  11   3  -3 1120.69   29.00
 -11   3   3 1131.49   42.10
  11   3  -3 1139.69   32.00
  11   3  -3 1146.89   32.30
 -11   3   3 1155.48   40.40
  11   3  -3 1161.08   39.40
   9  -3  -3   61.49   12.10
   9  -3  -3   55.79   11.40
   9  -3  -3   64.69    9.10
  -9  -3   3   76.19   15.60
   9   3  -3   63.39    9.80
  -9   3   3   72.49   13.40
   9   3  -3   72.99   10.60
  -9   3   3   55.69   13.50
   9   3  -3   75.29   13.00
   7  -3  -3   35.40    9.00
   7  -3  -3   44.10    7.00
  -7  -3   3   43.20   12.30
   7  -3  -3   56.39   10.20
  -7   3   3   46.30   10.80
   7   3  -3   35.50    8.20
   7   3  -3   46.60   10.40
  -7   3   3   40.10   11.70
  -7   3   3   47.90    8.20
   7   3  -3   42.10    8.90
   5  -3  -3  834.02   25.30
   5  -3  -3  810.32   25.00
   5  -3  -3  810.52   18.90
  -5  -3   3  800.92   27.10
  -5   3   3  841.22   24.10
  -5   3   3  844.42   26.50
   5   3  -3  844.42   27.00
   5   3  -3  830.32   24.30
   5   3  -3  786.62   22.50
  -5   3   3  842.72   20.80
  -5   3   3  822.32   30.00
   3  -3  -3 2747.33   57.09
  -3  -3   3 2673.23   50.69
   3  -3  -3 2682.93   48.00
   3  -3  -3 2777.12   51.79
   3   3  -3 2641.14   47.30
  -3   3   3 2712.93   46.70
   3   3  -3 2784.32   51.69
   3   3  -3 2695.03   45.90
   3   3  -3 2660.83   49.60
  -3   3   3 2778.32   57.89
  -3   3   3 2756.22   50.99
  -1  -3   3  284.87   15.10
   1  -3  -3  288.57   17.20
   1  -3  -3  268.77   19.60
   1  -3  -3  264.77   12.20
   1   3  -3  294.07   14.30
   1   3  -3  299.37   14.00
  -1   3   3  281.27   13.70
  -1   3   3  264.87   19.00
   1   3  -3  302.67   14.20
   1   3  -3  307.67   14.80
  -1   3   3  293.67   14.80
   1  -3   3  536.75   19.20
  -1  -3  -3  478.15   25.40
  -1   3  -3  494.75   16.20
  -1   3  -3  486.75   17.50
  -1   3  -3  491.05   17.80
   1   3   3  533.75   18.60
  -1   3  -3  528.65   20.10
   1   3   3  514.55   19.50
  -3  -3  -3  115.69   17.80
   3  -3   3  113.79   12.30
   3   3   3  116.89   12.40
  -3   3  -3  118.29   14.80
  -3   3  -3   88.39    9.70
   3   3   3  112.19   12.10
  -3   3  -3  107.69   11.70
   5  -3   3  472.55   20.70
  -5  -3  -3  491.55   31.80
   5  -3   3  484.95   20.30
  -5   3  -3  508.05   20.00
   5   3   3  504.75   21.60
  -5   3  -3  506.85   23.90
   5   3   3  479.65   20.30
  -7  -3  -3 1418.66   51.49
   7  -3   3 1480.15   37.00
   7  -3   3 1402.96   38.00
   7   3   3 1478.25   39.40
  -7   3  -3 1461.75   36.30
   7   3   3 1443.46   37.20
  -7   3  -3 1472.85   42.50
   9  -3   3 1052.29   34.30
  -9  -3  -3 1061.89   49.30
   9  -3   3 1050.19   32.90
  -9   3  -3 1018.60   32.10
   9   3   3 1045.10   34.70
   9   3   3 1013.20   26.40
   9   3   3  976.80   32.10
  -9   3  -3 1049.79   36.10
  -9   3  -3 1077.49   39.10
 -11  -3  -3  367.86   21.60
  11  -3   3  408.56   24.40
  11  -3   3  331.67   25.50
 -11  -3  -3  353.96   40.20
  11   3   3  377.26   23.70
  11   3   3  367.56   19.70
  11   3   3  393.06   25.30
 -11   3  -3  406.26   24.00
 -11   3  -3  403.56   28.10
 -11   3  -3  390.06   29.60
  13  -3   3  359.96   26.10
 -13  -3  -3  414.76   44.40
 -13  -3  -3  373.16   24.40
  13  -3   3  361.36   26.70
  13   3   3  375.56   22.90
 -13   3  -3  371.36   32.50
  13   3   3  376.26   26.60
 -13   3  -3  370.46   26.20
  13   3   3  380.56   25.20
 -13   3  -3  404.26   32.20
  15  -3   3  575.74   31.80
 -15  -3  -3  472.05   50.99
 -15  -3  -3  500.95   29.10
  15  -3   3  578.84   33.90
  15   3   3  533.75   28.20
 -15   3  -3  528.55   38.50
 -15   3  -3  535.75   32.50
  15   3   3  515.35   30.50
  15   3   3  520.25   29.10
 -15   3  -3  552.74   39.90
  17  -3   3   38.90   21.40
  17  -3   3  -12.60   16.10
 -17  -3  -3    7.10   34.90
  17  -3   3   14.70   17.50
  17   3   3    6.50   16.90
  17   3   3    9.40   22.10
 -17   3  -3   37.30   21.20
  17   3   3   21.00   15.40
 -17   3  -3   14.00   18.10
 -17   3  -3    9.80   24.70
  19  -3   3   55.99   22.40
 -19  -3  -3   20.40   38.40
  19  -3   3   71.09   24.40
  19   3   3   77.19   19.90
 -19   3  -3   45.50   23.70
  19   3   3   54.19   20.00
 -19   3  -3   41.40   29.50
 -21  -3  -3   26.80   44.10
  21  -3   3   95.49   26.30
  21  -3   3   69.69   27.40
  21   3   3  134.49   23.80
 -21   3  -3   62.79   25.50
 -21   3  -3  111.29   37.50
  23  -3   3   39.70   28.30
 -23  -3  -3   -1.50   43.90
  23  -3   3   91.19   26.30
 -23   3  -3   58.29   38.10
  23   3   3   97.69   23.80
 -23   3  -3   90.99   29.70
  26  -4  -3  229.78   37.80
  26  -4  -3  167.38   30.40
 -26  -4   3  131.69   48.30
 -26   4   3  177.48   37.40
  26   4  -3  261.67   37.50
 -26   4   3  168.28   42.90
  26   4  -3  239.78   31.40
 -24  -4   3  270.97   50.39
  24  -4  -3  245.68   31.80
  24  -4  -3  287.17   37.10
  24   4  -3  371.66   38.00
 -24   4   3  276.67   40.10
 -24   4   3  293.97   45.40
  24   4  -3  391.06   40.20
 -22  -4   3  156.68   41.50
  22  -4  -3  155.98   25.30
  22  -4  -3  152.08   29.40
 -22   4   3  177.58   34.50
  22   4  -3  208.08   25.70
  22   4  -3  168.48   27.80
 -22   4   3  175.18   36.50
  20  -4  -3   45.30   25.40
 -20  -4   3   36.90   32.80
  20  -4  -3   27.40   21.60
  20  -4  -3   53.09   20.00
  20   4  -3   66.59   23.00
 -20   4   3   64.59   25.10
 -20   4   3   39.70   27.90
  20   4  -3   54.09   18.90
  18  -4  -3   46.50   20.70
  18  -4  -3   46.00   21.90
  18  -4  -3   61.29   17.70
 -18  -4   3   38.00   28.30
  18   4  -3   46.10   19.40
 -18   4   3   58.99   22.10
 -18   4   3   98.09   26.50
  18   4  -3   60.19   15.70
  18   4  -3   84.79   17.20
  16  -4  -3   91.49   15.50
  16  -4  -3   84.69   19.40
  16  -4  -3   79.29   19.00
 -16  -4   3  114.79   27.80
  16   4  -3  130.79   16.70
  16   4  -3  144.39   16.80
 -16   4   3  117.79   21.00
 -16   4   3  116.19   22.90
  16   4  -3   98.29   19.40
  14  -4  -3  107.89   17.70
  14  -4  -3  118.99   17.60
  14  -4  -3  104.29   14.70
 -14  -4   3  114.49   26.10
 -14   4   3  115.19   18.90
  14   4  -3  110.59   18.60
 -14   4   3  115.69   20.60
  14   4  -3  102.79   14.60
  14   4  -3  112.89   14.90
  12  -4  -3   34.80   12.80
  12  -4  -3   17.40   12.10
  12  -4  -3   26.10   10.70
 -12  -4   3   30.30   19.50
  12   4  -3   13.50   12.70
 -12   4   3   28.40   13.20
  12   4  -3   39.60   11.80
  12   4  -3   21.50   10.30
 -12   4   3   20.40   14.20
  10  -4  -3  178.18   20.90
  10  -4  -3  146.69   15.90
  10  -4  -3  148.29   18.00
 -10  -4   3  165.58   23.40
 -10   4   3  148.49   18.20
  10   4  -3  103.19   16.20
  10   4  -3  107.79   13.10
  10   4  -3  163.48   17.10
 -10   4   3  125.49   18.20
   8  -4  -3 2420.06   54.99
  -8  -4   3 2332.67   59.59
   8  -4  -3 2416.46   53.19
   8  -4  -3 2399.86   46.10
  -8   4   3 2499.65   57.19
  -8   4   3 2435.96   50.89
  -8   4   3 2412.56   61.39
  -8   4   3 2460.95   47.50
   8   4  -3 2425.26   48.80
   8   4  -3 2408.56   52.39
   8   4  -3 2395.96   56.19
   6  -4  -3 2626.34   53.99
   6  -4  -3 2596.94   53.99
   6  -4  -3 2485.05   44.90
  -6  -4   3 2562.74   57.69
  -6   4   3 2601.64   61.99
  -6   4   3 2636.24   55.29
  -6   4   3 2614.84   47.60
   6   4  -3 2574.74   49.40
   6   4  -3 2519.35   53.39
  -6   4   3 2625.54   52.49
   6   4  -3 2556.74   55.89
  -6   4   3 2582.34   45.70
   4  -4  -3 4105.59   71.19
   4  -4  -3 4160.78   81.19
   4  -4  -3 4209.38   74.79
  -4   4   3 4217.18   73.89
   4   4  -3 4146.39   74.99
  -4   4   3 4131.29   71.99
   4   4  -3 4184.88   73.99
  -4   4   3 4151.48   81.99
   4   4  -3 4014.30   68.19
  -4   4   3 4157.68   69.39
   2  -4  -3 3789.02   68.89
   2  -4  -3 3682.23   61.49
  -2  -4   3 3745.83   68.39
   2  -4  -3 3692.63   75.29
   2   4  -3 3703.23   61.49
   2   4  -3 3638.14   62.69
  -2   4   3 3737.03   68.09
  -2   4   3 3818.02   64.99
   2   4  -3 3742.93   67.09
  -2   4   3 3774.22   76.29
   2   4  -3 3827.82   68.19
   0  -4  -3 3088.29   68.29
   0  -4   3 3112.79   59.79
   0   4  -3 3097.79   55.79
   0   4   3 3234.88   58.19
   0   4  -3 3124.19   56.89
   0   4   3 3144.59   60.89
   0   4  -3 3205.68   57.79
   0   4  -3 3083.59   58.09
   0   4   3 3172.68   69.19
   2  -4   3  752.82   25.70
  -2  -4  -3  733.53   33.70
  -2   4  -3  756.32   21.90
  -2   4  -3  734.73   23.70
   2   4   3  785.62   27.30
   2   4   3  740.03   25.00
  -2   4  -3  750.02   24.30
  -2   4  -3  745.83   26.20
  -4  -4  -3    7.30   15.80
   4  -4   3   13.60    8.90
  -4   4  -3   11.90    7.80
   4   4   3   19.80    8.70
  -4   4  -3    6.70    7.40
  -4   4  -3   15.50    9.40
   4   4   3   17.70    8.50
   6  -4   3   50.09   10.20
   6  -4   3   25.90   10.00
  -6  -4  -3   48.30   20.30
  -6   4  -3   52.19   10.00
   6   4   3   55.79   11.40
  -6   4  -3   44.10   11.50
   6   4   3   39.50   10.90
   8  -4   3   55.19   11.80
  -8  -4  -3   59.39   22.70
   8  -4   3   39.30   12.20
  -8   4  -3   52.19   13.60
   8   4   3   44.80   12.10
  -8   4  -3   46.50   10.70
   8   4   3   66.09   12.10
  10  -4   3   40.10   14.00
  10  -4   3   48.30   12.40
 -10  -4  -3   59.79   25.70
 -10   4  -3   49.40   12.00
 -10   4  -3   67.39   15.90
  10   4   3   74.39   15.00
  10   4   3   56.89   12.90
 -10   4  -3   87.49   16.50
 -12  -4  -3   82.49   30.10
  12  -4   3   81.19   15.40
  12  -4   3  127.89   18.80
  12   4   3  103.39   12.60
 -12   4  -3  136.49   20.70
 -12   4  -3  140.59   21.80
  12   4   3  103.59   16.20
 -12   4  -3  130.49   16.50
  12   4   3   92.19   16.80
  14  -4   3    8.00   16.00
  14  -4   3   10.10   14.60
 -14  -4  -3   19.20   30.50
  14   4   3   24.50   15.50
 -14   4  -3   26.40   18.90
  14   4   3   22.10   12.60
 -14   4  -3   30.50   15.50
  14   4   3   19.80   15.00
 -14   4  -3   12.70   16.70
 -16  -4  -3  639.84   59.49
  16  -4   3  662.33   35.70
  16  -4   3  596.44   37.00
  16  -4   3  638.14   44.60
  16   4   3  646.64   32.10
  16   4   3  585.24   36.80
 -16   4  -3  619.74   44.00
 -16   4  -3  599.44   36.70
 -16   4  -3  639.74   44.50
  16   4   3  651.93   36.90
  18  -4   3  423.16   37.30
 -18  -4  -3  376.76   53.79
  18  -4   3  453.75   43.20
  18   4   3  322.87   33.10
  18   4   3  418.66   31.50
 -18   4  -3  415.86   44.40
 -18   4  -3  375.86   36.50
 -18   4  -3  351.56   42.30
  20  -4   3  796.72   47.30
 -20  -4  -3  654.33   71.09
  20  -4   3  797.22   54.09
 -20   4  -3  828.22   58.49
  20   4   3  783.52   42.80
 -20   4  -3  751.52   53.39
  20   4   3  745.73   42.90
 -22  -4  -3  151.98   50.69
  22  -4   3  213.78   32.60
  22  -4   3  212.08   36.60
 -22   4  -3  212.48   35.30
 -22   4  -3  266.67   46.40
  24  -4   3  169.68   32.20
  24  -4   3  212.38   38.30
 -24  -4  -3  111.09   53.69
 -24   4  -3  184.78   37.50
 -24   4  -3  154.88   46.00
  25  -5  -3  303.67   34.60
  25  -5  -3  241.28   38.90
 -25  -5   3  240.48   53.89
 -25   5   3  331.27   45.10
 -25   5   3  349.47   52.09
  25   5  -3  402.46   40.90
  25   5  -3  371.06   42.20
  23  -5  -3  235.68   29.90
  23  -5  -3  163.08   32.70
 -23  -5   3  163.98   46.50
 -23   5   3  259.97   44.00
  23   5  -3  275.27   34.80
  23   5  -3  265.27   29.30
 -23   5   3  203.78   38.60
  21  -5  -3   21.30   20.40
  21  -5  -3   36.20   24.00
 -21  -5   3   20.50   35.20
  21   5  -3   81.49   25.50
  21   5  -3   43.20   21.20
 -21   5   3   -4.60   26.50
 -21   5   3   10.90   28.40
  19  -5  -3  -52.59   19.60
  19  -5  -3    2.70   20.10
  19  -5  -3  -23.60   16.90
 -19  -5   3  -54.49   29.30
 -19   5   3  -25.30   22.80
  19   5  -3  -39.60   16.30
  19   5  -3  -34.50   18.90
 -19   5   3  -15.20   20.40
  19   5  -3   -4.90   15.30
  17  -5  -3   67.59   20.10
 -17  -5   3   64.99   31.20
  17  -5  -3   60.89   20.30
  17  -5  -3   65.49   18.40
 -17   5   3   83.99   24.50
  17   5  -3   78.89   20.70
  17   5  -3   90.19   17.60
  17   5  -3   84.89   17.40
 -17   5   3   90.09   22.50
  15  -5  -3  114.49   20.00
  15  -5  -3   87.49   19.10
  15  -5  -3  140.39   18.10
 -15  -5   3  121.89   30.30
 -15   5   3   99.39   21.20
  15   5  -3  115.49   17.60
  15   5  -3  139.89   17.00
  15   5  -3  138.99   21.60
 -15   5   3   89.49   21.60
  13  -5  -3  201.38   20.60
  13  -5  -3  171.98   20.30
 -13  -5   3  183.08   29.30
  13  -5  -3  168.48   21.00
 -13   5   3  204.28   26.80
 -13   5   3  188.78   22.80
  13   5  -3  220.98   24.70
  13   5  -3  206.78   21.90
  13   5  -3  193.08   18.10
 -11  -5   3   20.10   20.00
  11  -5  -3   31.20   12.90
  11  -5  -3   22.30   10.20
  11  -5  -3   37.70   13.30
  11   5  -3   22.80   12.70
 -11   5   3   21.20   11.50
 -11   5   3   40.50   14.10
 -11   5   3   38.10   15.10
  11   5  -3   50.49   13.10
  11   5  -3   15.20   10.90
   9  -5  -3  518.25   21.90
   9  -5  -3  542.05   28.90
   9  -5  -3  507.05   26.20
  -9  -5   3  534.35   36.60
   9  -5  -3  520.75   21.00
   9   5  -3  520.45   24.20
   9   5  -3  474.25   27.20
  -9   5   3  532.75   30.60
  -9   5   3  499.25   22.70
   9   5  -3  513.85   26.00
  -9   5   3  528.75   23.90
  -9   5   3  546.45   19.80
  -9   5   3  505.35   31.70
   7  -5  -3 3172.58   65.69
   7  -5  -3 3175.98   65.69
  -7  -5   3 3194.78   72.39
   7  -5  -3 3138.19   55.49
  -7   5   3 3099.29   74.09
  -7   5   3 3136.69   63.29
  -7   5   3 3166.98   56.39
   7   5  -3 3128.79   59.19
  -7   5   3 3085.79   57.69
  -7   5   3 3189.78   67.39
   7   5  -3 3081.79   64.99
   7   5  -3 3034.10   67.49
   5  -5  -3 4353.86   89.59
   5  -5  -3 4455.75   82.49
   5  -5  -3 4388.86   78.89
  -5  -5   3 4431.26   85.39
  -5   5   3 4462.25   81.29
   5   5  -3 4303.87   81.69
  -5   5   3 4470.05   76.79
  -5   5   3 4466.85   91.09
  -5   5   3 4455.75   80.59
   5   5  -3 4424.16   83.99
   5   5  -3 4300.37   74.39
   3  -5  -3 4339.37   81.29
   3  -5  -3 4273.37   74.09
   3  -5  -3 4428.46   88.99
  -3   5   3 4477.35   81.19
   3   5  -3 4234.48   73.59
  -3   5   3 4561.24   77.79
  -3   5   3 4395.96   89.29
   3   5  -3 4437.96   81.19
   3   5  -3 4402.96   81.59
  -1  -5   3 2664.13   57.59
   1  -5  -3 2591.04   64.49
   1   5  -3 2627.54   50.59
   1   5  -3 2687.53   56.29
  -1   5   3 2589.74   56.89
  -1   5   3 2711.63   54.99
  -1   5   3 2744.93   66.59
   1   5  -3 2729.73   56.39
   1   5  -3 2597.04   50.99
  -1  -5  -3 3574.84   80.39
   1  -5   3 3538.65   69.99
  -1   5  -3 3597.84   66.79
  -1   5  -3 3627.84   64.79
   1   5   3 3578.84   68.19
   1   5   3 3650.73   72.29
  -1   5  -3 3631.94   66.79
  -1   5  -3 3655.33   68.59
   3  -5   3   56.69   12.30
  -3  -5  -3   66.29   19.60
  -3   5  -3   50.49   10.90
   3   5   3   63.39   12.50
  -3   5  -3   57.89    9.60
   3   5   3   48.80   11.60
  -3   5  -3   55.69   11.70
  -3   5  -3   59.29   10.40
  -5  -5  -3   22.30   20.00
   5  -5   3   22.10    9.70
   5  -5   3   19.50   10.50
  -5   5  -3   26.40   10.30
   5   5   3    8.60   10.90
  -5   5  -3   17.10   11.30
   5   5   3   11.30    9.80
  -5   5  -3    8.80    6.40
  -5   5  -3   32.70    9.50
   7  -5   3  342.27   22.70
  -7  -5  -3  311.07   37.30
   7  -5   3  303.87   22.00
   7   5   3  341.97   22.50
  -7   5  -3  310.57   21.20
  -7   5  -3  326.37   26.00
   7   5   3  346.37   24.40
   9  -5   3   74.89   13.60
  -9  -5  -3   81.09   27.10
   9  -5   3   98.19   15.80
  -9   5  -3   90.79   17.20
  -9   5  -3   94.79   14.20
   9   5   3   95.29   15.60
   9   5   3   91.59   16.60
 -11  -5  -3   11.50   27.90
  11  -5   3   68.09   15.60
  11  -5   3   32.20   13.20
 -11   5  -3   48.70   17.80
  11   5   3   51.59   15.10
  11   5   3   56.49   16.30
 -11   5  -3   70.99   17.70
 -11   5  -3   37.40   13.60
 -13  -5  -3   -3.80   31.30
  13  -5   3    6.30   15.10
  13  -5   3    0.20   13.40
 -13   5  -3  -37.80   18.50
  13   5   3  -11.90   14.40
  13   5   3   -0.80   15.20
 -13   5  -3  -14.80   12.30
 -13   5  -3   18.50   17.10
  15  -5   3  155.68   21.80
 -15  -5  -3  213.78   43.80
  15  -5   3  133.39   22.40
 -15   5  -3  171.38   22.70
  15   5   3  189.88   25.10
  15   5   3  186.08   19.30
  15   5   3  192.48   26.00
 -15   5  -3  191.88   27.90
 -15   5  -3  193.18   29.30
  17  -5   3  559.24   38.70
  17  -5   3  617.54   47.00
 -17  -5  -3  468.85   62.89
 -17   5  -3  553.04   38.30
 -17   5  -3  563.54   46.90
  17   5   3  517.85   39.00
  17   5   3  580.54   38.20
 -17   5  -3  616.34   45.50
  19  -5   3  722.33   46.30
  19  -5   3  723.93   52.79
 -19  -5  -3  664.33   70.99
 -19   5  -3  677.33   52.79
  19   5   3  619.54   42.10
 -19   5  -3  589.14   50.79
 -19   5  -3  658.53   45.70
  21  -5   3  496.65   51.99
  21  -5   3  531.15   45.20
 -21  -5  -3  339.77   58.29
 -21   5  -3  450.55   51.09
  21   5   3  444.66   40.00
 -21   5  -3  478.25   51.29
 -23  -5  -3   74.69   50.49
  23  -5   3  135.79   31.40
  23  -5   3  167.78   37.50
 -23   5  -3  170.58   36.60
  26  -6  -3   62.09   32.10
  26  -6  -3  102.89   29.80
 -26  -6   3  -52.19   44.70
  26   6  -3   90.49   26.10
 -26   6   3  101.69   40.10
  26   6  -3   62.99   30.20
 -26   6   3   96.59   37.80
  24  -6  -3   46.50   25.20
 -24  -6   3   25.70   45.60
  24  -6  -3   70.39   31.40
  24   6  -3  133.29   31.80
 -24   6   3  109.69   38.30
  24   6  -3  108.59   25.00
 -24   6   3   92.49   35.90
  22  -6  -3  104.89   30.70
 -22  -6   3   48.40   44.80
  22  -6  -3   65.79   24.20
  22   6  -3  119.69   24.10
 -22   6   3  128.09   35.50
 -22   6   3   83.89   33.40
  22   6  -3   58.39   27.10
 -20  -6   3  -25.90   36.80
  20  -6  -3   21.60   23.00
  20  -6  -3   22.80   20.60
  20   6  -3   68.69   25.50
  20   6  -3   34.30   19.90
 -20   6   3   35.20   28.60
  20   6  -3   22.70   20.20
 -20   6   3   19.40   26.70
 -18  -6   3   23.20   34.90
  18  -6  -3   36.60   21.50
  18  -6  -3   29.60   18.10
  18  -6  -3    3.10   20.80
  18   6  -3   52.69   22.30
  18   6  -3   -6.80   19.10
 -18   6   3   36.20   23.00
 -18   6   3   37.90   26.30
  18   6  -3    0.70   18.70
  16  -6  -3    9.60   17.50
 -16  -6   3  -10.50   28.80
  16  -6  -3   -5.40   17.20
  16  -6  -3   -7.50   14.00
  16   6  -3   16.90   18.10
 -16   6   3   17.60   20.40
 -16   6   3   -5.40   18.10
  16   6  -3  -20.50   14.20
  16   6  -3  -12.20   15.20
  14  -6  -3    9.90   16.00
  14  -6  -3   25.20   13.70
 -14  -6   3   59.79   29.20
  14  -6  -3   22.70   16.40
 -14   6   3   22.00   16.60
  14   6  -3   33.70   14.50
  14   6  -3   29.90   15.90
 -14   6   3   32.90   18.50
  14   6  -3   39.60   14.90
  12  -6  -3   64.59   13.30
 -12  -6   3   65.19   26.50
  12  -6  -3   10.70   15.10
  12  -6  -3   23.80   14.90
 -12   6   3   10.10   13.50
  12   6  -3   45.70   14.60
 -12   6   3   36.00   18.70
  12   6  -3   45.40   15.20
 -12   6   3   27.20   15.80
  12   6  -3   57.29   15.30
  10  -6  -3  272.37   24.10
  10  -6  -3  294.17   20.50
  10  -6  -3  285.17   27.20
 -10  -6   3  290.17   37.10
  10  -6  -3  236.48   19.70
 -10   6   3  253.97   29.20
  10   6  -3  276.77   22.50
 -10   6   3  265.07   21.00
 -10   6   3  281.47   21.50
 -10   6   3  247.78   28.60
  10   6  -3  280.07   24.30
 -10   6   3  241.88   18.30
  10   6  -3  261.97   25.30
   8  -6  -3  469.15   28.30
   8  -6  -3  481.65   34.10
   8  -6  -3  516.05   22.20
   8  -6  -3  479.95   27.20
  -8  -6   3  494.45   37.60
  -8   6   3  446.86   30.30
   8   6  -3  507.85   24.80
   8   6  -3  520.65   27.80
  -8   6   3  483.45   23.20
  -8   6   3  488.85   25.20
   8   6  -3  476.65   28.70
  -8   6   3  481.75   22.50
  -8   6   3  487.05   32.90
   6  -6  -3 1166.58   37.60
   6  -6  -3 1170.68   45.60
   6  -6  -3 1235.68   40.40
  -6  -6   3 1151.98   46.10
   6  -6  -3 1163.18   30.20
   6   6  -3 1148.09   41.10
  -6   6   3 1190.78   34.80
   6   6  -3 1142.09   39.10
  -6   6   3 1213.98   38.30
  -6   6   3 1120.99   30.30
  -6   6   3 1264.77   47.10
  -6   6   3 1189.68   39.30
   6   6  -3 1179.68   33.50
   4  -6  -3 1173.18   44.80
   4  -6  -3 1154.98   38.60
   4  -6  -3 1188.68   35.30
  -4   6   3 1256.37   38.20
   4   6  -3 1175.58   39.50
   4   6  -3 1219.58   32.90
  -4   6   3 1219.78   45.40
  -4   6   3 1224.48   36.50
   4   6  -3 1164.38   38.70
  -4   6   3 1259.87   36.80
   2  -6  -3 1123.99   44.50
  -2  -6   3 1108.69   38.20
   2   6  -3 1159.78   32.40
  -2   6   3 1152.18   45.70
  -2   6   3 1208.58   36.50
  -2   6   3 1193.98   37.80
   2   6  -3 1154.18   38.10
   2   6  -3 1192.08   38.10
   0  -6   3  963.60   35.50
   0  -6  -3  974.10   42.80
   0   6  -3  985.20   34.30
   0   6  -3  966.80   32.90
   0   6   3 1059.99   34.70
   0   6  -3 1003.50   30.90
   0   6  -3  941.71   30.50
   0   6   3 1011.70   36.10
   2  -6   3  759.02   32.40
  -2  -6  -3  780.32   40.70
  -2   6  -3  794.72   30.80
   2   6   3  794.82   33.30
  -2   6  -3  790.62   28.70
  -2   6  -3  789.52   30.70
   2   6   3  814.12   32.30
  -2   6  -3  825.12   29.00
  -4  -6  -3  115.19   24.80
   4  -6   3  116.49   16.40
   4   6   3  133.49   17.50
  -4   6  -3  102.39   12.90
   4   6   3  126.79   16.40
  -4   6  -3  126.79   14.80
  -4   6  -3  133.09   16.50
  -4   6  -3  119.49   15.40
   6  -6   3   33.90   12.40
   6  -6   3   34.60   11.00
  -6  -6  -3   55.49   24.60
   6  -6   3   29.30   12.30
   6   6   3   37.10   13.40
   6   6   3   28.10   13.30
  -6   6  -3   20.50    8.40
  -6   6  -3   19.00   10.90
  -6   6  -3   48.70   12.30
  -6   6  -3   41.70   14.30
   8  -6   3   85.29   14.30
   8  -6   3   80.19   15.40
  -8  -6  -3   74.69   28.00
  -8   6  -3   43.40   14.60
  -8   6  -3   84.39   13.70
   8   6   3   76.19   15.40
   8   6   3  100.39   16.80
 -10  -6  -3  111.69   32.10
  10  -6   3  110.49   17.80
  10  -6   3   98.79   15.70
 -10   6  -3  115.69   16.30
 -10   6  -3  111.09   19.70
  10   6   3  123.09   19.90
  10   6   3   85.89   17.50
 -10   6  -3   82.59   19.10
  12  -6   3   51.29   16.70
  12  -6   3   78.49   17.20
 -12  -6  -3   68.29   35.30
  12   6   3   51.19   18.50
 -12   6  -3   21.90   21.00
  12   6   3   55.39   19.00
 -12   6  -3   50.79   16.90
 -12   6  -3   54.39   19.80
  14  -6   3  113.39   21.40
  14  -6   3  133.79   22.00
 -14  -6  -3  137.59   42.90
  14   6   3  115.99   23.00
 -14   6  -3  113.39   24.80
 -14   6  -3  121.09   26.60
 -14   6  -3   90.79   20.60
  16  -6   3  104.09   23.60
 -16  -6  -3   49.80   43.40
  16  -6   3  123.79   27.50
 -16   6  -3   87.89   26.70
  16   6   3  126.59   25.30
  16   6   3   87.59   24.30
 -16   6  -3   84.19   23.70
 -16   6  -3  125.69   28.80
  18  -6   3  172.08   31.20
 -18  -6  -3  164.58   49.80
  18  -6   3  158.58   28.00
  18   6   3  136.99   26.30
 -18   6  -3  176.78   35.20
 -18   6  -3  146.49   32.20
  18   6   3  162.18   28.80
 -18   6  -3  205.78   29.70
 -20  -6  -3  148.49   53.09
  20  -6   3  123.89   32.70
  20  -6   3  154.48   29.80
 -20   6  -3  151.28   33.90
 -20   6  -3  127.89   30.60
  20   6   3  136.99   27.90
  22  -6   3   60.79   33.30
 -22  -6  -3   -5.60   50.19
  22  -6   3   69.69   28.00
 -22   6  -3   85.59   34.60
  22   6   3   64.89   34.40
  25  -7  -3   39.10   25.30
  25  -7  -3   23.20   29.80
 -25  -7   3  -43.70   45.10
 -25   7   3   35.70   34.50
  25   7  -3  -19.10   33.20
  25   7  -3    2.40   28.40
 -25   7   3   55.59   33.40
  23  -7  -3   33.20   24.70
 -23  -7   3  -77.79   40.60
  23  -7  -3   24.50   27.50
 -23   7   3   53.69   33.10
 -23   7   3   90.59   33.60
  23   7  -3   12.10   21.90
  23   7  -3  -12.20   27.00
 -21  -7   3  -38.80   40.40
  21  -7  -3  -13.00   21.40
  21  -7  -3   33.70   26.90
  21   7  -3   38.10   28.10
  21   7  -3   44.90   21.10
  21   7  -3   35.70   28.10
 -21   7   3   46.50   31.00
 -21   7   3   33.40   29.00
  19  -7  -3  431.16   46.50
 -19  -7   3  285.27   50.99
  19  -7  -3  364.86   36.30
 -19   7   3  403.96   44.90
  19   7  -3  332.17   34.60
  19   7  -3  425.86   36.10
 -19   7   3  426.26   48.70
  19   7  -3  421.96   42.00
 -17  -7   3  253.17   44.30
  17  -7  -3  215.98   30.40
  17  -7  -3  220.78   27.90
  17  -7  -3  379.06   33.50
  17   7  -3  351.56   34.60
 -17   7   3  248.58   34.30
  17   7  -3  188.88   27.20
  15  -7  -3  545.45   42.50
 -15  -7   3  553.24   55.99
  15  -7  -3  601.84   34.20
  15  -7  -3  499.25   35.80
 -15   7   3  485.25   44.10
  15   7  -3  497.05   35.40
 -15   7   3  563.64   36.50
  15   7  -3  577.84   40.90
  15   7  -3  565.44   35.60
 -15   7   3  527.85   44.40
  13  -7  -3  472.75   33.30
 -13  -7   3  505.55   51.19
  13  -7  -3  516.55   39.10
  13  -7  -3  552.74   30.10
 -13   7   3  519.25   31.70
  13   7  -3  495.05   33.00
  13   7  -3  523.65   31.20
 -13   7   3  549.05   41.00
  13   7  -3  533.05   36.60
 -13   7   3  489.75   39.80
  11  -7  -3  442.26   27.20
 -11  -7   3  478.65   46.10
  11  -7  -3  455.45   31.70
  11  -7  -3  522.15   26.90
  11  -7  -3  492.95   34.70
 -11   7   3  481.75   27.60
  11   7  -3  475.25   28.70
 -11   7   3  473.25   25.10
  11   7  -3  484.25   30.90
  11   7  -3  480.45   34.30
 -11   7   3  508.65   37.00
 -11   7   3  518.25   38.30
 -11   7   3  474.45   28.80
   9  -7  -3  163.88   20.60
   9  -7  -3  136.09   25.10
  -9  -7   3  134.89   29.70
   9  -7  -3  127.69   17.70
   9  -7  -3  138.09   15.30
   9  -7  -3  128.29   18.70
  -9   7   3  116.49   16.90
  -9   7   3  164.98   26.00
  -9   7   3  130.19   15.80
  -9   7   3  129.99   17.50
   9   7  -3  166.28   20.10
  -9   7   3  101.29   20.40
   9   7  -3  167.18   17.40
   9   7  -3  143.09   20.80
   7  -7  -3   67.89   16.70
   7  -7  -3   87.49   20.70
   7  -7  -3   67.89   14.80
  -7  -7   3   51.59   24.10
   7   7  -3   82.99   13.70
  -7   7   3   66.99   14.60
  -7   7   3   62.39   14.10
  -7   7   3   67.79   19.80
   7   7  -3   55.19   16.80
   7   7  -3   83.49   16.00
  -7   7   3   71.69   16.30
   5  -7  -3   18.10   10.40
  -5  -7   3    8.70   18.50
   5  -7  -3   18.10   15.60
   5  -7  -3   26.40   13.20
  -5   7   3   21.70   10.10
  -5   7   3   24.20   15.40
   5   7  -3   20.20   11.60
   5   7  -3   27.80   10.50
  -5   7   3   32.50   12.60
   5   7  -3   10.10   12.40
  -5   7   3   30.10   11.90
   3  -7  -3   34.70   17.10
   3  -7  -3   20.30   14.60
   3  -7  -3   16.30    9.20
   3   7  -3   46.00   13.70
  -3   7   3   35.60   17.20
   3   7  -3   19.80   11.70
   3   7  -3   39.60   11.10
  -3   7   3   36.40   11.60
  -3   7   3   25.40   10.70
  -3   7   3   31.90   12.30
   1  -7  -3   48.00   18.00
  -1  -7   3   40.50   13.30
  -1   7   3   65.29   13.70
   1   7  -3   45.00   10.70
  -1   7   3   58.69   19.10
   1   7  -3   32.50   11.40
   1   7  -3   58.69   13.10
   1   7  -3   57.39   13.70
  -1   7   3   43.90   13.20
   1  -7   3  169.28   20.30
  -1  -7  -3  198.18   30.00
   1   7   3  231.38   23.00
  -1   7  -3  210.68   20.50
   1   7   3  206.28   22.40
  -1   7  -3  210.88   21.00
  -1   7  -3  167.68   19.40
  -1   7  -3  222.98   20.00
   3  -7   3  140.59   20.80
  -3  -7  -3  166.48   27.70
   3   7   3  162.18   19.20
  -3   7  -3  158.98   18.10
   3   7   3  182.08   22.80
  -3   7  -3  179.98   17.50
  -3   7  -3  183.48   19.50
  -3   7  -3  141.49   18.40
  -5  -7  -3  535.45   44.10
   5  -7   3  465.05   26.50
   5  -7   3  449.46   30.20
   5   7   3  488.75   31.00
  -5   7  -3  472.95   31.10
  -5   7  -3  480.15   27.20
   5   7   3  446.36   29.80
  -5   7  -3  442.36   28.00
  -5   7  -3  465.75   23.90
   7  -7   3  674.83   33.00
  -7  -7  -3  665.03   50.69
   7  -7   3  696.43   33.50
   7  -7   3  639.54   28.80
  -7   7  -3  699.83   38.00
  -7   7  -3  693.83   31.50
   7   7   3  660.73   34.70
  -7   7  -3  656.33   27.30
   7   7   3  654.53   36.20
  -7   7  -3  692.93   32.90
   9  -7   3  611.54   34.50
  -9  -7  -3  570.44   56.09
   9  -7   3  677.03   34.60
  -9   7  -3  669.93   34.50
  -9   7  -3  610.04   31.10
  -9   7  -3  633.24   40.20
   9   7   3  602.84   35.40
   9   7   3  618.44   37.60
  11  -7   3  507.75   34.50
 -11  -7  -3  473.15   60.39
  11  -7   3  592.54   35.30
 -11   7  -3  459.25   37.60
 -11   7  -3  537.95   40.90
  11   7   3  493.65   37.00
 -11   7  -3  526.65   34.30
  11   7   3  536.55   35.60
  13  -7   3  121.19   22.50
 -13  -7  -3  159.88   46.50
  13  -7   3  138.49   22.70
  13  -7   3  104.19   24.90
 -13   7  -3  151.38   27.60
 -13   7  -3  155.48   27.00
 -13   7  -3  149.49   23.70
  13   7   3  150.38   26.20
  13   7   3  144.69   24.00
  15  -7   3   83.49   29.70
 -15  -7  -3   32.20   45.00
  15  -7   3   76.39   23.60
  15  -7   3   85.79   26.00
 -15   7  -3   59.69   26.50
  15   7   3   76.89   23.70
  15   7   3   75.29   23.00
 -15   7  -3  133.09   36.60
 -15   7  -3   87.49   23.30
 -17  -7  -3  -34.00   46.00
  17  -7   3   43.10   22.90
  17  -7   3   21.30   25.50
  17   7   3   20.90   22.00
 -17   7  -3   -5.70   22.00
  17   7   3    9.90   20.90
 -17   7  -3   -4.30   25.40
  19  -7   3    9.10   24.40
 -19  -7  -3  -78.09   45.40
  19  -7   3   33.30   27.80
  19   7   3    8.90   23.20
 -19   7  -3   -3.80   27.40
  19   7   3  -14.80   21.30
 -19   7  -3   -1.00   24.60
 -21  -7  -3  -79.29   48.80
  21  -7   3   20.90   27.80
  21  -7   3   15.10   26.40
  21   7   3   18.30   24.40
 -21   7  -3   84.59   32.20
 -21   7  -3   -4.20   27.70
  24  -8  -3   15.70   30.20
 -24  -8   3  -62.79   45.50
  24  -8  -3   32.90   25.20
 -24   8   3   28.60   33.30
  24   8  -3   46.50   29.90
 -24   8   3   74.29   34.90
 -22  -8   3  -87.29   40.90
  22  -8  -3    2.40   26.80
  22  -8  -3   32.60   24.00
 -22   8   3   22.30   31.10
  22   8  -3   27.10   28.40
 -22   8   3  -12.50   29.60
  20  -8  -3  113.49   25.80
  20  -8  -3  106.69   28.30
 -20  -8   3   30.20   45.80
 -20   8   3  116.79   33.90
 -20   8   3  132.49   36.10
  20   8  -3   84.69   23.60
  20   8  -3  102.99   30.50
  20   8  -3   84.79   25.30
  18  -8  -3  588.54   49.40
  18  -8  -3  530.25   39.70
 -18   8   3  573.34   50.19
  18   8  -3  498.55   45.60
 -18   8   3  607.94   52.99
  18   8  -3  483.15   38.50
  18   8  -3  563.44   39.90
 -16  -8   3  478.35   60.79
  16  -8  -3  524.25   39.70
  16  -8  -3  527.05   46.70
  16  -8  -3  533.35   37.70
  16   8  -3  488.15   38.30
 -16   8   3  553.04   49.40
 -16   8   3  600.64   48.80
  16   8  -3  586.84   37.60
  16   8  -3  516.05   43.10
  14  -8  -3  464.85   33.60
  14  -8  -3  474.25   42.50
  14  -8  -3  428.76   35.90
 -14  -8   3  438.16   58.29
 -14   8   3  514.15   45.10
  14   8  -3  433.86   39.60
 -14   8   3  521.85   45.70
  14   8  -3  515.55   34.60
  14   8  -3  445.16   36.30
 -14   8   3  478.85   34.10
  12  -8  -3  339.27   37.40
  12  -8  -3  433.66   31.00
  12  -8  -3  446.96   29.50
 -12  -8   3  398.76   51.89
  12  -8  -3  420.86   34.10
  12  -8  -3  435.56   43.40
 -12   8   3  387.36   39.60
  12   8  -3  462.85   31.20
 -12   8   3  440.76   41.00
  12   8  -3  444.66   36.10
 -12   8   3  464.95   30.20
 -12   8   3  401.46   29.80
  12   8  -3  360.36   33.40
  10  -8  -3   69.19   23.50
  10  -8  -3   73.79   15.10
  10  -8  -3   83.39   17.70
  10  -8  -3   51.99   17.70
 -10  -8   3   89.99   32.00
  10  -8  -3   83.89   19.60
 -10   8   3   81.69   21.20
 -10   8   3   76.39   15.30
  10   8  -3   90.29   18.60
 -10   8   3   99.29   24.40
  10   8  -3   84.29   16.70
  10   8  -3   76.99   20.10
 -10   8   3   94.79   17.00
 -10   8   3   60.39   16.40
   8  -8  -3   25.00   11.80
   8  -8  -3   36.10   16.80
   8  -8  -3   36.10   15.20
   8  -8  -3    8.60   20.30
  -8  -8   3   33.50   25.80
   8  -8  -3    9.10   15.10
  -8   8   3   17.10   14.90
   8   8  -3   33.70   14.40
  -8   8   3   27.30   20.50
  -8   8   3   19.60   12.40
  -8   8   3   18.60   14.80
   8   8  -3   13.10   14.00
  -8   8   3   23.40   16.90
   8   8  -3   24.60   15.40
   6  -8  -3  250.97   23.70
   6  -8  -3  203.78   24.00
   6  -8  -3  167.88   26.60
  -6  -8   3  194.78   30.20
   6   8  -3  160.58   22.30
  -6   8   3  169.68   20.90
   6   8  -3  176.98   18.40
  -6   8   3  213.48   30.70
   6   8  -3  221.78   24.10
  -6   8   3  161.58   20.40
  -6   8   3  177.78   21.30
  -4  -8   3  242.48   30.50
   4  -8  -3  236.78   21.70
   4  -8  -3  226.98   31.20
   4  -8  -3  229.08   24.70
   4   8  -3  226.98   22.70
  -4   8   3  247.68   25.50
  -4   8   3  248.38   32.40
  -4   8   3  219.48   25.30
   4   8  -3  257.97   25.80
   4   8  -3  266.27   25.40
  -4   8   3  216.38   23.20
   2  -8  -3  213.78   30.40
  -2  -8   3  161.88   20.40
  -2   8   3  182.88   22.70
  -2   8   3  196.08   28.50
   2   8  -3  166.88   17.80
   2   8  -3  214.68   23.40
   2   8  -3  150.38   20.00
  -2   8   3  222.18   24.70
   0  -8  -3   25.10   19.40
   0  -8   3   40.50   15.80
   0   8   3   44.60   15.70
   0   8  -3   21.90   13.80
   0   8  -3   42.10   12.00
   0   8  -3   28.30   13.10
   0   8   3   18.30   14.20
   0   8  -3   39.80   13.10
  -2  -8  -3   17.70   20.50
   2  -8   3   -6.50   13.50
  -2   8  -3    7.30   12.50
   2   8   3  -18.10   13.40
  -2   8  -3   12.70   13.10
   2   8   3    2.40   13.70
  -2   8  -3   -8.50   11.50
   4  -8   3   27.70   17.20
  -4  -8  -3   44.70   26.60
   4   8   3    8.00   15.60
  -4   8  -3   15.40   15.60
  -4   8  -3   39.80   12.80
  -4   8  -3   35.10   16.40
   4   8   3   10.60   16.80
  -4   8  -3   40.60   15.90
   6  -8   3  560.74   30.90
  -6  -8  -3  601.44   52.39
   6  -8   3  640.84   34.90
   6  -8   3  632.24   36.60
  -6   8  -3  619.14   33.90
  -6   8  -3  663.03   38.10
  -6   8  -3  648.44   34.10
   6   8   3  625.24   36.50
  -6   8  -3  637.84   30.20
   6   8   3  583.64   37.90
   8  -8   3 1265.27   46.60
   8  -8   3 1111.49   43.40
   8  -8   3 1318.97   46.80
  -8  -8  -3 1122.89   68.69
   8   8   3 1216.88   49.00
   8   8   3 1186.88   51.09
  -8   8  -3 1285.47   44.50
  -8   8  -3 1308.97   51.99
  -8   8  -3 1228.98   45.60
 -10  -8  -3  495.75   63.29
  10  -8   3  564.74   37.00
  10  -8   3  590.24   38.10
  10   8   3  565.54   38.20
 -10   8  -3  610.94   43.30
 -10   8  -3  610.54   33.50
 -10   8  -3  587.84   37.50
  10   8   3  530.75   40.10
  12  -8   3  572.14   38.00
  12  -8   3  499.05   43.70
  12  -8   3  453.25   36.50
 -12  -8  -3  531.65   65.89
 -12   8  -3  471.35   44.20
 -12   8  -3  508.25   37.20
  12   8   3  451.65   37.40
  12   8   3  475.15   39.70
  14  -8   3   45.70   21.10
  14  -8   3   52.59   22.10
  14  -8   3   41.70   24.90
 -14  -8  -3   29.60   44.30
 -14   8  -3   70.99   23.20
 -14   8  -3   57.19   28.20
  14   8   3   42.20   22.90
  14   8   3   34.40   21.30
  16  -8   3    7.30   24.80
 -16  -8  -3   19.80   48.40
  16  -8   3   10.10   22.80
  16   8   3   31.30   23.50
 -16   8  -3   75.99   25.90
 -16   8  -3   15.00   26.60
  16   8   3   25.20   22.60
  18  -8   3   52.39   29.20
 -18  -8  -3  -32.70   50.39
  18  -8   3   17.40   25.10
  18   8   3   46.60   26.40
 -18   8  -3   20.20   26.10
 -18   8  -3   56.19   29.70
  18   8   3   -1.60   23.60
  20  -8   3   90.09   30.00
  20  -8   3   53.39   30.90
 -20  -8  -3  -18.10   54.39
 -20   8  -3   57.29   30.20
 -20   8  -3  131.49   36.10
  20   8   3   71.69   40.60
  20   8   3   51.79   27.70
 -21  -9   3  -58.19   44.30
  21  -9  -3   -6.40   23.10
  21  -9  -3   19.40   28.50
  21   9  -3   38.30   28.80
 -21   9   3   18.70   31.70
  21   9  -3   19.70   23.80
 -21   9   3   21.70   32.90
  19  -9  -3   86.69   28.50
 -19  -9   3  -33.40   42.00
  19  -9  -3   62.79   24.50
 -19   9   3   87.69   33.10
  19   9  -3   50.09   23.60
  19   9  -3   73.09   29.70
 -19   9   3   40.80   31.10
 -17  -9   3   72.39   45.50
  17  -9  -3  105.99   24.10
  17  -9  -3  168.18   30.50
  17   9  -3   85.89   24.20
 -17   9   3  161.98   33.50
  17   9  -3   72.19   27.60
 -17   9   3  189.58   34.00
  15  -9  -3  112.29   23.50
 -15  -9   3  111.09   45.70
  15  -9  -3  186.18   36.50
  15  -9  -3  166.28   28.20
  15  -9  -3  137.29   26.70
 -15   9   3  196.58   32.20
 -15   9   3  165.08   32.00
  15   9  -3  102.39   21.30
 -15   9   3  124.69   24.80
  15   9  -3  102.69   28.20
  15   9  -3  149.59   25.70
 -13  -9   3   29.20   39.80
  13  -9  -3   53.09   22.70
  13  -9  -3   73.59   30.80
  13  -9  -3   61.59   23.10
  13  -9  -3   46.80   19.30
 -13   9   3   55.09   19.10
 -13   9   3   44.70   24.70
 -13   9   3   80.89   19.80
 -13   9   3   53.79   26.60
  13   9  -3   62.89   24.40
  13   9  -3   71.69   22.90
  13   9  -3   57.69   19.60
  11  -9  -3  163.08   22.70
  11  -9  -3   84.29   23.20
  11  -9  -3  199.58   27.30
  11  -9  -3  169.98   32.70
  11  -9  -3  145.79   20.10
 -11  -9   3  117.69   40.40
 -11   9   3  152.68   22.10
  11   9  -3  151.58   24.70
  11   9  -3  130.69   25.20
  11   9  -3  162.08   21.70
 -11   9   3  170.38   23.00
 -11   9   3  156.28   26.70
 -11   9   3  147.79   20.20
 -11   9   3  188.68   32.70
  -9  -9   3   22.70   31.80
   9  -9  -3   41.80   17.30
   9  -9  -3    9.80   24.60
   9  -9  -3   -6.30   17.60
   9  -9  -3   48.80   20.10
   9  -9  -3   42.60   15.70
   9   9  -3   35.60   19.60
  -9   9   3   42.80   15.80
  -9   9   3   62.69   17.90
   9   9  -3   21.30   16.10
  -9   9   3   39.40   24.90
  -9   9   3   40.20   19.20
  -9   9   3   34.40   17.10
   9   9  -3   12.50   18.80
   7  -9  -3   74.09   17.80
   7  -9  -3  109.19   22.90
  -7  -9   3   91.09   30.70
   7  -9  -3   66.19   26.30
   7   9  -3   78.49   19.50
   7   9  -3   70.99   21.00
  -7   9   3   92.89   26.80
  -7   9   3   74.19   19.70
  -7   9   3   97.69   19.80
  -7   9   3   86.19   20.20
   7   9  -3   81.59   18.30
   5  -9  -3   72.89   15.60
  -5  -9   3   40.10   23.70
   5  -9  -3   43.60   23.40
   5  -9  -3   40.00   19.10
  -5   9   3   23.20   18.00
  -5   9   3   37.50   16.40
  -5   9   3   54.09   23.90
   5   9  -3   69.89   18.20
   5   9  -3   24.80   15.40
  -5   9   3   55.39   18.90
   5   9  -3   55.39   18.90
   3  -9  -3    5.20   21.90
  -3  -9   3   28.30   15.40
   3  -9  -3   22.60   19.00
  -3   9   3   -6.00   15.70
  -3   9   3   20.30   22.80
   3   9  -3   31.50   16.20
   3   9  -3   20.00   14.90
  -3   9   3   16.20   15.70
   3   9  -3   28.30   16.40
  -1  -9   3  103.69   20.70
   1  -9  -3   92.09   27.00
   1   9  -3   76.09   16.80
  -1   9   3   85.39   19.90
  -1   9   3  119.59   21.70
   1   9  -3   98.09   20.70
   1   9  -3   97.89   19.50
  -1  -9  -3   58.49   25.60
   1  -9   3   81.99   19.90
  -1   9  -3   27.60   15.60
  -1   9  -3   36.10   15.50
   1   9   3   28.10   16.50
  -1   9  -3   10.00   13.90
  -1   9  -3   40.20   16.10
   1   9   3   20.60   19.00
  -3  -9  -3  153.78   34.40
   3  -9   3   98.69   22.00
   3   9   3  175.98   26.80
  -3   9  -3   84.69   18.00
  -3   9  -3   89.29   20.50
  -3   9  -3  123.89   21.60
  -3   9  -3   73.99   17.80
   3   9   3   94.39   21.20
   5  -9   3  134.19   24.60
  -5  -9  -3  116.09   35.30
   5  -9   3  143.49   23.70
  -5   9  -3  111.39   20.40
  -5   9  -3  113.49   18.90
  -5   9  -3  122.59   20.70
   5   9   3  103.59   23.60
  -5   9  -3  117.79   21.40
   5   9   3   97.79   22.10
   7  -9   3  183.48   22.80
   7  -9   3  160.98   22.60
   7  -9   3  148.29   26.60
  -7  -9  -3  166.98   39.60
  -7   9  -3  168.18   23.40
   7   9   3  152.18   24.30
  -7   9  -3  273.67   33.30
   7   9   3  158.38   26.40
  -7   9  -3  151.78   22.60
  -7   9  -3  180.78   24.40
   9  -9   3   16.10   22.40
  -9  -9  -3   92.59   40.60
   9  -9   3   61.89   21.00
   9   9   3   84.19   22.00
  -9   9  -3   83.09   20.00
  -9   9  -3   82.79   21.00
  -9   9  -3   80.69   24.00
   9   9   3   53.39   21.80
  11  -9   3  111.09   23.10
  11  -9   3  139.49   27.60
  11  -9   3  224.38   29.50
 -11  -9  -3  102.89   43.30
  11   9   3  149.99   25.30
 -11   9  -3  117.49   28.10
  11   9   3  108.19   26.20
 -11   9  -3  122.59   24.80
  13  -9   3   12.80   22.40
  13  -9   3   -2.40   21.80
 -13  -9  -3  -34.30   43.10
  13  -9   3   40.70   22.70
 -13   9  -3    7.70   22.40
 -13   9  -3    5.10   24.50
  13   9   3    2.70   21.70
  13   9   3  -12.30   22.00
  15  -9   3   85.79   26.70
 -15  -9  -3   44.90   50.49
  15  -9   3  120.19   28.50
  15   9   3  102.89   26.50
 -15   9  -3  144.29   32.00
  15   9   3   63.99   26.70
 -15   9  -3  107.09   27.80
  17  -9   3    0.00   26.20
 -17  -9  -3  -56.29   51.09
  17  -9   3   27.20   28.70
  17   9   3   -7.30   24.20
  17   9   3   18.80   26.60
 -17   9  -3   15.90   28.90
 -17   9  -3   38.40   27.70
 -19  -9  -3  -54.49   53.69
  19  -9   3   25.70   26.60
  19  -9   3   24.20   30.10
 -19   9  -3   27.70   31.30
  19   9   3  -26.50   24.80
 -19   9  -3  -13.80   27.00
  19   9   3   19.50   27.20
  20 -10  -3   70.09   29.70
 -20 -10   3  -66.69   44.90
  20 -10  -3   31.80   24.80
  20  10  -3   61.79   30.90
  20  10  -3   53.29   26.00
 -20  10   3   43.20   33.10
 -20  10   3   49.10   33.20
 -18 -10   3  -36.00   43.00
  18 -10  -3   35.10   25.90
  18 -10  -3   12.30   36.20
  18 -10  -3   40.00   23.60
  18  10  -3   59.89   28.20
 -18  10   3   28.50   31.50
 -18  10   3   98.19   32.20
  18  10  -3   22.10   23.80
  16 -10  -3   26.00   23.70
  16 -10  -3   -3.80   32.70
 -16 -10   3   23.30   43.80
  16 -10  -3    9.60   20.20
 -16  10   3   35.20   28.10
  16  10  -3   41.50   22.30
 -16  10   3   16.90   24.60
  16  10  -3   52.09   26.90
 -16  10   3   31.80   29.50
  14 -10  -3    0.90   17.70
  14 -10  -3   57.09   29.50
  14 -10  -3    5.30   21.70
  14 -10  -3   19.10   20.20
 -14 -10   3  -68.99   39.00
 -14  10   3   16.20   18.00
  14  10  -3   17.20   19.70
  14  10  -3    7.10   21.40
 -14  10   3   14.80   22.90
 -14  10   3    1.40   19.40
 -14  10   3  -33.20   25.20
  12 -10  -3   37.00   28.30
  12 -10  -3   21.10   18.50
  12 -10  -3    2.00   16.30
  12 -10  -3   -1.50   21.50
 -12 -10   3  -35.60   36.20
 -12  10   3    8.50   25.30
  12  10  -3   -2.50   20.90
 -12  10   3   11.80   17.00
 -12  10   3   -4.50   16.90
 -12  10   3   29.40   22.30
  12  10  -3   30.80   21.10
  10 -10  -3   16.30   22.40
 -10 -10   3   -3.70   34.70
  10 -10  -3   38.20   18.80
  10 -10  -3   15.80   16.70
  10 -10  -3   11.20   18.50
  10 -10  -3   36.50   29.20
  10  10  -3   27.30   18.00
 -10  10   3   37.50   17.30
  10  10  -3    1.70   19.80
 -10  10   3   59.19   28.90
 -10  10   3   53.59   21.60
 -10  10   3  -10.50   20.10
  10  10  -3   52.19   22.80
 -10  10   3    3.40   17.90
   8 -10  -3  -32.90   25.40
  -8 -10   3    8.60   32.20
   8 -10  -3   10.40   17.20
   8 -10  -3  -42.90   15.50
   8 -10  -3   -1.10   21.10
   8  10  -3   -8.60   16.50
   8  10  -3  -19.30   19.30
  -8  10   3   16.80   17.60
  -8  10   3    2.30   25.30
  -8  10   3   11.30   18.60
  -8  10   3   -7.10   17.20
   8  10  -3  -32.10   17.90
   6 -10  -3  -33.10   22.00
   6 -10  -3   46.20   28.10
  -6 -10   3   62.89   29.90
   6 -10  -3   28.50   22.50
  -6  10   3   53.99   18.90
  -6  10   3   62.89   28.90
  -6  10   3   15.70   18.90
   6  10  -3  -10.90   18.70
   6  10  -3   30.40   17.80
   6  10  -3    2.00   18.90
   4 -10  -3  133.59   31.90
  -4 -10   3  116.99   23.80
   4 -10  -3   85.59   26.10
  -4 -10   3   99.49   29.20
  -4  10   3  124.39   23.80
   4  10  -3  109.89   20.60
  -4  10   3   70.09   22.10
   4  10  -3   75.09   23.40
  -4  10   3  125.19   32.70
   4  10  -3   81.99   22.10
   2 -10  -3   61.69   29.70
   2 -10  -3   36.00   27.00
  -2 -10   3   88.89   20.80
   2  10  -3  144.69   23.90
  -2  10   3   68.89   21.10
   2  10  -3   94.59   19.20
  -2  10   3   76.49   23.20
   2  10  -3   55.69   20.10
   0 -10   3  130.79   23.80
   0 -10  -3  109.29   31.60
   0  10  -3  122.69   23.20
   0  10   3   89.29   24.80
   0  10   3   80.59   22.10
   0  10  -3  128.99   21.20
   0  10  -3  109.89   23.00
   2 -10   3   35.00   21.20
  -2 -10  -3   65.79   31.90
  -2  10  -3   53.69   19.40
  -2  10  -3   41.00   19.10
  -2  10  -3   84.89   20.00
   2  10   3   18.90   21.30
   2  10   3   55.49   21.30
   4 -10   3  -13.90   22.00
  -4 -10  -3   56.29   33.00
  -4  10  -3   40.50   17.90
  -4  10  -3   21.10   17.80
   4  10   3   10.70   21.90
  -4  10  -3    9.30   18.40
  -4  10  -3   12.80   17.60
   4  10   3   32.60   20.40
  -6 -10  -3   72.39   35.50
   6 -10   3   78.99   25.00
   6 -10   3   62.19   20.40
   6 -10   3   47.90   21.00
   6 -10   3   52.69   20.70
  -6  10  -3   46.80   19.00
   6  10   3   44.60   21.70
  -6  10  -3   42.00   19.50
  -6  10  -3   70.59   20.90
  -6  10  -3   46.80   20.60
   6  10   3   39.10   21.40
  -8 -10  -3   87.09   40.80
   8 -10   3  105.79   25.30
   8 -10   3   84.09   21.70
   8 -10   3   96.89   22.80
   8  10   3   77.09   24.40
  -8  10  -3   86.09   21.70
  -8  10  -3   74.69   21.60
   8  10   3   90.29   24.60
  -8  10  -3  108.29   24.60
  10 -10   3   -2.60   21.10
 -10 -10  -3  -26.60   41.00
  10 -10   3   -2.50   23.20
  10 -10   3    7.10   19.80
 -10  10  -3    5.10   22.00
  10  10   3   14.40   21.30
 -10  10  -3  -22.10   18.60
 -10  10  -3  -22.70   21.30
  10  10   3   -6.00   22.00
 -12 -10  -3   -0.60   45.10
  12 -10   3   81.09   24.60
  12 -10   3   62.69   27.30
  12 -10   3   76.79   25.00
 -12  10  -3   83.79   25.80
 -12  10  -3  115.39   29.30
  12  10   3   59.89   24.90
  12  10   3   87.29   26.90
  14 -10   3   18.40   25.20
 -14 -10  -3  -16.60   47.60
  14 -10   3   32.40   25.60
 -14  10  -3   67.19   28.20
  14  10   3    7.80   24.80
  14  10   3   19.80   26.40
 -14  10  -3   33.60   25.30
  16 -10   3   62.39   28.10
 -16 -10  -3   14.60   53.09
  16 -10   3   38.40   28.70
 -16  10  -3   65.79   27.80
  16  10   3   17.00   27.30
 -16  10  -3   60.49   30.80
  16  10   3   25.40   27.30
  19 -11  -3   85.99   29.90
  19 -11  -3  116.29   28.40
 -19 -11   3  -21.30   48.10
  19 -11  -3   43.10   40.40
 -19  11   3   56.69   36.80
  19  11  -3  116.49   34.70
  19  11  -3   53.59   26.50
 -19  11   3  141.59   37.20
  17 -11  -3  147.39   43.60
  17 -11  -3  115.09   27.00
  17 -11  -3  201.18   33.90
 -17 -11   3   49.70   51.99
  17  11  -3  127.79   29.20
 -17  11   3  103.29   37.90
  17  11  -3  156.08   34.10
 -17  11   3  161.08   37.70
  15 -11  -3   95.89   27.10
  15 -11  -3  115.59   40.20
 -15 -11   3   62.49   48.00
  15 -11  -3   53.19   30.90
  15  11  -3   81.19   29.60
 -15  11   3  107.99   32.10
 -15  11   3   76.09   34.60
  15  11  -3   55.59   26.90
  13 -11  -3   75.39   27.70
 -13 -11   3   61.99   45.10
  13 -11  -3   92.49   24.50
  13 -11  -3  108.59   36.40
 -13  11   3  106.19   29.10
 -13  11   3  122.89   34.80
  13  11  -3  129.59   28.40
 -13  11   3   79.79   22.80
  13  11  -3   95.99   27.20
  11 -11  -3   17.00   19.60
  11 -11  -3   57.89   31.40
  11 -11  -3   34.20   24.70
 -11 -11   3   42.60   39.60
  11  11  -3   48.90   24.20
 -11  11   3   48.30   31.00
  11  11  -3   48.90   23.40
 -11  11   3   36.10   24.40
 -11  11   3    9.40   20.30
   9 -11  -3   55.39   24.50
  -9 -11   3   63.49   36.40
   9 -11  -3   74.59   32.00
   9 -11  -3   86.19   23.10
  -9  11   3   39.10   21.60
   9  11  -3   31.10   22.30
  -9  11   3   68.79   22.30
   9  11  -3   50.49   23.40
  -9  11   3   72.69   31.80
   7 -11  -3    5.20   27.30
   7 -11  -3   -6.70   22.00
   7 -11  -3   -3.80   19.30
  -7 -11   3   10.50   30.60
  -7  11   3  -21.80   19.70
  -7  11   3   -2.10   19.30
   7  11  -3  -16.80   19.30
  -7  11   3   30.50   28.80
   7  11  -3    4.70   21.40
   5 -11  -3  380.66   44.90
  -5 -11   3  352.16   45.30
   5 -11  -3  243.08   32.40
   5  11  -3  236.38   31.70
   5  11  -3  344.97   31.70
   5  11  -3  252.07   32.10
  -5  11   3  314.97   47.00
  -5  11   3  284.87   34.50
  -5  11   3  326.67   35.80
  -3 -11   3   23.50   20.70
   3 -11  -3   33.10   29.00
   3 -11  -3  -25.30   22.80
   3  11  -3    5.60   19.20
  -3  11   3   30.30   21.80
   3  11  -3   11.50   17.00
   3  11  -3   22.20   22.10
  -3  11   3   17.30   20.30
   1 -11  -3  193.38   37.10
   1  11  -3  204.98   30.20
  -1  11   3  164.38   27.30
  -1  11   3  197.28   28.90
   1  11  -3  150.08   26.90
   1  11  -3  190.28   24.40
   1 -11   3   12.80   22.70
  -1 -11  -3   37.40   32.10
  -1  11  -3   -5.70   18.50
   1  11   3  -12.30   19.30
  -1  11  -3  -18.50   17.40
   1  11   3  -35.50   19.00
  -1  11  -3  -12.20   19.30
   3 -11   3  -11.10   22.50
  -3 -11  -3   28.50   32.00
   3  11   3   12.80   21.50
  -3  11  -3   -1.50   18.60
  -3  11  -3  -18.50   18.70
   3  11   3   22.30   22.20
  -3  11  -3    3.40   18.40
   5 -11   3   86.89   26.10
   5 -11   3   74.99   22.90
  -5 -11  -3   80.89   37.90
   5 -11   3   75.59   25.10
   5 -11   3   68.09   24.10
  -5  11  -3  116.89   23.70
  -5  11  -3   67.59   21.60
   5  11   3   34.40   24.90
   5  11   3   68.59   25.40
  -5  11  -3   50.59   22.40
   7 -11   3  416.76   37.20
  -7 -11  -3  283.77   48.10
   7 -11   3  375.16   36.30
   7 -11   3  277.47   34.10
  -7  11  -3  412.46   37.30
   7  11   3  275.47   35.70
  -7  11  -3  256.67   31.10
   7  11   3  245.18   32.60
  -7  11  -3  322.57   37.00
  -9 -11  -3  153.18   47.90
   9 -11   3  150.68   26.40
   9 -11   3  146.49   25.20
   9 -11   3  113.59   27.50
  -9  11  -3  111.59   26.20
   9  11   3  102.29   28.80
  -9  11  -3  139.29   26.60
  -9  11  -3  109.39   25.50
   9  11   3  102.29   28.30
  11 -11   3  391.36   40.90
  11 -11   3  247.28   30.50
  11 -11   3  382.06   43.90
 -11 -11  -3  258.47   55.59
  11  11   3  285.27   37.70
 -11  11  -3  239.98   31.00
  11  11   3  237.18   34.10
 -11  11  -3  262.97   32.60
 -11  11  -3  210.68   31.50
  13 -11   3   21.20   26.60
 -13 -11  -3   62.89   52.09
  13 -11   3   49.80   26.50
  13  11   3   30.10   27.20
  13  11   3   35.00   27.10
 -13  11  -3   40.70   28.50
 -13  11  -3   54.89   27.40
  15 -11   3  -28.70   25.40
 -15 -11  -3  -51.09   50.89
  15 -11   3   14.90   27.00
 -15  11  -3  -34.00   26.10
  15  11   3  -16.10   25.60
 -15  11  -3    1.70   27.70
  15  11   3  -10.50   26.50
  16 -12  -3  125.49   42.40
  16 -12  -3  104.19   29.70
 -16 -12   3   10.90   52.39
  16  12  -3  127.09   33.10
 -16  12   3  112.99   37.00
  16  12  -3   93.29   29.90
  14 -12  -3  115.59   42.10
 -14 -12   3    1.90   48.00
  14 -12  -3   67.59   26.10
  14  12  -3   71.49   28.00
 -14  12   3  101.39   37.80
  14  12  -3   73.29   30.30
 -14  12   3   81.59   42.90
 -12 -12   3   12.40   44.10
  12 -12  -3  127.39   38.40
  12 -12  -3   49.40   29.70
  12  12  -3  116.39   29.20
 -12  12   3   52.89   25.10
 -12  12   3   51.59   33.90
  12  12  -3   75.59   29.90
  10 -12  -3   56.79   28.10
  10 -12  -3   75.39   34.70
 -10 -12   3   40.80   48.60
 -10  12   3   10.50   22.00
  10  12  -3   46.80   24.60
 -10  12   3   46.90   32.90
  10  12  -3   30.40   27.10
   8 -12  -3   40.20   26.20
   8 -12  -3   82.99   33.30
   8 -12  -3   36.70   23.80
  -8  12   3   43.30   33.50
   8  12  -3   60.69   25.40
   8  12  -3   43.40   26.80
  -8  12   3   38.80   22.80
  -8  12   3   48.70   24.70
   6 -12  -3   66.89   28.60
   6 -12  -3   12.30   23.80
  -6 -12   3   29.70   22.60
   6 -12  -3   32.30   26.60
   6  12  -3   43.50   24.40
  -6  12   3   51.99   23.60
   6  12  -3   42.20   23.70
  -6  12   3   14.40   34.60
  -6  12   3  -11.30   23.60
  -4 -12   3   39.80   23.00
   4 -12  -3  107.49   32.00
   4 -12  -3   25.70   25.40
  -4  12   3   45.00   23.90
   4  12  -3   76.29   23.70
  -4  12   3   48.40   22.60
   4  12  -3   49.90   25.50
  -2 -12   3   10.60   22.30
   2 -12  -3   25.20   29.00
   2 -12  -3   -0.40   23.70
   2  12  -3   21.10   20.70
  -2  12   3    2.40   20.40
  -2  12   3    5.60   21.80
   2  12  -3   13.30   22.80
   0 -12  -3   42.80   31.20
   0 -12   3  -15.60   22.60
   0  12   3   -1.10   22.20
   0  12  -3    4.60   19.80
   0  12   3   49.60   23.40
   0  12  -3   19.50   21.60
   0  12  -3   13.70   22.60
   2 -12   3   29.10   26.00
  -2 -12  -3   30.50   34.10
   2  12   3   65.69   24.60
   2  12   3    8.00   24.20
  -2  12  -3   43.20   23.20
  -2  12  -3   37.60   21.90
  -2  12  -3   30.00   20.80
   4 -12   3   11.50   26.30
   4 -12   3   31.80   26.40
  -4 -12  -3  118.89   39.70
   4  12   3   41.40   25.50
  -4  12  -3   49.30   22.80
  -4  12  -3   48.30   23.10
  -4  12  -3   50.19   23.70
   4  12   3   63.49   25.70
   6 -12   3   85.59   28.90
   6 -12   3   61.19   24.70
  -6 -12  -3   98.19   40.30
   6  12   3   90.79   26.50
   6  12   3   59.09   28.70
  -6  12  -3   58.39   24.30
  -6  12  -3   49.70   25.10
  -8 -12  -3  130.59   46.10
   8 -12   3  101.49   30.20
   8 -12   3   90.19   27.40
   8  12   3  115.99   30.30
   8  12   3  112.89   32.30
  -8  12  -3   49.20   26.00
  -8  12  -3  131.59   27.30
  10 -12   3  139.69   30.20
  10 -12   3  136.39   29.40
  10 -12   3  105.09   29.10
 -10 -12  -3  128.79   50.49
 -10  12  -3  118.39   28.60
 -10  12  -3  109.49   32.70
 -10  12  -3  120.29   30.60
  10  12   3  143.39   32.50
  10  12   3   59.89   31.80
  12 -12   3  102.79   29.80
 -12 -12  -3   84.89   50.79
  12 -12   3   75.49   29.90
  12  12   3  105.39   31.50
  12  12   3   68.39   32.60
 -12  12  -3   76.39   30.70
 -12  12  -3   83.69   30.30
  13 -13  -3   59.49   38.40
 -13  13   3   10.40   39.40
  13  13  -3   38.50   26.00
  13  13  -3  -20.00   26.50
  11 -13  -3   57.99   30.30
  11 -13  -3   88.79   39.00
 -11  13   3   12.20   24.50
  11  13  -3   49.99   30.70
 -11  13   3   52.59   39.40
  11  13  -3   65.29   27.60
   9 -13  -3   47.50   35.60
   9 -13  -3   28.20   28.50
   9  13  -3   49.99   28.20
  -9  13   3   40.00   39.50
  -9  13   3    9.60   24.50
   9  13  -3   56.99   28.90
   7 -13  -3   84.89   34.40
   7 -13  -3   51.79   29.70
   7 -13  -3   53.69   26.60
  -7 -13   3   92.99   27.70
   7  13  -3   60.29   27.70
  -7  13   3   47.50   28.20
   7  13  -3   35.10   26.80
  -7  13   3   61.49   27.90
  -7  13   3    2.80   39.80
  -5 -13   3   78.29   28.20
   5 -13  -3   38.10   25.80
   5 -13  -3    3.90   27.70
   5 -13  -3   88.09   34.30
   5  13  -3   32.00   26.00
  -5  13   3   -0.60   25.30
   5  13  -3   53.39   27.20
  -5  13   3   -9.60   22.60
   3 -13  -3  120.09   34.90
   3 -13  -3   44.50   30.40
  -3 -13   3   95.89   28.10
   3  13  -3   75.49   26.70
  -3  13   3   52.99   27.20
  -3  13   3   52.39   26.80
   3  13  -3   63.99   26.60
  -1 -13   3   28.10   26.70
   1 -13  -3   51.39   32.70
   1 -13  -3    6.00   27.70
  -1  13   3   10.40   24.90
   1  13  -3   14.60   24.50
  -1  13   3   14.20   24.60
   1  13  -3    6.90   21.70
  -1 -13  -3  109.89   38.00
   1 -13   3  125.59   31.40
  -1  13  -3   69.19   27.60
   1  13   3   55.49   27.90
   1  13   3   57.49   28.30
  -1  13  -3   84.29   25.90
  -3 -13  -3   89.39   39.40
   3 -13   3   15.00   28.40
   3 -13   3    2.50   30.20
  -3  13  -3   48.00   24.60
  -3  13  -3   28.90   26.00
   3  13   3    6.00   26.00
   3  13   3   29.80   27.00
   5 -13   3   28.50   29.70
   5 -13   3    0.70   28.10
  -5 -13  -3  101.89   41.20
  -5  13  -3   90.19   29.30
   5  13   3   32.70   29.40
   5  13   3   56.89   28.20
  -7 -13  -3   37.00   43.80
   7 -13   3   -1.20   28.10
   7 -13   3   18.90   25.70
  -7  13  -3    7.70   29.30
  -7  13  -3   13.60   25.80
   7  13   3  -18.00   28.20
   7  13   3   11.20   27.30
   9 -13   3    3.70   26.60
   9 -13   3   60.89   29.20
  -9 -13  -3   35.30   47.10
   9  13   3  -17.40   26.00
  -9  13  -3   -8.30   27.70
   9  13   3  -38.60   28.70
  -9  13  -3   15.30   27.70
   8 -14  -3   60.59   37.10
  -8 -14   3   56.19   28.10
   8 -14  -3   13.00   30.20
  -8  14   3  -25.70   50.29
  -8  14   3   26.20   28.10
   8  14  -3   29.80   28.20
   8  14  -3   61.29   29.40
  -6 -14   3  130.19   32.60
   6 -14  -3  138.49   32.70
   6 -14  -3  162.18   38.70
   6 -14  -3   99.19   34.80
  -6  14   3   92.39   31.60
  -6  14   3   77.49   30.00
   6  14  -3  125.99   33.40
   6  14  -3  155.18   36.00
   4 -14  -3  165.08   37.00
  -4 -14   3  181.68   35.50
   4 -14  -3  199.28   34.40
   4  14  -3  195.98   36.10
   4  14  -3  145.19   32.40
  -4  14   3  157.28   34.80
  -4  14   3  178.38   35.00
   2 -14  -3   56.59   32.90
  -2 -14   3   44.90   30.90
   2 -14  -3  172.48   39.90
   2  14  -3  100.69   30.70
   2  14  -3   62.59   28.30
  -2  14   3  109.49   31.10
  -2  14   3  103.79   32.00
   0 -14  -3  129.59   40.10
   0 -14  -3   60.69   32.20
   0 -14   3   66.59   32.30
   0  14   3   39.20   28.60
   0  14  -3   49.80   27.20
   0  14  -3   39.20   30.10
   0  14   3   89.79   31.40
  -2 -14  -3   95.59   39.20
   2 -14   3  -10.70   30.90
   2 -14   3  -35.90   28.50
  -2  14  -3   14.30   26.60
   2  14   3  -16.40   26.40
  -2  14  -3    9.70   28.00
   2  14   3   40.60   29.20
   4 -14   3  -14.30   29.40
  -4 -14  -3   71.29   39.70
   4  14   3    6.90   28.80
   4  14   3  -15.70   27.20
  -4  14  -3    4.50   27.60
  28   0  -4    9.70   25.40
 -28   0   4  -53.59   29.20
 -28   0   4  -51.69   35.30
  28   0  -4   11.20   25.60
  26   0  -4   50.09   24.10
 -26   0   4  -32.00   27.40
 -26   0   4   11.70   34.70
  26   0  -4   38.40   23.40
  24   0  -4  573.14   43.60
 -24   0   4  506.05   47.50
  24   0  -4  487.45   43.50
  24   0  -4  535.75   39.90
 -24   0   4  464.45   54.19
  22   0  -4  163.58   29.50
  22   0  -4  159.38   22.90
  22   0  -4  160.88   24.70
 -22   0   4  168.78   34.50
 -22   0   4  144.29   28.00
  20   0  -4  964.70   43.30
 -20   0   4  893.21   53.09
  20   0  -4  907.41   46.80
  20   0  -4  891.61   39.10
 -20   0   4  896.41   46.10
 -18   0   4  413.06   32.60
  18   0  -4  439.66   30.50
  18   0  -4  436.16   27.60
 -18   0   4  402.06   37.10
  18   0  -4  461.65   35.80
  16   0  -4   60.39   18.00
 -16   0   4   48.00   18.60
  16   0  -4   37.90   12.80
  16   0  -4   45.20   12.30
 -16   0   4   35.00   14.30
  14   0  -4  131.79   14.40
 -14   0   4  173.88   18.10
  14   0  -4  152.38   19.40
  14   0  -4  160.48   19.80
 -14   0   4  160.28   22.10
  12   0  -4  186.78   16.40
 -12   0   4  203.28   22.20
  12   0  -4  221.08   21.60
  12   0  -4  209.18   18.30
 -12   0   4  212.28   20.40
  10   0  -4 3684.53   68.49
 -10   0   4 3885.51   77.49
  10   0  -4 3737.03   65.09
  10   0  -4 3990.50   72.29
   8   0  -4 1399.16   34.60
  -8   0   4 1345.87   36.80
   8   0  -4 1283.67   29.30
   8   0  -4 1312.47   32.30
   6   0  -4 5675.63   88.79
   6   0  -4 5876.41   90.39
   6   0  -4 5636.54   85.09
  -6   0   4 5836.92   93.39
   4   0  -4 2442.76   43.60
   4   0  -4 2475.15   40.70
   4   0  -4 2412.96   43.90
  -4   0   4 2371.26   37.90
  -4   0   4 2509.45   45.10
   2   0  -4  138.49   12.50
  -2   0   4  150.58    9.10
   2   0  -4  159.78    9.30
   2   0  -4  153.68    9.80
   0   0  -4 5488.05   84.49
   0   0  -4 5502.05   78.79
   0   0   4 5558.04   82.79
   0   0  -4 5573.24   79.39
   2   0   4 2729.33   48.10
  -2   0  -4 2613.94   43.40
  -2   0  -4 2725.93   49.70
  -4   0  -4 6498.65  101.39
  -4   0  -4 6279.57   94.09
  -4   0  -4 6395.76  103.49
   4   0   4 6486.55   99.29
   4   0   4 6428.36   94.69
   6   0   4 6099.99   96.59
  -6   0  -4 6106.99  103.99
   6   0   4 6011.70   92.19
  -6   0  -4 5950.50   92.09
  -6   0  -4 5935.31   98.69
  -8   0  -4   24.90   14.90
  -8   0  -4    0.50    9.20
   8   0   4   10.60    7.60
  -8   0  -4    9.60    7.50
   8   0   4  -14.40    9.20
 -10   0  -4   23.20   17.60
  10   0   4   38.00    9.90
 -10   0  -4   35.80    9.70
 -10   0  -4   43.50   12.20
  10   0   4   18.10   11.40
 -12   0  -4  986.70   39.00
  12   0   4  976.30   32.80
  12   0   4  982.60   34.50
 -12   0  -4  984.20   46.80
 -12   0  -4  919.81   32.20
 -14   0  -4 1294.57   57.69
 -14   0  -4 1229.98   45.90
  14   0   4 1218.48   41.00
  14   0   4 1248.28   39.60
 -16   0  -4  398.86   34.30
 -16   0  -4  359.26   45.20
  16   0   4  367.96   28.40
  16   0   4  433.16   30.10
  18   0   4   44.20   18.00
 -18   0  -4   46.30   32.80
  18   0   4   47.10   20.80
 -18   0  -4   53.29   21.50
  18   0   4   86.59   20.50
 -20   0  -4  -17.00   32.50
 -20   0  -4  -26.50   20.10
  20   0   4    8.00   21.40
  20   0   4   25.50   20.00
 -22   0  -4  -46.80   35.80
  22   0   4  -29.30   23.70
 -22   0  -4   -9.90   22.30
  22   0   4   14.60   20.80
  24   0   4   58.19   24.90
 -24   0  -4   20.90   28.00
 -24   0  -4  -14.10   41.10
  27  -1  -4   47.20   28.10
 -27  -1   4   32.70   38.10
  27  -1  -4   56.19   26.30
 -27   1   4   67.89   40.00
  27   1  -4  101.19   27.00
 -27   1   4   39.30   32.30
  25  -1  -4   22.80   21.00
 -25  -1   4    5.90   32.10
  25  -1  -4   34.10   24.70
 -25  -1   4    3.90   25.80
  25   1  -4   46.90   22.70
  25   1  -4    3.20   22.10
  25   1  -4   50.89   26.30
 -25   1   4    2.20   27.50
 -25   1   4    6.20   33.20
 -23  -1   4  195.98   29.20
  23  -1  -4  179.28   31.20
 -23  -1   4  179.98   38.70
  23  -1  -4  227.98   30.40
  23  -1  -4  226.98   26.40
 -23   1   4  149.79   37.10
  23   1  -4  199.88   30.30
 -23   1   4  177.58   31.00
  23   1  -4  193.38   26.10
  23   1  -4  191.18   25.60
  21  -1  -4  180.58   30.80
  21  -1  -4  177.18   24.90
 -21  -1   4  176.58   25.60
  21  -1  -4  171.38   22.70
 -21  -1   4  171.58   34.10
  21   1  -4  162.98   22.10
 -21   1   4  165.08   33.20
  21   1  -4  152.98   21.70
 -21   1   4  174.78   28.30
  21   1  -4  189.08   28.70
 -19  -1   4  139.79   22.20
  19  -1  -4  128.49   18.30
  19  -1  -4  136.39   20.80
  19  -1  -4  127.49   25.40
 -19  -1   4  120.79   28.70
  19   1  -4  114.79   18.70
 -19   1   4  113.49   26.70
  19   1  -4  107.19   23.30
 -19   1   4  123.39   23.00
  19   1  -4  128.69   18.60
  17  -1  -4   14.60   17.70
 -17  -1   4   -1.70   17.10
 -17  -1   4   12.10   13.60
  17  -1  -4   14.80   11.50
  17  -1  -4   15.30   12.80
  17   1  -4    9.70   11.60
  17   1  -4   16.50   12.20
  17   1  -4   29.40   18.50
 -17   1   4   11.00   17.10
 -17   1   4    3.30   14.80
 -15  -1   4   38.00   13.30
  15  -1  -4   12.90   11.60
  15  -1  -4   11.60   10.10
 -15  -1   4   24.70   16.60
  15  -1  -4   13.10   15.20
 -15   1   4  -14.20   12.40
  15   1  -4   23.10   16.00
  15   1  -4   27.80   11.10
 -15   1   4   29.10   16.10
  15   1  -4   13.50   11.10
  13  -1  -4   40.00   12.30
 -13  -1   4   40.50   15.60
  13  -1  -4   43.70   14.50
  13  -1  -4   38.30   10.40
  13   1  -4   48.90   15.30
  13   1  -4   26.60   10.10
 -13   1   4   36.00   12.90
 -13   1   4   46.50   15.80
  13   1  -4   34.10   10.40
 -11  -1   4  333.97   24.70
  11  -1  -4  316.37   17.40
  11  -1  -4  309.27   21.00
  11  -1  -4  338.07   22.10
  11   1  -4  358.76   23.40
 -11   1   4  326.97   24.30
 -11   1   4  333.67   22.50
  11   1  -4  316.67   19.00
  11   1  -4  316.57   18.10
  -9  -1   4  305.17   20.30
   9  -1  -4  276.07   18.10
   9  -1  -4  298.77   14.90
   9  -1  -4  274.17   17.50
   9   1  -4  301.87   16.20
  -9   1   4  288.87   20.80
   9   1  -4  301.27   15.40
   9   1  -4  327.17   19.90
  -7  -1   4  872.61   27.50
   7  -1  -4  852.61   25.60
   7  -1  -4  872.01   25.90
   7  -1  -4  862.91   21.50
   7   1  -4  832.02   22.60
  -7   1   4  908.01   29.60
   7   1  -4  833.02   23.30
   7   1  -4  889.71   27.20
  -5  -1   4 3215.58   49.99
   5  -1  -4 3118.49   55.29
   5  -1  -4 3145.79   49.90
   5  -1  -4 3243.78   55.79
   5   1  -4 3210.38   52.89
   5   1  -4 3252.57   49.60
   5   1  -4 3144.29   53.89
  -5   1   4 3196.78   59.49
   5   1  -4 3222.38   56.09
   3  -1  -4  240.38   14.50
  -3  -1   4  241.68   10.60
   3  -1  -4  266.07   12.70
   3  -1  -4  211.68   13.30
   3   1  -4  254.07   12.50
   3   1  -4  226.68   14.00
   3   1  -4  261.87   10.70
  -3   1   4  235.28   14.20
  -3   1   4  266.57   10.50
   3   1  -4  267.87   13.50
   1  -1  -4  624.14   21.90
  -1  -1   4  624.54   17.70
   1  -1  -4  624.54   17.50
   1  -1  -4  626.04   19.60
   1   1  -4  690.63   16.70
  -1   1   4  639.64   21.80
   1   1  -4  646.44   17.30
   1   1  -4  638.54   20.40
  -1   1   4  650.03   17.60
  -1   1   4  632.64   16.60
  -1  -1  -4 1405.86   35.60
  -1  -1  -4 1428.06   30.60
  -1  -1  -4 1380.16   27.70
   1  -1   4 1413.96   30.10
   1   1   4 1410.56   30.10
   1   1   4 1440.76   27.50
  -1   1  -4 1446.46   32.80
  -1   1  -4 1378.56   28.00
  -3  -1  -4 1114.89   27.50
   3  -1   4 1083.89   27.60
  -3  -1  -4 1096.59   34.20
   3   1   4 1123.19   27.80
  -3   1  -4 1079.29   25.30
  -3   1  -4 1128.19   30.30
   3   1   4 1096.89   23.60
   5  -1   4 1336.17   30.30
  -5  -1  -4 1277.17   40.00
   5  -1   4 1337.57   32.50
  -5  -1  -4 1225.88   26.60
  -5  -1  -4 1287.27   32.30
  -5   1  -4 1294.77   35.30
  -5   1  -4 1261.17   29.40
   5   1   4 1253.77   26.60
  -5   1  -4 1326.17   34.60
   5   1   4 1252.87   31.90
  -7  -1  -4  226.48   13.90
  -7  -1  -4  249.78   27.70
   7  -1   4  213.08   15.60
  -7  -1  -4  229.98   17.70
   7  -1   4  232.68   18.00
  -7   1  -4  228.28   20.10
   7   1   4  176.98   13.60
  -7   1  -4  249.08   16.00
  -7   1  -4  206.98   21.50
   7   1   4  197.88   17.50
  -9  -1  -4   99.09   20.90
   9  -1   4   52.59   10.30
  -9  -1  -4   60.99   11.90
   9  -1   4   59.59   12.30
  -9  -1  -4   69.09   10.20
   9   1   4   48.20   12.50
   9   1   4   54.59   10.10
  -9   1  -4   57.09   16.30
  -9   1  -4   53.39   10.40
  -9   1  -4   46.60   12.60
 -11  -1  -4  131.99   24.90
  11  -1   4  125.79   15.90
 -11  -1  -4  134.49   16.50
  11  -1   4  123.99   14.50
 -11   1  -4  134.79   23.00
  11   1   4  115.79   14.00
 -11   1  -4  112.09   14.10
  11   1   4  126.29   16.90
 -11   1  -4  122.69   17.70
  13  -1   4  356.46   24.50
 -13  -1  -4  358.46   27.70
 -13  -1  -4  340.37   39.20
  13  -1   4  315.77   24.90
 -13   1  -4  306.57   24.60
  13   1   4  351.46   25.60
 -13   1  -4  331.17   35.10
  13   1   4  318.87   23.80
 -13   1  -4  324.57   29.80
  15  -1   4  208.38   22.10
 -15  -1  -4  202.08   23.20
 -15  -1  -4  275.47   37.30
  15  -1   4  217.98   22.30
 -15   1  -4  228.68   32.80
  15   1   4  179.08   21.20
  15   1   4  217.08   20.60
 -15   1  -4  264.17   32.10
 -15   1  -4  209.48   23.40
 -17  -1  -4   19.40   17.50
  17  -1   4   49.80   18.50
 -17  -1  -4   13.50   30.50
  17  -1   4   36.10   17.10
  17   1   4    1.30   16.30
 -17   1  -4   18.30   27.50
  17   1   4   24.60   17.80
 -17   1  -4   39.00   19.70
  17   1   4   29.60   16.10
 -19  -1  -4    7.70   18.60
 -19  -1  -4    3.70   33.10
  19  -1   4   25.40   20.00
  19  -1   4   27.80   22.70
  19   1   4   44.80   17.90
  19   1   4    2.00   17.60
 -19   1  -4   28.90   22.50
 -19   1  -4   35.40   31.60
  21  -1   4   23.70   22.00
 -21  -1  -4  -47.80   35.10
  21  -1   4  -12.10   22.20
 -21  -1  -4   19.40   20.60
  21   1   4   39.60   19.90
  21   1   4   20.50   24.90
 -21   1  -4   -6.90   22.20
 -21   1  -4  -33.60   33.40
  23  -1   4    9.60   22.60
  23  -1   4  -19.00   25.30
 -23  -1  -4  -78.69   37.30
 -23   1  -4  -29.80   38.10
  23   1   4   41.30   22.70
 -23   1  -4   -4.00   24.80
  28  -2  -4   54.19   29.70
 -28  -2   4    6.80   41.20
  28  -2  -4   92.39   29.10
 -28   2   4   23.60   39.90
 -28   2   4   63.09   35.20
  28   2  -4   97.09   27.00
 -26  -2   4   23.90   38.60
  26  -2  -4   42.30   23.50
  26  -2  -4    9.60   25.70
  26   2  -4   -1.20   23.20
 -26   2   4   31.80   29.90
 -26   2   4  -28.70   35.00
  26   2  -4   59.19   26.40
 -24  -2   4   57.79   36.80
  24  -2  -4   75.39   22.80
  24  -2  -4   68.19   26.20
  24   2  -4  136.69   28.10
  24   2  -4  104.19   29.10
 -24   2   4   65.49   34.60
 -24   2   4   82.69   28.00
  24   2  -4  112.19   25.20
  22  -2  -4   46.40   22.90
 -22  -2   4   65.89   32.60
  22  -2  -4   64.69   28.00
  22  -2  -4   78.59   20.90
 -22   2   4   57.49   24.80
 -22   2   4   49.10   28.50
  22   2  -4   96.49   21.90
  22   2  -4   72.29   19.00
  22   2  -4  112.49   26.50
  20  -2  -4  220.18   23.50
 -20  -2   4  279.17   41.90
  20  -2  -4  343.77   34.80
  20  -2  -4  240.18   30.60
  20   2  -4  307.57   34.60
  20   2  -4  291.97   30.10
 -20   2   4  272.67   38.60
 -20   2   4  236.38   28.90
  20   2  -4  298.87   28.30
  18  -2  -4  121.19   19.60
  18  -2  -4  112.19   17.80
  18  -2  -4  107.39   23.00
 -18  -2   4  128.89   28.40
  18   2  -4  147.39   23.50
  18   2  -4  130.19   18.10
 -18   2   4  118.29   24.70
  18   2  -4  122.39   17.10
 -18   2   4  110.59   21.50
  16  -2  -4   13.10   16.30
 -16  -2   4   36.60   19.10
  16  -2  -4   13.70   11.70
  16  -2  -4   20.00   12.70
  16   2  -4   40.40   12.60
 -16   2   4    9.30   14.70
  16   2  -4   39.20   11.80
  16   2  -4   47.70   17.70
  14  -2  -4  206.18   23.80
 -14  -2   4  299.67   30.90
  14  -2  -4  226.58   20.90
  14  -2  -4  173.18   20.80
  14   2  -4  283.77   21.10
 -14   2   4  234.98   27.20
  14   2  -4  270.17   20.90
  14   2  -4  271.07   27.20
 -14   2   4  217.78   26.60
 -12  -2   4   76.29   16.80
  12  -2  -4   38.70   14.50
  12  -2  -4   59.09   10.60
  12  -2  -4   44.50   12.00
 -12   2   4   47.40   14.10
 -12   2   4   57.29   16.30
  12   2  -4   54.99   15.30
  12   2  -4   66.29   11.00
  12   2  -4   56.89   10.80
  12   2  -4   35.60    9.30
 -10  -2   4  439.06   26.30
  10  -2  -4  404.76   18.10
  10  -2  -4  412.26   22.70
  10  -2  -4  400.46   22.30
  10   2  -4  413.36   19.60
  10   2  -4  401.76   18.30
 -10   2   4  395.06   25.80
  10   2  -4  420.36   24.30
 -10   2   4  408.86   24.70
  -8  -2   4  524.85   23.90
   8  -2  -4  495.95   17.40
   8  -2  -4  520.55   21.50
   8  -2  -4  524.85   22.20
  -8   2   4  539.35   25.80
   8   2  -4  486.75   17.10
   8   2  -4  505.05   17.90
   8   2  -4  527.85   19.60
  -8   2   4  515.35   23.90
   8   2  -4  536.75   23.80
   6  -2  -4 2376.56   47.50
   6  -2  -4 2408.76   40.70
   6  -2  -4 2405.76   47.30
  -6  -2   4 2394.56   43.70
   6   2  -4 2487.55   49.20
   6   2  -4 2368.26   42.60
  -6   2   4 2422.86   53.19
   6   2  -4 2342.37   43.30
   6   2  -4 2471.55   45.00
   4  -2  -4 3416.66   58.69
   4  -2  -4 3442.46   59.89
   4  -2  -4 3449.46   64.79
  -4  -2   4 3539.35   57.59
  -4   2   4 3479.55   52.89
   4   2  -4 3437.66   56.09
  -4   2   4 3365.36   64.89
   4   2  -4 3403.86   57.09
   4   2  -4 3564.44   60.39
   4   2  -4 3403.66   56.89
  -4   2   4 3413.16   58.69
   2  -2  -4  439.26   16.70
   2  -2  -4  406.26   20.40
   2  -2  -4  410.76   16.40
  -2  -2   4  441.46   15.90
   2   2  -4  448.16   17.70
   2   2  -4  421.86   16.70
  -2   2   4  435.96   14.40
  -2   2   4  444.16   20.50
   2   2  -4  428.06   15.80
  -2   2   4  436.46   15.80
   2   2  -4  451.15   15.50
   0  -2  -4    5.40    6.60
   0  -2  -4    5.00    6.50
   0  -2  -4    1.90    9.00
   0  -2   4    5.70    5.80
   0   2  -4   11.70    7.00
   0   2   4   12.10    5.60
   0   2  -4   11.70    5.60
   0   2  -4   11.40    5.70
   0   2   4    2.80    4.80
  -2  -2  -4  459.65   25.60
  -2  -2  -4  500.35   17.80
   2  -2   4  476.95   18.50
  -2   2  -4  514.45   21.10
   2   2   4  511.85   17.70
   2   2   4  503.05   18.40
  -2   2  -4  477.45   17.40
  -4  -2  -4  612.24   30.90
   4  -2   4  629.34   22.20
  -4  -2  -4  641.14   20.70
  -4   2  -4  613.84   24.70
  -4   2  -4  607.04   20.90
   4   2   4  613.44   21.90
   4   2   4  631.84   20.60
   6  -2   4  114.79   12.20
   6  -2   4  138.89   15.40
  -6  -2  -4  128.09   14.10
  -6  -2  -4  133.99   21.50
   6   2   4  102.29   12.30
  -6   2  -4  120.59   14.50
  -6   2  -4  144.89   14.50
   6   2   4  155.68   13.70
   8  -2   4   59.99   12.50
  -8  -2  -4   62.99   11.10
   8  -2   4   57.79   10.80
  -8  -2  -4   95.59   22.10
  -8   2  -4   62.19   10.80
   8   2   4   57.09   10.50
  -8   2  -4   42.90   12.80
  -8   2  -4   70.19   14.10
   8   2   4   61.19    9.40
   8   2   4   79.39   12.40
  10  -2   4   65.19   12.20
 -10  -2  -4   44.80   22.00
 -10  -2  -4   35.90   11.00
  10  -2   4   67.19   13.80
 -10   2  -4   54.69   11.70
 -10   2  -4   49.70   15.70
  10   2   4   54.69   11.40
  10   2   4   51.29   12.40
 -10   2  -4   62.59   15.10
  10   2   4   49.50   10.00
 -12  -2  -4    4.50   11.20
 -12  -2  -4   24.60   24.10
  12  -2   4   28.30   11.90
  12  -2   4   -6.40   12.70
  12   2   4   10.40   10.40
  12   2   4   -4.40   11.90
 -12   2  -4  -14.00   15.90
  12   2   4   -8.00   10.40
 -12   2  -4   13.60   14.60
 -12   2  -4   20.00   11.90
 -14  -2  -4   80.49   29.20
 -14  -2  -4   90.79   17.00
  14  -2   4   69.99   15.60
  14  -2   4   49.90   16.10
 -14   2  -4   53.89   18.30
 -14   2  -4   59.99   14.80
  14   2   4   98.89   16.40
  14   2   4   87.59   15.10
 -14   2  -4   81.69   23.50
  14   2   4   79.69   16.90
 -16  -2  -4  356.66   30.80
 -16  -2  -4  337.37   50.09
  16  -2   4  343.97   29.00
  16  -2   4  344.47   31.50
  16   2   4  392.56   27.20
 -16   2  -4  298.37   31.80
 -16   2  -4  341.47   36.30
 -16   2  -4  368.66   41.40
  16   2   4  334.27   28.60
 -18  -2  -4   54.29   36.60
  18  -2   4   54.79   19.60
  18  -2   4   75.39   24.50
 -18  -2  -4   96.99   19.70
  18  -2   4   54.69   21.70
  18   2   4   71.99   20.10
 -18   2  -4   82.79   24.30
  18   2   4  118.99   19.90
  18   2   4   84.09   20.70
 -18   2  -4   94.79   32.20
  20  -2   4   18.10   23.40
 -20  -2  -4    4.40   38.80
  20  -2   4    5.90   22.00
  20   2   4    2.80   19.30
 -20   2  -4   22.80   33.00
  20   2   4   52.69   19.60
 -20   2  -4   49.60   24.00
 -22  -2  -4  -76.89   38.80
  22  -2   4   23.80   23.20
  22  -2   4   11.90   26.00
 -22   2  -4  -17.60   34.80
 -22   2  -4    0.30   23.60
  22   2   4   32.20   20.90
  24  -2   4   67.99   30.60
  24  -2   4   51.69   25.60
 -24  -2  -4  -59.99   43.30
 -24   2  -4   16.90   41.90
 -24   2  -4   64.29   28.80
  24   2   4   76.59   23.50
  27  -3  -4   21.30   27.50
 -27  -3   4  -38.70   38.20
  27  -3  -4   18.00   24.80
 -27   3   4  -11.00   30.90
 -27   3   4  -14.60   35.30
  27   3  -4    8.00   24.10
  27   3  -4   12.50   33.50
  25  -3  -4   59.99   25.10
  25  -3  -4  159.08   31.60
 -25  -3   4   79.99   40.60
 -25   3   4   96.09   32.40
  25   3  -4  150.08   27.10
  25   3  -4  176.08   31.50
 -25   3   4  125.09   40.10
  23  -3  -4  214.78   27.90
 -23  -3   4  232.48   43.80
  23  -3  -4  221.28   32.60
 -23   3   4  169.78   32.60
  23   3  -4  315.27   38.40
  23   3  -4  183.78   26.30
 -23   3   4  212.08   40.30
  21  -3  -4  306.47   33.70
 -21  -3   4  446.56   49.99
  21  -3  -4  309.77   35.60
  21  -3  -4  406.36   34.50
  21   3  -4  383.56   39.20
 -21   3   4  363.86   42.70
  21   3  -4  441.66   40.00
  21   3  -4  383.86   33.80
 -21   3   4  403.06   44.90
 -19  -3   4  715.83   51.49
  19  -3  -4  707.73   43.30
  19  -3  -4  680.03   43.40
  19  -3  -4  728.53   35.60
  19   3  -4  710.23   33.70
  19   3  -4  711.23   42.00
  19   3  -4  800.42   36.10
 -19   3   4  672.73   46.50
 -19   3   4  656.43   44.10
  17  -3  -4  293.57   25.40
  17  -3  -4  289.47   30.50
 -17  -3   4  290.17   37.30
  17  -3  -4  285.07   30.20
  17   3  -4  232.38   21.30
  17   3  -4  297.57   30.10
 -17   3   4  210.58   25.10
  17   3  -4  289.17   23.30
  17   3  -4  318.07   24.60
  15  -3  -4   49.80   13.60
  15  -3  -4   59.59   15.40
  15  -3  -4   71.39   16.50
 -15  -3   4   62.79   22.10
  15   3  -4   50.69   12.00
  15   3  -4   73.09   12.90
  15   3  -4   66.09   11.60
  15   3  -4   49.70   16.60
 -15   3   4   61.99   17.90
 -15   3   4   64.19   17.80
  13  -3  -4  647.54   30.20
  13  -3  -4  576.34   30.90
 -13  -3   4  558.04   36.80
  13  -3  -4  555.74   25.90
  13   3  -4  594.44   22.90
  13   3  -4  538.35   30.70
 -13   3   4  598.34   34.70
  13   3  -4  575.34   25.70
  13   3  -4  590.44   24.30
 -13   3   4  632.94   33.80
 -11  -3   4 1858.91   53.79
  11  -3  -4 1882.31   41.70
  11  -3  -4 1931.21   47.80
  11  -3  -4 1862.81   49.30
  11   3  -4 1818.22   42.20
  11   3  -4 1805.92   39.40
  11   3  -4 1762.52   41.80
  11   3  -4 1839.32   49.70
 -11   3   4 1913.41   55.39
 -11   3   4 1828.22   51.09
   9  -3  -4 1666.83   43.60
  -9  -3   4 1624.24   45.70
   9  -3  -4 1647.94   41.90
   9  -3  -4 1653.33   35.50
   9   3  -4 1686.03   44.20
  -9   3   4 1679.43   45.40
   9   3  -4 1585.14   34.50
   9   3  -4 1645.24   38.30
  -9   3   4 1664.33   48.70
   9   3  -4 1693.63   38.50
  -7  -3   4 3543.15   67.79
   7  -3  -4 3647.03   67.19
   7  -3  -4 3638.04   67.39
   7  -3  -4 3546.15   58.09
   7   3  -4 3437.66   58.89
  -7   3   4 3529.35   64.69
   7   3  -4 3715.23   69.09
  -7   3   4 3548.24   68.29
  -7   3   4 3724.73   75.49
   7   3  -4 3656.93   62.99
   7   3  -4 3629.24   63.89
   5  -3  -4  372.76   21.70
  -5  -3   4  370.36   17.20
   5  -3  -4  367.16   18.90
   5  -3  -4  342.07   17.20
  -5   3   4  347.07   21.30
   5   3  -4  383.26   17.00
   5   3  -4  371.16   19.20
  -5   3   4  379.66   14.10
  -5   3   4  377.16   17.10
   5   3  -4  380.86   15.60
   5   3  -4  395.86   16.70
   3  -3  -4 1022.40   26.10
   3  -3  -4 1087.89   29.70
   3  -3  -4 1058.19   34.00
  -3  -3   4 1073.39   28.10
   3   3  -4 1076.29   28.60
  -3   3   4 1022.00   33.60
   3   3  -4 1068.89   26.90
   3   3  -4 1065.29   26.90
   3   3  -4 1056.89   26.20
  -3   3   4 1031.80   24.80
  -3   3   4 1054.19   28.60
   1  -3  -4 1278.17   31.90
   1  -3  -4 1218.48   37.30
   1  -3  -4 1207.18   27.30
  -1  -3   4 1232.78   30.60
  -1   3   4 1207.88   28.40
  -1   3   4 1222.98   37.50
   1   3  -4 1204.98   29.30
   1   3  -4 1198.88   28.70
   1   3  -4 1235.28   30.30
   1   3  -4 1246.98   28.60
  -1   3   4 1260.97   31.20
   1  -3   4 1977.90   41.30
  -1  -3  -4 1919.41   49.70
   1   3   4 1931.01   40.00
   1   3   4 1981.90   42.00
  -1   3  -4 1938.51   42.70
  -1   3  -4 1915.91   39.30
  -1   3  -4 1962.40   40.20
  -3  -3  -4 1476.25   47.10
   3  -3   4 1564.54   36.60
   3   3   4 1522.55   35.90
  -3   3  -4 1507.35   34.80
   3   3   4 1585.94   37.50
  -3   3  -4 1507.15   39.20
  -5  -3  -4 1949.41   58.39
   5  -3   4 2076.39   45.10
   5   3   4 2014.40   44.70
  -5   3  -4 2013.90   49.10
  -5   3  -4 1974.80   43.30
   5   3   4 2027.00   45.40
   7  -3   4  612.04   25.70
  -7  -3  -4  609.64   40.20
   7  -3   4  666.23   26.80
   7   3   4  639.64   25.70
  -7   3  -4  632.54   30.50
  -7   3  -4  593.84   24.80
   7   3   4  626.04   26.20
   9  -3   4  136.99   17.00
   9  -3   4  122.49   14.80
  -9  -3  -4  119.99   27.30
  -9   3  -4  126.39   18.00
   9   3   4  143.59   16.30
   9   3   4  115.29   15.40
  -9   3  -4  117.49   14.40
 -11  -3  -4  339.67   41.20
  11  -3   4  318.47   25.20
 -11  -3  -4  269.67   22.10
  11  -3   4  306.17   23.60
 -11   3  -4  303.97   29.50
  11   3   4  318.97   24.00
 -11   3  -4  273.67   22.90
  11   3   4  307.67   23.80
 -11   3  -4  312.77   26.70
  13  -3   4  516.55   30.40
 -13  -3  -4  530.15   28.50
 -13  -3  -4  498.65   48.30
  13  -3   4  535.55   31.40
 -13   3  -4  446.66   35.60
  13   3   4  517.25   29.60
 -13   3  -4  518.65   35.20
  13   3   4  518.55   25.40
 -13   3  -4  511.85   30.30
  13   3   4  516.05   29.70
  15  -3   4 1060.89   41.50
  15  -3   4 1023.30   42.30
 -15  -3  -4  956.70   62.79
 -15  -3  -4 1017.50   39.80
  15   3   4 1003.70   40.60
  15   3   4 1047.50   36.40
 -15   3  -4 1039.50   49.90
 -15   3  -4 1006.00   49.80
  15   3   4  938.51   40.70
 -15   3  -4 1056.89   42.00
  17  -3   4  119.19   21.20
 -17  -3  -4  130.39   41.10
  17  -3   4  169.78   24.60
 -17   3  -4  154.18   23.40
 -17   3  -4  162.98   27.80
  17   3   4  128.19   22.50
 -17   3  -4  132.19   31.60
  17   3   4  183.58   21.20
 -19  -3  -4  150.18   46.70
  19  -3   4  163.58   28.00
  19  -3   4  186.18   31.40
 -19   3  -4  172.28   37.80
  19   3   4  186.58   22.70
  19   3   4  148.29   25.10
 -19   3  -4  168.38   30.80
  21  -3   4    9.40   25.60
 -21  -3  -4  -62.99   41.30
  21  -3   4  -11.70   23.50
 -21   3  -4   -9.80   23.80
  21   3   4  -23.80   26.10
 -21   3  -4  -46.90   33.40
  21   3   4   22.80   20.00
 -23  -3  -4  -86.59   42.40
  23  -3   4   -0.70   25.50
  23  -3   4   10.40   28.50
 -23   3  -4   -6.80   37.40
 -23   3  -4   31.00   27.60
  26  -4  -4   30.80   27.90
  26  -4  -4    0.30   25.10
 -26  -4   4    1.20   40.60
 -26   4   4   41.60   36.40
 -26   4   4  -12.40   31.70
  26   4  -4   59.09   26.00
  26   4  -4   72.39   26.80
  24  -4  -4  192.08   33.00
 -24  -4   4  109.89   42.60
  24  -4  -4  131.09   27.80
 -24   4   4  170.68   36.10
  24   4  -4  150.48   30.10
  24   4  -4  164.18   27.90
 -24   4   4  170.68   41.30
 -22  -4   4   98.39   36.90
  22  -4  -4   99.09   36.00
  22  -4  -4  147.39   29.50
  22  -4  -4  127.39   24.80
 -22   4   4  122.19   35.50
  22   4  -4  139.49   27.70
  22   4  -4  147.29   24.70
 -22   4   4  113.69   30.70
  20  -4  -4  260.87   32.80
 -20  -4   4  242.68   41.00
  20  -4  -4  274.07   32.70
  20  -4  -4  310.07   32.00
  20   4  -4  313.17   35.80
 -20   4   4  263.37   34.10
  20   4  -4  318.77   32.40
 -20   4   4  285.07   38.90
  18  -4  -4  192.38   22.40
  18  -4  -4  199.38   27.30
  18  -4  -4  163.08   25.40
 -18  -4   4  215.68   36.10
 -18   4   4  247.68   34.80
 -18   4   4  191.98   27.50
  18   4  -4  207.48   23.30
  18   4  -4  212.58   27.00
  18   4  -4  213.68   21.80
 -16  -4   4   63.29   25.40
  16  -4  -4   48.90   17.50
  16  -4  -4   59.99   14.50
  16  -4  -4   53.09   17.80
  16   4  -4   87.79   18.90
 -16   4   4   60.09   18.90
 -16   4   4   60.89   19.80
  16   4  -4   84.19   15.80
  16   4  -4   68.89   14.50
  14  -4  -4   50.29   15.20
  14  -4  -4   24.70   11.90
  14  -4  -4   33.30   14.60
 -14  -4   4   43.60   20.90
  14   4  -4   49.40   12.10
  14   4  -4   41.20   15.30
 -14   4   4   44.40   16.20
  14   4  -4   47.80   12.40
 -14   4   4   36.60   16.00
  12  -4  -4  831.62   32.70
  12  -4  -4  783.42   28.00
 -12  -4   4  752.82   40.30
  12  -4  -4  766.82   34.50
  12   4  -4  781.62   29.10
 -12   4   4  791.72   38.20
 -12   4   4  848.52   37.80
  12   4  -4  753.12   29.10
  12   4  -4  773.82   34.70
  10  -4  -4  194.08   16.30
 -10  -4   4  236.08   26.30
  10  -4  -4  200.38   20.50
  10  -4  -4  216.78   19.80
 -10   4   4  216.68   23.70
  10   4  -4  194.38   18.70
  10   4  -4  200.28   21.80
  10   4  -4  218.78   17.80
 -10   4   4  204.68   24.20
   8  -4  -4  727.33   28.90
   8  -4  -4  722.63   29.50
   8  -4  -4  700.63   21.90
  -8  -4   4  717.63   32.10
   8   4  -4  729.43   30.20
  -8   4   4  733.33   26.60
   8   4  -4  720.53   27.00
  -8   4   4  688.93   31.70
  -8   4   4  784.32   34.60
   8   4  -4  726.53   26.10
   6  -4  -4  499.45   28.10
   6  -4  -4  526.05   24.10
   6  -4  -4  476.35   22.70
  -6   4   4  502.95   22.10
  -6   4   4  496.45   27.90
   6   4  -4  517.85   22.70
  -6   4   4  506.45   19.00
   6   4  -4  498.35   21.50
   6   4  -4  518.45   24.50
   4  -4  -4  479.05   26.40
   4  -4  -4  474.75   23.00
   4  -4  -4  488.85   20.10
  -4  -4   4  510.35   22.10
   4   4  -4  503.55   21.30
   4   4  -4  490.05   22.20
  -4   4   4  473.25   19.00
  -4   4   4  497.85   21.80
   4   4  -4  502.85   18.60
   4   4  -4  495.65   20.30
  -4   4   4  468.45   26.70
  -2  -4   4  111.79   13.00
   2  -4  -4  116.39   14.60
   2  -4  -4  107.09   11.40
   2  -4  -4  100.09   16.20
  -2   4   4  122.09   13.40
  -2   4   4  118.49   16.60
  -2   4   4  120.99   13.00
   2   4  -4  120.99   11.40
   2   4  -4  126.99   13.10
   2   4  -4  114.69   13.30
   2   4  -4  117.29   13.30
   0  -4   4 1206.08   33.10
   0  -4  -4 1147.19   40.20
   0   4  -4 1155.28   32.00
   0   4   4 1167.48   33.10
   0   4  -4 1176.08   31.60
   0   4  -4 1180.38   30.00
   0   4   4 1142.99   30.70
   0   4  -4 1152.98   30.30
   0   4   4 1156.88   40.50
  -2  -4  -4 1491.95   48.60
   2  -4   4 1543.75   38.30
  -2   4  -4 1511.55   39.70
  -2   4  -4 1484.35   36.60
   2   4   4 1573.74   40.10
   2   4   4 1502.65   37.30
  -2   4  -4 1551.54   36.70
   4  -4   4  942.31   30.80
  -4  -4  -4  858.71   42.60
   4   4   4  886.51   29.40
  -4   4  -4  925.61   28.30
   4   4   4  936.31   31.60
  -4   4  -4  922.81   32.90
  -4   4  -4  902.01   28.90
  -6  -4  -4  216.18   29.20
   6  -4   4  192.38   19.50
   6  -4   4  207.98   19.30
  -6   4  -4  241.88   22.90
   6   4   4  225.78   19.00
  -6   4  -4  224.08   18.90
   6   4   4  215.68   18.80
  -8  -4  -4    9.10   21.50
   8  -4   4    4.50   10.50
   8  -4   4   -0.60   11.20
  -8   4  -4    4.60   11.50
  -8   4  -4    5.90    9.50
   8   4   4   -4.20   10.00
   8   4   4   -2.90    9.90
  10  -4   4  -20.50   10.30
 -10  -4  -4   -1.70   24.10
  10  -4   4   -0.70   12.40
 -10   4  -4   -3.10   12.40
 -10   4  -4    1.50   12.90
  10   4   4   -3.30   11.10
  10   4   4  -30.30   10.60
 -10   4  -4  -12.90    9.80
 -12  -4  -4  264.07   38.80
  12  -4   4  257.27   25.30
  12  -4   4  251.57   27.10
  12   4   4  274.07   25.10
 -12   4  -4  256.87   24.90
 -12   4  -4  245.88   27.50
 -12   4  -4  282.67   31.40
  12   4   4  262.37   25.40
  14  -4   4   10.60   16.60
 -14  -4  -4   14.40   33.50
  14   4   4   35.00   13.70
 -14   4  -4   41.80   21.10
  14   4   4   -2.70   15.20
 -14   4  -4   29.60   19.80
 -14   4  -4   35.50   16.70
  14   4   4   22.90   17.00
  16  -4   4  356.56   34.50
  16  -4   4  471.95   35.20
 -16  -4  -4  391.96   58.29
  16   4   4  446.66   29.40
  16   4   4  332.97   32.20
 -16   4  -4  435.76   33.90
  16   4   4  372.16   33.80
 -16   4  -4  391.46   40.60
 -16   4  -4  410.46   40.60
 -18  -4  -4    6.60   41.60
  18  -4   4   75.29   27.20
  18  -4   4   35.40   22.00
  18   4   4   51.69   22.10
 -18   4  -4  111.69   32.10
 -18   4  -4   93.29   28.40
 -18   4  -4  112.39   25.10
  18   4   4  122.49   31.80
  20  -4   4   54.89   27.80
  20  -4   4   24.10   24.60
 -20  -4  -4  -49.30   41.20
  20   4   4   -1.00   22.40
 -20   4  -4   -3.10   31.20
 -20   4  -4   10.40   26.30
  22  -4   4   25.10   28.80
 -22  -4  -4  -89.49   42.20
  22  -4   4    4.60   26.60
 -22   4  -4  -11.00   40.10
 -22   4  -4   12.20   28.90
 -27  -5   4  -45.70   41.60
  27  -5  -4   43.60   29.50
  27  -5  -4   79.99   33.80
 -27   5   4   66.09   40.80
  27   5  -4   70.99   29.30
 -27   5   4   66.79   38.30
  27   5  -4   62.99   27.00
 -25  -5   4   -4.10   40.90
  25  -5  -4   76.59   30.80
  25  -5  -4   71.49   28.50
  25   5  -4   76.69   28.60
 -25   5   4   36.70   35.50
 -25   5   4   91.29   38.30
  25   5  -4   53.29   25.70
  23  -5  -4   72.59   24.60
  23  -5  -4   62.19   28.10
 -23  -5   4   17.90   38.10
  23   5  -4   75.79   27.00
 -23   5   4   35.40   32.70
  23   5  -4   55.49   23.90
 -23   5   4   23.90   31.40
  21  -5  -4   33.40   23.30
  21  -5  -4   49.10   22.00
  21  -5  -4  -15.20   26.40
 -21  -5   4   17.90   35.40
  21   5  -4   71.59   21.80
 -21   5   4   25.00   27.70
  21   5  -4   82.39   26.50
 -21   5   4   29.20   29.30
 -19  -5   4   -8.30   29.10
  19  -5  -4   -9.20   21.60
  19  -5  -4    0.40   18.50
  19  -5  -4   -5.20   16.70
 -19   5   4  -42.70   22.40
  19   5  -4    6.40   15.20
  19   5  -4  -11.80   17.20
  19   5  -4   20.80   21.40
 -19   5   4   27.30   21.90
  17  -5  -4  -13.40   14.40
  17  -5  -4    5.70   18.40
 -17  -5   4  -30.50   26.10
  17  -5  -4  -11.40   15.30
 -17   5   4    8.10   18.00
  17   5  -4  -17.20   17.10
  17   5  -4   -1.50   14.30
  17   5  -4   12.80   13.60
 -17   5   4   -1.80   19.80
  15  -5  -4    1.50   11.90
 -15  -5   4  -25.70   22.60
  15  -5  -4    2.40   14.50
  15  -5  -4  -24.50   14.90
  15   5  -4   14.70   13.00
  15   5  -4   -3.00   14.30
 -15   5   4    2.70   16.30
 -15   5   4  -10.50   16.10
  15   5  -4   -1.40   12.30
  13  -5  -4   40.40   12.70
 -13  -5   4   51.09   22.30
  13  -5  -4   44.90   15.80
  13  -5  -4   42.70   15.40
  13   5  -4   54.39   15.90
 -13   5   4   39.00   16.60
 -13   5   4   52.99   18.00
  13   5  -4   59.19   13.90
  13   5  -4   59.59   14.20
  11  -5  -4   28.40   10.00
  11  -5  -4   32.90   12.90
 -11  -5   4   51.29   20.10
  11  -5  -4   43.50   13.60
 -11   5   4   43.30   14.90
 -11   5   4   37.80   16.00
  11   5  -4   19.70   11.10
  11   5  -4   26.80   11.30
  11   5  -4   38.10   12.90
   9  -5  -4   47.50   12.60
   9  -5  -4   36.60   12.70
  -9  -5   4   62.69   18.60
   9  -5  -4   41.30    9.00
   9   5  -4   45.40   12.50
   9   5  -4   38.30   11.40
  -9   5   4   46.30   10.50
   9   5  -4   40.50   11.90
  -9   5   4   37.60   16.60
  -9   5   4   43.00   14.30
   7  -5  -4  222.88   20.80
   7  -5  -4  212.98   20.50
   7  -5  -4  212.58   25.50
  -7  -5   4  242.38   26.80
  -7   5   4  205.18   18.10
  -7   5   4  227.18   24.90
  -7   5   4  202.18   16.60
  -7   5   4  157.98   16.30
  -7   5   4  216.58   20.40
   7   5  -4  242.68   21.60
   7   5  -4  231.58   19.50
   7   5  -4  225.88   19.20
  -5  -5   4  102.79   15.00
   5  -5  -4  105.99   15.60
   5  -5  -4   84.19   12.30
   5  -5  -4  102.79   18.10
  -5   5   4   97.89   13.70
  -5   5   4  113.09   19.00
   5   5  -4   94.79   12.30
   5   5  -4   94.99   14.10
  -5   5   4  109.49   13.00
   5   5  -4   86.49   14.10
   3  -5  -4  208.68   19.90
   3  -5  -4  172.78   16.10
   3  -5  -4  216.18   23.90
  -3  -5   4  188.68   19.60
  -3   5   4  214.98   17.60
  -3   5   4  218.68   24.30
   3   5  -4  221.68   17.20
   3   5  -4  198.88   15.50
   3   5  -4  186.88   18.70
   3   5  -4  202.78   19.40
  -3   5   4  214.08   18.10
   1  -5  -4  802.62   36.60
   1  -5  -4  838.62   32.60
  -1  -5   4  756.82   30.30
   1   5  -4  797.72   26.70
   1   5  -4  746.03   28.90
  -1   5   4  818.22   28.20
   1   5  -4  817.82   27.70
  -1   5   4  832.52   29.90
  -1   5   4  860.31   38.20
   1   5  -4  826.92   28.70
  -1  -5  -4  201.78   25.70
   1  -5   4  141.19   16.50
  -1   5  -4  152.08   16.30
   1   5   4  194.28   18.60
  -1   5  -4  202.38   17.40
   1   5   4  152.08   17.50
  -1   5  -4  214.38   19.20
  -1   5  -4  151.48   15.40
   3  -5   4  484.35   24.90
  -3  -5  -4  512.25   36.40
   3   5   4  505.25   26.30
  -3   5  -4  507.65   23.20
   3   5   4  498.15   24.30
  -3   5  -4  466.65   22.80
  -3   5  -4  502.85   26.70
  -3   5  -4  494.95   20.00
   5  -5   4   79.69   14.60
  -5  -5  -4   98.09   23.50
  -5   5  -4   82.09   12.30
   5   5   4   92.19   14.10
  -5   5  -4   75.49   14.00
  -5   5  -4  111.79   13.70
   5   5   4  104.29   14.10
   7  -5   4   73.29   14.50
  -7  -5  -4   97.49   25.90
   7  -5   4   87.69   15.50
   7   5   4   87.49   14.40
   7   5   4  104.79   15.60
  -7   5  -4   79.59   13.70
  -7   5  -4   96.99   16.70
   9  -5   4   28.10   12.80
   9  -5   4   33.00   13.90
  -9  -5  -4   39.90   27.50
  -9   5  -4   23.40   14.30
   9   5   4   37.90   13.90
   9   5   4   30.00   13.10
  -9   5  -4   20.60   12.00
 -11  -5  -4   24.10   30.50
  11  -5   4   34.10   15.90
  11  -5   4   33.20   13.70
  11   5   4   45.20   16.00
 -11   5  -4   32.30   16.50
  11   5   4   28.80   14.40
 -11   5  -4   39.00   13.70
  13  -5   4   63.79   19.10
 -13  -5  -4   47.50   35.20
  13  -5   4   69.49   17.10
 -13   5  -4   91.79   17.40
 -13   5  -4  106.79   22.70
  13   5   4   92.69   19.20
 -13   5  -4   64.59   21.30
  13   5   4  110.09   21.00
 -15  -5  -4    8.90   38.70
  15  -5   4   54.19   19.50
 -15   5  -4   34.90   18.40
 -15   5  -4   43.00   21.70
  15   5   4   36.00   20.20
 -15   5  -4   63.69   24.10
  15   5   4   48.80   19.30
 -17  -5  -4    7.80   41.60
  17  -5   4   75.29   23.00
  17  -5   4   50.69   24.20
 -17   5  -4   71.79   26.00
 -17   5  -4   46.50   26.90
  17   5   4    3.80   20.40
 -17   5  -4   21.10   20.80
  19  -5   4   39.00   26.00
 -19  -5  -4  -19.10   43.20
  19  -5   4   49.80   27.70
 -19   5  -4   73.69   29.80
  19   5   4   34.40   22.60
 -19   5  -4   25.50   25.60
 -19   5  -4   81.59   43.00
 -21  -5  -4  -64.79   44.70
  21  -5   4   18.60   26.60
  21  -5   4   -2.20   27.20
  21   5   4   -9.90   22.20
 -21   5  -4   45.30   30.90
  26  -6  -4   29.00   26.30
  26  -6  -4   47.80   31.20
 -26  -6   4  -57.19   42.10
 -26   6   4   25.40   35.60
 -26   6   4   62.99   38.10
  26   6  -4   52.99   29.50
  26   6  -4   31.20   25.20
 -24  -6   4  -28.10   40.50
  24  -6  -4   45.60   28.50
  24  -6  -4   56.09   26.40
  24   6  -4   83.99   24.60
  24   6  -4  106.69   30.20
 -24   6   4   67.79   34.00
 -24   6   4  100.59   36.50
  22  -6  -4  159.68   28.40
 -22  -6   4  165.28   46.50
  22  -6  -4  129.99   31.10
 -22   6   4  198.68   37.80
  22   6  -4  221.88   33.10
  22   6  -4  214.88   27.60
 -22   6   4  175.68   36.70
  20  -6  -4  175.58   26.30
 -20  -6   4  158.88   42.60
  20  -6  -4  108.19   28.10
  20  -6  -4  107.49   27.40
 -20   6   4  131.29   34.10
  20   6  -4  136.89   23.80
 -20   6   4  162.48   33.70
  20   6  -4  145.49   25.90
  20   6  -4  202.28   30.50
 -18  -6   4  247.08   42.90
  18  -6  -4  218.78   24.30
  18  -6  -4  216.78   28.80
  18  -6  -4  174.18   27.90
 -18   6   4  223.78   34.20
  18   6  -4  222.58   26.10
  18   6  -4  280.37   35.30
  18   6  -4  228.08   25.00
 -18   6   4  269.57   33.40
 -16  -6   4   42.80   31.70
  16  -6  -4   41.10   16.10
  16  -6  -4    8.70   17.20
  16  -6  -4   23.50   18.20
 -16   6   4   15.90   21.00
  16   6  -4   16.50   16.70
  16   6  -4   22.10   18.60
 -16   6   4   27.90   21.40
  16   6  -4   19.50   16.10
  14  -6  -4   14.80   15.80
 -14  -6   4  -13.10   24.60
  14  -6  -4   -8.90   15.50
  14  -6  -4   -5.80   12.20
  14   6  -4   -2.20   13.50
 -14   6   4    0.60   17.40
  14   6  -4    8.40   15.20
  14   6  -4   -8.40   13.80
 -14   6   4    2.10   17.40
 -12  -6   4  339.17   38.90
  12  -6  -4  324.47   23.20
  12  -6  -4  331.47   30.10
  12  -6  -4  306.37   27.50
  12   6  -4  319.17   26.10
 -12   6   4  312.27   33.20
 -12   6   4  347.97   32.90
  12   6  -4  342.47   28.20
  12   6  -4  321.07   25.60
 -12   6   4  308.07   23.90
  10  -6  -4  861.21   38.20
 -10  -6   4  898.91   46.20
  10  -6  -4  925.81   29.80
  10  -6  -4  859.11   28.90
  10  -6  -4  854.71   37.20
 -10   6   4  892.21   31.40
 -10   6   4  912.31   41.40
 -10   6   4  882.51   34.20
  10   6  -4  833.62   37.60
  10   6  -4  837.12   35.10
  10   6  -4  834.72   33.10
 -10   6   4  897.91   28.40
 -10   6   4  859.81   44.00
   8  -6  -4 1530.55   35.80
   8  -6  -4 1553.24   46.20
   8  -6  -4 1499.35   54.09
  -8  -6   4 1453.65   51.59
   8  -6  -4 1501.15   45.90
  -8   6   4 1534.75   54.89
   8   6  -4 1520.15   40.90
  -8   6   4 1512.25   38.90
  -8   6   4 1555.64   44.30
   8   6  -4 1382.06   46.10
   8   6  -4 1447.76   44.50
  -8   6   4 1518.65   36.90
  -8   6   4 1436.56   47.00
   6  -6  -4 1199.98   38.10
   6  -6  -4 1248.18   41.30
   6  -6  -4 1168.98   46.10
  -6   6   4 1236.08   40.40
  -6   6   4 1216.58   47.40
  -6   6   4 1184.98   35.60
   6   6  -4 1144.99   39.60
   6   6  -4 1150.08   40.80
  -6   6   4 1244.38   39.80
   6   6  -4 1172.18   34.90
   4  -6  -4  134.99   20.80
   4  -6  -4  159.08   17.90
  -4  -6   4  118.09   17.40
   4  -6  -4   88.79   12.80
  -4   6   4  145.89   16.10
   4   6  -4  137.19   17.50
  -4   6   4  140.89   17.00
   4   6  -4  140.89   14.00
   4   6  -4  136.39   17.20
  -4   6   4  129.69   20.90
   2  -6  -4  424.76   26.30
   2  -6  -4  413.26   31.40
  -2  -6   4  397.26   26.30
   2   6  -4  423.36   21.50
   2   6  -4  400.26   21.70
  -2   6   4  457.65   32.70
  -2   6   4  444.96   24.00
   2   6  -4  416.06   24.50
   2   6  -4  384.06   25.00
  -2   6   4  412.46   24.10
   0  -6   4  297.67   24.10
   0  -6  -4  338.57   31.50
   0   6  -4  333.97   23.30
   0   6   4  360.66   23.40
   0   6  -4  318.37   22.40
   0   6  -4  324.77   21.20
   0   6   4  331.87   23.00
   0   6  -4  347.37   21.70
   2  -6   4 2001.70   52.99
  -2  -6  -4 2031.80   63.99
  -2   6  -4 2094.29   51.59
   2   6   4 2061.49   51.29
  -2   6  -4 2105.49   47.50
  -2   6  -4 2059.79   48.50
  -2   6  -4 2055.99   51.39
   2   6   4 2028.80   54.59
   4  -6   4  548.55   29.10
  -4  -6  -4  618.84   43.00
  -4   6  -4  587.94   23.70
  -4   6  -4  558.04   26.80
   4   6   4  595.64   28.80
   4   6   4  602.54   31.00
  -4   6  -4  599.94   27.90
  -4   6  -4  609.94   31.50
  -6  -6  -4  562.74   44.80
   6  -6   4  571.54   29.80
   6   6   4  560.64   31.10
  -6   6  -4  582.44   28.40
   6   6   4  587.04   29.80
  -6   6  -4  512.45   27.40
  -6   6  -4  547.35   32.90
   8  -6   4  240.88   24.40
  -8  -6  -4  209.08   35.10
   8  -6   4  219.38   24.40
   8   6   4  220.88   24.20
  -8   6  -4  242.98   29.10
  -8   6  -4  218.08   22.70
   8   6   4  209.58   24.70
  10  -6   4   41.60   16.30
 -10  -6  -4   46.30   30.70
  10  -6   4   26.60   14.30
  10   6   4   37.50   16.90
  10   6   4   30.00   16.00
 -10   6  -4   51.99   14.70
 -10   6  -4   32.50   18.40
 -12  -6  -4  193.38   42.40
  12  -6   4  182.78   23.30
  12  -6   4  157.88   21.90
 -12   6  -4  155.78   21.60
  12   6   4  173.98   23.90
  12   6   4  177.18   24.10
 -12   6  -4  154.18   26.00
  14  -6   4  133.39   23.00
  14  -6   4  185.48   24.70
 -14  -6  -4  175.18   46.30
 -14   6  -4  133.99   29.80
  14   6   4  166.28   25.60
  14   6   4  175.78   25.50
 -14   6  -4  179.88   28.40
 -14   6  -4  174.18   24.00
  16  -6   4   97.69   24.20
 -16  -6  -4  115.99   49.99
  16  -6   4  127.39   29.10
 -16   6  -4  138.59   30.00
  16   6   4  127.59   25.70
 -16   6  -4  119.39   25.40
  16   6   4  149.39   26.80
 -18  -6  -4   50.19   50.69
  18  -6   4  128.49   28.10
  18  -6   4  129.29   31.70
 -18   6  -4  109.19   27.60
  18   6   4  118.19   26.90
 -18   6  -4   90.09   31.60
  20  -6   4   16.80   25.70
 -20  -6  -4  -45.20   48.10
  20  -6   4   65.89   30.30
 -20   6  -4   22.50   27.60
  20   6   4   33.20   24.50
 -20   6  -4   15.70   30.00
  22  -6   4   -5.10   30.80
  22  -6   4   15.90   27.60
 -22  -6  -4  -97.39   46.80
 -22   6  -4   14.90   32.40
  22   6   4   33.20   27.80
 -25  -7   4  -53.69   45.60
  25  -7  -4   26.70   25.60
  25  -7  -4   43.30   29.10
 -25   7   4   53.89   34.50
  25   7  -4   17.40   24.50
 -25   7   4   21.50   34.20
  25   7  -4   20.50   27.60
  23  -7  -4   46.20   24.80
  23  -7  -4   52.99   28.10
 -23  -7   4  -46.30   40.30
 -23   7   4   62.69   32.40
 -23   7   4   33.00   32.50
  23   7  -4   68.59   29.10
  23   7  -4   36.90   23.00
  21  -7  -4  106.89   29.50
 -21  -7   4   48.80   41.60
  21  -7  -4   80.79   25.30
 -21   7   4  101.49   33.00
 -21   7   4  128.29   35.40
  21   7  -4  149.49   31.00
  21   7  -4   92.49   23.80
  19  -7  -4   63.89   25.90
  19  -7  -4   77.09   22.50
  19  -7  -4   45.00   26.10
 -19  -7   4   49.60   40.20
  19   7  -4   87.49   22.70
  19   7  -4   55.19   25.90
 -19   7   4   99.39   31.40
  19   7  -4   51.89   22.30
 -19   7   4   61.69   30.20
  17  -7  -4   95.29   27.00
  17  -7  -4  113.79   25.60
  17  -7  -4  122.79   22.00
 -17  -7   4   88.99   37.10
 -17   7   4  100.39   28.80
  17   7  -4  125.09   26.40
  17   7  -4  109.29   23.10
 -17   7   4  100.79   30.60
  17   7  -4   68.09   22.30
  15  -7  -4   25.90   20.50
  15  -7  -4   23.40   20.10
 -15  -7   4   51.69   32.80
  15  -7  -4   41.80   16.50
 -15   7   4   14.30   23.60
 -15   7   4    7.70   22.70
  15   7  -4    3.60   17.70
  15   7  -4   41.80   19.60
  15   7  -4    1.00   18.50
 -13  -7   4  120.49   32.30
  13  -7  -4  145.89   22.60
  13  -7  -4  127.09   17.90
  13  -7  -4   94.89   21.90
 -13   7   4  124.69   26.70
  13   7  -4  138.09   20.90
  13   7  -4  139.79   19.10
 -13   7   4  132.39   19.60
 -13   7   4  137.09   25.30
  13   7  -4  102.19   20.40
  11  -7  -4  407.86   32.50
  11  -7  -4  337.87   24.50
 -11  -7   4  379.56   43.50
  11  -7  -4  397.26   30.60
  11  -7  -4  387.46   24.50
  11   7  -4  385.46   27.60
 -11   7   4  420.26   35.90
 -11   7   4  385.56   27.20
 -11   7   4  407.96   36.10
  11   7  -4  350.86   31.10
  11   7  -4  389.86   28.60
 -11   7   4  360.56   23.30
 -11   7   4  352.16   25.90
   9  -7  -4  967.20   40.10
   9  -7  -4  959.80   47.70
  -9  -7   4  896.51   49.10
   9  -7  -4  943.31   31.00
   9  -7  -4  887.31   39.10
   9   7  -4  924.21   35.10
   9   7  -4  929.01   41.80
  -9   7   4  909.71   43.10
  -9   7   4  991.60   38.30
  -9   7   4  921.91   31.40
  -9   7   4  915.41   33.50
  -9   7   4  978.00   48.10
   9   7  -4  960.70   38.80
   7  -7  -4  697.43   33.30
   7  -7  -4  639.94   33.10
   7  -7  -4  649.43   38.90
  -7  -7   4  595.34   39.80
   7   7  -4  610.04   32.00
   7   7  -4  659.03   29.20
  -7   7   4  640.44   34.80
  -7   7   4  714.73   40.70
  -7   7   4  660.23   29.90
   7   7  -4  633.84   34.40
  -7   7   4  676.73   32.10
   5  -7  -4  378.86   24.80
   5  -7  -4  403.26   32.10
   5  -7  -4  421.86   27.50
  -5  -7   4  386.26   27.30
  -5   7   4  434.76   25.90
   5   7  -4  387.86   27.30
  -5   7   4  426.96   25.80
  -5   7   4  411.26   33.10
   5   7  -4  394.06   27.10
   5   7  -4  432.86   24.00
   3  -7  -4   34.30   10.10
  -3  -7   4   26.50   12.90
   3  -7  -4   33.20   14.00
   3  -7  -4   36.30   17.70
  -3   7   4   32.60   17.50
   3   7  -4   49.80   13.60
   3   7  -4   34.70   12.80
  -3   7   4   39.00   11.90
   3   7  -4   37.80   11.00
  -3   7   4   62.19   14.20
   1  -7  -4   67.69   20.40
  -1  -7   4   68.29   15.30
   1   7  -4   83.99   14.30
  -1   7   4  112.99   16.50
   1   7  -4   78.49   13.80
   1   7  -4   71.19   14.50
  -1   7   4   71.39   14.10
  -1   7   4   95.39   22.40
   1   7  -4   79.89   13.40
   1  -7   4 1084.89   41.60
  -1  -7  -4 1083.79   49.60
   1   7   4 1158.48   40.30
  -1   7  -4 1161.68   36.90
  -1   7  -4 1179.88   37.80
   1   7   4 1107.89   41.90
  -1   7  -4 1089.69   39.20
  -1   7  -4 1191.38   38.70
   3  -7   4  609.44   32.70
  -3  -7  -4  614.64   44.00
  -3   7  -4  570.84   29.80
  -3   7  -4  569.54   31.90
   3   7   4  621.24   31.40
  -3   7  -4  615.84   27.40
   3   7   4  576.74   33.10
  -3   7  -4  617.94   29.50
  -5  -7  -4  413.46   43.70
   5  -7   4  415.66   28.80
  -5   7  -4  446.06   32.00
  -5   7  -4  450.75   26.90
  -5   7  -4  434.06   28.00
  -5   7  -4  427.66   23.10
   5   7   4  419.36   30.20
   5   7   4  404.06   28.80
  -7  -7  -4  119.19   31.80
   7  -7   4  114.69   18.70
   7  -7   4  141.69   20.40
   7  -7   4  138.79   17.00
  -7   7  -4   95.59   18.80
  -7   7  -4  125.99   22.20
  -7   7  -4  125.99   18.80
   7   7   4  128.59   21.20
   7   7   4  118.69   20.30
   9  -7   4   76.29   19.20
  -9  -7  -4   24.00   33.50
   9  -7   4   52.69   17.60
  -9   7  -4   73.19   21.80
   9   7   4   18.80   17.20
  -9   7  -4   61.59   17.50
   9   7   4   58.59   19.50
  11  -7   4   66.29   21.60
 -11  -7  -4   43.90   37.80
  11  -7   4   51.19   20.00
 -11   7  -4   57.09   19.90
 -11   7  -4   60.19   23.70
  11   7   4   46.00   20.60
  11   7   4   91.49   22.30
  13  -7   4   38.40   21.20
  13  -7   4   58.29   20.70
 -13  -7  -4   56.99   42.90
 -13   7  -4   23.80   20.60
  13   7   4   27.20   19.90
  13   7   4   27.90   22.20
 -13   7  -4   36.60   23.80
 -15  -7  -4  113.69   48.40
  15  -7   4   89.19   27.60
  15  -7   4   97.19   24.80
  15  -7   4  121.89   25.40
 -15   7  -4  109.79   29.00
  15   7   4   98.39   26.20
  15   7   4  130.79   25.90
 -15   7  -4  120.59   25.20
 -17  -7  -4   -4.80   48.30
  17  -7   4   70.69   24.70
  17  -7   4   67.49   28.00
 -17   7  -4   76.99   26.90
 -17   7  -4   51.29   29.00
  17   7   4   71.29   25.40
  17   7   4   72.39   24.70
  19  -7   4    4.40   25.90
  19  -7   4   17.80   26.00
 -19  -7  -4  -80.09   49.00
 -19   7  -4    7.30   28.10
  19   7   4  -12.60   22.30
 -19   7  -4   29.30   26.00
 -21  -7  -4  141.79   64.29
  21  -7   4  -12.20   27.40
  21  -7   4    9.40   27.20
 -21   7  -4   24.70   30.40
 -21   7  -4  -44.10   26.40
  21   7   4  -52.79   22.70
 -24  -8   4  -64.99   42.90
  24  -8  -4   16.60   24.70
  24  -8  -4   42.20   31.50
 -24   8   4   -7.80   33.50
 -24   8   4   29.90   32.50
  24   8  -4   45.40   29.40
  22  -8  -4   18.10   22.80
 -22  -8   4  -60.29   39.40
  22  -8  -4    9.30   26.10
 -22   8   4  -10.60   29.80
 -22   8   4    4.50   30.80
  22   8  -4  -23.40   22.90
  22   8  -4   20.70   27.90
 -20  -8   4  -14.50   40.00
  20  -8  -4   19.50   25.10
  20  -8  -4   12.30   21.40
  20   8  -4   10.10   26.20
 -20   8   4   46.80   30.90
  20   8  -4   27.00   22.30
 -20   8   4   18.70   30.20
  20   8  -4   20.10   20.40
  18  -8  -4    0.10   19.10
 -18  -8   4  -22.30   37.00
  18  -8  -4   37.40   23.70
  18  -8  -4   28.30   24.30
  18   8  -4   -5.00   23.60
  18   8  -4   20.80   20.90
  18   8  -4   56.09   21.60
 -18   8   4  109.79   32.10
 -18   8   4   51.99   29.90
 -16  -8   4   81.79   38.80
  16  -8  -4   44.60   20.50
  16  -8  -4   66.49   25.50
  16  -8  -4  105.89   25.20
  16   8  -4   92.99   21.60
  16   8  -4   57.49   24.80
  16   8  -4   46.60   21.00
 -16   8   4  118.99   30.60
 -16   8   4   74.89   29.40
  14  -8  -4   27.70   23.30
 -14  -8   4   37.70   35.30
  14  -8  -4   43.70   21.40
  14  -8  -4   58.19   19.00
  14   8  -4   29.80   20.20
 -14   8   4   63.59   25.70
  14   8  -4   57.29   22.80
  14   8  -4   63.39   19.40
 -14   8   4   80.59   27.70
 -14   8   4   47.90   17.70
 -12  -8   4   25.20   33.60
  12  -8  -4   78.29   20.70
  12  -8  -4   58.19   17.10
  12  -8  -4   -1.10   21.60
  12  -8  -4   71.59   28.20
  12   8  -4   74.19   18.60
 -12   8   4   96.09   19.70
 -12   8   4   52.99   23.10
 -12   8   4   88.69   26.70
 -12   8   4  100.19   18.50
  12   8  -4   56.39   20.30
  12   8  -4   67.19   21.30
  10  -8  -4    8.80   20.60
  10  -8  -4   -5.50   15.60
 -10  -8   4  -15.30   27.30
  10  -8  -4    5.50   12.80
  10  -8  -4   13.00   14.20
  10  -8  -4    6.30   16.40
 -10   8   4   10.10   13.10
 -10   8   4    1.40   12.90
 -10   8   4   -5.40   17.00
 -10   8   4    1.90   20.40
  10   8  -4  -10.90   14.90
  10   8  -4    8.60   14.70
  10   8  -4    7.00   14.20
 -10   8   4   10.00   14.10
   8  -8  -4   37.00   20.70
   8  -8  -4   34.20   16.20
   8  -8  -4   50.59   16.00
  -8  -8   4   29.60   25.30
   8   8  -4   42.50   14.90
  -8   8   4   31.80   18.90
   8   8  -4   44.20   15.00
  -8   8   4   47.00   15.20
   8   8  -4    8.00   16.20
  -8   8   4   47.90   21.80
  -8   8   4   47.50   15.40
   6  -8  -4    0.30   11.10
  -6  -8   4  -13.70   20.00
   6  -8  -4    1.30   17.10
   6  -8  -4   -5.30   14.10
  -6   8   4  -16.20   13.20
  -6   8   4  -17.10   11.40
  -6   8   4   -4.00   17.50
   6   8  -4   12.20   12.80
   6   8  -4  -11.90   11.60
   6   8  -4    2.60   13.20
  -6   8   4  -31.30   15.10
   4  -8  -4   36.80   15.90
   4  -8  -4   41.00   11.40
   4  -8  -4   26.70   18.70
  -4  -8   4   47.00   14.40
  -4   8   4   18.60   19.30
  -4   8   4   40.80   13.80
   4   8  -4   36.00   14.50
   4   8  -4   28.00   13.10
  -4   8   4   27.80   15.50
   4   8  -4   48.80   15.00
  -2  -8   4    4.20   13.30
   2  -8  -4   11.90   16.40
   2  -8  -4   32.60   19.20
   2   8  -4  -16.00   11.70
   2   8  -4   -0.30   10.50
   2   8  -4    5.80   11.90
  -2   8   4   17.90   14.60
  -2   8   4   20.20   12.70
  -2   8   4   36.40   20.10
   2   8  -4   38.60   13.90
   0  -8   4   50.99   16.30
   0  -8  -4   62.89   22.30
   0   8  -4   71.59   14.60
   0   8  -4   60.99   14.60
   0   8   4   57.49   17.60
   0   8  -4   55.89   15.50
   0   8   4   49.40   16.40
   0   8  -4   62.99   15.30
  -2  -8  -4   -6.50   21.10
   2  -8   4  -19.90   14.30
  -2   8  -4    0.10   12.90
   2   8   4   -5.20   13.60
   2   8   4  -17.10   13.10
  -2   8  -4  -20.90   12.10
  -2   8  -4   18.10   13.30
  -2   8  -4    8.80   12.00
  -4  -8  -4   17.40   26.50
   4  -8   4    6.70   17.50
   4   8   4   40.90   16.90
  -4   8  -4   34.30   12.60
  -4   8  -4   12.90   16.00
  -4   8  -4   20.70   15.50
  -4   8  -4   36.80   16.50
   4   8   4   11.40   16.20
   6  -8   4  120.49   23.80
   6  -8   4  162.68   20.60
  -6  -8  -4   81.49   34.80
   6   8   4  126.59   23.50
  -6   8  -4  123.99   20.60
  -6   8  -4  200.58   21.70
  -6   8  -4  119.19   21.50
   6   8   4  136.39   22.80
  -6   8  -4  153.68   23.20
   8  -8   4   26.90   21.00
  -8  -8  -4   -7.90   34.50
   8  -8   4   45.30   19.60
  -8   8  -4   66.09   19.30
   8   8   4   44.40   21.00
  -8   8  -4   34.70   21.20
   8   8   4   36.80   19.80
  -8   8  -4   53.69   19.70
  10  -8   4   84.79   23.80
  10  -8   4   97.19   22.50
 -10  -8  -4   75.29   41.90
  10   8   4   55.69   21.90
 -10   8  -4  160.48   24.80
 -10   8  -4   60.79   25.10
  10   8   4   99.19   24.10
  12  -8   4   40.20   20.90
  12  -8   4   87.09   24.00
 -12  -8  -4   31.00   41.80
  12   8   4   36.90   22.40
  12   8   4   61.29   21.80
 -12   8  -4   63.99   22.30
 -12   8  -4   57.49   25.20
  14  -8   4   48.30   23.10
  14  -8   4   30.10   25.70
  14  -8   4   17.70   21.80
 -14  -8  -4  -17.70   44.70
  14   8   4   35.30   21.70
 -14   8  -4   53.89   23.20
  14   8   4   36.10   23.60
 -14   8  -4   -5.90   25.60
  16  -8   4    0.10   24.40
 -16  -8  -4  -25.30   48.90
  16  -8   4   50.89   24.70
 -16   8  -4   50.09   25.30
  16   8   4   23.00   22.80
  16   8   4   31.80   24.80
 -16   8  -4   61.19   29.20
  18  -8   4   -9.20   24.40
  18  -8   4   44.60   26.60
 -18  -8  -4  -66.79   50.19
 -18   8  -4   37.90   25.90
 -18   8  -4   29.00   29.00
  18   8   4   56.99   26.20
  18   8   4   -0.70   23.80
  20  -8   4  -13.60   27.10
 -20  -8  -4 -104.09   49.80
  20  -8   4   -0.80   28.30
 -20   8  -4   19.50   28.40
  20   8   4  -23.70   24.80
 -20   8  -4   18.10   30.40
  21  -9  -4  136.39   32.30
  21  -9  -4  109.39   27.00
 -21  -9   4   21.20   46.00
 -21   9   4  124.99   38.30
  21   9  -4   93.19   31.00
  21   9  -4  110.69   25.60
 -21   9   4  102.49   35.10
  19  -9  -4   39.10   22.30
 -19  -9   4  -26.70   40.70
  19  -9  -4   53.69   26.40
  19   9  -4   38.40   22.10
 -19   9   4   34.10   31.40
  19   9  -4   48.10   26.90
 -19   9   4   65.79   31.70
  19   9  -4    9.10   25.10
  17  -9  -4   60.09   21.60
  17  -9  -4   51.69   24.70
 -17  -9   4   40.20   40.20
  17  -9  -4   84.09   27.40
  17   9  -4   81.39   22.90
 -17   9   4   85.59   30.10
  17   9  -4   78.29   26.50
  17   9  -4   55.89   22.00
 -17   9   4   97.99   31.00
  15  -9  -4   15.70   18.70
 -15  -9   4  -60.39   37.60
  15  -9  -4   45.90   23.40
  15  -9  -4   35.70   22.30
  15  -9  -4   34.60   29.80
  15   9  -4   12.60   18.90
 -15   9   4   49.60   27.10
 -15   9   4   11.40   25.40
  15   9  -4   27.30   19.40
  15   9  -4   17.50   23.40
  13  -9  -4   31.80   21.80
  13  -9  -4    1.50   21.20
  13  -9  -4   23.20   27.80
  13  -9  -4  -18.20   17.00
 -13  -9   4   13.60   37.30
 -13   9   4   -3.50   17.80
 -13   9   4   34.60   19.00
  13   9  -4   12.80   21.80
 -13   9   4   22.90   26.90
  13   9  -4   18.70   19.00
 -13   9   4   18.70   24.20
  13   9  -4   -2.50   19.00
 -11  -9   4   67.59   36.50
  11  -9  -4  132.29   32.60
  11  -9  -4  110.69   19.70
  11  -9  -4   51.59   23.30
  11  -9  -4  135.69   21.70
  11  -9  -4  150.98   25.90
 -11   9   4   94.99   29.70
 -11   9   4  150.18   32.40
 -11   9   4  128.99   21.80
 -11   9   4  150.98   20.20
  11   9  -4  140.99   24.50
  11   9  -4  110.29   25.80
  11   9  -4  113.09   21.40
 -11   9   4  135.59   25.60
   9  -9  -4   32.20   20.30
  -9  -9   4  -12.40   32.50
   9  -9  -4    2.10   19.30
   9  -9  -4    7.80   28.70
  -9   9   4   71.39   17.90
   9   9  -4    9.70   18.90
  -9   9   4   65.39   19.00
  -9   9   4   53.49   21.20
   9   9  -4   -8.60   20.90
   9   9  -4   66.29   20.60
  -9   9   4  -19.30   26.60
   7  -9  -4  787.12   50.09
   7  -9  -4  781.72   39.10
   7  -9  -4  709.13   42.00
  -7   9   4  823.92   51.29
  -7   9   4  736.53   40.40
  -7   9   4  810.32   38.10
   7   9  -4  725.43   42.50
  -7   9   4  727.03   42.20
   7   9  -4  764.12   41.30
   7   9  -4  792.12   36.20
   5  -9  -4   48.30   13.80
  -5  -9   4   48.70   17.60
   5  -9  -4   31.80   23.70
   5  -9  -4   53.59   19.20
   5   9  -4   46.30   17.30
   5   9  -4   44.30   16.30
  -5   9   4   14.80   15.20
  -5   9   4   50.79   24.30
   5   9  -4   46.40   18.00
  -5   9   4   13.50   17.20
  -3  -9   4   -7.80   14.30
   3  -9  -4    6.90   17.00
   3  -9  -4   29.30   22.70
  -3   9   4    2.90   16.90
   3   9  -4  -14.70   13.70
  -3   9   4   -3.30   14.40
   3   9  -4   10.50   15.40
  -3   9   4   10.40   22.10
   3   9  -4   12.40   15.90
   1  -9  -4   67.79   24.30
  -1  -9   4   37.30   18.00
  -1   9   4   37.30   19.50
  -1   9   4   38.50   16.90
   1   9  -4   42.80   17.30
   1   9  -4   54.59   17.10
   1   9  -4   45.10   15.20
   1   9  -4   45.20   16.50
   1  -9   4  279.37   31.50
  -1  -9  -4  214.58   33.30
   1   9   4  206.48   25.80
   1   9   4  156.58   26.30
  -1   9  -4  270.47   27.50
  -1   9  -4  239.28   28.40
  -1   9  -4  219.28   23.10
  -1   9  -4  252.47   28.30
   3  -9   4  440.96   36.40
  -3  -9  -4  409.66   48.80
  -3   9  -4  429.06   33.60
  -3   9  -4  439.86   33.20
  -3   9  -4  445.06   30.20
  -3   9  -4  418.86   32.80
   3   9   4  366.76   34.60
   3   9   4  329.47   34.60
   5  -9   4  204.08   27.50
   5  -9   4  178.88   25.70
  -5  -9  -4  157.98   38.90
  -5   9  -4  120.19   22.10
  -5   9  -4  175.18   24.40
  -5   9  -4  153.78   23.10
  -5   9  -4  220.38   24.10
   5   9   4  184.18   26.40
   5   9   4  181.88   27.00
   7  -9   4  127.59   23.80
   7  -9   4   66.29   24.80
  -7  -9  -4  126.09   40.10
  -7   9  -4  181.58   25.10
  -7   9  -4  178.58   26.20
   7   9   4  131.09   23.70
   7   9   4  161.28   28.00
  -7   9  -4  152.88   23.30
  -9  -9  -4   27.10   40.20
   9  -9   4   24.50   20.90
   9  -9   4    9.10   23.20
  -9   9  -4   46.20   22.80
  -9   9  -4   25.70   19.50
  -9   9  -4   73.19   22.60
   9   9   4   57.69   23.30
   9   9   4   66.29   21.40
  11  -9   4   14.80   19.90
 -11  -9  -4    9.70   40.60
  11  -9   4   15.20   22.80
  11   9   4   11.00   20.70
 -11   9  -4   66.99   25.90
  11   9   4   27.40   22.60
 -11   9  -4   38.40   22.60
 -13  -9  -4  263.57   55.49
  13  -9   4  360.36   39.50
  13  -9   4  240.58   31.60
  13  -9   4  243.38   34.10
  13   9   4  296.67   37.60
 -13   9  -4  274.17   32.10
  13   9   4  331.87   38.00
 -13   9  -4  263.07   35.50
  15  -9   4   26.90   25.20
 -15  -9  -4   40.50   51.29
  15  -9   4   81.09   28.00
  15   9   4   54.59   25.50
  15   9   4   73.49   27.70
 -15   9  -4   35.00   27.60
 -15   9  -4   49.00   25.80
  17  -9   4  110.69   30.60
 -17  -9  -4   68.39   57.59
  17  -9   4  135.59   32.00
  17   9   4  116.69   29.80
 -17   9  -4  118.79   34.30
 -17   9  -4  122.09   30.80
  17   9   4  128.39   32.80
 -20 -10   4  -64.29   43.40
  20 -10  -4  102.29   31.20
  20 -10  -4   53.49   25.00
 -20  10   4   55.59   35.50
  20  10  -4   79.39   25.70
 -20  10   4   81.29   35.70
  20  10  -4   81.09   31.40
  18 -10  -4   61.59   27.20
 -18 -10   4    7.80   43.40
  18 -10  -4   65.09   23.50
  18 -10  -4   -2.30   37.00
 -18  10   4   52.39   32.90
  18  10  -4   55.29   25.00
  18  10  -4   48.10   28.00
 -18  10   4   45.30   31.90
  16 -10  -4   -9.90   32.30
  16 -10  -4   25.80   23.60
 -16 -10   4  -47.30   39.50
  16 -10  -4  -11.70   23.70
  16 -10  -4   23.40   19.80
  16  10  -4   73.99   23.30
 -16  10   4   30.50   29.20
 -16  10   4    0.80   28.70
  16  10  -4   48.40   26.00
  14 -10  -4   13.80   22.50
  14 -10  -4   50.39   29.70
  14 -10  -4   47.00   22.50
 -14 -10   4    2.80   39.70
  14 -10  -4    4.80   18.00
  14  10  -4   -9.70   20.70
 -14  10   4   10.90   28.00
 -14  10   4   13.40   19.00
 -14  10   4   -4.10   25.80
 -14  10   4   25.10   26.00
  14  10  -4   29.30   23.30
  14  10  -4   -3.90   19.00
  12 -10  -4   72.39   24.50
  12 -10  -4   37.90   29.80
  12 -10  -4   56.09   21.40
 -12 -10   4   -3.60   36.00
 -12  10   4   33.70   19.70
  12  10  -4   11.40   19.50
 -12  10   4   23.30   24.20
 -12  10   4   29.50   27.40
  12  10  -4   49.40   23.40
  12  10  -4   40.70   21.10
  10 -10  -4  262.07   32.10
  10 -10  -4  303.67   30.50
 -10 -10   4  243.88   43.60
  10 -10  -4  270.17   41.50
  10 -10  -4  233.48   28.90
 -10  10   4  249.58   31.10
 -10  10   4  228.18   31.40
  10  10  -4  274.77   27.20
 -10  10   4  298.57   45.20
  10  10  -4  233.38   29.80
 -10  10   4  360.76   33.70
  10  10  -4  246.58   33.30
   8 -10  -4    2.70   19.70
   8 -10  -4   90.59   31.50
   8 -10  -4   67.29   24.10
  -8 -10   4   92.89   33.50
  -8  10   4   63.79   24.00
   8  10  -4   63.79   20.10
   8  10  -4   58.19   24.20
   8  10  -4   58.59   23.10
  -8  10   4   91.09   22.70
  -8  10   4  116.19   21.60
  -8  10   4   47.30   30.80
   6 -10  -4  421.16   37.90
  -6 -10   4  397.76   38.70
   6 -10  -4  457.65   47.60
   6  10  -4  402.96   38.60
   6  10  -4  365.06   38.90
  -6  10   4  515.25   35.80
   6  10  -4  509.85   33.90
  -6  10   4  410.46   36.10
  -6  10   4  574.44   51.19
  -4 -10   4   54.09   21.80
   4 -10  -4   58.99   23.80
   4 -10  -4   93.19   29.50
   4  10  -4   79.19   23.60
  -4  10   4   69.39   30.70
  -4  10   4   87.19   22.00
   4  10  -4   48.30   22.50
  -4  10   4   47.90   20.20
   4  10  -4  110.69   20.20
   2 -10  -4   47.30   27.50
  -2 -10   4   10.70   19.00
   2 -10  -4   10.20   24.30
  -2  10   4   10.10   21.00
   2  10  -4   42.00   17.20
  -2  10   4   18.90   18.60
   2  10  -4   33.80   19.70
   2  10  -4   45.70   19.50
   0 -10  -4  116.69   31.50
   0 -10   4  124.49   23.90
   0  10  -4   94.29   21.50
   0  10   4   92.69   22.80
   0  10  -4  123.19   22.40
   0  10   4   66.89   24.30
   0  10  -4   84.99   21.10
   2 -10   4  196.18   29.70
  -2 -10  -4  203.28   39.00
  -2  10  -4  243.28   25.90
  -2  10  -4  257.17   31.10
  -2  10  -4  280.77   31.70
  -2  10  -4  198.18   24.90
   2  10   4  147.79   28.80
   2  10   4  202.58   28.00
   4 -10   4  242.18   31.00
  -4 -10  -4  245.78   42.70
   4  10   4  205.58   28.90
  -4  10  -4  252.87   28.50
  -4  10  -4  252.57   27.30
  -4  10  -4  300.17   33.70
   4  10   4  215.58   28.60
  -4  10  -4  299.97   34.10
  -6 -10  -4  178.78   42.20
   6 -10   4  143.79   27.00
   6 -10   4  160.38   24.90
  -6  10  -4  168.78   25.30
   6  10   4  156.48   27.20
   6  10   4  161.28   28.40
  -6  10  -4  162.68   25.20
  -6  10  -4  241.68   26.60
   8 -10   4    1.30   22.40
  -8 -10  -4   32.80   37.90
   8 -10   4   -9.60   20.00
  -8  10  -4    7.80   20.80
  -8  10  -4   26.00   21.20
   8  10   4   -8.40   21.80
   8  10   4   -1.90   20.90
  -8  10  -4   14.60   20.00
  10 -10   4   -0.80   22.90
 -10 -10  -4   28.00   43.20
  10 -10   4   15.60   22.30
  10 -10   4   45.10   23.10
 -10  10  -4  -43.50   19.90
  10  10   4    7.90   22.00
  10  10   4  -11.30   22.70
 -10  10  -4    4.00   22.10
 -10  10  -4   26.90   22.80
  12 -10   4   65.19   25.60
 -12 -10  -4   38.70   48.00
  12 -10   4   86.79   27.40
  12 -10   4  130.59   29.30
  12  10   4   77.79   28.00
 -12  10  -4   93.19   27.10
  12  10   4   59.39   27.60
 -12  10  -4  117.19   30.10
 -14 -10  -4    1.50   50.99
  14 -10   4  150.48   31.20
  14 -10   4  117.59   29.50
  14  10   4  124.49   30.70
 -14  10  -4  151.08   31.60
  14  10   4  118.69   31.50
 -14  10  -4  167.68   33.80
 -16 -10  -4   -7.00   55.19
  16 -10   4   47.80   29.90
  16 -10   4   57.89   29.50
  16  10   4   61.09   29.60
 -16  10  -4   66.99   30.40
  16  10   4   10.80   25.40
 -16  10  -4   54.79   31.40
  19 -11  -4   32.40   25.90
  19 -11  -4   30.30   37.50
 -19 -11   4  -74.89   44.30
  19  11  -4   27.70   28.70
 -19  11   4   18.50   33.90
  19  11  -4   32.40   25.00
 -19  11   4   -2.90   33.90
  17 -11  -4   70.39   38.80
  17 -11  -4   82.39   26.90
 -17 -11   4  -39.20   45.10
 -17  11   4   37.90   35.00
 -17  11   4   57.79   33.70
  17  11  -4   53.69   25.80
  17  11  -4   61.19   30.00
  15 -11  -4   71.19   38.80
 -15 -11   4  -36.30   43.80
  15 -11  -4   46.90   27.80
  15 -11  -4   90.19   26.20
  15  11  -4   69.39   29.40
 -15  11   4  101.79   34.00
 -15  11   4   19.10   23.30
 -15  11   4   48.20   34.90
  15  11  -4   41.80   24.70
  13 -11  -4   42.50   34.30
  13 -11  -4    2.00   21.00
 -13 -11   4  -63.99   39.50
  13 -11  -4  -16.10   24.40
 -13  11   4    1.90   19.50
  13  11  -4   29.00   23.60
 -13  11   4   41.40   31.60
  13  11  -4   61.09   27.10
 -13  11   4  -36.50   27.30
 -11 -11   4   -7.80   38.30
  11 -11  -4   36.20   21.50
  11 -11  -4   29.40   24.50
  11 -11  -4   53.49   31.50
 -11  11   4  -29.60   30.80
  11  11  -4   82.09   26.90
 -11  11   4   46.40   29.30
  11  11  -4   32.00   22.40
 -11  11   4   27.00   20.70
   9 -11  -4   38.00   19.90
   9 -11  -4    4.40   21.70
   9 -11  -4   33.40   30.10
  -9  11   4    6.30   20.30
  -9  11   4  -10.80   18.70
   9  11  -4   -6.20   20.40
   9  11  -4  -21.10   18.70
   9  11  -4  -12.40   20.70
  -9  11   4   -8.50   28.20
  -7 -11   4  -26.90   19.40
   7 -11  -4   12.90   28.50
   7 -11  -4    5.40   23.60
   7  11  -4   13.40   20.70
   7  11  -4  -14.90   17.50
  -7  11   4   50.69   30.40
  -7  11   4   -2.20   19.30
  -7  11   4   19.00   21.00
   7  11  -4  -17.60   21.20
   5 -11  -4   57.69   25.90
  -5 -11   4   38.20   23.40
   5 -11  -4  124.89   31.60
  -5  11   4   70.19   33.80
   5  11  -4   79.29   24.50
  -5  11   4   85.39   24.70
  -5  11   4   74.69   22.50
   5  11  -4    4.00   22.90
   5  11  -4   77.29   20.70
  -3 -11   4   41.90   23.70
   3 -11  -4   55.79   30.00
   3 -11  -4   -0.40   23.40
  -3  11   4   26.70   20.10
   3  11  -4   -3.40   19.50
   3  11  -4   25.40   18.50
   3  11  -4   19.60   22.10
  -3  11   4   14.20   21.80
  -1 -11   4   23.40   21.50
   1 -11  -4   37.10   28.90
   1 -11  -4  -14.40   25.90
   1  11  -4   30.90   20.00
   1  11  -4    9.20   19.80
   1  11  -4   -7.10   18.50
  -1  11   4   43.70   23.00
  -1  11   4    5.20   20.30
  -1 -11  -4   44.10   31.00
   1 -11   4   -1.10   22.50
  -1  11  -4  -15.40   18.80
  -1  11  -4  -10.30   18.90
   1  11   4    2.50   20.90
   1  11   4    0.40   20.80
  -1  11  -4   -5.50   19.00
  -3 -11  -4   14.20   33.70
   3 -11   4   -0.60   23.30
   3  11   4   11.60   21.80
  -3  11  -4    1.60   18.40
  -3  11  -4   18.50   19.90
   3  11   4   -4.70   20.60
  -3  11  -4    7.50   20.40
   5 -11   4   13.40   21.40
  -5 -11  -4   33.40   36.40
   5 -11   4   14.10   23.00
   5  11   4   12.70   22.90
   5  11   4   24.40   23.70
  -5  11  -4   11.80   21.00
  -5  11  -4   41.10   22.50
  -5  11  -4   39.40   30.10
  -7 -11  -4   51.19   39.50
   7 -11   4   10.70   22.80
   7 -11   4   12.50   25.50
   7 -11   4   19.20   22.40
  -7  11  -4    9.10   21.20
   7  11   4   13.40   24.40
  -7  11  -4    8.10   22.30
   7  11   4   62.09   24.80
  -7  11  -4   28.20   22.20
   9 -11   4   69.09   28.50
   9 -11   4   28.80   23.10
   9 -11   4   49.99   26.30
  -9 -11  -4   47.50   45.30
  -9  11  -4   88.89   27.00
  -9  11  -4   19.40   23.70
   9  11   4   40.20   24.70
  -9  11  -4   21.40   24.80
   9  11   4   18.90   26.40
  11 -11   4   70.59   26.50
 -11 -11  -4   45.90   49.40
  11 -11   4   37.50   29.20
  11 -11   4   50.19   25.60
  11  11   4   52.99   28.10
  11  11   4   24.50   27.90
 -11  11  -4   19.70   27.10
 -11  11  -4   52.79   27.50
 -13 -11  -4   -3.90   50.29
  13 -11   4   47.50   26.80
  13 -11   4   22.50   26.50
 -13  11  -4   44.70   28.60
 -13  11  -4   18.90   28.70
  13  11   4   11.70   26.40
  13  11   4   39.90   28.60
  16 -12  -4   14.20   37.00
  16 -12  -4   47.80   26.50
  16  12  -4   30.80   26.70
 -16  12   4   26.30   35.70
  16  12  -4   51.79   29.70
 -16  12   4  -27.40   33.90
  14 -12  -4   51.99   34.80
  14 -12  -4   76.09   41.10
  14 -12  -4    8.20   28.80
 -14  12   4   36.90   35.40
  14  12  -4   77.69   29.30
 -14  12   4  -14.40   23.00
  14  12  -4   19.20   25.40
  12 -12  -4   73.89   37.10
  12 -12  -4   42.10   30.30
  12  12  -4   38.30   25.40
 -12  12   4    6.70   23.60
 -12  12   4   26.00   35.20
  12  12  -4   34.10   27.40
  10 -12  -4   67.19   36.50
  10 -12  -4   12.30   27.60
 -10  12   4   48.30   35.40
  10  12  -4   59.69   26.80
  10  12  -4   24.70   26.50
 -10  12   4   13.10   22.60
  -8 -12   4  121.89   27.30
   8 -12  -4   85.19   28.40
   8 -12  -4  102.39   26.20
   8 -12  -4  114.29   35.30
   8  12  -4   64.69   26.80
  -8  12   4   59.59   24.80
   8  12  -4   98.79   27.20
  -8  12   4  109.69   37.40
  -8  12   4  101.29   27.30
   6 -12  -4   72.69   30.80
  -6 -12   4   41.80   23.00
   6 -12  -4    7.50   24.40
   6  12  -4   32.10   24.00
  -6  12   4  -16.50   33.40
  -6  12   4   -8.10   23.10
  -6  12   4    5.40   21.00
   6  12  -4   32.90   24.20
   4 -12  -4   35.20   28.70
  -4 -12   4  -12.10   21.90
   4 -12  -4   -1.60   25.20
   4  12  -4   16.60   23.00
   4  12  -4    2.70   29.50
   4  12  -4    6.90   20.10
  -4  12   4   -4.40   20.70
  -4  12   4    9.70   20.30
  -2 -12   4   33.90   26.60
   2 -12  -4   -5.80   24.60
   2 -12  -4   44.70   31.10
   2  12  -4   16.60   20.00
  -2  12   4   10.90   22.40
   2  12  -4    0.80   21.30
   2  12  -4   13.90   20.30
  -2  12   4   32.50   23.00
   0 -12  -4   11.30   29.20
   0 -12  -4   23.50   30.80
   0 -12   4   13.00   25.00
   0  12  -4   41.10   21.50
   0  12   4   12.10   23.40
   0  12   4   55.59   24.30
   0  12  -4   16.30   22.80
   0  12  -4   41.30   22.10
   2 -12   4   64.69   29.60
  -2 -12  -4   45.00   36.50
   2  12   4   18.30   24.90
  -2  12  -4   25.60   23.60
   2  12   4   23.90   24.40
  -2  12  -4   71.79   24.20
  -2  12  -4   24.90   20.70
  -4 -12  -4  112.49   40.40
   4 -12   4  132.99   31.10
   4  12   4   42.30   24.00
   4  12   4   97.79   29.90
  -4  12  -4   82.89   26.30
  -4  12  -4   90.49   25.70
  -6 -12  -4   94.79   42.30
   6 -12   4   42.60   26.40
   6 -12   4   76.39   28.80
  -6  12  -4   51.19   26.50
   6  12   4   63.99   26.40
  -6  12  -4   65.99   25.60
   6  12   4   40.80   28.30
   8 -12   4   51.09   27.30
   8 -12   4  128.59   30.80
   8 -12   4   99.89   37.90
  -8 -12  -4   75.99   46.30
  -8  12  -4   54.49   26.80
   8  12   4   31.80   28.70
  -8  12  -4   62.59   28.80
   8  12   4   78.49   27.90
  10 -12   4   29.50   28.60
  10 -12   4   26.10   26.80
 -10 -12  -4   83.09   50.49
  10 -12   4   37.10   26.50
  10  12   4   13.50   29.60
 -10  12  -4   12.60   27.50
  10  12   4   15.10   27.10
 -10  12  -4   20.30   27.70
 -10  12  -4   55.99   28.90
 -12 -12  -4   53.99   53.39
  12 -12   4   27.50   28.80
  12 -12   4   98.39   30.00
 -12  12  -4   65.79   30.40
 -12  12  -4   60.69   30.60
  12  12   4   78.89   30.90
  12  12   4   40.60   31.70
  13 -13  -4  -33.00   27.70
  13 -13  -4   56.99   39.60
 -13  13   4    2.70   25.10
  13  13  -4   21.60   25.80
 -13  13   4   -8.70   36.40
  13  13  -4   10.50   28.20
  11 -13  -4   64.39   38.90
  11 -13  -4   74.49   30.80
 -11  13   4   69.09   38.10
  11  13  -4   76.19   27.70
  11  13  -4   63.49   30.40
 -11  13   4   33.20   26.40
   9 -13  -4   69.09   30.80
  -9 -13   4   98.69   29.60
   9 -13  -4  102.49   39.10
  -9  13   4   58.49   41.40
  -9  13   4   84.39   28.90
   9  13  -4   78.29   30.00
   9  13  -4   74.89   28.70
   7 -13  -4  143.29   37.90
   7 -13  -4   97.59   32.20
  -7 -13   4  113.79   29.40
  -7  13   4  148.19   33.10
  -7  13   4   58.59   43.30
  -7  13   4   76.59   28.10
   7  13  -4   93.29   28.50
   7  13  -4  113.49   31.00
   5 -13  -4   47.50   29.70
  -5 -13   4   55.99   26.60
   5 -13  -4   85.39   33.10
  -5  13   4   -9.90   22.90
  -5  13   4   44.60   25.70
   5  13  -4   30.10   24.10
   5  13  -4   14.10   25.00
  -3 -13   4   66.09   30.40
   3 -13  -4   74.69   32.40
   3 -13  -4   16.40   28.80
   3  13  -4   18.60   23.40
  -3  13   4   13.60   24.90
   3  13  -4   29.90   24.70
  -3  13   4   45.60   26.50
   1 -13  -4   44.90   30.30
   1 -13  -4   97.39   36.20
  -1 -13   4   70.19   30.10
  -1  13   4   53.99   26.90
  -1  13   4    1.30   25.50
   1  13  -4   32.40   25.20
   1  13  -4   73.99   26.00
   1 -13   4   63.69   31.20
  -1 -13  -4   63.19   37.80
  -1 -13  -4   75.49   32.20
   1  13   4   59.99   28.50
  -1  13  -4   85.09   27.80
   1  13   4   28.30   26.80
  -1  13  -4   62.09   23.80
   3 -13   4  140.69   36.00
  -3 -13  -4  189.88   45.40
  -3  13  -4  170.28   32.90
   3  13   4  114.69   31.80
   3  13   4  137.89   32.90
  -3  13  -4  138.19   32.60
   5 -13   4   63.49   31.60
  -5 -13  -4  133.39   44.80
   5 -13   4   59.19   27.90
   5  13   4  120.59   31.90
  -5  13  -4   56.79   28.20
  -5  13  -4   80.79   29.00
   5  13   4   39.60   29.50
  -7 -13  -4  103.89   47.70
   7 -13   4   91.69   32.00
   7 -13   4   64.09   28.60
  -7  13  -4   44.80   27.60
   7  13   4   33.80   28.50
   7  13   4   45.50   32.40
  -7  13  -4   33.00   28.40
   9 -13   4   22.20   28.70
  -9 -13  -4   65.89   50.09
   9 -13   4   -5.30   26.60
  -9  13  -4   -9.00   26.70
   9  13   4    5.20   26.70
  -9  13  -4  -44.10   26.80
   9  13   4  -37.60   27.80
  -6 -14   4   73.79   31.00
   6 -14  -4  147.79   38.50
   6 -14  -4   43.70   34.00
   6 -14  -4  105.49   31.10
   6  14  -4   87.09   31.70
  -6  14   4   68.89   31.00
   6  14  -4   80.69   29.20
  -6  14   4   58.99   29.60
   4 -14  -4  113.99   34.60
   4 -14  -4  185.98   40.30
  -4 -14   4  133.79   35.70
   4  14  -4   90.19   30.60
  -4  14   4   98.49   31.60
  -4  14   4   62.39   30.00
   4  14  -4  123.09   32.70
  -2 -14   4   95.69   32.70
   2 -14  -4  183.88   41.70
   2 -14  -4   50.99   33.30
  -2  14   4   46.10   28.20
   2  14  -4   67.99   27.80
   2  14  -4   54.49   30.40
  -2  14   4   10.50   27.50
   0 -14  -4   93.49   33.40
   0 -14  -4  161.68   43.00
   0 -14   4   75.89   34.20
   0  14  -4   53.79   27.20
   0  14  -4   78.19   31.00
   0  14   4   53.59   32.00
   0  14   4   48.60   30.30
  -2 -14  -4   98.69   41.20
  -2 -14  -4   31.80   32.40
   2 -14   4   79.49   35.90
   2  14   4   82.39   30.70
   2  14   4   57.79   30.30
  -2  14  -4   45.40   29.60
  28   0  -5   72.49   28.00
 -28   0   5   26.80   37.40
  28   0  -5   97.19   28.70
 -26   0   5  -34.20   30.90
  26   0  -5   28.70   27.70
  26   0  -5   37.60   23.40
  26   0  -5   -5.30   21.80
  24   0  -5   72.49   22.10
 -24   0   5  -31.70   25.60
  24   0  -5   18.10   19.70
  24   0  -5   33.80   26.80
 -24   0   5  -16.40   30.10
  22   0  -5   27.20   18.30
  22   0  -5   -6.80   15.80
 -22   0   5  -24.30   24.80
 -22   0   5  -18.60   21.60
  22   0  -5  -13.60   24.50
  20   0  -5   16.50   23.50
  20   0  -5   -4.10   13.80
 -20   0   5    2.50   22.30
  20   0  -5   14.30   15.20
 -20   0   5  -38.00   18.50
  18   0  -5   13.70   18.80
  18   0  -5   11.30   11.90
 -18   0   5    7.20   15.90
 -18   0   5   29.20   18.80
  18   0  -5   17.80   12.90
  16   0  -5    8.30   11.00
  16   0  -5   21.40   11.00
  16   0  -5   27.30   16.90
 -16   0   5   42.80   17.70
  14   0  -5   12.30    9.70
  14   0  -5   20.30   10.40
 -14   0   5   29.80   15.10
  14   0  -5   30.90   14.60
  12   0  -5   24.90    9.40
 -12   0   5   55.79   15.20
  12   0  -5   44.60   13.50
  12   0  -5   43.20   11.00
 -10   0   5    3.50    9.70
  10   0  -5    0.70    9.30
  10   0  -5   -7.60    7.50
  10   0  -5    1.60    6.90
   8   0  -5    1.40    7.60
   8   0  -5   -5.90    5.50
  -8   0   5    1.70    8.00
   8   0  -5   -6.00    5.80
   6   0  -5   11.30    5.90
  -6   0   5   16.70    7.10
   6   0  -5   10.30    7.10
   6   0  -5   -0.10    6.00
  -4   0   5    7.70    5.70
   4   0  -5   -4.90    6.40
   4   0  -5    8.60    6.30
  -4   0   5    3.90    4.40
   4   0  -5   12.50    5.50
  -2   0   5   72.79    8.10
   2   0  -5   74.69    9.20
   2   0  -5   80.19    9.20
   2   0  -5   64.99    9.70
   0   0  -5   24.80    8.10
   0   0   5   18.80    6.20
   0   0  -5   28.40    4.90
   0   0  -5   24.40    5.20
  -2   0  -5   64.69    7.00
   2   0   5   75.49    9.80
  -2   0  -5   62.29   10.20
  -4   0  -5    0.90    8.10
  -4   0  -5   -4.60    5.50
   4   0   5    6.40    7.30
   4   0   5   -5.60    5.90
  -4   0  -5   -1.30   11.20
  -6   0  -5    0.40    6.20
  -6   0  -5    1.10    8.80
   6   0   5    4.80    8.40
  -6   0  -5    6.80   13.90
   6   0   5    5.70    6.70
   8   0   5   59.49   12.10
  -8   0  -5   55.09    9.90
  -8   0  -5   71.29   18.00
   8   0   5   66.69   10.30
  -8   0  -5   59.79   12.10
 -10   0  -5   28.70   12.40
  10   0   5   31.50   10.20
 -10   0  -5   22.00   19.00
  10   0   5   32.10   12.10
 -10   0  -5   47.80   10.50
 -12   0  -5   84.59   14.10
 -12   0  -5   73.09   24.10
  12   0   5   77.79   16.00
  12   0   5   82.29   14.40
 -12   0  -5   83.19   17.30
  14   0   5   92.39   18.20
  14   0   5   84.29   16.70
 -14   0  -5   74.29   19.80
 -14   0  -5   68.49   26.90
 -16   0  -5   16.40   28.70
  16   0   5   31.40   16.40
 -16   0  -5   23.50   18.80
  16   0   5   16.30   16.90
 -18   0  -5  -26.50   29.90
  18   0   5   -6.60   17.80
  18   0   5    1.30   17.70
 -18   0  -5    3.80   19.80
 -20   0  -5   -2.60   22.60
  20   0   5  -22.80   22.30
  20   0   5   42.70   20.90
 -20   0  -5  -58.19   34.40
 -22   0  -5  -10.20   37.60
 -22   0  -5   23.30   25.00
  22   0   5    9.50   21.00
  22   0   5   -6.60   24.00
  29  -1  -5   41.40   30.20
  29  -1  -5   43.70   28.90
 -29  -1   5   -4.70   42.20
  29   1  -5   82.69   29.10
 -29   1   5   30.70   39.60
  27  -1  -5    7.80   26.50
 -27  -1   5   -4.20   36.00
  27  -1  -5   58.49   26.00
  27   1  -5   28.30   24.70
  27   1  -5   43.40   23.30
 -27   1   5    0.20   35.50
 -27   1   5    6.40   30.90
  27   1  -5   73.89   32.40
  25  -1  -5  113.89   27.80
  25  -1  -5  115.29   24.50
 -25  -1   5  126.29   39.00
  25  -1  -5  100.59   31.00
  25   1  -5  128.09   29.90
 -25   1   5  188.18   40.80
  25   1  -5  156.28   26.40
  25   1  -5  162.38   26.40
 -25   1   5   90.79   31.60
  23  -1  -5  129.69   25.70
  23  -1  -5  108.79   31.50
  23  -1  -5  130.49   23.00
 -23  -1   5  123.99   34.70
  23   1  -5  159.58   23.90
 -23   1   5   93.09   33.00
  23   1  -5  134.89   23.80
 -23   1   5   92.39   29.00
  23   1  -5  110.89   28.20
  21  -1  -5   23.00   24.50
  21  -1  -5   34.00   18.60
 -21  -1   5    4.70   23.50
  21  -1  -5    4.10   15.00
  21   1  -5  -17.20   15.80
  21   1  -5   -0.20   15.40
  21   1  -5   -0.10   22.80
 -21   1   5   16.80   24.50
 -21   1   5  -35.90   20.40
  19  -1  -5   43.40   22.80
  19  -1  -5   47.50   14.90
  19  -1  -5   53.79   16.20
 -19  -1   5   50.39   23.70
  19   1  -5   50.99   15.20
  19   1  -5   57.29   15.90
 -19   1   5   47.70   22.30
 -19   1   5    9.10   19.50
  19   1  -5   73.09   22.80
  17  -1  -5  360.26   24.50
 -17  -1   5  349.87   35.10
  17  -1  -5  417.06   28.80
  17   1  -5  396.66   32.60
  17   1  -5  343.37   24.80
  17   1  -5  343.07   25.50
 -17   1   5  344.77   33.60
 -17   1   5  283.77   30.70
 -15  -1   5 2697.93   74.09
  15  -1  -5 2737.63   58.29
  15  -1  -5 2768.62   64.59
  15  -1  -5 2845.22   66.89
  15   1  -5 2808.42   67.29
  15   1  -5 2653.73   60.49
 -15   1   5 2701.83   73.79
  15   1  -5 2711.03   58.59
 -15   1   5 2683.23   66.29
  13  -1  -5 1684.43   47.10
  13  -1  -5 1591.54   39.80
 -13  -1   5 1673.93   52.69
  13  -1  -5 1615.94   45.10
  13   1  -5 1616.54   42.70
  13   1  -5 1634.84   46.80
 -13   1   5 1631.64   52.49
  13   1  -5 1560.34   40.00
 -11  -1   5 2382.26   58.69
  11  -1  -5 2266.97   52.09
  11  -1  -5 2464.45   54.19
  11  -1  -5 2288.87   46.90
  11   1  -5 2245.28   47.00
  11   1  -5 2274.97   49.20
  11   1  -5 2381.56   54.39
 -11   1   5 2399.36   59.99
  -9  -1   5  299.57   20.00
   9  -1  -5  292.77   15.40
   9  -1  -5  299.47   18.70
   9  -1  -5  317.07   19.30
  -9   1   5  309.07   21.40
   9   1  -5  300.47   16.50
   9   1  -5  316.87   20.50
   9   1  -5  305.67   16.80
   7  -1  -5  132.79   13.70
   7  -1  -5  144.29   10.80
  -7  -1   5  147.89   14.30
   7  -1  -5  145.79   14.10
  -7  -1   5  139.99    8.80
   7   1  -5  149.19   13.40
  -7   1   5  146.89   15.10
   7   1  -5  180.68   16.00
   7   1  -5  154.18    9.10
   7   1  -5  158.58   12.90
   5  -1  -5 1872.31   39.30
   5  -1  -5 1889.61   33.90
  -5  -1   5 1894.31   34.50
   5  -1  -5 1931.61   39.70
   5   1  -5 1977.10   40.00
  -5   1   5 1889.31   42.90
   5   1  -5 1943.51   37.30
   5   1  -5 1872.11   38.90
   5   1  -5 1926.51   34.30
   3  -1  -5 2816.02   53.79
  -3  -1   5 2769.42   47.20
   3  -1  -5 2807.02   49.40
   3  -1  -5 2719.83   50.29
  -3   1   5 2856.51   46.50
  -3   1   5 2756.02   53.79
   3   1  -5 2827.82   48.80
   3   1  -5 2771.12   47.70
   3   1  -5 2749.43   50.69
   1  -1  -5 1756.62   36.50
   1  -1  -5 1773.82   34.00
   1  -1  -5 1706.23   39.30
  -1  -1   5 1677.63   34.40
  -1   1   5 1737.63   33.10
  -1   1   5 1694.33   38.90
   1   1  -5 1695.03   33.10
   1   1  -5 1711.13   31.60
   1   1  -5 1672.93   37.00
  -1   1   5 1760.32   34.30
  -1  -1  -5  973.80   30.90
   1  -1   5  933.01   25.40
  -1  -1  -5 1011.10   22.90
  -1  -1  -5  974.30   26.70
  -1   1  -5  943.41   23.40
   1   1   5 1019.50   26.00
   1   1   5  980.50   22.40
  -1   1  -5  983.20   28.50
  -3  -1  -5  264.37   12.60
   3  -1   5  263.67   15.80
  -3  -1  -5  249.88   21.80
  -3  -1  -5  255.07   17.10
   3   1   5  255.77   15.80
  -3   1  -5  259.77   18.10
  -3   1  -5  248.78   13.90
  -5  -1  -5  297.27   13.70
  -5  -1  -5  307.07   19.40
  -5  -1  -5  310.97   26.80
   5  -1   5  330.07   18.80
   5  -1   5  299.87   16.70
   5   1   5  300.97   13.70
  -5   1  -5  329.27   21.60
  -5   1  -5  270.97   16.00
   5   1   5  314.97   18.50
   7  -1   5  528.55   21.90
  -7  -1  -5  518.45   19.20
  -7  -1  -5  526.15   25.10
  -7  -1  -5  596.24   35.00
   7  -1   5  551.44   24.70
   7   1   5  557.54   24.30
  -7   1  -5  518.45   21.80
  -7   1  -5  541.95   28.00
  -7   1  -5  535.95   28.40
   7   1   5  541.65   19.40
  -9  -1  -5  642.44   38.80
  -9  -1  -5  609.44   22.80
   9  -1   5  587.94   27.10
  -9  -1  -5  592.04   28.10
   9  -1   5  606.94   25.00
   9   1   5  641.14   27.50
  -9   1  -5  543.65   30.50
  -9   1  -5  564.24   24.50
  -9   1  -5  571.84   32.80
   9   1   5  617.24   22.80
  11  -1   5 1370.46   39.60
  11  -1   5 1370.86   42.20
 -11  -1  -5 1393.36   55.79
 -11  -1  -5 1401.06   44.20
  11   1   5 1429.96   42.30
  11   1   5 1361.06   37.00
 -11   1  -5 1393.46   47.30
 -11   1  -5 1323.07   50.59
 -11   1  -5 1335.17   39.00
 -13  -1  -5  627.54   48.40
  13  -1   5  620.74   32.90
 -13  -1  -5  661.83   35.70
  13  -1   5  660.83   31.50
  13   1   5  666.43   29.50
  13   1   5  650.43   32.20
 -13   1  -5  618.54   30.80
 -13   1  -5  637.74   37.60
 -13   1  -5  625.44   41.80
  15  -1   5   54.39   17.30
 -15  -1  -5   40.30   30.30
 -15  -1  -5   63.49   18.60
  15  -1   5   74.89   18.10
  15   1   5   41.70   18.30
 -15   1  -5   74.19   18.20
  15   1   5   66.49   16.40
 -15   1  -5   71.99   27.60
 -15   1  -5   50.19   20.00
  17  -1   5    4.60   17.40
 -17  -1  -5   61.89   20.40
  17  -1   5   22.40   17.80
 -17  -1  -5   -2.90   32.50
  17   1   5   23.20   17.80
 -17   1  -5   15.90   20.70
 -17   1  -5   19.00   29.10
  17   1   5   34.00   16.90
  19  -1   5   15.10   20.40
  19  -1   5   28.80   21.80
 -19  -1  -5   21.60   21.10
 -19  -1  -5   30.40   36.30
  19  -1   5   16.80   24.30
 -19   1  -5   -6.10   22.10
 -19   1  -5    4.10   32.00
  19   1   5   61.79   19.30
  19   1   5   24.00   19.90
  19   1   5    9.40   20.60
  21  -1   5   30.10   23.60
 -21  -1  -5  -13.50   38.40
  21  -1   5   54.09   26.30
 -21  -1  -5   45.90   29.30
 -21   1  -5   43.20   39.10
 -21   1  -5   63.29   27.00
  21   1   5   62.89   21.40
  23  -1   5   40.80   25.00
  23  -1   5   57.49   30.10
 -23  -1  -5   -3.10   43.00
 -23   1  -5   48.10   28.00
 -23   1  -5   -9.60   40.30
  23   1   5   89.19   25.70
  28  -2  -5  -44.40   23.20
 -28  -2   5  -71.19   36.20
  28  -2  -5   27.10   28.70
 -28   2   5  -35.50   36.10
  28   2  -5   31.40   25.30
 -28   2   5  -14.70   32.90
 -26  -2   5   44.80   37.80
  26  -2  -5   56.39   25.30
  26  -2  -5   48.20   27.70
 -26   2   5   18.80   31.20
  26   2  -5   87.09   24.90
  26   2  -5  133.49   30.20
 -26   2   5   23.00   36.70
  24  -2  -5   16.20   24.60
 -24  -2   5   22.60   32.80
  24  -2  -5   15.90   19.80
  24  -2  -5  -10.50   27.80
 -24   2   5  -14.80   28.80
  24   2  -5   51.09   18.80
  24   2  -5   47.20   25.80
 -24   2   5   13.70   28.30
  24   2  -5   53.99   22.10
 -22  -2   5   17.70   28.70
  22  -2  -5  -14.90   16.10
  22  -2  -5    7.70   26.40
  22  -2  -5   13.10   21.30
 -22   2   5  -19.60   22.60
  22   2  -5    2.90   15.60
  22   2  -5  -10.20   17.40
 -22   2   5   -6.90   25.60
  22   2  -5   14.00   23.20
  20  -2  -5   80.29   17.70
  20  -2  -5   99.59   22.70
 -20  -2   5   80.29   28.10
  20  -2  -5   99.49   26.30
 -20   2   5   93.79   24.60
  20   2  -5   76.09   24.10
 -20   2   5   90.39   26.40
  20   2  -5   80.29   18.50
  20   2  -5   64.19   17.50
 -18  -2   5  535.15   41.80
  18  -2  -5  516.25   34.80
  18  -2  -5  530.05   29.30
  18  -2  -5  540.05   37.50
 -18   2   5  439.06   37.40
  18   2  -5  500.05   29.90
 -18   2   5  473.15   39.00
  18   2  -5  503.85   35.80
  18   2  -5  534.15   29.80
  16  -2  -5 2224.38   59.99
 -16  -2   5 2122.69   67.19
  16  -2  -5 2044.00   50.39
  16  -2  -5 2120.39   58.59
 -16   2   5 2065.99   60.89
  16   2  -5 1999.70   49.90
 -16   2   5 2018.00   65.29
  16   2  -5 2035.70   58.89
  16   2  -5 2101.69   52.09
  14  -2  -5 2989.80   69.09
  14  -2  -5 3140.59   68.99
  14  -2  -5 3026.70   60.89
 -14  -2   5 3074.79   77.19
  14   2  -5 2902.91   60.29
 -14   2   5 2972.30   76.69
 -14   2   5 3042.70   71.39
  14   2  -5 3077.29   61.99
  14   2  -5 2916.51   68.99
 -12  -2   5 4784.82   95.79
  12  -2  -5 4873.71   89.29
  12  -2  -5 4623.54   80.29
  12  -2  -5 4683.43   89.19
  12   2  -5 4780.42   90.39
  12   2  -5 4747.12   82.39
 -12   2   5 4666.03   90.99
 -12   2   5 4837.42   98.89
  12   2  -5 4718.43   81.99
 -10  -2   5  686.23   21.00
  10  -2  -5  688.53   27.40
 -10  -2   5  669.03   29.80
  10  -2  -5  687.93   27.50
  10  -2  -5  689.13   22.30
  10   2  -5  707.73   29.60
 -10   2   5  711.43   31.90
  10   2  -5  683.83   23.60
  10   2  -5  667.43   20.40
  10   2  -5  711.03   24.70
  -8  -2   5 1529.65   32.70
   8  -2  -5 1515.25   32.00
  -8  -2   5 1540.75   39.20
   8  -2  -5 1530.25   38.70
   8  -2  -5 1580.44   38.90
  -8   2   5 1556.24   43.90
   8   2  -5 1532.85   35.00
   8   2  -5 1489.15   34.50
   8   2  -5 1535.25   31.80
   8   2  -5 1590.94   40.30
   6  -2  -5  779.52   25.10
   6  -2  -5  846.22   25.90
   6  -2  -5  828.72   19.90
  -6  -2   5  850.21   22.50
  -6   2   5  834.82   29.90
   6   2  -5  833.22   27.10
   6   2  -5  838.52   23.90
   6   2  -5  821.42   23.70
   6   2  -5  832.72   21.70
   4  -2  -5  182.08   13.50
   4  -2  -5  179.98   15.70
  -4  -2   5  176.98   11.70
   4  -2  -5  170.68   13.30
   4   2  -5  196.18   14.30
   4   2  -5  169.18   13.00
  -4   2   5  173.38   12.00
   4   2  -5  181.08   11.60
   4   2  -5  179.48   14.70
  -4   2   5  183.98   10.30
  -4   2   5  175.58   16.00
   2  -2  -5 1102.59   28.30
   2  -2  -5 1188.68   34.60
  -2  -2   5 1200.18   28.40
   2  -2  -5 1175.18   29.00
   2   2  -5 1185.48   27.90
  -2   2   5 1158.58   28.00
   2   2  -5 1190.58   27.40
   2   2  -5 1226.08   27.80
  -2   2   5 1143.09   26.20
   2   2  -5 1158.98   29.60
  -2   2   5 1139.79   34.20
   0  -2  -5 1852.71   45.80
   0  -2  -5 1858.41   37.90
   0  -2   5 1930.11   39.50
   0  -2  -5 1865.51   38.70
   0   2   5 1804.52   37.70
   0   2  -5 1875.61   41.50
   0   2   5 1912.61   38.30
   0   2  -5 1835.42   37.40
  -2  -2  -5  150.48   14.70
  -2  -2  -5  154.48   13.00
   2  -2   5  153.98   13.70
  -2  -2  -5  143.59   20.10
  -2   2  -5  147.69   16.10
   2   2   5  160.48   13.40
   2   2   5  174.48   12.10
  -2   2  -5  158.18   13.00
  -4  -2  -5  337.47   18.40
   4  -2   5  358.46   19.30
  -4  -2  -5  313.67   26.90
  -4   2  -5  305.97   17.00
   4   2   5  344.37   16.20
  -4   2  -5  350.96   21.70
   4   2   5  338.67   18.70
   6  -2   5  915.51   30.80
  -6  -2  -5  850.51   40.90
  -6  -2  -5  843.02   28.40
   6  -2   5  805.12   27.60
   6   2   5  870.01   26.20
   6   2   5  856.01   29.20
  -6   2  -5  865.91   33.40
  -6   2  -5  818.32   26.90
   8  -2   5 1832.72   46.10
   8  -2   5 1690.63   42.30
  -8  -2  -5 1729.83   57.89
  -8  -2  -5 1693.03   42.90
  -8   2  -5 1706.63   49.60
   8   2   5 1704.13   40.60
   8   2   5 1688.23   44.00
  -8   2  -5 1687.03   41.90
 -10  -2  -5 1490.25   42.80
 -10  -2  -5 1474.15   58.79
  10  -2   5 1507.55   45.60
  10  -2   5 1534.85   42.10
 -10   2  -5 1507.75   48.30
  10   2   5 1438.76   39.80
  10   2   5 1468.35   36.20
  10   2   5 1552.74   43.80
 -10   2  -5 1427.86   41.10
 -10   2  -5 1519.95   49.80
  12  -2   5 1416.56   47.10
 -12  -2  -5 1570.74   64.99
 -12  -2  -5 1480.65   45.70
  12  -2   5 1509.45   44.40
 -12   2  -5 1491.25   53.09
 -12   2  -5 1509.65   44.00
  12   2   5 1417.66   42.00
 -12   2  -5 1429.96   51.69
  12   2   5 1502.15   39.40
  12   2   5 1445.36   45.30
  14  -2   5  309.37   29.40
 -14  -2  -5  343.37   29.90
 -14  -2  -5  363.06   46.80
 -14   2  -5  395.06   28.70
  14   2   5  376.96   25.30
 -14   2  -5  357.56   36.20
  14   2   5  311.07   28.80
 -14   2  -5  320.07   37.10
  16  -2   5  100.29   21.00
 -16  -2  -5   91.09   19.40
 -16  -2  -5   82.69   36.00
  16  -2   5  120.69   21.90
  16   2   5   64.09   20.30
  16   2   5   81.09   17.90
 -16   2  -5   65.89   29.30
 -16   2  -5   98.59   24.10
 -16   2  -5   83.49   20.50
  18  -2   5    2.60   18.30
 -18  -2  -5  -13.70   35.60
 -18  -2  -5   19.20   19.50
  18  -2   5    0.30   19.80
  18   2   5   10.40   19.70
 -18   2  -5   15.10   22.10
  18   2   5    6.70   16.20
 -18   2  -5  -23.80   28.70
  20  -2   5  -11.80   24.90
 -20  -2  -5  -48.60   37.40
  20  -2   5   14.70   23.30
  20   2   5  -18.00   19.50
 -20   2  -5  -13.00   31.60
  20   2   5    0.90   18.30
 -20   2  -5   14.40   25.10
  22  -2   5   37.20   27.30
  22  -2   5   63.09   26.30
 -22  -2  -5  -45.60   40.40
  22   2   5   46.50   22.90
 -22   2  -5   18.40   26.70
 -22   2  -5   30.90   38.80
 -27  -3   5    3.70   41.30
  27  -3  -5   93.09   30.50
 -27   3   5  109.29   39.30
  27   3  -5  182.58   33.30
  27   3  -5  132.49   29.00
 -27   3   5   10.80   35.10
  25  -3  -5   26.30   23.50
 -25  -3   5   17.00   36.80
  25  -3  -5   58.19   27.10
  25   3  -5  110.19   29.10
 -25   3   5   57.99   35.90
 -25   3   5   -0.30   30.70
  25   3  -5   66.59   23.70
 -23  -3   5   69.69   34.00
  23  -3  -5   15.30   30.70
  23  -3  -5   41.80   25.80
  23  -3  -5   59.39   21.70
  23   3  -5   73.49   22.30
 -23   3   5   63.59   29.30
 -23   3   5   41.60   30.20
  23   3  -5  104.79   27.20
  21  -3  -5   59.59   23.40
  21  -3  -5   67.99   28.80
  21  -3  -5   67.29   21.00
 -21  -3   5  119.69   33.30
  21   3  -5   90.89   18.50
 -21   3   5  106.79   31.10
  21   3  -5  115.69   21.40
  21   3  -5  114.69   25.50
 -21   3   5   96.39   26.70
  19  -3  -5  177.98   26.30
 -19  -3   5  227.88   34.90
  19  -3  -5  310.47   28.60
  19  -3  -5  297.47   34.60
 -19   3   5  293.37   37.10
  19   3  -5  259.57   28.10
  19   3  -5  258.57   27.20
  19   3  -5  304.97   32.90
 -19   3   5  239.18   29.70
  17  -3  -5  432.36   27.70
  17  -3  -5  363.86   32.30
  17  -3  -5  465.15   34.40
 -17  -3   5  421.36   38.70
  17   3  -5  400.46   32.20
  17   3  -5  329.27   23.20
 -17   3   5  420.96   36.40
  17   3  -5  408.66   27.20
  17   3  -5  369.96   25.40
 -17   3   5  495.95   36.30
  15  -3  -5  531.75   32.60
 -15  -3   5  544.75   38.20
  15  -3  -5  525.65   26.70
  15  -3  -5  598.14   32.70
 -15   3   5  479.35   34.80
 -15   3   5  519.15   34.80
  15   3  -5  536.95   32.80
  15   3  -5  549.45   25.60
  15   3  -5  541.25   27.30
  15   3  -5  518.25   24.00
  13  -3  -5  657.73   26.20
  13  -3  -5  644.84   32.30
 -13  -3   5  675.13   37.20
  13  -3  -5  690.03   31.60
  13   3  -5  645.84   26.90
  13   3  -5  643.64   24.80
  13   3  -5  628.34   24.50
  13   3  -5  634.84   33.10
 -13   3   5  683.53   35.60
 -13   3   5  693.53   36.40
  11  -3  -5 1098.49   36.20
 -11  -3   5 1132.79   40.90
  11  -3  -5 1087.59   30.20
  11  -3  -5 1114.29   37.70
  11   3  -5 1080.79   30.50
 -11   3   5 1110.49   42.20
  11   3  -5 1112.79   39.00
 -11   3   5 1059.39   39.80
  11   3  -5 1070.49   29.60
  11   3  -5 1111.09   32.70
   9  -3  -5  398.36   22.50
  -9  -3   5  353.56   18.20
  -9  -3   5  374.56   23.50
   9  -3  -5  355.96   16.50
   9  -3  -5  357.66   21.60
   9   3  -5  364.46   23.70
   9   3  -5  367.76   18.00
   9   3  -5  313.17   16.90
   9   3  -5  332.97   19.90
  -9   3   5  339.17   25.00
   7  -3  -5 1496.25   38.90
   7  -3  -5 1453.35   29.80
  -7  -3   5 1507.85   35.70
   7  -3  -5 1471.75   38.20
  -7   3   5 1510.75   45.00
   7   3  -5 1484.25   39.40
   7   3  -5 1461.85   34.20
   7   3  -5 1445.46   33.30
   7   3  -5 1505.05   35.40
  -7   3   5 1483.85   36.80
   5  -3  -5  111.79   16.50
   5  -3  -5  117.49   12.80
   5  -3  -5   96.99   10.90
  -5  -3   5  105.99   12.20
  -5   3   5  100.79   10.10
  -5   3   5  123.49   17.00
  -5   3   5  121.59   12.00
   5   3  -5  111.49   12.70
   5   3  -5  107.39   12.90
   5   3  -5  124.29   13.50
   5   3  -5  103.09   11.30
   3  -3  -5  112.99   12.20
  -3  -3   5  124.69   12.60
   3  -3  -5  145.99   13.60
   3  -3  -5  144.39   17.20
  -3   3   5  121.19   16.60
  -3   3   5  133.19   11.20
   3   3  -5  130.89   12.90
   3   3  -5  120.99   13.60
   3   3  -5  121.59   13.10
   3   3  -5  110.79   11.50
  -3   3   5  119.69   12.10
   1  -3  -5  205.98   14.50
  -1  -3   5  211.58   14.50
   1  -3  -5  207.28   19.70
   1  -3  -5  214.28   15.60
  -1   3   5  212.68   20.00
  -1   3   5  200.28   14.30
   1   3  -5  209.78   14.00
   1   3  -5  219.58   13.20
  -1   3   5  213.48   13.70
   1   3  -5  213.38   16.60
   1   3  -5  203.88   14.10
  -1  -3  -5  214.68   15.70
  -1  -3  -5  205.08   22.10
  -1  -3  -5  244.08   18.00
   1  -3   5  223.38   15.70
   1   3   5  216.08   15.10
  -1   3  -5  207.48   17.80
   1   3   5  238.78   15.40
  -1   3  -5  233.58   15.40
   3  -3   5  347.77   19.80
  -3  -3  -5  341.07   29.00
  -3  -3  -5  353.06   18.50
  -3   3  -5  334.37   22.30
   3   3   5  343.17   18.40
  -3   3  -5  338.07   18.50
   3   3   5  338.87   19.00
  -5  -3  -5  575.64   21.80
  -5  -3  -5  528.85   36.50
   5  -3   5  531.65   25.50
  -5   3  -5  518.45   23.00
   5   3   5  565.44   23.60
[truncated: 656,677 more chars]
