# Supplementary material
Source: publisher figshare collection journal article supplement (https://acs.figshare.com/ndownloader/files/22494656)
Supplement: Supplementary file 1 [file 22494656 › CIF/1P.cif]

data_1p
_audit_creation_date               2019-03-12
_audit_creation_method
;
Olex2 1.2
(compiled 2018.05.29 svn.r3508 for OlexSys, GUI svn.r5506)
;
_shelx_SHELXL_version_number       '2016/6'
_audit_contact_author_address      ?
_audit_contact_author_email        ?
_audit_contact_author_name         ''
_audit_contact_author_phone        ?
_publ_contact_author_id_orcid      ?
_publ_section_references
;
Dolomanov, O.V., Bourhis, L.J., Gildea, R.J, Howard, J.A.K. & Puschmann, H.
 (2009), J. Appl. Cryst. 42, 339-341.

Sheldrick, G.M. (2008). Acta Cryst. A64, 112-122.
;
_chemical_name_common              ?
_chemical_name_systematic          ?
_chemical_formula_moiety           'C22 H15.95 Cu I N3 O, C1 Cl4'
_chemical_formula_sum              'C23 H15.95 Cl4 Cu I N3 O'
_chemical_formula_weight           682.57
_chemical_melting_point            ?
loop_
  _atom_type_symbol
  _atom_type_description
  _atom_type_scat_dispersion_real
  _atom_type_scat_dispersion_imag
  _atom_type_scat_source
 'C' 'C' 0.0033 0.0016 'International Tables Vol C Tables 4.2.6.8 and 6.1.1.4'
 'H' 'H' 0.0000 0.0000 'International Tables Vol C Tables 4.2.6.8 and 6.1.1.4'
 'Cl' 'Cl' 0.1484 0.1585 'International Tables Vol C Tables 4.2.6.8 and 6.1.1.4'
 'Cu' 'Cu' 0.3201 1.2651 'International Tables Vol C Tables 4.2.6.8 and 6.1.1.4'
 'I' 'I' -0.4742 1.8119 'International Tables Vol C Tables 4.2.6.8 and 6.1.1.4'
 'N' 'N' 0.0061 0.0033 'International Tables Vol C Tables 4.2.6.8 and 6.1.1.4'
 'O' 'O' 0.0106 0.0060 'International Tables Vol C Tables 4.2.6.8 and 6.1.1.4'

_shelx_space_group_comment
;
The symmetry employed for this shelxl refinement is uniquely defined
by the following loop, which should always be used as a source of
symmetry information in preference to the above space-group names.
They are only intended as comments.
;
_space_group_crystal_system        'monoclinic'
_space_group_IT_number             15
_space_group_name_H-M_alt          'C 1 2/c 1'
_space_group_name_Hall             '-C 2yc'
loop_
  _space_group_symop_operation_xyz
 'x, y, z'
 '-x, y, -z+1/2'
 'x+1/2, y+1/2, z'
 '-x+1/2, y+1/2, -z+1/2'
 '-x, -y, -z'
 'x, -y, z-1/2'
 '-x+1/2, -y+1/2, -z'
 'x+1/2, -y+1/2, z-1/2'

_cell_length_a                     24.282(3)
_cell_length_b                     12.4370(14)
_cell_length_c                     17.961(2)
_cell_angle_alpha                  90
_cell_angle_beta                   112.100(4)
_cell_angle_gamma                  90
_cell_volume                       5025.5(10)
_cell_formula_units_Z              8
_cell_measurement_reflns_used      9910
_cell_measurement_temperature      109(2)
_cell_measurement_theta_max        25.42
_cell_measurement_theta_min        2.42
_shelx_estimated_absorpt_T_max     0.394
_shelx_estimated_absorpt_T_min     0.330
_exptl_absorpt_coefficient_mu      2.545
_exptl_absorpt_correction_T_max    0.7452
_exptl_absorpt_correction_T_min    0.4736
_exptl_absorpt_correction_type     multi-scan
_exptl_absorpt_process_details    
 'SADABS-2016/2 (Bruker,2016/2) was used for absorption correction. wR2(int) was 0.1103 before and 0.0724 after correction. The Ratio of minimum to maximum transmission is 0.6355. The \l/2 correction factor is Not present.'
_exptl_absorpt_special_details     ?
_exptl_crystal_colour              'clear dark black'
_exptl_crystal_colour_lustre       clear
_exptl_crystal_colour_modifier     dark
_exptl_crystal_colour_primary      black
_exptl_crystal_density_diffrn      1.804
_exptl_crystal_density_meas        ?
_exptl_crystal_density_method      ?
_exptl_crystal_description         block
_exptl_crystal_F_000               2664
_exptl_crystal_size_max            0.56
_exptl_crystal_size_mid            0.53
_exptl_crystal_size_min            0.45
_exptl_transmission_factor_max     ?
_exptl_transmission_factor_min     ?
_diffrn_reflns_av_R_equivalents    0.0511
_diffrn_reflns_av_unetI/netI       0.0425
_diffrn_reflns_Laue_measured_fraction_full  0.999
_diffrn_reflns_Laue_measured_fraction_max  0.996
_diffrn_reflns_limit_h_max         29
_diffrn_reflns_limit_h_min         -25
_diffrn_reflns_limit_k_max         14
_diffrn_reflns_limit_k_min         -15
_diffrn_reflns_limit_l_max         21
_diffrn_reflns_limit_l_min         -21
_diffrn_reflns_number              21459
_diffrn_reflns_point_group_measured_fraction_full  0.999
_diffrn_reflns_point_group_measured_fraction_max  0.996
_diffrn_reflns_theta_full          25.242
_diffrn_reflns_theta_max           25.476
_diffrn_reflns_theta_min           2.041
_diffrn_ambient_temperature        108.77
_diffrn_detector_area_resol_mean   ?
_diffrn_measured_fraction_theta_full  0.999
_diffrn_measured_fraction_theta_max  0.996
_diffrn_measurement_device_type    'Bruker APEX-II CCD'
_diffrn_measurement_method         '\f and \w scans'
_diffrn_radiation_type             MoK\a
_diffrn_radiation_wavelength       0.71073
_diffrn_source                     ?
_reflns_Friedel_coverage           0.000
_reflns_Friedel_fraction_full      .
_reflns_Friedel_fraction_max       .
_reflns_number_gt                  4087
_reflns_number_total               4644
_reflns_special_details
;
 Reflections were merged by SHELXL according to the crystal
 class for the calculation of statistics and refinement.
 
 _reflns_Friedel_fraction is defined as the number of unique
 Friedel pairs measured divided by the number that would be
 possible theoretically, ignoring centric projections and
 systematic absences.
;
_reflns_threshold_expression       'I > 2\s(I)'
_computing_cell_refinement         'SAINT V8.38A (?, 2016)'
_computing_data_collection         ?
_computing_data_reduction          'SAINT V8.38A (?, 2016)'
_computing_molecular_graphics      'Olex2 (Dolomanov et al., 2009)'
_computing_publication_material    'Olex2 (Dolomanov et al., 2009)'
_computing_structure_refinement    'XL (Sheldrick, 2008)'
_computing_structure_solution      'ShelXS (Sheldrick, 2008)'
_refine_diff_density_max           2.015
_refine_diff_density_min           -2.918
_refine_diff_density_rms           0.243
_refine_ls_extinction_coef         .
_refine_ls_extinction_method       none
_refine_ls_goodness_of_fit_ref     1.266
_refine_ls_hydrogen_treatment      constr
_refine_ls_matrix_type             full
_refine_ls_number_parameters       348
_refine_ls_number_reflns           4644
_refine_ls_number_restraints       1
_refine_ls_R_factor_all            0.1089
_refine_ls_R_factor_gt             0.0983
_refine_ls_restrained_S_all        1.266
_refine_ls_shift/su_max            0.001
_refine_ls_shift/su_mean           0.000
_refine_ls_structure_factor_coef   Fsqd
_refine_ls_weighting_details      
 'w=1/[\s^2^(Fo^2^)+412.9888P] where P=(Fo^2^+2Fc^2^)/3'
_refine_ls_weighting_scheme        calc
_refine_ls_wR_factor_gt            0.2325
_refine_ls_wR_factor_ref           0.2385
_refine_special_details            ?
_olex2_refinement_description
;
1. Fixed Uiso
 At 1.2 times of:
  All C(H) groups
 At 1.5 times of:
  All C(H,H,H) groups
2. Restrained distances
 Cl2A-C23A
 1.5 with sigma of 0.02
3. Uiso/Uaniso restraints and constraints
Uanis(C23A) = Uanis(C6)
Uanis(C0AA) = Uanis(C9)
Uanis(C20A) = Uanis(C21A)
Uanis(C19B) = Uanis(C17)
Uanis(C2) = Uanis(C1)
Uanis(C22A) = Uanis(C19A)
Uanis(O1B) = Uanis(O1A)
4. Others
 Fixed Sof: Cl2A(0.4395) Cl3A(0.4395) Cl1A(0.4395) C23A(0.4395) C22A(0.47353)
 H22A(0.47353) H22B(0.47353) H22C(0.47353) H17(0.47353) O1A(0.47353)
 H18(0.47353) C20A(0.47353) C19A(0.47353) H19A(0.47353) C21A(0.47353)
 H21A(0.47353) Cl4A(0.4395) Cl2B(0.5605) Cl1B(0.5605) Cl4B(0.5605) Cl3B(0.5605)
 C0AA(0.5605) O1B(0.52647) C19B(0.52647) H19B(0.52647) C21B(0.52647)
 H21B(0.52647) C20B(0.52647) C22B(0.52647) H22D(0.52647) H22E(0.52647)
 H22F(0.52647)
5.a Aromatic/amide H refined with riding coordinates:
 C9(H9), C23B(H23B), C14(H14), C13(H13), C15(H15), C12(H12), C7(H7), C1(H1),
 C4(H4), C17(H17), C18(H18), C19A(H19A), C21A(H21A), C2(H2), C19B(H19B),
 C21B(H21B)
5.b Idealised Me refined as rotating group:
 C22A(H22A,H22B,H22C), C22B(H22D,H22E,H22F)
;
_atom_sites_solution_hydrogens     geom
_atom_sites_solution_primary       direct
_atom_sites_solution_secondary     ?
loop_
  _atom_site_label
  _atom_site_type_symbol
  _atom_site_fract_x
  _atom_site_fract_y
  _atom_site_fract_z
  _atom_site_U_iso_or_equiv
  _atom_site_adp_type
  _atom_site_occupancy
  _atom_site_site_symmetry_order
  _atom_site_calc_flag
  _atom_site_refinement_flags_posn
  _atom_site_refinement_flags_adp
  _atom_site_refinement_flags_occupancy
  _atom_site_disorder_assembly
  _atom_site_disorder_group
 I001 I 0.45622(4) 1.14576(8) 0.53693(5) 0.0292(3) Uani 1 1 d . . . . .
 Cu02 Cu 0.49916(7) 0.94689(13) 0.56246(9) 0.0231(4) Uani 1 1 d . . . . .
 Cl2A Cl 0.4004(10) 0.4345(14) 0.2721(10) 0.103(5) Uani 0.4395 1 d D . P A 1
 Cl3A Cl 0.490(2) 0.397(3) 0.413(2) 0.20(2) Uani 0.4395 1 d . . P A 1
 N2 N 0.4267(5) 0.8531(9) 0.5437(6) 0.026(2) Uani 1 1 d . . . . .
 N1 N 0.0657(4) 0.5520(9) 0.1725(6) 0.023(2) Uani 1 1 d . . . . .
 Cl1A Cl 0.3862(10) 0.488(2) 0.4216(17) 0.166(12) Uani 0.4395 1 d . . P A 1
 N4 N 0.2467(5) 0.6141(9) 0.4225(6) 0.025(2) Uani 1 1 d . . . . .
 C9 C 0.2097(6) 0.4488(12) 0.4562(8) 0.030(3) Uani 1 1 d . . . . .
 H9 H 0.180336 0.393910 0.440604 0.036 Uiso 1 1 calc R . . . .
 C3 C 0.3363(5) 0.6969(11) 0.5120(7) 0.022(3) Uani 1 1 d . . . . .
 C23B C 0.4205(6) 0.7934(12) 0.6027(8) 0.031(3) Uani 1 1 d . . . . .
 H23B H 0.448088 0.804120 0.656074 0.038 Uiso 1 1 calc R . . . .
 C14 C 0.1120(6) 0.6172(11) 0.1928(8) 0.028(3) Uani 1 1 d . . . . .
 H14 H 0.113981 0.668239 0.154489 0.034 Uiso 1 1 calc R . . . .
 C10 C 0.2063(6) 0.5349(11) 0.4058(7) 0.024(3) Uani 1 1 d . . . . .
 C23A C 0.4279(13) 0.472(2) 0.3548(13) 0.026(3) Uani 0.4395 1 d D . P A 1
 C13 C 0.0642(6) 0.4827(14) 0.2282(8) 0.036(4) Uani 1 1 d . . . . .
 H13 H 0.030980 0.435869 0.214375 0.044 Uiso 1 1 calc R . . . .
 C15 C 0.1586(5) 0.6143(10) 0.2689(7) 0.023(3) Uani 1 1 d . . . . .
 H15 H 0.191151 0.662462 0.281141 0.028 Uiso 1 1 calc R . . . .
 C6 C 0.2915(6) 0.6111(11) 0.4944(8) 0.026(3) Uani 1 1 d . . . . .
 C11 C 0.1566(5) 0.5409(11) 0.3255(7) 0.024(3) Uani 1 1 d . . . . .
 C8 C 0.2578(6) 0.4440(11) 0.5313(7) 0.028(3) Uani 1 1 d . . . . .
 C12 C 0.1072(6) 0.4738(14) 0.3042(8) 0.033(3) Uani 1 1 d . . . . .
 H12 H 0.103277 0.422928 0.341331 0.040 Uiso 1 1 calc R . . . .
 C7 C 0.2986(6) 0.5277(11) 0.5497(7) 0.025(3) Uani 1 1 d . . . . .
 H7 H 0.331348 0.528391 0.599758 0.031 Uiso 1 1 calc R . . . .
 C1 C 0.3860(6) 0.8361(15) 0.4703(8) 0.042(3) Uani 1 1 d . . . . .
 H1 H 0.388336 0.877686 0.427190 0.050 Uiso 1 1 calc R . . . .
 C16 C 0.2643(7) 0.3549(12) 0.5887(8) 0.036(3) Uani 1 1 d . . . . .
 C22A C 0.2589(17) 0.078(3) 0.786(3) 0.039(7) Uani 0.4735 1 d . . P B 1
 H22A H 0.234176 0.043641 0.734879 0.059 Uiso 0.4735 1 calc GR . P B 1
 H22B H 0.234821 0.129613 0.801498 0.059 Uiso 0.4735 1 calc GR . P B 1
 H22C H 0.274630 0.023286 0.827376 0.059 Uiso 0.4735 1 calc GR . P B 1
 C4 C 0.3769(6) 0.7185(12) 0.5902(8) 0.033(3) Uani 1 1 d . . . . .
 H4 H 0.374006 0.680713 0.634508 0.039 Uiso 1 1 calc R . . . .
 C17 C 0.2164(7) 0.2935(13) 0.5884(9) 0.036(3) Uani 1 1 d . . . . .
 H17 H 0.177655 0.296096 0.547760 0.044 Uiso 0.4735 1 calc R . P C 1
 O1A O 0.3062(12) 0.132(3) 0.7752(18) 0.040(5) Uani 0.4735 1 d . . P B 1
 C18 C 0.3206(10) 0.3311(14) 0.6496(10) 0.060(6) Uani 1 1 d . . . . .
 H18 H 0.351255 0.378666 0.649582 0.072 Uiso 0.4735 1 calc R . P D 1
 C20A C 0.290(2) 0.204(4) 0.712(3) 0.029(9) Uani 0.4735 1 d . . P B 1
 C19A C 0.2333(18) 0.227(4) 0.657(3) 0.039(7) Uani 0.4735 1 d . . P B 1
 H19A H 0.201525 0.193254 0.666440 0.047 Uiso 0.4735 1 calc R . P B 1
 C21A C 0.3395(19) 0.255(4) 0.707(2) 0.029(9) Uani 0.4735 1 d . . P B 1
 H21A H 0.379818 0.239629 0.739215 0.035 Uiso 0.4735 1 calc R . P B 1
 C2 C 0.3412(7) 0.7628(15) 0.4533(9) 0.042(3) Uani 1 1 d . . . . .
 H2 H 0.312859 0.757062 0.399913 0.050 Uiso 1 1 calc R . . . .
 Cl4A Cl 0.4682(10) 0.6220(16) 0.3759(12) 0.113(7) Uani 0.4395 1 d . . P A 1
 Cl2B Cl 0.4700(7) 0.3682(10) 0.4235(8) 0.069(4) Uani 0.5605 1 d . . P E 2
 Cl1B Cl 0.5470(4) 0.5342(8) 0.4021(6) 0.066(2) Uani 0.5605 1 d . . P E 2
 Cl4B Cl 0.4260(6) 0.5801(9) 0.3747(8) 0.086(3) Uani 0.5605 1 d . . P E 2
 Cl3B Cl 0.4535(7) 0.4451(13) 0.2619(7) 0.108(5) Uani 0.5605 1 d . . P E 2
 C0AA C 0.4706(11) 0.481(2) 0.3627(14) 0.030(3) Uani 0.5605 1 d . . P E 2
 O1B O 0.2736(12) 0.114(2) 0.7603(17) 0.040(5) Uani 0.5265 1 d . . P B 2
 C19B C 0.2112(16) 0.207(3) 0.636(2) 0.036(3) Uani 0.5265 1 d . . P B 2
 H19B H 0.176189 0.165349 0.625405 0.044 Uiso 0.5265 1 calc R . P B 2
 C21B C 0.314(2) 0.252(5) 0.712(2) 0.038(14) Uani 0.5265 1 d . . P B 2
 H21B H 0.346598 0.244187 0.761729 0.046 Uiso 0.5265 1 calc R . P B 2
 C20B C 0.264(2) 0.191(3) 0.700(3) 0.034(10) Uani 0.5265 1 d . . P B 2
 C22B C 0.2249(19) 0.041(3) 0.748(2) 0.057(10) Uani 0.5265 1 d . . P B 2
 H22D H 0.210753 0.013126 0.693118 0.086 Uiso 0.5265 1 calc GR . P B 2
 H22E H 0.192420 0.079482 0.756598 0.086 Uiso 0.5265 1 calc GR . P B 2
 H22F H 0.238251 -0.018490 0.786309 0.086 Uiso 0.5265 1 calc GR . P B 2

loop_
  _atom_site_aniso_label
  _atom_site_aniso_U_11
  _atom_site_aniso_U_22
  _atom_site_aniso_U_33
  _atom_site_aniso_U_23
  _atom_site_aniso_U_13
  _atom_site_aniso_U_12
 I001 0.0328(5) 0.0289(5) 0.0287(5) -0.0030(4) 0.0150(4) 0.0004(4)
 Cu02 0.0209(8) 0.0281(8) 0.0171(8) -0.0002(6) 0.0036(6) -0.0045(7)
 Cl2A 0.133(15) 0.085(11) 0.084(11) 0.008(9) 0.032(11) -0.014(11)
 Cl3A 0.30(5) 0.20(3) 0.125(19) 0.11(2) 0.12(3) 0.18(3)
 N2 0.028(6) 0.023(5) 0.026(6) -0.001(5) 0.011(5) 0.006(5)
 N1 0.015(5) 0.037(6) 0.012(5) 0.000(5) 0.000(4) -0.003(5)
 Cl1A 0.129(17) 0.17(2) 0.24(3) -0.13(2) 0.120(19) -0.061(16)
 N4 0.023(6) 0.036(6) 0.019(5) 0.000(5) 0.009(5) 0.000(5)
 C9 0.028(6) 0.041(7) 0.014(5) -0.001(5) -0.001(5) 0.009(6)
 C3 0.018(6) 0.029(7) 0.017(6) -0.002(5) 0.003(5) 0.005(5)
 C23B 0.031(7) 0.034(8) 0.022(7) -0.003(6) 0.002(6) -0.003(6)
 C14 0.030(7) 0.025(7) 0.018(6) 0.006(5) -0.002(5) -0.003(6)
 C10 0.019(6) 0.036(7) 0.018(6) -0.009(5) 0.007(5) 0.002(6)
 C23A 0.022(6) 0.026(6) 0.024(6) 0.007(5) 0.002(5) 0.008(5)
 C13 0.020(7) 0.061(10) 0.025(7) 0.018(7) 0.005(6) -0.003(7)
 C15 0.016(6) 0.024(6) 0.022(6) 0.007(5) -0.001(5) 0.003(5)
 C6 0.022(6) 0.026(6) 0.024(6) 0.007(5) 0.002(5) 0.008(5)
 C11 0.016(6) 0.039(8) 0.016(6) 0.004(5) 0.005(5) 0.008(6)
 C8 0.036(8) 0.032(7) 0.011(6) -0.003(5) 0.003(5) 0.009(6)
 C12 0.019(7) 0.062(10) 0.021(7) 0.009(7) 0.010(6) -0.003(7)
 C7 0.033(7) 0.030(7) 0.014(6) 0.000(5) 0.008(5) 0.007(6)
 C1 0.030(5) 0.068(8) 0.021(5) 0.001(5) 0.001(4) -0.024(6)
 C16 0.054(9) 0.025(7) 0.020(7) -0.010(6) 0.006(6) 0.010(7)
 C22A 0.034(16) 0.044(16) 0.043(17) 0.021(14) 0.019(14) 0.018(13)
 C4 0.036(8) 0.030(8) 0.026(7) 0.010(6) 0.005(6) -0.001(6)
 C17 0.045(8) 0.046(8) 0.025(7) 0.013(6) 0.021(6) 0.020(7)
 O1A 0.054(15) 0.045(11) 0.037(11) 0.013(8) 0.036(15) 0.015(14)
 C18 0.083(14) 0.030(9) 0.032(9) 0.001(7) -0.017(9) -0.007(9)
 C20A 0.04(2) 0.022(13) 0.021(13) 0.009(10) 0.000(14) 0.009(17)
 C19A 0.034(16) 0.044(16) 0.043(17) 0.021(14) 0.019(14) 0.018(13)
 C21A 0.04(2) 0.022(13) 0.021(13) 0.009(10) 0.000(14) 0.009(17)
 C2 0.030(5) 0.068(8) 0.021(5) 0.001(5) 0.001(4) -0.024(6)
 Cl4A 0.138(16) 0.109(14) 0.123(14) 0.067(12) 0.083(14) 0.053(13)
 Cl2B 0.091(8) 0.044(5) 0.057(7) -0.005(5) 0.012(6) 0.005(5)
 Cl1B 0.061(5) 0.056(5) 0.075(6) -0.014(5) 0.018(5) 0.001(4)
 Cl4B 0.074(7) 0.062(6) 0.100(9) -0.002(6) 0.009(7) 0.025(6)
 Cl3B 0.118(11) 0.121(11) 0.057(7) -0.015(7) 0.002(7) -0.007(9)
 C0AA 0.028(6) 0.041(7) 0.014(5) -0.001(5) -0.001(5) 0.009(6)
 O1B 0.054(15) 0.045(11) 0.037(11) 0.013(8) 0.036(15) 0.015(14)
 C19B 0.045(8) 0.046(8) 0.025(7) 0.013(6) 0.021(6) 0.020(7)
 C21B 0.05(4) 0.033(18) 0.025(18) -0.012(15) 0.00(2) 0.01(2)
 C20B 0.05(2) 0.026(18) 0.04(2) -0.017(15) 0.03(2) -0.001(19)
 C22B 0.07(3) 0.06(2) 0.06(2) 0.03(2) 0.04(2) 0.01(2)

_geom_special_details
;
 All esds (except the esd in the dihedral angle between two l.s. planes)
 are estimated using the full covariance matrix.  The cell esds are taken
 into account individually in the estimation of esds in distances, angles
 and torsion angles; correlations between esds in cell parameters are only
 used when they are defined by crystal symmetry.  An approximate (isotropic)
 treatment of cell esds is used for estimating esds involving l.s. planes.
;
loop_
  _geom_bond_atom_site_label_1
  _geom_bond_atom_site_label_2
  _geom_bond_distance
  _geom_bond_site_symmetry_2
  _geom_bond_publ_flag
 I001 Cu02 2.6561(19) . ?
 I001 Cu02 2.6728(18) 5_676 ?
 Cu02 Cu02 2.617(3) 5_676 ?
 Cu02 N2 2.031(11) . ?
 Cu02 N1 2.029(10) 8_566 ?
 Cl2A C23A 1.457(18) . ?
 Cl3A C23A 1.75(4) . ?
 N2 C23B 1.349(18) . ?
 N2 C1 1.333(17) . ?
 N1 C14 1.322(17) . ?
 N1 C13 1.330(17) . ?
 Cl1A C23A 1.85(3) . ?
 N4 C10 1.342(17) . ?
 N4 C6 1.340(16) . ?
 C9 H9 0.9500 . ?
 C9 C10 1.38(2) . ?
 C9 C8 1.415(18) . ?
 C3 C6 1.471(19) . ?
 C3 C4 1.404(18) . ?
 C3 C2 1.38(2) . ?
 C23B H23B 0.9500 . ?
 C23B C4 1.36(2) . ?
 C14 H14 0.9500 . ?
 C14 C15 1.408(17) . ?
 C10 C11 1.495(17) . ?
 C23A Cl4A 2.07(4) . ?
 C13 H13 0.9500 . ?
 C13 C12 1.376(19) . ?
 C15 H15 0.9500 . ?
 C15 C11 1.380(18) . ?
 C6 C7 1.402(18) . ?
 C11 C12 1.391(19) . ?
 C8 C7 1.39(2) . ?
 C8 C16 1.48(2) . ?
 C12 H12 0.9500 . ?
 C7 H7 0.9500 . ?
 C1 H1 0.9500 . ?
 C1 C2 1.36(2) . ?
 C16 C17 1.39(2) . ?
 C16 C18 1.42(2) . ?
 C22A H22A 0.9800 . ?
 C22A H22B 0.9800 . ?
 C22A H22C 0.9800 . ?
 C22A O1A 1.40(5) . ?
 C4 H4 0.9500 . ?
 C17 H17 0.9500 . ?
 C17 C19A 1.41(5) . ?
 C17 C19B 1.41(4) . ?
 O1A C20A 1.38(6) . ?
 C18 H18 0.9500 . ?
 C18 C21A 1.35(5) . ?
 C18 C21B 1.55(6) . ?
 C20A C19A 1.39(5) . ?
 C20A C21A 1.39(7) . ?
 C19A H19A 0.9500 . ?
 C21A H21A 0.9500 . ?
 C2 H2 0.9500 . ?
 Cl2B C0AA 1.78(3) . ?
 Cl1B C0AA 1.84(3) . ?
 Cl4B C0AA 1.70(3) . ?
 Cl3B Cl3B 2.45(4) 2_655 ?
 Cl3B C0AA 1.76(3) . ?
 O1B C20B 1.39(5) . ?
 O1B C22B 1.44(5) . ?
 C19B H19B 0.9500 . ?
 C19B C20B 1.38(6) . ?
 C21B H21B 0.9500 . ?
 C21B C20B 1.37(5) . ?
 C22B H22D 0.9800 . ?
 C22B H22E 0.9800 . ?
 C22B H22F 0.9800 . ?

loop_
  _geom_angle_atom_site_label_1
  _geom_angle_atom_site_label_2
  _geom_angle_atom_site_label_3
  _geom_angle
  _geom_angle_site_symmetry_1
  _geom_angle_site_symmetry_3
  _geom_angle_publ_flag
 Cu02 I001 Cu02 58.83(6) . 5_676 ?
 I001 Cu02 I001 121.17(6) . 5_676 ?
 Cu02 Cu02 I001 60.27(6) 5_676 5_676 ?
 Cu02 Cu02 I001 60.90(7) 5_676 . ?
 N2 Cu02 I001 100.7(3) . 5_676 ?
 N2 Cu02 I001 104.3(3) . . ?
 N2 Cu02 Cu02 116.1(3) . 5_676 ?
 N1 Cu02 I001 106.2(3) 8_566 5_676 ?
 N1 Cu02 I001 106.2(3) 8_566 . ?
 N1 Cu02 Cu02 124.6(3) 8_566 5_676 ?
 N1 Cu02 N2 119.3(4) 8_566 . ?
 C23B N2 Cu02 122.1(9) . . ?
 C1 N2 Cu02 121.9(10) . . ?
 C1 N2 C23B 115.4(12) . . ?
 C14 N1 Cu02 123.2(9) . 8_465 ?
 C14 N1 C13 116.8(11) . . ?
 C13 N1 Cu02 120.0(9) . 8_465 ?
 C6 N4 C10 117.0(12) . . ?
 C10 C9 H9 120.6 . . ?
 C10 C9 C8 118.7(14) . . ?
 C8 C9 H9 120.6 . . ?
 C4 C3 C6 122.6(12) . . ?
 C2 C3 C6 122.5(12) . . ?
 C2 C3 C4 114.9(13) . . ?
 N2 C23B H23B 118.1 . . ?
 N2 C23B C4 123.8(13) . . ?
 C4 C23B H23B 118.1 . . ?
 N1 C14 H14 118.7 . . ?
 N1 C14 C15 122.7(12) . . ?
 C15 C14 H14 118.7 . . ?
 N4 C10 C9 124.3(12) . . ?
 N4 C10 C11 115.8(12) . . ?
 C9 C10 C11 119.8(12) . . ?
 Cl2A C23A Cl3A 113(2) . . ?
 Cl2A C23A Cl1A 123(2) . . ?
 Cl2A C23A Cl4A 118.5(19) . . ?
 Cl3A C23A Cl1A 103.5(19) . . ?
 Cl3A C23A Cl4A 97(2) . . ?
 Cl1A C23A Cl4A 97.1(14) . . ?
 N1 C13 H13 117.5 . . ?
 N1 C13 C12 124.9(14) . . ?
 C12 C13 H13 117.5 . . ?
 C14 C15 H15 120.2 . . ?
 C11 C15 C14 119.6(12) . . ?
 C11 C15 H15 120.2 . . ?
 N4 C6 C3 117.0(11) . . ?
 N4 C6 C7 122.9(13) . . ?
 C7 C6 C3 120.0(12) . . ?
 C15 C11 C10 120.3(12) . . ?
 C15 C11 C12 117.4(12) . . ?
 C12 C11 C10 122.3(12) . . ?
 C9 C8 C16 121.9(14) . . ?
 C7 C8 C9 117.0(13) . . ?
 C7 C8 C16 121.1(12) . . ?
 C13 C12 C11 118.5(13) . . ?
 C13 C12 H12 120.7 . . ?
 C11 C12 H12 120.7 . . ?
 C6 C7 H7 120.0 . . ?
 C8 C7 C6 120.0(12) . . ?
 C8 C7 H7 120.0 . . ?
 N2 C1 H1 118.0 . . ?
 N2 C1 C2 124.0(14) . . ?
 C2 C1 H1 118.0 . . ?
 C17 C16 C8 122.6(13) . . ?
 C17 C16 C18 116.7(15) . . ?
 C18 C16 C8 120.7(15) . . ?
 H22A C22A H22B 109.5 . . ?
 H22A C22A H22C 109.5 . . ?
 H22B C22A H22C 109.5 . . ?
 O1A C22A H22A 109.5 . . ?
 O1A C22A H22B 109.5 . . ?
 O1A C22A H22C 109.5 . . ?
 C3 C4 H4 119.8 . . ?
 C23B C4 C3 120.3(13) . . ?
 C23B C4 H4 119.8 . . ?
 C16 C17 H17 124.7 . . ?
 C16 C17 C19A 111(2) . . ?
 C16 C17 C19B 133(2) . . ?
 C19A C17 H17 124.7 . . ?
 C20A O1A C22A 115(3) . . ?
 C16 C18 H18 113.3 . . ?
 C16 C18 C21B 111(2) . . ?
 C21A C18 C16 133(3) . . ?
 C21A C18 H18 113.3 . . ?
 O1A C20A C19A 128(5) . . ?
 O1A C20A C21A 111(4) . . ?
 C19A C20A C21A 120(4) . . ?
 C17 C19A H19A 115.5 . . ?
 C20A C19A C17 129(4) . . ?
 C20A C19A H19A 115.5 . . ?
 C18 C21A C20A 108(4) . . ?
 C18 C21A H21A 125.8 . . ?
 C20A C21A H21A 125.8 . . ?
 C3 C2 H2 119.4 . . ?
 C1 C2 C3 121.3(13) . . ?
 C1 C2 H2 119.4 . . ?
 C0AA Cl3B Cl3B 107.7(12) . 2_655 ?
 Cl2B C0AA Cl1B 106.6(13) . . ?
 Cl4B C0AA Cl2B 109.9(16) . . ?
 Cl4B C0AA Cl1B 106.9(15) . . ?
 Cl4B C0AA Cl3B 113.5(15) . . ?
 Cl3B C0AA Cl2B 112.1(16) . . ?
 Cl3B C0AA Cl1B 107.5(15) . . ?
 C20B O1B C22B 115(3) . . ?
 C17 C19B H19B 124.8 . . ?
 C20B C19B C17 110(3) . . ?
 C20B C19B H19B 124.8 . . ?
 C18 C21B H21B 117.7 . . ?
 C20B C21B C18 125(3) . . ?
 C20B C21B H21B 117.7 . . ?
 C19B C20B O1B 125(4) . . ?
 C21B C20B O1B 112(4) . . ?
 C21B C20B C19B 123(4) . . ?
 O1B C22B H22D 109.5 . . ?
 O1B C22B H22E 109.5 . . ?
 O1B C22B H22F 109.5 . . ?
 H22D C22B H22E 109.5 . . ?
 H22D C22B H22F 109.5 . . ?
 H22E C22B H22F 109.5 . . ?

_shelx_res_file
;
TITL 1p.res in C2/c
    1p.res
    created by SHELXL-2016/6 at 16:19:45 on 12-Mar-2019
CELL 0.71073 24.2816 12.437 17.9609 90 112.1 90
ZERR 8 0.0028 0.0014 0.0021 0 0.004 0
LATT 7
SYMM -X,+Y,0.5-Z
SFAC C H Cl Cu I N O
UNIT 184 127.58 32 8 8 24 8
DFIX 1.5 Cl2A C23A
EADP C23A C6
EADP C0AA C9
EADP C20A C21A
EADP C19B C17
EADP C2 C1
EADP C22A C19A
EADP O1B O1A

L.S. 4
PLAN  10
SIZE 0.56 0.53 0.45
TEMP -164.38
htab
BOND $H
fmap 2
acta
OMIT 4 2 2
REM <olex2.extras>
REM <HklSrc "%.\\1p.hkl">
REM </olex2.extras>

WGHT    0.000000  412.988770
FVAR       0.17933
I001  5    0.456223    1.145761    0.536932    11.00000    0.03282    0.02888 =
         0.02874   -0.00297    0.01499    0.00036
CU02  4    0.499159    0.946894    0.562460    11.00000    0.02086    0.02806 =
         0.01714   -0.00024    0.00355   -0.00451
PART 1
CL2A  3    0.400403    0.434496    0.272088    10.43950    0.13284    0.08524 =
         0.08390    0.00778    0.03207   -0.01449
CL3A  3    0.490149    0.396705    0.412583    10.43950    0.30462    0.20386 =
         0.12544    0.10574    0.12419    0.17671

PART 0
N2    6    0.426672    0.853147    0.543654    11.00000    0.02840    0.02323 =
         0.02630   -0.00061    0.01100    0.00564
N1    6    0.065736    0.551981    0.172529    11.00000    0.01482    0.03663 =
         0.01239    0.00014    0.00028   -0.00321

PART 1
CL1A  3    0.386178    0.487525    0.421583    10.43950    0.12907    0.17320 =
         0.23952   -0.13194    0.12023   -0.06102

PART 0
N4    6    0.246661    0.614145    0.422483    11.00000    0.02279    0.03591 =
         0.01856    0.00014    0.00905    0.00023
C9    1    0.209722    0.448757    0.456181    11.00000    0.02847    0.04076 =
         0.01396   -0.00114   -0.00093    0.00890
AFIX  43
H9    2    0.180336    0.393910    0.440604    11.00000   -1.20000
AFIX   0
C3    1    0.336327    0.696867    0.512034    11.00000    0.01769    0.02911 =
         0.01681   -0.00168    0.00328    0.00521
C23B  1    0.420497    0.793397    0.602695    11.00000    0.03136    0.03444 =
         0.02184   -0.00348    0.00220   -0.00267
AFIX  43
H23B  2    0.448088    0.804120    0.656074    11.00000   -1.20000
AFIX   0
C14   1    0.112026    0.617242    0.192796    11.00000    0.03038    0.02545 =
         0.01809    0.00601   -0.00243   -0.00339
AFIX  43
H14   2    0.113981    0.668239    0.154489    11.00000   -1.20000
AFIX   0
C10   1    0.206308    0.534903    0.405806    11.00000    0.01920    0.03591 =
         0.01768   -0.00872    0.00653    0.00169

PART 1
C23A  1    0.427889    0.471992    0.354791    10.43950    0.02156    0.02640 =
         0.02401    0.00692    0.00179    0.00800

PART 0
C13   1    0.064237    0.482722    0.228164    11.00000    0.01988    0.06138 =
         0.02506    0.01776    0.00510   -0.00335
AFIX  43
H13   2    0.030980    0.435869    0.214375    11.00000   -1.20000
AFIX   0
C15   1    0.158569    0.614269    0.268862    11.00000    0.01579    0.02406 =
         0.02231    0.00743   -0.00136    0.00255
AFIX  43
H15   2    0.191151    0.662462    0.281141    11.00000   -1.20000
AFIX   0
C6    1    0.291498    0.611090    0.494380    11.00000    0.02156    0.02640 =
         0.02401    0.00692    0.00179    0.00800
C11   1    0.156573    0.540947    0.325457    11.00000    0.01645    0.03858 =
         0.01609    0.00444    0.00549    0.00842
C8    1    0.257825    0.443961    0.531327    11.00000    0.03589    0.03171 =
         0.01093   -0.00254    0.00283    0.00884
C12   1    0.107222    0.473806    0.304196    11.00000    0.01931    0.06195 =
         0.02077    0.00910    0.00996   -0.00327
AFIX  43
H12   2    0.103277    0.422928    0.341331    11.00000   -1.20000
AFIX   0
C7    1    0.298616    0.527666    0.549697    11.00000    0.03290    0.02952 =
         0.01358    0.00021    0.00824    0.00698
AFIX  43
H7    2    0.331348    0.528391    0.599758    11.00000   -1.20000
AFIX   0
C1    1    0.385980    0.836133    0.470275    11.00000    0.03006    0.06754 =
         0.02070    0.00067    0.00053   -0.02350
AFIX  43
H1    2    0.388336    0.877686    0.427190    11.00000   -1.20000
AFIX   0
C16   1    0.264315    0.354946    0.588692    11.00000    0.05389    0.02541 =
         0.02030   -0.00975    0.00560    0.00991
PART 1
C22A  1    0.258891    0.078124    0.785511    10.47353    0.03393    0.04442 =
         0.04341    0.02113    0.01904    0.01761
AFIX 137
H22A  2    0.234176    0.043641    0.734879    10.47353   -1.50000
H22B  2    0.234821    0.129613    0.801498    10.47353   -1.50000
H22C  2    0.274630    0.023286    0.827376    10.47353   -1.50000
AFIX   0
PART 0
C4    1    0.376921    0.718482    0.590161    11.00000    0.03585    0.03041 =
         0.02593    0.01034    0.00462   -0.00123
AFIX  43
H4    2    0.374006    0.680713    0.634508    11.00000   -1.20000
AFIX   0
C17   1    0.216401    0.293511    0.588419    11.00000    0.04522    0.04588 =
         0.02459    0.01298    0.02082    0.01963
PART 1
AFIX  43
H17   2    0.177655    0.296096    0.547760    10.47353   -1.20000
AFIX   0
O1A   7    0.306246    0.132337    0.775162    10.47353    0.05378    0.04535 =
         0.03678    0.01330    0.03613    0.01537
PART 0
C18   1    0.320635    0.331136    0.649609    11.00000    0.08251    0.03007 =
         0.03223    0.00140   -0.01723   -0.00717
PART 1
AFIX  43
H18   2    0.351255    0.378666    0.649582    10.47353   -1.20000
AFIX   0
C20A  1    0.289975    0.203797    0.711956    10.47353    0.03642    0.02154 =
         0.02070    0.00853    0.00043    0.00884
C19A  1    0.233263    0.227019    0.656689    10.47353    0.03393    0.04442 =
         0.04341    0.02113    0.01904    0.01761
AFIX  43
H19A  2    0.201525    0.193254    0.666440    10.47353   -1.20000
AFIX   0
C21A  1    0.339529    0.255336    0.707213    10.47353    0.03642    0.02154 =
         0.02070    0.00853    0.00043    0.00884
AFIX  43
H21A  2    0.379818    0.239629    0.739215    10.47353   -1.20000
AFIX   0
PART 0
C2    1    0.341229    0.762790    0.453318    11.00000    0.03006    0.06754 =
         0.02070    0.00067    0.00053   -0.02350
AFIX  43
H2    2    0.312859    0.757062    0.399913    11.00000   -1.20000
AFIX   0

PART 1
CL4A  3    0.468180    0.621953    0.375910    10.43950    0.13793    0.10903 =
         0.12256    0.06669    0.08325    0.05280

PART 0
PART 2
CL2B  3    0.470021    0.368198    0.423476    10.56050    0.09099    0.04432 =
         0.05655   -0.00543    0.01191    0.00513
CL1B  3    0.547044    0.534178    0.402095    10.56050    0.06079    0.05564 =
         0.07548   -0.01438    0.01847    0.00081
CL4B  3    0.425955    0.580091    0.374673    10.56050    0.07422    0.06206 =
         0.09972   -0.00220    0.00914    0.02517
CL3B  3    0.453504    0.445116    0.261894    10.56050    0.11807    0.12141 =
         0.05738   -0.01466    0.00204   -0.00682
C0AA  1    0.470602    0.481279    0.362737    10.56050    0.02847    0.04076 =
         0.01396   -0.00114   -0.00093    0.00890

O1B   7    0.273647    0.114198    0.760309    10.52647    0.05378    0.04535 =
         0.03678    0.01330    0.03613    0.01537
C19B  1    0.211168    0.206870    0.636030    10.52647    0.04522    0.04588 =
         0.02459    0.01298    0.02082    0.01963
AFIX  43
H19B  2    0.176189    0.165349    0.625405    10.52647   -1.20000
AFIX   0
C21B  1    0.313960    0.251575    0.711961    10.52647    0.04854    0.03350 =
         0.02491   -0.01154    0.00419    0.01027
AFIX  43
H21B  2    0.346598    0.244187    0.761729    10.52647   -1.20000
AFIX   0
C20B  1    0.264173    0.190970    0.700347    10.52647    0.04767    0.02603 =
         0.03565   -0.01735    0.02502   -0.00074
C22B  1    0.224860    0.041234    0.748106    10.52647    0.07021    0.05979 =
         0.05523    0.03274    0.03874    0.01304
AFIX 137
H22D  2    0.210753    0.013126    0.693118    10.52647   -1.50000
H22E  2    0.192420    0.079482    0.756598    10.52647   -1.50000
H22F  2    0.238251   -0.018490    0.786309    10.52647   -1.50000
AFIX   0
HKLF 4


REM  1p.res in C2/c
REM R1 =  0.0983 for    4087 Fo > 4sig(Fo)  and  0.1089 for all    4644 data
REM    348 parameters refined using      1 restraints

END

WGHT      0.0000    413.0344

REM Instructions for potential hydrogen bonds
EQIV $5 -x+1/2, y-1/2, -z+1/2
HTAB C14 I001_$5
EQIV $2 x-1/2, -y+3/2, z-1/2
HTAB C13 I001_$2
EQIV $6 -x+1/2, -y+3/2, -z+1
HTAB C12 I001_$6
EQIV $7 x, -y+1, z+1/2
HTAB C7 Cl2A_$7
HTAB C4 Cl2A_$7
HTAB C4 Cl3B_$7
EQIV $8 x, -y+1, z-1/2
HTAB C2 O1A_$8

REM Highest difference peak  2.015,  deepest hole -2.918,  1-sigma level  0.243
Q1    1   0.4311  0.4518  0.3195  11.00000  0.05    2.02
Q2    1   0.4338  0.5611  0.5049  11.00000  0.05    1.58
Q3    1   0.4157  0.9429  0.5104  11.00000  0.05    1.28
Q4    1   0.4518  0.4636  0.4013  11.00000  0.05    1.24
Q5    1   0.5000  1.0000  0.5000  10.50000  0.05    1.22
Q6    1   0.4915  0.5577  0.3642  11.00000  0.05    0.99
Q7    1   0.4834  0.2182  0.4046  11.00000  0.05    0.93
Q8    1   0.4894  0.6624  0.3985  11.00000  0.05    0.91
Q9    1   0.1279  0.4332  0.5314  11.00000  0.05    0.91
Q10   1   0.4694  0.7343  0.5316  11.00000  0.05    0.88
;
_shelx_res_checksum                88413
_shelx_hkl_file
;
   4   0   0 8043.70  469.35
   4   0   0 8134.79  470.05
  -4   0   0 7855.71  469.35
  -4   0   0 8319.27  469.65
  -6   0   0   35.10    4.70
  -6   0   0   27.60    4.60
   6   0   0   30.20    4.50
   6   0   0   40.50    5.40
  -8   0   0  477.95   29.30
   8   0   0  424.46   28.80
   8   0   0  466.55   28.90
   8   0   0  463.05   29.00
  -8   0   0  421.26   29.50
  10   0   0  615.74   39.80
 -10   0   0  632.64   40.10
  10   0   0  660.53   39.80
  10   0   0  590.54   39.60
  12   0   0  489.05   34.20
 -12   0   0  520.45   34.80
  12   0   0  538.35   34.40
  14   0   0   37.90    7.80
  14   0   0   43.70    7.90
 -14   0   0   26.40   10.20
  16   0   0   79.49   14.10
  16   0   0   62.39   10.30
 -16   0   0   50.39   10.10
  18   0   0  969.90   66.19
  18   0   0 1084.19   66.99
  20   0   0 1350.96   86.09
  22   0   0  173.58   22.50
  22   0   0  212.78   24.80
  24   0   0 1304.27   78.69
  24   0   0 1038.00   76.19
  26   0   0  403.36   35.80
  -3  -1   0  605.44   35.20
  -3  -1   0  542.85   34.10
   3  -1   0  572.34   34.70
   3  -1   0  666.23   36.00
   3   1   0  528.75   34.10
   3   1   0  591.44   35.20
  -3   1   0  565.04   34.70
   5  -1   0  682.03   36.80
  -5  -1   0  618.34   36.00
  -5  -1   0  582.94   36.70
   5  -1   0  624.94   37.00
  -5  -1   0  523.25   36.80
  -5   1   0  685.03   36.90
   5   1   0  574.04   35.90
   5   1   0  515.05   36.70
  -7  -1   0  646.34   38.80
   7  -1   0  702.53   39.70
  -7  -1   0  574.34   39.40
   7  -1   0  664.23   40.00
  -7   1   0  700.33   40.90
   7   1   0  554.64   38.60
   9  -1   0  362.76   23.10
   9  -1   0  359.06   23.50
  -9  -1   0  293.67   22.60
  -9  -1   0  325.17   22.00
   9   1   0  313.57   21.90
  -9   1   0  353.96   23.10
 -11  -1   0  346.97   25.20
  11  -1   0  383.06   25.10
  11  -1   0  378.06   25.80
 -11   1   0  381.86   25.50
  11   1   0  301.47   24.90
  11   1   0  352.76   24.20
  13  -1   0  260.77   20.00
  13  -1   0  272.97   20.50
  13  -1   0  283.37   21.80
 -13  -1   0  230.98   20.40
  13   1   0  239.48   19.60
 -13   1   0  254.97   20.50
  15  -1   0  247.18   20.70
  15  -1   0  245.38   22.60
  15  -1   0  272.57   21.90
 -15  -1   0  238.38   21.70
  15   1   0  236.48   21.60
 -15   1   0  248.08   21.10
  15   1   0  252.97   20.60
  17  -1   0  394.96   36.40
  17  -1   0  434.06   31.70
 -17   1   0  426.26   37.50
  17   1   0  404.16   32.40
  17   1   0  440.96   31.50
  19  -1   0 1055.49   63.09
  19  -1   0  784.32   60.19
  19   1   0  821.72   65.59
  19   1   0 1058.99   61.49
  21  -1   0  464.35   39.30
  21   1   0  494.75   38.60
  21   1   0  520.75   39.50
  23  -1   0  441.26   38.40
  23   1   0  437.36   36.80
  23   1   0  452.95   37.50
  25  -1   0  302.67   32.10
  25   1   0  253.77   29.40
  25   1   0  294.87   30.10
  27  -1   0  168.58   28.50
  27   1   0  209.08   26.30
  27   1   0  154.48   25.30
   0  -2   0 3762.52  220.48
   0  -2   0 3814.82  220.78
   0   2   0 3822.92  220.98
   0   2   0 3754.42  220.58
   2  -2   0 2573.34  144.59
   2  -2   0 2279.87  144.29
   2  -2   0 2440.86  144.39
  -2  -2   0 2474.05  144.39
  -2  -2   0 2454.05  145.19
   2   2   0 2648.14  145.19
  -2   2   0 2480.65  144.69
  -2   2   0 2393.56  144.29
   2   2   0 2518.55  144.39
   4  -2   0 1649.83   94.09
   4  -2   0 1604.84   94.09
   4  -2   0 1447.06   94.39
  -4  -2   0 1671.23   94.99
   4   2   0 1599.24   94.69
  -4   2   0 1588.74   93.79
  -6  -2   0  382.76   26.20
   6  -2   0  409.36   25.80
  -6  -2   0  392.16   23.70
   6  -2   0  362.96   24.90
   6  -2   0  419.16   25.10
   6   2   0  379.66   25.70
   6   2   0  361.66   23.70
  -6   2   0  406.66   25.00
  -8  -2   0  617.34   40.10
   8  -2   0  562.54   38.80
  -8  -2   0  684.43   39.80
  -8  -2   0  588.04   37.70
   8  -2   0  632.34   40.00
   8   2   0  671.53   40.10
  -8   2   0  602.64   39.10
  10  -2   0  972.60   58.19
 -10  -2   0  959.80   57.69
 -10  -2   0  864.61   55.59
  10  -2   0  919.21   57.09
  10   2   0  885.91   55.69
 -10   2   0  949.31   57.49
  10   2   0  909.21   57.69
 -12  -2   0  357.86   26.60
  12  -2   0  368.06   26.20
  12  -2   0  403.76   27.90
 -12   2   0  395.86   26.80
  12   2   0  345.27   24.90
  12   2   0  352.66   27.00
 -14  -2   0  885.41   62.49
  14  -2   0 1033.50   62.39
  14  -2   0 1085.19   63.99
  14   2   0  868.61   60.49
 -14   2   0 1053.69   63.09
  16  -2   0  526.55   35.60
  16  -2   0  506.85   34.60
 -16   2   0  525.55   36.00
  16   2   0  475.05   33.90
  16   2   0  442.16   35.80
  18  -2   0  244.18   25.30
  18  -2   0  227.38   21.70
  18   2   0  207.38   20.70
  20  -2   0  222.48   24.00
  20  -2   0  278.27   28.30
  20   2   0  284.87   24.20
  20   2   0  270.17   26.10
  22  -2   0   86.49   18.10
  22   2   0   57.59   14.60
  24  -2   0   65.29   15.60
  24  -2   0   31.50   10.90
  24   2   0   47.50   14.40
  24   2   0   56.99   13.10
  26  -2   0   18.80   14.90
  26  -2   0  -13.30    9.30
  26   2   0   20.60   12.50
  26   2   0    2.70   11.30
   1  -3   0 2090.59  124.79
  -1  -3   0 2186.28  125.69
   1  -3   0 2239.98  125.09
   1  -3   0 2115.69  125.09
  -1  -3   0 2085.49  124.99
   1   3   0 2116.19  124.89
  -1   3   0 2035.50  124.99
   1   3   0 2214.38  125.69
  -1   3   0 2057.69  125.29
   3  -3   0  352.06   21.70
  -3  -3   0  314.97   21.90
   3  -3   0  347.07   21.60
   3  -3   0  297.77   22.10
   3   3   0  327.87   21.60
   3   3   0  367.76   23.10
  -3   3   0  360.86   21.40
  -3   3   0  342.37   22.20
  -5  -3   0  723.23   52.19
   5  -3   0  834.72   52.09
   5  -3   0  845.82   51.39
   5  -3   0  916.21   51.29
   5   3   0  952.30   51.19
   5   3   0  797.92   52.09
  -5   3   0  834.22   50.89
   7  -3   0 3140.69  163.98
   7  -3   0 2815.02  164.58
   7  -3   0 2905.11  163.78
  -7  -3   0 2450.65  164.58
   7   3   0 2537.35  164.18
  -7   3   0 2810.42  163.38
   9  -3   0 2493.25  146.19
   9  -3   0 2761.12  145.39
  -9   3   0 2452.65  144.89
   9   3   0 2071.39  145.19
  11  -3   0 3157.78  179.58
 -11  -3   0 2999.30  180.18
  11  -3   0 3197.98  181.08
  11  -3   0 3312.07  179.88
 -11  -3   0 2556.34  180.18
  11   3   0 2919.51  177.38
 -11   3   0 3146.29  179.68
  11   3   0 2953.50  180.28
 -13  -3   0 2033.40  127.19
  13  -3   0 2307.57  128.49
  13  -3   0 2060.09  126.09
  13  -3   0 2147.59  126.49
 -13   3   0 2127.99  126.69
  13   3   0 2020.40  127.19
  13   3   0 2010.30  124.29
  15  -3   0  719.73   50.59
  15  -3   0  845.12   53.89
  15  -3   0  754.12   50.49
  15   3   0  752.12   48.90
  15   3   0  758.02   52.79
 -15   3   0  858.01   53.59
  17  -3   0   53.19   10.30
 -17   3   0   93.29   14.30
  17   3   0   66.79   12.30
  17   3   0   64.19   12.20
  19  -3   0   17.10    9.30
  19  -3   0    9.30    8.00
  19  -3   0   11.40   11.70
  19   3   0   19.80    8.20
  19   3   0    1.90    8.70
  21  -3   0  221.08   27.50
  21  -3   0  211.28   21.60
  21   3   0  163.88   23.40
  21   3   0  219.78   21.00
  23  -3   0  178.28   29.60
  23  -3   0  153.68   26.50
  23   3   0  149.99   19.50
  25  -3   0   84.59   19.00
  25  -3   0   54.09   12.80
  25   3   0   86.79   16.90
  25   3   0   79.69   15.20
   0  -4   0 2956.40  163.08
   0  -4   0 2834.02  162.18
   0   4   0 2696.23  161.98
   0   4   0 2540.45  162.48
   2  -4   0 2220.48  117.19
   2  -4   0 1874.01  115.19
   2  -4   0 2098.99  115.89
  -2  -4   0 2154.48  117.09
  -2  -4   0 1791.12  116.49
  -2   4   0 1878.71  115.79
  -2   4   0 1955.50  114.99
  -2   4   0 1904.01  115.99
   2   4   0 1802.42  115.19
   2   4   0 1859.51  116.29
   4  -4   0 1376.16   81.19
   4  -4   0 1363.36   81.09
   4  -4   0 1213.88   81.79
  -4  -4   0 1501.55   83.39
   4  -4   0 1466.15   81.69
  -4  -4   0 1329.37   81.39
   4   4   0 1271.07   80.89
  -4   4   0 1363.86   80.79
   4   4   0 1414.06   82.59
  -4   4   0 1290.37   81.69
   6  -4   0  254.57   18.00
   6  -4   0  247.08   17.50
   6  -4   0  226.68   18.80
  -6  -4   0  257.47   20.30
   6   4   0  252.87   19.50
   6   4   0  247.38   17.50
  -6   4   0  242.28   17.10
   8  -4   0  688.53   46.80
   8  -4   0  699.23   45.60
   8  -4   0  698.23   45.50
   8   4   0  837.62   47.60
  -8   4   0  748.13   45.30
   8   4   0  664.63   45.00
 -10  -4   0 1893.81  113.89
  10  -4   0 1860.41  111.49
  10  -4   0 1803.22  112.89
  10  -4   0 1874.61  111.59
  10   4   0 1888.81  112.79
 -10   4   0 1801.62  111.19
 -12  -4   0 1093.99   68.49
  12  -4   0 1208.78   70.89
 -12  -4   0  907.21   69.29
  12  -4   0 1116.79   67.59
  12  -4   0 1097.69   69.49
  12   4   0 1075.29   68.69
 -12   4   0 1060.99   67.19
  14  -4   0 1393.46   83.09
  14  -4   0 1217.88   79.99
  14  -4   0 1272.87   80.39
 -14  -4   0 1174.18   83.29
 -14   4   0 1288.07   80.59
  14   4   0 1419.36   88.59
  16  -4   0  162.68   17.80
  16  -4   0  158.58   21.00
  16   4   0  147.59   13.40
 -16   4   0  126.39   16.70
  16   4   0  114.39   18.50
  18  -4   0   62.09   14.50
  18  -4   0   43.60   10.40
  18   4   0   18.60   10.10
  18   4   0   34.60    7.30
  20  -4   0   94.99   17.80
  20   4   0  151.88   21.60
  20   4   0  124.39   15.10
  22  -4   0  176.78   29.60
  22   4   0  232.48   27.10
  22   4   0  220.38   20.20
  24  -4   0   81.99   23.00
  24   4   0  152.48   24.70
  24   4   0  140.79   17.30
  26  -4   0   13.20   17.70
  26  -4   0   13.10   10.40
  26   4   0   32.90   10.30
  26   4   0   54.09   17.30
  -1  -5   0   17.20    5.30
   1  -5   0   21.30    4.40
  -1  -5   0   11.70    4.20
   1  -5   0   17.20    4.50
   1  -5   0   13.40    4.50
  -1   5   0   13.20    5.20
  -1   5   0   25.10    5.30
   1   5   0   12.50    5.40
   1   5   0    9.60    4.20
   3  -5   0  182.38   15.50
   3  -5   0  218.38   16.20
   3  -5   0  215.58   15.00
   3  -5   0  168.18   15.00
  -3  -5   0  203.38   17.50
  -3  -5   0  223.88   16.10
   3   5   0  203.28   17.30
   3   5   0  205.68   15.40
  -3   5   0  189.88   15.90
  -3   5   0  229.48   14.60
  -5  -5   0   10.50    5.90
  -5  -5   0   12.40    5.80
   5  -5   0    3.00    4.30
   5  -5   0   14.60    3.90
   5  -5   0   10.20    3.50
   5  -5   0    7.40    4.60
  -5   5   0   13.80    3.50
  -5   5   0    7.00    5.20
   5   5   0   22.20    4.80
   5   5   0   15.50    5.90
   7  -5   0  458.65   28.50
   7  -5   0  445.06   29.00
   7  -5   0  430.06   29.40
   7  -5   0  391.16   30.20
  -7   5   0  457.55   28.50
   7   5   0  399.86   28.50
   7   5   0  439.86   31.10
   9  -5   0   96.09   13.20
   9  -5   0  119.09   11.90
   9  -5   0  102.59   11.50
  -9  -5   0  114.29   15.20
   9   5   0  110.59   14.20
   9   5   0  107.19   11.70
  -9   5   0  107.29   10.90
  11  -5   0   83.99   11.00
 -11  -5   0   80.99   15.60
  11  -5   0   75.29   11.10
  11  -5   0  130.19   21.20
 -11   5   0   73.19   10.20
  11   5   0   82.69   11.40
  11   5   0   80.29   14.00
  13  -5   0  347.67   27.70
  13  -5   0  295.67   23.90
 -13  -5   0  330.47   28.20
  13  -5   0  278.67   24.40
 -13   5   0  314.77   24.30
  13   5   0  281.47   24.00
  13   5   0  328.67   26.70
  15  -5   0  162.88   21.00
  15  -5   0  137.79   17.40
  15   5   0  144.99   19.80
 -15   5   0  151.48   17.00
  17  -5   0   54.59   11.70
  17  -5   0   64.99   13.90
 -17   5   0   27.40   10.80
  17   5   0   38.90   11.00
  19  -5   0   45.70   15.30
  19  -5   0   21.90    9.90
  19   5   0   49.30   13.20
  21  -5   0   95.79   19.70
  21  -5   0   57.29   11.90
  23  -5   0  146.89   19.90
  23   5   0  210.68   26.40
  25  -5   0  101.19   22.20
  25   5   0  122.79   26.00
   0  -6   0  395.96   25.60
   0  -6   0  356.06   24.50
   0  -6   0  330.87   25.80
   0   6   0  359.36   26.80
   0   6   0  374.76   25.40
   2  -6   0  356.26   25.40
   2  -6   0  355.86   25.70
   2  -6   0  339.77   24.30
  -2  -6   0  428.06   26.10
  -2  -6   0  365.76   27.10
   2  -6   0  341.97   25.20
   2   6   0  398.66   25.40
  -2   6   0  354.26   25.70
   2   6   0  359.76   26.90
  -2   6   0  325.17   26.40
  -4  -6   0    7.40    6.00
   4  -6   0   -5.00    4.50
   4  -6   0    6.90    3.80
  -4  -6   0    9.30    5.90
   4  -6   0    8.60    5.20
  -4   6   0    5.10    3.30
   4   6   0    8.80    4.80
   4   6   0   -2.20    5.20
  -4   6   0   -5.50    5.30
  -6  -6   0  130.59   16.80
   6  -6   0  150.38   13.20
   6  -6   0  159.08   15.40
  -6  -6   0  137.69   15.20
   6  -6   0  158.48   13.30
   6  -6   0  133.39   14.00
  -6   6   0  127.79   15.00
  -6   6   0  143.29   12.30
   6   6   0  164.68   16.50
   6   6   0  173.78   13.80
   8  -6   0  801.42   54.79
   8  -6   0 1008.80   61.49
   8  -6   0  918.51   56.09
  -8  -6   0  986.00   71.49
   8  -6   0  816.52   57.39
   8   6   0  915.51   55.39
  -8   6   0  810.32   54.89
   8   6   0  917.61   57.99
  10  -6   0  890.91   56.49
  10  -6   0  929.91   54.19
 -10  -6   0  748.73   56.39
  10  -6   0  774.02   53.29
  10  -6   0  730.93   51.79
  10   6   0  922.81   52.99
  10   6   0  917.61   57.19
 -10   6   0  795.62   52.59
  12  -6   0 1599.04  103.19
 -12  -6   0 1805.32  112.19
  12  -6   0 1585.14  100.79
 -12   6   0 1623.64  100.19
  12   6   0 1618.14   99.89
  12   6   0 1667.03  102.69
  14  -6   0  753.52   52.99
  14  -6   0  809.82   56.39
  14   6   0  849.61   55.39
  14   6   0  795.92   52.29
  16  -6   0  131.59   18.00
  16  -6   0  168.98   23.60
 -16   6   0  149.88   18.80
  16   6   0  147.59   18.50
  16   6   0  173.28   21.60
  18  -6   0   15.20    9.80
  18  -6   0    2.50   13.80
  18   6   0   21.70   10.70
  18   6   0   12.00   10.30
  20  -6   0   18.10   10.80
  20  -6   0  -12.20   14.10
  20   6   0   44.20   12.00
  20   6   0    6.90   11.10
  22  -6   0  106.79   25.00
  22  -6   0   94.89   16.80
  22   6   0  115.29   19.10
  24  -6   0    6.10    8.30
  24  -6   0  -10.90   16.70
  24   6   0   -3.80   13.00
  24   6   0   -1.30   11.80
  -1  -7   0  828.42   54.19
   1  -7   0  837.32   55.29
  -1  -7   0  887.91   55.29
   1  -7   0  897.51   55.29
  -1  -7   0  879.21   56.29
   1  -7   0  844.22   54.69
   1  -7   0  852.71   54.39
  -1   7   0  880.81   55.39
  -1   7   0  893.41   56.59
   1   7   0  900.91   54.99
   1   7   0  872.01   56.59
  -3  -7   0   54.69    9.00
   3  -7   0   61.79    7.90
   3  -7   0   61.59    9.40
  -3  -7   0   35.70    7.40
   3  -7   0   51.79    9.40
   3  -7   0   40.60    7.80
   3   7   0   45.00    7.70
   3   7   0   44.40    9.10
  -3   7   0   53.19    8.60
   5  -7   0  678.43   44.30
  -5  -7   0  702.33   45.60
   5  -7   0  693.53   44.40
  -5  -7   0  661.53   56.69
   5  -7   0  657.53   45.70
  -5   7   0  695.13   45.90
  -5   7   0  679.93   43.50
   5   7   0  709.13   46.80
   5   7   0  734.33   44.60
   7  -7   0  736.53   55.19
  -7  -7   0  801.32   55.69
   7  -7   0  825.42   51.39
   7  -7   0  813.92   52.39
   7  -7   0  855.01   52.19
   7   7   0  778.62   57.49
  -7   7   0  831.22   51.09
   7   7   0  848.62   51.69
  -9  -7   0 1793.12  115.79
   9  -7   0 1762.02  111.69
   9  -7   0 1908.01  111.79
   9  -7   0 1895.41  110.49
   9  -7   0 1737.93  113.39
   9   7   0 1909.41  113.89
  -9   7   0 1858.71  110.59
   9   7   0 1828.82  110.69
  11  -7   0 1587.94  101.79
  11  -7   0 1515.25   97.29
  11  -7   0 1622.44   99.49
 -11   7   0 1560.74   97.89
  11   7   0 1693.03   98.19
  11   7   0 1688.43  101.39
  13  -7   0 1225.08   80.99
  13  -7   0 1264.17   78.89
  13  -7   0 1246.08   83.99
  13   7   0 1288.97   79.69
 -13   7   0 1298.77   82.99
  13   7   0 1392.96   83.59
  15  -7   0  479.25   39.60
  15  -7   0  407.16   34.30
  15  -7   0  472.75   32.50
 -15   7   0  472.45   33.90
  15   7   0  477.95   37.60
  15   7   0  451.65   33.70
  17  -7   0   12.40   13.20
  17  -7   0   23.20   10.20
  17   7   0   20.20   10.10
  17   7   0   31.30   11.70
  19  -7   0  -23.90   13.50
  19  -7   0   -5.20    9.10
  19   7   0  -12.90    9.20
  19   7   0  -15.40   10.60
  21  -7   0   17.00   12.10
  21  -7   0    7.10   15.20
  21   7   0   -1.10   13.50
  21   7   0   64.39   17.80
  23  -7   0   18.90   16.20
  23  -7   0    3.00   11.40
  23   7   0   25.90   14.30
  23   7   0   20.70   11.50
   0  -8   0    8.80    5.10
   0  -8   0    8.90    4.20
   0  -8   0   13.60    6.20
   0  -8   0    6.50    5.50
   0   8   0    4.60    6.80
   0   8   0    5.90    6.00
  -2  -8   0   42.40    9.20
   2  -8   0   45.00    8.20
   2  -8   0   34.50    7.50
   2  -8   0   36.70    7.60
   2  -8   0   45.60    7.90
  -2  -8   0   40.20    8.20
  -2  -8   0   47.10    7.10
   2   8   0   41.10    8.10
  -2   8   0   37.00    8.30
  -2   8   0   31.20    8.10
   2   8   0   38.10    9.30
   4  -8   0   58.99   10.20
   4  -8   0   62.19   10.60
  -4  -8   0   36.10    9.50
  -4  -8   0   56.19   10.30
   4  -8   0   57.79   10.20
   4  -8   0   53.49    9.00
   4   8   0   50.59    9.00
  -4   8   0   49.50    9.90
   4   8   0   65.29   11.50
   6  -8   0  178.68   16.40
   6  -8   0  148.89   16.20
   6  -8   0  195.08   19.70
  -6  -8   0  124.39   19.40
  -6  -8   0  192.88   19.20
   6  -8   0  163.98   16.00
   6   8   0  177.38   16.90
   6   8   0  176.98   20.20
  -6   8   0  176.28   18.20
   8  -8   0  510.65   33.00
   8  -8   0  438.46   35.90
   8  -8   0  443.56   33.60
  -8   8   0  408.16   31.80
   8   8   0  529.45   33.60
   8   8   0  497.25   36.80
  10  -8   0 1201.88   71.19
  10  -8   0 1130.09   72.39
  10  -8   0 1022.10   74.69
  10   8   0 1120.09   71.29
 -10   8   0 1145.79   71.19
  10   8   0 1224.58   75.29
  12  -8   0 1189.78   85.19
  12  -8   0 1299.77   82.49
  12  -8   0 1440.36   80.69
  12   8   0 1235.38   80.69
  12   8   0 1340.27   84.99
  14  -8   0  838.42   65.49
  14  -8   0 1062.79   59.89
  14  -8   0  775.02   61.59
 -14   8   0 1073.39   61.29
  14   8   0  964.40   64.89
  14   8   0  899.71   60.29
  16  -8   0  233.08   23.50
  16  -8   0  248.58   29.40
  16   8   0  252.87   22.60
  16   8   0  237.28   27.70
  18  -8   0   64.49   18.40
  18  -8   0   56.39   12.60
  18   8   0   96.29   15.90
  18   8   0   48.30   14.20
  20  -8   0   -8.20   15.10
  20  -8   0  -13.40   10.50
  20  -8   0   20.90    8.00
  20   8   0    3.90   15.80
  20   8   0    0.10   14.00
  22  -8   0   17.90   17.50
  22   8   0    7.90   13.80
  22   8   0   40.90   11.50
  -1  -9   0 1044.30   69.29
  -1  -9   0 1078.49   68.19
   1  -9   0 1125.99   68.99
   1  -9   0 1078.39   68.49
   1  -9   0 1067.39   69.89
  -1  -9   0 1032.00   68.39
  -1  -9   0 1102.39   70.79
   1  -9   0 1147.39   69.69
   1   9   0 1082.39   71.09
  -1   9   0 1181.08   69.89
   1   9   0 1079.59   74.29
  -1   9   0  989.80   78.49
  -3  -9   0 1000.90   67.39
   3  -9   0 1083.59   68.59
   3  -9   0 1226.88   71.69
  -3  -9   0 1020.20   69.69
  -3  -9   0 1152.58   77.39
   3  -9   0 1030.80   69.59
   3  -9   0 1183.58   72.09
  -3   9   0 1026.70   69.69
   3   9   0 1107.19   69.29
   3   9   0 1049.99   71.09
   5  -9   0  693.93   52.39
   5  -9   0  706.33   45.80
  -5  -9   0  575.94   42.00
  -5  -9   0  610.84   54.09
   5  -9   0  712.53   44.30
   5   9   0  669.23   47.00
  -5   9   0  633.54   45.60
   5   9   0  592.64   43.70
   7  -9   0  275.47   21.80
  -7  -9   0  198.58   18.10
   7  -9   0  245.88   21.20
  -7  -9   0  291.37   28.80
   7  -9   0  236.88   24.10
   7   9   0  210.28   21.30
   7   9   0  215.58   24.20
   9  -9   0  153.68   21.30
   9  -9   0  155.68   17.80
   9  -9   0  181.68   17.00
  -9   9   0  176.08   16.20
   9   9   0  129.49   20.80
   9   9   0  127.79   17.00
  11  -9   0   40.40    9.50
  11  -9   0   20.80   11.20
  11   9   0   27.60   11.00
 -11   9   0   57.19   12.90
  11   9   0   31.50    9.50
  13  -9   0   34.00    9.90
  13  -9   0   16.20   11.40
  13   9   0   28.20   12.00
  13   9   0   23.20    8.90
 -13   9   0   36.70    8.60
  15  -9   0  198.58   18.00
  15  -9   0  189.08   20.60
  15  -9   0  178.88   26.30
  15   9   0  158.58   19.80
  15   9   0  149.69   25.10
  17  -9   0   81.39   25.90
  17  -9   0   46.50   11.80
  17   9   0   50.29   17.10
  19  -9   0  185.18   24.10
  19  -9   0  264.47   32.20
  19  -9   0  222.08   20.20
  19   9   0  211.68   28.30
  19   9   0  199.68   21.70
  21  -9   0   67.49   16.80
  21  -9   0   64.39   20.20
  21   9   0   97.09   16.60
  21   9   0   74.69   16.80
   0 -10   0 3028.70  181.48
   0 -10   0 2936.71  180.38
   0  10   0 3141.59  181.58
   0  10   0 2948.51  183.18
   2 -10   0 1966.00  119.09
  -2 -10   0 1912.61  118.19
   2 -10   0 1848.81  123.69
  -2 -10   0 2057.79  120.29
  -2 -10   0 1889.61  123.29
   2 -10   0 2067.79  121.09
   2  10   0 1920.71  121.89
   2  10   0 1920.61  119.39
  -2  10   0 1946.21  120.39
   4 -10   0  765.32   54.69
  -4 -10   0  758.32   52.39
   4 -10   0  851.41   55.99
   4 -10   0  807.42   54.09
  -4 -10   0  805.12   56.09
   4  10   0  914.51   58.39
  -4  10   0  823.32   56.09
   4  10   0  838.92   54.39
   6 -10   0  126.89   19.00
  -6 -10   0  110.99   13.10
   6 -10   0  104.19   16.00
  -6 -10   0  129.99   19.30
   6 -10   0  110.19   15.40
   6  10   0  120.69   16.20
  -6  10   0   92.39   15.80
   6  10   0  110.39   17.00
   8 -10   0   13.20    7.30
   8 -10   0   23.10   11.10
   8 -10   0   11.50    7.60
   8  10   0   17.00    8.60
   8  10   0    6.40    9.60
  10 -10   0  146.59   21.00
  10 -10   0  144.49   26.00
  10 -10   0  136.69   16.00
 -10  10   0  126.09   15.00
  10  10   0  127.09   16.70
  12 -10   0   95.09   14.20
  12 -10   0   91.89   15.80
  12 -10   0   75.09   14.80
  12  10   0   67.99   12.00
  12  10   0   55.49   13.90
 -12  10   0   75.29   13.70
  14 -10   0   21.20    9.50
  14 -10   0   27.40   12.60
  14 -10   0   36.60    8.70
  14  10   0   20.40    9.70
  14  10   0   30.80   12.90
  16 -10   0   12.70   10.20
  16 -10   0   18.00   14.20
  16 -10   0   33.80    9.90
  16  10   0   28.40   13.20
  16  10   0   35.40   10.80
  18 -10   0   43.70   13.60
  18 -10   0   68.69   18.00
  18 -10   0   98.19   18.60
  18  10   0   67.89   14.90
  18  10   0   61.19   12.60
  20 -10   0  228.08   28.70
  20 -10   0  322.17   37.80
  20  10   0  357.76   35.10
  20  10   0  272.17   25.70
   1 -11   0 1086.29   70.09
  -1 -11   0 1029.10   69.09
   1 -11   0 1057.49   68.99
  -1 -11   0 1036.60   72.49
  -1  11   0 1107.79   70.89
  -1  11   0 1081.29   72.89
   1  11   0 1039.80   72.79
   1  11   0 1128.39   70.49
   3 -11   0  493.35   34.80
   3 -11   0  464.65   35.50
  -3 -11   0  394.96   33.80
  -3 -11   0  445.26   33.40
   3  11   0  480.25   35.00
   3  11   0  387.56   37.10
  -3  11   0  449.16   36.10
   5 -11   0  270.77   26.90
  -5 -11   0  270.17   22.70
   5 -11   0  274.77   27.00
  -5  11   0  250.77   26.40
   5  11   0  249.18   28.40
   5  11   0  296.77   24.80
   7 -11   0    5.10   10.80
  -7 -11   0   11.80    6.50
   7 -11   0   14.60    8.10
   7  11   0   14.30    8.70
   7  11   0   -1.60    9.90
   9 -11   0   39.50   12.30
   9 -11   0   29.70    9.60
   9  11   0   48.80   10.50
   9  11   0   30.80   11.90
  11 -11   0   34.20   14.00
  11 -11   0   25.70   10.50
  11 -11   0   26.60    9.70
  11  11   0   32.00   12.40
  11  11   0   38.80   10.60
  13 -11   0   17.50   10.80
  13 -11   0   31.90   18.40
  13 -11   0    1.30    7.90
  13  11   0   15.10   14.70
  13  11   0   28.90   10.30
  15 -11   0   27.90   15.50
  15 -11   0   43.30   10.20
  15 -11   0   61.99   13.10
  15  11   0   55.19   15.20
  15  11   0   63.29   12.80
  17 -11   0    4.20   11.90
  17 -11   0   22.00   16.50
  17  11   0   34.20   14.20
  17  11   0   34.50   11.30
   0 -12   0  648.64   44.40
   0 -12   0  596.24   43.70
   0  12   0  647.04   45.70
   0  12   0  576.64   47.50
   2 -12   0   40.70   10.00
   2 -12   0   43.30   11.60
  -2 -12   0   32.70   11.00
  -2 -12   0   28.80   10.50
   2  12   0   31.20   11.30
  -2  12   0   45.10   12.50
   2  12   0   27.50   12.40
  -4 -12   0  122.59   18.30
  -4 -12   0  167.38   18.80
   4 -12   0  123.49   21.20
   4 -12   0  150.58   17.90
   4  12   0  139.09   20.20
   4  12   0  140.39   23.60
  -4  12   0  180.58   22.20
   6 -12   0   28.30    9.10
  -6 -12   0    4.80    8.40
   6 -12   0   26.20   13.00
   6  12   0   28.10   10.90
   6  12   0   15.60   11.20
   8 -12   0   14.50   12.80
   8 -12   0   37.90   10.10
   8  12   0   20.00   10.60
   8  12   0   22.50   12.00
  10 -12   0   13.80   14.30
  10 -12   0   14.30   10.00
  10  12   0   41.80   14.30
  10  12   0   38.10   11.40
  12  12   0   13.50   10.30
  12  12   0    9.70   13.10
  14 -12   0   38.30   12.80
  14 -12   0   35.70   17.80
  14  12   0   67.39   17.90
  14  12   0   55.09   12.70
  16 -12   0   -8.10   15.10
  16 -12   0  -14.40   11.30
  16  12   0    9.20   13.80
  16  12   0    9.40   10.10
  -1 -13   0  139.69   18.40
   1 -13   0  114.39   20.90
  -1 -13   0  106.59   19.20
  -1  13   0  143.99   21.50
   1  13   0  154.18   20.90
   1  13   0   97.29   18.10
   3 -13   0  159.68   18.90
   3 -13   0  161.18   22.00
  -3 -13   0  129.09   19.50
  -3 -13   0  153.78   19.80
  -3  13   0  140.99   21.60
   3  13   0  166.48   21.30
   3  13   0  100.79   19.00
   5 -13   0   -6.70   11.40
  -5 -13   0   -3.20    8.60
   5 -13   0   -3.20    7.90
   5  13   0   -8.30   10.90
   5  13   0   -9.80   14.20
   7 -13   0   47.60   16.70
  -7 -13   0  106.79   17.90
   7 -13   0   54.59   11.70
   7  13   0   64.29   16.90
   7  13   0   66.39   15.10
   9 -13   0  345.17   30.70
   9  13   0  328.37   30.70
   9  13   0  391.06   37.90
  11 -13   0  266.07   34.50
  11 -13   0  298.37   28.20
  11  13   0  309.37   34.70
  11  13   0  272.77   27.40
  13 -13   0  345.17   33.10
  13 -13   0  330.17   39.90
  13  13   0  409.86   39.00
  13  13   0  350.36   30.40
   0 -14   0  186.88   22.60
   0 -14   0  153.48   24.20
   0  14   0  211.58   29.20
  -2 -14   0  300.57   28.90
   2 -14   0  357.16   29.50
  -2 -14   0  263.17   28.60
   2 -14   0  271.97   31.20
   2  14   0  329.17   30.60
   2  14   0  305.77   34.50
  -2  14   0  296.47   32.70
  -4 -14   0   33.10   12.60
  -4 -14   0   46.30   13.30
   4 -14   0   49.40   12.60
   4 -14   0   30.80   15.60
   4  14   0   54.89   14.80
   6 -14   0   12.40   10.40
  -6 -14   0   20.50   11.80
   6 -14   0   31.50   17.10
  -6 -14   0   -1.00   10.30
   6  14   0   32.40   13.00
   6  14   0   16.20   13.70
  -8 -14   0   77.59   23.90
   8 -14   0   42.00   12.70
   8 -14   0   10.60   17.10
   8  14   0   41.80   14.70
   8  14   0   41.20   14.20
   1 -15   0   63.29   14.50
  26   0  -1   26.80   12.10
  26   0  -1   15.80   14.10
  24   0  -1   41.00   14.20
  24   0  -1   34.40   11.60
  22   0  -1   49.70   12.90
  22   0  -1   84.69   14.20
  20   0  -1   10.70   11.20
  20   0  -1   -5.20    8.80
  18   0  -1  283.47   27.90
  18   0  -1  388.66   28.00
  16   0  -1   20.50    7.60
 -16   0   1   11.00    7.20
  16   0  -1    8.00    6.90
  14   0  -1   93.19   11.50
  14   0  -1   63.99   11.30
 -14   0   1   59.69   10.30
  14   0  -1   78.19   11.80
  12   0  -1   35.30    6.90
  12   0  -1   43.70    7.50
  12   0  -1   53.99    8.60
 -12   0   1   36.50    7.10
  10   0  -1   67.59    7.60
  10   0  -1   51.59    7.90
 -10   0   1   53.29    7.90
   8   0  -1    1.10    2.40
  -8   0   1    1.00    2.60
   8   0  -1   -1.60    2.50
   6   0  -1  237.98   15.00
   6   0  -1  217.48   15.20
  -6   0   1  215.88   15.30
  -4   0   1    3.40    1.50
  -2   0  -1   24.70    2.70
  -2   0  -1   23.00    2.20
   2   0   1   23.40    2.30
   2   0   1   29.10    3.90
  -4   0  -1  437.96   26.10
   4   0   1  430.06   26.90
  -4   0  -1  423.66   25.80
   4   0   1  430.26   25.70
  -4   0  -1  379.06   25.50
  -6   0  -1   32.20    4.90
   6   0   1   33.00    5.70
   6   0   1   18.40    3.50
  -6   0  -1   24.80    4.40
   8   0   1   75.39    8.30
   8   0   1   89.29    9.20
  -8   0  -1   80.89    8.60
  -8   0  -1   92.59    8.30
  10   0   1   22.00    4.90
 -10   0  -1   14.00    4.80
 -10   0  -1   12.90    4.30
  10   0   1   24.20    5.60
  12   0   1    5.70    4.40
 -12   0  -1    1.60    3.80
  12   0   1    3.50    5.10
 -12   0  -1    0.30    4.40
  14   0   1   45.00    9.10
 -14   0  -1   46.00   15.30
  14   0   1   35.40    7.60
  16   0   1  247.18   22.70
 -16   0  -1  261.37   23.70
  16   0   1  309.07   24.60
  18   0   1  349.47   28.80
  20   0   1  115.09   20.20
  20   0   1  151.78   21.20
  22   0   1  -11.80   11.20
  24   0   1    4.60   10.90
  24   0   1    5.90   13.20
  26   0   1   13.30   14.30
  26   0   1    1.90   11.50
  27  -1  -1   55.69   14.50
  27  -1  -1   71.29   17.10
  27   1  -1   41.80   14.20
  25  -1  -1  125.29   19.80
  25  -1  -1  109.29   21.00
  25   1  -1   76.39   16.00
  23  -1  -1   91.09   18.60
  23  -1  -1   94.29   16.00
  23   1  -1   48.20   13.70
  23   1  -1   73.49   14.50
  21  -1  -1   33.80   10.30
  21   1  -1   41.80   13.40
  19  -1  -1  600.04   44.30
  19  -1  -1  700.73   45.50
  19   1  -1  585.64   42.90
  17  -1  -1  943.91   62.69
  17  -1  -1  965.60   62.89
  17  -1  -1 1077.59   63.89
  17   1  -1  886.91   63.09
 -17   1   1  996.90   65.19
  17   1  -1  985.00   61.69
  15  -1  -1 1461.55   82.79
 -15  -1   1 1245.08   82.59
  15  -1  -1 1365.96   82.49
  15   1  -1 1336.87   80.89
  15   1  -1 1120.49   81.79
 -15   1   1 1425.06   83.29
 -13  -1   1  680.93   45.20
  13  -1  -1  709.43   44.90
  13  -1  -1  685.03   44.90
  13   1  -1  665.63   43.50
 -13   1   1  714.63   45.50
  13   1  -1  686.83   45.30
 -11  -1   1  132.89   12.90
  11  -1  -1  139.09   13.00
  11  -1  -1  132.79   13.00
  11   1  -1  147.49   12.00
  11   1  -1  151.38   13.90
 -11   1   1  132.89   13.10
   9  -1  -1  275.67   20.00
   9  -1  -1  324.07   20.60
  -9  -1   1  270.77   20.10
  -9   1   1  328.87   20.80
   9   1  -1  236.48   20.30
   9   1  -1  294.97   19.00
   7  -1  -1 1607.84   91.69
   7  -1  -1 1455.35   91.29
  -7  -1   1 1507.85   91.49
   7   1  -1 1371.36   91.59
  -7   1   1 1727.03   92.09
   7   1  -1 1484.25   91.39
   7   1  -1 1607.84   90.99
   5  -1  -1 7031.40  400.16
   5  -1  -1 7100.69  399.66
  -5  -1   1 6957.40  400.16
   5   1  -1 6509.35  400.36
   5   1  -1 6834.02  399.96
  -5   1   1 7153.68  400.26
   5   1  -1 6576.34  398.96
  -3  -1   1   34.60    3.40
   3  -1  -1   37.10    3.30
   3  -1  -1   39.20    3.60
  -3   1   1   39.20    3.50
  -3   1   1   37.60    3.40
   3   1  -1   33.70    3.90
  -1  -1   1   10.30    1.40
   1  -1   1   62.49    3.60
  -1  -1  -1   54.49    4.20
   1   1   1   61.79    5.20
  -1   1  -1   43.70    4.20
   3  -1   1  319.97   20.30
  -3  -1  -1  324.07   19.60
   3  -1   1  297.17   19.40
   3   1   1  312.17   19.60
  -3   1  -1  332.97   20.20
  -3   1  -1  319.27   19.50
   5  -1   1 2409.16  136.99
  -5  -1  -1 2156.28  137.39
   5  -1   1 2450.85  137.89
  -5  -1  -1 2208.18  136.79
   5   1   1 2284.17  137.39
  -5   1  -1 2352.86  137.59
  -5   1  -1 2504.45  137.19
  -7  -1  -1 3101.39  189.98
   7  -1   1 3544.25  190.78
   7  -1   1 3434.06  189.78
  -7  -1  -1 3104.59  189.48
   7   1   1 2963.10  189.38
   7   1   1 2924.01  189.78
  -7   1  -1 3242.18  190.08
  -7   1  -1 3587.64  190.28
  -9  -1  -1 2016.80  129.49
   9  -1   1 2371.96  128.99
   9  -1   1 2330.17  130.39
   9  -1   1 2345.27  129.59
  -9   1  -1 2185.18  129.69
   9   1   1 2010.60  128.89
  -9   1  -1 2310.17  129.79
   9   1   1 1888.81  129.19
  11  -1   1  595.74   37.40
 -11  -1  -1  526.05   36.50
  11  -1   1  565.94   35.60
 -11  -1  -1  548.65   35.60
  11   1   1  517.15   36.10
 -11   1  -1  580.14   36.70
  11   1   1  536.85   35.80
 -11   1  -1  551.34   36.30
 -13  -1  -1   12.40    6.20
  13  -1   1   19.10    7.90
 -13  -1  -1   20.20    5.30
  13   1   1   21.20    6.10
 -13   1  -1   28.50    6.80
  13   1   1   13.70    6.10
  15  -1   1  307.57   24.30
  15  -1   1  320.47   26.80
 -15  -1  -1  302.57   25.60
  15   1   1  307.17   25.30
 -15   1  -1  343.87   25.70
  15   1   1  325.47   25.10
  17  -1   1  774.12   51.69
  17  -1   1  757.72   47.60
  17   1   1  597.54   47.60
  17   1   1  719.73   48.10
  19  -1   1  408.56   34.20
  19  -1   1  377.56   31.20
  19   1   1  431.06   37.10
  21  -1   1  354.96   28.90
  21  -1   1  360.06   32.70
  21   1   1  313.47   30.60
  23  -1   1    6.90    9.50
  23  -1   1   25.80   13.40
  23   1   1   44.80   13.90
  23   1   1   31.30   12.90
  25  -1   1    0.10   10.80
  25  -1   1   22.30   14.90
  25   1   1    9.40   11.90
  25   1   1   29.20   13.90
  26  -2  -1   71.99   18.00
  26   2  -1   69.79   15.70
  26   2  -1   78.89   14.40
  24  -2  -1   53.19   12.30
  24  -2  -1   46.50   14.20
  24   2  -1   50.89   14.10
  24   2  -1   35.90   13.00
  22  -2  -1   -5.80    8.60
  22  -2  -1    6.20   11.00
  22   2  -1   -7.30    8.60
  22   2  -1    0.00    9.10
  20  -2  -1  123.79   20.40
  20  -2  -1   93.19   16.60
  20  -2  -1   86.89   14.30
  20   2  -1   65.49   13.00
  18  -2  -1 1447.16   88.29
  18  -2  -1 1214.78   85.19
  18   2  -1 1427.06   84.99
  18   2  -1 1446.06   88.09
  16  -2  -1 1266.47   79.49
  16  -2  -1 1149.29   77.39
 -16  -2   1 1235.88   84.29
  16  -2  -1 1169.88   77.09
 -16   2   1 1249.97   78.09
  16   2  -1 1294.17   75.49
  16   2  -1 1247.88   78.29
  14  -2  -1 2022.00  129.19
  14  -2  -1 2265.57  130.19
 -14  -2   1 2201.58  130.19
  14  -2  -1 2068.89  128.39
 -14   2   1 2173.08  129.99
  14   2  -1 2109.49  129.99
  14   2  -1 2186.88  127.49
  12  -2  -1 1176.58   70.39
  12  -2  -1 1127.39   69.79
 -12  -2   1 1135.09   70.29
  12  -2  -1 1127.19   68.99
  12   2  -1 1050.19   67.69
 -12   2   1 1176.48   70.29
  12   2  -1 1105.39   70.39
  10  -2  -1  150.88   13.60
  10  -2  -1  131.49   14.30
  10  -2  -1  172.18   15.00
 -10  -2   1  208.08   15.10
  10   2  -1  178.18   12.50
 -10   2   1  139.59   14.70
  10   2  -1  206.38   16.00
  -8  -2   1  931.81   52.89
   8  -2  -1  804.92   52.49
   8  -2  -1  890.81   52.99
   8  -2  -1  815.62   51.99
   8   2  -1  892.81   53.39
   8   2  -1  832.72   50.59
  -8   2   1  812.62   52.49
   6  -2  -1 1719.53   96.99
  -6  -2   1 1642.44   96.79
  -6  -2   1 1574.74   97.69
   6   2  -1 1478.25   97.09
  -6   2   1 1734.23   97.09
  -4  -2   1 2552.94  152.68
   4  -2  -1 2624.74  151.98
   4  -2  -1 2635.14  152.08
  -4   2   1 2563.64  151.98
   4   2  -1 2483.75  152.38
   4   2  -1 2682.23  151.08
  -4   2   1 2617.34  151.98
  -2  -2   1  718.03   45.40
  -2  -2   1  805.62   46.60
   2  -2  -1  767.42   46.10
  -2  -2   1  751.72   45.20
   2   2  -1  865.71   46.70
  -2   2   1  780.02   46.10
   2   2  -1  686.33   45.30
  -2   2   1  782.22   45.90
   0  -2  -1    7.20    2.10
   0  -2   1    9.30    2.00
   0  -2   1   10.20    1.90
   0  -2  -1   10.90    2.20
   0  -2   1    6.10    1.80
   0   2  -1    5.90    1.60
   0   2  -1    9.00    1.90
   0   2   1    8.80    2.60
   0   2   1    5.10    3.40
   0   2  -1    7.00    1.70
   2  -2   1  773.82   47.20
   2  -2   1  780.62   46.00
  -2  -2  -1  801.92   47.40
   2  -2   1  750.12   46.00
  -2  -2  -1  804.22   46.40
  -2   2  -1  757.22   46.80
   2   2   1  850.11   47.50
  -2   2  -1  719.83   45.90
   4  -2   1  662.43   40.10
  -4  -2  -1  608.34   38.50
  -4  -2  -1  615.14   39.90
  -4   2  -1  630.24   38.60
   4   2   1  692.93   40.10
   4   2   1  644.44   38.60
  -6  -2  -1 4682.03  250.37
  -6  -2  -1 3993.90  248.28
   6  -2   1 4173.58  250.07
   6  -2   1 4070.69  248.78
   6   2   1 4575.84  249.97
  -6   2  -1 4281.67  248.98
  -6   2  -1 4067.89  249.48
   8  -2   1 1736.73  110.99
  -8  -2  -1 1867.31  110.59
  -8  -2  -1 1982.30  112.59
   8  -2   1 1874.01  112.59
   8   2   1 2076.49  112.39
   8   2   1 1738.53  110.49
  -8   2  -1 1868.91  111.39
  -8   2  -1 1840.52  111.89
  10  -2   1  475.95   35.10
 -10  -2  -1  599.54   37.10
  10  -2   1  535.25   37.20
 -10  -2  -1  624.24   36.70
 -10   2  -1  548.55   36.30
  10   2   1  520.35   34.80
 -10   2  -1  539.65   35.70
 -12  -2  -1  387.86   26.60
 -12  -2  -1  374.06   28.30
  12  -2   1  387.46   27.50
  12  -2   1  410.46   30.10
  12   2   1  376.76   27.10
 -12   2  -1  420.86   28.10
  12   2   1  423.46   28.90
 -14  -2  -1  174.38   19.00
  14  -2   1  228.28   21.80
  14  -2   1  232.08   17.50
  14  -2   1  210.88   18.10
 -14  -2  -1  210.68   17.10
  14   2   1  200.98   19.60
 -14   2  -1  219.68   19.00
  14   2   1  184.38   17.90
  16  -2   1  182.58   17.80
  16  -2   1  213.18   22.50
 -16   2  -1  207.68   19.60
  16   2   1  208.18   19.20
  16   2   1  176.68   20.70
  18  -2   1  810.22   54.69
  18  -2   1  880.41   58.79
  18   2   1  839.52   55.19
  20  -2   1  171.78   24.60
  20   2   1  163.28   22.10
  20   2   1  192.58   21.30
  22  -2   1  163.08   24.50
  22  -2   1   91.19   17.50
  22   2   1  137.19   20.70
  22   2   1  108.09   21.50
  24  -2   1   42.40   12.70
  24  -2   1   62.99   15.70
  24   2   1   37.40   12.90
  24   2   1   57.69   13.80
  26  -2   1  138.89   29.50
  26   2   1  116.69   22.10
  26   2   1  112.19   22.60
  27  -3  -1   21.90   17.20
  27  -3  -1   21.10   11.80
  27   3  -1   56.59   17.60
  27   3  -1   47.40   12.50
  25  -3  -1   20.70   10.90
  25  -3  -1   10.50   14.40
  25   3  -1   16.50   11.90
  25   3  -1    3.10   12.90
  23  -3  -1   13.00   13.00
  23  -3  -1   -0.20    9.00
  23   3  -1   17.90    9.10
  23   3  -1   26.60   12.40
  21  -3  -1   33.30   13.60
  21  -3  -1   19.60   10.40
  21  -3  -1   40.10    9.90
  21   3  -1   61.49   13.50
  21   3  -1   45.20    9.60
  19  -3  -1  400.46   35.20
  19   3  -1  396.96   29.90
  19   3  -1  448.66   34.60
  17  -3  -1  541.15   42.00
  17  -3  -1  615.04   41.50
  17  -3  -1  629.14   44.40
  17   3  -1  614.14   39.80
 -17   3   1  648.34   43.40
  17   3  -1  634.84   44.30
  15  -3  -1  594.04   43.80
 -15  -3   1  634.54   45.10
  15  -3  -1  668.63   52.89
  15   3  -1  754.52   46.90
  15   3  -1  635.24   41.50
 -15   3   1  680.13   45.20
 -13  -3   1  176.38   18.70
  13  -3  -1  230.28   17.30
  13  -3  -1  209.58   17.90
  13  -3  -1  189.78   19.50
  13   3  -1  189.28   15.10
  13   3  -1  209.28   19.80
 -13   3   1  209.88   17.70
 -11  -3   1  381.86   27.40
  11  -3  -1  385.96   27.00
  11  -3  -1  402.76   26.40
  11  -3  -1  363.96   27.60
 -11   3   1  373.86   26.70
  11   3  -1  362.96   27.90
  -9  -3   1  462.95   33.20
  -9  -3   1  493.75   32.30
   9  -3  -1  503.25   31.70
   9  -3  -1  520.95   32.40
   9  -3  -1  436.16   32.20
  -9   3   1  475.05   31.80
   9   3  -1  481.45   33.00
  -7  -3   1  149.49   14.20
   7  -3  -1  137.69   12.20
   7  -3  -1  179.98   12.90
   7   3  -1  153.68   13.90
   7   3  -1  143.69   11.80
  -7   3   1  151.78   12.10
  -5  -3   1   94.49   10.10
   5  -3  -1   83.79    8.00
   5  -3  -1   77.29    7.80
  -5   3   1   72.99    8.10
   5   3  -1   76.09    9.50
  -5   3   1   90.09    7.80
   3  -3  -1 1605.74   98.19
   3  -3  -1 1627.14   98.19
  -3  -3   1 1673.23   97.69
  -3  -3   1 1550.24  102.99
   3   3  -1 1736.63   98.89
  -3   3   1 1730.03   98.49
  -3   3   1 1688.83   98.09
   1  -3  -1  198.38   13.70
  -1  -3   1  197.38   14.00
   1  -3  -1  199.28   13.70
   1  -3  -1  186.68   13.00
  -1  -3   1  184.88   12.90
  -1   3   1  197.28   13.50
  -1   3   1  183.68   13.90
   1   3  -1  185.58   13.60
   1   3  -1  171.58   12.80
  -1  -3  -1  624.34   35.00
  -1  -3  -1  527.95   33.90
   1  -3   1  521.55   32.70
   1  -3   1  528.75   33.90
   1  -3   1  540.85   33.60
   1  -3   1  549.74   33.40
   1   3   1  524.25   33.60
   1   3   1  534.95   34.50
  -1   3  -1  578.54   33.80
  -1   3  -1  515.75   33.50
   3  -3   1 1429.26   81.59
  -3  -3  -1 1459.05   82.69
   3  -3   1 1583.24   81.69
   3  -3   1 1301.17   82.09
  -3  -3  -1 1153.28   80.49
   3  -3   1 1416.96   80.79
  -3   3  -1 1207.28   82.29
   3   3   1 1405.06   82.49
  -3   3  -1 1443.46   80.59
   3   3   1 1286.57   81.39
  -5  -3  -1  697.33   45.50
   5  -3   1  758.22   47.80
   5  -3   1  803.02   47.00
   5  -3   1  789.72   46.30
  -5   3  -1  777.82   47.20
  -5   3  -1  796.92   46.10
   5   3   1  766.22   46.90
   5   3   1  664.93   45.50
   5   3   1  810.42   48.00
  -7  -3  -1 1749.43  109.89
  -7  -3  -1 1730.53  107.19
   7  -3   1 1892.61  108.39
   7  -3   1 1872.91  110.09
   7   3   1 1887.31  109.69
  -7   3  -1 1813.22  108.99
  -9  -3  -1  671.63   42.70
  -9  -3  -1  638.34   39.30
   9  -3   1  587.24   40.20
   9  -3   1  662.93   42.70
   9   3   1  566.34   39.20
   9   3   1  740.03   42.50
  -9   3  -1  604.04   40.30
  11  -3   1  268.87   22.40
 -11  -3  -1  248.18   20.50
  11  -3   1  261.07   19.50
 -11  -3  -1  259.77   21.40
 -11  -3  -1  236.68   19.10
 -11   3  -1  265.17   19.70
  11   3   1  232.28   18.30
  11   3   1  250.47   21.10
 -13  -3  -1   50.99    8.70
  13  -3   1   65.19   10.80
 -13  -3  -1   63.39   10.10
  13  -3   1   95.29   15.80
 -13  -3  -1   81.59   12.40
  13   3   1   47.00    7.90
  13   3   1   56.39   10.30
 -13   3  -1   63.59   11.00
  15  -3   1  158.98   19.70
  15  -3   1  112.59   14.80
 -15   3  -1  141.59   17.40
  15   3   1  122.69   14.30
  15   3   1  137.09   18.80
  17  -3   1  326.67   30.20
  17   3   1  302.67   25.10
  17   3   1  346.37   28.80
 -17   3  -1  314.57   27.20
  19  -3   1   23.30    8.30
  19  -3   1   18.10   12.90
  19   3   1   11.80    8.60
  19   3   1   12.20   10.40
  21  -3   1   53.49   15.50
  21   3   1   52.49   11.10
  21   3   1   52.19   13.10
  23  -3   1   -0.80   14.30
  23  -3   1   -7.70    8.30
  23   3   1   -6.60   11.20
  23   3   1   -9.80   13.40
  25   3   1   17.40   12.90
  25   3   1    8.10   10.70
  26  -4  -1  290.87   35.80
  26  -4  -1  254.67   27.00
  26   4  -1  257.67   23.20
  24  -4  -1  167.98   28.80
  24  -4  -1  157.88   20.90
  24   4  -1  182.48   18.20
  24   4  -1  136.29   24.80
  22  -4  -1   -5.40   13.70
  22  -4  -1    1.00   10.10
  22   4  -1   10.60   12.00
  20  -4  -1   65.29   14.90
  20  -4  -1   51.19   11.70
  20   4  -1   41.60   12.40
  18  -4  -1  110.89   19.60
  18  -4  -1   98.99   16.10
  16  -4  -1  370.26   26.70
  16  -4  -1  250.17   24.20
  16  -4  -1  349.77   28.60
 -16   4   1  315.27   26.10
  14  -4  -1  214.08   21.50
  14  -4  -1  217.48   19.00
 -14  -4   1  203.18   19.90
  14  -4  -1  191.98   17.60
  14   4  -1  223.98   30.40
 -14   4   1  199.88   18.90
 -12  -4   1  -12.00    7.10
  12  -4  -1    1.50    4.30
  12  -4  -1    2.90    4.40
  12  -4  -1   -5.70    5.20
 -12  -4   1    4.00    5.40
 -12   4   1   -0.40    4.10
  12   4  -1   -7.50    5.30
  10  -4  -1  235.28   21.20
  10  -4  -1  281.27   20.80
 -10  -4   1  252.27   22.50
 -10  -4   1  263.77   21.20
  10  -4  -1  282.77   20.40
  10   4  -1  251.37   19.30
 -10   4   1  269.97   20.20
  10   4  -1  301.67   22.60
   8  -4  -1 1636.64   96.99
  -8  -4   1 1549.14   98.89
   8  -4  -1 1711.13   97.39
   8  -4  -1 1499.15   97.59
  -8   4   1 1565.64   96.69
   8   4  -1 1601.94   98.09
   8   4  -1 1723.93   95.89
  -6  -4   1 1323.37   80.99
   6  -4  -1 1314.87   79.19
   6  -4  -1 1354.26   79.19
   6   4  -1 1297.17   79.99
  -6   4   1 1279.27   79.39
   6   4  -1 1304.77   77.99
  -6   4   1 1301.17   78.79
  -4  -4   1  902.21   55.19
   4  -4  -1  916.01   56.79
  -4  -4   1  945.41   57.29
   4  -4  -1  925.51   55.89
   4  -4  -1  923.51   55.69
   4   4  -1  879.01   56.39
  -4   4   1  847.32   55.89
   4   4  -1  912.31   54.89
  -4   4   1  963.90   56.49
   2  -4  -1  412.96   27.70
   2  -4  -1  409.06   27.30
  -2  -4   1  436.26   28.70
  -2  -4   1  419.26   26.90
  -2  -4   1  459.05   27.40
   2  -4  -1  424.16   27.90
   2   4  -1  438.36   27.20
  -2   4   1  416.66   27.80
   2   4  -1  437.96   28.30
   0  -4   1  152.98   13.50
   0  -4  -1  205.98   14.70
   0  -4  -1  191.28   14.30
   0  -4   1  219.28   14.20
   0   4  -1  168.48   13.70
   0   4   1  188.88   14.00
   0   4   1  179.28   15.10
   0   4  -1  206.08   14.60
  -2  -4  -1   62.79    7.70
  -2  -4  -1   69.49    8.50
   2  -4   1   62.49    7.10
   2  -4   1   59.99    6.70
   2  -4   1   52.29    7.40
  -2   4  -1   49.30    7.20
   2   4   1   62.59    8.70
   2   4   1   61.79    7.10
  -2   4  -1   40.60    7.00
  -4  -4  -1   42.80    5.00
   4  -4   1   25.60    5.10
   4  -4   1   33.60    4.80
   4  -4   1   29.30    4.90
  -4  -4  -1   24.40    6.00
   4  -4   1   39.50    6.60
   4   4   1   42.10    6.80
  -4   4  -1   33.70    4.40
   4   4   1   23.30    5.90
  -6  -4  -1   34.70    5.40
   6  -4   1   25.50    5.20
   6  -4   1   40.30    5.40
   6  -4   1   42.50    7.60
   6  -4   1   37.80    5.80
   6   4   1   43.90    7.80
   6   4   1   29.20    6.80
   8  -4   1  834.22   51.89
   8  -4   1  862.51   49.60
   8   4   1  836.82   50.19
   8   4   1  709.63   50.79
  -8   4  -1  725.83   48.80
 -10  -4  -1  494.15   33.10
  10  -4   1  621.34   35.50
 -10  -4  -1  443.16   37.00
  10  -4   1  536.35   35.70
  10  -4   1  618.34   38.30
 -10   4  -1  516.85   34.70
  10   4   1  534.65   33.30
  10   4   1  508.05   36.90
  12  -4   1   63.59   10.30
  12  -4   1   40.30    7.60
 -12  -4  -1   46.40    7.50
 -12   4  -1   58.99    9.60
  12   4   1   30.80    6.10
  12   4   1   49.99    9.60
 -14  -4  -1  248.68   24.00
  14  -4   1  278.47   22.60
  14  -4   1  265.17   22.50
 -14  -4  -1  277.47   19.50
  14   4   1  302.27   29.40
  14   4   1  263.97   20.10
 -14   4  -1  279.17   22.50
  16  -4   1  909.91   58.09
  16  -4   1  862.51   55.59
  16   4   1  798.62   51.09
 -16   4  -1  794.02   53.59
  16   4   1  707.93   54.59
  18  -4   1  574.04   35.40
  18  -4   1  589.84   42.90
  18  -4   1  431.26   36.30
  18   4   1  492.55   34.30
  18   4   1  418.16   38.10
  20  -4   1  308.97   32.70
  20  -4   1  313.87   24.70
  20   4   1  220.08   27.60
  20   4   1  284.17   23.40
  22  -4   1   11.20   16.00
  22  -4   1   25.20    8.90
  22   4   1   13.50   12.20
  22   4   1   17.60    8.80
  24  -4   1   -3.10    8.20
  24  -4   1   -6.90   20.00
  24   4   1    1.70    8.60
  24   4   1  -14.50   11.00
  25  -5  -1  209.28   32.50
  25  -5  -1  183.78   23.40
  25   5  -1  199.38   37.10
  23  -5  -1   53.09   20.20
  23   5  -1   40.80   13.90
  21  -5  -1   -9.90   14.90
  21  -5  -1    7.80   10.60
  21   5  -1    7.60   11.30
  19  -5  -1  127.39   19.30
  19  -5  -1  148.79   24.20
  19   5  -1  188.48   23.10
  17  -5  -1  349.57   30.00
  17  -5  -1  408.26   33.50
  17   5  -1  362.16   31.70
  15  -5  -1  163.48   26.70
  15  -5  -1  209.98   22.30
  15   5  -1  182.18   17.10
 -15   5   1  179.38   18.40
  15   5  -1  160.58   20.40
  13  -5  -1   59.89   10.80
 -13  -5   1   45.80   10.30
  13  -5  -1   43.30    8.90
  13  -5  -1   48.60    9.80
 -13  -5   1   45.30    9.50
  13   5  -1   59.19   10.20
 -13   5   1   44.10    9.20
  13   5  -1   50.69    9.90
  11  -5  -1   29.70    7.40
  11  -5  -1   43.60    7.80
  11  -5  -1   35.20    9.10
 -11  -5   1   34.90   10.60
  11   5  -1   38.30    6.50
  11   5  -1   48.70    9.10
 -11   5   1   44.10    7.50
   9  -5  -1 1206.38   70.49
  -9  -5   1 1093.79   72.49
   9  -5  -1 1113.69   70.99
   9  -5  -1 1101.99   69.89
   9   5  -1 1163.08   68.59
  -9   5   1 1113.59   69.49
   9   5  -1 1142.89   71.39
  -7  -5   1 2592.04  158.18
   7  -5  -1 2590.84  155.88
   7  -5  -1 2682.53  156.08
   7   5  -1 2599.44  156.88
  -7   5   1 2586.24  156.48
   7   5  -1 2745.53  154.68
  -7   5   1 2577.94  155.28
   5  -5  -1 2783.82  165.48
  -5  -5   1 2607.04  166.98
   5  -5  -1 2706.33  165.18
   5  -5  -1 2529.65  164.68
  -5  -5   1 2977.30  165.08
  -5   5   1 2722.93  164.68
   5   5  -1 2898.51  166.38
  -5   5   1 2834.92  165.88
   5   5  -1 3092.79  164.68
   3  -5  -1 2017.20  128.49
  -3  -5   1 2284.37  128.59
  -3  -5   1 2241.08  130.49
   3  -5  -1 2181.78  129.09
  -3  -5   1 1941.51  127.39
   3  -5  -1 2075.59  128.69
  -3   5   1 2221.38  129.19
   3   5  -1 2317.07  128.39
  -3   5   1 2064.59  128.09
   3   5  -1 2342.37  129.79
   1  -5  -1 1449.06   87.79
   1  -5  -1 1376.46   87.19
  -1  -5   1 1664.33   87.59
  -1  -5   1 1457.75   88.39
   1  -5  -1 1419.66   87.79
  -1  -5   1 1326.67   86.79
  -1   5   1 1488.45   87.69
  -1   5   1 1338.77   88.39
   1   5  -1 1543.55   88.29
   1   5  -1 1486.65   87.29
  -1  -5  -1  278.87   20.40
   1  -5   1  314.37   19.10
   1  -5   1  311.07   20.00
   1  -5   1  249.58   20.00
   1  -5   1  277.37   20.40
  -1  -5  -1  293.57   21.10
  -1   5  -1  316.47   20.90
  -1   5  -1  248.68   19.80
   1   5   1  268.67   21.50
   1   5   1  265.37   19.90
   3  -5   1  354.06   24.50
   3  -5   1  324.97   23.60
   3  -5   1  384.96   24.60
   3  -5   1  382.96   26.00
  -3  -5  -1  339.77   26.20
  -3  -5  -1  396.26   25.60
  -3   5  -1  332.87   23.20
  -3   5  -1  378.26   25.40
   3   5   1  403.56   26.90
   5  -5   1  321.97   25.80
  -5  -5  -1  343.27   21.50
   5  -5   1  311.67   21.90
   5  -5   1  341.57   24.70
   5  -5   1  275.17   22.40
   5   5   1  317.47   24.80
   5   5   1  372.76   23.10
   7  -5   1 2784.12  176.08
   7  -5   1 2946.61  174.68
   7  -5   1 2831.82  175.78
   7  -5   1 3072.59  174.18
  -7  -5  -1 2938.41  176.78
  -7   5  -1 2857.21  173.38
   7   5   1 3048.50  174.48
   7   5   1 3102.69  176.28
   9  -5   1  589.64   38.10
  -9  -5  -1  600.24   41.50
   9  -5   1  573.14   40.60
   9  -5   1  569.94   39.20
   9   5   1  610.44   40.50
   9   5   1  585.14   38.60
  -9   5  -1  564.94   37.40
 -11  -5  -1  117.59   16.10
  11  -5   1   96.79   16.50
  11  -5   1  130.09   13.30
  11  -5   1  103.09   12.60
 -11   5  -1  111.99   12.40
  11   5   1  139.69   18.50
  11   5   1  119.09   14.00
  13  -5   1  198.28   21.60
 -13  -5  -1  144.79   19.50
  13  -5   1  169.18   17.10
  13   5   1  175.18   19.40
 -13   5  -1  144.99   16.10
  15  -5   1  461.05   35.90
  15  -5   1  511.25   40.60
  15   5   1  551.24   38.70
 -15   5  -1  499.15   38.00
  17  -5   1  996.10   69.99
  17   5   1 1039.00   67.79
 -17   5  -1  988.10   66.19
  19  -5   1  580.94   46.90
  19  -5   1  798.62   54.99
  19   5   1  709.23   50.79
  21  -5   1  377.06   37.00
  21  -5   1  246.78   24.90
  21   5   1  342.27   31.90
  23  -5   1   -9.90   16.40
  23  -5   1    5.70    8.00
  23   5   1   25.90   13.60
  25  -5   1   -9.60    8.20
  25   5   1   -4.30   17.60
  24  -6  -1  108.29   21.60
  24  -6  -1   86.29   16.40
  24   6  -1  134.89   26.70
  24   6  -1  146.19   26.00
  22  -6  -1   94.29   24.90
  22  -6  -1   64.49   14.70
  22   6  -1   76.39   17.00
  22   6  -1   77.29   13.30
  20  -6  -1  -10.90   13.90
  20  -6  -1   11.80   10.70
  20   6  -1   30.80   10.20
  20   6  -1   33.20   13.20
  18  -6  -1  385.46   35.60
  18  -6  -1  310.47   30.20
  18   6  -1  373.56   28.80
  18   6  -1  432.76   34.10
  16  -6  -1  419.66   35.80
  16  -6  -1  369.06   32.50
  16   6  -1  382.86   30.40
  16   6  -1  485.15   35.90
 -16   6   1  473.65   33.10
  14  -6  -1   63.79   13.00
  14  -6  -1   91.09   14.60
  14   6  -1  110.89   17.60
  14   6  -1   69.89   12.10
 -14   6   1   91.69   13.80
  12  -6  -1    7.50    7.30
  12  -6  -1   13.60    7.40
  12  -6  -1    4.60    6.50
 -12  -6   1    9.80    8.60
 -12   6   1   11.30    6.50
  12   6  -1   10.80    7.40
  12   6  -1    7.00    5.70
  10  -6  -1  117.49   13.60
  10  -6  -1  115.99   13.10
 -10  -6   1  122.19   17.00
  10   6  -1  101.39   11.50
 -10   6   1  124.49   12.50
   8  -6  -1  386.16   27.30
   8  -6  -1  411.56   30.10
  -8  -6   1  386.56   33.20
   8  -6  -1  360.66   27.90
   8  -6  -1  373.96   26.40
  -8   6   1  351.46   28.00
  -8   6   1  380.66   26.30
   8   6  -1  377.26   25.70
   8   6  -1  419.26   29.20
  -6  -6   1 2467.35  150.48
   6  -6  -1 2581.44  151.28
  -6  -6   1 2726.93  154.08
   6  -6  -1 2539.75  150.98
   6  -6  -1 2477.95  150.48
  -6   6   1 2568.34  150.28
   6   6  -1 2538.55  152.08
   6   6  -1 2469.25  149.88
  -6   6   1 2451.65  151.58
   4  -6  -1 2764.52  163.58
  -4  -6   1 2466.75  161.38
  -4  -6   1 2907.41  165.58
   4  -6  -1 2711.43  163.08
  -4  -6   1 2767.02  162.88
   4  -6  -1 2713.23  162.98
  -4   6   1 2765.02  163.78
  -4   6   1 2781.52  162.48
   4   6  -1 2823.92  162.58
   4   6  -1 2810.82  164.28
  -2  -6   1 1137.09   67.69
   2  -6  -1 1036.40   67.39
  -2  -6   1  964.10   66.79
   2  -6  -1 1105.49   68.09
  -2  -6   1 1186.18   69.79
   2  -6  -1 1119.59   68.29
  -2   6   1 1015.70   68.89
   2   6  -1 1149.58   68.99
   2   6  -1 1151.68   67.59
  -2   6   1 1171.98   68.39
   0  -6   1   32.90    6.80
   0  -6   1   40.70    7.80
   0  -6  -1   26.00    5.30
   0  -6  -1   34.50    7.00
   0  -6   1   41.20    6.30
   0  -6  -1   53.59    9.60
   0   6  -1   44.10    7.20
   0   6  -1   42.40    7.90
   0   6   1   31.10    7.80
   0   6   1   38.40    7.10
   2  -6   1   34.40    8.00
  -2  -6  -1   40.40    7.40
   2  -6   1   51.69    9.50
   2  -6   1   30.40    5.40
   2  -6   1   38.70    6.60
  -2  -6  -1   43.60    8.20
  -2   6  -1   35.80    7.60
   2   6   1   50.09    8.80
  -2   6  -1   50.49    8.10
   2   6   1   37.90    8.70
  -4  -6  -1  295.37   24.10
   4  -6   1  350.76   23.30
  -4  -6  -1  347.07   26.00
   4  -6   1  315.07   22.10
   4  -6   1  355.86   23.20
   4   6   1  282.87   22.70
  -4   6  -1  339.07   21.50
   4   6   1  277.67   24.80
   6  -6   1  301.67   26.30
   6  -6   1  367.16   24.90
  -6  -6  -1  299.27   22.60
   6  -6   1  354.36   23.90
   6  -6   1  371.86   23.80
   6   6   1  308.07   24.10
   6   6   1  351.26   27.00
  -6   6  -1  398.96   23.50
  -8  -6  -1  942.61   65.99
   8  -6   1  934.81   63.89
   8  -6   1 1008.90   60.09
   8  -6   1  978.40   61.79
   8  -6   1 1000.20   61.19
  -8   6  -1 1007.60   60.39
   8   6   1 1012.00   63.79
   8   6   1  963.00   61.29
  10  -6   1   36.60    7.50
  10  -6   1   42.60    8.00
 -10  -6  -1   42.60   10.30
  10  -6   1   55.79    8.40
  10  -6   1   45.60   11.10
  10   6   1   51.59    8.70
  10   6   1   43.30    9.20
 -10   6  -1   44.40    7.50
  12  -6   1   73.29    9.90
  12  -6   1   61.39   12.70
  12   6   1   49.99   10.80
  12   6   1   46.40   10.30
 -12   6  -1   54.29    9.80
  14  -6   1  427.96   36.40
  14  -6   1  520.75   41.40
 -14   6  -1  593.14   38.40
  14   6   1  558.84   40.20
  14   6   1  508.85   37.60
  16  -6   1  417.26   36.40
  16  -6   1  576.04   44.00
  16   6   1  510.15   37.90
  16   6   1  538.95   40.50
 -16   6  -1  535.75   37.40
  18  -6   1  442.26   42.90
  18   6   1  493.05   39.80
  18   6   1  503.65   39.10
  20  -6   1  189.68   29.80
  20  -6   1  142.89   20.20
  20   6   1  207.58   23.30
  20   6   1  234.28   27.00
  22  -6   1   35.40   18.70
  22   6   1   56.89   15.10
  22   6   1   77.59   16.40
  24  -6   1  -30.00   15.00
  24   6   1   -1.30   12.10
  24   6   1    0.60   13.20
  23  -7  -1  -10.30   11.10
  23  -7  -1   12.60   16.30
  23   7  -1   11.20   10.40
  23   7  -1    6.70   13.20
  21  -7  -1   37.60   22.40
  21  -7  -1   26.70   12.40
  21   7  -1   -5.30    9.00
  21   7  -1   -7.90   11.70
  19  -7  -1   48.80   15.00
  19  -7  -1   46.60   12.30
  19   7  -1   66.29   11.20
  19   7  -1   30.00   12.70
  17  -7  -1   40.70   13.40
  17  -7  -1   56.79   11.30
  17   7  -1   28.40   10.90
  17   7  -1   54.19   10.00
  15  -7  -1  327.77   27.00
  15  -7  -1  336.87   31.00
  15   7  -1  327.87   24.10
 -15   7   1  280.87   25.30
  15   7  -1  267.47   28.40
  13  -7  -1  193.48   19.00
  13  -7  -1  240.38   21.90
  13  -7  -1  195.48   24.00
  13   7  -1  184.68   22.70
 -13   7   1  207.58   19.60
  13   7  -1  234.08   18.60
  11  -7  -1  134.59   17.40
  11  -7  -1  142.59   18.50
  11  -7  -1  137.79   15.10
  11   7  -1  135.89   19.00
 -11   7   1  135.49   14.90
  11   7  -1  161.08   15.00
   9  -7  -1   44.60    8.90
   9  -7  -1   68.49   11.90
  -9  -7   1   51.19   11.70
   9   7  -1   47.80   10.00
   9   7  -1   39.70    7.70
   7  -7  -1    1.10    5.30
   7  -7  -1   20.20    5.40
   7  -7  -1   15.50    5.40
  -7  -7   1    6.50    7.40
   7  -7  -1   24.10    7.30
  -7  -7   1   22.00    8.80
  -7   7   1   15.30   11.90
  -7   7   1   12.60    4.70
   7   7  -1    6.90    9.90
   7   7  -1   15.40    5.90
  -5  -7   1   57.19   10.50
  -5  -7   1   45.00   10.10
   5  -7  -1   49.00   11.80
  -5  -7   1   44.50    6.90
  -5   7   1   57.19    9.20
   5   7  -1   37.20    8.50
   5   7  -1   43.60    7.50
  -5   7   1   63.49    8.20
  -3  -7   1    5.20    5.50
  -3  -7   1    3.20    3.80
   3  -7  -1    0.90    4.40
   3  -7  -1   -1.30    3.20
  -3  -7   1    5.20    4.50
   3   7  -1   -0.20    3.90
  -3   7   1    2.30    4.70
   3   7  -1   -0.90    5.60
   1  -7  -1    3.80    3.90
  -1  -7   1    0.60    4.50
  -1  -7   1   -2.00    4.10
   1  -7  -1    3.20    4.50
   1  -7  -1   -2.70    4.80
  -1  -7   1   -0.10    3.90
  -1  -7   1   -4.20    3.00
  -1   7   1   -7.90    4.80
   1   7  -1   -5.70    4.60
  -1   7   1   -7.80    4.40
   1   7  -1   -1.90    4.90
  -1  -7  -1  344.97   23.50
  -1  -7  -1  322.47   24.50
   1  -7   1  322.77   23.60
   1  -7   1  319.77   24.60
  -1  -7  -1  320.47   25.00
   1  -7   1  363.16   22.90
   1  -7   1  327.47   24.20
   1   7   1  306.87   25.80
   1   7   1  305.47   23.70
  -1   7  -1  298.27   23.90
  -1   7  -1  310.77   24.80
   3  -7   1   30.40    6.10
  -3  -7  -1   35.40    8.30
  -3  -7  -1   25.70    7.00
   3  -7   1   49.60    8.80
   3  -7   1   37.60    7.10
  -3   7  -1   32.10    7.40
  -3   7  -1   30.00    7.30
   3   7   1   27.90    7.80
   3   7   1   37.20    7.00
   5  -7   1  753.02   49.30
   5  -7   1  685.43   51.49
  -5  -7  -1  738.03   52.79
   5  -7   1  809.02   49.30
   5  -7   1  808.32   51.99
  -5  -7  -1  878.31   51.49
   5   7   1  742.53   52.29
   5   7   1  812.52   49.99
   7  -7   1    5.10    4.30
   7  -7   1    3.50    5.30
   7  -7   1    3.70    4.40
  -7  -7  -1    4.40    6.60
   7   7   1   -5.30    6.20
  -7   7  -1   -1.90    3.40
   7   7   1    2.60    5.60
   9  -7   1   75.29   10.40
   9  -7   1   70.69   13.70
   9  -7   1   77.59   12.00
   9   7   1   78.09   15.70
   9   7   1   56.89    9.80
  -9   7  -1   53.59    9.70
  11  -7   1   11.50    5.30
  11  -7   1   17.80   11.50
  11  -7   1    6.70    7.40
 -11   7  -1   10.00    6.40
  11   7   1   17.80    8.30
  11   7   1   17.00    9.50
  13  -7   1   11.20   12.20
  13  -7   1   11.60    8.30
  13  -7   1   20.50    6.00
  13   7   1   20.10   10.30
 -13   7  -1    3.00    7.30
  13   7   1   16.70    9.30
  15  -7   1   10.80    5.70
  15  -7   1   -9.50   11.80
 -15   7  -1   20.00    7.60
  15   7   1   -0.20    9.90
  15   7   1    1.10    9.80
  17  -7   1  156.48   14.40
  17  -7   1  146.09   26.30
  17  -7   1  149.09   18.60
  17   7   1  123.39   22.10
  19  -7   1   52.89   12.70
  19  -7   1   34.90   18.30
  19   7   1   39.70   13.50
  19   7   1   59.79   13.70
  21  -7   1   32.10   11.80
  21  -7   1   66.79   20.10
  21   7   1   51.99   19.30
  21   7   1   57.79   14.10
  23  -7   1  -15.30   14.60
  23   7   1  -10.90   12.00
  23   7   1  -10.10   11.90
  22  -8  -1    6.20   15.40
  22   8  -1    3.30   12.70
  22   8  -1    1.30    8.80
  20  -8  -1  176.18   28.50
  20  -8  -1  143.39   21.80
  20   8  -1  236.38   36.50
  20   8  -1  144.09   18.00
  18  -8  -1  355.06   36.50
  18  -8  -1  495.05   39.70
  18  -8  -1  427.56   34.20
  18   8  -1  396.76   30.40
  18   8  -1  406.96   37.10
  16  -8  -1  615.24   45.60
  16  -8  -1  484.05   37.80
  16  -8  -1  600.54   41.70
  16   8  -1  574.24   38.20
  16   8  -1  536.75   43.50
  14  -8  -1  442.26   39.40
  14  -8  -1  435.46   33.30
  14  -8  -1  519.55   36.60
  14   8  -1  459.85   38.10
  14   8  -1  491.55   33.30
 -14   8   1  477.95   34.20
  12  -8  -1  120.19   18.60
  12  -8  -1  121.59   20.30
  12  -8  -1  144.19   15.70
  12   8  -1  150.98   20.70
 -12   8   1  154.38   15.60
  12   8  -1  103.29   14.90
  10  -8  -1   13.20    6.00
  10  -8  -1    7.00    7.30
  10  -8  -1   12.00    9.20
  10   8  -1   12.30    8.50
  10   8  -1    8.40    7.50
 -10   8   1    0.00    5.20
   8  -8  -1  166.48   15.90
   8  -8  -1  135.59   16.60
   8  -8  -1  137.99   17.90
   8   8  -1  134.39   15.80
   8   8  -1  151.48   19.30
  -8   8   1  167.38   15.10
  -8   8   1  151.58   17.60
   6  -8  -1  227.18   19.70
  -6  -8   1  200.18   17.30
  -6  -8   1  228.88   23.90
   6  -8  -1  207.78   22.60
   6  -8  -1  235.48   19.50
   6  -8  -1  246.78   19.40
  -6  -8   1  219.88   20.70
   6   8  -1  218.28   19.20
  -6   8   1  240.88   20.70
   6   8  -1  227.08   22.30
   4  -8  -1  262.77   21.90
   4  -8  -1  287.97   21.80
  -4  -8   1  270.47   22.00
   4  -8  -1  267.07   21.60
   4  -8  -1  269.97   21.20
  -4  -8   1  252.17   20.20
  -4  -8   1  254.87   24.30
  -4   8   1  287.07   23.10
   4   8  -1  289.57   21.50
   2  -8  -1  132.59   13.50
   2  -8  -1  143.79   14.80
  -2  -8   1  121.79   13.40
  -2  -8   1  110.49   22.20
   2  -8  -1  146.49   15.00
  -2  -8   1  162.08   15.10
  -2   8   1  138.59   14.70
   2   8  -1  135.49   14.10
   2   8  -1  124.09   16.10
   0  -8  -1   14.70    9.50
   0  -8   1    9.70    4.20
   0  -8  -1   25.80    9.60
   0  -8   1   27.90    6.90
   0  -8   1   13.00    5.70
   0  -8  -1   19.30    5.50
   0  -8   1   22.30    6.90
   0   8   1    6.10    7.20
   0   8  -1   15.50    6.70
   0   8   1    5.50    6.10
   0   8  -1    8.50    6.30
   2  -8   1   28.80    5.70
  -2  -8  -1   24.30    7.50
  -2  -8  -1   28.20    8.10
   2  -8   1   38.50    8.70
   2  -8   1   28.60    6.80
  -2   8  -1   26.10    7.20
   2   8   1   17.40    7.10
  -2   8  -1   24.20    7.00
   4  -8   1  705.53   45.60
   4  -8   1  709.73   46.50
   4  -8   1  735.63   48.60
  -4  -8  -1  613.04   48.50
   4  -8   1  662.63   46.20
  -4  -8  -1  747.83   48.30
  -4   8  -1  730.03   48.30
   4   8   1  763.42   46.80
   4   8   1  719.93   49.50
  -6  -8  -1 1240.98   79.19
   6  -8   1 1143.79   77.09
   6  -8   1 1266.77   80.59
   6  -8   1 1212.68   77.19
   6   8   1 1335.77   78.19
   6   8   1 1319.57   81.09
   8  -8   1  994.50   61.89
   8  -8   1  970.50   62.59
   8  -8   1  926.81   65.89
   8   8   1 1083.79   63.19
   8   8   1  966.20   65.89
  -8   8  -1  976.60   61.29
  10  -8   1  157.38   22.80
  10  -8   1  186.38   16.90
  10  -8   1  189.78   18.70
  10   8   1  161.68   22.40
  10   8   1  187.98   19.10
 -10   8  -1  171.68   16.90
  12  -8   1   59.79   15.60
  12  -8   1  101.69   14.50
  12   8   1   63.29   13.20
  12   8   1   65.59   11.90
  14  -8   1   14.50   10.70
  14  -8   1   17.70   14.60
 -14   8  -1   25.30    7.80
  14   8   1   22.90   11.20
  14   8   1   47.50   10.90
  16  -8   1  169.58   19.50
  16  -8   1  187.38   28.20
  16  -8   1  184.38   16.20
  16   8   1  162.38   24.40
  18  -8   1  227.68   23.20
  18  -8   1  236.88   18.90
  18   8   1  213.78   23.80
  18   8   1  210.78   27.80
  20  -8   1  166.08   30.10
  20  -8   1   84.29   16.00
  20   8   1  108.29   19.60
  20   8   1  134.49   27.00
  22  -8   1  -21.00   11.60
  22  -8   1  -14.20   17.30
  22   8   1  -11.70   11.00
  22   8   1  -14.20   12.50
  21  -9  -1    9.30   13.40
  21  -9  -1   40.40   17.90
  21   9  -1   35.50   14.00
  21   9  -1   50.49   10.70
  19  -9  -1  108.19   17.90
  19  -9  -1  100.39   20.40
  19   9  -1  137.59   16.80
  19   9  -1  144.19   24.40
  17  -9  -1  440.56   44.10
  17  -9  -1  415.46   35.60
  17  -9  -1  490.55   33.40
  17   9  -1  413.06   32.20
  17   9  -1  454.45   39.70
  15  -9  -1  579.54   43.90
  15  -9  -1  600.84   43.80
  15  -9  -1  639.44   47.60
  15   9  -1  573.14   46.20
  15   9  -1  573.04   40.40
  13  -9  -1  203.28   24.30
  13  -9  -1  190.68   21.30
  13   9  -1  201.38   18.90
  13   9  -1  174.28   24.90
 -13   9   1  183.08   18.80
  11  -9  -1   18.90   10.00
  11  -9  -1   76.59   19.00
  11  -9  -1   53.59   13.90
  11   9  -1   30.10    9.10
 -11   9   1   22.30    7.30
  11   9  -1   31.20   11.00
   9  -9  -1  285.07   24.00
   9  -9  -1  231.58   28.50
   9  -9  -1  235.48   24.10
   9   9  -1  252.07   25.50
  -9   9   1  215.88   27.90
   9   9  -1  270.37   21.80
   7  -9  -1  637.74   46.80
   7  -9  -1  665.83   46.10
   7  -9  -1  666.43   45.20
  -7  -9   1  678.63   45.80
  -7   9   1  638.24   46.10
   7   9  -1  637.34   43.90
   7   9  -1  681.33   47.30
   5  -9  -1 1262.57   81.59
  -5  -9   1 1308.27   82.39
   5  -9  -1 1353.96   82.29
  -5  -9   1 1117.19   79.69
   5  -9  -1 1306.67   81.59
   5   9  -1 1309.07   83.49
   5   9  -1 1392.06   81.39
  -5   9   1 1385.76   83.19
  -3  -9   1 1215.18   79.09
   3  -9  -1 1049.79   80.39
   3  -9  -1 1253.57   76.99
  -3  -9   1 1094.49   75.09
  -3  -9   1 1326.77   84.69
   3  -9  -1 1116.29   75.79
   3  -9  -1 1214.98   76.59
   3   9  -1 1296.27   78.29
   3   9  -1 1287.27   76.39
  -3   9   1 1256.47   77.09
  -1  -9   1  272.47   22.80
   1  -9  -1  255.97   22.90
  -1  -9   1  212.48   22.40
  -1  -9   1  280.17   21.40
  -1  -9   1  272.07   24.40
   1  -9  -1  277.17   23.50
   1  -9  -1  199.98   21.20
  -1   9   1  221.48   24.00
  -1   9   1  276.97   22.70
   1   9  -1  212.58   28.70
   1  -9   1   41.40    9.60
  -1  -9  -1   17.40    8.50
   1  -9   1   17.70    7.00
   1  -9   1   29.60    8.80
   1  -9   1   38.40   10.50
  -1  -9  -1   27.70    9.00
  -1  -9  -1   35.80   10.40
  -1   9  -1   34.40    9.90
  -1   9  -1   29.80   10.00
   1   9   1   39.10   10.90
   1   9   1   43.20    9.50
   3  -9   1  771.62   57.99
  -3  -9  -1  861.11   57.39
   3  -9   1  825.82   54.49
   3  -9   1  856.21   65.79
   3  -9   1  900.81   59.49
  -3   9  -1  884.11   57.29
   3   9   1  773.22   61.09
   3   9   1  929.71   59.29
   5  -9   1 1142.69   74.49
  -5  -9  -1 1166.18   73.89
   5  -9   1 1105.59   71.79
   5  -9   1 1167.58   71.49
   5   9   1 1200.38   75.39
   5   9   1 1051.39   74.39
   7  -9   1  922.61   58.49
   7  -9   1  939.01   58.79
   7  -9   1  859.11   61.79
   7   9   1  921.91   60.49
   7   9   1  902.41   62.19
   9  -9   1  702.33   46.50
   9  -9   1  671.63   45.40
   9  -9   1  691.83   50.89
  -9   9  -1  790.12   45.40
   9   9   1  641.04   49.80
   9   9   1  630.44   49.40
  11  -9   1   46.40    9.60
  11  -9   1   41.40   13.70
  11   9   1   27.70   11.80
  13  -9   1  -13.10   11.30
  13  -9   1   -1.80    7.90
 -13   9  -1  -12.20    6.60
  13   9   1   -2.80    8.40
  15  -9   1  241.58   24.10
  15  -9   1  257.37   31.90
  15  -9   1  303.67   22.00
  15   9   1  244.18   29.60
  15   9   1  243.98   24.50
 -15   9  -1  284.67   23.90
  17  -9   1  543.85   34.80
  17  -9   1  489.45   48.50
  17  -9   1  456.75   37.40
  17   9   1  496.35   37.90
  19  -9   1  287.27   21.40
  19  -9   1  187.18   24.60
  19  -9   1  246.68   35.10
  19   9   1  267.87   30.70
  19   9   1  245.48   24.80
  21  -9   1  230.08   34.40
  21   9   1  212.38   23.30
  21   9   1  205.88   30.10
  20 -10  -1   29.10   14.80
  20 -10  -1   36.50   17.80
  20  10  -1   36.80   14.60
  18 -10  -1   79.79   18.70
  18 -10  -1   58.39   15.60
  18  10  -1   75.69   16.10
  18  10  -1   85.99   17.20
  16 -10  -1   40.70   12.20
  16 -10  -1   45.90    9.80
  16 -10  -1   17.00   15.80
  16  10  -1   48.80   11.30
  16  10  -1   21.10   15.60
  14 -10  -1   46.40   11.60
  14 -10  -1   57.69   14.20
  14  10  -1   45.30   13.40
  14  10  -1   52.89   11.40
  12 -10  -1  -10.50    7.50
  12 -10  -1   -5.50    9.50
  12 -10  -1    1.30    6.80
  12  10  -1   -3.60    9.20
 -12  10   1  -11.90    9.60
  12  10  -1    6.90    8.20
  10 -10  -1   33.70   10.70
  10 -10  -1   17.80    9.40
 -10  10   1   47.90    9.20
  10  10  -1   10.10   10.60
  10  10  -1   27.10   10.00
   8 -10  -1   40.80   10.40
   8 -10  -1   19.80   10.00
  -8 -10   1   27.70   12.20
   8 -10  -1   35.30    8.20
  -8  10   1   -5.60    9.40
   8  10  -1    9.80   10.00
   8  10  -1   18.20   12.50
   6 -10  -1   26.80    8.80
   6 -10  -1   55.29   11.70
   6 -10  -1   20.30   15.60
  -6 -10   1   37.90   11.80
  -6 -10   1   37.80    8.30
   6  10  -1   33.30   11.10
   6  10  -1   27.10   11.30
  -6  10   1   23.60   11.20
   4 -10  -1    5.20   12.00
   4 -10  -1    8.10    7.60
   4 -10  -1  -12.10    8.00
  -4 -10   1  -15.10    8.90
   4  10  -1    1.80    9.10
   4  10  -1    4.40    8.50
  -4  10   1    6.90    9.20
   2 -10  -1   35.00   10.60
  -2 -10   1   28.50   11.20
   2 -10  -1   16.40   16.40
  -2 -10   1   35.40   10.80
   2  10  -1   47.80   11.50
   2  10  -1   36.70   11.10
  -2  10   1   56.59   12.40
   0 -10  -1    9.00    9.00
   0 -10   1   12.30    7.60
   0 -10  -1   13.80    8.50
   0 -10   1   -7.30    9.50
   0  10   1   23.10   10.60
   0  10  -1   23.20   10.40
   0  10  -1   37.80   11.40
   2 -10   1   40.10   11.10
   2 -10   1   21.20   10.90
  -2 -10  -1   27.70    9.90
   2 -10   1   24.90    8.50
  -2 -10  -1   20.00    8.60
  -2  10  -1   23.30   10.70
   2  10   1   25.70    9.80
   2  10   1   34.60   12.00
  -2  10  -1   23.20   10.10
   4 -10   1   28.30    8.70
  -4 -10  -1    3.40   15.40
   4 -10   1   48.90   11.80
   4 -10   1   44.50   11.20
   4  10   1   46.10   12.40
   4  10   1   33.40   10.20
   6 -10   1    5.00    6.60
   6 -10   1   17.50    7.70
   6 -10   1   -1.90    9.90
  -6 -10  -1    4.70   11.20
   6  10   1   -8.00    8.80
   6  10   1    7.90    8.60
   8 -10   1   -0.70    6.80
   8 -10   1    8.00    8.00
   8 -10   1    2.80   10.30
   8  10   1   -3.20    9.50
   8  10   1   -1.70    8.10
  10 -10   1   -3.90   10.10
  10 -10   1   -7.50    9.90
  10 -10   1  -11.40    6.30
  10  10   1   -6.00    7.90
  12 -10   1   -1.00    6.60
  12 -10   1   14.30   13.50
  12 -10   1  -10.80   11.20
  12  10   1    8.60   11.00
  12  10   1    1.90    9.00
 -12  10  -1   -0.60    6.90
  14 -10   1  262.67   33.70
  14 -10   1  202.08   22.10
  14  10   1  236.28   30.10
 -14  10  -1  226.88   21.50
  14  10   1  208.38   22.40
  16 -10   1   44.70   17.60
  16 -10   1   46.30   11.70
  16  10   1   58.19   12.50
  16  10   1   55.39   14.70
  18  10   1   99.29   17.80
  18  10   1  120.59   24.50
  19 -11  -1  143.59   23.70
  17 -11  -1  102.19   20.90
  17 -11  -1   71.99   16.40
  17  11  -1  126.79   17.20
  17  11  -1  153.38   26.60
  15 -11  -1  162.48   23.00
  15 -11  -1  193.48   28.30
  15  11  -1  171.88   19.60
  15  11  -1  217.98   28.80
  13 -11  -1    3.10   13.60
  13 -11  -1   17.70    9.90
  13  11  -1   53.59   21.60
  13  11  -1   35.10   10.60
  11 -11  -1    4.00    8.60
  11 -11  -1    7.50   11.10
  11  11  -1   10.60    8.80
  11  11  -1    1.40    9.70
   9 -11  -1    3.30    8.30
   9 -11  -1   24.50   10.40
   9  11  -1   14.90   10.70
   9  11  -1   10.90    8.70
  -7 -11   1  227.88   19.20
   7 -11  -1  225.48   23.90
   7 -11  -1  231.68   21.80
   7  11  -1  224.08   21.30
   7  11  -1  174.58   25.20
   5 -11  -1  253.97   22.40
  -5 -11   1  174.68   20.80
   5 -11  -1  269.17   24.10
   5  11  -1  235.18   26.30
   5  11  -1  215.78   22.10
  -5  11   1  222.18   24.10
   3 -11  -1   22.10    9.60
  -3 -11   1    4.90   10.60
   3 -11  -1   47.30   11.10
  -3 -11   1   46.20   11.00
  -3  11   1   34.20   11.90
   3  11  -1   31.60   11.30
   3  11  -1   34.00   10.60
  -1 -11   1  138.79   23.40
  -1 -11   1  209.28   19.80
   1 -11  -1  194.48   20.40
   1 -11  -1  185.88   20.60
  -1  11   1  183.38   21.70
   1  11  -1  150.38   24.10
   1  11  -1  202.68   22.60
  -1 -11  -1   29.50   10.60
  -1 -11  -1   39.00   14.30
   1 -11   1   20.20   12.60
   1 -11   1   53.29   12.20
  -1  11  -1   39.30   12.70
  -1  11  -1   44.00   12.50
   1  11   1   45.30   13.00
   1  11   1   61.79   12.70
   3 -11   1   86.59   15.40
  -3 -11  -1   75.19   12.90
   3 -11   1   64.29   11.50
  -3 -11  -1   49.90   11.00
   3  11   1   99.59   16.60
  -3  11  -1   72.29   14.50
   3  11   1   63.39   14.70
  -5 -11  -1  146.49   16.10
   5 -11   1  161.48   23.10
   5 -11   1  174.08   18.00
   5  11   1  169.08   19.60
   5  11   1  142.09   24.10
  -7 -11  -1  195.48   19.10
   7 -11   1  231.98   20.60
   7 -11   1  197.58   25.70
   7 -11   1  180.48   21.40
  -7 -11  -1  209.68   16.90
   7  11   1  209.58   25.70
   7  11   1  176.68   20.90
   9 -11   1  166.38   18.90
   9 -11   1  159.08   24.20
   9 -11   1  111.59   19.60
   9  11   1  158.78   19.00
   9  11   1  165.48   23.80
  11 -11   1  -14.80    8.00
  11 -11   1  -11.40   11.80
  11 -11   1   -0.70    7.60
  11  11   1   -2.90    9.90
  11  11   1   -0.20    9.50
  13 -11   1  -12.40   17.60
  13 -11   1   -9.00    8.70
  13  11   1   -6.90    9.40
 -13  11  -1    2.00    8.30
  13  11   1   -6.10   11.60
  15 -11   1   26.20   10.00
  15 -11   1   22.80   16.60
  15 -11   1   13.50   10.40
  15  11   1   33.10   11.30
  15  11   1   17.10   12.20
  17 -11   1   -3.00   16.90
  17 -11   1   13.70   11.40
  17  11   1   37.10   15.00
  16 -12  -1  345.27   35.80
  16 -12  -1  264.57   30.60
  16  12  -1  312.57   35.40
  16  12  -1  279.27   26.30
  14 -12  -1  529.75   41.70
  14 -12  -1  575.44   47.00
  14  12  -1  448.26   37.10
  14  12  -1  513.65   44.90
  12 -12  -1  131.09   20.50
  12  12  -1  132.69   18.40
  12  12  -1  148.09   25.10
  10 -12  -1  -17.20   11.70
  10 -12  -1   -0.80    9.00
  10  12  -1  -15.50   16.50
  10  12  -1   15.50    9.80
   8 -12  -1  173.58   19.60
   8 -12  -1  113.39   22.00
   8  12  -1  114.19   23.70
   8  12  -1  162.88   19.50
   6 -12  -1  364.46   29.30
   6 -12  -1  328.47   31.20
  -6  12   1  303.47   31.00
   6  12  -1  346.77   29.40
   6  12  -1  367.86   33.80
  -4 -12   1  422.56   34.40
   4 -12  -1  464.05   35.00
  -4 -12   1  422.36   34.00
   4 -12  -1  453.35   35.80
  -4  12   1  462.95   37.00
   4  12  -1  485.65   35.90
   4  12  -1  424.66   38.10
  -2 -12   1  133.99   17.10
  -2 -12   1  115.19   18.70
   2 -12  -1  122.59   17.50
  -2  12   1  143.79   19.40
   2  12  -1  115.89   21.60
   2  12  -1  104.19   18.50
   0 -12   1   -1.60    9.50
   0 -12  -1   12.60    8.30
   0 -12   1    4.20    6.60
   0 -12  -1   -3.80    7.00
   0  12   1   -7.40    8.80
   0  12  -1    1.20    9.40
   2 -12   1  106.79   15.80
  -2 -12  -1  148.19   17.40
  -2 -12  -1  163.78   19.10
   2 -12   1  171.78   21.80
   2  12   1  115.69   22.80
   2  12   1  129.39   19.00
  -2  12  -1  155.68   20.60
   4 -12   1  725.03   53.09
  -4 -12  -1  656.63   47.60
   4 -12   1  671.93   48.40
  -4 -12  -1  806.02   51.39
   4  12   1  670.93   50.09
   4  12   1  778.72   55.19
   6 -12   1  418.56   38.20
   6 -12   1  461.75   32.90
  -6 -12  -1  399.56   30.40
  -6 -12  -1  417.86   32.60
   6  12   1  414.16   38.70
   6  12   1  414.66   33.70
   8 -12   1  513.65   37.40
   8 -12   1  510.15   43.50
   8  12   1  480.65   37.90
   8  12   1  472.65   49.99
  10 -12   1  254.87   35.80
  10 -12   1  282.17   25.60
  10  12   1  282.67   32.00
  10  12   1  256.07   26.10
  12 -12   1  147.89   20.60
  12  12   1  155.78   26.90
  12  12   1  163.28   21.20
  14 -12   1    3.30   18.10
  14 -12   1   11.10   10.50
  14 -12   1    6.60   11.60
  14  12   1   20.80   11.30
  14  12   1   12.70   15.20
  13 -13  -1   91.19   16.40
  13 -13  -1   68.89   20.60
  11 -13  -1    4.10   10.90
  11 -13  -1   -9.30   13.50
  11  13  -1   13.20   11.20
  11  13  -1   -6.60   12.10
   9 -13  -1   62.59   13.40
   9 -13  -1   87.19   29.30
   9  13  -1   25.90   13.20
   9  13  -1   53.59   13.90
   7 -13  -1   43.80   11.20
   7 -13  -1   28.70   14.70
  -7 -13   1   57.69   11.70
   7  13  -1   47.00   13.30
   7  13  -1   48.30   15.40
  -5 -13   1  274.37   26.50
   5 -13  -1  308.37   27.20
  -5 -13   1  225.08   25.80
   5 -13  -1  277.37   28.50
   5  13  -1  264.27   31.40
   5  13  -1  318.67   28.70
  -5  13   1  343.27   34.20
  -3 -13   1  -19.30    9.50
   3 -13  -1    8.30   10.20
   3 -13  -1    5.30    8.20
  -3 -13   1   -0.30    7.90
   3  13  -1   -7.70   10.00
   3  13  -1   -1.90   10.50
  -3  13   1   -0.80   10.00
   1 -13  -1   -0.90    7.90
  -1 -13   1   -6.90    6.60
   1  13  -1  -14.00   10.00
   1  13  -1   -2.10    8.90
  -1  13   1   -3.80   10.50
   1 -13   1  197.58   19.80
   1 -13   1  139.99   24.20
  -1 -13  -1  205.18   22.40
  -1 -13  -1  161.48   20.80
   1  13   1  172.88   26.40
  -1  13  -1  189.88   24.20
   1  13   1  193.98   22.80
   3 -13   1   23.80   12.80
   3 -13   1   34.60    9.80
  -3 -13  -1   36.90   11.00
  -3 -13  -1   19.70   10.20
   3  13   1   21.40   12.10
   3  13   1   13.20   12.20
  -5 -13  -1  286.87   27.50
   5 -13   1  273.97   30.90
   5 -13   1  302.27   25.80
  -5 -13  -1  242.48   24.50
   5  13   1  281.17   27.30
  -7 -13  -1  247.28   25.70
  -7 -13  -1  220.08   24.30
  -7 -13  -1  233.48   22.10
   7 -13   1  210.08   31.50
   7 -13   1  280.67   24.60
   7  13   1  178.28   30.10
   7  13   1  242.18   25.20
   9 -13   1  116.19   18.20
   9 -13   1   65.19   23.00
   9  13   1  138.89   20.60
  11 -13   1   36.40   18.90
  11 -13   1   58.09   13.30
  11  13   1   50.99   15.90
  11  13   1   72.19   14.60
  13 -13   1   -0.20   10.80
  10 -14  -1   -8.10   11.50
  10 -14  -1  -18.30   13.30
  10  14  -1   21.00   14.10
   8 -14  -1   40.80   16.20
  -8 -14   1   66.09   14.00
   8 -14  -1   66.79   14.50
   8  14  -1   55.79   15.80
   8  14  -1   59.99   15.00
  -6 -14   1   68.39   13.80
  -6 -14   1   33.90   12.00
   6 -14  -1   39.40   13.00
   6 -14  -1   64.39   16.80
   6  14  -1   50.99   14.20
   6  14  -1   64.89   16.00
   4 -14  -1   80.49   17.10
  -4 -14   1  147.79   20.30
   4 -14  -1   80.39   15.30
  -4 -14   1   53.59   14.80
   4  14  -1  105.79   19.10
  -4  14   1  108.89   19.00
   4  14  -1  101.69   17.90
  -2 -14   1   39.70   14.50
   2 -14  -1   65.89   15.60
   2 -14  -1   72.89   14.40
  -2 -14   1   95.99   15.00
   2  14  -1   65.59   15.70
  -2  14   1   97.49   17.50
   2  14  -1   81.59   28.10
   0 -14   1   45.00   11.20
   0 -14  -1   23.90   10.90
   0 -14  -1   34.30   13.00
   0 -14   1   -1.00   13.00
   0  14  -1   19.50   14.70
  -2 -14  -1  -11.80   10.10
  -2 -14  -1   12.00   10.90
   2 -14   1    5.10    8.90
   2  14   1   20.10   12.80
  -4 -14  -1    9.70   10.50
   4 -14   1   11.30    9.30
   4 -14   1   -7.70   14.10
  -4 -14  -1   17.30   10.90
   4  14   1   14.50   13.10
   4  14   1   35.40   13.60
   6 -14   1  -16.10    9.50
  -6 -14  -1   -8.70   12.70
  -6 -14  -1   -4.10   11.10
   6  14   1    7.20   12.10
   6  14   1  -19.30   11.50
   8 -14   1   10.10   10.70
  -8 -14  -1   11.50   11.70
   8  14   1   -7.50   13.10
   8  14   1   -2.20   11.50
  -1 -15   1  112.09   19.80
   1 -15  -1   87.69   16.50
  -1 -15  -1   -3.30   10.30
   1 -15   1    6.90   10.70
  28   0  -2  -13.20   11.30
  26   0  -2   -4.60   10.60
  26   0  -2  -10.20   12.80
  24   0  -2 1034.10   66.69
  24   0  -2  933.31   67.19
  22   0  -2  504.85   41.10
  22   0  -2  618.64   40.80
  22   0  -2  497.45   37.00
  20   0  -2 1736.13   99.29
  20   0  -2 1312.97   94.89
  20   0  -2 1531.05   96.29
  18   0  -2 1030.90   60.89
  18   0  -2  893.61   61.49
  18   0  -2  879.71   60.79
  16   0  -2  517.55   36.40
  16   0  -2  564.24   36.00
  16   0  -2  491.05   36.80
 -16   0   2  508.35   37.20
 -14   0   2   27.70    6.90
  14   0  -2   32.90    7.30
  14   0  -2   30.40    6.10
  12   0  -2  266.87   20.50
  12   0  -2  270.37   19.40
 -12   0   2  268.87   20.60
 -10   0   2  240.48   18.00
  10   0  -2  239.68   16.80
  10   0  -2  237.48   17.90
   8   0  -2  269.07   16.30
   8   0  -2  244.98   17.50
  -8   0   2  235.08   17.50
   6   0  -2   44.80    5.50
  -6   0   2   54.79    5.70
   6   0  -2   42.70    4.10
  -4   0   2 7786.42  476.25
   4   0  -2 8618.34  476.75
  -2   0   2 2949.51  168.48
  -2   0   2 2725.63  167.58
  -2   0   2 2961.30  167.38
  -2   0  -2 6312.47  363.56
   2   0   2 6191.38  362.66
   4   0   2 2716.23  150.58
  -4   0  -2 2636.64  150.48
  -4   0  -2 2474.85  151.28
   4   0   2 2481.85  151.38
   6   0   2 1938.11  114.99
  -6   0  -2 2063.59  115.79
  -6   0  -2 1881.71  113.99
   6   0   2 1876.81  114.99
  -8   0  -2  321.07   22.10
   8   0   2  344.97   21.60
   8   0   2  295.47   22.30
  -8   0  -2  319.27   21.90
 -10   0  -2  117.79   11.30
  10   0   2  114.79   12.60
  10   0   2  107.39   11.40
 -10   0  -2  115.79   11.70
 -12   0  -2  703.33   45.00
  12   0   2  685.53   44.00
 -12   0  -2  684.83   44.40
  12   0   2  681.33   45.00
 -14   0  -2  288.07   23.00
  14   0   2  292.57   23.00
 -14   0  -2  310.97   24.10
  14   0   2  301.17   24.50
 -16   0  -2  105.39   16.80
  16   0   2  108.59   17.60
  16   0   2  102.89   15.40
 -16   0  -2  121.09   22.70
  18   0   2   -2.10   10.20
  18   0   2   -3.80    7.70
  20   0   2  233.48   26.90
  20   0   2  233.68   23.50
  22   0   2  449.76   37.00
  22   0   2  523.15   41.20
  24   0   2 1436.66   84.19
  24   0   2 1051.29   79.09
  26   0   2  424.76   36.10
  27  -1  -2   49.90   15.80
  27  -1  -2   47.00   14.30
  27   1  -2   30.00   13.40
  27   1  -2   29.90   12.90
  25  -1  -2   67.79   14.80
  25  -1  -2   91.19   17.90
  25   1  -2  113.39   21.60
  25   1  -2  113.39   20.90
  23  -1  -2 1428.86   94.79
  23   1  -2 1484.55   95.89
  23   1  -2 1545.25   94.09
  21  -1  -2  483.75   39.80
  21  -1  -2  604.14   41.20
  21  -1  -2  467.85   36.50
  21   1  -2  597.84   38.70
  21   1  -2  510.95   40.60
  19  -1  -2  492.45   40.30
  19  -1  -2  499.15   36.00
  19  -1  -2  414.46   36.10
  19  -1  -2  536.15   38.20
  17  -1  -2  249.58   22.90
  17  -1  -2  252.17   22.40
  17  -1  -2  259.07   20.30
  17   1  -2  248.38   21.20
 -17   1   2  266.87   23.60
 -15  -1   2   41.70    8.50
  15  -1  -2   27.60    7.60
  15  -1  -2   37.60    7.10
  15  -1  -2   37.00    8.10
  15   1  -2   27.50    7.20
 -15   1   2   44.40    8.80
  15   1  -2   27.70    8.30
  13  -1  -2  239.28   19.80
  13  -1  -2  257.67   21.50
  13  -1  -2  308.27   21.30
 -13  -1   2  267.37   21.70
  13   1  -2  324.47   21.90
  13   1  -2  289.47   20.00
  13   1  -2  289.07   22.70
 -13   1   2  237.48   21.50
  11  -1  -2  401.16   24.60
  11  -1  -2  308.17   24.40
  11  -1  -2  331.77   23.20
 -11  -1   2  367.16   25.00
  11   1  -2  400.66   25.10
 -11   1   2  289.97   24.50
  11   1  -2  350.96   23.10
  11   1  -2  361.56   25.60
   9  -1  -2  135.09   12.50
  -9  -1   2  171.38   12.90
  -9   1   2  141.79   12.60
   9   1  -2  164.28   12.60
   9   1  -2  144.79   10.80
   7  -1  -2   68.29    7.60
   7  -1  -2   59.39    6.30
  -7  -1   2   80.49    7.30
  -7   1   2   61.29    7.40
   7   1  -2   77.39    7.30
   5  -1  -2  120.89    9.50
   5  -1  -2  143.99   10.30
  -5  -1   2  142.29   10.00
   5   1  -2  139.19    9.90
  -5   1   2  134.19    9.60
  -5   1   2  133.29   10.10
   3  -1  -2 1107.29   63.89
  -3  -1   2 1022.10   63.39
  -3  -1   2 1049.70   63.69
   3   1  -2 1070.09   63.59
  -3   1   2 1066.19   64.09
   3   1  -2 1062.49   63.49
  -3   1   2 1188.48   63.89
  -1  -1   2  681.43   43.40
   1  -1  -2  688.43   43.50
   1  -1  -2  728.33   43.60
  -1  -1   2  766.52   42.80
  -1   1   2  787.72   43.70
  -1   1   2  729.53   43.50
   1   1  -2  764.52   42.80
   1   1  -2  696.43   43.40
  -1  -1  -2 4538.65  251.97
  -1  -1  -2 4314.47  252.07
   1   1   2 4342.87  252.07
  -1   1  -2 4162.78  251.97
   1   1   2 4281.27  251.97
   3  -1   2 8131.59  511.85
  -3  -1  -2 9076.19  511.65
  -3  -1  -2 8337.67  511.55
   3   1   2 9999.00  512.95
  -3   1  -2 8170.28  511.75
  -3   1  -2 8619.24  510.85
   3   1   2 9327.27  512.45
   5  -1   2 1969.20  120.99
  -5  -1  -2 2176.38  120.59
  -5  -1  -2 1996.90  120.29
   5   1   2 1921.21  120.39
  -5   1  -2 2104.09  119.99
   5   1   2 2165.48  120.59
  -5   1  -2 1956.40  120.99
   7  -1   2  619.24   34.50
   7  -1   2  546.95   36.20
   7   1   2  524.35   35.30
   7   1   2  512.55   35.20
  -7   1  -2  554.64   35.70
  -7   1  -2  596.14   35.20
   9  -1   2   56.09    7.30
  -9  -1  -2   67.19    8.10
  -9  -1  -2   53.29    8.20
   9  -1   2   47.40    8.10
   9   1   2   57.69    8.70
  -9   1  -2   47.50    8.30
   9   1   2   49.99    8.90
  -9   1  -2   44.40    7.00
  11  -1   2   66.29    8.80
  11  -1   2   59.19    9.30
 -11  -1  -2   40.30    7.40
 -11  -1  -2   64.79    8.80
  11   1   2   54.99    9.70
 -11   1  -2   73.59    9.10
  11   1   2   41.90    7.60
 -11   1  -2   55.49    8.20
  13  -1   2   68.79   11.40
  13  -1   2   71.69   10.80
 -13  -1  -2   85.39   11.00
 -13   1  -2   89.39   11.60
  13   1   2   99.89   13.20
 -13   1  -2   66.09   11.60
  13   1   2   96.49   12.70
 -15  -1  -2  131.89   16.40
  15  -1   2  121.09   19.70
 -15  -1  -2  143.69   15.20
 -15   1  -2  186.88   17.10
  15   1   2  145.69   17.30
 -15   1  -2  167.08   16.70
  15   1   2  119.79   16.40
  17  -1   2   -1.20   10.00
  17   1   2   -5.60    9.00
  17   1   2   -8.50    8.00
  19  -1   2   30.90    9.20
  19  -1   2   45.70   12.80
  19   1   2   44.80   12.60
  19   1   2   22.70   12.60
  21  -1   2  388.46   35.90
  21   1   2  418.46   35.40
  21   1   2  404.46   33.80
  23  -1   2  456.75   45.50
  23  -1   2  449.86   39.70
  23   1   2  424.86   36.00
  23   1   2  428.06   38.60
  25  -1   2  264.87   31.60
  25   1   2  221.08   26.50
  25   1   2  245.98   29.90
  26  -2  -2   -1.20    9.80
  26  -2  -2   -2.40   13.00
  26   2  -2    0.10   10.60
  26   2  -2   -4.60    9.90
  24  -2  -2   48.80   14.30
  24   2  -2   53.09   17.20
  24   2  -2   50.99   14.00
  22  -2  -2   43.90   11.00
  22  -2  -2   42.50   12.30
  22  -2  -2   67.99   14.80
  22   2  -2   64.89   11.10
  20  -2  -2  179.58   23.30
  20  -2  -2  139.49   19.50
  20  -2  -2  163.68   17.40
  20   2  -2  183.98   22.50
  20   2  -2  205.88   18.80
  18  -2  -2  197.88   18.80
  18  -2  -2  190.68   22.50
  18  -2  -2  177.78   19.80
  18   2  -2  208.48   18.50
  18   2  -2  235.58   23.20
  16  -2  -2  349.17   28.40
  16  -2  -2  333.67   26.70
  16  -2  -2  412.36   29.90
 -16  -2   2  394.86   29.70
  16   2  -2  400.06   30.40
  16   2  -2  346.57   26.40
 -16   2   2  384.36   29.40
 -14  -2   2  398.86   29.00
  14  -2  -2  354.56   27.30
  14  -2  -2  362.36   26.20
  14  -2  -2  389.56   27.90
  14   2  -2  410.76   29.50
  14   2  -2  325.57   25.30
 -14   2   2  371.26   27.70
  12  -2  -2  107.09   11.90
  12  -2  -2  127.59   13.60
  12  -2  -2  123.89   13.10
 -12  -2   2  147.69   13.70
  12   2  -2  136.29   15.30
  12   2  -2   94.39   10.80
 -12   2   2  143.99   14.00
  10  -2  -2  751.12   47.10
 -10  -2   2  774.12   48.20
  10  -2  -2  824.42   48.50
 -10   2   2  835.72   48.50
  10   2  -2  700.03   48.60
  10   2  -2  685.53   46.50
   8  -2  -2 1074.29   64.59
   8  -2  -2 1176.48   65.89
  -8  -2   2 1065.99   65.29
  -8   2   2 1097.99   65.49
   8   2  -2  957.00   65.69
   6  -2  -2  646.44   42.90
   6  -2  -2  742.73   43.30
  -6   2   2  774.22   42.90
   6   2  -2  633.44   43.60
  -4  -2   2 6580.54  388.36
   4  -2  -2 6667.43  388.96
  -4  -2   2 5990.80  389.06
   4  -2  -2 6986.80  388.86
  -4  -2   2 6869.41  387.36
  -4   2   2 6928.21  388.76
  -4   2   2 6891.01  388.86
   4   2  -2 6625.14  389.16
   4   2  -2 6599.64  387.36
   2  -2  -2   42.30    4.60
  -2  -2   2   47.90    4.60
  -2  -2   2   48.40    3.80
  -2  -2   2   41.50    5.10
   2  -2  -2   48.10    5.40
   2   2  -2   52.79    4.40
   2   2  -2   49.50    5.40
  -2   2   2   41.70    5.00
  -2   2   2   44.60    4.50
   0  -2  -2  442.96   28.60
   0  -2  -2  439.06   28.60
   0  -2   2  510.15   29.50
   0  -2   2  472.55   27.90
   0   2   2  464.15   28.60
   0   2  -2  482.65   27.80
   0   2   2  430.56   28.70
   0   2  -2  428.76   28.10
   2  -2   2 1065.19   63.89
  -2  -2  -2 1015.60   63.19
   2  -2   2 1106.69   62.09
  -2  -2  -2 1055.99   63.79
   2   2   2 1082.09   64.09
  -2   2  -2 1041.70   63.49
   4  -2   2  524.95   31.40
  -4  -2  -2  455.85   29.90
  -4  -2  -2  464.15   31.80
   4  -2   2  506.65   29.90
  -4   2  -2  504.95   30.60
   4   2   2  450.45   29.90
   4   2   2  451.85   30.80
  -4   2  -2  487.95   29.30
   6  -2   2 1154.98   73.69
  -6  -2  -2 1216.38   74.19
   6  -2   2 1234.28   75.69
  -6  -2  -2 1385.46   75.59
  -6   2  -2 1266.27   73.99
  -6   2  -2 1194.88   74.99
   6   2   2 1127.89   74.09
   6   2   2 1353.96   75.49
  -8  -2  -2  519.15   36.00
   8  -2   2  579.94   37.10
   8  -2   2  550.54   34.70
   8   2   2  557.14   36.10
  -8   2  -2  575.24   35.00
   8   2   2  521.25   35.00
  -8   2  -2  545.95   35.80
 -10  -2  -2 2377.06  145.49
  10  -2   2 2608.94  147.89
  10  -2   2 2597.84  144.59
 -10  -2  -2 2142.39  146.39
  10  -2   2 2503.55  145.69
  10   2   2 2434.86  146.59
  10   2   2 2329.27  145.59
 -10   2  -2 2658.73  146.19
 -10   2  -2 2467.05  146.59
  12  -2   2  797.82   49.70
 -12  -2  -2  705.23   46.30
 -12   2  -2  726.53   47.60
 -12   2  -2  758.92   47.40
  12   2   2  679.53   46.70
 -14  -2  -2  625.14   41.40
 -14   2  -2  710.03   43.30
  14   2   2  555.24   42.50
  14   2   2  643.34   42.20
  16  -2   2  755.92   49.60
  16  -2   2  767.12   45.50
 -16  -2  -2  652.03   45.40
  16   2   2  597.84   45.90
 -16   2  -2  681.93   47.00
  18  -2   2  118.99   21.10
  18  -2   2  110.09   14.90
  18   2   2   74.99   13.00
  20  -2   2  125.39   17.20
  20  -2   2  180.18   24.70
  20   2   2  120.19   20.50
  20   2   2  151.08   25.80
  22  -2   2  174.48   26.10
  22   2   2  154.28   22.60
  22   2   2  146.39   23.00
  24  -2   2   67.49   16.90
  24   2   2   77.99   15.60
  24   2   2   73.39   15.60
  27  -3  -2   -7.80   10.60
  27   3  -2   -2.50   13.60
  27   3  -2  -16.90   14.10
  25  -3  -2   -3.20   12.90
  25  -3  -2  -10.00    9.40
  25   3  -2    2.60   12.00
  25   3  -2   -4.60    8.50
  23  -3  -2   22.30   11.80
  23  -3  -2   61.09   15.30
  23  -3  -2   34.30   10.70
  23   3  -2   55.39    9.90
  23   3  -2   43.50   12.90
  21  -3  -2  428.66   34.50
  21  -3  -2  317.47   30.40
  21   3  -2  373.56   27.30
  21   3  -2  327.97   31.50
  19  -3  -2  425.46   32.90
  19  -3  -2  335.17   29.50
  19   3  -2  358.76   31.20
  19   3  -2  346.57   26.40
  17  -3  -2   73.99   13.30
  17  -3  -2   57.29   12.10
  17  -3  -2   79.29   12.30
  17   3  -2   55.89   10.80
 -17   3   2   85.99   13.90
  17   3  -2   83.19   16.30
  15  -3  -2   16.60   10.60
  15  -3  -2   61.99   10.00
 -15  -3   2   40.30    8.70
 -15   3   2   71.19   11.70
  15   3  -2   39.40    6.10
  15   3  -2   17.20    9.60
  13  -3  -2 1038.20   63.99
 -13  -3   2  943.61   70.99
  13  -3  -2  939.81   62.29
  13  -3  -2 1082.29   63.99
 -13   3   2 1016.10   63.69
 -11  -3   2 1109.29   68.99
  11  -3  -2 1118.69   68.99
  11  -3  -2 1077.09   67.79
  11  -3  -2 1259.67   69.49
  11   3  -2  954.50   69.09
 -11   3   2 1138.09   68.89
   9  -3  -2 5172.68  291.97
  -9  -3   2 5013.30  292.47
   9  -3  -2 5008.90  292.67
  -9   3   2 4887.11  292.27
   9   3  -2 4852.71  292.97
   7  -3  -2 5403.96  309.47
   7  -3  -2 5311.47  309.87
  -7  -3   2 4953.40  310.57
  -7  -3   2 5573.14  309.77
  -7   3   2 5351.36  309.67
   7   3  -2 5123.19  307.67
   7   3  -2 5421.26  310.47
  -7   3   2 5239.88  309.57
   5  -3  -2 8008.70  454.55
  -5  -3   2 7655.13  455.35
   5  -3  -2 7856.11  454.65
  -5  -3   2 7647.23  453.05
  -5   3   2 8153.68  454.65
   5   3  -2 7814.12  454.95
   5   3  -2 7644.94  452.85
  -5   3   2 7665.53  454.35
  -3  -3   2    2.30    2.10
   3  -3  -2    6.10    2.40
   3  -3  -2    2.70    3.50
  -3  -3   2    6.90    2.30
  -3  -3   2    8.90    4.00
   3   3  -2    8.70    2.00
   3   3  -2    5.20    2.60
  -3   3   2    6.50    2.40
   3   3  -2    4.10    3.10
  -3   3   2    5.40    3.20
  -1  -3   2 2725.03  166.58
   1  -3  -2 3010.70  168.48
  -1  -3   2 2829.32  166.08
   1  -3  -2 2693.93  166.88
  -1  -3   2 2936.91  167.08
   1  -3  -2 2936.41  168.38
   1   3  -2 2860.71  166.68
   1   3  -2 2668.73  166.08
  -1   3   2 2942.71  167.08
   1  -3   2 1454.05   77.69
   1  -3   2 1127.39   76.29
   1  -3   2 1280.57   78.29
  -1  -3  -2 1366.36   78.79
   1  -3   2 1345.87   77.69
   1   3   2 1350.26   78.19
   1   3   2 1297.27   78.79
  -1   3  -2 1229.38   77.59
  -3  -3  -2 2474.35  143.99
   3  -3   2 2389.06  143.99
   3  -3   2 2558.84  141.99
   3  -3   2 2543.35  142.09
  -3  -3  -2 2221.78  142.59
  -3   3  -2 2350.16  143.19
   3   3   2 2453.95  143.49
  -3   3  -2 2459.85  141.79
   3   3   2 2413.16  144.09
  -5  -3  -2  840.72   49.90
  -5  -3  -2  740.93   47.70
   5  -3   2  781.12   49.90
   5  -3   2  819.52   47.50
  -5   3  -2  737.43   48.60
   5   3   2  765.02   47.80
   5   3   2  819.02   49.80
  -5   3  -2  795.12   47.40
   7  -3   2   77.79    7.50
  -7  -3  -2   72.39    8.00
   7  -3   2   60.79   11.60
  -7  -3  -2   86.89   10.90
   7   3   2   58.79    8.00
  -7   3  -2   60.99    8.90
   7   3   2   71.89   10.60
   9  -3   2  926.61   57.39
   9  -3   2  900.71   54.29
  -9  -3  -2  819.92   56.19
  -9   3  -2  877.41   55.49
  -9   3  -2  917.41   54.49
   9   3   2  896.61   56.09
   9   3   2  830.32   53.99
  11  -3   2 2167.58  125.19
  11  -3   2 1965.30  121.99
 -11  -3  -2 2015.40  121.59
 -11  -3  -2 1972.70  123.99
 -11   3  -2 2099.89  122.59
  11   3   2 2184.58  123.99
 -11   3  -2 2046.80  123.39
  11   3   2 1906.71  121.59
 -13  -3  -2 1566.94  107.49
  13  -3   2 1709.53  106.09
 -13  -3  -2 1710.53  105.29
 -13  -3  -2 1726.93  107.59
  13  -3   2 1814.42  104.59
  13   3   2 1735.13  105.59
  13   3   2 1871.21  107.99
 -13   3  -2 1892.21  106.99
  15  -3   2  611.44   44.60
 -15  -3  -2  713.53   45.50
  15  -3   2  754.92   50.49
 -15   3  -2  745.93   49.30
  15   3   2  743.13   49.70
  15   3   2  687.23   46.10
  17  -3   2  174.98   16.30
 -17  -3  -2  132.39   15.10
  17  -3   2  186.18   23.20
 -17   3  -2  138.99   18.20
  17   3   2   97.89   19.60
  17   3   2  134.29   17.30
  19  -3   2  165.48   26.00
  19   3   2  193.38   23.10
  19   3   2  187.08   20.50
  21  -3   2   -8.70    7.50
  21  -3   2    9.70   14.00
  21   3   2   -0.40   12.10
  23  -3   2   21.00    9.70
  23  -3   2   40.60   15.90
  23   3   2   22.70   10.90
  23   3   2   13.80   11.30
  25  -3   2  114.99   17.10
  25  -3   2   70.29   20.60
  25   3   2   80.69   14.90
  26  -4  -2  -26.30   16.00
  26  -4  -2    3.00   10.60
  26   4  -2    0.50   17.30
  24  -4  -2   23.70   12.50
  24  -4  -2   52.49   17.70
  24  -4  -2   27.50   10.00
  24   4  -2   51.39   14.90
  22  -4  -2  141.89   20.90
  22  -4  -2  180.18   26.50
  20  -4  -2  324.67   32.80
  20   4  -2  382.66   32.80
  18  -4  -2   18.70    9.20
  18  -4  -2   28.30   10.60
  18   4  -2   34.10   10.90
  16  -4  -2  111.29   14.30
  16  -4  -2   93.49   16.20
  16  -4  -2   87.69   12.70
 -16   4   2   60.89   11.00
  14  -4  -2  387.16   29.00
 -14  -4   2  413.76   29.80
  14  -4  -2  321.47   29.40
  14   4  -2  365.06   39.10
 -14   4   2  460.45   33.10
  12  -4  -2  370.36   28.40
  12  -4  -2  442.16   28.10
  12  -4  -2  366.56   28.80
  12   4  -2  366.56   26.00
 -12   4   2  401.46   28.30
  12   4  -2  437.56   30.40
  10  -4  -2 1435.76   81.29
 -10  -4   2 1144.79   81.69
  10  -4  -2 1358.56   80.19
 -10  -4   2 1310.27   80.79
 -10   4   2 1285.37   80.29
  10   4  -2 1407.46   78.39
  10   4  -2 1258.77   81.39
   8  -4  -2 1120.19   68.49
  -8  -4   2  999.80   69.69
   8  -4  -2 1140.79   68.89
   8   4  -2 1052.29   69.19
  -8   4   2 1178.88   68.89
   8   4  -2 1237.28   66.59
  -8   4   2 1076.89   68.19
  -6  -4   2 1474.55   78.29
  -6  -4   2 1207.88   80.69
   6  -4  -2 1321.87   79.49
   6  -4  -2 1329.77   79.69
  -6   4   2 1230.98   78.99
  -6   4   2 1375.36   79.69
   6   4  -2 1249.77   79.99
   4  -4  -2  374.46   25.10
  -4  -4   2  389.86   23.50
   4  -4  -2  367.96   25.10
   4  -4  -2  354.46   25.30
  -4  -4   2  419.26   26.80
  -4  -4   2  352.76   23.90
  -4   4   2  392.66   24.80
   4   4  -2  384.96   25.70
  -4   4   2  390.66   25.40
   4   4  -2  351.16   23.80
  -2  -4   2 2298.97  141.19
   2  -4  -2 2257.57  140.69
  -2  -4   2 2744.33  139.99
   2  -4  -2 2225.48  140.49
   2  -4  -2 2350.86  140.89
  -2  -4   2 2284.57  139.89
  -2   4   2 2484.55  140.89
  -2   4   2 2341.27  140.29
   2   4  -2 2462.05  139.99
   2   4  -2 2342.77  140.59
   0  -4   2 2389.36  139.19
   0  -4   2 2445.46  139.29
   0  -4   2 2655.83  138.59
   0  -4  -2 2287.67  139.39
   0  -4  -2 2335.37  139.39
   0  -4  -2 2115.99  138.79
   0   4   2 2129.59  139.79
   0   4   2 2356.96  139.09
   0   4  -2 2449.85  138.79
   2  -4   2 1992.80  113.89
   2  -4   2 2025.60  113.39
  -2  -4  -2 1944.01  115.19
  -2  -4  -2 1831.52  114.59
   2  -4   2 1835.72  114.99
   2  -4   2 1974.80  113.99
  -2   4  -2 1977.50  113.79
   2   4   2 1876.61  114.39
  -2   4  -2 1918.61  114.09
   2   4   2 1859.01  115.49
   4  -4   2  863.11   55.89
  -4  -4  -2  946.51   56.19
  -4  -4  -2  792.02   53.69
   4  -4   2  908.51   53.29
   4  -4   2  908.41   53.49
   4  -4   2  908.41   54.59
  -4   4  -2  884.31   54.69
   4   4   2  873.61   55.99
   4   4   2  868.01   54.89
  -4   4  -2  924.51   53.09
   6  -4   2   95.39    7.80
   6  -4   2  101.59   13.00
  -6  -4  -2   71.59   11.80
   6  -4   2   79.39    9.80
  -6  -4  -2   84.29    8.90
   6  -4   2  104.89    8.60
   6   4   2   73.59   12.00
  -6   4  -2   81.99    9.70
   6   4   2  110.59   11.60
  -6   4  -2   89.89    7.90
  -8  -4  -2  436.86   28.60
   8  -4   2  466.75   29.20
  -8  -4  -2  432.76   31.90
   8  -4   2  482.95   33.10
   8   4   2  441.66   31.80
   8   4   2  433.96   28.70
  -8   4  -2  430.06   28.80
  -8   4  -2  433.66   30.40
 -10  -4  -2 1373.06   93.49
 -10  -4  -2 1450.55   93.99
  10  -4   2 1555.54   91.49
  10  -4   2 1617.64   94.99
  10   4   2 1472.25   90.59
  10   4   2 1589.94   93.79
 -10   4  -2 1545.85   91.39
  12  -4   2 1663.73  107.59
 -12  -4  -2 1737.33  106.79
  12  -4   2 1890.81  111.89
  12   4   2 1877.41  110.19
 -12   4  -2 1834.62  108.09
  12   4   2 1736.53  106.89
 -14  -4  -2  559.24   37.00
  14  -4   2  662.33   44.00
  14  -4   2  542.05   38.50
 -14  -4  -2  558.04   41.30
  14   4   2  512.95   42.50
 -14   4  -2  586.94   39.00
  14   4   2  577.64   37.60
  16  -4   2  352.86   30.70
  16  -4   2  243.98   21.40
 -16  -4  -2  263.07   21.60
  16   4   2  296.47   23.10
 -16   4  -2  320.57   25.00
  16   4   2  302.87   27.60
  18  -4   2   21.30   13.30
  18  -4   2   24.10    7.30
  18   4   2   18.40    8.10
  18   4   2    5.30   10.30
  20  -4   2   -8.20   13.50
  20  -4   2    3.70    6.90
  20   4   2    2.30    7.90
  20   4   2   -9.00   10.10
  22   4   2  150.68   23.90
  22   4   2  140.29   18.60
  24  -4   2   69.29   20.20
  24   4   2   88.39   16.70
  25  -5  -2   31.60   19.10
  25  -5  -2   -2.00   15.70
  25   5  -2   37.60   21.60
  23  -5  -2   46.70   13.60
  23  -5  -2   46.10   17.40
  23   5  -2   67.79   16.70
  21  -5  -2   68.39   14.00
  21  -5  -2  108.19   19.30
  21   5  -2  130.59   22.60
  19  -5  -2   73.89   15.00
  19  -5  -2   48.60   12.50
  19   5  -2   99.09   20.00
  17  -5  -2   20.30   10.20
  17  -5  -2   19.60    9.40
  17   5  -2   33.30   11.00
  17   5  -2   35.80    8.60
  15  -5  -2   15.60    7.30
  15  -5  -2   38.20   10.50
  15  -5  -2   42.40   10.60
 -15   5   2   27.10    7.90
  15   5  -2   32.80    7.50
  15   5  -2   22.30    9.00
  13  -5  -2   24.80    7.20
 -13  -5   2   35.90    8.40
  13  -5  -2   25.60    7.40
  13  -5  -2   32.60    7.40
  13   5  -2   35.30    8.80
  13   5  -2   30.10    6.10
 -13   5   2   39.00    8.30
 -11  -5   2  175.88   24.90
 -11  -5   2  144.89   16.10
  11  -5  -2  168.08   16.30
  11  -5  -2  192.18   16.00
  11   5  -2  132.99   16.70
 -11   5   2  152.78   14.60
  11   5  -2  172.48   12.90
   9  -5  -2  473.35   32.40
   9  -5  -2  468.75   32.30
  -9  -5   2  543.85   35.40
   9   5  -2  421.86   29.80
  -9   5   2  508.45   32.10
   9   5  -2  497.95   33.80
  -9   5   2  412.96   32.20
   7  -5  -2  432.66   29.10
  -7  -5   2  475.65   31.90
  -7  -5   2  377.56   27.80
   7  -5  -2  371.56   28.80
   7   5  -2  446.26   30.30
  -7   5   2  368.26   29.00
  -7   5   2  478.35   28.70
  -5  -5   2  464.45   32.10
   5  -5  -2  441.76   30.30
   5  -5  -2  475.85   30.00
   5  -5  -2  436.06   29.50
  -5  -5   2  360.66   29.90
  -5   5   2  501.05   29.50
   5   5  -2  400.56   28.30
   5   5  -2  493.05   30.90
  -5   5   2  416.76   30.00
  -3  -5   2   36.40    6.60
  -3  -5   2   50.89    8.00
   3  -5  -2   27.30    5.40
  -3  -5   2   37.70    6.70
   3  -5  -2   41.30    7.40
   3  -5  -2   37.00    6.70
  -3   5   2   45.50    7.00
   3   5  -2   34.50    6.60
   3   5  -2   29.40    5.50
  -3   5   2   33.80    6.00
  -1  -5   2  206.68   15.40
   1  -5  -2  204.08   15.30
  -1  -5   2  220.68   16.90
   1  -5  -2  199.08   15.90
   1  -5  -2  188.78   15.50
  -1  -5   2  182.08   14.30
   1   5  -2  181.28   14.80
   1   5  -2  174.58   15.60
  -1   5   2  175.28   16.70
  -1   5   2  197.18   15.50
   1  -5   2  329.87   24.30
   1  -5   2  395.96   24.40
  -1  -5  -2  321.97   24.40
   1  -5   2  318.37   22.80
  -1  -5  -2  359.96   24.60
   1   5   2  370.36   25.90
   1   5   2  374.66   24.10
  -1   5  -2  288.07   23.20
   3  -5   2  229.98   20.00
   3  -5   2  229.78   22.20
   3  -5   2  290.07   18.50
   3  -5   2  234.68   16.80
  -3  -5  -2  275.37   20.30
  -3  -5  -2  256.37   19.60
   3   5   2  237.98   20.50
   3   5   2  259.97   18.90
  -3   5  -2  229.38   18.00
  -5  -5  -2   41.60    6.80
   5  -5   2   23.80    7.10
  -5  -5  -2   32.10    7.30
   5  -5   2   31.10    6.20
   5  -5   2   27.30    4.80
   5  -5   2   42.70    6.80
   5   5   2   31.60    7.70
   5   5   2   33.30    6.60
  -5   5  -2   35.40    5.10
   7  -5   2  215.88   14.40
  -7  -5  -2  232.68   19.90
   7  -5   2  205.38   15.20
   7  -5   2  194.08   16.60
  -7  -5  -2  179.18   14.80
   7  -5   2  178.98   19.20
  -7   5  -2  188.98   14.50
   7   5   2  197.48   18.80
   7   5   2  193.78   17.20
   9  -5   2    6.10    2.90
   9  -5   2   -3.00    4.30
  -9  -5  -2   -2.20    3.70
  -9  -5  -2    5.70    6.20
   9  -5   2    7.40    7.00
   9  -5   2   -2.00    4.20
  -9   5  -2   -0.10    3.80
   9   5   2   -5.10    5.30
   9   5   2    1.20    6.20
 -11  -5  -2  112.19   12.10
  11  -5   2  111.29   13.50
 -11  -5  -2  113.59   16.80
  11  -5   2   96.39   12.20
  11  -5   2  133.39   18.40
  11   5   2  168.08   24.10
  11   5   2  108.69   15.60
 -11   5  -2  120.69   12.50
 -13  -5  -2  108.69   17.20
 -13  -5  -2   83.89   10.60
  13  -5   2   71.29   13.50
 -13   5  -2   74.89   11.40
  13   5   2   92.89   16.20
  13   5   2   63.39   10.90
 -15  -5  -2   41.90    7.10
  15  -5   2   50.39   13.60
  15  -5   2   14.70    8.70
  15   5   2   50.99   11.50
  15   5   2   29.50    7.10
  17  -5   2   36.40   14.40
  17  -5   2   43.90   10.40
  17   5   2   25.30   10.80
 -17   5  -2   29.60   10.00
  17   5   2   23.20    8.00
  19  -5   2    2.60   14.60
  19   5   2   -5.70   10.50
  19   5   2   -9.50    6.70
  21  -5   2   64.29   19.40
  21   5   2   73.69   15.60
  21   5   2   90.79   15.30
  23  -5   2   34.40   19.10
  23   5   2   35.80   14.10
  23   5   2   49.10   10.40
  24  -6  -2   32.00   13.20
  24  -6  -2   30.00   16.50
  24   6  -2   25.70   15.90
  24   6  -2   30.10   11.00
  22  -6  -2   91.69   15.60
  22  -6  -2   66.69   18.20
  22   6  -2   33.20   14.30
  22   6  -2   55.39   11.10
  20  -6  -2  113.09   19.30
  20  -6  -2   91.19   18.40
  20   6  -2  109.89   14.90
  18  -6  -2   80.09   17.00
  18  -6  -2  103.29   18.10
  18   6  -2  113.09   13.70
  16  -6  -2   51.59   12.30
  16  -6  -2   50.49   11.70
 -16   6   2   87.69   15.10
  16   6  -2   72.89   11.30
  16   6  -2   72.29   13.10
  14  -6  -2  444.56   34.90
  14   6  -2  418.06   30.20
 -14   6   2  494.35   33.60
  14   6  -2  480.45   35.80
  12  -6  -2  461.35   33.30
 -12  -6   2  435.06   32.90
  12  -6  -2  452.35   32.30
 -12  -6   2  391.76   35.40
  12  -6  -2  430.76   33.20
  12   6  -2  478.85   34.40
  12   6  -2  473.15   29.50
 -12   6   2  453.85   32.00
  10  -6  -2  752.92   49.99
 -10  -6   2  774.12   52.99
  10   6  -2  744.43   57.69
 -10   6   2  744.53   49.10
  10   6  -2  734.03   47.30
 -10   6   2  863.61   55.29
  -8  -6   2 1028.10   65.99
   8  -6  -2  959.80   62.79
   8  -6  -2  977.10   61.69
   8  -6  -2 1015.00   62.59
   8   6  -2  943.71   60.19
  -8   6   2  947.61   62.69
  -8   6   2 1017.70   61.59
   8   6  -2 1035.60   63.49
  -6  -6   2 1209.88   78.49
   6  -6  -2 1321.47   79.79
   6  -6  -2 1288.67   79.99
   6  -6  -2 1277.67   79.39
  -6  -6   2 1402.56   82.69
   6   6  -2 1256.17   78.09
  -6   6   2 1247.58   79.99
  -6   6   2 1350.96   79.19
   6   6  -2 1330.97   80.59
  -4  -6   2  398.26   30.40
   4  -6  -2  392.26   27.90
  -4  -6   2  478.45   28.00
  -4  -6   2  367.26   26.80
   4  -6  -2  368.96   28.90
   4  -6  -2  407.26   28.20
   4   6  -2  425.56   29.30
  -4   6   2  362.66   27.00
  -4   6   2  379.76   28.60
   4   6  -2  470.65   27.70
   2  -6  -2  189.78   17.10
   2  -6  -2  190.98   16.00
  -2  -6   2  167.88   14.70
  -2  -6   2  196.18   15.90
   2  -6  -2  216.38   15.90
   2   6  -2  145.49   16.20
   2   6  -2  172.38   15.20
  -2   6   2  169.38   16.20
   0  -6  -2 1308.67   79.49
   0  -6   2 1340.67   79.19
   0  -6  -2 1390.46   78.99
   0  -6  -2 1184.88   78.99
   0  -6   2 1088.69   76.79
   0  -6   2 1425.46   79.99
   0  -6   2 1129.69   77.59
   0   6   2 1429.56   79.09
   0   6  -2 1295.67   78.69
   0   6   2 1413.96   81.19
   0   6  -2 1168.48   78.49
   2  -6   2 1661.53  103.59
  -2  -6  -2 1620.74  105.19
  -2  -6  -2 1772.22  105.19
   2  -6   2 1573.34  102.59
   2  -6   2 1732.93  105.39
   2  -6   2 1896.31  104.69
  -2   6  -2 1565.04  103.89
   2   6   2 1798.32  106.49
   2   6   2 1958.90  104.79
  -4  -6  -2  225.48   19.40
   4  -6   2  216.48   20.10
   4  -6   2  233.98   17.40
  -4  -6  -2  207.38   16.90
   4  -6   2  223.38   17.40
   4  -6   2  220.78   16.10
  -4  -6  -2  201.48   19.60
   4   6   2  236.98   18.10
   4   6   2  203.68   20.10
   6  -6   2   63.29   10.60
  -6  -6  -2   68.09   13.10
   6  -6   2   70.39    8.80
   6  -6   2   70.49    8.40
  -6  -6  -2   69.39    9.20
   6  -6   2   70.49    9.60
  -6   6  -2   68.89    7.30
   6   6   2   75.19   10.60
   6   6   2   54.89   10.20
  -8  -6  -2  341.07   22.40
   8  -6   2  311.07   24.20
   8  -6   2  357.66   23.40
  -8  -6  -2  297.77   27.00
  -8   6  -2  286.07   22.10
   8   6   2  372.96   25.40
  10  -6   2  951.20   62.69
  10  -6   2  911.71   60.09
  10  -6   2  819.92   58.99
 -10  -6  -2  923.21   55.99
 -10  -6  -2  837.12   61.69
  10  -6   2  979.00   57.89
  10   6   2 1003.80   59.39
 -10   6  -2  907.91   56.99
  10   6   2  910.51   60.79
  12  -6   2 1167.18   70.49
  12  -6   2 1240.88   76.29
  12   6   2 1161.88   71.79
 -12   6  -2  998.60   69.39
  12   6   2 1072.49   73.19
  14  -6   2  691.53   47.50
  14  -6   2  767.62   54.09
  14   6   2  712.93   49.30
 -14   6  -2  675.23   47.20
  14   6   2  734.93   51.19
  16  -6   2  354.06   34.70
  16  -6   2  294.07   26.20
  16   6   2  295.77   30.20
 -16   6  -2  311.27   26.20
  18  -6   2   19.70    9.40
  18  -6   2   25.50   15.80
  18   6   2   11.90   11.50
  18   6   2   28.50   13.50
  20  -6   2  -12.00   21.70
  20   6   2   15.20   12.60
  22  -6   2   29.10   17.50
  22   6   2    0.50   12.70
  23  -7  -2   78.19   18.30
  23  -7  -2   59.89   15.30
  23   7  -2   51.69   11.30
  23   7  -2   88.09   18.00
  21  -7  -2  111.49   24.50
  21  -7  -2  131.39   20.00
  21   7  -2   86.09   14.40
  21   7  -2   74.39   16.80
  19  -7  -2   48.70   13.20
  19  -7  -2   60.39   13.30
  19   7  -2   48.00   13.70
  19   7  -2   44.90    9.20
  17  -7  -2   31.10   12.40
  17  -7  -2   28.10   10.60
  17   7  -2   37.40   11.80
  17   7  -2   45.50    8.40
  15  -7  -2   12.30   10.40
  15  -7  -2   27.20   10.10
  15   7  -2   44.00    7.70
  15   7  -2   42.00   11.10
 -15   7   2   34.30   10.00
  13  -7  -2  571.14   44.20
 -13   7   2  598.04   41.70
  13   7  -2  656.93   39.90
  13   7  -2  622.84   44.90
  11  -7  -2 2026.40  130.49
  11  -7  -2 2212.38  130.49
  11  -7  -2 2028.60  128.79
  11   7  -2 2301.07  127.59
 -11   7   2 2007.50  129.39
  11   7  -2 2261.17  131.59
   9  -7  -2 3723.13  221.48
   9  -7  -2 3559.24  220.18
  -9  -7   2 3443.86  223.98
   9  -7  -2 3553.24  220.98
  -9   7   2 3670.13  220.18
  -9   7   2 3784.52  221.98
   9   7  -2 4189.28  219.38
   9   7  -2 3861.41  222.38
  -7  -7   2 1779.02  101.89
   7  -7  -2 1591.24  102.49
   7  -7  -2 1685.53  102.79
   7  -7  -2 1651.83  101.99
  -7  -7   2 1663.93  105.69
   7   7  -2 1519.65  104.89
   7   7  -2 1847.12  101.29
  -7   7   2 1699.73  101.79
   5  -7  -2  730.23   48.50
   5  -7  -2  752.12   48.40
  -5  -7   2  703.13   51.19
  -5  -7   2  641.74   46.70
  -5  -7   2  802.92   48.30
  -5   7   2  717.83   47.60
   5   7  -2  797.62   49.99
  -5   7   2  799.12   49.40
   5   7  -2  844.72   48.00
   3  -7  -2   10.70    4.50
  -3  -7   2    6.20    4.50
   3  -7  -2    4.50    4.20
  -3  -7   2   10.50    6.10
   3  -7  -2    9.90    5.80
  -3  -7   2    8.00    4.90
  -3   7   2    2.50    5.20
   3   7  -2    5.00    5.60
   3   7  -2    2.40    4.50
  -1  -7   2  282.67   20.30
  -1  -7   2  287.97   22.30
   1  -7  -2  315.57   22.90
  -1  -7   2  329.87   24.50
   1  -7  -2  287.77   22.90
  -1  -7   2  307.87   21.60
   1  -7  -2  262.97   21.70
   1   7  -2  291.47   22.10
   1   7  -2  280.57   22.80
  -1   7   2  281.97   24.30
  -1   7   2  295.67   22.50
  -1  -7  -2  396.46   29.80
   1  -7   2  471.45   28.80
  -1  -7  -2  428.46   31.40
  -1  -7  -2  478.65   31.70
   1  -7   2  399.86   30.80
   1  -7   2  410.76   31.10
   1  -7   2  506.65   30.20
  -1   7  -2  426.76   30.60
   1   7   2  399.76   30.00
  -1   7  -2  489.35   31.20
   1   7   2  374.86   32.20
   3  -7   2 1061.19   65.39
  -3  -7  -2 1046.70   66.39
   3  -7   2 1124.69   65.09
   3  -7   2  955.20   66.49
   3  -7   2 1050.79   63.89
   3   7   2 1031.00   65.29
  -3   7  -2 1074.19   65.59
   3   7   2 1005.70   67.59
   5  -7   2   84.79    9.50
  -5  -7  -2   74.69   14.00
  -5  -7  -2   72.29    9.70
   5  -7   2   68.09   10.90
   5  -7   2   54.09   10.90
   5   7   2   70.69   11.10
   7  -7   2   24.70    6.40
   7  -7   2   26.90    5.80
  -7  -7  -2   12.10    7.50
   7  -7   2   26.90    5.60
   7  -7   2    2.30    9.90
   7   7   2   21.60    8.50
  -7   7  -2   16.70    4.40
   7   7   2   24.80    7.30
   9  -7   2  229.98   17.10
   9  -7   2  171.08   24.40
   9  -7   2  196.88   17.90
   9   7   2  224.38   23.10
  -9   7  -2  175.58   16.30
   9   7   2  225.48   20.00
  11  -7   2  772.92   54.39
  11  -7   2  901.71   52.89
  11  -7   2  799.02   60.19
  11   7   2  905.11   58.89
  11   7   2  849.12   56.19
 -11   7  -2  861.11   53.89
  13  -7   2  781.32   57.59
  13  -7   2  841.52   64.19
  13  -7   2  973.90   55.99
  13   7   2  889.81   59.99
  13   7   2  982.30   62.79
 -13   7  -2  930.01   57.79
  15  -7   2  843.72   61.49
  15  -7   2  761.32   54.99
 -15   7  -2  929.71   54.49
  15   7   2  678.53   58.49
  15   7   2  879.21   58.79
  17  -7   2  180.88   29.10
 -17   7  -2  209.08   23.70
  17   7   2  195.98   26.00
  17   7   2  211.68   23.90
  19  -7   2   -1.90    8.90
  19  -7   2   34.10   22.10
  19   7   2   22.00   13.20
  19   7   2   37.80   13.10
  21  -7   2   -9.90   15.00
  21   7   2   -3.00   14.60
  21   7   2   -5.90   11.90
  22  -8  -2   27.10   17.80
  22  -8  -2   18.60   12.90
  22   8  -2   13.60    8.80
  22   8  -2   28.50   13.90
  20  -8  -2   35.60   15.90
  20  -8  -2   55.89   13.70
  20   8  -2   52.99   10.00
  18  -8  -2   43.80   12.70
  18  -8  -2   40.30   11.60
  18   8  -2   19.70   13.00
  18   8  -2   33.30    8.50
  16  -8  -2   44.30   11.40
  16  -8  -2   49.40   13.20
  16   8  -2   24.90   11.60
  16   8  -2   37.80    8.40
  14  -8  -2  281.57   26.00
  14  -8  -2  287.27   28.20
  14   8  -2  239.38   21.30
  14   8  -2  294.57   28.50
  12  -8  -2  389.76   34.00
 -12   8   2  473.25   31.60
  12   8  -2  472.65   35.30
  12   8  -2  379.76   29.50
  10  -8  -2  603.24   37.60
  10  -8  -2  479.75   38.20
  10  -8  -2  526.95   38.20
  10   8  -2  536.55   39.30
  10   8  -2  511.15   35.30
 -10   8   2  502.15   38.40
  -8  -8   2  375.66   28.60
   8  -8  -2  410.96   29.00
   8  -8  -2  353.66   29.30
  -8   8   2  384.36   28.00
  -8   8   2  390.26   29.90
   8   8  -2  373.26   27.60
   8   8  -2  417.46   31.30
   6  -8  -2  525.55   37.10
  -6  -8   2  526.55   36.40
   6  -8  -2  536.55   36.40
   6  -8  -2  508.95   36.30
  -6  -8   2  444.96   34.10
  -6  -8   2  543.75   40.40
   6   8  -2  565.94   38.50
  -6   8   2  535.45   37.10
   6   8  -2  553.74   35.70
  -4  -8   2   49.10    8.70
   4  -8  -2   67.39   11.30
  -4  -8   2   48.10    8.90
   4  -8  -2   65.69   10.10
   4  -8  -2   74.59   12.90
  -4  -8   2   60.99   11.00
   4   8  -2   53.69    9.40
  -4   8   2   53.69    9.50
   4   8  -2   56.49   10.90
  -2  -8   2   73.29   13.60
  -2  -8   2   52.09    9.80
   2  -8  -2   55.99    9.60
  -2  -8   2   64.39    9.90
   2  -8  -2   52.79    9.60
   2  -8  -2   90.29   17.00
   2   8  -2   58.19   10.60
   2   8  -2   58.29   10.30
  -2   8   2   80.99   14.30
   0  -8  -2   50.99    9.30
   0  -8  -2   46.70    8.50
   0  -8   2   59.39    8.00
   0  -8   2   40.20    9.00
   0  -8   2   58.49   10.10
   0  -8   2   61.69    9.50
   0  -8  -2   45.80   10.20
   0   8   2   40.70    8.80
   0   8   2   25.40   16.20
   0   8  -2   61.89   10.00
   0   8  -2   64.29   10.00
   2  -8   2  172.78   14.20
   2  -8   2  135.99   17.50
   2  -8   2  157.68   16.80
   2  -8   2  188.68   15.60
  -2  -8  -2  169.28   26.60
  -2  -8  -2  171.98   18.10
  -2   8  -2  180.68   17.00
   2   8   2  145.39   16.00
   4  -8   2  150.48   14.10
   4  -8   2  141.09   19.70
  -4  -8  -2  168.98   20.10
   4  -8   2  195.28   16.30
   4  -8   2  173.18   17.00
  -4  -8  -2  194.78   23.00
   4   8   2  149.29   16.90
   6  -8   2  354.46   24.60
   6  -8   2  310.37   28.80
  -6  -8  -2  291.57   23.40
   6  -8   2  304.87   23.10
   6   8   2  299.07   28.90
   6   8   2  330.07   25.80
   8  -8   2  553.94   45.60
   8  -8   2  648.94   40.50
   8  -8   2  611.24   40.50
  -8   8  -2  571.84   39.10
   8   8   2  629.24   45.60
   8   8   2  623.64   42.20
  10  -8   2  890.71   54.59
  10  -8   2  880.91   55.79
  10  -8   2  784.32   60.79
  10   8   2  827.52   59.89
  10   8   2  871.61   57.49
 -10   8  -2  908.91   54.69
  12  -8   2  936.41   68.59
  12  -8   2  973.00   60.39
  12  -8   2  910.91   61.99
 -12   8  -2 1021.40   61.59
  12   8   2 1046.90   70.39
  12   8   2  958.40   66.79
  14  -8   2  399.96   32.70
  14  -8   2  436.76   41.60
  14  -8   2  501.05   30.90
  14   8   2  440.76   35.10
  14   8   2  470.35   38.70
  16  -8   2  160.88   19.40
  16  -8   2  156.48   28.80
  16   8   2  204.58   23.20
  16   8   2  222.48   27.10
 -16   8  -2  223.68   21.10
  18  -8   2   71.79   20.40
  18   8   2  128.79   24.80
  18   8   2  123.39   20.30
  20  -8   2  -15.10    9.30
  20  -8   2   -8.20   17.20
  20   8   2    9.20   11.80
  20   8   2    1.90   13.70
  21  -9  -2   46.80   18.20
  21  -9  -2   19.50   14.00
  21   9  -2   22.80    8.80
  21   9  -2   49.30   14.10
  19  -9  -2  191.38   22.60
  19  -9  -2  173.98   24.10
  19   9  -2  242.58   28.00
  19   9  -2  170.88   18.10
  17  -9  -2   74.79   16.80
  17  -9  -2  134.29   19.10
  17   9  -2  119.69   22.40
  17   9  -2   94.99   14.00
  15  -9  -2   38.10    8.90
  15  -9  -2   20.20   11.40
  15  -9  -2   21.80   10.50
  15   9  -2   25.50   11.50
  15   9  -2   15.00    8.30
  13  -9  -2   -3.60    7.80
  13  -9  -2   12.50    9.70
  13   9  -2    1.20    9.00
  13   9  -2    4.20    7.50
  11  -9  -2   15.60    8.10
  11  -9  -2   34.50   10.60
  11  -9  -2   19.90    7.50
 -11   9   2   11.70    6.90
  11   9  -2   31.70   10.80
  11   9  -2   32.70    8.70
  -9  -9   2  131.89   17.90
   9  -9  -2  129.39   17.70
  -9   9   2  176.18   15.80
   9   9  -2  135.09   20.10
   9   9  -2  128.99   15.50
  -9   9   2  128.09   18.30
  -7  -9   2   23.50    9.80
   7  -9  -2   46.20    8.50
   7  -9  -2   35.60    8.80
   7  -9  -2   30.90    8.60
  -7   9   2   28.60    9.80
   7   9  -2   27.20    9.10
   7   9  -2   34.30   10.30
   5  -9  -2  447.36   33.30
   5  -9  -2  447.66   33.30
  -5  -9   2  407.86   33.10
   5   9  -2  465.15   32.90
  -5   9   2  465.25   34.10
   5   9  -2  472.75   35.10
   3  -9  -2  141.99   16.30
  -3  -9   2   88.19   15.40
   3  -9  -2  127.99   16.20
  -3  -9   2   82.29   20.10
  -3  -9   2  139.89   18.90
   3   9  -2  114.79   16.60
   3   9  -2  100.19   15.90
  -3   9   2  152.68   16.80
   1  -9  -2 1379.36   81.59
  -1  -9   2 1254.77   78.09
  -1  -9   2 1336.57   80.89
  -1  -9   2 1186.68   76.79
  -1  -9   2 1159.88   78.89
   1  -9  -2 1253.17   79.49
   1  -9  -2 1232.18   79.19
  -1   9   2 1297.77   78.79
   1   9  -2 1187.88   82.79
  -1   9   2 1185.28   80.99
   1  -9   2 1014.30   63.99
   1  -9   2 1012.10   67.29
  -1  -9  -2 1039.80   67.39
   1  -9   2 1039.70   65.39
  -1  -9  -2 1135.19   67.99
   1   9   2  971.00   65.59
   1   9   2 1014.30   69.09
  -1   9  -2 1030.20   66.79
  -1   9  -2  996.20   66.59
   3  -9   2  448.26   40.00
   3  -9   2  455.45   32.90
  -3  -9  -2  411.56   34.40
   3  -9   2  430.26   30.20
   3   9   2  415.56   32.00
  -3   9  -2  446.96   33.00
   3   9   2  421.16   35.70
   5  -9   2  121.99   15.10
  -5  -9  -2   89.89   13.20
   5  -9   2   73.29   14.60
  -5  -9  -2   77.79   15.30
   5  -9   2   98.29   12.00
   5   9   2   86.49   14.90
   5   9   2   79.99   14.70
  -7  -9  -2   42.30    8.50
   7  -9   2   48.70    8.50
   7  -9   2   47.60   13.00
   7   9   2   43.90   10.50
   7   9   2   39.00   11.90
   9  -9   2   95.79   14.60
   9  -9   2   73.79   15.30
   9  -9   2  120.79   14.40
  -9   9  -2  122.79   13.00
   9   9   2   99.29   16.30
   9   9   2   67.89   14.90
  11  -9   2   49.20    9.50
  11  -9   2   58.89   11.50
  11  -9   2   43.80   15.20
 -11   9  -2   57.89    9.40
  11   9   2   30.30   12.00
  11   9   2   43.50   11.20
  13  -9   2  113.39   15.50
  13  -9   2   95.89   18.80
  13  -9   2  149.49   14.20
  13   9   2  138.19   19.00
  13   9   2  114.29   22.60
  15  -9   2   34.90   10.30
  15  -9   2   47.20   18.40
  15   9   2   62.69   15.70
  15   9   2   58.79   12.60
 -15   9  -2   76.79   11.90
  17  -9   2   -4.80    9.00
  17  -9   2    6.00   16.10
  17   9   2   -1.40   16.20
  17   9   2   12.40   10.90
  19  -9   2   97.89   18.40
  19  -9   2  180.28   31.30
  19   9   2  128.39   26.00
  19   9   2  159.28   20.90
  20 -10  -2  288.87   31.90
  20 -10  -2  356.96   36.80
  20  10  -2  270.77   23.80
  20  10  -2  315.47   34.20
  18 -10  -2  337.27   31.90
  18  10  -2  282.07   24.70
  18  10  -2  344.57   33.70
  16 -10  -2  112.79   20.30
  16 -10  -2  172.98   31.60
  16  10  -2  114.59   25.40
  16  10  -2   94.79   14.70
  14 -10  -2  -14.00    8.80
  14 -10  -2  -13.40    8.40
  14  10  -2  -14.00    7.20
  14  10  -2    3.60   10.20
  12 -10  -2  129.09   18.90
  12 -10  -2  117.29   17.30
  12  10  -2  105.99   14.70
  12  10  -2   78.59   15.20
  10 -10  -2  402.76   31.90
  10 -10  -2  431.86   32.50
 -10  10   2  332.07   33.00
  10  10  -2  434.66   29.90
  10  10  -2  377.86   34.30
 -10  10   2  368.26   36.10
   8 -10  -2   58.19   11.00
   8 -10  -2   91.59   14.90
  -8 -10   2   67.29   17.40
  -8  10   2   52.39   12.80
   8  10  -2   94.29   13.80
   8  10  -2   66.19   13.70
   6 -10  -2  175.58   20.60
  -6 -10   2  192.98   18.80
  -6 -10   2  217.38   22.10
   6 -10  -2  237.28   21.10
   6  10  -2  185.18   23.60
   6  10  -2  236.58   23.80
  -6  10   2  168.38   22.20
  -4 -10   2  444.16   34.40
  -4 -10   2  402.06   34.20
   4 -10  -2  506.05   35.60
   4  10  -2  521.75   35.30
   4  10  -2  431.16   36.50
  -4  10   2  476.85   35.80
  -2 -10   2  665.43   48.80
  -2 -10   2  634.04   47.10
  -2 -10   2  603.84   45.70
   2 -10  -2  798.32   49.10
   2  10  -2  802.42   49.20
  -2  10   2  706.73   48.40
   2  10  -2  678.23   49.20
   0 -10   2 1350.96   93.29
   0 -10   2 1628.84   94.99
   0 -10  -2 1561.14   92.89
   0 -10   2 1370.56   90.19
   0  10   2 1496.55   95.89
   0  10   2 1465.45   92.19
   0  10  -2 1521.75   93.49
   0  10  -2 1381.56   93.09
   2 -10   2 1535.55   98.79
  -2 -10  -2 1641.74  101.29
   2 -10   2 1602.44  102.69
   2 -10   2 1713.43  102.29
   2  10   2 1658.03  104.59
   2  10   2 1552.24  100.49
  -2  10  -2 1636.04  102.19
   4 -10   2  969.50   66.29
   4 -10   2  976.10   61.69
   4 -10   2  977.90   63.89
   4  10   2  980.50   63.29
   4  10   2  923.11   66.79
   6 -10   2  494.25   44.00
   6 -10   2  465.55   38.60
  -6 -10  -2  435.86   32.80
   6 -10   2  463.65   33.00
   6  10   2  448.86   34.40
   6  10   2  431.56   38.30
  -8 -10  -2   53.69    9.20
   8 -10   2   33.20    8.60
   8 -10   2   30.70   12.80
   8  10   2   45.90   11.30
   8  10   2   36.00   12.50
  10 -10   2   11.90    7.40
  10 -10   2   18.30    7.60
  10 -10   2   21.70   12.20
  10  10   2   -1.90   11.00
  10  10   2   -0.90    8.50
  12 -10   2  197.38   19.30
  12 -10   2  221.08   20.40
  12 -10   2  206.48   28.80
 -12  10  -2  220.38   27.10
  12  10   2  232.78   23.00
  12  10   2  175.88   27.10
  14 -10   2   98.29   14.00
 -14  10  -2   84.99   13.10
  14  10   2  114.19   18.90
  14  10   2   89.79   21.80
  16 -10   2   16.30   10.00
  16 -10   2   18.90   16.40
  16 -10   2    3.10    6.90
  16  10   2   31.80   11.40
  16  10   2   33.00   14.40
  18 -10   2  -14.20   17.10
  18  10   2   -8.20   10.50
  18  10   2    1.10   12.50
  19 -11  -2  296.47   34.20
  19 -11  -2  231.78   30.30
  19  11  -2  302.57   33.70
  19  11  -2  259.37   23.70
  17 -11  -2  196.48   27.80
  17  11  -2  189.78   21.70
  17  11  -2  149.69   27.90
  15 -11  -2   -0.10   11.80
  15 -11  -2    1.20   11.40
  15  11  -2    0.20   10.40
  15  11  -2   15.30   12.40
  13 -11  -2   30.90   11.40
  13 -11  -2   16.10   11.60
  13  11  -2   23.60   14.00
  13  11  -2   41.50   16.90
  11 -11  -2  182.18   21.60
  11 -11  -2  211.58   22.90
  11  11  -2  155.68   24.00
  11  11  -2  156.28   19.10
   9 -11  -2  165.28   20.20
   9 -11  -2  186.78   20.70
  -9 -11   2  124.79   21.60
   9  11  -2  171.68   23.60
   9  11  -2  175.68   18.80
  -7 -11   2  197.38   23.60
  -7 -11   2  164.58   18.40
   7 -11  -2  240.28   23.10
   7 -11  -2  202.18   21.20
  -7  11   2  216.88   24.40
   7  11  -2  240.98   25.90
   7  11  -2  245.58   21.70
   5 -11  -2   18.70    8.90
   5 -11  -2   21.80    8.20
   5  11  -2   15.90    9.20
  -5  11   2    8.90    9.80
   5  11  -2    0.00    9.10
  -3 -11   2  238.68   26.30
  -3 -11   2  203.28   22.30
   3 -11  -2  299.57   24.50
   3 -11  -2  329.47   26.30
   3  11  -2  221.58   26.90
   3  11  -2  319.37   26.20
  -3  11   2  261.27   25.70
   1 -11  -2  557.54   41.10
  -1 -11   2  582.84   39.30
  -1  11   2  573.24   41.50
   1  11  -2  572.54   42.40
   1  11  -2  511.35   42.70
   1 -11   2  717.63   54.69
   1 -11   2  796.62   50.89
  -1 -11  -2  773.42   53.19
  -1  11  -2  755.82   54.29
   1  11   2  742.63   56.49
   1  11   2  809.12   52.99
   3 -11   2  606.14   42.00
  -3 -11  -2  640.54   44.60
   3 -11   2  622.24   47.10
   3  11   2  595.84   48.30
   3  11   2  606.44   43.90
  -5 -11  -2  368.16   30.10
   5 -11   2  374.46   31.60
   5 -11   2  361.86   35.40
   5 -11   2  437.06   29.50
   5  11   2  387.06   31.10
   5  11   2  332.37   34.90
   7 -11   2  105.09   18.80
   7 -11   2  137.99   15.60
  -7 -11  -2  121.39   16.70
   7 -11   2   88.39   17.60
   7  11   2  108.99   18.10
   9 -11   2  -10.20   12.60
   9 -11   2   -2.00    8.10
   9 -11   2   -4.90    6.90
   9  11   2    1.50    9.00
   9  11   2   -3.30   10.00
  11 -11   2   12.10   13.00
  11 -11   2   -9.10   14.10
  11 -11   2   25.50    9.40
  11  11   2   37.30   18.30
  11  11   2   13.30   10.50
  13 -11   2    7.20   14.90
  13 -11   2   17.80    9.50
  13 -11   2   20.40    9.60
 -13  11  -2   37.70    9.90
  13  11   2   42.70   12.20
  13  11   2   20.60   12.50
  15 -11   2  -26.40   16.70
  15 -11   2   -0.50    9.70
  15 -11   2   -5.40    8.10
  15  11   2   -0.90   12.10
  15  11   2    9.00   11.40
  17 -11   2   45.00   11.80
  17 -11   2   34.60   18.60
  17  11   2   33.70   14.70
  17  11   2   62.69   13.10
  16 -12  -2    6.50   12.80
  16 -12  -2   27.80   16.30
  16  12  -2   14.80   10.50
  16  12  -2   15.60   13.60
  14 -12  -2    1.10   12.20
  14 -12  -2   11.50   13.80
  14  12  -2   12.10   10.70
  14  12  -2    7.60   12.40
  12 -12  -2   15.30   16.10
  12 -12  -2   46.30   12.30
  12  12  -2   33.10   11.20
  12  12  -2   33.80   13.70
  10 -12  -2   36.00   11.90
  10 -12  -2   33.10   11.90
  10  12  -2   23.30   15.60
  10  12  -2   23.20   10.30
   8 -12  -2   27.60   11.50
   8 -12  -2   29.20    9.90
   8  12  -2   23.00   10.20
  -8  12   2   13.90   12.00
   8  12  -2    6.60   10.40
   6 -12  -2   62.29   12.20
  -6 -12   2   47.80   11.60
   6 -12  -2   73.39   13.50
   6  12  -2   87.29   15.20
   6  12  -2   60.19   12.60
  -6  12   2   67.79   14.40
   4 -12  -2   55.39   11.10
   4 -12  -2   60.89   13.40
  -4 -12   2   50.89   10.40
  -4  12   2   63.09   13.90
   4  12  -2   68.09   13.50
   4  12  -2   53.79   12.80
  -2 -12   2   -7.30    5.80
   2 -12  -2  -10.70    6.90
   2 -12  -2    4.10    7.30
   2  12  -2   -7.30    8.40
  -2  12   2   -8.70    8.50
   2  12  -2  -20.10    9.50
   0 -12  -2   40.00    9.50
   0 -12   2   37.30    8.70
   0 -12   2   35.10   12.90
   0 -12  -2   30.00   10.50
   0  12  -2   33.50   12.40
   0  12   2   59.69   12.60
   2 -12   2   42.90   17.00
  -2 -12  -2   48.70    9.90
  -2 -12  -2   28.60   10.90
   2 -12   2   35.50   13.80
   2  12   2   64.89   12.60
   2  12   2   20.20   12.50
  -4 -12  -2   90.29   14.10
   4 -12   2   83.79   17.70
   4  12   2  129.19   18.40
   4  12   2   75.19   17.30
  -6 -12  -2   32.50   10.10
   6 -12   2   28.00    8.70
  -6 -12  -2   18.20    6.90
  -6 -12  -2    6.60    9.40
   6 -12   2   25.40   15.00
   6  12   2    4.20   11.20
   6  12   2   11.30   11.50
   8 -12   2    4.10    7.90
  -8 -12  -2    6.30    6.70
   8 -12   2   -3.40   13.90
   8  12   2  -10.40    9.90
   8  12   2   -2.50   16.10
  10 -12   2   -8.40   12.10
  10 -12   2    3.50   22.90
  10  12   2   13.20   11.90
  10  12   2   27.80   13.30
  12 -12   2   29.30   10.40
  12 -12   2   -9.70   15.80
  12 -12   2   -4.40    9.70
  12  12   2   14.40   13.90
  12  12   2   42.80   13.30
  14 -12   2  -13.50   10.00
  14 -12   2   -6.10    9.50
  14 -12   2   -2.70   17.80
  14  12   2   26.60   15.30
  14  12   2   27.00   12.10
  13 -13  -2   34.60   14.00
  13 -13  -2   24.50   15.70
  13  13  -2   20.20   13.50
  13  13  -2   34.00   11.80
  11 -13  -2  190.08   27.70
  11 -13  -2  194.18   26.00
  11  13  -2  185.48   29.00
  11  13  -2  206.48   22.70
   9 -13  -2  245.38   26.40
   9 -13  -2  221.98   33.10
   9  13  -2  227.58   24.80
   9  13  -2  235.88   30.10
   7 -13  -2  157.08   23.60
  -7 -13   2  202.28   21.10
   7 -13  -2  164.68   21.70
  -7  13   2  159.28   24.00
   7  13  -2  173.58   22.20
  -5 -13   2   62.39   12.20
   5 -13  -2   73.29   13.80
   5 -13  -2   44.30   11.10
   5  13  -2   45.90   14.80
   5  13  -2   44.10   13.50
  -5  13   2   35.50   16.70
   3 -13  -2   60.39   13.20
  -3 -13   2   10.90   12.20
   3 -13  -2   45.50   11.40
  -3 -13   2   23.60    8.90
   3  13  -2   30.00   12.40
  -3  13   2   55.69   14.30
   3  13  -2   31.40   13.10
  -1 -13   2  301.27   32.10
   1 -13  -2  379.06   30.50
  -1 -13   2  342.77   28.30
   1 -13  -2  402.26   31.90
   1  13  -2  347.67   33.10
  -1  13   2  347.57   31.60
  -1 -13  -2  265.77   26.40
   1 -13   2  316.47   24.30
   1 -13   2  209.28   29.00
  -1 -13  -2  273.47   24.60
   1  13   2  241.08   26.60
  -3 -13  -2  167.68   17.70
   3 -13   2  107.49   19.30
  -3 -13  -2  139.69   20.50
   3  13   2  121.89   20.20
   3  13   2  106.69   26.20
  -5 -13  -2  112.39   19.80
   5 -13   2   66.09   17.30
  -5 -13  -2   86.49   15.70
  -5 -13  -2   62.49   13.80
   5  13   2   79.89   14.70
   5  13   2   39.60   15.70
  -7 -13  -2   15.50   10.80
   7 -13   2  -26.90   14.20
   7 -13   2    8.80    8.50
  -7 -13  -2   -1.10    7.60
   7  13   2   -9.20   12.90
   7  13   2   14.20   12.00
   9 -13   2   89.99   20.90
   9  13   2   85.39   16.00
  11 -13   2  113.09   23.50
  11 -13   2  184.58   20.90
  11  13   2  158.28   23.00
  11  13   2  190.48   30.10
  10 -14  -2  426.26   38.70
  10 -14  -2  389.66   36.60
  10  14  -2  396.96   34.60
  10  14  -2  385.96   38.90
   8 -14  -2  144.29   24.30
  -8 -14   2  152.08   21.40
   8 -14  -2   93.09   17.40
   8  14  -2  157.78   26.60
   8  14  -2  133.79   21.90
   6 -14  -2    4.70   10.30
  -6 -14   2  -11.10   10.60
  -6 -14   2   10.30   10.00
   6 -14  -2   14.10   12.50
   6  14  -2   18.30   13.10
   6  14  -2    4.50   12.90
  -6  14   2   17.70   13.30
  -4 -14   2   42.90   11.80
  -4 -14   2   13.50   12.80
   4 -14  -2   36.10   12.60
   4 -14  -2   33.20   13.00
  -4  14   2   63.89   15.80
   4  14  -2   44.20   14.50
   4  14  -2   56.99   15.50
  -2 -14   2  134.29   18.30
   2 -14  -2  132.39   20.60
   2 -14  -2  101.79   17.90
  -2 -14   2   78.79   17.30
   2  14  -2  104.99   21.40
  -2  14   2  156.88   22.50
   0 -14  -2  415.66   32.90
   0 -14  -2  322.77   30.30
   0 -14   2  320.57   33.80
   0 -14   2  316.67   28.50
   0  14   2  353.36   35.00
  -2 -14  -2  215.88   23.90
   2 -14   2  252.37   23.60
  -2 -14  -2  229.98   26.70
   2  14   2  246.78   37.20
  -4 -14  -2  155.88   24.90
  -4 -14  -2  167.98   19.90
   4 -14   2  165.28   20.00
   4  14   2  161.28   25.20
   6 -14   2    3.90    9.30
  -6 -14  -2   20.00   12.80
   6 -14   2  -27.50   20.70
  -6 -14  -2   25.70   12.60
   6  14   2   -8.60   13.20
   6  14   2   13.10   12.50
   8 -14   2  -15.60   14.10
  -8 -14  -2   15.70   11.10
   8 -14   2    6.30    9.10
   8  14   2   -2.40   13.50
   8  14   2   10.40   12.20
  28   0  -3   28.60   14.10
  28   0  -3   34.50   14.70
  26   0  -3    0.90   10.80
  26   0  -3  -21.20   12.00
  24   0  -3   44.30   14.00
  24   0  -3   72.39   14.10
  24   0  -3   76.79   13.50
  22   0  -3   -2.50    8.90
  22   0  -3    6.80    9.50
  22   0  -3    9.90    6.90
  20   0  -3   23.10    6.90
  20   0  -3   21.70    9.40
  20   0  -3   -1.80    9.10
  20   0  -3   -5.50    9.00
  18   0  -3    4.50    5.20
  18   0  -3  -10.10    7.30
  18   0  -3   -7.20    7.60
  18   0  -3    4.40    6.90
  16   0  -3   36.00    6.10
  16   0  -3   29.80    7.50
  16   0  -3   32.80    8.30
 -16   0   3   20.20    7.50
  14   0  -3   11.80    6.00
  14   0  -3   10.10    4.30
  14   0  -3    9.10    5.10
 -14   0   3   12.80    5.80
 -12   0   3   -7.00    3.50
  12   0  -3   -2.60    3.40
  12   0  -3   -2.10    4.10
 -10   0   3   24.00    5.40
  10   0  -3   31.90    5.70
  10   0  -3   17.60    3.80
   8   0  -3    8.70    3.70
   8   0  -3    9.00    2.40
  -8   0   3    8.20    3.40
  -6   0   3   19.00    3.10
   6   0  -3   21.20    3.50
   6   0  -3   31.70    4.70
   4   0  -3   81.79    6.10
  -4   0   3   76.99    6.50
  -4   0   3   73.59    5.80
   4   0  -3   75.39    6.40
  -2   0   3   35.00    3.60
   2   0  -3   38.30    3.60
   2   0  -3   38.00    4.40
   0   0   3   48.00    5.40
   0   0  -3   51.49    5.40
   0   0  -3   45.10    4.00
  -2   0  -3   48.60    6.30
  -2   0  -3   43.60    4.40
   2   0   3   45.30    6.50
   4   0   3   13.00    4.00
   4   0   3   15.70    2.80
  -4   0  -3   18.40    2.90
  -6   0  -3  328.07   21.50
   6   0   3  331.27   23.30
   6   0   3  354.46   22.20
  -6   0  -3  331.67   22.80
  -8   0  -3  807.62   49.99
   8   0   3  798.02   49.60
   8   0   3  780.22   50.99
  -8   0  -3  845.52   50.79
  10   0   3  108.99   13.30
 -10   0  -3  111.69   12.00
 -10   0  -3   99.59   11.10
  10   0   3  105.19   11.20
 -12   0  -3   26.70    6.40
  12   0   3   28.60    6.60
 -12   0  -3   32.40    7.00
  12   0   3   20.90    7.60
  14   0   3  154.58   16.30
 -14   0  -3  167.08   17.10
 -14   0  -3  160.18   17.00
  14   0   3  176.88   19.40
  16   0   3  344.87   32.90
 -16   0  -3  343.27   26.40
  16   0   3  275.67   25.30
  18   0   3  139.69   21.20
  18   0   3  109.69   17.20
  20   0   3  174.38   23.70
  20   0   3  119.99   18.70
  22   0   3   63.69   15.90
  22   0   3   29.70   13.20
  24   0   3   -3.30   10.60
  24   0   3   -0.50   14.00
  27  -1  -3   87.79   17.90
  27   1  -3   72.69   14.80
  25  -1  -3  269.57   29.50
  25  -1  -3  283.97   29.20
  25   1  -3  217.88   26.10
  25   1  -3  230.88   21.20
  23  -1  -3   46.30   11.90
  23   1  -3   71.99   14.80
  23   1  -3   54.59   12.50
  21  -1  -3   38.80    8.50
  21  -1  -3   14.70   10.50
  21  -1  -3   18.20   10.30
  21   1  -3   31.80    9.60
  21   1  -3   27.50   11.20
  21   1  -3   40.80    7.90
  19  -1  -3  167.98   16.70
  19  -1  -3  159.98   19.20
  19  -1  -3  192.88   27.20
  19   1  -3  181.48   18.20
  19   1  -3  152.68   21.20
  19   1  -3  180.28   15.80
  17  -1  -3  518.55   34.50
  17  -1  -3  445.86   31.90
  17  -1  -3  524.65   35.00
  17   1  -3  471.65   32.60
  17   1  -3  407.86   33.80
 -17   1   3  481.65   35.70
  15  -1  -3 1987.40  114.79
 -15  -1   3 1858.51  114.89
  15  -1  -3 1878.01  112.39
  15  -1  -3 2009.80  113.69
 -15   1   3 2037.10  115.69
  15   1  -3 1632.84  114.39
  15   1  -3 1607.44  117.89
  15   1  -3 1998.90  112.49
  13  -1  -3 1736.13  110.39
 -13  -1   3 1850.01  112.59
  13  -1  -3 1996.10  112.69
 -13   1   3 1891.11  112.89
  13   1  -3 1724.03  111.79
  13   1  -3 1942.71  110.39
 -11  -1   3  893.31   54.09
  11  -1  -3  848.82   53.79
  11  -1  -3  842.92   52.09
  11   1  -3  836.32   53.39
 -11   1   3  851.11   53.99
   9  -1  -3  399.96   24.10
   9  -1  -3  332.77   24.90
  -9  -1   3  393.26   25.40
   9   1  -3  396.46   25.20
  -9   1   3  364.36   25.20
   9   1  -3  343.87   22.60
   7  -1  -3  804.92   48.80
   7  -1  -3  814.62   49.90
  -7  -1   3  821.12   49.70
  -7   1   3  806.62   48.60
  -7   1   3  801.12   49.80
   7   1  -3  810.92   49.40
   5  -1  -3 1254.87   73.99
  -5  -1   3 1266.67   73.69
   5  -1  -3 1115.59   73.19
  -5   1   3 1229.88   73.99
   5   1  -3 1201.98   73.49
  -5   1   3 1177.28   73.19
   5   1  -3 1421.36   73.39
   3  -1  -3 1830.52  112.69
  -3  -1   3 1981.30  112.19
  -3  -1   3 1913.61  112.49
   3  -1  -3 1887.71  112.49
  -3   1   3 1885.01  112.69
  -3   1   3 1994.40  113.29
   3   1  -3 1894.01  112.09
   3   1  -3 1938.51  112.49
  -1  -1   3  169.68   11.10
  -1  -1   3  191.58   13.30
   1  -1  -3  186.88   12.20
   1  -1  -3  177.88   12.60
  -1   1   3  183.78   12.00
   1   1  -3  171.68   11.10
   1   1  -3  174.68   12.40
  -1   1   3  183.68   12.70
   1  -1   3 1028.30   63.69
  -1  -1  -3 1058.29   63.59
  -1  -1  -3 1096.09   63.29
   1   1   3 1061.39   63.59
  -1   1  -3 1057.49   63.59
   3  -1   3  252.07   18.40
  -3  -1  -3  273.87   17.40
  -3  -1  -3  260.87   17.90
   3   1   3  256.77   17.40
   3   1   3  244.18   17.90
   5  -1   3 3126.29  190.18
  -5  -1  -3 3373.06  189.28
   5   1   3 3106.09  189.68
  -5   1  -3 3231.28  188.58
  -5   1  -3 3102.29  189.78
   5   1   3 3424.16  189.58
   7  -1   3 1274.77   78.49
  -7  -1  -3 1282.87   77.59
  -7   1  -3 1292.17   76.89
   7   1   3 1358.56   77.59
  -7   1  -3 1282.97   77.99
   7   1   3 1207.28   77.69
  -9  -1  -3 3436.16  200.68
   9  -1   3 3434.86  199.38
   9  -1   3 3298.67  201.78
  -9  -1  -3 3368.96  200.88
   9   1   3 3627.54  200.98
  -9   1  -3 3317.27  201.28
   9   1   3 3310.87  201.08
  -9   1  -3 3447.76  200.48
 -11  -1  -3  868.01   56.79
  11  -1   3  918.21   58.19
  11  -1   3  931.11   55.39
 -11  -1  -3  854.01   56.59
  11   1   3  853.01   56.99
  11   1   3  929.81   56.79
 -11   1  -3  972.90   56.89
 -11   1  -3  884.11   57.09
  13  -1   3  189.28   20.00
 -13  -1  -3  177.28   17.70
 -13  -1  -3  186.18   17.50
  13  -1   3  206.08   16.60
 -13   1  -3  215.88   18.40
  13   1   3  174.58   17.90
  13   1   3  208.48   19.10
 -15  -1  -3    5.20    9.30
  15  -1   3   15.10   10.10
  15  -1   3   29.80    7.30
 -15  -1  -3   23.30    7.20
 -15   1  -3   23.30    7.80
  15   1   3   29.60    9.40
  15   1   3   11.90    7.80
 -15   1  -3   24.00    8.60
  17  -1   3   72.39   13.90
  17  -1   3   55.99   14.00
 -17  -1  -3   83.69   13.70
  17   1   3   47.40   11.00
  19  -1   3  655.23   44.90
  19  -1   3  688.33   49.80
  19   1   3  635.74   47.70
  21  -1   3  392.56   35.10
  21  -1   3  357.16   28.80
  21   1   3  311.67   32.70
  23  -1   3   33.60   11.10
  23  -1   3   58.29   16.40
  23   1   3   48.50   15.60
  23   1   3   47.50   13.20
  25  -1   3   41.80   17.10
  25  -1   3    8.20    9.90
  25   1   3   18.40   12.10
  25   1   3    6.80   14.40
  28  -2  -3   -1.30   11.20
  28  -2  -3    7.00   14.70
  28   2  -3    5.10   15.10
  28   2  -3   -5.10   10.80
  26  -2  -3  268.87   30.50
  26   2  -3  224.38   22.20
  26   2  -3  269.17   30.50
  26   2  -3  294.07   26.00
  24  -2  -3  179.18   24.80
  24  -2  -3  117.09   21.90
  24  -2  -3  117.19   20.20
  24   2  -3  136.99   18.90
  24   2  -3  127.49   18.30
  24   2  -3  129.99   23.00
  22  -2  -3   -9.10    8.10
  22  -2  -3  -11.70   10.00
  22   2  -3    4.20    5.90
  22   2  -3  -12.70    7.90
  22   2  -3   -0.20    9.10
  20  -2  -3   99.89   17.30
  20  -2  -3  106.99   19.60
  20  -2  -3  128.69   15.80
  20   2  -3  153.48   20.60
  20   2  -3  120.79   16.00
  18  -2  -3 1168.28   70.69
  18  -2  -3  984.40   71.69
  18  -2  -3 1047.00   70.79
  18   2  -3 1179.08   72.49
  18   2  -3 1136.79   68.39
  16  -2  -3 2356.16  148.29
  16  -2  -3 2675.93  148.29
  16  -2  -3 2487.95  146.69
 -16   2   3 2405.16  148.69
  16   2  -3 2361.76  145.49
  14  -2  -3 3357.26  189.18
  14  -2  -3 3037.70  190.28
  14  -2  -3 3241.48  189.98
  14   2  -3 3052.49  187.58
  14   2  -3 3301.17  191.48
 -14   2   3 3201.88  190.88
  12  -2  -3 3624.94  200.68
 -12  -2   3 3447.35  202.08
  12  -2  -3 3418.76  201.98
  12   2  -3 3226.48  198.98
 -12   2   3 3349.26  201.88
  12   2  -3 3374.86  202.48
 -10  -2   3  640.54   43.20
  10  -2  -3  697.53   43.80
  10  -2  -3  742.33   42.60
  10   2  -3  645.04   44.20
  10   2  -3  673.63   43.00
 -10   2   3  667.63   43.50
   8  -2  -3  175.28   14.80
   8  -2  -3  196.88   14.10
  -8  -2   3  211.48   14.70
   8   2  -3  192.98   16.00
   8   2  -3  211.28   14.60
  -8   2   3  164.78   13.60
  -8   2   3  180.58   14.70
  -6  -2   3 7037.60  458.35
   6  -2  -3 9005.50  457.15
   6  -2  -3 7622.84  456.05
   6   2  -3 7499.35  456.25
   6   2  -3 7598.24  454.35
  -6   2   3 8024.00  455.45
  -6   2   3 7889.51  456.05
   6   2  -3 7956.30  455.35
  -4  -2   3 1072.39   61.19
  -4  -2   3 1049.30   62.19
  -4  -2   3 1038.90   61.99
   4  -2  -3 1038.20   62.99
   4  -2  -3 1077.49   62.99
   4   2  -3 1019.80   61.99
   4   2  -3  942.71   62.99
  -4   2   3 1080.09   63.09
  -4   2   3 1113.59   62.89
   4   2  -3 1034.10   61.89
   2  -2  -3 3606.74  207.98
  -2  -2   3 3624.34  206.58
   2  -2  -3 3438.96  207.78
  -2   2   3 3731.63  207.88
   2   2  -3 3277.87  207.18
  -2   2   3 3650.13  207.78
   2   2  -3 3542.05  207.58
   0  -2  -3  262.37   18.50
   0  -2   3  265.57   18.60
   0  -2  -3  271.57   18.50
   0   2   3  314.77   19.30
   0   2  -3  272.77   17.50
   0   2  -3  272.17   18.30
  -2  -2  -3  144.89   11.10
   2  -2   3  146.59   11.90
  -2  -2  -3  143.49   11.10
   2   2   3  134.39   11.20
   2   2   3  115.19   11.10
  -4  -2  -3  873.21   55.29
  -4  -2  -3  972.20   57.59
   4  -2   3  881.01   56.29
   4   2   3  968.10   56.19
  -4   2  -3  850.11   55.69
  -4   2  -3  969.20   54.19
   4   2   3  859.11   55.29
   6  -2   3 1292.67   79.49
  -6  -2  -3 1262.17   78.59
   6   2   3 1188.68   77.99
  -6   2  -3 1385.06   77.39
   6   2   3 1416.66   79.19
  -6   2  -3 1240.08   78.59
   8  -2   3 3839.32  227.18
  -8  -2  -3 3633.64  225.38
  -8  -2  -3 3883.41  226.38
  -8   2  -3 4001.10  225.28
   8   2   3 3586.04  225.48
  -8   2  -3 3693.33  226.28
   8   2   3 4240.68  226.78
 -10  -2  -3 1340.77   87.19
 -10  -2  -3 1389.66   86.39
  10  -2   3 1469.35   88.69
 -10   2  -3 1532.05   86.69
  10   2   3 1581.44   87.79
 -10   2  -3 1320.87   87.09
  10   2   3 1350.76   86.59
 -12  -2  -3 1557.34   94.89
 -12  -2  -3 1589.24   96.29
  12  -2   3 1480.95   92.89
  12  -2   3 1558.14   97.29
 -12  -2  -3 1518.65   95.79
 -12   2  -3 1586.74   95.19
  12   2   3 1541.35   95.29
  12   2   3 1665.13   96.09
 -14  -2  -3  370.16   27.90
 -14  -2  -3  327.37   25.60
  14  -2   3  330.27   29.30
 -14   2  -3  312.57   26.50
  14   2   3  337.57   27.00
  14   2   3  351.66   27.50
 -14   2  -3  356.96   27.20
  16  -2   3    0.30    6.00
 -16  -2  -3    6.40    7.20
  16  -2   3    5.70   10.00
 -16   2  -3    6.50    7.70
  16   2   3    3.80    9.00
  16   2   3    4.60    9.00
  18  -2   3  689.03   47.50
 -18  -2  -3  584.74   42.00
  18  -2   3  598.84   40.90
  18   2   3  651.73   48.10
  18   2   3  538.95   45.60
  20  -2   3  116.09   16.00
  20  -2   3  151.38   23.90
  20   2   3  126.39   20.30
  20   2   3  111.69   21.40
  22  -2   3   19.30    9.00
  22  -2   3   21.50   14.70
  22   2   3   19.10   11.40
  22   2   3   11.60   12.70
  24  -2   3   11.60   16.60
  24  -2   3    2.40    9.10
  24   2   3    2.50   11.20
  24   2   3  -15.50   11.30
  27  -3  -3   21.90   12.50
  27  -3  -3   22.70   17.20
  27   3  -3   52.49   19.70
  27   3  -3   35.20   12.20
  27   3  -3   48.20   10.70
  25  -3  -3   20.60   11.10
  25  -3  -3   19.90   14.00
  25  -3  -3   15.50   13.40
  25   3  -3   20.00    9.20
  25   3  -3    8.90    8.80
  25   3  -3   23.70   12.70
  23  -3  -3   28.10   13.00
  23  -3  -3   10.70   11.40
  23   3  -3   16.20    7.90
  23   3  -3    6.00   10.30
  21  -3  -3  130.99   19.60
  21  -3  -3  168.48   22.50
  21   3  -3  130.39   22.10
  21   3  -3  130.39   15.70
  19  -3  -3  288.37   27.10
  19  -3  -3  307.17   28.70
  19  -3  -3  329.27   25.40
  19   3  -3  311.27   23.50
  19   3  -3  336.07   29.60
  17  -3  -3  689.83   50.49
  17  -3  -3  749.73   51.39
  17  -3  -3  809.22   52.09
 -17   3   3  874.11   55.69
  17   3  -3  722.43   47.70
  17   3  -3  792.42   53.09
  15  -3  -3  728.43   47.80
  15  -3  -3  732.93   50.19
 -15  -3   3  661.83   47.50
  15  -3  -3  743.13   46.10
  15   3  -3  677.03   43.50
 -15   3   3  718.03   47.60
  13  -3  -3  677.43   43.30
  13  -3  -3  718.53   45.00
 -13  -3   3  663.83   44.80
 -13   3   3  657.73   44.60
  13   3  -3  651.73   45.70
 -11  -3   3 2733.63  164.28
  11  -3  -3 2739.53  164.58
  11  -3  -3 2839.82  163.48
  11   3  -3 2798.22  165.18
 -11   3   3 2685.43  164.28
   9  -3  -3  290.27   20.90
  -9  -3   3  301.37   21.30
   9  -3  -3  312.87   22.00
  -9   3   3  293.77   20.80
  -9   3   3  298.17   21.30
   9   3  -3  257.37   22.30
   7  -3  -3  493.65   32.90
   7  -3  -3  502.75   32.40
  -7  -3   3  524.35   32.40
   7   3  -3  530.15   33.70
  -7   3   3  472.95   32.10
  -7   3   3  493.35   32.60
  -5  -3   3  629.24   39.80
   5  -3  -3  664.73   42.00
   5  -3  -3  685.83   42.00
  -5  -3   3  655.93   41.10
  -5   3   3  668.23   41.70
   5   3  -3  668.73   42.30
  -5   3   3  725.73   41.90
   3  -3  -3 1695.83  103.59
   3  -3  -3 1714.33  103.69
  -3  -3   3 1791.62  102.29
  -3  -3   3 1618.04  101.99
  -3  -3   3 1940.81  105.49
   3   3  -3 1625.44  102.19
  -3   3   3 1860.41  103.69
   3   3  -3 1652.33  103.39
  -3   3   3 1790.02  103.49
   1  -3  -3 1184.08   72.39
  -1  -3   3 1206.78   72.19
   1  -3  -3 1256.87   72.89
  -1  -3   3 1144.69   71.99
   1  -3  -3 1155.68   72.59
   1   3  -3 1257.17   71.79
   1   3  -3 1163.18   71.69
  -1   3   3 1267.87   72.59
   1  -3   3  137.69   11.70
  -1  -3  -3  131.39   11.00
   1  -3   3  125.69   10.10
  -1  -3  -3  140.39   11.60
  -1   3  -3  150.88   11.30
   1   3   3  121.69   12.00
   1   3   3  149.99   12.00
  -1   3  -3  149.49   10.20
  -3  -3  -3  360.16   23.70
   3  -3   3  355.16   24.00
  -3  -3  -3  333.37   22.70
   3   3   3  342.37   24.00
   3   3   3  310.17   22.50
   3   3   3  344.17   23.90
  -3   3  -3  343.57   22.90
   5  -3   3 1796.22  107.99
   5  -3   3 1694.93  104.89
  -5  -3  -3 1814.62  106.39
  -5  -3  -3 1889.91  107.69
   5   3   3 1796.82  107.79
   5   3   3 1701.53  106.19
  -5   3  -3 1823.72  105.09
  -5   3  -3 1775.42  106.99
   7  -3   3 3202.68  203.88
   7  -3   3 3515.65  207.18
  -7  -3  -3 3626.44  205.18
   7   3   3 3848.81  206.98
  -7   3  -3 3465.45  205.88
  -7   3  -3 3445.36  207.08
   7   3   3 3308.67  204.88
  -9  -3  -3 2859.71  158.48
  -9  -3  -3 2649.03  156.18
   9  -3   3 2555.44  158.68
   9   3   3 2379.86  156.08
   9   3   3 2751.12  158.08
  -9   3  -3 2642.94  155.98
  11  -3   3  956.10   63.09
 -11  -3  -3 1064.79   62.39
 -11  -3  -3  992.30   59.69
  11   3   3  974.00   61.69
 -11   3  -3  909.71   59.49
  11   3   3  848.82   59.49
 -13  -3  -3  545.75   41.80
 -13  -3  -3  574.24   41.90
  13  -3   3  667.33   44.60
 -13  -3  -3  584.84   40.00
 -13   3  -3  628.74   40.60
 -13   3  -3  617.84   41.50
  13   3   3  643.34   42.50
  13   3   3  570.74   40.20
 -15  -3  -3  235.18   22.10
  15  -3   3  322.37   28.40
  15   3   3  270.57   23.40
  15   3   3  258.57   28.60
 -15   3  -3  270.37   22.90
  17  -3   3  305.87   29.40
 -17  -3  -3  235.68   21.70
  17   3   3  268.97   23.70
  17   3   3  232.98   25.60
 -17   3  -3  222.78   27.10
  19  -3   3   62.19   15.80
  19   3   3   24.80   11.50
  19   3   3   33.10   11.20
  21  -3   3  174.68   27.20
  21   3   3  139.19   21.80
  23  -3   3   -9.80   19.00
  23   3   3    9.90   10.80
  23   3   3    2.20   12.10
  26  -4  -3  169.88   25.40
  26  -4  -3  215.68   25.00
  26  -4  -3  288.87   45.40
  26   4  -3  185.88   18.60
  24  -4  -3  406.46   36.90
  24  -4  -3  350.86   32.30
  24   4  -3  294.37   33.50
  22  -4  -3  312.27   30.90
  22  -4  -3  255.07   27.30
  22   4  -3  263.07   29.00
  20  -4  -3  166.98   23.20
  20  -4  -3  150.78   21.30
  20   4  -3  174.88   23.00
  18  -4  -3  201.68   22.40
  18  -4  -3  267.47   24.60
  18   4  -3  255.57   25.60
  16  -4  -3  254.27   22.30
  16  -4  -3  221.08   21.20
  16  -4  -3  220.38   19.90
 -16   4   3  238.38   21.20
  16   4  -3  226.98   23.20
  14  -4  -3  190.98   23.30
 -14  -4   3  120.19   15.10
  14  -4  -3  155.18   15.80
  14   4  -3  131.89   20.70
  14   4  -3  131.69   11.80
  12  -4  -3  211.18   17.70
  12  -4  -3  171.08   15.90
 -12  -4   3  186.98   17.20
  12   4  -3  165.28   18.50
 -12   4   3  196.88   16.70
  12   4  -3  184.08   14.50
 -10  -4   3   33.00    6.90
  10  -4  -3   25.20    6.30
  10  -4  -3   23.50    6.10
 -10   4   3   29.70    6.50
 -10   4   3   38.60    6.80
  10   4  -3   25.70    7.00
  -8  -4   3 1330.57   81.59
  -8  -4   3 1198.98   82.89
   8  -4  -3 1341.07   82.39
   8  -4  -3 1402.46   81.99
   8   4  -3 1426.66   79.39
  -8   4   3 1372.66   81.89
  -8   4   3 1280.17   81.69
   8   4  -3 1405.56   82.89
   6  -4  -3 1200.28   71.49
  -6  -4   3 1172.78   70.39
  -6  -4   3 1235.68   69.19
   6  -4  -3 1130.29   71.09
  -6  -4   3 1074.39   71.99
   6   4  -3 1096.49   71.39
  -6   4   3 1157.68   70.79
   6   4  -3 1175.38   70.89
  -6   4   3 1233.28   71.19
  -4  -4   3 3131.79  193.58
   4  -4  -3 3157.78  193.08
  -4  -4   3 3471.05  192.68
   4  -4  -3 3169.28  192.98
  -4  -4   3 3582.04  191.48
   4   4  -3 3266.17  191.48
   4   4  -3 3440.96  191.08
  -4   4   3 3139.19  192.78
  -4   4   3 3251.57  192.78
   4   4  -3 3146.59  192.88
   2  -4  -3 4674.53  290.97
   2  -4  -3 4732.53  290.87
  -2  -4   3 4849.51  291.17
  -2  -4   3 5526.35  289.87
   2  -4  -3 4837.62  291.27
  -2  -4   3 5062.99  290.37
   2   4  -3 4716.13  290.37
   2   4  -3 5130.89  289.77
  -2   4   3 5210.38  291.07
   0  -4  -3 4218.58  255.07
   0  -4   3 4239.38  254.87
   0  -4  -3 4223.88  254.77
   0  -4   3 4483.15  253.97
   0  -4   3 4488.95  254.57
   0  -4  -3 4435.06  255.27
   0   4  -3 4321.37  254.07
   0   4  -3 4338.67  253.87
   0   4   3 4626.04  255.07
   0   4   3 4092.99  255.67
   2  -4   3 1788.72  103.09
  -2  -4  -3 1684.03  104.49
   2  -4   3 1784.62  103.59
   2  -4   3 1709.73  104.79
  -2   4  -3 1699.33  103.59
  -2   4  -3 1680.33  102.59
   2   4   3 1690.53  105.29
   2   4   3 1879.81  104.59
  -4  -4  -3  100.09   11.50
   4  -4   3   93.89    8.40
   4  -4   3   90.59    8.40
  -4  -4  -3   96.79   10.70
   4  -4   3   96.39   12.10
  -4   4  -3  101.39    7.30
  -4   4  -3   94.59    9.70
   4   4   3  101.29   11.50
   4   4   3   73.69   11.80
   6  -4   3  156.68   11.40
  -6  -4  -3  133.49   15.10
   6  -4   3  162.98   16.70
   6   4   3  154.98   15.20
   6   4   3  152.58   13.00
  -6   4  -3  150.88   13.30
   6   4   3  131.19   15.30
  -6   4  -3  155.98   11.20
   8  -4   3  188.88   18.60
   8  -4   3  162.88   12.90
  -8  -4  -3  160.98   13.90
  -8  -4  -3  167.68   17.10
  -8   4  -3  164.98   15.10
  -8   4  -3  173.68   12.90
   8   4   3  150.28   17.00
   8   4   3  150.88   14.10
 -10  -4  -3   46.90    9.60
 -10  -4  -3   41.70    6.80
  10  -4   3   52.59   12.50
  10  -4   3   26.80    5.60
 -10   4  -3   27.90    6.40
 -10   4  -3   40.10    6.50
  10   4   3   33.20    9.20
  10   4   3   21.60    6.20
 -12  -4  -3  109.19   12.10
  12  -4   3  121.99   17.90
  12  -4   3   80.69   11.30
 -12  -4  -3   79.09   19.40
 -12   4  -3   77.79   12.80
  12   4   3   87.29   13.00
  12   4   3   68.19   11.90
 -12   4  -3   83.29   11.50
  14  -4   3   51.19   12.80
 -14  -4  -3   29.80    7.70
 -14  -4  -3    9.10    7.70
 -14   4  -3   23.70    8.00
  14   4   3   17.60    9.10
  14   4   3   38.20    7.80
 -16  -4  -3  589.04   43.20
  16  -4   3  746.73   51.29
  16   4   3  642.14   44.10
  16   4   3  665.53   47.50
 -16   4  -3  651.73   45.10
 -18  -4  -3  368.56   28.50
  18  -4   3  450.45   38.30
  18   4   3  398.56   30.20
  18   4   3  343.97   32.90
  20  -4   3  749.42   54.19
  20   4   3  681.83   45.40
  20   4   3  542.05   47.70
  22  -4   3  260.77   48.10
  22   4   3  228.88   29.00
  22   4   3  178.98   25.80
  24  -4   3   52.19   20.30
  24   4   3   67.99   15.80
  25  -5  -3  656.73   54.29
  25   5  -3  508.55   54.69
  25   5  -3  504.15   37.80
  23  -5  -3  581.74   45.70
  23   5  -3  566.64   47.50
  23   5  -3  618.24   40.40
  21  -5  -3  241.18   27.40
  21  -5  -3  206.48   24.30
  21   5  -3  226.28   26.70
  21   5  -3  212.18   19.30
  19  -5  -3   26.20   11.30
  19  -5  -3   14.00   10.60
  19   5  -3   31.50   12.10
  19   5  -3   45.30    8.60
  17  -5  -3   13.40    9.90
  17  -5  -3    2.40    8.50
  17   5  -3   31.00   11.00
  17   5  -3   25.00    6.80
  15  -5  -3  127.69   16.10
  15  -5  -3  135.49   15.10
  15  -5  -3  141.29   17.40
  15   5  -3  135.59   12.10
 -15   5   3  136.99   16.10
  15   5  -3  137.09   18.90
  13  -5  -3  422.76   29.30
  13  -5  -3  363.06   29.70
 -13  -5   3  398.96   29.80
  13   5  -3  448.16   31.80
 -13   5   3  447.26   37.60
  13   5  -3  355.16   25.50
 -11  -5   3   56.59   10.00
  11  -5  -3   50.39    8.60
  11  -5  -3   55.59    9.70
  11   5  -3   47.30    9.10
 -11   5   3   52.59    8.30
 -11   5   3   48.90    8.40
  11   5  -3   48.40    6.30
   9  -5  -3 1203.08   75.49
  -9  -5   3 1277.77   75.19
   9  -5  -3 1178.28   74.99
  -9  -5   3 1220.88   77.39
  -9   5   3 1173.08   74.99
   9   5  -3 1157.08   72.19
   9   5  -3 1271.37   76.29
  -9   5   3 1248.48   74.89
  -7  -5   3 4767.92  274.37
  -7  -5   3 4484.65  277.87
   7  -5  -3 4666.33  276.37
   7  -5  -3 4650.43  276.57
   7   5  -3 4767.42  276.87
   7   5  -3 4801.82  274.07
  -7   5   3 4616.34  275.87
  -7   5   3 4835.42  276.37
  -5  -5   3 5919.91  332.17
   5  -5  -3 5367.46  330.27
   5  -5  -3 5635.84  330.67
  -5  -5   3 5752.42  328.87
   5  -5  -3 5625.54  330.67
  -5  -5   3 5555.74  328.77
   5   5  -3 5566.24  330.57
  -5   5   3 5677.13  330.07
   5   5  -3 5470.85  328.77
  -5   5   3 5828.32  330.57
   3  -5  -3 4447.75  271.77
  -3  -5   3 4368.76  270.77
   3  -5  -3 4522.05  271.97
   3  -5  -3 4594.14  272.27
  -3  -5   3 4669.13  270.47
  -3  -5   3 4988.40  273.17
  -3   5   3 4600.84  271.47
   3   5  -3 4838.22  271.87
   3   5  -3 4433.86  269.97
   3   5  -3 4540.15  270.77
  -3   5   3 4946.00  272.17
   1  -5  -3 2201.98  133.29
  -1  -5   3 2413.36  133.49
   1  -5  -3 2120.49  132.79
  -1  -5   3 2255.37  131.59
  -1  -5   3 2158.08  132.59
   1  -5  -3 2153.38  132.99
  -1   5   3 2469.95  133.19
   1   5  -3 2108.39  131.29
   1   5  -3 2176.78  132.19
   1  -5   3 1715.93  109.09
   1  -5   3 1919.51  107.89
  -1  -5  -3 1791.42  109.19
  -1  -5  -3 1786.32  109.09
   1  -5   3 1902.61  110.19
   1   5   3 1883.21  108.89
   1   5   3 1739.33  110.09
  -1   5  -3 1688.93  107.59
  -1   5  -3 1859.61  107.79
   3  -5   3   66.69   11.50
   3  -5   3   55.59    8.10
   3  -5   3   73.09    8.90
   3  -5   3   73.29    9.20
  -3  -5  -3   48.00    8.30
  -3  -5  -3   60.89    8.50
   3   5   3   55.29    9.50
  -3   5  -3   42.10    7.80
  -3   5  -3   62.59    8.10
   3   5   3   63.59   10.00
  -5  -5  -3   67.99   11.70
   5  -5   3   68.59    7.20
   5  -5   3   74.79   13.10
   5  -5   3   65.59    9.50
  -5  -5  -3   72.49    8.90
   5   5   3   50.39    9.90
  -5   5  -3   65.09    6.40
   5   5   3   77.49   11.10
  -5   5  -3   70.09    9.10
   7  -5   3  332.37   26.60
  -7  -5  -3  313.77   22.20
   7  -5   3  328.37   21.20
  -7  -5  -3  309.87   25.50
   7  -5   3  334.67   23.70
   7   5   3  318.57   24.20
  -7   5  -3  303.07   23.10
   7   5   3  274.77   25.10
   9  -5   3   45.70    7.90
  -9  -5  -3   49.00    8.80
   9  -5   3   60.79   10.30
   9   5   3   29.70    6.30
  -9   5  -3   47.80    7.60
   9   5   3   37.40    9.50
   9   5   3   55.39   10.20
  -9   5  -3   44.30    8.10
  11  -5   3   -4.80    7.50
  11  -5   3   -6.30    5.10
 -11  -5  -3    1.20    7.30
 -11  -5  -3   -2.80    4.90
  11  -5   3   -3.90    8.50
 -11   5  -3   -3.40    4.90
  11   5   3   -2.60    8.60
  11   5   3   -2.20    4.80
  13  -5   3   53.19   12.50
 -13  -5  -3   77.49   10.90
 -13  -5  -3   85.69   17.30
  13  -5   3   34.70    8.30
  13   5   3   48.50   11.40
 -13   5  -3   56.79   10.00
  13   5   3   63.39   11.70
 -15  -5  -3  721.43   47.80
  15  -5   3  814.92   56.39
  15   5   3  761.02   48.30
 -15   5  -3  640.84   56.79
  15   5   3  765.42   52.99
  17  -5   3 1327.57   82.79
 -17  -5  -3 1061.49   73.09
 -17   5  -3 1192.88   75.89
  17   5   3 1197.58   78.79
  17   5   3 1187.48   74.09
  19  -5   3 1195.88   80.09
  19   5   3 1125.89   70.79
  19   5   3 1055.29   75.49
  21   5   3  533.25   37.20
  21   5   3  497.25   43.30
  23  -5   3   91.29   22.30
  23   5   3  114.29   19.40
  23   5   3   79.09   17.20
  26  -6  -3  323.27   36.80
  26   6  -3  255.97   24.00
  26   6  -3  347.07   35.60
  24  -6  -3  367.26   33.50
  24   6  -3  297.57   37.20
  24   6  -3  382.36   27.20
  22  -6  -3  547.85   42.20
  22  -6  -3  464.85   38.30
  22   6  -3  412.76   31.40
  22   6  -3  427.86   40.40
  20  -6  -3  201.28   25.10
  20  -6  -3  187.18   22.40
  20   6  -3  122.19   23.70
  20   6  -3  141.89   14.70
  18  -6  -3   76.69   15.40
  18  -6  -3   62.89   13.70
  18   6  -3   85.19   10.90
  16  -6  -3  148.49   19.80
  16  -6  -3  161.18   20.20
  16   6  -3  204.08   22.50
  16   6  -3  157.18   14.00
  14  -6  -3   81.89   15.30
  14  -6  -3   84.79   15.00
 -14   6   3  105.69   13.80
  14   6  -3  105.79   17.60
  14   6  -3  105.29   10.20
  12  -6  -3   41.70    8.70
 -12  -6   3   33.00    8.20
  12  -6  -3   45.70    9.10
  12   6  -3   46.50   10.00
  10  -6  -3   98.19   12.50
  10  -6  -3  100.69   12.80
 -10  -6   3   70.69   14.70
 -10  -6   3   95.89   12.60
  10   6  -3   76.79    9.00
 -10   6   3   94.29   11.60
 -10   6   3   97.69   14.50
   8  -6  -3  283.47   22.20
   8  -6  -3  315.07   23.30
  -8  -6   3  323.07   25.40
  -8   6   3  262.97   22.20
   8   6  -3  251.97   19.50
   8   6  -3  305.77   23.50
  -8   6   3  276.57   21.20
  -6  -6   3 1518.55   95.89
   6  -6  -3 1489.15   93.49
  -6  -6   3 1492.35   92.09
   6  -6  -3 1500.45   93.99
   6  -6  -3 1497.05   93.89
  -6   6   3 1520.15   93.19
  -6   6   3 1601.94   94.09
   6   6  -3 1618.54   92.19
   6   6  -3 1601.64   94.39
  -4  -6   3 2875.81  166.48
   4  -6  -3 2681.83  164.58
   4  -6  -3 2640.54  164.98
  -4  -6   3 2977.00  163.38
  -4  -6   3 2598.24  163.08
   4  -6  -3 2610.04  164.58
  -4   6   3 2701.43  163.98
   4   6  -3 2857.11  163.58
   4   6  -3 2813.12  164.78
  -4   6   3 2912.21  164.98
   2  -6  -3 3894.61  246.18
   2  -6  -3 4044.60  246.78
  -2  -6   3 4538.95  245.28
  -2  -6   3 4195.98  247.38
   2  -6  -3 3991.40  246.38
  -2  -6   3 3998.90  245.78
  -2   6   3 4337.17  246.58
   2   6  -3 4434.56  246.28
   0  -6  -3 3056.99  191.58
   0  -6   3 3218.48  192.08
   0  -6   3 3346.57  192.18
   0  -6  -3 3130.79  191.98
   0  -6   3 3241.18  189.48
   0  -6   3 3438.96  190.68
   0  -6  -3 3133.69  192.28
   0   6   3 3452.05  191.88
   0   6  -3 3285.97  191.08
   0   6   3 3033.30  193.18
   2  -6   3 2813.42  174.28
   2  -6   3 3057.19  178.08
   2  -6   3 2881.51  175.68
  -2  -6  -3 3091.69  177.58
  -2  -6  -3 2916.51  177.38
   2   6   3 2978.50  178.78
  -2   6  -3 2896.41  175.78
   2   6   3 3170.58  176.98
  -4  -6  -3  148.59   13.30
   4  -6   3  151.68   17.00
   4  -6   3  159.68   13.30
  -4  -6  -3  150.98   15.80
   4  -6   3  153.18   11.60
   4  -6   3  121.59   13.10
   4   6   3  132.09   14.20
   4   6   3  117.59   16.30
   6  -6   3    0.30    4.50
  -6  -6  -3   -0.30    9.70
   6  -6   3   -1.50    7.10
   6  -6   3    4.30    5.60
  -6  -6  -3    2.50    4.30
   6  -6   3   -2.00    3.40
   6   6   3   -5.80    5.70
  -6   6  -3    4.00    4.70
   6   6   3    2.80    5.70
  -8  -6  -3   77.39   10.40
   8  -6   3   89.19    9.60
   8  -6   3   96.89   15.50
  -8  -6  -3   75.29   14.90
   8  -6   3   86.29   11.90
  -8   6  -3   71.99    8.50
   8   6   3  105.99   19.30
   8   6   3   86.99   13.40
  10  -6   3   67.69   10.10
  10  -6   3   53.69   13.70
 -10  -6  -3   81.49   16.70
  10   6   3   73.09   12.30
 -10   6  -3   75.79   10.20
  10   6   3   73.49   12.00
  12  -6   3   20.70   11.60
  12  -6   3   26.30    7.70
  12   6   3   31.30   11.20
  12   6   3   37.50   11.40
 -12   6  -3   33.00    8.10
  14  -6   3  200.68   26.40
  14  -6   3  127.19   16.10
 -14  -6  -3  137.59   15.20
  14   6   3  166.88   22.50
  14   6   3  157.48   23.20
 -14   6  -3  159.98   17.20
  16  -6   3  265.37   31.50
  16  -6   3  210.98   27.50
 -16  -6  -3  203.38   18.80
 -16   6  -3  265.37   22.60
  16   6   3  227.58   25.30
  16   6   3  228.88   27.10
  16   6   3  250.57   20.60
  18  -6   3  531.95   48.00
  18   6   3  512.75   36.60
  18   6   3  560.94   43.90
  20   6   3  634.24   49.60
  22  -6   3  253.77   35.30
  22   6   3  244.18   35.20
  25  -7  -3   45.50   18.30
  25  -7  -3   14.50   13.00
  25   7  -3   44.50   15.80
  23  -7  -3   14.60   14.90
  23  -7  -3   11.20   12.30
  23   7  -3   28.50   14.50
  21  -7  -3   25.30   12.40
  21  -7  -3   48.40   17.00
  21   7  -3    2.60   12.50
  19  -7  -3  274.27   27.60
  19  -7  -3  227.58   25.70
  19   7  -3  220.08   28.00
  19   7  -3  218.88   18.30
  17  -7  -3   72.79   13.50
  17  -7  -3   71.19   12.80
  17   7  -3   44.60   12.30
  15  -7  -3  337.27   29.40
  15  -7  -3  313.77   29.10
  15   7  -3  302.47   30.00
  15   7  -3  359.66   23.30
  13  -7  -3  378.06   29.40
  13  -7  -3  328.17   29.10
  13   7  -3  333.37   30.20
 -13   7   3  316.27   26.90
  13   7  -3  390.76   24.50
 -11  -7   3  512.35   37.10
  11  -7  -3  515.35   37.30
  11   7  -3  481.55   37.90
 -11   7   3  516.05   37.20
  11   7  -3  544.45   33.50
 -11   7   3  494.85   35.90
   9  -7  -3  127.29   14.30
   9  -7  -3  139.49   14.90
  -9  -7   3   97.09   13.90
  -9  -7   3  105.59   17.70
   9  -7  -3  105.19   14.30
  -9   7   3  138.89   15.80
   9   7  -3  111.69   16.40
  -9   7   3  112.09   13.30
   9   7  -3  113.39   12.20
   7  -7  -3  251.77   22.50
  -7  -7   3  299.47   21.80
  -7  -7   3  254.97   25.40
   7  -7  -3  292.67   22.30
   7  -7  -3  282.77   22.00
   7   7  -3  267.47   20.70
   7   7  -3  255.37   23.90
  -7   7   3  265.57   21.10
  -7   7   3  355.06   31.00
   5  -7  -3  166.18   14.40
   5  -7  -3  151.98   14.30
  -5  -7   3  145.69   17.10
   5  -7  -3  138.99   17.60
  -5  -7   3  125.49   13.00
  -5  -7   3  160.98   13.90
  -5   7   3  131.79   13.20
  -5   7   3  128.79   14.50
   5   7  -3  157.88   13.70
   5   7  -3  137.29   15.50
  -3  -7   3   99.99   10.30
   3  -7  -3   67.99   10.20
   3  -7  -3   92.89   11.10
  -3  -7   3   95.69   13.60
   3  -7  -3   84.59   11.80
  -3  -7   3   88.69   11.00
   3   7  -3   82.89   12.30
  -3   7   3   94.09   11.90
   3   7  -3   90.89   10.80
  -1  -7   3   83.89    8.70
   1  -7  -3   79.89   11.10
   1  -7  -3   69.29   12.70
  -1  -7   3  117.89   10.60
  -1  -7   3   86.09   13.00
  -1  -7   3   98.59   12.50
   1  -7  -3  100.99   12.10
   1   7  -3   89.99   11.90
  -1   7   3   88.49   12.00
   1  -7   3  219.08   19.40
   1  -7   3  263.17   17.80
  -1  -7  -3  183.68   17.70
  -1  -7  -3  246.88   26.60
  -1  -7  -3  193.18   19.60
   1  -7   3  213.88   20.10
   1  -7   3  230.58   15.90
   1   7   3  203.58   18.80
  -1   7  -3  252.87   18.80
   1   7   3  185.58   20.70
  -3  -7  -3   25.50    8.40
   3  -7   3   10.40    6.80
   3  -7   3    9.90    4.00
   3  -7   3   15.70    7.90
   3  -7   3   23.30    5.60
  -3  -7  -3    5.50    5.00
  -3  -7  -3   12.10    6.30
  -3   7  -3   12.30    5.80
   3   7   3    6.10    8.10
   3   7   3   12.30    6.30
   5  -7   3   33.50    7.10
   5  -7   3   39.20    6.90
   5  -7   3   41.90    7.60
   5  -7   3   37.90   11.10
  -5  -7  -3   32.00    6.50
  -5  -7  -3   19.50    7.70
   5   7   3   44.90    8.70
   5   7   3   24.20    9.10
   7  -7   3  497.25   32.40
   7  -7   3  527.95   39.80
   7  -7   3  508.05   33.10
  -7  -7  -3  463.05   32.90
   7   7   3  451.45   37.50
   7   7   3  506.45   35.10
   9  -7   3  504.75   44.00
  -9  -7  -3  548.85   37.10
   9  -7   3  537.95   37.10
   9  -7   3  656.83   38.00
   9   7   3  574.24   42.70
   9   7   3  551.14   39.80
  11  -7   3  520.85   33.70
 -11  -7  -3  480.65   32.60
  11  -7   3  539.95   43.00
 -11   7  -3  441.96   32.70
  11   7   3  472.95   39.10
  13  -7   3   82.09   17.00
  13  -7   3  106.49   14.20
 -13   7  -3  113.59   14.70
  13   7   3  111.69   19.60
  13   7   3  113.59   21.20
  15  -7   3  215.78   30.30
  15  -7   3  195.68   19.70
  15   7   3  230.48   24.60
 -15   7  -3  221.58   28.70
  15   7   3  228.78   27.00
  17  -7   3   53.59   18.40
  17  -7   3   32.00    9.70
  17   7   3   31.30   13.40
 -17   7  -3   53.29   11.50
  17   7   3   28.10   13.20
  19  -7   3   87.89   20.70
  19   7   3   78.99   17.20
  19   7   3   90.99   17.50
  21  -7   3   40.90   18.50
  21   7   3   22.30   19.00
  21   7   3   33.40   15.30
  24  -8  -3    6.40   15.00
  24  -8  -3   29.00   16.70
  24   8  -3   20.80   13.80
  22  -8  -3  -22.30   11.40
  22  -8  -3  -25.60   12.70
  22   8  -3   -8.40   11.20
  20  -8  -3   56.69   13.70
  20  -8  -3  108.29   24.30
  20   8  -3   43.70   17.40
  20   8  -3   49.30    8.90
  18  -8  -3  651.83   46.30
  18  -8  -3  649.34   45.20
  18   8  -3  556.34   46.00
  18   8  -3  512.45   37.70
  16  -8  -3  889.01   57.99
  16  -8  -3  870.21   57.49
  16   8  -3  782.72   51.29
  16   8  -3  742.13   57.59
  14  -8  -3 1115.29   73.59
  14  -8  -3 1086.09   71.09
  14  -8  -3 1165.88   73.59
  14   8  -3 1140.69   74.39
  14   8  -3 1072.79   68.29
  12  -8  -3  735.43   50.19
  12  -8  -3  680.83   48.40
  12  -8  -3  714.63   50.09
  12   8  -3  804.42   46.30
 -12   8   3  721.83   50.69
 -12   8   3  677.13   47.90
  12   8  -3  720.33   50.99
  10  -8  -3  240.18   21.40
  10   8  -3  220.18   18.20
  10   8  -3  195.68   22.10
 -10   8   3  205.58   19.10
 -10   8   3  230.68   21.90
   8  -8  -3    5.70    6.70
   8  -8  -3   16.50    7.70
  -8  -8   3    0.60    7.10
  -8  -8   3   10.40   12.00
  -8   8   3    7.90    6.30
   8   8  -3   -9.00    6.00
  -8   8   3    6.70    6.60
   8   8  -3    9.30    7.50
   6  -8  -3  258.07   23.20
  -6  -8   3  236.48   23.80
  -6  -8   3  217.38   19.30
  -6  -8   3  195.58   18.10
   6  -8  -3  236.28   20.20
   6  -8  -3  227.98   20.60
  -6   8   3  230.38   20.40
   6   8  -3  214.48   19.00
   6   8  -3  241.48   21.80
   4  -8  -3  436.96   32.90
   4  -8  -3  462.75   32.40
  -4  -8   3  412.86   31.30
  -4  -8   3  474.65   39.20
   4  -8  -3  477.75   32.60
  -4  -8   3  443.86   31.20
   4   8  -3  444.36   31.90
  -4   8   3  461.15   32.60
   4   8  -3  472.65   33.40
   2  -8  -3  418.16   29.80
  -2  -8   3  398.36   29.90
  -2  -8   3  439.86   32.20
  -2  -8   3  402.96   28.50
   2  -8  -3  402.96   30.80
   2  -8  -3  400.76   29.80
   2   8  -3  393.96   29.90
   2   8  -3  410.96   29.70
  -2   8   3  408.66   31.80
   0  -8  -3   35.70    8.20
   0  -8   3   49.80    8.90
   0  -8  -3   30.10    7.00
   0  -8  -3   39.20    9.20
   0  -8   3   40.80    8.60
   0  -8   3   42.20    6.80
   0  -8   3   43.80   10.20
   0   8  -3   42.20    8.20
   0   8   3   35.20   13.40
   0   8   3   25.90    9.40
  -2  -8  -3   93.59   15.40
   2  -8   3  118.09   13.00
   2  -8   3  137.89   11.20
   2   8   3  139.59   16.00
  -2   8  -3  101.49   14.10
   2   8   3  109.99   18.60
   4  -8   3  276.77   23.90
   4  -8   3  329.37   22.70
  -4  -8  -3  334.27   24.70
  -4  -8  -3  310.17   27.80
   4  -8   3  375.76   25.80
   4   8   3  297.77   29.30
   4   8   3  301.57   26.40
  -6  -8  -3 1620.34   99.59
   6  -8   3 1769.72   98.99
   6  -8   3 1678.63  100.09
   6  -8   3 1539.65  104.19
   6   8   3 1537.85  103.89
   6   8   3 1679.83  104.49
   8  -8   3 1488.45   90.89
   8  -8   3 1540.95   91.29
  -8  -8  -3 1473.45   90.99
   8  -8   3 1354.86   96.79
  -8   8  -3 1535.65   89.99
   8   8   3 1572.34   96.89
   8   8   3 1499.45   96.59
  10  -8   3  462.25   42.50
 -10  -8  -3  539.35   34.60
  10  -8   3  513.15   34.40
  10  -8   3  475.45   34.80
  10   8   3  530.05   41.60
 -10   8  -3  543.15   34.30
  10   8   3  501.85   37.80
  12  -8   3  287.57   23.90
  12  -8   3  281.17   33.00
  12   8   3  350.16   31.50
 -12   8  -3  313.37   23.40
  12   8   3  308.47   28.30
  14  -8   3    2.10   14.80
  14  -8   3    7.20    7.00
  14   8   3   21.70   11.10
 -14   8  -3   22.90    8.30
  14   8   3    4.10   11.00
  16  -8   3   -2.40    8.70
  16  -8   3  -18.70   13.80
 -16   8  -3  -16.50    8.10
  16   8   3    8.80   12.70
  16   8   3  -11.20   10.90
  18  -8   3   35.20   17.00
  18  -8   3   28.70   10.30
  18   8   3    6.00   12.90
  18   8   3    2.50   14.40
  20  -8   3   45.60   19.70
  20   8   3   44.30   15.30
  20   8   3   62.09   16.60
  21  -9  -3    2.40   14.40
  21  -9  -3   14.90   13.30
  21   9  -3   28.00   13.10
  19  -9  -3   28.10   13.20
  19  -9  -3   35.90   15.00
  19   9  -3   26.80    7.90
  19   9  -3   22.10   13.40
  17  -9  -3  329.57   31.20
  17  -9  -3  318.87   30.00
  17   9  -3  352.66   32.50
  17   9  -3  282.97   23.60
  15  -9  -3  701.53   50.59
  15  -9  -3  729.33   51.49
  15  -9  -3  736.43   51.39
  15   9  -3  676.13   51.79
  15   9  -3  671.43   45.30
  13  -9  -3  316.67   29.40
  13  -9  -3  337.77   29.30
  13  -9  -3  348.27   27.30
  13   9  -3  300.07   30.70
  13   9  -3  344.07   24.90
  11  -9  -3  516.75   37.90
  11  -9  -3  524.75   36.50
  11  -9  -3  471.65   37.70
 -11   9   3  470.65   38.50
 -11   9   3  459.65   38.70
  11   9  -3  488.15   39.10
  11   9  -3  545.75   34.70
   9  -9  -3   19.60    7.60
   9  -9  -3   -0.90    7.70
  -9  -9   3   15.50    9.00
  -9   9   3    6.00    7.90
   9   9  -3   12.70    9.00
  -9   9   3    8.60    6.50
   9   9  -3   10.30    7.60
   7  -9  -3  351.76   28.90
   7  -9  -3  372.66   29.70
  -7  -9   3  376.46   28.90
   7   9  -3  401.46   28.50
   7   9  -3  370.66   31.00
  -7   9   3  382.86   30.10
  -5  -9   3  475.05   34.90
   5  -9  -3  442.96   38.20
   5  -9  -3  482.65   35.70
  -5   9   3  529.55   36.60
   5   9  -3  520.35   35.80
   5   9  -3  516.25   37.00
   3  -9  -3  478.85   34.60
  -3  -9   3  442.46   35.50
   3  -9  -3  403.26   33.20
  -3  -9   3  408.86   33.60
  -3   9   3  443.06   32.40
   3   9  -3  383.36   32.40
   3   9  -3  453.75   33.00
   1  -9  -3  260.57   37.00
  -1  -9   3  315.77   24.10
  -1  -9   3  336.17   26.00
   1  -9  -3  284.37   26.30
  -1  -9   3  378.26   30.10
   1   9  -3  384.86   28.80
  -1   9   3  352.66   27.40
  -1  -9  -3   34.80    8.00
   1  -9   3   31.40    6.20
  -1  -9  -3   34.80   11.60
   1  -9   3   41.00    9.20
   1  -9   3   42.10    8.80
  -1   9  -3   40.60    9.40
   1   9   3   15.80   10.30
   1   9   3   46.70   10.20
   3  -9   3  -17.70    9.80
  -3  -9  -3   -8.40    9.50
   3  -9   3    9.30    5.00
   3  -9   3    3.70    7.60
   3   9   3    2.00    7.00
  -3   9  -3    1.80    6.70
   5  -9   3  184.98   18.90
  -5  -9  -3  164.48   17.20
   5  -9   3  166.58   15.20
   5  -9   3  173.68   23.50
   5   9   3  135.89   18.80
   5   9   3  155.48   22.80
   7  -9   3  686.03   46.00
   7  -9   3  692.93   51.89
  -7  -9  -3  693.33   45.60
   7  -9   3  678.33   44.70
   7   9   3  673.93   47.30
   7   9   3  703.43   51.79
   9  -9   3  631.34   52.59
   9  -9   3  698.43   45.60
   9  -9   3  679.73   46.00
  -9  -9  -3  730.43   45.50
  -9   9  -3  737.93   44.50
   9   9   3  664.03   48.30
   9   9   3  725.63   52.89
  11  -9   3  581.44   38.80
  11  -9   3  557.24   39.10
  11  -9   3  605.94   48.50
  11   9   3  544.95   45.80
  11   9   3  609.24   42.70
  13  -9   3    5.00    7.20
  13  -9   3   -1.10   13.70
  13   9   3    8.40   10.20
  13   9   3   -5.10   10.80
 -13   9  -3   12.80    7.20
  15  -9   3    4.50   10.20
 -15   9  -3   -9.00    7.30
  15   9   3  -21.10   11.50
  15   9   3    5.00   10.80
  17  -9   3  307.87   37.70
  17   9   3  349.57   31.40
  17   9   3  312.47   36.50
 -17   9  -3  380.06   35.80
  19  -9   3  212.38   36.30
  19   9   3  234.68   31.40
  19   9   3  231.58   26.30
  20 -10  -3   11.90   13.30
  20 -10  -3  -14.90   12.40
  20  10  -3    5.40    7.00
  20  10  -3   13.70   13.60
  18 -10  -3  -11.70   11.60
  18 -10  -3    7.20   12.70
  18  10  -3   13.20    7.70
  18  10  -3   10.80   12.70
  16 -10  -3   19.10   15.70
  16 -10  -3   -6.50    9.80
  16  10  -3   12.80    7.60
  14 -10  -3    0.90    9.30
  14 -10  -3   26.00   10.20
  14  10  -3   18.00   10.30
  14  10  -3   23.60    8.40
  12 -10  -3   25.70    9.60
  12 -10  -3   23.20    9.20
  12  10  -3   16.40   10.50
  12  10  -3   26.50    8.90
  10 -10  -3   13.90    7.60
  10 -10  -3  -13.30    7.70
  10  10  -3  -10.10    9.10
  -8 -10   3    6.70   10.30
   8 -10  -3    5.90    8.10
  -8  10   3   -3.40    8.80
   8  10  -3   17.60    8.30
   8  10  -3    3.30    9.30
  -6 -10   3  253.57   24.80
   6 -10  -3  261.07   24.60
  -6 -10   3  258.17   22.50
   6  10  -3  277.07   27.00
  -6  10   3  284.57   26.40
   4 -10  -3    7.40    8.20
  -4 -10   3   23.00    8.40
  -4  10   3   20.90    9.40
   4  10  -3   10.30    8.90
   4  10  -3   20.70   10.50
  -2 -10   3  232.58   21.10
  -2 -10   3  156.28   21.90
  -2 -10   3  187.78   18.70
   2 -10  -3  194.38   22.00
   2  10  -3  232.48   23.00
  -2  10   3  246.18   22.40
   0 -10  -3  119.69   18.00
   0 -10   3  147.69   14.70
   0 -10   3  110.19   19.90
   0 -10   3  108.59   23.20
   0  10  -3  147.49   19.30
   0  10   3  153.98   18.80
  -2 -10  -3   22.80    9.90
   2 -10   3   38.80   10.30
   2 -10   3   23.10   14.00
   2  10   3   50.59   11.30
   2  10   3   33.30   12.40
  -4 -10  -3    8.40    8.10
   4 -10   3    3.00    6.30
   4 -10   3   24.60   13.10
   4  10   3   18.70    9.80
   4  10   3   -5.40    9.90
  -6 -10  -3   -0.10    8.30
   6 -10   3   26.60   13.40
   6 -10   3   24.90    6.90
   6 -10   3   10.20    8.70
   6  10   3    8.40    9.60
   6  10   3   -3.60   10.40
   8 -10   3   29.00    8.20
   8 -10   3   42.00   13.80
  -8 -10  -3   47.20    9.20
   8 -10   3   43.90   10.00
   8  10   3   31.60   13.00
   8  10   3   36.60   11.10
  10 -10   3   -1.90    7.00
  10 -10   3   -5.40   11.50
  10 -10   3   -3.40    6.40
  10  10   3    0.50    9.20
  12 -10   3   61.49   17.40
  12 -10   3   67.79   13.00
  12 -10   3   34.70    8.50
  12  10   3   64.79   13.40
  12  10   3   42.40   14.60
 -12  10  -3   19.30    7.60
  14 -10   3    2.20   14.00
  14 -10   3   -6.20    7.90
  14  10   3   -3.40   10.20
  14  10   3  -15.80   12.30
 -14  10  -3  -14.10   12.10
  16 -10   3   -5.10   15.20
  16 -10   3   -1.60    8.70
 -16  10  -3    3.00    9.80
  16  10   3    8.90   13.20
  16  10   3   13.70   11.90
  18 -10   3   39.50   20.60
  18  10   3   61.19   14.20
  18  10   3   51.59   16.20
  19 -11  -3   86.79   19.00
  19 -11  -3   54.59   16.20
  19  11  -3   62.19   17.30
  19  11  -3   94.49   13.80
  17 -11  -3  213.18   27.50
  17 -11  -3  185.78   27.50
  17  11  -3  208.68   29.30
  17  11  -3  193.18   19.60
  15 -11  -3  198.48   24.70
  15 -11  -3  143.69   23.30
  15  11  -3  177.58   18.20
  15  11  -3  147.69   25.70
  13 -11  -3  273.27   27.30
  13 -11  -3  303.77   28.20
  13  11  -3  253.87   23.30
  11 -11  -3   96.19   17.20
 -11  11   3   61.79   15.40
  11  11  -3  114.59   21.30
  11  11  -3   63.99   12.80
  -9 -11   3   18.20   12.50
   9 -11  -3   41.50    9.80
   9 -11  -3   21.80    8.80
  -9  11   3    8.80   10.30
   9  11  -3   24.90   11.20
   9  11  -3   28.30   11.60
  -7 -11   3   67.49   14.30
   7 -11  -3   95.89   15.40
   7 -11  -3   58.49   11.50
  -7 -11   3   49.90    9.70
   7  11  -3   76.99   13.00
   7  11  -3   77.39   13.90
  -7  11   3   68.19   14.80
   5 -11  -3  174.48   20.10
  -5  11   3  128.19   20.90
   5  11  -3  202.28   23.30
   5  11  -3  184.68   20.70
   3 -11  -3   -6.70    7.70
  -3  11   3    2.50    8.60
   3  11  -3  -14.30    8.10
  -1 -11   3  236.28   20.20
   1 -11  -3  244.38   23.70
  -1 -11   3  219.28   26.60
  -1  11   3  232.68   23.30
   1  11  -3  193.68   24.60
  -1 -11  -3   13.10    8.80
   1 -11   3    7.00    6.00
   1 -11   3  -13.90   10.40
   1  11   3    8.20    9.40
   1  11   3   -2.60   10.70
   3 -11   3   20.60    7.30
  -3 -11  -3   38.90   11.20
   3 -11   3   29.50   13.00
   3 -11   3   41.20   11.70
   3  11   3   17.80   12.00
   3  11   3   32.80   11.00
  -5 -11  -3  270.97   25.20
   5 -11   3  221.48   29.00
   5 -11   3  226.08   25.00
  -5 -11  -3  263.27   24.10
   5 -11   3  229.18   20.80
   5  11   3  231.78   24.20
   5  11   3  240.78   28.70
   7 -11   3  526.85   39.10
   7 -11   3  533.95   44.30
   7 -11   3  503.45   35.50
  -7 -11  -3  535.35   37.10
   7  11   3  463.75   38.30
   7  11   3  487.95   43.20
   9 -11   3   55.89   10.60
   9 -11   3   64.29   17.80
   9 -11   3   48.00   17.50
   9  11   3   77.29   16.80
   9  11   3  106.19   18.40
  11 -11   3  271.47   25.30
  11 -11   3  247.78   23.20
  11  11   3  282.27   27.40
  11  11   3  308.87   35.90
  13 -11   3    7.20    9.00
  13 -11   3   -0.20   17.20
  13 -11   3    9.90    8.70
  13  11   3   16.80   13.50
  13  11   3   34.80   12.10
  15 -11   3   -5.80    9.00
  15  11   3   -5.50   11.60
  15  11   3   13.50   12.30
 -15  11  -3   -5.00   10.00
  16 -12  -3  851.11   61.99
  16 -12  -3  726.73   59.79
  16  12  -3  780.92   61.39
  16  12  -3  911.91   62.09
  14 -12  -3  757.52   54.69
  14 -12  -3  752.02   55.29
  14  12  -3  741.53   56.19
  14  12  -3  655.23   49.60
  12 -12  -3  573.44   48.20
  12 -12  -3  696.03   58.89
  12  12  -3  687.43   52.19
  12  12  -3  659.23   45.90
  10 -12  -3  215.68   24.20
  10 -12  -3  173.98   23.00
  10  12  -3  214.08   21.80
  10  12  -3  136.59   27.10
 -10  12   3  224.28   32.80
   8 -12  -3   70.79   13.90
   8 -12  -3   41.80   11.50
   8  12  -3   69.99   14.20
  -8  12   3   73.19   14.10
   8  12  -3   59.39   12.30
   6 -12  -3   49.20   10.90
   6 -12  -3   39.10   10.80
  -6 -12   3   15.00   10.80
  -6  12   3   32.70   12.50
   6  12  -3   42.10   12.90
   6  12  -3   32.10   11.50
   4 -12  -3  253.07   23.20
  -4 -12   3  236.58   21.50
   4 -12  -3  239.68   24.10
  -4  12   3  205.28   24.20
   4  12  -3  244.28   26.40
   2 -12  -3  107.39   17.70
  -2 -12   3  139.59   15.10
  -2 -12   3   86.69   16.00
  -2  12   3   96.99   17.90
   2  12  -3  110.19   19.90
   0 -12   3   28.90    7.40
   0 -12  -3    9.00    9.40
   0 -12   3   13.30   12.10
   0  12   3   26.10   10.30
   0  12  -3    7.50   10.50
  -2 -12  -3   40.70   12.10
   2 -12   3   27.20    7.50
   2 -12   3   26.10   13.50
   2  12   3   11.80   12.70
   2  12   3   38.40   11.60
   4 -12   3  194.48   28.50
  -4 -12  -3  294.37   26.40
   4 -12   3  221.78   20.60
  -4 -12  -3  264.17   25.20
   4  12   3  219.98   29.60
   4  12   3  221.48   24.90
  -6 -12  -3  520.85   39.80
  -6 -12  -3  614.94   43.30
   6 -12   3  569.44   46.40
   6 -12   3  527.65   37.70
   6  12   3  501.45   41.20
   6  12   3  497.25   49.00
  -8 -12  -3  811.72   50.59
   8 -12   3  714.13   53.09
   8 -12   3  730.13   58.79
   8 -12   3  759.02   49.90
   8  12   3  666.73   52.19
   8  12   3  757.62   58.59
  10 -12   3  721.63   65.89
  10 -12   3  897.01   55.29
  10 -12   3  761.92   56.39
  10  12   3  860.31   64.29
  10  12   3  864.71   58.29
  12 -12   3  405.16   32.70
  12 -12   3  409.16   43.30
  12  12   3  420.46   36.10
  12  12   3  439.76   42.80
  14 -12   3    2.50    9.80
  14 -12   3    3.60   17.20
  14  12   3   22.00   15.00
  14  12   3   36.00   13.30
  13 -13  -3  136.99   25.70
  13  13  -3  183.58   21.50
  13  13  -3  179.58   28.70
  11 -13  -3   71.09   16.00
  11 -13  -3   83.59   17.70
  11  13  -3  123.49   25.00
  11  13  -3  112.99   18.90
   9 -13  -3    9.50   14.00
   9 -13  -3   37.40   11.50
   9  13  -3   18.40   12.60
   9  13  -3   13.70   12.20
  -9  13   3   29.10   13.60
  -7 -13   3   20.20    8.60
   7 -13  -3    5.70    9.40
   7 -13  -3   -5.00   10.00
   7  13  -3    2.50   11.00
   7  13  -3    1.40   14.60
  -7  13   3   16.00   11.90
   5 -13  -3    7.50    9.30
   5 -13  -3   -7.80    8.70
  -5 -13   3    5.30    7.80
   5  13  -3   -4.70   10.00
  -3 -13   3   -1.00    6.90
   3 -13  -3    4.80    8.40
   3 -13  -3  -15.40    7.50
   3  13  -3   -3.40    9.90
  -3  13   3    7.40   10.30
   1 -13  -3   -1.70    8.60
   1 -13  -3   19.20   10.00
  -1 -13   3  -13.30   12.60
  -1 -13   3   23.00    7.80
  -1  13   3   16.60   11.00
   1  13  -3   16.40   10.80
  -1 -13  -3   34.70   12.50
   1 -13   3   48.10   16.50
  -1 -13  -3   46.40   10.80
   1 -13   3   74.59   12.50
   1  13   3   44.70   13.90
   3 -13   3   48.80   15.20
   3 -13   3   80.89   16.90
  -3 -13  -3   47.90   13.40
   3  13   3   68.99   14.60
  -5 -13  -3  211.48   24.00
  -5 -13  -3  169.78   24.50
   5 -13   3  200.08   20.00
   5 -13   3  159.58   27.60
  -5 -13  -3  197.08   21.80
   5  13   3  151.08   23.10
  -7 -13  -3  359.06   32.40
   7 -13   3  382.56   28.70
  -7 -13  -3  302.57   34.40
  -7 -13  -3  383.76   26.80
   7 -13   3  396.96   48.70
   7  13   3  315.97   37.50
   7  13   3  312.27   32.30
   9 -13   3  195.38   32.90
   9 -13   3  230.28   22.60
   9  13   3  203.68   31.80
   9  13   3  228.98   26.30
  11 -13   3  228.58   35.30
  11 -13   3  211.28   29.50
  11  13   3  166.88   31.70
  11  13   3  237.08   26.60
  10 -14  -3   66.29   15.90
  10 -14  -3   53.59   15.10
  10  14  -3   75.49   16.80
  10  14  -3   57.49   14.00
   8 -14  -3  123.99   22.70
  -8 -14   3  150.18   21.00
   8 -14  -3  139.79   22.50
   8  14  -3  152.28   26.30
  -8  14   3  103.69   20.30
  -6 -14   3  160.08   21.40
   6 -14  -3  133.69   22.70
   6 -14  -3  174.18   23.60
   6  14  -3  169.58   26.40
  -6  14   3  146.59   23.40
  -4 -14   3  272.47   25.40
   4 -14  -3  270.17   27.10
   4 -14  -3  207.68   26.70
   4  14  -3  334.37   38.20
  -4  14   3  246.58   27.80
   2 -14  -3   57.89   14.40
   2 -14  -3   67.59   14.70
  -2 -14   3   60.19   11.70
  -2 -14   3   48.30   15.20
  -2  14   3   71.39   15.60
   2  14  -3   50.89   14.40
   0 -14  -3  157.68   20.00
   0 -14   3  116.89   20.90
   0 -14   3  152.38   18.00
   0 -14  -3  154.18   22.60
   0  14   3  127.39   21.90
   0  14  -3  116.99   23.40
   2 -14   3    7.20   14.00
  -2 -14  -3   26.10   13.90
  -2 -14  -3   39.90   10.40
   2 -14   3   21.30    9.20
   2  14   3   24.60   13.50
  -4 -14  -3   19.20   13.20
   4 -14   3   24.80    9.40
   4 -14   3   -4.70   13.30
  -4 -14  -3   18.80    8.40
   4  14   3   16.00   15.30
  -6 -14  -3   -7.60   10.70
   6 -14   3  -26.00   12.90
  -6 -14  -3   15.10    8.40
   6  14   3   20.20   18.90
   6  14   3  -20.40   12.50
  28   0  -4   37.50   14.80
  28   0  -4   42.20   14.10
  26   0  -4   41.70   14.80
  26   0  -4   70.79   15.70
  24   0  -4    4.60   10.30
  24   0  -4   28.50    8.90
  24   0  -4  -16.90   10.90
  22   0  -4  115.59   20.20
  22   0  -4  111.19   14.10
  22   0  -4  135.09   18.60
  22   0  -4  117.89   18.50
  20   0  -4 1462.45   80.49
  20   0  -4 1247.28   80.99
  20   0  -4 1228.78   77.99
  20   0  -4 1136.09   81.29
  18   0  -4  802.92   49.60
  18   0  -4  745.13   47.80
  18   0  -4  718.13   50.59
  16   0  -4   90.19   13.30
 -16   0   4   84.19   12.80
  16   0  -4   75.09   11.60
  16   0  -4  114.09   10.30
  14   0  -4  188.28   18.70
  14   0  -4  259.77   16.70
 -14   0   4  222.48   19.40
  12   0  -4    0.70    4.30
  12   0  -4   -1.90    3.00
 -12   0   4   -2.20    4.00
  10   0  -4 1496.75   90.49
 -10   0   4 1490.45   90.79
  10   0  -4 1504.45   88.59
   8   0  -4  706.03   41.20
   8   0  -4  662.13   42.80
  -8   0   4  684.93   43.00
   6   0  -4 6472.85  376.96
  -6   0   4 6507.75  376.86
   6   0  -4 6489.05  378.16
  -4   0   4 5210.08  273.67
   4   0  -4 4444.06  273.67
  -4   0   4 4629.04  273.77
   4   0  -4 4499.95  274.07
  -2   0   4 1344.67   83.69
   2   0  -4 1413.06   83.79
   2   0  -4 1466.55   83.69
  -2   0   4 1396.56   82.89
   0   0  -4 1438.76   83.59
   0   0   4 1354.66   83.49
  -2   0  -4 1222.98   73.09
   2   0   4 1134.09   71.69
  -2   0  -4 1201.08   70.19
   4   0   4 4827.72  294.27
  -4   0  -4 4896.51  294.07
  -4   0  -4 5349.67  292.57
   6   0   4 4877.01  273.37
   6   0   4 4533.05  275.07
  -6   0  -4 4565.24  274.77
  -6   0  -4 4758.62  273.17
  -8   0  -4  134.49   11.40
  -8   0  -4  128.69   13.30
   8   0   4  138.79   14.80
   8   0   4  130.79   12.10
  10   0   4  117.19   14.70
 -10   0  -4  119.19   13.10
 -10   0  -4  116.59   11.90
  10   0   4  110.99   12.00
  12   0   4 1414.46   90.49
  12   0   4 1486.45   88.49
 -12   0  -4 1472.45   89.39
 -12   0  -4 1450.75   89.79
  14   0   4 1802.72  107.59
  14   0   4 1694.73  113.09
 -14   0  -4 1809.92  108.89
 -14   0  -4 1789.42  109.19
  16   0   4  505.05   36.50
  16   0   4  528.95   39.90
 -16   0  -4  516.65   37.70
  18   0   4   -1.20   10.80
  18   0   4   -9.20    7.40
  20   0   4   -2.70    8.50
  20   0   4  -13.60   11.40
  22   0   4    1.10   13.40
  22   0   4    1.90   14.10
  24   0   4   68.29   14.00
  24   0   4   90.09   18.80
  27  -1  -4   14.20   14.00
  27  -1  -4   22.40   12.20
  27   1  -4   -3.40   11.10
  27   1  -4   48.60   11.30
  27   1  -4   -0.90   12.00
  25  -1  -4    0.80   10.10
  25   1  -4   -1.30   10.40
  25   1  -4   11.80    9.20
  23  -1  -4   43.80   12.10
  23  -1  -4   63.79   10.50
  23  -1  -4   44.20   13.60
  23   1  -4   56.29   13.60
  23   1  -4   17.80   15.90
  23   1  -4   64.79    9.80
  21  -1  -4  255.27   24.00
  21  -1  -4  203.18   23.00
  21   1  -4  245.58   21.90
  21   1  -4  240.48   25.30
  21   1  -4  193.38   17.90
  19  -1  -4   60.79    9.50
  19  -1  -4   64.99   11.70
  19   1  -4   50.49   11.00
  19   1  -4   70.09    9.40
  19   1  -4   49.40    9.10
  17  -1  -4   59.09   10.40
  17  -1  -4   89.09   10.50
  17  -1  -4   51.59    9.60
  17   1  -4   61.69   11.40
  17   1  -4   83.99    9.00
 -17   1   4   76.19   12.90
  17   1  -4   68.69   11.30
  15  -1  -4   31.90    6.70
  15  -1  -4   40.90    8.70
 -15  -1   4   30.90    7.40
 -15   1   4   44.10    7.90
  15   1  -4   25.30    8.60
  15   1  -4   24.40    6.10
  15   1  -4   49.20    8.80
  13  -1  -4   15.50    5.10
 -13  -1   4   14.30    6.50
  13  -1  -4   13.70    5.90
  13   1  -4   17.20    4.10
 -13   1   4   20.00    6.30
  13   1  -4   16.90    6.00
  11  -1  -4  818.72   48.50
  11  -1  -4  676.23   46.20
 -11  -1   4  747.53   48.10
  11   1  -4  787.42   45.20
 -11   1   4  762.62   48.20
  11   1  -4  727.33   47.60
   9  -1  -4 1327.47   79.69
   9  -1  -4 1375.56   81.19
  -9  -1   4 1326.57   80.99
   9   1  -4 1365.96   80.69
  -9   1   4 1337.47   81.09
  -9   1   4 1284.07   79.29
   7  -1  -4 1153.98   68.29
  -7  -1   4 1181.18   69.19
   7  -1  -4 1116.39   69.19
  -7   1   4 1140.19   68.09
   7   1  -4 1132.19   68.79
  -7   1   4 1138.29   69.29
  -5  -1   4 2350.26  136.39
   5  -1  -4 2254.87  136.69
  -5  -1   4 2380.66  136.39
   5  -1  -4 2288.47  136.19
  -5   1   4 2352.16  136.09
   5   1  -4 2247.18  136.09
   5   1  -4 2355.26  136.29
   3  -1  -4   19.10    3.50
   3  -1  -4   17.70    3.90
  -3  -1   4   19.70    3.00
  -3  -1   4   19.00    3.80
   3   1  -4   20.60    3.40
  -3   1   4   25.40    4.40
   3   1  -4   19.00    3.90
  -3   1   4   18.50    3.40
   1  -1  -4 1805.82  107.69
  -1  -1   4 1746.43  108.29
   1  -1  -4 1816.12  108.49
  -1  -1   4 1899.31  106.79
  -1   1   4 1796.72  108.49
  -1   1   4 1865.91  107.69
   1   1  -4 1799.92  108.19
   1   1  -4 1884.11  106.79
  -1  -1  -4 2850.31  172.78
   1  -1   4 2951.60  173.78
  -1  -1  -4 3023.00  173.78
   1   1   4 2976.50  173.68
  -3  -1  -4 2198.88  119.49
   3  -1   4 1961.40  119.39
  -3  -1  -4 2098.79  118.29
   3   1   4 2039.90  119.19
   3   1   4 1777.72  117.99
  -3   1  -4 1943.91  118.99
  -5  -1  -4 1558.64   94.99
  -5  -1  -4 1760.02   94.59
   5  -1   4 1503.35   95.59
   5   1   4 1541.65   95.19
  -5   1  -4 1519.35   95.09
   5   1   4 1609.44   94.49
   7  -1   4  552.44   39.40
  -7  -1  -4  649.14   38.70
  -7  -1  -4  589.54   38.60
  -7   1  -4  524.95   36.80
  -7   1  -4  579.34   38.80
   7   1   4  610.14   39.00
   7   1   4  640.44   38.20
  -9  -1  -4  114.49   12.10
  -9  -1  -4  112.99   11.40
   9  -1   4   88.39   13.80
  -9   1  -4   82.09   10.70
  -9   1  -4   96.09   12.10
   9   1   4  120.39   12.10
   9   1   4  106.69   13.30
 -11  -1  -4   98.69   11.70
  11  -1   4   94.89   11.30
 -11  -1  -4   95.09   12.10
 -11  -1  -4  123.99   13.40
  11  -1   4   87.99   15.50
  11   1   4  124.89   13.50
 -11   1  -4   88.59   12.80
  11   1   4  119.69   14.70
 -11   1  -4  101.09   12.50
 -13  -1  -4  346.27   27.60
  13  -1   4  341.17   25.50
 -13  -1  -4  373.96   27.80
 -13   1  -4  354.86   27.20
  13   1   4  353.46   29.00
  13   1   4  417.16   28.20
 -13   1  -4  339.77   27.90
  15  -1   4  320.67   29.50
 -15  -1  -4  328.67   27.60
 -15   1  -4  352.36   28.10
 -15   1  -4  274.07   25.80
  15   1   4  352.76   27.20
  17  -1   4   80.79   13.60
 -17  -1  -4   80.49   14.90
  17  -1   4   86.89   15.30
  17   1   4   69.89   13.60
  17   1   4   56.99   12.00
  19  -1   4   23.90   13.30
  19  -1   4    6.90    8.00
  19   1   4    5.60    9.70
  19   1   4    1.50   11.50
  21  -1   4    9.20   12.70
  21  -1   4    1.00    8.10
  21   1   4  -11.10    9.20
  23  -1   4   23.00    9.50
  23  -1   4   19.10   14.90
  23   1   4    7.70   11.10
  23   1   4   26.90   15.20
  28  -2  -4   44.50   16.20
  28  -2  -4   50.49   15.50
  28   2  -4   17.40   11.30
  28   2  -4   14.00   23.10
  28   2  -4   27.80   11.10
  26  -2  -4   11.20   13.90
  26  -2  -4    9.40   10.90
  26  -2  -4    4.90   11.00
  26   2  -4   32.90   13.30
  26   2  -4    7.30   12.10
  26   2  -4   14.60   12.70
  24  -2  -4   42.20   14.70
  24  -2  -4   47.50   13.00
  24   2  -4   16.90    9.60
  24   2  -4   25.20    7.90
  24   2  -4    8.50   11.50
  22  -2  -4   63.49   13.20
  22  -2  -4   55.99   10.00
  22  -2  -4   71.69   13.40
  22   2  -4   73.99   10.60
  20  -2  -4  450.85   32.80
  20  -2  -4  470.05   33.00
  20  -2  -4  324.57   28.40
  20   2  -4  392.86   28.70
  20   2  -4  311.07   32.30
  20   2  -4  403.36   26.80
  18  -2  -4  175.88   17.60
  18   2  -4  191.98   17.80
  18   2  -4  177.58   22.70
  18   2  -4  238.08   15.90
 -16  -2   4  374.86   30.10
  16  -2  -4  433.86   30.60
  16  -2  -4  390.96   29.40
  16   2  -4  390.66   26.30
 -16   2   4  396.16   30.60
  14  -2  -4   67.09   10.70
  14  -2  -4  101.39   13.00
 -14   2   4   69.69   12.00
  14   2  -4   98.49   12.10
  14   2  -4   73.89    7.50
  12  -2  -4   67.19   11.20
 -12  -2   4   63.79   10.20
  12   2  -4   60.59    9.90
 -12   2   4   66.79   10.50
  10  -2  -4  540.85   38.50
 -10  -2   4  615.94   39.70
  10  -2  -4  672.93   40.50
 -10   2   4  611.44   39.90
  10   2  -4  593.84   39.10
 -10   2   4  639.54   38.60
   8  -2  -4  505.45   32.80
   8  -2  -4  466.65   31.90
  -8  -2   4  505.75   32.50
   8   2  -4  509.65   32.20
  -8   2   4  498.65   32.70
  -8   2   4  490.55   31.70
   8   2  -4  530.75   31.10
   6  -2  -4 2893.91  165.08
   6  -2  -4 2666.33  163.88
  -6  -2   4 2855.21  164.28
  -6   2   4 2690.03  163.78
   6   2  -4 2727.53  162.98
   6   2  -4 2732.53  162.58
  -6   2   4 2883.91  163.28
  -4  -2   4 1031.90   61.49
   4  -2  -4 1171.18   64.19
   4  -2  -4 1009.40   62.59
  -4  -2   4  969.20   61.79
   4   2  -4 1004.90   61.29
   4   2  -4  988.60   61.69
  -4   2   4 1003.00   62.29
  -4   2   4 1092.49   62.39
  -2  -2   4 1051.19   60.29
  -2  -2   4  967.90   61.79
   2  -2  -4  973.60   61.69
  -2   2   4 1092.19   62.29
   2   2  -4 1052.79   60.19
   2   2  -4 1008.60   61.59
   0  -2  -4   11.00    3.20
   0  -2   4   14.80    4.40
   0  -2  -4   20.90    5.10
   0   2   4   13.10    4.20
   0   2   4   13.20    5.20
   2  -2   4  209.08   16.60
   2   2   4  220.28   16.10
   2   2   4  203.38   15.90
  -2   2  -4  226.98   16.00
   4  -2   4  159.68   14.40
  -4  -2  -4  153.28   13.00
  -4  -2  -4  158.88   13.20
   4   2   4  140.49   13.10
  -4   2  -4  161.18   13.50
  -4   2  -4  161.58   11.00
   4   2   4  178.98   13.90
  -6  -2  -4  165.38   13.30
   6  -2   4  127.79   14.70
   6   2   4  179.98   14.50
   6   2   4  126.59   13.10
  -6   2  -4  130.39   13.60
  -6   2  -4  140.99   11.20
   8  -2   4    4.70    6.50
  -8  -2  -4    7.30    4.50
  -8  -2  -4   13.40    5.10
  -8   2  -4    6.20    5.20
   8   2   4    2.80    5.30
   8   2   4    9.70    5.70
  -8   2  -4    8.60    4.60
 -10  -2  -4  147.69   14.90
  10  -2   4  169.38   18.00
  10   2   4  151.38   15.40
 -10   2  -4  169.98   15.70
 -10   2  -4  149.29   14.10
  10   2   4  144.99   15.90
 -12  -2  -4  264.57   21.40
 -12  -2  -4  250.77   21.30
  12  -2   4  315.57   32.90
  12   2   4  235.58   21.90
 -12   2  -4  246.58   21.70
  12   2   4  255.37   22.00
 -12   2  -4  237.48   20.60
 -14  -2  -4  244.18   21.40
  14  -2   4  249.58   25.10
  14   2   4  221.28   22.30
  14   2   4  222.98   22.20
  16  -2   4  350.16   30.80
 -16   2  -4  308.77   25.60
  16   2   4  263.87   26.60
  16   2   4  282.17   27.10
  18  -2   4   83.59   16.40
 -18  -2  -4   80.89   14.60
  18  -2   4   77.49   12.50
  18   2   4   46.40   14.50
  18   2   4   58.59   13.20
  20  -2   4   27.80   14.10
  20  -2   4   27.10    8.00
  20   2   4  -14.00    9.60
  20   2   4    7.10   11.10
  22  -2   4   -5.50   13.30
  22  -2   4   -3.90    7.50
  22   2   4  -16.50   11.30
  22   2   4  -15.30   10.40
  24  -2   4   26.40   19.20
  24  -2   4   17.00    8.70
  24   2   4   21.10   13.20
  24   2   4   -3.60   12.00
  27  -3  -4    9.80   15.50
  27  -3  -4   22.80   12.40
  27  -3  -4   10.60   12.70
  27   3  -4   17.80   10.00
  27   3  -4    5.10   17.90
  25  -3  -4   19.20   12.30
  25  -3  -4   18.00   13.90
  25   3  -4   28.40   12.90
  25   3  -4   23.50    7.70
  25   3  -4    0.10    9.20
  23  -3  -4   90.19   16.20
  23  -3  -4  155.98   21.90
  23   3  -4  122.39   14.80
  23   3  -4  109.79   12.40
  21  -3  -4  641.34   42.30
  21  -3  -4  462.75   40.10
  21   3  -4  498.65   34.80
  21   3  -4  557.44   36.30
  21   3  -4  541.35   42.40
  19  -3  -4 1159.58   70.09
  19  -3  -4  997.30   69.49
  19  -3  -4 1050.39   67.89
  19   3  -4 1061.09   70.99
  19   3  -4 1072.89   65.39
  17  -3  -4  517.85   36.70
  17  -3  -4  500.25   36.90
  17   3  -4  531.95   38.50
  17   3  -4  477.95   32.60
 -15  -3   4  163.98   17.30
  15  -3  -4  188.08   16.40
 -15   3   4  152.08   17.00
  13  -3  -4  581.34   41.00
  13  -3  -4  613.64   39.80
 -13  -3   4  616.14   40.90
 -13   3   4  594.04   40.90
  13   3  -4  626.94   42.40
 -11  -3   4 1022.90   63.29
  11  -3  -4  976.10   63.59
  11  -3  -4 1029.80   62.69
 -11   3   4 1003.90   63.39
  11   3  -4 1044.20   64.69
 -11   3   4  983.30   62.29
   9  -3  -4 1354.56   86.59
  -9  -3   4 1423.56   86.19
   9  -3  -4 1508.75   86.39
   9   3  -4 1467.75   87.59
  -9   3   4 1395.46   85.79
  -9   3   4 1392.66   86.49
   7  -3  -4 3776.42  220.48
   7  -3  -4 3749.22  220.98
  -7  -3   4 3751.62  219.98
   7   3  -4 3629.14  221.08
  -7   3   4 3737.83  220.68
  -7   3   4 3913.21  220.28
   7   3  -4 3695.33  218.48
  -5  -3   4  764.82   48.00
   5  -3  -4  779.22   49.40
  -5  -3   4  870.41   47.00
   5  -3  -4  776.92   49.20
  -5  -3   4  793.12   48.70
  -5   3   4  872.31   49.30
  -5   3   4  761.02   49.00
   5   3  -4  730.93   49.30
   5   3  -4  788.12   47.70
   3  -3  -4 1603.44   95.49
  -3  -3   4 1559.94   94.59
   3  -3  -4 1550.44   95.19
  -3  -3   4 1596.64   93.49
   3   3  -4 1563.04   94.89
   3   3  -4 1552.14   94.09
  -3   3   4 1731.73   95.39
  -3   3   4 1575.14   94.99
   1  -3  -4  689.63   41.60
   1  -3  -4  657.83   42.00
   1  -3  -4  650.43   41.70
   1  -3  -4  624.44   41.60
  -1  -3   4  655.13   41.60
  -1   3   4  714.73   42.00
   1   3  -4  650.63   40.60
  -1  -3  -4 2544.75  157.28
  -1  -3  -4 2600.24  157.28
   1  -3   4 2577.04  157.58
   1   3   4 2791.02  157.78
  -1   3  -4 2573.64  156.88
  -1   3  -4 2875.51  155.68
  -3  -3  -4 2769.32  163.08
  -3  -3  -4 2669.23  162.68
   3  -3   4 2751.22  163.68
   3   3   4 2769.22  162.78
  -3   3  -4 2789.22  162.88
   3   3   4 2773.62  163.78
  -5  -3  -4 3185.88  195.48
   5  -3   4 3423.06  197.28
  -5  -3  -4 3185.38  196.08
   5   3   4 3498.35  197.08
  -5   3  -4 3205.98  195.98
   5   3   4 3243.58  195.58
  -5   3  -4 3490.95  193.78
  -7  -3  -4  852.11   54.39
  -7  -3  -4  786.72   55.09
   7  -3   4  902.41   56.79
  -7   3  -4  874.71   55.19
  -7   3  -4  922.01   56.79
   7   3   4  911.31   56.09
   7   3   4  855.71   54.59
  -9  -3  -4   76.69   10.20
   9  -3   4   94.19   14.60
  -9  -3  -4   61.59   11.80
   9   3   4   68.99   10.90
   9   3   4   50.29    9.30
  -9   3  -4   65.39   10.90
  -9   3  -4   67.99    8.70
  11  -3   4  416.86   35.60
 -11  -3  -4  419.76   28.90
 -11  -3  -4  372.66   30.20
 -11   3  -4  421.36   28.40
  11   3   4  394.46   29.20
 -11   3  -4  391.96   29.70
  11   3   4  430.36   31.30
 -13  -3  -4  495.75   34.70
 -13  -3  -4  406.86   35.60
  13  -3   4  566.94   39.70
 -13   3  -4  490.95   34.30
  13   3   4  516.95   37.20
  13   3   4  503.45   35.30
 -15  -3  -4  891.61   60.49
  15  -3   4  999.30   65.39
  15   3   4 1041.00   69.49
 -15   3  -4  896.81   60.79
  15   3   4  906.91   61.19
 -17  -3  -4  195.38   28.40
  17  -3   4  276.57   29.10
  17   3   4  251.37   23.70
  17   3   4  203.38   24.90
 -19  -3  -4  232.88   21.50
  19  -3   4  236.28   29.90
  19   3   4  218.08   23.90
  19   3   4  185.58   25.10
  21  -3   4  -14.90   13.90
  21   3   4    3.80   11.00
  23  -3   4   50.29   18.60
  23   3   4   43.10   12.80
  23   3   4   25.30   13.20
  26  -4  -4  -23.20   17.40
  26  -4  -4    8.80   11.90
  26   4  -4   16.90    7.70
  26   4  -4  -26.10   22.10
  24  -4  -4  119.99   22.00
  24  -4  -4  161.68   25.50
  24   4  -4  132.49   13.60
  24   4  -4  166.48   25.90
  22  -4  -4  148.99   23.60
  22  -4  -4  143.79   21.70
  22   4  -4  161.98   24.00
  20  -4  -4  544.65   39.50
  20  -4  -4  439.96   38.30
  20   4  -4  513.85   40.60
  18  -4  -4  688.43   45.50
  18  -4  -4  636.14   45.50
  18  -4  -4  599.84   43.30
  18   4  -4  625.44   46.40
  16  -4  -4  519.15   39.00
  16  -4  -4  655.53   41.60
  16  -4  -4  634.74   41.00
  16   4  -4  501.45   41.40
 -16   4   4  583.74   40.90
 -14  -4   4   11.80    6.20
  14  -4  -4   11.20    6.40
  14  -4  -4   11.90    5.90
 -14   4   4    9.30    5.80
  14   4  -4   16.30    7.50
  12  -4  -4  549.54   36.20
  12  -4  -4  499.35   34.60
 -12  -4   4  492.45   35.00
 -12   4   4  481.95   35.00
 -12   4   4  565.24   35.00
  12   4  -4  489.85   36.50
 -10  -4   4  351.46   25.10
  10  -4  -4  375.26   25.50
  10  -4  -4  350.76   25.80
 -10   4   4  354.26   25.00
 -10   4   4  339.37   25.20
  10   4  -4  325.17   26.60
   8  -4  -4 1196.78   76.29
   8  -4  -4 1249.38   76.09
  -8  -4   4 1237.78   75.39
   8   4  -4 1286.07   76.89
  -8   4   4 1202.58   75.69
  -8   4   4 1253.97   75.59
   6  -4  -4  566.54   37.90
  -6  -4   4  534.95   35.00
   6  -4  -4  580.14   37.90
  -6  -4   4  600.74   36.60
  -6   4   4  605.44   37.50
   6   4  -4  547.35   35.00
  -6   4   4  621.14   37.70
   6   4  -4  590.54   38.20
   4  -4  -4  407.96   28.80
  -4  -4   4  451.65   26.80
   4  -4  -4  415.06   28.40
  -4  -4   4  381.56   26.20
  -4  -4   4  420.16   28.90
  -4  -4   4  395.16   27.30
   4   4  -4  459.05   28.80
  -4   4   4  439.46   28.20
  -4   4   4  436.26   28.60
   4   4  -4  432.36   26.70
  -2  -4   4  158.08   12.60
   2  -4  -4  160.48   14.00
  -2  -4   4  147.89   13.20
   2  -4  -4  151.08   13.00
   2  -4  -4  141.59   13.40
  -2  -4   4  144.39   13.00
   2   4  -4  161.08   12.80
  -2   4   4  156.58   13.50
   2   4  -4  179.48   13.50
   0  -4   4 1042.00   62.19
   0  -4  -4  930.41   61.59
   0  -4   4  938.71   60.69
   0  -4  -4 1049.30   62.49
   0  -4  -4 1008.90   62.09
   0  -4  -4  940.91   61.59
   0   4  -4 1038.00   61.19
   0   4  -4  989.90   60.29
   0   4   4 1088.99   62.29
  -2  -4  -4 1302.67   78.39
  -2  -4  -4 1193.18   77.69
   2  -4   4 1224.58   76.19
   2  -4   4 1321.97   78.99
  -2   4  -4 1272.07   77.59
   2   4   4 1222.68   79.09
   2   4   4 1334.47   78.59
  -2   4  -4 1377.06   76.89
  -4  -4  -4  796.42   46.80
  -4  -4  -4  683.63   45.20
   4  -4   4  692.93   47.10
   4   4   4  761.62   46.70
   4   4   4  668.33   46.90
  -4   4  -4  689.63   45.30
   6  -4   4  144.19   16.40
  -6  -4  -4  130.39   13.00
  -6   4  -4  147.39   10.40
   6   4   4  126.99   13.10
  -6   4  -4  129.79   13.20
   6   4   4  123.99   15.40
   8  -4   4   46.40    9.60
  -8  -4  -4   48.70    8.80
  -8  -4  -4   51.79    9.10
  -8   4  -4   62.59   14.70
  -8   4  -4   53.49    6.70
   8   4   4   34.90    8.60
   8   4   4   33.80    6.80
 -10  -4  -4   42.80    7.60
  10  -4   4   66.89   12.30
 -10   4  -4   59.39    8.30
  10   4   4   36.80   10.00
  10   4   4   52.59    8.60
 -10   4  -4   57.69   10.50
 -12  -4  -4  836.32   52.39
  12  -4   4  879.31   57.59
 -12  -4  -4  765.02   56.19
 -12   4  -4  805.52   51.89
  12   4   4  813.42   56.89
  12   4   4  800.32   52.59
 -14  -4  -4  454.65   33.50
  14  -4   4  399.76   35.70
 -14  -4  -4  419.16   29.80
  14   4   4  360.66   29.90
 -14   4  -4  385.16   29.80
  14   4   4  363.06   32.80
  16  -4   4  986.90   68.69
 -16  -4  -4  882.01   61.89
 -16   4  -4  983.80   63.19
  16   4   4 1038.10   66.29
  16   4   4  972.10   62.99
 -18  -4  -4  124.39   23.80
  18  -4   4  140.99   26.40
  18   4   4  128.19   21.30
  18   4   4  150.78   19.30
 -20  -4  -4    0.80    8.00
  20   4   4  -10.00   10.70
  20   4   4   -3.90   11.30
  22  -4   4   23.30   17.20
  22   4   4   44.50   11.70
  22   4   4   27.70   13.50
  27  -5  -4   15.40   13.10
  27  -5  -4  -17.10   17.80
  27   5  -4   -1.60   13.40
  25  -5  -4   20.90   18.60
  25  -5  -4   16.10   18.90
  25   5  -4  -10.40   19.60
  23  -5  -4   38.70   14.70
  23  -5  -4   41.80   13.70
  23   5  -4   25.70   13.50
  21  -5  -4   44.80   12.60
  21  -5  -4   38.80   12.60
  21   5  -4   19.40   12.10
  19  -5  -4   27.60   10.50
  19  -5  -4   32.10   11.90
  19   5  -4   51.39   12.90
  17  -5  -4   91.09   16.00
  17  -5  -4   87.79   16.20
  17   5  -4  107.69   18.50
  15  -5  -4    4.00    6.80
  15  -5  -4   -0.20    6.70
 -15   5   4   -4.90    5.40
  15   5  -4    5.90    7.50
 -13  -5   4   86.49   12.60
  13  -5  -4   76.29   12.20
  13   5  -4   75.59   14.60
 -13   5   4   77.59   11.50
 -13   5   4   59.99   11.20
  11  -5  -4  120.79   13.80
  11  -5  -4  128.99   13.50
 -11  -5   4  124.09   13.30
 -11   5   4  108.79   13.30
 -11   5   4  122.59   13.40
  11   5  -4  144.39   15.70
   9  -5  -4  543.65   38.40
  -9  -5   4  583.74   37.70
   9  -5  -4  551.54   38.20
  -9   5   4  561.44   37.90
  -9   5   4  571.84   37.80
   9   5  -4  596.84   39.30
  -7  -5   4   38.80    7.20
   7  -5  -4   44.90    8.50
  -7  -5   4   35.90    8.20
  -7  -5   4   65.39    8.50
   7  -5  -4   49.50    8.50
  -7   5   4   46.20    7.10
   7   5  -4   57.09   11.10
  -7   5   4   48.50    8.00
  -5  -5   4  213.08   15.70
   5  -5  -4  194.18   16.90
  -5  -5   4  192.28   18.00
   5  -5  -4  182.38   17.50
   5   5  -4  241.38   14.40
  -5   5   4  187.98   17.00
   5   5  -4  205.88   17.60
  -5   5   4  200.68   16.30
   3  -5  -4   73.69   11.90
  -3  -5   4   66.19    8.40
  -3  -5   4  103.39   10.70
  -3  -5   4   92.89   11.70
   3  -5  -4   89.89   10.50
   3  -5  -4  102.19   11.30
  -3   5   4   79.89   11.00
   3   5  -4  101.09    8.90
   3   5  -4   76.99   10.90
   1  -5  -4  243.78   19.20
   1  -5  -4  232.08   19.20
   1  -5  -4  241.48   20.20
  -1  -5   4  271.77   17.60
  -1  -5   4  243.98   19.40
  -1  -5   4  230.08   18.90
   1   5  -4  251.47   17.70
   1   5  -4  227.58   18.10
  -1   5   4  262.47   19.60
  -1  -5  -4  920.21   58.29
   1  -5   4  990.60   56.49
   1  -5   4  896.81   58.09
  -1  -5  -4  870.01   56.99
  -1  -5  -4  936.31   57.79
   1  -5   4  855.51   61.49
  -1   5  -4  889.71   56.39
   1   5   4  867.41   58.89
   1   5   4  968.20   57.79
  -1   5  -4  936.81   55.79
   3  -5   4   68.29   12.30
  -3  -5  -4   63.39    9.50
   3  -5   4   58.39    8.40
   3  -5   4   58.29    8.70
  -3  -5  -4   59.09   10.70
  -3   5  -4   56.69    7.70
   3   5   4   55.29    9.10
   3   5   4   47.90   10.20
  -3   5  -4   74.59    9.00
   5  -5   4  346.87   27.70
  -5  -5  -4  333.27   24.80
  -5  -5  -4  389.76   27.40
   5   5   4  307.77   27.30
  -5   5  -4  377.76   25.30
   5   5   4  351.76   26.50
  -7  -5  -4  101.69   11.40
   7  -5   4   93.79    8.70
   7  -5   4   97.49   15.40
  -7  -5  -4   90.09   13.70
   7   5   4   90.29   14.20
   7   5   4   68.99   11.60
  -7   5  -4  104.89    8.60
  -7   5  -4   89.19   12.80
  -9  -5  -4   13.50    6.00
   9  -5   4    2.50    4.00
  -9  -5  -4    1.30    7.20
   9  -5   4    6.20    8.30
  -9   5  -4    2.40    4.90
   9   5   4   -0.60    5.10
  -9   5  -4    5.40    3.90
 -11  -5  -4   13.40    7.90
  11  -5   4   53.79   12.40
 -11  -5  -4   30.40    6.90
  11   5   4   35.60    9.90
 -11   5  -4   32.20    6.60
  11   5   4   48.30    8.30
  13  -5   4   59.69   14.70
 -13  -5  -4   33.10    8.10
  13   5   4   33.80   10.90
 -13   5  -4   28.00    7.90
  13   5   4   52.19    9.40
 -15  -5  -4  240.28   22.40
  15  -5   4  267.17   31.20
  15   5   4  256.07   23.10
  15   5   4  277.27   27.80
 -15   5  -4  234.08   31.30
 -17  -5  -4   27.70    9.00
  17  -5   4   33.20   15.80
  17   5   4   39.20   13.10
  17   5   4   42.80    9.90
 -17   5  -4   44.60   10.90
 -19  -5  -4   24.10    9.30
  19  -5   4   46.30   17.50
  19   5   4   40.20   14.80
  19   5   4   37.00   10.00
  21  -5   4  -10.80   14.60
  21   5   4  -10.90   12.30
  21   5   4    4.70   12.20
  23   5   4   30.50   14.30
  23   5   4   33.10   11.80
  26  -6  -4    3.10   11.50
  26  -6  -4    3.30   15.80
  26   6  -4    8.10   14.80
  24  -6  -4   13.10   12.90
  24  -6  -4   24.10   15.10
  24   6  -4   -0.70   13.40
  22  -6  -4  224.58   27.40
  22  -6  -4  276.47   30.60
  20  -6  -4  201.98   23.60
  20  -6  -4  231.08   25.10
  20   6  -4  145.29   25.30
  18  -6  -4  416.46   33.40
  18  -6  -4  385.06   33.30
  18   6  -4  368.16   34.30
  16  -6  -4  148.79   18.70
  16  -6  -4  149.59   19.30
  16   6  -4  111.39   19.90
 -14  -6   4    5.70    8.80
  14  -6  -4   35.30    8.70
  14   6  -4   21.80    8.90
 -14   6   4   26.30    6.90
  12  -6  -4   41.10    8.80
  12  -6  -4   72.09   12.60
 -12  -6   4   40.40    9.20
  12   6  -4   54.69    6.50
  12   6  -4   41.20    9.90
 -12   6   4   47.80    8.40
 -12   6   4   30.60    8.40
  10  -6  -4  213.58   18.60
  10  -6  -4  190.78   18.60
 -10  -6   4  200.68   17.80
 -10  -6   4  161.78   19.90
 -10   6   4  201.28   17.40
  10   6  -4  210.08   14.40
 -10   6   4  194.98   19.90
  -8  -6   4 1386.16   86.99
  -8  -6   4 1395.76   90.69
   8  -6  -4 1496.25   89.19
  -8  -6   4 1507.35   88.09
   8  -6  -4 1254.47   90.49
  -8   6   4 1435.26   87.99
   8   6  -4 1423.46   89.09
  -8   6   4 1471.05   88.59
   8   6  -4 1555.14   86.09
   6  -6  -4 1370.56   89.39
  -6  -6   4 1438.86   90.79
   6  -6  -4 1457.35   89.49
  -6  -6   4 1461.75   86.89
   6  -6  -4 1382.96   88.89
  -6  -6   4 1585.84   87.09
  -6   6   4 1462.35   89.09
   6   6  -4 1408.86   89.09
  -6   6   4 1491.65   88.79
   4  -6  -4  174.18   18.10
  -4  -6   4  191.68   16.40
   4  -6  -4  193.38   17.20
   4  -6  -4  201.18   17.40
  -4  -6   4  172.78   18.20
  -4  -6   4  230.28   15.80
  -4   6   4  174.08   17.20
  -4   6   4  201.88   16.40
   4   6  -4  225.58   14.60
   4   6  -4  201.88   17.50
  -2  -6   4  303.57   21.70
  -2  -6   4  244.58   19.10
  -2  -6   4  292.97   22.40
   2  -6  -4  283.27   21.60
   2  -6  -4  243.68   22.10
   2  -6  -4  279.37   21.60
   2   6  -4  254.17   20.60
   2   6  -4  272.47   19.00
  -2   6   4  253.07   21.30
   0  -6  -4  265.27   21.60
   0  -6  -4  248.68   22.40
   0  -6   4  329.27   22.40
   0  -6   4  244.08   19.50
   0  -6  -4  257.17   21.90
   0  -6   4  325.47   23.10
   0   6   4  299.07   22.20
   0   6  -4  253.57   19.60
   0   6  -4  265.87   20.50
   2  -6   4 1613.94   88.69
   2  -6   4 1452.75   90.49
   2  -6   4 1460.55   87.99
  -2  -6  -4 1413.76   88.69
  -2  -6  -4 1391.86   89.49
  -2  -6  -4 1419.06   89.79
   2   6   4 1543.95   89.49
   2   6   4 1469.85   91.49
  -2   6  -4 1363.46   87.39
  -2   6  -4 1404.36   87.99
   4  -6   4  363.86   25.30
   4  -6   4  329.97   28.30
  -4  -6  -4  348.97   25.20
   4  -6   4  374.36   28.70
   4   6   4  330.77   28.40
  -4   6  -4  343.77   25.10
   4   6   4  366.86   26.80
  -6  -6  -4  342.37   24.80
  -6  -6  -4  347.67   27.80
   6  -6   4  352.46   23.30
   6  -6   4  328.47   22.30
   6  -6   4  348.77   33.30
   6  -6   4  353.26   25.30
  -6   6  -4  336.47   21.90
   6   6   4  289.47   31.30
  -6   6  -4  351.96   25.40
   6   6   4  355.86   27.00
   8  -6   4   81.99   12.00
  -8  -6  -4   82.29   16.00
   8  -6   4   60.79   13.90
  -8  -6  -4   90.89   11.40
   8  -6   4   59.09    8.60
  -8   6  -4   80.49    8.60
   8   6   4   74.89   12.00
   8   6   4   65.09   12.30
  -8   6  -4   81.09   11.20
  10  -6   4  232.78   18.10
  10  -6   4  240.18   27.30
 -10  -6  -4  261.67   19.70
 -10   6  -4  206.68   17.80
  10   6   4  178.18   23.60
  10   6   4  266.17   25.20
 -12  -6  -4  280.87   22.60
  12  -6   4  269.27   22.10
  12  -6   4  314.27   32.10
  12   6   4  324.07   29.00
  12   6   4  302.27   27.00
 -12   6  -4  260.77   22.10
 -14  -6  -4  262.17   23.20
  14  -6   4  319.17   33.40
  14   6   4  259.17   29.30
  14   6   4  302.17   28.60
 -14   6  -4  271.07   23.70
  14   6   4  349.67   24.60
 -16  -6  -4   78.59   12.30
  16  -6   4  147.29   26.30
  16   6   4  112.69   22.30
 -16   6  -4  111.59   16.50
 -18  -6  -4   96.79   14.20
  18  -6   4  159.88   29.10
  18   6   4   85.79   17.20
  20  -6   4    4.30   16.00
  20   6   4   -3.10   12.70
  20   6   4   -1.40    8.50
  22  -6   4   12.30   17.90
  22   6   4   11.50    9.50
  22   6   4   29.80   16.50
  25  -7  -4  -18.80   11.10
  25  -7  -4  -15.20   14.90
  25   7  -4    4.20   13.30
  23  -7  -4   72.29   16.30
  23  -7  -4  136.19   23.70
  23   7  -4   93.79   17.90
  21  -7  -4  346.57   34.10
  21  -7  -4  422.86   36.00
  21   7  -4  358.66   36.30
  19  -7  -4  458.15   38.40
  19  -7  -4  520.35   39.20
  19   7  -4  454.05   40.20
  17  -7  -4  436.06   36.10
  17  -7  -4  441.16   35.50
  17   7  -4  433.16   37.50
  15  -7  -4   13.10   10.00
  15  -7  -4   13.60    8.90
  15   7  -4   24.20   10.30
 -13  -7   4   61.09   13.40
  13  -7  -4  114.79   15.90
  13   7  -4   84.59   17.20
 -13   7   4  100.19   13.30
  13   7  -4   85.99    9.50
 -13   7   4   63.79   12.10
  11  -7  -4  862.71   61.69
 -11  -7   4  781.02   52.29
 -11   7   4  761.12   51.19
  11   7  -4  805.92   48.70
 -11   7   4  760.12   52.39
  11   7  -4  760.42   53.39
  -9  -7   4 1978.80  118.99
   9  -7  -4 1956.10  121.89
  -9  -7   4 1935.11  124.39
   9  -7  -4 1976.70  123.29
   9  -7  -4 1943.01  121.59
  -9  -7   4 2050.09  121.19
   9   7  -4 2117.99  118.89
  -9   7   4 2033.10  121.69
  -9   7   4 1940.31  124.09
   9   7  -4 2001.90  122.09
   7  -7  -4 1654.33  106.29
   7  -7  -4 1730.93  106.49
  -7  -7   4 1671.63  103.89
  -7  -7   4 1789.12  111.69
   7  -7  -4 1663.23  106.59
   7   7  -4 1810.02  106.99
  -7   7   4 1788.82  107.39
   7   7  -4 1772.52  104.29
  -7   7   4 1742.13  105.59
   5  -7  -4  793.32   53.29
   5  -7  -4  847.52   53.89
  -5  -7   4  808.12   55.29
  -5  -7   4  791.42   51.69
   5  -7  -4  763.82   53.69
  -5  -7   4  863.51   51.59
  -5   7   4  891.61   54.49
   5   7  -4  842.22   53.59
   3  -7  -4   84.49   18.00
   3  -7  -4  104.99   12.50
  -3  -7   4  111.29   12.50
  -3  -7   4  121.49   10.90
  -3  -7   4  103.89   14.10
  -3   7   4   99.89   12.70
   3   7  -4  110.79   13.10
   1  -7  -4  255.87   30.20
  -1  -7   4  330.97   22.80
   1  -7  -4  337.97   25.00
  -1  -7   4  288.07   21.20
  -1  -7   4  358.16   26.10
  -1  -7   4  348.77   25.50
   1  -7  -4  349.96   29.70
  -1   7   4  332.87   25.00
   1   7  -4  309.17   23.80
   1  -7   4 3060.19  175.88
   1  -7   4 2840.72  172.48
   1  -7   4 2918.71  174.18
  -1  -7  -4 3042.70  178.28
  -1  -7  -4 2853.61  175.78
   1  -7   4 2776.02  176.38
  -1  -7  -4 2886.91  176.18
  -1   7  -4 3056.29  174.58
   1   7   4 2943.01  175.58
   1   7   4 3033.00  180.28
   3  -7   4 1769.82  114.79
  -3  -7  -4 1802.02  114.29
  -3  -7  -4 1776.12  112.69
   3  -7   4 1798.22  115.29
   3  -7   4 1928.71  112.89
   3  -7   4 1869.61  110.29
   3   7   4 2073.09  120.19
   3   7   4 1951.80  113.79
  -3   7  -4 1814.42  111.99
   5  -7   4 1416.06   84.99
   5  -7   4 1440.16   83.29
  -5  -7  -4 1380.56   85.49
   5  -7   4 1162.48   91.49
   5  -7   4 1474.65   85.99
  -5  -7  -4 1415.96   88.19
   5   7   4 1348.97   89.29
   5   7   4 1468.85   86.99
   7  -7   4  351.96   25.70
  -7  -7  -4  420.46   28.40
   7  -7   4  369.96   33.90
   7   7   4  398.16   31.60
  -7   7  -4  421.46   28.80
   7   7   4  368.86   32.90
   9  -7   4   -4.90    5.00
   9  -7   4   -4.00   10.80
   9   7   4    6.70    9.50
   9   7   4   -9.10    9.00
  -9   7  -4    3.30    4.80
  11  -7   4  106.49   18.90
  11  -7   4  108.69   13.50
 -11  -7  -4  154.98   15.50
  11   7   4  144.39   22.30
  11   7   4  128.89   19.70
 -11   7  -4  126.29   13.70
  13  -7   4  341.67   28.00
 -13  -7  -4  419.36   29.00
  13  -7   4  370.56   37.60
 -13   7  -4  438.26   28.90
  13   7   4  391.06   36.00
  13   7   4  411.06   34.20
 -15  -7  -4  632.64   46.10
  15  -7   4  729.63   57.09
 -15   7  -4  783.72   49.60
  15   7   4  736.13   53.89
  15   7   4  687.53   50.79
  17  -7   4  174.28   35.00
  17   7   4  127.59   23.20
  17   7   4  150.38   25.70
 -17   7  -4  167.38   19.40
  19  -7   4   14.90   17.10
  19   7   4   20.00   13.00
  19   7   4   24.90   13.80
  21  -7   4    5.40   17.60
  21   7   4   -9.00   13.20
  21   7   4  -13.90   12.50
  24  -8  -4    6.10   13.00
  24  -8  -4    2.30   13.80
  24   8  -4   17.20   14.30
  22  -8  -4   12.70   12.60
  22  -8  -4    0.60   12.60
  22   8  -4    9.10   12.90
  20  -8  -4  137.49   22.00
  18  -8  -4  118.49   19.80
  18   8  -4  125.69   23.40
  16  -8  -4  186.58   21.90
  16  -8  -4  194.78   23.40
  16   8  -4  173.08   15.40
  16   8  -4  184.98   25.20
  14  -8  -4  228.48   23.40
  14  -8  -4  212.98   23.80
  14   8  -4  209.78   17.50
  14   8  -4  199.58   25.10
  12  -8  -4   37.90   10.60
 -12  -8   4   68.89   18.20
  12   8  -4   63.79   12.00
  12   8  -4   50.29    8.60
 -12   8   4   44.10   10.90
 -10  -8   4  101.89   13.40
  10  -8  -4  139.99   16.30
  10  -8  -4  111.59   15.90
 -10  -8   4   88.69   15.20
  10   8  -4   99.49   12.60
 -10   8   4  108.39   13.60
 -10   8   4  110.09   15.80
  10   8  -4  130.49   18.20
  -8  -8   4  409.06   31.90
   8  -8  -4  497.25   34.50
   8   8  -4  476.35   32.20
   8   8  -4  487.15   35.60
  -8   8   4  470.75   34.30
  -8   8   4  471.25   33.10
   6  -8  -4  205.98   21.40
   6  -8  -4  158.38   16.40
  -6  -8   4  169.28   19.80
  -6  -8   4  145.59   14.60
  -6  -8   4  142.79   14.50
   6   8  -4  146.89   17.80
   6   8  -4  151.58   15.70
  -6   8   4  138.79   15.90
  -4  -8   4  128.39   14.50
   4  -8  -4  164.38   17.50
   4  -8  -4  180.58   16.80
  -4  -8   4  171.78   16.50
   4  -8  -4  212.08   18.90
  -4   8   4  143.29   16.40
   4   8  -4  158.78   17.30
   2  -8  -4   13.50   10.80
   2  -8  -4   16.80    7.70
  -2  -8   4   13.70    7.00
  -2  -8   4   17.30    4.20
   2  -8  -4   18.60    6.10
  -2  -8   4   11.40    5.40
  -2  -8   4   15.40    7.30
   2   8  -4   17.30    6.30
  -2   8   4    2.60    6.00
   0  -8   4  141.19   16.90
   0  -8   4  123.09   17.00
   0  -8  -4  136.89   16.10
   0  -8  -4  118.19   16.80
   0  -8   4  143.39   11.60
   0  -8  -4  129.99   15.50
   0   8   4  127.69   15.50
   0   8  -4  166.38   15.40
   2  -8   4   49.20    9.40
  -2  -8  -4   60.49   11.10
  -2  -8  -4   92.49   17.20
  -2  -8  -4   35.20    7.90
   2  -8   4   50.59   12.10
   2  -8   4   54.09    7.80
   2  -8   4   80.49   10.60
   2   8   4   52.59   10.10
  -2   8  -4   66.19   11.60
   2   8   4   28.30   10.80
   4  -8   4   41.20    8.10
  -4  -8  -4   51.39    9.00
   4  -8   4   42.80   12.60
   4   8   4   60.49   10.80
   4   8   4   30.00   11.80
   6  -8   4  212.58   15.60
   6  -8   4  173.88   24.80
   6  -8   4  177.68   18.00
  -6  -8  -4  200.38   18.90
   6   8   4  201.18   20.60
   6   8   4  154.48   23.80
  -8  -8  -4  136.89   15.90
   8  -8   4  170.68   15.50
   8  -8   4  132.99   13.00
   8  -8   4  135.79   23.70
   8   8   4  148.59   19.00
  -8   8  -4  120.19   12.10
   8   8   4  107.29   22.30
  10  -8   4   10.30   12.10
 -10  -8  -4   15.30    7.90
 -10   8  -4   12.90    5.80
  10   8   4   -9.50   10.20
  10   8   4   11.50   10.40
  12  -8   4   52.59   15.80
 -12  -8  -4   51.09    9.40
 -12   8  -4   56.09    8.80
  12   8   4   51.69   13.40
  12   8   4   42.30   13.20
  14  -8   4    5.80    6.70
  14  -8   4   18.60   15.60
  14   8   4   25.20   12.60
  14   8   4    8.80   11.10
 -14   8  -4   41.50    8.70
  16   8   4  242.98   31.20
 -16   8  -4  286.37   24.00
  16   8   4  257.07   28.50
  18  -8   4   44.90   17.90
  18   8   4   57.79   15.30
  18   8   4   41.60   20.30
  20  -8   4    7.60   18.40
  20   8   4  -10.00   12.10
  20   8   4   13.10   14.20
  23  -9  -4   11.70   14.40
  23  -9  -4   19.10   14.80
  23   9  -4   18.10   13.20
  21  -9  -4   12.60   13.60
  21  -9  -4   13.00   13.60
  21   9  -4   14.00   12.80
  19  -9  -4  -14.30   10.60
  19  -9  -4    6.50   11.60
  19   9  -4   14.40   13.50
  17  -9  -4   10.60   10.60
  17  -9  -4    2.40    9.80
  17   9  -4   -0.20   10.20
  17   9  -4   -6.30    6.30
  15  -9  -4   14.10    9.30
  15  -9  -4   10.30   10.10
  15   9  -4   15.10   10.10
  13  -9  -4    5.50    9.40
  13  -9  -4   24.70    9.50
  13   9  -4  -10.50    6.80
 -13   9   4   -5.60    8.70
  13   9  -4   18.70   10.80
  11  -9  -4    6.60    8.60
 -11   9   4   19.00   10.60
  11   9  -4   13.70    8.00
  11   9  -4   19.70    9.90
  -9  -9   4   15.00    8.70
   9  -9  -4   14.50    8.70
  -9   9   4   16.70    8.80
   9   9  -4   24.80    9.90
   9   9  -4   29.90    8.50
   7  -9  -4  410.26   31.30
  -7  -9   4  399.36   29.10
  -7  -9   4  377.26   28.00
   7   9  -4  415.56   32.10
  -7   9   4  376.46   30.70
   7   9  -4  375.76   29.20
  -5  -9   4   76.19   11.90
  -5  -9   4   88.29   17.10
   5  -9  -4   91.29   13.80
  -5  -9   4   44.60    9.30
  -5   9   4   66.59   11.20
   5   9  -4   62.99   11.80
  -3  -9   4   -6.20    8.50
  -3  -9   4   -8.20    8.20
  -3  -9   4   11.30    8.60
   3  -9  -4   11.30    6.70
   3   9  -4    9.80    8.20
  -3   9   4    3.40    7.30
   1  -9  -4   18.20    8.10
  -1  -9   4   -1.40    9.20
  -1  -9   4    8.40    4.40
  -1  -9   4    3.50    6.70
   1   9  -4   19.70    7.30
  -1   9   4   16.30    8.20
  -1  -9  -4   39.70    9.50
   1  -9   4   32.70    5.80
   1  -9   4   35.30   15.80
   1  -9   4   24.30    7.90
   1  -9   4   46.90   11.30
   1   9   4   46.10   10.30
   1   9   4   33.60   11.50
  -1   9  -4   25.30    8.00
   3  -9   4  128.69   21.30
  -3  -9  -4  147.19   16.80
   3  -9   4   98.39   11.40
   3   9   4  121.09   20.60
  -3   9  -4   87.89   14.60
   3   9   4  128.39   16.80
   5  -9   4   96.39   14.50
  -5  -9  -4   72.39   11.60
   5  -9   4   69.09    9.70
   5  -9   4   76.49   15.50
   5   9   4   59.39   11.90
   5   9   4   51.79   14.00
   7  -9   4  189.38   24.90
   7  -9   4  149.29   14.20
  -7  -9  -4  148.89   18.40
   7   9   4  152.48   24.90
   7   9   4  154.58   20.40
  -9  -9  -4    7.10    7.80
   9  -9   4    9.80    6.60
   9  -9   4   13.40    6.10
   9  -9   4   19.40   13.20
   9   9   4  -10.60   10.70
   9   9   4   19.80   11.00
  11  -9   4   39.80    7.60
  11  -9   4   61.99   16.40
 -11  -9  -4   43.00    8.80
  11   9   4   36.00   12.50
  11   9   4   31.10   13.10
  13  -9   4  134.19   16.00
  13  -9   4  205.38   30.00
 -13   9  -4  152.08   16.40
  13   9   4  175.48   26.60
  13   9   4  183.48   22.80
  15  -9   4   63.59   19.60
  15  -9   4   21.60    8.50
  15   9   4   23.80   16.10
  15   9   4   51.29   14.10
 -15   9  -4    1.70   15.40
  17  -9   4   12.60   16.70
  17   9   4   22.90   15.00
  17   9   4   52.39   14.80
 -17   9  -4   38.20   11.50
  19  -9   4  -17.40   17.30
  19   9   4   -4.30   12.40
  19   9   4  -16.00   13.00
  20 -10  -4  156.38   25.90
  20 -10  -4  205.08   27.50
  20  10  -4  175.48   28.60
  18 -10  -4   75.79   16.40
  18  10  -4   75.89   16.10
  16 -10  -4   96.59   20.00
  16 -10  -4   66.79   14.50
  16  10  -4   78.49   21.20
  16  10  -4   82.69   12.30
  14 -10  -4    7.50    8.60
  14 -10  -4   -8.00    9.00
  14  10  -4   -2.20    9.00
  14  10  -4  -12.00    6.60
  12 -10  -4   49.50    9.80
  12 -10  -4   32.10   11.10
  12  10  -4   50.19    9.70
  12  10  -4   45.90   12.30
 -10 -10   4  440.56   34.70
  10 -10  -4  430.16   36.30
  10  10  -4  531.15   34.20
 -10  10   4  410.76   36.40
  10  10  -4  489.85   38.10
  -8 -10   4  477.75   34.10
   8 -10  -4  444.26   35.40
  -8  10   4  404.06   35.00
   8  10  -4  453.15   33.20
   8  10  -4  440.36   36.20
   6 -10  -4 1386.46   92.09
  -6 -10   4 1344.17   89.29
  -6 -10   4 1518.95   92.99
   6  10  -4 1582.84   92.99
  -6  10   4 1429.06   91.99
  -4 -10   4  440.76   37.90
  -4 -10   4  617.34   37.80
   4 -10  -4  483.95   38.70
  -4  10   4  490.65   38.60
   4  10  -4  568.84   39.90
  -2 -10   4   49.90   10.40
  -2 -10   4   74.29   15.00
  -2 -10   4   48.70   13.70
   2 -10  -4   94.89   14.60
  -2 -10   4   49.10    8.60
   2  10  -4   57.19   11.50
  -2  10   4   67.29   12.70
   0 -10  -4  430.06   31.90
   0 -10   4  413.46   34.90
   0 -10   4  390.46   33.10
   0 -10   4  332.27   26.50
   0  10  -4  360.96   31.30
   0  10   4  369.46   30.90
   2 -10   4  802.42   49.60
   2 -10   4  792.02   56.29
  -2 -10  -4  808.02   53.99
   2 -10   4  806.32   54.99
  -2  10  -4  783.32   53.09
   2  10   4  710.43   56.59
   2  10   4  721.13   52.59
   4 -10   4  783.62   48.30
   4 -10   4  772.32   52.29
  -4 -10  -4  762.52   51.29
   4 -10   4  806.12   56.29
  -4 -10  -4  748.73   52.59
   4  10   4  713.93   51.69
   4  10   4  683.13   55.39
   6 -10   4  413.96   32.80
   6 -10   4  451.35   29.80
   6 -10   4  419.66   38.50
  -6 -10  -4  450.85   33.00
   6  10   4  385.16   38.30
   6  10   4  429.66   34.40
   8 -10   4    1.90   11.50
  -8 -10  -4  -11.10    8.40
   8 -10   4   -7.90    5.30
   8 -10   4   -7.90    7.00
   8  10   4  -12.10    8.90
  10 -10   4    3.70    6.80
  10 -10   4   -1.50   11.90
 -10 -10  -4    6.50    7.80
  10 -10   4   -1.00    6.30
  10  10   4    6.70   10.70
  10  10   4    1.80   12.00
  12 -10   4  303.57   25.20
  12 -10   4  332.17   41.80
  12  10   4  325.77   37.60
  12  10   4  324.37   30.90
 -12  10  -4  368.46   25.20
  14 -10   4  280.17   36.00
 -14  10  -4  247.08   22.80
  14  10   4  275.87   27.90
  14  10   4  284.07   32.60
  16 -10   4   35.60   21.40
  16  10   4   45.40   14.50
  16  10   4   39.70   15.20
 -16  10  -4   24.60   10.60
  19 -11  -4  155.18   27.10
  19  11  -4  140.79   28.30
  17 -11  -4   37.30   15.80
  17 -11  -4   60.79   13.80
  17  11  -4   81.09   13.10
  17  11  -4   45.70   15.10
  15 -11  -4  -15.10   10.50
  15 -11  -4    6.50   10.10
  15  11  -4    4.20   10.90
  15  11  -4    1.70    8.70
  13 -11  -4   15.80   10.50
  13 -11  -4   33.70   10.60
 -13  11   4   21.70   14.20
  13  11  -4   20.70   12.60
  13  11  -4   25.00    9.30
  11 -11  -4  396.36   32.20
  11 -11  -4  383.46   33.50
  11  11  -4  432.46   31.10
  11  11  -4  397.46   35.40
 -11  11   4  323.87   33.20
   9 -11  -4  226.38   24.00
  -9 -11   4  186.98   23.60
  -9  11   4  202.68   24.70
   9  11  -4  255.97   26.50
   9  11  -4  285.67   29.20
   7 -11  -4  433.96   34.70
  -7 -11   4  419.46   31.30
  -7 -11   4  414.86   33.40
  -7  11   4  390.26   34.60
   7  11  -4  468.25   36.30
   5 -11  -4  264.57   25.20
  -5 -11   4  303.17   28.10
  -5 -11   4  251.07   24.30
  -5  11   4  228.18   25.40
   5  11  -4  265.47   27.00
   3 -11  -4   40.30   10.10
  -3 -11   4   21.30   12.10
  -3 -11   4   45.90    9.00
  -3  11   4   55.09   12.00
   3  11  -4   41.80   11.70
  -1 -11   4   91.19   12.80
   1 -11  -4  149.99   18.80
  -1 -11   4  110.39   20.80
  -1  11   4  123.19   18.10
   1  11  -4   94.69   15.10
   1 -11   4  214.98   19.80
   1 -11   4  259.97   27.60
  -1 -11  -4  280.07   25.80
   1  11   4  280.27   25.10
  -1  11  -4  204.58   24.30
   3 -11   4  449.16   33.90
   3 -11   4  516.65   42.20
  -3 -11  -4  508.55   39.30
   3 -11   4  515.65   39.70
  -3 -11  -4  499.15   37.90
   3  11   4  520.55   38.50
   3  11   4  485.05   42.50
   5 -11   4  522.75   34.40
  -5 -11  -4  537.95   39.60
   5 -11   4  470.05   38.80
  -5 -11  -4  512.95   38.60
   5 -11   4  498.25   43.00
   5  11   4  479.65   43.10
   5  11   4  475.85   38.30
   7 -11   4  226.98   19.30
   7 -11   4  192.68   28.00
  -7 -11  -4  230.78   23.40
   7 -11   4  225.58   30.10
   7  11   4  237.58   29.70
   7  11   4  226.18   24.70
  -9 -11  -4    6.50    9.20
   9 -11   4   -3.10    6.30
   9 -11   4  -12.60   13.00
   9 -11   4  -15.10    8.70
   9  11   4   -6.40   10.20
   9  11   4   -9.80   16.30
  11 -11   4    0.70    8.50
  11 -11   4   10.60    7.20
  11 -11   4  -20.80   16.50
  11  11   4   35.60   12.90
  11  11   4    9.90   12.20
  13 -11   4   68.69   20.50
  13 -11   4  108.19   15.40
  13  11   4  162.98   27.20
  13  11   4  160.98   22.60
  15  11   4  132.79   27.80
  15  11   4  158.18   23.50
  16 -12  -4    6.50   13.60
  16 -12  -4   -0.90   12.40
  16  12  -4    8.10   13.30
  14 -12  -4   23.80   12.50
  14 -12  -4   34.20   12.60
  14  12  -4   36.60   13.40
  14  12  -4   27.90   13.60
  12 -12  -4   20.70   12.10
  12 -12  -4   44.80   17.30
  12  12  -4   14.10   11.60
 -12  12   4   19.60   13.10
  12  12  -4   20.70   13.10
  10 -12  -4   -0.40   10.30
 -10 -12   4  -17.10   13.20
  10 -12  -4   23.80    9.80
  10  12  -4    3.80   10.30
 -10  12   4   16.10   14.20
   8 -12  -4   -3.30    7.50
   8 -12  -4    5.50    8.40
   8  12  -4    1.70    9.60
  -8  12   4    6.40   10.50
   6 -12  -4   45.30   11.50
  -6 -12   4   18.30   10.80
  -6  12   4   33.30   11.80
   6  12  -4   44.70   12.10
  -4 -12   4    5.30    5.80
   4 -12  -4   -2.60    8.30
  -4  12   4    0.30    9.30
   4  12  -4    3.70    8.60
  -2 -12   4   86.99   12.40
  -2 -12   4   89.49   15.80
   2 -12  -4   86.69   15.30
   2  12  -4   90.69   18.60
  -2  12   4   76.89   14.30
   0 -12   4    3.00    5.90
   0 -12   4    7.60   10.30
   0 -12  -4    3.00    8.60
   0  12  -4   -6.20    7.90
   0  12   4   -8.50    8.90
   2 -12   4   22.40    7.70
   2 -12   4   22.70   13.00
  -2 -12  -4   29.80   11.60
   2  12   4   22.90   11.30
   4 -12   4   25.70    7.80
  -4 -12  -4   34.00   11.20
  -4 -12  -4   27.10   11.50
   4 -12   4   36.10   15.40
   4  12   4   17.00   13.00
   4  12   4   26.20   11.10
   6 -12   4   18.10   15.30
  -6 -12  -4   28.50   10.60
   6 -12   4    2.80   11.00
   6 -12   4   37.70    8.20
   6  12   4   25.20   12.20
   6  12   4   -1.20   17.10
   8 -12   4  -13.90   11.20
  -8 -12  -4   37.30   11.30
   8 -12   4   29.00    7.60
   8 -12   4    8.20   17.40
   8  12   4   17.60   11.50
   8  12   4    8.10   13.30
  10 -12   4   -3.30    7.10
  10 -12   4  -20.40   15.30
  10  12   4   -7.60   13.40
  10  12   4   14.40   12.50
  12 -12   4   25.70   18.30
  12 -12   4   35.30   11.30
  12 -12   4   32.30    8.60
  12  12   4   61.59   17.20
  12  12   4   61.19   15.30
  13 -13  -4    9.10   13.40
  13 -13  -4   16.50   12.80
  13  13  -4   27.70   14.00
  11 -13  -4   19.80   12.30
  11 -13  -4   21.60   13.10
 -11  13   4   33.70   12.60
  11  13  -4   29.80   13.20
   9 -13  -4  182.28   29.60
   9 -13  -4  125.49   21.70
   9  13  -4  125.79   24.00
  -9  13   4   87.09   17.90
   7 -13  -4  573.54   41.60
   7 -13  -4  526.85   39.60
  -7 -13   4  438.76   37.00
  -7 -13   4  531.35   37.40
  -7  13   4  424.96   39.90
   7  13  -4  493.85   43.60
   5 -13  -4   85.39   15.80
  -5 -13   4   52.29   10.60
   5 -13  -4   45.20   13.10
   5  13  -4   55.59   14.10
  -5  13   4   57.39   15.80
  -3 -13   4   46.50    9.50
  -3  13   4   30.50   13.80
   3  13  -4   42.70   12.60
  -1 -13   4   18.30   13.50
  -1 -13   4   68.29   14.70
   1 -13  -4   38.90   12.40
  -1  13   4   47.10   13.00
   1  13  -4   45.20   13.10
   1 -13   4  168.08   16.70
  -1 -13  -4  136.39   21.90
   1 -13   4  118.49   20.60
  -1  13  -4  167.98   22.50
   1  13   4  136.29   21.30
  -3 -13  -4  159.78   24.00
   3 -13   4  170.88   17.00
   3 -13   4  141.39   26.60
   3  13   4  128.29   21.70
  -5 -13  -4   90.39   15.70
   5 -13   4  100.09   14.30
   5 -13   4  104.49   21.20
  -5 -13  -4  128.69   28.30
   5  13   4   77.59   19.00
   5  13   4   90.69   16.90
  -7 -13  -4   41.20   16.50
   7 -13   4   82.49   13.30
   7 -13   4   24.20   21.70
  -7 -13  -4   64.09   14.20
   7  13   4   49.20   14.60
   7  13   4   25.10   15.50
   9 -13   4   -6.70    7.20
  -9 -13  -4    8.00   11.70
   9 -13   4   -0.40   16.30
   9  13   4  -10.90   14.30
   9  13   4   16.70   13.70
  10 -14  -4   99.69   18.90
  10  14  -4  139.99   25.70
 -10  14   4   94.69   18.80
  -8 -14   4  301.97   27.20
   8 -14  -4  283.87   29.00
  -8 -14   4  245.48   25.10
   8 -14  -4  271.97   30.30
   8  14  -4  307.07   32.40
  -8  14   4  242.38   29.80
  -6 -14   4   53.59   12.10
   6 -14  -4   60.29   14.70
   6 -14  -4   77.49   17.30
   6  14  -4   73.59   15.60
  -6  14   4   80.99   16.80
   4 -14  -4   35.10   12.00
  -4 -14   4   42.90   10.70
  -4 -14   4   15.00   12.10
   4 -14  -4   58.59   14.50
   4  14  -4   33.80   23.80
  -4  14   4   66.09   15.30
   2 -14  -4    5.70    9.30
   2 -14  -4   -3.70   10.70
  -2 -14   4    2.90    7.60
  -2 -14   4   -0.20   12.20
  -2  14   4    0.70   11.10
   2  14  -4    5.60   10.80
   0 -14   4   44.40   10.00
   0 -14  -4   46.50   23.20
   0 -14   4   45.70   16.00
   0  14   4   80.69   15.80
   0  14  -4   51.29   13.80
  -2 -14  -4  367.76   28.90
  -2 -14  -4  376.86   34.50
   2 -14   4  283.77   35.60
   2  14   4  366.76   33.40
   4 -14   4  163.68   31.50
  -4 -14  -4  208.88   27.20
  -4 -14  -4  234.48   20.80
   4 -14   4  183.58   20.00
   4  14   4  217.18   25.60
  -6 -14  -4   42.10   15.70
   6 -14   4   61.99   19.70
  -6 -14  -4   85.79   13.50
   6 -14   4   50.79   10.20
   6  14   4   24.40   15.80
   6  14   4   55.49   15.30
  28   0  -5    4.90   13.40
  28   0  -5   26.90   13.50
  26   0  -5   36.30   15.80
  26   0  -5   86.99   15.20
  26   0  -5   65.09   15.20
  24   0  -5   42.40   12.40
  24   0  -5   26.10   11.50
  24   0  -5   17.50   11.00
  24   0  -5    4.20   11.70
  22   0  -5  141.39   15.30
  22   0  -5  154.28   19.70
  22   0  -5  152.28   20.00
  22   0  -5  146.59   21.00
  20   0  -5   -4.60    7.70
  20   0  -5   11.70    6.30
  20   0  -5  -13.60    7.80
  18   0  -5    5.50    5.40
  18   0  -5   -1.20    6.90
  16   0  -5    5.60    4.00
  16   0  -5   -2.90    5.40
 -16   0   5   -3.60    5.70
  14   0  -5   57.09    9.30
  14   0  -5   56.99    8.40
 -14   0   5   56.99    9.80
  12   0  -5    5.90    5.10
  12   0  -5    3.40    3.60
 -12   0   5    7.80    4.70
  10   0  -5   86.59    9.60
 -10   0   5   74.59    9.40
  10   0  -5   71.29    7.30
 -10   0   5   63.79    6.60
  -8   0   5  450.25   29.40
   8   0  -5  461.75   29.40
   8   0  -5  424.76   27.60
  -6   0   5  639.64   38.20
  -6   0   5  570.54   37.00
   6   0  -5  615.34   38.00
  -4   0   5   16.60    3.50
   4   0  -5   19.40    5.10
   4   0  -5   17.00    3.50
  -4   0   5   14.00    3.90
  -2   0   5  281.07   19.90
  -2   0   5  283.97   18.30
   2   0  -5  277.37   18.30
   0   0  -5  114.99    8.70
   0   0  -5  112.19   10.50
   0   0   5  115.19   10.90
   2   0   5  186.88   15.40
  -2   0  -5  196.08   15.10
  -2   0  -5  179.68   13.00
  -4   0  -5    0.90    3.90
   4   0   5    0.20    4.40
  -4   0  -5    3.60    2.70
  -6   0  -5   10.00    5.00
   6   0   5    9.00    3.30
   6   0   5    8.60    6.10
  -6   0  -5   10.60    3.40
  -8   0  -5  133.49   14.20
   8   0   5  137.39   15.80
   8   0   5  154.78   12.50
  -8   0  -5  142.89   12.00
 -10   0  -5  164.08   15.30
 -10   0  -5  183.78   17.20
  10   0   5  176.68   14.90
  10   0   5  163.48   18.20
  12   0   5  190.98   20.70
  12   0   5  167.48   16.50
 -12   0  -5  178.78   19.30
 -12   0  -5  193.58   21.80
  14   0   5   33.10   11.70
 -14   0  -5   42.00    9.90
 -14   0  -5   42.00   10.60
  14   0   5   38.20    8.90
  16   0   5   -1.40   11.00
  18   0   5   24.80   13.30
  18   0   5   13.70    9.80
  20   0   5   79.29   16.70
  20   0   5   63.59   12.20
  22   0   5   96.09   18.10
  22   0   5   61.89   14.60
  27  -1  -5   -6.90   14.40
  27  -1  -5   45.40   14.20
  27   1  -5   29.90   13.50
  27   1  -5   59.09   11.50
  27   1  -5   14.90   12.10
  25  -1  -5  164.38   24.20
  25  -1  -5  111.49   17.20
  25   1  -5  121.19   21.20
  25   1  -5  122.19   23.40
  23  -1  -5  105.19   15.20
  23  -1  -5  143.09   19.00
  23  -1  -5  101.39   19.50
  23   1  -5  110.09   20.90
  23   1  -5  137.39   14.60
  23   1  -5   83.49   15.80
  21  -1  -5  185.58   21.10
  21  -1  -5  203.48   21.40
  21   1  -5  139.49   20.00
  21   1  -5  210.18   16.70
  21   1  -5  193.28   19.20
  19  -1  -5   -2.60    6.00
  19  -1  -5   -1.60    7.60
  19   1  -5    4.50    7.30
  19   1  -5    2.30    4.80
  19   1  -5   -2.90    7.30
  19   1  -5   -5.40    5.80
 -17  -1   5    7.60   11.80
  17  -1  -5   19.10    8.20
 -17   1   5   14.70   10.30
  17   1  -5   14.90    6.40
  17   1  -5   30.30    5.50
  17   1  -5   25.90    8.10
  15  -1  -5 1818.62  104.59
 -15  -1   5 1635.74  106.79
  15  -1  -5 1690.23  108.89
  15   1  -5 1844.72  103.19
  15   1  -5 1791.72  108.69
 -15   1   5 1650.93  106.79
  13  -1  -5 1513.65   94.59
  13  -1  -5 1616.84   92.79
 -13  -1   5 1474.25   94.59
 -13   1   5 1531.45   94.79
  13   1  -5 1532.95   94.19
  13   1  -5 1590.04   91.29
 -11  -1   5 2856.91  169.28
  11  -1  -5 2787.02  169.08
  11  -1  -5 2943.01  167.78
 -11   1   5 2802.62  169.28
  11   1  -5 2733.43  168.48
 -11   1   5 2824.52  166.98
  11   1  -5 2962.10  165.98
   9  -1  -5  736.73   42.90
  -9  -1   5  678.93   42.50
   9  -1  -5  600.64   40.90
  -9   1   5  680.33   42.60
  -9   1   5  644.04   40.60
   9   1  -5  643.24   41.90
  -7  -1   5 1152.28   67.79
   7  -1  -5 1008.00   66.79
   7  -1  -5 1092.09   67.89
  -7  -1   5 1224.78   65.69
   7   1  -5 1050.89   67.29
   7   1  -5 1234.08   67.59
  -7   1   5 1045.90   67.79
  -5  -1   5  559.94   36.60
   5  -1  -5  605.54   37.00
   5  -1  -5  550.64   37.00
   5  -1  -5  636.64   37.90
   5   1  -5  571.54   36.50
  -5   1   5  633.44   36.90
   5   1  -5  556.34   37.00
  -5   1   5  623.94   37.30
  -3  -1   5 1375.26   83.69
   3  -1  -5 1325.57   83.09
   3  -1  -5 1356.36   84.09
  -3  -1   5 1391.46   82.49
  -3   1   5 1457.05   84.29
   3   1  -5 1409.76   83.69
  -3   1   5 1389.96   83.99
   3   1  -5 1381.56   82.49
  -3   1   5 1469.05   83.49
  -1  -1   5  693.13   45.40
   1  -1  -5  745.03   45.70
   1  -1  -5  721.43   44.50
  -1  -1   5  745.63   43.40
   1   1  -5  714.03   45.40
  -1   1   5  747.43   45.70
   1   1  -5  726.83   43.50
  -1  -1  -5  225.38   14.70
   1  -1   5  175.68   15.50
  -1  -1  -5  192.08   15.30
   1   1   5  189.38   15.50
  -1   1  -5  202.18   15.40
  -3  -1  -5  488.05   31.00
   3  -1   5  463.15   32.60
  -3  -1  -5  508.35   32.30
   3   1   5  487.25   32.40
  -3   1  -5  487.95   32.20
  -5  -1  -5  271.87   21.10
   5  -1   5  295.47   22.40
   5   1   5  272.77   21.60
  -5   1  -5  295.87   21.50
   5   1   5  292.07   20.10
  -7  -1  -5  436.26   31.60
  -7  -1  -5  400.06   30.30
   7  -1   5  465.45   33.30
  -7   1  -5  474.25   32.20
   7   1   5  450.55   32.40
  -7   1  -5  529.55   30.40
   7   1   5  507.55   31.30
   9  -1   5  737.23   49.20
  -9  -1  -5  691.13   47.50
  -9  -1  -5  622.74   46.10
   9   1   5  697.13   48.20
   9   1   5  810.92   47.40
  -9   1  -5  761.82   48.20
  -9   1  -5  817.92   46.60
  11  -1   5 1433.56   88.99
 -11  -1  -5 1324.07   86.99
 -11  -1  -5 1219.68   85.39
  11   1   5 1487.45   86.79
 -11   1  -5 1454.45   86.19
  11   1   5 1379.96   87.79
 -11   1  -5 1572.74   90.69
 -13  -1  -5  457.65   40.30
 -13  -1  -5  538.65   37.40
  13  -1   5  553.94   35.00
  13  -1   5  581.14   40.60
  13   1   5  533.45   39.30
  13   1   5  508.55   37.30
 -13   1  -5  536.75   38.20
  15  -1   5   42.80    7.90
  15  -1   5   25.00   11.80
 -15  -1  -5   24.90    9.60
  15   1   5   25.00   11.00
  15   1   5   34.00   10.40
 -15   1  -5   24.70    9.00
  17  -1   5   45.80    9.20
  17  -1   5   64.09   14.70
  17   1   5   52.69   13.10
  17   1   5   46.00   11.20
  19  -1   5  199.88   20.30
  19   1   5  237.98   27.00
  21  -1   5  166.08   19.30
  21   1   5  194.58   27.10
  21   1   5  159.38   22.20
  23  -1   5   36.70   17.20
  23  -1   5   37.60   10.30
  23   1   5   35.00   12.40
  23   1   5   52.29   16.20
  28  -2  -5    8.70   11.60
  28  -2  -5  -20.10   13.20
  28  -2  -5   -0.70   10.50
  28   2  -5   14.70   12.40
  28   2  -5   -7.30   17.00
  26  -2  -5  125.29   20.70
  26  -2  -5  164.08   24.90
  26   2  -5  151.28   25.70
  26   2  -5  128.79   15.30
  24  -2  -5  125.79   21.70
  24  -2  -5  128.99   19.80
  24   2  -5  115.09   17.30
  24   2  -5  130.59   14.00
  22  -2  -5  169.58   20.60
  22  -2  -5  119.99   19.40
  22  -2  -5  180.98   17.70
  22   2  -5  128.79   17.30
  22   2  -5  121.29   13.60
  22   2  -5  159.98   23.20
  20  -2  -5   -0.10    9.80
  20  -2  -5    5.30    8.60
  20  -2  -5   -3.80    8.70
  20   2  -5   11.00    5.40
  20   2  -5   -3.40    8.10
  18  -2  -5  204.58   21.00
  18  -2  -5  222.38   19.00
  18   2  -5  213.58   22.50
  18   2  -5  168.48   16.90
  18   2  -5  226.88   20.50
 -16  -2   5 1621.34  104.49
  16  -2  -5 1703.33  104.59
  16  -2  -5 1832.22  102.89
  16   2  -5 1659.03  107.09
 -16   2   5 1663.03  104.79
  16   2  -5 1668.13  103.59
  14  -2  -5 3166.48  191.08
 -14  -2   5 2945.41  194.98
  14  -2  -5 3488.45  189.78
  14   2  -5 3193.28  190.28
  12  -2  -5 5001.00  284.37
 -12  -2   5 4696.93  285.27
  12  -2  -5 4982.40  285.77
  12   2  -5 4754.12  284.67
 -12   2   5 4690.73  285.57
 -12   2   5 4953.20  283.77
  10  -2  -5  880.01   52.49
 -10  -2   5  841.62   53.09
  10  -2  -5  797.82   53.39
  10   2  -5  847.52   52.79
  10   2  -5  843.52   51.59
 -10   2   5  833.32   53.39
 -10   2   5  871.31   51.99
  -8  -2   5 2086.99  124.29
   8  -2  -5 1945.41  124.59
   8  -2  -5 2107.49  124.09
  -8   2   5 2095.19  124.79
  -8   2   5 2300.87  123.89
   8   2  -5 1977.60  123.19
   8   2  -5 2107.49  123.89
   6  -2  -5  592.44   38.70
   6  -2  -5  572.64   38.20
  -6  -2   5  615.04   39.00
  -6  -2   5  688.53   38.10
   6   2  -5  667.33   37.90
  -6   2   5  567.34   37.80
   6   2  -5  574.24   37.50
  -6   2   5  579.54   38.40
   4  -2  -5  384.06   26.30
  -4  -2   5  409.26   26.10
   4  -2  -5  394.86   26.30
  -4  -2   5  404.46   24.90
  -4   2   5  396.06   26.00
   4   2  -5  399.16   24.70
   4   2  -5  405.66   25.90
  -4   2   5  383.96   26.10
   2  -2  -5 2682.43  168.28
  -2  -2   5 2748.12  167.98
  -2  -2   5 2848.52  166.08
   2  -2  -5 2772.32  167.78
  -2   2   5 2881.61  167.68
  -2   2   5 2946.41  168.18
   2   2  -5 2853.61  165.88
   2   2  -5 3061.99  169.08
   0  -2  -5 3903.41  238.08
   0  -2   5 4126.19  238.78
   0  -2  -5 4100.49  238.78
   0  -2  -5 4030.30  237.98
   0   2   5 4086.29  238.78
   0   2  -5 4127.79  238.38
  -2  -2  -5  579.34   36.50
  -2  -2  -5  571.24   37.10
   2  -2   5  568.44   37.60
   2   2   5  576.04   37.20
  -2   2  -5  566.24   36.90
  -4  -2  -5  230.38   18.10
  -4  -2  -5  258.17   17.80
   4  -2   5  228.98   19.30
   4   2   5  232.98   18.40
  -4   2  -5  230.08   18.10
  -4   2  -5  238.18   15.20
   4   2   5  208.98   17.70
   6  -2   5 1569.64   94.79
  -6  -2  -5 1488.75   93.29
  -6  -2  -5 1628.94   93.19
  -6   2  -5 1500.15   93.69
   6   2   5 1566.14   93.59
   6   2   5 1482.95   93.49
  -6   2  -5 1526.65   92.69
   8  -2   5 2770.42  169.48
  -8  -2  -5 3000.20  167.98
  -8  -2  -5 2754.72  167.88
  -8   2  -5 2888.91  166.38
  -8   2  -5 2719.33  168.28
   8   2   5 2646.44  167.98
   8   2   5 2967.60  168.38
 -10  -2  -5 2625.04  160.28
  10  -2   5 2842.32  163.78
 -10  -2  -5 2562.64  159.98
 -10   2  -5 2612.24  161.28
  10   2   5 2855.91  160.98
  10   2   5 2536.65  160.48
 -10   2  -5 2740.93  159.08
  12  -2   5 2637.64  155.98
 -12  -2  -5 2536.65  153.48
 -12  -2  -5 2494.35  153.18
 -12   2  -5 2598.94  152.58
 -12   2  -5 2547.65  154.08
  12   2   5 2559.84  153.88
  12   2   5 2496.05  153.78
 -14  -2  -5  527.35   40.70
 -14  -2  -5  596.44   49.99
  14  -2   5  679.93   45.70
 -14   2  -5  605.74   42.20
  14   2   5  607.04   42.90
  14   2   5  563.94   42.10
  16  -2   5   55.19   14.30
 -16  -2  -5   28.80    9.40
 -16   2  -5   23.90   10.30
  16   2   5   36.50   11.20
  16   2   5   23.60   10.40
  18  -2   5  100.99   18.30
  18   2   5   99.79   15.80
  18   2   5   83.79   16.00
  20  -2   5   36.80   15.40
  20   2   5   37.20   14.00
  20   2   5   29.90   12.10
  22  -2   5   58.79   19.50
  22   2   5   63.89   15.90
  22   2   5   38.00   12.90
  27  -3  -5   92.09   17.70
  27  -3  -5   66.79   18.20
  27   3  -5  112.39   13.60
  27   3  -5   38.60   20.80
  25  -3  -5   87.69   18.50
  25  -3  -5  131.19   22.70
  25   3  -5  108.49   12.40
  23  -3  -5   -2.90   10.60
  23  -3  -5   -4.10   10.00
  23   3  -5    3.20    6.60
  23   3  -5   -7.20   10.30
  23   3  -5   15.90    6.00
  21  -3  -5   -6.10    7.90
  21  -3  -5    3.90   10.00
  21  -3  -5    0.40    8.80
  21   3  -5    6.90   10.00
  21   3  -5    3.60    6.60
  19  -3  -5  158.88   18.70
  19  -3  -5  140.69   17.10
  19  -3  -5  145.39   19.10
  19   3  -5  116.49   13.80
  19   3  -5  155.68   21.20
  17  -3  -5  223.88   22.10
  17  -3  -5  244.18   20.80
  17   3  -5  244.08   24.30
  15  -3  -5  640.74   47.80
  15  -3  -5  762.72   46.60
 -15  -3   5  718.63   47.70
  15   3  -5  719.43   49.30
 -15   3   5  692.23   47.80
  13  -3  -5 1122.79   74.69
 -13  -3   5 1187.18   74.69
  13  -3  -5 1310.47   74.09
 -13   3   5 1215.58   75.29
  13   3  -5 1186.78   75.69
 -13   3   5 1135.49   72.99
 -11  -3   5 1727.63  107.89
  11  -3  -5 1726.83  108.49
  11  -3  -5 1952.30  107.99
  11   3  -5 1684.33  105.29
 -11   3   5 1761.32  108.29
  11   3  -5 1794.72  109.19
 -11   3   5 1837.92  107.19
  11   3  -5 1800.12  107.39
  -9  -3   5 1126.49   68.39
   9  -3  -5 1173.88   68.69
   9  -3  -5 1051.69   69.09
   9   3  -5 1109.19   67.79
   9   3  -5 1068.79   69.59
  -9   3   5 1222.58   68.29
   9   3  -5 1048.80   66.39
  -9   3   5 1111.89   68.89
  -7  -3   5 1851.71  111.59
  -7  -3   5 1947.81  112.39
   7  -3  -5 1883.51  113.09
   7  -3  -5 1869.61  113.59
   7   3  -5 1729.43  113.39
   7   3  -5 1894.41  111.49
  -7   3   5 2085.49  113.09
  -7   3   5 1883.41  113.19
   7   3  -5 1861.21  111.89
  -5  -3   5   34.90    4.90
  -5  -3   5   35.60    5.50
   5  -3  -5   36.20    6.10
   5  -3  -5   37.20    6.50
  -5   3   5   40.80    6.00
   5   3  -5   39.70    5.00
   5   3  -5   36.00    5.20
   5   3  -5   28.30    5.80
  -5   3   5   37.10    6.70
   3  -3  -5  196.78   15.70
  -3  -3   5  198.38   14.80
   3  -3  -5  175.18   14.40
  -3  -3   5  196.18   12.60
  -3   3   5  194.28   14.30
   3   3  -5  178.48   14.50
  -3   3   5  178.88   15.00
   1  -3  -5  661.13   43.50
   1  -3  -5  674.13   43.40
   1  -3  -5  706.43   43.30
  -1  -3   5  653.63   43.50
   1   3  -5  684.93   42.90
  -1   3   5  712.63   43.80
   1   3  -5  699.83   42.10
  -1  -3  -5  742.33   46.10
  -1  -3  -5  698.93   46.00
   1  -3   5  719.03   46.70
   1   3   5  744.73   46.70
   1   3   5  754.42   46.30
  -1   3  -5  725.03   44.40
  -1   3  -5  703.63   45.70
  -3  -3  -5  671.43   43.70
  -3  -3  -5  682.13   43.80
   3  -3   5  694.03   45.00
  -3   3  -5  694.13   43.90
   3   3   5  698.33   44.00
   3   3   5  661.53   44.40
  -5  -3  -5  859.71   54.49
   5  -3   5  852.01   56.09
  -5  -3  -5  924.41   54.89
   5   3   5  823.72   54.49
  -5   3  -5  851.01   54.69
   5   3   5  851.91   55.39
  -5   3  -5  881.01   51.69
  -7  -3  -5  626.44   37.40
   7  -3   5  517.65   38.30
  -7  -3  -5  534.15   36.10
  -7   3  -5  503.25   36.50
   7   3   5  536.95   37.40
   7   3   5  505.85   36.30
  -9  -3  -5 1048.60   61.69
  -9   3  -5  994.10   59.59
   9   3   5  940.51   62.69
   9   3   5  919.11   61.39
  -9   3  -5  945.61   61.89
 -11  -3  -5 1240.68   71.89
 -11  -3  -5 1151.68   70.39
  11  -3   5 1084.49   73.09
 -11   3  -5 1101.59   71.19
 -11   3  -5 1075.29   68.79
  11   3   5 1018.40   70.29
  11   3   5 1152.48   72.09
 -13  -3  -5  718.73   47.10
  13  -3   5  730.93   51.09
  13   3   5  707.23   47.60
 -13   3  -5  688.73   45.90
  13   3   5  642.84   48.60
  15  -3   5   77.29   15.90
 -15  -3  -5  107.79   16.40
 -15  -3  -5  107.09   20.60
 -15   3  -5   74.89   12.70
  15   3   5  114.99   18.40
  15   3   5   88.29   19.50
 -17  -3  -5   27.60   10.30
  17  -3   5   49.10   16.10
  17   3   5   27.00   11.40
  17   3   5   50.99   12.00
  19  -3   5  110.39   20.50
  19   3   5   67.49   14.80
  19   3   5  130.39   21.10
  21  -3   5   83.69   26.10
  21   3   5  119.19   21.40
  21   3   5  146.79   22.30
  23  -3   5   65.19   21.10
  23   3   5   77.49   16.00
  23   3   5   70.79   15.00
  28   4  -5   51.39   15.60
  26  -4  -5  240.38   28.80
  26  -4  -5  256.97   32.00
  26   4  -5  270.57   42.50
  24  -4  -5  410.96   34.60
  24  -4  -5  355.16   33.10
  24   4  -5  276.37   33.70
  22  -4  -5  421.96   36.40
  22  -4  -5  528.95   37.80
  22   4  -5  368.66   37.00
  20  -4  -5  206.48   22.10
  20  -4  -5  166.08   22.10
  20   4  -5  167.88   23.80
  18  -4  -5  144.69   17.50
  18  -4  -5  156.28   19.00
  18   4  -5  157.98   21.40
  16  -4  -5   76.99   13.50
  16  -4  -5   37.90    9.50
 -16   4   5   63.29   13.40
  16   4  -5   56.99   11.30
  14  -4  -5   23.70    7.10
  14  -4  -5    4.80   10.70
 -14  -4   5   25.80    7.30
 -14   4   5   22.50    7.00
 -14   4   5   28.40    7.90
  14   4  -5   36.60    9.10
 -12  -4   5   43.20    7.90
  12  -4  -5   36.50    7.90
  12  -4  -5   32.20    7.10
  12   4  -5   32.40    7.90
 -12   4   5   37.90    7.40
 -12   4   5   37.10    7.00
 -10  -4   5   60.69    9.20
  10  -4  -5   69.29   10.10
  10  -4  -5   58.69   10.30
  10   4  -5   48.10    8.90
 -10   4   5   58.79    9.10
 -10   4   5   67.99    9.80
   8  -4  -5 1256.87   79.79
  -8  -4   5 1209.18   77.59
  -8  -4   5 1327.97   78.49
   8  -4  -5 1276.77   79.49
   8   4  -5 1288.77   76.59
   8   4  -5 1300.27   80.09
  -8   4   5 1267.47   79.19
  -8   4   5 1414.16   79.29
  -6  -4   5 2025.30  115.79
  -6  -4   5 1904.21  116.99
   6  -4  -5 1963.20  118.89
   6  -4  -5 1938.51  118.89
  -6  -4   5 2001.90  117.19
  -6   4   5 1964.90  118.49
   6   4  -5 1944.11  116.49
   6   4  -5 1925.61  118.79
  -6   4   5 2127.99  118.69
  -4  -4   5 1846.32  108.89
   4  -4  -5 1816.12  111.09
   4  -4  -5 1774.22  111.29
  -4  -4   5 1793.92  110.09
  -4  -4   5 1880.71  108.79
  -4   4   5 1934.01  110.89
  -4   4   5 1911.71  110.99
   4   4  -5 1821.92  110.59
   2  -4  -5 2480.55  150.08
   2  -4  -5 2463.75  149.69
  -2  -4   5 2405.36  149.39
   2  -4  -5 2537.55  149.99
  -2   4   5 2717.83  150.08
   2   4  -5 2547.95  148.69
   2   4  -5 2468.75  148.59
   0  -4  -5  676.73   45.20
   0  -4   5  688.63   45.80
   0  -4  -5  725.43   45.60
   0  -4  -5  694.53   45.40
   0   4   5  763.52   46.10
   0   4  -5  721.73   43.50
   0   4  -5  699.23   44.70
   2  -4   5  974.30   60.99
  -2  -4  -5  970.20   60.19
  -2  -4  -5  923.61   59.79
  -2   4  -5  943.11   59.49
   2   4   5  930.61   60.99
   2   4   5 1012.90   60.79
  -4  -4  -5  404.86   27.30
   4  -4   5  366.16   28.30
  -4  -4  -5  356.76   26.30
  -4   4  -5  358.76   26.30
   4   4   5  359.36   28.10
   4   4   5  366.36   26.50
   4   4   5  383.86   28.00
  -6  -4  -5  732.23   42.90
   6  -4   5  611.84   43.50
  -6  -4  -5  626.04   41.10
   6   4   5  581.44   41.00
  -6   4  -5  597.14   41.30
  -6   4  -5  633.24   38.20
   6   4   5  604.94   43.00
  -8  -4  -5  173.08   15.40
  -8  -4  -5  184.18   17.30
  -8   4  -5  117.59   14.90
   8   4   5  120.29   17.40
  -8   4  -5  149.79   12.00
   8   4   5  130.39   15.20
 -10  -4  -5  210.18   18.00
  10  -4   5  189.68   21.80
 -10   4  -5  186.88   15.60
 -10   4  -5  207.48   20.10
  10   4   5  152.58   20.40
  10   4   5  164.18   17.80
 -12  -4  -5  178.28   20.90
  12  -4   5  218.98   24.40
 -12  -4  -5  196.58   19.50
 -12   4  -5  201.78   17.80
  12   4   5  197.78   20.00
  14  -4   5  167.18   24.50
 -14  -4  -5  124.09   17.70
  14   4   5  143.19   22.10
  14   4   5  163.98   19.00
 -14   4  -5  152.48   17.10
  16  -4   5  296.17   31.50
 -16   4  -5  220.78   22.50
  16   4   5  217.68   26.30
  16   4   5  250.47   24.20
 -18  -4  -5  160.58   21.40
  18  -4   5  229.08   31.90
  18   4   5  261.87   24.70
  18   4   5  198.98   26.30
  20  -4   5  531.45   62.29
  20   4   5  481.75   41.70
  20   4   5  506.65   39.20
  22  -4   5  429.16   43.40
  22   4   5  354.46   36.50
  22   4   5  407.16   34.20
  27  -5  -5  360.26   36.50
  27  -5  -5  443.56   41.60
  27   5  -5  385.36   39.40
  25  -5  -5  617.44   55.09
  25   5  -5  692.63   55.79
  23  -5  -5 1470.25   88.89
  23  -5  -5 1149.69   86.69
  23   5  -5 1372.96   89.39
  21  -5  -5 1096.19   67.89
  21  -5  -5  918.41   67.29
  21   5  -5  964.40   68.69
  19  -5  -5  289.17   26.30
  19  -5  -5  232.58   26.20
  19   5  -5  272.07   28.30
  17  -5  -5   -2.40    7.60
  17   5  -5   -0.80    8.40
 -15  -5   5  187.18   20.00
  15  -5  -5  196.88   19.70
  15  -5  -5  175.48   18.90
 -15   5   5  202.08   19.60
  15   5  -5  220.68   22.30
 -13  -5   5 1043.70   63.19
  13  -5  -5  913.71   62.09
 -13   5   5 1011.20   62.39
 -13   5   5  932.91   61.99
  13   5  -5  940.41   63.39
  11  -5  -5  284.37   22.20
 -11  -5   5  296.87   21.90
  11  -5  -5  293.07   22.90
  11   5  -5  251.57   23.30
 -11   5   5  276.77   21.80
 -11   5   5  240.08   21.90
  -9  -5   5  908.21   57.49
   9  -5  -5  924.21   58.69
   9  -5  -5  842.62   58.59
   9   5  -5  971.10   59.49
  -9   5   5  898.01   57.99
  -9   5   5  955.60   58.19
  -7  -5   5  885.71   59.39
  -7  -5   5  908.71   58.69
   7  -5  -5  959.90   62.19
   7  -5  -5  966.90   62.09
  -7  -5   5 1066.59   60.69
   7   5  -5 1010.90   62.39
   7   5  -5  931.91   58.69
  -7   5   5 1102.19   62.09
  -7   5   5 1031.70   61.69
  -5  -5   5 1940.71  118.29
   5  -5  -5 1930.41  118.89
  -5  -5   5 1832.42  117.19
   5  -5  -5 1856.41  118.99
  -5   5   5 2146.89  118.99
   5   5  -5 2004.50  118.49
  -5   5   5 2077.89  118.59
  -3  -5   5 4805.32  275.97
   3  -5  -5 4660.53  278.27
   3  -5  -5 4640.84  278.57
   3  -5  -5 4572.04  278.07
  -3  -5   5 4582.34  277.37
  -3  -5   5 4820.52  275.37
   3   5  -5 4653.03  276.27
  -3   5   5 4872.71  278.07
   3   5  -5 4912.01  277.27
   1  -5  -5 1953.50  118.49
   1  -5  -5 1879.21  118.79
   1  -5  -5 1966.80  118.49
  -1  -5   5 1988.50  116.69
  -1  -5   5 2014.20  118.59
   1   5  -5 1917.41  116.89
  -1   5   5 2047.80  118.49
   1   5  -5 1931.81  116.69
  -1  -5  -5 5085.99  305.77
  -1  -5  -5 4954.00  305.77
  -1  -5  -5 5205.08  306.07
   1  -5   5 5109.29  306.47
  -1   5  -5 5262.47  303.57
  -1   5  -5 5156.48  304.87
   1   5   5 5642.54  306.47
  -3  -5  -5 1592.14   97.59
  -3  -5  -5 1540.95   96.69
   3  -5   5 1616.94   98.69
   3   5   5 1597.44   98.99
  -3   5  -5 1567.14   94.29
  -3   5  -5 1548.65   96.39
   3   5   5 1687.73   97.99
   5  -5   5  110.69   15.50
  -5  -5  -5  113.99   12.80
  -5  -5  -5  128.59   14.30
   5   5   5  114.49   15.10
  -5   5  -5  115.59   13.40
   5   5   5   87.59   15.10
  -7  -5  -5   35.60   10.70
   7  -5   5   60.19   13.20
  -7  -5  -5   55.19   10.20
  -7   5  -5   52.89    9.70
   7   5   5   50.49   10.70
  -7   5  -5   35.90    6.00
   7   5   5   50.49   10.40
   7   5   5   51.59    8.30
   9  -5   5   65.49   13.60
  -9  -5  -5   73.79   12.30
  -9   5  -5   56.19    8.20
   9   5   5   66.79   12.30
  11  -5   5  138.39   22.10
 -11  -5  -5  121.59   15.00
  11   5   5  116.19   15.60
 -11   5  -5  100.99   12.50
  11   5   5   98.89   19.50
 -13  -5  -5  176.98   18.60
  13  -5   5  175.28   25.60
  13   5   5  141.59   22.50
 -13   5  -5  166.28   16.80
  13   5   5  159.88   19.00
 -15  -5  -5  119.29   17.30
  15  -5   5  186.18   27.50
  15   5   5  119.49   21.80
 -15   5  -5  103.59   19.90
  15   5   5  154.48   18.60
  17  -5   5  639.74   51.09
 -17  -5  -5  578.34   49.70
  17   5   5  600.04   46.40
  17   5   5  616.04   42.30
 -17   5  -5  519.75   41.40
 -19  -5  -5  641.74   47.20
  19   5   5  766.82   54.49
  21  -5   5  842.72   62.19
 -21  -5  -5  583.84   49.70
  21   5   5  689.63   54.69
  21   5   5  786.72   50.49
  26  -6  -5  176.68   27.60
  26  -6  -5  243.38   31.60
  26   6  -5  262.57   32.60
  24  -6  -5  248.68   33.90
  24  -6  -5  270.87   36.50
  24   6  -5  366.26   34.80
  22  -6  -5  818.32   58.29
  22  -6  -5  713.63   57.59
  22   6  -5  885.11   60.59
  20  -6  -5  150.28   22.30
  20  -6  -5  168.78   22.30
  20   6  -5  143.99   24.10
  18  -6  -5   65.29   14.20
  18  -6  -5  101.19   17.40
  18   6  -5   68.39   13.70
  16  -6  -5   -1.90    7.90
  16   6  -5    3.40    8.80
  14  -6  -5  104.79   15.00
 -14  -6   5   66.89   11.90
 -14   6   5   77.69   13.90
  14   6  -5   88.39   16.80
 -14   6   5  117.19   14.80
 -12  -6   5  162.88   21.60
  12  -6  -5  178.28   18.50
  12  -6  -5  198.18   18.80
  12   6  -5  163.98   19.80
 -12   6   5  179.48   16.90
 -12   6   5  175.58   18.20
 -10  -6   5  169.28   16.30
  10  -6  -5  181.58   17.20
  10   6  -5  192.08   29.10
 -10   6   5  187.58   18.10
 -10   6   5  119.59   21.60
   8  -6  -5  333.97   26.10
  -8  -6   5  345.87   22.80
  -8  -6   5  353.26   24.80
   8  -6  -5  321.37   31.40
  -8   6   5  335.97   24.90
   8   6  -5  319.07   26.50
  -8   6   5  364.16   25.90
  -6  -6   5  660.03   41.10
  -6  -6   5  599.64   43.70
   6  -6  -5  650.33   43.30
  -6  -6   5  687.93   41.20
   6  -6  -5  627.24   42.80
   6  -6  -5  591.24   43.20
  -6  -6   5  644.34   40.10
  -6   6   5  662.53   42.90
   6   6  -5  660.13   43.00
  -6   6   5  652.03   42.40
   4  -6  -5 2739.73  167.48
   4  -6  -5 2738.93  166.88
   4  -6  -5 2731.53  166.88
  -4  -6   5 2985.70  164.48
  -4  -6   5 2699.83  167.38
  -4  -6   5 2732.23  165.78
   4   6  -5 2686.23  165.98
  -4   6   5 2947.01  166.98
   4   6  -5 2863.51  164.38
   2  -6  -5 2703.53  161.98
  -2  -6   5 2898.11  159.88
  -2  -6   5 2710.83  161.58
   2  -6  -5 2687.53  162.48
   2  -6  -5 2601.74  161.78
  -2  -6   5 2523.15  161.58
  -2   6   5 2871.31  161.98
   2   6  -5 2725.93  159.88
   2   6  -5 2624.54  160.38
   0  -6  -5 1214.08   76.89
   0  -6   5 1179.88   76.49
   0  -6  -5 1091.69   75.49
   0  -6  -5 1168.88   75.99
   0  -6   5 1324.87   74.49
   0  -6   5 1182.48   75.19
   0  -6  -5 1219.08   76.09
   0   6   5 1302.47   76.39
   0   6  -5 1196.08   74.39
   0   6  -5 1308.37   74.39
   2  -6   5 1676.63  104.59
   2  -6   5 1923.61  105.49
   2  -6   5 1739.53  107.59
  -2  -6  -5 1665.63  105.89
   2   6   5 1536.05  107.59
   2   6   5 1832.02  106.79
  -2   6  -5 1731.33  105.09
  -2   6  -5 1824.42  103.99
  -4  -6  -5 1269.97   74.59
   4  -6   5 1151.68   74.69
   4  -6   5 1088.49   69.69
  -4  -6  -5 1166.28   71.99
  -4   6  -5 1005.80   76.99
   4   6   5 1153.78   76.19
   4   6   5 1223.98   73.29
   6  -6   5  221.28   19.30
  -6  -6  -5  228.38   21.70
  -6  -6  -5  228.78   19.20
   6  -6   5  227.18   23.60
  -6   6  -5  232.58   19.30
   6   6   5  230.68   21.50
   6   6   5  184.68   25.00
   8  -6   5   99.19   16.40
  -8  -6  -5  118.69   14.00
   8   6   5  139.69   22.00
   8   6   5  101.89   18.40
  10  -6   5  276.77   31.40
 -10  -6  -5  335.67   24.70
 -10   6  -5  301.77   21.90
  10   6   5  287.87   27.50
 -12  -6  -5  243.98   21.00
  12  -6   5  199.38   29.50
  12   6   5  212.28   21.10
  12   6   5  188.18   26.10
 -12   6  -5  240.98   19.30
  12   6   5  229.88   26.00
 -14  -6  -5   68.79   10.70
  14  -6   5   68.49   18.40
  14   6   5   54.69   10.40
  14   6   5   52.19   14.90
 -14   6  -5   72.49   12.80
  14   6   5   44.70   13.90
  16  -6   5  242.58   31.40
 -16   6  -5  204.38   20.70
  16   6   5  185.28   27.50
  16   6   5  185.78   21.10
 -18  -6  -5   69.69   12.40
  18  -6   5   79.79   25.50
  18   6   5  128.49   24.30
 -20  -6  -5  498.25   37.60
  20   6   5  376.96   39.60
  25  -7  -5   43.70   15.90
  25  -7  -5   30.90   13.90
  25   7  -5   25.00   15.40
  23  -7  -5   68.29   16.00
  23  -7  -5   57.59   16.00
  23   7  -5   80.29   17.50
  21  -7  -5  152.88   22.60
  21   7  -5  131.69   25.20
  19  -7  -5   68.99   14.30
  19   7  -5   70.49   14.80
  17  -7  -5  128.79   18.50
  17  -7  -5  127.49   21.30
  17   7  -5  109.19   22.00
  15  -7  -5   11.70   10.10
  15   7  -5   22.20   10.10
 -15   7   5   13.50    9.60
  13  -7  -5  311.57   25.20
 -13  -7   5  273.57   24.40
  13   7  -5  220.98   25.00
 -13   7   5  279.37   24.50
  11  -7  -5  157.58   16.80
  11   7  -5  109.29   18.20
 -11   7   5  140.69   16.30
 -11   7   5  139.09   14.80
   9  -7  -5  660.43   44.40
  -9  -7   5  668.13   41.70
  -9  -7   5  576.14   46.10
   9  -7  -5  611.54   44.80
  -9  -7   5  707.43   44.00
  -9   7   5  705.53   43.90
  -9   7   5  689.03   44.60
   9   7  -5  602.54   44.90
  -7  -7   5  247.68   19.30
   7  -7  -5  265.27   21.70
   7  -7  -5  244.28   22.10
   7  -7  -5  285.17   22.20
  -7  -7   5  230.78   26.00
  -7  -7   5  282.87   20.50
  -7   7   5  251.27   20.70
  -7   7   5  246.58   21.70
   7   7  -5  256.67   22.50
  -5  -7   5  186.88   16.60
  -5  -7   5  155.08   14.80
   5  -7  -5  214.58   18.40
   5  -7  -5  202.18   17.70
   5  -7  -5  185.18   18.50
  -5  -7   5  189.98   19.20
   5   7  -5  187.08   17.90
  -3  -7   5   62.69    8.20
   3  -7  -5   37.40    7.40
   3  -7  -5   35.60    8.40
  -3  -7   5   47.90    8.80
   3  -7  -5   45.30   10.10
  -3  -7   5   51.49    8.80
  -3   7   5   41.70   10.20
   3   7  -5   52.89    8.50
   3   7  -5   36.60    7.00
  -1  -7   5   58.89   10.30
  -1  -7   5   41.40    8.70
   1  -7  -5   38.70    8.50
  -1  -7   5   55.79    8.00
   1  -7  -5   26.80    8.30
   1  -7  -5   37.90    9.40
  -1   7   5   45.50    9.70
   1   7  -5   56.29    8.20
   1   7  -5   51.79    9.80
  -1  -7  -5   73.69   13.10
   1  -7   5  125.69   11.90
  -1  -7  -5   99.79   15.00
  -1  -7  -5  122.89   14.60
   1  -7   5   83.39   13.10
   1  -7   5   81.29   15.10
   1   7   5  116.39   15.20
  -1   7  -5  121.09   12.40
  -1   7  -5   99.79   11.20
   3  -7   5   29.60   10.70
   3  -7   5   15.00    6.40
   3  -7   5   30.90    6.40
  -3  -7  -5   11.90    6.90
  -3  -7  -5   29.20    7.70
   3   7   5   15.60    8.80
   3   7   5   28.60   12.20
  -3   7  -5   26.50    6.00
  -3   7  -5   31.10    6.60
   5  -7   5  568.64   39.10
   5  -7   5  592.14   44.00
  -5  -7  -5  591.94   39.50
  -5   7  -5  530.25   38.80
   5   7   5  585.44   43.90
  -7  -7  -5  211.98   19.60
   7  -7   5  207.48   26.10
   7   7   5  177.08   24.50
   7   7   5  227.48   22.30
   9  -7   5  201.08   27.70
  -9  -7  -5  219.88   20.10
   9   7   5  198.48   25.70
   9   7   5  220.78   23.80
  11  -7   5  745.93   55.29
 -11  -7  -5  650.13   46.10
  11   7   5  777.02   53.19
  11   7   5  732.53   50.09
 -11   7  -5  602.94   43.50
  13  -7   5   48.20   16.00
 -13  -7  -5   25.10    9.30
 -13   7  -5   34.50    7.90
  13   7   5   40.20   13.40
  13   7   5   27.80   13.10
  15  -7   5  283.67   33.10
 -15  -7  -5  168.18   20.70
  15   7   5  217.78   26.50
  15   7   5  263.87   29.80
 -15   7  -5  230.18   20.50
 -17  -7  -5   53.69   11.00
  17  -7   5   89.39   21.20
  17   7   5   52.69   15.90
 -19  -7  -5   39.10    8.40
  19  -7   5   35.20   17.50
  19   7   5   29.20   17.80
  19   7   5   55.39   16.20
  24  -8  -5   77.39   16.60
  24  -8  -5   43.10   15.10
  24   8  -5   62.19   16.90
  22  -8  -5   22.60   13.20
  22  -8  -5   31.30   14.20
  22   8  -5   11.70   13.00
  20  -8  -5   20.30   17.20
  20  -8  -5   20.30   11.60
  20   8  -5    9.90   15.20
  18  -8  -5   43.50   11.10
  18  -8  -5   58.79   13.80
  18   8  -5   43.00   13.40
  16  -8  -5  742.63   53.99
  16   8  -5  757.52   54.69
  14  -8  -5 1327.47   79.79
  14   8  -5 1198.68   79.39
 -14   8   5 1095.19   78.09
 -12  -8   5 1528.95   89.39
  12  -8  -5 1455.05   89.99
  12  -8  -5 1244.28   90.39
 -12   8   5 1433.96   89.19
  12   8  -5 1341.17   89.49
  10  -8  -5  327.97   28.80
  10  -8  -5  351.56   29.30
 -10  -8   5  404.36   26.40
 -10  -8   5  412.76   32.90
 -10   8   5  346.27   29.00
  10   8  -5  345.07   30.40
  -8  -8   5  198.58   16.40
  -8  -8   5  218.38   17.00
  -8  -8   5  180.48   18.00
   8  -8  -5  191.38   19.70
   8  -8  -5  177.68   18.80
  -8   8   5  189.28   18.90
   8   8  -5  174.08   20.20
  -8   8   5  220.88   18.10
  -6  -8   5   97.39   13.60
  -6  -8   5  109.09   12.30
  -6  -8   5  124.29   17.70
   6  -8  -5  133.49   15.00
   6  -8  -5  137.19   15.20
  -6   8   5  122.59   14.90
   6   8  -5  123.99   18.40
   4  -8  -5  446.56   32.40
  -4  -8   5  444.46   44.40
   4  -8  -5  484.45   35.30
  -4  -8   5  423.16   32.00
  -4  -8   5  404.66   29.70
   4  -8  -5  468.25   32.90
  -4   8   5  411.56   32.10
   4   8  -5  458.35   32.30
  -2  -8   5  298.77   22.20
  -2  -8   5  270.57   25.40
   2  -8  -5  276.87   26.00
  -2  -8   5  290.67   25.00
   2  -8  -5  295.07   24.50
   2  -8  -5  304.37   25.00
  -2  -8   5  331.67   20.50
  -2   8   5  290.77   24.30
   2   8  -5  295.57   23.70
   0  -8   5  610.14   45.10
   0  -8   5  601.64   42.90
   0  -8  -5  667.53   44.20
   0  -8   5  645.34   44.00
   0  -8  -5  638.34   45.10
   0   8  -5  611.34   41.90
   0   8   5  658.93   43.90
  -2  -8  -5   14.90    6.40
   2  -8   5    7.90    6.10
   2  -8   5    7.60    6.20
  -2  -8  -5    6.80    6.20
  -2   8  -5   11.10    5.50
   2   8   5    2.70    7.40
   4  -8   5   98.09   14.40
   4  -8   5  106.89   20.10
  -4  -8  -5  128.69   16.40
   4   8   5  111.19   16.90
   6  -8   5  468.95   32.30
   6  -8   5  463.45   39.50
  -6  -8  -5  480.25   34.20
   6   8   5  414.86   39.00
   6   8   5  464.55   35.60
   8  -8   5  874.01   64.89
  -8  -8  -5  951.80   58.49
   8   8   5  887.71   60.69
   8   8   5  868.11   63.99
  10  -8   5  962.60   65.59
 -10  -8  -5 1068.59   68.59
  10  -8   5 1203.18   77.09
 -10   8  -5  948.61   65.19
  10   8   5 1206.08   75.89
  10   8   5 1152.78   72.09
 -12  -8  -5  710.03   50.19
  12  -8   5  790.92   59.99
  12   8   5  759.22   54.19
  12   8   5  835.22   57.89
 -12   8  -5  728.73   47.90
 -14  -8  -5   70.09   12.40
  14  -8   5  106.59   21.50
  14   8   5  129.99   24.50
  14   8   5  136.89   22.60
 -14   8  -5  100.49   14.40
  16  -8   5  -17.00   14.20
  16   8   5   -7.40   12.50
  18  -8   5    7.70   18.50
 -18   8  -5    7.30   11.60
  18   8   5   46.30   15.30
  18   8   5   24.90   15.80
  23  -9  -5  164.38   28.60
  23  -9  -5  151.08   25.80
  23   9  -5  178.58   28.30
  21  -9  -5  148.59   24.30
  21   9  -5  161.78   26.70
  19  -9  -5  -19.10    9.80
  19  -9  -5   -2.60   10.40
  19   9  -5    7.00   12.30
  17  -9  -5   64.99   13.10
  17  -9  -5   86.59   15.80
  17   9  -5  122.59   21.90
  15  -9  -5  435.96   36.70
  15   9  -5  453.95   38.20
 -15   9   5  447.16   36.70
  13  -9  -5  354.36   32.20
  13   9  -5  384.36   34.40
 -13   9   5  394.16   32.40
  11  -9  -5  418.36   33.60
 -11  -9   5  373.36   31.90
 -11  -9   5  340.27   29.30
 -11   9   5  407.66   32.90
  11   9  -5  452.65   35.00
  -9  -9   5  611.14   43.90
   9  -9  -5  568.34   43.90
  -9  -9   5  668.33   41.40
  -9   9   5  571.84   43.40
   9   9  -5  597.94   44.40
  -7  -9   5   31.90    8.20
  -7  -9   5   20.20    7.20
   7  -9  -5   20.00    8.30
   7   9  -5    9.00    7.80
  -7   9   5   22.30    8.40
  -5  -9   5   -0.30    7.40
  -5  -9   5    7.20    6.40
  -5  -9   5   19.20    9.40
   5  -9  -5    5.40    8.20
  -5   9   5    8.30    7.50
   5   9  -5   13.50    7.30
   3  -9  -5  231.98   21.60
  -3  -9   5  223.98   23.40
  -3  -9   5  250.47   24.70
  -3  -9   5  170.18   21.30
   3   9  -5  201.88   28.20
  -3   9   5  254.57   21.90
  -1  -9   5  776.12   50.39
  -1  -9   5  732.93   53.79
   1  -9  -5  795.82   53.09
  -1  -9   5  709.13   48.00
  -1  -9   5  841.82   57.29
   1   9  -5  786.92   51.49
  -1   9   5  805.82   52.69
   1  -9   5  468.05   40.50
   1  -9   5  539.45   39.00
   1  -9   5  591.34   39.10
  -1  -9  -5  464.05   40.40
  -1  -9  -5  537.55   38.90
   1   9   5  483.05   38.10
  -1   9  -5  562.94   37.30
   3  -9   5  156.28   18.40
  -3  -9  -5  152.38   18.60
  -3  -9  -5  167.68   18.70
   3  -9   5  159.18   22.90
   3   9   5  145.69   18.70
   3   9   5  134.09   23.10
   5  -9   5   -4.30    7.20
  -5  -9  -5   -7.30    7.90
   5  -9   5    4.10   11.00
   5   9   5   -5.00    8.60
   5   9   5  -14.10   10.40
  -7  -9  -5  243.48   22.80
   7  -9   5  233.98   20.50
   7  -9   5  254.27   28.80
   7   9   5  209.18   24.50
   7   9   5  187.28   27.90
  -9  -9  -5  703.93   43.40
   9  -9   5  601.14   49.99
   9   9   5  551.34   48.50
   9   9   5  573.44   45.10
 -11  -9  -5  567.74   40.10
  11  -9   5  552.34   48.80
  11   9   5  524.75   47.10
  11   9   5  535.85   43.40
 -11   9  -5  641.14   37.30
  13  -9   5   67.49   23.90
 -13  -9  -5   49.99   10.70
 -13   9  -5   61.29    9.80
  13   9   5   61.49   16.20
  13   9   5   76.39   15.50
  15  -9   5   28.20   17.90
 -15   9  -5   13.90    9.30
  15   9   5   26.00   13.90
  15   9   5   10.60   16.60
  17  -9   5   27.10   20.30
 -17   9  -5   20.60   11.60
  17   9   5   23.60   15.40
  17   9   5   42.60   14.80
  20 -10  -5   19.00   14.40
  20 -10  -5   32.30   13.20
  20  10  -5   25.70   14.40
  18 -10  -5   20.10   11.10
  18 -10  -5   -8.10   11.20
  18  10  -5    0.10   10.70
  16 -10  -5   10.50   14.10
  16 -10  -5   -9.80    9.80
  16  10  -5   -0.90   14.00
  14 -10  -5   18.10    8.60
  14 -10  -5    3.30    9.70
 -14  10   5    4.10    9.40
  14  10  -5   -3.30    9.20
  12 -10  -5   25.30   10.30
 -12  10   5   21.90   10.50
  12  10  -5   33.80   11.30
 -10 -10   5   35.30   14.00
 -10 -10   5   41.60   11.30
  10 -10  -5   54.49   12.50
  10  10  -5   63.59   13.10
 -10  10   5   43.10   12.00
  -8 -10   5   -1.90    9.00
   8 -10  -5   18.40    9.90
  -8  10   5   -0.10    9.60
   8  10  -5   22.60    9.80
  -6 -10   5  196.28   25.80
  -6 -10   5  214.18   21.50
   6 -10  -5  223.78   23.10
   6  10  -5  233.88   24.50
  -6  10   5  213.08   23.20
  -4 -10   5  243.08   25.90
   4 -10  -5  265.17   26.30
  -4 -10   5  324.67   25.00
   4  10  -5  320.57   27.30
  -4  10   5  295.27   27.00
  -2 -10   5  254.17   19.00
   2 -10  -5  195.78   22.90
  -2 -10   5  189.28   24.20
  -2 -10   5  217.88   25.20
  -2  10   5  213.88   22.70
   2  10  -5  265.77   23.60
   0 -10   5   72.69   13.50
   0 -10   5   82.69   16.30
   0 -10  -5   62.79   12.90
   0  10  -5   88.39   18.00
   0  10   5  100.59   17.00
   2 -10   5   49.10   19.20
   2 -10   5   56.09   15.00
  -2 -10  -5   54.69   12.70
  -2 -10  -5   60.39   12.00
   2  10   5   51.59   11.90
  -2  10  -5   53.69   10.70
   4 -10   5    0.10   12.00
   4 -10   5  -13.10    7.70
  -4 -10  -5   -5.50    9.90
  -4 -10  -5   -4.10    7.80
   4  10   5  -17.60    9.70
   4  10   5   -1.10    9.30
   6 -10   5   -9.00   11.10
  -6 -10  -5   -7.00    8.70
   6 -10   5   -1.70    7.40
   6  10   5   -8.40    9.30
  -8 -10  -5   15.80    9.10
   8 -10   5   10.00   12.90
   8 -10   5   17.60    7.20
   8  10   5    3.50   10.20
   8  10   5   -1.60   11.50
  10 -10   5   67.79   18.10
  10  10   5   95.59   15.50
  10  10   5   47.90   15.00
 -12 -10  -5  160.28   18.10
  12  10   5  141.49   23.60
  14 -10   5   -4.80   17.00
  14  10   5   -0.80   12.70
 -14  10  -5  -11.70    7.60
  14  10   5    5.40   12.00
  16 -10   5  -13.40   17.60
  16  10   5   -6.60   13.00
  16  10   5  -10.70   13.70
  19 -11  -5  -22.60   15.80
  19 -11  -5    7.30   12.90
  19  11  -5    1.50   13.60
  17 -11  -5  191.38   23.70
  17  11  -5  160.38   26.50
  15 -11  -5  177.68   25.80
  15 -11  -5  232.78   24.80
  15  11  -5  197.88   27.50
  13 -11  -5  532.75   40.90
  13 -11  -5  508.45   38.50
 -13  11   5  402.66   44.30
  13  11  -5  505.65   41.60
  11 -11  -5  522.85   40.10
 -11 -11   5  469.05   37.00
  11  11  -5  481.35   39.90
 -11  11   5  474.15   39.60
   9 -11  -5  147.49   20.10
  -9 -11   5  124.59   18.70
  -9  11   5  134.79   21.20
   9  11  -5  168.28   22.10
  -7 -11   5  100.29   15.80
   7 -11  -5  110.09   17.30
  -7 -11   5   74.89   13.40
   7  11  -5  105.89   19.10
  -5 -11   5   40.70   12.60
   5 -11  -5   52.39   11.90
  -5 -11   5   48.80   11.30
  -5  11   5   18.50   10.90
   5  11  -5   31.70   10.80
   3 -11  -5   70.99   13.60
  -3 -11   5   33.20    8.00
  -3 -11   5   48.90   20.50
  -3  11   5   45.80   11.90
   3  11  -5   39.10   11.30
  -1 -11   5   90.49   16.40
  -1 -11   5   61.99    9.80
   1 -11  -5   77.59   14.30
  -1  11   5   75.39   13.60
   1  11  -5   76.49   13.50
   1 -11   5   12.70   12.10
   1 -11   5   13.70    5.60
  -1 -11  -5   10.70    9.80
   1 -11   5   -4.20    9.70
  -1  11  -5   11.90    9.10
   1  11   5    7.90    9.60
  -3 -11  -5   30.90   11.50
   3 -11   5   19.40    6.00
   3 -11   5   12.90   10.50
   3 -11   5   17.40   13.30
  -3 -11  -5   44.00   11.60
   3  11   5   18.50   10.50
   5 -11   5   63.19   17.90
  -5 -11  -5   46.80   12.80
  -5 -11  -5   48.00   12.70
   5  11   5   50.59   15.40
   5  11   5   40.50   12.20
   7 -11   5  414.06   40.40
   7 -11   5  406.06   32.40
  -7 -11  -5  415.56   33.20
   7  11   5  358.26   33.60
   7  11   5  372.96   39.20
   9 -11   5  193.48   34.40
   9 -11   5  238.78   23.40
  -9 -11  -5  310.57   25.40
   9  11   5  265.47   27.90
 -11 -11  -5  218.28   22.30
  11 -11   5  196.08   33.40
  11  11   5  221.28   27.40
  11  11   5  250.67   32.50
  13 -11   5   20.10   17.80
  13  11   5   61.29   16.60
  13  11   5   92.99   16.90
  16 -12  -5  434.76   39.90
  16 -12  -5  438.76   38.60
  16  12  -5  442.46   41.90
  14 -12  -5  580.84   48.10
  14 -12  -5  626.64   46.70
  14  12  -5  614.24   49.10
 -14  12   5  571.94   47.70
  12 -12  -5  955.90   65.19
  12 -12  -5  862.51   67.09
  12  12  -5  921.51   68.29
 -12  12   5  882.21   64.19
  10 -12  -5  517.75   41.60
 -10 -12   5  476.15   39.50
  10  12  -5  592.24   43.50
 -10  12   5  484.05   43.10
  -8 -12   5   67.49   12.20
   8 -12  -5   80.89   15.00
  -8  12   5   87.39   17.20
   8  12  -5   99.89   20.20
   6 -12  -5   11.00    8.90
  -6 -12   5    2.20    8.60
   6  12  -5    5.10    8.90
  -6  12   5    6.30   10.20
   4 -12  -5   51.89   12.20
  -4 -12   5   66.49   15.40
  -4 -12   5   49.50    9.20
  -4  12   5   60.49   13.60
   4  12  -5   57.89   12.50
   2 -12  -5   86.09   15.60
  -2 -12   5   96.39   16.50
  -2 -12   5  111.09   12.80
   2  12  -5   99.59   18.30
  -2  12   5   71.69   14.70
   0 -12  -5  132.39   20.70
   0 -12   5  137.19   22.70
   0 -12   5  134.79   14.20
   0  12   5  130.69   20.50
   0  12  -5  119.09   19.60
  -2 -12  -5  120.99   20.90
   2 -12   5  124.69   13.70
   2 -12   5  108.69   18.70
  -2  12  -5  107.49   18.70
   2  12   5  125.19   20.00
  -4 -12  -5   67.29   13.70
   4 -12   5   32.90   18.20
  -4 -12  -5   51.79   13.80
   4 -12   5   73.49   17.30
   4  12   5   72.99   14.60
   6 -12   5  195.28   32.20
  -6 -12  -5  264.67   33.80
  -6 -12  -5  237.58   26.00
   6  12   5  180.88   30.20
   6  12   5  238.88   26.70
   8 -12   5  857.41   72.89
  -8 -12  -5  691.73   53.89
   8  12   5  663.23   56.49
   8  12   5  588.54   49.40
  10 -12   5  397.36   33.70
  10 -12   5  412.46   45.60
  10  12   5  443.76   38.40
  10  12   5  495.45   45.00
  12 -12   5  266.97   40.60
  12  12   5  272.07   35.50
  12  12   5  286.07   31.50
  13 -13  -5  377.36   36.90
  13 -13  -5  385.66   35.60
  13  13  -5  398.46   37.90
 -13  13   5  368.56   35.90
  11 -13  -5  307.17   30.90
  11 -13  -5  313.57   33.10
 -11  13   5  346.17   32.70
  11  13  -5  323.07   34.10
   9 -13  -5  208.38   26.20
   9  13  -5  208.68   29.20
  -9  13   5  210.38   25.60
  -7 -13   5  173.08   22.50
   7 -13  -5  187.28   24.50
  -7 -13   5  221.48   20.60
   7  13  -5  224.68   26.80
  -7  13   5  204.28   25.30
  -5 -13   5   -0.10   10.60
   5 -13  -5    7.60   10.40
  -5 -13   5   -1.10    6.40
   5  13  -5   -6.00    9.10
  -5  13   5   12.10   11.30
  -3 -13   5  -15.50    9.60
  -3 -13   5   -8.80   12.00
  -3  13   5   -1.30   12.50
   3  13  -5   -5.80    8.00
  -1 -13   5    6.90   10.90
   1 -13  -5  -16.30   10.00
  -1 -13   5    3.00    5.80
  -1  13   5   -7.20   13.90
   1  13  -5   -2.10    9.10
   1 -13   5   15.30   14.30
  -1 -13  -5   -2.30   10.50
   1 -13   5   14.80    6.60
   1  13   5    8.20   13.20
  -1  13  -5    7.70    8.90
  -3 -13  -5  112.19   22.30
   3 -13   5   99.89   13.30
   3 -13   5  120.79   22.30
   3  13   5   85.19   18.10
   5 -13   5   50.99   17.60
  -5 -13  -5   56.99   15.60
   5  13   5   52.49   17.50
  -7 -13  -5  177.68   26.30
  -7 -13  -5  224.28   26.10
   7  13   5  233.98   37.20
   9 -13   5   86.69   21.10
   9  13   5   88.59   20.00
   9  13   5   83.39   19.60
  10 -14  -5  -22.00   17.60
  10  14  -5   21.70   12.90
  -8 -14   5   71.79   13.20
  -8 -14   5   40.60   11.10
   8 -14  -5   50.79   13.60
  -8  14   5   58.69   15.90
   8  14  -5   52.79   14.80
  -6 -14   5   43.70   11.20
  -6 -14   5   64.89   14.00
   6 -14  -5   78.19   23.50
   6 -14  -5   46.90   23.70
   6  14  -5  112.79   22.00
  -6  14   5   77.19   16.50
  -4 -14   5   81.79   16.10
  -4 -14   5   80.19   14.40
   4  14  -5   78.99   20.90
  -4  14   5   77.49   16.60
  -2 -14   5   36.40    8.90
  -2 -14   5   47.00   14.10
   2 -14  -5   38.60   15.90
  -2  14   5   49.50   13.70
   2  14  -5   21.20   11.90
   0 -14  -5  129.59   22.70
   0 -14   5  108.69   15.20
   0 -14   5  135.59   24.70
   0  14   5  130.89   21.80
   0  14  -5  114.69   22.30
   2 -14   5  107.09   14.40
   2 -14   5   70.39   17.80
  -2 -14  -5   79.39   17.50
   2  14   5  125.89   22.10
  -4 -14  -5   36.50   15.20
   4 -14   5   15.00   22.10
   4  14   5   49.60   15.00
  28   0  -6  388.76   37.90
  28   0  -6  393.36   35.20
  28   0  -6  334.27   30.60
  26   0  -6  407.46   36.40
  26   0  -6  446.96   37.50
  26   0  -6  456.35   37.40
  26   0  -6  411.46   38.60
  24   0  -6  161.48   21.60
  24   0  -6  181.98   18.90
  24   0  -6  177.88   22.20
  24   0  -6  179.88   24.40
  22   0  -6   11.80    9.00
  22   0  -6   -8.00    8.20
  22   0  -6   -3.80    6.60
  20   0  -6   72.19   11.90
  20   0  -6   94.79   16.00
  20   0  -6   96.49   12.40
  18   0  -6  539.65   42.20
  18   0  -6  672.13   39.80
  16   0  -6   35.80    7.90
 -16   0   6   30.40    7.80
  14   0  -6    4.50    5.30
 -14   0   6    4.10    5.70
  14   0  -6    3.00    5.80
  12   0  -6    1.60    4.00
  12   0  -6   12.30    5.60
 -12   0   6    5.30    4.70
 -12   0   6    3.00    3.30
  10   0  -6 1847.02  110.89
  10   0  -6 1884.21  112.79
 -10   0   6 1858.31  113.09
 -10   0   6 1925.51  110.59
   8   0  -6 5311.67  322.07
  -8   0   6 5598.54  322.47
  -8   0   6 5702.93  320.57
   8   0  -6 5406.26  322.27
   6   0  -6 7535.15  457.75
  -6   0   6 7973.90  458.05
   6   0  -6 7729.33  458.45
  -6   0   6 8199.38  457.25
  -4   0   6 7034.60  425.86
   4   0  -6 7147.58  425.86
  -4   0   6 7870.51  428.66
   4   0  -6 7142.29  424.86
  -2   0   6 2607.24  146.99
   2   0  -6 2383.96  146.79
   2   0  -6 2501.85  148.39
  -2   0   6 2504.95  148.49
   0   0   6 2881.61  168.78
   0   0  -6 2728.23  166.78
   0   0  -6 2928.01  168.68
  -2   0  -6  127.89   12.60
   2   0   6  123.49   13.00
  -4   0  -6  101.49    8.90
   4   0   6   95.39   12.50
  -4   0  -6   86.69   11.30
  -6   0  -6 2097.59  130.09
  -6   0  -6 2245.88  127.79
   6   0   6 2145.79  130.79
   8   0   6   -4.90    6.00
  -8   0  -6   12.90    6.20
  -8   0  -6    2.50    4.00
  10   0   6   48.20    7.30
 -10   0  -6   42.30    8.20
 -10   0  -6   50.69   16.30
  10   0   6   49.10   10.50
 -10   0  -6   59.49    8.90
 -12   0  -6  421.26   32.20
  12   0   6  409.36   33.50
 -12   0  -6  391.36   30.60
  12   0   6  432.36   29.30
  14   0   6  506.05   40.20
  14   0   6  542.25   35.80
 -14   0  -6  483.05   36.80
  16   0   6  679.93   45.90
  16   0   6  686.43   50.79
  18   0   6  541.35   38.80
  18   0   6  557.74   44.90
  20   0   6  360.26   30.00
  20   0   6  408.76   37.40
  22   0   6   77.79   18.60
  22   0   6  108.89   16.80
  29   1  -6  448.86   42.20
  27  -1  -6  119.29   20.00
  27  -1  -6  127.49   21.40
  27   1  -6  150.78   21.80
  27   1  -6   87.59   16.40
  25  -1  -6  252.47   27.40
  25  -1  -6  249.18   22.90
  25  -1  -6  253.57   27.20
  25   1  -6  241.28   29.50
  25   1  -6  231.88   21.40
  25   1  -6  230.28   25.70
  23  -1  -6  155.58   19.60
  23  -1  -6  104.49   19.10
  23  -1  -6  109.49   18.70
  23   1  -6  137.39   15.10
  23   1  -6  134.39   22.30
  23   1  -6  144.29   19.60
  21  -1  -6   -8.10    7.80
  21  -1  -6  -14.00    8.10
  21  -1  -6   -5.50    7.80
  21   1  -6   -0.50    6.00
  21   1  -6   13.30    8.30
  21   1  -6    2.10    8.20
  21   1  -6   -9.80    7.00
  19  -1  -6  131.89   17.60
  19  -1  -6  123.19   14.70
  19   1  -6  139.49   16.80
  19   1  -6  113.29   12.10
  19   1  -6  132.89   14.30
  17  -1  -6  718.83   44.60
  17  -1  -6  626.94   46.60
  17   1  -6  716.33   46.70
  15  -1  -6   83.09   10.80
 -15  -1   6   87.89   12.50
  15   1  -6  103.49    8.90
 -15   1   6   78.79   12.70
  15   1  -6   91.09   15.30
  13  -1  -6  588.94   38.30
 -13  -1   6  543.45   38.10
  13  -1  -6  488.75   35.70
 -13   1   6  552.14   38.30
  13   1  -6  574.54   37.60
 -13   1   6  544.05   35.20
  13   1  -6  615.14   34.30
  11  -1  -6 1383.86   82.79
 -11  -1   6 1422.86   84.49
  11  -1  -6 1329.57   84.29
 -11   1   6 1406.76   84.69
  11   1  -6 1402.16   83.99
 -11   1   6 1318.37   82.09
  -9  -1   6 2174.68  123.99
  -9  -1   6 2117.49  126.59
   9  -1  -6 2140.99  126.89
   9  -1  -6 2009.10  128.69
  -9   1   6 2199.68  125.29
   9   1  -6 2176.68  126.19
   9   1  -6 2055.69  126.19
  -9   1   6 2088.19  126.99
   7  -1  -6 1874.11  118.19
  -7  -1   6 2034.90  118.09
  -7   1   6 1948.41  118.29
   7   1  -6 1905.91  117.59
   7   1  -6 1985.80  118.09
  -7   1   6 2145.49  117.49
   5  -1  -6 3500.35  219.98
  -5  -1   6 3800.82  219.78
  -5  -1   6 4052.19  219.28
   5  -1  -6 3610.64  219.38
   5   1  -6 3678.93  218.58
  -5   1   6 3602.14  219.28
  -5   1   6 3731.33  219.08
   5   1  -6 3920.71  219.78
  -3  -1   6  868.91   51.99
  -3  -1   6  902.11   50.19
   3  -1  -6  818.82   51.89
   3  -1  -6  794.82   50.79
  -3   1   6  809.12   50.79
   3   1  -6  855.21   49.99
  -3   1   6  765.52   51.69
   3   1  -6  821.52   51.59
  -1  -1   6   40.60    7.80
   1  -1  -6   40.10    5.70
   1  -1  -6   39.20    6.60
  -1   1   6   43.80    7.90
   1   1  -6   49.10    7.80
   1   1  -6   43.20    4.70
   1  -1   6  240.38   19.10
  -1  -1  -6  247.38   18.70
   1   1   6  226.68   18.70
  -1   1  -6  260.57   16.00
  -1   1  -6  231.08   18.50
  -3  -1  -6  554.64   40.90
   3  -1   6  651.23   42.30
  -3  -1  -6  662.13   41.80
  -3   1  -6  685.53   38.70
  -3   1  -6  611.24   41.50
   3   1   6  659.83   42.00
   5  -1   6  466.55   33.10
  -5  -1  -6  457.15   31.90
  -5  -1  -6  426.76   30.10
   5   1   6  456.65   32.50
  -5   1  -6  509.65   32.40
   7  -1   6  389.26   30.10
  -7  -1  -6  466.05   29.00
  -7   1  -6  353.56   28.50
   7   1   6  425.86   29.60
   7   1   6  347.97   26.70
  -9  -1  -6  203.28   19.00
   9  -1   6  199.48   21.40
  -9  -1  -6  184.98   17.00
   9   1   6  211.48   17.90
  -9   1  -6  205.18   25.70
   9   1   6  245.58   20.90
  -9   1  -6  208.98   17.10
 -11  -1  -6  308.57   24.00
  11  -1   6  310.57   28.30
 -11  -1  -6  307.87   35.70
  11   1   6  324.97   27.60
  11   1   6  354.76   25.40
 -11   1  -6  333.77   24.40
 -11   1  -6  285.07   26.30
  13  -1   6  861.61   59.79
 -13  -1  -6  883.41   58.09
 -13  -1  -6  925.01   57.39
  13   1   6  862.51   59.19
 -13   1  -6  851.61   56.39
  13   1   6  839.42   56.59
  15  -1   6 1062.49   72.39
  15   1   6 1112.29   71.49
  15   1   6 1035.40   68.79
  17  -1   6  781.42   57.99
  17   1   6  825.72   56.89
  17   1   6  768.72   53.49
  19  -1   6  282.37   32.10
  19  -1   6  282.57   23.30
  19   1   6  270.17   26.30
  19   1   6  294.37   31.10
  21  -1   6   40.50   15.70
  21   1   6   45.40   15.40
  21   1   6   38.90   15.20
  28  -2  -6    7.90   13.80
  28  -2  -6    1.80   12.40
  28  -2  -6   -6.10   10.70
  28   2  -6  -10.50    9.80
  28   2  -6   -7.10    8.90
  28   2  -6    8.80   13.30
  26  -2  -6   45.20   14.50
  26  -2  -6   36.50   12.40
  26   2  -6   17.30    8.20
  26   2  -6   36.10   14.90
  26   2  -6   30.30   13.90
  24  -2  -6   14.10   11.70
  24  -2  -6   11.80   10.50
  24  -2  -6   19.30   10.20
  24   2  -6    8.90    9.10
  24   2  -6    2.30   11.30
  24   2  -6   13.30    7.30
  22  -2  -6  217.68   23.30
  22  -2  -6  224.88   22.40
  22   2  -6  201.28   19.30
  22   2  -6  199.48   16.50
  22   2  -6  149.79   23.90
  20  -2  -6  440.76   34.20
  20  -2  -6  529.45   37.40
  20   2  -6  554.94   33.30
  20   2  -6  391.86   37.20
  20   2  -6  462.85   35.80
  18  -2  -6  655.43   41.40
  18  -2  -6  496.25   37.90
  18   2  -6  492.15   40.70
  18   2  -6  602.94   39.70
 -16  -2   6  629.94   44.40
  16  -2  -6  642.24   42.30
  16  -2  -6  675.63   44.80
  16   2  -6  652.73   43.40
 -16   2   6  617.74   44.40
 -14  -2   6  214.78   25.00
  14  -2  -6  232.28   18.40
  14  -2  -6  214.58   20.00
 -14   2   6  227.68   17.30
 -14   2   6  207.58   19.70
  14   2  -6  224.18   18.90
 -12  -2   6  168.38   16.10
  12  -2  -6  181.48   15.50
  12  -2  -6  172.18   16.50
  12   2  -6  162.18   15.70
 -12   2   6  187.48   14.40
 -12   2   6  173.28   15.90
  12   2  -6  160.08   14.20
  10  -2  -6   84.39   10.40
 -10  -2   6   76.79   10.00
  10  -2  -6   68.79    9.40
 -10   2   6   86.49    9.20
 -10   2   6   75.29    9.70
  10   2  -6   66.79    9.60
  -8  -2   6    6.40    3.90
   8  -2  -6    5.50    3.80
   8  -2  -6   13.40    4.50
  -8   2   6    7.20    3.50
   8   2  -6    8.30    3.90
  -8   2   6    7.10    3.80
   6  -2  -6   32.90    6.30
   6  -2  -6   22.90    5.00
  -6  -2   6   23.60    5.00
   6   2  -6   30.60    7.50
   6   2  -6   32.50    4.80
  -6   2   6   32.20    5.30
  -6   2   6   36.90    5.90
  -4  -2   6  195.88   15.50
   4  -2  -6  201.08   15.30
   4  -2  -6  190.68   15.90
  -4  -2   6  197.58   13.70
   4   2  -6  196.98   15.40
   4   2  -6  195.98   13.50
  -4   2   6  217.48   15.20
  -4   2   6  205.28   15.70
   2  -2  -6  308.07   22.80
   2  -2  -6  313.47   22.00
  -2  -2   6  338.37   20.00
  -2  -2   6  298.37   22.60
   2   2  -6  309.67   19.80
  -2   2   6  336.47   23.10
  -2   2   6  325.07   21.60
   2   2  -6  334.67   22.70
  -2   2   6  316.07   23.00
   0  -2  -6  780.72   48.50
   0  -2   6  774.32   49.60
   0  -2  -6  771.02   49.40
   0   2   6  786.02   49.60
   0   2  -6  780.32   49.10
  -2  -2  -6  430.76   27.80
  -2  -2  -6  398.26   28.50
   2  -2   6  406.16   29.40
   2   2   6  423.26   28.90
  -2   2  -6  398.16   28.30
  -4  -2  -6 1664.93   97.99
  -4  -2  -6 1591.64   98.79
   4  -2   6 1632.64   99.89
   4   2   6 1603.34   98.99
  -4   2  -6 1638.64   98.89
  -6  -2  -6 1264.07   76.89
  -6  -2  -6 1233.68   77.69
   6  -2   6 1237.28   78.99
  -6   2  -6 1274.57   75.39
   6   2   6 1236.28   77.99
   6   2   6 1281.57   77.49
  -6   2  -6 1257.07   77.99
  -8  -2  -6  318.77   24.60
  -8  -2  -6  308.77   23.80
   8  -2   6  305.67   26.60
  -8   2  -6  328.17   22.10
   8   2   6  293.07   24.90
   8   2   6  331.57   24.80
 -10  -2  -6   82.19   13.60
 -10  -2  -6   96.29   14.40
  10  -2   6  115.19   17.90
  10   2   6  107.89   15.90
 -10   2  -6   80.79   14.30
  10   2   6  111.99   15.50
 -10   2  -6  125.09   12.30
  12  -2   6    1.30    9.30
 -12  -2  -6    0.60    6.20
 -12  -2  -6  -12.10   12.10
  12   2   6   -0.60    8.40
  12   2   6   -7.80    7.30
 -12   2  -6    4.80    6.20
  14  -2   6  100.59   16.30
 -14  -2  -6   99.69   17.00
 -14  -2  -6   67.09   13.90
  14   2   6  106.69   17.70
  14   2   6  110.79   19.00
 -14   2  -6   88.69   15.40
  16  -2   6   80.19   17.20
  16   2   6   72.89   14.10
  16   2   6   74.89   13.40
  18  -2   6  227.88   30.30
  18   2   6  227.38   26.80
  20  -2   6   50.59   16.90
  20   2   6   67.49   15.70
  22  -2   6   29.80   17.20
  22   2   6   39.10   15.40
  22   2   6   31.60   12.70
  27  -3  -6   55.39   13.70
  27  -3  -6   28.00   14.70
  27   3  -6    6.90   13.70
  27   3  -6    6.00    9.30
  25  -3  -6    9.90   11.90
  25  -3  -6   12.40   12.20
  25   3  -6    3.20   12.80
  23  -3  -6   40.00   12.20
  23  -3  -6   56.59   12.90
  23   3  -6   27.10   11.30
  23   3  -6   46.30    8.20
  21  -3  -6  504.15   36.30
  21  -3  -6  445.26   38.00
  21  -3  -6  535.65   37.70
  21   3  -6  470.15   32.90
  21   3  -6  483.25   40.20
  19  -3  -6  656.13   45.50
  19  -3  -6  675.53   47.30
  19   3  -6  628.74   48.10
  19   3  -6  666.43   41.70
  17  -3  -6  699.33   45.60
  17  -3  -6  708.13   47.40
  17   3  -6  630.14   47.90
  15  -3  -6 1045.50   70.19
  15  -3  -6 1194.18   72.19
 -15  -3   6 1098.99   71.29
 -15   3   6 1087.89   71.59
  15   3  -6  999.10   71.89
  15   3  -6 1208.68   72.09
 -15   3   6 1224.08   69.99
 -13  -3   6  393.06   28.90
  13  -3  -6  379.86   28.30
  13  -3  -6  409.86   30.10
  13   3  -6  400.36   28.20
  13   3  -6  342.67   29.90
  13   3  -6  440.16   26.60
 -13   3   6  425.16   27.90
 -11  -3   6  146.49   13.40
  11  -3  -6  138.69   14.30
  11  -3  -6  129.59   13.50
 -11   3   6  133.99   12.50
  11   3  -6  112.29   15.00
  11   3  -6  143.19   13.00
  11   3  -6  131.59   11.40
 -11   3   6  150.48   13.80
   9  -3  -6   82.19   11.30
   9  -3  -6   92.79   11.20
  -9  -3   6   92.09   10.00
  -9   3   6   99.49   10.90
   9   3  -6   85.99    9.30
   9   3  -6   94.79    9.90
  -7  -3   6  882.01   54.39
   7  -3  -6  852.91   55.69
   7  -3  -6  902.01   55.59
  -7  -3   6  781.72   54.09
  -7   3   6  904.21   55.49
   7   3  -6  892.91   54.99
   7   3  -6  869.51   53.79
  -7   3   6  998.20   55.39
  -5  -3   6 2597.14  161.98
   5  -3  -6 2690.63  162.68
   5  -3  -6 2669.33  162.78
  -5  -3   6 2794.82  160.98
  -5   3   6 2944.01  162.68
  -5   3   6 2787.62  162.58
   5   3  -6 2661.33  161.68
   5   3  -6 2786.72  160.58
  -3  -3   6  244.28   17.80
  -3  -3   6  239.18   14.70
   3  -3  -6  198.48   16.80
   3  -3  -6  213.38   17.70
   3   3  -6  227.28   17.00
   3   3  -6  214.88   14.30
  -3   3   6  228.58   17.80
  -3   3   6  207.78   16.40
   1  -3  -6   28.00    5.60
   1  -3  -6   38.00    6.90
   1  -3  -6   27.70    5.50
  -1  -3   6   28.70    6.50
   1   3  -6   30.40    5.60
  -1   3   6   37.30    7.30
  -1  -3  -6  632.14   42.30
  -1  -3  -6  658.93   42.00
   1  -3   6  643.74   43.00
   1   3   6  673.53   42.60
  -1   3  -6  635.14   41.80
   3  -3   6 3114.19  181.28
  -3  -3  -6 3013.60  179.68
  -3  -3  -6 2911.41  179.98
   3   3   6 3144.39  180.48
  -3   3  -6 2973.80  179.88
   5  -3   6 3233.18  189.58
  -5  -3  -6 3009.00  187.48
  -5  -3  -6 3013.90  187.78
  -5   3  -6 3118.29  188.08
   5   3   6 3171.68  188.48
   5   3   6 3238.68  188.18
  -5   3  -6 3353.76  184.88
   7  -3   6 2671.03  156.08
  -7  -3  -6 2443.26  153.68
  -7  -3  -6 2281.27  153.28
   7   3   6 2617.74  154.08
  -7   3  -6 2638.74  151.78
   7   3   6 2758.62  155.08
  -9  -3  -6  758.82   57.69
   9  -3   6  962.40   61.29
  -9  -3  -6  847.32   58.09
  -9   3  -6  886.51   58.69
   9   3   6  910.91   58.69
  -9   3  -6  982.80   56.09
   9   3   6  992.80   59.99
 -11  -3  -6    1.10    6.30
  11  -3   6   12.70   10.40
 -11  -3  -6   18.20    7.80
 -11   3  -6    7.90    5.80
  11   3   6    1.00    7.20
  11   3   6    0.00    8.20
  13  -3   6  340.07   32.00
 -13  -3  -6  336.47   34.90
 -13  -3  -6  251.87   27.80
  13   3   6  311.17   27.80
  13   3   6  323.57   29.30
 -13   3  -6  342.57   25.20
  15  -3   6  165.48   25.70
 -15  -3  -6  114.79   18.60
 -15  -3  -6  115.59   17.60
 -15   3  -6  151.88   17.50
  17  -3   6   67.49   16.70
  17   3   6   53.49   13.80
  19  -3   6  225.58   31.80
  19   3   6  172.88   24.40
  19   3   6  200.78   25.90
  21  -3   6    1.20   15.30
  21   3   6    3.30   11.70
  21   3   6   -9.20   10.00
  28  -4  -6   91.19   21.00
  28  -4  -6   77.69   17.90
  28   4  -6  134.79   26.80
  26  -4  -6   91.19   17.30
  26  -4  -6   90.89   18.10
  26   4  -6   84.19   19.10
  24  -4  -6   13.10   11.30
  24  -4  -6   26.10   11.80
  24   4  -6    8.10   12.40
  22  -4  -6  181.68   22.30
  22  -4  -6  168.48   22.50
  22   4  -6  142.79   24.40
  20  -4  -6  466.45   39.00
  20   4  -6  533.15   41.00
  18  -4  -6 1135.19   71.99
  18  -4  -6 1144.49   73.69
  18   4  -6 1088.09   74.19
  16  -4  -6  758.22   59.29
 -16  -4   6  960.20   65.29
  16  -4  -6  962.50   60.69
  16   4  -6  964.00   61.79
  14  -4  -6  541.15   37.00
  14  -4  -6  506.75   35.50
 -14  -4   6  494.85   35.80
  14   4  -6  472.15   37.20
 -14   4   6  496.25   34.70
 -14   4   6  516.85   36.10
  12  -4  -6   80.19   11.80
  12  -4  -6   93.29   12.30
 -12  -4   6   86.19   11.60
 -12   4   6   76.29   10.90
  12   4  -6   88.39   13.90
 -10  -4   6  158.98   14.70
  10  -4  -6  168.28   15.70
  10  -4  -6  159.08   15.90
  10   4  -6  172.38   12.50
  10   4  -6  123.29   16.20
 -10   4   6  180.78   14.80
 -10   4   6  160.18   15.00
  -8  -4   6 3213.18  188.88
   8  -4  -6 3252.07  193.18
  -8  -4   6 3353.06  191.58
  -8  -4   6 2895.31  190.48
   8  -4  -6 3188.08  192.68
  -8   4   6 3572.04  192.58
   8   4  -6 3206.48  190.28
  -8   4   6 3253.27  192.58
   8   4  -6 3294.27  193.28
  -6  -4   6 1824.52  103.19
  -6  -4   6 1736.43  100.69
   6  -4  -6 1603.54  103.79
   6  -4  -6 1694.23  103.99
  -6  -4   6 1611.04  102.39
  -6   4   6 1685.43  103.39
   6   4  -6 1818.92  103.09
   6   4  -6 1610.94  103.49
  -6   4   6 1819.42  103.59
  -4  -4   6 4235.28  253.47
   4  -4  -6 4220.08  254.07
  -4  -4   6 4543.55  251.57
   4  -4  -6 4254.97  254.27
  -4   4   6 4321.17  253.67
   4   4  -6 4200.78  252.57
   4   4  -6 4254.07  253.37
  -4   4   6 4466.65  254.07
  -2  -4   6   72.79   10.70
   2  -4  -6   62.49    9.30
   2  -4  -6   64.79    9.70
   2  -4  -6   62.99    9.90
   2   4  -6   79.99    9.50
   2   4  -6   58.49    8.70
  -2   4   6   65.39   10.50
   0  -4  -6   69.99    9.70
   0  -4  -6   89.99   10.90
   0  -4   6   74.49   11.80
   0  -4  -6   56.39   10.20
   0   4  -6   85.99   10.40
   0   4  -6   82.69    8.50
   0   4   6   78.49   12.10
  -2  -4  -6  937.31   60.59
  -2  -4  -6  991.10   60.59
   2  -4   6  934.31   61.59
  -2   4  -6  956.40   60.19
   2   4   6  978.20   61.49
  -4  -4  -6 1542.85   94.69
  -4  -4  -6 1602.94   94.99
   4  -4   6 1561.54   96.39
   4   4   6 1448.26   95.49
   4   4   6 1524.75   94.59
  -4   4  -6 1599.94   94.69
  -6  -4  -6 1598.54   94.09
   6  -4   6 1679.23   96.59
  -6  -4  -6 1583.24   93.69
   6   4   6 1358.66   94.49
   6   4   6 1464.85   93.39
  -6   4  -6 1576.24   89.89
  -6   4  -6 1395.76   93.59
  -8  -4  -6  911.31   54.39
  -8  -4  -6  832.02   52.99
   8  -4   6  826.42   55.89
  -8   4  -6  756.42   52.89
   8   4   6  739.03   52.59
  -8   4  -6  796.02   49.80
  10  -4   6   45.60   12.00
 -10   4  -6   57.79    8.00
  10   4   6   46.10    9.40
  10   4   6   40.60   11.70
 -12  -4  -6  767.72   49.90
  12  -4   6  802.02   55.09
 -12  -4  -6  744.53   51.59
 -12   4  -6  745.03   47.80
  12   4   6  726.23   50.09
  12   4   6  640.74   54.69
  14  -4   6  251.97   29.60
 -14   4  -6  193.18   19.40
  14   4   6  211.68   22.50
  14   4   6  181.68   24.40
  16  -4   6   97.19   18.70
 -16  -4  -6   80.99   14.20
 -16   4  -6  106.09   15.00
  16   4   6   89.99   15.90
  16   4   6  134.49   19.90
  18  -4   6  105.29   21.40
  18   4   6  135.69   21.80
  18   4   6  116.69   22.90
  20  -4   6   18.70   16.80
  20   4   6   32.40   12.50
  20   4   6   21.40   13.30
  22   4   6  -16.40   11.40
  27  -5  -6   65.19   16.90
  27  -5  -6   81.49   19.40
  27   5  -6   85.19   18.90
  25  -5  -6   72.79   20.90
  25  -5  -6   54.59   15.60
  25   5  -6   80.59   18.70
  23  -5  -6   64.09   14.00
  23  -5  -6   81.49   15.40
  21  -5  -6   55.19   13.50
  21  -5  -6   38.50   11.10
  21   5  -6   29.80   12.30
  19  -5  -6   -4.90    9.20
  19   5  -6   19.50   10.20
  17  -5  -6   11.20    8.10
  17  -5  -6   19.50   10.20
  17   5  -6    7.70    9.50
 -15  -5   6    4.10    7.00
  15  -5  -6   10.70    7.10
  15  -5  -6   -1.40    7.60
 -15   5   6   -1.50    6.80
  15   5  -6    3.90    7.60
 -13  -5   6   68.39   15.30
  13  -5  -6   93.69   14.20
  13  -5  -6  120.69   14.90
  13   5  -6  119.99   16.90
 -13   5   6   99.39   13.60
 -13   5   6   89.69   13.90
  11  -5  -6  124.39   16.00
 -11  -5   6  142.49   14.50
  11  -5  -6  146.39   15.90
 -11   5   6  144.69   14.90
 -11   5   6  135.29   14.60
  11   5  -6  172.98   19.30
   9  -5  -6  161.88   17.20
  -9  -5   6  190.18   14.20
  -9  -5   6  200.58   15.80
   9  -5  -6  184.38   17.20
  -9  -5   6  193.28   12.80
  -9   5   6  188.38   16.70
   9   5  -6  187.98   18.60
  -9   5   6  173.38   16.00
   9   5  -6  179.58   13.30
   7  -5  -6  283.57   23.50
   7  -5  -6  299.17   24.10
  -7  -5   6  289.97   21.40
  -7  -5   6  277.87   20.90
  -7   5   6  351.66   23.50
   7   5  -6  319.47   24.10
  -7   5   6  294.97   22.50
   5  -5  -6   38.50    7.10
   5  -5  -6   38.10    8.50
  -5  -5   6   53.19    6.70
  -5  -5   6   36.70    6.20
  -5  -5   6   55.99    9.70
  -5   5   6   45.50    7.90
   5   5  -6   39.70    7.40
   5   5  -6   49.60    7.90
  -5   5   6   47.30    7.90
   3  -5  -6    1.50    4.70
  -3  -5   6   12.50    6.20
  -3  -5   6   -0.30    3.60
   3  -5  -6   -1.80    6.20
   3  -5  -6    6.40    5.60
   3   5  -6    5.70    4.70
   3   5  -6    6.60    4.40
  -3   5   6    3.00    5.20
   1  -5  -6   32.60    7.30
   1  -5  -6   42.10    8.40
   1  -5  -6   40.00    7.30
  -1  -5   6   50.49    9.40
   1   5  -6   43.00    8.50
  -1   5   6   38.90    8.40
   1   5  -6   57.79    9.10
   1  -5   6   47.40    9.20
  -1  -5  -6   30.90    7.80
  -1  -5  -6   38.50    7.80
  -1  -5  -6   41.20    8.40
  -1   5  -6   49.70    7.80
   1   5   6   46.60    9.30
  -1   5  -6   39.20    7.30
  -3  -5  -6  238.08   19.40
  -3  -5  -6  208.28   18.90
   3  -5   6  234.58   21.20
  -3   5  -6  220.48   18.50
   3   5   6  179.68   20.20
   5  -5   6   82.59   14.80
  -5  -5  -6   82.19   12.50
  -5   5  -6   63.29   11.00
   5   5   6   79.59   12.50
   5   5   6   67.39   12.40
  -7  -5  -6   69.29   13.60
  -7  -5  -6   49.90    8.80
   7  -5   6   47.50   12.20
  -7   5  -6   51.09    8.80
   7   5   6   22.20   10.20
   7   5   6   38.50    8.40
   9  -5   6   17.80   10.90
  -9  -5  -6   16.60    7.80
  -9  -5  -6   24.20    8.30
   9   5   6   18.80    7.80
  -9   5  -6   21.50    5.00
   9   5   6   14.20    9.80
 -11  -5  -6    4.80    8.10
 -11  -5  -6    2.60    8.00
  11  -5   6    8.10   11.60
 -11   5  -6   19.80    6.40
  11   5   6    6.00   10.30
  11   5   6   11.80    8.40
  13  -5   6    3.20   12.00
 -13  -5  -6    1.00    8.80
 -13   5  -6    8.40    7.00
  13   5   6    0.70    8.00
  13   5   6   -3.80   10.00
 -15  -5  -6   92.79   16.00
  15  -5   6   94.09   19.50
  15   5   6  134.09   18.50
 -15   5  -6   75.89   15.90
  15   5   6  109.49   21.10
  17  -5   6   96.09   20.50
 -17  -5  -6   96.79   14.60
  17   5   6  129.69   19.80
 -17   5  -6  110.09   17.70
  17   5   6   88.79   17.40
  19  -5   6   92.19   21.20
  19   5   6  118.59   20.20
  19   5   6   78.19   17.10
  21  -5   6   19.80   17.10
  21   5   6   13.20   11.60
  21   5   6   27.00   15.30
  26  -6  -6   20.60   13.20
  26  -6  -6   -7.20   13.50
  26   6  -6   15.60   13.80
  24  -6  -6    7.10   13.80
  24  -6  -6    5.70   19.30
  24   6  -6   14.20   12.90
  22  -6  -6  136.59   22.60
  22  -6  -6  143.69   22.30
  22   6  -6  129.89   25.00
  20  -6  -6  404.66   32.70
  20  -6  -6  351.66   33.20
  20   6  -6  357.26   34.70
  18  -6  -6  696.93   50.79
  18   6  -6  687.13   51.29
  16  -6  -6  469.85   37.60
 -16   6   6  462.15   35.90
  16   6  -6  508.15   38.70
  14  -6  -6  132.49   16.20
 -14  -6   6  115.99   15.60
 -14   6   6   92.49   15.50
  14   6  -6  120.39   18.30
  12  -6  -6  189.98   19.30
  12  -6  -6  191.38   19.70
 -12  -6   6  253.07   22.50
  12   6  -6  203.78   21.30
 -12   6   6  143.19   18.10
 -12   6   6  195.48   17.90
 -10  -6   6  148.59   11.70
  10  -6  -6  129.19   16.40
 -10  -6   6  134.89   14.70
 -10   6   6  138.19   14.60
  10   6  -6  145.49   21.20
 -10   6   6  165.98   18.90
   8  -6  -6  206.48   19.00
   8  -6  -6  184.18   19.20
  -8  -6   6  197.88   16.10
  -8  -6   6  205.38   17.00
  -8  -6   6  212.68   15.60
   8   6  -6  214.58   15.80
  -8   6   6  208.48   18.50
   8   6  -6  184.68   19.50
  -8   6   6  226.98   19.70
   6  -6  -6  249.08   22.00
   6  -6  -6  205.18   18.90
  -6  -6   6  210.58   17.80
  -6  -6   6  223.68   16.70
   6   6  -6  227.98   19.60
  -6   6   6  258.77   20.60
   6   6  -6  203.48   16.10
  -6   6   6  227.18   19.20
   4  -6  -6  711.73   48.30
  -4  -6   6  656.83   43.40
  -4  -6   6  712.23   45.80
  -4  -6   6  706.73   43.10
   4  -6  -6  750.92   50.79
   4  -6  -6  685.03   46.40
   4   6  -6  650.43   43.70
  -4   6   6  747.53   46.50
   4   6  -6  705.63   45.40
   2  -6  -6   43.90   10.50
  -2  -6   6   38.10    6.30
   2  -6  -6   41.30    9.60
   2  -6  -6   35.00    7.80
  -2  -6   6   48.60    9.50
   2   6  -6   48.60    7.20
  -2   6   6   31.70    7.80
   2   6  -6   39.90    6.90
   0  -6   6  200.18   15.90
   0  -6  -6  168.28   17.10
   0  -6  -6  204.58   18.10
   0  -6   6  190.58   19.10
   0  -6  -6  219.38   25.80
   0   6  -6  179.38   16.00
   0   6  -6  174.38   15.20
   0   6   6  196.98   18.40
  -2  -6  -6  494.05   37.00
   2  -6   6  519.35   38.90
   2  -6   6  560.24   36.00
  -2  -6  -6  554.64   37.70
  -2   6  -6  517.85   36.10
  -2   6  -6  531.15   34.10
   2   6   6  550.84   38.20
  -4  -6  -6  866.81   58.49
   4  -6   6 1037.30   71.29
  -4  -6  -6  862.21   57.69
  -4   6  -6  842.02   56.99
   4   6   6  793.42   63.59
   4   6   6 1021.60   65.69
  -6  -6  -6 1318.77   86.59
   6  -6   6 1386.66   90.49
   6   6   6 1414.16   88.39
   6   6   6 1479.35   90.79
  -8  -6  -6  639.84   43.30
  -8  -6  -6  564.24   53.69
   8  -6   6  626.94   48.30
   8   6   6  674.23   49.70
   8   6   6  627.44   45.50
  10  -6   6  215.48   28.10
 -10  -6  -6  213.58   21.30
  10   6   6  264.17   22.00
  10   6   6  213.78   26.60
  10   6   6  206.78   25.50
 -10   6  -6  190.98   16.70
  12  -6   6  104.69   19.30
 -12  -6  -6  101.89   16.00
  12   6   6  100.89   18.10
  12   6   6   77.69   16.40
  12   6   6  119.69   17.10
 -12   6  -6   97.19   13.00
 -14  -6  -6  114.49   16.70
  14  -6   6   64.59   17.70
  14   6   6   74.59   16.30
 -14   6  -6   71.49   10.90
  16  -6   6  200.98   31.90
  16   6   6  208.68   27.80
 -16   6  -6  159.98   20.00
  18  -6   6   96.39   22.80
  18   6   6   64.89   15.60
  18   6   6   74.19   17.20
  20  -6   6   26.70   18.70
 -20  -6  -6   24.70   11.50
  20   6   6   21.70   11.50
  20   6   6    8.90   12.90
  25  -7  -6   -1.20   13.10
  25  -7  -6   -0.90   12.60
  25   7  -6   -1.50   13.50
  23  -7  -6  181.18   30.80
  23  -7  -6  187.48   25.20
  23   7  -6  197.48   28.20
  21  -7  -6  407.56   39.40
  21  -7  -6  463.55   38.70
  21   7  -6  558.44   43.40
  19  -7  -6  764.22   51.79
  19  -7  -6  641.34   52.39
  19   7  -6  773.02   54.89
  17  -7  -6  719.63   54.39
  17   7  -6  779.72   54.99
  15  -7  -6  344.27   30.90
 -15   7   6  354.26   29.90
  15   7  -6  330.67   31.20
 -13  -7   6  182.78   20.00
  13  -7  -6  196.48   20.70
  13   7  -6  168.88   21.70
 -13   7   6  180.78   20.00
  11  -7  -6  223.78   20.90
 -11  -7   6  237.38   16.60
  11   7  -6  175.38   22.40
 -11   7   6  228.18   20.80
  -9  -7   6  158.88   15.80
   9  -7  -6  150.58   16.70
   9  -7  -6  159.98   18.20
   9   7  -6  146.29   18.30
  -9   7   6  154.08   15.60
  -9   7   6  168.48   16.90
   7  -7  -6  605.04   42.10
  -7  -7   6  623.54   40.10
   7  -7  -6  622.54   43.10
   7  -7  -6  566.44   42.60
  -7  -7   6  594.64   38.80
  -7  -7   6  619.64   40.20
   7   7  -6  611.64   42.40
  -7   7   6  620.44   41.50
   7   7  -6  608.54   38.10
  -7   7   6  683.73   42.50
  -5  -7   6  637.64   37.00
   5  -7  -6  568.04   39.80
  -5  -7   6  582.14   36.90
   5  -7  -6  522.75   40.40
  -5  -7   6  576.24   38.80
   5  -7  -6  544.65   44.10
   5   7  -6  523.05   38.90
  -5   7   6  566.64   39.50
   5   7  -6  625.34   36.70
   3  -7  -6  310.27   26.40
  -3  -7   6  357.36   22.20
   3  -7  -6  285.37   24.60
   3  -7  -6  233.58   27.30
  -3  -7   6  333.07   24.90
   3   7  -6  354.56   22.30
  -3   7   6  289.07   24.50
   3   7  -6  281.87   23.30
   1  -7  -6   65.99   11.30
   1  -7  -6   52.49    9.40
  -1  -7   6   49.00   10.20
   1  -7  -6   43.30    8.10
  -1  -7   6   54.19    9.20
   1  -7  -6   45.40    9.10
  -1  -7   6   54.09    8.40
   1   7  -6   48.80    7.70
  -1   7   6   51.19    9.60
   1   7  -6   43.40    8.20
   1  -7   6  928.11   61.89
  -1  -7  -6  978.20   60.89
   1  -7   6 1100.79   63.99
  -1  -7  -6  895.81   60.39
  -1  -7  -6  900.41   60.09
  -1   7  -6  764.22   61.89
  -1   7  -6  904.61   57.49
   1   7   6  966.20   60.79
  -3  -7  -6 1734.73  110.89
   3  -7   6 1792.32  114.39
   3  -7   6 1899.01  110.29
  -3  -7  -6 1748.72  114.59
  -3   7  -6 1897.41  108.49
   3   7   6 1897.91  111.99
  -3   7  -6 1814.62  110.09
   3   7   6 1687.53  113.79
   5  -7   6 2372.36  146.19
  -5  -7  -6 2336.87  142.29
   5   7   6 2210.78  145.59
   5   7   6 2481.85  143.79
   7  -7   6 1169.58   80.69
  -7  -7  -6 1311.07   76.19
   7   7   6 1085.89   79.49
   7   7   6 1203.08   77.59
   9  -7   6  625.94   49.90
  -9  -7  -6  656.83   43.00
   9   7   6  636.74   45.70
   9   7   6  515.95   46.70
 -11  -7  -6   50.59   10.30
  11  -7   6   92.69   18.70
  11   7   6   55.79   14.90
 -11   7  -6   45.10    8.00
  11   7   6   64.49   15.40
 -13  -7  -6   -5.10    8.30
  13  -7   6  -10.80   13.60
  13   7   6   -4.10   12.00
  13   7   6  -13.20   11.00
 -13   7  -6   -8.10    6.40
 -15  -7  -6  152.68   20.60
  15  -7   6  161.98   32.40
  15   7   6  156.68   27.40
 -15   7  -6  200.28   18.90
  15   7   6  191.98   26.20
  17  -7   6   70.69   19.50
  17   7   6  102.49   18.80
  17   7   6   56.59   15.70
  19  -7   6   36.40   19.90
  19   7   6   44.30   17.60
  24  -8  -6   17.90   13.20
  24  -8  -6   20.20   12.70
  24   8  -6   -0.80   13.00
  22  -8  -6  166.78   27.30
  22  -8  -6  232.58   27.10
  22   8  -6  212.18   29.00
  20  -8  -6  322.37   32.30
  18  -8  -6  455.95   40.00
  18   8  -6  524.25   42.00
  16  -8  -6  468.15   39.70
  16   8  -6  503.85   40.80
 -16   8   6  483.95   38.30
  14  -8  -6  431.46   36.50
 -14   8   6  428.66   35.50
  14   8  -6  471.25   37.60
  12  -8  -6   13.30    8.60
 -12  -8   6    7.00    9.10
  12   8  -6   18.60   10.00
 -12   8   6   -1.40    8.10
 -10  -8   6  216.38   23.60
 -10  -8   6  295.97   21.50
  10  -8  -6  289.47   25.50
 -10   8   6  306.87   25.10
  10   8  -6  284.67   26.60
  -8  -8   6   92.79   12.40
   8  -8  -6   91.99   13.90
  -8  -8   6   99.79   13.10
  -8  -8   6   88.89   11.30
  -8   8   6  102.89   14.50
   8   8  -6  111.59   16.50
  -6  -8   6   75.99   13.30
  -6  -8   6   94.19   11.10
   6  -8  -6  107.89   13.70
  -6  -8   6   73.09   10.00
  -6  -8   6   87.99   12.00
   6   8  -6   75.09   13.90
  -6   8   6   93.59   13.50
  -4  -8   6  189.48   24.10
  -4  -8   6  187.18   15.20
  -4  -8   6  162.98   19.10
  -4  -8   6  185.68   15.70
   4  -8  -6  204.98   19.20
  -4   8   6  207.58   19.30
   4   8  -6  173.88   18.30
  -2  -8   6   33.70    9.20
  -2  -8   6   26.90    9.70
  -2  -8   6   34.10    6.80
   2  -8  -6   37.00    9.30
   2   8  -6   35.90    7.80
  -2   8   6   33.60    9.10
   2   8  -6   30.60    5.80
   0  -8   6    3.10    5.50
   0  -8  -6   -1.20    7.60
   0  -8   6   -5.90    7.50
   0  -8   6   -9.10    5.30
   0  -8  -6    7.30    6.10
   0   8  -6    7.50    5.60
   0   8   6   -2.50    6.60
   0   8  -6    2.20    5.20
   2  -8   6  528.95   42.40
  -2  -8  -6  523.85   39.50
   2  -8   6  539.35   38.30
  -2  -8  -6  551.14   40.00
   2  -8   6  595.94   38.10
   2   8   6  532.55   40.10
  -2   8  -6  550.44   37.60
  -2   8  -6  600.84   37.30
   4  -8   6  754.92   50.89
   4  -8   6  769.42   57.39
  -4  -8  -6  848.92   53.89
   4   8   6  849.81   54.59
   4   8   6  738.93   57.29
  -6  -8  -6  469.85   33.50
   6  -8   6  399.16   37.80
   6   8   6  449.46   34.80
   6   8   6  353.86   36.80
  -8  -8  -6  680.93   45.10
   8  -8   6  617.04   51.49
   8   8   6  589.84   49.90
   8   8   6  669.53   47.40
  10  -8   6  229.08   30.90
 -10  -8  -6  261.27   24.00
  10   8   6  234.58   29.60
  10   8   6  253.37   27.10
  12  -8   6   18.00   15.60
 -12  -8  -6    0.20    9.00
 -12   8  -6   -8.20    5.70
  12   8   6    0.50   12.10
  12   8   6    6.10   12.30
  14  -8   6   46.10   26.90
 -14  -8  -6   24.90   10.40
  14   8   6   18.70   14.20
 -14   8  -6   18.90    8.40
  14   8   6   19.30   13.50
  16  -8   6   52.99   21.10
 -16  -8  -6   35.30   11.30
  16   8   6   60.89   16.10
  16   8   6   56.89   19.90
 -16   8  -6   53.69   12.00
 -18  -8  -6    2.80   11.50
  18  -8   6   -3.10   16.60
  18   8   6   12.90   14.90
  18   8   6   11.60   13.60
 -18   8  -6   12.20   12.30
  23  -9  -6   68.59   16.00
  23  -9  -6   33.40   15.00
  23   9  -6   27.20   15.40
  21  -9  -6   11.70   11.00
  21  -9  -6   17.30   16.10
  21   9  -6   -4.10   13.10
  19  -9  -6   21.10   10.70
  19  -9  -6   -4.80   10.80
  19   9  -6    5.60   12.10
  17  -9  -6   16.60   10.90
  17   9  -6    9.50   11.20
  15  -9  -6   17.90    9.90
 -15   9   6    7.80    9.40
  15   9  -6   13.70   10.90
  13  -9  -6   -7.70    9.10
  13   9  -6    6.40   10.80
 -13   9   6    5.00    9.20
 -11  -9   6  532.15   35.30
 -11  -9   6  492.25   38.10
  11  -9  -6  490.15   39.40
  11   9  -6  490.55   40.20
 -11   9   6  512.25   39.00
   9  -9  -6  566.94   43.10
  -9   9   6  573.34   42.30
   9   9  -6  601.54   43.40
  -7  -9   6 1453.15   87.19
   7  -9  -6 1429.46   89.99
  -7  -9   6 1525.75   87.49
  -7  -9   6 1366.36   85.89
  -7   9   6 1303.07   88.39
   7   9  -6 1354.36   88.69
  -5  -9   6  578.04   44.10
   5  -9  -6  610.14   42.10
  -5  -9   6  498.55   37.90
  -5  -9   6  624.84   38.60
  -5  -9   6  571.14   41.00
  -5   9   6  574.24   41.10
   5   9  -6  565.64   40.80
  -3  -9   6  663.73   41.40
  -3  -9   6  661.33   44.10
  -3  -9   6  597.84   46.70
   3  -9  -6  702.93   47.00
  -3  -9   6  649.83   47.90
  -3   9   6  667.83   46.20
  -1  -9   6  109.49   21.70
  -1  -9   6  126.79   14.60
   1  -9  -6  144.39   17.60
  -1  -9   6  122.89   18.10
   1   9  -6  124.89   16.10
  -1   9   6  136.29   18.20
   1  -9   6  100.19   15.80
  -1  -9  -6   90.29   15.80
   1  -9   6   92.59   16.60
  -1   9  -6   76.39   13.80
   1   9   6   83.39   13.70
   3  -9   6   65.29   13.20
   3  -9   6   63.59   15.40
  -3  -9  -6   58.09   11.90
  -3   9  -6   50.29    9.10
   3   9   6   47.10   11.90
   5  -9   6  222.88   20.40
   5  -9   6  296.47   29.70
  -5  -9  -6  243.38   24.20
   5   9   6  217.48   24.50
   5   9   6  206.88   28.70
  -7  -9  -6  116.39   17.50
   7  -9   6   71.89   15.80
   7   9   6   77.59   14.40
   9  -9   6  134.19   25.80
  -9  -9  -6  165.28   20.00
   9   9   6  127.49   21.90
  11  -9   6  127.69   23.50
 -11  -9  -6  136.39   19.20
  11   9   6  136.69   22.60
 -13  -9  -6   51.69   11.30
  13  -9   6   70.79   21.20
  13   9   6   71.39   14.90
  13   9   6   38.40   16.70
 -15  -9  -6  151.08   19.00
  15   9   6  178.78   25.20
  15   9   6  159.18   28.90
 -15   9  -6  130.19   17.00
  17  -9   6  234.48   38.00
  17   9   6  230.58   29.90
  17   9   6  248.68   33.40
  20 -10  -6   20.70   21.60
  20 -10  -6   28.30   12.10
  20  10  -6   39.20   14.80
  18 -10  -6   51.99   12.70
  18 -10  -6   35.50   14.60
  18  10  -6   44.20   14.50
  16 -10  -6   68.59   14.80
 -16  10   6   74.49   15.40
  16  10  -6   88.59   20.70
  14 -10  -6   15.40   10.50
  14  10  -6   22.40   11.50
 -14  10   6   35.30   11.30
  12 -10  -6    5.60    8.70
  12  10  -6   17.90   10.10
 -12  10   6    0.40    9.10
  10 -10  -6  502.15   39.40
 -10 -10   6  504.25   37.40
 -10 -10   6  514.15   35.70
 -10  10   6  446.96   38.00
  10  10  -6  489.85   39.00
  -8 -10   6  873.61   57.09
   8 -10  -6  870.91   60.99
  -8 -10   6  859.21   57.09
  -8 -10   6  977.00   65.29
   8  10  -6  940.71   60.89
  -8  10   6  802.82   59.59
  -6 -10   6 1564.84   94.29
  -6 -10   6 1530.75   96.09
   6 -10  -6 1538.55   97.39
  -6 -10   6 1469.65   94.99
   6  10  -6 1573.24   96.39
  -6  10   6 1451.75   96.09
  -4 -10   6 1423.36   81.59
   4 -10  -6 1274.17   86.09
  -4 -10   6 1459.85   83.49
  -4 -10   6 1204.08   85.09
   4  10  -6 1397.86   85.29
  -4  10   6 1240.68   85.19
  -2 -10   6  371.36   32.40
   2 -10  -6  342.37   30.90
  -2 -10   6  392.56   24.90
  -2 -10   6  286.57   35.00
  -2  10   6  347.87   30.60
   2  10  -6  363.46   29.40
   0 -10  -6   14.40    9.50
   0 -10   6   16.60   12.10
   0 -10  -6   17.70    9.80
   0 -10   6   20.60    9.70
   0  10   6   16.80   10.00
   0  10  -6   24.00   10.80
  -2 -10  -6   66.19   13.10
   2 -10   6   35.50   14.10
  -2 -10  -6   45.80   12.60
   2  10   6   53.49   12.70
  -2  10  -6   34.30    9.30
   4 -10   6   97.19   18.90
   4 -10   6  133.89   16.80
  -4 -10  -6   72.19   14.80
  -4 -10  -6  109.79   18.80
   4  10   6  117.79   19.10
  -6 -10  -6  115.69   26.50
   6 -10   6   90.69   14.10
   6 -10   6   67.29   17.00
   6  10   6  110.19   19.50
   8 -10   6    9.20   13.90
  -8 -10  -6   12.60   10.20
   8  10   6   11.70   11.10
  10 -10   6    3.50   15.80
 -10 -10  -6   26.40   11.10
  10  10   6    9.60   13.00
  10  10   6   -1.20   14.90
  12 -10   6   16.40   17.40
 -12 -10  -6    1.30    9.60
  12  10   6   30.20   16.00
  12  10   6   41.60   14.20
  14 -10   6  123.49   24.40
 -14 -10  -6  113.79   18.40
  14  10   6  150.48   24.50
  14  10   6  166.58   28.70
  19 -11  -6  -14.80   12.70
  19 -11  -6   13.80   12.20
  19  11  -6   -0.60   12.80
  17 -11  -6   72.39   16.10
  17 -11  -6   49.40   11.60
  17  11  -6   51.89   15.10
  15 -11  -6   -7.70   11.30
  15 -11  -6    3.90    9.00
  15  11  -6    1.10   12.10
 -15  11   6    9.70   11.30
  13 -11  -6   13.20   10.60
  13  11  -6    5.50   11.60
  11 -11  -6  304.67   29.10
 -11 -11   6  259.37   25.50
 -11  11   6  256.27   28.00
  11  11  -6  310.17   29.60
  -9 -11   6  588.14   47.40
  -9 -11   6  642.94   44.80
   9 -11  -6  628.34   46.30
  -9  11   6  532.55   45.10
   9  11  -6  652.43   46.40
   7 -11  -6  689.73   50.39
  -7 -11   6  672.93   47.50
  -7 -11   6  690.93   47.10
  -7 -11   6  765.22   52.69
  -7  11   6  646.54   49.40
   7  11  -6  691.23   49.80
  -5 -11   6  824.52   57.49
   5 -11  -6  852.61   59.19
  -5 -11   6  869.71   53.99
  -5  11   6  789.72   58.19
   5  11  -6  884.11   58.39
   3 -11  -6  583.14   46.70
  -3 -11   6  698.03   41.90
  -3 -11   6  610.04   46.80
   3  11  -6  710.63   46.50
  -3  11   6  557.24   45.80
  -1 -11   6   12.10   10.90
  -1 -11   6   29.40    6.70
   1 -11  -6   28.10   10.40
   1  11  -6   30.70    9.60
  -1  11   6   21.60   10.70
   1 -11   6   39.60   14.40
   1 -11   6   47.60   12.10
  -1 -11  -6   64.59   14.10
   1  11   6   34.00   11.10
   3 -11   6  192.38   23.80
  -3 -11  -6  184.08   24.10
   3 -11   6  165.08   27.90
  -3 -11  -6  207.98   24.30
   3  11   6  186.18   22.90
   5 -11   6  111.49   21.00
   5 -11   6  138.39   19.30
  -5 -11  -6  185.68   22.30
   5  11   6  184.28   22.70
   5  11   6   94.49   19.50
   7 -11   6   58.29   17.90
   7  11   6   78.39   15.30
   9 -11   6   30.20   22.00
  -9 -11  -6   50.39   18.70
   9  11   6   23.80   12.90
   9  11   6   24.10   15.00
 -11 -11  -6   43.40   12.10
  11 -11   6   75.79   22.50
  11  11   6   64.79   17.80
  11  11   6   78.99   16.40
  13 -11   6  187.48   35.30
  13  11   6  211.88   29.00
  13  11   6  218.08   32.50
  16 -12  -6   17.80   11.70
  16  12  -6   19.50   13.70
  14 -12  -6   16.40   12.10
 -14  12   6   12.80   11.90
  14  12  -6    7.50   12.00
  12 -12  -6   10.20   11.20
  12  12  -6    1.90   12.10
 -12  12   6    7.50   11.80
  10 -12  -6   65.69   14.40
  10  12  -6   68.89   14.50
 -10  12   6   71.39   15.00
  -8 -12   6   -7.10   11.30
   8 -12  -6    6.70    9.10
  -8 -12   6   13.80    9.70
   8  12  -6   25.50   10.70
   6 -12  -6    5.40    9.10
  -6 -12   6   19.30   10.00
  -6 -12   6   12.80   10.00
  -6  12   6   14.40   10.10
   6  12  -6   30.40   10.70
  -4 -12   6    3.70    9.80
   4 -12  -6    6.60    9.90
  -4 -12   6    4.80    5.40
   4  12  -6    9.80    8.80
  -4  12   6   -6.30    9.30
   2 -12  -6    1.30   10.00
  -2 -12   6   17.70   11.90
  -2 -12   6   18.00    6.00
   2  12  -6    9.80    8.70
  -2  12   6   12.10   10.30
   0 -12   6  123.89   22.60
   0 -12  -6  142.59   21.30
   0 -12   6  136.79   13.20
   0  12  -6   95.89   19.10
   0  12   6  121.49   20.40
   2 -12   6   33.80   14.60
  -2 -12  -6   37.00   13.90
   2  12   6   32.90   12.10
  -2  12  -6   22.50    9.40
  -4 -12  -6  160.38   27.60
   4 -12   6  112.49   18.90
   4 -12   6  192.78   29.20
   4  12   6  170.08   23.10
   6 -12   6   17.50   17.80
   6 -12   6    2.50   15.00
  -6 -12  -6   36.60   13.30
  -6 -12  -6   30.20   12.30
   6  12   6   44.50   13.80
  -8 -12  -6   31.70   12.10
   8 -12   6  -28.80   16.20
  -8 -12  -6    7.60   10.30
   8  12   6   14.40   12.70
   8  12   6  -15.20   13.40
  10 -12   6  -31.00   16.30
  10  12   6   -3.60   16.40
  10  12   6  -17.40   13.50
  13 -13  -6  104.59   23.50
  13 -13  -6   81.79   16.30
  13  13  -6   70.99   16.50
 -13  13   6  132.29   23.20
  11 -13  -6   19.80   14.40
 -11  13   6   31.60   12.70
  11  13  -6   25.30   13.50
   9 -13  -6   36.30   12.20
  -9  13   6   20.60   11.60
   9  13  -6   18.30   12.90
  -7 -13   6  193.58   22.60
   7 -13  -6  199.68   24.70
  -7 -13   6  183.08   18.70
  -7  13   6  142.39   23.10
   7  13  -6  194.58   25.70
  -5 -13   6  103.39   19.50
  -5 -13   6   83.29   15.00
   5 -13  -6  104.69   18.20
  -5  13   6  100.29   17.10
   5  13  -6   97.19   19.60
   3 -13  -6   69.49   16.30
  -3 -13   6  122.09   13.60
  -3 -13   6   96.39   17.50
   3  13  -6  121.49   20.30
  -3  13   6  109.49   19.80
   1 -13  -6   -5.70   12.30
  -1 -13   6   -3.50   11.10
  -1 -13   6   -1.50    5.20
  -1  13   6   15.60   11.50
   1  13  -6    6.90    8.70
  -1 -13  -6   45.70   16.10
   1 -13   6   62.79   16.60
  -1  13  -6   30.70   10.90
   1  13   6   51.89   15.30
   3 -13   6  104.59   20.40
  -3 -13  -6  113.69   20.70
   3  13   6  136.89   23.00
  -5 -13  -6  308.87   33.00
   5  13   6  286.17   31.10
  -7 -13  -6  147.99   24.80
   7 -13   6   82.09   20.30
   7  13   6   88.19   17.40
   8 -14  -6  155.28   24.20
  -8 -14   6  123.99   18.30
  -8 -14   6   93.79   15.60
  -8  14   6  141.99   22.90
   8  14  -6  139.69   24.70
  -6 -14   6  235.58   27.10
  -6 -14   6  240.68   22.90
   6 -14  -6  252.67   29.30
   6  14  -6  290.57   30.50
  -6  14   6  241.58   29.20
   4 -14  -6  190.58   25.00
  -4 -14   6  144.09   24.70
  -4 -14   6  177.58   18.70
   4  14  -6  206.78   27.10
  -4  14   6  221.18   25.70
  -2 -14   6   53.39    9.40
  -2 -14   6   38.60   15.80
   2 -14  -6   24.00   13.10
  -2  14   6   54.19   14.30
   2  14  -6   62.59   14.50
   0 -14   6   -4.10   12.80
   0 -14   6   -1.70    6.40
   0  14   6   16.30   12.40
   0  14  -6    6.30   10.70
  -2 -14  -6   55.29   16.10
   2 -14   6   55.69   18.60
   2  14   6   57.89   15.70
  28   0  -7   11.00   16.70
  28   0  -7   10.10   12.20
  28   0  -7    1.50   13.20
  26   0  -7   48.20   13.70
  26   0  -7   28.90   13.80
  26   0  -7   55.29   13.70
  26   0  -7   36.10   11.20
  24   0  -7   73.29   13.30
  24   0  -7   51.79   10.80
  22   0  -7   63.39   10.40
  22   0  -7   70.79   12.90
  22   0  -7   60.19   12.50
  20   0  -7    6.30    6.30
  20   0  -7   -1.80    7.70
  18   0  -7   71.99   12.00
  18   0  -7   79.99   10.40
 -16   0   7   39.60    8.70
  16   0  -7   55.09    9.40
  16   0  -7   54.69    7.90
  14   0  -7   70.79   11.00
  14   0  -7   83.89   12.00
  12   0  -7    4.00    3.70
 -12   0   7    1.70    4.60
  12   0  -7    2.50    4.60
 -12   0   7    4.30    3.20
 -10   0   7  383.86   26.30
  10   0  -7  426.06   28.70
  10   0  -7  422.56   28.90
 -10   0   7  422.56   28.70
   8   0  -7   59.69    8.40
  -8   0   7   47.50    7.10
   8   0  -7   48.90    8.50
  -8   0   7   55.99    7.70
   6   0  -7  138.39   13.40
  -6   0   7  134.19   12.30
   6   0  -7  147.19   12.40
  -6   0   7  155.78   12.40
   4   0  -7  155.88   12.40
  -4   0   7  152.18   14.20
   4   0  -7  162.88   14.10
  -4   0   7  159.08   12.20
   2   0  -7   43.40    7.20
  -2   0   7   49.70    7.90
   2   0  -7   43.60    5.90
  -2   0   7   41.40    6.10
   0   0   7  215.88   17.50
   0   0  -7  200.38   14.50
   0   0  -7  191.18   16.60
  -2   0  -7   83.89   11.50
   2   0   7   93.19   12.10
   4   0   7  267.37   22.90
  -4   0  -7  276.87   19.40
  -4   0  -7  292.57   22.30
  -6   0  -7    2.00    3.70
   6   0   7    4.50    6.30
  -6   0  -7    0.60    5.20
  -8   0  -7  173.88   18.20
   8   0   7  123.69   17.90
  10   0   7  335.57   29.10
 -10   0  -7  330.77   23.00
 -10   0  -7  312.77   26.90
 -12   0  -7  315.17   25.10
  12   0   7  326.57   29.30
  14   0   7  201.48   24.60
  14   0   7  167.28   17.60
  16   0   7   35.40    9.10
  16   0   7   38.90   14.30
  18   0   7    4.20   12.80
  18   0   7  -12.00    7.90
  20   0   7  108.39   19.10
  20   0   7   85.79   15.50
  22   0   7  208.58   21.10
  29  -1  -7   -4.20   12.30
  29  -1  -7    4.70   14.00
  29  -1  -7   -4.30   15.40
  29   1  -7   21.10   14.50
  29   1  -7   -5.10   11.80
  27  -1  -7   -2.90   12.70
  27  -1  -7    8.70   11.20
  27  -1  -7   17.10   11.90
  27  -1  -7   12.50   11.70
  27   1  -7   -3.80   12.90
  27   1  -7    0.50    9.00
  27   1  -7   10.80   11.60
  25  -1  -7  192.28   24.10
  25  -1  -7  218.38   25.70
  25  -1  -7  190.18   22.00
  25   1  -7  184.98   22.00
  25   1  -7  150.78   17.20
  25   1  -7  156.38   26.30
  25   1  -7  184.98   26.60
  23  -1  -7  471.95   35.10
  23  -1  -7  454.25   36.20
  23  -1  -7  403.36   32.80
  23   1  -7  358.26   36.70
  23   1  -7  528.75   36.40
  23   1  -7  415.16   35.00
  23   1  -7  479.85   31.10
  21  -1  -7  276.67   27.10
  21  -1  -7  255.67   24.10
  21   1  -7  310.27   24.10
  21   1  -7  296.87   26.50
  21   1  -7  333.17   22.10
  19  -1  -7  195.48   21.10
  19  -1  -7  187.58   18.40
  19   1  -7  170.08   19.50
  19   1  -7  229.68   19.20
  17  -1  -7   15.20    6.10
  17  -1  -7    9.30    7.70
  17   1  -7   11.40    4.30
  17   1  -7    9.40    5.90
 -15  -1   7  590.54   40.00
  15  -1  -7  559.94   40.70
  15  -1  -7  634.54   37.80
 -15   1   7  529.25   40.00
  15   1  -7  563.24   35.40
 -13  -1   7 1325.47   81.99
  13  -1  -7 1317.77   79.89
  13  -1  -7 1317.37   81.89
 -13   1   7 1326.07   79.09
  13   1  -7 1326.67   81.39
 -13   1   7 1297.97   82.19
  11  -1  -7 2633.84  161.58
  11  -1  -7 2766.02  163.48
 -11  -1   7 2855.71  163.38
 -11   1   7 2738.53  163.58
  11   1  -7 2677.73  162.68
  11   1  -7 2909.31  162.78
 -11   1   7 2587.14  161.08
   9  -1  -7  986.30   62.09
   9  -1  -7  987.00   63.09
  -9  -1   7 1109.69   60.89
  -9  -1   7 1060.29   63.39
  -9   1   7  981.80   61.79
   9   1  -7  943.11   62.49
   9   1  -7 1080.09   63.19
  -9   1   7  990.60   63.29
  -7  -1   7  472.05   30.80
   7  -1  -7  439.16   31.10
   7  -1  -7  436.26   30.40
  -7  -1   7  486.55   30.30
   7   1  -7  466.25   30.70
  -7   1   7  451.55   30.40
  -7   1   7  477.05   29.90
   7   1  -7  430.16   29.70
   5  -1  -7   87.59    9.20
  -5  -1   7   77.59   10.50
   5  -1  -7   74.69   10.00
  -5  -1   7   89.29    9.20
  -5   1   7   91.09    8.80
  -5   1   7   88.59   10.10
   5   1  -7   83.49   10.20
   5   1  -7   84.29    8.10
  -3  -1   7   57.39    9.40
   3  -1  -7   66.39    9.30
  -3  -1   7   60.79    6.00
   3  -1  -7   50.29    7.10
   3   1  -7   52.59    9.00
  -3   1   7   57.79    6.70
   3   1  -7   56.99    6.30
  -3   1   7   51.09    8.90
   1  -1  -7 1427.16   87.89
   1  -1  -7 1450.75   86.39
  -1  -1   7 1390.66   87.89
   1   1  -7 1474.05   87.79
  -1   1   7 1525.85   88.29
   1   1  -7 1361.16   85.09
   1  -1   7 1655.73  102.19
  -1  -1  -7 1742.13  100.49
  -1  -1  -7 1637.84  101.89
   1   1   7 1704.63  102.19
  -1   1  -7 1715.83  101.99
  -1   1  -7 1609.44   99.09
   3  -1   7  419.16   29.10
  -3  -1  -7  408.56   27.90
  -3  -1  -7  359.26   25.60
  -3   1  -7  339.97   27.30
   3   1   7  373.46   28.10
  -3   1  -7  380.16   24.30
  -5  -1  -7  123.39   11.90
  -5  -1  -7  137.29   14.40
   5  -1   7  116.59   15.60
  -5   1  -7  127.79   14.10
   5   1   7  137.39   15.30
  -7  -1  -7   15.20    6.40
   7  -1   7    9.70    7.80
  -7  -1  -7   17.60    4.90
   7   1   7   17.70    7.70
  -9  -1  -7  336.27   23.70
  -9  -1  -7  284.57   34.40
   9  -1   7  342.97   29.30
  -9   1  -7  326.97   26.30
  -9   1  -7  314.97   23.20
   9   1   7  305.87   27.10
 -11  -1  -7  417.46   30.70
 -11  -1  -7  385.16   32.90
  11  -1   7  477.45   36.10
 -11   1  -7  475.35   31.20
  11   1   7  437.66   34.90
  11   1   7  451.05   31.60
  13  -1   7  660.33   49.40
  13   1   7  665.23   45.50
 -13   1  -7  705.53   45.60
  13   1   7  642.44   48.60
  15  -1   7  176.98   26.10
  15   1   7  192.98   24.40
  15   1   7  166.68   19.50
  17  -1   7   77.09   16.80
  17   1   7   59.29   12.10
  17   1   7   84.19   16.40
  19  -1   7   60.79   17.60
  19   1   7   43.80   12.00
  19   1   7   51.19   15.10
  21   1   7   91.99   18.60
  21   1   7   59.09   16.60
  28  -2  -7   -2.40   11.10
  28  -2  -7    8.10   12.10
  28   2  -7    1.00   12.90
  28   2  -7   -7.10    9.80
  26  -2  -7   86.79   15.90
  26  -2  -7   57.29   14.30
  26   2  -7   54.99   14.50
  26   2  -7   34.60   15.10
  24  -2  -7  241.08   27.10
  24  -2  -7  292.57   27.30
  24  -2  -7  274.67   25.60
  24   2  -7  305.77   24.10
  24   2  -7  247.98   30.10
  22  -2  -7  427.36   35.50
  22  -2  -7  411.56   35.20
  22  -2  -7  490.75   35.00
  22   2  -7  421.36   37.60
  22   2  -7  453.65   31.70
  22   2  -7  443.66   35.00
  20  -2  -7  320.77   28.20
  20  -2  -7  359.46   30.60
  20   2  -7  373.06   29.40
  20   2  -7  377.56   32.20
  18  -2  -7   24.50    9.20
  18  -2  -7   27.20    8.40
  18   2  -7   25.20    8.40
 -16  -2   7  248.08   22.50
  16  -2  -7  260.27   21.20
  16  -2  -7  266.07   23.70
 -16   2   7  259.07   24.00
  16   2  -7  278.17   22.00
  14  -2  -7  641.04   55.49
  14  -2  -7  810.52   49.60
 -14   2   7  808.62   48.60
 -14   2   7  762.42   51.19
  14   2  -7  747.73   49.90
  14   2  -7  825.72   49.10
  12  -2  -7 2788.22  163.38
 -12  -2   7 2738.53  164.48
  12  -2  -7 2667.93  164.68
  12   2  -7 2732.03  162.98
 -12   2   7 2784.62  164.88
 -12   2   7 2825.82  162.68
  12   2  -7 2716.63  163.48
  10  -2  -7 2269.37  139.09
 -10  -2   7 2268.67  138.59
  10  -2  -7 2323.57  138.19
 -10   2   7 2317.07  139.19
  10   2  -7 2221.08  137.79
  10   2  -7 2303.37  137.99
 -10   2   7 2531.15  137.89
   8  -2  -7  808.22   50.89
  -8  -2   7  790.82   50.69
  -8  -2   7  803.12   50.59
   8  -2  -7  798.22   51.49
   8   2  -7  804.82   50.69
   8   2  -7  781.82   50.19
  -8   2   7  852.41   50.69
  -8   2   7  849.32   51.49
   6  -2  -7   59.79    7.90
   6  -2  -7   63.79    9.30
  -6  -2   7   51.09    6.90
  -6  -2   7   51.59    8.40
   6   2  -7   48.30    6.80
  -6   2   7   62.49    7.50
  -6   2   7   57.69    8.60
   6   2  -7   58.59    8.60
   4  -2  -7  682.83   44.40
  -4  -2   7  610.54   43.50
  -4  -2   7  680.73   41.80
   4  -2  -7  688.23   43.40
  -4   2   7  719.43   43.90
  -4   2   7  732.33   43.30
   4   2  -7  634.74   41.40
   4   2  -7  707.83   43.70
   2  -2  -7 1781.32  109.49
  -2  -2   7 1890.71  106.39
   2  -2  -7 1721.53  108.19
  -2  -2   7 1777.92  109.29
  -2   2   7 1795.82  109.49
   2   2  -7 1711.93  108.69
   2   2  -7 1974.10  107.29
   0  -2  -7 1468.15   93.69
   0  -2   7 1600.14   95.39
   0  -2  -7 1579.14   95.19
   0   2  -7 1585.64   94.79
   0   2  -7 1458.35   92.69
   0   2   7 1656.33   95.49
   2  -2   7  206.48   19.10
  -2  -2  -7  194.78   17.70
  -2  -2  -7  184.88   16.40
  -2   2  -7  196.78   17.40
  -2   2  -7  210.68   13.60
   2   2   7  199.98   18.30
   4  -2   7   31.40    8.30
  -4   2  -7   24.90    7.10
   4   2   7   39.20    8.00
   6  -2   7  326.87   27.50
  -6  -2  -7  324.77   24.70
  -6  -2  -7  362.66   26.30
  -6   2  -7  344.37   22.70
   6   2   7  347.57   26.80
  -8  -2  -7  679.53   49.10
   8  -2   7  804.12   54.09
  -8  -2  -7  755.82   50.89
  -8   2  -7  839.82   48.10
   8   2   7  772.52   50.19
   8   2   7  745.53   51.29
  -8   2  -7  771.52   51.09
 -10  -2  -7 1104.09   71.79
  10  -2   7 1089.99   71.79
 -10  -2  -7 1047.10   67.89
  10   2   7 1043.20   68.69
  10   2   7 1048.00   69.89
 -10   2  -7 1135.69   66.89
 -12  -2  -7  874.71   57.99
  12  -2   7  856.21   60.79
 -12  -2  -7  857.91   56.49
  12   2   7  864.51   58.99
 -12   2  -7  879.21   55.69
  12   2   7  860.51   57.69
  14  -2   7  825.22   56.29
 -14  -2  -7  666.53   49.50
 -14   2  -7  766.52   49.80
  14   2   7  725.13   51.39
  14   2   7  752.42   52.99
  16  -2   7  219.08   29.20
  16   2   7  238.78   26.50
  16   2   7  213.68   24.40
  18  -2   7   -0.70   13.70
  18   2   7  -15.00   11.30
  18   2   7    0.90   10.80
  20  -2   7   43.00   32.10
  20   2   7   55.39   15.80
  27  -3  -7   -5.60   13.40
  27  -3  -7    9.50   11.50
  27   3  -7   -8.60    8.50
  27   3  -7  -11.20   12.60
  25  -3  -7   -2.30   17.90
  25  -3  -7   27.30   11.60
  25   3  -7   -5.10    8.10
  25   3  -7   -1.10   11.80
  23  -3  -7   66.39   14.30
  23  -3  -7  101.29   18.20
  23   3  -7   90.59   18.30
  23   3  -7  114.59   13.30
  21  -3  -7  130.79   18.40
  21  -3  -7  135.29   20.10
  21   3  -7  144.89   14.80
  21   3  -7  143.09   22.80
  19  -3  -7   14.90    8.40
  19  -3  -7   -0.20   11.40
  19   3  -7    7.20    9.00
  19   3  -7   -0.20    5.90
  19   3  -7    5.80    7.60
  17  -3  -7   18.30    8.40
  17  -3  -7   23.00    8.20
  17   3  -7   13.20    6.00
  17   3  -7   24.70    9.20
  17   3  -7   29.50    8.40
  15  -3  -7  552.14   36.30
 -15  -3   7  543.55   36.90
  15  -3  -7  495.45   37.30
  15   3  -7  456.65   33.50
  15   3  -7  499.85   38.00
  15   3  -7  531.05   37.40
 -15   3   7  551.44   37.30
 -15   3   7  490.35   34.70
  13  -3  -7  727.13   48.90
  13  -3  -7  725.83   46.60
 -13  -3   7  678.83   46.60
  13   3  -7  682.93   44.50
 -13   3   7  682.33   45.20
 -13   3   7  708.33   47.20
  13   3  -7  745.73   46.10
  11  -3  -7 1434.46   89.59
  11  -3  -7 1423.96   90.49
 -11  -3   7 1488.35   89.89
 -11   3   7 1562.74   89.19
  11   3  -7 1474.45   88.29
 -11   3   7 1433.66   90.29
  11   3  -7 1444.96   88.89
  -9  -3   7  200.18   16.30
   9  -3  -7  228.28   17.70
   9  -3  -7  203.28   17.60
  -9  -3   7  193.68   16.10
  -9   3   7  247.48   17.10
   9   3  -7  189.88   15.80
   9   3  -7  194.68   15.80
  -9   3   7  184.58   16.60
  -7  -3   7   99.39   11.40
   7  -3  -7  113.99   11.90
  -7  -3   7  127.29   10.40
   7  -3  -7  100.29   12.30
   7   3  -7  105.29   11.30
  -7   3   7  103.89   10.70
  -7   3   7  129.59   12.00
   7   3  -7  104.09    9.70
   5  -3  -7   19.40    6.10
   5  -3  -7   19.00    5.40
  -5  -3   7   13.80    5.70
  -5  -3   7   31.40    4.60
   5  -3  -7   15.30    7.30
   5   3  -7   22.60    4.00
   5   3  -7   17.30    5.50
  -5   3   7   21.80    5.10
  -5   3   7   15.10    6.00
  -3  -3   7  371.36   22.60
  -3  -3   7  340.47   25.80
   3  -3  -7  368.06   25.30
   3  -3  -7  351.06   26.30
   3   3  -7  334.97   23.70
   3   3  -7  361.46   25.40
  -3   3   7  380.26   24.90
  -3   3   7  375.66   26.40
   1  -3  -7   23.90    5.70
  -1  -3   7   28.30    6.80
   1  -3  -7   15.60    6.00
   1  -3  -7   17.10    5.20
   1   3  -7   24.90    5.90
  -1   3   7   21.50    7.10
  -1  -3  -7  167.28   15.50
   1  -3   7  152.38   16.80
  -1  -3  -7  190.58   15.20
  -1  -3  -7  160.28   15.90
  -1   3  -7  167.48   15.60
   1   3   7  170.88   16.40
  -3  -3  -7  613.64   41.00
  -3  -3  -7  658.53   42.00
   3  -3   7  611.94   43.10
   3   3   7  611.44   42.00
  -3   3  -7  617.34   41.50
   5  -3   7  157.28   17.60
  -5  -3  -7  147.19   15.20
  -5   3  -7  133.99   11.10
   5   3   7  157.08   16.60
  -7  -3  -7  127.69   15.30
  -7  -3  -7  150.78   15.60
   7  -3   7  116.29   17.60
   7   3   7  118.59   15.70
   7   3   7   97.29   15.30
  -7   3  -7  112.99   10.70
  -7   3  -7  103.79   15.00
  -9  -3  -7  223.68   21.40
   9  -3   7  220.68   23.80
  -9  -3  -7  257.47   21.00
  -9   3  -7  218.98   17.10
   9   3   7  202.38   21.90
   9   3   7  179.88   21.40
  11  -3   7  269.17   28.60
 -11  -3  -7  291.27   24.80
 -11  -3  -7  322.47   25.50
  11   3   7  246.98   25.50
 -11   3  -7  260.67   21.40
  11   3   7  241.08   25.60
 -13  -3  -7  738.63   48.70
 -13  -3  -7  567.74   48.60
  13  -3   7  719.33   53.09
  13   3   7  761.92   52.79
  13   3   7  693.53   49.50
 -13   3  -7  685.93   46.00
 -15  -3  -7  250.27   23.80
  15  -3   7  228.88   30.20
 -15   3  -7  241.28   21.90
  15   3   7  218.38   25.70
  17  -3   7   66.99   18.80
  17   3   7   75.39   14.90
  17   3   7   63.89   14.20
  19   3   7    2.60   11.20
  19   3   7   18.00   12.70
  21  -3   7   42.70   18.30
  21   3   7   57.49   14.70
  21   3   7   64.69   15.90
  28  -4  -7    4.70   12.50
  28   4  -7    5.30   13.70
  26  -4  -7   82.29   17.90
  26  -4  -7   73.49   15.60
  26   4  -7   69.39   16.50
  24  -4  -7   85.19   15.50
  24  -4  -7   65.09   14.60
  22  -4  -7  309.87   28.50
  22  -4  -7  298.27   27.40
  22   4  -7  226.48   29.20
  20  -4  -7  165.98   21.10
  20   4  -7  122.19   22.00
  18  -4  -7  215.18   21.60
  18  -4  -7  226.18   22.90
  18   4  -7  189.48   24.30
  16  -4  -7   19.60    8.10
 -16  -4   7    9.90    7.70
  16  -4  -7    9.80    8.70
 -16   4   7    0.10    6.40
  16   4  -7    9.30    8.50
 -14  -4   7  139.09   15.20
  14  -4  -7  116.89   15.80
  14  -4  -7  142.39   16.60
 -14   4   7  103.09   14.20
 -14   4   7  151.48   16.00
  14   4  -7  154.08   18.60
  12  -4  -7   21.00    6.80
  12  -4  -7    5.90    6.90
 -12  -4   7   12.30    5.60
  12   4  -7   13.40    7.70
  12   4  -7   10.80    4.20
 -12   4   7   12.90    5.90
 -12   4   7   17.70    6.00
  10  -4  -7  896.51   60.59
  10  -4  -7  959.20   61.49
 -10  -4   7  932.11   59.79
 -10   4   7 1053.09   60.39
 -10   4   7  971.40   60.99
  10   4  -7  919.21   61.59
  -8  -4   7  176.48   16.00
   8  -4  -7  197.98   18.20
  -8  -4   7  217.78   16.00
  -8  -4   7  190.68   13.30
   8  -4  -7  203.18   17.90
  -8   4   7  238.48   17.40
   8   4  -7  206.48   18.70
  -8   4   7  227.18   17.70
   8   4  -7  189.18   15.60
   6  -4  -7  126.09   13.30
   6  -4  -7  122.89   14.30
  -6  -4   7  132.09   12.90
  -6   4   7  131.59   12.10
   6   4  -7  117.89   11.80
   6   4  -7   90.49   13.00
  -6   4   7  121.29   13.00
   4  -4  -7  316.27   23.40
  -4  -4   7  292.17   23.30
   4  -4  -7  307.37   24.00
   4  -4  -7  276.67   24.20
  -4  -4   7  323.07   20.20
  -4   4   7  347.07   24.00
  -4   4   7  335.77   22.70
   4   4  -7  287.47   22.20
   4   4  -7  306.27   22.90
  -2  -4   7  422.76   32.40
   2  -4  -7  455.55   32.60
   2  -4  -7  460.05   32.00
   2  -4  -7  474.25   32.30
  -2   4   7  463.75   32.80
   2   4  -7  450.55   31.40
   2   4  -7  504.45   30.80
   0  -4  -7 1964.80  118.49
   0  -4  -7 1918.21  118.89
   0  -4   7 1932.91  119.39
   0  -4  -7 1919.01  118.39
   0   4   7 1974.00  119.09
   0   4  -7 1958.20  117.99
   0   4  -7 2043.50  116.09
  -2  -4  -7 1287.57   84.09
  -2  -4  -7 1316.87   83.79
   2  -4   7 1328.17   85.29
  -2   4  -7 1371.56   83.89
   2   4   7 1427.86   84.69
   2   4   7 1429.56   85.19
   4  -4   7  709.33   47.60
  -4  -4  -7  666.43   45.30
  -4  -4  -7  650.03   45.50
   4   4   7  715.43   46.10
  -6  -4  -7  111.99   14.70
  -6  -4  -7  112.89   14.90
   6  -4   7  125.39   17.90
  -6   4  -7  120.19   14.30
   6   4   7  112.99   15.70
   6   4   7  113.49   16.30
  -8  -4  -7   26.20   10.20
  -8  -4  -7   38.20    8.90
   8  -4   7   32.20   11.00
   8   4   7   33.30    9.10
  -8   4  -7   38.00    5.90
   8   4   7   17.80    8.90
 -10  -4  -7  193.78   24.20
  10  -4   7  241.48   26.50
 -10   4  -7  211.58   17.70
  10   4   7  257.67   22.90
 -12  -4  -7  180.18   20.30
 -12  -4  -7  162.48   21.70
  12  -4   7  207.68   27.30
  12   4   7  165.68   23.30
 -12   4  -7  186.58   17.20
  14  -4   7  189.98   27.80
 -14  -4  -7  113.09   19.00
  14   4   7  158.78   22.50
 -14   4  -7  130.69   16.30
  14   4   7  169.98   21.60
  16  -4   7   -1.40   14.40
 -16   4  -7   -7.20    9.60
  16   4   7    3.90   10.60
  16   4   7    1.20   11.30
  18  -4   7  149.79   36.40
  18   4   7  113.49   22.60
  18   4   7  106.79   17.50
  20  -4   7  118.59   23.00
  20   4   7  130.29   22.60
  20   4   7   90.19   17.80
  27  -5  -7   49.30   18.40
  27  -5  -7   46.20   15.10
  27   5  -7   57.69   16.40
  25  -5  -7  290.37   32.50
  25  -5  -7  413.16   41.00
  25   5  -7  331.57   35.40
  23  -5  -7  589.14   46.80
  23  -5  -7  647.84   46.80
  23   5  -7  588.34   49.00
  21  -5  -7  674.83   51.49
  21   5  -7  732.83   53.39
  19  -5  -7  281.57   28.30
  19   5  -7  298.87   30.10
  17  -5  -7    8.40    8.70
  17  -5  -7   13.30    9.40
 -17   5   7   10.80    7.70
  17   5  -7   -0.10    8.20
 -15  -5   7  122.39   16.00
  15  -5  -7  142.49   17.20
  15  -5  -7  102.19   16.20
  15   5  -7  104.79   18.10
 -15   5   7  111.69   15.50
  13  -5  -7  801.82   48.50
 -13  -5   7  743.53   55.89
  13  -5  -7  689.93   47.10
 -13   5   7  693.93   46.70
 -13   5   7  584.74   48.70
  13   5  -7  635.74   47.90
  11  -5  -7 1421.86   82.09
 -11  -5   7 1148.49   75.59
  11  -5  -7 1421.96   86.49
  11   5  -7 1156.98   72.69
 -11   5   7 1089.09   75.99
 -11   5   7 1160.98   75.79
   9  -5  -7 2422.56  145.49
  -9  -5   7 2261.87  142.29
  -9  -5   7 2484.75  143.39
   9  -5  -7 2356.56  145.19
  -9  -5   7 2406.26  140.49
   9   5  -7 2492.05  142.99
  -9   5   7 2440.56  146.99
  -9   5   7 2390.96  144.19
   9   5  -7 2364.56  145.09
  -7  -5   7    3.70    3.10
   7  -5  -7    1.50    5.80
   7  -5  -7    4.90    5.00
  -7  -5   7    5.80    4.40
  -7  -5   7    4.30    3.50
   7   5  -7   -1.80    4.90
  -7   5   7    1.00    3.00
  -7   5   7   -0.20    4.40
   7   5  -7    4.70    4.10
   5  -5  -7    2.10    5.00
  -5  -5   7    1.90    3.50
  -5  -5   7   -3.90    4.90
   5  -5  -7    0.50    6.40
  -5  -5   7    3.40    3.30
  -5   5   7    6.80    3.70
   5   5  -7   -1.30    4.00
  -5   5   7   -3.20    5.60
   5   5  -7    1.90    5.20
   3  -5  -7 2002.70  125.79
   3  -5  -7 2015.00  125.29
   3  -5  -7 1993.90  125.79
  -3  -5   7 2120.89  125.39
   3  -5  -7 2014.80  125.29
   3   5  -7 2104.19  123.89
   3   5  -7 2089.89  123.79
  -3   5   7 2215.48  125.69
   1  -5  -7 2952.50  179.58
   1  -5  -7 2885.71  179.38
   1  -5  -7 2895.11  179.78
  -1  -5   7 3056.29  180.18
  -1   5   7 3131.79  179.88
   1   5  -7 3070.39  177.18
   1   5  -7 3040.50  178.38
  -1  -5  -7 2054.49  129.59
   1  -5   7 2215.68  130.99
  -1  -5  -7 2198.38  129.79
  -1  -5  -7 2125.49  129.59
   1   5   7 2244.28  130.39
  -1   5  -7 2027.10  128.59
  -1   5  -7 2115.29  126.19
   3  -5   7 1424.86   90.19
  -3  -5  -7 1293.07   90.79
  -3  -5  -7 1353.46   87.99
  -3   5  -7 1462.65   89.89
   3   5   7 1560.04   89.89
   5  -5   7  405.76   33.20
  -5  -5  -7  441.86   31.90
  -5  -5  -7  391.06   30.30
   5   5   7  437.96   33.60
  -5   5  -7  386.96   29.90
   5   5   7  419.76   30.80
   5   5   7  363.66   33.00
   7  -5   7    4.10   10.10
  -7  -5  -7   18.30    7.60
  -7  -5  -7   10.20    7.50
   7   5   7   -5.80    8.70
   7   5   7    0.20    6.90
   9  -5   7  263.37   29.40
  -9  -5  -7  243.78   23.30
  -9  -5  -7  244.98   24.40
   9   5   7  234.08   26.40
   9   5   7  246.48   23.60
  -9   5  -7  255.87   18.20
  11  -5   7  277.47   31.00
 -11   5  -7  230.48   19.00
  11   5   7  253.97   24.70
  11   5   7  229.68   27.50
  13  -5   7  319.27   34.70
 -13  -5  -7  305.67   27.20
  13   5   7  287.97   31.20
 -13   5  -7  335.37   24.20
  15  -5   7   -0.70   15.00
 -15  -5  -7    2.50    9.70
  15   5   7  -11.10   11.30
 -15   5  -7  -19.30   11.70
  15   5   7    4.20    9.90
  17  -5   7   95.39   30.30
  17   5   7   67.59   14.10
 -17   5  -7   37.60   11.60
  17   5   7   33.60   14.70
  19  -5   7  121.99   25.30
  19   5   7  144.79   26.40
  19   5   7  180.08   23.00
  26  -6  -7   74.39   16.90
  26  -6  -7   70.89   17.90
  26   6  -7  100.39   19.30
  24  -6  -7   27.30   15.50
  24  -6  -7   54.49   17.20
  24   6  -7   74.09   15.70
  22  -6  -7  283.67   31.40
  22  -6  -7  360.96   31.40
  22   6  -7  344.67   34.60
  20  -6  -7  212.18   26.30
  20   6  -7  259.57   29.10
  18  -6  -7   39.00   12.80
  18   6  -7   60.99   13.60
  16  -6  -7   44.60   11.70
 -16   6   7   54.49   11.30
  16   6  -7   58.39   12.50
  14  -6  -7  253.67   23.70
 -14  -6   7  251.57   23.00
  14   6  -7  271.37   25.70
 -14   6   7  235.18   25.50
  12  -6  -7  165.08   17.60
 -12  -6   7  135.69   16.40
  12  -6  -7  147.59   18.20
 -12   6   7  181.58   20.20
 -12   6   7  125.69   16.60
  12   6  -7  148.29   19.70
  10  -6  -7  465.15   33.60
 -10  -6   7  403.16   31.20
  10  -6  -7  432.06   33.80
 -10  -6   7  483.75   28.30
 -10  -6   7  457.75   29.70
  10   6  -7  438.46   29.20
 -10   6   7  490.05   33.10
  10   6  -7  435.76   34.70
 -10   6   7  428.16   32.10
  -8  -6   7  101.29   11.50
   8  -6  -7  123.19   16.50
   8  -6  -7   83.99   14.70
  -8  -6   7  123.29   12.50
  -8  -6   7  131.29   12.30
   8   6  -7   95.49   15.30
  -8   6   7   89.69   11.90
  -8   6   7  135.99   21.40
   8   6  -7  117.79   10.40
  -6  -6   7  457.65   31.30
   6  -6  -7  414.96   33.10
  -6  -6   7  436.56   29.30
   6  -6  -7  538.35   36.40
   6  -6  -7  461.05   32.60
  -6  -6   7  395.36   28.50
  -6   6   7  449.06   35.10
   6   6  -7  450.95   29.60
  -6   6   7  470.05   31.70
   6   6  -7  439.96   32.10
   4  -6  -7  102.79   15.10
   4  -6  -7  116.69   14.10
   4  -6  -7  124.49   14.60
  -4  -6   7  117.29   14.20
  -4  -6   7  108.49   10.70
   4   6  -7  127.59   13.50
  -4   6   7  147.19   16.20
   4   6  -7  113.19   11.70
   2  -6  -7 1207.28   82.69
   2  -6  -7 1233.38   83.09
   2  -6  -7 1282.77   82.69
   2  -6  -7 1477.75   86.69
  -2  -6   7 1404.16   80.49
  -2  -6   7 1338.07   83.19
  -2   6   7 1391.66   85.39
   2   6  -7 1313.67   80.89
   2   6  -7 1271.87   80.39
   0  -6  -7  726.13   50.09
   0  -6   7  790.22   51.49
   0  -6  -7  609.64   52.49
   0  -6  -7  805.12   50.29
   0   6  -7  764.02   48.60
   0   6  -7  782.02   47.10
  -2  -6  -7  960.00   66.39
   2  -6   7 1162.88   71.19
  -2  -6  -7  959.40   66.39
  -2  -6  -7 1026.30   66.79
  -2   6  -7 1015.50   65.59
   2   6   7 1058.69   67.69
  -2   6  -7 1099.19   62.99
  -4  -6  -7  814.12   53.49
  -4  -6  -7  783.42   52.79
   4  -6   7  747.83   55.29
   4   6   7  855.51   54.29
  -4   6  -7  752.92   51.79
  -6  -6  -7    6.70    7.00
   6  -6   7  -13.10    8.90
  -6  -6  -7   17.20    8.80
   6   6   7   -1.40    8.90
   6   6   7    7.00    9.80
   8  -6   7   78.69   17.00
  -8  -6  -7  104.69   17.00
   8   6   7   58.89   13.80
   8   6   7   70.59   14.70
  10  -6   7 1044.90   75.79
 -10  -6  -7 1109.69   70.39
  10   6   7 1090.59   69.89
 -10   6  -7 1139.79   65.49
  10   6   7 1000.80   73.79
  10   6   7 1054.79   71.99
 -12  -6  -7   66.99   14.20
  12  -6   7   58.59   16.70
 -12   6  -7   60.59   10.90
  12   6   7   58.09   16.10
  12   6   7   46.00   10.60
  12   6   7   29.40   13.30
  14  -6   7  196.08   30.80
 -14  -6  -7  178.58   22.00
  14   6   7  197.68   28.30
 -14   6  -7  180.08   18.20
  16  -6   7    3.10   16.50
  16   6   7   -9.80   12.70
 -16   6  -7    0.80   13.40
  16   6   7   19.80   11.10
  18  -6   7   56.19   20.70
  18   6   7   31.40   15.40
  18   6   7   54.69   12.80
  25  -7  -7   24.20   12.80
  25  -7  -7    8.50   13.00
  25   7  -7   11.50   13.20
  23  -7  -7   31.00   12.40
  23  -7  -7   31.80   24.10
  23   7  -7   23.30   13.00
  21  -7  -7   15.50   12.00
  21  -7  -7   26.10   11.30
  21   7  -7    8.20   12.20
  19  -7  -7   22.70   10.70
  19   7  -7   22.70   11.80
  17  -7  -7   41.50   12.10
  17   7  -7   43.80   12.40
 -17   7   7   25.80   10.50
  15  -7  -7   23.40   10.70
  15   7  -7   23.80   10.20
 -15   7   7   23.80    9.90
  13  -7  -7  302.77   26.30
 -13  -7   7  296.57   25.00
 -13   7   7  226.88   24.10
  13   7  -7  291.67   27.60
 -11  -7   7   35.50    6.10
 -11  -7   7   57.09    9.80
  11  -7  -7   42.40    9.00
  11   7  -7   42.50   10.70
 -11   7   7   35.10    8.80
  -9  -7   7   -5.70    5.20
  -9  -7   7   10.30    4.30
   9  -7  -7    4.30    5.80
  -9  -7   7    7.10    4.90
  -9   7   7    2.80    5.30
  -9   7   7   -1.00    6.00
   9   7  -7   -0.60    6.70
   9   7  -7    7.50    3.40
  -7  -7   7   19.10    6.20
  -7  -7   7   -4.60    4.30
  -7  -7   7    8.50    4.40
   7  -7  -7    5.60    7.00
   7  -7  -7    5.60    5.20
   7  -7  -7    5.70    5.60
   7   7  -7    8.90    4.00
   7   7  -7    1.50    6.50
  -7   7   7    2.80    4.60
  -7   7   7    4.40    6.20
  -5  -7   7   40.70    7.50
  -5  -7   7   42.00    8.70
  -5  -7   7   38.10    6.00
   5  -7  -7   50.39    9.40
   5  -7  -7   35.00    9.50
   5  -7  -7   58.69   11.40
   5   7  -7   28.80    8.00
   5   7  -7   55.99    8.00
  -5   7   7   32.80    8.50
  -3  -7   7   14.90    7.40
   3  -7  -7   15.80    6.70
  -3  -7   7   12.40    4.70
   3  -7  -7   15.60    8.60
   3  -7  -7    4.40    6.80
   3   7  -7   14.10    4.80
  -3   7   7   17.90    6.90
   3   7  -7   11.00    5.60
  -1  -7   7   54.69   11.60
   1  -7  -7   32.50    8.90
   1  -7  -7   46.40    9.00
  -1  -7   7   62.39    9.20
   1   7  -7   52.09    8.40
  -1   7   7   43.70    9.40
   1   7  -7   57.99   10.00
  -1  -7  -7   15.90    8.30
   1  -7   7   21.90    6.70
  -1  -7  -7    7.30    7.00
  -1   7  -7   15.10    6.00
  -1   7  -7   24.80    5.40
   1   7   7   21.80    8.60
  -3  -7  -7   43.80    9.80
   3  -7   7   73.09   12.30
   3  -7   7   40.70   12.40
  -3   7  -7   61.59    9.20
   3   7   7   57.09   12.00
  -3   7  -7   38.10    8.50
  -5  -7  -7   70.29   11.50
   5  -7   7   46.40   13.70
   5   7   7   45.40   13.30
   5   7   7   70.79   13.60
   7  -7   7  602.64   47.90
  -7  -7  -7  605.64   42.30
   7   7   7  605.14   44.50
   7   7   7  525.15   46.10
  -9  -7  -7  341.57   28.50
   9  -7   7  305.07   34.20
   9   7   7  283.37   29.90
  11  -7   7  325.67   36.10
  11   7   7  286.47   33.40
  11   7   7  296.17   31.10
 -13  -7  -7  145.89   21.00
  13  -7   7  231.38   31.90
  13   7   7  208.88   25.70
  13   7   7  194.78   28.90
 -13   7  -7  155.58   15.80
  15  -7   7   84.89   21.00
  15   7   7   72.49   17.40
 -15   7  -7  107.19   15.10
  15   7   7   98.59   18.10
  17  -7   7    8.60   17.90
  17   7   7   23.40   15.00
 -17   7  -7    0.10   10.40
  17   7   7   13.30   15.10
  24  -8  -7  298.87   30.20
  24  -8  -7  244.08   31.00
  24   8  -7  236.78   32.70
  22  -8  -7  314.57   30.30
  22   8  -7  245.38   32.20
  20  -8  -7  311.47   32.70
  20   8  -7  395.86   48.30
  18  -8  -7   53.79   12.90
  18   8  -7   46.00   13.10
  16  -8  -7   42.30   12.50
 -16   8   7   49.40   11.90
  16   8  -7   78.49   14.40
  14  -8  -7  838.42   59.69
  14   8  -7  856.61   60.09
 -14   8   7  855.31   58.29
  12  -8  -7 1938.61  119.79
 -12  -8   7 1913.21  117.69
 -12   8   7 1889.01  118.19
  12   8  -7 1885.81  118.99
 -10  -8   7  165.78   18.30
  10  -8  -7  178.48   20.10
 -10  -8   7  195.38   15.90
  10   8  -7  162.68   21.40
 -10   8   7  173.28   19.10
  -8  -8   7  283.97   21.20
   8  -8  -7  253.37   23.70
  -8  -8   7  251.77   21.40
  -8  -8   7  231.08   19.00
  -8   8   7  285.47   24.00
   8   8  -7  245.98   23.70
   6  -8  -7   10.40    6.40
  -6  -8   7    1.50    4.50
  -6  -8   7    4.90    4.60
  -6  -8   7   -3.10    6.50
  -6   8   7   -0.70    6.30
   6   8  -7    8.00    4.00
   6   8  -7    6.30    7.80
   4  -8  -7  213.18   20.80
  -4  -8   7  212.78   17.60
  -4  -8   7  225.28   17.30
  -4  -8   7  185.28   21.20
   4   8  -7  216.98   20.20
  -4   8   7  211.68   20.80
   4   8  -7  223.38   17.10
   2  -8  -7  313.87   25.90
  -2  -8   7  283.97   27.00
   2  -8  -7  298.07   25.90
   2   8  -7  299.77   24.30
   2   8  -7  291.17   23.50
  -2   8   7  301.57   25.40
   0  -8  -7  669.53   46.90
   0  -8   7  629.34   43.40
   0  -8   7  763.72   51.39
   0  -8  -7  638.24   46.00
   0   8  -7  650.03   43.60
   0   8   7  662.53   46.30
   0   8  -7  638.94   43.10
  -2  -8  -7  348.77   28.40
   2  -8   7  325.47   31.20
  -2  -8  -7  305.77   30.30
  -2   8  -7  333.57   24.20
   2   8   7  314.97   28.70
   4  -8   7   48.00   13.70
   4   8   7   26.20   11.20
  -6  -8  -7   12.90   12.00
   6  -8   7   18.10   12.60
   6   8   7   18.00   11.60
   6   8   7   10.20   12.90
   8  -8   7  135.89   25.90
  -8  -8  -7  140.79   25.20
   8   8   7  147.09   22.20
  10  -8   7  374.26   37.40
  10   8   7  292.07   34.60
  10   8   7  307.07   31.30
  12  -8   7  823.62   64.89
  12   8   7  841.62   63.29
  12   8   7  791.92   58.89
  14  -8   7  216.18   33.90
 -14   8  -7  174.98   17.00
  14   8   7  194.88   30.50
  14   8   7  186.78   25.90
  16  -8   7    7.00   17.80
 -16  -8  -7  -16.40   10.70
  16   8   7   25.00   18.70
 -16   8  -7   23.80   10.20
  16   8   7   19.70   15.00
  23  -9  -7  197.78   26.10
  23  -9  -7  156.78   26.70
  23   9  -7  201.68   31.20
  21  -9  -7  263.87   27.80
  21  -9  -7  230.08   37.50
  21   9  -7  246.68   32.80
  19  -9  -7  174.68   25.00
  19   9  -7  155.78   26.50
  17  -9  -7   -1.40   10.00
 -17   9   7   -5.10    9.00
  17   9  -7    4.40   11.80
  15  -9  -7   25.10   10.80
 -15   9   7   29.30   10.40
  15   9  -7   22.50   11.60
  13  -9  -7  719.93   53.19
 -13   9   7  739.93   51.89
  13   9  -7  737.23   53.49
  11  -9  -7  905.61   63.39
 -11  -9   7  836.02   57.79
 -11  -9   7  983.40   61.59
  11   9  -7  995.10   63.49
 -11   9   7  890.61   61.79
  -9  -9   7  929.41   57.69
  -9  -9   7  941.41   59.89
  -9  -9   7  903.11   58.09
   9  -9  -7  895.01   62.29
   9   9  -7  961.30   62.09
  -9   9   7  846.42   60.99
  -7  -9   7   92.19   13.10
  -7  -9   7   86.59   16.40
   7  -9  -7   95.39   15.90
  -7  -9   7  119.59   13.30
   7   9  -7  105.09   17.80
  -7   9   7   65.29   13.20
  -5  -9   7   24.90    6.70
   5  -9  -7   30.90    9.30
  -5  -9   7   27.30   10.10
   5   9  -7   31.00    8.80
  -5   9   7   19.60    8.90
   3  -9  -7  235.88   22.60
  -3  -9   7  175.78   23.70
  -3  -9   7  187.58   17.90
   3   9  -7  232.98   24.60
  -3   9   7  234.18   22.60
  -1  -9   7  577.74   37.30
   1  -9  -7  533.05   40.30
   1  -9  -7  494.65   40.10
  -1  -9   7  469.55   41.60
   1   9  -7  543.35   36.50
  -1   9   7  541.25   40.10
   1   9  -7  568.94   37.70
  -1  -9  -7  285.27   27.30
  -1  -9  -7  296.27   27.90
   1  -9   7  289.47   30.60
  -1   9  -7  329.27   24.60
   1   9   7  273.07   27.30
  -3  -9  -7  269.17   28.10
  -3  -9  -7  281.27   27.50
   3  -9   7  316.47   32.30
  -3   9  -7  344.27   24.70
   3   9   7  301.57   29.00
  -5  -9  -7   29.10   10.60
   5  -9   7    4.00   12.00
   5   9   7   10.90   10.70
  -7  -9  -7   30.90   11.60
   7  -9   7   21.50   14.00
   7   9   7    2.00   12.60
   7   9   7   19.90   11.20
  -9  -9  -7   61.09   16.70
   9  -9   7   88.69   18.70
   9   9   7   95.79   16.70
  11  -9   7  320.27   48.60
  11   9   7  237.08   28.80
  11   9   7  182.98   31.10
  13  -9   7  247.78   35.90
  13   9   7  237.58   40.20
  13   9   7  236.28   28.60
  15  -9   7  199.28   37.70
  15   9   7  206.88   28.20
  15   9   7  206.38   32.60
  20 -10  -7   45.50   15.70
  20 -10  -7  123.19   20.00
  20  10  -7   78.09   17.90
  18 -10  -7  -12.80   11.60
  18  10  -7   -2.60   11.90
  16 -10  -7   -7.40    9.30
 -16  10   7    1.40   10.20
  16  10  -7   -9.20   15.70
  14 -10  -7   -9.40    8.70
 -14  10   7    8.30    9.30
  14  10  -7   -9.80    9.50
 -12 -10   7   14.30    8.20
  12 -10  -7   15.90    9.80
  12  10  -7   29.50   11.50
 -12  10   7   18.00   10.20
 -10 -10   7   46.00   10.80
  10 -10  -7   34.00   11.90
 -10 -10   7   45.70   10.10
 -10  10   7   66.89   13.10
   8 -10  -7   16.30    9.40
  -8 -10   7   27.30    8.70
  -8 -10   7   27.20    9.40
   8  10  -7   37.30   10.50
  -8  10   7    9.50    9.40
  -6 -10   7   39.70    9.00
  -6 -10   7   51.69   10.30
  -6 -10   7   49.20   12.20
  -6  10   7   42.10   11.90
   6  10  -7   51.99   11.10
  -4 -10   7   14.90    5.10
  -4 -10   7    3.60   10.80
  -4 -10   7   18.90    6.70
   4 -10  -7   17.40    9.20
  -4 -10   7   24.90    8.40
  -4  10   7   13.30    9.60
   4  10  -7   29.70    9.10
   2 -10  -7   43.00   11.60
  -2 -10   7   33.80   13.30
   2  10  -7   42.50    9.60
  -2  10   7   39.40   11.50
   0 -10   7  122.69   19.50
   0 -10  -7  119.19   19.50
   0  10  -7  167.18   17.90
   0  10   7  122.49   19.80
   2 -10   7   25.30   13.20
  -2 -10  -7   20.50   12.50
  -2 -10  -7    3.70    9.10
  -2  10  -7   40.30    9.00
   2  10   7   30.00   11.20
   4 -10   7   55.29   15.80
  -4 -10  -7   96.19   15.20
   4  10   7  105.69   19.10
  -6 -10  -7   14.90   11.20
   6 -10   7   11.00   14.50
   6  10   7   14.60   11.00
   8 -10   7   54.69   19.00
  -8 -10  -7   45.50   12.10
   8  10   7   19.80   14.30
   8  10   7   58.69   14.70
 -10 -10  -7   64.49   14.20
  10  10   7   41.60   14.50
 -12 -10  -7   72.59   21.70
  12 -10   7   51.89   19.60
  12  10   7   51.29   18.20
  14 -10   7    1.40   17.70
  14  10   7   22.10   16.40
  19 -11  -7   20.20   14.40
  19 -11  -7   39.20   12.40
  19  11  -7   22.10   13.50
  17 -11  -7   36.90   10.80
  17 -11  -7   49.60   22.50
 -17  11   7   17.10   12.80
  17  11  -7   35.30   14.70
  15 -11  -7  150.18   24.30
 -15  11   7  135.79   21.70
  15  11  -7  138.89   25.00
  13 -11  -7  461.05   37.70
 -13  11   7  350.56   38.80
  13  11  -7  424.96   37.60
  11 -11  -7  219.58   25.10
 -11 -11   7  199.28   21.50
  11  11  -7  248.08   26.30
 -11  11   7  177.78   24.10
  -9 -11   7  209.98   19.80
  -9 -11   7  172.18   20.40
   9 -11  -7  203.18   23.20
  -9  11   7  132.19   21.60
   9  11  -7  201.78   23.80
  -7 -11   7   11.70    8.60
  -7 -11   7   10.40    9.50
   7 -11  -7   12.40    8.90
  -7 -11   7   22.00    9.10
   7  11  -7   18.90    9.30
  -7  11   7   -7.50    8.80
   5 -11  -7   -0.40    7.70
  -5 -11   7   -7.50    6.80
  -5 -11   7    6.90   11.10
  -5 -11   7    3.40    4.80
  -5  11   7    1.30    9.80
   5  11  -7    7.00    8.70
  -3 -11   7   49.60   12.70
   3 -11  -7   31.20   11.60
  -3 -11   7   27.50    5.90
   3  11  -7   36.70    9.60
  -3  11   7   21.90   11.10
  -1 -11   7  119.39   18.70
   1 -11  -7  118.39   20.30
  -1  11   7   86.99   16.40
   1  11  -7  121.09   18.10
   1 -11   7  113.59   19.70
  -1 -11  -7   88.59   16.20
   1  11   7   89.99   15.90
  -1  11  -7   93.59   16.80
   3 -11   7    6.00   14.20
  -3 -11  -7   -3.50    9.50
   3  11   7   12.00   11.30
   5 -11   7  -22.80   11.70
  -5 -11  -7  -10.30    9.70
   5  11   7   -2.30   10.20
  -7 -11  -7   22.80   12.10
   7 -11   7    4.20   18.00
  -7 -11  -7   23.90   11.90
   7  11   7   18.30   12.50
   9 -11   7   98.39   25.50
   9  11   7  119.99   22.10
   9  11   7   93.59   17.60
 -11 -11  -7  177.48   25.10
  11 -11   7  243.18   39.10
  11  11   7  211.38   35.00
  11  11   7  240.08   33.90
  16 -12  -7   46.20   15.60
  16 -12  -7   57.19   13.50
  16  12  -7   69.99   16.20
 -16  12   7   53.99   15.10
  14 -12  -7  262.07   41.00
 -14  12   7  170.38   25.30
  14  12  -7  207.48   28.20
 -12 -12   7  439.56   41.00
  12 -12  -7  443.66   39.00
 -12  12   7  410.46   37.50
  12  12  -7  415.76   41.70
  10 -12  -7  404.76   35.90
 -10 -12   7  343.37   31.60
 -10  12   7  359.46   33.60
  10  12  -7  416.76   35.70
  -8 -12   7  195.68   22.50
   8 -12  -7  231.08   25.50
  -8 -12   7  173.48   21.80
   8  12  -7  237.18   25.80
  -8  12   7  217.48   25.20
   6 -12  -7    8.80   10.10
  -6 -12   7   -0.30   18.00
  -6 -12   7   -7.00    8.50
  -6 -12   7   12.80    5.80
  -6  12   7    5.40   13.80
   6  12  -7    1.20    9.50
  -4 -12   7   47.50   13.30
   4 -12  -7   46.20   13.30
  -4 -12   7   71.59   10.30
  -4  12   7   43.70   13.00
   4  12  -7   60.59   12.30
  -2 -12   7  173.88   25.40
   2 -12  -7  192.08   24.50
  -2  12   7  170.68   23.40
   2  12  -7  192.38   22.10
   0 -12  -7  146.19   22.70
   0 -12   7  133.89   25.10
   0  12   7  157.48   22.50
   0  12  -7  149.79   20.60
  -2 -12  -7  116.69   28.50
   2 -12   7  144.49   27.30
   2  12   7  165.38   23.20
  -2  12  -7  162.68   20.30
   4 -12   7    6.40   16.50
  -4 -12  -7   31.50   12.70
   4  12   7   39.10   14.40
  -6 -12  -7   -8.40   11.00
   6  12   7    2.80   16.50
  -8 -12  -7   58.79   16.60
  -8 -12  -7   51.09   13.60
   8  12   7   69.79   17.00
  10 -12   7   50.59   21.20
  10  12   7  162.78   24.90
  10  12   7   98.39   20.50
  13 -13  -7  195.58   28.30
 -13  13   7  180.68   25.40
  13  13  -7  220.88   28.90
  11 -13  -7  264.37   31.30
  11  13  -7  331.27   32.80
 -11  13   7  284.37   30.40
   9 -13  -7   86.09   20.60
  -9 -13   7  129.39   18.60
   9  13  -7  150.98   29.50
  -9  13   7  147.29   21.30
   7 -13  -7  148.19   35.50
  -7 -13   7  122.99   20.10
  -7 -13   7  190.78   30.00
   7  13  -7  176.88   24.20
  -7  13   7  133.49   22.50
  -5 -13   7  -20.80   10.10
   5 -13  -7   -1.30   18.70
  -5 -13   7   11.40    6.40
  -5 -13   7   -9.10   10.20
   5  13  -7   -1.90    9.40
  -5  13   7    0.50   10.90
   3 -13  -7   -9.60   10.60
  -3 -13   7    1.10    5.10
  -3 -13   7   -3.10   10.80
  -3  13   7   -9.50    9.80
   3  13  -7    8.40    9.40
  -1 -13   7   26.20   14.40
   1 -13  -7   30.50   14.10
  -1  13   7   47.40   13.90
  -1 -13  -7   41.00   15.00
   1 -13   7   54.59   17.50
   1  13   7   80.49   16.50
   3 -13   7   45.00   20.00
  -3 -13  -7   29.00   13.90
   3  13   7   75.69   16.00
  -5 -13  -7   23.10   14.40
   5 -13   7   -3.20   14.70
   5  13   7   27.10   13.30
  -8 -14   7   -7.90    7.70
   8 -14  -7    3.40   11.30
  -6 -14   7   39.60    9.20
   6 -14  -7   34.60   13.10
  -6 -14   7   41.10   13.80
   6  14  -7   56.69   14.90
  -6  14   7   48.70   14.90
  -4 -14   7   39.10    8.10
   4 -14  -7   74.79   16.20
  -4 -14   7   40.60   15.20
   4  14  -7   41.20   13.30
  -4  14   7   46.00   13.70
   2 -14  -7   22.90   14.60
  -2 -14   7   51.09   15.70
  -2  14   7   51.59   14.80
   2  14  -7   30.50   12.00
   0 -14   7   70.09   19.40
   0 -14  -7   77.89   18.40
   0  14   7   62.99   16.00
   0  14  -7   48.60   12.80
  28   0  -8  565.64   48.10
  28   0  -8  575.34   45.30
  28   0  -8  737.63   58.99
  26   0  -8  640.34   49.30
  26   0  -8  577.44   50.79
  26   0  -8  666.83   44.80
  26   0  -8  736.23   48.60
  24   0  -8  529.65   37.90
  24   0  -8  501.05   35.50
  24   0  -8  482.85   39.50
  22   0  -8   60.09    9.70
  22   0  -8   59.69   12.60
  20   0  -8   43.70    8.20
  20   0  -8   36.10   10.40
  18   0  -8   86.69   10.50
  18   0  -8   82.19   13.00
 -16   0   8   13.60    6.40
  16   0  -8   30.30    5.60
  16   0  -8   18.20    7.50
  14   0  -8  269.37   21.10
  14   0  -8  247.48   21.30
 -14   0   8  269.67   17.70
 -14   0   8  252.47   21.60
  12   0  -8  311.17   22.80
 -12   0   8  303.07   22.80
 -12   0   8  255.47   19.30
  12   0  -8  298.27   22.50
 -10   0   8 1270.57   76.09
  10   0  -8 1181.18   75.59
 -10   0   8 1241.58   73.79
  10   0  -8 1220.48   76.09
  -8   0   8 5367.46  320.27
   8   0  -8 5350.76  321.17
  -8   0   8 5754.72  321.77
   8   0  -8 5461.45  322.17
  -6   0   8 6991.20  387.66
  -6   0   8 6347.46  388.46
   6   0  -8 6790.52  388.76
   6   0  -8 6393.86  387.16
   4   0  -8 5375.36  321.57
   4   0  -8 5620.44  323.57
  -4   0   8 5451.75  321.67
  -4   0   8 5565.44  323.67
  -2   0   8 3113.99  185.98
   2   0  -8 3177.28  185.88
   2   0  -8 3075.89  183.58
   0   0  -8 1990.80  119.79
   0   0  -8 2078.79  122.29
   0   0   8 1985.40  122.39
  -2   0  -8   86.49   12.40
   2   0   8   95.89   13.20
  -4   0  -8  117.59   11.40
   4   0   8   83.89   14.10
  -4   0  -8   89.59   12.80
  -6   0  -8  568.34   35.80
  -6   0  -8  460.75   42.70
   6   0   8  541.55   38.90
  -8   0  -8   11.80    4.80
  -8   0  -8    7.60    7.80
   8   0   8    1.50    8.30
  10   0   8    0.10    9.00
  12   0   8  103.39   16.10
 -12   0  -8   85.59   13.80
  14   0   8  381.86   35.40
  16   0   8 1050.89   72.89
  18   0   8  894.21   64.89
  20   0   8  739.83   58.19
  29  -1  -8  280.97   33.00
  29   1  -8  373.86   37.50
  29   1  -8  422.16   32.30
  29   1  -8  307.47   29.40
  27  -1  -8  637.84   43.70
  27  -1  -8  426.86   41.90
  27  -1  -8  598.94   40.40
  27   1  -8  457.95   56.79
  27   1  -8  544.65   43.60
  25  -1  -8  456.15   43.40
  25  -1  -8  521.55   40.40
  25  -1  -8  534.85   39.30
  25   1  -8  503.55   37.40
  25   1  -8  539.75   49.70
  25   1  -8  427.66   41.90
  23  -1  -8  385.46   33.00
  23  -1  -8  378.56   30.40
  23   1  -8  472.45   37.10
  23   1  -8  367.06   27.00
  23   1  -8  366.96   32.30
  21  -1  -8   22.60    9.50
  21  -1  -8   -0.70    7.50
  21   1  -8    1.30    7.40
  21   1  -8   19.30    9.10
  19  -1  -8   81.49   13.40
  19  -1  -8   67.69   12.60
  19   1  -8   88.49   14.90
  17  -1  -8  184.38   20.30
  17  -1  -8  215.78   17.60
  17   1  -8  201.08   15.10
  17   1  -8  225.98   20.10
 -15  -1   8    0.00    4.70
  15  -1  -8    0.60    5.20
  15  -1  -8    8.30    5.20
 -15   1   8    0.80    5.20
  15   1  -8   -2.00    4.90
 -15   1   8    5.40    3.90
  15   1  -8    8.80    7.00
 -13  -1   8   23.60    6.30
  13  -1  -8   26.70    6.00
 -13  -1   8   22.70    3.70
  13  -1  -8   29.50    6.80
 -13   1   8   36.10    6.60
  13   1  -8   29.60    6.90
  13   1  -8   22.40    6.10
  11  -1  -8   69.39   10.60
 -11  -1   8   71.49   10.20
  11  -1  -8   85.99   11.40
  11   1  -8   66.69   10.00
 -11   1   8   85.59    9.40
 -11   1   8   84.89   10.70
  11   1  -8   85.79   11.30
   9  -1  -8  924.01   60.19
  -9  -1   8  936.41   59.99
  -9  -1   8  948.71   58.09
   9  -1  -8  929.01   60.89
   9   1  -8  938.91   59.59
  -9   1   8  967.60   60.49
  -9   1   8 1118.79   59.59
   9   1  -8  929.11   60.19
   7  -1  -8 2321.87  134.79
  -7  -1   8 2316.47  134.29
  -7  -1   8 2285.97  135.19
   7  -1  -8 2244.98  135.69
   7   1  -8 2219.18  134.99
   7   1  -8 2176.38  133.69
  -7   1   8 2317.67  134.79
  -7   1   8 2154.48  133.99
  -5  -1   8 3349.56  189.48
   5  -1  -8 3166.58  191.28
  -5  -1   8 3142.09  191.08
   5  -1  -8 3135.99  189.98
  -5   1   8 3247.78  190.08
   5   1  -8 3066.49  189.08
   5   1  -8 3255.67  190.98
  -5   1   8 3171.38  191.38
  -5   1   8 3430.36  190.38
  -3  -1   8 2703.73  158.48
   3  -1  -8 2480.45  156.68
   3  -1  -8 2628.84  158.48
  -3   1   8 2649.93  158.58
  -3   1   8 2732.33  156.78
   3   1  -8 2655.93  158.08
   3   1  -8 2684.23  155.88
  -1  -1   8 3289.07  193.28
   1  -1  -8 3057.69  191.08
   1  -1  -8 3244.48  193.08
   1   1  -8 3245.48  190.08
   1   1  -8 3368.26  193.08
  -1   1   8 3261.87  193.28
  -1  -1  -8 2758.62  164.68
   1  -1   8 2671.53  166.78
  -1  -1  -8 2804.72  166.58
   1   1   8 2829.62  166.88
  -1   1  -8 2806.42  163.48
  -1   1  -8 2821.22  166.48
  -3  -1  -8  148.29   15.70
  -3  -1  -8  169.28   13.60
   3  -1   8  147.29   16.90
  -3   1  -8  160.38   16.00
  -3   1  -8  123.59   11.60
   3   1   8  158.18   16.60
  -5  -1  -8  162.98   16.40
  -5  -1  -8  166.48   14.10
   5  -1   8  154.38   18.00
  -5   1  -8  158.18   12.00
   5   1   8  139.89   17.10
   7  -1   8  233.48   24.00
  -7  -1  -8  261.07   18.70
  -7   1  -8  203.08   20.80
   7   1   8  195.68   21.60
   9  -1   8   63.09   12.80
  -9  -1  -8   45.60   10.00
  -9  -1  -8   35.00    6.90
  -9   1  -8   19.60   16.20
  -9   1  -8   58.79   10.40
   9   1   8   68.89   12.00
 -11  -1  -8  146.39   16.00
  11  -1   8  150.48   22.40
 -11   1  -8  178.88   17.30
  11   1   8  170.08   21.80
 -13  -1  -8  556.64   40.90
  13  -1   8  649.34   48.40
 -13   1  -8  637.24   42.80
  13   1   8  650.03   47.20
  15  -1   8  420.56   39.40
  15   1   8  451.25   38.60
  17  -1   8  764.52   58.69
  17   1   8  798.32   57.99
  19  -1   8  568.64   49.30
  19   1   8  555.14   46.70
  21   1   8  211.08   32.80
  28  -2  -8   34.00   13.30
  28  -2  -8    7.10   12.10
  28   2  -8   13.70   14.40
  28   2  -8   16.00   10.90
  26  -2  -8   14.40   11.10
  26  -2  -8   25.10   11.80
  26  -2  -8   22.80   14.40
  26   2  -8   20.10   13.60
  26   2  -8   18.50   14.30
  24  -2  -8   23.50   10.50
  24  -2  -8   13.00   10.30
  24  -2  -8   25.10   11.40
  24   2  -8   12.20   12.20
  24   2  -8   13.50    8.80
  24   2  -8   32.80   11.20
  22  -2  -8   43.00   11.80
  22  -2  -8   42.50   13.40
  22   2  -8   20.10    8.30
  22   2  -8   55.49   11.70
  22   2  -8   28.70   11.50
  20  -2  -8  357.16   29.70
  20  -2  -8  394.06   31.80
  20   2  -8  361.66   30.10
  18  -2  -8  866.01   54.69
  18  -2  -8  790.32   56.29
  18   2  -8  805.82   53.79
  18   2  -8  871.31   55.59
 -16  -2   8  538.95   38.80
  16  -2  -8  530.55   39.10
  16  -2  -8  521.95   36.70
  16   2  -8  547.15   37.80
 -16   2   8  544.45   35.80
  16   2  -8  570.24   37.00
  14  -2  -8  807.62   55.99
  14  -2  -8  859.31   53.89
 -14   2   8  858.11   52.79
 -14   2   8  846.62   55.59
  14   2  -8  847.42   54.19
  14   2  -8  843.32   53.69
  12  -2  -8  428.26   31.40
 -12  -2   8  474.35   32.20
  12  -2  -8  468.95   32.80
 -12   2   8  447.56   33.80
  12   2  -8  494.45   31.50
  12   2  -8  468.05   31.50
 -12   2   8  433.86   30.50
 -10  -2   8 1120.99   66.99
  10  -2  -8 1071.79   66.59
  10  -2  -8 1022.70   67.29
 -10   2   8 1097.09   67.49
  10   2  -8 1137.09   66.79
  10   2  -8 1076.19   66.09
 -10   2   8  994.70   65.79
   8  -2  -8   86.89   11.80
  -8  -2   8  109.79   10.40
  -8  -2   8  116.19   11.80
   8  -2  -8   88.49   11.10
  -8   2   8   97.29   10.70
  -8   2   8   97.89   10.70
   8   2  -8  107.19   11.40
   8   2  -8   98.09    9.90
  -6  -2   8  114.29    9.70
   6  -2  -8   94.09   10.70
   6  -2  -8   91.49   11.90
  -6  -2   8  106.59   11.80
  -6   2   8   95.79   11.40
   6   2  -8  102.79   11.70
   6   2  -8   94.29    9.30
  -6   2   8  100.19   10.20
   4  -2  -8  265.97   18.10
   4  -2  -8  202.28   18.70
  -4  -2   8  203.88   15.50
  -4  -2   8  207.28   18.50
   4   2  -8  234.38   18.60
  -4   2   8  246.98   17.40
  -4   2   8  240.48   19.00
   4   2  -8  200.88   15.40
   2  -2  -8  343.37   26.10
   2  -2  -8  399.56   28.20
  -2  -2   8  399.56   28.20
   2   2  -8  358.76   27.30
   2   2  -8  406.56   24.20
  -2   2   8  364.46   27.90
   0  -2  -8  345.17   26.60
   0  -2  -8  346.77   25.10
   0  -2   8  348.37   27.30
   0   2  -8  337.07   26.10
   0   2  -8  386.26   22.70
   0   2   8  349.67   27.10
   2  -2   8  110.29   15.30
  -2  -2  -8  105.89   12.30
  -2  -2  -8  133.09   14.10
  -2   2  -8   95.89    8.90
  -2   2  -8  110.09   13.40
   2   2   8  120.49   14.40
   4  -2   8  751.32   51.39
  -4  -2  -8  751.52   48.50
  -4  -2  -8  748.93   50.19
   4   2   8  785.82   50.79
  -6  -2  -8 1486.85   93.89
  -6  -2  -8 1427.06   91.59
  -6   2  -8 1578.04   93.79
   6   2   8 1530.25   94.19
  -8  -2  -8 1280.17   93.59
   8  -2   8 1470.95   95.99
   8   2   8 1613.24   97.89
  -8   2  -8 1672.53   91.19
 -10  -2  -8  629.44   49.80
  10  -2   8  749.13   53.29
 -10   2  -8  849.22   47.90
  10   2   8  703.73   51.29
  12  -2   8  317.17   32.30
  12   2   8  287.37   29.70
 -12   2  -8  333.57   25.50
  12   2   8  303.97   27.00
  14  -2   8   80.79   16.40
  14   2   8   65.69   13.90
 -14   2  -8   77.79   12.30
  14   2   8  103.59   16.70
  16  -2   8  160.88   27.50
  16   2   8  148.89   25.00
  16   2   8  176.18   24.50
  18  -2   8   85.89   18.70
  18   2   8   74.39   14.90
  18   2   8   86.79   17.20
  20  -2   8   27.50   17.20
  20   2   8   65.49   16.40
  20   2   8   52.79   12.50
  27  -3  -8   40.70   13.80
  27  -3  -8   57.39   14.40
  27   3  -8   14.40   13.90
  25  -3  -8   70.39   13.60
  25  -3  -8  117.89   27.10
  25   3  -8   52.99   10.20
  25   3  -8   59.49   10.90
  25   3  -8   53.49   15.80
  23  -3  -8   -9.80   10.40
  23  -3  -8    7.80   10.10
  23   3  -8    3.20    6.30
  23   3  -8  -14.80    9.40
  23   3  -8    6.50    7.20
  21  -3  -8  223.38   23.20
  21  -3  -8  280.77   25.90
  21   3  -8  234.28   23.60
  21   3  -8  207.28   26.70
  19  -3  -8  905.81   59.59
  19  -3  -8  821.42   55.09
  19   3  -8  865.21   51.09
  19   3  -8  716.43   52.59
  19   3  -8  649.04   54.59
  17  -3  -8 1270.97   82.29
  17  -3  -8 1303.57   80.69
  17   3  -8 1096.59   81.99
  17   3  -8 1279.87   80.39
  17   3  -8 1468.85   79.19
 -17   3   8 1258.97   79.19
  15  -3  -8 1533.15   97.99
  15  -3  -8 1613.34   99.89
 -15  -3   8 1527.05   98.99
  15   3  -8 1640.74   99.29
  15   3  -8 1683.73   96.69
 -15   3   8 1568.64   96.89
  13  -3  -8 2299.37  136.49
 -13  -3   8 2191.38  134.39
  13  -3  -8 2134.49  133.79
  13   3  -8 2204.78  133.19
  13   3  -8 2292.97  132.59
 -13   3   8 2252.37  132.99
 -13   3   8 2170.88  134.89
  11  -3  -8   57.49   10.60
  11  -3  -8   53.29    9.00
 -11  -3   8   64.69    9.40
 -11   3   8   67.79    9.40
  11   3  -8   66.69    9.40
  11   3  -8   57.89    8.90
 -11   3   8   39.90    9.60
  -9  -3   8   50.39    8.70
   9  -3  -8   51.99    8.60
  -9  -3   8   41.20    7.00
   9  -3  -8   30.20    7.20
   9   3  -8   41.70    6.90
  -9   3   8   48.90    7.60
  -9   3   8   35.60    7.10
   9   3  -8   43.50    7.10
  -7  -3   8    4.00    3.50
   7  -3  -8    4.10    4.60
   7  -3  -8    2.60    4.60
   7  -3  -8   13.10    6.70
  -7  -3   8    8.20    5.00
  -7   3   8    8.10    5.30
   7   3  -8    5.90    3.70
   7   3  -8    4.60    4.50
  -7   3   8    7.20    4.00
  -5  -3   8 1460.75   87.49
   5  -3  -8 1333.57   87.09
   5  -3  -8 1346.87   87.99
  -5  -3   8 1551.04   85.19
  -5   3   8 1361.66   86.79
  -5   3   8 1505.75   87.49
   5   3  -8 1408.86   86.89
   5   3  -8 1412.86   84.49
[truncated: 270,879 more chars]
