# Supplementary material
Source: publisher figshare collection journal article supplement (https://acs.figshare.com/ndownloader/files/22494656)
Supplement: Supplementary file 1 [file 22494656 › CIF/1Q.cif]

data_1q
_audit_creation_date               2019-02-21
_audit_creation_method
;
Olex2 1.2
(compiled 2018.05.29 svn.r3508 for OlexSys, GUI svn.r5506)
;
_shelx_SHELXL_version_number       '2016/6'
_audit_contact_author_address      ?
_audit_contact_author_email        ?
_audit_contact_author_name         ''
_audit_contact_author_phone        ?
_publ_contact_author_id_orcid      ?
_publ_section_references
;
Dolomanov, O.V., Bourhis, L.J., Gildea, R.J, Howard, J.A.K. & Puschmann, H.
 (2009), J. Appl. Cryst. 42, 339-341.

Sheldrick, G.M. (2008). Acta Cryst. A64, 112-122.
;
_chemical_name_common              ?
_chemical_name_systematic          ?
_chemical_formula_moiety           '0.5(C88 H68 Cu4 I4 N12 O4), 2(C2 H4 Cl2)'
_chemical_formula_sum              'C48 H42 Cl4 Cu2 I2 N6 O2'
_chemical_formula_weight           1257.55
_chemical_melting_point            ?
loop_
  _atom_type_symbol
  _atom_type_description
  _atom_type_scat_dispersion_real
  _atom_type_scat_dispersion_imag
  _atom_type_scat_source
 'C' 'C' 0.0033 0.0016 'International Tables Vol C Tables 4.2.6.8 and 6.1.1.4'
 'H' 'H' 0.0000 0.0000 'International Tables Vol C Tables 4.2.6.8 and 6.1.1.4'
 'Cl' 'Cl' 0.1484 0.1585 'International Tables Vol C Tables 4.2.6.8 and 6.1.1.4'
 'Cu' 'Cu' 0.3201 1.2651 'International Tables Vol C Tables 4.2.6.8 and 6.1.1.4'
 'I' 'I' -0.4742 1.8119 'International Tables Vol C Tables 4.2.6.8 and 6.1.1.4'
 'N' 'N' 0.0061 0.0033 'International Tables Vol C Tables 4.2.6.8 and 6.1.1.4'
 'O' 'O' 0.0106 0.0060 'International Tables Vol C Tables 4.2.6.8 and 6.1.1.4'

_shelx_space_group_comment
;
The symmetry employed for this shelxl refinement is uniquely defined
by the following loop, which should always be used as a source of
symmetry information in preference to the above space-group names.
They are only intended as comments.
;
_space_group_crystal_system        'monoclinic'
_space_group_IT_number             15
_space_group_name_H-M_alt          'C 1 2/c 1'
_space_group_name_Hall             '-C 2yc'
loop_
  _space_group_symop_operation_xyz
 'x, y, z'
 '-x, y, -z+1/2'
 'x+1/2, y+1/2, z'
 '-x+1/2, y+1/2, -z+1/2'
 '-x, -y, -z'
 'x, -y, z-1/2'
 '-x+1/2, -y+1/2, -z'
 'x+1/2, -y+1/2, z-1/2'

_cell_length_a                     25.122(3)
_cell_length_b                     11.9422(11)
_cell_length_c                     17.937(2)
_cell_angle_alpha                  90
_cell_angle_beta                   113.817(5)
_cell_angle_gamma                  90
_cell_volume                       4922.9(9)
_cell_formula_units_Z              4
_cell_measurement_reflns_used      9903
_cell_measurement_temperature      100(2)
_cell_measurement_theta_max        25.791
_cell_measurement_theta_min        2.398
_shelx_estimated_absorpt_T_max     0.647
_shelx_estimated_absorpt_T_min     0.414
_exptl_absorpt_coefficient_mu      2.380
_exptl_absorpt_correction_T_max    0.7452
_exptl_absorpt_correction_T_min    0.3566
_exptl_absorpt_correction_type     multi-scan
_exptl_absorpt_process_details    
 'SADABS-2014/4 (Bruker,2014/4) was used for absorption correction. wR2(int) was 0.1568 before and 0.0682 after correction. The Ratio of minimum to maximum transmission is 0.4785. The \l/2 correction factor is 0.00150.'
_exptl_absorpt_special_details     ?
_exptl_crystal_colour              'clear dark brown'
_exptl_crystal_colour_lustre       clear
_exptl_crystal_colour_modifier     dark
_exptl_crystal_colour_primary      brown
_exptl_crystal_density_diffrn      1.697
_exptl_crystal_density_meas        ?
_exptl_crystal_density_method      ?
_exptl_crystal_description         block
_exptl_crystal_F_000               2480
_exptl_crystal_size_max            0.45
_exptl_crystal_size_mid            0.23
_exptl_crystal_size_min            0.2
_exptl_transmission_factor_max     ?
_exptl_transmission_factor_min     ?
_diffrn_reflns_av_R_equivalents    0.0377
_diffrn_reflns_av_unetI/netI       0.0336
_diffrn_reflns_Laue_measured_fraction_full  0.989
_diffrn_reflns_Laue_measured_fraction_max  0.957
_diffrn_reflns_limit_h_max         30
_diffrn_reflns_limit_h_min         -30
_diffrn_reflns_limit_k_max         14
_diffrn_reflns_limit_k_min         -14
_diffrn_reflns_limit_l_max         21
_diffrn_reflns_limit_l_min         -17
_diffrn_reflns_number              15735
_diffrn_reflns_point_group_measured_fraction_full  0.989
_diffrn_reflns_point_group_measured_fraction_max  0.957
_diffrn_reflns_theta_full          25.242
_diffrn_reflns_theta_max           25.984
_diffrn_reflns_theta_min           1.922
_diffrn_ambient_temperature        100
_diffrn_detector_area_resol_mean   ?
_diffrn_measured_fraction_theta_full  0.989
_diffrn_measured_fraction_theta_max  0.957
_diffrn_measurement_device_type    'Bruker APEX-II CCD'
_diffrn_measurement_method         '\f and \w scans'
_diffrn_radiation_type             MoK\a
_diffrn_radiation_wavelength       0.71073
_diffrn_source                     ?
_diffrn_standards_number           0
_reflns_Friedel_coverage           0.000
_reflns_Friedel_fraction_full      .
_reflns_Friedel_fraction_max       .
_reflns_number_gt                  3754
_reflns_number_total               4628
_reflns_special_details
;
 Reflections were merged by SHELXL according to the crystal
 class for the calculation of statistics and refinement.
 
 _reflns_Friedel_fraction is defined as the number of unique
 Friedel pairs measured divided by the number that would be
 possible theoretically, ignoring centric projections and
 systematic absences.
;
_reflns_threshold_expression       'I > 2\s(I)'
_computing_cell_refinement         'SAINT v8.34A (Bruker, 2013)'
_computing_data_collection         ?
_computing_data_reduction          'SAINT v8.34A (Bruker, 2013)'
_computing_molecular_graphics      'Olex2 (Dolomanov et al., 2009)'
_computing_publication_material    'Olex2 (Dolomanov et al., 2009)'
_computing_structure_refinement    'XL (Sheldrick, 2008)'
_computing_structure_solution      'ShelXS (Sheldrick, 2008)'
_refine_diff_density_max           1.599
_refine_diff_density_min           -1.723
_refine_diff_density_rms           0.176
_refine_ls_extinction_coef         .
_refine_ls_extinction_method       none
_refine_ls_goodness_of_fit_ref     1.094
_refine_ls_hydrogen_treatment      constr
_refine_ls_matrix_type             full
_refine_ls_number_parameters       290
_refine_ls_number_reflns           4628
_refine_ls_number_restraints       0
_refine_ls_R_factor_all            0.0719
_refine_ls_R_factor_gt             0.0554
_refine_ls_restrained_S_all        1.094
_refine_ls_shift/su_max            0.001
_refine_ls_shift/su_mean           0.000
_refine_ls_structure_factor_coef   Fsqd
_refine_ls_weighting_details      
 'w=1/[\s^2^(Fo^2^)+(0.0542P)^2^+100.5781P] where P=(Fo^2^+2Fc^2^)/3'
_refine_ls_weighting_scheme        calc
_refine_ls_wR_factor_gt            0.1333
_refine_ls_wR_factor_ref           0.1486
_refine_special_details            ?
_olex2_refinement_description
;
1. Fixed Uiso
 At 1.2 times of:
  All C(H) groups, All C(H,H) groups
 At 1.5 times of:
  All C(H,H,H) groups
2.a Secondary CH2 refined with riding coordinates:
 C22S(H22D,H22E), C23S(H23A,H23B)
2.b Aromatic/amide H refined with riding coordinates:
 C9(H9), C17(H17), C7(H7), C21(H21), C15(H15), C13(H13), C5(H5), C14(H14),
 C4(H4), C20(H20), C12(H12), C18(H18), C1(H1), C2(H2)
2.c Idealised Me refined as rotating group:
 C22(H22A,H22B,H22C)
;
_atom_sites_solution_hydrogens     geom
_atom_sites_solution_primary       direct
_atom_sites_solution_secondary     ?
loop_
  _atom_site_label
  _atom_site_type_symbol
  _atom_site_fract_x
  _atom_site_fract_y
  _atom_site_fract_z
  _atom_site_U_iso_or_equiv
  _atom_site_adp_type
  _atom_site_occupancy
  _atom_site_site_symmetry_order
  _atom_site_calc_flag
  _atom_site_refinement_flags_posn
  _atom_site_refinement_flags_adp
  _atom_site_refinement_flags_occupancy
  _atom_site_disorder_assembly
  _atom_site_disorder_group
 I1 I 0.54026(2) 0.15204(4) 0.45973(3) 0.02883(16) Uani 1 1 d . . . . .
 Cu1 Cu 0.50127(3) 0.05572(7) 0.56125(5) 0.0265(2) Uani 1 1 d . . . . .
 Cl1 Cl 0.4191(2) 0.4583(4) 0.9426(3) 0.144(2) Uani 1 1 d . . . . .
 Cl2 Cl 0.4353(3) 0.4634(5) 0.7718(3) 0.190(3) Uani 1 1 d . . . . .
 O1 O 0.2833(3) 0.8961(5) 0.7656(3) 0.0459(13) Uani 1 1 d . . . . .
 N1 N 0.4310(2) 0.1517(4) 0.5448(3) 0.0261(11) Uani 1 1 d . . . . .
 N3 N 0.0654(2) 0.4362(5) 0.1747(3) 0.0286(12) Uani 1 1 d . . . . .
 N2 N 0.2481(2) 0.3814(5) 0.4279(3) 0.0265(11) Uani 1 1 d . . . . .
 C8 C 0.2576(3) 0.5588(5) 0.5346(4) 0.0231(12) Uani 1 1 d . . . . .
 C9 C 0.2101(3) 0.5492(5) 0.4609(4) 0.0247(13) Uani 1 1 d . . . . .
 H9 H 0.180220 0.604168 0.445186 0.030 Uiso 1 1 calc R . . . .
 C11 C 0.1560(3) 0.4483(5) 0.3299(4) 0.0259(13) Uani 1 1 d . . . . .
 C10 C 0.2060(3) 0.4592(5) 0.4098(4) 0.0247(13) Uani 1 1 d . . . . .
 C6 C 0.2949(3) 0.3908(5) 0.4987(4) 0.0245(13) Uani 1 1 d . . . . .
 C17 C 0.3176(3) 0.6786(6) 0.6543(4) 0.0313(14) Uani 1 1 d . . . . .
 H17 H 0.351471 0.639888 0.657275 0.038 Uiso 1 1 calc R . . . .
 C7 C 0.3004(3) 0.4758(5) 0.5532(4) 0.0247(13) Uani 1 1 d . . . . .
 H7 H 0.333480 0.478116 0.603630 0.030 Uiso 1 1 calc R . . . .
 C21 C 0.2154(3) 0.7115(5) 0.5885(4) 0.0278(13) Uani 1 1 d . . . . .
 H21 H 0.178418 0.695696 0.546488 0.033 Uiso 1 1 calc R . . . .
 C16 C 0.2637(3) 0.6515(5) 0.5919(4) 0.0230(12) Uani 1 1 d . . . . .
 C15 C 0.1573(3) 0.3720(6) 0.2722(4) 0.0303(14) Uani 1 1 d . . . . .
 H15 H 0.189358 0.322303 0.285050 0.036 Uiso 1 1 calc R . . . .
 C3 C 0.3413(3) 0.3065(6) 0.5158(4) 0.0265(13) Uani 1 1 d . . . . .
 C13 C 0.0635(3) 0.5058(7) 0.2317(4) 0.0343(16) Uani 1 1 d . . . . .
 H13 H 0.030394 0.552703 0.218246 0.041 Uiso 1 1 calc R . . . .
 C5 C 0.3817(3) 0.1472(6) 0.4787(4) 0.0349(16) Uani 1 1 d . . . . .
 H5 H 0.377282 0.088902 0.440546 0.042 Uiso 1 1 calc R . . . .
 C14 C 0.1120(3) 0.3684(6) 0.1959(4) 0.0332(15) Uani 1 1 d . . . . .
 H14 H 0.113718 0.316088 0.157116 0.040 Uiso 1 1 calc R . . . .
 C4 C 0.3366(3) 0.2218(7) 0.4619(4) 0.0357(16) Uani 1 1 d . . . . .
 H4 H 0.302355 0.214715 0.413209 0.043 Uiso 1 1 calc R . . . .
 C20 C 0.2202(3) 0.7939(6) 0.6450(4) 0.0296(14) Uani 1 1 d . . . . .
 H20 H 0.186856 0.834839 0.641476 0.035 Uiso 1 1 calc R . . . .
 C12 C 0.1067(3) 0.5136(7) 0.3087(4) 0.0340(16) Uani 1 1 d . . . . .
 H12 H 0.102632 0.563642 0.347278 0.041 Uiso 1 1 calc R . . . .
 C18 C 0.3228(3) 0.7597(6) 0.7112(4) 0.0351(16) Uani 1 1 d . . . . .
 H18 H 0.359784 0.776267 0.753072 0.042 Uiso 1 1 calc R . . . .
 C19 C 0.2743(3) 0.8163(6) 0.7070(4) 0.0348(16) Uani 1 1 d . . . . .
 C22 C 0.2364(4) 0.9679(8) 0.7562(6) 0.058(2) Uani 1 1 d . . . . .
 H22A H 0.221044 1.000536 0.701411 0.087 Uiso 1 1 calc GR . . . .
 H22B H 0.249891 1.027861 0.796866 0.087 Uiso 1 1 calc GR . . . .
 H22C H 0.205649 0.925095 0.763756 0.087 Uiso 1 1 calc GR . . . .
 C1 C 0.4352(4) 0.2319(8) 0.5967(5) 0.058(3) Uani 1 1 d . . . . .
 H1 H 0.469698 0.236423 0.645268 0.069 Uiso 1 1 calc R . . . .
 C2 C 0.3922(4) 0.3101(8) 0.5845(5) 0.062(3) Uani 1 1 d . . . . .
 H2 H 0.397802 0.367033 0.623932 0.074 Uiso 1 1 calc R . . . .
 C22S C 0.4261(6) 0.5708(16) 0.8927(9) 0.111(5) Uani 1 1 d . . . . .
 H22D H 0.387200 0.590701 0.850905 0.133 Uiso 1 1 calc R . . . .
 H22E H 0.439370 0.634065 0.931587 0.133 Uiso 1 1 calc R . . . .
 C23S C 0.4673(9) 0.5588(17) 0.8515(10) 0.143(8) Uani 1 1 d . . . . .
 H23A H 0.505463 0.530535 0.890462 0.171 Uiso 1 1 calc R . . . .
 H23B H 0.473279 0.631963 0.830083 0.171 Uiso 1 1 calc R . . . .

loop_
  _atom_site_aniso_label
  _atom_site_aniso_U_11
  _atom_site_aniso_U_22
  _atom_site_aniso_U_33
  _atom_site_aniso_U_23
  _atom_site_aniso_U_13
  _atom_site_aniso_U_12
 I1 0.0273(2) 0.0294(3) 0.0292(2) 0.00157(17) 0.01080(18) -0.00055(16)
 Cu1 0.0202(4) 0.0315(4) 0.0235(4) 0.0011(3) 0.0044(3) 0.0049(3)
 Cl1 0.125(3) 0.098(3) 0.124(3) 0.016(2) -0.039(3) -0.043(3)
 Cl2 0.224(6) 0.161(5) 0.088(3) -0.056(3) -0.038(3) 0.093(4)
 O1 0.068(4) 0.039(3) 0.033(3) -0.015(2) 0.023(3) -0.007(3)
 N1 0.021(3) 0.028(3) 0.027(3) -0.003(2) 0.007(2) 0.003(2)
 N3 0.020(2) 0.037(3) 0.023(3) 0.000(2) 0.002(2) 0.004(2)
 N2 0.020(2) 0.036(3) 0.020(3) -0.005(2) 0.005(2) 0.003(2)
 C8 0.020(3) 0.026(3) 0.021(3) 0.003(2) 0.006(2) -0.001(2)
 C9 0.026(3) 0.026(3) 0.022(3) 0.003(2) 0.009(3) 0.003(2)
 C11 0.024(3) 0.030(3) 0.024(3) -0.001(3) 0.010(3) -0.001(3)
 C10 0.023(3) 0.024(3) 0.028(3) 0.005(3) 0.010(3) 0.001(2)
 C6 0.025(3) 0.025(3) 0.020(3) 0.000(2) 0.006(2) 0.002(3)
 C17 0.032(3) 0.031(4) 0.027(3) -0.001(3) 0.008(3) -0.001(3)
 C7 0.022(3) 0.029(3) 0.019(3) 0.001(2) 0.004(2) 0.004(2)
 C21 0.029(3) 0.027(3) 0.027(3) 0.001(3) 0.011(3) -0.003(3)
 C16 0.026(3) 0.025(3) 0.016(3) 0.000(2) 0.006(2) -0.003(2)
 C15 0.028(3) 0.031(3) 0.027(3) -0.002(3) 0.006(3) 0.009(3)
 C3 0.022(3) 0.030(3) 0.026(3) -0.005(3) 0.007(3) 0.004(3)
 C13 0.022(3) 0.047(4) 0.032(4) -0.004(3) 0.008(3) 0.014(3)
 C5 0.029(3) 0.038(4) 0.031(4) -0.016(3) 0.005(3) 0.005(3)
 C14 0.030(3) 0.036(4) 0.030(3) -0.011(3) 0.008(3) 0.002(3)
 C4 0.020(3) 0.048(4) 0.028(3) -0.004(3) -0.002(3) 0.013(3)
 C20 0.033(3) 0.027(3) 0.031(3) 0.000(3) 0.016(3) 0.002(3)
 C12 0.027(3) 0.050(4) 0.024(3) -0.007(3) 0.009(3) 0.005(3)
 C18 0.038(4) 0.031(4) 0.027(3) -0.002(3) 0.003(3) -0.006(3)
 C19 0.052(4) 0.030(4) 0.026(3) -0.002(3) 0.019(3) -0.010(3)
 C22 0.070(6) 0.054(5) 0.065(6) -0.032(5) 0.044(5) -0.010(5)
 C1 0.040(4) 0.068(6) 0.036(4) -0.024(4) -0.016(3) 0.024(4)
 C2 0.050(5) 0.066(6) 0.040(4) -0.026(4) -0.013(4) 0.038(5)
 C22S 0.087(9) 0.159(16) 0.072(8) 0.022(9) 0.016(7) 0.026(10)
 C23S 0.146(16) 0.150(17) 0.087(11) -0.052(11) 0.000(11) 0.028(13)

_geom_special_details
;
 All esds (except the esd in the dihedral angle between two l.s. planes)
 are estimated using the full covariance matrix.  The cell esds are taken
 into account individually in the estimation of esds in distances, angles
 and torsion angles; correlations between esds in cell parameters are only
 used when they are defined by crystal symmetry.  An approximate (isotropic)
 treatment of cell esds is used for estimating esds involving l.s. planes.
;
loop_
  _geom_bond_atom_site_label_1
  _geom_bond_atom_site_label_2
  _geom_bond_distance
  _geom_bond_site_symmetry_2
  _geom_bond_publ_flag
 I1 Cu1 2.6533(9) . ?
 I1 Cu1 2.6586(9) 5_656 ?
 Cu1 Cu1 2.5476(16) 5_656 ?
 Cu1 N1 2.025(5) . ?
 Cu1 N3 2.025(5) 8_556 ?
 Cl1 C22S 1.662(18) . ?
 Cl2 C23S 1.749(15) . ?
 O1 C19 1.369(9) . ?
 O1 C22 1.411(11) . ?
 N1 C5 1.325(9) . ?
 N1 C1 1.310(9) . ?
 N3 C13 1.334(9) . ?
 N3 C14 1.344(9) . ?
 N2 C10 1.345(8) . ?
 N2 C6 1.341(8) . ?
 C8 C9 1.383(9) . ?
 C8 C7 1.401(9) . ?
 C8 C16 1.476(9) . ?
 C9 H9 0.9500 . ?
 C9 C10 1.390(9) . ?
 C11 C10 1.481(9) . ?
 C11 C15 1.391(9) . ?
 C11 C12 1.381(9) . ?
 C6 C7 1.376(9) . ?
 C6 C3 1.476(9) . ?
 C17 H17 0.9500 . ?
 C17 C16 1.403(9) . ?
 C17 C18 1.374(10) . ?
 C7 H7 0.9500 . ?
 C21 H21 0.9500 . ?
 C21 C16 1.388(9) . ?
 C21 C20 1.382(9) . ?
 C15 H15 0.9500 . ?
 C15 C14 1.382(9) . ?
 C3 C4 1.371(9) . ?
 C3 C2 1.372(10) . ?
 C13 H13 0.9500 . ?
 C13 C12 1.372(9) . ?
 C5 H5 0.9500 . ?
 C5 C4 1.377(9) . ?
 C14 H14 0.9500 . ?
 C4 H4 0.9500 . ?
 C20 H20 0.9500 . ?
 C20 C19 1.392(10) . ?
 C12 H12 0.9500 . ?
 C18 H18 0.9500 . ?
 C18 C19 1.369(11) . ?
 C22 H22A 0.9800 . ?
 C22 H22B 0.9800 . ?
 C22 H22C 0.9800 . ?
 C1 H1 0.9500 . ?
 C1 C2 1.377(11) . ?
 C2 H2 0.9500 . ?
 C22S H22D 0.9900 . ?
 C22S H22E 0.9900 . ?
 C22S C23S 1.50(2) . ?
 C23S H23A 0.9900 . ?
 C23S H23B 0.9900 . ?

loop_
  _geom_angle_atom_site_label_1
  _geom_angle_atom_site_label_2
  _geom_angle_atom_site_label_3
  _geom_angle
  _geom_angle_site_symmetry_1
  _geom_angle_site_symmetry_3
  _geom_angle_publ_flag
 Cu1 I1 Cu1 57.32(3) . 5_656 ?
 I1 Cu1 I1 122.68(3) . 5_656 ?
 Cu1 Cu1 I1 61.45(3) 5_656 . ?
 Cu1 Cu1 I1 61.24(3) 5_656 5_656 ?
 N1 Cu1 I1 101.36(16) . . ?
 N1 Cu1 I1 103.79(16) . 5_656 ?
 N1 Cu1 Cu1 116.99(16) . 5_656 ?
 N1 Cu1 N3 114.4(2) . 8_556 ?
 N3 Cu1 I1 107.73(16) 8_556 . ?
 N3 Cu1 I1 107.12(17) 8_556 5_656 ?
 N3 Cu1 Cu1 128.63(17) 8_556 5_656 ?
 C19 O1 C22 117.4(6) . . ?
 C5 N1 Cu1 123.4(4) . . ?
 C1 N1 Cu1 119.7(5) . . ?
 C1 N1 C5 116.4(6) . . ?
 C13 N3 Cu1 118.7(4) . 8_455 ?
 C13 N3 C14 117.0(5) . . ?
 C14 N3 Cu1 124.2(5) . 8_455 ?
 C6 N2 C10 118.3(5) . . ?
 C9 C8 C7 116.9(6) . . ?
 C9 C8 C16 122.3(6) . . ?
 C7 C8 C16 120.8(5) . . ?
 C8 C9 H9 120.0 . . ?
 C8 C9 C10 120.0(6) . . ?
 C10 C9 H9 120.0 . . ?
 C15 C11 C10 120.7(6) . . ?
 C12 C11 C10 122.2(6) . . ?
 C12 C11 C15 117.0(6) . . ?
 N2 C10 C9 122.2(6) . . ?
 N2 C10 C11 116.8(6) . . ?
 C9 C10 C11 120.9(6) . . ?
 N2 C6 C7 122.2(6) . . ?
 N2 C6 C3 117.2(5) . . ?
 C7 C6 C3 120.7(5) . . ?
 C16 C17 H17 119.1 . . ?
 C18 C17 H17 119.1 . . ?
 C18 C17 C16 121.8(7) . . ?
 C8 C7 H7 119.8 . . ?
 C6 C7 C8 120.4(5) . . ?
 C6 C7 H7 119.8 . . ?
 C16 C21 H21 119.3 . . ?
 C20 C21 H21 119.3 . . ?
 C20 C21 C16 121.3(6) . . ?
 C17 C16 C8 121.5(6) . . ?
 C21 C16 C8 120.9(6) . . ?
 C21 C16 C17 117.4(6) . . ?
 C11 C15 H15 120.1 . . ?
 C14 C15 C11 119.9(6) . . ?
 C14 C15 H15 120.1 . . ?
 C4 C3 C6 121.4(6) . . ?
 C4 C3 C2 116.1(6) . . ?
 C2 C3 C6 122.5(6) . . ?
 N3 C13 H13 118.1 . . ?
 N3 C13 C12 123.8(6) . . ?
 C12 C13 H13 118.1 . . ?
 N1 C5 H5 118.0 . . ?
 N1 C5 C4 123.9(6) . . ?
 C4 C5 H5 118.0 . . ?
 N3 C14 C15 122.5(6) . . ?
 N3 C14 H14 118.8 . . ?
 C15 C14 H14 118.8 . . ?
 C3 C4 C5 119.7(6) . . ?
 C3 C4 H4 120.2 . . ?
 C5 C4 H4 120.2 . . ?
 C21 C20 H20 120.3 . . ?
 C21 C20 C19 119.3(6) . . ?
 C19 C20 H20 120.3 . . ?
 C11 C12 H12 120.2 . . ?
 C13 C12 C11 119.7(6) . . ?
 C13 C12 H12 120.2 . . ?
 C17 C18 H18 120.3 . . ?
 C19 C18 C17 119.5(7) . . ?
 C19 C18 H18 120.3 . . ?
 O1 C19 C20 123.5(7) . . ?
 C18 C19 O1 115.8(7) . . ?
 C18 C19 C20 120.7(6) . . ?
 O1 C22 H22A 109.5 . . ?
 O1 C22 H22B 109.5 . . ?
 O1 C22 H22C 109.5 . . ?
 H22A C22 H22B 109.5 . . ?
 H22A C22 H22C 109.5 . . ?
 H22B C22 H22C 109.5 . . ?
 N1 C1 H1 118.3 . . ?
 N1 C1 C2 123.3(7) . . ?
 C2 C1 H1 118.3 . . ?
 C3 C2 C1 120.6(7) . . ?
 C3 C2 H2 119.7 . . ?
 C1 C2 H2 119.7 . . ?
 Cl1 C22S H22D 108.4 . . ?
 Cl1 C22S H22E 108.4 . . ?
 H22D C22S H22E 107.5 . . ?
 C23S C22S Cl1 115.5(14) . . ?
 C23S C22S H22D 108.4 . . ?
 C23S C22S H22E 108.4 . . ?
 Cl2 C23S H23A 110.4 . . ?
 Cl2 C23S H23B 110.4 . . ?
 C22S C23S Cl2 106.5(15) . . ?
 C22S C23S H23A 110.4 . . ?
 C22S C23S H23B 110.4 . . ?
 H23A C23S H23B 108.6 . . ?

_shelx_res_file
;
TITL 1q.res in C2/c
    1q.res
    created by SHELXL-2016/6 at 18:06:44 on 21-Feb-2019
REM Old TITL final in C2/c
REM SHELXT solution in C2/c
REM R1 0.109, Rweak 0.001, Alpha 0.045, Orientation as input
REM Formula found by SHELXT: C24 N4 O2 Cu I
CELL 0.71073 25.1215 11.9422 17.9368 90 113.817 90
ZERR 4 0.0026 0.0011 0.002 0 0.005 0
LATT 7
SYMM -X,+Y,0.5-Z
SFAC C H Cl Cu I N O
UNIT 192 168 16 8 8 24 8

L.S. 10
PLAN  20
SIZE 0.45 0.23 0.2
TEMP -153.15
BOND $H
fmap 2
acta
REM <olex2.extras>
REM <HklSrc "%.\\1q.hkl">
REM </olex2.extras>

WGHT    0.054200  100.578102
FVAR       0.17655
I1    5    0.540262    0.152037    0.459725    11.00000    0.02726    0.02941 =
         0.02924    0.00157    0.01080   -0.00055
CU1   4    0.501266    0.055719    0.561251    11.00000    0.02022    0.03145 =
         0.02350    0.00112    0.00442    0.00485
CL1   3    0.419147    0.458325    0.942617    11.00000    0.12480    0.09795 =
         0.12426    0.01625   -0.03884   -0.04325
CL2   3    0.435302    0.463445    0.771844    11.00000    0.22406    0.16098 =
         0.08777   -0.05564   -0.03769    0.09266
O1    7    0.283316    0.896098    0.765643    11.00000    0.06758    0.03921 =
         0.03307   -0.01475    0.02253   -0.00689
N1    6    0.430968    0.151696    0.544846    11.00000    0.02134    0.02782 =
         0.02672   -0.00312    0.00732    0.00284
N3    6    0.065429    0.436195    0.174706    11.00000    0.01951    0.03699 =
         0.02292   -0.00002    0.00195    0.00382
N2    6    0.248095    0.381416    0.427921    11.00000    0.02024    0.03555 =
         0.02036   -0.00462    0.00467    0.00251
C8    1    0.257613    0.558797    0.534638    11.00000    0.02044    0.02629 =
         0.02051    0.00278    0.00599   -0.00131
C9    1    0.210086    0.549199    0.460900    11.00000    0.02550    0.02557 =
         0.02240    0.00308    0.00893    0.00313
AFIX  43
H9    2    0.180220    0.604168    0.445186    11.00000   -1.20000
AFIX   0
C11   1    0.155980    0.448348    0.329912    11.00000    0.02380    0.02975 =
         0.02441   -0.00088    0.00992   -0.00091
C10   1    0.206004    0.459163    0.409783    11.00000    0.02266    0.02422 =
         0.02752    0.00473    0.01048    0.00051
C6    1    0.294876    0.390844    0.498657    11.00000    0.02539    0.02498 =
         0.01971    0.00023    0.00554    0.00205
C17   1    0.317637    0.678625    0.654285    11.00000    0.03203    0.03114 =
         0.02689   -0.00145    0.00786   -0.00104
AFIX  43
H17   2    0.351471    0.639888    0.657275    11.00000   -1.20000
AFIX   0
C7    1    0.300429    0.475783    0.553167    11.00000    0.02152    0.02945 =
         0.01886    0.00083    0.00360    0.00431
AFIX  43
H7    2    0.333480    0.478116    0.603630    11.00000   -1.20000
AFIX   0
C21   1    0.215447    0.711544    0.588474    11.00000    0.02884    0.02724 =
         0.02669    0.00054    0.01059   -0.00344
AFIX  43
H21   2    0.178418    0.695696    0.546488    11.00000   -1.20000
AFIX   0
C16   1    0.263683    0.651537    0.591870    11.00000    0.02553    0.02475 =
         0.01634   -0.00018    0.00615   -0.00317
C15   1    0.157320    0.371954    0.272150    11.00000    0.02757    0.03123 =
         0.02749   -0.00210    0.00634    0.00885
AFIX  43
H15   2    0.189358    0.322303    0.285050    11.00000   -1.20000
AFIX   0
C3    1    0.341295    0.306544    0.515782    11.00000    0.02171    0.02965 =
         0.02580   -0.00507    0.00728    0.00449
C13   1    0.063531    0.505809    0.231730    11.00000    0.02176    0.04700 =
         0.03175   -0.00376    0.00818    0.01355
AFIX  43
H13   2    0.030394    0.552703    0.218246    11.00000   -1.20000
AFIX   0
C5    1    0.381712    0.147157    0.478669    11.00000    0.02880    0.03794 =
         0.03111   -0.01629    0.00501    0.00534
AFIX  43
H5    2    0.377282    0.088902    0.440546    11.00000   -1.20000
AFIX   0
C14   1    0.111950    0.368412    0.195945    11.00000    0.02957    0.03607 =
         0.03020   -0.01148    0.00823    0.00155
AFIX  43
H14   2    0.113718    0.316088    0.157116    11.00000   -1.20000
AFIX   0
C4    1    0.336580    0.221844    0.461884    11.00000    0.02037    0.04802 =
         0.02751   -0.00394   -0.00181    0.01261
AFIX  43
H4    2    0.302355    0.214715    0.413209    11.00000   -1.20000
AFIX   0
C20   1    0.220207    0.793906    0.644961    11.00000    0.03320    0.02718 =
         0.03091   -0.00003    0.01568    0.00230
AFIX  43
H20   2    0.186856    0.834839    0.641476    11.00000   -1.20000
AFIX   0
C12   1    0.106669    0.513591    0.308721    11.00000    0.02681    0.05022 =
         0.02377   -0.00665    0.00885    0.00530
AFIX  43
H12   2    0.102632    0.563642    0.347278    11.00000   -1.20000
AFIX   0
C18   1    0.322831    0.759658    0.711170    11.00000    0.03789    0.03089 =
         0.02711   -0.00150    0.00337   -0.00563
AFIX  43
H18   2    0.359784    0.776267    0.753072    11.00000   -1.20000
AFIX   0
C19   1    0.274337    0.816266    0.706985    11.00000    0.05185    0.02997 =
         0.02550   -0.00237    0.01860   -0.00966
C22   1    0.236389    0.967883    0.756197    11.00000    0.07036    0.05397 =
         0.06464   -0.03170    0.04368   -0.00951
AFIX 137
H22A  2    0.221044    1.000536    0.701411    11.00000   -1.50000
H22B  2    0.249891    1.027861    0.796866    11.00000   -1.50000
H22C  2    0.205649    0.925095    0.763756    11.00000   -1.50000
AFIX   0
C1    1    0.435204    0.231936    0.596727    11.00000    0.03954    0.06758 =
         0.03584   -0.02396   -0.01578    0.02390
AFIX  43
H1    2    0.469698    0.236423    0.645268    11.00000   -1.20000
AFIX   0
C2    1    0.392188    0.310107    0.584467    11.00000    0.04952    0.06555 =
         0.03988   -0.02646   -0.01326    0.03766
AFIX  43
H2    2    0.397802    0.367033    0.623932    11.00000   -1.20000
AFIX   0

C22S  1    0.426063    0.570849    0.892689    11.00000    0.08658    0.15893 =
         0.07226    0.02217    0.01563    0.02591
AFIX  23
H22D  2    0.387200    0.590701    0.850905    11.00000   -1.20000
H22E  2    0.439370    0.634065    0.931587    11.00000   -1.20000
AFIX   0
C23S  1    0.467305    0.558810    0.851514    11.00000    0.14647    0.14975 =
         0.08652   -0.05239    0.00022    0.02810
AFIX  23
H23A  2    0.505463    0.530535    0.890462    11.00000   -1.20000
H23B  2    0.473279    0.631963    0.830083    11.00000   -1.20000
AFIX   0
HKLF 4


REM  1q.res in C2/c
REM R1 =  0.0554 for    3754 Fo > 4sig(Fo)  and  0.0719 for all    4628 data
REM    290 parameters refined using      0 restraints

END

WGHT      0.0542    100.5195

REM Highest difference peak  1.599,  deepest hole -1.723,  1-sigma level  0.176
Q1    1   0.4324  0.4666  0.8773  11.00000  0.05    1.60
Q2    1   0.1195  0.3516  0.3768  11.00000  0.05    1.13
Q3    1   0.4179  0.0562  0.5192  11.00000  0.05    1.05
Q4    1   0.0801  0.5560  0.3560  11.00000  0.05    1.01
Q5    1   0.4981  0.2429  0.5613  11.00000  0.05    0.99
Q6    1   0.5329  0.4653  0.9541  11.00000  0.05    0.92
Q7    1   0.5254  0.1156  0.4917  11.00000  0.05    0.89
Q8    1   0.5002  0.1561  0.4107  11.00000  0.05    0.83
Q9    1   0.5253  0.2020  0.4881  11.00000  0.05    0.82
Q10   1   0.5000  0.5000  1.0000  10.50000  0.05    0.80
Q11   1   0.5000  0.0000  0.5000  10.50000  0.05    0.77
Q12   1   0.5812  0.1458  0.5079  11.00000  0.05    0.76
Q13   1   0.4991  0.6293  0.9406  11.00000  0.05    0.75
Q14   1   0.5523  0.0787  0.5177  11.00000  0.05    0.72
Q15   1   0.5385  0.2329  0.4194  11.00000  0.05    0.68
Q16   1   0.5384  0.0585  0.6133  11.00000  0.05    0.67
Q17   1   0.5293  0.0740  0.4056  11.00000  0.05    0.65
Q18   1   0.5554  0.2350  0.5250  11.00000  0.05    0.58
Q19   1   0.4990  0.1497  0.5341  11.00000  0.05    0.57
Q20   1   0.4827  0.4591  0.7602  11.00000  0.05    0.56
;
_shelx_res_checksum                65429
_shelx_hkl_file
;
  -4   0   0 7553.24  285.87
   6   0   0  216.08    9.20
  -6   0   0  215.68    9.20
  -8   0   0  680.83   27.00
 -10   0   0  234.68   10.70
 -12   0   0  123.89    7.10
 -14   0   0    0.90    1.60
 -16   0   0    0.90    2.00
 -18   0   0  638.94   27.80
 -20   0   0  659.63   29.10
 -22   0   0  153.88   11.50
  22   0   0  158.18   11.30
  24   0   0 1240.58   50.99
 -24   0   0 1225.58   51.79
 -26   0   0  850.31   39.00
  26   0   0  898.61   38.30
  -1  -1   0 2976.70  113.09
   3  -1   0 1965.90   70.09
  -3  -1   0 1771.92   67.99
  -3  -1   0 1739.13   68.59
   3   1   0 1696.83   67.79
   3   1   0 1825.92   69.39
  -3   1   0 1739.53   67.99
  -5  -1   0 1854.71   69.59
  -5  -1   0 1877.31   70.09
  -5   1   0 1812.72   69.49
   5   1   0 1815.42   69.39
   5   1   0 1723.83   70.79
  -5   1   0 1843.52   73.99
  -7  -1   0 1540.25   59.29
  -7  -1   0 1583.34   59.49
   7   1   0 1505.15   60.29
  -7   1   0 1525.15   59.19
  -9  -1   0  234.28   10.20
  -9  -1   0  219.38   10.10
  -9   1   0  223.78   10.10
   9   1   0  218.38   10.90
 -11  -1   0   86.59    5.20
 -11  -1   0   70.79    5.10
  11   1   0   76.69    5.60
 -11   1   0   71.29    5.00
 -13  -1   0   37.40    4.60
 -13  -1   0   51.69    4.40
 -13   1   0   43.50    4.50
  13   1   0   46.40    4.80
 -15  -1   0   31.10    4.80
 -15  -1   0   40.50    4.60
 -15   1   0   33.90    4.80
  15   1   0   29.00    5.00
 -17  -1   0  184.28   10.70
  17   1   0  184.28   10.30
 -17   1   0  188.38   10.80
  17   1   0  188.08   11.10
 -19  -1   0 1117.89   46.10
 -19   1   0 1101.69   46.00
  19   1   0 1141.09   45.50
 -21  -1   0  180.68   12.20
 -21   1   0  184.58   12.10
  21   1   0  187.68   11.90
 -23  -1   0  460.95   22.60
  23   1   0  463.05   21.90
 -23   1   0  442.16   22.50
 -25  -1   0  304.57   17.80
  25   1   0  330.17   17.30
 -25   1   0  288.97   17.80
  27  -1   0  418.06   21.90
 -27  -1   0  428.46   22.80
 -27   1   0  400.06   22.70
  27   1   0  425.66   22.00
   0  -2   0 2224.58   87.09
   0   2   0 2362.76   88.19
   0   2   0 2238.58   86.19
   2  -2   0 1174.08   49.10
  -2  -2   0 1234.78   49.90
   2   2   0 1235.88   48.70
  -2   2   0 1385.46   50.09
   2   2   0 1410.86   51.29
  -2   2   0 1235.18   48.80
  -4  -2   0  941.41   37.20
  -4  -2   0  954.60   35.90
  -4   2   0  937.61   35.90
   4   2   0  886.41   35.60
  -6  -2   0  173.68    9.20
  -6  -2   0  174.38    7.80
  -6   2   0  166.18    7.80
   6   2   0  176.78    7.60
  -8  -2   0  448.06   18.50
  -8  -2   0  431.26   17.40
  -8   2   0  406.16   17.40
   8   2   0  406.26   17.10
 -10  -2   0 1464.45   56.39
 -10  -2   0 1455.15   55.79
 -10   2   0 1434.76   55.79
  10   2   0 1404.16   55.29
  10   2   0 1405.96   57.59
 -12  -2   0 1242.78   47.60
 -12  -2   0 1171.98   47.10
  12   2   0 1142.79   48.60
  12   2   0 1158.28   46.60
 -12   2   0 1248.68   58.29
 -12   2   0 1199.68   47.20
 -14  -2   0 1706.03   65.09
 -14  -2   0 1746.23   65.09
 -14   2   0 1449.76   75.69
  14   2   0 1636.64   66.29
 -14   2   0 1692.33   65.09
  14   2   0 1710.23   64.49
 -16  -2   0  757.62   31.30
 -16  -2   0  762.22   31.00
 -16   2   0  743.33   31.30
 -16   2   0  700.23   45.90
  16   2   0  755.92   32.50
  16   2   0  769.02   30.80
  18   2   0   21.50    3.50
  18   2   0   19.70    4.20
 -18   2   0   25.50    3.70
 -18   2   0   33.00   12.50
 -20  -2   0  274.87   15.10
  20   2   0  289.87   14.80
 -20   2   0  274.17   15.20
 -20   2   0  301.77   35.70
 -22  -2   0   10.40    3.60
 -22   2   0   -3.20   12.20
  22   2   0    8.90    3.50
 -22   2   0    4.60    3.40
 -24  -2   0    5.20    4.00
  24   2   0    9.70    3.90
 -24   2   0    3.20    3.90
 -24   2   0   -2.30   14.00
 -26  -2   0   -0.20    4.20
 -26   2   0   -4.50    3.90
  26   2   0   -5.60    3.90
 -26   2   0   -3.70   14.70
   1  -3   0 3959.20  153.48
  -1  -3   0 4638.04  157.88
  -1  -3   0 3893.41  153.88
   1   3   0 3997.00  155.38
  -1   3   0 3990.30  154.78
   1   3   0 3878.11  152.38
  -1   3   0 3838.12  152.48
   3  -3   0 1097.69   44.90
  -3  -3   0 1085.69   45.90
  -3   3   0 1174.18   46.00
  -3   3   0 1291.97   50.69
   3   3   0 1119.09   44.20
   3   3   0 1201.78   47.80
  -3   3   0 1109.99   44.40
  -5  -3   0   65.09    3.80
  -5  -3   0   59.99    5.80
   5   3   0   61.39    3.50
   5   3   0   61.69    6.70
  -5   3   0   63.19    3.80
  -7  -3   0 1580.64   60.59
   7  -3   0 1529.65   65.79
  -7  -3   0 1594.84   62.19
   7   3   0 1558.54   60.19
   7   3   0 1600.54   63.99
  -7   3   0 1542.95   60.59
  -9  -3   0 2146.19   82.59
  -9  -3   0 2184.78   83.99
   9   3   0 2136.49   82.09
  -9   3   0 2117.79   82.59
 -11  -3   0 3209.18  123.49
 -11  -3   0 3260.87  122.49
 -11   3   0 3215.68  122.49
  11   3   0 3153.18  125.29
  11   3   0 3134.29  121.89
 -13  -3   0 1904.21   73.79
 -13  -3   0 1885.01   72.89
  13   3   0 1834.02   75.39
 -13   3   0 1883.01   72.99
  13   3   0 1839.12   72.29
 -15  -3   0 1298.97   51.89
 -15  -3   0 1291.67   51.39
  15   3   0 1301.87   50.79
 -15   3   0 1274.57   51.49
  15   3   0 1270.37   53.69
 -17  -3   0  425.46   19.20
 -17  -3   0  402.26   19.30
  17   3   0  424.86   21.30
  17   3   0  416.26   18.50
 -17   3   0  407.66   19.30
 -19  -3   0  138.29   10.00
  19   3   0  139.79    9.70
  19   3   0  154.88   12.00
 -19   3   0  143.89   10.10
 -21  -3   0   -0.50    3.30
 -21   3   0    3.40   12.60
  21   3   0    3.00    3.30
 -21   3   0    6.00    3.50
 -23  -3   0  190.48   13.10
 -23   3   0  190.28   13.10
  23   3   0  190.48   12.50
 -25  -3   0  305.77   17.90
  25   3   0  313.07   17.10
 -25   3   0  311.57   18.10
 -27  -3   0   84.09   11.30
 -27   3   0   94.59   11.70
  27   3   0  104.49   10.90
   0  -4   0  710.53   30.20
   0   4   0  674.43   28.50
   0   4   0  823.62   32.30
   2  -4   0  415.46   18.40
  -2  -4   0  401.46   19.00
  -2   4   0  482.75   20.00
  -2   4   0  398.26   17.10
   2   4   0  402.76   17.00
   2   4   0  467.15   21.10
   4  -4   0  364.56   16.30
  -4  -4   0  367.76   17.80
   4   4   0  356.56   15.40
  -4   4   0  425.76   22.60
   4   4   0  398.16   19.70
  -4   4   0  366.76   15.70
  -4   4   0  398.96   17.50
  -6  -4   0   45.20    6.20
  -6  -4   0   51.89    3.80
   6   4   0   53.99    7.80
   6   4   0   40.50    3.30
  -6   4   0   47.10    3.60
 -10  -4   0 1291.87   52.89
  10  -4   0 1453.15   58.79
 -10  -4   0 1280.37   50.99
  10   4   0 1241.18   50.49
 -10   4   0 1246.78   51.09
 -12  -4   0 1377.56   54.79
 -12  -4   0 1367.16   56.49
 -12   4   0 1587.34   71.99
  12   4   0 1367.36   58.59
  12   4   0 1323.27   54.19
 -12   4   0 1345.67   54.89
 -14  -4   0 1236.78   48.50
 -14  -4   0 1256.57   50.09
 -14   4   0 1191.68   48.50
  14   4   0 1229.18   52.19
  14   4   0 1222.98   47.80
 -14   4   0 1143.49   64.89
 -16  -4   0  264.57   14.70
 -16  -4   0  259.07   13.30
  16   4   0  258.77   16.40
 -16   4   0  248.18   13.30
  16   4   0  263.97   12.70
 -18  -4   0   71.39    8.50
 -18  -4   0   66.49    7.50
  18   4   0   76.09   10.10
  18   4   0   62.99    7.00
 -18   4   0   76.19    7.60
 -20  -4   0   13.30    3.80
  20   4   0   11.40    3.50
 -20   4   0   16.80    3.70
 -20   4   0   22.70   13.90
  20   4   0   16.20    5.20
 -22  -4   0   60.09    8.80
 -22   4   0   75.89    9.00
  22   4   0   72.79    8.60
 -24  -4   0  203.78   14.10
  24   4   0  209.68   13.40
 -24   4   0  217.18   14.40
 -26  -4   0  181.18   14.00
  26   4   0  212.78   13.60
 -26   4   0  191.18   14.50
  -1  -5   0   43.90    6.00
   1  -5   0   40.70    5.60
  -1   5   0   47.90    3.60
   1   5   0   56.79    7.30
   1   5   0   47.80    3.70
  -1   5   0   55.69    6.90
  -3  -5   0   15.30    5.80
  -3  -5   0   18.20    3.50
   3   5   0   23.00    4.40
  -3   5   0   31.20    5.30
   5  -5   0   31.70    4.40
  -5   5   0   30.20    3.20
  -5   5   0   28.70    9.60
  -5   5   0   28.40    4.80
   5   5   0   30.70    3.20
  -7  -5   0  102.79    9.10
  -7   5   0   95.09    6.00
   7   5   0   93.19   10.70
   7   5   0  113.69    5.70
  -9  -5   0   68.49    5.10
   9   5   0   69.69    4.60
   9   5   0   56.79    8.90
  -9   5   0   57.39    4.90
 -11  -5   0   44.90    4.60
 -11  -5   0   46.20    7.40
 -11   5   0   36.60    4.50
  11   5   0   28.50    5.50
 -11   5   0   33.60    9.90
  11   5   0   44.30    4.20
 -13  -5   0   44.50    7.90
 -13  -5   0   45.00    5.20
 -13   5   0   39.20    5.10
  13   5   0   49.70    5.00
  13   5   0   51.59    9.10
 -15  -5   0    1.40    2.30
 -15  -5   0   -0.30    3.40
 -15   5   0    3.20   10.20
  15   5   0   -1.30    2.10
  15   5   0    3.90    3.90
 -15   5   0   -1.30    2.10
 -17  -5   0   12.40    4.20
 -17  -5   0    8.10    3.10
 -17   5   0   10.10    3.10
  17   5   0   10.30    4.70
 -17   5   0   25.80   12.90
  17   5   0    9.60    3.00
 -19  -5   0   -0.10    3.60
 -19  -5   0    2.10    3.30
 -19   5   0    2.00    3.10
  19   5   0    0.20    4.40
  19   5   0    0.80    2.80
 -19   5   0   11.10   12.80
 -21  -5   0    3.80    3.40
  21   5   0   10.70    3.40
 -21   5   0    4.20   14.30
 -21   5   0    7.70    3.70
  21   5   0    8.40    7.00
 -23  -5   0   -1.10    3.50
 -23   5   0   -1.60    3.40
  23   5   0    2.90    3.40
 -23   5   0  -12.60   14.40
 -25  -5   0    4.80    4.00
 -25   5   0    2.40    4.00
  25   5   0    9.10    3.80
 -25   5   0  -10.70   15.00
   0  -6   0 1279.07   63.69
   0  -6   0 1268.97   50.19
   0   6   0 1149.19   47.90
   0   6   0 1251.67   52.09
   2  -6   0  534.15   23.70
  -2  -6   0  581.74   35.60
   2  -6   0  585.14   41.20
  -2  -6   0  528.55   24.30
   2   6   0  481.85   21.70
  -2   6   0  500.35   21.80
   2   6   0  551.54   26.40
  -2   6   0  576.54   25.50
  -4  -6   0   -3.40    2.60
   4  -6   0   -1.80    2.10
  -4  -6   0    3.50    6.40
  -4   6   0    0.00    2.30
  -4   6   0    2.60    1.30
   4   6   0   -3.60    2.90
   4   6   0    1.90    1.40
  -6  -6   0  213.98   13.60
   6  -6   0  221.18   11.20
  -6   6   0  236.48   12.50
  -6   6   0  245.68   19.40
   6   6   0  202.78   15.20
   6   6   0  235.28   10.40
  -6   6   0  237.78   10.80
  -8  -6   0  433.66   21.50
  -8   6   0  451.35   18.90
   8   6   0  437.56   18.30
  -8   6   0  435.26   29.90
 -10  -6   0 1014.10   43.10
 -10   6   0 1017.70   40.40
  10   6   0  988.00   39.70
 -12  -6   0 1673.73   67.19
 -12  -6   0 1692.23   64.49
 -12   6   0 1682.03   64.69
  12   6   0 1623.24   63.69
 -12   6   0 1483.55   80.39
  12   6   0 1684.73   70.29
 -14  -6   0 1578.74   64.89
 -14  -6   0 1552.24   62.19
 -14   6   0 1542.45   62.39
  14   6   0 1591.54   67.99
  14   6   0 1594.64   61.59
 -16  -6   0  491.15   22.70
 -16  -6   0  526.15   25.70
  16   6   0  525.05   22.20
 -16   6   0  486.65   23.00
  16   6   0  508.85   28.30
 -18  -6   0   67.89    7.60
 -18   6   0   57.39    7.90
  18   6   0   63.59    7.10
  18   6   0   70.19   12.10
 -20  -6   0    1.40    3.00
 -20   6   0   -6.90    3.10
 -20   6   0   -4.10   12.60
  20   6   0    2.30    2.80
  20   6   0   -3.20    4.90
 -22  -6   0   95.69    9.40
  22   6   0   90.49    8.60
 -22   6   0   65.29    9.60
 -24  -6   0   14.60    4.20
  24   6   0   13.80    3.90
 -24   6   0    9.70    4.60
  -1  -7   0  706.73   30.70
  -1  -7   0  729.83   46.10
   1  -7   0  707.83   30.40
   1  -7   0  770.02   48.30
   1   7   0  692.73   32.70
   1   7   0  673.73   28.20
  -1   7   0  709.93   32.30
  -1   7   0  674.03   28.30
   3  -7   0  198.98   11.30
  -3  -7   0  194.08   12.10
   3  -7   0  176.58   30.90
   3   7   0  184.58   13.50
  -3   7   0  204.08   12.70
   3   7   0  194.58    9.20
  -3   7   0  184.98    9.30
   5  -7   0  526.55   43.90
  -5  -7   0  541.25   24.90
   5  -7   0  530.15   23.00
  -5  -7   0  476.25   33.70
   5   7   0  539.15   21.60
  -5   7   0  539.55   24.60
  -5   7   0  523.45   21.90
  -7  -7   0  421.76   21.50
   7  -7   0  399.56   18.70
   7  -7   0  494.05   40.70
  -7   7   0  455.05   28.80
  -7   7   0  421.96   20.10
  -7   7   0  417.16   18.40
   7   7   0  403.06   17.90
   9  -7   0 1300.37   67.39
  -9  -7   0 1154.08   51.59
   9   7   0 1136.49   48.20
  -9   7   0 1366.06   61.79
  -9   7   0 1218.98   49.10
 -11  -7   0 1656.83   66.39
  11   7   0 1638.54   69.59
 -11   7   0 1438.36   76.89
 -11   7   0 1667.53   63.59
  11   7   0 1641.04   62.69
 -13  -7   0 1725.93   70.69
 -13   7   0 1705.33   67.79
  13   7   0 1674.73   66.79
  13   7   0 1753.42   74.09
 -15  -7   0  986.60   43.80
 -15  -7   0  979.20   40.60
  15   7   0  999.80   39.90
 -15   7   0  969.10   40.90
  15   7   0  999.90   47.30
 -17  -7   0  201.18   16.00
 -17  -7   0  230.88   12.90
 -17   7   0  222.78   13.30
  17   7   0  224.48   19.10
  17   7   0  246.18   12.30
 -19  -7   0   39.50    6.80
 -19   7   0   60.19    8.40
  19   7   0   47.30    8.90
 -21  -7   0   -8.70    4.50
 -21  -7   0    2.40    3.30
  21   7   0    1.90    2.90
  21   7   0   -7.00    5.20
 -21   7   0   -6.40    3.50
 -21   7   0   -0.20   12.60
 -23  -7   0    3.20    3.50
  23   7   0    5.80    3.40
 -23   7   0    2.10    4.00
 -23   7   0   -1.60   12.80
   0  -8   0  312.67   16.30
   0   8   0  302.97   13.70
  -2  -8   0  107.19    9.70
   2  -8   0   91.09   30.20
  -2  -8   0   82.69   27.90
   2  -8   0  137.29    9.40
  -2   8   0  123.79   10.30
   2   8   0  106.89   11.10
   2   8   0  108.69    6.80
  -2   8   0  113.69    6.70
  -4  -8   0  343.27   33.80
   4  -8   0  304.27   15.70
   4  -8   0  368.86   42.40
  -4  -8   0  287.37   17.00
  -4   8   0  299.37   14.00
   4   8   0  295.27   13.90
  -4   8   0  309.57   17.30
   6  -8   0  226.98   12.50
  -6  -8   0  233.98   14.50
   6   8   0  221.78   10.90
  -6   8   0  215.68   11.20
  -6   8   0  223.28   13.80
  -8  -8   0  219.28   14.80
   8  -8   0  196.18   12.00
   8   8   0  210.78   10.90
   8   8   0  226.88   17.20
  -8   8   0  240.58   15.60
  -8   8   0  254.67   24.40
  -8   8   0  206.78   11.40
 -10  -8   0  421.86   22.30
  10   8   0  404.46   24.70
 -10   8   0  459.05   32.60
  10   8   0  398.06   18.10
 -10   8   0  406.16   18.90
 -12  -8   0  539.05   27.50
 -12   8   0  550.04   24.30
  12   8   0  526.15   30.40
  12   8   0  543.55   23.40
 -12   8   0  596.14   39.30
 -14  -8   0  604.74   30.60
 -14   8   0  593.14   43.20
  14   8   0  662.83   26.40
 -14   8   0  624.64   27.20
  14   8   0  612.24   34.00
 -16  -8   0   97.69   13.40
 -16   8   0  129.19    9.70
  16   8   0  142.79    8.90
  16   8   0  109.79   15.90
 -18  -8   0   89.59   13.10
 -18   8   0  106.69    9.80
  18   8   0  122.19    9.00
  18   8   0  101.89   15.50
 -20  -8   0    5.20    5.70
  20   8   0   16.10    7.20
 -20   8   0   15.80    4.40
  20   8   0   19.80    3.80
 -22  -8   0   32.00    5.30
  22   8   0   26.50    8.20
 -22   8   0   31.70    5.30
  22   8   0   32.20    4.60
  -1  -9   0 1101.09   70.29
   1  -9   0 1209.48   48.60
   1  -9   0 1175.28   73.49
  -1  -9   0 1193.78   48.80
  -1   9   0 1241.38   50.99
   1   9   0 1110.09   46.00
  -1   9   0 1135.49   46.20
  -3  -9   0 1250.67   50.59
  -3  -9   0  999.90   67.69
   3  -9   0 1261.17   49.70
  -3   9   0 1269.97   51.79
  -3   9   0 1223.88   47.80
   3   9   0 1206.88   47.60
  -5  -9   0  748.23   32.40
   5  -9   0  606.74   57.49
   5  -9   0  723.83   30.70
  -5   9   0  692.83   29.10
  -5   9   0  731.33   32.50
   5   9   0  703.03   28.90
  -7  -9   0  181.58   13.60
   7  -9   0  180.58   11.70
   7  -9   0  167.28   40.40
   7   9   0  172.38   15.50
   7   9   0  171.58    9.80
  -7   9   0  181.38   13.30
  -7   9   0  171.78   10.00
  -9  -9   0   16.30    5.30
   9   9   0   21.00    3.00
  -9   9   0   18.90    3.30
   9   9   0   14.00    5.70
 -11  -9   0   28.20    6.20
 -11   9   0   31.60    3.90
  11   9   0   30.90    7.60
 -13  -9   0   40.10    7.00
  13   9   0   35.40    8.00
  13   9   0   62.59    6.30
 -13   9   0   56.69    6.80
 -15  -9   0    8.00    5.70
  15   9   0   17.30    7.00
  15   9   0   17.70    3.20
 -15   9   0   11.60    3.40
 -17  -9   0   -5.90    5.00
  17   9   0   -1.90    6.00
 -17   9   0   -4.30    2.90
  17   9   0    1.40    2.90
 -19  -9   0  206.18   17.60
  19   9   0  241.38   21.60
 -19   9   0  242.28   14.60
 -21  -9   0  159.68   16.50
 -21   9   0  198.18   13.60
  21   9   0  189.68   20.60
   0 -10   0 2587.34  100.39
   0  10   0 2421.26   97.69
   0  10   0 2592.84  102.89
   2 -10   0 2013.40   78.99
  -2 -10   0 1978.10   79.49
   2  10   0 1923.41   76.59
   2  10   0 2003.90   82.19
  -2  10   0 1915.91   76.69
  -2  10   0 1983.70   81.09
  -4 -10   0  701.63   32.10
   4 -10   0  646.24   61.59
   4 -10   0  717.23   31.10
  -4 -10   0  674.03   55.19
   4  10   0  667.73   28.70
  -4  10   0  714.43   32.80
   4  10   0  699.93   34.70
  -4  10   0  677.13   28.70
   6 -10   0   69.09   20.50
  -6 -10   0   82.79   10.90
   6 -10   0   68.29    9.50
   6  10   0   72.79    7.20
   6  10   0   86.99   12.70
  -6  10   0   82.89   10.30
  -6  10   0   89.49    6.90
  -8 -10   0    5.70   13.00
  -8 -10   0   -7.70    4.30
  -8 -10   0    4.90   12.50
   8  10   0   -4.40    2.40
  -8  10   0   -1.50    2.10
   8  10   0   -7.40    4.70
 -10 -10   0  137.79   13.30
  10  10   0  134.39   15.30
 -10  10   0  152.58    9.50
  10  10   0  132.09   11.40
 -12 -10   0   24.60    6.20
  12  10   0   29.70    7.40
 -12  10   0   27.30    3.90
 -14 -10   0   50.59    7.90
 -14  10   0   64.69    7.50
  14  10   0   47.70    8.90
 -16 -10   0   -6.30    5.20
 -16 -10   0   18.50   18.10
 -16  10   0    5.30    3.40
  16  10   0    1.70    6.20
 -18 -10   0   -4.90    5.70
 -18  10   0   -1.10    3.30
  18  10   0   -1.30    6.40
 -20 -10   0  115.79   15.70
 -20  10   0  153.88   12.20
  20  10   0  134.49   19.50
   1 -11   0  681.23   31.60
  -1 -11   0  694.33   60.89
  -1 -11   0  660.63   31.70
   1 -11   0  735.63   63.89
   1  11   0  690.43   34.00
  -1  11   0  687.73   33.60
  -1  11   0  651.73   29.20
  -3 -11   0   68.09   11.00
   3 -11   0   79.79   10.80
  -3  11   0   79.99   11.00
   3  11   0   70.89   12.10
  -3  11   0   78.19    7.00
  -5 -11   0  269.57   17.60
   5 -11   0  268.67   16.40
  -5 -11   0  196.38   41.90
   5 -11   0  201.68   46.50
  -5  11   0  299.37   18.40
   5  11   0  293.17   20.10
  -5  11   0  268.27   13.50
  -7 -11   0  128.79   13.20
  -7 -11   0  105.09   35.50
   7  11   0  130.69   15.00
  -7  11   0  127.49    8.80
  -9 -11   0   -3.00    5.00
  -9  11   0    2.80    2.60
   9  11   0   -1.50    5.50
 -11 -11   0   15.10   14.70
 -11 -11   0   -3.60    5.10
 -11  11   0   -1.10    2.60
  11  11   0   -1.80    5.50
 -13 -11   0   11.20    6.40
  13  11   0   10.50    7.30
 -13  11   0   22.30    3.90
  15  11   0   -5.60    6.80
 -15  11   0    3.80    3.40
  17  11   0   -7.10    6.60
 -17  11   0   -1.30    3.30
   2 -12   0  114.39   12.20
  -2 -12   0  175.88   43.90
  -2 -12   0  109.19   12.50
   2  12   0  125.49   13.70
  -2  12   0  119.79   12.90
  -6 -12   0   -4.40    5.40
  -6 -12   0   14.70   16.50
   6  12   0    8.50    6.00
  -8 -12   0   97.99   13.60
   8  12   0  102.19   15.20
 -10 -12   0  150.78   16.00
  10  12   0  173.48   18.90
 -12 -12   0  109.59   14.90
  12  12   0  128.39   17.90
 -14 -12   0  215.48   18.90
  14  12   0  255.67   23.20
   1 -13   0  533.85   27.50
  -1 -13   0  533.95   27.90
   1  13   0  556.64   30.30
  -1  13   0  554.04   29.80
   3 -13   0  108.99   13.50
  -3 -13   0  122.89   13.90
  -3  13   0  151.68   21.30
   3  13   0  156.08   15.70
  -5 -13   0   30.20   20.10
  -7 -13   0   18.90   18.90
  -7 -13   0   10.20    6.40
   7  13   0   21.30    7.40
  -9 -13   0  265.47   19.80
   9  13   0  305.47   23.60
 -11 -13   0  151.88   16.30
  11  13   0  191.68   19.90
   0 -14   0  127.79   15.00
   0  14   0  163.08   16.80
   2 -14   0  241.88   26.00
  -2 -14   0  225.28   49.70
  -2 -14   0  230.48   18.50
   2 -14   0  274.07   52.59
   2  14   0  266.17   21.20
  -4 -14   0    7.70    6.60
   4  14   0   15.80    7.30
  -6 -14   0   26.90   19.30
   6  14   0   -1.90    6.40
  28   0  -1   -5.80    4.20
 -28   0   1   -1.20    4.40
  26   0  -1    0.50    3.80
 -26   0   1    3.30    4.30
 -24   0   1   -3.70    3.80
 -22   0   1   -1.30    3.40
 -18   0   1   -1.00    2.20
 -16   0   1    1.50    1.90
 -14   0   1    0.60    1.60
 -12   0   1   -3.50    1.20
 -10   0   1   -2.70    1.10
  -8   0   1   -0.20    0.80
  -6   0   1   -0.80    0.70
  -4   0   1    0.50    0.50
  -2   0   1   -4.80    0.60
  -2   0   1   -4.10    0.50
  -2   0  -1   -1.90    1.60
   2   0   1   -2.60    0.30
   2   0   1   -2.10    0.30
  -4   0  -1   -0.50    0.70
   4   0   1    0.50    0.60
  -6   0  -1    4.70    1.00
   6   0   1    2.50    0.90
  -8   0  -1    1.20    1.10
   8   0   1    2.00    1.10
 -10   0  -1    0.90    1.30
  10   0   1    3.30    1.20
 -12   0  -1   -2.50    1.40
  12   0   1   -1.00    1.30
 -14   0  -1   -2.40    1.70
 -16   0  -1    1.00    2.10
 -18   0  -1   -1.60    2.30
  20   0   1    3.90    3.20
 -20   0  -1    0.30    2.80
 -22   0  -1   -1.90    3.30
  22   0   1   -1.70    3.40
 -24   0  -1    0.40    4.00
  24   0   1    0.00    4.00
  26   0   1    2.40    4.30
 -26   0  -1   -1.40    4.30
 -27  -1   1   33.70    6.00
 -27   1   1   32.90    6.10
  27   1  -1   36.70    5.50
 -25  -1   1    5.10    3.90
 -25   1   1    0.60    4.00
  25   1  -1    9.10    4.00
 -23  -1   1   54.89    8.70
  23   1  -1   35.40    5.00
 -23   1   1   56.59    8.40
 -21  -1   1  448.66   21.40
 -21   1   1  437.66   21.40
  21   1  -1  460.35   20.90
 -19  -1   1 1043.10   43.10
 -19   1   1 1053.39   43.20
 -17  -1   1  811.42   33.20
 -17  -1   1  825.12   34.00
  17   1  -1  812.72   34.20
 -17   1   1  826.92   34.00
 -15  -1   1  950.00   38.60
 -15  -1   1  970.70   38.10
  15   1  -1  933.11   39.10
 -15   1   1  962.30   38.60
 -13  -1   1  443.36   19.00
 -13   1   1  447.56   19.00
  13   1  -1  443.96   20.00
 -11  -1   1  159.08    7.80
 -11  -1   1  153.28    8.30
 -11   1   1  157.28    7.80
  11   1  -1  156.08    9.40
  -9  -1   1  444.66   19.80
  -9  -1   1  455.25   19.00
   9   1  -1  510.35   21.60
  -7  -1   1 1618.04   64.59
  -7  -1   1 1695.93   63.79
  -7   1   1 1681.03   63.89
  -5  -1   1 7237.08  268.47
  -5  -1   1 6970.80  269.07
  -5   1   1 7108.69  268.87
  -3  -1   1   59.59    2.80
  -3  -1   1   59.19    3.30
  -3   1   1   63.09    3.00
  -1  -1   1    1.20    0.30
   1  -1  -1    1.40    0.60
  -1   1   1    1.30    0.30
  -1   1   1    0.70    0.30
  -1  -1  -1   78.59    3.60
   1   1   1   83.19    3.90
  -1   1  -1   67.49    3.30
   1   1   1   82.19    3.50
  -3  -1  -1   81.49    3.90
  -3  -1  -1   85.69    3.90
  -3   1  -1   76.79    3.70
   3   1   1   75.79    3.70
   3   1   1   80.39    4.30
  -5  -1  -1 1650.33   61.19
  -5  -1  -1 1596.84   61.19
  -5   1  -1 1564.14   61.09
   5   1   1 1577.04   61.69
   5   1   1 1572.84   60.99
  -7  -1  -1 2064.79   79.69
  -7  -1  -1 2178.38   79.59
   7   1   1 2057.09   79.39
   7   1   1 2065.19   80.19
  -7   1  -1 2029.70   79.59
  -9  -1  -1 1600.24   62.19
  -9  -1  -1 1705.73   61.89
   9   1   1 1587.94   62.59
  -9   1  -1 1564.64   62.09
   9   1   1 1562.34   61.79
 -11  -1  -1 1056.09   41.00
 -11   1  -1  920.31   47.10
  11   1   1 1071.49   41.30
  11   1   1 1059.59   40.60
 -11   1  -1 1043.20   40.90
 -13  -1  -1  108.49    7.20
  13   1   1  120.19    7.40
 -13   1  -1  117.89    7.30
  13   1   1  117.09    7.10
 -15  -1  -1    1.40    2.00
 -15   1  -1    4.20    2.30
  15   1   1    1.90    2.10
 -15   1  -1   10.00    8.20
  15   1   1    1.90    2.00
 -17  -1  -1  406.76   19.30
  17   1   1  420.36   18.90
 -17   1  -1  418.86   19.40
 -19  -1  -1  217.98   12.90
 -19   1  -1  217.68   12.90
  19   1   1  214.78   12.50
 -21  -1  -1  891.91   38.80
  21   1   1  917.51   38.20
 -21   1  -1  911.61   38.90
  23  -1   1   28.00    4.90
 -23  -1  -1   29.00    5.10
  23   1   1   25.90    4.80
 -23   1  -1   24.50    5.00
 -25  -1  -1    0.90    3.90
  25  -1   1   -2.50    3.90
  25   1   1    3.80    4.10
 -25   1  -1   -1.00    4.10
 -25   1  -1   -1.70   14.10
 -27  -1  -1   18.00    5.70
  27  -1   1   17.60    5.20
  27   1   1   17.80    5.30
 -27   1  -1   17.10    5.50
 -27   1  -1   -1.50   15.70
 -28  -2   1  134.39   12.90
  28   2  -1  138.49   12.30
 -28   2   1  133.59   13.10
 -26  -2   1   18.90    4.90
  26   2  -1   20.90    4.90
 -26   2   1    1.60   14.50
 -26   2   1   26.60    5.50
 -24  -2   1    3.40    3.80
 -24   2   1    6.90   13.90
 -24   2   1   12.30    4.30
  24   2  -1    4.20    3.90
 -22  -2   1   36.30    5.00
  22   2  -1   46.80    7.40
 -22   2   1   53.19    7.80
 -20  -2   1  586.44   25.70
  20   2  -1  570.14   25.10
 -20   2   1  574.54   25.90
 -18  -2   1 1761.22   71.99
 -18  -2   1 1872.21   72.49
 -18   2   1 1849.52   72.59
  18   2  -1 1887.11   71.89
  18   2  -1 1819.62   73.69
 -16  -2   1 1431.46   55.69
 -16  -2   1 1376.46   55.69
  16   2  -1 1387.16   57.29
 -16   2   1 1400.16   55.79
  16   2  -1 1424.06   55.19
 -14  -2   1  654.73   27.80
 -14  -2   1  672.43   27.40
 -14   2   1  672.83   27.50
  14   2  -1  655.33   26.90
  14   2  -1  654.43   29.60
 -12  -2   1  102.79    6.30
 -12  -2   1  101.29    7.50
 -12   2   1  106.89    6.40
  12   2  -1   96.69    5.90
  12   2  -1  111.69    9.20
 -12   2   1  128.39   13.60
 -10  -2   1  899.31   37.60
 -10  -2   1  929.01   36.30
 -10   2   1 1004.50   49.30
 -10   2   1  908.51   36.40
 -10   2   1  921.61   46.40
  10   2  -1  896.51   35.90
  10   2  -1  885.31   39.50
  -8  -2   1 1101.69   45.50
  -8  -2   1 1145.29   44.10
  -8   2   1 1124.89   44.30
   8   2  -1 1206.28   48.00
   8   2  -1 1118.99   43.80
  -6  -2   1 1768.72   66.29
  -6  -2   1 1649.13   67.59
   6   2  -1 1712.53   66.09
  -6   2   1 1750.42   66.49
   6   2  -1 1798.52   69.79
   4  -2  -1 3525.55  120.99
  -4  -2   1 2962.60  116.49
  -4  -2   1 2833.22  117.59
  -4   2   1 3398.16  122.09
  -4   2   1 2873.21  116.69
   4   2  -1 2860.11  116.39
  -2  -2   1  512.05   19.50
   2  -2  -1  451.15   18.70
  -2   2   1  476.05   19.10
  -2   2   1  483.85   18.80
   2   2  -1  477.55   18.40
   2  -2   1  728.43   28.50
  -2  -2  -1  762.32   29.20
  -2   2  -1  752.42   28.50
   2   2   1  701.03   28.50
   2   2   1  742.83   29.90
  -4  -2  -1 1040.70   38.60
  -4  -2  -1  987.90   38.00
   4   2   1  949.60   37.70
  -4   2  -1  960.10   37.80
   4   2   1  960.40   39.20
  -6  -2  -1 6208.48  220.48
  -6  -2  -1 5761.42  219.98
  -6   2  -1 5639.94  219.78
   6   2   1 5757.32  219.68
   6   2   1 5641.34  221.28
  -8  -2  -1 3930.21  141.69
  -8  -2  -1 3722.03  141.29
  -8   2  -1 3593.64  141.09
   8   2   1 3615.84  142.59
   8   2   1 3670.43  140.89
 -10  -2  -1 1328.07   52.99
 -10  -2  -1 1413.56   53.29
 -10   2  -1 1474.55   63.69
  10   2   1 1303.97   54.19
  10   2   1 1321.17   52.59
 -10   2  -1 1291.47   52.89
 -12  -2  -1 1586.34   61.69
 -12  -2  -1 1666.03   61.69
  12   2   1 1569.24   61.19
  12   2   1 1600.84   62.89
 -12   2  -1 1597.54   61.69
 -12   2  -1 1425.76   71.79
 -14  -2  -1   66.19    5.90
  14   2   1   62.49    5.50
 -14   2  -1   67.69    5.90
  14   2   1   54.69    6.90
 -14   2  -1   56.49   11.70
 -16  -2  -1   22.60    3.40
  16   2   1   21.60    4.00
 -16   2  -1   29.30   11.30
 -16   2  -1   25.10    3.40
  16   2   1   22.40    3.10
 -18  -2  -1 1038.80   43.00
 -18   2  -1 1034.30   43.00
  18   2   1 1049.09   42.40
 -20  -2  -1  141.59   10.50
 -20   2  -1  139.69   10.50
  20   2   1  132.49   10.00
 -22  -2  -1  337.77   18.50
  22   2   1  362.26   18.10
 -22   2  -1  349.77   18.70
 -24  -2  -1   -2.40    3.70
 -24   2  -1   -1.10    3.80
  24   2   1    0.00    3.70
 -24   2  -1   -4.40   13.70
 -26  -2  -1    9.30    5.00
  26  -2   1   11.20    4.80
 -26   2  -1   12.20    4.90
 -26   2  -1   -4.90   15.50
  26   2   1   11.10    4.80
 -27  -3   1    4.60    4.50
 -27   3   1    6.40    4.40
  27   3  -1    6.20    4.20
 -27   3   1  -12.30   14.60
 -25  -3   1    5.80    4.20
 -25   3   1   -0.30   14.10
  25   3  -1    7.00    4.00
 -25   3   1   12.50    4.40
 -23  -3   1   -3.90    3.30
 -23   3   1    1.80    3.40
  23   3  -1    0.30    3.20
 -23   3   1   -6.50   12.80
 -21  -3   1   23.60    4.10
 -21   3   1   22.80    4.00
  21   3  -1   26.00    3.80
 -19  -3   1   24.70    3.70
 -19  -3   1   36.50    6.70
 -19   3   1   30.00   12.60
  19   3  -1   20.80    4.50
 -19   3   1   19.90    3.80
  19   3  -1   20.40    3.30
 -17  -3   1  247.98   12.90
 -17  -3   1  249.78   13.80
  17   3  -1  269.37   15.70
 -17   3   1  250.87   13.20
  17   3  -1  255.37   12.40
 -15  -3   1  239.88   13.20
 -15  -3   1  238.58   12.00
 -15   3   1  225.88   12.00
  15   3  -1  257.87   15.40
  15   3  -1  249.97   11.60
 -13  -3   1  100.29    8.60
 -13  -3   1  108.79    6.70
  13   3  -1   92.69   10.40
 -13   3   1  107.59    6.80
  13   3  -1  106.79    6.30
 -11  -3   1  876.01   36.80
 -11  -3   1  902.01   35.00
  11   3  -1  883.01   34.50
 -11   3   1  869.51   35.10
  11   3  -1  849.81   39.00
  -9  -3   1  445.46   21.30
   9  -3  -1  517.45   25.90
  -9  -3   1  466.25   19.20
   9   3  -1  429.36   18.70
  -9   3   1  445.86   19.30
   9   3  -1  513.05   24.30
  -7  -3   1    5.00    1.20
  -7   3   1    6.40    1.30
   7   3  -1    5.90    1.10
   7   3  -1    8.10    3.40
  -7   3   1    1.10    4.80
  -5  -3   1  223.08    9.50
   5  -3  -1  219.08   16.30
  -5  -3   1  198.58   11.40
  -5   3   1  229.28   16.50
   5   3  -1  246.48   13.80
  -5   3   1  227.48    9.80
   5   3  -1  227.08    9.30
   3  -3  -1 1358.66   53.29
  -3  -3   1 1380.56   54.59
  -3   3   1 1383.46   53.99
  -3   3   1 1490.75   57.69
  -3   3   1 1376.56   53.29
   3   3  -1 1341.47   52.89
  -1  -3   1  337.27   20.20
  -1  -3   1  391.86   16.20
   1  -3  -1  398.56   15.80
   1  -3  -1  357.46   23.50
  -1   3   1  382.76   16.70
   1   3  -1  373.36   14.80
  -1   3   1  395.26   15.20
  -1  -3  -1  428.16   17.30
   1  -3   1  409.16   16.90
   1   3   1  410.76   18.30
  -1   3  -1  358.66   20.50
  -1   3  -1  421.66   16.10
   1   3   1  401.06   16.30
   3  -3   1  815.62   31.90
  -3  -3  -1  845.52   33.00
  -3   3  -1  828.12   31.70
   3   3   1  793.72   31.70
   3   3   1  799.42   34.00
  -5  -3  -1  398.26   16.60
  -5  -3  -1  364.36   15.40
   5   3   1  376.26   17.70
   5   3   1  356.06   15.10
  -5   3  -1  362.86   15.20
  -7  -3  -1  714.13   28.50
  -7  -3  -1  764.92   29.70
   7   3   1  688.53   28.10
  -7   3  -1  691.63   28.30
   7   3   1  700.83   30.80
 -11  -3  -1  139.49    8.70
 -11  -3  -1  131.99    7.50
  11   3   1  132.89    9.80
  11   3   1  135.59    7.10
 -11   3  -1  126.29    7.40
 -11   3  -1   97.59   23.70
 -13  -3  -1  429.56   19.40
 -13  -3  -1  468.75   20.10
  13   3   1  434.26   21.50
 -13   3  -1  422.86   19.30
  13   3   1  441.46   18.80
 -15  -3  -1   79.69    7.30
 -15  -3  -1   64.99    6.30
  15   3   1   69.69    6.00
 -15   3  -1   50.79    6.20
  15   3   1   60.39    8.10
 -17  -3  -1   15.20    3.20
  17   3   1   16.90    3.00
  17   3   1   16.40    4.10
 -17   3  -1    6.70   11.40
 -17   3  -1   10.80    3.10
 -19  -3  -1    4.30    3.10
 -19   3  -1    5.80    3.20
 -19   3  -1    7.80   12.60
  19   3   1    0.20    2.90
 -21  -3  -1   -1.00    3.10
  21   3   1   -0.70    3.00
 -21   3  -1   -5.30    3.00
 -21   3  -1   -2.70   12.90
 -23  -3  -1   -6.50    3.40
  23   3   1   -7.70    3.30
 -23   3  -1   -3.20    3.50
 -23   3  -1   -2.80   14.00
 -25  -3  -1    9.60    4.50
 -25   3  -1   -2.90   15.10
  25   3   1   14.20    4.60
 -25   3  -1   23.30    5.50
 -26  -4   1   89.59   10.30
  26   4  -1   93.29    9.70
 -26   4   1   75.19   10.50
 -24  -4   1   -4.80    3.30
 -24   4   1    0.70    3.60
 -24   4   1  -13.00   14.00
  24   4  -1    1.70    3.30
 -22  -4   1   11.00    3.90
  22   4  -1    8.60    3.40
 -22   4   1   -1.90   13.00
 -22   4   1   12.40    3.90
 -20  -4   1   94.99    8.80
 -20  -4   1   89.49    9.30
 -20   4   1  101.69    8.80
  20   4  -1   88.49    8.00
  20   4  -1  105.49   11.60
 -18  -4   1  223.28   12.60
 -18  -4   1  232.98   14.00
  18   4  -1  232.58   12.00
  18   4  -1  248.78   16.20
 -18   4   1  229.18   12.80
 -16  -4   1  482.75   21.50
 -16  -4   1  426.06   19.40
  16   4  -1  428.76   18.90
 -16   4   1  401.26   19.50
  16   4  -1  447.16   23.50
  14   4  -1    3.20    3.60
 -12  -4   1    5.50    3.00
 -12   4   1    6.70    7.60
  12   4  -1    7.50    3.90
 -10  -4   1  170.78    8.00
 -10  -4   1  152.88   10.70
  10   4  -1  149.99    7.40
 -10   4   1  140.29    8.00
   8  -4  -1 1781.22   69.59
  -8  -4   1 1498.05   63.49
  -8  -4   1 1512.45   61.19
   8   4  -1 1695.73   66.89
   8   4  -1 1513.45   60.79
  -8   4   1 1528.35   61.49
   6  -4  -1 1324.47   61.69
  -6  -4   1 1326.67   56.19
  -6   4   1 1561.64   62.49
   6   4  -1 1395.06   59.09
   6   4  -1 1380.46   53.79
  -6   4   1 1433.76   54.49
   4  -4  -1 2043.90   77.99
   4  -4  -1 1891.01   85.89
  -4  -4   1 2080.09   79.69
   4   4  -1 1859.41   81.69
  -4   4   1 2103.19   83.49
   4   4  -1 2086.39   77.39
  -4   4   1 2080.79   78.99
  -4   4   1 2115.19   77.99
  -2  -4   1 1212.38   47.90
   2  -4  -1 1328.67   57.19
   2  -4  -1 1182.68   47.00
   2   4  -1 1191.68   46.00
   2   4  -1 1142.99   49.80
  -2   4   1 1164.18   46.30
  -2   4   1 1172.78   48.10
   0  -4   1  240.58   11.30
   0  -4  -1  242.38   11.30
   0   4  -1  224.78    9.70
   0   4   1  229.68   10.00
   0   4   1  227.38   12.40
   2  -4   1    1.40    1.60
  -2  -4  -1    4.40    1.90
  -2   4  -1    2.00    2.80
   2   4   1    1.30    1.00
   2   4   1    4.10    2.20
   4  -4   1  205.38    9.60
  -4  -4  -1  211.58   11.10
  -4   4  -1  209.88    9.10
   4   4   1  197.38    9.00
   4   4   1  195.58   12.10
   6  -4   1   -0.60    6.50
  -6  -4  -1    5.30    1.50
  -6  -4  -1   -3.20    2.10
  -6   4  -1   -0.90    5.30
   6   4   1   -1.70    2.10
  -6   4  -1    0.70    1.00
  -8  -4  -1  136.39    9.20
  -8  -4  -1  127.79    7.00
   8   4   1  116.49   10.10
  -8   4  -1  129.39    6.80
   8   4   1  123.19    6.60
 -10  -4  -1  252.97   11.80
  10  -4   1  238.68   19.70
 -10  -4  -1  268.07   13.80
  10   4   1  247.78   11.30
 -10   4  -1  250.77   11.70
  10   4   1  235.78   14.90
 -12  -4  -1    2.80    2.90
 -12  -4  -1    2.30    1.90
 -12   4  -1    9.10   10.20
  12   4   1   -0.30    3.00
  12   4   1    2.20    1.70
 -12   4  -1    0.60    1.80
 -14  -4  -1   37.30    5.30
 -14  -4  -1   40.20    6.90
  14   4   1   30.90    4.60
 -14   4  -1   33.10   12.10
  14   4   1   21.30    4.70
 -16  -4  -1  344.07   16.70
 -16  -4  -1  360.66   17.60
 -16   4  -1  338.67   37.10
 -16   4  -1  343.87   16.90
  16   4   1  338.57   16.00
  16   4   1  349.17   19.60
 -18  -4  -1  953.80   39.90
  18   4   1  962.30   42.60
  18   4   1  963.10   39.00
 -18   4  -1  930.01   39.90
 -20  -4  -1  726.63   32.00
 -20   4  -1  718.73   32.00
  20   4   1  728.13   31.00
 -22  -4  -1  225.58   14.90
  22   4   1  250.77   14.30
 -22   4  -1  248.58   15.10
 -24  -4  -1  126.29   12.00
 -24   4  -1  141.79   12.30
  24   4   1  151.48   11.50
 -26  -4  -1    1.30    4.50
 -26   4  -1    3.00    4.50
 -26   4  -1  -15.40   15.30
  26   4   1    5.30    4.10
 -25  -5   1   26.60    4.90
 -25   5   1   29.30    5.40
  25   5  -1   29.00    4.40
 -25   5   1   12.60   15.90
 -23  -5   1   -2.40    3.20
 -23   5   1   -4.70    3.30
 -23   5   1   -9.60   14.00
  23   5  -1    0.00    3.00
 -21  -5   1  160.78   11.10
 -21  -5   1  140.89   12.70
 -21   5   1  161.18   11.70
  21   5  -1  175.18   10.50
  21   5  -1  163.08   15.10
 -19  -5   1  688.73   29.60
 -19  -5   1  676.53   31.20
 -19   5   1  655.63   29.80
  19   5  -1  688.53   28.70
  19   5  -1  697.03   34.20
 -17  -5   1  845.32   37.70
 -17  -5   1  867.81   35.90
  17   5  -1  893.81   40.90
  17   5  -1  855.41   35.10
 -17   5   1  855.11   36.10
 -15  -5   1  250.67   15.00
 -15  -5   1  257.97   12.60
  15   5  -1  240.78   11.80
  15   5  -1  268.37   17.80
 -15   5   1  243.78   12.70
 -15   5   1  219.38   30.10
 -13  -5   1    8.00    3.50
 -13  -5   1    6.20    2.00
 -13   5   1    3.40    8.00
  13   5  -1    4.50    1.80
 -13   5   1    4.50    2.10
  13   5  -1    4.80    3.80
 -11  -5   1  104.69    6.20
 -11  -5   1   99.49    9.10
  11   5  -1   99.79    5.70
 -11   5   1   92.99    6.30
  11   5  -1   69.29   10.00
  -9  -5   1 1228.58   48.70
  -9  -5   1 1213.08   45.80
   9  -5  -1 1036.50   54.39
   9   5  -1 1182.98   45.30
   9   5  -1 1187.08   51.49
  -9   5   1 1230.18   46.10
  -9   5   1 1077.09   56.69
   7  -5  -1 2614.34  101.39
  -7  -5   1 2153.88   92.19
   7   5  -1 2150.38   89.39
  -7   5   1 2561.54   99.19
  -7   5   1 2233.98   90.09
   7   5  -1 2358.96   95.49
  -5  -5   1 2229.38   89.69
   5  -5  -1 2197.68   87.69
   5   5  -1 2247.98   86.99
  -5   5   1 2253.77   87.59
  -5   5   1 2482.15   95.09
  -5   5   1 2283.17   88.89
   3  -5  -1 1786.42   69.59
  -3  -5   1 1813.02   70.79
  -3   5   1 1772.92   68.79
   3   5  -1 1795.22   68.39
  -3   5   1 1775.12   70.99
  -1  -5   1 1178.28   47.60
   1  -5  -1 1176.18   47.20
   1   5  -1 1133.89   45.50
   1   5  -1 1306.17   50.39
  -1   5   1 1110.89   48.50
  -1   5   1 1189.58   45.90
  -1  -5  -1  533.35   36.00
   1  -5   1  646.94   26.40
  -1  -5  -1  631.64   26.70
   1   5   1  668.83   25.00
  -1   5  -1  639.94   24.70
   1   5   1  601.44   28.10
   5  -5   1  150.68    8.10
   5  -5   1  137.29   24.10
  -5  -5  -1  151.78   10.00
   5   5   1  137.59   10.90
  -5   5  -1  129.59   16.80
  -5   5  -1  131.69    9.30
   5   5   1  156.18    7.30
  -5   5  -1  163.38    7.40
  -7  -5  -1 4356.26  168.68
   7  -5   1 4783.02  181.08
  -7   5  -1 4213.68  166.38
  -7   5  -1 4546.75  179.88
   7   5   1 4169.88  166.08
   7   5   1 4153.08  170.58
  -9  -5  -1 1300.27   50.19
  -9  -5  -1 1236.08   47.80
  -9   5  -1 1007.30   60.39
   9   5   1 1227.28   47.20
  -9   5  -1 1245.88   47.70
   9   5   1 1228.18   52.09
 -11  -5  -1  571.34   25.50
 -11  -5  -1  530.75   23.00
 -11   5  -1  532.05   22.90
  11   5   1  532.95   22.40
  11   5   1  541.05   27.30
 -13  -5  -1  200.98   12.90
 -13  -5  -1  199.58   10.60
  13   5   1  196.78   10.10
 -13   5  -1  195.08   10.60
 -13   5  -1  181.38   30.10
  13   5   1  190.58   14.40
 -15  -5  -1  763.32   31.60
 -15  -5  -1  773.52   33.30
 -15   5  -1  621.14   50.59
  15   5   1  745.03   35.70
  15   5   1  770.42   30.80
 -15   5  -1  787.62   31.70
 -17  -5  -1 1171.18   48.70
 -17  -5  -1 1169.68   49.80
  17   5   1 1181.48   47.90
 -17   5  -1 1230.48   49.10
  17   5   1 1223.38   53.09
 -19  -5  -1  967.10   41.20
 -19   5  -1  985.30   41.50
  19   5   1  976.40   40.30
  19   5   1  996.00   45.30
 -21  -5  -1  692.53   31.80
 -21   5  -1  725.03   32.40
  21   5   1  730.43   31.00
 -23  -5  -1  183.68   13.20
  23   5   1  195.68   12.50
 -23   5  -1  178.68   13.50
 -25  -5  -1   90.59   10.40
  25   5   1  102.09   10.00
 -25   5  -1   66.59   10.80
 -24  -6   1   16.80    4.20
 -24   6   1   15.50   15.10
 -24   6   1   10.00    4.50
  24   6  -1   14.10    3.80
 -22  -6   1   -3.60    5.30
 -22  -6   1    2.10    3.10
 -22   6   1   -4.20    3.30
  22   6  -1    3.60    3.00
  22   6  -1   -2.40    5.40
 -22   6   1   -8.20   12.80
 -20  -6   1   41.90    6.40
 -20   6   1   63.49    8.00
  20   6  -1   48.40    8.20
 -18  -6   1  139.69    9.60
 -18  -6   1  126.49   12.20
 -18   6   1  127.89    9.90
  18   6  -1  133.39    8.70
  18   6  -1  143.79   14.80
 -16  -6   1   65.39    9.80
 -16  -6   1   64.09    6.90
  16   6  -1   77.39   11.80
 -16   6   1   50.19    6.70
 -16   6   1   93.59   27.20
  16   6  -1   55.59    6.20
 -14  -6   1    3.20    3.70
 -14  -6   1   -0.50    2.10
  14   6  -1   -1.90    2.00
  14   6  -1    0.20    4.20
 -14   6   1    0.50    2.10
 -14   6   1    4.20    9.10
 -12  -6   1   10.10    2.30
 -12  -6   1    4.70    3.70
  12   6  -1    3.00    1.90
  12   6  -1   -0.40    3.90
 -12   6   1    4.50    2.20
 -12   6   1   -3.70    7.50
  10  -6  -1   27.70    9.00
 -10  -6   1   33.80    5.10
  10   6  -1   42.40    4.10
  10   6  -1   54.69   10.20
   8  -6  -1  259.27   27.00
  -8  -6   1  270.77   15.50
  -8   6   1  294.47   22.10
   8   6  -1  258.37   18.00
  -8   6   1  282.67   12.70
   8   6  -1  274.67   12.00
   6  -6  -1 1641.44   65.79
  -6  -6   1 1654.53   68.09
  -6   6   1 1689.13   67.19
   6   6  -1 1770.72   71.49
   6   6  -1 1644.64   64.99
  -6   6   1 1674.13   65.69
  -6   6   1 1770.52   74.39
   4  -6  -1 1453.35   57.89
  -4  -6   1 1464.25   59.39
  -4   6   1 1420.16   56.99
   4   6  -1 1449.65   56.49
  -4   6   1 1437.96   59.29
   4   6  -1 1590.54   62.69
   2  -6  -1  703.43   29.50
  -2  -6   1  714.63   30.20
  -2   6   1  690.33   31.00
  -2   6   1  704.03   28.00
   2   6  -1  681.63   27.50
   0  -6  -1   12.30    3.10
   0  -6  -1    0.00    8.80
   0  -6   1    9.10    3.00
   0   6   1    9.80    3.30
   0   6   1    8.60    1.80
   0   6  -1   10.20    1.50
   2  -6   1   29.30   11.20
  -4  -6  -1   55.89    7.30
   4  -6   1   46.00    6.10
  -4   6  -1   66.89   11.30
   4   6   1   60.29    4.50
  -4   6  -1   80.29    8.00
   4   6   1   53.29    8.10
  -4   6  -1   58.19    4.30
  -6   6  -1   60.09    6.80
  -8  -6  -1  271.37   15.60
  -8   6  -1  301.87   12.90
   8   6   1  255.47   12.30
   8   6   1  268.07   17.40
 -10  -6  -1    3.20    3.60
  10   6   1    2.90    3.90
 -10   6  -1    0.70    8.00
 -10   6  -1    6.50    1.90
  10   6   1    6.60    1.90
 -12  -6  -1   12.00    2.80
 -12  -6  -1    9.60    4.30
  12   6   1    9.80    2.40
  12   6   1    8.50    5.10
 -12   6  -1   -2.00    9.60
 -12   6  -1   10.10    2.40
 -14  -6  -1   70.99   10.40
 -14  -6  -1   68.39    7.10
 -14   6  -1   80.59    7.10
  14   6   1   60.49   11.40
  14   6   1   50.79    6.70
 -16  -6  -1  123.99   12.10
 -16  -6  -1  123.79    9.60
  16   6   1  122.39    8.80
  16   6   1  132.29   14.40
 -16   6  -1  133.59    9.60
 -18  -6  -1  232.68   13.70
 -18  -6  -1  243.08   15.80
  18   6   1  240.48   18.60
  18   6   1  246.08   12.90
 -18   6  -1  238.38   14.00
 -18   6  -1  176.98   35.60
 -20  -6  -1  387.26   19.60
  20   6   1  404.06   18.80
 -20   6  -1  362.96   20.00
  20   6   1  392.96   24.80
 -22  -6  -1  226.88   14.40
 -22   6  -1  207.88   15.00
  22   6   1  249.58   13.70
 -24   6  -1   31.80    5.70
 -25   7   1    2.50   13.30
 -23  -7   1   14.90    4.20
  23   7  -1   19.90    4.00
 -23   7   1   18.00    4.40
 -23   7   1   10.10   13.20
  23   7  -1   20.50   10.20
 -21  -7   1   37.70    6.70
 -21  -7   1   53.49    8.00
 -21   7   1   34.80    5.20
  21   7  -1   43.50    8.50
 -19  -7   1  131.49   13.90
 -19  -7   1  166.28   10.70
  19   7  -1  128.89   16.30
  19   7  -1  170.18   10.00
 -19   7   1  143.39   10.90
 -17  -7   1   31.90    6.10
  17   7  -1   34.00    7.80
 -17   7   1   32.50    4.40
 -15  -7   1  215.38   15.70
 -15  -7   1  238.48   12.30
  15   7  -1  221.48   18.70
  15   7  -1  229.18   11.60
 -15   7   1  209.28   12.50
 -13  -7   1  125.69   12.00
  13   7  -1  136.09   14.60
 -13   7   1   94.39   22.80
 -13   7   1  102.79    8.50
  13   7  -1  124.69    7.50
 -11  -7   1   32.30    5.60
 -11   7   1   37.70    5.90
  11   7  -1   44.70    4.90
  11   7  -1   24.60    6.20
 -11   7   1   30.10    9.00
   9  -7  -1   13.30   10.20
  -9  -7   1   12.90    4.50
   9   7  -1   12.20    2.10
  -9   7   1   14.70    2.50
   9   7  -1    7.70    5.10
  -9   7   1   15.10    6.80
  -7  -7   1  119.99   10.80
   7  -7  -1  118.09    8.00
   7   7  -1  130.79    7.00
  -7   7   1  132.69    7.60
  -7   7   1  135.89    9.30
  -5  -7   1  461.25   22.20
   5  -7  -1  455.95   20.60
  -5   7   1  464.15   22.00
  -5   7   1  463.15   19.60
   5   7  -1  457.75   19.00
   3  -7  -1   76.79    7.50
  -3  -7   1   80.19    8.00
  -3   7   1   83.09    5.50
   3   7  -1   85.69    5.10
  -3   7   1   70.79    8.00
  -1  -7   1   15.20    9.80
   1  -7  -1   13.70   10.90
  -1  -7   1   21.50    3.70
   1  -7  -1   17.10    3.70
   1   7  -1   20.90    3.20
   1   7  -1   20.50    4.50
  -1   7   1   30.90    3.80
  -1   7   1   21.60    4.30
   1  -7   1  484.65   21.70
  -1  -7  -1  475.35   22.00
  -1   7  -1  459.45   19.30
   1   7   1  452.75   23.50
   1   7   1  466.15   19.50
   3  -7   1   20.70   11.40
  -3  -7  -1   28.30    4.40
   3  -7   1   25.80    3.80
   3   7   1   40.00    4.20
   3   7   1   26.20    4.80
  -3   7  -1   31.50    3.70
   5  -7   1 1012.10   65.29
   5  -7   1 1226.18   45.90
  -5  -7  -1 1188.88   47.60
  -5  -7  -1  972.00   57.39
   5   7   1 1114.79   49.70
  -5   7  -1 1167.58   44.60
   5   7   1 1146.49   44.30
  -5   7  -1 1220.98   54.49
  -5   7  -1 1083.59   47.20
   7  -7   1   17.90    3.00
  -7  -7  -1   14.50    4.20
   7  -7   1    7.50   12.70
   7   7   1   15.60    5.00
  -7   7  -1   18.70    6.50
   7   7   1   29.00    4.20
  -9  -7  -1  171.48   13.30
   9  -7   1  156.98   31.00
   9   7   1  153.78   14.70
   9   7   1  163.58    8.80
 -11  -7  -1   36.80    6.20
  11   7   1   37.80    7.10
  11   7   1   49.30    5.80
 -13  -7  -1  107.39   12.20
  13   7   1   90.79    7.50
  13   7   1   94.49   13.50
 -13   7  -1   88.69    8.10
 -15  -7  -1    5.30    4.90
 -15  -7  -1    7.60    3.30
 -15   7  -1    3.80    3.20
  15   7   1   11.50    3.00
  15   7   1    3.10    5.50
 -15   7  -1   -4.10   10.80
 -17  -7  -1    7.80    3.30
 -17  -7  -1   -0.90    4.70
 -17   7  -1    0.90   11.80
  17   7   1    6.60    2.80
 -17   7  -1    1.70    3.20
  17   7   1    7.50    6.20
 -19  -7  -1   11.80    5.30
 -19  -7  -1   20.70    4.10
  19   7   1   19.90    3.60
 -19   7  -1    4.80   12.70
  19   7   1   16.50    6.90
 -19   7  -1   13.00    4.20
 -21  -7  -1   68.29    8.70
  21   7   1   49.60    9.00
 -21   7  -1   41.90    5.90
 -23  -7  -1    2.90    3.80
 -23   7  -1   -8.60   12.90
 -23   7  -1   -4.20    3.80
  23   7   1    1.30    3.40
 -22  -8   1   65.09   12.20
 -22   8   1   86.69    9.80
  22   8  -1   94.89   15.40
 -20  -8   1  293.67   20.30
 -20  -8   1  278.67   19.40
  20   8  -1  308.27   23.20
 -20   8   1  299.67   16.80
  20   8  -1  308.47   15.60
 -18  -8   1  794.52   37.70
  18   8  -1  845.72   33.30
 -18   8   1  794.62   34.50
 -18   8   1  721.53   51.39
  18   8  -1  813.72   41.70
 -16  -8   1  503.05   27.90
 -16   8   1  550.04   25.00
  16   8  -1  587.14   23.90
 -16   8   1  566.44   41.40
  16   8  -1  550.14   32.00
 -14  -8   1  322.67   20.40
  14   8  -1  364.36   16.10
  14   8  -1  342.07   24.00
 -14   8   1  391.96   32.90
 -14   8   1  334.27   17.10
 -12  -8   1   -1.90    4.40
  12   8  -1    3.90    2.20
 -12   8   1   -1.00    2.50
  12   8  -1    0.00    5.20
 -12   8   1   -3.50    7.70
 -10  -8   1   75.49   10.00
  10   8  -1   67.69    5.80
 -10   8   1   64.09    6.60
   8  -8  -1  670.43   29.10
   8  -8  -1  611.44   48.80
  -8  -8   1  710.13   32.00
   8   8  -1  682.13   28.20
  -8   8   1  750.52   31.20
  -8   8   1  701.93   29.10
   8   8  -1  757.32   35.70
  -6  -8   1  543.95   36.50
  -6  -8   1  483.75   24.40
   6  -8  -1  493.85   22.70
  -6   8   1  490.45   21.60
  -6   8   1  517.35   24.40
   6   8  -1  548.35   28.00
   6   8  -1  485.15   21.00
  -4  -8   1  703.83   32.00
   4  -8  -1  732.93   31.00
  -4  -8   1  729.93   45.30
   4  -8  -1  805.02   54.19
   4   8  -1  658.23   28.70
   4   8  -1  741.43   35.00
  -4   8   1  707.43   32.50
  -4   8   1  683.73   29.30
   2  -8  -1  554.74   23.90
   2  -8  -1  492.35   45.40
  -2  -8   1  460.85   39.30
  -2  -8   1  533.35   24.20
   2   8  -1  508.25   21.10
  -2   8   1  534.35   25.40
  -2   8   1  513.55   21.60
   2   8  -1  504.25   26.50
   0  -8  -1   52.29    7.90
   0  -8   1   50.69    7.30
   0   8  -1   58.49    4.50
   0   8   1   52.59    8.40
   0   8   1   49.80    5.10
   2  -8   1   22.40    3.80
  -2  -8  -1   19.20    4.30
   2   8   1   20.50    2.70
  -2   8  -1   27.00    3.70
   2   8   1   13.20    4.50
   4  -8   1  538.25   23.80
  -4  -8  -1  511.35   25.30
  -4   8  -1  585.44   26.00
   4   8   1  503.65   22.00
  -4   8  -1  507.35   22.00
   4   8   1  514.05   27.40
   6  -8   1 1321.47   82.19
  -6  -8  -1 1303.67   73.89
   6  -8   1 1678.83   59.59
  -6  -8  -1 1601.74   61.89
  -6  -8  -1 1276.87   74.99
  -6   8  -1 1617.54   58.49
  -6   8  -1 1606.74   61.29
  -6   8  -1 1272.87   80.29
   6   8   1 1601.04   58.19
   6   8   1 1546.55   64.49
  -8  -8  -1 1712.63   69.29
   8  -8   1 1735.23   70.09
   8   8   1 1620.74   65.39
  -8   8  -1 1692.13   78.09
   8   8   1 1605.54   71.79
  -8   8  -1 1714.93   66.09
 -10  -8  -1  724.63   33.50
 -10   8  -1  716.53   43.70
  10   8   1  683.23   28.90
 -10   8  -1  723.73   29.80
  10   8   1  662.83   35.70
 -12  -8  -1  134.49   13.90
 -12   8  -1  138.19    9.50
  12   8   1  144.49    8.90
  12   8   1  114.79   15.50
 -14  -8  -1    0.30    5.30
 -14   8  -1    0.90   10.30
 -14   8  -1    5.50    3.10
  14   8   1   11.40    2.90
  14   8   1    5.10    6.20
 -16  -8  -1  263.27   19.10
  16   8   1  299.97   14.80
 -16   8  -1  303.27   15.90
  16   8   1  285.37   22.50
 -18  -8  -1  355.16   22.40
 -18   8  -1  391.46   19.90
  18   8   1  390.36   18.60
  18   8   1  406.36   26.90
 -20  -8  -1  270.87   19.50
  20   8   1  294.07   23.50
  20   8   1  299.17   15.90
 -20   8  -1  309.17   17.30
 -22  -8  -1  107.79   10.80
  22   8   1  113.09   10.20
 -22   8  -1   97.19   11.00
  22   8   1  105.09   16.90
 -21  -9   1   94.79   14.00
  21   9  -1  117.69   17.20
 -21   9   1  107.79   31.50
 -21   9   1  117.49   10.90
 -19  -9   1  237.08   18.60
 -19   9   1  283.87   39.20
 -19   9   1  254.97   15.30
  19   9  -1  275.27   22.40
 -17  -9   1  333.57   21.30
  17   9  -1  354.66   25.10
 -17   9   1  343.97   18.00
 -17   9   1  387.26   50.79
 -15  -9   1  156.38   14.50
  15   9  -1  175.98   17.40
 -15   9   1  159.48   10.70
 -13  -9   1    7.10    5.00
  13   9  -1   11.00    2.90
 -13   9   1   13.40    3.10
  13   9  -1    4.10    6.10
 -11  -9   1   -7.70    4.30
 -11   9   1   -0.30    2.20
  11   9  -1   -8.50    4.80
  11   9  -1    0.90    2.20
  -9  -9   1  168.18   13.40
   9   9  -1  157.88    9.00
  -9   9   1  160.58    9.60
   7  -9  -1  364.76   18.70
  -7  -9   1  385.96   20.70
  -7   9   1  384.16   17.60
  -7   9   1  398.86   20.40
   7   9  -1  390.36   16.90
   5  -9  -1  431.46   46.20
   5  -9  -1  349.87   18.50
  -5  -9   1  388.66   38.70
  -5  -9   1  351.96   19.30
  -5   9   1  345.07   16.40
   5   9  -1  343.47   16.00
   5   9  -1  365.96   22.30
  -5   9   1  349.67   19.80
   3  -9  -1  710.73   31.20
  -3  -9   1  700.53   31.40
  -3  -9   1  691.23   50.59
   3  -9  -1  720.63   56.89
  -3   9   1  674.63   28.70
   3   9  -1  673.43   28.30
   3   9  -1  701.83   34.30
  -3   9   1  693.93   32.80
   1  -9  -1   14.80    4.80
  -1  -9   1   22.80    4.60
   1   9  -1   27.40    6.00
   1   9  -1   19.20    2.60
  -1   9   1   14.80    3.00
  -1   9   1   17.30    5.20
   1  -9   1   13.70   15.00
  -1  -9  -1   -0.90    4.20
   1  -9   1    5.50    3.70
  -1   9  -1   -1.90    3.90
   1   9   1    3.10    4.40
  -1   9  -1   -0.30    1.90
  -3  -9  -1  234.18   15.50
   3  -9   1  262.17   44.60
  -3  -9  -1  238.78   38.00
   3  -9   1  261.27   14.30
   3   9   1  222.38   16.90
   3   9   1  219.48   11.80
  -3   9  -1  215.98   11.40
  -3   9  -1  235.38   15.80
  -5  -9  -1  278.57   17.50
   5  -9   1  296.97   15.60
  -5  -9  -1  347.47   41.10
   5   9   1  265.17   13.70
  -5   9  -1  275.77   13.60
   5   9   1  275.37   19.20
  -7  -9  -1  278.97   38.30
   7  -9   1  238.28   14.90
  -7  -9  -1  252.17   16.60
   7   9   1  244.18   18.30
  -7   9  -1  248.88   12.60
   7   9   1  237.98   12.40
  -9  -9  -1  292.97   18.90
  -9  -9  -1  303.97   38.30
   9   9   1  293.37   14.30
   9   9   1  286.67   21.00
  -9   9  -1  323.27   15.00
 -11  -9  -1   21.10    6.30
 -11  -9  -1   11.60   14.40
  11   9   1   18.80    7.00
 -11   9  -1   22.20    3.60
  11   9   1   36.40    5.70
 -13  -9  -1   40.00    7.40
 -13   9  -1   65.09    7.20
  13   9   1   44.00    9.10
  13   9   1   70.29    6.70
 -15  -9  -1    9.50    5.70
  15   9   1   15.70    6.80
 -15   9  -1   16.30    3.70
  15   9   1   13.50    3.30
 -17  -9  -1  256.47   19.40
  17   9   1  286.37   15.10
 -17   9  -1  279.87   15.70
  17   9   1  279.07   23.10
 -19  -9  -1  206.38   18.00
  19   9   1  219.18   13.30
 -19   9  -1  230.18   14.40
  19   9   1  225.48   21.90
  21   9   1  144.19   20.30
  21   9   1  177.18   14.20
 -21   9  -1  168.58   13.30
 -20 -10   1   -8.00    5.60
 -20  10   1    0.50    3.80
  20  10  -1   -0.80    6.80
 -18 -10   1   -6.50    5.40
  18  10  -1    0.10    6.40
 -18  10   1    1.20    3.40
 -16 -10   1   18.60    6.20
  16  10  -1   26.30    7.90
 -16  10   1   27.20    4.30
 -14 -10   1    2.00    5.10
  14  10  -1    3.20    5.70
 -14  10   1    6.50    3.00
 -12 -10   1    6.70    4.80
  12  10  -1    8.30    5.90
 -12  10   1    8.50    3.00
 -10 -10   1   -4.30    4.30
 -10  10   1    3.70    2.50
  10  10  -1   -3.50    5.10
  -8 -10   1   55.29   10.20
   8  10  -1   46.90    8.00
   6 -10  -1   -0.80   16.50
  -6 -10   1    2.30    4.50
  -6 -10   1   19.00   14.00
  -6  10   1    1.00    2.20
   6  10  -1   -5.80    4.70
  -6  10   1   -3.40    3.50
   4 -10  -1   25.80   18.00
  -4 -10   1   13.50   15.30
  -4 -10   1   26.30    5.70
   4 -10  -1   26.20    5.70
  -4  10   1   29.80    6.20
   4  10  -1   22.70    5.10
   4  10  -1   19.30    6.10
  -2 -10   1    9.70   16.40
   0 -10   1   43.80   18.50
   0 -10   1   22.40    5.30
   0 -10  -1    8.50    5.90
   0  10  -1   18.80    3.00
   0  10   1   13.70    5.90
   0  10  -1   21.50    6.00
   0  10   1   17.60    3.40
   2 -10   1   27.20   18.30
  -2 -10  -1   32.90   17.20
  -2 -10  -1   41.20    6.90
  -2  10  -1   36.70    6.50
   2  10   1   53.99    7.10
  -2  10  -1   57.69    6.10
   2  10   1   45.80    7.80
   4 -10   1  100.29   10.30
  -4 -10  -1  103.29   12.40
  -4  10  -1  106.29    7.50
   4  10   1   91.09   13.20
  -4  10  -1   98.89   11.50
   4  10   1   96.89    8.10
  -6 -10  -1    4.70    5.00
   6 -10   1    3.40   16.10
   6 -10   1    1.60    4.10
  -6 -10  -1    9.90   14.70
   6  10   1    4.30    2.80
  -6  10  -1    7.30    2.40
   6  10   1    4.00    5.30
  -8 -10  -1   14.50   14.20
  -8 -10  -1   -5.70    4.50
  -8  10  -1    4.60    2.40
   8  10   1   -2.70    4.70
   8  10   1   -0.80    2.50
 -10 -10  -1   -3.70    4.50
 -10  10  -1    5.70    2.70
  10  10   1    4.80    2.70
  10  10   1    4.50    5.30
 -12 -10  -1    1.80    5.30
  12  10   1    3.10    5.50
  12  10   1    1.70    2.70
 -12  10  -1   -1.20    2.60
 -14 -10  -1   17.00    6.50
  14  10   1   19.00    7.40
  14  10   1   23.80    4.00
 -14  10  -1   24.80    4.20
 -16 -10  -1   -5.60    5.50
 -16  10  -1   11.30    3.70
  16  10   1   -0.90    6.50
 -18 -10  -1  -10.80    5.50
 -18  10  -1    0.20    3.60
  18  10   1   -9.10    6.30
 -17 -11   1  116.69   15.50
 -17 -11   1  115.59   33.20
 -17  11   1  155.18   11.30
  17  11  -1  157.28   19.40
 -15 -11   1  369.16   23.30
 -15  11   1  371.36   19.00
  15  11  -1  398.76   27.40
 -13 -11   1   14.70    6.40
 -13  11   1   24.70    3.90
  13  11  -1   16.80    7.30
 -11 -11   1    8.50   14.20
 -11 -11   1   -1.90    4.80
  11  11  -1   -0.30    5.60
 -11  11   1    5.10    2.80
  -9 -11   1  177.28   14.60
  -9  11   1  188.08   10.90
   9  11  -1  179.38   17.50
  -7 -11   1  266.67   41.30
  -7 -11   1  315.87   18.90
  -7  11   1  315.87   15.40
   7  11  -1  330.47   22.20
  -5 -11   1  602.34   29.90
   5 -11  -1  640.64   29.30
  -5  11   1  623.74   27.00
  -5  11   1  651.63   31.30
   3 -11  -1   21.50    5.50
  -3 -11   1   17.10   16.20
  -3 -11   1   23.70    5.50
   3 -11  -1   25.20   18.50
   3  11  -1   23.80    6.20
  -3  11   1   25.50    5.90
   1 -11  -1  190.18   15.00
  -1 -11   1  195.38   14.50
  -1 -11   1  224.68   45.80
   1 -11  -1  202.78   43.60
   1  11  -1  205.38   16.60
  -1  11   1  195.48   11.30
  -1  11   1  207.38   16.30
   1 -11   1   58.99   10.10
  -1 -11  -1   45.30    7.10
   1  11   1   62.59   11.80
  -1  11  -1   71.09   11.30
   1  11   1   67.09    7.20
  -3 -11  -1   86.19   12.10
   3 -11   1   83.29   10.50
   3 -11   1  147.29   44.70
   3  11   1   95.19   13.30
  -3  11  -1   95.09   11.60
   3  11   1   85.79    8.00
   5 -11   1  296.17   51.59
  -5 -11  -1  374.26   21.00
   5 -11   1  346.17   20.50
  -5 -11  -1  266.57   43.40
   5  11   1  354.56   16.90
   5  11   1  368.46   23.10
  -7 -11  -1  672.53   32.80
   7  11   1  692.83   35.90
  -7  11  -1  665.23   31.10
  -9 -11  -1  442.56   24.90
  -9  11  -1  459.95   21.40
   9  11   1  464.85   28.30
 -11 -11  -1  159.58   15.40
 -11 -11  -1  114.59   36.00
 -11  11  -1  178.88   11.00
  11  11   1  165.88   18.10
 -13 -11  -1   44.10    8.00
 -13  11  -1   64.19    7.70
  13  11   1   35.70    9.00
 -15  11  -1   -1.60    3.00
 -17 -11  -1   13.50    7.30
  17  11   1   13.30    8.80
 -17  11  -1   25.60    4.70
 -16 -12   1  129.09   16.00
 -16  12   1  149.19   11.30
  16  12  -1  144.29   19.60
 -14 -12   1  199.48   18.20
 -14 -12   1  220.18   39.90
 -14  12   1  225.78   13.70
  14  12  -1  234.28   22.30
 -12 -12   1   24.30   17.40
  12  12  -1  -10.70    6.30
 -12  12   1    0.10    3.00
 -10 -12   1    6.60    6.10
 -10 -12   1    6.50   17.40
  10  12  -1   13.20    7.70
  -8 -12   1  113.29   13.50
   8  12  -1  130.19   16.20
  -8  12   1  121.29    9.20
  -6 -12   1  409.66   23.00
   6  12  -1  430.36   26.10
  -6  12   1  400.46   19.90
  -4 -12   1  229.88   16.70
   4 -12  -1  308.97   47.00
   4 -12  -1  229.18   16.20
  -4 -12   1  292.47   48.50
   4  12  -1  261.77   19.50
  -4  12   1  253.67   17.90
   2 -12  -1   43.10   19.60
  -2 -12   1   15.20    5.30
   2 -12  -1   14.60    5.40
  -2 -12   1   35.80   17.90
  -2  12   1   18.90    5.70
   2  12  -1   20.00    6.20
   0 -12   1   27.30    5.70
   0 -12   1   36.80   19.60
   0 -12  -1   26.20    6.00
   0 -12  -1   23.60   17.20
   0  12   1   31.00    6.60
   0  12  -1   35.50    6.80
   2 -12   1   31.80   19.30
  -2 -12  -1   -3.10    5.00
  -2  12  -1    0.80    4.30
  -4 -12  -1  434.86   23.70
   4 -12   1  447.66   28.30
   4 -12   1  394.56   53.39
  -4 -12  -1  394.36   51.79
   4  12   1  441.96   26.20
  -6 -12  -1  195.08   42.20
  -6 -12  -1  276.67   18.40
   6  12   1  287.97   21.10
  -8 -12  -1  516.25   28.20
   8  12   1  556.94   32.00
 -10 -12  -1  219.48   18.00
 -10 -12  -1  157.68   41.20
  10  12   1  231.18   21.10
 -12 -12  -1  115.79   40.20
 -12 -12  -1   80.69   14.40
  12  12   1   88.49   16.90
 -14 -12  -1   -6.10    6.60
  14  12   1   -0.30    7.90
  13  13  -1   54.09   10.70
 -11 -13   1   -8.50    5.90
 -11 -13   1   27.90   18.70
  11  13  -1   -1.90    6.60
  -9 -13   1    3.20    6.20
  -9 -13   1   15.10   18.20
   9  13  -1    0.20    6.80
  -7 -13   1   15.10   18.50
   7  13  -1   -7.10    5.70
  -5 -13   1   31.90   21.50
  -5 -13   1    6.60    5.80
   5  13  -1    6.90    6.10
  -3 -13   1   40.30   22.00
  -1 -13   1   38.00   22.00
   1 -13   1  111.19   13.10
  -1 -13  -1   97.99   13.60
   1  13   1  120.69   14.80
  -1  13  -1  133.09   14.30
  -3 -13  -1  136.29   45.10
  -5 -13  -1   98.29   14.00
  -5 -13  -1  172.08   44.40
   5  13   1  117.29   15.70
  -7 -13  -1   26.20   18.10
   7  13   1   -1.00    6.00
  -9 -13  -1   -1.00    6.10
  -9 -13  -1   33.40   18.20
   9  13   1    3.20    6.80
 -11 -13  -1   29.40   17.20
 -11 -13  -1   19.50    7.30
  11  13   1   27.50    8.90
   8  14  -1  127.29   17.40
  -6 -14   1  248.48   19.60
   6  14  -1  297.87   22.90
  -4 -14   1  151.38   50.89
  -4 -14   1  111.49   15.00
   4  14  -1  124.19   17.00
   2 -14  -1   38.00    7.50
  -2 -14   1   46.40    8.10
  -2  14   1   50.59    9.60
   2  14  -1   79.99   14.60
   0 -14   1   71.19   13.40
   0  14  -1   98.09   14.50
   0  14   1   89.39   14.90
   2 -14   1   46.40   22.50
  -2 -14  -1   30.50   19.80
  -4 -14  -1   20.30    7.20
  -4 -14  -1   33.20   19.10
   4  14   1   26.00    8.00
  -6 -14  -1   18.90   17.60
  -6 -14  -1   13.40    6.70
   6  14   1   16.90    7.60
  28   0  -2  194.78   13.80
 -28   0   2  185.48   14.50
 -26   0   2  366.26   19.90
 -24   0   2 2552.04  100.99
 -22   0   2  488.45   23.00
 -20   0   2 2141.39   84.29
 -18   0   2  335.17   16.10
 -16   0   2  418.16   18.60
 -14   0   2   56.59    4.80
 -12   0   2  762.52   30.60
 -10   0   2  422.86   17.40
  -8   0   2  654.33   25.30
  -8   0   2  627.94   25.20
  -6   0   2    2.60    1.00
  -6   0   2    3.90    0.80
  -4   0   2 5958.30  228.48
  -4   0   2 6134.29  228.88
  -2   0   2 2208.78   85.09
  -2   0   2 2286.47   87.19
   0   0  -2 8160.48  315.47
   0   0  -2 9076.29  323.07
   0   0   2 7374.86  315.87
   0   0   2 8674.73  315.17
   2   0   2 7877.31  302.97
  -2   0  -2 8325.67  303.27
   2   0   2 7796.82  303.67
  -4   0  -2 2223.88   83.89
   4   0   2 2148.29   83.59
   4   0   2 2226.08   83.79
   6   0   2 2431.96   90.69
   6   0   2 2351.86   90.59
  -6   0  -2 2344.07   90.89
  -8   0  -2 1051.59   41.90
   8   0   2 1080.09   41.70
 -10   0  -2   71.19    5.50
  10   0   2   93.69    5.30
 -12   0  -2   75.69    6.10
  12   0   2   95.49    5.80
  14   0   2  463.95   20.30
 -14   0  -2  446.76   20.70
  14   0   2  495.25   20.10
 -16   0  -2  552.94   24.70
  16   0   2  575.34   24.40
 -18   0  -2  352.86   17.80
  18   0   2  367.36   17.50
 -20   0  -2   55.49    7.80
  20   0   2   57.29    7.70
 -22   0  -2  282.57   16.60
  22   0   2  307.17   16.40
 -24   0  -2  849.12   38.50
  24   0   2  879.81   37.90
 -26   0  -2  544.05   28.00
  26   0   2  587.74   27.70
 -27  -1   2  229.38   15.10
  27   1  -2  235.68   14.60
 -27   1   2  206.28   15.20
 -25  -1   2  304.17   17.20
  25   1  -2  310.87   16.50
 -25   1   2  295.77   17.30
 -23  -1   2 1344.97   54.19
 -23   1   2 1291.07   54.19
 -21  -1   2  636.84   27.80
 -21   1   2  618.54   27.80
 -19  -1   2  527.85   23.50
 -19   1   2  521.15   23.50
 -17  -1   2  395.86   18.10
 -17  -1   2  419.36   18.70
  17   1  -2  408.96   19.60
 -17   1   2  431.96   18.80
 -15  -1   2    0.00    1.80
 -15   1   2    1.50    1.70
 -13  -1   2   47.20    5.70
 -13  -1   2   58.69    4.60
 -13   1   2   62.49    4.70
 -11  -1   2   40.70    3.60
 -11  -1   2   48.50    5.00
 -11   1   2   48.20    3.80
  11   1  -2   52.49    7.00
  -9  -1   2    4.60    1.10
  -9   1   2    6.20    1.20
  -7  -1   2   31.60    2.40
  -7  -1   2   25.70    3.30
  -7   1   2   34.80    2.60
  -5   1   2  335.47   18.00
  -5   1   2  365.76   21.10
  -3  -1   2 1568.94   57.69
  -3   1   2 1442.76   57.49
   1  -1  -2 1632.64   60.89
   1   1  -2 1333.67   59.09
   1  -1   2 4179.68  147.79
   1   1   2 3730.63  147.89
   1   1   2 3813.32  147.59
  -1   1  -2 3880.81  147.39
  -3  -1  -2 9640.44  361.36
   3  -1   2 9999.00  361.16
   3   1   2 9384.56  361.16
   3   1   2 9137.59  361.46
  -3   1  -2 9540.45  360.96
   5  -1   2 4316.87  160.98
  -5  -1  -2 4317.27  161.48
  -5   1  -2 4188.38  161.28
   5   1   2 4210.58  161.18
   5   1   2 4230.08  161.78
  -7  -1  -2 1368.76   53.09
   7   1   2 1361.66   52.69
   7   1   2 1379.66   53.39
  -7   1  -2 1357.76   52.99
  -9  -1  -2    5.00    1.60
  -9   1  -2    7.30    1.60
   9   1   2    6.60    1.60
 -11  -1  -2   95.49    6.40
  11   1   2  102.29    6.50
 -11   1  -2  105.09    6.30
  11   1   2   87.19    6.00
 -13  -1  -2  164.58    9.70
  13   1   2  171.98    9.50
  13   1   2  190.48    9.80
 -13   1  -2  178.28    9.70
 -15  -1  -2    6.70    2.50
 -15   1  -2   11.30    2.70
  15   1   2   11.50    2.80
 -15   1  -2    9.00    8.70
  15   1   2    9.70    2.60
 -17  -1  -2    0.00    2.40
  17   1   2    1.70    2.60
 -17   1  -2    0.50    2.60
 -19  -1  -2    6.70    3.20
  19   1   2    5.10    3.20
 -19   1  -2   -9.60   10.90
 -19   1  -2    3.60    3.10
  21  -1   2   72.99    8.90
 -21  -1  -2   77.99    9.00
 -21   1  -2   76.69    9.00
  21   1   2   80.49    8.80
  23  -1   2  231.78   14.60
 -23  -1  -2  236.98   15.20
 -23   1  -2  233.08   15.10
  23   1   2  243.18   14.80
 -25  -1  -2  246.08   16.20
  25  -1   2  248.38   15.60
  25   1   2  253.77   15.80
 -25   1  -2  226.28   15.90
 -28  -2   2   14.10    5.00
 -28   2   2   -4.00   14.50
 -28   2   2   11.50    5.20
  28   2  -2   17.60    4.80
 -26  -2   2    2.00    4.00
  26   2  -2    1.00    3.80
 -26   2   2   -0.50    4.00
 -26   2   2   -7.10   13.30
 -24  -2   2   21.90    4.50
  24   2  -2   19.50    4.00
 -24   2   2    9.30   13.50
 -24   2   2   19.20    4.50
 -22  -2   2   61.39    7.90
  22   2  -2   58.09    7.40
 -22   2   2   52.49    7.80
 -20  -2   2    1.30    2.70
 -20   2   2   14.30   11.60
  20   2  -2    0.90    2.40
 -20   2   2   -4.60    2.50
 -18  -2   2   97.89    7.60
 -18  -2   2   86.39    7.80
  18   2  -2  102.49    7.30
 -18   2   2  103.99    8.00
 -18   2   2  117.39   27.00
  18   2  -2   92.69    9.60
 -16  -2   2  180.78   10.80
 -16  -2   2  193.38   10.10
 -16   2   2  173.78   26.80
 -16   2   2  206.88   10.30
  16   2  -2  148.59   12.60
 -14  -2   2  372.56   17.60
 -14  -2   2  395.26   16.20
  14   2  -2  330.17   19.90
 -14   2   2  309.97   29.50
 -14   2   2  406.46   16.50
 -12  -2   2  387.96   16.20
 -12  -2   2  365.26   17.80
  12   2  -2  387.66   20.70
 -12   2   2  396.96   16.40
 -12   2   2  349.37   28.60
 -10  -2   2 1207.88   48.00
 -10  -2   2 1179.78   49.50
 -10   2   2 1240.48   48.30
  10   2  -2 1327.37   52.59
  -8  -2   2 1736.03   69.09
  -8  -2   2 1787.62   67.89
  -8   2   2 1799.52   68.29
  -6  -2   2 1662.43   63.29
  -6  -2   2 1644.44   62.19
  -6   2   2 1623.74   68.19
  -6   2   2 1621.04   62.59
   6   2  -2 1601.84   62.09
  -4  -2   2 6536.35  242.78
  -4  -2   2 6561.14  243.68
  -4   2   2 6356.36  243.28
   4   2  -2 6268.87  242.58
  -2  -2   2    1.30    1.10
  -2   2   2    3.90    0.90
  -2   2   2    4.50    1.00
   0  -2   2  383.56   14.70
   0   2   2  343.77   14.40
   0   2  -2  365.36   19.70
   0   2   2  355.16   15.10
   2  -2   2 1360.96   50.79
  -2  -2  -2 1428.86   53.99
   2   2   2 1252.67   50.79
  -2   2  -2 1285.57   50.59
   2   2   2 1292.47   51.69
   4  -2   2  996.20   36.40
  -4  -2  -2  959.10   37.00
  -4  -2  -2 1000.10   37.10
   4   2   2  958.30   37.80
   4   2   2  945.21   36.60
  -4   2  -2  942.71   36.60
  -4   2  -2  818.32   44.00
  -6  -2  -2  161.78    7.70
   6   2   2  161.08    8.60
  -6   2  -2  152.98    7.30
   6   2   2  155.98    7.30
  -8  -2  -2  165.78    8.40
   8   2   2  169.38    8.00
   8   2   2  172.08    9.40
  -8   2  -2  160.98    8.10
 -10  -2  -2 3487.45  133.39
 -10   2  -2 3439.96  133.29
  10   2   2 3410.76  132.89
  10   2   2 3447.86  134.29
 -10   2  -2 3624.94  143.79
 -12  -2  -2  653.43   27.10
  12   2   2  643.14   26.50
  12   2   2  650.83   27.90
 -12   2  -2  639.74   26.90
 -14  -2  -2  496.55   22.10
  14   2   2  521.95   22.80
 -14   2  -2  468.05   37.10
  14   2   2  506.05   21.50
 -14   2  -2  503.75   22.00
 -16  -2  -2  379.76   17.80
 -16   2  -2  317.27   34.80
  16   2   2  375.66   18.30
 -16   2  -2  370.96   17.60
  16   2   2  386.86   17.30
 -18  -2  -2   64.39    7.80
  18   2   2   65.49    7.60
 -18   2  -2   64.59    7.60
 -20  -2  -2  148.59   11.20
  20   2   2  154.98   11.00
 -20   2  -2  159.58   11.60
 -22  -2  -2   68.39    9.30
  22   2   2   82.59    9.10
 -22   2  -2   57.09    9.20
 -24  -2  -2   15.50    4.80
  24  -2   2   22.00    4.80
 -24   2  -2   -1.00   14.60
  24   2   2   17.80    4.50
 -24   2  -2   18.30    4.70
 -26  -2  -2   -6.20    4.00
  26  -2   2   -4.60    4.20
 -26   2  -2  -10.20   15.40
  26   2   2   -2.30    4.20
 -26   2  -2   -2.10    4.30
 -27  -3   2   17.20    4.90
  27   3  -2   21.00    4.60
 -27   3   2   20.70    5.10
 -25  -3   2  104.39   10.30
 -25   3   2  107.29   10.50
  25   3  -2  116.59    9.80
 -23  -3   2  235.18   14.00
  23   3  -2  244.68   13.40
 -23   3   2  236.08   14.20
 -21  -3   2  239.08   13.30
 -21   3   2  182.88   33.30
 -21   3   2  244.68   13.60
  21   3  -2  244.08   12.70
 -19  -3   2   15.90    3.10
 -19  -3   2   12.20    3.50
  19   3  -2   12.00    2.80
 -19   3   2   12.10    3.30
 -19   3   2   24.90   12.60
  19   3  -2   14.80    4.60
 -17  -3   2   46.60    7.30
 -17  -3   2   56.99    5.70
 -17   3   2   46.40    5.90
  17   3  -2   50.89    9.00
  17   3  -2   45.40    5.30
 -15  -3   2  234.48   13.40
 -15  -3   2  234.28   11.50
 -15   3   2  222.78   27.90
  15   3  -2  236.98   16.00
  15   3  -2  239.08   11.00
 -15   3   2  225.18   11.70
 -13  -3   2 1510.75   61.19
 -13  -3   2 1508.65   59.19
 -13   3   2 1475.35   59.49
 -13   3   2 1589.44   73.09
  13   3  -2 1490.15   64.29
  13   3  -2 1537.45   58.79
 -11  -3   2  936.41   37.20
 -11  -3   2  941.91   39.40
  11   3  -2  899.51   42.30
 -11   3   2  973.60   49.70
 -11   3   2  949.51   37.50
  11   3  -2  948.41   36.80
  -9  -3   2 5316.17  202.98
   9  -3  -2 5962.80  209.48
  -9  -3   2 4959.30  204.68
  -9   3   2 5221.88  203.38
   9   3  -2 5527.45  208.18
   9   3  -2 5139.09  202.68
  -7  -3   2 3065.09  119.59
  -7  -3   2 2984.50  121.19
  -7   3   2 3605.44  127.99
   7   3  -2 3009.20  119.29
  -7   3   2 3084.29  120.09
  -5  -3   2 2966.70  113.69
  -5  -3   2 3051.49  115.19
  -5   3   2 3006.00  114.29
   5   3  -2 2935.51  113.49
  -5   3   2 2787.12  113.89
  -5   3   2 3235.78  119.39
  -3  -3   2  882.71   36.40
  -3  -3   2  899.71   35.10
  -3   3   2  865.81   34.80
  -3   3   2  878.01   34.40
   1  -3  -2 3290.67  133.89
  -1  -3   2 3579.84  134.29
  -1   3   2 3397.86  133.79
   1   3  -2 3839.12  136.69
  -1   3   2 3517.75  134.79
   1  -3   2 1443.96   55.19
  -1  -3  -2 1423.36   55.49
  -1   3  -2 1438.76   54.59
   1   3   2 1400.86   54.99
   1   3   2 1442.86   56.49
  -3  -3  -2 1510.85   56.59
   3  -3   2 1463.15   55.69
   3   3   2 1469.95   57.69
  -3   3  -2 1403.06   55.59
   3   3   2 1408.06   55.79
  -5  -3  -2  423.26   17.60
  -5  -3  -2  446.56   18.30
   5   3   2  414.36   17.30
  -5   3  -2  414.26   17.20
   5   3   2  426.26   19.30
  -7  -3  -2   66.29    4.60
  -7  -3  -2   66.99    5.50
   7   3   2   65.99    6.30
  -7   3  -2   59.49    4.20
   7   3   2   68.89    4.30
  -9  -3  -2  393.46   17.00
  -9  -3  -2  421.56   17.70
  -9   3  -2  377.86   16.80
   9   3   2  401.86   18.90
   9   3   2  369.06   16.50
 -11  -3  -2 1187.08   47.00
 -11  -3  -2 1241.68   47.30
  11   3   2 1142.39   46.30
  11   3   2 1175.58   48.70
 -11   3  -2 1146.09   46.70
 -13  -3  -2 2354.56   93.19
 -13   3  -2 2522.85  108.59
 -13   3  -2 2332.97   92.99
  13   3   2 2408.26   92.59
  13   3   2 2370.36   94.79
 -15  -3  -2 1122.59   46.10
  15   3   2 1148.09   47.70
  15   3   2 1154.28   45.50
 -15   3  -2 1113.79   46.00
 -17  -3  -2  417.66   20.10
  17   3   2  430.56   21.40
 -17   3  -2  405.86   19.90
  17   3   2  438.36   19.50
 -19  -3  -2  385.06   19.20
  19   3   2  393.76   18.50
 -19   3  -2  371.26   19.20
 -21  -3  -2   -1.60    3.50
 -21   3  -2    4.80    3.60
 -21   3  -2   -4.10   13.20
  21   3   2    3.70    3.80
 -23  -3  -2   17.20    5.00
  23   3   2   26.10    4.90
 -23   3  -2   20.40    5.10
 -25  -3  -2   88.49   11.60
  25   3   2  104.69   11.50
 -25   3  -2  108.59   11.70
 -26  -4   2   25.50    4.80
  26   4  -2   30.10    4.50
 -26   4   2   23.40    5.00
 -24  -4   2   94.29    9.70
 -24   4   2   96.09    9.80
  24   4  -2  101.09    8.90
 -22  -4   2  286.47   15.40
 -22   4   2  287.37   15.90
  22   4  -2  291.07   14.80
 -20  -4   2  274.37   14.50
 -20  -4   2  235.48   15.30
  20   4  -2  281.77   13.80
  20   4  -2  283.17   18.40
 -20   4   2  281.67   14.80
 -20   4   2  296.47   36.40
 -18  -4   2    6.20    3.80
 -18  -4   2    6.50    2.70
  18   4  -2    6.60    2.60
 -18   4   2   12.40    3.00
  18   4  -2    5.30    4.30
 -18   4   2   21.70   11.90
 -16  -4   2   42.60    7.70
 -16  -4   2   41.00    5.20
  16   4  -2   39.70    4.70
 -16   4   2   37.00    5.20
  16   4  -2   35.30    6.20
 -14  -4   2 1239.28   49.99
 -14  -4   2 1238.68   47.50
  14   4  -2 1265.07   53.59
 -14   4   2 1201.68   47.80
 -14   4   2 1018.20   60.79
  14   4  -2 1227.08   46.90
 -12  -4   2  432.36   20.80
 -12  -4   2  435.76   18.00
 -12   4   2  377.86   30.70
  12   4  -2  454.75   24.30
 -12   4   2  422.16   18.40
  12   4  -2  423.66   17.50
 -10  -4   2 1868.01   80.29
  10  -4  -2 2071.19   85.69
 -10  -4   2 2024.20   78.09
 -10   4   2 2193.78   90.29
  10   4  -2 1937.31   77.59
  10   4  -2 2171.68   84.59
 -10   4   2 1959.50   78.49
  -8  -4   2 1059.19   44.80
  -8  -4   2 1053.89   47.00
   8  -4  -2 1293.07   53.79
   8   4  -2 1271.27   51.09
  -8   4   2 1294.57   54.09
  -8   4   2 1106.19   45.30
   8   4  -2 1036.60   44.40
  -6  -4   2 1813.82   71.89
  -6   4   2 1828.92   70.39
  -6   4   2 1925.41   76.99
   6   4  -2 1767.62   69.49
  -6   4   2 1788.92   70.19
   4  -4  -2   10.00    5.50
   4  -4  -2    4.70    1.30
  -4  -4   2    6.00    2.30
  -4   4   2    6.10    1.60
   4   4  -2    6.80    1.00
  -4   4   2    9.20    1.50
   2  -4  -2  960.20   37.90
  -2  -4   2  989.10   38.70
   2   4  -2  910.81   36.90
  -2   4   2 1005.20   39.20
  -2   4   2  963.10   37.60
   0  -4  -2 1924.41   75.49
   0  -4  -2 2251.27   84.09
   0  -4   2 1918.71   75.39
   0   4  -2 1869.61   74.29
   0   4   2 1842.62   74.69
   0   4  -2 1952.10   78.79
   0   4   2 1910.91   76.79
  -2  -4  -2 1991.40   73.89
   2  -4   2 1884.31   72.99
   2   4   2 1834.82   72.59
   2   4   2 1874.51   75.19
  -2   4  -2 1895.51   72.39
   4  -4   2 1492.45   58.39
  -4  -4  -2 1630.94   59.89
   4   4   2 1489.25   58.29
   4   4   2 1475.25   61.19
  -4   4  -2 1476.05   58.19
  -6  -4  -2   43.00    5.70
   6   4   2   41.70    6.30
   6   4   2   48.40    3.80
  -6   4  -2   41.90    3.50
  -8  -4  -2    7.80    2.70
   8  -4   2   12.70    8.10
  -8  -4  -2    8.70    1.80
  -8   4  -2    7.00    1.60
   8   4   2    6.10    2.90
   8   4   2    9.50    1.70
  -8   4  -2    8.20    8.90
  10  -4   2  717.03   39.80
 -10  -4  -2  835.72   33.10
 -10  -4  -2  781.72   31.90
 -10   4  -2  789.82   31.70
  10   4   2  784.32   34.80
  10   4   2  769.42   31.30
 -12  -4  -2 1208.18   49.50
 -12  -4  -2 1284.07   50.49
  12   4   2 1224.08   52.29
  12   4   2 1178.38   48.80
 -12   4  -2 1328.57   66.89
 -12   4  -2 1223.98   49.50
 -14  -4  -2  644.84   27.60
  14   4   2  635.24   26.90
  14   4   2  644.94   30.30
 -14   4  -2  656.53   27.60
 -16  -4  -2  154.98    9.90
  16   4   2  157.38   12.30
  16   4   2  157.38    9.40
 -16   4  -2  106.49   31.60
 -16   4  -2  138.29    9.90
 -18  -4  -2  177.38   11.60
  18   4   2  170.28   13.90
 -18   4  -2  177.88   11.60
  18   4   2  191.58   11.20
 -20  -4  -2   93.49    9.60
  20   4   2  102.39    9.10
 -20   4  -2   92.59    9.50
 -22  -4  -2    0.20    3.90
 -22   4  -2    1.20    3.70
 -22   4  -2    0.20   14.70
  22   4   2    1.20    3.80
 -24  -4  -2   27.40    5.40
  24   4   2   34.20    5.40
 -24   4  -2   35.30    5.70
 -27  -5   2    5.80    4.10
  27   5  -2    7.60    3.80
 -27   5   2   -5.30   14.50
 -27   5   2    2.40    4.20
 -25  -5   2    2.30    3.50
 -25   5   2    0.80    3.90
  25   5  -2    1.90    3.30
 -23  -5   2    3.60    3.30
 -23   5   2  -11.60   13.00
  23   5  -2    2.50    3.00
 -23   5   2   -0.60    3.30
 -21  -5   2   -2.50    3.70
 -21  -5   2    4.20    2.90
 -21   5   2   -4.20   12.10
 -21   5   2    0.30    3.00
  21   5  -2    4.60    2.80
  21   5  -2   -0.10    4.90
 -19  -5   2   -0.80    3.80
 -19  -5   2    0.00    2.60
 -19   5   2    2.60    2.70
  19   5  -2   -0.30    2.40
  19   5  -2    4.80    4.80
 -17  -5   2    4.30    3.90
 -17   5   2    0.50    2.30
  17   5  -2    5.80    4.50
 -15  -5   2   49.99    5.60
 -15  -5   2   63.09    8.90
  15   5  -2   46.60    5.10
 -15   5   2   54.49    5.80
  15   5  -2   66.59   10.90
 -13  -5   2    0.70    1.60
 -13  -5   2    3.90    3.40
 -13   5   2   -3.70    7.20
  13   5  -2    2.20    3.80
  13   5  -2    2.30    1.50
 -13   5   2   -0.50    1.70
 -11  -5   2  288.77   15.50
 -11  -5   2  275.07   12.40
 -11   5   2  288.97   13.00
  11   5  -2  283.17   12.00
  11   5  -2  228.08   17.60
  -9  -5   2    4.30    2.80
  -9  -5   2    1.60    1.40
   9   5  -2    1.30    4.00
  -9   5   2    3.40    4.50
   9   5  -2    2.30    1.20
  -7  -5   2   60.09    7.60
  -7   5   2   72.69    5.20
  -7   5   2   71.39    5.20
  -7   5   2   54.49   12.40
   7   5  -2   68.49    4.20
  -5  -5   2    7.70    3.00
   5   5  -2    9.60    1.40
   5   5  -2   23.20    5.30
   3  -5  -2  122.19    7.10
  -3  -5   2  115.49    8.40
  -3   5   2  122.09    8.20
   3   5  -2  114.59    5.60
  -3   5   2  121.69    6.50
   1  -5  -2    5.60    7.50
  -1  -5   2    3.90    2.30
   1  -5  -2    7.00    2.20
  -1   5   2    5.50    2.50
  -1   5   2    6.90    1.60
  -1  -5  -2   25.70    5.00
   1  -5   2   17.20    2.80
   1   5   2   17.20    3.40
   1   5   2   27.80    3.50
  -1   5  -2   19.70    2.60
  -3  -5  -2   -1.30    2.30
   3  -5   2   14.50    8.70
  -3  -5  -2   11.90    7.60
   3   5   2    1.00    2.40
  -3   5  -2    1.60    1.10
   5  -5   2  296.77   31.20
   5  -5   2  321.97   14.30
  -5  -5  -2  361.76   16.60
   5   5   2  315.77   14.00
  -5   5  -2  330.87   13.90
  -5   5  -2  311.47   25.80
   5   5   2  331.47   17.90
  -7  -5  -2  227.78   12.90
   7   5   2  204.88    9.90
  -7   5  -2  204.58    9.90
   7   5   2  204.98   14.00
  -9  -5  -2   15.10    3.70
   9  -5   2    2.10    8.00
  -9  -5  -2   10.00    2.50
   9   5   2   15.10    2.20
   9   5   2   12.50    3.80
  -9   5  -2   12.90    2.10
 -11  -5  -2   65.69    8.10
 -11  -5  -2   57.89    5.60
  11   5   2   55.99    8.80
  11   5   2   57.39    5.20
 -11   5  -2   53.39    5.20
 -13  -5  -2   45.80    7.90
 -13  -5  -2   40.30    5.50
 -13   5  -2   39.40    5.30
  13   5   2   40.10    5.30
  13   5   2   30.70    5.70
 -15  -5  -2    1.40    3.70
 -15  -5  -2    5.70    2.70
  15   5   2    1.90    2.40
  15   5   2    0.50    4.10
 -15   5  -2    2.30   12.30
 -15   5  -2    4.50    2.60
 -17  -5  -2   22.60    3.90
 -17   5  -2   11.20   13.60
 -17   5  -2   17.20    3.80
  17   5   2   14.50    5.70
  17   5   2   24.30    3.70
 -19  -5  -2    4.90    3.50
 -19   5  -2    1.20    3.40
  19   5   2    4.30    3.30
  19   5   2   -0.50    4.80
 -19   5  -2   -0.10   13.60
 -21  -5  -2   15.40    4.50
 -21   5  -2   19.30    4.60
  21   5   2   20.40    4.20
 -21   5  -2   14.60   15.10
 -23  -5  -2    6.70    4.10
 -23   5  -2   -2.90   14.90
  23   5   2   16.30    4.20
 -23   5  -2   11.30    4.50
 -26  -6   2   91.39   10.10
 -26   6   2   91.69   11.00
  26   6  -2   95.09    9.60
 -24  -6   2  186.98   12.70
 -24   6   2  175.28   13.20
  24   6  -2  188.38   11.70
 -22  -6   2   86.29   11.90
 -22  -6   2  120.79    9.60
  22   6  -2   97.09   14.60
 -22   6   2  110.69   10.10
  22   6  -2  121.99    8.80
 -20  -6   2   20.60    5.50
  20   6  -2   26.30    7.40
 -20   6   2   26.90    4.30
 -18  -6   2    5.10    2.70
 -18  -6   2   -1.70    4.10
  18   6  -2    4.60    2.50
 -18   6   2   -2.10    2.60
  18   6  -2    0.50    5.40
 -16  -6   2  166.18   12.90
 -16  -6   2  165.18    9.60
  16   6  -2  162.18    9.00
 -16   6   2  146.09    9.80
  16   6  -2  142.19   15.10
 -14  -6   2  612.64   25.70
 -14  -6   2  602.04   28.70
 -14   6   2  602.64   26.10
  14   6  -2  612.24   25.10
  14   6  -2  617.74   32.30
 -12  -6   2 1126.29   45.20
 -12  -6   2 1145.69   48.50
 -12   6   2 1152.38   45.80
  12   6  -2 1112.59   44.70
 -12   6   2 1252.47   58.69
  12   6  -2 1057.79   51.69
 -10  -6   2 1379.76   57.79
  10  -6  -2 1313.07   66.39
  10   6  -2 1348.17   54.09
 -10   6   2 1384.86   55.09
  10   6  -2 1410.06   61.69
 -10   6   2 1566.24   66.69
  -8  -6   2 1202.68   52.49
   8  -6  -2 1379.86   63.59
  -8   6   2 1345.77   60.09
   8   6  -2 1344.97   56.89
  -8   6   2 1261.17   50.69
   8   6  -2 1194.98   49.30
  -8   6   2 1224.48   50.29
   6  -6  -2  609.14   27.30
  -6  -6   2  672.43   29.90
  -6   6   2  716.13   29.10
   6   6  -2  683.83   26.70
  -6   6   2  707.03   27.70
   4  -6  -2  207.58   26.80
  -4  -6   2  215.68   12.80
   4  -6  -2  225.78   11.30
  -4   6   2  230.88   10.60
   4   6  -2  222.48   15.90
   4   6  -2  226.98    9.70
  -4   6   2  222.48   12.60
  -2  -6   2    8.60    3.20
   2  -6  -2   10.80    2.90
   2  -6  -2    3.50    9.60
  -2   6   2   13.90    2.00
  -2   6   2   14.10    3.30
   2   6  -2   12.50    1.50
   0  -6   2  630.44   28.30
   0  -6   2  770.52   41.20
   0  -6  -2  641.14   28.60
   0   6  -2  792.42   31.80
   0   6   2  638.24   26.80
   0   6   2  602.04   30.00
   0   6  -2  608.74   26.30
   2  -6   2 1489.65   59.89
   2  -6   2 1532.35   74.49
  -2  -6  -2 1553.34   60.99
  -2  -6  -2 1537.65   74.09
  -2   6  -2 1531.05   58.39
   2   6   2 1415.86   62.59
   2   6   2 1501.35   58.69
  -2   6  -2 1537.45   65.59
   4  -6   2  337.47   16.40
  -4  -6  -2  372.46   18.40
  -4   6  -2  370.26   15.30
   4   6   2  358.46   15.40
   4   6   2  351.06   19.80
   6  -6   2  426.76   18.50
  -6  -6  -2  441.46   21.00
   6   6   2  405.36   17.70
   6   6   2  396.16   22.30
  -6   6  -2  429.86   17.90
  -8  -6  -2  125.39   10.60
   8   6   2  117.29    7.10
   8   6   2  116.79   11.60
  -8   6  -2  125.99    7.20
 -10  -6  -2  291.77   16.60
  10   6   2  257.87   18.00
 -10   6  -2  287.87   13.30
  10   6   2  264.87   12.80
 -12  -6  -2  828.22   35.20
 -12  -6  -2  772.92   32.40
  12   6   2  767.62   37.50
 -12   6  -2  806.42   32.30
  12   6   2  763.22   31.70
 -12   6  -2  695.23   51.59
 -14  -6  -2  822.32   36.40
 -14  -6  -2  782.22   34.10
 -14   6  -2  825.62   34.20
  14   6   2  805.62   33.40
  14   6   2  808.32   39.30
 -16  -6  -2  749.82   34.30
 -16  -6  -2  723.93   32.40
  16   6   2  754.92   31.60
 -16   6  -2  770.12   32.60
  16   6   2  759.82   37.50
 -18  -6  -2  226.18   13.70
  18   6   2  223.78   18.20
  18   6   2  220.58   12.90
 -18   6  -2  242.58   14.10
 -20  -6  -2   75.59    9.20
  20   6   2   70.39   13.00
 -20   6  -2   57.89    9.40
  20   6   2   77.69    8.60
 -22  -6  -2   13.80    4.30
 -22   6  -2   -5.30   14.10
  22   6   2   18.10    4.00
 -22   6  -2   11.40    4.50
 -24   6  -2   31.90    6.00
 -25   7   2   23.70    5.10
 -25   7   2   -1.70   12.10
 -23  -7   2   63.99   12.30
 -23  -7   2   93.99   14.00
  23   7  -2   86.99   14.20
  23   7  -2  101.49    8.90
 -23   7   2   90.49    9.90
 -21  -7   2   29.40    6.20
  21   7  -2   39.50    8.20
 -19  -7   2    0.90    2.80
 -19   7   2   -6.60    9.70
 -19   7   2   -0.20    3.00
  19   7  -2   -7.00    5.40
  19   7  -2    4.80    2.60
 -17  -7   2    8.10    2.80
 -17  -7   2   -0.80    4.70
  17   7  -2    9.90    2.60
  17   7  -2   -7.50    5.40
 -17   7   2   -0.60    8.70
 -17   7   2    4.00    2.90
 -15  -7   2  276.37   17.90
 -15  -7   2  298.77   14.30
  15   7  -2  303.47   13.60
 -15   7   2  276.37   14.70
 -15   7   2  294.77   29.90
 -13  -7   2 1167.18   51.19
 -13   7   2 1299.17   62.89
  13   7  -2 1166.68   47.20
  13   7  -2 1237.98   55.59
 -13   7   2 1154.78   48.40
 -11  -7   2 1980.10   81.49
  11   7  -2 1940.81   77.59
 -11   7   2 2182.48   91.99
  11   7  -2 2032.10   85.69
 -11   7   2 1948.80   78.69
   9  -7  -2 2241.28  105.19
  -9  -7   2 2303.97   92.69
  -9   7   2 2434.16   90.79
   9   7  -2 2395.46   96.99
  -9   7   2 2307.57   89.99
   9   7  -2 2249.27   88.89
   7  -7  -2 1020.50   42.70
  -7  -7   2 1137.29   45.80
   7  -7  -2  995.60   58.19
  -7   7   2 1099.99   43.00
  -7   7   2 1181.18   44.90
   7   7  -2 1078.29   42.00
   7   7  -2 1023.90   49.00
   5  -7  -2  473.95   21.50
   5  -7  -2  552.44   39.00
  -5  -7   2  484.85   23.20
   5   7  -2  498.05   26.70
   5   7  -2  478.95   20.00
  -5   7   2  474.05   20.80
  -5   7   2  505.95   23.40
   3  -7  -2   -3.50    8.50
   3  -7  -2    6.10    2.80
  -3  -7   2    8.50    3.10
   3   7  -2    6.90    1.50
  -3   7   2    8.50    3.10
   3   7  -2    3.90    3.60
  -3   7   2    7.90    1.90
   1  -7  -2  369.26   34.50
  -1  -7   2  359.76   17.70
  -1  -7   2  365.66   30.70
   1  -7  -2  375.56   17.90
   1   7  -2  363.46   20.60
  -1   7   2  361.96   15.70
  -1   7   2  354.76   19.30
   1   7  -2  334.57   14.90
   1  -7   2  520.05   38.80
  -1  -7  -2  515.15   23.40
  -1  -7  -2  434.36   39.50
   1  -7   2  501.05   22.50
  -1   7  -2  493.25   25.20
   1   7   2  511.75   20.90
  -1   7  -2  503.65   20.30
   1   7   2  484.95   24.90
  -3  -7  -2  841.62   37.60
  -3  -7  -2  987.60   55.49
   3  -7   2  838.52   36.10
  -3   7  -2  873.71   34.60
  -3   7  -2  883.81   43.10
   3   7   2  792.62   39.20
   3   7   2  820.82   34.80
  -3   7  -2  942.91   39.20
  -5  -7  -2   72.79    9.70
   5  -7   2   97.79    7.50
   5   7   2   66.19   10.30
  -5   7  -2   74.29    9.40
  -5   7  -2   95.19   15.10
  -5   7  -2  101.59    5.90
   5   7   2   87.89    6.10
  -7  -7  -2   -6.10    3.40
   7  -7   2   -0.10    2.30
   7   7   2   -1.40    1.80
  -7   7  -2    0.70    6.70
  -7   7  -2    3.30    3.30
  -7   7  -2    1.70    1.60
  -9  -7  -2  323.87   19.20
   9   7   2  318.37   15.00
   9   7   2  303.97   21.00
  -9   7  -2  347.37   15.50
  -9   7  -2  365.56   34.10
 -11  -7  -2  984.50   41.60
 -11   7  -2  968.20   38.00
 -11   7  -2  865.11   56.89
  11   7   2  892.01   43.90
  11   7   2  896.61   37.30
 -13  -7  -2  858.51   37.30
 -13   7  -2  841.72   34.00
  13   7   2  803.62   33.20
 -13   7  -2  684.63   53.49
  13   7   2  818.72   40.40
 -15  -7  -2  962.30   42.00
  15   7   2  898.51   38.20
 -15   7  -2  928.81   39.20
  15   7   2  939.81   45.50
 -17  -7  -2  349.57   18.40
 -17  -7  -2  363.66   21.10
 -17   7  -2  364.76   18.70
  17   7   2  375.26   17.60
  17   7   2  353.96   24.50
 -19  -7  -2  294.17   16.60
  19   7   2  304.37   22.30
  19   7   2  301.27   15.50
 -19   7  -2  284.17   16.90
 -21  -7  -2    2.50    3.70
  21   7   2   -0.70    5.50
 -21   7  -2   -1.30   13.30
  21   7   2    1.20    3.30
 -21   7  -2   -5.20    3.60
 -23  -7  -2    3.40    3.90
 -23   7  -2    4.60    4.50
  23   7   2   10.80    4.00
 -23   7  -2   -4.10   14.00
  24   8  -2    7.90    7.40
 -24   8   2   18.90    4.60
 -24   8   2   13.30   11.20
 -22  -8   2   -3.40    4.80
 -22   8   2    2.70    9.40
 -22   8   2    3.20    3.60
  22   8  -2    2.20    5.80
 -20  -8   2   31.90    6.50
 -20   8   2   30.00   11.00
  20   8  -2   46.20    8.80
 -20   8   2   55.69    8.10
 -18  -8   2  183.18   15.50
 -18   8   2  204.08   28.30
  18   8  -2  187.38   19.10
 -18   8   2  190.18   12.40
 -16  -8   2   69.19   12.00
 -16   8   2   92.29   22.90
 -16   8   2   93.99    8.50
 -14  -8   2   98.89   12.80
 -14   8   2  118.19   23.90
  14   8  -2  153.38    8.20
 -14   8   2  131.19    9.30
  14   8  -2   92.09   15.70
 -12  -8   2  163.28   14.00
  12   8  -2  176.18   17.60
 -12   8   2  180.58   10.40
  12   8  -2  183.78    9.10
 -12   8   2  141.79   25.20
 -10  -8   2  198.08   14.20
 -10   8   2  208.68   11.10
  10   8  -2  195.88    9.80
  -8  -8   2  341.97   18.60
  -8   8   2  330.57   17.60
  -8   8   2  332.57   15.60
   8   8  -2  332.17   14.50
   6  -8  -2  568.34   25.70
  -6  -8   2  595.24   27.80
   6   8  -2  660.23   32.00
   6   8  -2  567.84   24.10
  -6   8   2  583.24   25.10
  -6   8   2  607.74   27.90
   4  -8  -2  258.97   35.90
  -4  -8   2  312.57   16.70
   4  -8  -2  314.07   16.00
   4   8  -2  269.67   19.40
  -4   8   2  308.67   14.10
   4   8  -2  311.07   13.20
  -4   8   2  315.77   17.50
  -2  -8   2  105.99    9.10
   2  -8  -2   95.99    9.40
  -2   8   2   98.99   10.10
   2   8  -2   96.19    5.80
  -2   8   2   96.89    6.90
   0  -8   2  189.38   11.90
   0  -8  -2  188.88   12.70
   0   8   2  188.88   14.00
   0   8  -2  186.08    9.00
   0   8   2  186.08    9.90
   2  -8   2    3.70   12.30
   2  -8   2   18.80    3.70
  -2  -8  -2    5.60    3.90
  -2  -8  -2    2.30   10.80
   2   8   2   10.80    2.50
   2   8   2    6.00    4.20
  -2   8  -2    9.30    4.10
   4  -8   2   38.40   16.40
  -4  -8  -2   47.70   15.90
  -4  -8  -2   54.19    9.80
   4  -8   2   74.79    7.70
   4   8   2   64.09    5.90
  -4   8  -2   62.99    5.00
  -4   8  -2   58.09    9.20
   6  -8   2   30.60   16.80
   6  -8   2   17.70    3.70
  -6   8  -2   21.80    4.70
  -6   8  -2   15.80    2.70
   6   8   2   23.20    5.80
  -8  -8  -2   96.29   12.40
   8   8   2   88.89   13.30
  -8   8  -2  114.09   21.50
  -8   8  -2  109.99    7.90
   8   8   2  115.59    7.80
 -10  -8  -2  239.38   17.40
 -10   8  -2  271.57   30.70
 -10   8  -2  256.87   13.10
  10   8   2  230.28   12.50
  10   8   2  230.68   19.10
 -12  -8  -2  348.17   21.30
  12   8   2  337.97   23.90
  12   8   2  364.16   16.60
 -12   8  -2  365.06   17.20
 -12   8  -2  309.77   35.60
 -14  -8  -2  117.29   14.10
  14   8   2  144.29    9.40
  14   8   2  124.09   16.50
 -14   8  -2  125.39   30.00
 -14   8  -2  144.19   10.00
 -16  -8  -2   19.60    6.50
 -16   8  -2   28.70    4.50
 -16   8  -2   21.20   13.20
  16   8   2   16.50    7.60
  18   8   2   47.90    9.50
  20   8   2   49.70    7.90
  20   8   2   25.70    8.20
 -20   8  -2   32.70    5.30
  22   8   2    1.60    7.00
 -22   8  -2  -13.20   13.00
 -22   8  -2    2.90    4.30
 -21  -9   2  202.08   17.50
 -21   9   2  196.58   31.10
  21   9  -2  218.08   20.80
 -21   9   2  215.68   14.00
 -19  -9   2  326.37   21.20
  19   9  -2  365.86   25.30
 -19   9   2  348.27   35.90
 -19   9   2  318.57   17.90
 -17  -9   2   91.69   12.60
  17   9  -2  104.29   15.50
 -17   9   2   94.99    9.20
 -17   9   2  118.89   27.30
 -15  -9   2   -4.90    4.60
 -15   9   2   -0.30    2.70
  15   9  -2   -4.10    5.60
 -13  -9   2   -2.80    4.70
 -13   9   2    5.40    2.80
  13   9  -2   -3.90    5.90
 -11  -9   2   46.10    7.10
  11   9  -2   46.80    8.70
  -9  -9   2   -6.50    3.90
  -9   9   2   -3.00    2.00
   9   9  -2   -8.70    4.90
   7  -9  -2   79.29    9.00
  -7  -9   2   95.19   10.90
   7   9  -2   97.89    8.20
   7   9  -2   83.99   13.70
  -7   9   2   97.39   10.40
  -7   9   2  105.59    7.50
  -5  -9   2  237.58   32.00
   5  -9  -2  157.98   12.40
  -5  -9   2  200.38   13.50
   5   9  -2  216.98   17.10
  -5   9   2  189.98   10.50
  -5   9   2  181.08   14.10
   5   9  -2  168.38    9.50
  -3  -9   2  180.68   12.30
   3  -9  -2  191.58   38.00
  -3  -9   2  109.19   31.50
   3  -9  -2  128.49   12.30
  -3   9   2  161.98    9.20
   3   9  -2  144.89    8.20
   3   9  -2  153.68   14.90
  -3   9   2  142.79   13.40
   1  -9  -2 1022.50   42.70
  -1  -9   2 1029.10   42.40
   1  -9  -2  981.20   65.79
  -1  -9   2  970.80   63.69
   1   9  -2  933.21   39.10
   1   9  -2 1022.60   45.70
  -1   9   2  975.40   44.60
  -1   9   2  978.60   39.80
  -1  -9  -2 1396.16   56.89
   1  -9   2 1449.15   56.19
   1   9   2 1361.36   59.29
  -1   9  -2 1245.88   58.29
   1   9   2 1372.46   53.99
  -1   9  -2 1353.06   53.39
   3  -9   2 1059.79   41.30
  -3  -9  -2 1002.50   42.70
  -3   9  -2  825.92   42.70
  -3   9  -2  996.20   38.90
   3   9   2  946.31   44.90
   3   9   2  983.00   39.20
   5  -9   2  730.33   30.10
  -5  -9  -2  722.53   32.50
   5   9   2  687.43   28.40
  -5   9  -2  561.64   31.00
  -5   9  -2  712.63   28.30
   5   9   2  655.03   34.50
   7  -9   2  226.88   43.40
  -7  -9  -2  281.77   18.00
  -7   9  -2  278.47   13.40
   7   9   2  268.67   13.40
   7   9   2  252.67   19.50
  -9  -9  -2   15.30    5.70
  -9  -9  -2   40.50   16.60
   9   9   2   17.90    6.20
  -9   9  -2   22.90    3.50
   9   9   2   23.00    3.40
 -11  -9  -2   -8.10    4.80
  11   9   2   -0.70    5.20
 -11   9  -2   -2.60    2.50
  11   9   2    1.00    2.60
 -13  -9  -2  285.67   19.90
  13   9   2  304.97   14.90
  13   9   2  279.77   22.50
 -13   9  -2  311.67   15.80
 -15  -9  -2    6.90    5.90
  15   9   2   11.80    7.30
  15   9   2   12.10    3.40
 -15   9  -2   11.20    3.70
 -17   9  -2   72.89    9.00
  17   9   2   79.79    8.60
  17   9   2   51.39   10.40
  19   9   2   14.80    4.10
 -19   9  -2   16.10    4.80
  19   9   2    7.40    7.70
 -20 -10   2  230.18   18.80
 -20  10   2  256.77   15.40
  20  10  -2  274.27   23.40
 -18 -10   2  221.88   17.80
 -18  10   2  238.08   14.30
  18  10  -2  245.38   21.80
 -16 -10   2   16.10    5.90
 -16  10   2   22.30    4.00
  16  10  -2   20.50    7.60
 -14 -10   2   13.70    5.50
 -14  10   2   12.70    3.40
  14  10  -2   16.90    6.80
 -12 -10   2  132.69   13.00
 -12  10   2  142.59    9.50
  12  10  -2  137.79   16.00
 -10 -10   2  305.17   19.10
 -10  10   2  323.97   15.70
  -8 -10   2   58.49   10.40
   8  10  -2   56.79    9.40
  -6 -10   2  302.37   18.60
  -6 -10   2  243.68   36.50
   6 -10  -2  313.07   17.00
  -6  10   2  340.47   19.30
   6  10  -2  281.97   21.80
  -6  10   2  335.07   15.20
   4 -10  -2  494.95   54.79
   4 -10  -2  560.54   27.30
  -4 -10   2  592.34   28.00
  -4  10   2  592.04   25.00
  -4  10   2  596.44   29.70
   4  10  -2  607.44   31.80
  -2 -10   2  649.14   29.10
   2 -10  -2  597.34   29.20
   2  10  -2  598.24   31.90
  -2  10   2  603.54   26.00
  -2  10   2  589.94   31.10
   0 -10   2 1708.93   67.49
   0 -10  -2 1697.73   68.19
   0  10   2 1623.74   64.99
   0  10  -2 1579.14   70.09
   0  10   2 1647.94   70.49
   2 -10   2 1372.06   91.49
   2 -10   2 1654.03   63.99
  -2 -10  -2 1642.84   65.29
  -2  10  -2 1552.44   66.39
   2  10   2 1549.05   61.79
   2  10   2 1604.74   67.89
   4 -10   2  744.63   68.09
  -4 -10  -2  933.11   40.10
   4 -10   2  921.41   38.00
  -4  10  -2  888.91   36.20
   4  10   2  871.31   36.10
  -4  10  -2  893.21   40.20
   4  10   2  871.51   42.40
  -6 -10  -2  317.97   43.80
   6 -10   2  388.56   51.99
  -6 -10  -2  411.06   22.70
   6  10   2  415.26   25.10
   6  10   2  399.56   18.40
  -6  10  -2  440.96   18.50
  -8 -10  -2   41.90    7.20
  -8 -10  -2   33.20   15.90
   8  10   2   47.80    8.70
  -8  10  -2   65.79    6.50
   8  10   2   60.19    6.90
 -10 -10  -2   -5.30    5.00
 -10 -10  -2   18.40   14.60
 -10  10  -2    2.70    2.70
  10  10   2    4.10    5.70
  10  10   2    1.30    2.70
 -12 -10  -2  370.76   22.40
 -12  10  -2  359.96   18.00
  12  10   2  344.07   25.00
  12  10   2  357.86   17.30
  14  10   2   82.49   15.60
  14  10   2   74.39    8.60
 -14  10  -2   80.59    8.70
 -16 -10  -2   42.00    8.30
  16  10   2   59.09   10.80
  16  10   2   69.29    8.60
 -16  10  -2   82.59    9.10
  18  10   2   23.60    5.10
 -18  10  -2   25.40    5.10
  18  10   2   10.30    8.50
 -19 -11   2  164.98   17.00
  19  11  -2  193.48   21.30
 -19  11   2  175.88   13.10
 -17 -11   2    9.00    6.30
  17  11  -2   14.60    7.90
 -17  11   2   11.40    4.20
 -15 -11   2   -2.10    5.80
  15  11  -2    1.60    6.90
 -15  11   2    6.50    3.50
  13  11  -2   -7.50    6.20
 -13  11   2   -0.90    2.90
 -11 -11   2   32.90   15.00
 -11 -11   2   15.90    5.70
  11  11  -2   19.90    7.70
 -11  11   2   23.10    3.80
  -9 -11   2   12.70   14.80
  -9 -11   2    5.20    5.00
   9  11  -2    1.90    5.80
  -9  11   2   11.90    3.10
  -7 -11   2   99.09   12.00
   7 -11  -2  139.99   39.20
   7  11  -2  117.89   15.40
  -7  11   2  107.89    8.50
   5 -11  -2   23.40    5.60
  -5 -11   2   36.00    6.30
  -5 -11   2   43.40   17.40
   5 -11  -2   14.80   16.70
  -5  11   2   34.40    6.70
   5  11  -2   30.20    7.80
  -3 -11   2   28.90   17.70
   3 -11  -2   20.10    5.40
   3 -11  -2   32.60   19.00
  -3 -11   2   20.30    5.60
  -3  11   2   22.40    6.10
   3  11  -2   28.40    6.90
  -3  11   2   20.80    3.50
   1 -11  -2  265.17   47.00
  -1 -11   2  267.07   47.40
   1 -11  -2  188.38   15.40
  -1 -11   2  203.98   15.00
   1  11  -2  230.08   17.60
  -1  11   2  205.38   17.10
  -1  11   2  198.98   11.90
   1 -11   2  463.85   55.19
  -1 -11  -2  525.05   26.50
   1 -11   2  523.15   25.40
  -1 -11  -2  489.15   53.59
   1  11   2  526.05   23.00
  -1  11  -2  546.95   28.20
   1  11   2  524.55   28.70
   3 -11   2  346.97   18.20
  -3 -11  -2  300.37   44.80
   3 -11   2  270.87   49.60
  -3 -11  -2  305.87   19.70
   3  11   2  324.57   21.90
   3  11   2  320.37   15.70
   5 -11   2  198.78   48.30
  -5 -11  -2  208.68   40.60
  -5 -11  -2  264.47   18.00
   5  11   2  260.27   20.00
   5  11   2  276.17   13.60
  -7 -11  -2   46.10    7.50
   7  11   2   48.10    8.70
   7  11   2   65.99    7.40
  -9 -11  -2   -3.30    5.60
   9  11   2    4.60    6.40
   9  11   2    3.50    3.20
 -11 -11  -2    6.60    6.40
 -11 -11  -2   26.00   15.80
  11  11   2   15.20    7.50
  11  11   2   18.70    4.90
 -13 -11  -2   -1.30    6.30
  13  11   2    0.10    7.10
  15  11   2   -7.80    7.20
  17  11   2  -13.20    7.50
 -16 -12   2   -5.40    6.10
 -16  12   2    0.90    3.70
  16  12  -2   -1.80    7.30
 -14 -12   2   82.79   13.90
  14  12  -2  102.79   17.60
 -14  12   2   94.49    9.60
 -12 -12   2   90.19   13.60
  12  12  -2   66.29   11.20
 -10 -12   2  207.18   17.00
 -10  12   2  238.78   13.10
  10  12  -2  217.28   21.00
  -8 -12   2   15.10    5.90
  -8 -12   2    9.60   18.20
  -8  12   2   22.70    3.80
   8  12  -2   16.30    7.40
   6 -12  -2   39.90   19.90
  -6 -12   2   59.39   11.00
   6  12  -2   75.59   13.80
  -6  12   2   65.99    7.50
   4 -12  -2    2.60    5.20
  -4 -12   2   29.90   19.20
  -4 -12   2   18.90    5.60
   4 -12  -2   27.70   17.50
  -4  12   2   13.30    3.50
   4  12  -2   15.90    6.40
  -4  12   2   19.70    6.10
  -2 -12   2   29.80   18.50
   2 -12  -2   -1.20    4.80
  -2 -12   2   -0.80    4.70
   2 -12  -2   16.70   16.90
   2  12  -2    8.50    5.40
  -2  12   2    1.20    2.90
  -2  12   2    9.60    5.20
   0 -12   2   -7.50    4.30
   0 -12  -2   24.10   18.90
   0 -12   2   24.30   18.10
   0 -12  -2   -8.70    4.60
   0  12   2   -4.40    2.80
   0  12   2   -3.30    4.30
   0  12  -2   -5.10    4.10
  -2 -12  -2  115.39   13.20
   2 -12   2  119.29   11.80
   2  12   2  104.49   11.50
   2  12   2  113.29   14.30
  -2  12  -2  122.29   13.10
   4 -12   2   43.50   21.20
  -4 -12  -2   36.10   18.20
  -6 -12  -2   25.10   16.40
  -6 -12  -2   -6.00    5.50
   6  12   2   -1.50    5.70
  -8 -12  -2   -2.30    5.90
  -8 -12  -2   33.30   17.00
   8  12   2    3.60    7.00
 -10 -12  -2   51.99    8.80
 -10 -12  -2   34.30   17.70
  10  12   2   54.59   10.60
 -12 -12  -2   38.90   19.00
 -12 -12  -2   40.30    8.70
  12  12   2   47.00   10.60
 -14 -12  -2   45.20    8.90
 -14 -12  -2   24.20   18.00
  14  12   2   52.39   11.00
 -13 -13   2  113.59   14.90
  13  13  -2  150.48   19.20
 -13  13   2  128.89   13.70
 -11 -13   2  281.17   20.40
  11  13  -2  322.47   24.50
  -9 -13   2  150.48   49.70
  -9 -13   2  220.28   17.60
   9  13  -2  248.18   21.50
  -7 -13   2  137.99   15.10
   7  13  -2  171.08   18.30
  -5 -13   2   17.00   20.60
  -5 -13   2    0.40    5.30
   5  13  -2    5.90    6.10
  -3 -13   2   27.40   20.40
   1 -13  -2  295.07   48.50
  -1 -13   2  367.06   20.70
   1 -13  -2  335.97   21.10
  -1 -13   2  285.27   58.59
   1  13  -2  391.26   23.50
  -1  13   2  364.56   23.80
   1 -13   2  280.27   17.70
  -1 -13  -2  217.88   45.20
   1 -13   2  228.98   52.79
  -1 -13  -2  252.67   18.50
   1  13   2  290.87   21.20
  -1  13  -2  291.97   19.80
   3 -13   2  282.17   56.49
  -3 -13  -2  346.67   21.40
   3  13   2  372.26   24.20
  -5 -13  -2   47.00    8.00
   5  13   2   50.99    9.30
  -7 -13  -2   17.90    7.00
  -7 -13  -2   35.30   18.60
   7  13   2   30.60    8.50
  -9 -13  -2   12.20    6.90
  -9 -13  -2   32.90   19.80
   9  13   2   14.20    7.80
 -11 -13  -2   76.49   14.30
  11  13   2   67.09   12.00
  -8 -14   2   25.20    7.30
  -8 -14   2   46.10   21.50
   8  14  -2   34.00    8.70
  -4 -14   2   39.60   23.00
   4  14  -2    0.80    6.40
   0 -14  -2  105.19   15.00
   0 -14   2  123.99   14.60
   0 -14  -2  187.68   44.20
   0  14  -2  153.78   16.40
   0  14   2  146.39   17.30
   2 -14   2  167.28   53.39
  -4 -14  -2  155.98   43.90
  -4 -14  -2  185.18   17.40
   4  14   2  223.68   20.50
   6  14   2   -4.50    6.50
 -28   0   3   -5.40    3.80
 -26   0   3   -4.20    3.60
 -24   0   3   -0.40    3.80
 -22   0   3   -5.40    2.80
 -20   0   3   -3.10    2.60
 -18   0   3   -0.10    2.20
 -16   0   3    0.50    1.80
 -14   0   3    2.20    1.50
 -12   0   3    0.30    1.10
 -10   0   3   -1.10    1.20
  -8   0   3   -0.90    1.00
  -8   0   3    1.40    0.80
  -6   0   3    1.00    0.70
  -4   0   3   -2.00    0.70
  -4   0   3   -3.90    1.00
   2   0  -3   -5.60    2.40
  -2   0   3   -3.90    0.60
   0   0   3   -0.40    0.60
   0   0   3    0.50    0.90
   0   0  -3   -2.00    4.00
   0   0  -3    0.10    0.70
  -2   0  -3    0.50    6.30
  -2   0  -3   -0.60    0.70
   2   0   3   -2.00    0.70
   4   0   3   -1.00    0.80
  -4   0  -3   -0.20    0.80
   4   0   3    1.20    1.20
  -6   0  -3   -0.50    1.00
  -6   0  -3   -5.20    5.60
   6   0   3   -0.90    1.00
   8   0   3   -2.20    1.20
   8   0   3    0.10    1.40
  -8   0  -3    2.00    7.60
  -8   0  -3   -2.00    1.30
  10   0   3    1.70    1.60
 -10   0  -3    0.30    1.40
  10   0   3   -0.20    1.50
 -10   0  -3   -3.30    8.30
  12   0   3    0.60    1.80
 -12   0  -3    0.00    1.70
  12   0   3   -0.90    1.70
 -12   0  -3    2.50    7.70
  14   0   3   -4.30    2.10
 -14   0  -3   -2.10    2.00
  14   0   3    2.30    2.20
 -14   0  -3    4.40    8.20
 -16   0  -3   -4.40    2.30
 -16   0  -3   -2.10    8.90
  16   0   3   -2.40    2.50
 -18   0  -3   -5.10    2.50
  18   0   3   -0.40    2.90
 -18   0  -3   -2.00    9.30
  20   0   3    0.50    3.10
 -20   0  -3    0.70    3.20
  22   0   3    1.30    4.00
 -22   0  -3   -0.30    3.50
 -24   0  -3    0.30    4.00
  24   0   3    0.80    4.00
 -29  -1   3   42.50    6.30
 -29   1   3   43.40    6.60
  29   1  -3   70.29    9.80
 -27  -1   3   98.79   10.70
 -27   1   3   95.89   10.80
  27   1  -3  104.29   10.00
 -25  -1   3  308.57   16.90
 -25   1   3  284.47   16.90
 -23  -1   3   -1.10    3.20
 -23   1   3   -3.20    3.10
 -21  -1   3   19.70    3.70
 -21   1   3   17.50    3.70
 -19  -1   3 1176.58   47.40
 -19   1   3 1170.08   47.50
 -17  -1   3  879.11   38.00
 -17  -1   3  947.71   38.00
 -17   1   3  973.00   38.20
  17   1  -3  943.21   40.60
 -15  -1   3 1635.94   70.99
 -15  -1   3 1829.52   70.49
 -15   1   3 1821.82   70.59
  15   1  -3 1970.80   74.69
 -13  -1   3 1464.15   59.59
 -13  -1   3 1538.45   58.79
 -13   1   3 1532.15   58.89
 -11  -1   3  435.26   18.00
 -11  -1   3  430.96   18.60
 -11   1   3  444.66   18.20
  -9  -1   3   19.00    3.00
  -9  -1   3   20.10    2.30
  -9   1   3   22.50    2.40
  -7  -1   3 1654.13   65.99
  -7  -1   3 1691.43   66.49
  -7   1   3 1656.73   66.29
  -7   1   3 1906.21   71.09
  -7   1   3 1753.82   65.99
  -5  -1   3 1538.85   59.99
   5  -1  -3 1621.64   64.79
  -5  -1   3 1613.14   60.59
  -5   1   3 1592.84   60.29
  -5   1   3 1533.75   60.39
   3  -1  -3 2808.42   98.99
  -3  -1   3 2387.76   93.39
  -3   1   3 2175.08   93.19
   1  -1  -3  827.12   35.60
   1   1  -3  667.43   32.80
   1  -1   3 1592.24   60.29
   1  -1   3 1545.95   59.89
   1   1   3 1508.85   60.59
  -1   1  -3 1563.54   59.99
  -1   1  -3 1759.52   65.79
   1   1   3 1484.05   60.09
   3  -1   3   82.59    4.70
   3  -1   3   68.29    3.80
  -3  -1  -3   75.79    4.30
   3   1   3   72.79    4.20
  -3   1  -3   71.99    4.00
   3   1   3   79.39    4.70
  -5  -1  -3 2130.09   80.39
   5  -1   3 2098.59   79.89
  -5   1  -3 2067.99   80.19
   5   1   3 2084.69   79.99
   5   1   3 2083.29   80.59
   7  -1   3  632.64   25.40
  -7  -1  -3  653.03   26.10
   7   1   3  652.03   26.20
  -7   1  -3  630.04   25.90
   7   1   3  633.84   25.60
  -9  -1  -3 3836.62  149.39
  -9   1  -3 4187.28  157.88
   9   1   3 3863.81  149.39
  -9   1  -3 3821.42  149.19
   9   1   3 3824.72  148.89
 -11  -1  -3 1566.34   60.49
  11   1   3 1575.24   59.99
 -11   1  -3 1585.84   60.49
 -11   1  -3 1328.07   68.49
  11   1   3 1622.94   60.59
 -13  -1  -3  743.73   32.20
  13   1   3  805.92   32.30
  13   1   3  786.32   31.80
 -13   1  -3  768.62   32.20
  15  -1   3  287.27   14.50
 -15  -1  -3  291.57   14.90
  15   1   3  306.17   14.90
  15   1   3  309.47   14.50
 -15   1  -3  282.57   14.90
  17  -1   3    0.30    2.90
 -17  -1  -3    0.80    2.60
 -17   1  -3   -0.50    2.70
  17   1   3   -1.90    2.50
 -17   1  -3  -10.10   10.30
 -19  -1  -3  300.57   16.50
  19  -1   3  310.37   16.30
  19   1   3  326.47   16.30
 -19   1  -3  297.97   16.60
 -21  -1  -3  330.77   18.20
  21  -1   3  335.97   17.90
  21   1   3  349.37   17.90
 -21   1  -3  322.97   18.10
  23  -1   3   59.39    9.60
 -23  -1  -3   58.39    9.50
 -23   1  -3   59.69    9.50
  23   1   3   64.59    9.80
  25  -1   3   99.79   11.20
 -25  -1  -3   75.89   11.10
 -25   1  -3   87.79   11.10
  25   1   3   84.29   11.00
 -28  -2   3   45.10    6.20
  28   2  -3   60.19    9.10
 -28   2   3   32.50    5.90
 -26  -2   3  223.48   14.50
 -26   2   3  238.68   15.10
  26   2  -3  238.58   13.90
 -24  -2   3   31.50    4.70
  24   2  -3   31.80    4.40
 -24   2   3   33.20    5.00
 -22  -2   3   56.19    7.30
 -22   2   3   36.60    4.80
  22   2  -3   49.10    6.80
 -20  -2   3  396.36   17.30
 -20   2   3  357.96   17.40
 -20   2   3  300.17   34.70
 -18  -2   3 1736.73   71.09
 -18  -2   3 1912.81   70.79
 -18   2   3 1648.04   83.79
 -18   2   3 1847.92   70.89
  18   2  -3 1846.82   74.19
 -16  -2   3 2208.78   83.59
 -16  -2   3 2061.59   84.69
  16   2  -3 2181.48   88.09
 -16   2   3 2164.58   83.79
 -14  -2   3 2561.14  103.59
 -14  -2   3 2750.12  102.29
  14   2  -3 2912.71  107.79
 -14   2   3 2693.03  102.49
 -14   2   3 2392.96  120.59
 -12  -2   3 2021.50   80.79
 -12  -2   3 2074.89   79.29
 -12   2   3 2094.69   79.69
 -10  -2   3  297.47   13.80
 -10  -2   3  287.57   12.50
 -10   2   3  302.57   12.90
  -8  -2   3   69.79    3.80
  -8  -2   3   66.89    5.00
  -8   2   3   67.69    4.30
  -8   2   3   87.89   11.20
  -6  -2   3 4933.31  183.38
  -6  -2   3 4744.43  182.38
  -6   2   3 4793.02  182.98
  -6   2   3 4833.12  182.58
  -4  -2   3 2112.09   81.19
   4  -2  -3 2261.87   87.99
  -4   2   3 1976.00   80.89
  -2  -2   3 3488.35  122.79
  -2   2   3 3116.29  122.69
  -2   2   3 3063.49  122.39
   0  -2  -3   14.70    6.50
   0  -2   3    6.30    1.50
   0   2   3    6.60    1.50
   0   2   3    6.30    1.30
   2  -2   3  333.17   13.30
  -2   2  -3  324.97   12.90
  -2   2  -3  284.77   21.80
   2   2   3  324.77   14.00
   2   2   3  324.17   13.30
   4  -2   3 1400.56   51.89
  -4  -2  -3 1376.26   52.49
   4   2   3 1321.67   51.99
   4   2   3 1314.27   52.99
  -4   2  -3 1338.77   51.99
  -6  -2  -3 1982.90   73.99
   6   2   3 1926.41   74.69
   6   2   3 1867.71   73.49
  -6   2  -3 1881.61   73.59
  -8  -2  -3 5169.78  191.78
   8   2   3 4995.80  191.18
   8   2   3 4995.20  192.38
  -8   2  -3 4965.60  191.38
 -10  -2  -3 2057.69   76.79
 -10   2  -3 1786.92   86.99
 -10   2  -3 1976.80   76.49
  10   2   3 2029.90   76.19
  10   2   3 1995.00   77.39
 -12  -2  -3 2106.79   82.29
 -12   2  -3 2094.39   82.09
  12   2   3 2113.39   81.69
  12   2   3 2118.59   82.79
 -14  -2  -3  935.91   38.70
 -14   2  -3  909.71   38.50
  14   2   3  949.80   38.00
  14   2   3  951.90   39.10
 -16  -2  -3  311.17   16.10
 -16   2  -3  314.67   16.00
  16   2   3  317.57   16.60
  16   2   3  317.67   15.50
 -18  -2  -3  331.97   17.10
 -18   2  -3  307.47   16.80
  18   2   3  336.87   16.50
  20  -2   3  196.78   12.80
 -20  -2  -3  193.78   13.00
  20   2   3  199.68   12.60
 -20   2  -3  196.28   13.00
 -22  -2  -3  116.19   11.20
  22  -2   3  127.89   11.10
 -22   2  -3  123.29   11.30
  22   2   3  129.79   11.10
  24  -2   3   18.50    4.90
 -24  -2  -3   14.90    4.80
 -24   2  -3   13.90    5.00
  24   2   3   14.80    4.80
 -27  -3   3   -1.80    3.60
 -27   3   3   -4.00   13.50
 -27   3   3    0.70    4.00
  27   3  -3    2.10    3.50
 -25  -3   3    2.20    3.50
 -25   3   3    2.40    3.80
 -25   3   3    4.70   13.30
  25   3  -3    6.50    3.50
 -23  -3   3   88.59    8.60
  23   3  -3   76.89    8.00
 -23   3   3   76.89    8.70
 -21  -3   3  285.57   14.80
 -21   3   3  293.57   15.30
  21   3  -3  279.67   14.20
 -19  -3   3  416.46   17.90
 -19  -3   3  363.36   19.00
  19   3  -3  341.37   21.70
  19   3  -3  413.46   17.30
 -19   3   3  347.37   37.10
 -19   3   3  395.76   18.30
 -17  -3   3  568.94   27.10
 -17  -3   3  607.74   25.40
  17   3  -3  675.83   31.30
 -17   3   3  577.94   25.70
  17   3  -3  591.94   24.80
 -15  -3   3  464.55   22.10
 -15  -3   3  479.05   19.90
  15   3  -3  454.35   19.30
 -15   3   3  463.55   20.20
 -13  -3   3  227.68   10.70
 -13  -3   3  222.18   13.20
  13   3  -3  274.37   17.90
 -13   3   3  226.88   11.10
  13   3  -3  218.88   10.30
 -11  -3   3 1487.45   56.69
 -11  -3   3 1440.76   58.69
 -11   3   3 1492.85   57.29
  11   3  -3 1444.46   56.29
   9  -3  -3  172.48   17.90
  -9  -3   3  220.88   11.20
  -9  -3   3  212.18    9.20
  -9   3   3  211.88   17.30
  -9   3   3  211.48    9.90
   9   3  -3  217.28    8.90
  -7  -3   3   44.00    4.90
  -7  -3   3   46.50    2.90
  -7   3   3   47.00    3.90
  -7   3   3   45.60    9.90
   7   3  -3   50.39    2.70
  -5  -3   3  583.44   23.80
  -5   3   3  572.84   23.20
  -3  -3   3 1222.48   45.60
  -3   3   3 1135.89   45.40
  -3   3   3 1133.29   45.10
  -1  -3   3  284.27   11.90
   1  -3  -3  255.87   18.50
  -1   3   3  271.57   11.60
  -1   3   3  272.87   12.30
   1  -3   3  552.34   21.40
   1   3   3  508.55   21.20
   1   3   3  542.35   22.50
  -1   3  -3  515.35   20.60
   3  -3   3  199.68   18.20
   3  -3   3  161.88    7.70
  -3  -3  -3  163.08   14.60
   3   3   3  160.38    7.80
  -3   3  -3  161.18    7.40
   3   3   3  163.78    9.20
  -5  -3  -3  647.04   26.70
   5  -3   3  673.73   25.90
   5   3   3  648.24   26.30
  -5   3  -3  643.24   26.20
   5   3   3  681.23   28.10
  -7  -3  -3 1844.82   71.49
   7   3   3 1820.62   70.89
   7   3   3 1878.41   72.99
  -7   3  -3 1818.22   70.99
  -9  -3  -3 1763.12   71.29
   9  -3   3 2066.89   80.59
  -9   3  -3 1741.03   70.89
   9   3   3 1766.42   70.79
   9   3   3 1815.22   72.79
 -11  -3  -3  814.12   33.70
 -11   3  -3  828.42   48.90
  11   3   3  817.02   35.20
  11   3   3  827.62   33.10
 -11   3  -3  804.82   33.40
 -13  -3  -3  851.81   34.60
 -13   3  -3  806.52   34.30
  13   3   3  830.82   33.90
  13   3   3  830.12   35.90
 -15  -3  -3  653.13   28.00
  15   3   3  643.24   27.20
 -15   3  -3  630.24   27.70
  15   3   3  633.54   29.10
 -17  -3  -3   -0.50    2.90
 -17   3  -3    3.90    2.80
 -17   3  -3    3.50   12.10
  17   3   3    1.70    3.30
  17   3   3   -3.10    2.90
 -19  -3  -3   29.60    4.60
 -19   3  -3    4.80   13.10
  19   3   3   20.80    4.10
 -19   3  -3   23.60    4.30
 -21  -3  -3    5.70    3.90
 -21   3  -3    4.10   14.80
 -21   3  -3    3.60    3.90
  21   3   3   12.90    3.90
 -23  -3  -3   18.50    4.90
  23  -3   3   19.80    5.10
 -23   3  -3    1.00   15.90
  23   3   3   31.60    5.00
 -23   3  -3   15.60    4.90
 -25  -3  -3   73.19   11.20
  25  -3   3   85.19   11.10
  25   3   3   88.59   11.00
 -25   3  -3   75.89   11.40
 -28  -4   3  304.27   17.80
  28   4  -3  320.07   16.90
 -28   4   3  286.37   18.10
 -26  -4   3  280.47   16.30
 -26   4   3  272.47   16.60
  26   4  -3  290.17   15.40
 -24  -4   3  369.66   18.50
  24   4  -3  366.66   17.60
 -24   4   3  345.07   18.80
 -22  -4   3  102.89    8.90
 -22   4   3  110.59    9.40
  22   4  -3  109.89    8.50
 -20  -4   3    6.90    2.90
 -20  -4   3    0.60    3.80
  20   4  -3    2.40    2.60
 -20   4   3    7.60    3.00
 -20   4   3   16.60   12.10
  20   4  -3    3.70    4.90
 -18  -4   3    7.80    4.30
 -18  -4   3   16.30    3.00
 -18   4   3   27.50   11.90
  18   4  -3   13.60    5.70
  18   4  -3   10.90    2.70
 -18   4   3   15.80    3.00
 -16  -4   3  101.99    6.80
 -16  -4   3   91.09    9.40
  16   4  -3   82.69   11.80
  16   4  -3   95.89    6.20
 -16   4   3   88.99    6.90
 -14  -4   3   81.59    8.60
 -14  -4   3   66.19    5.20
  14   4  -3   76.99   12.50
 -14   4   3   55.89    5.60
  14   4  -3   68.09    4.80
  12   4  -3   37.90    6.80
 -12   4   3   25.00    7.40
 -10  -4   3  143.19    9.50
 -10  -4   3  117.79    6.40
  10   4  -3  117.99    6.00
  -8  -4   3 2208.58   86.29
  -8  -4   3 2150.88   84.09
  -8   4   3 2381.56   92.69
  -8   4   3 2182.98   84.89
   8   4  -3 2096.29   83.79
  -6  -4   3 3018.50  115.59
   6  -4  -3 3272.57  122.89
  -6   4   3 2985.10  114.49
  -6   4   3 2911.51  114.39
   6   4  -3 2792.72  113.39
   4  -4  -3 4714.73  177.98
  -4  -4   3 3820.12  173.48
  -4  -4   3 4771.22  170.88
  -4   4   3 4582.94  170.58
  -4   4   3 4473.85  169.98
   2  -4  -3 3928.71  156.68
  -2  -4   3 3987.10  149.79
  -2   4   3 3934.41  150.28
  -2   4   3 3840.22  149.09
   0  -4   3 3506.25  132.29
   0   4   3 3434.56  133.59
   0   4  -3 3388.96  131.19
   0   4  -3 3722.23  138.99
   0   4   3 3274.57  131.79
   2  -4   3 1069.69   41.50
  -2  -4  -3 1067.69   42.10
  -2   4  -3 1036.30   40.80
   2   4   3 1084.69   43.60
   2   4   3 1033.00   41.30
   4  -4   3   99.19    5.60
  -4  -4  -3  110.19    6.90
  -4   4  -3   93.99    5.20
   4   4   3   99.59    7.80
   4   4   3   96.29    5.70
   6  -4   3    8.00    1.60
  -6  -4  -3   12.10    2.60
   6   4   3    9.20    1.80
   6   4   3   14.80    3.10
  -6   4  -3    7.60    1.60
 -10  -4  -3   -0.20    1.60
 -10   4  -3   17.00   10.50
  10   4   3    2.30    1.70
 -10   4  -3   -1.40    1.60
  10   4   3    1.00    2.70
 -12  -4  -3    3.10    2.10
 -12   4  -3   -0.90    1.80
  12   4   3    2.10    1.90
  12   4   3   -1.10    3.00
 -14  -4  -3    6.30    2.50
 -14   4  -3    1.40   11.70
  14   4   3    1.60    2.20
  14   4   3   -2.50    3.00
 -14   4  -3    0.40    2.30
 -16  -4  -3  464.75   21.70
  16   4   3  456.65   21.00
  16   4   3  478.85   24.10
 -16   4  -3  465.25   21.80
 -18  -4  -3  454.65   21.90
  18   4   3  447.76   24.00
  18   4   3  477.85   21.30
 -18   4  -3  453.35   22.00
 -20  -4  -3 1110.09   47.60
 -20   4  -3 1136.69   47.80
  20   4   3 1146.19   46.70
 -22  -4  -3  356.36   19.90
 -22   4  -3  363.56   20.40
  22   4   3  388.96   19.40
 -24  -4  -3  341.37   20.10
 -24   4  -3  340.37   20.30
  24   4   3  365.06   19.20
 -27  -5   3  471.25   23.40
 -27   5   3  474.25   24.20
  27   5  -3  461.75   22.40
 -25  -5   3  546.25   26.30
  25   5  -3  601.04   25.70
 -25   5   3  559.84   27.10
 -23  -5   3  398.06   19.40
  23   5  -3  407.36   18.60
 -23   5   3  373.76   19.90
 -21  -5   3   16.40    3.40
 -21  -5   3    9.00    4.60
 -21   5   3   15.30    3.80
  21   5  -3   18.30    3.10
  21   5  -3    9.40    5.80
 -21   5   3    8.90   12.50
 -19  -5   3   -2.80    3.80
 -19  -5   3    4.90    2.70
  19   5  -3    0.30    2.30
 -19   5   3    4.10    2.80
  19   5  -3    0.80    4.70
 -19   5   3    0.60   10.00
 -17  -5   3  263.47   12.90
 -17  -5   3  261.67   16.10
  17   5  -3  236.18   18.80
  17   5  -3  265.67   12.30
 -17   5   3  250.27   13.20
 -15  -5   3  285.27   16.60
 -15  -5   3  294.07   13.40
  15   5  -3  260.77   19.70
  15   5  -3  289.87   12.80
 -15   5   3  279.87   13.90
 -13  -5   3  291.07   17.20
 -13  -5   3  306.17   14.20
 -13   5   3  305.47   14.80
  13   5  -3  312.67   13.70
  13   5  -3  340.87   21.50
 -13   5   3  377.36   27.10
 -11  -5   3   31.40    3.40
 -11  -5   3   35.30    6.60
  11   5  -3   26.10    3.00
 -11   5   3   37.10    4.30
 -11   5   3   17.40    6.20
  11   5  -3   17.80    5.40
  -9  -5   3  523.65   25.10
   9  -5  -3  617.44   34.10
  -9  -5   3  525.35   22.40
   9   5  -3  510.85   22.00
  -9   5   3  569.64   23.30
   9   5  -3  596.04   29.40
  -9   5   3  578.14   32.30
   7  -5  -3 3816.82  143.99
  -7  -5   3 3474.45  135.19
  -7   5   3 3373.86  133.49
  -7   5   3 3453.05  133.49
   7   5  -3 3345.27  132.29
  -5  -5   3 4793.82  179.38
  -5  -5   3 4606.44  176.78
  -5   5   3 4581.64  176.18
  -5   5   3 4447.16  175.28
  -3  -5   3 4548.54  173.38
  -3   5   3 4482.75  172.28
  -3   5   3 4546.94  173.88
   1  -5  -3 3223.98  126.59
  -1  -5   3 3395.56  126.99
  -1   5   3 3418.26  128.49
  -1   5   3 3246.38  126.09
   1   5  -3 3238.88  130.09
   1  -5   3 4916.41  182.38
  -1  -5  -3 4943.31  182.88
  -1  -5  -3 4949.90  191.98
   1   5   3 4853.61  184.78
   1   5   3 4758.92  181.78
  -1   5  -3 4823.82  181.18
  -1   5  -3 4229.78  188.38
   3  -5   3  195.48    9.70
  -3  -5  -3  196.28   10.90
   3   5   3  198.58   12.40
   3   5   3  184.78    9.30
  -3   5  -3  193.98    8.70
   5  -5   3   31.40    3.90
  -5  -5  -3   32.30    6.10
  -5   5  -3   32.30    3.30
   5   5   3   25.00    4.40
   5   5   3   29.00    3.90
   7  -5   3  518.25   37.00
  -7  -5  -3  443.86   20.90
   7   5   3  401.66   18.60
   7   5   3  396.96   22.20
  -7   5  -3  412.06   18.70
  -7   5  -3  519.35   35.80
  -9  -5  -3  154.08    9.10
  -9  -5  -3  172.98   11.10
   9   5   3  168.78   12.40
  -9   5  -3  122.09   25.10
  -9   5  -3  154.28    8.50
   9   5   3  157.78    8.50
 -11  -5  -3   53.69    5.80
 -11   5  -3   54.89    5.50
  11   5   3   51.79    8.60
  11   5   3   55.59    5.50
 -13  -5  -3    7.90    2.60
 -13   5  -3    6.60    2.50
  13   5   3   12.20    2.70
 -13   5  -3   -8.50   11.20
  13   5   3    4.70    4.00
 -15  -5  -3  203.58   11.80
  15   5   3  182.88   14.90
 -15   5  -3  193.88   11.70
  15   5   3  177.18   10.90
 -15   5  -3  208.78   36.70
 -17  -5  -3  548.65   25.00
  17   5   3  550.74   28.40
  17   5   3  569.84   24.30
 -17   5  -3  563.44   25.10
 -17   5  -3  465.15   47.50
 -19  -5  -3  876.01   39.30
 -19   5  -3  918.51   39.50
  19   5   3  915.41   42.60
  19   5   3  943.21   38.60
 -21  -5  -3  961.70   42.90
  21   5   3 1038.50   42.20
 -21   5  -3  987.40   43.30
 -23  -5  -3  516.15   26.60
 -23   5  -3  551.64   27.30
  23   5   3  557.24   25.90
  26   6  -3  262.27   15.20
 -26   6   3  249.68   16.30
 -24  -6   3  163.48   11.60
  24   6  -3  168.08   10.90
 -24   6   3  144.59   12.00
 -22  -6   3  121.89    9.70
  22   6  -3  123.29    8.90
  22   6  -3   94.49   15.40
 -22   6   3  110.39   10.10
 -20  -6   3   -8.00    4.20
 -20  -6   3    1.60    2.70
 -20   6   3   -0.70    2.90
  20   6  -3   -9.50    5.20
 -20   6   3   -9.60    9.70
  20   6  -3   -0.50    2.40
 -18  -6   3   11.70    2.90
 -18  -6   3    4.60    4.50
  18   6  -3    1.50    5.60
  18   6  -3   11.30    2.60
 -18   6   3    9.10    3.00
 -18   6   3   -5.70    9.30
 -16  -6   3    7.00    4.30
 -16  -6   3   12.30    2.60
 -16   6   3    8.80    8.10
  16   6  -3   19.00    6.30
  16   6  -3   12.50    2.40
 -16   6   3    8.90    2.70
 -14  -6   3    0.30    1.80
 -14  -6   3    3.60    3.60
 -14   6   3   -0.40    2.00
 -14   6   3   -4.80    6.10
  14   6  -3    1.00    1.70
  14   6  -3    2.30    4.90
 -12  -6   3   -2.30    3.30
 -12  -6   3    2.10    1.70
  12   6  -3   -3.00    1.50
  12   6  -3   -7.00    4.60
 -12   6   3   -3.10    1.70
 -12   6   3   -3.70    5.90
 -10  -6   3   88.49    9.40
  10  -6  -3  107.79   21.00
 -10   6   3  108.29    7.00
  10   6  -3  114.29   14.30
  10   6  -3   93.09    5.50
   8  -6  -3  435.66   32.90
  -8  -6   3  474.75   22.60
   8   6  -3  483.85   26.70
  -8   6   3  487.15   20.50
  -8   6   3  481.85   20.30
   8   6  -3  460.95   18.80
  -6  -6   3 1806.72   72.19
   6  -6  -3 1887.41   83.59
  -6  -6   3 1829.42   74.69
  -6   6   3 1777.42   70.19
  -6   6   3 1827.02   71.39
   6   6  -3 1722.13   68.99
   4  -6  -3 2271.17   92.19
  -4  -6   3 1921.01   79.49
  -4   6   3 1925.21   77.89
  -4   6   3 1957.60   79.89
   2  -6  -3 1652.23   64.19
  -2  -6   3 1631.24   64.79
  -2   6   3 1664.93   63.39
  -2   6   3 1707.93   66.39
   2   6  -3 1502.35   62.29
   0  -6  -3 1398.96   64.19
   0  -6   3 1245.58   50.49
   0  -6  -3 1261.57   50.69
   0   6   3 1231.78   49.40
   0   6  -3 1253.97   48.70
   0   6   3 1260.07   52.89
   0   6  -3 1181.28   54.49
  -2  -6  -3 1133.29   45.80
   2  -6   3 1110.49   44.90
   2  -6   3 1168.08   59.79
  -2  -6  -3 1109.19   59.39
  -2   6  -3 1115.49   43.50
   2   6   3 1091.49   47.90
   2   6   3 1083.19   43.90
  -4  -6  -3   86.99    8.20
   4  -6   3   74.49    6.50
   4   6   3   75.09    5.70
   4   6   3   97.39    9.70
  -4   6  -3   81.19    5.20
   6  -6   3   33.40    4.60
  -6  -6  -3   26.00    4.50
   6   6   3   33.10    4.30
   6   6   3   22.90    4.90
  -6   6  -3   34.70    3.80
   8  -6   3    1.10   11.50
   8  -6   3    5.60    1.90
  -8  -6  -3    2.90    3.40
   8   6   3   -1.70    3.20
   8   6   3   -1.30    1.80
  -8   6  -3    8.50    8.70
  -8   6  -3    1.20    1.50
 -10  -6  -3    0.40    3.90
  10   6   3    0.60    3.80
 -10   6  -3   -2.70    9.90
  10   6   3    3.90    2.20
  12   6   3    0.50    4.60
  12   6   3    2.30    2.60
 -12   6  -3    6.30    2.40
 -14  -6  -3   24.60    4.00
  14   6   3   18.40    6.10
 -14   6  -3   26.60    3.90
  14   6   3   26.20    3.80
 -16  -6  -3  194.08   12.60
 -16   6  -3  208.48   12.40
 -16   6  -3  207.18   37.10
  16   6   3  190.68   16.70
  16   6   3  198.68   11.80
 -18  -6  -3  400.56   20.80
  18   6   3  426.86   25.50
  18   6   3  420.96   20.10
 -18   6  -3  435.26   21.20
 -20  -6  -3  432.46   22.50
  20   6   3  446.86   27.20
 -20   6  -3  464.35   23.20
  20   6   3  472.15   21.90
 -22  -6  -3  277.67   16.80
  22   6   3  294.97   16.00
 -22   6  -3  260.97   17.50
 -25   7   3    1.10    9.90
 -25   7   3    0.50    3.90
 -23  -7   3   15.80    5.50
 -23   7   3   19.80   10.90
 -23   7   3   24.10    4.60
  23   7  -3   20.40    7.00
 -21  -7   3   14.70    5.60
  21   7  -3   17.00    7.30
 -21   7   3   19.70    4.30
 -21   7   3   12.00    9.90
 -19  -7   3  430.26   24.20
 -19  -7   3  450.35   23.50
 -19   7   3  482.55   37.70
  19   7  -3  474.75   20.40
 -19   7   3  436.16   21.50
 -17  -7   3  129.99   13.50
 -17  -7   3  160.38    9.80
  17   7  -3  162.28    9.10
 -17   7   3  150.28   10.10
 -17   7   3  154.38   24.70
  17   7  -3  143.49   17.70
 -15  -7   3  392.26   17.50
 -15  -7   3  371.26   21.30
 -15   7   3  379.36   18.10
  15   7  -3  395.96   16.80
  15   7  -3  374.06   25.50
 -15   7   3  381.16   32.60
 -13  -7   3  272.17   17.20
  13   7  -3  272.67   21.30
 -13   7   3  259.77   28.40
 -13   7   3  282.07   14.10
  13   7  -3  293.47   12.60
 -11  -7   3  404.46   20.90
  11   7  -3  416.16   16.60
 -11   7   3  407.86   18.10
  11   7  -3  324.47   24.50
  -9  -7   3   85.69    9.80
   9   7  -3   84.59    5.20
  -9   7   3   81.49    6.80
  -9   7   3   70.09    7.40
   7  -7  -3   39.10   12.10
  -7  -7   3   25.20    4.60
  -7   7   3   33.00    4.90
  -7   7   3   33.10    6.20
   7   7  -3   34.90    3.60
   7   7  -3   36.90    7.60
  -5  -7   3   62.69    7.80
  -5   7   3   51.59    5.20
   5   7  -3   52.79    3.80
  -5   7   3   53.59    7.00
   3  -7  -3   34.90    5.70
  -3  -7   3   14.30    3.50
  -3   7   3   31.10    4.30
   3   7  -3   23.50    2.80
  -3   7   3   34.10    6.40
  -1  -7   3   13.60    3.30
   1  -7  -3   15.90    3.30
  -1   7   3   16.10    3.80
   1   7  -3   23.20    2.80
   1  -7   3   69.79    7.50
  -1  -7  -3   77.19    8.30
  -1  -7  -3  115.79   29.60
  -1   7  -3   77.69    5.00
   1   7   3   76.79    6.00
   1   7   3   75.59    9.20
  -1   7  -3   92.29   12.40
  -3  -7  -3   24.70    4.60
   3  -7   3   25.60    3.80
   3  -7   3    9.10   11.20
  -3   7  -3   29.20    3.90
   3   7   3   23.50    5.00
   3   7   3   35.50    4.80
  -3   7  -3   20.10    5.70
   5  -7   3  131.09   33.30
   5  -7   3  136.79    9.20
  -5  -7  -3  137.19   11.40
   5   7   3  120.69   12.50
  -5   7  -3  123.69   19.40
   5   7   3  149.69    8.20
  -5   7  -3  157.38    7.90
   7  -7   3  507.65   22.60
  -7  -7  -3  534.25   25.70
   7   7   3  483.05   27.70
   7   7   3  515.05   22.00
  -7   7  -3  542.75   22.10
  -9  -7  -3  691.73   31.80
  -9   7  -3  715.83   28.30
   9   7   3  619.44   33.90
   9   7   3  643.74   27.80
 -11  -7  -3  803.02   36.40
  11   7   3  782.82   32.40
 -11   7  -3  802.02   32.90
  11   7   3  735.53   38.80
 -13   7  -3  277.87   14.30
  13   7   3  255.67   20.50
  13   7   3  257.37   13.60
 -15   7  -3  137.59   10.10
 -15   7  -3   96.79   32.40
  15   7   3  126.99    9.30
  15   7   3  110.69   15.10
  17   7   3   -4.60    5.20
 -17   7  -3   -6.80   12.50
 -17   7  -3   -2.10    3.10
  17   7   3    5.50    3.20
 -19  -7  -3   -3.00    3.50
 -19   7  -3   -1.30   13.30
  19   7   3    2.80    3.30
 -19   7  -3   -4.50    3.30
  19   7   3   -5.40    5.40
 -21  -7  -3    1.80    3.80
 -21   7  -3   -1.70    4.10
 -21   7  -3   -5.70   13.50
  21   7   3    3.80    3.50
  21   7   3   -5.40    6.00
 -24  -8   3   33.50    7.10
 -24   8   3   59.79    9.20
  24   8  -3   33.40    8.00
 -24   8   3   38.20   12.20
 -22   8   3   -5.10    3.10
 -22   8   3    3.10    9.20
  22   8  -3   -7.00    5.00
 -20  -8   3  146.49   14.20
 -20   8   3  158.58   11.40
  20   8  -3  164.98   17.70
 -20   8   3  173.88   26.90
 -18  -8   3  655.63   32.70
 -18   8   3  718.13   46.80
 -18   8   3  666.13   29.90
 -16  -8   3  988.80   45.00
 -16   8   3  999.60   41.90
 -16   8   3 1051.59   58.09
  16   8  -3 1000.80   50.09
 -14  -8   3  724.43   34.30
 -14   8   3  744.63   31.00
  14   8  -3  693.53   39.00
 -12  -8   3  563.64   28.50
  12   8  -3  580.24   33.50
 -12   8   3  586.84   25.10
 -10  -8   3   23.40    4.90
  10   8  -3   33.50    7.70
 -10   8   3   23.60    3.40
  10   8  -3   31.00    5.00
   8  -8  -3  119.79   30.30
  -8  -8   3  140.09   11.40
   8   8  -3  132.79    7.10
  -8   8   3  132.89    8.60
  -8   8   3  129.69   10.20
   8   8  -3   93.69   14.50
  -6  -8   3  513.85   24.40
   6  -8  -3  496.15   42.20
  -6   8   3  517.65   21.90
  -6   8   3  526.45   24.70
   6   8  -3  457.05   28.10
   6   8  -3  492.95   20.40
   4  -8  -3  452.85   40.30
  -4  -8   3  447.66   21.90
   4  -8  -3  442.36   20.80
   4   8  -3  417.56   18.10
  -4   8   3  456.55   19.60
  -4   8   3  472.35   23.20
   4   8  -3  416.56   25.80
  -2  -8   3  507.35   40.00
  -2  -8   3  586.54   26.20
   2  -8  -3  594.84   26.00
   2  -8  -3  552.34   44.90
   2   8  -3  546.15   29.80
   2   8  -3  562.64   22.90
  -2   8   3  603.34   24.20
  -2   8   3  587.14   28.30
   0  -8   3  377.16   18.90
   0  -8  -3  371.46   19.40
   0   8  -3  387.56   16.10
   0   8   3  391.16   17.10
   0   8   3  365.26   21.50
  -2  -8  -3    8.40    4.20
   2  -8   3   10.10    3.30
   2  -8   3   -0.80   12.20
  -2  -8  -3   -8.50   12.70
   2   8   3    5.30    4.10
  -2   8  -3    8.00    4.50
   2   8   3    9.80    2.60
  -2   8  -3    8.10    1.80
  -4  -8  -3  103.69   11.40
   4  -8   3  114.69    9.10
   4   8   3   92.49   12.40
  -4   8  -3  124.29    7.10
   4   8   3  115.69    7.70
   6  -8   3  690.53   60.39
   6  -8   3  842.02   34.60
  -6  -8  -3  851.31   37.40
   6   8   3  810.62   33.30
   6   8   3  792.62   39.80
  -6   8  -3  887.31   33.60
  -8  -8  -3 1836.62   74.49
   8   8   3 1724.73   70.29
   8   8   3 1729.73   77.49
  -8   8  -3 1910.61   70.89
 -10  -8  -3  485.85   25.40
 -10   8  -3  477.45   21.00
  10   8   3  439.06   20.40
  10   8   3  430.76   27.40
 -12  -8  -3  722.23   34.80
  12   8   3  701.43   30.10
 -12   8  -3  746.93   31.00
  12   8   3  689.03   37.80
  14   8   3  102.49    8.50
  14   8   3   78.29   14.80
 -14   8  -3   97.39    9.00
 -16   8  -3   -9.80   11.40
  16   8   3    8.40    3.40
  16   8   3    4.20    6.50
 -16   8  -3    1.40    3.40
  18   8   3   27.80    8.20
 -18   8  -3   27.50    5.00
  20   8   3  210.68   13.50
  20   8   3  204.98   20.80
 -20   8  -3  225.08   15.00
 -23  -9   3   -0.30    5.70
  23   9  -3    8.20    7.20
 -23   9   3   16.20   11.00
 -23   9   3   12.10    4.40
 -21  -9   3    6.40    5.90
 -21   9   3    9.00    4.10
  21   9  -3   13.80    7.20
 -21   9   3   13.00   11.00
 -19  -9   3   41.40    7.10
 -19   9   3   37.90    5.10
  19   9  -3   49.70    9.30
 -19   9   3   75.79   24.80
 -17  -9   3  232.08   17.10
 -17   9   3  235.58   14.00
  17   9  -3  273.67   21.80
 -15  -9   3  288.37   19.00
 -15   9   3  299.07   15.60
  15   9  -3  319.07   23.90
 -13  -9   3  157.68   14.70
 -13   9   3  173.58   10.80
  13   9  -3  195.38   19.50
 -11  -9   3  422.56   23.20
  11   9  -3  413.36   27.50
 -11   9   3  414.36   19.40
  -9  -9   3   26.10    5.80
   9   9  -3   18.40    7.50
  -7  -9   3  327.87   19.30
   7  -9  -3  330.27   42.30
   7   9  -3  335.47   23.70
  -7   9   3  355.16   19.40
  -7   9   3  348.07   16.20
  -5  -9   3  518.95   25.10
   5  -9  -3  576.04   49.00
  -5  -9   3  445.86   40.40
  -5   9   3  533.05   26.50
   5   9  -3  503.05   29.30
  -5   9   3  514.35   22.40
   3  -9  -3  264.47   16.60
  -3  -9   3  305.97   16.80
  -3  -9   3  300.87   36.70
  -3   9   3  263.97   18.40
  -3   9   3  290.37   14.30
   3   9  -3  324.67   21.50
   1  -9  -3  543.55   49.10
   1  -9  -3  440.46   23.40
  -1  -9   3  464.25   23.00
  -1  -9   3  492.45   46.90
  -1   9   3  416.36   25.50
  -1   9   3  481.95   20.90
   1   9  -3  462.55   27.20
   1  -9   3   27.50   16.70
  -1  -9  -3   47.30    6.70
  -1  -9  -3   47.50   17.20
   1   9   3   50.99    8.20
  -1   9  -3   36.30    7.50
   3  -9   3  -12.30   15.60
   3  -9   3    7.10    3.90
  -3  -9  -3   -2.70   15.40
  -3  -9  -3   -3.00    4.50
   3   9   3    3.60    2.70
   3   9   3   -3.20    4.60
  -3   9  -3   -8.80    4.50
  -5  -9  -3   72.69   18.80
   5  -9   3   68.99    8.70
  -5  -9  -3   78.49   11.80
   5   9   3   61.19    7.10
  -5   9  -3   61.19    6.10
  -5   9  -3   90.79   11.60
  -7  -9  -3  260.07   42.30
  -7  -9  -3  304.27   19.40
  -7   9  -3  335.37   15.00
   7   9   3  304.27   14.90
   7   9   3  286.97   21.40
  -9  -9  -3  154.98   14.80
  -9   9  -3  181.98   10.40
   9   9   3  159.38   10.10
   9   9   3  138.89   16.20
 -11  -9  -3  412.76   24.20
  11   9   3  389.96   26.70
 -11   9  -3  429.76   19.90
  11   9   3  420.16   19.20
 -13  -9  -3   21.50    6.70
  13   9   3   24.90    8.10
 -13   9  -3   29.40    4.30
  13   9   3   45.90    7.00
  15   9   3  125.49   17.90
 -15   9  -3  159.78   11.50
  15   9   3  149.29   10.50
  17   9   3  108.29   10.00
 -17   9  -3  118.39   10.80
 -19   9  -3  198.18   13.80
  19   9   3  158.58   20.90
  19   9   3  165.08   12.70
 -20 -10   3    0.70    5.80
 -20  10   3   10.00    4.00
  20  10  -3    6.00    7.10
 -18 -10   3    5.60    5.80
  18  10  -3    8.80    7.40
 -18  10   3    9.20    3.70
 -16 -10   3   27.20    6.40
  16  10  -3   27.20    7.90
 -16  10   3   25.70    4.10
 -14 -10   3    5.60    5.00
 -14  10   3    7.60    3.10
  14  10  -3    5.80    6.00
 -12 -10   3   -4.30    4.50
 -12  10   3    0.50    2.50
  12  10  -3   -5.20    5.50
 -10 -10   3   39.30    6.80
  10  10  -3   25.90    8.00
  -8 -10   3    6.10   11.70
   8 -10  -3   -9.10   17.00
  -8 -10   3   -5.20    4.50
  -8  10   3    0.60    2.50
   8  10  -3   -8.90    5.70
  -6 -10   3  211.28   34.40
  -6 -10   3  137.39   13.80
   6 -10  -3  166.58   42.50
  -6  10   3  151.28   14.00
   6  10  -3  137.49   18.20
  -6  10   3  181.78   10.50
  -4 -10   3   -3.10    4.30
   4 -10  -3   25.80   17.70
  -4 -10   3   -8.00   14.30
  -4  10   3    4.40    2.80
   4  10  -3   -7.50    5.90
  -4  10   3   -6.10    4.50
  -2 -10   3    2.40   16.70
  -2 -10   3    1.00    4.30
  -2  10   3    0.40    2.70
   2  10  -3   -5.40    5.40
   0 -10   3    2.30    4.20
   0 -10   3  -10.60   17.40
   0  10   3   -0.20    2.80
   0  10  -3    1.30    5.60
  -2 -10  -3    9.20    5.90
   2 -10   3   25.50    5.10
  -2 -10  -3   32.40   17.80
   2 -10   3   12.50   19.70
  -2  10  -3   16.00    6.10
   2  10   3   22.50    3.60
   2  10   3   10.10    6.20
   4 -10   3    4.10   17.10
   4 -10   3   -2.50    3.80
  -4 -10  -3   13.70   16.00
   4  10   3   -2.40    2.70
  -4  10  -3   -3.00    4.50
   4  10   3   -4.80    4.70
   6 -10   3    9.60   19.40
  -6 -10  -3    9.10   15.20
  -6 -10  -3    7.10    5.30
   6  10   3   14.70    3.40
   6  10   3    6.70    5.80
  -8 -10  -3   82.79   12.60
   8  10   3   94.49    8.10
   8  10   3   86.99   14.30
 -10 -10  -3   31.00    7.00
 -10 -10  -3   15.40   15.30
  10  10   3   41.80    6.80
  10  10   3   35.60    8.30
 -10  10  -3   34.20    5.60
 -12 -10  -3  180.28   17.20
  12  10   3  170.88   19.20
 -12  10  -3  191.98   12.80
  12  10   3  187.18   11.60
 -14  10  -3   25.70    4.60
  14  10   3   27.10    4.40
  14  10   3   22.60    8.60
 -16  10  -3    5.50    3.90
  16  10   3    2.10    3.70
  16  10   3    2.80    7.40
 -18  10  -3    0.70    4.10
  18  10   3   -5.50    3.60
  18  10   3   -9.10    7.30
 -19 -11   3  247.58   18.70
 -19  11   3  216.28   14.70
  19  11  -3  262.37   23.10
 -17 -11   3  625.94   32.20
  17  11  -3  629.44   37.10
 -17  11   3  633.34   28.70
 -15 -11   3  411.66   24.20
 -15  11   3  426.36   20.60
 -13 -11   3  378.26   22.90
 -13  11   3  399.76   19.20
 -11 -11   3  131.59   13.80
 -11  11   3  150.68   10.00
  11  11  -3  115.59   17.40
  -9 -11   3   28.40    6.00
  -9 -11   3   27.10   14.90
   9  11  -3   30.20    8.40
  -7 -11   3   -0.60    4.70
  -7 -11   3    8.30   14.80
   7 -11  -3   11.50   17.70
   7  11  -3   -3.30    5.60
  -7  11   3    1.40    2.60
  -5 -11   3  213.88   16.10
  -5  11   3  227.78   12.60
  -5  11   3  232.78   17.30
   5  11  -3  204.78   19.70
  -3 -11   3   16.10    5.60
   3 -11  -3   12.70   16.80
   3 -11  -3   14.30    5.30
   3 -11  -3   12.20   16.80
  -3 -11   3    2.00   15.60
  -3  11   3   15.60    3.40
  -3  11   3   17.30    6.00
   3  11  -3    8.20    6.30
   1 -11  -3  251.37   17.30
  -1 -11   3  260.77   16.90
  -1  11   3  270.37   13.90
   1  11  -3  243.28   19.60
  -1  11   3  255.77   19.40
   1 -11   3   -5.00    4.20
   1 -11   3    9.20   17.70
  -1 -11  -3   22.10   16.70
   1  11   3   -3.10    2.80
   1  11   3   -4.00    4.90
  -1  11  -3   -4.00    4.60
   3 -11   3   23.30   19.30
  -3 -11  -3   14.00    5.90
   3 -11   3   22.60    5.10
  -3 -11  -3   37.80   17.50
   3  11   3   22.60    3.80
  -3  11  -3   21.50    5.80
   3  11   3   18.80    6.90
  -5 -11  -3  176.78   40.40
  -5 -11  -3  190.48   16.50
   5  11   3  190.88   18.50
   5  11   3  214.68   11.90
  -7 -11  -3  833.22   38.90
   7  11   3  814.22   34.20
   7  11   3  792.12   42.10
  -9 -11  -3  409.76   24.40
   9  11   3  403.26   27.60
   9  11   3  403.06   19.30
 -11 -11  -3  671.83   35.10
  11  11   3  674.33   29.70
  11  11   3  710.73   39.40
 -13 -11  -3  142.49   43.20
  13  11   3  215.58   12.60
  13  11   3  192.18   21.70
  15  11   3   43.90   10.50
  15  11   3   53.29    8.30
 -16 -12   3  447.06   26.50
 -16  12   3  442.86   22.40
  16  12  -3  502.65   32.00
 -14 -12   3  268.97   19.70
 -14  12   3  271.77   15.60
  14  12  -3  282.27   24.70
 -12 -12   3  367.36   22.60
 -12  12   3  366.26   18.50
  12  12  -3  349.17   27.30
 -10 -12   3   35.10    7.30
 -10 -12   3   16.10   17.50
  10  12  -3   29.20    9.10
  -8 -12   3    1.40   17.50
  -8 -12   3    1.80    5.40
   8  12  -3   -4.70    5.80
  -8  12   3   -2.50    2.80
   6 -12  -3   24.30   19.50
  -6 -12   3   11.30    5.20
  -6 -12   3   23.40   18.60
   6  12  -3   11.70    6.60
  -6  12   3    5.90    3.20
   4 -12  -3  125.49   39.60
  -4 -12   3  147.09   13.50
  -4  12   3  155.98   10.50
   4  12  -3  162.28   16.80
  -4  12   3  143.59   15.00
   2 -12  -3    8.70    5.60
   2 -12  -3   21.90   17.00
  -2 -12   3   37.50   18.90
  -2 -12   3   13.40    5.40
  -2 -12   3   38.00   19.20
  -2  12   3   17.00    6.10
   2  12  -3   19.80    6.60
  -2  12   3   15.10    3.60
   0 -12  -3   22.60   17.00
   0 -12  -3    8.80    5.70
   0 -12   3   24.30   19.00
   0 -12   3   12.50    5.30
   0  12   3   12.30    3.60
   0  12  -3   17.50    5.90
   0  12   3   16.30    6.50
   2 -12   3   -5.60    4.30
   2 -12   3   10.40   18.20
  -2 -12  -3   20.80   16.70
   2  12   3   -2.60    3.00
   2  12   3   -6.30    5.00
  -2  12  -3    1.70    4.80
  -4 -12  -3  204.68   42.20
   4 -12   3  203.78   50.99
  -4 -12  -3  173.58   16.10
   4  12   3  164.88   17.90
   4  12   3  188.88   11.70
  -6 -12  -3  273.77   19.90
  -6 -12  -3  242.58   43.70
   6  12   3  273.67   15.40
   6  12   3  268.07   22.60
  -8 -12  -3  529.75   29.60
   8  12   3  544.05   33.50
 -10 -12  -3  679.33   35.70
  10  12   3  718.23   40.40
 -12 -12  -3  182.48   49.20
 -13 -13   3   41.20   21.10
 -13 -13   3   31.70    7.60
  13  13  -3   28.30    9.30
 -13  13   3   34.20    5.10
 -11 -13   3   49.00   22.30
 -11 -13   3   28.60    7.30
  11  13  -3   32.40    9.60
 -11  13   3   34.90    5.00
  -9 -13   3   47.10   21.80
  -9 -13   3   25.20    7.20
  -9  13   3   23.10    4.50
   9  13  -3   25.60    9.00
  -7 -13   3   -1.90    5.70
  -7 -13   3   30.20   20.70
  -7  13   3    6.00    3.60
   7  13  -3    6.20    7.20
  -5 -13   3   23.00   21.80
  -5 -13   3   17.50    6.10
  -5  13   3   18.10    4.40
   5  13  -3   21.10    7.10
   3 -13  -3  112.09   38.60
  -3 -13   3  139.09   13.70
   3  13  -3  153.48   16.50
  -3  13   3  129.39   15.80
  -3  13   3  126.19   14.80
  -1 -13   3   20.60   20.80
   1 -13  -3   36.60   18.60
  -1 -13  -3   36.30    7.60
   1 -13   3   41.00   22.10
   1  13   3   51.29    9.20
  -3 -13  -3   36.00    7.90
   3 -13   3   51.39   25.10
  -3 -13  -3   37.50   18.80
   3  13   3   38.30    8.80
  -5 -13  -3   30.00    7.80
   5  13   3   38.40    9.10
  -7 -13  -3   95.79   15.20
   7  13   3  101.39   17.50
   9  13   3   52.19   10.60
  -8 -14   3  113.09   14.80
   8  14  -3  131.49   18.20
  -6 -14   3  311.47   20.80
   6  14  -3  295.67   24.10
  -4 -14   3  559.94   30.10
   4  14  -3  612.04   34.30
   2 -14  -3  130.19   42.20
  -2 -14   3  203.18   16.50
  -2  14   3  193.88   19.20
   2  14  -3  199.98   19.20
   0 -14   3  115.89   13.90
   0 -14  -3  140.39   41.30
   0 -14   3   82.69   28.90
   0  14   3  119.29   17.20
   0  14  -3  143.59   16.50
  -2 -14  -3   42.90   20.60
   2  14   3   71.09   10.80
  -4 -14  -3   27.90   18.40
   4  14   3   -3.10    6.90
 -28   0   4    3.10    4.40
 -26   0   4   86.69    9.80
 -24   0   4  894.01   38.10
 -22   0   4  278.67   14.80
 -20   0   4  921.01   38.10
 -18   0   4  838.82   34.50
 -16   0   4   71.39    5.80
 -14   0   4  313.97   14.00
 -12   0   4  191.28    8.70
 -12   0   4  176.88    8.60
 -10   0   4 4155.98  156.48
 -10   0   4 4086.59  156.48
  -8   0   4 1431.06   55.89
  -8   0   4 1481.45   55.99
  -6   0   4 5877.21  228.08
  -6   0   4 6189.38  228.38
  -4   0   4 2594.14   95.99
  -4   0   4 2429.16   95.49
  -2   0   4  120.99    6.30
  -2   0   4  106.79    5.40
   0   0   4 4529.55  173.18
   0   0   4 4619.14  173.68
  -2   0  -4 1751.22   65.39
   2   0   4 1693.73   64.99
   2   0   4 1664.23   65.39
  -4   0  -4 5727.73  213.18
   4   0   4 5661.33  212.78
   4   0   4 5466.85  213.08
   6   0   4 5525.35  213.68
   6   0   4 5621.14  213.48
  -6   0  -4 5742.83  213.98
  -8   0  -4   33.60   11.10
 -10   0  -4   13.40    2.50
 -10   0  -4    5.10   10.50
  10   0   4   11.20    2.30
  10   0   4   22.80    4.30
 -12   0  -4  733.33   44.00
 -12   0  -4  730.93   30.60
  12   0   4  728.73   30.10
 -14   0  -4 1511.85   62.79
  14   0   4 1628.04   62.19
  14   0   4 1588.74   62.29
 -16   0  -4  914.21   39.80
  16   0   4  987.60   39.40
  18   0   4  428.86   20.10
 -18   0  -4  398.16   20.30
 -20   0  -4  114.09   10.50
  20   0   4  127.69   10.50
 -22   0  -4   16.60    4.60
 -22   0  -4   -8.50   12.80
  22   0   4   16.80    4.50
 -24   0  -4    2.80    4.30
 -24   0  -4   -8.80   13.80
  24   0   4    4.20    4.40
 -29  -1   4   25.60    5.30
  29   1  -4   18.40    4.60
 -29   1   4   17.70    5.30
 -27  -1   4  134.69   11.70
 -27   1   4  135.89   11.70
 -25  -1   4    1.80    3.50
 -25   1   4   -6.60    3.60
 -23  -1   4  402.76   19.50
 -23   1   4  396.26   19.70
 -21  -1   4  272.87   14.10
 -21   1   4  266.47   14.40
 -19  -1   4  299.57   14.70
 -19   1   4  302.77   14.90
 -17  -1   4   70.59    7.10
 -17  -1   4   67.99    6.20
 -17   1   4   69.89    6.10
  17   1  -4   97.49   12.10
 -15  -1   4    0.60    2.50
 -15   1   4   -0.80   10.70
 -15   1   4    2.80    1.90
 -13  -1   4    1.70    1.50
 -13  -1   4    2.10    1.90
 -13   1   4    6.10    1.70
 -11  -1   4  160.18    7.60
 -11  -1   4  155.38    8.20
 -11   1   4  169.28    7.90
  -7  -1   4  698.73   27.60
  -7  -1   4  722.43   28.30
  -7   1   4  697.23   28.00
  -7   1   4  731.43   28.00
  -5  -1   4 2910.41  107.69
  -5  -1   4 2857.81  106.99
  -5   1   4 2707.83  107.39
   3  -1  -4  258.97   20.10
   3   1  -4  258.47   16.80
  -1  -1   4  415.96   16.60
  -1  -1   4  457.75   17.60
  -1   1   4  405.76   17.00
   1  -1   4 1252.17   48.00
   1  -1   4 1275.17   48.60
   1   1   4 1186.58   48.30
   1   1   4 1254.47   48.90
  -1   1  -4 1319.07   48.30
  -3  -1  -4 1767.62   67.59
   3  -1   4 1744.03   66.99
   3  -1   4 1759.72   67.39
   3   1   4 1763.42   67.89
  -3   1  -4 1775.72   67.29
   3   1   4 1717.83   67.19
   5  -1   4 2329.87   89.49
  -5  -1  -4 2354.16   90.09
   5  -1   4 2165.48   95.49
   5  -1   4 2323.47   89.59
   5   1   4 2340.47   89.59
  -5   1  -4 2309.27   89.79
   5   1   4 2375.76   90.29
  -5   1  -4 2544.25   98.69
  -7  -1  -4  488.25   32.30
   7  -1   4  488.75   20.20
   7  -1   4  532.95   20.30
  -7  -1  -4  498.15   20.80
  -7   1  -4  424.16   30.70
  -7   1  -4  488.95   20.50
   7   1   4  491.75   21.00
   7   1   4  523.95   20.40
  -9  -1  -4   31.10    4.30
   9  -1   4   36.70    4.10
  -9  -1  -4   37.40   10.30
   9  -1   4   39.20    4.30
  -9   1  -4   37.90    4.10
   9   1   4   31.10    4.80
  -9   1  -4   21.90    8.60
   9   1   4   30.90    4.00
  11  -1   4  178.88    9.20
 -11  -1  -4  141.59   24.30
 -11  -1  -4  164.78    9.60
  11  -1   4  177.68    9.00
 -11   1  -4  169.38    9.40
  11   1   4  173.88    9.90
  11   1   4  165.48    9.10
 -13  -1  -4  380.06   34.30
  13  -1   4  491.35   19.90
 -13  -1  -4  452.65   20.50
 -13   1  -4  467.85   20.30
  13   1   4  454.35   19.80
 -13   1  -4  374.26   34.10
  13   1   4  489.35   20.50
  15  -1   4  332.57   15.90
 -15  -1  -4  313.07   16.40
 -15   1  -4  324.67   16.30
  15   1   4  342.97   16.40
  15   1   4  325.37   16.00
  17  -1   4   26.60    4.10
 -17  -1  -4   27.40    4.40
  17   1   4   27.70    4.10
 -17   1  -4   21.40    4.00
  19  -1   4   93.19    9.70
 -19  -1  -4  107.39    9.70
 -19   1  -4   95.79    9.70
  19   1   4  114.39    9.50
 -21  -1  -4  102.59   10.50
  21  -1   4   98.59   10.50
 -21   1  -4   97.89   10.50
  21   1   4  111.69   10.60
 -23  -1  -4   -8.30   11.40
  23  -1   4   -1.30    4.00
 -23  -1  -4   -1.60    3.80
  23   1   4    0.50    4.10
 -23   1  -4   -4.40    3.90
  25  -1   4   10.70    5.00
 -25  -1  -4    7.70    4.70
 -25   1  -4    7.00    4.80
  25   1   4   11.50    5.20
 -28  -2   4   84.59   10.10
 -28   2   4   76.69   10.40
  28   2  -4   89.99    9.50
 -26  -2   4    9.70    4.00
  26   2  -4   13.30    3.90
 -26   2   4   14.90    4.40
 -26   2   4    9.90   13.50
 -24   2   4   15.80   13.00
 -24   2   4   32.80    5.00
 -22  -2   4    2.20    3.10
 -22   2   4    4.10   11.10
 -22   2   4    2.10    3.00
 -20  -2   4  115.29    8.40
 -20   2   4  108.19    8.70
 -20   2   4  126.99   27.10
  20   2  -4  113.29   17.20
 -18  -2   4   39.00    5.40
 -18  -2   4   55.59    7.40
 -18   2   4   44.30    5.80
  18   2  -4   34.00    7.20
 -16  -2   4   -5.00    2.90
 -16  -2   4   -2.50    1.90
  16   2  -4   -3.10    5.10
 -16   2   4   -0.50    1.90
 -14  -2   4  283.47   15.60
 -14  -2   4  334.87   14.10
 -14   2   4  334.87   14.60
 -12  -2   4   34.40    3.60
 -12  -2   4   24.40    3.40
 -12   2   4   24.40    7.40
 -10  -2   4  375.46   15.60
 -10  -2   4  381.16   16.70
 -10   2   4  396.56   16.30
  -8  -2   4  306.37   12.50
  -8  -2   4  320.67   13.60
  -8   2   4  303.37   13.20
  -6  -2   4 2229.78   82.89
  -6   2   4 2102.79   82.49
  -6   2   4 2136.69   82.39
   4  -2  -4 4600.64  179.18
  -4  -2   4 4697.13  171.68
  -4   2   4 4434.06  171.48
  -4   2   4 4341.27  171.28
   2   2  -4  285.47   19.30
   0  -2   4  160.78    6.60
   0  -2   4  160.48    7.70
   0   2   4  155.58    7.40
   0   2  -4  161.08    6.70
   0   2   4  163.48    8.00
   2  -2   4  432.36   17.10
  -2  -2  -4  420.46   28.10
  -2   2  -4  396.76   26.00
   2   2   4  408.36   17.70
   2   2   4  413.16   16.90
  -2   2  -4  422.36   16.70
  -4  -2  -4  761.62   40.10
   4  -2   4  788.72   29.70
  -4  -2  -4  755.82   30.10
  -4   2  -4  764.52   29.60
  -4   2  -4  667.43   38.70
   4   2   4  752.62   30.70
   4   2   4  760.12   29.70
  -8  -2  -4   73.49    5.50
   8  -2   4   75.49    5.20
   8   2   4   75.49    5.20
   8   2   4   58.19    6.20
  -8   2  -4   68.69    5.10
 -10  -2  -4    5.80    2.20
  10   2   4    7.20    2.10
  10   2   4    8.40    2.70
 -10   2  -4   -3.50    8.40
 -10   2  -4    7.10    2.00
 -12  -2  -4    3.00    2.40
 -12   2  -4   -3.00    9.30
  12   2   4    1.30    2.20
 -12   2  -4    4.90    2.20
  12   2   4    1.40    2.70
 -14  -2  -4   21.90    3.40
  14   2   4   19.50    3.20
 -14   2  -4   17.20    3.30
  14   2   4   21.90    4.00
 -16  -2  -4  207.58   12.60
  16  -2   4  218.78   12.50
  16   2   4  230.88   12.50
 -16   2  -4  209.58   12.60
  16   2   4  224.48   13.40
 -18  -2  -4   62.99    8.20
  18  -2   4   67.39    8.20
 -18   2  -4   51.79    8.00
  18   2   4   67.69    8.20
  20  -2   4   12.90    4.30
 -20  -2  -4   12.20    4.10
  20   2   4   16.10    4.20
 -20   2  -4   10.90    4.30
 -22  -2  -4   -2.20    3.70
  22  -2   4   -3.20    3.90
  22   2   4   -4.40    3.80
 -22   2  -4   -8.20   14.40
 -22   2  -4   -4.70    3.80
 -24  -2  -4    6.20    4.80
  24  -2   4    5.90    4.70
 -24   2  -4   -3.50   15.20
 -24   2  -4    6.90    4.70
  24   2   4   15.40    4.90
 -29  -3   4  114.49   11.70
  29   3  -4  117.39   10.90
 -29   3   4  110.29   11.80
 -27  -3   4   -3.90    3.40
  27   3  -4   -0.10    3.50
 -27   3   4    1.30   12.90
 -27   3   4    3.20    4.30
 -25  -3   4  186.78   12.30
 -25   3   4  181.78   12.80
  25   3  -4  184.68   11.70
 -23  -3   4  331.97   16.80
  23   3  -4  343.77   16.20
 -23   3   4  322.77   17.30
 -21  -3   4  524.75   22.20
 -21   3   4  403.26   39.00
 -21   3   4  507.15   22.50
  21   3  -4  504.35   21.30
 -19  -3   4  666.23   27.20
 -19  -3   4  577.14   28.60
  19   3  -4  681.03   33.30
 -19   3   4  663.03   27.80
 -19   3   4  604.34   44.00
  19   3  -4  649.43   26.50
 -17  -3   4  294.97   16.30
 -17  -3   4  313.17   14.00
 -17   3   4  284.37   29.10
  17   3  -4  312.97   13.50
  17   3  -4  274.27   20.40
 -17   3   4  309.97   14.60
 -15  -3   4   57.29    4.70
 -15  -3   4   45.40    7.40
 -15   3   4   56.69   18.80
  15   3  -4   35.70    7.00
 -15   3   4   40.80    5.10
 -13  -3   4  410.96   19.90
 -13  -3   4  423.96   17.80
 -13   3   4  476.85   29.90
 -13   3   4  396.16   18.30
 -11  -3   4 1692.63   65.79
 -11  -3   4 1621.84   63.99
 -11   3   4 1712.03   72.49
 -11   3   4 1639.04   64.79
  -9  -3   4 1703.83   62.49
   9  -3  -4 1336.77   67.99
  -9  -3   4 1632.74   60.89
  -9   3   4 1574.54   68.49
  -9   3   4 1680.73   61.79
   9   3  -4 1604.14   60.59
   7  -3  -4 4052.79  152.28
  -7  -3   4 3683.73  144.39
  -7   3   4 3592.84  143.89
  -5  -3   4  778.92   31.30
   5  -3  -4  888.81   40.40
  -5   3   4  729.13   30.90
  -5   3   4  734.03   30.90
  -3  -3   4 1309.87   48.30
  -3   3   4 1199.78   47.90
  -3   3   4 1197.58   48.30
   1  -3  -4 1508.55   64.99
  -1  -3   4 1502.55   56.79
  -1   3   4 1406.26   57.29
  -1   3   4 1405.06   56.49
   1   3  -4 1511.75   63.89
   1  -3   4 2096.09   77.19
  -1   3  -4 2025.80   76.49
   1   3   4 1967.20   77.09
   1   3   4 1950.50   78.09
   3  -3   4 1765.82   66.89
   3   3   4 1730.33   66.99
  -3   3  -4 1715.53   66.59
   5  -3   4 2290.17   89.49
  -5  -3  -4 2331.87   90.39
   5  -3   4 2553.94  101.39
  -5   3  -4 2285.67   89.69
   5   3   4 2307.17   89.89
   5   3   4 2301.87   91.39
   7  -3   4  781.02   30.30
  -7  -3  -4  794.32   31.40
   7  -3   4  714.03   42.50
  -7   3  -4  732.43   44.00
   7   3   4  791.72   32.60
  -7   3  -4  787.52   30.80
   7   3   4  772.92   30.80
  -9  -3  -4  419.76   18.40
   9   3   4  408.56   19.50
   9   3   4  415.16   17.80
  -9   3  -4  406.46   17.90
 -11  -3  -4  127.09    8.10
  11   3   4  117.09    9.30
 -11   3  -4  122.09    7.80
  11   3   4  127.89    7.60
 -13  -3  -4  339.97   16.40
  13   3   4  337.97   17.50
 -13   3  -4  336.87   35.50
 -13   3  -4  330.77   16.10
  13   3   4  338.17   15.70
 -15  -3  -4 1635.14   66.69
 -15   3  -4 1668.13   66.49
  15   3   4 1693.73   67.69
  15   3   4 1667.33   65.89
 -17  -3  -4  250.97   14.60
  17   3   4  255.67   15.60
  17   3   4  258.77   13.90
 -17   3  -4  251.97   14.40
 -19  -3  -4  536.35   25.70
 -19   3  -4  528.25   25.50
  19   3   4  561.04   25.00
 -21  -3  -4    1.00    3.90
  21  -3   4   -0.50    3.70
 -21   3  -4   -0.20    3.70
 -21   3  -4   -8.20   14.20
  21   3   4    5.20    4.00
 -23  -3  -4   -3.20    3.90
  23  -3   4   -2.10    4.20
 -23   3  -4  -13.70   15.40
 -23   3  -4   -4.10    3.90
  23   3   4   -1.20    4.00
 -28  -4   4    0.80    4.30
  28   4  -4    3.20    4.10
 -28   4   4    2.30    4.20
 -28   4   4    1.10   14.00
 -26  -4   4   28.80    5.00
 -26   4   4   35.60    5.70
  26   4  -4   29.10    4.60
 -24  -4   4  218.68   13.10
  24   4  -4  221.98   12.50
 -24   4   4  207.48   13.90
 -22  -4   4  263.47   13.80
 -22   4   4  242.78   14.40
  22   4  -4  260.37   13.10
 -20  -4   4  504.25   21.60
 -20  -4   4  441.86   23.50
  20   4  -4  458.65   27.50
 -20   4   4  487.25   22.10
  20   4  -4  505.45   20.90
 -18  -4   4  343.27   19.60
 -18  -4   4  367.46   16.70
 -18   4   4  352.56   17.20
  18   4  -4  375.36   16.20
  18   4  -4  409.36   24.70
 -18   4   4  368.26   34.30
 -16  -4   4  101.69    9.80
 -16  -4   4  107.19    6.80
  16   4  -4  109.59    6.40
 -16   4   4  103.49    7.30
 -14  -4   4   19.80    4.10
 -14  -4   4   28.00    3.70
 -14   4   4   17.50    2.70
  14   4  -4   26.30    3.40
 -12  -4   4 1348.77   52.09
 -12  -4   4 1318.97   54.49
 -12   4   4 1337.27   52.99
 -12   4   4 1377.56   61.99
  12   4  -4 1334.57   51.69
 -10  -4   4  378.06   15.80
 -10  -4   4  424.76   18.40
  10   4  -4  371.36   15.40
 -10   4   4  371.86   25.30
 -10   4   4  383.26   16.80
  -8  -4   4  930.61   37.10
  -8  -4   4  979.00   39.30
  -8   4   4  968.10   38.30
  -8   4   4  972.80   37.90
  -6  -4   4  502.95   20.90
  -6   4   4  470.25   20.00
  -6   4   4  473.35   20.00
  -4  -4   4  716.83   28.50
  -4   4   4  689.73   27.90
  -4   4   4  672.63   28.30
  -2  -4   4  236.18   11.10
  -2   4   4  234.28   11.50
  -2   4   4  232.98   10.70
   0  -4   4  627.04   24.80
   0   4   4  594.44   24.50
   0   4   4  598.84   25.90
   2  -4   4 1501.45   56.29
  -2   4  -4 1409.76   55.59
   2   4   4 1430.66   56.19
   2   4   4 1454.95   58.19
   4  -4   4 1740.13   72.19
  -4  -4  -4 1689.83   68.79
   4  -4   4 1443.36   58.79
   4   4   4 1441.56   61.19
  -4   4  -4 1395.36   58.59
   4   4   4 1436.96   59.09
   6  -4   4  566.64   39.90
   6  -4   4  699.63   26.50
   6   4   4  731.13   29.70
  -6   4  -4  564.14   39.90
  -6   4  -4  691.43   26.70
   6   4   4  702.23   27.00
  -8  -4  -4  140.49    8.50
   8   4   4  143.59    7.90
  -8   4  -4  141.59    7.80
   8   4   4  150.78   10.40
 -10  -4  -4   66.79    6.00
  10   4   4   67.49    7.80
  10   4   4   64.19    5.50
 -10   4  -4   57.39    5.40
 -12  -4  -4  272.47   14.10
  12   4   4  302.67   16.40
  12   4   4  280.97   13.60
 -12   4  -4  268.57   13.70
 -14  -4  -4   23.40    3.70
  14   4   4   24.50    4.70
 -14   4  -4   41.70   14.70
 -14   4  -4   18.20    3.40
  14   4   4   20.10    3.30
 -16  -4  -4  998.50   42.90
  16   4   4 1054.79   42.20
 -16   4  -4 1014.10   42.80
  16   4   4 1033.20   44.80
 -18  -4  -4  213.08   13.40
 -18   4  -4  213.08   13.60
  18   4   4  234.98   13.20
  18   4   4  212.28   15.80
 -20  -4  -4  152.88   12.00
 -20   4  -4  130.99   12.00
  20   4   4  169.48   11.60
 -22  -4  -4   25.90    5.30
 -22   4  -4   23.90    5.30
  22   4   4   32.90    5.10
  24  -4   4   22.80    5.50
 -24  -4  -4   22.90    5.70
 -24   4  -4   25.50    5.90
  24   4   4   24.20    5.30
 -27  -5   4    5.30    4.30
 -27   5   4    3.70    4.60
  27   5  -4    6.80    3.90
 -27   5   4   -5.50   13.00
 -25  -5   4    6.10    3.90
 -25   5   4    9.40    4.40
 -25   5   4   -9.00   12.50
  25   5  -4   10.90    3.60
 -23  -5   4    2.80    3.10
 -23   5   4    0.30    3.30
  23   5  -4    4.40    3.00
 -21  -5   4   20.00    3.50
 -21  -5   4    7.50    4.70
  21   5  -4    8.50    6.20
  21   5  -4   16.90    3.10
 -21   5   4   20.10    3.80
 -19  -5   4   -2.10    3.70
 -19  -5   4    0.20    2.20
  19   5  -4   -3.90    4.90
 -19   5   4   -0.10    8.40
 -19   5   4    1.50    2.60
 -17   5   4    7.80    2.50
 -17   5   4   11.20    7.60
 -15  -5   4    0.00    1.70
 -15   5   4   -1.90    5.50
  15   5  -4   14.60    6.00
 -15   5   4   -0.30    1.90
 -13  -5   4   66.49    4.90
 -13  -5   4   66.99    8.40
 -13   5   4   55.29   15.50
  13   5  -4   73.09   12.20
  13   5  -4   62.89    4.40
 -13   5   4   59.59    5.60
 -11  -5   4   44.30    3.70
  11  -5  -4   66.39   17.20
 -11  -5   4   42.80    6.70
  11   5  -4   42.60    3.30
   9  -5  -4   12.30    7.20
  -9  -5   4    8.70    1.40
  -9  -5   4    7.90    3.10
   9   5  -4    7.30    1.20
  -7  -5   4  113.49    8.40
  -7   5   4  115.79    7.00
  -7   5   4  108.29    6.90
   5  -5  -4   -4.90    6.90
  -5  -5   4   -0.40    2.40
  -5   5   4    0.70    1.80
  -5   5   4    6.30    1.90
   3  -5  -4  105.39   22.30
  -3  -5   4  106.19    7.80
  -3   5   4  115.49    7.00
  -3   5   4  130.09    8.20
   1  -5  -4  431.56   31.20
  -1  -5   4  427.96   18.70
  -1   5   4  407.46   18.00
  -1   5   4  430.66   20.00
   1  -5   4  485.25   20.20
  -1  -5  -4  436.66   32.00
   1   5   4  468.25   19.70
   1   5   4  496.45   22.30
  -1   5  -4  467.85   18.80
   3  -5   4   73.49   19.90
   3  -5   4   91.09    6.20
  -3   5  -4   91.59    5.10
   3   5   4  110.39    8.60
   3   5   4   86.39    6.10
  -3   5  -4   99.19   18.30
   5  -5   4   -0.70    1.60
  -5  -5  -4    2.60    8.50
   5   5   4    1.30    2.50
  -5   5  -4   -1.40    1.20
  -5   5  -4   10.60    7.80
   5   5   4    0.00    1.70
   7  -5   4   33.50    3.90
   7  -5   4   19.40   10.40
   7   5   4   34.70    4.40
  -7   5  -4   25.30    3.90
   7   5   4   44.20    7.00
  -9   5  -4    2.10    1.80
   9   5   4    2.30    1.90
   9   5   4    5.00    3.10
  -9   5  -4    5.60    9.60
 -11  -5  -4   -1.60    2.20
  11   5   4    1.00    3.20
 -11   5  -4   -2.70   10.50
  11   5   4   -0.90    2.10
 -11   5  -4   -0.10    1.80
 -13  -5  -4    5.70    2.70
 -13   5  -4   -2.10   12.50
  13   5   4    5.60    4.00
  13   5   4    4.60    2.60
 -13   5  -4    6.20    2.60
 -15  -5  -4    5.20    2.90
 -15   5  -4    1.30    2.90
 -15   5  -4    6.40   14.10
  15   5   4    4.10    2.90
  15   5   4   -0.10    4.20
 -17  -5  -4   27.70    4.50
  17   5   4   27.90    4.10
 -17   5  -4   15.70   14.90
  17   5   4   18.00    5.70
 -17   5  -4   25.80    4.30
 -19  -5  -4   11.80    4.00
 -19   5  -4   -4.00   14.80
 -19   5  -4    8.30    4.10
  19   5   4    7.90    6.60
  19   5   4   18.40    4.10
 -21  -5  -4    5.00    4.10
 -21   5  -4   -0.40   15.50
 -21   5  -4    0.30    3.80
  21   5   4    5.60    3.90
 -23  -5  -4    4.40    4.60
 -23   5  -4    1.10   15.60
 -23   5  -4    3.90    4.70
  23   5   4    8.80    4.30
 -26   6   4    0.30   10.50
 -26   6   4    0.30    4.20
 -24   6   4   74.69    9.60
 -22  -6   4  107.79   12.90
 -22  -6   4  141.39   12.90
 -22   6   4  140.89   10.90
  22   6  -4  153.68    9.60
  22   6  -4  106.19   16.90
 -22   6   4   90.69   26.30
 -20  -6   4  253.97   17.50
 -20  -6   4  292.17   14.50
 -20   6   4  267.07   29.70
  20   6  -4  252.17   21.70
 -20   6   4  276.37   14.90
  20   6  -4  293.87   13.60
 -18  -6   4  331.77   19.60
 -18  -6   4  353.96   15.90
  18   6  -4  356.06   15.20
 -18   6   4  312.87   30.20
  18   6  -4  296.87   23.70
 -18   6   4  320.87   16.30
 -16  -6   4   69.19    5.90
 -16  -6   4   67.49   10.00
 -16   6   4   52.89    6.20
  16   6  -4   59.79    5.30
 -14  -6   4    5.60    3.90
 -14  -6   4    9.40    2.10
 -14   6   4   11.00    2.50
  14   6  -4   12.10    6.30
 -14   6   4   -0.10    7.50
  14   6  -4    7.90    1.80
 -12  -6   4  405.26   17.00
 -12  -6   4  411.86   20.80
 -12   6   4  414.66   18.20
  12   6  -4  362.26   25.10
  12   6  -4  402.66   16.60
 -10  -6   4 1263.77   51.79
  10   6  -4 1212.78   47.90
 -10   6   4 1258.67   49.50
  -8  -6   4 1930.31   74.79
   8  -6  -4 1660.23   83.89
  -8   6   4 1953.00   73.19
  -8   6   4 1928.51   72.89
  -6  -6   4 1445.06   54.99
   6  -6  -4 1150.68   64.49
  -6   6   4 1414.06   54.29
  -6   6   4 1392.86   53.19
  -4  -6   4  369.76   17.60
  -4   6   4  373.46   17.90
  -4   6   4  357.06   16.10
  -2  -6   4  287.97   14.70
   2  -6  -4  257.87   28.60
  -2   6   4  306.67   13.70
  -2   6   4  337.47   16.30
   0  -6   4  585.14   24.90
   0   6  -4  579.34   22.90
   0   6   4  562.24   23.90
   0   6  -4  579.84   30.20
   0   6   4  579.54   27.10
   2  -6   4 2607.04   92.89
  -2  -6  -4 2401.86  105.89
   2  -6   4 2184.98  105.39
  -2   6  -4 2018.20  100.99
   2   6   4 2552.94   96.29
   2   6   4 2455.75   92.09
  -2   6  -4 2503.65   91.39
   4  -6   4  837.92   33.90
   4   6   4  854.91   38.00
   4   6   4  809.62   33.60
  -4   6  -4  835.12   33.10
   6  -6   4  656.43   25.30
  -6  -6  -4  505.45   38.00
   6  -6   4  559.84   44.60
   6   6   4  652.93   30.10
  -6   6  -4  665.73   25.10
   6   6   4  619.44   25.20
  -6   6  -4  559.04   40.40
   8   6   4  321.77   15.10
   8   6   4  340.37   19.70
  -8   6  -4  333.07   14.90
  -8   6  -4  298.47   33.20
  10   6   4   50.59    6.10
 -10   6  -4   73.29    6.10
  10   6   4   61.09   10.20
 -12   6  -4  164.28    9.90
  12   6   4  145.39   14.20
  12   6   4  147.29    9.70
 -14  -6  -4  197.08   12.10
 -14   6  -4  222.58   12.10
  14   6   4  176.98   11.30
  14   6   4  176.18   16.10
 -16  -6  -4  226.08   14.10
 -16   6  -4  254.97   14.20
  16   6   4  243.98   13.50
  16   6   4  237.78   18.30
 -18  -6  -4  157.48   12.40
 -18   6  -4  181.88   12.60
  18   6   4  155.18   16.10
  18   6   4  171.78   11.60
 -20  -6  -4   24.80    5.00
 -20   6  -4   36.00    5.60
 -22  -6  -4    4.90    4.50
  22   6   4   15.50    4.30
 -22   6  -4   -6.50   14.80
 -22   6  -4    6.40    4.90
 -25   7   4   18.40   10.30
 -25   7   4   23.40    5.00
 -23  -7   4   87.09   11.80
 -23   7   4   81.49    9.50
  23   7  -4   85.79   14.80
 -23   7   4   80.19   23.50
 -21  -7   4  244.98   17.60
 -21   7   4  274.97   15.30
 -21   7   4  283.77   30.80
 -19  -7   4  225.18   17.20
 -19   7   4  256.97   14.10
 -19   7   4  268.27   29.20
  19   7  -4  225.58   21.70
 -17  -7   4  225.38   17.00
  17   7  -4  230.68   22.10
 -17   7   4  239.38   13.40
 -17   7   4  271.37   28.70
 -15  -7   4   -4.40    4.20
 -15   7   4    3.30    2.60
  15   7  -4    1.60    3.10
  15   7  -4   -4.60    5.70
 -13  -7   4  142.99   12.60
  13   7  -4  164.18    8.00
  13   7  -4  107.59   16.80
 -13   7   4  155.28    9.50
 -11  -7   4  555.84   26.80
  11   7  -4  570.34   32.60
 -11   7   4  567.64   24.20
  11   7  -4  540.35   22.40
   9  -7  -4 1634.64   82.79
  -9  -7   4 1746.03   69.89
   9   7  -4 1692.43   65.79
  -9   7   4 1815.22   68.19
  -9   7   4 1750.42   67.59
   9   7  -4 1661.23   74.69
   7  -7  -4 1228.38   65.29
  -7  -7   4 1223.58   50.59
  -7   7   4 1202.88   48.40
  -7   7   4 1211.08   49.70
  -5  -7   4  856.41   35.80
   5  -7  -4  697.73   49.40
  -5   7   4  876.71   33.90
  -5   7   4  881.21   36.20
  -3  -7   4   84.29    7.90
  -3   7   4   88.59    8.50
  -3   7   4   81.89    6.40
  -1  -7   4   91.09    8.00
   1  -7  -4  123.79   26.60
  -1   7   4   96.09    6.80
  -1   7   4   87.29    9.40
   1  -7   4 1424.06   56.29
   1   7   4 1348.37   59.49
  -1   7  -4 1460.35   54.29
   1   7   4 1364.86   54.99
  -3  -7  -4  882.61   52.59
   3  -7   4  781.62   33.00
   3  -7   4  894.41   53.59
  -3   7  -4  765.82   31.40
   3   7   4  765.92   36.90
   3   7   4  743.63   32.00
  -3   7  -4  694.13   41.80
   5  -7   4  786.52   52.99
  -5  -7  -4  662.83   47.10
   5  -7   4  648.44   28.30
  -5   7  -4  673.13   42.10
  -5   7  -4  649.74   27.30
   5   7   4  631.24   27.60
   5   7   4  633.64   32.90
   7  -7   4  491.75   21.80
   7   7   4  483.35   27.30
   7   7   4  492.75   21.40
  -7   7  -4  512.25   21.40
   9   7   4  116.99    8.40
  -9   7  -4  129.69    8.20
   9   7   4  100.19   13.80
  11   7   4   23.70    3.60
 -11   7  -4   21.90    3.50
  11   7   4   10.90    6.00
  13   7   4   21.30    3.90
  13   7   4   21.70    6.90
 -13   7  -4   26.90    4.10
 -13   7  -4   28.50   13.90
  15   7   4  263.27   20.90
  15   7   4  278.87   14.80
 -15   7  -4  298.47   15.70
  17   7   4  292.37   22.50
  17   7   4  322.07   16.70
 -17   7  -4  339.57   17.80
 -19  -7  -4  116.29   11.50
  19   7   4  116.19   15.60
  19   7   4  144.29   10.80
 -19   7  -4  137.59   11.70
 -21  -7  -4   17.60    4.90
 -21   7  -4   19.40    5.20
  21   7   4   23.90    4.60
 -21   7  -4    1.00   14.90
 -24   8   4   -0.90    3.70
 -24   8   4    7.10    9.60
  24   8  -4   -3.20    5.80
 -22  -8   4   -5.50    4.60
 -22   8   4    0.00    3.30
  22   8  -4   -4.00    5.50
 -22   8   4    2.10    9.40
 -20  -8   4    2.20    4.80
 -20   8   4    6.30    9.60
  20   8  -4    2.10    6.10
 -20   8   4    3.00    3.20
 -18  -8   4    1.60    5.10
 -18   8   4    0.40    3.20
 -18   8   4    8.50   10.00
  18   8  -4    3.30    6.70
 -16  -8   4   -8.00    4.60
  16   8  -4   -3.80    7.60
 -16   8   4   -5.20    2.80
 -14  -8   4   -4.70    4.60
 -14   8   4   -5.20    2.60
 -12  -8   4   39.20    6.40
  12   8  -4   39.20    9.80
 -10  -8   4   12.70    4.80
 -10   8   4   16.70    3.00
  -8  -8   4  181.48   13.20
  -8   8   4  185.28   10.50
  -8   8   4  190.68   12.20
  -6  -8   4   53.69    8.20
  -6   8   4   40.90    5.70
  -6   8   4   32.20    5.20
   6   8  -4   51.19    8.50
  -4  -8   4   29.60    4.80
   4  -8  -4   45.50   14.70
  -4   8   4   44.20    5.80
  -4   8   4   36.70    5.60
  -2  -8   4    0.40    3.10
   2  -8  -4    0.30   12.40
  -2   8   4   -0.80    2.20
  -2   8   4   -3.50    3.30
   0  -8   4  165.38   29.60
   0  -8   4  180.78   11.70
   0  -8  -4  167.48   33.20
   0   8   4  173.48    9.90
   0   8  -4  180.98    8.40
   0   8   4  153.38   14.00
   2  -8   4   30.40   13.80
  -2  -8  -4   23.20    5.10
   2  -8   4   46.10    7.10
  -2  -8  -4   30.30   15.20
   2   8   4   25.70    6.00
  -2   8  -4   31.80    4.10
   2   8   4   37.70    5.70
  -4  -8  -4   10.50    4.80
  -4  -8  -4   -3.50   14.10
  -4  -8  -4   -3.00   14.10
   4  -8   4    9.00    3.50
   4  -8   4   -0.60   13.60
   4   8   4   11.70    5.20
  -4   8  -4    9.70    2.20
   4   8   4   12.80    2.90
  -6  -8  -4  116.99   34.90
   6  -8   4  129.19   10.10
  -6  -8  -4  151.88   13.90
   6  -8   4  136.59   41.60
   6   8   4  142.89   15.40
  -6   8  -4  148.19    8.60
   6   8   4  153.58    9.10
  -8  -8  -4    2.20   15.50
  -8   8  -4    7.60    2.60
   8   8   4    6.70    2.80
   8   8   4   -5.80    5.30
  10   8   4    7.10    6.20
 -10   8  -4    7.30    3.10
  10   8   4   13.50    3.20
 -12   8  -4   66.29    7.80
 -12   8  -4   40.70   21.30
  12   8   4   71.99    7.70
  12   8   4   42.30    8.60
 -14   8  -4    2.60   12.60
 -14   8  -4   -1.20    3.00
  14   8   4   -5.80    5.50
  14   8   4   -0.80    3.10
 -16   8  -4    0.70   13.10
  16   8   4   -7.60    5.80
  16   8   4    2.80    3.30
 -16   8  -4    2.20    3.30
 -18   8  -4   -9.40   13.90
  18   8   4   -2.90    6.20
  18   8   4   10.70    3.70
 -18   8  -4    5.20    3.90
 -20   8  -4    1.60    4.10
  20   8   4    6.60    3.80
  20   8   4   -7.40    6.40
 -20   8  -4  -10.60   18.10
 -23  -9   4  145.99   15.20
 -23   9   4  174.98   12.80
  23   9  -4  163.98   19.00
 -23   9   4  176.98   29.70
 -21  -9   4  229.68   18.10
 -21   9   4  282.07   15.60
  21   9  -4  273.27   22.80
 -19  -9   4   84.59   12.00
 -19   9   4   81.39    8.80
 -17  -9   4  101.89   12.70
  17   9  -4   98.89   16.40
 -17   9   4   89.69    8.90
 -15  -9   4   -2.60    4.80
 -15   9   4   -2.00    2.70
  15   9  -4   -2.90    6.60
 -13  -9   4   19.60    5.90
 -13   9   4   24.30    3.90
  13   9  -4    9.30    8.20
 -11  -9   4  250.37   17.80
 -11   9   4  287.27   14.40
  -9  -9   4   18.10    5.70
   9  -9  -4   10.10   16.90
  -9   9   4   26.00    6.00
   9   9  -4   26.30    8.30
  -9   9   4   24.60    3.70
  -7  -9   4  740.83   34.30
  -7   9   4  778.42   34.60
   7   9  -4  665.73   38.80
  -7   9   4  778.02   31.50
   5  -9  -4   43.00   17.20
  -5  -9   4   68.99    9.50
  -5   9   4   54.29   10.10
  -5   9   4   60.49    6.60
   5   9  -4   41.50    8.80
   3  -9  -4    7.40   15.50
  -3   9   4   11.00    5.10
   3   9  -4   -0.20    6.00
   1  -9  -4   23.50   16.80
  -1  -9   4   21.50    4.70
  -1  -9   4    2.70   14.00
   1   9  -4   12.60    7.10
  -1   9   4   19.60    3.30
   1  -9   4  282.47   15.80
   1   9   4  277.57   13.70
   1   9   4  223.78   18.90
   3  -9   4  766.12   32.50
  -3  -9  -4  720.93   34.30
   3   9   4  761.22   30.80
   3   9   4  676.13   37.00
   5  -9   4  171.18   44.10
  -5  -9  -4  115.89   37.40
  -5  -9  -4  115.59   37.60
  -5   9  -4  192.78   15.70
   7   9   4  312.77   23.00
   7   9   4  337.57   16.20
  -7   9  -4  341.27   16.40
  -9  -9  -4   -7.40   14.50
   9   9   4   -2.70    5.20
   9   9   4    2.40    2.70
  -9   9  -4   -4.00    2.50
 -11  -9  -4  -11.40   14.40
  11   9   4   -4.10    5.60
  11   9   4    6.00    3.00
 -11   9  -4   -1.60    2.90
  13   9   4  355.66   26.40
 -13   9  -4  399.56   19.50
  13   9   4  370.16   18.20
  15   9   4   82.29    8.50
 -15   9  -4   75.59    9.30
  15   9   4   48.60   10.00
  17   9   4  208.18   13.30
  17   9   4  185.58   21.50
 -17   9  -4  232.28   14.70
 -19   9  -4   35.20    5.90
  19   9   4   23.00    9.10
 -20 -10   4  188.38   16.60
  20  10  -4  199.68   20.90
 -20  10   4  201.18   13.40
 -18 -10   4  164.28   15.20
 -18  10   4  160.18   11.70
  18  10  -4  175.48   19.70
 -16 -10   4   90.29   12.50
  16  10  -4   58.49   10.50
 -16  10   4   88.99    8.70
 -14 -10   4   -0.10    4.90
  14  10  -4   11.10    6.70
 -14  10   4    1.10    2.70
 -12 -10   4   98.49   12.70
 -12  10   4  109.29    8.80
  12  10  -4  113.69   17.10
 -10 -10   4  495.85   26.70
 -10  10   4  509.75   23.20
  10  10  -4  537.65   32.70
  -8 -10   4  267.97   18.40
  -8  10   4  280.97   14.80
  -8  10   4  307.87   20.50
  -6 -10   4 1023.90   45.30
  -6  10   4 1062.49   46.60
   6  10  -4  990.20   50.59
  -6  10   4 1033.20   42.20
  -4 -10   4  209.68   15.40
  -4  10   4  231.28   12.30
   4  10  -4  174.58   20.40
  -4  10   4  217.98   17.30
  -2 -10   4    1.50    4.40
   2 -10  -4   12.00   17.20
  -2  10   4    2.30    2.90
   2  10  -4    8.70    7.30
  -2  10   4   -5.30    5.10
   0 -10  -4  156.08   39.70
   0 -10   4  200.98   14.10
   0  10  -4  172.88   18.60
   0  10   4  168.28   17.20
   0  10   4  201.98   11.40
   2 -10   4  639.54   27.50
   2 -10   4  477.45   55.79
  -2  10  -4  493.55   30.50
   2  10   4  617.44   25.10
   2  10   4  570.74   31.80
   4 -10   4  670.93   29.10
   4 -10   4  579.04   58.99
  -4 -10  -4  645.94   31.40
   4  10   4  634.24   34.50
  -4  10  -4  564.04   31.80
   4  10   4  637.64   27.00
   6  10   4  524.35   31.60
   6  10   4  563.64   24.20
   8  10   4   87.69   14.80
   8  10   4   88.39    8.30
 -10 -10  -4    6.10   18.30
  10  10   4   26.10    3.90
  10  10   4   20.20    7.50
 -12 -10  -4   29.70   19.70
  12  10   4   55.69   10.10
  14  10   4  359.56   18.20
  14  10   4  344.47   27.30
  16  10   4  219.68   13.90
  16  10   4  221.18   23.50
 -19 -11   4   87.69   13.40
 -19  11   4   81.39    9.80
  19  11  -4   91.29   17.30
 -17 -11   4    4.00    6.20
  17  11  -4    8.10    7.70
 -17  11   4    6.70    4.00
 -15 -11   4   -5.30    5.60
  15  11  -4    0.60    7.30
 -15  11   4   -0.90    3.30
 -13 -11   4    1.00    5.80
 -13  11   4    5.00    3.40
  13  11  -4   -4.50    7.60
 -11 -11   4  141.89   14.30
  11  11  -4  150.28   19.60
 -11  11   4  139.79   10.30
  -9 -11   4   35.70    6.70
   9  11  -4   40.60    9.50
  -9  11   4   46.00    7.10
  -7 -11   4    1.80    4.90
   7 -11  -4   20.40   19.70
  -7 -11   4    9.90   15.20
   7  11  -4    3.50    7.20
  -7  11   4   -4.30    6.10
  -7  11   4    2.90    2.90
  -5 -11   4  126.09   37.60
  -5 -11   4  153.48   14.30
  -5  11   4  164.28   10.40
   5  11  -4  158.08   19.10
  -5  11   4  146.69   14.90
   3 -11  -4   10.10   17.60
  -3 -11   4   19.60   16.50
  -3 -11   4   19.50    6.00
  -3  11   4   26.30    6.80
  -3  11   4   27.40    4.10
   3  11  -4   26.20    8.20
   1 -11  -4    3.00   16.50
  -1 -11   4    7.80   17.00
  -1  11   4   -4.50    2.80
  -1  11   4   -7.30    4.70
   1  11  -4   -0.30    6.30
  -1 -11  -4   61.49   19.90
   1 -11   4   61.69   10.60
   1 -11   4   56.59   19.90
   1  11   4   39.20    8.10
  -1  11  -4   80.09   13.70
   1  11   4   64.69    7.70
  -3 -11  -4  161.58   40.10
   3 -11   4  163.28   49.60
   3 -11   4  159.58   13.10
  -3  11  -4  151.58   15.40
   3  11   4  156.88   10.50
   3  11   4  124.89   16.70
  -5 -11  -4  200.48   41.30
   5  11   4  222.68   12.50
   5  11   4  196.38   19.80
  -7 -11  -4   34.70   18.10
   7  11   4   43.20    9.80
  -9 -11  -4   16.30   16.40
   9  11   4   -3.70    3.20
   9  11   4   -8.90    6.20
 -11 -11  -4   22.10   21.40
  11  11   4   -0.90    3.50
  11  11   4   -5.10    7.40
 -13 -11  -4   34.50   23.00
  13  11   4   33.80    9.90
  15  11   4   29.60   10.50
  15  11   4   24.70    4.90
 -16 -12   4   -8.20    6.20
 -16  12   4   -5.50    3.80
  16  12  -4   -2.30    7.70
 -14 -12   4    2.90    6.20
  14  12  -4   -1.10    8.30
 -14  12   4    1.20    3.90
 -12 -12   4    7.70   16.10
 -12 -12   4   14.50    6.80
 -12  12   4   16.70    4.20
  12  12  -4   10.70    9.30
 -10 -12   4    8.40    6.40
 -10 -12   4   10.90   16.90
  10  12  -4    8.20    7.80
 -10  12   4   10.40    3.80
  -8 -12   4  148.09   14.70
  -8  12   4  151.88   11.00
   8  12  -4  163.68   19.10
  -6 -12   4   35.20    6.60
   6  12  -4   39.70    8.80
  -6  12   4   55.69    7.70
   4 -12  -4   11.20   17.50
  -4 -12   4   14.50    5.60
  -4 -12   4   13.60   17.70
  -4  12   4   19.80    3.90
   4  12  -4   15.20    7.10
  -4  12   4   14.30    6.10
  -2 -12   4   22.10   18.70
   2 -12  -4   18.30   18.10
   2  12  -4    6.90    6.40
   0 -12   4   13.10   19.00
   0 -12  -4   14.70   17.30
   0 -12   4    3.30    5.10
   0  12   4    6.60    5.80
   0  12  -4   10.20    6.20
   0  12   4    3.10    3.30
  -2 -12  -4   20.70   17.00
   2 -12   4   35.90    6.20
   2 -12   4    5.20   19.20
  -2  12  -4   28.60    7.10
   2  12   4   32.10    7.90
   2  12   4   34.50    4.60
   4  12   4  180.98   19.40
   4  12   4  195.78   12.10
  -6 -12  -4   24.70   17.70
   6  12   4   23.70    4.50
   6  12   4   19.20    8.10
  -8 -12  -4   44.20   21.30
   8  12   4   18.00    9.00
   8  12   4   18.50    4.40
 -10 -12  -4   26.80   18.60
  10  12   4   -1.10    3.80
  10  12   4  -10.30    7.10
 -12 -12  -4   38.60   26.30
  12  12   4   52.19   11.40
 -13 -13   4    3.90   19.30
 -13 -13   4   -3.30    5.70
 -13  13   4   -4.40    3.40
  13  13  -4   -2.90    7.50
 -11 -13   4  106.59   14.40
 -11  13   4  114.69   10.60
  11  13  -4  112.09   18.80
  -9 -13   4  310.47   20.80
   9  13  -4  284.27   24.90
  -9  13   4  310.97   16.90
  -7 -13   4  454.95   25.30
  -7  13   4  449.66   21.70
   7  13  -4  408.06   29.20
  -5 -13   4  154.48   14.60
  -5  13   4  136.59   11.30
   5  13  -4  136.89   17.70
   3 -13  -4   38.10   19.20
  -3 -13   4   16.70   21.70
  -3  13   4   49.00    9.00
  -3  13   4   63.89    8.60
   3  13  -4   42.10    8.50
  -1 -13   4  153.48   13.90
   1  13  -4  138.09   16.20
  -1  13   4  118.89   16.60
  -1  13   4  127.29   11.00
  -1 -13  -4  119.59   40.60
   1 -13   4  149.39   14.00
  -1  13  -4  156.68   16.70
   1  13   4  126.29   11.20
   1  13   4  138.69   17.50
   3  13   4  391.16   27.10
  -5 -13  -4  156.38   47.60
   5  13   4  242.48   21.70
  -7 -13  -4   56.09   24.10
  -9 -13  -4   33.90   24.30
   9  13   4   -1.00    7.10
   8  14  -4  111.09   18.20
  -6 -14   4   42.10   25.20
  -6 -14   4   32.20    7.40
   6  14  -4   29.30    9.10
  -4 -14   4  117.19   15.00
   4  14  -4  123.89   18.20
   2 -14  -4   39.50   20.90
  -2 -14   4    2.80    5.90
  -2 -14   4   36.70   25.40
   2  14  -4    2.20    6.80
   0 -14  -4   33.10   20.00
   0 -14   4    2.40    8.80
   0 -14   4   29.80   23.80
   0  14  -4   10.90    9.40
  -2 -14  -4  131.29   43.40
   2  14   4  144.39   18.90
 -28   0   5   -2.40    3.70
 -26   0   5   -4.70    3.40
 -24   0   5   -3.90    3.00
 -22   0   5    0.10    2.80
 -20   0   5   -3.50    2.30
 -18   0   5   -1.90    1.90
 -16   0   5    8.20    2.20
 -16   0   5    1.10    1.80
 -14   0   5    0.30    1.50
 -14   0   5   -3.70    1.30
 -12   0   5   -1.00    1.40
 -12   0   5   -0.60    1.20
 -10   0   5    4.80    1.50
 -10   0   5    0.20    1.10
  -8   0   5    2.30    0.90
  -8   0   5   -1.70    3.40
  -6   0   5    2.60    1.00
  -6   0   5   -1.00    1.50
  -6   0   5   -2.50    4.80
  -4   0   5    0.50    1.60
   4   0  -5    0.70    6.10
  -2   0   5   -1.40    1.70
  -2   0   5   -2.20    1.10
   2   0  -5   -5.20    7.00
   0   0   5   -4.30    0.90
   0   0  -5   -6.80    6.90
   0   0   5   -0.60    1.70
   2   0   5    0.60    1.50
  -2   0  -5   -0.40    0.90
   2   0   5   -0.40    0.90
  -2   0  -5   -6.30    7.70
   4   0   5   -1.20    1.10
   4   0   5   -0.40    1.60
  -4   0  -5   -1.70    1.00
   6   0   5   -0.10    1.60
  -6   0  -5    1.60    1.30
   6   0   5    1.20    1.30
  -8   0  -5   -4.30   10.20
   8   0   5    2.10    1.90
  -8   0  -5    0.60    1.40
   8   0   5    0.50    1.50
  10   0   5    0.60    1.80
  10   0   5    1.00    2.10
 -10   0  -5    1.00    1.70
 -10   0  -5  -10.80   11.20
  12   0   5    6.80    2.40
 -12   0  -5    4.50    2.40
  12   0   5    0.90    2.60
 -14   0  -5   -1.60   10.20
 -14   0  -5    0.80    2.50
  14   0   5    4.10    2.70
  14   0   5   -4.50    4.40
 -16   0  -5   -5.00    2.70
 -16   0  -5    3.00   10.40
 -18   0  -5   -1.80   10.90
 -18   0  -5   -3.60    3.10
  18   0   5   -5.30    3.20
 -20   0  -5   -1.40    3.70
 -20   0  -5    1.30   12.30
  20   0   5   -5.30    3.50
 -22   0  -5   -8.40   13.50
  22   0   5   -1.80    3.80
 -22   0  -5    1.70    4.20
 -24   0  -5   -9.70   14.70
  24   0   5   -1.40    4.50
 -24   0  -5   -2.10    4.30
 -29  -1   5   34.30    5.80
 -29   1   5   41.10    5.90
 -27  -1   5   28.70    5.20
 -27   1   5   32.00    5.20
 -25  -1   5  148.39   10.90
 -25   1   5  140.39   11.30
 -23  -1   5  270.67   14.30
 -23   1   5  256.77   14.40
 -21  -1   5    1.10    2.60
 -21   1   5   -3.10    2.60
 -19  -1   5   44.60    7.10
 -19  -1   5   42.00    5.50
 -19   1   5   44.60    5.70
 -17  -1   5  362.06   16.00
 -17  -1   5  349.37   16.80
 -17   1   5  356.16   16.20
 -15  -1   5 3252.67  121.39
 -15  -1   5 3061.89  121.79
 -15   1   5 3197.48  121.59
 -13  -1   5 1554.84   61.49
 -13  -1   5 1585.54   60.99
 -13   1   5 1593.44   61.29
 -11  -1   5 2863.21  112.49
 -11  -1   5 2947.41  112.99
 -11   1   5 3021.60  117.99
 -11   1   5 2920.71  112.79
 -11   1   5 3013.80  112.59
  -9  -1   5  409.46   16.90
  -9  -1   5  430.76   17.70
  -9   1   5  432.06   17.40
  -9   1   5  415.96   17.40
  -7  -1   5  217.58   13.90
  -7  -1   5  196.98    8.40
  -7  -1   5  197.18    9.40
  -7   1   5  195.68    9.20
  -7   1   5  194.08    8.90
  -5  -1   5 1482.75   55.99
  -5  -1   5 1371.46   60.89
  -5  -1   5 1561.04   56.89
  -5   1   5 1447.06   56.39
  -5   1   5 1483.55   56.79
  -3  -1   5 1896.21   69.39
  -3  -1   5 1675.53   68.29
  -3   1   5 1712.33   68.79
   3   1  -5 1914.91   75.19
  -3   1   5 1805.02   69.29
  -1  -1   5 1034.50   37.90
  -1  -1   5  924.31   36.90
  -1   1   5  930.71   37.30
   1  -1   5  659.53   26.20
   1  -1   5  687.23   27.00
   1   1   5  644.94   26.50
  -1   1  -5  705.03   26.50
   1   1   5  668.93   27.20
  -3  -1  -5   81.19    4.90
   3  -1   5   71.29    4.30
   3  -1   5   75.89    5.30
   3   1   5   77.89    5.40
  -3   1  -5   80.39    4.60
   3   1   5   77.99    4.60
  -5  -1  -5  137.79    7.20
   5  -1   5  126.59    6.50
   5  -1   5  131.09    7.20
   5   1   5  125.49    6.70
  -5   1  -5  135.79    6.90
   5   1   5  129.09    7.50
   7  -1   5  399.46   17.20
   7  -1   5  408.16   17.40
  -7  -1  -5  421.96   17.90
   7   1   5  412.36   18.10
   7   1   5  405.56   17.30
  -7   1  -5  404.76   17.60
   9  -1   5  539.65   23.30
  -9  -1  -5  555.54   23.90
   9  -1   5  536.25   23.20
  -9  -1  -5  615.44   39.50
   9   1   5  547.25   23.30
  -9   1  -5  627.34   37.90
  -9   1  -5  540.35   23.60
   9   1   5  539.25   24.00
  11  -1   5 2103.39   80.59
 -11  -1  -5 2051.19   81.39
  11  -1   5 2095.19   80.69
  11   1   5 2125.39   81.39
  11   1   5 2073.79   80.79
 -11   1  -5 2021.50   81.19
  13  -1   5 1299.37   51.69
  13   1   5 1302.97   51.79
 -13   1  -5 1239.08   52.19
  13   1   5 1347.97   52.49
 -15  -1  -5  224.58   13.40
  15  -1   5  244.68   13.10
 -15   1  -5  229.28   13.40
  15   1   5  264.57   17.60
  15   1   5  244.38   13.10
  17  -1   5   98.49    9.50
 -17  -1  -5  114.69    9.70
  17   1   5  119.39    9.70
 -17   1  -5   96.89    9.60
 -19  -1  -5    2.20   11.20
 -19  -1  -5    9.70    3.90
  19  -1   5    7.70    4.00
 -19   1  -5    7.60    3.80
 -19   1  -5    3.30   13.30
  19   1   5    8.60    3.80
 -21  -1  -5   63.29    9.40
  21  -1   5   42.30    5.90
  21   1   5   71.89    9.60
 -21   1  -5   46.80    6.50
 -23  -1  -5   99.29   11.70
  23  -1   5  101.89   11.80
  23   1   5  118.19   11.80
 -23   1  -5  103.59   11.80
 -28  -2   5    9.70    4.20
  28   2  -5   10.40    3.90
 -28   2   5   11.70    4.30
 -26  -2   5  203.68   13.30
 -26   2   5  210.18   13.60
  26   2  -5  211.78   12.60
 -24  -2   5   69.29    8.10
 -24   2   5   60.89    8.40
 -22  -2   5   43.00    6.80
 -22   2   5   49.20    7.10
 -20  -2   5  153.98   11.50
 -20  -2   5  156.78    9.60
 -20   2   5  156.68    9.90
 -18  -2   5  468.25   19.80
 -18  -2   5  438.56   21.30
 -18   2   5  460.35   20.20
 -16  -2   5 2342.57   90.49
 -16  -2   5 2426.76   89.19
 -16   2   5 2082.89   98.89
 -16   2   5 2391.16   89.59
 -14  -2   5 2790.92  103.89
 -14  -2   5 2688.53  104.99
 -14   2   5 2648.94  112.89
 -14   2   5 2717.93  104.29
 -12  -2   5 4512.35  176.88
 -12  -2   5 4618.24  177.98
 -12   2   5 4938.11  184.68
 -12   2   5 4581.84  177.48
 -10  -2   5  782.32   31.30
 -10  -2   5  751.82   30.10
 -10   2   5  792.12   30.50
 -10   2   5  768.12   30.90
  -8  -2   5 2306.17   84.89
  -8  -2   5 2091.79   83.59
  -8   2   5 2228.18   84.39
  -8   2   5 2183.58   84.49
  -6  -2   5  335.37   14.60
  -6   2   5  326.57   14.10
  -6   2   5  343.87   14.40
  -4   2   5   29.60    3.70
  -4   2   5   21.70    3.10
  -2  -2   5 1484.15   55.89
   2  -2  -5 1530.85   66.39
  -2   2   5 1342.07   55.39
  -2   2   5 1404.96   55.99
   0  -2  -5 3148.78  124.59
   0  -2   5 3091.49  113.99
   0  -2   5 3031.40  113.09
   0   2   5 2965.50  114.39
   0   2   5 2882.61  113.69
   0   2  -5 2638.94  121.19
   0   2  -5 3130.29  113.29
   2  -2   5  487.15   19.30
   2  -2   5  496.45   20.10
   2   2   5  491.05   19.90
   2   2   5  484.55   20.80
  -2   2  -5  483.75   19.60
   4  -2   5  104.19    5.70
   4  -2   5  114.39    6.60
  -4  -2  -5  118.79    6.70
   4   2   5  118.29    7.30
  -4   2  -5  118.29    6.00
   4   2   5  108.89    6.10
  -6  -2  -5 1011.90   40.20
   6  -2   5 1041.40   39.60
   6  -2   5  987.10   39.30
   6   2   5  975.60   39.60
  -6   2  -5  997.90   39.70
   6   2   5 1009.10   40.80
  -8  -2  -5 2049.49   81.19
  -8  -2  -5 2386.76   94.59
   8  -2   5 1952.20  100.49
   8  -2   5 2043.10   80.29
   8  -2   5 2153.68   80.39
  -8   2  -5 2029.00   80.69
   8   2   5 2080.69   80.59
  -8   2  -5 1965.70   93.89
   8   2   5 2105.29   81.79
  10  -2   5 2219.18   81.19
  10  -2   5 2079.69   81.29
 -10  -2  -5 2026.90   82.09
 -10   2  -5 2056.19   81.79
  10   2   5 2131.89   82.69
  10   2   5 2093.09   81.49
 -12  -2  -5 2509.95   98.49
  12  -2   5 2510.85   97.49
  12   2   5 2578.84   98.89
  12   2   5 2548.95   97.69
 -12   2  -5 2459.85   98.09
  14  -2   5  915.21   37.70
 -14  -2  -5  910.51   38.60
  14   2   5  945.61   39.00
 -14   2  -5  869.61   38.10
  14   2   5  947.11   37.90
 -16  -2  -5  425.66   21.10
  16  -2   5  439.26   20.60
 -16   2  -5  427.96   21.00
  16   2   5  464.85   27.30
  16   2   5  450.25   20.70
 -18  -2  -5    6.20    3.30
  18  -2   5    5.10    3.40
 -18   2  -5    4.70    3.40
 -18   2  -5   -9.20   12.90
  18   2   5    6.60    3.50
  20  -2   5   -3.60    3.60
 -20  -2  -5   -0.10    3.80
  20   2   5    3.10    3.80
 -20   2  -5   -6.10   14.30
 -20   2  -5   -1.70    3.60
  22  -2   5   42.70    6.40
 -22  -2  -5   69.99    9.90
 -22   2  -5   46.70    6.50
 -24  -2  -5  109.59   12.30
  24  -2   5  116.59   12.30
  24   2   5  130.29   12.30
 -24   2  -5  105.69   12.40
 -29  -3   5   -2.70    4.00
  29   3  -5   -3.10    3.80
 -29   3   5    3.30    4.20
 -29   3   5   -1.70   12.70
 -27  -3   5   26.70    4.80
 -27   3   5   22.40    5.10
  27   3  -5   29.50    4.50
 -27   3   5   15.90   13.00
 -25  -3   5   16.50    4.10
 -25   3   5   19.10    4.50
 -25   3   5    8.40   11.40
  25   3  -5   20.30    3.90
 -23  -3   5  115.89    9.10
  23   3  -5  122.09    8.60
 -23   3   5  108.29    9.60
 -21  -3   5   34.10    5.80
  21   3  -5   30.00    7.60
 -21   3   5   20.40   11.00
 -19  -3   5  165.48   12.70
 -19  -3   5  204.98   10.60
  19   3  -5  192.18   18.50
 -19   3   5  170.28   26.80
 -19   3   5  198.18   11.10
 -17  -3   5  324.87   17.20
 -17  -3   5  341.27   14.80
 -17   3   5  327.97   15.40
 -17   3   5  304.77   28.50
 -15  -3   5  653.43   28.90
 -15  -3   5  671.13   26.90
 -15   3   5  660.93   27.50
 -13  -3   5 1157.08   46.70
 -13  -3   5 1141.09   44.90
 -13   3   5 1140.79   45.70
 -13   3   5 1172.08   54.19
 -11  -3   5 1734.93   68.59
 -11  -3   5 1821.62   70.29
 -11   3   5 1820.72   69.59
  -9  -3   5  514.05   21.40
  -9  -3   5  482.25   19.60
  -9   3   5  497.85   20.90
  -9   3   5  499.15   20.40
  -7  -3   5 1213.08   46.80
  -7   3   5 1140.89   46.30
  -7   3   5 1195.98   46.30
  -3  -3   5  195.28    9.20
  -3   3   5  182.78    9.40
  -3   3   5  186.28    8.80
  -1  -3   5  419.66   17.00
  -1   3   5  394.26   16.70
  -1   3   5  391.06   17.50
   1  -3   5  493.05   20.30
   1   3   5  472.65   21.20
  -1   3  -5  495.55   19.50
   1   3   5  509.95   20.30
   3  -3   5  510.45   21.40
  -3  -3  -5  576.14   35.20
   3   3   5  513.65   22.80
   3   3   5  524.45   21.60
  -3   3  -5  508.85   21.10
  -5  -3  -5  599.44   24.70
   5  -3   5  587.44   23.90
  -5   3  -5  603.64   24.00
   5   3   5  577.84   24.20
   5   3   5  588.34   25.70
  -7  -3  -5  323.97   15.30
   7  -3   5  329.57   14.40
   7   3   5  318.57   14.80
   7   3   5  336.77   16.50
  -7   3  -5  348.57   14.80
   9  -3   5  489.15   20.70
  -9  -3  -5  501.85   22.00
   9   3   5  497.15   21.40
  -9   3  -5  500.05   21.50
   9   3   5  517.65   23.10
 -11  -3  -5  919.71   37.60
  11   3   5  933.51   38.60
 -11   3  -5  838.82   54.59
  11   3   5  908.91   36.80
 -11   3  -5  917.31   37.10
 -13  -3  -5  665.83   29.20
  13   3   5  682.53   30.30
 -13   3  -5  661.83   28.80
  13   3   5  679.23   28.50
 -15  -3  -5  279.87   15.30
  15   3   5  298.37   15.00
  15   3   5  278.07   16.60
 -15   3  -5  290.87   15.30
  17  -3   5  116.09    9.40
 -17  -3  -5  101.39    9.60
 -17   3  -5  110.89    9.60
  17   3   5  111.09    9.50
 -19  -3  -5   11.10    4.10
  19  -3   5   10.70    3.90
  19   3   5   14.40    4.00
 -19   3  -5   13.40    4.10
  21  -3   5   19.90    4.80
 -21  -3  -5   26.90    5.10
  21   3   5   22.80    4.90
 -21   3  -5   22.40    5.20
  23  -3   5    1.70    4.40
 -23  -3  -5    4.60    4.40
 -23   3  -5  -13.50   16.40
  23   3   5   12.50    4.50
 -23   3  -5   -0.70    4.10
 -28  -4   5  377.16   19.90
  28   4  -5  373.36   18.90
 -28   4   5  367.36   20.50
 -26  -4   5  526.35   24.90
 -26   4   5  536.45   25.80
  26   4  -5  539.05   24.10
 -24  -4   5  498.75   23.00
  24   4  -5  508.35   22.30
 -24   4   5  484.75   23.70
 -22  -4   5  547.45   30.60
 -22  -4   5  667.43   27.30
  22   4  -5  580.44   34.00
 -22   4   5  643.54   28.10
  22   4  -5  677.43   26.60
 -20  -4   5  165.48   13.50
 -20  -4   5  195.18   10.60
 -20   4   5  189.78   11.50
  20   4  -5  196.98   10.20
 -18  -4   5  108.39   11.00
 -18  -4   5  126.69    7.60
 -18   4   5  111.79    8.30
  18   4  -5  124.29    7.20
 -18   4   5   90.09   20.90
 -16  -4   5   -0.50    1.60
 -16  -4   5   -2.50    3.20
 -16   4   5    1.50    5.60
 -16   4   5    0.50    1.90
 -14  -4   5  132.19    9.70
 -14  -4   5  129.79    6.80
  14   4  -5  125.79    6.40
 -14   4   5  124.69    7.70
 -14   4   5   96.49   16.70
 -12  -4   5   46.40    6.30
 -12  -4   5   54.39    3.80
 -12   4   5   44.80    5.00
  12   4  -5   55.99    3.50
 -10  -4   5    1.80    2.20
 -10  -4   5    4.70    1.10
  10  -4  -5   11.90    7.70
  10   4  -5    2.40    0.90
 -10   4   5    7.60    2.00
   8  -4  -5 2143.79   92.59
  -8  -4   5 2154.38   83.29
  -8   4   5 2092.79   82.59
  -8   4   5 2157.48   82.39
   6  -4  -5 2725.53  117.19
  -6  -4   5 2457.35  114.49
  -6  -4   5 3029.60  108.39
  -6   4   5 2933.31  107.79
  -6   4   5 2898.11  107.99
  -4  -4   5 1966.60   72.69
  -4   4   5 1837.82   72.09
  -4   4   5 1800.22   72.69
  -2  -4   5 2866.21  111.39
   2  -4  -5 3389.06  122.89
  -2   4   5 2686.83  110.99
  -2   4   5 2680.23  111.89
   0  -4   5 1064.49   40.90
   0   4   5 1022.30   42.00
   0   4   5 1008.80   40.60
   2  -4   5 1693.93   65.29
   2   4   5 1679.43   65.39
   2   4   5 1708.03   67.09
  -2   4  -5 1665.73   64.59
   4  -4   5  558.14   36.60
  -4  -4  -5  541.55   35.60
   4  -4   5  590.54   23.70
  -4   4  -5  600.34   23.40
   4   4   5  619.24   26.00
   4   4   5  617.34   24.10
  -4   4  -5  523.45   36.70
   6  -4   5  774.22   31.30
   6   4   5  792.62   34.00
   6   4   5  809.32   31.90
  -6   4  -5  773.72   31.50
  -8  -4  -5  106.09    7.50
   8  -4   5   91.19    6.10
   8   4   5  126.79    9.30
  -8   4  -5   94.39    6.60
   8   4   5  118.49    7.10
 -10  -4  -5    2.60    2.10
  10   4   5    1.80    2.10
 -10   4  -5    5.90   10.60
 -10   4  -5   -2.50    1.70
  10   4   5    5.10    3.00
 -12  -4  -5   23.00    3.40
  12   4   5   22.20    4.40
  12   4   5   19.50    3.20
 -12   4  -5   21.00    3.20
 -14  -4  -5  482.45   22.60
 -14   4  -5  481.65   22.20
  14   4   5  486.05   24.30
  14   4   5  480.45   21.80
 -16  -4  -5  153.18   10.90
  16   4   5  128.99   12.70
 -16   4  -5  142.59   10.60
  16   4   5  154.78   10.60
 -18  -4  -5  144.99   11.40
 -18   4  -5  131.39   11.10
  18   4   5  141.69   10.90
  20  -4   5  640.34   28.90
 -20  -4  -5  608.04   29.50
 -20   4  -5  608.74   29.40
  20   4   5  656.13   28.90
  22  -4   5  436.26   22.70
 -22  -4  -5  435.06   23.40
 -22   4  -5  438.06   23.40
  22   4   5  454.65   22.60
 -27   5   5  286.67   34.80
  25   5  -5  966.90   39.50
 -25   5   5  931.21   41.00
 -23  -5   5 1101.59   42.80
 -23  -5   5  924.11   49.50
 -23   5   5 1036.60   43.40
 -23   5   5  931.71   58.49
  23   5  -5 1040.90   54.09
  23   5  -5 1108.29   41.80
 -21  -5   5  435.16   19.80
 -21  -5   5  392.06   22.40
  21   5  -5  462.75   28.20
 -21   5   5  422.76   20.50
 -21   5   5  427.06   34.90
  21   5  -5  438.06   19.00
 -19  -5   5    6.90    4.50
 -19  -5   5    7.80    2.50
  19   5  -5   17.40    7.10
  19   5  -5    4.80    2.20
 -19   5   5    6.10    7.20
 -19   5   5    3.80    2.60
 -17  -5   5  125.69   11.30
 -17  -5   5  118.19    7.40
 -17   5   5  117.19    8.10
  17   5  -5  115.89    6.90
 -17   5   5   96.89   19.70
 -15  -5   5  128.09    7.20
 -15  -5   5  121.39   10.70
  15   5  -5  119.99    6.70
 -15   5   5  129.99   20.10
 -15   5   5  120.79    8.00
 -13  -5   5  377.46   15.60
 -13  -5   5  372.06   18.80
  13   5  -5  353.16   15.10
 -13   5   5  367.76   16.70
 -11  -5   5   24.50    3.90
 -11  -5   5   34.60    3.10
  11   5  -5   34.50    2.80
 -11   5   5   34.20    4.60
  -9  -5   5  626.24   27.70
  -9   5   5  644.94   26.60
  -9   5   5  644.44   26.40
  -7  -5   5  311.47   14.90
  -7   5   5  295.17   14.00
  -7   5   5  294.57   13.80
  -5  -5   5 1183.68   62.59
  -5  -5   5 1493.15   54.49
  -5   5   5 1404.66   54.29
  -5   5   5 1372.46   53.49
   3  -5  -5 5915.91  227.28
  -3  -5   5 5785.92  215.68
  -3   5   5 5418.06  216.18
  -3   5   5 5501.25  214.98
  -1  -5   5 3438.06  128.29
  -1   5   5 3285.47  127.79
  -1   5   5 3298.37  129.59
   1  -5   5 6084.39  217.38
  -1  -5  -5 4945.91  227.28
   1   5   5 5771.72  217.08
   1   5   5 5931.91  219.48
  -1   5  -5 5802.82  228.78
  -1   5  -5 5715.93  216.08
   3  -5   5 3064.49  113.69
  -3   5  -5 2816.62  126.59
   3   5   5 3003.00  116.39
   3   5   5 3001.80  113.69
  -3   5  -5 2922.61  112.89
   5  -5   5  416.06   18.40
   5  -5   5  424.86   35.10
  -5   5  -5  428.76   18.20
   5   5   5  426.06   18.70
  -5   5  -5  467.15   34.70
   5   5   5  456.25   21.80
   7  -5   5   -0.70    9.40
   7  -5   5   -1.80    1.60
  -7   5  -5   -0.30    8.30
   7   5   5    1.30    2.00
  -7   5  -5   -1.40    1.40
   9  -5   5   68.29    6.60
   9   5   5   68.19    6.30
   9   5   5   89.89    9.30
  -9   5  -5   75.89    6.00
 -11  -5  -5  278.27   14.40
  11   5   5  268.07   13.70
 -11   5  -5  277.87   13.70
  11   5   5  281.47   17.00
 -13  -5  -5  386.66   19.20
  13   5   5  381.66   18.50
 -13   5  -5  406.56   18.90
  13   5   5  404.86   21.90
 -15  -5  -5    0.20    2.90
 -15   5  -5    1.40   14.10
  15   5   5   -1.40    4.00
  15   5   5    2.60    2.90
 -15   5  -5   -1.20    2.70
 -17  -5  -5  103.09    9.80
 -17   5  -5  105.49    9.80
  17   5   5  115.19    9.70
  17   5   5   87.29   12.40
 -19  -5  -5  312.87   18.10
 -19   5  -5  316.47   18.10
  19   5   5  325.57   17.20
 -21  -5  -5  661.23   32.30
  21   5   5  712.83   31.60
 -21   5  -5  714.63   32.90
 -26   6   5  223.98   30.30
 -26   6   5  252.87   15.80
 -24   6   5  244.58   15.10
 -24   6   5  238.38   29.80
 -22  -6   5  532.85   28.30
  22   6  -5  602.94   34.10
 -22   6   5  567.64   41.30
 -22   6   5  572.44   26.30
 -20   6   5   30.90   10.20
  20   6  -5   26.40    8.40
 -18  -6   5   86.29   11.60
 -18   6   5   83.39   21.80
  18   6  -5  107.29    7.90
 -18   6   5  105.59    8.50
 -16  -6   5    8.60    2.60
 -16  -6   5   11.90    4.70
  16   6  -5    8.80    2.10
 -16   6   5   10.40    2.70
  16   6  -5   15.10    7.10
 -16   6   5    1.60    8.80
 -14  -6   5   10.60    4.40
 -14  -6   5   13.60    2.20
 -14   6   5   17.70    3.00
  14   6  -5   24.10    3.50
  14   6  -5    9.00    6.30
 -12  -6   5  117.59    6.40
 -12  -6   5  111.79   10.40
 -12   6   5  117.29    7.90
  12   6  -5  112.99    5.90
 -10  -6   5  258.07   14.90
 -10   6   5  265.87   12.90
 -10   6   5  259.87   12.90
  -8  -6   5  654.43   28.60
  -8   6   5  635.34   27.00
  -8   6   5  653.03   27.40
  -6  -6   5  729.83   30.40
  -6   6   5  704.83   29.10
  -6   6   5  678.13   29.80
  -4  -6   5 2035.50   78.49
  -4   6   5 1953.20   78.89
  -4   6   5 1990.70   77.39
  -2  -6   5 1269.77   51.29
  -2   6   5 1314.57   50.59
  -2   6   5 1298.47   52.79
   2   6  -5 1235.88   55.09
   0  -6   5  219.68   11.70
   0   6   5  208.08   11.00
   0   6   5  225.28   13.60
   2  -6   5  972.10   38.30
  -2  -6  -5  894.41   53.29
  -2   6  -5  936.61   36.90
   2   6   5  997.00   41.70
   2   6   5  921.71   37.80
   4  -6   5  570.94   44.00
   4  -6   5  718.83   28.10
   4   6   5  722.13   32.10
   4   6   5  688.23   27.90
  -4   6  -5  622.14   42.00
  -4   6  -5  706.43   27.20
   6  -6   5  281.07   13.10
   6   6   5  284.57   17.50
  -6   6  -5  282.77   12.90
   6   6   5  267.77   13.30
   8   6   5  212.68   15.60
  -8   6  -5  231.58   11.20
   8   6   5  211.28   11.70
  10   6   5   -4.50    3.60
 -10   6  -5   -7.20   11.20
 -10   6  -5    0.00    2.00
  10   6   5   -3.90    2.50
  12   6   5  184.78   15.50
  12   6   5  169.08   10.90
 -12   6  -5  191.38   11.10
 -14  -6  -5   -2.40    3.20
  14   6   5    3.60    3.10
 -14   6  -5   -9.90   12.70
  14   6   5   -1.00    4.60
 -14   6  -5    3.20    3.00
 -16  -6  -5   38.30    5.60
  16   6   5   71.79    8.20
  16   6   5   39.20    7.30
 -16   6  -5   67.09    8.40
 -18  -6  -5  135.39   12.20
  18   6   5  169.18   11.50
 -18   6  -5  165.48   12.40
  18   6   5  148.89   15.50
 -20  -6  -5  180.58   14.10
 -20   6  -5  210.88   14.70
  20   6   5  206.08   13.70
 -25   7   5   -2.10    3.80
 -25   7   5    8.70    9.50
 -23  -7   5    7.40    5.10
 -23   7   5    8.30    9.40
 -23   7   5   -1.00    3.50
  23   7  -5    1.80    5.80
 -21  -7   5   11.50    5.40
 -21   7   5   16.30   10.00
  21   7  -5    9.90    7.30
 -21   7   5    9.20    3.80
 -19  -7   5   61.49   11.60
  19   7  -5   49.50   10.40
 -19   7   5   64.89    8.30
 -17  -7   5  336.97   20.20
  17   7  -5  288.17   25.70
 -17   7   5  342.67   16.80
 -15  -7   5  268.07   17.80
 -15   7   5  297.97   14.80
 -13  -7   5  826.12   37.70
 -13   7   5  845.32   34.90
 -11  -7   5  264.37   16.40
 -11   7   5  272.07   13.90
 -11   7   5  293.77   14.20
  -9  -7   5  520.35   24.60
  -9   7   5  518.65   23.00
  -9   7   5  497.25   22.40
  -7  -7   5   -1.50    2.90
   7  -7  -5    3.50   10.80
  -7   7   5    1.10    2.20
  -7   7   5    0.90    2.50
  -5  -7   5    0.60    2.90
   5  -7  -5   14.10   12.10
  -5   7   5   -2.00    2.00
  -5   7   5    2.20    2.50
  -3  -7   5   -0.40    2.60
   3  -7  -5    3.50   11.50
  -3   7   5    4.10    2.80
  -3   7   5   -1.90    2.00
  -1  -7   5    4.80    2.90
   1  -7  -5  -11.10   10.80
  -1   7   5    7.20    3.40
  -1   7   5    5.80    2.30
   1  -7   5  182.58   11.10
   1   7   5  192.18   13.90
   1   7   5  176.78   10.10
  -3  -7  -5  -12.40   13.30
   3  -7   5    7.50   11.20
   3  -7   5    1.10    2.80
   3   7   5    5.50    2.40
  -3   7  -5    2.70    1.70
   3   7   5    5.30    3.90
   5  -7   5  231.28   13.10
   5   7   5  240.28   12.60
  -5   7  -5  253.77   12.00
  -5   7  -5  298.17   30.00
   5   7   5  242.08   17.40
  -7  -7  -5   43.90   16.40
   7  -7   5   62.69    7.10
   7   7   5   68.19   11.40
  -7   7  -5   51.29   13.40
  -7   7  -5   72.89    6.20
   7   7   5   65.69    6.80
   9   7   5  187.48   16.90
  -9   7  -5  215.58   11.40
   9   7   5  199.98   11.50
  11   7   5 1205.78   49.00
 -11   7  -5 1265.57   49.40
  11   7   5 1155.88   54.99
  13   7   5  131.09    9.80
 -13   7  -5  129.89    9.80
  13   7   5  111.69   14.80
 -15   7  -5  308.37   16.60
  15   7   5  277.67   21.30
  15   7   5  308.37   15.90
  17   7   5   15.80    4.10
  17   7   5   13.10    6.40
 -17   7  -5   11.50    4.20
 -17   7  -5   13.50   15.00
 -19   7  -5   -6.90   14.20
 -19   7  -5   -5.30    3.50
  19   7   5   -1.20    3.60
  19   7   5   -9.30    5.20
 -24  -8   5  133.79   14.40
  24   8  -5  153.98   18.20
 -24   8   5  163.28   12.40
 -24   8   5  164.58   27.90
 -22  -8   5   28.30    6.50
 -22   8   5   29.00   11.60
 -22   8   5   33.30    5.20
  22   8  -5   22.60    7.90
 -20  -8   5   -3.80    4.70
 -20   8   5   -0.80    3.00
  20   8  -5   -6.10    6.10
 -18  -8   5  308.07   19.30
  18   8  -5  243.98   23.50
 -18   8   5  293.97   15.60
 -16  -8   5  721.93   33.80
  16   8  -5  619.74   39.00
 -16   8   5  724.63   30.30
 -14  -8   5  759.42   35.50
 -14   8   5  793.32   32.20
  14   8  -5  686.93   41.30
 -12  -8   5 1128.09   48.20
  12   8  -5  970.10   52.99
 -12   8   5 1187.98   45.20
 -10  -8   5  144.79   12.90
 -10   8   5  153.48    9.70
 -10   8   5  166.48   10.80
  10   8  -5  123.09   17.30
  -8  -8   5  300.47   17.30
  -8   8   5  303.37   14.80
  -8   8   5  299.47   16.30
  -6  -8   5    9.00    3.80
  -6   8   5    6.60    2.60
  -6   8   5    7.30    3.40
   4  -8  -5  314.97   38.60
  -4  -8   5  326.27   17.30
  -4   8   5  307.77   18.30
  -4   8   5  320.57   15.30
  -2  -8   5  655.93   29.30
  -2   8   5  638.54   31.60
  -2   8   5  664.43   27.70
   0  -8   5 1194.78   47.60
   0   8   5 1152.08   46.10
   0   8   5 1091.79   50.79
   4  -8   5   31.60    4.60
   4   8   5   36.50    7.00
  -4   8  -5   35.60    4.80
   6  -8   5  329.37   17.30
   6   8   5  330.37   22.60
   6   8   5  356.76   16.40
  -6   8  -5  338.57   15.80
   8   8   5  340.77   23.70
  -8   8  -5  362.46   16.90
   8   8   5  339.27   16.70
  10   8   5  953.70   47.70
  10   8   5  924.01   40.00
 -10   8  -5 1049.79   40.80
 -12   8  -5  899.11   36.40
  12   8   5  821.92   35.40
  12   8   5  811.42   43.00
 -14   8  -5  528.75   24.50
  14   8   5  485.65   30.60
  14   8   5  504.15   23.40
  16   8   5   83.09    9.00
 -16   8  -5   71.09    9.40
  18   8   5    2.80    3.50
 -18   8  -5   -0.80    3.90
 -23  -9   5   47.90    7.80
  23   9  -5   45.10    9.70
 -21  -9   5   30.50    6.90
 -21   9   5   33.20    5.00
  21   9  -5   32.20    9.30
 -19  -9   5    0.80    5.10
 -19   9   5    6.70    3.30
  19   9  -5    3.90    6.70
 -17  -9   5  121.89   13.40
 -17   9   5  111.79    9.60
  17   9  -5  113.49   17.80
 -15  -9   5  352.86   21.00
 -15   9   5  338.17   17.20
  15   9  -5  325.97   26.60
 -13  -9   5  560.54   29.00
 -13   9   5  575.94   25.50
 -11  -9   5   79.79   12.30
  11   9  -5  116.99   19.30
 -11   9   5  100.09    8.70
  -9  -9   5  146.39   14.00
   9  -9  -5  172.78   40.00
  -9   9   5  166.18   12.70
   9   9  -5  217.68   20.90
  -9   9   5  159.68   10.60
   7  -9  -5  187.58   41.30
  -7  -9   5  259.27   16.50
  -7   9   5  240.08   16.00
  -7   9   5  263.47   13.20
   7   9  -5  198.48   21.40
   5  -9  -5  120.59   37.60
  -5  -9   5  105.79   11.30
   5   9  -5   88.59   16.30
  -5   9   5   99.09   11.80
  -5   9   5  110.19    8.70
   3  -9  -5  356.06   46.60
  -3  -9   5  406.66   20.80
  -3   9   5  407.86   18.40
  -3   9   5  368.06   22.70
   1  -9  -5  485.75   51.49
  -1  -9   5  447.86   22.50
  -1  -9   5  458.15   45.80
  -1   9   5  437.76   20.30
  -1   9   5  414.16   25.50
   1  -9   5  170.78   38.20
   1  -9   5  153.18   11.90
  -1  -9  -5  135.69   39.80
   1   9   5  143.09    9.80
   1   9   5  125.59   14.80
   3  -9   5  122.49   10.80
   3   9   5  128.89    9.40
   3   9   5  115.49   14.50
   5  -9   5   -6.20   15.40
   5  -9   5    2.40    3.70
  -5  -9  -5   -8.20   16.40
   5   9   5    9.00    3.20
   5   9   5    1.60    5.00
  -7  -9  -5   21.30   17.80
   7   9   5   17.10    6.70
   7   9   5   18.00    3.50
   9   9   5  179.88   18.70
   9   9   5  193.28   11.50
  11   9   5  288.47   23.60
  11   9   5  322.97   16.00
  13   9   5  324.57   16.60
  13   9   5  314.57   25.20
  15   9   5   99.29    9.40
 -15   9  -5   90.19   12.50
  17   9   5   -9.90    7.10
 -17   9  -5   -0.30    4.90
  17   9   5    2.00    3.80
 -22 -10   5    5.50    6.00
 -22  10   5    7.70    4.10
  22  10  -5    4.80    7.10
 -20 -10   5    3.00    5.90
  20  10  -5    9.40    7.40
 -20  10   5    9.30    4.00
 -18 -10   5    8.30    6.10
 -18  10   5   14.60    4.00
  18  10  -5   10.40    7.60
 -16 -10   5   36.00    7.00
 -16  10   5   32.10    4.80
  16  10  -5   26.80    9.10
 -14 -10   5   24.20    6.10
  14  10  -5   14.90    7.90
 -14  10   5   25.30    4.10
 -12 -10   5  152.98   14.20
 -12  10   5  150.98   10.50
 -10 -10   5   34.50    6.70
  10  10  -5   13.50    8.90
 -10  10   5   34.30    4.50
  -8 -10   5   -5.00    5.10
   8 -10  -5   -8.60   18.60
  -8  10   5    1.10    3.00
   8  10  -5    1.30    7.90
  -8  10   5   -1.80    4.20
   6 -10  -5   -5.50   18.50
  -6  10   5   -8.00    4.30
   6  10  -5   -5.10    8.00
  -6  10   5    1.10    2.90
  -4 -10   5   23.00   15.10
   4 -10  -5   35.90   20.60
   4  10  -5   27.60    9.00
  -2 -10   5   12.70   15.60
   2 -10  -5   30.60   19.80
  -2  10   5    5.20    3.20
   2  10  -5   23.00    8.40
   0 -10   5    2.50    4.50
   0 -10   5   -1.40   16.30
   0 -10  -5    3.00   17.90
   0  10   5   -6.10    4.90
   0  10   5    0.40    2.90
   2 -10   5    6.50    4.50
   2 -10   5    6.00   17.20
  -2 -10  -5   14.20   18.10
   2  10   5    0.80    3.10
   2  10   5   -4.80    5.40
  -2  10  -5    0.30    6.30
   4 -10   5    1.90    3.90
   4 -10   5   -0.50   16.80
  -4 -10  -5   -4.00   16.90
   4  10   5    1.70    3.10
   4  10   5   -5.10    5.20
  -4  10  -5   -0.40    6.40
  -6 -10  -5    1.60   17.10
   6  10   5    3.20    6.30
   8  10   5   29.00    7.90
  10  10   5   36.60    9.40
 -12 -10  -5    0.40   23.10
  12  10   5    2.30    3.40
  12  10   5   -3.70    6.80
 -14 -10  -5    7.80   19.20
  14  10   5   32.30    4.90
  14  10   5   19.50    9.00
  16  10   5   -5.90    7.60
  16  10   5    7.60    4.20
 -19 -11   5   26.60    7.00
  19  11  -5   24.60    8.50
 -19  11   5   27.90    4.90
 -17 -11   5  321.27   21.60
  17  11  -5  365.36   27.80
 -17  11   5  312.67   17.70
 -15 -11   5  431.36   24.90
  15  11  -5  403.96   30.10
 -15  11   5  414.36   20.80
 -13 -11   5  827.22   38.60
  13  11  -5  742.33   43.90
 -13  11   5  802.92   34.50
 -11 -11   5  594.34   29.40
 -11  11   5  565.14   25.30
  11  11  -5  479.15   34.10
  -9 -11   5  364.56   21.30
  -9  11   5  351.26   17.40
   9  11  -5  275.67   25.80
  -7 -11   5   12.20   14.90
   7 -11  -5   18.20   21.20
  -7 -11   5    1.00    5.20
   7  11  -5   23.40    8.90
  -5 -11   5    5.60    5.60
   5 -11  -5   -9.60   19.40
  -5 -11   5   10.10   14.90
  -5  11   5   12.50    5.90
  -5  11   5   17.90    3.70
   5  11  -5    8.80    8.40
  -3 -11   5   14.40   16.10
  -3 -11   5   32.40    6.80
   3  11  -5   21.00    8.70
  -3  11   5   39.70    7.70
  -3  11   5   51.29    7.60
   1  11  -5  184.38   19.90
   1 -11   5   33.10   18.70
  -1 -11  -5   24.60   19.40
  -1  11  -5   50.89    9.20
   1  11   5   78.29   13.90
  -3 -11  -5   13.30   17.80
   3 -11   5   -2.20   19.10
   3 -11   5   -3.70    4.40
   3  11   5  -10.10    5.10
  -3  11  -5   -4.50    5.80
   3  11   5   -0.40    3.10
  -5 -11  -5   10.80   17.50
   5  11   5    7.80    7.20
   7  11   5  370.56   17.90
   7  11   5  317.77   26.10
   9  11   5  222.98   23.10
   9  11   5  265.97   14.60
  11  11   5  376.76   29.60
  11  11   5  405.56   19.80
  13  11   5  242.28   25.30
  13  11   5  267.77   15.40
 -16 -12   5  463.55   26.40
  16  12  -5  444.26   32.00
 -16  12   5  427.36   22.10
 -14 -12   5  598.74   31.60
 -14  12   5  581.04   27.40
  14  12  -5  612.44   37.90
 -12 -12   5  575.04   30.50
  12  12  -5  572.84   36.70
 -12  12   5  552.84   26.30
 -10 -12   5  552.54   29.10
  10  12  -5  529.35   34.90
 -10  12   5  522.15   25.00
  -8 -12   5  141.39   14.50
  -8  12   5  113.09   10.40
   8  12  -5  116.89   19.20
  -6 -12   5   11.90    5.60
   6 -12  -5   10.40   21.10
  -6 -12   5   -4.90   16.80
  -6  12   5   -2.20    5.10
   6  12  -5    4.60    7.10
  -6  12   5    1.60    3.50
   4 -12  -5   23.40   20.30
  -4 -12   5   28.30   18.40
  -4 -12   5   22.50    6.10
  -4  12   5   25.00    4.30
   4  12  -5   28.80    8.60
  -4  12   5   19.60    6.70
  -2 -12   5  146.29   14.00
  -2  12   5  126.39   10.40
   2  12  -5  135.69   17.70
  -2  12   5  131.19   16.10
   0 -12   5   19.80    6.00
   0 -12  -5   11.00   19.30
   0 -12   5   16.40   19.40
   0  12   5   22.10    4.30
   0  12   5   20.40    7.20
   0  12  -5   23.00    7.50
  -2 -12  -5   29.50   19.70
   2 -12   5   22.80   21.00
   2 -12   5   45.90    9.30
   2  12   5   43.60    9.20
  -2  12  -5   26.90    9.30
  -4 -12  -5  124.09   43.20
   4  12   5   43.70    9.70
   4  12   5   72.79    8.70
   6  12   5  124.09   10.60
   6  12   5  122.89   18.90
   8  12   5  232.28   24.00
   8  12   5  257.57   14.90
  10  12   5  385.46   19.50
  10  12   5  346.97   29.20
 -13 -13   5  129.19   15.50
 -13  13   5  123.89   11.20
  13  13  -5  162.38   21.00
 -11 -13   5   82.59   13.70
 -11 -13   5   43.60   21.60
  11  13  -5  102.89   19.10
 -11  13   5   69.59    9.70
  -9 -13   5   52.59   22.40
  -9 -13   5  103.89   14.20
   9  13  -5  114.39   19.50
  -9  13   5   78.29    9.90
  -7 -13   5  133.79   15.00
  -7  13   5  117.19   11.30
   7  13  -5  129.59   19.50
  -5 -13   5   12.70    6.30
  -5 -13   5    4.60   19.90
   5  13  -5    4.50    7.10
  -5  13   5   -6.80    6.50
  -5  13   5   -4.70    3.80
   3 -13  -5   20.30   19.80
   3  13  -5   29.80    8.30
  -3  13   5   32.10    5.10
  -3  13   5   32.30    8.70
  -1 -13   5   -2.40   22.30
  -1 -13   5   29.00    6.50
   1 -13  -5   29.00   19.70
  -1  13   5   15.90    4.50
  -1  13   5   12.70    7.40
   1  13  -5   19.80    7.70
   1 -13   5    9.50   22.10
  -1 -13  -5   26.00   20.10
  -3 -13  -5   39.50   21.50
   3  13   5   73.09    9.50
   3  13   5   49.20   10.20
  -5 -13  -5   50.09   25.10
   5  13   5   26.40    4.90
   5  13   5   19.90    9.10
  -7 -13  -5   48.40   22.50
   7  13   5   33.10    7.70
   7  13   5   27.70    9.60
  -6 -14   5  107.09   14.50
   6  14  -5  100.59   18.40
  -6  14   5   83.59   10.70
  -4 -14   5  359.76   22.00
   4  14  -5  314.87   25.80
  -4  14   5  298.07   19.90
  -2 -14   5  227.28   17.80
  -2  14   5  203.58   21.30
   2  14  -5  222.78   21.50
   0 -14  -5  136.09   47.40
   2  14   5  107.89   18.30
 -30   0   6  532.05   26.30
 -28   0   6  311.27   17.50
 -26   0   6   35.30    5.00
 -24   0   6   -1.10    3.00
 -22   0   6   71.49    7.30
 -20   0   6  481.35   21.30
 -18   0   6 1020.90   41.00
 -16   0   6  150.08    8.20
 -16   0   6  146.09    8.10
 -14   0   6  204.18   10.00
 -14   0   6  208.98    9.90
 -12   0   6  546.15   22.30
 -12   0   6  532.75   21.90
 -10   0   6 2892.31  109.69
 -10   0   6 2841.92  109.29
  -8   0   6 3816.82  140.59
  -8   0   6 3921.21  141.19
  -8   0   6 3363.26  145.29
  -6   0   6 3490.15  136.39
  -6   0   6 3694.53  137.09
  -4   0   6 4247.77  166.98
  -4   0   6 4568.54  167.78
  -2   0   6 1128.89   41.70
   2   0  -6  995.00   50.29
  -2   0   6 1047.70   40.80
   0   0   6 1977.40   75.79
   0   0   6 1950.01   75.09
  -2   0  -6  161.98    7.70
   2   0   6  150.98    8.30
   2   0   6  152.18    7.30
  -4   0  -6  394.06   32.80
   4   0   6  367.76   16.70
   4   0   6  381.86   16.00
  -4   0  -6  391.26   16.50
  -6   0  -6 4445.16  166.58
   6   0   6 4248.67  166.38
   6   0   6 4381.06  165.98
  -8   0  -6  537.25   23.20
   8   0   6  544.75   23.20
   8   0   6  551.24   22.70
  10   0   6  179.18   10.40
  10   0   6  178.98    9.70
 -10   0  -6  168.98   10.00
  12   0   6  327.37   16.10
  12   0   6  329.07   15.60
 -12   0  -6  320.97   16.10
  14   0   6 1084.19   43.80
 -14   0  -6 1059.49   44.50
 -16   0  -6 1520.65   63.49
  16   0   6 1607.64   62.79
 -18   0  -6 1273.97   54.79
  18   0   6 1361.16   54.09
  20   0   6  918.81   39.00
 -20   0  -6  870.91   39.60
  22   0   6  298.57   17.60
 -22   0  -6  275.67   17.90
 -29  -1   6  271.27   16.40
 -29   1   6  260.37   16.30
 -27  -1   6   37.50    5.40
 -27   1   6   56.69    8.70
 -25  -1   6   13.90    3.80
 -25   1   6   13.90    4.00
 -23  -1   6   30.70    4.20
 -23   1   6   23.50    4.00
 -21  -1   6  112.69    8.10
 -21   1   6  102.39    8.30
 -19  -1   6   21.90    3.00
 -19   1   6   21.00    3.10
 -17  -1   6  359.66   15.80
 -17  -1   6  349.37   16.30
 -17   1   6  348.47   15.90
 -15  -1   6  115.39    6.90
 -15  -1   6  130.79    7.50
 -15   1   6  112.19    7.20
 -13  -1   6   81.59    5.60
 -13  -1   6   59.89    4.80
 -13   1   6   79.79    5.20
 -13   1   6   74.39    5.30
 -11  -1   6  311.47   13.60
 -11  -1   6  291.27   12.70
 -11   1   6  297.67   13.10
 -11   1   6  308.17   13.20
  -9  -1   6 1357.16   53.39
  -9  -1   6 1425.16   54.29
  -9   1   6 1414.06   53.99
  -9   1   6 1367.36   53.89
  -7  -1   6 2663.63   97.19
   7  -1  -6 2396.16  102.99
  -7  -1   6 2524.65   96.19
  -7   1   6 2542.65   96.69
  -7   1   6 2536.25   96.99
   5  -1  -6 6093.29  239.58
  -5  -1   6 6637.94  232.28
  -5  -1   6 6093.09  231.18
  -5   1   6 6371.96  232.18
   5   1  -6 5404.06  236.68
  -5   1   6 6103.19  231.68
  -3  -1   6 1960.40   81.89
  -3  -1   6 2296.67   83.09
   3  -1  -6 2157.78   92.09
   3   1  -6 2293.57   89.99
  -3   1   6 2175.38   83.09
  -3   1   6 2064.99   82.39
  -1  -1   6  103.19    5.10
  -1  -1   6  105.89    6.40
  -1   1   6  111.99    6.60
  -1   1   6  108.09    5.60
   1  -1   6   34.50    2.80
   1  -1   6   28.80    4.20
  -1   1  -6   30.30    2.80
   1   1   6   31.30    4.20
   1   1   6   31.60    3.20
   3  -1   6  358.36   15.10
   3  -1   6  344.57   15.80
  -3  -1  -6  431.76   32.00
  -3  -1  -6  343.17   15.70
  -3   1  -6  399.66   29.30
   3   1   6  357.66   15.30
   3   1   6  342.77   16.10
  -3   1  -6  362.26   15.50
   5  -1   6  205.48    9.60
   5  -1   6  202.78   10.30
  -5  -1  -6  217.28   10.40
  -5   1  -6  213.88   10.10
   5   1   6  202.28    9.80
   5   1   6  205.48   10.80
   7  -1   6   28.10    4.80
   9  -1   6  107.49    7.00
  -9  -1  -6  108.09    7.40
   9  -1   6  114.69    7.70
   9   1   6   94.99    8.20
   9   1   6  109.99    7.10
  -9   1  -6  100.09    7.20
  11  -1   6  141.39    8.90
 -11  -1  -6  133.19   30.90
  11  -1   6  137.99    8.40
 -11  -1  -6  123.99    8.90
 -11   1  -6  132.69    8.60
  11   1   6  121.99    8.30
  11   1   6  122.59    9.70
 -11   1  -6   94.69   29.10
  13  -1   6  131.59    8.70
 -13  -1  -6  111.69    9.20
 -13   1  -6  163.38   32.20
 -13   1  -6  119.79    8.90
  13   1   6  118.49    9.90
  13   1   6  113.79    8.90
 -15  -1  -6  334.67   18.00
  15  -1   6  361.26   17.30
  15   1   6  336.27   17.40
 -15   1  -6  353.76   17.70
 -17  -1  -6  410.16   21.40
  17  -1   6  443.76   20.90
 -17   1  -6  414.36   21.30
  17   1   6  442.76   21.10
 -19  -1  -6  605.94   28.90
  19  -1   6  631.94   28.40
 -19   1  -6  587.74   28.80
  19   1   6  636.24   28.50
 -21  -1  -6  373.86   20.70
  21  -1   6  369.96   20.20
  21   1   6  393.96   20.20
 -21   1  -6  351.56   20.60
 -23  -1  -6  206.08   15.90
  23  -1   6  233.28   16.00
 -23   1  -6  202.38   16.00
  23   1   6  246.68   15.90
 -28  -2   6   10.10    4.10
 -28   2   6    3.40    4.10
  28   2  -6    7.70    3.60
 -26  -2   6   53.89    8.30
 -26   2   6   38.40    5.40
 -24  -2   6   19.50    3.80
 -24   2   6    7.10   10.60
 -24   2   6   14.70    4.00
 -22  -2   6  316.17   15.70
 -22   2   6  320.67   16.10
 -20  -2   6  223.28   11.50
 -20  -2   6  217.48   13.20
 -20   2   6  225.58   12.00
 -20   2   6  191.08   25.70
 -18  -2   6  138.69    9.50
 -18  -2   6  142.29    8.00
 -18   2   6  137.49    8.40
 -18   2   6  108.19   19.40
 -16  -2   6  306.87   13.60
 -16  -2   6  306.27   14.90
 -16   2   6  310.77   23.00
 -16   2   6  291.77   14.10
 -14  -2   6  207.98   10.60
 -14  -2   6  200.08    9.20
 -14   2   6  198.08   10.10
 -14   2   6  161.98   18.30
 -12  -2   6  428.66   18.20
 -12  -2   6  457.65   19.50
 -12   2   6  438.06   19.10
 -12   2   6  471.35   18.70
 -10  -2   6  147.09    6.70
 -10  -2   6  147.69    8.30
 -10   2   6  144.09    7.80
 -10   2   6  154.98    7.80
  -8  -2   6   70.69    5.30
  -8   2   6   69.89    4.80
  -8   2   6   69.09    5.10
   4  -2  -6   61.79   18.40
  -2  -2   6    5.00    1.80
   2  -2  -6   12.00    9.00
  -2   2   6    5.10    1.50
   2   2  -6    3.90    6.50
  -2   2   6    6.10    1.80
   0  -2  -6  582.04   40.70
   0  -2   6  729.03   27.70
   0  -2   6  752.62   28.80
   0   2   6  741.33   29.30
   0   2  -6  758.02   28.00
   0   2   6  704.33   28.40
   2  -2   6  661.43   26.30
   2  -2   6  625.14   25.30
   2   2   6  640.24   26.90
   2   2   6  642.34   26.00
  -2   2  -6  653.73   25.70
  -4  -2  -6 1974.00   76.29
   4  -2   6 1938.51   75.29
   4  -2   6 2029.60   75.99
  -4   2  -6 1873.51   88.69
  -4   2  -6 2002.70   75.79
   4   2   6 1940.81   75.79
   4   2   6 1989.80   76.89
  -6  -2  -6 1180.68   60.89
   6  -2   6 1150.58   45.60
   6  -2   6 1184.18   46.00
  -6  -2  -6 1155.08   46.60
   6   2   6 1151.28   46.00
  -6   2  -6 1177.18   46.10
  -6   2  -6 1164.98   61.59
   6   2   6 1173.68   47.20
  -8  -2  -6  204.08   11.10
   8  -2   6  215.48   10.70
   8  -2   6  195.08   10.10
  -8  -2  -6  251.57   30.10
   8   2   6  202.18   11.80
   8   2   6  185.18   10.50
  -8   2  -6  235.98   31.30
  -8   2  -6  204.38   10.50
  10  -2   6  121.79    7.80
  10  -2   6  123.79    8.60
 -10  -2  -6  129.69    8.70
 -10   2  -6  131.09    8.10
  10   2   6  126.79    8.20
  10   2   6  124.89    9.60
 -12  -2  -6   27.20    4.00
  12  -2   6   41.70    5.70
 -12   2  -6   42.80    5.80
  12   2   6   29.40    4.60
  12   2   6   39.10    6.00
  14  -2   6  116.59    9.00
 -14  -2  -6  111.19    9.50
  14   2   6  116.69    9.40
 -14   2  -6  110.89    9.00
  14   2   6  124.79   10.60
 -16  -2  -6   21.10    4.10
  16  -2   6   20.50    3.90
 -16   2  -6   18.20    3.80
  16   2   6   23.50    4.10
  18  -2   6    0.30    3.50
 -18  -2  -6    3.60    3.50
 -18  -2  -6   -6.00   12.00
  18   2   6    0.70    3.40
 -18   2  -6   -1.00    3.30
 -18   2  -6   -3.10   14.60
  20  -2   6   -2.50    4.00
 -20  -2  -6   -3.70    3.40
 -20  -2  -6   -3.00   12.00
 -20   2  -6  -12.30   14.90
 -20   2  -6   -2.00    3.80
  20   2   6   -2.40    3.80
 -22  -2  -6   -1.90    3.90
 -22  -2  -6   -5.00   11.90
  22  -2   6   -4.20    4.20
 -22   2  -6   -5.90    4.00
  22   2   6    0.60    4.30
 -22   2  -6  -13.30   15.80
 -29  -3   6   20.40    5.00
 -29   3   6   30.30    5.60
  29   3  -6   21.80    4.70
 -27  -3   6   21.80    4.80
  27   3  -6   19.50    4.40
 -27   3   6   28.80    5.20
 -25  -3   6   21.40    4.30
 -25   3   6   26.70    4.80
  25   3  -6   22.10    3.90
 -23  -3   6  154.58   10.30
 -23   3   6  155.68   10.90
 -21  -3   6  842.62   32.50
 -21  -3   6  763.42   34.40
  21   3  -6  649.43   38.60
 -21   3   6  832.82   33.10
 -19  -3   6 1240.48   48.10
 -19  -3   6 1141.59   49.99
 -19   3   6 1231.28   60.09
 -19   3   6 1209.28   48.70
 -17  -3   6  924.81   36.00
 -17  -3   6  896.51   38.10
 -17   3   6  875.01   46.30
 -15  -3   6  850.31   34.60
 -15  -3   6  877.31   36.60
 -15   3   6  881.21   35.60
 -15   3   6  890.71   45.40
 -13  -3   6    5.70    2.60
 -13  -3   6    7.90    1.50
 -13   3   6    4.70    2.00
  11  -3  -6   -1.30    7.30
 -11  -3   6   -1.50    2.00
 -11  -3   6    1.20    1.00
  -9  -3   6  465.25   20.00
  -9   3   6  468.95   19.70
  -9   3   6  456.65   19.50
   7  -3  -6 1617.04   69.69
  -7  -3   6 1565.34   70.09
  -7  -3   6 1529.95   59.29
  -7   3   6 1431.26   58.79
  -7   3   6 1434.96   58.99
  -5  -3   6 4322.37  162.98
   5  -3  -6 4672.53  174.28
  -5   3   6 4107.39  162.98
  -5   3   6 3988.20  162.48
  -3  -3   6   30.80    4.10
  -3   3   6   33.00    4.40
  -3   3   6   30.80    3.90
  -1  -3   6  203.78    9.90
  -1   3   6  202.68    9.60
  -1   3   6  205.08   10.50
   1  -3   6  207.38   10.10
   1  -3   6  197.88    8.80
   1   3   6  206.98    9.90
  -1   3  -6  222.78    9.20
   1   3   6  213.08   11.10
   3  -3   6 1618.54   64.39
   3  -3   6 1658.03   65.09
   3   3   6 1713.03   66.59
  -3   3  -6 1726.53   64.79
   3   3   6 1689.13   65.19
   5  -3   6 2564.14   99.79
  -5  -3  -6 2543.65  113.79
   5  -3   6 2644.24  100.29
  -5   3  -6 2675.93  100.29
   5   3   6 2577.34  100.39
   5   3   6 2663.93  101.99
   7  -3   6 3626.44  135.89
   7  -3   6 3485.95  135.59
  -7  -3  -6 3544.65  136.89
  -7   3  -6 3519.95  136.09
   7   3   6 3541.05  136.19
   7   3   6 3613.24  137.79
  -9  -3  -6 1951.40   78.29
   9  -3   6 2070.59   77.19
   9  -3   6 1971.60   77.19
   9   3   6 1998.20   77.59
  -9   3  -6 1962.60   77.69
   9   3   6 2001.40   79.29
 -11  -3  -6   86.39    7.40
  11  -3   6   76.79    6.60
  11   3   6   87.19    8.90
  11   3   6   88.79    7.10
 -11   3  -6   89.79    7.00
 -13  -3  -6   70.49    7.60
  13  -3   6   67.69    7.10
 -13   3  -6   54.39   16.20
  13   3   6   80.49    7.60
  13   3   6   69.69    9.20
 -13   3  -6   70.99    7.20
  15  -3   6  209.78   12.30
 -15  -3  -6  213.88   13.10
  15   3   6  228.68   12.70
  15   3   6  216.98   14.50
 -15   3  -6  199.88   12.70
 -17  -3  -6   56.89    8.10
  17  -3   6   31.60    4.70
  17   3   6   36.40    4.90
 -17   3  -6   33.50    4.90
 -19  -3  -6  326.07   18.60
  19  -3   6  333.37   17.90
 -19   3  -6  328.87   18.40
  19   3   6  346.17   18.30
  21  -3   6   62.29    9.70
 -21  -3  -6   61.89    9.70
 -21   3  -6   41.20    6.30
  28   4  -6   17.50    5.60
 -28   4   6   33.10    5.60
 -28   4   6    8.90   10.40
 -26  -4   6   -4.60    3.80
 -26   4   6    3.90    9.60
 -26   4   6    9.00    4.10
  26   4  -6    2.90    3.70
 -24  -4   6   26.00    4.40
  24   4  -6   24.00    4.10
 -24   4   6   20.70    9.80
 -24   4   6   36.00    5.00
 -22  -4   6  155.38    9.90
 -22  -4   6  141.79   12.70
 -22   4   6  118.89   23.10
  22   4  -6  160.28    9.20
 -22   4   6  144.59   10.50
 -20  -4   6  403.66   21.50
 -20  -4   6  436.36   18.50
  20   4  -6  438.76   17.90
 -20   4   6  412.66   19.30
 -20   4   6  385.36   31.10
  20   4  -6  362.56   26.50
 -18  -4   6  610.14   25.20
 -18  -4   6  579.44   28.00
  18   4  -6  624.64   24.70
 -18   4   6  582.64   26.00
 -18   4   6  617.94   38.20
 -16  -4   6  538.05   25.40
 -16  -4   6  548.45   22.70
 -16   4   6  558.74   35.10
 -16   4   6  551.24   23.90
  16   4  -6  560.54   22.30
 -14  -4   6  186.88   11.50
 -14  -4   6  189.88    8.80
 -14   4   6  192.08   10.10
  14   4  -6  180.38    8.50
  12  -4  -6   -3.90    7.40
 -12  -4   6    0.80    1.10
 -12  -4   6    1.30    2.30
 -12   4   6   -1.10    1.60
  12   4  -6    4.40    1.20
  10  -4  -6   18.00    8.30
 -10  -4   6   35.40    5.30
 -10   4   6   27.40    4.40
  -8  -4   6 3179.68  119.29
   8  -4  -6 2986.70  128.99
  -8   4   6 3119.29  118.79
   6  -4  -6 1207.88   63.19
  -6   4   6 1354.96   51.49
  -6   4   6 1368.76   51.89
  -4  -4   6 2559.44   92.19
   4  -4  -6 2149.69  102.79
  -4   4   6 2417.16   91.69
  -4   4   6 2399.36   92.39
   2  -4  -6    6.00    9.70
  -2  -4   6    7.90    2.20
  -2   4   6    6.60    2.20
  -2   4   6    4.60    2.00
   0  -4  -6  208.58   26.60
   0  -4   6  191.28    9.80
   0   4   6  190.78    9.70
   0   4   6  192.18   11.00
   0   4  -6  197.68   21.70
  -2  -4  -6  905.41   53.19
   2  -4   6  988.80   39.60
   2   4   6  992.30   41.30
   2   4   6  987.70   39.70
  -2   4  -6 1097.39   55.29
  -2   4  -6 1016.50   38.90
   4  -4   6 1592.54   66.39
  -4   4  -6 1692.93   66.29
   4   4   6 1692.83   66.79
  -4   4  -6 1919.21   83.59
   4   4   6 1692.73   68.69
   6  -4   6 1127.89   47.70
   6  -4   6 1237.28   62.89
   6   4   6 1163.78   48.10
  -6   4  -6 1371.66   65.79
  -6   4  -6 1197.48   48.00
   6   4   6 1222.88   50.39
   8  -4   6  519.45   22.70
  -8  -4  -6  548.95   24.20
  -8   4  -6  575.84   23.50
   8   4   6  573.64   25.90
  -8   4  -6  541.15   41.90
   8   4   6  547.55   23.40
 -10  -4  -6  106.39    8.30
  10   4   6  123.99   10.30
 -10   4  -6  105.49    7.60
  10   4   6  112.59    7.80
 -12  -4  -6  202.68   12.20
  12   4   6  209.68   11.80
  12   4   6  214.48   14.20
 -12   4  -6  203.88   11.70
 -14  -4  -6    4.60    2.90
 -14   4  -6   -7.80   12.70
  14   4   6    1.00    3.80
  14   4   6    1.90    2.90
 -14   4  -6   -0.30    2.60
 -16  -4  -6   29.10    4.60
  16  -4   6   29.50    4.30
 -16   4  -6   15.20   15.30
  16   4   6   31.70    5.80
 -16   4  -6   30.90    4.50
  16   4   6   29.30    4.50
 -18  -4  -6  165.98   12.80
  18  -4   6  184.48   12.20
  18   4   6  172.48   12.30
 -18   4  -6  178.88   12.70
 -20  -4  -6  182.78   13.60
  20  -4   6  178.28   13.10
 -20   4  -6  163.98   13.30
  20   4   6  194.28   13.30
  22  -4   6   72.49   10.60
 -22  -4  -6   70.29   10.70
 -22   4  -6   72.59   10.70
  22   4   6  101.49   11.20
 -27   5   6    1.90    9.20
 -27   5   6    1.00    4.20
 -25   5   6   19.70    4.70
 -25   5   6   10.30    9.90
 -23  -5   6    4.10    5.00
  23   5  -6   -6.30    7.10
 -23   5   6    2.20    9.10
 -23   5   6    4.20    3.70
 -21  -5   6   71.09   10.90
 -21   5   6   67.19    8.10
  21   5  -6   79.99    7.20
 -21   5   6   60.99   20.70
 -19  -5   6    3.40    4.40
 -19  -5   6    2.10    2.40
  19   5  -6    5.00    2.20
 -19   5   6    1.80    7.80
 -19   5   6    5.20    2.90
  19   5  -6   -0.60    6.40
 -17  -5   6    2.60    3.90
 -17   5   6   -1.00    2.30
 -15  -5   6    0.10    1.60
 -15  -5   6   -0.30    3.20
 -15   5   6    0.60    2.10
 -13  -5   6    6.40    3.20
 -13  -5   6    8.10    1.60
 -13   5   6    9.60    2.40
  13   5  -6    8.60    1.50
 -11  -5   6   87.49    8.30
 -11   5   6   97.59    6.90
 -11   5   6   95.49    6.80
  -9  -5   6  141.49    9.00
   9  -5  -6  112.89   21.60
  -9   5   6  113.39    7.70
  -9   5   6  126.19    7.70
  -7  -5   6   96.09    7.30
  -7   5   6   90.89    6.50
  -7   5   6   88.69    6.80
  -5  -5   6   17.00    2.90
  -5   5   6   19.10    3.00
  -5   5   6   19.20    2.60
   3  -5  -6   11.70   10.20
  -3  -5   6    2.70    2.20
   3   5  -6    3.50    4.40
  -1  -5   6    1.00    2.20
   1  -5  -6   14.40   10.60
  -1   5   6    5.20    2.60
   1   5  -6   13.50    6.20
   1  -5   6   31.40    5.10
   1   5   6   36.90    4.90
   1   5   6   42.00    6.80
   3  -5   6   48.80    5.30
   3   5   6   51.79    5.40
   3   5   6   56.89    7.30
  -3   5  -6   55.89    4.10
   5  -5   6   87.49    6.40
   5   5   6   96.09    6.90
   5   5   6  109.99    9.40
  -5   5  -6   92.89    5.90
   7  -5   6   -2.90    1.80
  -7   5  -6   -1.50    1.60
   7   5   6    3.10    3.10
  -7   5  -6   -7.20    8.90
   7   5   6   -0.90    2.20
   9   5   6  122.19   10.80
   9   5   6  100.99    7.70
  -9   5  -6   99.79    7.20
 -11  -5  -6   97.79    8.60
 -11   5  -6   93.59    7.70
  11   5   6   68.59    7.90
 -11   5  -6  108.09   33.50
  11   5   6  103.69   11.10
 -13  -5  -6   -1.00    2.90
  13   5   6   -0.70    4.00
 -13   5  -6    0.40    2.60
 -13   5  -6   -8.80   13.40
  13   5   6   -3.40    2.80
 -15  -5  -6   11.60    3.80
 -15   5  -6   12.40    3.60
  15   5   6   14.00    3.60
 -15   5  -6   -5.40   14.30
  15   5   6   10.10    4.90
 -17  -5  -6    8.00    3.70
  17   5   6    5.40    3.60
 -17   5  -6  -12.90   14.60
  17   5   6   -1.50    4.70
 -17   5  -6    0.60    3.40
 -19  -5  -6    5.40    3.90
  19  -5   6    7.30    4.00
 -19   5  -6   -2.00   15.70
  19   5   6   11.40    4.10
 -19   5  -6    3.70    3.90
  21  -5   6   -0.30    4.00
 -21  -5  -6    1.00    4.00
 -21   5  -6    0.00    4.20
 -21   5  -6   -5.30   15.90
  21   5   6    5.90    4.10
 -26   6   6   -8.40    3.80
 -26   6   6   -1.20    9.00
 -24  -6   6   88.49   12.50
  24   6  -6  102.59   16.30
 -24   6   6  100.39   24.40
 -24   6   6   80.39   10.10
 -22  -6   6  304.77   18.70
 -22   6   6  282.27   30.60
  22   6  -6  221.58   23.10
 -22   6   6  283.17   15.80
 -20  -6   6  296.87   18.70
  20   6  -6  235.08   24.10
 -20   6   6  316.37   16.10
 -20   6   6  328.07   30.90
 -18  -6   6  905.11   40.90
 -18   6   6  922.91   38.30
 -16  -6   6  379.06   20.60
 -16   6   6  361.76   17.60
 -14  -6   6  106.69   10.70
 -14   6   6  118.89    8.20
 -12  -6   6    7.50    3.60
 -12   6   6    8.60    2.80
 -12   6   6    8.10    2.60
 -10  -6   6   94.49    8.70
  10  -6  -6   70.49   21.90
 -10   6   6   89.49    7.10
 -10   6   6   94.19    7.10
  -8  -6   6  393.36   18.60
   8  -6  -6  362.56   32.00
  -8   6   6  379.26   17.20
  -8   6   6  376.46   17.70
  -6  -6   6  657.23   27.90
  -6   6   6  623.54   27.60
  -6   6   6  643.24   26.80
  -4  -6   6  799.12   32.40
   4  -6  -6  699.63   47.10
  -4   6   6  789.42   31.60
  -4   6   6  776.12   33.00
  -2  -6   6  190.98   11.20
  -2   6   6  208.38   10.70
  -2   6   6  209.98   12.40
   0  -6   6   55.89    6.30
   0  -6  -6   92.89   26.60
   0   6   6   60.59    6.10
   0   6   6   71.69    8.00
   2  -6   6  586.64   24.90
   2   6   6  573.94   24.60
  -2   6  -6  575.44   23.50
   2   6   6  607.54   27.90
   4  -6   6 1032.70   60.99
  -4  -6  -6  919.41   59.99
   4  -6   6 1108.99   43.70
   4   6   6 1141.09   47.60
  -4   6  -6 1204.58   61.69
   4   6   6 1096.39   43.70
  -4   6  -6 1136.29   43.00
   6  -6   6 1709.93   64.89
   6  -6   6 1489.25   84.09
  -6   6  -6 1793.52   64.89
  -6   6  -6 1480.85   81.99
   6   6   6 1696.33   65.19
   6   6   6 1773.12   69.59
   8   6   6  869.31   40.00
  -8   6  -6  867.91   35.50
   8   6   6  869.01   35.90
  10   6   6  503.45   22.70
  10   6   6  510.85   26.80
 -10   6  -6  502.75   22.50
 -12  -6  -6   -1.50   14.20
  12   6   6   12.80    5.30
 -12   6  -6   -9.50   12.20
 -12   6  -6   13.80    3.30
  12   6   6   15.30    3.60
  14   6   6    5.30    5.00
  14   6   6    6.60    3.30
 -14   6  -6    0.60   13.90
 -14   6  -6   11.10    3.40
 -16  -6  -6   21.00    5.00
 -16   6  -6   28.30    4.90
  16   6   6   21.70    4.30
  16   6   6   17.20    6.40
 -18  -6  -6  140.79   12.40
  18   6   6  174.48   11.90
  18   6   6  130.89   15.40
 -18   6  -6  162.68   12.60
 -20  -6  -6   37.80    6.20
 -20   6  -6   69.99   10.30
 -25  -7   6    2.80    8.10
 -25   7   6    7.10    4.20
 -25   7   6   15.10   10.40
  25   7  -6   10.50    9.00
 -23  -7   6  236.68   17.00
 -23   7   6  231.38   14.50
  23   7  -6  231.18   21.20
 -23   7   6  229.38   29.30
 -21  -7   6  435.96   23.70
 -21   7   6  420.06   20.60
  21   7  -6  381.76   28.50
 -19  -7   6  715.63   33.40
 -19   7   6  738.23   30.30
  19   7  -6  573.54   38.60
 -17  -7   6  876.61   40.20
 -17   7   6  888.51   37.30
 -15  -7   6  190.18   15.50
 -15   7   6  213.28   12.30
  15   7  -6  245.58   22.10
 -13  -7   6   -6.70    4.20
 -13   7   6    7.50    2.90
 -11  -7   6   -4.50    3.50
 -11   7   6    0.70    2.60
 -11   7   6    3.20    2.40
   9  -7  -6   79.49   25.70
  -9  -7   6   78.59    8.80
  -9   7   6   80.49    7.70
  -9   7   6   77.79    6.90
   7  -7  -6  697.43   49.60
  -7  -7   6  765.82   33.00
  -7   7   6  779.62   31.50
  -7   7   6  761.52   32.60
  -5  -7   6  418.06   19.90
   5  -7  -6  397.96   38.20
  -5   7   6  403.96   18.40
  -5   7   6  410.36   20.10
  -3  -7   6  239.18   13.10
  -3   7   6  232.28   14.20
  -3   7   6  231.88   12.00
  -1  -7   6    3.80    2.70
   1  -7  -6   -9.30   12.40
  -1   7   6    5.80    3.50
  -1   7   6    8.30    2.60
   1  -7   6  616.44   26.40
  -1  -7  -6  607.24   48.10
   1   7   6  610.14   29.60
   1   7   6  590.74   25.70
  -3  -7  -6  783.62   56.49
   3  -7   6  863.91   35.20
  -3   7  -6  876.51   33.80
   3   7   6  870.31   39.50
   3   7   6  827.02   34.70
   5  -7   6 2014.70  109.69
   5  -7   6 2390.66   89.89
   5   7   6 2310.07   89.59
  -5   7  -6 2456.85   89.19
   5   7   6 2343.57   94.99
   7   7   6 1343.07   59.19
  -7   7  -6 1366.16   53.29
   7   7   6 1315.27   53.49
   9   7   6 1803.82   72.99
   9   7   6 1844.12   78.89
  -9   7  -6 1916.51   73.29
 -11  -7  -6    0.70   14.40
 -11   7  -6   -6.60   12.00
  11   7   6   13.00    3.60
  11   7   6    6.10    5.80
 -11   7  -6   14.40    3.20
 -13  -7  -6   -4.80   14.90
 -13   7  -6    1.40   12.90
 -13   7  -6    7.70    3.40
  13   7   6    3.10    5.60
  13   7   6   10.70    3.60
  15   7   6   42.50    8.10
  17   7   6   97.19    9.90
 -17   7  -6  106.39   10.90
  17   7   6  107.59   15.10
 -19   7  -6   68.99   10.30
  19   7   6   41.90    8.70
 -24  -8   6   13.50    6.10
  24   8  -6   18.80    8.10
 -24   8   6   22.90    5.00
 -22  -8   6   47.90    7.70
 -22   8   6   70.39    8.80
  22   8  -6   57.79   10.70
 -20  -8   6  108.29   13.20
 -20   8   6  104.19    9.50
  20   8  -6  120.69   18.20
 -18  -8   6   60.09   11.40
 -18   8   6   60.59    8.10
  18   8  -6   60.49   11.50
 -16  -8   6   30.80    6.60
  16   8  -6   46.70   11.40
 -16   8   6   23.40    4.40
 -14  -8   6   86.09   12.70
 -14   8   6  103.69    9.10
 -12  -8   6    3.40    5.60
 -12   8   6   17.80    3.70
 -10  -8   6  970.40   43.10
 -10   8   6 1009.40   41.70
 -10   8   6  967.20   40.60
  -8  -8   6    7.20    4.00
   8  -8  -6    0.70   13.60
  -8   8   6    7.60    2.80
  -8   8   6    7.00    3.40
   6  -8  -6   -4.50   13.70
  -6  -8   6   12.70    3.90
  -6   8   6   12.80    3.10
  -6   8   6   15.00    4.10
  -4  -8   6    1.70    3.30
   4  -8  -6    5.40   14.10
  -4   8   6    2.70    3.50
  -4   8   6    4.60    2.80
  -2  -8   6  117.89    9.80
  -2   8   6  116.69    8.30
  -2   8   6   94.99   11.40
   0  -8  -6   -9.30   15.40
   0  -8   6    0.10    3.10
   0   8   6    0.90    4.10
   0   8   6    4.10    2.70
   2  -8   6  311.57   39.20
   2  -8   6  335.97   17.00
   2   8   6  323.07   21.00
   2   8   6  332.17   16.00
  -4  -8  -6  173.08   42.00
   4  -8   6  212.38   12.90
   4   8   6  219.58   17.60
   4   8   6  229.08   12.20
   6   8   6  117.79    9.10
   6   8   6  116.79   14.70
   8   8   6  452.75   27.70
   8   8   6  449.26   21.00
  -8   8  -6  474.75   25.20
 -10   8  -6  207.78   12.50
  10   8   6  209.78   12.20
  10   8   6  177.08   18.40
 -12   8  -6   52.09    7.70
  12   8   6   34.80    8.20
  14   8   6   15.10    7.20
  16   8   6   31.80    4.90
 -16   8  -6   32.80    5.40
  16   8   6   19.70    7.60
  18   8   6    0.10    6.80
 -18   8  -6    7.50    4.50
  18   8   6   17.10    4.30
 -23  -9   6   -8.30    5.10
  23   9  -6   -9.00    6.40
 -23   9   6   -2.00    3.50
 -21  -9   6   -1.10    5.50
  21   9  -6   -2.40    7.50
 -21   9   6    7.10    3.70
 -19  -9   6   22.50    6.60
  19   9  -6   16.30    8.40
 -19   9   6   24.70    4.40
 -17  -9   6   25.90    6.40
 -17   9   6   23.30    4.20
  17   9  -6   11.80    7.90
 -15  -9   6    1.80    4.90
  15   9  -6    1.90    7.70
 -15   9   6   -0.20    3.00
 -13  -9   6   46.70    7.40
  13   9  -6   26.60   10.20
 -13   9   6   51.99    7.70
 -11  -9   6  381.06   22.30
 -11   9   6  382.66   18.70
  -9  -9   6  315.87   19.50
  -9   9   6  307.37   16.10
  -9   9   6  310.17   18.10
  -7  -9   6 1761.82   71.39
  -7   9   6 1740.93   68.79
  -7   9   6 1690.93   71.49
  -5  -9   6 1025.40   43.00
  -5   9   6  933.21   43.80
  -5   9   6  977.30   40.50
  -3  -9   6  907.51   39.30
  -3   9   6  919.91   37.40
  -3   9   6  852.21   41.50
  -1  -9   6  153.48   12.10
  -1   9   6  138.49   10.20
  -1   9   6  128.99   14.50
   1  -9   6   -7.20   14.30
  -1  -9  -6  -10.00   18.10
   1  -9   6   16.00    4.60
   1   9   6   11.50    5.90
   3  -9   6    4.70    4.10
   3  -9   6   -9.50   14.50
   3   9   6    0.30    5.40
   3   9   6    7.50    3.30
   5   9   6  102.49   15.10
   5   9   6  126.09    9.40
  -7  -9  -6  -14.90   17.00
   7   9   6    0.90    5.50
   7   9   6    3.70    3.00
  -9  -9  -6  -13.90   17.80
   9   9   6   13.20    3.50
   9   9   6   10.40    6.60
  11   9   6   54.39    9.70
  13   9   6   32.70    8.90
  15   9   6   35.30    9.70
  17   9   6  317.47   17.30
  17   9   6  278.87   25.10
 -22 -10   6    9.50    6.10
  22  10  -6   15.40    7.90
 -22  10   6   14.40    4.30
 -20 -10   6  102.39   14.00
  20  10  -6  103.29   18.20
 -20  10   6  110.99   10.30
 -18 -10   6  201.58   17.00
 -18  10   6  198.78   12.80
  18  10  -6  138.49   20.90
 -16 -10   6  115.99   14.00
 -16  10   6  104.99    9.50
 -14 -10   6    3.60    5.10
  14  10  -6    5.90    7.80
 -14  10   6   -1.30    3.00
 -12 -10   6  130.89   13.60
 -12  10   6  125.29   10.00
 -10 -10   6  563.04   28.80
 -10  10   6  554.94   25.40
  -8 -10   6 1044.20   45.20
  -8  10   6 1078.49   45.50
   8  10  -6  826.82   50.09
  -8  10   6 1047.70   42.00
  -6 -10   6 1540.05   61.49
   6  10  -6 1194.58   65.79
  -6  10   6 1487.75   58.19
  -6  10   6 1529.05   62.59
   4 -10  -6  648.14   66.59
  -4 -10   6  844.62   36.90
  -4  10   6  822.02   33.90
  -4  10   6  823.22   38.90
  -2 -10   6  268.27   17.40
  -2  10   6  261.27   14.80
  -2  10   6  269.47   20.20
   0  10   6   28.30    7.50
  -2 -10  -6   20.80   20.30
   2 -10   6   20.00    5.10
   2 -10   6   25.20   17.90
   2  10   6   13.70    3.70
   2  10   6    8.60    6.60
  -4 -10  -6   29.00   21.50
   4 -10   6   38.80   21.20
   4  10   6   41.70    8.90
   6  10   6  295.87   23.90
   6  10   6  326.67   16.20
   8  10   6  231.68   21.80
   8  10   6  253.67   14.00
 -10 -10  -6  -18.80   21.50
  10  10   6    1.00    3.30
  10  10   6   -8.20    6.80
 -12 -10  -6    3.50   19.20
  12  10   6   22.90    9.30
 -19 -11   6   -0.40    5.80
 -19  11   6   -4.60    3.30
  19  11  -6    9.00    8.20
 -17 -11   6    7.60    6.50
 -17  11   6    8.90    4.00
  17  11  -6   12.20    9.10
 -15 -11   6   14.20    6.70
  15  11  -6    2.40    8.90
 -15  11   6    9.10    4.10
 -13 -11   6    0.20    5.80
 -13  11   6    2.10    3.50
  13  11  -6   -8.40    9.40
 -11 -11   6   24.90    6.70
 -11  11   6   22.00    4.30
  11  11  -6   38.20   11.10
  -9 -11   6  130.29   14.10
  -9  11   6  130.69   10.60
  -7 -11   6  345.97   21.10
   7 -11  -6  260.87   55.59
  -7  11   6  349.47   17.50
   7  11  -6  325.07   27.80
  -7  11   6  359.76   22.00
  -5 -11   6  295.07   19.40
   5  11  -6  225.08   24.70
  -5  11   6  315.47   21.10
  -5  11   6  313.87   16.00
  -3 -11   6  358.06   21.30
  -3  11   6  363.36   23.70
  -3  11   6  369.66   17.80
   3  11  -6  276.27   25.80
  -1 -11   6   18.90    6.00
   1 -11  -6   -5.70   20.10
  -1 -11   6    9.30   16.30
  -1  11   6   23.30    7.40
   1  11  -6    9.30    7.80
   1 -11   6   -3.80    4.60
   1 -11   6   -3.10   16.60
  -1 -11  -6   -1.20   19.30
   1  11   6   -5.90    3.00
   1  11   6   -8.10    5.50
  -1  11  -6    4.00    6.90
   3 -11   6   10.90   19.80
  -3 -11  -6   13.90   20.20
   3  11   6    4.30    3.50
   3  11   6  -10.10    5.80
  -5 -11  -6    8.10   20.20
   5  11   6    4.00    7.60
  -7 -11  -6   24.70   21.90
   7  11   6   23.60    4.40
   7  11   6    9.00    8.10
  -9 -11  -6    3.10   26.30
   9  11   6    8.80    3.90
   9  11   6   -8.60    7.00
 -11 -11  -6   -0.60   21.20
  11  11   6    4.90    9.00
 -13 -11  -6   13.60   21.00
  13  11   6   12.00    9.90
  13  11   6   15.50    4.50
 -16 -12   6   54.39    9.10
  16  12  -6   54.49   12.10
 -16  12   6   75.19    9.80
 -14 -12   6   12.40    6.90
 -14  12   6    9.00    4.60
  14  12  -6   18.70   10.90
 -12 -12   6    3.60    6.50
  12  12  -6   -3.90    9.10
 -12  12   6   -5.10    3.70
 -10 -12   6   12.80    6.50
 -10  12   6   -0.90    4.10
  10  12  -6    4.90    9.80
  -8 -12   6    8.80    5.90
  -8 -12   6  -11.00   15.70
  -8  12   6    4.20    4.10
   8  12  -6    6.20    8.70
  -6 -12   6   16.80    6.10
  -6 -12   6   -6.60   16.20
  -6  12   6    9.80    4.00
  -6  12   6   14.40    6.50
   6  12  -6    5.90    8.20
   4 -12  -6    4.90   20.80
  -4 -12   6   -1.20   16.90
   4  12  -6    9.50    8.30
   2 -12  -6    0.20   20.00
  -2 -12   6   13.10    5.90
  -2 -12   6   -8.70   16.90
  -2  12   6    9.70    6.70
   2  12  -6   -3.10    7.30
   0 -12   6   17.70    6.20
   0 -12   6   13.20   19.40
   0 -12  -6    1.70   20.00
   0  12   6   12.40    4.20
   0  12   6   16.70    7.50
   0  12  -6   17.40    8.40
  -2 -12  -6    8.40   22.20
   2  12   6   38.90    9.30
   4  12   6  267.07   15.10
   4  12   6  227.28   23.00
  -6 -12  -6   14.90   28.10
   6  12   6   59.49    9.20
   6  12   6   32.60   10.10
  -8 -12  -6   39.80   28.20
   8  12   6   24.70    9.90
   8  12   6   37.60    5.30
 -10 -12  -6   16.30   31.20
  10  12   6    8.00    4.30
  10  12   6    3.90    9.20
 -13 -13   6  -14.00   17.70
 -13 -13   6    2.00    6.90
  13  13  -6   -2.90    8.20
 -13  13   6    0.50    3.90
 -11 -13   6   44.20    8.20
  11  13  -6   40.60   11.30
 -11  13   6   32.10    5.40
   9  13  -6   53.09   11.40
  -7 -13   6  372.76   22.90
   7  13  -6  328.47   28.10
  -7  13   6  343.97   19.00
   5  13  -6   66.29   11.90
  -5  13   6   93.59   10.50
  -5  13   6   91.29   16.00
  -3 -13   6  161.98   15.00
  -3  13   6  126.39   11.50
  -3  13   6  114.39   17.30
   3  13  -6  134.79   19.10
  -1 -13   6   -0.40    5.20
  -1 -13   6  -18.10   20.50
   1 -13  -6   27.50   25.30
   1  13  -6    0.30    6.70
  -1 -13  -6   24.20   22.20
   1 -13   6   10.90   23.70
   1  13   6   10.80    4.60
   1  13   6    7.80    7.90
  -3 -13  -6   28.10   23.70
   3  13   6   28.10    5.10
   3  13   6   22.70    9.00
   5  13   6  342.17   18.20
   5  13   6  313.67   27.00
   6  14  -6  212.58   23.30
   4  14  -6  105.39   19.70
  -4  14   6  112.49   19.20
   2  14  -6   19.00    8.60
  -2  14   6    3.10    7.90
 -30   0   7    3.60    4.40
 -28   0   7    0.40    3.70
 -26   0   7    0.50    3.40
 -24   0   7   -0.50    2.80
 -22   0   7    0.00    2.40
 -20   0   7   -0.60    2.10
 -18   0   7    1.80    1.90
 -18   0   7    1.20    2.00
 -16   0   7   -0.90    1.60
 -16   0   7    1.50    1.80
 -14   0   7    1.30    1.70
 -14   0   7   -1.80    1.30
 -12   0   7   -6.40    6.10
 -12   0   7    3.60    1.80
 -10   0   7   -0.10    1.30
 -10   0   7   -0.30    2.40
 -10   0   7    0.60    1.70
  -8   0   7    0.00    1.10
  -8   0   7   -0.90    1.70
  -6   0   7   -1.40    1.70
  -6   0   7   -1.80    1.10
   6   0  -7    3.20    6.30
  -4   0   7    1.10    1.80
  -4   0   7    0.40    1.20
   4   0  -7    1.30    7.00
   2   0  -7   -5.20    8.10
  -2   0   7   -0.40    1.10
  -2   0   7    2.90    1.90
   0   0   7    1.10    1.80
   0   0   7    0.60    1.20
   0   0  -7   -0.30    9.10
   2   0   7    2.20    2.00
  -2   0  -7    1.00    1.20
  -2   0  -7    0.20   10.30
   2   0   7   -1.80    1.30
   4   0   7    4.30    2.20
   4   0   7    0.60    1.40
  -4   0  -7    3.00    1.50
  -4   0  -7   -2.90   11.70
   6   0   7    2.20    2.30
  -6   0  -7  -10.70   12.20
   6   0   7   -0.90    1.50
  -6   0  -7    0.10    1.40
   8   0   7   -0.50    1.80
   8   0   7   -0.80    2.50
  -8   0  -7   -0.20    1.80
  10   0   7   -2.20    2.10
  10   0   7   -3.30    2.80
 -10   0  -7    1.10    2.10
 -12   0  -7   -1.30    2.30
  12   0   7   -4.90    3.20
  12   0   7    0.70    2.50
 -14   0  -7    3.40    2.90
 -14   0  -7  -11.90   12.00
  14   0   7    6.30    3.10
  16   0   7   -1.00    3.40
 -16   0  -7   -1.30    3.40
  18   0   7   -8.30    3.80
 -18   0  -7  -13.50   13.50
 -20   0  -7   -7.40    3.70
 -20   0  -7   -8.10   14.30
  20   0   7   -6.80    4.10
 -22   0  -7   -1.90    4.30
 -22   0  -7  -12.20   15.40
  22   0   7   -3.50    4.40
 -29  -1   7    2.00    4.00
 -29   1   7    3.00    4.20
 -27  -1   7   15.30    4.20
 -27   1   7   16.80    4.30
 -25  -1   7  245.08   13.80
 -25   1   7  235.78   13.90
 -23  -1   7  489.75   22.20
 -23   1   7  485.15   22.30
 -21  -1   7  220.38   11.60
 -21   1   7  211.88   11.80
 -19  -1   7   14.70    3.00
 -19  -1   7    9.20    2.40
 -19   1   7   10.30    2.50
 -17  -1   7   33.10    4.80
 -17  -1   7   21.00    2.70
 -15  -1   7 1012.20   40.30
 -15  -1   7  988.60   39.60
 -15   1   7 1025.50   39.80
 -15   1   7  993.40   40.00
 -13  -1   7 1948.11   77.19
 -13  -1   7 2042.00   78.09
 -13   1   7 2046.20   77.69
 -13   1   7 2012.20   77.69
 -11  -1   7 2055.89   82.49
 -11  -1   7 2223.18   83.59
 -11   1   7 2210.08   83.29
 -11   1   7 2151.58   83.09
  -9  -1   7 1241.18   48.70
  -9  -1   7 1303.07   49.80
  -9   1   7 1258.77   49.30
  -9   1   7 1257.07   49.50
  -7  -1   7  387.46   16.10
  -7  -1   7  367.46   14.90
   7  -1  -7  326.67   24.60
  -7   1   7  385.76   16.10
  -7   1   7  373.76   15.50
  -5  -1   7   85.19    4.60
   5  -1  -7  115.79   18.30
  -5  -1   7   93.79    6.20
  -5   1   7   93.89    6.20
  -5   1   7   87.49    5.30
   5   1  -7   96.49   15.00
  -3  -1   7  122.99    7.20
  -3  -1   7  112.39    5.60
  -3   1   7  127.59    7.30
  -3   1   7  119.79    6.20
  -1  -1   7 1257.27   48.10
  -1  -1   7 1178.38   47.00
  -1   1   7 1198.88   47.40
  -1   1   7 1249.07   48.30
   1  -1   7 1525.75   61.79
  -1  -1  -7 1755.62   77.09
   1  -1   7 1496.25   60.89
  -1   1  -7 1697.03   74.29
   1   1   7 1534.05   62.09
  -1   1  -7 1569.74   61.29
   1   1   7 1534.25   61.29
  -3  -1  -7  571.74   23.80
   3  -1   7  574.34   23.10
   3  -1   7  571.54   23.90
   3   1   7  560.04   23.30
   3   1   7  573.54   24.40
  -3   1  -7  584.14   23.60
   5  -1   7  261.67   11.50
  -5  -1  -7  250.07   12.10
   5  -1   7  242.68   12.30
   5   1   7  247.18   12.80
  -5   1  -7  256.47   12.00
   5   1   7  253.27   11.70
  -7  -1  -7   19.00   13.30
   7  -1   7    2.90    2.40
  -7  -1  -7    1.90    1.70
   7  -1   7    6.40    1.80
   7   1   7   -0.30    1.70
  -7   1  -7    2.20    1.70
  -7   1  -7    1.70   12.60
   7   1   7    1.10    2.50
  -9  -1  -7  266.87   36.20
  -9  -1  -7  276.97   14.00
   9  -1   7  291.37   14.10
   9  -1   7  284.97   13.30
  -9   1  -7  287.97   13.90
   9   1   7  281.77   13.50
  -9   1  -7  247.68   35.10
   9   1   7  291.17   14.80
 -11  -1  -7  563.44   25.40
  11  -1   7  565.04   24.50
  11  -1   7  589.84   25.00
  11   1   7  566.74   24.80
  11   1   7  585.64   25.80
 -11   1  -7  563.34   25.20
  13  -1   7  934.11   38.70
 -13  -1  -7  915.31   39.60
 -13   1  -7  920.41   39.40
  13   1   7  939.11   38.90
  13   1   7  976.20   39.90
 -15  -1  -7  428.56   21.80
  15  -1   7  458.25   21.10
  15   1   7  460.65   21.30
 -15   1  -7  442.36   21.70
 -17  -1  -7  159.88   12.60
  17  -1   7  173.78   12.10
 -17   1  -7  175.28   12.60
  17   1   7  184.28   12.30
 -19  -1  -7   -1.90    3.70
 -19  -1  -7  -11.90   13.10
  19  -1   7   -2.80    3.80
 -19   1  -7    1.20    4.00
  19   1   7   -0.60    4.00
 -19   1  -7   -7.50   14.90
 -21  -1  -7   -2.90   13.70
  21  -1   7   -5.40    4.10
 -21  -1  -7    3.70    4.30
  21   1   7    4.10    4.30
 -21   1  -7   -2.20    4.10
 -21   1  -7   -4.10   16.20
 -30  -2   7   -2.30    3.90
  30   2  -7   -1.90    3.70
 -30   2   7   -3.50    4.30
 -30   2   7   -1.50   10.40
 -28  -2   7   -1.80    3.60
 -28   2   7    0.30    3.70
 -28   2   7    5.10    9.90
 -26  -2   7  311.97   16.40
 -26   2   7  300.67   16.80
 -24  -2   7  291.97   15.20
 -24   2   7  295.47   15.70
 -22  -2   7  301.97   15.20
 -22   2   7  319.87   27.90
 -22   2   7  304.67   15.70
 -20  -2   7   97.09    7.30
 -20  -2   7   97.09    8.90
 -20   2   7   94.89   18.20
 -20   2   7  100.39    7.80
 -18  -2   7   80.19    7.40
 -18  -2   7   72.79    5.90
 -18   2   7   62.89   16.50
 -18   2   7   87.99    6.60
 -16  -2   7  423.26   18.90
 -16  -2   7  414.56   17.60
 -16   2   7  410.06   18.30
 -14  -2   7 1391.76   53.49
 -14  -2   7 1310.17   52.19
 -14   2   7 1342.97   53.09
 -12  -2   7 3930.21  147.99
 -12  -2   7 3674.93  146.59
 -12   2   7 3832.72  147.59
 -12   2   7 4015.80  147.39
 -10  -2   7 2614.64  104.79
 -10  -2   7 2836.72  106.39
  10  -2  -7 2750.72  113.89
 -10   2   7 2821.32  105.89
 -10   2   7 2782.92  105.99
  -8  -2   7  982.00   38.60
  -8   2   7  960.20   38.40
  -8   2   7  953.60   38.10
   6  -2  -7   10.90    8.60
  -6  -2   7    9.00    2.10
  -6   2   7    8.70    1.80
  -6   2   7    8.60    2.20
   4  -2  -7  170.98   23.00
  -4  -2   7  157.98    8.30
  -4   2   7  150.48    7.80
  -4   2   7  153.28    8.60
  -2  -2   7  694.13   28.10
  -2  -2   7  749.92   29.50
  -2   2   7  712.93   28.90
  -2   2   7  746.53   29.90
   0  -2   7 1124.69   44.50
   0  -2   7 1185.18   45.70
   0   2   7 1156.28   46.10
   0   2   7 1144.29   45.20
   0   2  -7 1165.88   44.80
   2  -2   7  586.34   24.10
  -2  -2  -7  641.04   43.00
   2  -2   7  604.44   25.20
   2   2   7  603.84   25.90
  -2   2  -7  616.84   24.60
   2   2   7  595.04   24.80
  -4  -2  -7  246.78   31.30
   4  -2   7  275.47   12.70
   4  -2   7  261.67   11.60
   4   2   7  278.97   12.30
  -4   2  -7  280.77   12.20
   4   2   7  272.17   13.60
  -4   2  -7  208.78   29.80
   6  -2   7    4.00    2.40
  -6  -2  -7    0.20    1.60
   6   2   7    0.90    1.70
   6   2   7   -1.70    2.50
  -6   2  -7    3.60   12.50
  -8  -2  -7  147.19   31.30
   8  -2   7  149.99    9.40
   8  -2   7  169.18    8.50
  -8  -2  -7  145.59    9.20
  -8   2  -7  153.48    8.80
   8   2   7  139.59    8.80
   8   2   7  141.69   10.40
  -8   2  -7  173.58   32.90
  10  -2   7  378.86   17.10
  10  -2   7  354.06   16.30
 -10  -2  -7  338.97   17.30
 -10   2  -7  364.56   16.90
  10   2   7  360.56   18.10
  10   2   7  351.36   16.70
 -12  -2  -7  624.04   28.40
  12  -2   7  644.94   27.50
 -12   2  -7  642.74   28.10
  12   2   7  674.63   29.20
  12   2   7  632.84   27.80
 -14  -2  -7  981.30   42.50
  14  -2   7 1027.50   41.60
 -14   2  -7  959.60   42.10
  14   2   7 1022.80   41.90
  14   2   7 1051.39   43.20
  16  -2   7  961.00   40.00
 -16  -2  -7  939.11   41.00
 -16   2  -7  928.11   40.70
  16   2   7  982.70   40.20
  18  -2   7   78.19    9.50
 -18  -2  -7   74.99    9.60
  18   2   7   85.39    9.50
 -18   2  -7   70.79    9.60
  20  -2   7    0.10    4.00
 -20  -2  -7   -6.00   12.50
 -20  -2  -7   -0.10    4.00
 -20   2  -7   -5.00    3.50
 -20   2  -7   -8.70   15.60
  20   2   7   -0.80    3.80
 -22  -2  -7   73.29   10.80
  22  -2   7   47.80    6.60
  22   2   7   73.29   10.70
 -22   2  -7   42.70    6.70
 -29  -3   7   -9.10    4.70
  29   3  -7   -8.30    3.50
 -29   3   7    0.40    8.80
 -29   3   7    0.50    4.00
 -27  -3   7   25.70    4.80
  27   3  -7   29.30    4.40
 -27   3   7   22.90    9.60
 -25  -3   7   12.00    3.70
 -25   3   7   12.70    8.30
 -25   3   7   13.80    4.00
 -23  -3   7   -5.10    2.60
 -23   3   7    0.90    6.90
 -23   3   7   -0.30    2.90
 -21  -3   7    7.80    4.20
 -21  -3   7   10.80    2.90
 -21   3   7    2.40    7.70
 -21   3   7    6.50    3.00
 -19  -3   7   80.49    6.40
 -19  -3   7   59.19    8.70
 -19   3   7   64.89    7.00
 -17  -3   7  167.18   11.10
 -17  -3   7  183.58    9.00
 -17   3   7  166.88    9.90
 -15  -3   7  430.96   19.60
 -15  -3   7  407.76   17.50
 -15   3   7  431.26   18.80
 -13  -3   7  599.74   24.90
 -13  -3   7  630.04   26.80
 -13   3   7  651.93   25.70
 -13   3   7  637.64   26.30
 -11  -3   7  902.41   36.10
  11  -3  -7  831.82   44.40
 -11   3   7  892.01   35.30
 -11   3   7  901.11   35.60
  -9  -3   7   62.99    5.60
  -9   3   7   52.79    5.40
  -9   3   7   58.89    5.20
  -7  -3   7   34.10    4.60
  -7   3   7   25.00    4.80
  -7   3   7   31.00    4.20
  -5  -3   7   31.90    4.60
  -5   3   7   39.70    4.20
  -5   3   7   28.30    4.80
  -3  -3   7  490.65   20.60
  -3   3   7  487.35   21.00
  -3   3   7  474.65   20.10
   1  -3   7  162.08    7.70
   1  -3   7  165.18    9.10
  -1   3  -7  185.28    8.10
   1   3   7  168.28   10.10
   1   3   7  179.78    9.00
   3  -3   7  358.96   15.60
   3  -3   7  388.66   16.70
   3   3   7  371.56   18.00
   3   3   7  386.36   16.70
  -3   3  -7  381.46   16.00
   5  -3   7   43.60    5.40
   5  -3   7   42.60    4.20
   5   3   7   34.10    6.60
   5   3   7   39.80    5.00
  -5   3  -7   47.30    4.40
  -9  -3  -7  101.49    8.20
   9  -3   7  102.19    7.30
   9  -3   7  106.19    8.00
  -9   3  -7  115.29   31.80
   9   3   7  111.89    7.90
   9   3   7  119.79    9.80
  -9   3  -7  107.39    7.60
 -11  -3  -7  161.28   10.80
  11  -3   7  163.58   10.00
  11   3   7  180.48   12.40
 -11   3  -7  172.08   10.40
  11   3   7  179.38   10.50
 -13  -3  -7  418.16   20.80
  13  -3   7  437.36   19.80
  13   3   7  444.36   20.30
  13   3   7  433.96   22.00
 -13   3  -7  409.36   20.20
 -15  -3  -7  121.39   10.10
  15  -3   7  115.39    9.40
 -15   3  -7  108.59    9.60
  15   3   7  103.69   11.20
  15   3   7  121.89    9.80
  17  -3   7   50.79    8.00
 -17  -3  -7   34.40    5.30
  17   3   7   36.80    5.20
 -17   3  -7   32.80    5.10
  19  -3   7    1.90    3.70
 -19  -3  -7   -2.00    3.80
 -19  -3  -7   -5.40   12.70
  19   3   7    0.60    4.20
 -19   3  -7   -0.30    3.70
 -19   3  -7  -15.80   15.50
 -21  -3  -7   -5.50   13.00
 -21  -3  -7   -0.70    4.20
  21  -3   7    2.70    4.20
  21   3   7   -0.80    4.40
 -21   3  -7  -10.60   16.70
 -21   3  -7    1.50    4.30
 -28   4   7   25.70   10.60
 -26   4   7  443.36   37.00
 -26   4   7  570.14   24.80
 -24   4   7  167.08   25.50
 -24   4   7  226.38   13.10
  24   4  -7  209.68   12.00
 -22  -4   7  577.84   24.40
 -22  -4   7  538.85   26.90
 -22   4   7  568.34   25.10
 -22   4   7  470.75   37.30
  22   4  -7  593.84   23.60
 -20  -4   7  199.48   14.10
 -20  -4   7  218.08   11.00
  20   4  -7  222.48   10.40
 -20   4   7  206.58   11.90
 -20   4   7  165.88   24.60
 -18  -4   7  155.28   12.20
 -18  -4   7  181.78    9.20
 -18   4   7  160.88   10.50
  18   4  -7  183.98    8.80
 -16  -4   7    3.80    1.60
 -16  -4   7   -0.50    3.10
 -16   4   7    1.20    2.20
  16   4  -7    3.00    1.60
 -14  -4   7   48.70    3.80
 -14  -4   7   34.00    6.60
 -14   4   7   49.00    5.50
  14   4  -7   42.70    3.50
 -12  -4   7   31.00    5.90
 -12   4   7   38.80    4.90
 -12   4   7   40.30    5.10
 -10  -4   7 1417.26   56.89
 -10   4   7 1427.76   56.39
 -10   4   7 1448.96   56.39
  -8  -4   7  320.07   15.10
   8  -4  -7  341.17   28.30
  -8   4   7  312.77   14.80
  -8   4   7  307.77   14.50
  -6  -4   7   89.79    6.80
  -6   4   7   84.29    6.80
  -6   4   7   91.29    6.30
  -4  -4   7  681.53   27.50
  -4   4   7  653.53   27.90
  -4   4   7  647.54   27.10
  -2  -4   7  141.39    8.20
  -2   4   7  139.79    8.10
  -2   4   7  143.29    9.20
   0  -4   7 2523.05   94.89
   0  -4  -7 2275.57  109.19
   0   4   7 2496.95   94.79
   0   4   7 2539.85   96.29
   2  -4   7 1728.23   67.69
   2  -4   7 1765.12   68.79
  -2   4  -7 1596.14   83.19
   2   4   7 1806.22   70.59
  -2   4  -7 1861.71   68.19
   2   4   7 1852.01   68.99
   4  -4   7 1294.67   51.99
   4  -4   7 1308.87   52.69
  -4   4  -7 1386.66   52.59
   4   4   7 1348.17   54.89
   4   4   7 1381.76   53.09
   6  -4   7  539.45   23.20
   6  -4   7  560.94   23.70
   6   4   7  575.44   24.10
  -6   4  -7  569.24   23.80
   6   4   7  598.44   26.40
   8  -4   7   18.10    2.70
   8  -4   7   17.80    2.80
   8   4   7   25.40    4.50
  -8   4  -7   17.80    2.90
  -8   4  -7    8.30   11.00
   8   4   7   18.60    3.00
 -10  -4  -7  430.36   20.30
  10  -4   7  416.16   19.00
  10   4   7  424.56   19.50
 -10   4  -7  432.46   19.60
  10   4   7  444.86   22.00
  12  -4   7   25.60    3.70
 -12  -4  -7   30.30    4.30
  12   4   7   32.00    5.60
  12   4   7   43.80    6.90
 -12   4  -7   29.30    4.10
  14  -4   7  136.99    9.70
 -14  -4  -7  144.09   10.70
  14   4   7  135.49   12.40
 -14   4  -7  136.99   10.10
  14   4   7  136.19   10.30
  16  -4   7   23.50    4.20
 -16  -4  -7   23.10    4.50
  16   4   7   23.50    4.50
  16   4   7   16.80    5.40
 -16   4  -7   19.80    4.20
 -18  -4  -7   13.70    4.60
  18  -4   7   19.70    4.30
 -18   4  -7   15.30    4.30
  18   4   7   11.30    4.30
 -18   4  -7   -2.00   16.20
 -20  -4  -7    9.10    4.50
  20  -4   7    8.20    4.30
 -20  -4  -7   -6.80   12.60
 -20   4  -7  -11.40   17.00
 -20   4  -7   11.70    4.70
  20   4   7   13.50    4.80
 -27   5   7  251.07   31.30
 -27   5   7  340.77   17.80
 -25   5   7  613.64   26.70
 -25   5   7  509.95   41.00
 -23  -5   7  813.22   36.50
 -23   5   7  879.61   34.70
 -23   5   7  788.72   49.30
  23   5  -7  646.64   41.30
 -21  -5   7  553.84   27.80
 -21   5   7  556.74   39.40
 -21   5   7  577.04   25.50
 -19  -5   7  202.18   14.80
 -19   5   7  223.18   12.50
 -17  -5   7   -1.30    3.50
 -17   5   7   -1.90    2.30
 -15  -5   7   80.59    9.20
 -15   5   7   88.19    7.10
 -13  -5   7  388.26   19.30
 -13   5   7  382.76   17.90
 -13   5   7  401.66   17.60
 -11  -5   7 1015.20   42.60
 -11   5   7 1060.09   41.60
 -11   5   7 1013.90   41.70
  -9  -5   7 1127.49   45.40
  -9   5   7 1096.39   44.60
  -9   5   7 1114.49   44.80
   7  -5  -7  148.59   24.00
  -7  -5   7  173.68    9.80
  -7   5   7  159.28    9.60
  -7   5   7  166.68    9.20
  -5  -5   7   84.39    6.90
  -5   5   7   77.99    7.00
  -5   5   7   80.69    6.30
  -3  -5   7 2163.48   81.89
  -3   5   7 2106.39   81.39
   3   5  -7 2049.40   90.09
  -3   5   7 2079.59   82.69
  -1  -5   7 2666.43  103.39
  -1   5   7 2615.64  104.69
  -1   5   7 2649.33  103.19
   1   5  -7 2779.72  115.49
   1  -5   7 2085.79   81.29
   1   5   7 2090.89   83.29
  -1   5  -7 2056.79   94.89
  -1   5  -7 2166.08   80.09
   1   5   7 2065.69   81.19
   3  -5   7 1074.19   45.30
   3   5   7 1132.89   45.60
   3   5   7 1156.58   48.00
  -3   5  -7 1160.08   44.80
  -3   5  -7 1192.98   61.79
   5  -5   7  296.97   32.50
   5  -5   7  335.17   15.70
   5   5   7  360.86   16.20
   5   5   7  378.36   19.00
  -5   5  -7  367.56   15.50
   7  -5   7   86.59    6.60
   7   5   7  104.39    7.60
   7   5   7  102.19   10.10
  -7   5  -7   91.99    6.70
   9   5   7   66.59    7.30
   9   5   7   91.39   10.40
  -9   5  -7   84.59    6.90
  -9   5  -7  101.99   31.90
 -11  -5  -7  -11.50   13.50
  11   5   7   16.30    4.90
 -11   5  -7    4.10   14.30
  11   5   7   12.00    3.60
  13  -5   7  690.63   29.20
 -13  -5  -7  661.63   30.40
 -13   5  -7  690.03   29.90
  13   5   7  676.43   32.70
  13   5   7  686.03   29.70
  15  -5   7  292.27   15.10
 -15  -5  -7  261.07   16.00
  15   5   7  284.37   15.60
  15   5   7  276.87   18.60
 -15   5  -7  285.67   15.90
  17  -5   7  157.68   11.70
 -17  -5  -7  150.28   12.60
  17   5   7  177.38   12.20
 -17   5  -7  161.68   12.30
  17   5   7  144.79   15.10
 -19  -5  -7    0.90    4.00
  19  -5   7    0.40    3.80
 -19   5  -7   -5.00   16.70
  19   5   7   -0.10    3.90
 -19   5  -7    1.40    3.80
 -26   6   7  185.58   13.20
 -26   6   7  155.48   27.40
 -24  -6   7  183.08   14.60
  24   6  -7  138.29   18.40
 -24   6   7  156.98   12.10
 -22  -6   7  328.97   19.50
 -22   6   7  318.47   16.80
  22   6  -7  248.88   25.00
 -20  -6   7  180.78   14.60
  20   6  -7  146.79   20.90
 -20   6   7  173.78   11.50
 -18  -6   7    4.00    4.80
 -18   6   7    5.30    3.00
 -16  -6   7   14.30    4.90
 -16   6   7   20.60    3.40
 -14  -6   7   86.79   10.20
 -14   6   7  121.19    8.20
 -12  -6   7   18.80    4.40
 -12   6   7   24.30    3.60
  10  -6  -7  223.08   28.60
 -10  -6   7  206.98   12.90
 -10   6   7  223.88   12.10
 -10   6   7  219.38   11.70
  -8  -6   7    4.10    3.00
   8  -6  -7   19.50   11.60
  -8   6   7    7.50    2.60
  -8   6   7    7.20    2.50
   6  -6  -7  173.78   27.80
  -6  -6   7  168.18   10.40
  -6   6   7  162.68    9.60
  -6   6   7  162.38   10.50
  -4  -6   7   10.10    2.80
   4  -6  -7    6.70   11.80
  -4   6   7    8.00    2.50
  -4   6   7    9.50    3.00
  -2  -6   7  679.93   28.60
  -2   6   7  671.73   28.20
  -2   6   7  675.83   30.20
   0  -6   7  471.95   21.20
   0  -6  -7  518.35   41.20
   0   6   7  478.15   23.40
   0   6   7  462.95   20.90
   2  -6   7  899.21   36.90
   2   6   7  886.71   36.80
   2   6   7  931.11   40.00
  -2   6  -7  905.81   35.70
   4  -6   7 1346.77   54.89
   4   6   7 1377.96   55.09
  -4   6  -7 1413.36   54.29
   4   6   7 1419.76   58.79
   6  -6   7   28.90    5.10
  -6  -6  -7   -0.40   14.20
   6   6   7   16.80    5.30
   6   6   7   18.40    3.30
  -6   6  -7   18.90    2.70
   8   6   7  163.38   14.20
   8   6   7  130.79   10.00
  -8   6  -7  157.18    9.20
  10   6   7  513.05   27.50
  10   6   7  488.55   23.30
 -10   6  -7  544.55   23.30
 -12  -6  -7   -3.50   12.80
  12   6   7    1.90    3.30
  12   6   7    5.20    4.90
 -12   6  -7  -10.10   12.70
 -12   6  -7    4.70    3.10
  16  -6   7   -0.80    3.60
  16   6   7    4.00    3.70
 -16   6  -7    0.50   15.50
  16   6   7   -1.40    5.20
 -16   6  -7    0.10    3.60
  18  -6   7   -1.20    3.80
 -18  -6  -7   -8.10   12.70
  18   6   7   -7.10    5.30
  18   6   7    5.30    4.00
 -18   6  -7    2.90   16.10
 -18   6  -7    2.60    4.10
 -25  -7   7    3.30    5.10
 -25   7   7   -0.40    3.80
  25   7  -7    6.70    6.50
 -23  -7   7   33.00    6.40
  23   7  -7   30.10    9.00
 -23   7   7   27.40    4.90
 -21  -7   7    9.00    5.20
  21   7  -7   -4.90    7.80
 -21   7   7   -5.20    3.30
 -19  -7   7   -2.60    5.00
 -19   7   7   -3.70    3.30
  19   7  -7   -3.60    8.70
 -17  -7   7   -0.30    5.10
 -17   7   7    1.10    3.30
 -15   7   7  317.97   16.40
 -13  -7   7  509.35   25.90
 -13   7   7  523.95   23.50
 -11  -7   7  117.19   11.00
 -11   7   7  133.79    9.70
 -11   7   7  136.59    9.20
  -9  -7   7  128.09   10.80
  -9   7   7  136.79    9.00
  -9   7   7  142.99    9.90
  -7  -7   7   99.79    9.40
  -7   7   7  117.09    9.30
  -7   7   7  121.29    8.40
  -5  -7   7   15.80    3.60
  -5   7   7   23.30    4.10
  -5   7   7   22.30    3.30
  -3  -7   7    6.10    3.00
   3  -7  -7   -7.10   12.10
  -3   7   7    5.30    3.30
  -3   7   7    6.60    2.70
   1  -7  -7   -5.40   12.50
  -1  -7   7   11.30    3.10
  -1   7   7   13.40    3.00
  -1   7   7   12.60    4.00
   1  -7   7   56.19    6.90
   1   7   7   69.19    9.70
   1   7   7   66.19    7.00
   3  -7   7   47.20    6.70
   3   7   7   55.59   10.00
   3   7   7   61.49    6.90
   5  -7   7  130.59    9.40
   5   7   7  126.59   13.80
  -5   7  -7  135.89   10.90
   5   7   7  143.99    9.50
   7   7   7  230.48   18.00
  -7   7  -7  231.38   12.10
   7   7   7  217.38   13.00
  -9  -7  -7   35.40   17.80
   9   7   7   10.70    6.30
  -9   7  -7   16.10    3.40
   9   7   7   16.90    3.80
  11   7   7  637.84   28.40
  11   7   7  623.34   33.70
 -11   7  -7  670.33   28.60
  13   7   7  245.78   20.00
 -13   7  -7  275.67   15.50
  13   7   7  267.07   14.90
 -15  -7  -7   -2.20   13.80
  15   7   7   29.90    7.70
 -15   7  -7   14.10   16.60
  17   7   7   32.30    5.10
 -17   7  -7    7.70   18.80
  17   7   7   19.90    7.00
 -17   7  -7   27.10    5.50
 -24  -8   7  337.57   21.50
 -24   8   7  357.26   18.80
  24   8  -7  292.67   25.70
 -22  -8   7  197.88   16.50
  22   8  -7  155.78   20.80
 -22   8   7  198.68   13.10
 -20  -8   7  127.99   13.90
 -20   8   7  134.69   10.60
  20   8  -7  110.39   19.80
 -18  -8   7   -2.90    5.00
  18   8  -7  -11.00    7.60
 -18   8   7   -2.60    3.10
 -16  -8   7  165.28   15.00
  16   8  -7  107.69   20.60
 -16   8   7  172.28   11.40
 -14  -8   7  531.95   27.50
 -14   8   7  522.75   24.30
 -12  -8   7 1972.40   80.79
 -12   8   7 1984.70   78.39
 -10  -8   7  457.55   23.80
 -10   8   7  478.35   22.90
 -10   8   7  459.35   21.60
  -8  -8   7  294.17   17.10
  -8   8   7  299.17   15.30
  -8   8   7  298.57   16.80
  -6  -8   7    9.00    3.90
   6  -8  -7   -7.80   13.50
  -6   8   7    8.80    3.80
  -6   8   7   10.50    3.10
  -4  -8   7  246.88   14.40
  -4   8   7  230.78   15.70
  -4   8   7  240.88   13.00
  -2  -8   7  322.27   16.90
  -2   8   7  313.17   19.30
  -2   8   7  321.97   15.90
   0  -8   7  797.62   33.50
   0   8   7  759.92   32.60
   0   8   7  764.42   36.90
   2  -8   7  423.96   20.30
   2   8   7  413.46   19.60
   2   8   7  425.86   24.70
   4  -8   7  144.29   11.00
   4  -8   7  108.99   37.00
   4   8   7  170.88   10.90
   4   8   7  189.48   16.30
  -6  -8  -7  -13.40   17.40
   6   8   7   -5.30    2.90
   6   8   7    2.50    5.30
  -8  -8  -7  -12.50   16.80
   8   8   7    2.40    3.10
   8   8   7   -3.10    5.20
 -10  -8  -7   12.50   17.80
  10   8   7   29.00    7.60
  12   8   7  573.44   33.40
  12   8   7  586.74   26.30
  14   8   7  536.45   32.80
  14   8   7  587.04   26.20
  16   8   7  274.57   23.50
  16   8   7  326.47   17.50
 -23  -9   7   74.39   13.40
 -23   9   7   96.89   10.00
  23   9  -7   62.89   11.50
 -21  -9   7  151.58   15.90
  21   9  -7  157.48   21.50
 -21   9   7  171.58   12.00
 -19  -9   7   18.90    6.30
  19   9  -7   31.90   10.30
 -19   9   7   33.30    4.70
 -17  -9   7   -6.50    5.00
  17   9  -7   -1.00    8.00
 -17   9   7   -2.20    3.00
 -15  -9   7   12.10    5.50
 -15   9   7   14.20    3.70
  15   9  -7    9.20    8.90
 -13  -9   7  368.16   22.00
  13   9  -7  375.66   29.10
 -13   9   7  367.16   18.70
 -11  -9   7  713.83   34.60
 -11   9   7  738.33   31.80
  -9  -9   7  278.97   18.10
  -9   9   7  277.47   15.20
  -9   9   7  282.97   17.50
  -7  -9   7    9.10    5.00
   7  -9  -7    6.50   17.00
  -7   9   7    5.30    3.50
  -7   9   7   -0.80    4.50
  -5  -9   7   12.30    4.90
   5  -9  -7   36.90   19.40
  -5   9   7   12.60    5.40
  -5   9   7    9.10    3.70
  -3  -9   7   27.60    5.40
  -3   9   7   18.70    4.00
  -3   9   7   21.20    6.00
  -1  -9   7  413.26   20.50
   1  -9  -7  341.57   51.19
  -1   9   7  389.86   18.80
  -1   9   7  366.46   23.40
   1  -9   7  467.45   22.80
   1   9   7  472.15   21.60
   1   9   7  438.16   26.90
   3  -9   7  431.06   20.80
   3   9   7  397.76   25.70
   3   9   7  387.96   19.40
   5   9   7   54.49    9.40
   5   9   7   74.99    8.30
  -7  -9  -7  -16.00   19.50
   7   9   7    7.30    6.00
   7   9   7   -1.80    3.00
   9   9   7  138.09   17.30
   9   9   7  142.19   10.50
  11   9   7  169.08   11.50
  11   9   7  140.59   18.40
  13   9   7   61.39   10.80
  15   9   7  225.08   14.10
  15   9   7  192.38   21.90
 -22 -10   7   -9.80    5.40
  22  10  -7   -0.10    7.40
 -22  10   7   -0.70    3.60
 -20 -10   7   -3.30    5.50
 -20  10   7    3.80    3.70
  20  10  -7    7.20    8.50
 -18 -10   7   -0.30    5.90
  18  10  -7   -1.30    8.10
 -18  10   7    2.90    3.50
 -16 -10   7    7.90    6.10
  16  10  -7   18.80    9.90
 -16  10   7   10.30    3.70
 -14 -10   7   81.79   12.20
 -14  10   7   76.99    8.70
 -12 -10   7   26.60    6.30
 -12  10   7   21.10    4.20
  12  10  -7    5.40    8.80
 -10 -10   7   19.30    5.70
 -10  10   7   23.60    4.40
  10  10  -7    5.50    8.80
  -8 -10   7   -3.70    4.90
  -8  10   7   -2.10    3.30
  -6 -10   7   22.10    6.50
   6 -10  -7   19.70   21.70
  -6  10   7   27.00    4.60
  -6  10   7   24.10    6.60
  -4 -10   7   -4.60    5.00
   4 -10  -7    5.60   21.20
  -4  10   7   -5.60    4.80
  -4  10   7   -0.60    3.50
  -2 -10   7    2.50   14.60
   2 -10  -7   -5.40   21.20
  -2 -10   7   -2.60    4.90
  -2  10   7   -0.90    5.40
  -2  10   7   -1.40    3.40
   0 -10   7    5.70    5.00
   0 -10  -7   21.10   22.30
   0  10   7    0.10    5.70
   0  10   7    8.00    3.80
   2 -10   7   16.20    4.90
   2 -10   7   -4.70   15.50
  -2 -10  -7   -8.30   20.10
   2  10   7    5.40    6.50
   2  10   7    8.00    3.70
  -4 -10  -7  -13.70   20.20
   4  10   7   -3.10    3.20
   4  10   7   -9.90    5.40
  -6 -10  -7  -14.70   21.50
   6  10   7   -8.90    5.80
   6  10   7   -1.70    3.20
  -8 -10  -7  -13.80   20.00
   8  10   7    0.30    3.40
 -10 -10  -7  -11.20   23.10
  10  10   7    5.30    7.60
 -12 -10  -7   -5.00   18.80
  12  10   7    6.10    8.50
 -14 -10  -7  -10.40   18.10
  14  10   7  -12.80    7.30
  14  10   7    3.60    4.00
 -19 -11   7   -5.40    5.50
 -19  11   7   -2.90    3.40
  19  11  -7    8.10    8.40
 -17 -11   7  132.59   15.40
 -17  11   7  110.89   10.60
 -15 -11   7  245.08   18.50
 -15  11   7  217.58   14.00
  15  11  -7  157.48   24.20
 -13 -11   7  739.53   36.50
 -13  11   7  730.33   32.70
 -11 -11   7  413.76   24.10
 -11  11   7  396.46   20.40
  -9 -11   7  349.87   21.70
  -9  11   7  351.56   18.40
  -7 -11   7   40.30    7.10
  -7  11   7   30.00    7.20
   7  11  -7   12.50    9.30
  -7  11   7   61.69    8.50
  -5 -11   7   -2.00    5.30
   5 -11  -7  -15.00   21.20
  -5  11   7   -0.20    5.40
   5  11  -7    6.70    8.30
  -5  11   7    3.60    3.60
   3 -11  -7   15.80   24.00
  -3 -11   7   31.00   16.70
   3  11  -7   52.79   10.50
  -1 -11   7   33.60   17.70
  -1 -11   7   46.30    7.40
  -1  11   7   48.20    9.00
  -1  11   7   70.29    8.80
   1 -11   7  319.67   18.90
   1  11   7  289.37   15.80
   1  11   7  240.08   22.30
  -3 -11  -7    4.50   24.70
   3  11   7   31.30    8.70
  -5 -11  -7    3.30   23.30
   5  11   7   28.40    9.30
  -7 -11  -7   -5.70   21.80
   7  11   7   -5.50    3.40
  -9 -11  -7    1.00   28.10
   9  11   7    9.10    4.10
   9  11   7   -6.20    7.70
  11  11   7  129.29   22.00
  11  11   7  183.98   12.60
 -16 -12   7  141.89   16.60
 -16  12   7  136.89   11.80
  16  12  -7  140.29   23.30
 -14 -12   7  273.17   20.40
  14  12  -7  224.48   26.90
 -14  12   7  251.97   15.70
 -12 -12   7  618.24   31.30
 -12  12   7  577.64   27.00
  12  12  -7  479.05   37.60
 -10 -12   7  406.46   24.60
 -10  12   7  399.16   20.90
  -8 -12   7  282.27   19.30
   8  12  -7  189.28   25.30
  -8  12   7  259.57   15.60
  -6 -12   7   16.80    6.10
  -6 -12   7    4.40   17.00
  -6  12   7    8.70    4.30
   6  12  -7   15.10    9.50
  -6  12   7    8.50    6.70
  -4 -12   7   24.00    6.50
   4 -12  -7   -0.50   21.90
  -4 -12   7    3.20   16.80
  -4  12   7   11.70    4.50
   4  12  -7    8.10    8.70
  -4  12   7    8.40    6.70
  -2 -12   7   13.70   18.70
   2 -12  -7    8.50   23.30
  -2 -12   7   37.30    7.00
  -2  12   7   28.80    4.90
  -2  12   7   27.90    8.30
   2  12  -7   40.00   10.40
   0 -12   7  174.48   15.10
   0  12   7  158.28   11.70
   0  12   7  130.69   18.30
   0  12  -7  117.49   19.90
   2  12   7   74.39   12.10
  -4 -12  -7   19.00   29.80
   4  12   7   24.30    9.20
  -6 -12  -7   17.00   30.80
  -8 -12  -7   28.30   31.70
   8  12   7   -6.80    8.20
   8  12   7   11.00    4.40
  13  13  -7   21.10   10.10
 -11 -13   7   74.89   14.20
 -11  13   7   60.89    9.80
  11  13  -7   61.89   12.70
  -9 -13   7  -18.50   18.60
  -9 -13   7    1.60    6.10
  -9  13   7   -3.60    4.10
   9  13  -7    7.60    8.80
  -7 -13   7    5.20   19.70
  -7 -13   7   49.30    8.10
  -7  13   7   29.40    5.40
   7  13  -7   42.60   11.40
  -5 -13   7  -13.00   19.30
  -5 -13   7    3.30    5.70
  -5  13   7   -7.60    3.80
  -5  13   7  -11.60    6.50
   5  13  -7    1.00    8.50
   3 -13  -7   17.10   23.70
  -3  13   7   21.00    4.90
   3  13  -7    8.20    8.70
  -3  13   7   28.70    9.00
  -1 -13   7   -8.30   20.40
  -1 -13   7    6.70    5.70
   1 -13  -7   10.10   23.50
  -1  13   7   -2.10    4.00
  -1  13   7  -11.50    6.80
   1  13  -7    5.10    8.00
  -1 -13  -7   10.60   23.80
   1  13   7   -7.50    3.80
  -3 -13  -7   13.70   32.10
 -30   0   8  723.63   32.90
 -28   0   8 1021.10   43.30
 -26   0   8  545.95   25.00
 -24   0   8  288.07   15.10
 -22   0   8    3.60    2.70
 -20   0   8   -0.10    2.00
 -18   0   8  337.47   15.00
 -18   0   8  319.67   15.10
 -16   0   8    1.90    1.90
 -16   0   8    1.20    1.60
 -14   0   8  507.85   21.00
 -14   0   8  472.35   20.30
 -12   0   8  162.08    8.80
 -12   0   8  155.88    7.90
 -10   0   8  916.51   36.70
 -10   0   8  952.90   37.50
  -8   0   8 3617.24  135.49
  -8   0   8 3459.95  134.59
  -6   0   8 5245.98  193.78
   6   0  -8 5026.50  201.98
  -6   0   8 4978.10  192.78
  -4   0   8 5506.85  203.08
  -4   0   8 5105.09  201.98
   4   0  -8 5374.16  213.48
  -2   0   8 4616.14  170.08
  -2   0   8 4496.25  168.98
   2   0  -8 4242.38  181.88
   0   0  -8 3533.05  154.68
   0   0   8 3745.03  140.59
   0   0   8 3724.73  139.69
   2   0   8  626.84   25.30
  -2   0  -8  635.34   25.80
   2   0   8  615.74   26.30
   4   0   8   77.79    5.60
   4   0   8   88.89    7.20
  -4   0  -8   57.39   15.90
  -4   0  -8   92.19    6.00
   6   0   8  998.60   40.80
  -6   0  -8 1020.90   40.70
   6   0   8  985.30   39.90
   8   0   8  153.18   10.20
   8   0   8  148.49    8.80
  -8   0  -8  149.69    9.20
  10   0   8   -2.10    3.20
 -10   0  -8   -0.90    2.10
 -10   0  -8   -8.70   15.80
  10   0   8   -4.00    2.20
 -12   0  -8  184.08   11.60
  12   0   8  189.28   11.20
  12   0   8  179.38   12.60
 -14   0  -8  216.78   13.50
  14   0   8  222.98   13.00
 -16   0  -8  408.16   21.20
  16   0   8  419.66   20.60
 -18   0  -8  775.82   35.70
  18   0   8  799.12   34.90
 -20   0  -8  895.31   41.30
  20   0   8  948.61   40.70
 -29  -1   8  456.15   22.50
 -29   1   8  443.96   22.70
 -27  -1   8  395.46   20.00
 -27   1   8  407.86   20.40
 -25  -1   8  285.37   15.40
 -25   1   8  295.57   15.70
 -23  -1   8  116.39    8.90
 -23   1   8  120.19    9.10
 -21  -1   8    0.70    2.30
 -21   1   8    0.10    2.40
 -19  -1   8   31.00    5.60
 -19  -1   8   32.90    4.80
 -19   1   8   32.20    5.00
 -17  -1   8   35.10    4.20
 -17  -1   8   31.90    5.00
 -17   1   8   22.30    2.90
 -17   1   8   26.30    4.50
 -15  -1   8    9.50    1.80
 -15  -1   8   11.10    2.50
 -15   1   8    7.70    2.40
 -15   1   8   10.00    2.20
 -13  -1   8   39.00    4.90
 -13  -1   8   28.90    3.50
 -13   1   8   37.50    4.60
 -13   1   8   32.70    4.10
 -11  -1   8  594.94   24.60
 -11  -1   8  646.14   25.90
 -11   1   8  618.84   25.60
 -11   1   8  614.74   25.20
  -9  -1   8 1437.36   54.99
  -9  -1   8 1372.76   53.69
   9  -1  -8 1380.26   63.19
  -9   1   8 1381.16   54.29
  -9   1   8 1412.56   54.79
  -7  -1   8 2127.49   80.79
  -7  -1   8 2042.50   79.49
  -7   1   8 2114.99   80.69
  -7   1   8 2047.10   79.99
   5  -1  -8 3643.14  134.39
  -5  -1   8 3227.78  121.59
  -5  -1   8 2905.41  120.19
  -5   1   8 2978.20  120.69
  -5   1   8 3091.89  121.49
  -3  -1   8 2137.89   86.69
  -3  -1   8 2376.86   88.09
  -3   1   8 2236.88   87.19
  -3   1   8 2352.76   88.19
  -1  -1   8 2535.95  100.39
  -1  -1   8 2431.56   99.29
  -1   1   8 2506.15   99.69
   1   1  -8 3009.70  113.89
  -1   1   8 2555.54  100.59
   1  -1   8 1962.40   78.19
  -1  -1  -8 2177.48   95.89
   1  -1   8 1932.61   77.19
  -1   1  -8 2037.10   77.69
  -1   1  -8 2018.90   92.39
   1   1   8 1990.80   78.49
   1   1   8 1977.10   77.59
   3  -1   8  268.17   12.10
   3  -1   8  272.97   13.30
   3   1   8  264.67   12.40
  -3   1  -8  279.07   12.60
   3   1   8  266.17   13.60
   5  -1   8   46.70    4.60
   5  -1   8   57.49    6.30
  -5  -1  -8   46.20    5.00
   5   1   8   44.60    5.00
  -5   1  -8   46.20    4.70
   5   1   8   44.80    6.50
   7  -1   8    0.10    1.70
   7  -1   8    2.80    2.70
  -7  -1  -8   -5.10   14.20
  -7  -1  -8    1.70    1.90
  -7   1  -8  -12.30   13.30
   7   1   8   -0.40    1.90
   7   1   8    0.20    2.80
  -7   1  -8    1.70    1.80
   9  -1   8    6.30    3.20
  -9  -1  -8    2.80    2.40
   9  -1   8    5.20    2.40
  -9  -1  -8   17.20   16.40
   9   1   8    3.30    3.40
  -9   1  -8    0.10   15.40
   9   1   8    4.60    2.40
  -9   1  -8    6.30    2.40
 -11  -1  -8   -0.60   16.50
 -11  -1  -8   21.90    3.60
  11  -1   8   20.90    3.60
  11  -1   8   24.20    4.30
  11   1   8   22.80    3.60
  11   1   8   16.90    4.50
 -11   1  -8   19.70    3.50
  13  -1   8  109.19    8.80
 -13  -1  -8   93.79    9.00
  13   1   8   89.39    8.70
 -13   1  -8   96.09   20.20
  13   1   8   79.19   10.40
 -13   1  -8  100.99    8.90
  15  -1   8  148.39   10.40
 -15  -1  -8  127.59   11.00
  15   1   8  130.79   10.70
 -15   1  -8  134.69   10.80
 -17  -1  -8  770.82   35.80
  17  -1   8  828.32   35.00
  17   1   8  808.52   35.00
 -17   1  -8  782.92   35.60
 -19  -1  -8  636.74   31.40
  19  -1   8  693.93   30.90
 -19   1  -8  665.23   31.50
  19   1   8  675.33   30.80
 -21  -1  -8  347.57   21.10
  21  -1   8  394.26   21.10
 -21   1  -8  351.36   21.20
  21   1   8  397.76   20.90
 -30  -2   8   -2.90    4.00
 -30   2   8   -3.60    4.00
 -28  -2   8   -3.20    3.40
 -28   2   8    6.30    8.00
 -28   2   8   -1.40    3.60
 -26  -2   8   17.20    3.80
 -26   2   8   16.50    4.00
 -26   2   8   12.70    8.60
 -24  -2   8   45.40    6.80
 -24   2   8   31.30    4.40
 -22  -2   8  112.39    8.20
 -22   2   8  124.19    8.90
 -22   2   8   81.99   20.70
 -20  -2   8  659.83   29.40
 -20  -2   8  701.13   28.10
 -20   2   8  715.83   28.80
 -20   2   8  618.04   40.30
 -18  -2   8  734.53   31.10
 -18  -2   8  726.43   29.80
 -18   2   8  737.73   30.50
 -16  -2   8  332.17   14.60
 -16  -2   8  351.46   16.10
 -16   2   8  323.87   15.10
 -16   2   8  345.37   15.50
 -14  -2   8  908.21   36.40
 -14  -2   8  955.70   37.90
 -14   2   8  913.51   37.40
 -14   2   8  942.51   37.20
 -12  -2   8  180.08    8.50
 -12  -2   8  193.78   10.30
 -12   2   8  201.68   10.00
 -12   2   8  191.48    9.80
 -10  -2   8  507.85   21.00
 -10  -2   8  470.35   19.10
 -10  -2   8  442.36   27.60
  10  -2  -8  474.05   30.70
 -10   2   8  494.65   20.60
 -10   2   8  507.55   20.50
  -8  -2   8   64.29    5.80
  -8   2   8   62.39    5.20
  -8   2   8   68.59    5.80
  -6  -2   8  141.89    8.30
  -6   2   8  147.09    7.70
  -6   2   8  146.29    8.40
   6   2  -8  132.29   16.40
  -4  -2   8   10.80    2.50
  -4   2   8   14.90    2.70
  -4   2   8   14.50    2.10
  -2  -2   8  377.26   16.10
  -2  -2   8  404.56   17.80
  -2   2   8  427.26   18.20
  -2   2   8  400.26   17.00
   0  -2   8  355.86   14.90
   0  -2   8  358.76   16.40
   0   2   8  370.26   16.90
   0   2   8  353.36   15.70
   0   2  -8  373.86   15.30
   2  -2   8   33.50    5.40
   2  -2   8   26.60    3.50
   2   2   8   39.70    4.50
  -2   2  -8   27.60   12.40
   2   2   8   32.30    5.90
  -2   2  -8   31.20    3.70
   4  -2   8  274.97   12.90
   4  -2   8  293.37   14.00
  -4   2  -8  295.77   34.20
  -4   2  -8  303.37   13.50
   4   2   8  289.57   13.40
   4   2   8  293.37   14.90
   6  -2   8  565.54   23.80
   6  -2   8  538.15   22.90
  -6  -2  -8  555.14   24.00
   6   2   8  553.54   24.80
  -6   2  -8  557.84   23.50
   6   2   8  532.95   23.30
  -8  -2  -8  888.71   38.00
   8  -2   8  901.61   36.90
   8  -2   8  945.21   37.60
  -8   2  -8  921.71   37.60
   8   2   8  928.21   38.80
   8   2   8  906.21   37.30
  10  -2   8 1010.20   42.70
  10  -2   8 1115.69   43.40
 -10  -2  -8 1041.20   44.00
 -10   2  -8 1043.50   43.50
  10   2   8 1051.49   43.20
  10   2   8 1106.29   44.80
 -12  -2  -8  710.13   31.60
  12  -2   8  703.93   30.30
 -12   2  -8  707.13   31.10
  12   2   8  730.83   32.40
  12   2   8  726.73   30.90
  14  -2   8  171.58   11.40
 -14  -2  -8  174.18   12.30
  14   2   8  172.88   13.50
 -14   2  -8  184.88   12.00
  14   2   8  179.28   12.00
  16  -2   8   66.49    8.60
 -16  -2  -8   64.59    9.20
  16   2   8   71.69    8.90
 -16   2  -8   55.39    8.70
  18  -2   8    5.20    3.80
 -18  -2  -8    2.00    3.70
  18   2   8    3.50    4.00
 -18   2  -8    4.90    3.80
 -20  -2  -8   -8.80   12.90
 -20  -2  -8    2.60    4.00
  20  -2   8    1.40    4.10
 -20   2  -8  -16.70   16.80
 -20   2  -8   -4.70    3.70
  20   2   8    1.50    4.30
 -29   3   8  125.99   11.40
 -29   3   8   92.79   22.80
 -27   3   8   20.40    9.60
 -27   3   8   29.40    4.70
 -25  -3   8    6.20    3.70
 -25   3   8    5.50    8.60
 -25   3   8    9.70    3.70
 -23  -3   8   14.40    3.40
 -23   3   8   12.20    9.50
 -23   3   8   20.40    4.00
 -21  -3   8  433.46   19.00
 -21  -3   8  403.76   21.20
 -21   3   8  443.76   20.00
 -19  -3   8 1158.48   48.80
 -19  -3   8 1190.88   46.80
 -19   3   8 1195.58   47.70
 -17  -3   8 1621.54   65.39
 -17  -3   8 1714.03   67.39
 -17   3   8 1733.43   66.59
 -15  -3   8 1240.08   49.70
 -15  -3   8 1170.88   47.70
 -15   3   8 1252.07   49.10
 -15   3   8 1258.47   48.50
 -13  -3   8 1381.26   56.69
 -13  -3   8 1518.55   58.89
 -13   3   8 1519.65   57.99
 -13   3   8 1497.25   58.29
  11  -3  -8    1.00    7.90
 -11  -3   8    6.90    2.60
 -11   3   8    8.00    2.40
 -11   3   8   13.40    2.50
   9  -3  -8   -1.10    8.40
  -9  -3   8   -4.20    4.70
  -9  -3   8    3.30    2.20
  -9   3   8    3.90    1.90
  -9   3   8    4.80    2.20
   7  -3  -8   24.70   10.90
  -7   3   8   11.40    2.20
  -7   3   8   15.10    2.80
  -5  -3   8 3193.48  122.99
   5  -3  -8 3431.76  137.79
  -5   3   8 3120.39  123.19
  -5   3   8 3056.09  122.39
  -3  -3   8  415.56   16.90
   3   3  -8  303.87   28.40
  -3   3   8  419.96   17.50
  -3   3   8  410.26   16.50
   3   3  -8  299.37   28.50
  -1  -3   8  248.78   12.10
  -1  -3   8  253.27   10.40
   1  -3  -8  215.38   32.70
  -1   3   8  248.48   12.90
  -1   3   8  251.77   11.70
   1   3  -8  249.48   10.60
  -1   3  -8   18.00    2.90
  -1   3  -8   26.90   11.80
   3  -3   8  660.63   27.90
   3  -3   8  706.33   29.00
  -3  -3  -8  706.13   49.10
   3   3   8  695.93   28.90
  -3   3  -8  734.03   48.50
  -3   3  -8  726.73   28.50
   3   3   8  680.83   30.20
   5  -3   8 2359.06   92.49
   5  -3   8 2500.35   93.39
  -5   3  -8 2128.49  110.69
   5   3   8 2425.36   93.29
   5   3   8 2490.75   94.89
  -5   3  -8 2541.85   93.29
   7  -3   8 1943.91   74.09
   7  -3   8 1832.22   73.49
   7   3   8 1909.21   75.79
  -7   3  -8 1914.51   74.19
   7   3   8 1872.61   74.09
  -9  -3  -8 1347.27   55.59
   9  -3   8 1344.17   54.19
   9  -3   8 1418.76   54.69
  -9   3  -8 1390.96   54.99
   9   3   8 1339.27   54.69
   9   3   8 1392.56   56.59
 -11  -3  -8  932.21   40.10
  11  -3   8  931.21   38.80
  11   3   8  945.41   39.40
 -11   3  -8  941.61   39.50
  11   3   8  994.00   41.30
 -13  -3  -8   49.10    7.60
  13  -3   8   47.50    6.90
  13   3   8   57.49    7.50
  13   3   8   35.60    5.80
 -13   3  -8   54.69    7.20
 -15  -3  -8   -0.40    3.10
 -15  -3  -8  -10.70   13.40
  15  -3   8   -2.90    2.90
 -15   3  -8   -2.20    2.90
  15   3   8    3.30    3.40
 -15   3  -8   -9.00   14.80
  15   3   8   -6.40    3.90
 -17  -3  -8    8.10    4.00
 -17  -3  -8   -5.80   13.30
  17  -3   8    6.40    3.70
 -17   3  -8  -10.70   15.80
 -17   3  -8    8.40    3.90
  17   3   8   10.60    4.30
 -19  -3  -8   84.09   10.80
  19  -3   8   83.69   10.00
 -19   3  -8   81.99   10.40
 -28   4   8  139.79   26.70
 -28   4   8  180.18   12.80
 -26   4   8   -0.80   10.40
 -26   4   8   21.00    4.60
 -24   4   8    0.60    3.40
 -22  -4   8  111.99   11.10
 -22   4   8   94.39    8.90
 -20  -4   8  329.87   18.50
 -20   4   8  342.17   16.70
 -18  -4   8  616.54   28.40
 -18   4   8  627.54   27.00
 -16  -4   8  391.06   16.90
 -16  -4   8  374.76   19.00
 -16   4   8  385.86   17.80
 -14  -4   8  822.82   35.10
 -14  -4   8  811.22   32.60
 -14   4   8  842.12   34.30
 -14   4   8  845.62   33.70
 -12  -4   8    5.80    2.80
 -12  -4   8   -4.80    9.10
 -12   4   8   10.20    2.50
 -12   4   8    6.90    2.60
 -10  -4   8  429.46   19.70
 -10   4   8  436.96   19.20
 -10   4   8  442.06   19.60
  -8  -4   8  329.17   27.00
  -8  -4   8  362.16   16.60
  -8   4   8  362.46   16.10
  -8   4   8  362.66   16.60
   6  -4  -8  405.56   32.80
  -6  -4   8  327.07   15.80
  -6   4   8  330.27   16.10
  -6   4   8  317.37   15.30
  -4  -4   8 1255.27   49.70
  -4   4   8 1234.98   49.30
   4   4  -8 1265.97   59.09
  -4   4   8 1234.78   50.19
  -2  -4   8 1230.58   50.89
   2  -4  -8 1425.46   69.69
  -2   4   8 1232.18   51.89
  -2   4   8 1269.87   50.69
   0  -4   8   64.49    6.10
   0  -4   8   69.09    4.00
   0   4   8   71.59    6.10
   0   4  -8   72.99    4.20
   0   4   8   63.99    7.20
   2  -4   8    0.40    1.30
   2  -4   8   -1.30    2.10
   2   4   8    4.10    2.80
  -2   4  -8    1.60    1.30
   2   4   8    2.90    2.20
   4  -4   8  145.69    9.60
  -4  -4  -8  223.98   34.70
   4  -4   8  163.08    8.30
   4   4   8  170.98    9.70
   4   4   8  176.68   11.50
  -4   4  -8  179.38    8.80
   6  -4   8 1156.28   48.20
   6  -4   8 1173.08   48.80
  -6   4  -8 1252.57   48.90
  -6   4  -8 1317.87   71.49
   6   4   8 1238.28   51.29
   6   4   8 1248.48   49.30
   8  -4   8  531.05   23.60
   8  -4   8  541.25   23.30
   8   4   8  552.14   24.10
  -8   4  -8  563.64   24.00
   8   4   8  576.04   26.60
  10  -4   8  789.22   33.70
 -10  -4  -8  804.52   35.30
  10   4   8  843.22   34.60
 -10   4  -8  817.62   34.50
  10   4   8  850.81   37.00
 -12  -4  -8  172.98   11.80
  12  -4   8  171.38   10.80
  12   4   8  186.38   13.90
  12   4   8  186.58   11.50
 -12   4  -8  176.18   11.20
 -14  -4  -8   23.10    4.30
  14  -4   8   24.00    4.00
 -14   4  -8   23.40    4.20
  14   4   8   24.20    4.40
  14   4   8   23.00    5.70
 -16  -4  -8   95.69   10.50
  16  -4   8  114.39    9.90
  16   4   8   99.29   10.40
 -16   4  -8  113.99   10.30
  16   4   8  100.09   13.20
 -18  -4  -8   92.49   10.90
  18  -4   8   98.39   10.00
 -18   4  -8   97.89   10.50
  18   4   8   91.49   10.70
 -20  -4  -8   78.69   10.90
  20  -4   8   78.89   10.50
  20   4   8   82.49   10.90
 -20   4  -8   78.29   10.90
 -27   5   8   -2.40    3.80
 -25   5   8   -3.90    3.50
 -23  -5   8   -0.10    4.70
 -21  -5   8    2.80    4.50
 -21   5   8   -1.00    3.20
 -19  -5   8    4.20    4.20
 -19   5   8    7.20    3.20
 -17  -5   8   -4.10    3.50
 -17   5   8    2.30    2.60
 -15  -5   8  165.48   12.00
 -15   5   8  186.38   10.60
 -13  -5   8   -5.60    3.00
 -13   5   8   -0.30    2.50
 -13   5   8   -0.10    2.20
 -11  -5   8  137.09   10.30
 -11   5   8  159.98    9.50
 -11   5   8  161.98    9.90
   9  -5  -8    2.00    9.50
  -9   5   8    8.00    2.70
  -9   5   8    6.00    2.40
  -7  -5   8   69.79    6.80
  -7   5   8   72.69    6.40
  -7   5   8   76.49    7.00
  -5  -5   8  131.99    8.60
  -5   5   8  140.99    9.30
  -5   5   8  133.69    8.30
   3   5  -8   28.00   10.50
  -1  -5   8   28.20    5.30
   1  -5  -8   39.20   14.20
   1   5  -8   33.60    9.10
  -1   5   8   37.90    5.50
  -1   5   8   24.10    4.00
  -1  -5  -8   -2.80   12.50
   1  -5   8   -2.50    2.10
  -1   5  -8    0.50    1.20
   1   5   8   -0.50    2.70
  -1   5  -8   -7.20    7.70
   1   5   8   -0.40    2.10
   3  -5   8   95.99    5.70
   3  -5   8   94.69    7.10
   3   5   8  103.29    7.60
  -3   5  -8  105.19    6.10
   3   5   8  102.39    9.70
   5  -5   8   33.30    4.20
   5  -5   8   23.50    3.50
   5   5   8   36.30    5.80
  -5   5  -8   39.80    4.40
   5   5   8   30.60    5.00
   7  -5   8    3.00    2.50
  -7  -5  -8   -5.50   14.10
   7  -5   8    8.20    2.20
   7   5   8   10.30    3.10
   7   5   8   13.00    4.40
  -7   5  -8   -8.00   14.20
  -7   5  -8   10.30    2.40
   9  -5   8   23.80    3.20
  -9   5  -8   -5.60   13.70
   9   5   8   24.40    3.90
   9   5   8   25.50    5.60
  11  -5   8   27.10    3.80
  11   5   8   31.80    6.00
 -11   5  -8   40.20    6.40
  11   5   8   51.09    7.40
 -13  -5  -8   -4.00   13.50
  13  -5   8   -0.10    2.90
  13   5   8   -0.60    4.50
 -13   5  -8   -3.10    2.80
 -13   5  -8   -9.90   15.00
  13   5   8   -1.00    3.40
 -15  -5  -8   37.00    5.70
  15  -5   8   62.49    8.20
 -15   5  -8   55.89    8.50
  15   5   8   36.70    7.00
  15   5   8   40.00    5.70
 -17  -5  -8   -0.30   13.70
 -17  -5  -8   -4.20    3.70
  17  -5   8    0.20    3.60
 -17   5  -8   -3.70   16.40
 -17   5  -8   -1.50    3.60
  17   5   8    1.10    4.10
  17   5   8   -5.90    7.40
 -19  -5  -8    3.40    4.40
  19  -5   8    1.20    4.10
 -19  -5  -8   -7.40   13.20
  19   5   8    1.20    4.10
 -19   5  -8  -13.30   16.40
 -19   5  -8   -0.40    4.20
 -26   6   8   -3.30    3.80
 -24  -6   8    0.90    4.60
  24   6  -8    1.40    7.40
 -22  -6   8   99.59   12.10
 -22   6   8   81.89    9.60
 -20  -6   8  265.57   17.60
 -20   6   8  269.97   15.20
 -18  -6   8  726.03   33.80
 -18   6   8  723.53   31.40
 -16  -6   8 1255.27   52.49
 -16   6   8 1236.08   50.69
 -14  -6   8 1256.67   52.29
 -14   6   8 1243.28   50.69
 -12  -6   8  545.15   25.80
 -12   6   8  578.84   24.80
 -12   6   8  545.45   24.50
 -10  -6   8   46.00    7.70
 -10   6   8   48.00    6.80
 -10   6   8   49.99    6.20
  -8  -6   8  491.15   23.00
  -8   6   8  499.75   22.80
  -8   6   8  511.15   22.20
  -6  -6   8  408.46   19.30
  -6   6   8  408.96   19.80
  -6   6   8  417.16   18.80
  -4  -6   8  688.43   29.80
  -4   6   8  706.83   30.90
  -4   6   8  704.23   29.40
  -2  -6   8  208.98   11.70
  -2   6   8  215.78   11.70
  -2   6   8  222.88   13.40
   0  -6   8    7.90    2.80
   0   6   8   10.20    2.90
   0   6   8   17.80    4.20
   2  -6   8  325.87   15.80
   2   6   8  329.07   15.90
   2   6   8  341.07   18.80
   4  -6   8  704.43   29.30
  -4   6  -8  749.73   28.80
  -4   6  -8  565.54   49.80
   4   6   8  730.43   29.70
   4   6   8  741.73   33.30
   6  -6   8 1425.96   59.19
   6   6   8 1503.85   59.89
  -6   6  -8 1571.14   59.49
   6   6   8 1519.65   63.69
   8   6   8 1487.95   63.79
  -8   6  -8 1533.65   59.69
   8   6   8 1472.95   59.89
  10  -6   8   86.29    7.20
  10   6   8   71.59   11.60
  10   6   8   76.39    8.70
 -10   6  -8   87.29    7.80
  12  -6   8  458.75   21.30
  12   6   8  458.75   25.80
 -12   6  -8  476.95   22.10
  12   6   8  462.35   22.00
 -14  -6  -8   -6.50   14.30
  14  -6   8   -0.60    3.30
  14   6   8    5.30    5.50
 -14   6  -8   -4.00    3.30
 -14   6  -8   -3.10   15.70
  14   6   8    2.70    3.80
  16  -6   8   -2.50    3.70
 -16  -6  -8   -4.10   13.30
 -16   6  -8   -6.80    3.60
  16   6   8    3.00    3.80
  16   6   8   -3.70    5.30
 -16   6  -8   -0.10   16.10
  18  -6   8    9.00    4.30
 -18  -6  -8   -7.60   13.20
 -18   6  -8   -7.70   16.50
  18   6   8   12.90    4.40
 -18   6  -8    4.60    4.50
 -25  -7   8    0.30    4.90
 -25   7   8   -7.40    3.40
  25   7  -8    2.00    6.70
 -23  -7   8   57.89   10.90
 -23   7   8   35.50    5.30
  23   7  -8   25.60    9.20
 -21  -7   8  224.48   16.50
 -21   7   8  212.68   13.60
 -19  -7   8  776.52   36.50
 -19   7   8  764.22   33.60
 -17  -7   8  647.84   31.50
 -17   7   8  641.54   28.60
 -15  -7   8 1606.04   66.69
 -15   7   8 1606.54   64.49
 -13  -7   8  737.03   34.10
 -13   7   8  758.12   32.20
 -11  -7   8  810.92   36.50
 -11   7   8  852.01   35.60
 -11   7   8  822.42   35.00
  -9  -7   8   -4.40    3.10
   9  -7  -8   -9.80   11.90
  -9   7   8    0.90    2.90
  -9   7   8    2.00    2.50
  -7  -7   8   88.69    9.10
   7  -7  -8   73.19   17.80
  -7   7   8  112.39    9.50
  -7   7   8  115.99    8.30
  -5  -7   8  332.47   16.80
   5  -7  -8  276.77   36.70
  -5   7   8  335.27   15.90
  -5   7   8  339.67   17.70
  -3  -7   8  632.94   27.80
  -3   7   8  626.94   29.50
  -3   7   8  643.54   27.40
  -1  -7   8   41.50    6.40
  -1   7   8   32.30    5.50
  -1   7   8   49.60    6.60
   1  -7   8   58.69    6.90
   1   7   8   65.49   10.20
   1   7   8   69.59    7.30
   3  -7   8  474.35   21.90
   3  -7   8  498.75   45.50
   3   7   8  492.55   22.20
   3   7   8  501.75   26.40
   5  -7   8 1763.62   72.49
   5   7   8 1871.11   72.99
   5   7   8 1908.31   77.89
   7   7   8 1415.56   57.19
   7   7   8 1423.36   62.19
   9   7   8  766.12   37.30
   9   7   8  712.23   31.70
  11   7   8  191.58   12.50
  11   7   8  175.48   16.90
  13   7   8  325.47   23.10
 -13   7  -8  350.56   21.20
  13   7   8  380.76   18.80
 -15  -7  -8  -11.10   13.30
  15   7   8    0.30    5.90
  15   7   8    8.00    4.10
 -15   7  -8    4.50    4.30
 -17  -7  -8   -5.70   13.10
  17   7   8    2.80    4.00
 -17   7  -8   -6.90    4.00
 -24  -8   8    3.30    6.00
  24   8  -8   -1.40    8.40
 -24   8   8    6.80    4.30
 -22  -8   8   67.49   12.30
 -22   8   8   64.19    9.00
 -20  -8   8   86.59   12.60
 -20   8   8   86.09    9.40
 -18  -8   8  272.87   18.60
 -18   8   8  260.87   14.80
  18   8  -8  229.48   24.60
 -16  -8   8  231.18   17.10
 -16   8   8  223.48   13.70
 -14  -8   8  880.21   40.10
 -14   8   8  879.51   37.60
 -12  -8   8  171.88   14.20
 -12   8   8  157.38   11.70
 -10  -8   8   35.90    5.90
 -10   8   8   33.30    4.60
 -10   8   8   35.40    5.40
  -8  -8   8  155.98   12.40
  -8   8   8  167.18   11.00
  -8   8   8  153.48   12.40
  -6  -8   8   24.50    4.70
  -6   8   8   30.60    5.40
  -6   8   8   27.90    4.10
   4  -8  -8  -12.70   14.90
  -4  -8   8    7.70    3.80
  -4   8   8    8.00    3.30
  -4   8   8    7.20    4.30
  -2  -8   8  237.18   14.30
  -2   8   8  259.87   13.90
  -2   8   8  252.37   17.20
   0  -8   8  210.98   13.00
   0   8   8  215.88   12.60
   0   8   8  215.38   16.60
   2  -8   8  153.68   36.00
   2  -8   8  162.38   11.20
   2   8   8  149.19   11.10
   2   8   8  173.38   15.60
   4  -8   8  519.95   24.10
   4   8   8  530.65   24.10
   4   8   8  549.15   29.80
   6   8   8  298.07   21.40
   6   8   8  295.77   15.70
   8   8   8   35.90    7.90
   8   8   8   33.00    4.60
  10   8   8  344.87   24.50
  10   8   8  363.26   18.20
  12   8   8  125.49   17.20
  12   8   8  152.98   11.30
  14   8   8  181.68   12.40
  14   8   8  142.69   18.20
  16   8   8   29.70    9.20
 -23  -9   8    3.80    6.10
  23   9  -8    1.80    8.10
 -23   9   8    9.80    4.30
 -21  -9   8   -2.30    6.00
 -21   9   8    1.40    3.60
  21   9  -8   -4.30    8.50
 -19  -9   8    9.70    6.20
  19   9  -8    4.20    9.30
 -19   9   8   17.60    4.20
 -17  -9   8    7.10    6.10
 -17   9   8   16.30    4.00
  17   9  -8   -0.90    8.40
 -15  -9   8   -0.80    5.00
 -15   9   8   -2.80    3.00
 -13  -9   8  173.58   14.70
 -13   9   8  160.48   11.70
 -11  -9   8    8.70    5.30
 -11   9   8    7.80    3.90
  -9  -9   8  440.96   23.40
  -9   9   8  425.76   20.80
  -9   9   8  415.16   22.90
  -7  -9   8 1046.70   44.40
  -7   9   8 1024.70   42.40
  -7   9   8  968.70   44.90
  -5  -9   8 1040.70   43.80
  -5   9   8  983.30   45.40
  -5   9   8  996.00   42.00
  -3  -9   8 1271.97   52.19
  -3   9   8 1219.98   54.89
  -3   9   8 1225.18   50.69
  -1  -9   8  599.04   27.40
  -1   9   8  562.44   26.20
  -1   9   8  569.84   31.10
   1  -9   8  344.67   18.40
   1   9   8  320.77   17.30
   1   9   8  332.07   22.80
  -3  -9  -8    9.60   19.40
   3  -9   8   23.00    4.80
   3  -9   8   12.30   16.70
   3   9   8   30.90    7.40
   3   9   8   23.60    4.40
  -5  -9  -8  -12.10   20.10
   5   9   8   23.00    4.40
   5   9   8   23.50    7.50
   7   9   8   17.90    3.90
   7   9   8   19.90    7.20
   9   9   8   40.00    9.00
 -11  -9  -8  -22.80   22.50
  11   9   8    4.10    3.60
  11   9   8   -7.50    6.40
 -13  -9  -8   -4.40   16.60
  13   9   8    8.10    8.10
  13   9   8   19.10    4.60
 -22 -10   8   -5.30    5.80
  22  10  -8    6.60    8.30
 -20 -10   8    9.80    6.40
 -20  10   8    6.50    3.90
  20  10  -8   -7.30    8.00
 -18 -10   8   54.19    8.70
 -18  10   8   75.69    9.00
  18  10  -8   30.00   11.20
 -16 -10   8  120.49   14.40
 -16  10   8  123.19   10.50
 -14 -10   8    3.40    5.60
 -14  10   8    2.00    3.30
  14  10  -8   -5.80    8.80
 -12 -10   8   15.90    5.70
 -12  10   8    7.10    3.70
 -10 -10   8  197.88   15.60
 -10  10   8  185.58   12.50
  -8 -10   8  400.46   22.20
  -8  10   8  376.76   19.00
  -8  10   8  345.47   22.00
  -6 -10   8 1002.10   44.20
  -6  10   8  953.60   45.50
  -6  10   8 1002.10   41.70
  -4 -10   8 1574.94   63.49
  -4  10   8 1442.26   65.69
  -4  10   8 1505.05   61.09
  -2 -10   8  978.50   42.10
  -2  10   8  921.51   45.50
  -2  10   8  920.21   39.80
   0 -10   8  945.81   40.80
   0  10   8  915.91   39.00
   0  10   8  891.71   45.40
   2 -10   8  124.59   11.60
   2  10   8  101.99   16.00
   2  10   8   86.19   10.10
  -4 -10  -8   -9.80   22.90
   4  10   8   -1.80    6.60
   4  10   8   -0.70    3.60
   6  10   8   31.80    9.30
   8  10   8  221.68   13.80
   8  10   8  207.78   21.90
 -10 -10  -8  -23.80   25.40
  10  10   8   24.20    9.90
 -12 -10  -8  -16.40   17.80
  12  10   8   -2.00    3.70
 -19 -11   8   -4.30    6.00
  19  11  -8    2.70    9.00
 -19  11   8    0.80    3.80
 -17 -11   8    1.50    6.20
 -17  11   8    0.30    3.70
  17  11  -8    5.40    9.90
 -15 -11   8   -3.30    5.80
  15  11  -8   -9.80    9.50
 -15  11   8   -3.50    3.40
 -13 -11   8   -1.30    5.70
  13  11  -8  -15.40   10.30
 -13  11   8   -1.70    3.80
 -11  11   8   25.40    5.00
  11  11  -8   11.80   11.00
  -9 -11   8  147.79   14.60
  -9  11   8  120.89   11.10
  -7 -11   8  207.68   16.60
  -7  11   8  199.18   13.30
  -7  11   8  198.88   17.80
  -5 -11   8  407.36   23.60
  -5  11   8  406.96   20.50
  -5  11   8  398.46   25.70
  -3 -11   8  205.08   16.60
  -3 -11   8  151.38   39.40
  -3  11   8  200.48   19.30
  -3  11   8  211.98   13.50
  -1 -11   8  243.38   17.50
  -1 -11   8  225.08   45.00
  -1  11   8  226.28   20.80
  -1  11   8  229.18   14.30
   1 -11   8   22.40   18.80
   1  11   8   44.30    9.50
  -3 -11  -8    2.40   22.60
   3  11   8   34.30    5.10
   3  11   8   34.40    9.60
  -5 -11  -8   -1.10   23.40
   5  11   8   -1.40    3.60
   5  11   8  -10.60    6.70
  -7 -11  -8   -3.30   24.20
   7  11   8   -4.50    3.60
  -9 -11  -8   -8.70   25.90
   9  11   8   -4.40    3.80
   9  11   8  -13.50    7.60
 -16 -12   8  121.89   16.20
 -16  12   8  125.89   11.60
 -14 -12   8   88.69   14.60
 -14  12   8   83.29   10.50
 -12 -12   8   24.60    7.60
 -12  12   8   26.60    5.30
 -10 -12   8   15.70    7.00
  10  12  -8   -7.40   10.00
 -10  12   8    8.80    4.70
  -8 -12   8    2.00    5.90
   8  12  -8   -3.90    9.80
  -6 -12   8   -6.40   15.60
  -6 -12   8   20.10    6.50
  -6  12   8    6.30    6.60
  -6  12   8    4.60    4.40
   6  12  -8    3.10    9.10
   4 -12  -8   -3.30   23.40
  -4 -12   8   14.10    6.00
  -4 -12   8   -3.10   16.40
  -4  12   8    7.70    4.40
   4  12  -8   -4.90    8.50
  -4  12   8    3.70    7.20
   2 -12  -8   -0.10   27.20
  -2 -12   8    0.50   17.30
  -2 -12   8    8.20    5.70
  -2  12   8   -2.40    3.80
  -2  12   8   -4.70    6.70
   2  12  -8    2.00    8.40
   0 -12  -8   -8.50   24.70
   0 -12   8    6.10   19.00
   0 -12   8    3.40    5.50
   0  12  -8    0.40    8.40
   0  12   8    2.00    4.00
  -2 -12  -8   -3.10   24.70
   2  12   8   21.10    4.60
   2  12   8   12.10    8.50
  -4 -12  -8    9.70   32.90
   4  12   8   41.10   10.50
  -6 -12  -8   16.90   32.80
   6  12   8   63.09    9.80
   6  12   8   36.80   10.80
 -13 -13   8   86.39   32.80
 -11 -13   8    1.90    6.50
 -11  13   8   -3.30    4.00
  11  13  -8    7.00   10.10
  -9 -13   8   18.90    6.90
  -9  13   8   10.80    4.90
   9  13  -8    9.10   10.20
   7  13  -8   66.09   13.80
  -5 -13   8  240.38   18.20
   5  13  -8  164.68   24.70
  -5  13   8  186.38   13.90
  -5  13   8  190.68   21.10
  -3 -13   8  222.38   17.30
  -3  13   8  167.78   21.30
  -3  13   8  175.38   13.70
  -1  13   8   71.89   12.20
  -1  13   8  106.59   11.10
  -1 -13  -8    4.90   25.50
   1  13   8  -11.00    7.20
   1  13   8   -3.10    4.20
 -30   0   9    1.20    4.20
 -28   0   9    0.90    4.10
 -26   0   9   -2.30    3.40
 -24   0   9   -2.70    2.80
 -22   0   9   -0.90    2.40
 -20   0   9    0.10    2.00
 -18   0   9    1.10    2.20
 -18   0   9    1.30    1.70
 -16   0   9   -1.40    2.00
 -16   0   9   -0.70    1.50
 -14   0   9   -2.80    1.90
 -14   0   9   -1.60    1.40
 -12   0   9    1.10    2.10
 -12   0   9    3.50    1.50
 -10   0   9    0.00    2.00
 -10   0   9    0.80    1.40
  -8   0   9   -1.50    2.10
  -8   0   9   -0.50    1.40
  -6   0   9    1.40    1.50
   6   0  -9    9.50    8.80
  -6   0   9    1.50    2.10
  -4   0   9    1.30    2.10
  -4   0   9    0.00    1.50
   4   0  -9    5.00    9.80
  -2   0   9    2.80    1.60
  -2   0   9    1.30    2.30
   2   0  -9   -3.50   11.50
   0   0   9    3.40    2.40
   0   0   9    0.90    1.60
   0   0  -9   -5.90   12.10
  -2   0  -9   -1.80   13.40
   2   0   9    4.70    2.60
   2   0   9    1.30    1.80
   4   0   9    2.60    2.80
   4   0   9   -0.30    1.80
  -4   0  -9   -5.00   14.60
  -4   0  -9    2.00    1.80
  -6   0  -9    1.90    1.90
   6   0   9    4.00    3.10
  -6   0  -9  -12.80   15.50
   6   0   9   -1.60    1.90
  -8   0  -9  -15.00   16.00
   8   0   9   -0.90    3.20
   8   0   9   -1.40    2.10
  -8   0  -9   -1.30    1.90
  10   0   9   -3.00    2.60
 -10   0  -9    0.40    2.30
 -10   0  -9  -15.90   16.80
  10   0   9   -1.00    3.70
  12   0   9    2.90    2.90
 -12   0  -9    2.60    2.90
  12   0   9   -2.50    4.10
  14   0   9   11.80    3.50
 -14   0  -9    5.40    3.20
  16   0   9   -0.80    3.40
 -16   0  -9   -2.90    3.40
 -18   0  -9   -3.90    3.70
  18   0   9   -3.60    3.90
 -20   0  -9   -9.10   17.20
  20   0   9   -2.40    4.30
 -20   0  -9    0.30    4.40
 -29  -1   9    1.20    3.70
 -29   1   9   -6.40    3.80
 -27  -1   9   11.00    4.00
 -27   1   9    6.90    4.10
 -25  -1   9  190.78   11.70
 -25   1   9  180.88   11.90
 -23  -1   9  470.65   21.20
 -23   1   9  466.35   21.50
 -21  -1   9  293.77   13.80
 -21  -1   9  252.57   15.50
 -21   1   9  297.57   14.20
 -19  -1   9  596.64   25.10
 -19  -1   9  591.44   25.90
 -19   1   9  568.14   26.10
 -19   1   9  655.83   25.70
 -17  -1   9  101.89    6.50
 -17  -1   9  102.39    7.70
 -17   1   9  108.29    7.40
 -17   1   9  127.89    7.30
 -15  -1   9   13.90    2.00
 -15  -1   9   17.00    2.90
 -15   1   9   18.00    2.80
 -15   1   9   27.30    4.00
 -13  -1   9  673.83   27.60
 -13  -1   9  642.44   26.40
 -13   1   9  663.03   27.40
 -13   1   9  660.43   27.00
 -11  -1   9 1175.68   47.00
 -11  -1   9 1234.48   48.30
 -11   1   9 1238.78   47.80
 -11   1   9 1208.38   48.20
  -9  -1   9  529.65   22.30
  -9  -1   9  507.45   20.90
  -9   1   9  524.35   22.30
  -9   1   9  523.25   21.50
  -7  -1   9  861.01   34.80
  -7  -1   9  924.41   36.30
  -7   1   9  893.51   35.40
  -7   1   9  893.01   36.20
  -5  -1   9  208.98   10.70
  -5  -1   9  190.78    9.00
  -5   1   9  206.48   10.80
  -5   1   9  202.68    9.70
   3  -1  -9   40.00   13.60
  -1  -1   9  670.43   27.90
  -1  -1   9  649.54   26.60
  -1   1   9  680.73   28.20
  -1   1   9  668.73   27.00
   1  -1   9 2017.20   81.89
   1  -1   9 2039.80   82.89
   1   1   9 2061.29   83.29
  -1   1  -9 2458.65  101.49
   1   1   9 2099.99   82.39
  -3  -1  -9 1095.19   67.99
   3  -1   9 1195.08   47.00
   3  -1   9 1187.68   46.00
   3   1   9 1199.68   46.30
  -3   1  -9 1040.80   65.29
  -3   1  -9 1239.78   46.70
   3   1   9 1216.08   47.60
   5  -1   9  467.75   21.10
   5  -1   9  473.55   20.00
  -5  -1  -9  472.25   20.90
  -5   1  -9  478.15   20.60
   5   1   9  458.65   21.60
   5   1   9  453.65   20.20
  -7  -1  -9  330.77   16.30
   7  -1   9  324.57   16.50
   7  -1   9  332.17   15.40
  -7   1  -9  345.47   16.10
   7   1   9  345.27   17.30
   7   1   9  337.37   15.80
  -9  -1  -9    3.40    2.60
   9  -1   9   -1.40    2.50
   9  -1   9    4.40    3.50
  -9  -1  -9   -7.90   17.20
   9   1   9    2.40    3.80
   9   1   9    2.90    2.60
  -9   1  -9    0.60    2.30
 -11  -1  -9   23.20    3.90
  11  -1   9   22.10    3.70
  11  -1   9   23.10    4.70
  11   1   9   26.70    4.10
 -11   1  -9   24.80    4.00
  11   1   9   19.80    5.00
 -13  -1  -9  552.14   26.40
  13  -1   9  567.14   25.50
  13   1   9  595.44   25.80
 -13   1  -9  567.04   26.30
  13   1   9  568.84   28.20
  15  -1   9  188.28   12.10
 -15  -1  -9  168.88   12.80
  15   1   9  185.28   12.60
 -15   1  -9  179.08   12.70
 -17  -1  -9  132.39   12.20
  17  -1   9  154.88   11.80
 -17   1  -9  141.49   12.10
  17   1   9  149.49   12.10
  19  -1   9    7.50    4.30
 -19  -1  -9    7.80    4.70
 -19   1  -9    8.00    4.50
 -19   1  -9  -13.90   16.50
  19   1   9    6.80    4.50
 -30   2   9   32.20    5.60
 -30   2   9   33.40   11.80
 -28  -2   9   -1.40    5.10
 -28   2   9    1.40    9.20
 -28   2   9   -2.40    3.50
 -26  -2   9  109.59    9.00
 -26   2   9   70.79   22.30
 -26   2   9  105.29    9.50
 -24  -2   9  557.84   24.40
 -24   2   9  551.74   25.00
 -22  -2   9  333.27   21.60
 -22  -2   9  429.46   18.40
 -22   2   9  430.96   19.10
 -20  -2   9  546.05   23.50
 -20  -2   9  547.95   24.90
 -20   2   9  569.34   24.20
 -18  -2   9  477.65   20.80
 -18  -2   9  500.95   22.30
 -18   2   9  509.65   21.70
 -18   2   9  489.95   22.00
 -16  -2   9    8.10    2.70
 -16   2   9    6.90    2.30
 -14  -2   9   46.30    4.00
 -14  -2   9   64.59    6.30
 -14   2   9   55.19    5.80
 -14   2   9   55.29    5.40
 -12  -2   9 1061.59   43.50
 -12  -2   9 1174.28   45.40
 -12   2   9 1127.49   45.00
 -12   2   9 1149.29   44.90
 -10  -2   9 1528.25   60.89
 -10  -2   9 1652.33   62.79
 -10   2   9 1606.64   62.09
 -10   2   9 1580.04   62.49
  -8  -2   9  797.22   32.00
  -8   2   9  762.92   31.90
  -8   2   9  765.72   31.30
  -6  -2   9  925.71   36.70
  -6   2   9  877.11   35.90
  -6   2   9  909.61   36.90
   4  -2  -9   12.30   12.10
  -4  -2   9    0.10    2.20
  -4  -2   9    1.60    1.20
   4   2  -9    4.60    8.90
  -4   2   9    0.90    1.80
  -4   2   9    0.40    2.20
  -2  -2   9   61.69    6.40
  -2  -2   9   65.09    4.20
  -2   2   9   67.89    6.80
  -2   2   9   64.59    5.20
   2   2  -9   91.59   22.60
   0  -2  -9 2972.80  121.89
   0  -2   9 2620.34  100.49
   0  -2   9 2478.75   99.19
   0   2  -9 2386.26  114.89
   0   2   9 2542.35   99.89
   0   2   9 2593.24  101.09
   2  -2   9  888.21   36.80
   2  -2   9  920.61   38.00
   2   2   9  943.91   38.90
  -2   2  -9  961.60   37.40
   2   2   9  955.30   37.60
   4  -2   9 1988.80   78.99
   4  -2   9 2035.70   79.89
  -4   2  -9 2106.69   79.69
   4   2   9 2066.59   80.99
   4   2   9 2036.60   79.59
   6  -2   9  700.43   27.80
  -6  -2  -9  652.73   28.80
   6  -2   9  678.33   28.70
   6   2   9  660.53   29.80
  -6   2  -9  694.53   28.40
   6   2   9  643.04   28.10
   8  -2   9  352.16   16.90
   8  -2   9  344.57   15.80
  -8  -2  -9  335.17   16.80
  -8   2  -9  334.87   16.40
   8   2   9  328.47   18.10
   8   2   9  334.47   16.20
 -10  -2  -9   -0.30    2.70
  10  -2   9   -1.90    2.60
 -10  -2  -9    4.30   17.50
  10  -2   9    3.80    3.70
  10   2   9   -0.60    4.10
 -10   2  -9   -5.40   18.50
  10   2   9   -1.70    2.80
 -10   2  -9    3.10    2.60
 -12  -2  -9  260.37   15.20
  12  -2   9  260.97   14.10
  12   2   9  288.47   16.80
  12   2   9  254.47   14.50
 -12   2  -9  267.57   14.70
 -14  -2  -9  328.37   18.40
  14  -2   9  340.97   17.30
  14   2   9  343.17   24.20
 -14   2  -9  326.87   17.90
  14   2   9  347.57   17.70
  16  -2   9  286.77   16.20
 -16  -2  -9  275.57   17.10
 -16   2  -9  277.17   16.70
  16   2   9  321.27   17.00
  18  -2   9   42.60    5.80
 -18  -2  -9   36.60    6.10
 -18   2  -9   36.10    5.80
 -20  -2  -9   -0.20    4.30
 -20   2  -9   -3.70    4.00
 -29   3   9   -1.90    3.80
 -27   3   9   10.60    4.00
 -25   3   9    3.10    3.30
 -23  -3   9   80.39   14.10
 -23   3   9   89.59    8.40
 -21  -3   9   56.09    7.80
 -21   3   9   51.89    7.00
 -19  -3   9   26.60    4.70
 -19  -3   9   35.40    4.90
 -19   3   9   26.00    3.80
 -17  -3   9   47.50    7.30
 -17  -3   9   44.80    4.50
 -17   3   9   39.00    6.20
 -15  -3   9    6.20    1.60
 -15  -3   9    8.20    3.10
 -15   3   9    3.90    2.60
 -15   3   9    7.90    2.60
 -13  -3   9   -0.30    2.50
 -13   3   9    1.10    2.10
 -13   3   9    1.00    2.30
  11  -3  -9  164.88   22.60
 -11  -3   9  189.38   10.70
 -11   3   9  196.38   10.50
 -11   3   9  203.38   10.30
  -9  -3   9  100.09    7.60
  -9   3   9   97.89    7.50
  -9   3   9  106.19    7.00
  -7  -3   9  128.09    8.50
  -7   3   9  127.79    7.80
  -7   3   9  142.99    9.00
   5  -3  -9   39.70   13.30
  -5  -3   9   35.20    5.40
  -5   3   9   42.80    5.00
  -5   3   9   41.90    6.10
   3  -3  -9   49.50   15.10
  -3  -3   9   41.20    5.50
  -3   3   9   45.80    5.20
  -3   3   9   44.00    6.40
   3   3  -9   65.79   22.80
   1  -3  -9   30.40   15.40
  -1  -3   9   14.70    3.00
  -1   3   9   19.40    3.50
  -1   3   9   15.30    2.50
   1   3  -9   25.00   11.20
   1  -3   9  763.72   31.30
   1  -3   9  803.42   32.80
  -1  -3  -9  657.53   53.09
   1   3   9  813.32   33.90
   1   3   9  801.92   32.40
  -1   3  -9  835.22   31.80
  -1   3  -9  866.81   52.49
   3  -3   9   75.59    7.60
   3  -3   9   90.09    5.70
   3   3   9   87.69    7.10
  -3   3  -9   88.19    5.90
   3   3   9   96.49    8.80
   5  -3   9  469.85   20.30
   5  -3   9  482.85   21.50
  -5   3  -9  502.85   21.00
   5   3   9  471.85   23.00
   5   3   9  476.75   21.20
   7  -3   9   48.60    5.80
   7  -3   9   69.69    7.80
  -7   3  -9   48.80    6.00
   7   3   9   67.49    6.80
   7   3   9   68.79    9.00
  -9  -3  -9    4.70   16.90
   9  -3   9   20.20    4.00
   9  -3   9   11.40    3.00
  -9  -3  -9   12.90    3.80
   9   3   9   14.60    3.40
  -9   3  -9   10.00    3.10
   9   3   9   16.40    4.80
  -9   3  -9   -8.40   17.50
 -11  -3  -9  -15.40   16.30
  11  -3   9    0.80    2.70
 -11  -3  -9    0.10    3.20
 -11   3  -9   -3.40   17.40
 -11   3  -9    3.60    2.90
  11   3   9   -1.10    4.10
  11   3   9    3.60    3.20
 -13  -3  -9  -16.50   16.40
  13  -3   9    2.90    3.10
 -13  -3  -9    1.20    3.40
  13   3   9    8.50    3.50
  13   3   9    3.00    4.60
 -13   3  -9    0.70    2.90
 -13   3  -9  -10.30   14.50
  15  -3   9   -0.50    3.20
 -15  -3  -9    7.20    3.90
 -15  -3  -9  -13.10   14.20
 -15   3  -9   -9.50   16.00
 -15   3  -9    1.50    3.50
  15   3   9   10.90    3.90
  17  -3   9   -5.10    3.30
 -17  -3  -9   -2.20    3.50
 -17   3  -9  -14.70   16.30
  17   3   9    3.90    4.00
 -17   3  -9   -5.70    3.50
  19  -3   9    2.20    4.20
 -19  -3  -9    5.20    4.60
 -19  -3  -9  -13.00   14.40
  19   3   9    4.00    4.40
 -19   3  -9   -9.00   17.10
 -19   3  -9    4.10    4.20
 -28   4   9    1.90    3.90
 -26   4   9    6.00    3.80
 -24   4   9  191.98   12.40
 -22  -4   9  112.69   10.90
 -22   4   9  115.39    9.40
 -20  -4   9  305.37   17.40
 -20   4   9  315.77   15.90
 -18  -4   9   81.69    9.50
 -18   4   9   91.19    8.20
 -16  -4   9    8.70    3.80
 -16   4   9   13.00    3.10
 -16   4   9   12.00    3.00
 -14  -4   9  592.04   26.80
 -14   4   9  621.44   26.30
 -14   4   9  606.44   25.90
 -12  -4   9  587.54   25.50
 -12   4   9  571.84   24.90
 -12   4   9  570.94   24.90
 -10  -4   9 1543.55   61.09
 -10   4   9 1573.24   60.99
 -10   4   9 1490.95   60.49
  -8  -4   9  564.74   23.80
   8  -4  -9  501.45   38.70
  -8   4   9  535.55   23.10
  -8   4   9  567.14   24.00
   6  -4  -9   15.20   12.00
  -6  -4   9   19.90    3.20
  -6   4   9   20.30    3.40
  -6   4   9   19.40    2.80
  -4  -4   9  156.98    9.50
  -4   4   9  161.18   10.30
  -4   4   9  169.28    9.30
  -2  -4   9   74.49    7.00
   2  -4  -9   76.89   17.30
  -2   4   9   87.19    6.80
  -2   4   9   91.29    8.00
   0  -4  -9   66.59   17.40
   0  -4   9   77.09    5.00
   0  -4   9   85.99    7.20
   0   4   9   93.09    6.90
   0   4   9   93.89    8.40
   0   4  -9   96.29    5.30
   2  -4   9  101.69    6.20
   2  -4   9  112.09    8.00
   2   4   9  117.49    9.60
  -2   4  -9  125.69    6.70
   2   4   9  119.59    7.90
   4  -4   9  253.77   13.30
   4  -4   9  251.27   11.90
  -4   4  -9  263.57   12.40
   4   4   9  277.47   15.40
   4   4   9  264.97   13.40
   6  -4   9   -1.60    1.90
   6  -4   9   -1.00    2.70
  -6  -4  -9    0.30   15.90
   6   4   9    2.20    3.50
  -6   4  -9    0.20    2.00
   6   4   9    0.30    2.50
  -6   4  -9    0.00   14.70
   8  -4   9    6.40    2.70
  -8  -4  -9   -2.20   16.10
   8  -4   9   15.40    3.40
   8   4   9   16.20    4.70
  -8   4  -9   -9.60   16.00
   8   4   9   15.40    3.40
  -8   4  -9    9.40    3.00
  10  -4   9  231.08   13.10
 -10   4  -9  241.78   13.80
  10   4   9  271.57   16.60
  10   4   9  260.27   13.90
 -12  -4  -9  173.38   12.40
  12  -4   9  154.28   10.70
  12   4   9  178.38   11.60
  12   4   9  177.18   14.20
 -12   4  -9  164.78   11.40
  14  -4   9  294.17   15.80
 -14  -4  -9  283.87   17.10
  14   4   9  298.77   16.40
 -14   4  -9  299.67   16.70
  14   4   9  301.07   19.10
 -16  -4  -9  352.26   19.90
  16  -4   9  353.36   18.50
  16   4   9  362.66   19.10
 -16   4  -9  358.06   19.50
 -18  -4  -9  160.28   13.80
  18  -4   9  167.98   12.70
 -18   4  -9  174.48   13.60
  18   4   9  169.78   13.80
 -27   5   9    7.90    4.30
 -25   5   9   90.69    9.70
 -23  -5   9  453.15   24.40
 -23   5   9  470.25   22.20
 -21  -5   9  497.45   25.50
 -21   5   9  522.15   23.70
 -19  -5   9  311.87   17.90
 -19   5   9  308.97   16.00
 -17  -5   9  210.98   13.90
 -17   5   9  220.18   12.40
 -15  -5   9  201.18   12.90
 -15   5   9  210.08   11.70
 -15   5   9  175.68   11.40
 -13  -5   9 1577.44   64.79
 -13   5   9 1592.24   64.09
 -13   5   9 1672.53   64.19
 -11  -5   9 1236.18   51.19
 -11   5   9 1217.98   50.39
 -11   5   9 1319.67   50.99
  -9  -5   9 1773.52   70.19
  -9   5   9 1749.43   69.59
  -9   5   9 1790.12   70.29
  -7  -5   9 1491.15   59.39
  -7   5   9 1483.25   58.99
  -7   5   9 1493.75   59.79
  -5  -5   9  111.29    8.50
  -5   5   9  113.99    8.10
  -5   5   9  116.49    9.00
  -3  -5   9   -3.60    2.40
   3  -5  -9    2.80   13.40
  -3   5   9    1.20    2.70
  -3   5   9   -0.70    2.30
   1  -5  -9  100.29   31.80
  -1  -5   9  140.49    9.10
  -1   5   9  157.78   10.80
  -1   5   9  154.58    9.20
   1  -5   9  540.55   24.70
   1  -5   9  580.64   25.10
  -1   5  -9  633.94   24.10
   1   5   9  585.34   25.10
   1   5   9  592.84   27.30
   3  -5   9  581.84   26.10
   3  -5   9  587.94   24.90
   3   5   9  623.84   28.90
   3   5   9  631.34   26.50
  -3   5  -9  663.73   25.60
   5  -5   9   -0.80    2.40
  -5  -5  -9    5.90   15.70
   5  -5   9    0.20    1.80
  -5   5  -9    1.30    1.80
   5   5   9    5.00    2.70
  -5   5  -9  -12.20   14.30
   5   5   9    2.90    4.00
   7  -5   9  610.24   26.40
   7  -5   9  604.54   26.80
  -7   5  -9  659.53   27.20
   7   5   9  670.93   27.80
   7   5   9  628.54   30.50
  -9  -5  -9  -16.20   15.50
   9  -5   9    1.60    2.40
  -9   5  -9    1.30    2.40
   9   5   9    3.10    3.10
  -9   5  -9   10.00   15.00
   9   5   9    0.20    4.10
  11  -5   9   86.49    7.90
  11   5   9   85.89   11.60
 -11   5  -9   82.39    8.30
  11   5   9   82.69    9.10
  13  -5   9  874.51   37.60
  13   5   9  893.71   38.40
  13   5   9  903.51   41.50
 -13   5  -9  911.31   38.70
  15  -5   9  770.82   33.90
  15   5   9  762.12   34.40
  15   5   9  790.72   37.80
 -15   5  -9  800.52   35.10
 -26   6   9    6.10    4.10
 -24  -6   9    6.70    5.00
 -24   6   9    2.60    3.70
  24   6  -9   -5.70    7.40
 -22  -6   9  161.98   14.00
 -22   6   9  135.99   11.10
 -20  -6   9  137.49   13.00
 -20   6   9  125.59   10.40
 -18  -6   9   18.50    5.40
 -18   6   9   12.20    3.80
 -16  -6   9  247.18   15.80
 -16   6   9  244.18   14.00
 -14  -6   9 1509.15   63.29
 -14   6   9 1628.74   62.39
 -14   6   9 1512.35   62.09
 -12  -6   9  192.98   13.10
 -12   6   9  213.78   12.60
 -12   6   9  198.88   11.90
 -10  -6   9  631.74   29.70
  10  -6  -9  738.93   50.09
 -10   6   9  680.03   29.60
 -10   6   9  656.03   28.80
  -8  -6   9  171.38   11.40
   8  -6  -9  139.19   30.50
  -8   6   9  187.98   11.60
  -8   6   9  186.88   10.70
  -6  -6   9  196.58   12.30
  -6   6   9  220.08   11.80
  -6   6   9  220.38   13.00
  -4  -6   9   -2.70    2.60
   4  -6  -9   -9.00   12.80
  -4   6   9    2.60    2.50
  -4   6   9    1.90    2.90
  -2  -6   9   -2.40    2.40
   2  -6  -9    2.00   14.00
  -2   6   9    0.80    3.00
  -2   6   9    0.00    2.50
   0  -6   9   19.20    3.40
   0  -6  -9   41.90   16.30
   0   6   9   20.10    3.50
   0   6   9   19.80    4.40
   2  -6   9  263.67   13.90
   2   6   9  285.97   14.20
   2   6   9  276.17   17.00
  -4  -6  -9    5.70   15.90
   4  -6   9    6.50    2.70
   4   6   9    6.30    3.10
   4   6   9    1.90    4.50
   6  -6   9   20.50    3.50
  -6  -6  -9    6.50   16.30
   6   6   9   17.50    5.70
   6   6   9   31.40    4.30
   8   6   9  145.99   14.60
   8   6   9  172.18   11.20
  -8   6  -9  173.18   11.60
  10  -6   9   30.80    4.70
 -10  -6  -9    9.70   16.80
  10   6   9   27.80    4.80
 -10   6  -9   49.70    6.70
 -10   6  -9   19.00   16.90
  10   6   9   31.50    6.80
  12  -6   9  122.19   10.00
  12   6   9  103.79   14.00
 -12   6  -9  132.69   10.30
  12   6   9  106.69   10.80
  14  -6   9  202.88   13.20
 -14   6  -9  214.18   13.90
  14   6   9  196.98   17.40
  14   6   9  192.58   14.00
  16  -6   9  111.19   10.90
 -16   6  -9  117.49   11.80
  16   6   9  109.69   15.00
  16   6   9  129.69   11.60
 -25  -7   9   16.00    5.90
  25   7  -9   11.90    8.40
 -25   7   9   12.00    4.50
 -23  -7   9  107.99   12.80
 -23   7   9   79.39    9.80
 -21  -7   9  181.38   15.20
 -21   7   9  170.88   12.40
 -19  -7   9  101.39   12.60
 -19   7   9   70.59    9.20
 -17  -7   9   -1.50    4.90
 -17   7   9    1.70    3.40
 -15  -7   9   24.20    5.70
 -15   7   9   24.10    4.60
 -13  -7   9  398.36   21.70
 -13   7   9  412.56   20.20
 -13   7   9  426.26   20.90
 -11  -7   9   -2.70    3.70
 -11   7   9   -3.70    3.30
 -11   7   9   -2.70    3.00
  -9  -7   9  134.79   11.20
  -9   7   9  158.28   11.30
  -9   7   9  143.79   10.30
  -7  -7   9   -3.30    3.10
  -7   7   9    0.00    2.80
  -7   7   9    4.50    3.40
   5  -7  -9    0.10   14.80
  -5  -7   9    0.10    3.20
  -5   7   9    8.00    3.10
  -5   7   9    7.30    3.70
  -3  -7   9    3.00    3.20
   3  -7  -9   -4.60   14.90
  -3   7   9    8.10    3.00
  -3   7   9    3.90    3.70
  -1  -7   9   91.89    8.50
  -1   7   9  109.79    8.70
  -1   7   9  110.79   11.30
   1  -7   9  127.99    9.40
   1   7   9  135.59   13.00
   1   7   9  133.59    9.80
   3  -7   9  210.58   12.10
   3   7   9  212.38   12.70
   3   7   9  217.78   16.50
   5  -7   9  152.58   10.00
   5   7   9  157.98   11.00
   5   7   9  145.99   15.00
   7   7   9   50.39    8.20
   7   7   9   31.90    7.00
  -9  -7  -9    3.90   17.10
   9   7   9    2.90    3.50
   9   7   9    0.40    5.40
 -11  -7  -9   -8.60   16.50
  11   7   9   -6.50    5.50
  11   7   9   -0.20    3.70
 -13  -7  -9   -6.30   14.50
  13   7   9   -0.30    3.90
  13   7   9   -5.10    5.90
  15   7   9   24.20    5.10
  15   7   9   11.00    7.10
 -24  -8   9  297.97   21.00
 -24   8   9  325.17   18.00
 -22  -8   9  346.37   22.30
 -22   8   9  366.46   19.20
 -20  -8   9  330.67   20.70
  20   8  -9  240.28   26.20
 -20   8   9  318.17   17.00
 -18  -8   9  150.28   14.80
 -18   8   9  145.89   11.30
 -16  -8   9   16.60    5.80
 -16   8   9   16.80    4.40
 -14  -8   9   74.89   11.10
 -14   8   9   66.89    9.00
 -12  -8   9  572.34   28.60
 -12   8   9  622.14   28.10
 -12   8   9  578.64   27.00
 -10  -8   9  800.52   35.40
 -10   8   9  760.32   33.60
 -10   8   9  772.42   34.90
  -8  -8   9  487.55   23.70
  -8   8   9  452.95   24.00
  -8   8   9  490.65   22.60
  -6  -8   9  421.26   21.40
  -6   8   9  436.66   22.90
  -6   8   9  435.06   20.70
   4  -8  -9   -1.60   16.20
  -4  -8   9    0.50    3.50
  -4   8   9    0.70    3.30
  -4   8   9    2.00    4.20
  -2  -8   9  105.09    9.60
  -2   8   9  102.69   12.30
  -2   8   9  101.19    9.60
   0  -8   9  467.85   22.30
   0   8   9  485.15   26.50
   0   8   9  470.05   22.20
   2  -8   9  858.71   36.40
   2   8   9  871.91   41.40
   2   8   9  851.71   36.40
   4  -8   9  383.16   18.70
   4   8   9  402.16   24.40
   4   8   9  365.26   18.90
   6   8   9  401.66   25.10
   6   8   9  390.56   19.60
   8   8   9   52.69    8.40
   8   8   9   38.80    8.20
 -10  -8  -9  -19.70   18.70
  10   8   9   -4.50    6.20
  10   8   9    0.60    3.50
  12   8   9  202.38   13.20
  12   8   9  159.08   18.70
  14   8   9  372.66   27.20
  14   8   9  415.06   20.80
 -23  -9   9  159.58   16.30
 -23   9   9  162.68   12.60
  23   9  -9  129.59   22.40
 -21  -9   9  143.99   16.00
 -21   9   9  154.48   12.00
  21   9  -9  157.88   23.70
 -19  -9   9  254.07   19.10
 -19   9   9  264.77   15.10
  19   9  -9  185.98   25.10
 -17  -9   9   24.30    6.70
 -17   9   9   25.40    4.60
 -15  -9   9    9.30    5.40
 -15   9   9    2.80    3.50
 -13  -9   9  172.78   14.50
 -13   9   9  156.88   11.70
 -11  -9   9  470.75   25.10
 -11   9   9  470.75   22.90
 -11   9   9  495.15   24.80
  -9  -9   9  396.96   21.80
  -9   9   9  392.06   22.00
  -9   9   9  382.36   19.50
  -7  -9   9   99.09   11.60
  -7   9   9   93.19    9.90
  -7   9   9   84.49   12.10
  -5  -9   9   36.30    5.80
   5  -9  -9   12.00   18.60
  -5   9   9   23.60    6.10
  -5   9   9   25.40    4.80
  -3  -9   9    2.60    4.30
   3  -9  -9   -0.20   18.70
  -3   9   9   -2.90    3.50
  -3   9   9   -2.90    4.90
  -1  -9   9  146.49   11.90
  -1   9   9  135.39   11.40
  -1   9   9  156.88   15.90
   1  -9   9  118.19   10.80
   1  -9   9  123.69   36.80
   1   9   9   92.99   10.10
   1   9   9  129.79   15.40
   3  -9   9  260.97   15.10
   3   9   9  252.27   15.00
   3   9   9  256.87   20.90
   5   9   9  150.88   17.40
   5   9   9  151.48   11.60
   7   9   9   18.70    7.60
   7   9   9   22.20    4.50
   9   9   9   -2.90    6.80
   9   9   9    2.70    3.80
 -11  -9  -9  -16.90   18.50
  11   9   9    7.50    7.50
  13   9   9  127.39   11.50
  13   9   9   95.49   18.00
 -20 -10   9    1.00    6.00
  20  10  -9  -10.10    8.40
 -20  10   9    0.00    3.70
 -18 -10   9   -9.10    5.40
  18  10  -9    0.00   10.20
 -18  10   9   -4.50    3.30
 -16 -10   9    0.50    5.70
 -16  10   9   -0.30    3.50
  16  10  -9   -7.60    9.20
 -14 -10   9    6.90    5.60
 -14  10   9    7.80    3.90
 -12 -10   9   13.60    5.50
 -12  10   9   24.80    4.50
 -10 -10   9   10.80    5.50
 -10  10   9    0.00    5.00
 -10  10   9    4.70    3.40
  -8 -10   9    1.70    5.00
  -8  10   9    5.00    3.80
  -8  10   9   -1.60    5.10
  -6 -10   9   34.10    6.60
   6 -10  -9   18.80   21.30
  -6  10   9   30.70    7.30
  -6  10   9   52.99    8.50
   4 -10  -9   18.90   22.00
  -4 -10   9   14.00    5.80
  -4  10   9   20.00    7.00
  -4  10   9   19.30    4.50
  -2 -10   9  110.79   12.50
  -2  10   9   88.89   10.00
  -2  10   9   98.89   15.40
   0 -10   9   15.00    5.30
   0 -10   9   13.10   16.20
   0 -10  -9   10.90   22.80
   0  10   9    4.50    6.60
   0  10   9    7.70    4.20
   2 -10   9   28.70    5.50
   2  10   9   22.40    4.60
   2  10   9   31.10    8.60
  -4 -10  -9  -23.70   24.80
   4  10   9   -1.60    6.90
   4  10   9    1.80    3.80
   6  10   9    8.60    7.70
   6  10   9   11.30    4.20
   8  10   9   -5.10    3.60
 -10 -10  -9  -20.10   24.70
  10  10   9    0.30    3.70
 -19 -11   9  160.58   17.10
  19  11  -9  123.89   23.60
 -19  11   9  160.78   12.50
 -17 -11   9    1.10    6.00
  17  11  -9   -5.20   10.00
 -17  11   9    1.00    3.80
 -15 -11   9   -2.20    5.80
 -15  11   9   -2.00    3.60
  15  11  -9  -14.50   10.40
 -13 -11   9   85.89   13.90
 -13  11   9   86.29   10.20
 -11 -11   9  286.47   20.10
 -11  11   9  285.77   16.80
  -9 -11   9  372.56   22.40
  -9  11   9  360.76   25.40
  -9  11   9  349.37   19.10
  -7 -11   9  181.68   15.50
  -7  11   9  156.78   12.50
  -7  11   9  157.08   16.80
  -5 -11   9   88.29   12.60
  -5  11   9   71.69    9.80
  -5  11   9   50.99    9.20
  -3 -11   9   20.40    6.20
  -3 -11   9   23.70   17.10
   3 -11  -9    6.60   24.60
  -3  11   9   14.90    4.60
  -3  11   9   13.10    7.40
  -1 -11   9  330.77   19.70
  -1  11   9  259.77   23.50
  -1  11   9  317.77   17.20
   1 -11   9  310.07   20.30
   1  11   9  309.87   17.20
   1  11   9  273.37   24.80
   3  11   9  330.87   27.60
   3  11   9  370.76   19.10
   5  11   9  243.18   24.80
   5  11   9  278.47   16.00
   7  11   9   53.29   12.20
  -9 -11  -9  -24.70   30.10
  16  12  -9   -3.90   11.00
 -14 -12   9   38.40    8.60
 -14  12   9   33.30    5.60
  14  12  -9   11.90   11.00
 -12 -12   9  192.38   18.10
 -12  12   9  197.48   14.10
 -10 -12   9  158.48   16.20
 -10  12   9  130.29   12.20
  -8 -12   9  136.99   15.10
  -8  12   9  106.79   11.40
  -6  12   9   33.00    8.80
  -6  12   9   32.10    5.60
   4 -12  -9  -11.40   21.60
  -4 -12   9  -13.40   16.30
  -4  12   9   -1.20    7.00
  -4  12   9   -5.00    4.10
   2 -12  -9    9.20   29.00
  -2 -12   9   10.50   18.10
  -2  12   9   28.10    9.20
  -2  12   9   29.40    5.50
   0 -12   9  219.68   23.70
   0  12   9  185.68   21.90
   0  12   9  216.78   14.20
   2  12   9  228.98   25.00
   2  12   9  309.37   16.80
   4  12   9  194.98   13.50
   4  12   9  131.69   21.80
  11  13  -9   13.20   10.90
  -9 -13   9  -16.00   17.50
  -9 -13   9   -0.30    6.20
   9  13  -9    1.00   10.10
  -9  13   9   -4.80    4.10
  -7 -13   9    5.50    6.10
  -7 -13   9  -13.70   18.10
  -7  13   9   -6.10    3.80
   7  13  -9   -0.90   10.20
  -5 -13   9  -12.80   18.40
  -5 -13   9    4.70    6.10
  -5  13   9   -4.30    4.20
   5  13  -9   -5.70    9.90
   3 -13  -9   14.30   30.10
  -3 -13   9    6.70    5.90
  -3 -13   9   -9.90   19.60
  -3  13   9   -7.90    4.00
   3  13  -9  -16.10    8.90
   1 -13  -9    7.00   32.80
  -1  13   9    5.00    4.60
  -1  13   9   -1.40    8.70
 -30   0  10  413.56   21.40
 -28   0  10  691.43   30.80
 -26   0  10  846.12   36.00
 -24   0  10  833.12   35.00
 -22   0  10  381.36   17.80
 -20   0  10    7.20    2.40
 -20   0  10   -1.50    2.70
 -18   0  10  159.88    9.90
 -18   0  10  174.38    9.10
 -16   0  10  226.18   11.00
 -16   0  10  236.28   12.10
 -14   0  10  115.89    6.70
 -14   0  10  125.19    8.20
 -12   0  10   76.89    5.30
 -12   0  10   75.99    6.60
 -10   0  10   48.20    5.80
 -10   0  10   49.40    4.30
  -8   0  10  439.06   18.40
  -8   0  10  446.26   19.80
  -6   0  10 2192.38   85.69
  -6   0  10 2274.87   86.89
  -4   0  10 3337.07  131.99
   4   0 -10 3603.04  148.59
  -4   0  10 3451.75  133.19
  -2   0  10 2902.91  108.99
   2   0 -10 2687.33  125.69
  -2   0  10 2851.01  107.79
   0   0  10 3387.26  126.89
   0   0  10 3246.08  127.89
   2   0  10 1768.22   69.89
   2   0  10 1772.02   68.79
   4   0  10  466.85   20.50
   4   0  10  471.45   21.90
  -4   0 -10  492.55   21.20
   6   0  10   11.60    3.80
  -6   0 -10   -2.20   17.20
   6   0  10    8.90    2.60
  -6   0 -10    9.80    2.60
   8   0  10  558.44   25.40
   8   0  10  539.85   24.10
  -8   0 -10  554.54   24.80
  10   0  10  320.77   16.20
  10   0  10  318.87   17.70
 -10   0 -10  328.57   16.90
 -12   0 -10  -13.10   17.60
 -12   0 -10   21.90    4.00
  14   0  10    8.10    3.70
 -14   0 -10    5.40    3.50
 -16   0 -10   20.80    4.60
 -16   0 -10   15.30   16.60
  16   0  10   20.70    4.60
 -18   0 -10   88.79   11.00
  18   0  10  102.69   11.10
 -29  -1  10  244.98   15.30
 -29   1  10  241.88   15.10
 -27  -1  10  368.36   18.30
 -27   1  10  356.06   18.60
 -25  -1  10  288.57   15.00
 -25   1  10  287.17   15.30
 -23  -1  10  452.15   20.50
 -23   1  10  449.16   20.70
 -21  -1  10   11.40    3.30
 -21  -1  10    6.50    2.50
 -21   1  10    5.80    2.70
 -19  -1  10  119.39    8.60
 -19  -1  10   97.29    7.10
 -19   1  10  121.09    7.90
 -19   1  10   99.29    8.10
 -17  -1  10    3.20    2.60
 -17  -1  10    1.80    1.80
 -17   1  10   -2.90    2.50
 -17   1  10    2.90    2.10
 -15  -1  10    7.00    2.60
 -15  -1  10    4.60    1.60
 -15   1  10    4.70    2.00
 -15   1  10    1.60    2.50
 -13  -1  10    3.50    1.60
 -13  -1  10    3.30    2.50
 -13   1  10    5.20    2.00
 -13   1  10    2.70    2.50
 -11  -1  10    4.10    2.40
 -11  -1  10   -0.40    1.30
 -11   1  10    1.40    2.40
 -11   1  10    2.40    1.90
  -9  -1  10    6.40    1.60
  -9  -1  10    8.40    2.50
  -9   1  10   10.50    2.10
  -9   1  10   10.20    2.60
  -7  -1  10 1443.46   56.09
  -7  -1  10 1377.56   54.59
  -7   1  10 1431.56   56.09
  -7   1  10 1405.36   55.09
  -5  -1  10 1567.84   62.29
   5  -1 -10 1456.15   79.39
  -5  -1  10 1698.43   63.99
   5   1 -10 1637.24   76.09
  -5   1  10 1655.53   62.79
  -5   1  10 1694.93   63.99
  -3  -1  10 2569.44  104.29
   3  -1 -10 3061.39  125.69
  -3  -1  10 2667.33  105.59
  -3   1  10 2663.63  104.69
   3   1 -10 2726.73  119.59
  -3   1  10 2713.93  105.89
  -1  -1  10  732.53   30.60
  -1  -1  10  732.73   31.90
   1   1 -10  893.41   51.39
  -1   1  10  748.83   32.30
  -1   1  10  751.42   31.00
   1  -1  10  961.50   39.70
   1  -1  10  971.00   40.90
   1   1  10  987.60   40.10
   1   1  10  991.20   41.40
  -1   1 -10 1119.19   62.69
   3  -1  10  145.59   10.00
   3  -1  10  143.49    8.20
  -3  -1 -10  133.49   36.40
  -3   1 -10  149.99    8.60
   3   1  10  140.69    8.50
   3   1  10  139.49   10.50
   5  -1  10   67.49    6.00
  -5  -1 -10   71.49    6.70
   5  -1  10   75.89    8.20
   5   1  10   61.89    8.60
  -5   1 -10   63.99    6.20
   5   1  10   55.79    6.30
   7  -1  10   10.20    3.80
  -7  -1 -10    3.50   19.00
  -7  -1 -10   14.60    3.20
   7  -1  10    9.70    2.60
   7   1  10    3.50    2.80
   7   1  10    9.70    4.20
  -7   1 -10   10.60    2.70
  -7   1 -10    3.90   18.20
  -9  -1 -10  -15.00   18.50
  -9  -1 -10    8.60    3.10
   9  -1  10    8.50    2.90
   9  -1  10    7.00    4.00
  -9   1 -10   12.70    3.10
   9   1  10   10.50    4.50
  -9   1 -10  -14.30   17.80
   9   1  10    6.70    3.20
 -11  -1 -10   31.60    4.60
  11  -1  10   44.20    6.80
 -11   1 -10   43.50    6.90
  11   1  10   46.40    7.50
  11   1  10   23.90    5.30
  13  -1  10   48.30    7.80
 -13  -1 -10   51.49    8.10
 -13   1 -10   34.50    5.00
  13   1  10   55.89    7.90
 -13   1 -10   18.40   21.10
 -15  -1 -10   -8.70   18.10
  15  -1  10   20.50    4.40
 -15  -1 -10   17.10    4.40
 -15   1 -10   19.70    4.60
  15   1  10   22.00    4.60
 -17  -1 -10   84.49   10.70
  17  -1  10   92.09   10.10
 -17   1 -10   68.79   10.20
  17   1  10  100.19   10.60
 -19  -1 -10  130.29   13.10
  19  -1  10  156.98   12.80
 -19   1 -10  138.49   13.00
  19   1  10  154.08   13.20
 -30   2  10   -0.30    4.10
 -28   2  10   -1.30    3.80
 -26   2  10    0.70    3.40
 -24  -2  10    5.50    3.90
 -24   2  10    6.70    3.30
 -22  -2  10   45.80    5.90
 -22  -2  10   30.40    4.90
 -22   2  10   44.60    6.70
 -20  -2  10   77.59    8.50
 -20  -2  10   74.69    6.50
 -20   2  10   79.49    7.50
 -18  -2  10  409.26   18.30
 -18  -2  10  443.26   20.30
 -18   2  10  430.96   19.40
 -18   2  10  446.36   19.60
 -16  -2  10  426.06   19.10
 -16  -2  10  380.46   17.00
 -16   2  10  427.66   18.40
 -16   2  10  395.96   18.50
 -14  -2  10  784.12   32.00
 -14  -2  10  707.53   30.00
 -14   2  10  786.12   31.40
 -14   2  10  768.12   31.70
 -12  -2  10  622.84   25.80
 -12  -2  10  672.53   27.90
 -12   2  10  649.83   27.60
 -12   2  10  673.73   27.30
 -10  -2  10  331.77   14.40
 -10  -2  10  362.86   16.60
 -10   2  10  364.16   16.60
 -10   2  10  356.16   15.80
  -8  -2  10   32.80    5.50
  -8   2  10   33.00    4.70
  -8   2  10   39.70    5.90
  -6  -2  10   65.39    4.10
  -6  -2  10   52.89    6.50
  -6   2  10   66.59    6.80
  -6   2  10   64.99    5.50
   4  -2 -10   63.19   16.90
  -4  -2  10   49.30    6.60
  -4  -2  10   62.19    4.30
  -4   2  10   66.09    5.60
  -4   2  10   69.99    7.00
  -2  -2  10   90.49    5.50
  -2  -2  10   91.49    7.90
  -2   2  10  101.39    6.70
  -2   2  10  106.49    8.40
   0  -2  10  300.27   15.20
   0  -2  10  297.27   13.30
   0   2  10  316.67   14.40
   0   2  10  313.57   15.90
   2  -2  10  119.59    7.10
   2  -2  10  117.79    9.10
  -2   2 -10  127.29    7.50
   2   2  10  135.89    8.20
   2   2  10  116.99   10.00
   4  -2  10  290.67   14.50
  -4  -2 -10  206.98   41.40
   4  -2  10  273.17   12.90
   4   2  10  274.77   13.60
  -4   2 -10  281.87   13.40
   4   2  10  275.57   15.60
  -6  -2 -10  180.78   41.40
   6  -2  10  219.98   12.50
   6  -2  10  193.38   10.80
   6   2  10  190.08   11.30
  -6   2 -10  210.08   11.50
   6   2  10  215.68   13.70
   8  -2  10  302.07   15.30
   8  -2  10  329.17   16.60
  -8  -2 -10  325.57   16.60
   8   2  10  299.47   15.80
   8   2  10  323.77   18.00
  -8   2 -10  318.57   16.00
  10  -2  10  213.18   12.10
 -10  -2 -10  221.68   13.30
 -10   2 -10  206.48   12.60
  10   2  10  216.38   12.60
  10   2  10  202.08   14.60
  12  -2  10  203.28   12.00
 -12  -2 -10  195.88   13.20
 -12   2 -10  193.88   12.60
  12   2  10  204.38   12.60
  12   2  10  183.48   14.40
  14  -2  10  155.18   11.20
 -14  -2 -10  152.98   12.10
 -14   2 -10  147.99   11.80
  14   2  10  150.18   11.80
 -16  -2 -10   63.99    9.90
  16  -2  10   66.29    9.20
 -16   2 -10   62.89    9.60
 -18  -2 -10   -8.20   14.70
  18  -2  10   -3.60    3.70
 -18  -2 -10    3.30    4.20
 -18   2 -10  -14.10   17.50
 -18   2 -10    1.50    3.90
  18   2  10    4.50    4.40
 -29   3  10  195.48   13.80
 -27   3  10   57.69    8.50
 -25   3  10  253.57   14.40
 -23  -3  10    7.60    3.90
 -23   3  10    0.00    3.00
 -21  -3  10   -2.50    3.70
 -21   3  10    1.20    2.80
 -19  -3  10  358.46   18.90
 -19   3  10  389.16   18.00
 -17  -3  10 1535.25   61.49
 -17   3  10 1532.95   60.69
 -17   3  10 1519.85   60.29
 -15  -3  10 1574.74   62.39
 -15   3  10 1575.74   61.79
 -15   3  10 1529.25   61.59
 -13  -3  10 1331.07   53.59
 -13   3  10 1357.06   53.09
 -13   3  10 1307.77   53.09
 -11  -3  10  749.92   31.40
 -11   3  10  738.43   31.20
 -11   3  10  740.53   30.80
  -9  -3  10  238.18   12.40
  -9   3  10  230.48   11.80
  -9   3  10  230.68   12.60
  -7   3  10    2.60    2.20
   5  -3 -10  406.06   37.40
  -5  -3  10  319.07   16.00
  -5   3  10  342.47   16.80
  -5   3  10  322.57   15.40
  -3  -3  10  796.92   32.70
  -3   3  10  830.02   33.70
  -3   3  10  799.52   32.20
   3   3 -10  723.43   48.20
  -1  -3  10 1401.86   55.19
  -1  -3  10 1328.17   53.49
  -1   3  10 1393.56   54.69
  -1   3  10 1423.56   56.19
   1  -3  10  324.67   16.20
   1  -3  10  325.57   14.40
   1   3  10  333.97   15.60
   1   3  10  335.37   17.30
  -1   3 -10  345.97   14.80
   3   3  10    2.90    3.30
  -3   3 -10   31.80   16.10
   5  -3  10  357.76   16.90
   5  -3  10  404.56   18.60
   5   3  10  407.96   20.20
  -5   3 -10  322.37   44.40
   5   3  10  394.16   18.00
  -5   3 -10  403.06   17.80
   7  -3  10  903.61   37.10
   7  -3  10  829.52   35.90
   7   3  10  871.51   36.70
  -7   3 -10  901.51   36.90
   7   3  10  917.61   39.00
   9  -3  10  968.20   40.40
  -9   3 -10  974.00   41.20
   9   3  10  993.20   41.00
   9   3  10 1016.80   43.20
 -11  -3 -10  779.42   35.70
  11  -3  10  799.12   34.30
 -11   3 -10  831.32   35.20
  11   3  10  825.02   37.00
  11   3  10  833.92   35.00
  13  -3  10  398.06   19.20
 -13  -3 -10  364.86   20.30
  13   3  10  402.16   19.70
  13   3  10  389.96   22.10
 -13   3 -10  377.66   19.80
  15  -3  10  136.99   10.90
 -15  -3 -10  136.69   12.00
 -15   3 -10  125.39   11.40
  15   3  10  142.29   11.70
  17  -3  10    0.80    3.90
 -17  -3 -10   -1.40    3.90
 -17   3 -10   -1.20    3.70
  17   3  10   -3.10    4.00
 -28   4  10  234.68   15.10
 -26   4  10   76.79    8.90
 -24  -4  10   24.90    5.70
 -24   4  10   21.10    4.10
 -22  -4  10   54.39    8.90
 -22   4  10   31.40    4.50
 -20  -4  10   10.30    4.20
 -20   4  10   14.60    3.50
 -18  -4  10  293.77   16.60
 -18   4  10  311.17   15.50
 -16  -4  10  503.95   23.80
 -16   4  10  522.55   23.10
 -16   4  10  519.35   22.60
 -14  -4  10  876.41   37.30
 -14   4  10  899.31   36.70
 -14   4  10  873.51   36.60
 -12  -4  10  625.24   27.40
 -12   4  10  628.44   27.20
 -12   4  10  619.54   26.80
 -10  -4  10  487.85   22.00
 -10   4  10  485.85   22.20
 -10   4  10  482.75   21.50
   8  -4 -10   28.20   12.40
  -8  -4  10   35.50    5.80
  -8   4  10   19.10    3.20
  -8   4  10   22.40    3.90
  -6  -4  10  309.37   15.10
  -6   4  10  302.17   14.60
  -6   4  10  304.87   15.70
  -4  -4  10  904.21   37.10
   4  -4 -10  842.62   56.89
  -4   4  10  928.11   38.00
  -4   4  10  915.11   36.60
  -2  -4  10 1102.49   44.60
   2  -4 -10 1005.50   65.39
  -2   4  10 1141.69   44.40
  -2   4  10 1149.98   45.90
   0  -4  10  257.07   11.60
   0  -4  10  255.07   13.60
   0   4 -10  274.47   11.90
   0   4  10  279.27   15.20
   0   4  10  262.87   13.40
   2  -4  10   47.60    4.60
   2  -4  10   48.30    6.80
   2   4  10   45.50    6.40
   2   4  10   52.39    8.30
  -2   4 -10   48.80    4.70
   4  -4  10  131.09    8.10
   4  -4  10  135.49    9.80
  -4   4 -10  157.78    8.80
  -4   4 -10  185.78   37.40
   4   4  10  154.58   11.90
   4   4  10  142.79    9.60
   6  -4  10  140.79    8.80
   6  -4  10  144.49   10.40
  -6   4 -10  143.99   41.00
  -6   4 -10  162.18    9.40
   6   4  10  146.79   10.30
   6   4  10  163.58   12.70
   8  -4  10  731.03   31.50
   8   4  10  762.02   35.00
   8   4  10  770.52   32.70
  -8   4 -10  785.82   32.50
  10  -4  10  303.97   15.80
 -10   4 -10  326.97   16.80
  10   4  10  335.77   16.90
  10   4  10  321.77   19.30
  12  -4  10  141.89   10.50
  12   4  10  170.48   11.70
 -12   4 -10  151.18   11.50
  12   4  10  151.18   14.50
 -14  -4 -10   88.59   10.40
  14  -4  10   83.19    9.10
  14   4  10  102.09   10.40
 -14   4 -10   79.99    9.70
  14   4  10   66.89   12.70
 -16  -4 -10    0.40   15.00
  16  -4  10   -1.30    3.60
 -16  -4 -10    1.80    4.00
 -16   4 -10   -3.90    3.50
  16   4  10   -2.50    4.00
 -16   4 -10   -2.70   17.40
 -27   5  10   12.00    4.30
 -25  -5  10    9.10    6.50
 -25   5  10    8.10    3.90
 -23  -5  10    5.90    4.70
 -23   5  10    3.40    3.60
 -21  -5  10   28.30    5.40
 -21   5  10   23.50    4.50
 -19   5  10   22.90    4.10
 -17  -5  10    2.60    3.80
 -17   5  10   -3.10    2.80
 -15  -5  10   55.59    8.60
 -15   5  10   64.59    7.40
 -15   5  10   41.10    5.10
 -13  -5  10   50.29    8.30
 -13   5  10   66.99    7.50
 -13   5  10   68.69    8.00
 -11  -5  10   17.60    4.00
 -11   5  10   15.10    3.40
 -11   5  10   21.20    4.10
   9  -5 -10   90.79   28.50
  -9  -5  10  111.49    9.40
  -9   5  10  118.09    8.90
  -9   5  10  132.19    9.90
  -7  -5  10   92.29    8.80
  -7   5  10  113.59    9.40
  -7   5  10  110.29    8.30
  -5  -5  10   -1.10    2.80
   5  -5 -10   24.30   14.70
  -5   5  10    6.80    3.20
  -5   5  10    4.80    2.80
  -3  -5  10    6.50    3.10
  -3   5  10   11.30    3.50
  -3   5  10   10.10    3.10
   1  -5 -10   -5.10   14.60
  -1  -5  10   -4.20    2.50
  -1   5  10    1.80    3.10
  -1   5  10    1.30    2.70
   1  -5  10   97.19    8.00
   1   5  10   98.89    8.00
   1   5  10  101.59   10.10
   3  -5  10  123.49    9.20
   3   5  10  138.99    9.50
   3   5  10  142.49   12.00
   5  -5  10  294.17   15.60
  -5   5 -10  333.27   15.80
   5   5  10  331.47   16.20
   5   5  10  315.47   18.90
   7  -5  10  161.18    9.70
   7   5  10  155.18   13.90
   7   5  10  167.88   11.10
  -7   5 -10  181.48   10.40
   9  -5  10   92.19    7.70
   9   5  10   85.09   11.60
   9   5  10   94.39    9.30
  -9   5 -10   82.69    8.10
  11  -5  10   27.30    4.00
  11   5  10   25.30    6.40
 -11   5 -10   22.70    4.20
  11   5  10   26.90    4.80
 -13  -5 -10   -0.50   14.70
  13  -5  10    1.30    3.30
 -13   5 -10   -1.10    3.40
  13   5  10   -3.10    5.10
 -13   5 -10   -9.20   16.80
  13   5  10    7.90    4.10
 -15  -5 -10   -0.10   15.00
  15  -5  10    3.00    3.60
  15   5  10    5.40    4.20
 -15   5 -10   -5.40   17.90
  15   5  10    0.20    5.80
 -15   5 -10    0.80    3.90
 -17  -5 -10   -3.40   15.20
  17  -5  10    1.90    4.10
 -17   5 -10   -7.20   18.70
 -17   5 -10   -0.60    4.30
  17   5  10    0.20    4.40
 -26   6  10   65.99    9.40
 -24  -6  10   28.10    6.10
 -24   6  10   20.10    4.50
 -22  -6  10   12.90    5.20
 -22   6  10    9.10    4.10
 -20  -6  10  186.18   14.20
 -20   6  10  176.78   12.30
 -18  -6  10  961.80   42.40
 -18   6  10  969.30   40.80
 -16  -6  10  331.07   18.70
 -16   6  10  341.37   17.40
 -14  -6  10  622.74   29.30
 -14   6  10  656.63   28.70
 -14   6  10  637.34   28.30
 -12  -6  10  867.91   38.20
 -12   6  10  876.51   37.30
 -12   6  10  927.11   38.20
 -10  -6  10  226.18   14.00
 -10   6  10  226.08   12.90
 -10   6  10  230.18   13.80
  -8  -6  10  169.78   12.00
  -8   6  10  191.38   12.40
  -8   6  10  181.28   11.00
  -6   6  10  128.59   10.60
  -6   6  10  120.69    9.30
  -4  -6  10  142.29   10.30
  -4   6  10  148.49   10.10
  -4   6  10  159.08   11.70
  -2  -6  10  464.35   21.80
  -2   6  10  486.25   21.80
  -2   6  10  490.35   23.80
   0  -6  10  297.07   15.50
   0   6  10  321.17   15.90
   0   6  10  317.77   18.20
   2  -6  10  152.68   10.30
   2   6  10  169.58   13.80
   2   6  10  178.58   11.00
   4  -6  10   17.20    3.50
  -4  -6 -10    4.60   16.60
   4   6  10   15.40    3.70
   4   6  10   13.80    5.50
   6   6  10  255.37   13.90
   6   6  10  220.38   17.10
   8   6  10 1308.77   53.29
   8   6  10 1303.17   57.09
  10   6  10  479.85   27.20
  10   6  10  501.45   23.70
  12   6  10  317.67   21.40
  12   6  10  318.37   18.10
  14   6  10  153.98   12.70
  14   6  10  143.09   16.10
 -16  -6 -10   -6.90   14.90
  16   6  10   -7.70    5.70
  16   6  10    4.50    4.40
 -25  -7  10   11.50    6.00
 -25   7  10   15.00    4.40
  25   7 -10    0.60    8.60
 -23  -7  10    3.50    5.30
 -23   7  10   -0.30    3.40
 -21  -7  10   60.49   11.30
 -21   7  10   31.70    5.10
 -19  -7  10  748.23   35.50
 -19   7  10  758.82   33.30
 -17  -7  10  923.31   40.90
 -17   7  10  893.31   38.80
 -15  -7  10  845.62   38.50
 -15   7  10  879.31   37.10
 -13  -7  10  404.36   21.60
 -13   7  10  428.66   21.40
 -13   7  10  416.56   20.50
 -11  -7  10 1278.57   55.09
 -11   7  10 1378.56   55.29
 -11   7  10 1339.07   54.19
  -9  -7  10   51.99    8.90
  -9   7  10   63.39    8.30
  -9   7  10   70.09    9.30
  -7  -7  10   -4.50    3.60
  -7   7  10    6.50    3.80
  -7   7  10    5.80    3.30
  -5  -7  10   96.29    9.80
  -5   7  10  135.59   11.40
  -5   7  10  131.09    9.70
  -3  -7  10  269.07   15.40
  -3   7  10  300.47   15.40
  -3   7  10  298.57   17.70
  -1  -7  10  205.58   12.70
  -1   7  10  232.78   16.00
  -1   7  10  230.08   13.00
   1  -7  10   44.30    6.90
   1   7  10   30.10    4.50
   1   7  10   33.50    6.30
  -3  -7 -10   -3.80   15.90
   3  -7  10   11.70    3.30
   3   7  10    7.70    5.60
   3   7  10   10.00    3.50
  -5  -7 -10   10.50   17.20
   5  -7  10   24.10    5.70
   5   7  10   25.40    4.40
   5   7  10   20.20    6.20
   7   7  10 1016.40   43.10
   7   7  10 1050.09   48.00
   9   7  10  963.80   45.60
   9   7  10  950.10   40.70
  11   7  10  483.95   28.50
  11   7  10  475.75   23.50
  13   7  10  279.07   16.20
  13   7  10  235.98   20.50
  15   7  10   43.60    9.00
 -24  -8  10    6.10    6.20
  24   8 -10    0.20    9.10
 -24   8  10   11.20    4.50
 -22  -8  10   43.20    8.00
 -22   8  10   60.99    9.40
 -20  -8  10   94.79   13.40
 -20   8  10   86.49   10.10
 -18  -8  10  250.07   18.40
 -18   8  10  265.07   15.60
 -16  -8  10  241.08   16.90
 -16   8  10  242.38   14.60
 -14  -8  10   84.29   11.10
 -14   8  10   61.49    9.10
 -12  -8  10   71.99   10.50
 -12   8  10   58.19    8.60
 -12   8  10   45.00    6.50
 -10  -8  10  409.46   21.90
 -10   8  10  422.16   22.40
 -10   8  10  424.76   20.70
   8  -8 -10    0.50   15.80
  -8  -8  10   26.20    5.10
  -8   8  10   16.80    4.20
  -8   8  10   18.50    5.30
  -6  -8  10  199.58   13.30
  -6   8  10  191.18   12.80
  -6   8  10  194.18   14.80
  -4  -8  10   26.30    4.80
  -4   8  10   23.70    4.50
  -4   8  10   30.80    6.10
  -2  -8  10   13.20    4.00
   2  -8 -10  -10.70   17.20
  -2   8  10    9.80    5.40
  -2   8  10   13.20    4.00
   0  -8  10   70.09    8.60
   0   8  10   73.39   12.50
   0   8  10   84.09    9.20
  -2  -8 -10   16.70   19.30
   2  -8  10   13.50    3.70
   2   8  10    9.50    6.00
   2   8  10    8.40    4.00
  -4  -8 -10   14.90   18.70
   4   8  10   13.80    6.50
   4   8  10   12.30    4.10
  -6  -8 -10   -5.40   17.20
   6   8  10   18.00    4.30
   6   8  10   13.90    6.70
   8   8  10  233.78   14.50
   8   8  10  228.48   20.20
  10   8  10  120.19   16.60
  12   8  10  187.88   13.40
  12   8  10  157.18   19.00
 -23  -9  10  123.39   15.40
 -23   9  10  128.59   12.00
 -21  -9  10   22.50    7.30
  21   9 -10    8.50   10.20
 -21   9  10   25.90    5.30
 -19  -9  10   14.20    6.90
 -19   9  10    8.60    4.20
 -17  -9  10   -1.50    5.40
 -17   9  10   -3.70    3.40
 -15  -9  10   25.50    6.30
 -15   9  10   28.40    4.80
 -13  -9  10   15.90    5.40
 -13   9  10   19.50    4.30
 -11  -9  10    3.40    4.70
 -11   9  10   -7.60    4.30
 -11   9  10    0.10    3.40
  -9  -9  10   32.00    6.00
  -9   9  10   25.60    4.90
  -9   9  10   27.60    6.10
  -7  -9  10  280.07   16.90
  -7   9  10  255.57   18.30
  -7   9  10  261.77   15.40
  -5  -9  10  721.03   32.40
  -5   9  10  718.13   31.30
  -5   9  10  675.93   34.70
  -3  -9  10  958.40   40.90
  -3   9  10  935.81   44.40
  -3   9  10  940.91   40.00
  -1  -9  10  736.13   32.50
  -1   9  10  709.33   36.80
  -1   9  10  723.03   32.00
   1  -9  10  357.16   18.60
   1   9  10  331.37   18.30
   1   9  10  352.26   23.70
   3   9  10  114.19   10.70
   3   9  10  116.39   16.20
  -5  -9 -10  -17.30   18.70
   5   9  10    6.20    6.70
   5   9  10   10.10    4.30
  -7  -9 -10  -22.40   21.50
   7   9  10   -3.50    6.60
   7   9  10    5.00    3.80
  -9  -9 -10  -17.80   20.90
   9   9  10    0.90    3.90
   9   9  10  -12.00    6.30
  11   9  10    1.00    7.90
  11   9  10   14.30    4.70
 -20 -10  10    5.60    6.60
  20  10 -10    2.30    9.90
 -20  10  10    5.20    4.10
 -18 -10  10   16.20    7.00
  18  10 -10   -3.50   10.70
 -18  10  10   21.20    4.80
 -16 -10  10  157.58   16.00
 -16  10  10  162.18   12.60
 -14 -10  10  102.39   13.90
 -14  10  10  112.19   10.70
 -12 -10  10   33.10    6.60
 -12  10  10   35.40    5.40
 -10 -10  10    3.80    5.00
 -10  10  10    1.60    3.70
 -10  10  10   -7.80    4.70
  -8 -10  10   68.69   11.00
  -8  10  10   56.29    8.80
  -8  10  10   34.30    7.30
  -6 -10  10  572.74   28.20
  -6  10  10  565.34   26.20
  -6  10  10  543.35   30.40
  -4 -10  10  777.52   35.80
  -4  10  10  795.62   34.30
  -4  10  10  754.22   39.10
  -2 -10  10 1081.39   45.30
  -2  10  10 1015.10   43.70
  -2  10  10 1012.40   49.70
   0 -10  10  814.92   36.20
   0  10  10  815.22   35.30
   0  10  10  773.32   41.60
   2  10  10  306.17   24.60
   2  10  10  320.57   17.60
  -4 -10 -10  -25.20   25.70
   4  10  10   -0.50    7.30
   4  10  10   -0.80    4.00
  -6 -10 -10  -23.90   25.60
   6  10  10   20.90    9.00
   8  10  10   20.90    9.10
   8  10  10   30.30    5.30
 -10 -10 -10  -13.80   23.90
  10  10  10   21.30    9.70
  19  11 -10   -5.80   10.40
 -17 -11  10    3.30    6.50
 -17  11  10   -1.90    3.80
  17  11 -10  -11.30   10.40
 -15 -11  10    2.80    6.40
 -15  11  10    5.50    4.10
  15  11 -10  -19.00   10.30
 -13 -11  10   18.20    7.00
 -13  11  10   17.60    4.90
 -11 -11  10    1.00    5.80
 -11  11  10   -0.30    3.80
  -9 -11  10    2.40    5.60
  -9  11  10   -5.70    3.80
  -7 -11  10  193.38   16.00
  -7  11  10  165.58   17.80
  -7  11  10  190.38   13.50
  -5 -11  10  241.18   17.40
  -5  11  10  246.98   15.30
  -5  11  10  221.98   20.20
  -3 -11  10  282.97   18.40
  -3  11  10  278.07   16.50
  -3  11  10  250.77   22.40
  -1 -11  10  151.08   14.00
  -1  11  10  121.69   18.30
  -1  11  10  133.09   11.70
   1  11  10   49.30   10.90
  -3 -11 -10  -14.00   24.00
   3  11  10   19.40    4.80
   3  11  10    4.80    8.80
  -5 -11 -10   -5.50   30.80
   5  11  10    2.20    8.80
   5  11  10   15.00    4.70
  -7 -11 -10  -14.30   26.70
   7  11  10   -5.90    4.00
   7  11  10  -13.60    8.20
 -14 -12  10  118.79   16.10
 -14  12  10  121.29   12.10
 -12 -12  10  139.79   16.50
 -12  12  10  142.09   12.70
 -10 -12  10    6.10    6.30
 -10  12  10    7.00    4.80
  -8 -12  10   -3.20    5.60
  -8  12  10   -9.00    3.90
  -6 -12  10   16.20    6.30
  -6  12  10    6.10    4.60
  -6  12  10    4.60    7.40
  -4 -12  10   11.30    5.60
   4 -12 -10  -10.90   27.00
  -4 -12  10  -15.30   16.30
  -4  12  10  -10.10    6.70
  -4  12  10   -0.90    4.10
   2 -12 -10  -10.00   25.40
  -2 -12  10   -6.30   17.70
  -2  12  10   12.20    4.80
  -2  12  10   -1.20    7.80
   0 -12 -10  -26.60   31.90
   0  12  10  -10.10    7.60
   0  12  10    1.00    4.20
  -2 -12 -10   -7.70   34.00
   2  12  10  -12.40    8.20
   2  12  10    2.60    4.50
   7  13 -10   -7.80   10.10
   5  13 -10   42.90   13.30
 -28   0  11   -6.60    3.30
 -26   0  11   -1.40    3.30
 -24   0  11   -3.20    2.80
 -22   0  11   -3.60    2.50
 -20   0  11   -3.00    2.60
 -20   0  11   -2.00    2.10
 -18   0  11   -0.90    2.00
 -18   0  11   -1.10    2.60
 -16   0  11    0.40    2.60
 -16   0  11   -1.30    1.70
 -14   0  11    0.60    1.60
 -14   0  11    1.00    2.50
 -12   0  11    3.10    1.70
 -12   0  11    0.80    2.50
 -10   0  11    1.10    1.70
 -10   0  11   -0.80    2.40
  -8   0  11   -1.20    1.60
  -8   0  11   -0.40    2.40
  -6   0  11    2.30    1.80
   6   0 -11    2.70   10.40
  -6   0  11    1.50    2.50
   4   0 -11    8.60   12.60
  -2   0  11    4.00    2.00
   2   0 -11    3.90   14.40
  -2   0  11    4.80    3.00
   0   0  11    3.90    2.10
   0   0  11    6.90    3.40
   0   0 -11   -9.00   15.40
   2   0  11    2.00    2.20
   2   0  11    3.20    3.40
  -2   0 -11   -5.50   17.00
   4   0  11    2.30    2.30
   4   0  11    2.80    3.50
  -4   0 -11  -11.40   17.80
  -6   0 -11    1.80    2.40
   6   0  11    1.40    3.80
  -6   0 -11   -8.50   18.80
   6   0  11    1.50    2.50
   8   0  11    2.10    4.00
   8   0  11   -0.30    2.70
  -8   0 -11    1.80    2.60
  -8   0 -11   -0.70   19.00
  10   0  11    0.50    4.00
  10   0  11   -0.60    2.90
 -10   0 -11   -1.50    2.70
 -10   0 -11  -10.20   17.80
  12   0  11   -5.40    3.20
 -12   0 -11   -0.90    3.30
 -12   0 -11   -7.70   18.70
 -14   0 -11  -17.40   18.60
  14   0  11   -0.60    3.60
 -14   0 -11    1.10    3.60
 -16   0 -11   -1.00    3.70
 -16   0 -11  -13.50   15.50
  16   0  11   -0.40    3.80
 -29   1  11   33.30    5.40
 -25  -1  11   24.70    3.90
 -25   1  11   18.40    4.10
 -23  -1  11  306.57   15.00
 -23   1  11  303.97   15.50
 -21  -1  11  583.64   25.00
 -21  -1  11  589.24   26.20
 -21   1  11  591.24   25.40
 -19  -1  11  850.21   35.30
 -19  -1  11  884.01   36.70
 -19   1  11  890.81   35.90
 -19   1  11  883.21   36.30
 -17  -1  11  618.34   26.10
 -17  -1  11  560.94   24.40
 -17   1  11  596.44   25.70
 -17   1  11  605.34   25.10
 -15  -1  11  167.68    8.70
 -15  -1  11  178.08   10.60
 -15   1  11  176.58   10.30
 -15   1  11  177.08    9.40
 -13  -1  11    0.50    1.50
 -13  -1  11    2.30    2.60
 -13   1  11   -0.20    2.40
 -13   1  11    2.90    2.00
 -11  -1  11  500.85   21.90
 -11  -1  11  476.85   20.20
 -11   1  11  485.25   21.90
 -11   1  11  513.75   21.00
  -9  -1  11  187.08    8.90
  -9  -1  11  184.88   10.80
  -9   1  11  188.88   10.90
  -9   1  11  191.38    9.70
  -7  -1  11  954.20   38.20
  -7  -1  11  907.31   36.50
  -7   1  11  912.81   37.00
  -7   1  11  938.61   38.20
  -5  -1  11  234.48   12.50
  -5  -1  11  219.78   10.50
  -5   1  11  246.78   12.70
  -5   1  11  222.98   11.20
  -3  -1  11   77.39    7.70
  -3  -1  11   82.49    5.80
  -3   1  11   97.69    6.60
  -3   1  11   88.89    8.00
  -1  -1  11  113.49    9.10
  -1  -1  11  115.89    7.10
  -1   1  11  121.89    7.70
  -1   1  11  129.59    9.50
   1  -1  11  633.84   27.00
   1  -1  11  612.34   25.50
   1   1  11  643.04   27.60
  -1   1 -11  535.45   49.20
   1   1  11  643.14   26.00
   3  -1  11  880.71   36.30
   3  -1  11  881.81   37.60
   3   1  11  909.91   38.30
  -3   1 -11  917.01   37.00
   3   1  11  905.61   36.70
   5  -1  11 1078.89   44.70
   5  -1  11 1066.89   43.50
   5   1  11 1063.79   43.80
   5   1  11 1086.79   45.40
  -5   1 -11 1114.29   44.40
  -7  -1 -11  564.24   25.00
   7  -1  11  552.84   25.30
   7  -1  11  538.25   23.80
   7   1  11  509.35   24.00
   7   1  11  541.45   25.90
  -7   1 -11  565.74   24.70
   9  -1  11  242.48   15.00
  -9  -1 -11  246.78   14.40
   9  -1  11  250.97   13.40
  -9   1 -11  250.47   14.00
   9   1  11  248.28   13.70
   9   1  11  241.48   15.60
  11  -1  11   19.10    3.70
 -11  -1 -11   13.90    3.70
 -11  -1 -11  -16.10   18.70
  11   1  11    7.90    4.80
  11   1  11   12.70    3.80
 -11   1 -11  -13.20   19.30
 -11   1 -11   16.10    3.70
  13  -1  11    5.20    3.70
 -13  -1 -11    7.30    3.70
 -13  -1 -11    2.40   19.20
  13   1  11   10.00    3.80
 -13   1 -11    2.10    3.30
 -13   1 -11  -19.40   20.00
  15  -1  11  135.89   11.70
 -15  -1 -11  153.08   12.40
  15   1  11  163.68   12.10
 -15   1 -11  135.19   12.30
  17  -1  11   60.19    9.50
 -17  -1 -11   33.50    5.80
 -17   1 -11   33.80    5.80
 -28   2  11   -2.90    3.60
 -26   2  11   -3.00    3.10
 -24   2  11  288.87   15.30
 -22  -2  11  492.15   23.50
 -22   2  11  514.35   22.70
 -20  -2  11 1747.73   69.49
 -20   2  11 1731.63   68.69
 -18  -2  11 1062.89   46.00
 -18  -2  11 1142.99   46.50
 -18   2  11 1172.28   45.80
 -18   2  11 1147.09   45.70
 -16  -2  11  823.02   35.40
 -16  -2  11  931.01   37.60
 -16   2  11  931.51   36.80
 -16   2  11  909.11   37.00
 -14  -2  11   60.79    4.70
 -14  -2  11   74.89    7.70
 -14   2  11   73.89    7.30
 -14   2  11   77.89    6.60
 -12  -2  11   41.70    6.30
 -12  -2  11   29.40    3.40
 -12   2  11   39.90    6.30
 -12   2  11   43.10    5.40
 -10  -2  11 1024.40   41.10
 -10  -2  11  961.20   39.00
 -10   2  11 1030.80   40.40
 -10   2  11 1003.50   41.10
  -8  -2  11  844.22   34.60
  -8  -2  11  795.62   32.60
  -8   2  11  852.11   34.90
  -8   2  11  844.32   33.90
  -6  -2  11  100.99    6.30
   6  -2 -11  107.19   29.20
  -6  -2  11  126.49    8.70
  -6   2  11  122.19    7.70
  -6   2  11  137.29    9.20
  -4  -2  11   21.50    3.60
  -4  -2  11   31.50    3.80
  -4   2  11   32.10    5.20
  -4   2  11   23.60    4.00
  -2  -2  11  301.97   15.20
  -2  -2  11  290.27   13.10
  -2   2  11  311.17   15.90
  -2   2  11  293.07   14.00
   0  -2  11  865.11   35.60
   0  -2  11  829.02   33.90
   0   2 -11  767.42   56.69
   0   2  11  915.11   36.50
   0   2  11  858.21   34.70
   2  -2  11  405.96   18.30
  -2  -2 -11  466.85   50.79
   2  -2  11  413.66   20.00
   2   2  11  411.36   19.10
  -2   2 -11  437.76   19.00
   2   2  11  436.56   21.10
   4  -2  11 1357.36   55.49
   4  -2  11 1375.56   56.69
   4   2  11 1414.16   56.19
  -4   2 -11 1463.25   56.29
   4   2  11 1431.96   57.89
   6  -2  11 1541.55   62.29
   6  -2  11 1535.15   61.19
   6   2  11 1564.94   63.59
  -6   2 -11 1603.04   62.19
   6   2  11 1517.15   61.69
   8  -2  11 1034.70   43.00
   8  -2  11 1064.59   44.00
  -8   2 -11 1065.39   43.90
   8   2  11 1048.30   43.50
   8   2  11 1067.09   45.40
  10  -2  11  226.08   12.90
 -10  -2 -11  226.38   14.10
  10   2  11  241.78   13.70
  10   2  11  222.78   15.90
 -10   2 -11  231.48   13.70
 -12  -2 -11   32.00    5.10
  12  -2  11   31.80    4.70
 -12   2 -11   30.20    5.00
  12   2  11   36.50    5.10
  12   2  11   23.50    6.10
  14  -2  11   67.89    8.70
 -14  -2 -11   62.09    9.60
 -14   2 -11   66.59    9.30
  14   2  11   81.99    9.60
 -16  -2 -11   90.29   10.90
  16  -2  11   85.49   10.00
  16   2  11  104.19   11.00
 -16   2 -11   80.99   10.50
 -29   3  11   -4.60    3.60
 -27   3  11   -0.60    3.50
 -25   3  11   22.80    4.30
 -23  -3  11  147.39   11.40
 -23   3  11  140.39   10.30
 -21  -3  11  221.28   14.00
 -21   3  11  240.58   13.10
 -19  -3  11  561.44   26.00
 -19   3  11  581.34   25.30
 -17  -3  11  261.07   14.60
 -17   3  11  252.57   13.80
 -17   3  11  258.87   13.40
 -15  -3  11  202.58   12.00
 -15   3  11  192.78   11.50
 -15   3  11  197.58   11.60
 -13  -3  11  236.68   13.10
 -13   3  11  230.48   13.00
 -13   3  11  238.78   12.70
 -11  -3  11   45.60    6.70
 -11   3  11   45.80    7.10
 -11   3  11   43.60    6.20
  -9  -3  11   14.90    3.20
  -9   3  11   14.90    2.90
  -9   3  11   14.20    3.40
  -7  -3  11   15.70    3.20
   7  -3 -11    1.00   12.50
  -7   3  11   14.40    3.60
  -7   3  11   12.20    2.70
  -5  -3  11   13.40    3.20
  -5   3  11   14.80    2.80
  -5   3  11   18.50    3.80
  -3  -3  11  259.47   14.30
   3  -3 -11  342.07   40.70
  -3   3  11  274.87   13.80
  -3   3  11  280.47   15.40
   1  -3 -11  229.28   42.10
  -1  -3  11  274.97   12.20
  -1  -3  11  274.37   14.40
  -1   3  11  294.57   15.50
  -1   3  11  266.47   13.50
   1  -3  11  618.84   27.10
   1  -3  11  584.64   25.30
   1   3  11  620.24   26.50
   1   3  11  645.24   28.40
  -1   3 -11  634.04   25.80
   3  -3  11  364.66   18.40
   3  -3  11  361.76   16.60
   3   3  11  396.86   20.00
  -3   3 -11  388.86   17.20
   3   3  11  363.16   17.70
   5  -3  11  362.46   18.60
   5  -3  11  354.56   16.80
   5   3  11  361.96   18.10
   5   3  11  383.06   20.30
  -5   3 -11  400.66   17.70
   7  -3  11  302.57   14.70
   7  -3  11  297.67   16.40
   7   3  11  300.37   15.80
  -7   3 -11  307.57   15.50
   7   3  11  297.47   18.30
   9  -3  11  119.29    9.40
   9   3  11  122.89   12.80
  -9   3 -11  126.89   10.10
   9   3  11  140.69   10.30
  11  -3  11  101.39    9.40
  11   3  11  108.09   12.80
  11   3  11  128.89   10.40
 -11   3 -11  100.69   10.10
 -13  -3 -11  115.19   11.50
  13  -3  11  116.49   10.20
 -13   3 -11  114.79   10.70
  13   3  11  144.49   11.40
  13   3  11  104.09   13.50
 -15  -3 -11  130.79   12.60
  15  -3  11  154.18   11.60
  15   3  11  155.98   12.40
 -15   3 -11  139.59   12.30
  17  -3  11   12.10    4.50
 -17  -3 -11  -11.10   16.00
 -17  -3 -11   13.40    5.10
  17   3  11   11.30    4.70
 -17   3 -11    7.50    4.40
 -17   3 -11  -19.00   18.30
 -28   4  11  111.99   11.10
 -26   4  11    9.40    3.90
 -24  -4  11   -1.60    4.00
 -24   4  11   -3.40    3.00
 -22  -4  11    4.00    3.90
 -22   4  11    4.50    3.20
 -20  -4  11   78.39    9.40
 -20   4  11   80.69    8.00
 -18  -4  11   31.60    5.10
 -18   4  11   28.50    4.30
 -16  -4  11   -3.80    3.40
 -16   4  11   -1.50    2.80
 -16   4  11   -0.40    2.90
 -14  -4  11  310.67   16.30
 -14   4  11  304.27   15.80
 -14   4  11  301.57   15.60
 -12  -4  11  329.07   16.70
 -12   4  11  318.77   16.20
 -12   4  11  332.87   16.80
 -10  -4  11  828.02   35.50
 -10   4  11  839.22   35.10
 -10   4  11  865.51   36.00
  -8  -4  11 1297.67   52.79
  -8   4  11 1289.07   52.29
  -8   4  11 1342.87   53.49
  -6  -4  11 1302.07   52.19
  -6   4  11 1269.27   51.69
  -6   4  11 1312.57   52.99
  -4  -4  11 1831.42   73.89
  -4   4  11 1883.41   73.49
  -4   4  11 1909.81   74.99
  -2  -4  11  612.34   26.70
  -2   4  11  598.64   26.40
  -2   4  11  629.54   28.00
   0  -4 -11  -10.20   15.80
   0  -4  11   -3.10    2.90
   0   4  11   -0.40    2.70
   0   4  11    2.70    3.40
   2  -4  11   57.09    8.00
  -2   4 -11   47.30   18.70
   2   4  11   71.19    7.60
   2   4  11   73.99    9.70
  -2   4 -11   64.29    5.80
   4  -4  11  296.87   14.40
   4  -4  11  304.37   16.10
   4   4  11  318.77   18.30
   4   4  11  315.77   15.90
  -4   4 -11  321.17   15.10
   6  -4  11   -1.50    3.30
   6  -4  11    3.40    2.30
   6   4  11    0.90    3.10
   6   4  11    3.00    4.50
  -6   4 -11    3.90    2.30
  -8  -4 -11   -7.70   17.90
   8  -4  11   15.30    3.30
  -8   4 -11   17.20    3.60
  -8   4 -11   -6.90   18.70
   8   4  11   16.90    5.30
  10  -4  11  173.38   11.10
  10   4  11  173.08   14.90
  10   4  11  181.38   12.10
 -10   4 -11  174.78   11.90
  12  -4  11  226.28   13.70
  12   4  11  239.78   14.50
 -12   4 -11  233.98   14.70
  12   4  11  234.48   17.60
  14  -4  11  347.27   18.80
 -14   4 -11  372.06   20.10
  14   4  11  374.16   19.80
  14   4  11  360.36   22.80
 -27   5  11   67.59    9.50
 -25  -5  11    2.40    4.70
 -25   5  11    1.40    3.40
 -23  -5  11   24.80    5.60
 -23   5  11   24.10    4.30
 -21  -5  11  204.98   14.60
 -21   5  11  207.88   12.80
 -19  -5  11  205.78   14.00
 -19   5  11  209.48   12.70
 -17  -5  11   87.79    9.60
 -17   5  11   86.39    8.50
 -15  -5  11   -3.20    3.30
 -15   5  11   -3.90    2.80
 -15   5  11   -4.70    3.30
 -13  -5  11  629.94   28.80
 -13   5  11  655.03   28.70
 -13   5  11  651.23   28.20
 -11  -5  11 2105.09   84.99
 -11   5  11 2240.28   85.39
 -11   5  11 2111.99   84.39
  -9  -5  11 2118.49   84.29
  -9   5  11 2177.78   84.89
  -9   5  11 2117.79   83.69
  -7  -5  11 2324.37   92.39
  -7   5  11 2400.06   93.19
  -7   5  11 2348.17   91.99
  -5  -5  11 1516.05   61.89
  -5   5  11 1559.24   61.59
  -5   5  11 1569.54   62.99
  -3  -5  11  371.86   18.50
  -3   5  11  380.36   18.50
  -3   5  11  406.16   20.10
  -1  -5  11   37.00    6.80
  -1   5  11   37.10    4.60
  -1   5  11   47.60    8.70
   1  -5  11  117.59    9.60
   1   5  11  133.89   11.80
   1   5  11  126.99    9.40
   3  -5  11  176.88   11.70
   3   5  11  192.48   14.30
   3   5  11  188.38   11.90
   5  -5  11   21.20    3.80
   5   5  11   22.50    3.90
   5   5  11   17.70    5.50
   7   5  11  191.78   11.80
   7   5  11  160.78   14.60
   9   5  11   22.80    6.30
  11   5  11   70.79   12.60
  11   5  11   78.29    9.80
 -11   5 -11   53.59   23.80
  13   5  11  384.06   24.10
  13   5  11  416.46   21.20
 -13   5 -11  411.46   26.00
 -26  -6  11   14.70    7.10
  26   6 -11    6.50    9.50
 -26   6  11   12.10    4.40
 -24  -6  11    4.70    5.00
 -24   6  11   -0.10    3.60
 -22  -6  11    5.90    4.70
 -22   6  11    0.60    3.60
 -20  -6  11   54.39    9.90
 -20   6  11   35.30    5.00
 -18  -6  11  136.09   12.30
 -18   6  11  133.59   10.90
 -16  -6  11   93.49   10.70
 -16   6  11   96.49    9.50
 -14  -6  11  274.97   16.00
 -14   6  11  268.87   15.90
 -14   6  11  266.87   15.10
 -12  -6  11  151.68   11.80
 -12   6  11  150.18   10.90
 -12   6  11  150.48   12.40
 -10  -6  11  573.44   27.30
 -10   6  11  597.54   26.70
 -10   6  11  630.94   27.90
  -8  -6  11  507.45   24.30
  -8   6  11  532.25   25.00
  -8   6  11  529.95   23.80
  -6  -6  11 1082.59   45.60
  -6   6  11 1112.69   45.20
  -6   6  11 1114.69   46.70
  -4  -6  11  749.42   32.90
  -4   6  11  765.12   34.40
  -4   6  11  785.92   32.80
  -2  -6  11  291.97   15.90
  -2   6  11  318.87   16.10
  -2   6  11  314.27   18.10
   0  -6  11   51.79    7.50
   0   6  11   61.49   10.00
   0   6  11   55.79    8.00
  -2  -6 -11  -10.80   16.10
   2  -6  11    0.10    2.90
   2   6  11   -2.00    3.00
   2   6  11   -1.40    4.20
   4  -6  11  251.07   13.40
   4   6  11  239.78   14.00
   4   6  11  241.88   17.20
   6   6  11   51.69    7.90
   6   6  11   74.69    8.70
  -8  -6 -11    4.00   17.60
   8   6  11    0.60    3.40
   8   6  11   -7.30    5.10
  10   6  11   81.39   13.70
  10   6  11  104.49   10.50
  14   6  11   56.19    9.20
  14   6  11   90.69   11.40
 -25  -7  11   21.60    6.80
  25   7 -11    8.70    9.80
 -25   7  11   24.40    5.00
 -23  -7  11  112.99   13.80
 -23   7  11  115.29   10.90
 -21  -7  11  192.18   15.90
 -21   7  11  193.58   13.20
 -19  -7  11  263.57   17.70
 -19   7  11  262.07   15.60
 -17  -7  11  359.26   20.40
 -17   7  11  342.27   18.50
 -15  -7  11    3.10    4.40
 -13  -7  11   50.29    9.30
 -13   7  11   33.40    5.70
 -13   7  11   29.00    4.90
 -11  -7  11   26.40    5.10
 -11   7  11   20.50    4.30
 -11   7  11   19.40    5.10
  -9  -7  11   40.60    5.70
  -9   7  11   60.69    8.40
  -9   7  11   60.89    9.80
  -7  -7  11   44.20    5.90
  -7   7  11   66.79    8.50
   5  -7 -11   -5.20   15.40
  -5   7  11   -0.80    3.10
  -5   7  11   -3.20    3.60
  -3  -7  11   -3.00    3.50
   3  -7 -11   -4.00   16.50
  -3   7  11    2.70    3.30
  -3   7  11    4.70    4.40
  -1  -7  11   48.40    7.90
  -1   7  11   43.80    6.90
  -1   7  11   67.19    8.50
   1  -7  11  494.45   23.60
   1   7  11  544.25   24.20
   1   7  11  521.95   27.60
   3  -7  11  348.47   17.40
   3   7  11  354.56   18.10
   3   7  11  346.17   21.80
   5   7  11  180.58   16.40
   5   7  11  174.78   12.40
   7   7  11   75.29   13.90
   7   7  11   78.89   10.10
   9   7  11  220.88   19.00
   9   7  11  204.78   14.10
  11   7  11   -0.70    6.40
  11   7  11    3.50    4.10
 -13  -7 -11  -19.30   19.00
  13   7  11   13.70    4.70
  13   7  11    0.30    6.90
 -24  -8  11   94.39   14.40
 -24   8  11   96.39   10.70
 -22  -8  11  423.16   25.60
 -22   8  11  441.56   22.30
 -20  -8  11  331.57   21.20
 -20   8  11  313.17   17.90
 -18  -8  11  890.01   41.60
 -18   8  11  922.91   39.40
 -16  -8  11  213.58   16.00
 -16   8  11  201.98   13.70
 -14  -8  11   30.00    6.00
 -14   8  11   27.30    5.00
 -12  -8  11  115.99   11.50
 -12   8  11  103.09   10.00
 -12   8  11   84.79   11.80
 -10  -8  11  654.13   30.90
 -10   8  11  674.93   29.90
 -10   8  11  680.53   31.70
  -8  -8  11  296.87   16.80
  -8   8  11  280.17   17.80
  -8   8  11  276.47   15.80
  -6  -8  11  653.23   29.70
  -6   8  11  631.84   31.50
  -6   8  11  675.03   29.30
  -4  -8  11   -5.40    3.40
   4  -8 -11  -12.50   15.60
  -4   8  11   -0.10    4.60
  -4   8  11   -4.60    3.50
  -2   8  11   -1.90    3.50
  -2   8  11   -0.40    4.70
   0  -8  11  123.79   10.50
   0   8  11  141.39   14.90
   0   8  11  133.79   10.90
   2  -8  11  433.46   21.70
   2   8  11  471.15   22.40
   2   8  11  484.45   27.30
   4   8  11  117.49   10.80
   4   8  11  114.99   15.20
   6   8  11  777.92   34.30
   6   8  11  786.52   40.10
  10   8  11  223.78   21.00
  10   8  11  248.78   15.60
 -12  -8 -11  -15.30   19.90
  12   8  11   12.70    4.70
  12   8  11    2.50    7.30
 -23  -9  11   45.10    8.40
  23   9 -11   20.00   11.40
 -21  -9  11  203.98   18.20
 -21   9  11  200.68   14.30
 -19  -9  11  145.19   15.90
 -19   9  11  175.38   12.80
 -17  -9  11  116.49   14.60
 -17   9  11  120.19   11.30
 -15  -9  11    4.10    5.60
 -15   9  11    9.90    4.30
 -13  -9  11   -3.60    4.30
 -13   9  11   -0.10    3.70
 -11  -9  11  101.99   11.50
 -11   9  11   93.49    9.90
 -11   9  11   88.19   12.00
  -9  -9  11  244.28   16.00
  -9   9  11  218.58   16.90
  -9   9  11  253.17   14.90
  -7  -9  11  385.96   20.70
  -7   9  11  399.96   19.70
  -7   9  11  357.96   22.50
  -5  -9  11  222.08   14.90
  -5   9  11  210.98   17.80
  -5   9  11  231.68   14.20
  -3  -9  11  151.78   12.20
  -3   9  11  147.39   15.90
  -3   9  11  147.69   11.80
   1  -9 -11    3.90   19.50
  -1  -9  11   23.50    4.80
  -1   9  11   26.70    7.50
  -1   9  11   15.70    4.50
   1  -9  11   71.69    9.30
   1   9  11   74.59   14.20
   1   9  11   60.99    9.60
   5   9  11  312.57   17.60
   5   9  11  310.07   24.20
   7   9  11  155.58   19.30
   7   9  11  175.58   12.90
  -9  -9 -11  -14.70   19.30
   9   9  11   -3.80    7.20
   9   9  11    4.40    4.30
 -20 -10  11    3.90    6.20
  20  10 -11   -0.60   10.30
 -20  10  11   -2.10    3.70
 -18 -10  11   32.90    7.70
 -18  10  11   39.00    5.70
 -16 -10  11    6.50    6.10
 -16  10  11    4.50    4.30
 -14 -10  11   -2.00    5.50
 -14  10  11   -1.70    3.80
 -12 -10  11    1.90    5.30
 -12  10  11    3.10    3.90
 -10 -10  11    6.30    5.00
 -10  10  11   -3.70    3.50
  -8 -10  11    6.80    4.90
  -8  10  11   -0.40    5.40
  -8  10  11   -0.50    3.90
  -6 -10  11    1.50    4.90
  -6  10  11    0.50    3.70
  -6  10  11   -2.20    5.60
  -4 -10  11    6.00    4.90
   4 -10 -11   -4.70   20.20
  -4  10  11   -1.30    6.00
  -4  10  11    4.60    4.10
  -2 -10  11    5.60    4.70
   2 -10 -11  -10.70   21.00
  -2  10  11    1.60    4.00
  -2  10  11   -0.50    6.70
   0 -10  11   37.10    6.00
   0  10  11   37.80    5.70
   0  10  11   33.70    9.20
   2  10  11   63.49    9.90
   2  10  11   47.60   10.00
  -4 -10 -11  -25.40   25.10
   4  10  11   15.90    8.80
  -6 -10 -11  -18.40   22.40
   6  10  11   10.10    4.60
   6  10  11    1.50    8.10
  -8 -10 -11  -18.40   22.60
   8  10  11   -3.60    4.10
   8  10  11   -9.90    7.50
 -17 -11  11  290.07   21.80
 -17  11  11  308.97   18.30
 -15 -11  11   74.79   13.90
 -15  11  11   82.99   10.80
 -13 -11  11   -4.50    5.70
 -13  11  11   -0.40    4.10
 -11 -11  11   35.30    7.50
 -11  11  11   41.40    5.90
  -9 -11  11  158.58   15.40
  -9  11  11  140.69   16.90
  -9  11  11  164.78   12.80
  -7 -11  11  126.29   13.60
  -7  11  11   93.49   15.70
  -7  11  11  115.59   11.70
  -5 -11  11   21.10    6.00
  -5  11  11   24.00    5.30
  -5  11  11   17.50    7.70
   3 -11 -11   -8.20   23.50
  -3 -11  11   -1.30    4.70
  -3  11  11   -6.60    3.80
  -3  11  11  -11.50    6.40
   1 -11 -11    7.70   29.80
  -1 -11  11   59.09   11.00
  -1  11  11   36.80    5.50
  -1  11  11   25.60    8.90
   1  11  11  238.18   14.90
   1  11  11  175.08   22.20
   3  11  11  212.78   24.30
   3  11  11  258.27   15.90
   5  11  11  197.38   14.30
   5  11  11  166.38   22.90
  14  12 -11    9.70   11.70
 -12 -12  11    8.70    7.00
 -12  12  11    2.60    4.70
 -10 -12  11   31.50    7.50
 -10  12  11   35.60    6.10
  -8 -12  11   70.69   13.30
  -8  12  11   40.70    9.60
  -8  12  11   45.60    6.40
  -6 -12  11   37.70    7.50
  -6  12  11   42.00    6.20
  -6  12  11   21.90    8.70
  -4 -12  11   -9.10   17.20
  -4 -12  11    5.60    5.50
  -4  12  11   -8.80    7.40
  -4  12  11    0.80    4.30
   2 -12 -11  -16.70   29.90
  -2 -12  11  -10.90   23.00
  -2 -12  11    9.60    5.60
  -2  12  11   -2.90    4.20
  -2  12  11   -8.40    7.40
   0  12  11   49.80   11.60
 -28   0  12  231.78   15.30
 -26   0  12  491.45   22.60
 -24   0  12  700.73   29.90
 -22   0  12  480.25   21.30
 -20   0  12   49.90    7.30
 -20   0  12   63.99    6.10
 -18   0  12   48.50    7.10
 -16   0  12  295.77   15.00
 -16   0  12  285.77   13.50
 -14   0  12  686.03   28.00
 -14   0  12  686.03   29.30
 -12   0  12 1287.97   53.09
 -12   0  12 1355.66   51.89
 -10   0  12  283.07   13.00
 -10   0  12  281.37   14.50
  -8   0  12  357.66   17.50
  -8   0  12  376.36   16.10
   6   0 -12  264.07   33.20
  -6   0  12  341.67   15.90
  -6   0  12  319.27   14.10
  -4   0  12  720.23   30.50
  -4   0  12  699.53   28.90
  -2   0  12 1871.31   74.49
  -2   0  12 1893.41   73.09
   0   0  12 1038.40   41.60
   0   0  12 1041.20   43.20
   2   0  12  657.33   29.60
   2   0  12  674.43   28.00
   4   0  12   -0.60    4.00
   4   0  12    3.00    2.50
   6   0  12   54.59    6.80
   6   0  12   34.00    5.50
   8   0  12   93.19   10.70
   8   0  12   91.89    8.50
  -8   0 -12  104.99    9.10
  10   0  12  282.97   17.30
 -10   0 -12  290.27   16.40
  10   0  12  284.37   15.70
 -12   0 -12  120.89   10.80
  12   0  12  105.29   10.20
  14   0  12  472.25   22.70
 -14   0 -12  434.86   23.40
  16   0  12  126.59   11.70
 -16   0 -12  115.59   12.10
 -29   1  12   29.90    5.00
 -27   1  12  103.09    9.50
 -25   1  12  174.78   11.40
 -23   1  12  326.07   16.20
 -21  -1  12  138.49   10.10
 -21  -1  12  116.09    8.80
 -21   1  12  123.89    8.90
 -19  -1  12    5.50    3.30
 -19  -1  12    3.50    2.40
 -19   1  12    5.30    2.70
 -19   1  12    3.30    3.00
 -17  -1  12    7.40    2.30
 -17  -1  12   12.90    3.50
 -17   1  12   11.20    2.80
 -17   1  12   14.00    3.50
 -15  -1  12  185.08    9.60
 -15  -1  12  199.08   11.80
 -15   1  12  198.48   10.40
 -15   1  12  199.28   11.60
 -13  -1  12  701.83   30.10
 -13  -1  12  684.23   28.20
 -13   1  12  705.03   30.10
 -13   1  12  722.53   29.10
 -11  -1  12   27.10    4.10
 -11  -1  12   33.80    6.10
 -11   1  12   23.40    3.90
 -11   1  12   25.40    3.10
  -9  -1  12  115.79    6.80
  -9  -1  12  124.09    9.00
  -9   1  12  120.79    9.00
  -9   1  12  124.89    7.60
  -7  -1  12   17.50    2.40
   7  -1 -12   12.70   13.30
  -7  -1  12   18.80    3.60
  -7   1  12   18.90    2.80
  -7   1  12   20.00    3.60
  -5  -1  12   71.69    7.80
  -5  -1  12   79.39    5.70
  -5   1  12   71.49    8.00
  -5   1  12   81.39    6.30
  -3  -1  12  115.29    7.20
   3  -1 -12  126.49   37.10
  -3  -1  12  104.49    9.40
  -3   1  12  127.69    7.90
  -3   1  12  122.19    9.70
  -1  -1  12  324.07   15.20
  -1  -1  12  330.07   17.00
  -1   1  12  357.66   15.80
   1   1 -12  317.87   40.80
  -1   1  12  356.86   17.70
   1  -1  12  414.96   18.70
   1  -1  12  409.06   20.40
   1   1  12  450.35   19.20
   1   1  12  432.96   21.10
   3  -1  12  410.66   18.30
   3  -1  12  394.26   20.10
   3   1  12  421.76   18.90
   3   1  12  401.66   20.80
   5  -1  12  110.19   10.60
   5  -1  12  109.99    8.10
   5   1  12   94.39    8.60
  -5   1 -12   93.19    8.60
   5   1  12   92.69   11.30
  -7  -1 -12   -2.30   21.30
   7  -1  12   24.10    4.80
   7   1  12   11.10    3.60
   7   1  12   15.40    5.00
  -7   1 -12    2.90   21.00
  -7   1 -12   20.40    3.80
   9  -1  12   16.40    3.40
  -9  -1 -12   -3.70   20.50
   9  -1  12   12.90    4.60
  -9  -1 -12   16.30    4.00
   9   1  12    8.50    3.70
  -9   1 -12  -16.30   20.30
  -9   1 -12   12.90    3.50
   9   1  12    9.40    5.00
 -11  -1 -12  436.66   22.20
  11  -1  12  446.86   21.10
  11   1  12  422.76   21.30
 -11   1 -12  433.06   22.00
  11   1  12  435.36   23.30
  13  -1  12  126.29   11.00
 -13  -1 -12  142.89   12.00
  13   1  12  149.49   11.50
 -13   1 -12  127.69   11.70
 -15  -1 -12   81.29   10.50
  15  -1  12   81.69   10.30
 -15   1 -12   71.49   10.50
  15   1  12  100.09   10.60
 -28   2  12   -2.90    3.70
 -26   2  12   28.30    4.50
 -24   2  12   -1.90    3.10
 -22  -2  12    7.50    3.60
 -22   2  12   -3.50    2.90
 -20   2  12    8.10    3.40
 -18  -2  12    1.80    3.40
 -18   2  12   -3.00    2.70
 -18   2  12    5.40    3.00
 -16  -2  12   83.89    8.40
 -16   2  12   78.99    8.00
 -16   2  12   74.89    7.20
 -14  -2  12  117.59    9.20
 -14   2  12  106.89    9.20
 -14   2  12  122.99    8.40
 -12  -2  12  172.08   10.70
 -12   2  12  184.18    9.90
 -12   2  12  148.79   10.70
 -10  -2  12  237.68   12.80
 -10  -2  12  215.18   11.90
 -10   2  12  238.88   11.90
 -10   2  12  231.78   13.30
  -8  -2  12   54.99    4.60
  -8  -2  12   67.69    7.10
  -8   2  12   74.29    6.50
  -8   2  12   69.99    7.90
  -6  -2  12   15.70    3.40
  -6  -2  12   31.20    3.90
   6  -2 -12   13.10   15.20
  -6   2  12   20.40    3.90
  -6   2  12   22.40    3.20
  -4  -2  12    3.50    1.80
  -4  -2  12   -2.90    2.90
  -4   2  12    1.00    2.50
  -4   2  12    0.30    3.10
   2  -2 -12   -3.20   17.50
  -2  -2  12    4.40    2.00
  -2  -2  12    1.10    3.20
   2   2 -12   -7.00   14.60
  -2   2  12    2.70    2.40
  -2   2  12    2.80    3.40
   0  -2  12  103.09    9.60
   0  -2  12  114.09    7.20
   0   2  12  110.89   10.50
   0   2  12  114.79    8.30
   2  -2  12  188.28   10.20
   2  -2  12  179.68   12.40
   2   2  12  200.78   11.30
   2   2  12  190.58   13.50
   4  -2  12   86.09    7.30
   4  -2  12   85.69    9.70
   4   2  12   83.39    8.70
   4   2  12   90.09   10.90
  -4   2 -12   80.89    7.70
   6  -2  12   21.70    3.50
  -6  -2 -12   -6.10   20.40
   6  -2  12   24.40    4.60
  -6   2 -12   16.10    3.50
   6   2  12   20.00    3.90
   6   2  12   17.10    5.30
   8  -2  12   91.29    8.30
   8  -2  12  100.59   10.20
   8   2  12   75.89    8.90
   8   2  12   72.09   11.30
  -8   2 -12   87.29    8.90
  10  -2  12  197.98   12.80
  10   2  12  202.38   15.70
 -10   2 -12  205.98   13.60
  10   2  12  220.58   13.30
 -12  -2 -12   15.50    4.60
  12  -2  12   13.30    4.00
 -12  -2 -12   -9.40   20.40
  12   2  12   16.00    4.40
  12   2  12    5.40    5.50
 -12   2 -12   12.70    4.20
 -14  -2 -12   15.20    4.80
 -14  -2 -12  -11.50   20.30
  14  -2  12   15.80    4.30
 -14   2 -12   10.50    4.40
  14   2  12   20.30    4.70
  16  -2  12    5.10    4.30
 -16  -2 -12    9.50    4.80
 -16  -2 -12   -6.10   20.00
[truncated: 96,067 more chars]
