# Supplementary material
Source: publisher figshare collection journal article supplement (https://acs.figshare.com/ndownloader/files/22494656)
Supplement: Supplementary file 1 [file 22494656 › CIF/1R.cif]

data_1r
_audit_creation_date               2019-02-22
_audit_creation_method
;
Olex2 1.2
(compiled 2018.05.29 svn.r3508 for OlexSys, GUI svn.r5506)
;
_shelx_SHELXL_version_number       '2016/6'
_audit_contact_author_address      ?
_audit_contact_author_email        ?
_audit_contact_author_name         ''
_audit_contact_author_phone        ?
_publ_contact_author_id_orcid      ?
_publ_section_references
;
Dolomanov, O.V., Bourhis, L.J., Gildea, R.J, Howard, J.A.K. & Puschmann, H.
 (2009), J. Appl. Cryst. 42, 339-341.

Sheldrick, G.M. (2008). Acta Cryst. A64, 112-122.
;
_chemical_name_common              ?
_chemical_name_systematic          ?
_chemical_formula_moiety           'C22 H17 Cu I N3 O, C2 H2 Br1.25'
_chemical_formula_sum              'C24 H19 Br1.25 Cu I N3 O'
_chemical_formula_weight           655.75
_chemical_melting_point            ?
loop_
  _atom_type_symbol
  _atom_type_description
  _atom_type_scat_dispersion_real
  _atom_type_scat_dispersion_imag
  _atom_type_scat_source
 'C' 'C' 0.0033 0.0016 'International Tables Vol C Tables 4.2.6.8 and 6.1.1.4'
 'H' 'H' 0.0000 0.0000 'International Tables Vol C Tables 4.2.6.8 and 6.1.1.4'
 'Br' 'Br' -0.2901 2.4595
 'International Tables Vol C Tables 4.2.6.8 and 6.1.1.4'
 'Cu' 'Cu' 0.3201 1.2651 'International Tables Vol C Tables 4.2.6.8 and 6.1.1.4'
 'I' 'I' -0.4742 1.8119 'International Tables Vol C Tables 4.2.6.8 and 6.1.1.4'
 'N' 'N' 0.0061 0.0033 'International Tables Vol C Tables 4.2.6.8 and 6.1.1.4'
 'O' 'O' 0.0106 0.0060 'International Tables Vol C Tables 4.2.6.8 and 6.1.1.4'

_shelx_space_group_comment
;
The symmetry employed for this shelxl refinement is uniquely defined
by the following loop, which should always be used as a source of
symmetry information in preference to the above space-group names.
They are only intended as comments.
;
_space_group_crystal_system        'monoclinic'
_space_group_IT_number             15
_space_group_name_H-M_alt          'C 1 2/c 1'
_space_group_name_Hall             '-C 2yc'
loop_
  _space_group_symop_operation_xyz
 'x, y, z'
 '-x, y, -z+1/2'
 'x+1/2, y+1/2, z'
 '-x+1/2, y+1/2, -z+1/2'
 '-x, -y, -z'
 'x, -y, z-1/2'
 '-x+1/2, -y+1/2, -z'
 'x+1/2, -y+1/2, z-1/2'

_cell_length_a                     24.3244(9)
_cell_length_b                     12.2780(5)
_cell_length_c                     17.7756(6)
_cell_angle_alpha                  90
_cell_angle_beta                   112.772(2)
_cell_angle_gamma                  90
_cell_volume                       4895.0(3)
_cell_formula_units_Z              8
_cell_measurement_reflns_used      5048
_cell_measurement_temperature      100(2)
_cell_measurement_theta_max        22.76
_cell_measurement_theta_min        2.45
_shelx_estimated_absorpt_T_max     0.486
_shelx_estimated_absorpt_T_min     0.320
_exptl_absorpt_coefficient_mu      4.215
_exptl_absorpt_correction_T_max    0.7452
_exptl_absorpt_correction_T_min    0.4154
_exptl_absorpt_correction_type     multi-scan
_exptl_absorpt_process_details    
 'SADABS-2014/4 (Bruker,2014/4) was used for absorption correction. wR2(int) was 0.1353 before and 0.0471 after correction. The Ratio of minimum to maximum transmission is 0.5574. The \l/2 correction factor is 0.00150.'
_exptl_absorpt_special_details     ?
_exptl_crystal_colour              'clear dark brown'
_exptl_crystal_colour_lustre       clear
_exptl_crystal_colour_modifier     dark
_exptl_crystal_colour_primary      brown
_exptl_crystal_density_diffrn      1.780
_exptl_crystal_density_meas        ?
_exptl_crystal_density_method      ?
_exptl_crystal_description         block
_exptl_crystal_F_000               2542
_exptl_crystal_size_max            0.35
_exptl_crystal_size_mid            0.25
_exptl_crystal_size_min            0.2
_exptl_transmission_factor_max     ?
_exptl_transmission_factor_min     ?
_diffrn_reflns_av_R_equivalents    0.0573
_diffrn_reflns_av_unetI/netI       0.0461
_diffrn_reflns_Laue_measured_fraction_full  0.998
_diffrn_reflns_Laue_measured_fraction_max  0.996
_diffrn_reflns_limit_h_max         29
_diffrn_reflns_limit_h_min         -29
_diffrn_reflns_limit_k_max         14
_diffrn_reflns_limit_k_min         -14
_diffrn_reflns_limit_l_max         21
_diffrn_reflns_limit_l_min         -21
_diffrn_reflns_number              25810
_diffrn_reflns_point_group_measured_fraction_full  0.998
_diffrn_reflns_point_group_measured_fraction_max  0.996
_diffrn_reflns_theta_full          25.242
_diffrn_reflns_theta_max           25.448
_diffrn_reflns_theta_min           1.816
_diffrn_ambient_temperature        100
_diffrn_detector_area_resol_mean   ?
_diffrn_measured_fraction_theta_full  0.998
_diffrn_measured_fraction_theta_max  0.996
_diffrn_measurement_device_type    'Bruker APEX-II CCD'
_diffrn_measurement_method         '\f and \w scans'
_diffrn_radiation_type             MoK\a
_diffrn_radiation_wavelength       0.71073
_diffrn_source                     ?
_diffrn_standards_number           0
_reflns_Friedel_coverage           0.000
_reflns_Friedel_fraction_full      .
_reflns_Friedel_fraction_max       .
_reflns_number_gt                  3197
_reflns_number_total               4524
_reflns_special_details
;
 Reflections were merged by SHELXL according to the crystal
 class for the calculation of statistics and refinement.
 
 _reflns_Friedel_fraction is defined as the number of unique
 Friedel pairs measured divided by the number that would be
 possible theoretically, ignoring centric projections and
 systematic absences.
;
_reflns_threshold_expression       'I > 2\s(I)'
_computing_cell_refinement         'SAINT v8.34A (Bruker, 2013)'
_computing_data_collection         ?
_computing_data_reduction          'SAINT v8.34A (Bruker, 2013)'
_computing_molecular_graphics      'Olex2 (Dolomanov et al., 2009)'
_computing_publication_material    'Olex2 (Dolomanov et al., 2009)'
_computing_structure_refinement    'XL (Sheldrick, 2008)'
_computing_structure_solution      'ShelXS (Sheldrick, 2008)'
_refine_diff_density_max           3.965
_refine_diff_density_min           -3.471
_refine_diff_density_rms           0.277
_refine_ls_extinction_coef         .
_refine_ls_extinction_method       none
_refine_ls_goodness_of_fit_ref     1.035
_refine_ls_hydrogen_treatment      constr
_refine_ls_matrix_type             full
_refine_ls_number_parameters       276
_refine_ls_number_reflns           4524
_refine_ls_number_restraints       0
_refine_ls_R_factor_all            0.1382
_refine_ls_R_factor_gt             0.1034
_refine_ls_restrained_S_all        1.035
_refine_ls_shift/su_max            0.001
_refine_ls_shift/su_mean           0.000
_refine_ls_structure_factor_coef   Fsqd
_refine_ls_weighting_details      
 'w=1/[\s^2^(Fo^2^)+(0.1477P)^2^+281.2669P] where P=(Fo^2^+2Fc^2^)/3'
_refine_ls_weighting_scheme        calc
_refine_ls_wR_factor_gt            0.2692
_refine_ls_wR_factor_ref           0.2998
_refine_special_details            ?
_olex2_refinement_description
;
1. Fixed Uiso
 At 1.2 times of:
  All C(H) groups, All C(H,H) groups
 At 1.5 times of:
  All C(H,H,H) groups
2. Others
 Fixed Sof: Br2(0.25)
3.a Secondary CH2 refined with riding coordinates:
 C0AA(H0AA,H0AB)
3.b Aromatic/amide H refined with riding coordinates:
 C8(H8), C10(H10), C16(H16), C12(H12), C13(H13), C1(H1), C14(H14), C17(H17),
 C2(H2), C15(H15), C20(H20), C19(H19), C5(H5), C4(H4)
3.c Idealised Me refined as rotating group:
 C22(H22A,H22B,H22C)
;
_atom_sites_solution_hydrogens     geom
_atom_sites_solution_primary       direct
_atom_sites_solution_secondary     ?
loop_
  _atom_site_label
  _atom_site_type_symbol
  _atom_site_fract_x
  _atom_site_fract_y
  _atom_site_fract_z
  _atom_site_U_iso_or_equiv
  _atom_site_adp_type
  _atom_site_occupancy
  _atom_site_site_symmetry_order
  _atom_site_calc_flag
  _atom_site_refinement_flags_posn
  _atom_site_refinement_flags_adp
  _atom_site_refinement_flags_occupancy
  _atom_site_disorder_assembly
  _atom_site_disorder_group
 I001 I 0.04250(4) 1.14900(9) 0.46413(6) 0.0468(4) Uani 1 1 d . . . . .
 Cu02 Cu -0.00007(6) 0.94884(13) 0.43725(8) 0.0287(4) Uani 1 1 d . . . . .
 N006 N 0.2521(4) 0.6127(8) 0.5711(5) 0.022(2) Uani 1 1 d . . . . .
 N007 N 0.0705(4) 0.8519(8) 0.4534(6) 0.025(2) Uani 1 1 d . . . . .
 O008 O 0.2128(5) 0.1133(8) 0.2297(6) 0.048(3) Uani 1 1 d . . . . .
 N009 N 0.4343(4) 0.5537(9) 0.8255(6) 0.027(2) Uani 1 1 d . . . . .
 C11 C 0.3441(5) 0.5436(10) 0.6702(7) 0.023(2) Uani 1 1 d . . . . .
 C6 C 0.2051(5) 0.6066(10) 0.4998(7) 0.023(2) Uani 1 1 d . . . . .
 C8 C 0.2900(5) 0.4484(9) 0.5386(6) 0.020(2) Uani 1 1 d . . . . .
 H8 H 0.320424 0.394624 0.553810 0.024 Uiso 1 1 calc R . . . .
 C21 C 0.2337(5) 0.3498(9) 0.4053(6) 0.022(2) Uani 1 1 d . . . . .
 C7 C 0.2937(5) 0.5352(9) 0.5895(6) 0.018(2) Uani 1 1 d . . . . .
 C10 C 0.1989(5) 0.5237(9) 0.4451(6) 0.022(2) Uani 1 1 d . . . . .
 H10 H 0.165885 0.523663 0.394105 0.026 Uiso 1 1 calc R . . . .
 C3 C 0.1590(5) 0.6925(10) 0.4828(7) 0.025(3) Uani 1 1 d . . . . .
 C16 C 0.2831(5) 0.2882(9) 0.4086(7) 0.025(3) Uani 1 1 d . . . . .
 H16 H 0.320984 0.301930 0.450550 0.030 Uiso 1 1 calc R . . . .
 C9 C 0.2405(5) 0.4403(9) 0.4637(7) 0.023(2) Uani 1 1 d . . . . .
 C12 C 0.3426(5) 0.6199(10) 0.7272(7) 0.026(3) Uani 1 1 d . . . . .
 H12 H 0.310521 0.670075 0.713582 0.032 Uiso 1 1 calc R . . . .
 C13 C 0.3880(5) 0.6223(11) 0.8034(7) 0.030(3) Uani 1 1 d . . . . .
 H13 H 0.386328 0.674767 0.841729 0.037 Uiso 1 1 calc R . . . .
 C18 C 0.2226(7) 0.1904(11) 0.2889(7) 0.034(3) Uani 1 1 d . . . . .
 C1 C 0.1174(6) 0.8454(12) 0.5243(7) 0.034(3) Uani 1 1 d . . . . .
 H1 H 0.120240 0.896347 0.565807 0.040 Uiso 1 1 calc R . . . .
 C14 C 0.4358(6) 0.4831(11) 0.7698(7) 0.031(3) Uani 1 1 d . . . . .
 H14 H 0.468620 0.434439 0.784499 0.038 Uiso 1 1 calc R . . . .
 C17 C 0.2773(6) 0.2074(10) 0.3515(7) 0.030(3) Uani 1 1 d . . . . .
 H17 H 0.310668 0.164151 0.355469 0.036 Uiso 1 1 calc R . . . .
 C2 C 0.1613(5) 0.7695(11) 0.5402(7) 0.031(3) Uani 1 1 d . . . . .
 H2 H 0.193859 0.769770 0.591588 0.037 Uiso 1 1 calc R . . . .
 C15 C 0.3928(5) 0.4761(11) 0.6920(7) 0.030(3) Uani 1 1 d . . . . .
 H15 H 0.396770 0.425343 0.654083 0.036 Uiso 1 1 calc R . . . .
 C20 C 0.1790(6) 0.3282(11) 0.3425(8) 0.035(3) Uani 1 1 d . . . . .
 H20 H 0.144758 0.368914 0.338723 0.042 Uiso 1 1 calc R . . . .
 C19 C 0.1740(7) 0.2486(11) 0.2862(8) 0.039(3) Uani 1 1 d . . . . .
 H19 H 0.136162 0.233676 0.244483 0.047 Uiso 1 1 calc R . . . .
 C5 C 0.0695(6) 0.7816(12) 0.3955(7) 0.040(3) Uani 1 1 d . . . . .
 H5 H 0.037989 0.786415 0.343295 0.048 Uiso 1 1 calc R . . . .
 C4 C 0.1118(6) 0.7032(12) 0.4084(8) 0.043(4) Uani 1 1 d . . . . .
 H4 H 0.108836 0.654914 0.365198 0.051 Uiso 1 1 calc R . . . .
 C22 C 0.2615(9) 0.0414(15) 0.2384(11) 0.064(6) Uani 1 1 d . . . . .
 H22A H 0.275518 0.006674 0.292174 0.097 Uiso 1 1 calc GR . . . .
 H22B H 0.294121 0.083095 0.232976 0.097 Uiso 1 1 calc GR . . . .
 H22C H 0.248036 -0.014697 0.195855 0.097 Uiso 1 1 calc GR . . . .
 Br1 Br -0.0671(3) 0.5590(7) 0.4035(5) 0.296(5) Uani 1 1 d . . . . .
 Br2 Br 0.000000 0.3179(7) 0.250000 0.117(3) Uani 0.5 2 d S T P . .
 C0AA C -0.0659(6) 0.5710(12) 0.2977(9) 0.038(3) Uiso 1 1 d . . . . .
 H0AA H -0.059807 0.649356 0.290400 0.045 Uiso 1 1 calc R . . . .
 H0AB H -0.106961 0.553961 0.259391 0.045 Uiso 1 1 calc R . . . .
 C1AA C -0.0130(4) 0.4932(8) 0.2547(7) 0.018(2) Uiso 1 1 d . . . . .

loop_
  _atom_site_aniso_label
  _atom_site_aniso_U_11
  _atom_site_aniso_U_22
  _atom_site_aniso_U_33
  _atom_site_aniso_U_23
  _atom_site_aniso_U_13
  _atom_site_aniso_U_12
 I001 0.0402(6) 0.0661(7) 0.0358(6) -0.0045(5) 0.0167(4) -0.0079(5)
 Cu02 0.0205(7) 0.0426(10) 0.0195(7) 0.0029(6) 0.0040(6) 0.0066(7)
 N006 0.024(5) 0.025(5) 0.014(4) -0.001(4) 0.003(4) 0.002(4)
 N007 0.020(5) 0.024(5) 0.024(5) 0.001(4) 0.003(4) 0.001(4)
 O008 0.083(8) 0.033(5) 0.029(5) -0.014(4) 0.024(5) -0.020(5)
 N009 0.014(5) 0.039(6) 0.024(5) -0.010(5) 0.004(4) -0.002(4)
 C11 0.026(6) 0.025(6) 0.017(5) 0.003(5) 0.007(5) 0.000(5)
 C6 0.021(6) 0.021(6) 0.021(6) 0.004(5) 0.003(4) 0.000(5)
 C8 0.021(5) 0.022(6) 0.015(5) 0.002(4) 0.003(4) 0.002(5)
 C21 0.038(7) 0.013(5) 0.012(5) 0.001(4) 0.006(5) -0.007(5)
 C7 0.018(5) 0.017(5) 0.018(5) 0.001(4) 0.005(4) 0.002(4)
 C10 0.022(6) 0.022(6) 0.014(5) -0.001(4) -0.001(4) 0.001(5)
 C3 0.021(6) 0.027(6) 0.020(6) 0.004(5) 0.000(5) 0.005(5)
 C16 0.035(7) 0.020(6) 0.019(5) 0.003(4) 0.009(5) -0.011(5)
 C9 0.035(6) 0.015(5) 0.018(5) 0.000(4) 0.009(5) -0.008(5)
 C12 0.020(6) 0.028(6) 0.025(6) -0.004(5) 0.002(5) 0.007(5)
 C13 0.024(6) 0.038(7) 0.021(6) -0.009(5) 0.001(5) -0.002(5)
 C18 0.059(9) 0.029(7) 0.020(6) -0.007(5) 0.020(6) -0.016(7)
 C1 0.030(7) 0.046(8) 0.018(6) -0.010(5) 0.002(5) 0.013(6)
 C14 0.024(6) 0.040(8) 0.024(6) -0.004(5) 0.003(5) 0.003(5)
 C17 0.046(8) 0.023(6) 0.029(6) -0.005(5) 0.023(6) -0.009(6)
 C2 0.026(6) 0.043(8) 0.016(5) -0.012(5) 0.000(5) 0.007(6)
 C15 0.022(6) 0.040(7) 0.026(6) -0.008(5) 0.008(5) 0.005(5)
 C20 0.036(7) 0.030(7) 0.030(7) -0.002(5) 0.003(6) 0.000(6)
 C19 0.053(9) 0.024(7) 0.027(6) -0.002(5) -0.001(6) -0.011(6)
 C5 0.039(8) 0.047(9) 0.017(6) -0.006(6) -0.009(5) 0.012(7)
 C4 0.045(8) 0.036(8) 0.031(7) -0.016(6) -0.004(6) 0.011(7)
 C22 0.100(14) 0.057(11) 0.065(11) -0.042(9) 0.064(11) -0.034(10)
 Br1 0.198(5) 0.370(11) 0.285(8) 0.120(8) 0.056(5) 0.192(7)
 Br2 0.132(7) 0.081(5) 0.162(9) 0.000 0.082(7) 0.000

_geom_special_details
;
 All esds (except the esd in the dihedral angle between two l.s. planes)
 are estimated using the full covariance matrix.  The cell esds are taken
 into account individually in the estimation of esds in distances, angles
 and torsion angles; correlations between esds in cell parameters are only
 used when they are defined by crystal symmetry.  An approximate (isotropic)
 treatment of cell esds is used for estimating esds involving l.s. planes.
;
loop_
  _geom_bond_atom_site_label_1
  _geom_bond_atom_site_label_2
  _geom_bond_distance
  _geom_bond_site_symmetry_2
  _geom_bond_publ_flag
 I001 Cu02 2.638(2) . ?
 I001 Cu02 2.6423(18) 5_576 ?
 Cu02 Cu02 2.559(3) 5_576 ?
 Cu02 N007 2.017(10) . ?
 Cu02 N009 2.011(9) 8_465 ?
 N006 C6 1.342(14) . ?
 N006 C7 1.334(14) . ?
 N007 C1 1.334(15) . ?
 N007 C5 1.335(17) . ?
 O008 C18 1.367(15) . ?
 O008 C22 1.44(2) . ?
 N009 C13 1.337(16) . ?
 N009 C14 1.327(16) . ?
 C11 C7 1.487(15) . ?
 C11 C12 1.389(17) . ?
 C11 C15 1.374(17) . ?
 C6 C10 1.374(16) . ?
 C6 C3 1.483(17) . ?
 C8 H8 0.9500 . ?
 C8 C7 1.378(16) . ?
 C8 C9 1.412(15) . ?
 C21 C16 1.401(17) . ?
 C21 C9 1.485(15) . ?
 C21 C20 1.393(17) . ?
 C10 H10 0.9500 . ?
 C10 C9 1.387(16) . ?
 C3 C2 1.377(17) . ?
 C3 C4 1.382(17) . ?
 C16 H16 0.9500 . ?
 C16 C17 1.387(17) . ?
 C12 H12 0.9500 . ?
 C12 C13 1.377(16) . ?
 C13 H13 0.9500 . ?
 C18 C17 1.381(19) . ?
 C18 C19 1.37(2) . ?
 C1 H1 0.9500 . ?
 C1 C2 1.361(18) . ?
 C14 H14 0.9500 . ?
 C14 C15 1.375(17) . ?
 C17 H17 0.9500 . ?
 C2 H2 0.9500 . ?
 C15 H15 0.9500 . ?
 C20 H20 0.9500 . ?
 C20 C19 1.372(19) . ?
 C19 H19 0.9500 . ?
 C5 H5 0.9500 . ?
 C5 C4 1.362(19) . ?
 C4 H4 0.9500 . ?
 C22 H22A 0.9800 . ?
 C22 H22B 0.9800 . ?
 C22 H22C 0.9800 . ?
 Br1 C0AA 1.898(16) . ?
 Br2 C1AA 2.182(13) . ?
 Br2 C1AA 2.182(13) 2 ?
 C0AA H0AA 0.9900 . ?
 C0AA H0AB 0.9900 . ?
 C0AA C1AA 1.978(17) . ?
 C1AA C1AA 0.715(17) 2 ?

loop_
  _geom_angle_atom_site_label_1
  _geom_angle_atom_site_label_2
  _geom_angle_atom_site_label_3
  _geom_angle
  _geom_angle_site_symmetry_1
  _geom_angle_site_symmetry_3
  _geom_angle_publ_flag
 Cu02 I001 Cu02 57.98(6) . 5_576 ?
 I001 Cu02 I001 122.02(6) . 5_576 ?
 Cu02 Cu02 I001 61.10(7) 5_576 . ?
 Cu02 Cu02 I001 60.92(6) 5_576 5_576 ?
 N007 Cu02 I001 99.6(3) . 5_576 ?
 N007 Cu02 I001 105.7(3) . . ?
 N007 Cu02 Cu02 116.9(3) . 5_576 ?
 N009 Cu02 I001 107.4(3) 8_465 . ?
 N009 Cu02 I001 106.5(3) 8_465 5_576 ?
 N009 Cu02 Cu02 127.0(3) 8_465 5_576 ?
 N009 Cu02 N007 116.0(4) 8_465 . ?
 C7 N006 C6 118.6(10) . . ?
 C1 N007 Cu02 122.6(8) . . ?
 C1 N007 C5 116.3(10) . . ?
 C5 N007 Cu02 120.7(8) . . ?
 C18 O008 C22 116.9(12) . . ?
 C13 N009 Cu02 123.8(8) . 8_566 ?
 C14 N009 Cu02 119.1(8) . 8_566 ?
 C14 N009 C13 117.1(10) . . ?
 C12 C11 C7 120.4(10) . . ?
 C15 C11 C7 121.9(10) . . ?
 C15 C11 C12 117.6(10) . . ?
 N006 C6 C10 122.0(10) . . ?
 N006 C6 C3 117.0(10) . . ?
 C10 C6 C3 121.0(10) . . ?
 C7 C8 H8 120.4 . . ?
 C7 C8 C9 119.3(10) . . ?
 C9 C8 H8 120.4 . . ?
 C16 C21 C9 120.9(10) . . ?
 C20 C21 C16 118.0(11) . . ?
 C20 C21 C9 121.0(11) . . ?
 N006 C7 C11 116.7(10) . . ?
 N006 C7 C8 122.7(10) . . ?
 C8 C7 C11 120.5(10) . . ?
 C6 C10 H10 119.7 . . ?
 C6 C10 C9 120.5(10) . . ?
 C9 C10 H10 119.7 . . ?
 C2 C3 C6 121.8(10) . . ?
 C2 C3 C4 115.1(11) . . ?
 C4 C3 C6 123.0(11) . . ?
 C21 C16 H16 119.6 . . ?
 C17 C16 C21 120.9(11) . . ?
 C17 C16 H16 119.6 . . ?
 C8 C9 C21 122.4(11) . . ?
 C10 C9 C8 116.7(10) . . ?
 C10 C9 C21 120.8(10) . . ?
 C11 C12 H12 120.2 . . ?
 C13 C12 C11 119.7(11) . . ?
 C13 C12 H12 120.2 . . ?
 N009 C13 C12 122.5(11) . . ?
 N009 C13 H13 118.7 . . ?
 C12 C13 H13 118.7 . . ?
 O008 C18 C17 123.5(14) . . ?
 C19 C18 O008 116.4(12) . . ?
 C19 C18 C17 120.0(12) . . ?
 N007 C1 H1 118.3 . . ?
 N007 C1 C2 123.5(11) . . ?
 C2 C1 H1 118.3 . . ?
 N009 C14 H14 117.9 . . ?
 N009 C14 C15 124.2(12) . . ?
 C15 C14 H14 117.9 . . ?
 C16 C17 H17 120.3 . . ?
 C18 C17 C16 119.4(13) . . ?
 C18 C17 H17 120.3 . . ?
 C3 C2 H2 119.6 . . ?
 C1 C2 C3 120.8(11) . . ?
 C1 C2 H2 119.6 . . ?
 C11 C15 C14 118.8(11) . . ?
 C11 C15 H15 120.6 . . ?
 C14 C15 H15 120.6 . . ?
 C21 C20 H20 119.8 . . ?
 C19 C20 C21 120.5(13) . . ?
 C19 C20 H20 119.8 . . ?
 C18 C19 C20 121.1(13) . . ?
 C18 C19 H19 119.4 . . ?
 C20 C19 H19 119.4 . . ?
 N007 C5 H5 118.7 . . ?
 N007 C5 C4 122.7(11) . . ?
 C4 C5 H5 118.7 . . ?
 C3 C4 H4 119.3 . . ?
 C5 C4 C3 121.4(12) . . ?
 C5 C4 H4 119.3 . . ?
 O008 C22 H22A 109.5 . . ?
 O008 C22 H22B 109.5 . . ?
 O008 C22 H22C 109.5 . . ?
 H22A C22 H22B 109.5 . . ?
 H22A C22 H22C 109.5 . . ?
 H22B C22 H22C 109.5 . . ?
 C1AA Br2 C1AA 18.9(5) 2 . ?
 Br1 C0AA H0AA 105.4 . . ?
 Br1 C0AA H0AB 105.4 . . ?
 Br1 C0AA C1AA 127.4(8) . . ?
 H0AA C0AA H0AB 106.0 . . ?
 C1AA C0AA H0AA 105.4 . . ?
 C1AA C0AA H0AB 105.4 . . ?
 C0AA C1AA Br2 128.1(6) . . ?
 C1AA C1AA Br2 80.6(2) 2 . ?
 C1AA C1AA C0AA 149.1(9) 2 . ?

_shelx_res_file
;
TITL 1r.res in C2/c
    1r.res
    created by SHELXL-2016/6 at 13:04:56 on 22-Feb-2019
REM Old TITL ty5 in C2/c
REM SHELXT solution in C2/c
REM R1 0.205, Rweak 0.010, Alpha 0.035, Orientation as input
REM Formula found by SHELXT: C25 N4 O2 Cu I
CELL 0.71073 24.3244 12.278 17.7756 90 112.772 90
ZERR 8 0.0009 0.0005 0.0006 0 0.002 0
LATT 7
SYMM -X,+Y,0.5-Z
SFAC C H Br Cu I N O
UNIT 192 152 10 8 8 24 8

L.S. 4
PLAN  20
SIZE 0.35 0.25 0.2
TEMP -173.15
BOND $H
fmap 2
acta
OMIT 0 2 3
OMIT -4 2 3
OMIT 4 2 0
OMIT 3 1 0
OMIT 2 2 0
OMIT 0 2 0
OMIT 1 1 0
REM <olex2.extras>
REM <HklSrc "%.\\1r.hkl">
REM </olex2.extras>

WGHT    0.147700  281.266907
FVAR       0.13954
I001  5    0.042503    1.148996    0.464132    11.00000    0.04019    0.06614 =
         0.03579   -0.00447    0.01672   -0.00794
CU02  4   -0.000074    0.948840    0.437253    11.00000    0.02049    0.04261 =
         0.01954    0.00288    0.00401    0.00662
N006  6    0.252123    0.612709    0.571146    11.00000    0.02436    0.02502 =
         0.01404   -0.00074    0.00295    0.00204
N007  6    0.070546    0.851885    0.453371    11.00000    0.02043    0.02405 =
         0.02436    0.00097    0.00310    0.00081
O008  7    0.212781    0.113311    0.229650    11.00000    0.08261    0.03343 =
         0.02928   -0.01423    0.02412   -0.02034
N009  6    0.434270    0.553731    0.825482    11.00000    0.01438    0.03944 =
         0.02377   -0.01001    0.00389   -0.00206
C11   1    0.344071    0.543646    0.670226    11.00000    0.02557    0.02457 =
         0.01672    0.00334    0.00721   -0.00048
C6    1    0.205106    0.606598    0.499753    11.00000    0.02119    0.02128 =
         0.02088    0.00418    0.00300    0.00039
C8    1    0.289976    0.448395    0.538633    11.00000    0.02079    0.02201 =
         0.01462    0.00167    0.00329    0.00207
AFIX  43
H8    2    0.320424    0.394624    0.553810    11.00000   -1.20000
AFIX   0
C21   1    0.233720    0.349828    0.405327    11.00000    0.03836    0.01333 =
         0.01189    0.00082    0.00569   -0.00725
C7    1    0.293669    0.535171    0.589520    11.00000    0.01800    0.01701 =
         0.01831    0.00150    0.00502    0.00199
C10   1    0.198902    0.523743    0.445071    11.00000    0.02194    0.02207 =
         0.01408   -0.00140   -0.00093    0.00085
AFIX  43
H10   2    0.165885    0.523663    0.394105    11.00000   -1.20000
AFIX   0
C3    1    0.158993    0.692457    0.482786    11.00000    0.02133    0.02717 =
         0.02015    0.00407   -0.00029    0.00539
C16   1    0.283057    0.288208    0.408635    11.00000    0.03455    0.01957 =
         0.01933    0.00264    0.00895   -0.01118
AFIX  43
H16   2    0.320984    0.301930    0.450550    11.00000   -1.20000
AFIX   0
C9    1    0.240466    0.440252    0.463713    11.00000    0.03548    0.01536 =
         0.01795   -0.00009    0.00937   -0.00848
C12   1    0.342634    0.619867    0.727152    11.00000    0.02019    0.02757 =
         0.02530   -0.00355    0.00228    0.00698
AFIX  43
H12   2    0.310521    0.670075    0.713582    11.00000   -1.20000
AFIX   0
C13   1    0.387984    0.622320    0.803369    11.00000    0.02431    0.03820 =
         0.02146   -0.00909    0.00075   -0.00209
AFIX  43
H13   2    0.386328    0.674767    0.841729    11.00000   -1.20000
AFIX   0
C18   1    0.222586    0.190409    0.288900    11.00000    0.05927    0.02854 =
         0.01958   -0.00713    0.01970   -0.01556
C1    1    0.117378    0.845353    0.524259    11.00000    0.03025    0.04604 =
         0.01773   -0.00992    0.00177    0.01260
AFIX  43
H1    2    0.120240    0.896347    0.565807    11.00000   -1.20000
AFIX   0
C14   1    0.435777    0.483149    0.769752    11.00000    0.02411    0.04003 =
         0.02426   -0.00372    0.00295    0.00251
AFIX  43
H14   2    0.468620    0.434439    0.784499    11.00000   -1.20000
AFIX   0
C17   1    0.277281    0.207413    0.351527    11.00000    0.04635    0.02262 =
         0.02880   -0.00508    0.02268   -0.00874
AFIX  43
H17   2    0.310668    0.164151    0.355469    11.00000   -1.20000
AFIX   0
C2    1    0.161256    0.769531    0.540203    11.00000    0.02618    0.04278 =
         0.01580   -0.01222   -0.00049    0.00714
AFIX  43
H2    2    0.193859    0.769770    0.591588    11.00000   -1.20000
AFIX   0
C15   1    0.392824    0.476065    0.692042    11.00000    0.02214    0.04046 =
         0.02644   -0.00801    0.00846    0.00476
AFIX  43
H15   2    0.396770    0.425343    0.654083    11.00000   -1.20000
AFIX   0
C20   1    0.178952    0.328213    0.342534    11.00000    0.03641    0.03014 =
         0.02977   -0.00216    0.00290    0.00011
AFIX  43
H20   2    0.144758    0.368914    0.338723    11.00000   -1.20000
AFIX   0
C19   1    0.174027    0.248592    0.286161    11.00000    0.05260    0.02418 =
         0.02663   -0.00158   -0.00063   -0.01069
AFIX  43
H19   2    0.136162    0.233676    0.244483    11.00000   -1.20000
AFIX   0
C5    1    0.069517    0.781580    0.395528    11.00000    0.03873    0.04746 =
         0.01694   -0.00550   -0.00900    0.01183
AFIX  43
H5    2    0.037989    0.786415    0.343295    11.00000   -1.20000
AFIX   0
C4    1    0.111823    0.703221    0.408358    11.00000    0.04494    0.03638 =
         0.03054   -0.01615   -0.00362    0.01058
AFIX  43
H4    2    0.108836    0.654914    0.365198    11.00000   -1.20000
AFIX   0
C22   1    0.261488    0.041374    0.238356    11.00000    0.10033    0.05704 =
         0.06502   -0.04174    0.06375   -0.03392
AFIX 137
H22A  2    0.275518    0.006674    0.292174    11.00000   -1.50000
H22B  2    0.294121    0.083095    0.232976    11.00000   -1.50000
H22C  2    0.248036   -0.014697    0.195855    11.00000   -1.50000
AFIX   0

BR1   3   -0.067143    0.558965    0.403494    11.00000    0.19836    0.37000 =
         0.28518    0.11978    0.05597    0.19155
BR2   3    0.000000    0.317888    0.250000    10.25000    0.13178    0.08081 =
         0.16199    0.00000    0.08201    0.00000
C0AA  1   -0.065863    0.570960    0.297742    11.00000    0.03757
AFIX  23
H0AA  2   -0.059807    0.649356    0.290400    11.00000   -1.20000
H0AB  2   -0.106961    0.553961    0.259391    11.00000   -1.20000
AFIX   0
C1AA  1   -0.012999    0.493176    0.254735    11.00000    0.01821
HKLF 4


REM  1r.res in C2/c
REM R1 =  0.1034 for    3197 Fo > 4sig(Fo)  and  0.1382 for all    4524 data
REM    276 parameters refined using      0 restraints

END

WGHT      0.1477    281.4669

REM Highest difference peak  3.965,  deepest hole -3.471,  1-sigma level  0.277
Q1    1  -0.0319  0.5160  0.2596  11.00000  0.05    3.61
Q2    1  -0.0712  0.5652  0.5238  11.00000  0.05    3.47
Q3    1  -0.0821  0.5671  0.3271  11.00000  0.05    2.42
Q4    1   0.0509  1.0805  0.4730  11.00000  0.05    2.17
Q5    1  -0.0867  0.4806  0.3916  11.00000  0.05    2.17
Q6    1  -0.1014  0.5395  0.4669  11.00000  0.05    1.99
Q7    1  -0.0542  0.4316  0.3761  11.00000  0.05    1.62
Q8    1  -0.0053  0.4178  0.3528  11.00000  0.05    1.57
Q9    1  -0.0002  0.8910  0.4400  11.00000  0.05    1.48
Q10   1  -0.0093  0.5412  0.4561  11.00000  0.05    0.99
Q11   1   0.0018  0.7411  0.4428  11.00000  0.05    0.68
Q12   1  -0.0090  0.3307  0.1492  11.00000  0.05    0.67
Q13   1  -0.0118  1.1237  0.4572  11.00000  0.05    0.66
Q14   1   0.1890  0.6462  0.4966  11.00000  0.05    0.62
Q15   1   0.0366  0.7960  0.2545  11.00000  0.05    0.60
Q16   1   0.2173  0.4826  0.4552  11.00000  0.05    0.58
Q17   1   0.1515  0.7074  0.5133  11.00000  0.05    0.58
Q18   1   0.0399  1.2431  0.4998  11.00000  0.05    0.57
Q19   1   0.0500  0.7943  0.4643  11.00000  0.05    0.56
Q20   1  -0.0109  1.2069  0.4130  11.00000  0.05    0.55
;
_shelx_res_checksum                438
_shelx_hkl_file
;
   2   0   0 4405.56   99.89
   2   0   0 4476.15   99.39
  -2   0   0 4217.38   99.49
   4   0   0 6932.11  162.58
   4   0   0 7132.19  161.58
  -4   0   0 7145.38  161.78
   4   0   0 7156.98  160.58
  -6   0   0   59.49    5.10
   6   0   0   59.09    4.20
   6   0   0   67.79    7.10
   6   0   0   69.99    5.50
   8   0   0  380.86   13.80
  -8   0   0  366.86   13.90
   8   0   0  392.76   16.70
   8   0   0  376.46   11.80
  10   0   0   80.99   10.60
  10   0   0   70.49    5.70
 -10   0   0   49.20    6.80
  10   0   0   57.99    7.00
  12   0   0    9.20    4.50
  12   0   0    1.30    6.50
  12   0   0   25.20   10.10
 -12   0   0   14.80    4.70
 -12   0   0   23.00    6.50
  14   0   0  214.18   21.60
  14   0   0  228.18   12.10
 -14   0   0  245.78   12.20
 -14   0   0  224.88   15.40
  14   0   0  227.08   15.70
 -16   0   0  250.87   13.80
 -16   0   0  234.58   17.50
  16   0   0  253.07   14.00
  16   0   0  270.97   19.90
  16   0   0  261.47   26.80
 -18   0   0 1003.60   37.30
  18   0   0 1022.60   49.60
  18   0   0 1063.49   32.00
 -18   0   0 1016.90   31.60
 -20   0   0  673.23   32.40
  20   0   0  734.93   48.00
 -22   0   0   44.10   15.50
 -24   0   0  501.45   35.90
 -26   0   0  256.17   27.40
  -1  -1   0 1175.78   28.30
   1  -1   0 1162.28   28.60
  -1   1   0 1224.38   28.40
   1   1   0 1198.08   28.40
  -3  -1   0  223.68    7.30
   3  -1   0  216.28    7.20
   3  -1   0  220.98    7.00
   3  -1   0  222.78    6.10
  -3  -1   0  229.88    6.40
  -3   1   0  217.98    7.40
   3   1   0  227.88   10.00
   3   1   0  233.28    7.50
  -3   1   0  217.78    6.10
   5  -1   0  546.95   15.60
  -5  -1   0  580.64   16.40
  -5  -1   0  566.34   14.70
   5  -1   0  568.04   16.30
   5  -1   0  545.15   15.30
   5   1   0  554.54   16.20
   5   1   0  550.04   20.30
   5   1   0  564.54   14.80
  -5   1   0  618.04   16.90
   7  -1   0  742.53   21.80
   7  -1   0  762.52   21.70
  -7  -1   0  723.63   19.30
   7  -1   0  729.13   19.90
  -7  -1   0  753.92   21.70
   7   1   0  734.23   21.50
   7   1   0  744.73   26.00
   7   1   0  737.03   19.40
  -7   1   0  730.03   21.70
   9  -1   0  117.09    7.20
  -9  -1   0  130.19    9.20
  -9  -1   0  121.19    6.70
   9  -1   0  132.79   10.30
   9  -1   0  124.39    9.30
  -9   1   0  144.59    9.60
   9   1   0  127.49    6.90
   9   1   0  124.49    9.20
   9   1   0  128.99   13.10
  11  -1   0   56.59    5.90
 -11  -1   0   62.19    5.80
 -11  -1   0   58.19    7.60
  11  -1   0   61.69    9.60
  11  -1   0   36.90    7.00
  11   1   0   64.49   12.30
 -11   1   0   54.79    7.60
  11   1   0   59.89    5.70
  11   1   0   62.89    7.60
  13  -1   0   19.90    7.40
 -13  -1   0   32.20    7.80
  13  -1   0   49.70    6.40
  13  -1   0   37.10   10.40
 -13  -1   0   36.30    5.70
  13   1   0   25.40    5.50
 -13   1   0   39.20    8.10
  13   1   0   38.30    8.20
  13   1   0   27.40   12.60
  15  -1   0   31.30    9.30
 -15  -1   0   28.50    6.10
  15  -1   0   16.30    6.40
 -15  -1   0   25.90    8.70
  15  -1   0   26.00   13.30
  15   1   0   15.70    5.80
  15   1   0    7.40    8.20
  15   1   0   24.20   14.10
 -15   1   0   19.80    8.50
  17  -1   0   96.19   10.30
 -17  -1   0  118.89   14.10
 -17  -1   0  111.19    9.70
  17  -1   0  106.59   20.00
  17   1   0  116.09   22.40
  17   1   0  112.19    9.80
 -17   1   0   86.59   12.80
  19  -1   0  661.43   25.00
 -19  -1   0  633.54   30.00
  19   1   0  688.53   42.90
 -19   1   0  647.24   24.80
 -19   1   0  636.94   30.40
 -21  -1   0  123.19   17.50
 -21   1   0  121.39   17.80
  21   1   0  140.29   26.20
 -23  -1   0  182.98   22.00
 -23   1   0  210.88   22.80
 -25  -1   0  171.78   24.80
 -25   1   0  171.18   24.60
 -27  -1   0  169.68   26.50
 -27   1   0  115.59   24.60
   0  -2   0 3306.87   77.69
   0  -2   0 3303.47   76.29
   0   2   0 3311.97   76.69
   0   2   0 3250.17   77.99
  -2  -2   0 1876.91   46.30
   2  -2   0 1897.21   47.00
  -2  -2   0 1928.51   46.20
   2  -2   0 1973.70   45.70
   2  -2   0 1983.70   46.40
  -2   2   0 2003.00   46.50
   2   2   0 1923.31   46.60
  -2   2   0 1935.81   45.00
   2   2   0 1812.82   49.60
  -4  -2   0 1081.39   27.10
  -4  -2   0 1082.69   28.10
   4  -2   0 1108.19   28.40
   4  -2   0 1094.39   25.70
   4  -2   0 1079.79   28.10
  -4   2   0 1103.39   25.90
   4   2   0 1123.29   28.60
   4   2   0 1075.99   34.00
  -4   2   0 1121.19   28.70
   6  -2   0   85.09    6.10
   6  -2   0   97.49    7.00
   6  -2   0   83.49    4.80
  -6  -2   0   89.79    6.60
  -6  -2   0   82.29    5.10
   6   2   0  111.79   12.00
   6   2   0   89.79    6.80
  -6   2   0   88.69    6.90
  -6   2   0   75.59    4.30
  -8  -2   0  184.78   10.10
  -8  -2   0  184.28    7.60
   8  -2   0  176.98   10.00
   8  -2   0  194.18    9.00
   8  -2   0  181.48    8.70
   8   2   0  202.48   16.60
  -8   2   0  156.68   10.00
   8   2   0  182.28    8.10
   8   2   0  182.68   10.20
  10  -2   0  808.32   26.00
  10  -2   0  849.52   24.40
 -10  -2   0  844.62   26.30
 -10  -2   0  820.22   22.80
  10  -2   0  901.91   26.40
 -10   2   0  791.12   26.50
  10   2   0  815.82   23.20
  10   2   0  908.81   35.20
  10   2   0  882.11   26.60
  12  -2   0  666.03   24.50
 -12  -2   0  708.13   20.90
  12  -2   0  762.32   22.80
 -12  -2   0  725.53   25.00
  12  -2   0  735.63   26.60
  12   2   0  730.03   21.50
  12   2   0  800.12   35.80
  12   2   0  684.73   24.70
 -12   2   0  698.03   25.40
  14  -2   0  925.21   35.20
  14  -2   0  979.10   28.50
  14  -2   0  957.80   31.40
 -14  -2   0  959.90   31.70
 -14  -2   0  919.31   26.60
 -14   2   0  937.71   32.10
  14   2   0  912.01   27.10
  14   2   0  916.61   31.60
  14   2   0  914.81   43.30
  16  -2   0  529.15   30.90
 -16  -2   0  515.95   18.40
 -16  -2   0  476.95   23.80
  16  -2   0  512.75   20.20
  16   2   0  491.05   36.00
  16   2   0  500.95   24.30
 -16   2   0  506.25   24.70
  16   2   0  536.85   19.10
 -18  -2   0   17.50   10.70
  18  -2   0   34.70    9.20
  18   2   0   38.80   19.00
 -18   2   0   26.40   11.70
  20  -2   0  201.98   15.30
 -20  -2   0  215.98   19.90
  20   2   0  236.58   30.40
 -20   2   0  232.08   21.00
 -22  -2   0   12.10   14.80
  22   2   0  -14.60   19.60
 -22   2   0  -16.20   14.70
 -24  -2   0    1.60   17.00
 -24   2   0  -10.00   16.70
 -26  -2   0   31.20   20.40
 -26   2   0  -27.10   18.50
   1  -3   0 1635.54   39.90
  -1  -3   0 1633.14   42.00
  -1  -3   0 1621.94   40.40
   1  -3   0 1634.94   42.30
   1  -3   0 1645.24   41.10
   1   3   0 1656.83   41.00
  -1   3   0 1636.54   41.10
   1   3   0 1521.65   43.50
  -1   3   0 1649.33   41.30
   3  -3   0  355.26   13.20
  -3  -3   0  346.07   12.10
  -3  -3   0  348.37   12.40
   3  -3   0  316.27   12.20
   3  -3   0  337.77   11.40
  -3   3   0  339.77   10.30
  -3   3   0  340.87   12.50
   3   3   0  346.27   12.80
   3   3   0  350.56   17.50
   5  -3   0  304.97   11.80
  -5  -3   0  289.87   11.50
   5  -3   0  301.07   12.20
  -5  -3   0  289.77   10.70
   5   3   0  302.17   12.30
  -5   3   0  308.57   12.60
   5   3   0  295.67   17.50
  -5   3   0  291.67    8.60
  -7  -3   0 1540.75   37.80
   7  -3   0 1530.25   39.80
   7  -3   0 1474.85   39.80
   7  -3   0 1515.05   36.20
  -7  -3   0 1497.55   39.80
  -7   3   0 1513.75   36.30
   7   3   0 1528.75   48.40
   7   3   0 1487.75   40.20
  -7   3   0 1525.45   40.50
  -9  -3   0 1105.59   29.60
   9  -3   0 1160.98   32.90
   9  -3   0 1182.28   31.90
  -9  -3   0 1134.49   32.80
   9  -3   0 1102.89   29.50
  -9   3   0 1170.18   33.60
   9   3   0 1105.69   32.70
   9   3   0 1155.48   42.30
  11  -3   0 1552.74   42.70
  11  -3   0 1540.75   40.90
 -11  -3   0 1499.35   42.20
  11  -3   0 1471.55   40.70
 -11  -3   0 1460.25   38.40
  11   3   0 1575.84   53.89
 -11   3   0 1450.55   42.90
  11   3   0 1543.95   42.90
  13  -3   0  950.10   32.80
 -13  -3   0  988.90   32.90
  13  -3   0 1063.09   33.40
 -13  -3   0 1020.40   28.40
  13  -3   0 1037.80   31.00
  13   3   0 1066.69   45.80
 -13   3   0 1045.30   34.20
  13   3   0 1040.10   33.70
  15  -3   0  554.44   21.30
 -15  -3   0  498.85   18.40
 -15  -3   0  614.44   24.90
 -15   3   0  539.25   25.40
  15   3   0  504.95   24.40
  15   3   0  566.94   35.80
 -17  -3   0  225.88   17.80
  17  -3   0  228.08   16.20
 -17   3   0  221.58   19.00
  17   3   0  248.68   29.00
  19  -3   0   52.29   10.70
 -19  -3   0   68.59   14.60
  19   3   0   74.49   22.70
 -19   3   0   57.39   14.50
  21  -3   0   12.00   11.00
 -21  -3   0   21.30   14.60
  21   3   0    2.80   19.30
 -21   3   0   18.50   15.20
 -23  -3   0   46.00   17.30
 -23   3   0   87.79   19.80
  23   3   0   42.40   24.30
 -25  -3   0   54.79   20.20
 -25   3   0   66.39   21.30
   0  -4   0  321.07   14.40
   0  -4   0  339.07   12.50
   0   4   0  351.16   13.20
   0   4   0  355.06   15.30
   2  -4   0  171.28    8.70
   2  -4   0  150.08   10.50
  -2  -4   0  166.98   10.10
   2  -4   0  184.18   10.00
  -2  -4   0  165.38    9.30
   2   4   0  194.38   10.20
   2   4   0  198.68   13.60
  -2   4   0  188.58   10.10
  -2   4   0  180.98    9.30
  -4  -4   0  139.99    9.00
   4  -4   0  158.88    8.60
  -4  -4   0  147.49    9.30
   4  -4   0  143.09    9.30
   4  -4   0  146.79   10.10
  -4   4   0  135.59    6.70
   4   4   0  168.18   10.00
  -4   4   0  150.28   10.00
   4   4   0  145.39   13.40
   6  -4   0  251.07   12.50
   6  -4   0  229.78   12.00
  -6  -4   0  239.18   10.80
  -6  -4   0  239.88   11.70
   6   4   0  210.98   12.20
   6   4   0  228.08   17.80
  -6   4   0  205.08   11.80
  -6   4   0  223.98    7.70
   8  -4   0  191.98   11.90
  -8  -4   0  187.98    9.80
   8  -4   0  198.98    7.30
  -8  -4   0  209.58   12.00
   8  -4   0  197.18   12.00
   8   4   0  182.18   12.10
   8   4   0  233.38   19.80
  -8   4   0  189.88   12.70
 -10  -4   0 1274.47   38.30
  10  -4   0 1278.17   33.80
  10  -4   0 1428.96   38.50
  10  -4   0 1376.66   38.90
 -10  -4   0 1344.17   35.60
  10   4   0 1344.17   39.20
 -10   4   0 1357.26   39.80
  10   4   0 1318.77   48.70
 -12  -4   0 1098.99   34.70
  12  -4   0 1069.29   31.80
 -12  -4   0 1105.69   30.80
  12  -4   0 1137.39   35.30
  12  -4   0 1118.69   34.00
 -12   4   0 1087.59   35.90
  12   4   0 1285.97   47.70
  12   4   0 1071.89   35.30
 -14  -4   0  581.84   25.10
  14  -4   0  578.34   22.70
 -14  -4   0  546.15   19.30
  14   4   0  555.44   25.30
 -14   4   0  539.55   25.50
  14   4   0  612.44   36.10
 -16  -4   0    1.70    9.40
  16  -4   0   12.00    8.80
 -16   4   0   -9.20   10.20
  16   4   0   11.80   16.90
  16   4   0   14.00   10.20
 -18  -4   0   -1.10   11.20
  18  -4   0   -5.00    8.60
  18   4   0  -11.30   16.80
 -18   4   0    3.60   12.00
  20  -4   0   34.70   11.20
 -20  -4   0   35.10   14.80
 -20   4   0   38.80   15.60
  20   4   0   35.10   22.40
 -22  -4   0   26.60   16.70
  22   4   0   29.70   23.60
 -22   4   0   34.10   17.10
 -24  -4   0   51.59   20.10
  24   4   0   50.69   27.70
 -24   4   0   87.69   21.30
 -26  -4   0   35.90   21.70
 -26   4   0    3.70   20.30
  26   4   0   29.50   33.10
  -1  -5   0   29.40    5.50
  -1  -5   0   35.50    7.00
   1  -5   0   29.40    6.50
   1  -5   0   28.00    5.20
  -1   5   0   34.90    6.50
  -1   5   0   31.20    6.60
   1   5   0   52.19    8.70
  -1   5   0   33.80    5.60
   1   5   0   30.40    6.20
   3  -5   0   34.10    6.50
  -3  -5   0   13.00    5.40
  -3  -5   0   20.70    5.60
   3  -5   0   25.10    6.80
   3  -5   0   32.60    5.50
  -3   5   0   36.70    6.40
   3   5   0   33.80    9.30
   3   5   0   33.70    6.40
  -3   5   0   24.90    5.30
   5  -5   0   63.69    8.70
  -5  -5   0   65.79    7.50
   5  -5   0   62.29    6.90
   5  -5   0   64.39    7.80
  -5  -5   0   58.89    7.50
  -5   5   0   65.19    5.40
  -5   5   0   71.89    8.60
   5   5   0   54.99    7.60
   5   5   0   66.09   11.70
   7  -5   0  357.86   16.80
  -7  -5   0  346.57   16.30
  -7  -5   0  387.46   16.00
   7  -5   0  416.56   18.00
  -7   5   0  402.86   18.00
  -7   5   0  383.06   11.80
   7   5   0  383.76   23.80
   7   5   0  412.06   18.10
   9  -5   0  171.58   13.00
  -9  -5   0  167.98   12.10
  -9  -5   0  167.68   11.10
   9  -5   0  187.48   13.40
   9   5   0  178.18   18.90
   9   5   0  164.88   13.40
  -9   5   0  191.08   14.10
 -11  -5   0  113.99   11.40
 -11  -5   0  121.49    9.60
  11  -5   0  103.89   11.20
  11   5   0  115.99   12.10
  11   5   0   99.89   17.00
 -11   5   0  107.49   12.10
 -13  -5   0   -0.80    8.00
  13  -5   0   10.80    8.30
 -13  -5   0   -5.20    5.50
 -13   5   0    3.10    9.30
  13   5   0   13.80    8.70
  13   5   0    9.40   14.10
 -15  -5   0   71.89   12.30
  15  -5   0   59.49   10.90
  15   5   0   57.69   13.00
 -15   5   0   56.39   13.10
  15   5   0   66.49   19.70
  17  -5   0   13.00   10.10
 -17  -5   0   -2.30   11.10
  17   5   0    4.80   18.30
 -17   5   0    6.50   12.90
  19  -5   0   12.50   11.00
 -19  -5   0  -29.70   12.40
 -19   5   0  -15.30   13.70
  19   5   0   -1.40   18.20
 -21  -5   0   36.10   16.50
  21  -5   0   -4.70   11.90
  21   5   0    0.20   21.60
 -21   5   0    5.00   16.30
 -23  -5   0  -10.50   17.40
  23   5   0  -10.20   24.70
 -23   5   0  -14.90   18.20
 -25  -5   0   -4.70   19.60
  25   5   0   42.50   29.00
 -25   5   0  -24.60   19.30
   0  -6   0  326.77   14.70
   0  -6   0  343.97   17.50
   0   6   0  315.07   15.40
   0   6   0  276.67   16.80
   2  -6   0  227.38   12.40
  -2  -6   0  215.18   12.90
   2  -6   0  246.98   15.80
  -2  -6   0  217.88   14.70
  -2   6   0  195.78   13.60
  -2   6   0  223.78   13.10
   2   6   0  235.48   14.00
   2   6   0  203.18   16.80
  -2   6   0  230.58   13.60
   4  -6   0   13.90    5.70
   4  -6   0    3.10    6.60
   4  -6   0   20.50    7.20
  -4  -6   0   24.70    6.70
  -4  -6   0    9.00    6.00
  -4   6   0   13.60    5.40
   4   6   0    8.00    9.30
  -4   6   0   15.10    7.10
   4   6   0    7.30    5.90
  -6  -6   0    1.10    6.00
   6  -6   0    0.30    6.40
   6  -6   0    3.80    6.70
   6  -6   0   -6.40    5.30
  -6  -6   0   12.20    6.40
   6   6   0   -1.20    6.20
  -6   6   0    6.00    3.70
  -6   6   0    6.40    6.80
   6   6   0   -2.40    9.00
  -8  -6   0   -1.10    5.70
   8  -6   0   -9.50    6.80
  -8  -6   0   15.80    7.30
   8  -6   0   12.40    7.60
   8   6   0    3.80    7.50
   8   6   0   18.40   11.20
  -8   6   0    0.80    6.90
  -8   6   0   11.30    3.50
  10  -6   0   29.70    9.00
 -10  -6   0   27.90    8.60
 -10  -6   0   26.60    7.30
  10   6   0   20.70    8.90
 -10   6   0   21.90    9.30
  10   6   0   37.30   13.70
  12  -6   0  411.46   21.00
 -12  -6   0  379.66   18.50
 -12  -6   0  414.06   21.30
  12   6   0  418.36   30.90
  12   6   0  367.16   22.40
 -12   6   0  403.86   23.30
 -14  -6   0  517.05   26.00
  14  -6   0  477.05   23.80
 -14  -6   0  453.05   23.70
  14   6   0  470.45   25.50
  14   6   0  471.15   35.00
 -14   6   0  457.75   27.40
  16  -6   0  196.48   17.80
 -16  -6   0  239.38   19.80
 -16   6   0  214.88   20.80
  16   6   0  220.08   30.50
  16   6   0  236.48   29.10
  18  -6   0   31.30   12.90
 -18  -6   0   35.40   14.70
  18   6   0   52.89   22.60
 -18   6   0   14.80   14.90
  20  -6   0   -5.50   12.50
 -20  -6   0   16.60   16.00
  20   6   0  -11.60   21.80
 -20   6   0  -11.80   15.80
 -22  -6   0   20.10   17.30
  22  -6   0   35.40   14.60
 -22   6   0   23.60   19.30
  22   6   0    1.20   23.70
 -24  -6   0  -20.30   18.10
 -24   6   0   -1.80   20.20
  24   6   0   55.49   29.60
  -1  -7   0  473.55   22.40
  -1  -7   0  487.75   20.40
   1  -7   0  494.85   19.90
   1  -7   0  548.55   23.90
  -1   7   0  496.25   21.30
  -1   7   0  513.35   22.10
   1   7   0  565.34   24.90
   1   7   0  497.35   21.60
  -1   7   0  480.75   22.10
   3  -7   0   73.49    8.80
   3  -7   0   92.19   12.20
  -3  -7   0   90.39   11.50
  -3  -7   0   79.99    9.50
  -3   7   0   73.49    9.50
  -3   7   0   97.59   11.10
   3   7   0  104.39   14.50
  -3   7   0   82.99    9.50
   3   7   0   73.29   10.40
  -5  -7   0  374.26   19.40
   5  -7   0  373.16   17.60
  -5  -7   0  418.46   19.50
   5  -7   0  363.56   20.50
   5  -7   0  361.26   19.70
  -5   7   0  381.46   15.70
   5   7   0  391.46   20.20
  -5   7   0  411.56   20.10
   5   7   0  464.85   26.10
   7  -7   0  471.45   22.80
  -7  -7   0  425.36   20.30
   7  -7   0  446.16   19.90
  -7  -7   0  400.86   20.70
   7   7   0  405.66   27.00
  -7   7   0  506.55   22.80
  -7   7   0  405.96   15.10
   7   7   0  461.55   22.40
  -9  -7   0  989.30   33.30
   9  -7   0 1025.70   36.00
  -9  -7   0  976.10   34.20
  -9   7   0 1000.90   35.40
   9   7   0  975.40   35.60
   9   7   0 1006.00   43.10
  11  -7   0  996.70   35.80
 -11  -7   0  932.61   34.80
 -11  -7   0  954.80   32.40
  11   7   0  955.90   44.20
  11   7   0  957.40   36.00
 -11   7   0  933.71   35.80
 -13  -7   0  586.04   28.00
 -13  -7   0  536.05   24.30
  13  -7   0  571.04   27.50
 -13   7   0  636.74   30.90
  13   7   0  705.73   39.80
  13   7   0  578.64   29.50
 -15  -7   0  127.79   16.20
  15  -7   0  127.39   15.80
  15   7   0  139.19   24.30
 -15   7   0  135.69   18.80
  15   7   0  119.89   16.40
  17  -7   0   -0.50   11.80
 -17  -7   0   -6.20   12.80
 -17   7   0  -30.20   13.10
  17   7   0    2.00   19.50
 -19  -7   0    3.50   15.60
  19  -7   0   -8.40   12.90
  19   7   0   20.50   22.00
 -19   7   0   -7.10   16.30
  21  -7   0   -9.00   14.00
 -21  -7   0  -23.70   16.60
  21   7   0   -6.20   22.70
 -21   7   0  -19.70   17.40
 -23  -7   0  -24.30   18.70
  23  -7   0   -2.70   15.20
  23   7   0   25.90   27.50
 -23   7   0  -22.20   19.30
   0  -8   0  106.49   13.40
   0  -8   0  172.78   13.20
   0   8   0  153.68   15.60
   0   8   0  172.58   14.20
   0   8   0  149.49   14.50
   2  -8   0   95.59   13.00
  -2  -8   0  109.19   13.20
   2  -8   0   93.59   10.80
  -2  -8   0  108.69   11.70
  -2   8   0  120.39   12.50
   2   8   0  120.49   13.30
  -2   8   0  103.19   12.50
   2   8   0   92.29   13.90
  -2   8   0   68.39   11.70
  -4  -8   0  179.28   16.10
   4  -8   0  190.18   13.80
   4  -8   0  182.48   16.70
  -4  -8   0  198.58   14.80
  -4   8   0  212.98   16.20
   4   8   0  205.68   16.40
   4   8   0  204.08   20.40
  -4   8   0  202.18   14.30
  -4   8   0  203.78   16.10
  -6  -8   0   64.59   10.90
   6  -8   0   56.69   10.10
   6  -8   0   36.90   10.80
  -6  -8   0   60.79   10.70
  -6   8   0   59.69   11.90
   6   8   0   63.49   12.20
   6   8   0   56.69   15.10
  -6   8   0   55.09    8.00
   8  -8   0  109.49   14.40
  -8  -8   0  110.89   13.60
   8  -8   0  101.39   12.00
  -8  -8   0   99.39   12.80
   8   8   0  100.19   13.70
  -8   8   0  103.99   14.20
   8   8   0  101.69   18.20
  10  -8   0  154.28   17.00
 -10  -8   0  141.59   14.30
 -10  -8   0  143.69   15.50
  10   8   0  171.88   17.20
  10   8   0  153.08   21.80
 -10   8   0  121.29   15.50
 -12  -8   0  322.07   23.20
 -12  -8   0  222.98   17.70
  12  -8   0  259.27   21.20
  12   8   0  264.47   21.80
  12   8   0  273.97   29.00
 -12   8   0  290.37   22.60
  14  -8   0  331.67   24.40
 -14  -8   0  366.36   25.40
  14   8   0  364.16   33.90
 -14   8   0  388.16   26.90
  14   8   0  327.57   24.90
  16  -8   0  124.59   17.50
 -16  -8   0  104.89   17.50
  16   8   0  101.49   24.70
 -16   8   0  115.69   19.50
 -18  -8   0   85.99   18.90
  18  -8   0   48.40   15.70
 -18   8   0   70.09   19.30
  18   8   0   99.69   26.60
 -20  -8   0   40.90   18.40
  20  -8   0    7.20   15.30
 -20   8   0   -6.30   19.00
  20   8   0   13.90   23.80
  22  -8   0    9.60   16.30
 -22  -8   0  -19.10   18.00
 -22   8   0    9.10   21.50
  22   8   0   38.60   27.60
  -1  -9   0  417.16   24.30
   1  -9   0  398.26   21.40
   1  -9   0  427.16   24.90
  -1  -9   0  421.56   22.40
  -1   9   0  406.66   23.40
  -1   9   0  362.76   23.30
   1   9   0  412.86   23.70
  -1   9   0  381.16   23.00
   1   9   0  381.26   25.80
  -3  -9   0  450.35   23.50
   3  -9   0  471.15   22.60
   3  -9   0  467.85   25.80
  -3  -9   0  466.95   25.00
  -3   9   0  478.95   24.80
  -3   9   0  393.56   24.10
  -3   9   0  452.85   22.30
   3   9   0  423.26   24.70
   3   9   0  481.65   29.00
  -5  -9   0  197.58   17.70
   5  -9   0  255.47   20.60
  -5  -9   0  221.58   17.30
   5  -9   0  222.58   16.40
   5   9   0  214.18   18.80
  -5   9   0  217.48   17.60
   5   9   0  200.68   22.30
  -5   9   0  215.88   18.40
   7  -9   0  108.69   12.90
  -7  -9   0  119.09   14.40
   7  -9   0   80.29   14.30
  -7  -9   0  115.49   14.80
   7   9   0   80.39   17.70
   7   9   0   90.09   14.50
  -7   9   0  109.09   15.30
   9  -9   0   59.59   12.30
  -9  -9   0   74.19   12.60
   9  -9   0   62.49   14.40
  -9  -9   0   64.79   13.40
   9   9   0   31.60   16.90
  -9   9   0   88.89   15.00
   9   9   0   73.89   14.80
 -11  -9   0   -7.30   11.70
 -11  -9   0   11.90    9.80
  11  -9   0  -33.70   10.50
 -11   9   0   27.90   14.30
  11   9   0  -17.60   14.50
  11   9   0    7.30   12.30
 -13  -9   0    9.20   13.10
  13  -9   0   -6.90   12.00
  13   9   0    5.30   17.80
 -13   9   0   21.40   14.50
  13   9   0   24.30   14.00
  15  -9   0   25.70   14.80
 -15  -9   0   51.29   16.10
  15   9   0   25.80   20.30
 -15   9   0   18.70   16.50
 -17  -9   0   -5.50   16.00
  17  -9   0  -14.00   14.00
 -17   9   0    2.90   17.00
  17   9   0   33.30   22.40
 -19  -9   0   68.19   20.70
  19  -9   0   83.99   19.40
 -19   9   0   25.00   19.70
  19   9   0   76.89   27.40
 -21  -9   0   69.19   22.70
  21  -9   0   46.20   18.60
  21   9   0   17.80   25.90
 -21   9   0   27.20   21.70
   0 -10   0  595.74   30.20
   0 -10   0  568.14   27.20
   0  10   0  598.94   31.30
   0  10   0  573.74   30.40
   0  10   0  542.15   29.90
   2 -10   0  507.05   25.20
  -2 -10   0  486.85   25.90
   2 -10   0  475.35   28.90
  -2 -10   0  535.25   28.60
   2  10   0  423.56   27.90
  -2  10   0  509.45   26.30
   2  10   0  524.35   30.70
  -2  10   0  477.85   28.00
  -2  10   0  449.95   27.80
  -4 -10   0  218.08   19.60
  -4 -10   0  166.08   17.10
   4 -10   0  226.28   20.40
   4 -10   0  201.58   16.90
   4  10   0  240.58   24.10
   4  10   0  202.68   19.10
  -4  10   0  187.78   18.70
  -4  10   0  214.58   19.40
  -6 -10   0   54.89   13.80
   6 -10   0   57.09   14.30
  -6 -10   0   82.59   14.00
   6 -10   0   56.59   12.30
  -6  10   0   65.39   14.60
   6  10   0   76.29   14.90
  -6  10   0   53.19   14.40
   6  10   0   77.89   18.10
  -8 -10   0   15.60   10.90
  -8 -10   0   11.40   12.40
   8 -10   0   -8.40   11.40
   8 -10   0   -2.80   10.60
   8  10   0  -24.70   14.10
  -8  10   0   16.80   13.00
   8  10   0    4.50   12.80
 -10 -10   0   50.59   14.30
 -10 -10   0   29.00   12.30
  10 -10   0   15.10   13.60
  10  10   0   41.00   15.30
  10  10   0   36.90   18.30
 -10  10   0   33.60   14.70
  12 -10   0   -2.90   13.00
 -12 -10   0    4.90   13.90
  12  10   0  -13.20   16.90
  12  10   0    2.30   13.80
 -12  10   0  -21.00   13.60
 -14 -10   0    6.20   16.00
  14 -10   0    0.40   14.20
 -14  10   0   21.80   17.10
  14  10   0  -12.90   18.80
 -16 -10   0   25.50   16.90
  16 -10   0   49.30   17.30
  16  10   0   50.09   23.00
 -16  10   0   42.30   19.40
  18 -10   0   14.90   17.40
 -18 -10   0   14.10   19.20
 -18  10   0  -15.20   17.70
  18  10   0   18.50   23.80
  20 -10   0   48.10   19.30
 -20  10   0   42.00   23.10
  -1 -11   0  759.92   35.80
   1 -11   0  730.93   31.90
  -1 -11   0  715.23   31.90
   1 -11   0  693.13   34.60
  -1  11   0  731.03   35.60
   1  11   0  679.93   35.30
  -1  11   0  660.73   34.60
   1  11   0  725.63   36.80
   1  11   0  671.03   34.80
  -1  11   0  672.03   32.80
   3 -11   0   79.89   14.00
  -3 -11   0  122.59   17.20
  -3 -11   0   78.49   14.90
   3 -11   0   95.39   16.70
   3  11   0  100.49   17.50
  -3  11   0   95.29   17.90
  -3  11   0  108.49   17.20
   3  11   0   89.59   18.80
   5 -11   0  106.69   15.00
  -5 -11   0  111.19   16.60
  -5 -11   0  133.69   17.00
   5 -11   0   98.89   17.10
   5  11   0  131.39   20.50
  -5  11   0  122.09   19.00
   5  11   0  140.49   19.40
  -5  11   0  113.19   17.50
  -7 -11   0   43.70   13.90
   7 -11   0   15.30   12.00
  -7 -11   0    9.00   13.60
   7 -11   0   38.80   14.60
  -7  11   0   15.50   14.40
  -7  11   0   26.20   14.60
   7  11   0   37.40   14.60
   7  11   0   30.30   18.00
   9 -11   0   13.80   14.10
   9 -11   0   -1.60   12.60
  -9 -11   0   20.90   14.40
  -9 -11   0    6.50   12.20
   9  11   0   18.90   15.40
  -9  11   0   -2.50   14.20
   9  11   0  -18.30   16.40
 -11 -11   0   13.50   15.00
  11 -11   0   15.40   14.90
 -11  11   0   26.10   16.10
  11  11   0   26.30   20.10
  11  11   0    4.30   18.70
 -13 -11   0    4.40   15.60
  13 -11   0    0.80   15.80
  13  11   0   20.70   21.20
 -13  11   0    6.30   17.00
  15 -11   0   36.70   17.60
 -15 -11   0   38.40   18.70
 -15  11   0   47.20   20.50
  15  11   0   52.09   24.00
  17 -11   0   21.00   17.80
 -17 -11   0  -17.70   18.50
 -17  11   0  -21.50   19.30
  17  11   0  -13.00   21.60
   0 -12   0   83.29   16.50
   0 -12   0   62.69   14.70
   0  12   0   61.49   17.20
   0  12   0   56.19   17.50
  -2 -12   0   63.39   15.70
   2 -12   0   58.39   14.70
  -2 -12   0   49.80   14.20
   2 -12   0   60.39   15.90
  -2  12   0   40.30   16.20
   2  12   0   31.20   16.10
   2  12   0   69.59   17.70
   2  12   0   52.69   16.80
  -2  12   0   85.59   17.20
  -4 -12   0   26.30   14.40
   4 -12   0   21.70   15.00
  -4 -12   0   -4.30   12.70
   4 -12   0   21.10   12.80
   4  12   0   32.90   15.40
   4  12   0   28.50   17.50
  -4  12   0   34.00   16.10
  -4  12   0   13.70   16.10
  -6 -12   0   13.00   14.70
  -6 -12   0   19.80   13.70
   6 -12   0   11.00   12.90
   6 -12   0   32.00   15.00
  -6  12   0   29.30   15.50
   6  12   0   31.30   15.90
  -6  12   0   -4.90   14.60
   6  12   0   14.20   17.10
  -8 -12   0   96.99   18.60
   8 -12   0   48.40   17.40
   8 -12   0   87.89   16.40
  -8 -12   0   66.89   15.60
  -8  12   0   74.99   18.80
   8  12   0   83.29   18.80
  -8  12   0   82.79   18.40
   8  12   0   66.79   20.60
 -10 -12   0   61.49   17.20
  10 -12   0   84.79   19.00
  10  12   0   58.49   22.20
 -10  12   0   88.29   19.60
 -10  12   0  111.09   19.10
 -12 -12   0   25.40   18.20
  12 -12   0   98.79   19.90
 -12  12   0   -1.60   17.70
  12  12   0   29.40   21.00
 -14 -12   0  141.89   22.90
  14 -12   0  102.99   20.80
  14  12   0  131.69   28.20
 -14  12   0  120.39   23.70
   1 -13   0    8.20   13.00
   1 -13   0   19.80   15.00
  -1 -13   0   30.40   16.00
  -1 -13   0   16.90   14.10
  -1  13   0   20.20   16.00
  -1  13   0   10.00   17.30
   1  13   0   17.80   16.80
   1  13   0   12.60   17.20
   3 -13   0   24.00   14.00
  -3 -13   0   16.90   14.80
   3 -13   0   42.40   16.40
  -3 -13   0   12.60   14.60
   3  13   0   39.20   18.10
   3  13   0   19.90   17.30
  -3  13   0    1.40   16.10
   3  13   0   12.30   16.50
  -3  13   0    6.50   16.60
   5 -13   0  -11.30   13.20
  -5 -13   0   13.30   15.20
   5 -13   0   12.40   15.10
  -5 -13   0    4.80   13.80
  -5  13   0   14.20   18.20
  -5  13   0    7.70   16.90
   5  13   0   33.10   18.70
   5  13   0   -3.80   17.20
   7 -13   0    5.60   15.30
  -7 -13   0    8.90   16.90
  -7 -13   0    1.10   14.40
   7 -13   0   -2.50   14.30
  -7  13   0   -2.20   16.90
  -7  13   0   -9.90   16.80
   7  13   0   23.30   19.50
   7  13   0   33.20   25.00
  -9 -13   0   54.99   18.70
   9 -13   0   44.60   17.30
   9 -13   0   46.90   17.80
   9  13   0   65.69   22.20
  -9  13   0   65.09   25.10
  -9  13   0   79.59   20.60
 -11 -13   0   55.39   19.60
  11 -13   0   62.89   20.20
  11  13   0   55.89   23.20
 -11  13   0   63.09   20.60
  13 -13   0  127.69   22.90
   0 -14   0   37.80   17.10
   0  14   0   35.30   20.90
   2 -14   0   85.19   19.80
  -2 -14   0   54.39   17.60
  -2  14   0   80.39   21.50
   2  14   0   43.40   19.60
  -4 -14   0    1.40   15.30
   4 -14   0   26.70   16.30
  -4  14   0   37.80   20.60
   6 -14   0   82.49   20.10
  -6 -14   0   48.70   17.80
  -6  14   0   61.19   21.10
   6  14   0   71.39   21.70
   8 -14   0   17.10   18.00
   8  14   0   -1.00   21.10
  -8  14   0    5.60   19.30
 -26   0   1   13.70   18.20
 -24   0   1  -19.30   15.20
 -22   0   1   -5.20   13.50
 -20   0   1   10.10   11.20
  20   0  -1   -8.70   16.90
  18   0  -1   12.50   16.00
 -18   0   1   -0.10    9.30
  18   0  -1   -2.20    6.60
 -18   0   1    0.80    7.00
  16   0  -1    6.20    8.70
  16   0  -1    4.80    5.50
 -16   0   1    8.10    7.90
 -16   0   1    8.30    5.60
  16   0  -1    7.00   11.50
  14   0  -1    4.40    8.80
  14   0  -1    2.90    7.80
 -14   0   1    6.80    6.90
 -14   0   1    2.50    4.50
  14   0  -1   11.60    5.00
 -12   0   1    2.90    5.50
  12   0  -1    7.20    6.30
  12   0  -1   12.20    7.50
  12   0  -1    4.20    3.70
  10   0  -1   -4.40    4.80
  10   0  -1   -0.10    5.30
  10   0  -1    1.30    3.00
 -10   0   1   -2.90    4.20
   8   0  -1    1.20    3.40
  -8   0   1   -2.60    3.20
   8   0  -1   -5.60    4.00
   8   0  -1    0.40    2.20
  -6   0   1   13.50    3.30
   6   0  -1    4.70    1.80
   6   0  -1    5.40    2.90
   6   0  -1    3.90    3.50
   4   0  -1   -3.10    1.60
  -4   0   1    1.50    1.80
   4   0  -1    0.80    1.00
  -4   0   1   -0.10    1.70
   4   0  -1   -3.70    1.60
   2   0  -1    0.50    1.10
  -2   0   1   -1.30    1.00
   2   0  -1   -1.20    0.90
  -2   0   1   -1.50    0.90
   0   0   1   -2.20    0.80
   0   0   1   -3.10    0.50
   0   0   1   -3.60    0.60
   2   0   1    0.70    0.40
  -2   0  -1    0.10    1.20
  -2   0  -1    0.20    1.10
   2   0   1    1.10    1.10
  -2   0  -1    0.40    0.60
   2   0   1    0.30    1.70
  -4   0  -1   11.60    2.80
   4   0   1   -2.80    4.40
   4   0   1    9.10    2.20
   4   0   1    9.40    2.70
   6   0   1   -1.10    6.00
   6   0   1    4.80    2.60
  -6   0  -1    8.10    3.50
   6   0   1    8.20    3.20
   8   0   1    1.00    4.00
   8   0   1    3.00    7.10
   8   0   1    0.30    3.10
  -8   0  -1    0.80    3.70
  -8   0  -1   -3.90    3.00
  10   0   1    1.70    3.90
  10   0   1    9.10    8.60
 -10   0  -1   -0.80    3.80
  10   0   1   -2.40    4.70
 -10   0  -1   -3.90    4.50
  12   0   1    1.40    6.10
 -12   0  -1   -7.70    5.60
  12   0   1    7.90   10.30
 -12   0  -1    5.00    4.60
  12   0   1   -0.50    4.40
 -14   0  -1   -1.60    6.90
  14   0   1  -14.00   10.70
  14   0   1    5.20    5.80
  14   0   1    0.90    8.00
 -14   0  -1    7.20    5.60
 -16   0  -1   -6.00    8.30
  16   0   1    5.80    6.80
  16   0   1   10.20   13.70
 -16   0  -1   -2.70    6.40
  18   0   1  -10.90   15.10
 -18   0  -1   -5.00    7.10
 -18   0  -1    0.70   10.20
  18   0   1  -10.30    7.20
 -20   0  -1   -7.00   12.00
 -22   0  -1   -5.00   14.70
 -24   0  -1  -31.00   16.20
 -26   0  -1  -30.90   18.10
 -27  -1   1   11.60   20.50
 -27   1   1    0.20   19.20
 -25  -1   1   10.40   18.10
 -25   1   1   -8.20   17.00
 -23  -1   1   93.79   18.40
 -23   1   1   85.69   18.60
 -21  -1   1   97.89   16.00
  21   1  -1  140.89   26.20
 -21   1   1  124.99   17.70
 -19  -1   1  227.28   18.40
  19  -1  -1  240.68   27.00
  19  -1  -1  244.38   15.80
  19   1  -1  303.17   31.60
 -19   1   1  243.68   19.60
 -17  -1   1  458.55   22.80
  17  -1  -1  458.25   29.30
  17  -1  -1  441.36   18.00
 -17  -1   1  439.56   16.60
  17   1  -1  438.76   17.00
  17   1  -1  411.86   23.30
 -17   1   1  420.56   22.50
  17   1  -1  483.25   33.40
 -15  -1   1  576.64   18.70
  15  -1  -1  599.24   24.40
 -15  -1   1  571.54   23.80
  15  -1  -1  591.54   27.80
  15  -1  -1  607.34   19.70
 -15   1   1  590.84   24.20
  15   1  -1  558.74   24.00
  15   1  -1  562.84   30.60
  15   1  -1  585.44   18.90
 -13  -1   1  403.36   13.90
  13  -1  -1  417.96   20.60
  13  -1  -1  391.86   14.60
  13  -1  -1  417.56   18.80
 -13  -1   1  407.16   18.30
  13   1  -1  417.96   14.10
  13   1  -1  431.16   18.50
  13   1  -1  385.96   23.40
 -13   1   1  429.86   18.70
  11  -1  -1   78.79    6.10
 -11  -1   1   71.79    5.40
  11  -1  -1   75.29    8.10
  11  -1  -1   89.19    9.10
 -11  -1   1   78.09    8.20
  11   1  -1   78.19    8.80
  11   1  -1   58.89    5.10
 -11   1   1   61.99    7.70
  11   1  -1   59.99   10.40
   9  -1  -1  371.36   14.20
  -9  -1   1  343.07   13.80
  -9  -1   1  346.37   10.80
   9  -1  -1  338.87   13.60
   9  -1  -1  352.66   11.60
   9   1  -1  337.87   16.50
  -9   1   1  378.66   14.30
   9   1  -1  348.47   13.90
   9   1  -1  352.26   10.90
   7  -1  -1 1754.12   43.20
   7  -1  -1 1707.43   41.30
  -7  -1   1 1721.43   40.30
   7  -1  -1 1711.73   42.40
  -7  -1   1 1691.23   43.10
   7   1  -1 1719.03   40.40
   7   1  -1 1744.43   45.90
  -7   1   1 1688.13   42.40
   7   1  -1 1713.83   42.90
  -7   1   1 1711.93   43.10
   5  -1  -1 6771.12  153.98
  -5  -1   1 6703.43  155.08
   5  -1  -1 6669.63  154.88
   5  -1  -1 6733.43  154.08
  -5  -1   1 6677.43  152.78
   5   1  -1 6811.92  152.88
   5   1  -1 6648.33  156.68
  -5   1   1 6835.72  154.28
   5   1  -1 6831.02  154.88
  -5   1   1 6948.50  154.98
  -3  -1   1  172.28    6.20
   3  -1  -1  177.48    6.20
   3  -1  -1  157.68    6.20
  -3  -1   1  167.78    4.90
   3   1  -1  174.08    6.90
  -3   1   1  173.08    5.50
   3   1  -1  171.58    5.80
  -3   1   1  173.28    5.80
  -1  -1   1   27.40    2.20
   1  -1  -1   28.10    2.50
   1  -1  -1   27.20    2.40
  -1  -1   1   24.00    1.70
  -1   1   1   21.50    1.90
  -1   1   1   25.20    1.60
   1   1  -1   26.00    1.90
   1   1  -1   17.70    1.70
   1  -1   1   30.50    2.40
  -1  -1  -1   32.30    2.30
  -1  -1  -1   24.80    1.90
   1  -1   1   32.60    2.30
   1  -1   1   29.50    2.10
  -1   1  -1   31.10    2.70
   1   1   1   35.10    3.70
   1   1   1   29.70    2.50
   3  -1   1   71.59    4.00
  -3  -1  -1   84.09    4.00
   3  -1   1   75.19    4.10
  -3  -1  -1   75.89    4.30
  -3   1  -1   78.09    5.10
   3   1   1   82.09    4.70
   3   1   1   93.89    7.90
  -3   1  -1   69.69    4.00
   3   1   1   81.39    4.00
   5  -1   1  829.32   21.40
   5  -1   1  685.93   23.50
  -5  -1  -1  809.52   22.10
  -5  -1  -1  824.72   21.10
   5  -1   1  851.01   22.10
   5   1   1  774.92   27.60
   5   1   1  820.62   22.20
   5   1   1  847.72   21.20
  -5   1  -1  818.02   22.80
   7  -1   1  662.13   18.50
   7  -1   1  573.14   22.30
  -7  -1  -1  651.83   19.80
   7  -1   1  682.13   19.80
  -7  -1  -1  679.13   18.30
   7   1   1  591.64   25.40
  -7   1  -1  636.94   20.20
   7   1   1  660.53   19.90
   7   1   1  664.53   18.30
  -9  -1  -1  313.37   11.70
   9  -1   1  320.37   12.10
   9  -1   1  314.87   13.70
  -9  -1  -1  312.67   13.70
   9  -1   1  286.47   17.50
   9   1   1  308.07   11.80
   9   1   1  300.57   20.60
  -9   1  -1  325.57   14.20
   9   1   1  338.07   14.00
 -11  -1  -1   91.09    7.30
  11  -1   1   61.49   11.90
  11  -1   1   89.79    9.20
 -11  -1  -1   73.59    8.40
  11  -1   1   84.19    7.20
  11   1   1   67.39   13.70
  11   1   1   90.39    8.60
 -11   1  -1   81.19    9.10
  11   1   1   76.59    6.90
 -13  -1  -1   11.10    6.80
  13  -1   1   19.80    6.00
  13  -1   1    3.40   11.00
 -13  -1  -1   21.90    5.70
  13  -1   1    5.30    6.60
  13   1   1   10.60    5.40
  13   1   1    9.90   12.00
 -13   1  -1    6.00    6.90
  13   1   1   23.90    7.90
 -15  -1  -1   53.19   10.00
  15  -1   1   60.99   15.20
  15  -1   1   72.59    8.80
 -15  -1  -1   61.49    7.90
  15   1   1   47.80   16.10
 -15   1  -1   62.09   10.80
  15   1   1   58.39   12.50
  15   1   1   51.29    7.50
 -17  -1  -1  258.97   14.90
  17  -1   1  256.57   26.00
 -17  -1  -1  218.38   17.70
  17  -1   1  271.27   15.90
  17   1   1  273.77   15.40
  17   1   1  282.47   29.50
 -17   1  -1  258.37   19.20
 -17   1  -1  244.48   15.70
  19  -1   1  101.69   11.80
 -19  -1  -1  104.59   15.20
 -19   1  -1   79.49   14.80
  19   1   1  110.89   22.70
 -19   1  -1   70.39   10.90
 -21  -1  -1  287.47   23.50
 -21   1  -1  277.77   23.60
 -23  -1  -1    7.50   15.60
 -23   1  -1    3.10   16.50
 -25  -1  -1   -9.20   18.20
 -25   1  -1    5.00   18.90
 -26  -2   1   27.00   19.80
 -26   2   1   14.20   19.30
 -24  -2   1   -2.10   16.70
  24   2  -1   19.80   24.20
 -24   2   1   47.20   18.60
 -22  -2   1   23.60   15.50
  22   2  -1   45.10   22.10
 -22   2   1   12.80   14.60
  20  -2  -1  194.48   17.90
 -20  -2   1  199.38   18.90
  20   2  -1  196.58   28.60
 -20   2   1  212.58   19.80
 -18  -2   1  977.90   36.80
  18  -2  -1  995.90   31.50
 -18   2   1 1027.70   37.50
  18   2  -1  966.90   40.50
  18   2  -1 1167.08   51.79
 -16  -2   1  682.53   27.70
 -16  -2   1  628.74   20.80
  16  -2  -1  684.53   23.30
  16  -2  -1  665.73   30.60
  16  -2  -1  762.92   31.70
  16   2  -1  671.83   27.60
  16   2  -1  781.42   40.10
  16   2  -1  687.53   21.70
 -16   2   1  690.83   28.10
 -14  -2   1  444.26   15.30
  14  -2  -1  441.16   21.60
 -14  -2   1  489.35   21.20
  14  -2  -1  462.15   20.80
  14  -2  -1  467.15   17.40
 -14   2   1  503.95   21.40
  14   2  -1  485.55   16.10
  14   2  -1  478.65   21.00
  14   2  -1  483.15   28.80
  12  -2  -1  188.68   12.90
  12  -2  -1  186.38   10.40
 -12  -2   1  185.98    8.40
 -12  -2   1  179.68   12.90
  12  -2  -1  181.28   12.30
  12   2  -1  158.38   11.50
  12   2  -1  180.98   17.40
  12   2  -1  170.68    8.80
 -12   2   1  176.68   12.70
 -10  -2   1  186.68   11.50
  10  -2  -1  187.88    9.50
  10  -2  -1  171.18   11.20
  10  -2  -1  197.78   10.10
 -10  -2   1  178.48    7.60
 -10   2   1  188.18   11.30
  10   2  -1  197.48   11.70
  10   2  -1  217.58   16.10
  10   2  -1  185.78    8.20
   8  -2  -1   85.59    6.30
   8  -2  -1   88.49    6.10
  -8  -2   1   73.99    4.70
   8  -2  -1   83.69    7.00
  -8  -2   1   80.99    6.90
  -8   2   1   76.39    7.00
   8   2  -1   99.29   10.50
  -8   2   1   82.39    5.60
   8   2  -1   83.79    6.90
  -6  -2   1   75.29    5.80
  -6  -2   1   76.99    4.30
   6  -2  -1   75.29    4.60
   6  -2  -1   70.29    5.60
   6  -2  -1   71.19    6.10
  -6   2   1   84.69    4.60
   6   2  -1   77.49    8.60
  -6   2   1   67.39    5.80
   6   2  -1   60.39    5.20
   4  -2  -1  362.56   12.10
   4  -2  -1  368.26   12.50
  -4  -2   1  366.86   11.20
  -4  -2   1  364.76   12.10
   4   2  -1  360.56   11.80
   4   2  -1  388.86   15.00
  -4   2   1  375.06   10.50
  -4   2   1  369.46   11.80
  -2  -2   1   29.10    3.50
   2  -2  -1   21.40    3.40
   2  -2  -1   25.30    3.80
  -2  -2   1   21.80    3.00
   2  -2  -1   23.70    2.30
  -2   2   1   14.60    2.60
   2   2  -1   20.80    4.10
   2   2  -1   25.50    3.10
  -2   2   1   22.00    2.70
   0  -2  -1   13.70    2.20
   0  -2  -1   23.40    3.50
   0  -2   1   18.30    2.90
   0  -2   1   14.80    2.50
   0   2   1   19.20    2.80
   0   2  -1   17.20    2.60
   0   2  -1   18.60    3.30
   0   2   1   15.10    3.40
  -2  -2  -1  237.68    8.10
   2  -2   1  240.08    8.70
  -2  -2  -1  251.87    8.60
   2  -2   1  248.18    8.70
  -2   2  -1  236.08    8.20
   2   2   1  257.77   12.50
   2   2   1  236.88    9.20
  -2   2  -1  250.67    9.70
  -4  -2  -1  272.57    9.20
   4  -2   1  274.07    9.80
  -4  -2  -1  258.07    9.50
  -4   2  -1  277.27   11.00
   4   2   1  241.78   15.00
   4   2   1  273.87   10.40
  -4   2  -1  289.67   11.00
  -6  -2  -1 3531.15   80.29
   6  -2   1 2980.90   80.39
  -6  -2  -1 3482.75   81.69
   6  -2   1 3540.85   81.29
   6  -2   1 3602.44   81.79
   6   2   1 3302.67   88.89
  -6   2  -1 3498.45   82.69
   6   2   1 3478.95   82.09
   8  -2   1 2862.81   69.49
  -8  -2  -1 2899.71   67.59
   8  -2   1 2495.65   69.89
   8  -2   1 2898.71   68.69
  -8  -2  -1 2918.41   69.79
   8   2   1 2862.81   69.89
  -8   2  -1 2843.52   70.69
   8   2   1 2837.22   78.59
   8   2   1 2866.21   67.99
  10  -2   1 1104.69   30.70
  10  -2   1 1118.59   32.10
 -10  -2  -1 1109.89   29.60
  10  -2   1  920.91   34.20
 -10  -2  -1 1109.69   32.40
  10   2   1 1150.18   30.10
 -10   2  -1 1111.69   33.50
  10   2   1 1153.08   42.10
  10   2   1 1147.79   32.90
  12  -2   1 1101.69   40.60
  12  -2   1 1242.48   34.40
 -12  -2  -1 1220.88   33.10
 -12  -2  -1 1271.77   37.00
  12  -2   1 1228.98   36.20
 -12   2  -1 1215.28   37.50
  12   2   1 1243.48   47.60
  12   2   1 1264.67   33.70
  12   2   1 1206.28   36.60
 -14  -2  -1   66.29    9.90
  14  -2   1   65.29   14.00
 -14  -2  -1   61.39    7.30
  14  -2   1   77.29    8.80
 -14   2  -1   66.49   10.60
  14   2   1   83.49    8.60
  14   2   1   60.89   10.10
  14   2   1   75.29   17.00
  16  -2   1   71.39    9.80
 -16  -2  -1   84.49   12.10
 -16  -2  -1  101.09    9.40
  16   2   1  108.09   20.70
 -16   2  -1   81.19   12.50
  16   2   1   84.89    9.50
  18  -2   1  613.94   24.70
 -18  -2  -1  662.13   30.10
 -18   2  -1  616.54   30.60
  18   2   1  629.44   31.90
  18   2   1  625.74   42.10
 -20  -2  -1   94.59   15.70
  20  -2   1   82.59   11.90
  20   2   1  106.39   24.50
 -20   2  -1   89.59   16.20
 -20   2  -1   80.49   12.00
 -22  -2  -1   83.99   18.10
 -22   2  -1   37.30   16.90
  22   2   1   76.59   25.40
 -24  -2  -1  -19.00   16.90
 -24   2  -1   13.70   18.20
 -26  -2  -1   59.89   22.20
 -26   2  -1   71.09   22.60
 -27  -3   1  -16.00   20.10
 -27   3   1    7.40   20.40
 -25  -3   1  -23.60   17.50
  25   3  -1   27.50   24.40
 -25   3   1  -20.70   16.90
 -23  -3   1   -8.00   15.20
  23   3  -1   48.70   23.70
 -23   3   1    4.10   15.50
 -21  -3   1   -1.50   13.00
 -21   3   1   -5.50   13.20
  21   3  -1   20.10   20.90
 -19  -3   1   22.10   11.40
  19  -3  -1   16.40    9.10
 -19   3   1    5.40   11.70
  19   3  -1   65.29   22.30
  17  -3  -1  255.37   16.00
 -17  -3   1  256.07   18.30
 -17   3   1  215.28   18.00
  17   3  -1  231.48   18.00
  17   3  -1  251.87   28.20
  15  -3  -1  319.57   19.80
  15  -3  -1  349.07   16.60
 -15  -3   1  371.26   19.90
 -15  -3   1  323.97   13.50
  15  -3  -1  388.36   23.40
  15   3  -1  337.57   20.10
 -15   3   1  380.66   20.70
  15   3  -1  374.16   30.80
  13  -3  -1  381.26   17.00
  13  -3  -1  382.96   19.00
 -13  -3   1  370.66   13.40
 -13  -3   1  384.66   18.60
  13  -3  -1  377.76   16.20
 -13   3   1  414.66   19.30
  13   3  -1  406.86   27.50
  13   3  -1  386.36   19.10
 -11  -3   1  658.83   18.80
 -11  -3   1  655.53   23.20
  11  -3  -1  635.64   21.20
  11  -3  -1  664.93   23.50
  11  -3  -1  633.04   20.30
 -11   3   1  646.04   23.40
  11   3  -1  663.33   23.40
  11   3  -1  677.93   31.10
   9  -3  -1  366.76   12.10
  -9  -3   1  354.96   11.80
   9  -3  -1  346.47   14.00
   9  -3  -1  350.96   15.30
  -9  -3   1  350.86   15.00
   9   3  -1  357.06   14.90
  -9   3   1  368.16   15.20
   9   3  -1  364.56   21.10
  -9   3   1  341.07   11.90
  -7  -3   1   49.99    4.60
  -7  -3   1   50.99    6.00
   7  -3  -1   41.80    5.70
   7  -3  -1   48.00    5.90
   7  -3  -1   53.59    4.20
   7   3  -1   60.39    6.30
  -7   3   1   53.69    4.30
  -7   3   1   55.49    6.30
   7   3  -1   50.69    9.30
  -5  -3   1  520.55   17.00
   5  -3  -1  504.15   16.70
   5  -3  -1  502.75   17.60
  -5  -3   1  528.25   16.00
   5   3  -1  522.25   21.10
  -5   3   1  556.54   16.80
   5   3  -1  524.55   17.00
  -5   3   1  518.05   14.60
  -3  -3   1 1754.72   46.70
   3  -3  -1 1917.61   45.20
   3  -3  -1 1822.52   48.10
  -3  -3   1 1819.82   46.70
   3  -3  -1 1895.81   47.00
  -3   3   1 1888.81   45.50
  -3   3   1 1946.61   46.20
   3   3  -1 1907.51   46.60
   3   3  -1 1868.31   50.49
   1  -3  -1  259.87   11.50
  -1  -3   1  233.18   10.40
   1  -3  -1  241.08    8.60
  -1  -3   1  235.08    9.60
  -1   3   1  251.17   10.70
   1   3  -1  261.27   13.60
   1   3  -1  245.38    9.50
  -1   3   1  228.08    9.60
   1  -3   1  836.72   24.70
  -1  -3  -1  904.01   23.40
   1  -3   1  882.11   23.80
  -1  -3  -1  898.01   25.20
   1   3   1  849.52   27.20
  -1   3  -1  952.10   25.40
  -1   3  -1  836.32   24.50
  -1   3  -1  905.31   24.10
   1   3   1  907.81   24.90
   3  -3   1 1718.13   43.20
  -3  -3  -1 1663.23   42.30
  -3  -3  -1 1640.34   41.90
   3  -3   1 1707.33   42.30
   3   3   1 1706.03   43.50
  -3   3  -1 1725.23   42.80
  -3   3  -1 1782.52   43.80
   3   3   1 1603.44   47.90
   5  -3   1  650.53   19.70
  -5  -3  -1  632.14   18.40
   5  -3   1  620.34   19.10
  -5  -3  -1  623.14   19.00
   5   3   1  641.04   20.30
   5   3   1  620.24   26.00
  -5   3  -1  664.83   20.90
   7  -3   1  498.35   17.10
  -7  -3  -1  498.15   17.40
  -7  -3  -1  511.65   15.70
   7  -3   1  497.05   17.20
   7   3   1  544.65   25.40
  -7   3  -1  475.55   18.20
   7   3   1  478.75   17.80
   9  -3   1   53.09    6.90
  -9  -3  -1   65.49    6.20
   9  -3   1   53.39    7.20
   9  -3   1   40.70    7.00
  -9  -3  -1   65.59    7.60
  -9   3  -1   52.99    7.90
   9   3   1   46.60   11.90
   9   3   1   50.39    7.40
 -11  -3  -1   13.80    4.80
  11  -3   1    5.10    7.50
  11  -3   1    6.90    6.60
 -11  -3  -1   12.80    6.50
  11  -3   1    0.10    5.60
  11   3   1    3.90    6.50
  11   3   1    4.30   11.40
 -11   3  -1   11.90    6.90
  13  -3   1   27.60   10.40
 -13  -3  -1   44.00    6.70
 -13  -3  -1   39.80    8.90
  13  -3   1   33.10    7.50
  13   3   1   35.10    9.00
  13   3   1   41.60   15.00
 -13   3  -1   38.70    9.90
  15  -3   1   -5.10    6.80
 -15  -3  -1    2.80    8.50
 -15  -3  -1   -6.10    5.50
 -15   3  -1    9.20    9.70
  15   3   1    0.40    8.50
  15   3   1    5.80   15.10
  17  -3   1    6.30    8.50
 -17  -3  -1  -12.40    9.50
  17   3   1   18.40   16.90
 -17   3  -1    4.70   11.40
  19  -3   1   33.90   10.60
 -19  -3  -1   60.89   14.60
 -19   3  -1   42.10   14.80
  19   3   1   20.60   19.10
 -21  -3  -1   -0.10   14.50
  21  -3   1   -4.40   10.00
  21   3   1  -13.40   19.30
 -21   3  -1   -5.20   15.20
 -23  -3  -1    6.90   16.70
  23   3   1   15.30   22.60
 -23   3  -1  -22.60   16.60
 -25  -3  -1    7.70   19.40
 -25   3  -1   11.20   20.60
 -26  -4   1   39.80   20.60
  26   4  -1   72.49   30.00
 -26   4   1   43.60   20.70
 -24  -4   1    2.40   17.60
  24   4  -1   35.10   24.60
 -24   4   1    6.30   17.50
 -22  -4   1   20.10   15.70
  22   4  -1   -8.60   21.00
 -22   4   1   25.30   16.60
 -20  -4   1   -4.90   12.40
  20  -4  -1   -5.40    9.40
  20   4  -1   -7.90   18.90
 -20   4   1   27.70   14.10
  18  -4  -1   39.30   10.10
 -18  -4   1   21.50   11.40
 -18   4   1   19.50   12.30
  18   4  -1   61.39   21.30
  18   4  -1   18.10   12.00
 -16  -4   1  230.58   17.20
  16  -4  -1  206.48   15.80
 -16   4   1  231.68   18.30
  16   4  -1  239.08   28.00
  16   4  -1  197.58   16.60
  14  -4  -1    6.10    7.10
 -14  -4   1    3.10    7.70
 -14  -4   1   19.60    5.50
  14   4  -1    7.30    8.50
 -14   4   1    3.50    9.10
  14   4  -1  -14.20   13.20
  12  -4  -1   55.89    9.30
  12  -4  -1   38.30    7.80
 -12  -4   1   61.99    6.30
  12  -4  -1   50.19    6.60
 -12  -4   1   43.00    8.60
  12   4  -1   50.59    9.50
 -12   4   1   48.50    9.40
  12   4  -1   72.09   15.80
 -10  -4   1   76.59    6.60
  10  -4  -1   65.89    8.60
  10  -4  -1   66.39    5.70
  10  -4  -1   61.79    8.60
 -10  -4   1   82.59    9.10
  10   4  -1   60.69    8.40
 -10   4   1   65.99    5.60
  10   4  -1   78.59   14.20
 -10   4   1   63.19    8.70
  -8  -4   1 1079.79   30.10
  -8  -4   1 1103.49   32.30
   8  -4  -1 1096.49   28.00
   8  -4  -1 1158.08   32.80
   8  -4  -1 1095.69   32.30
   8   4  -1 1133.89   40.40
   8   4  -1 1059.79   32.20
  -8   4   1 1116.09   32.40
  -8   4   1 1114.19   28.40
   6  -4  -1 1070.49   31.10
  -6  -4   1 1106.59   30.30
   6  -4  -1 1147.49   32.30
  -6  -4   1 1098.49   31.20
  -6   4   1 1080.49   30.90
  -6   4   1 1045.80   27.70
   6   4  -1 1069.49   37.60
   6   4  -1 1077.09   31.40
  -4  -4   1 1150.88   32.00
   4  -4  -1 1159.38   30.10
  -4  -4   1 1067.39   31.80
   4  -4  -1 1161.88   33.80
   4  -4  -1 1149.39   32.20
   4   4  -1 1147.09   32.10
  -4   4   1 1183.98   31.70
  -4   4   1 1147.19   29.90
   4   4  -1 1129.59   37.20
  -2  -4   1  351.36   13.50
  -2  -4   1  346.07   14.40
   2  -4  -1  343.27   14.10
   2  -4  -1  358.26   15.50
   2  -4  -1  333.47   11.80
  -2   4   1  336.47   13.00
  -2   4   1  329.27   13.30
   2   4  -1  355.86   13.50
   2   4  -1  350.66   17.10
   0  -4   1    8.60    4.40
   0  -4   1    5.50    3.50
   0  -4  -1    8.30    4.50
   0  -4  -1    8.10    3.30
   0   4  -1    8.40    5.40
   0   4   1    6.50    3.90
   0   4  -1    6.50    3.60
   0   4  -1    4.50    4.50
   0   4   1    7.00    5.10
   2  -4   1  185.88   10.70
   2  -4   1  202.68    9.40
  -2  -4  -1  161.18   10.00
  -2  -4  -1  176.18    9.10
  -2   4  -1  194.68   11.70
  -2   4  -1  202.88   11.00
   2   4   1  176.78   10.40
  -2   4  -1  187.08    9.30
   2   4   1  171.28   13.30
  -4  -4  -1  410.86   14.30
   4  -4   1  392.76   14.20
  -4  -4  -1  390.76   14.60
   4  -4   1  344.37   14.10
   4  -4   1  396.76   15.40
   4   4   1  373.16   15.30
  -4   4  -1  382.06   11.00
   4   4   1  370.26   20.20
  -4   4  -1  372.66   15.60
   6  -4   1    0.90    4.70
   6  -4   1    1.50    4.40
  -6  -4  -1    5.90    4.10
   6  -4   1    2.90    4.60
  -6  -4  -1    5.20    4.30
  -6   4  -1    5.10    5.20
   6   4   1    3.30    5.30
   6   4   1    7.30    8.20
  -8  -4  -1   23.10    5.00
   8  -4   1   11.80    5.50
   8  -4   1   16.80    6.20
  -8  -4  -1   20.90    5.90
  -8   4  -1    4.30    6.00
   8   4   1   16.40    5.70
   8   4   1   25.40   10.20
  10  -4   1   10.50    6.80
  10  -4   1    1.20    5.90
 -10  -4  -1   14.60    6.30
 -10  -4  -1    3.40    4.60
  10   4   1    9.50   10.70
 -10   4  -1   12.50    7.40
  10   4   1   -2.30    6.70
  12  -4   1   65.69    9.20
 -12  -4  -1   78.69   10.50
 -12  -4  -1   68.19    7.70
  12   4   1   79.49   16.90
  12   4   1   80.09   11.10
 -12   4  -1   67.79   11.20
  14  -4   1   34.20    8.90
 -14  -4  -1   26.60    9.40
 -14  -4  -1   29.00    7.10
  14   4   1   38.60   16.80
 -14   4  -1   22.90   11.00
  14   4   1   33.30   10.00
 -16  -4  -1  100.39   13.20
  16  -4   1   94.59   12.00
 -16  -4  -1   76.39   13.00
 -16   4  -1   99.79   15.40
  16   4   1  102.69   22.40
 -18  -4  -1  225.98   20.00
  18  -4   1  216.48   16.80
 -18   4  -1  216.48   21.20
  18   4   1  242.68   30.00
  20  -4   1  164.08   16.20
 -20  -4  -1  137.49   19.50
  20   4   1  180.28   30.40
 -20   4  -1  172.98   21.60
  22  -4   1   43.10   13.80
 -22  -4  -1   41.90   17.50
  22   4   1   47.70   25.40
 -22   4  -1   19.10   18.40
 -24  -4  -1   40.90   20.20
  24   4   1    4.20   24.30
 -24   4  -1   21.50   20.20
 -25  -5   1   57.49   21.40
  25   5  -1   62.29   29.00
 -25   5   1   82.29   22.10
 -23  -5   1   10.90   17.30
  23   5  -1   28.90   24.20
 -23   5   1   17.90   19.20
  21  -5  -1    9.00   11.40
 -21  -5   1   23.50   15.50
  21   5  -1   20.90   21.60
 -21   5   1    9.00   15.10
 -19  -5   1  287.17   22.40
  19  -5  -1  241.98   18.30
  19   5  -1  272.17   32.60
 -19   5   1  216.98   21.70
  17  -5  -1  309.37   20.10
 -17  -5   1  306.67   23.00
 -17   5   1  289.37   22.20
  17   5  -1  310.67   23.60
  17   5  -1  345.27   33.70
  15  -5  -1   56.59   10.60
 -15  -5   1   62.09   11.70
  15   5  -1   36.80   11.40
  15   5  -1   51.99   18.60
 -15   5   1   24.80   11.30
 -13  -5   1   34.50    9.30
  13  -5  -1   34.40    9.00
 -13  -5   1   34.30    6.80
  13   5  -1   32.10   10.00
  13   5  -1   26.80   15.60
 -13   5   1   44.80   10.50
  11  -5  -1   57.39    5.60
  11  -5  -1   53.39    8.70
 -11  -5   1   51.99    8.80
 -11  -5   1   46.40    6.80
  11  -5  -1   56.69    9.40
 -11   5   1   58.79   10.00
  11   5  -1   47.40   14.40
 -11   5   1   54.29    5.40
  11   5  -1   49.60    9.80
   9  -5  -1  587.94   22.20
   9  -5  -1  514.05   21.50
  -9  -5   1  497.05   21.00
  -9  -5   1  528.25   19.00
   9  -5  -1  505.25   15.70
  -9   5   1  541.25   16.30
   9   5  -1  578.94   29.70
  -9   5   1  584.14   21.90
   9   5  -1  528.25   21.40
   7  -5  -1  892.81   28.40
  -7  -5   1  883.81   28.10
  -7  -5   1  865.01   27.00
   7  -5  -1  884.61   29.30
  -7   5   1  847.22   27.70
   7   5  -1  899.31   35.50
   7   5  -1  871.81   28.50
  -7   5   1  857.01   23.70
   5  -5  -1  923.81   29.40
   5  -5  -1 1005.90   31.30
  -5  -5   1  950.30   29.10
   5  -5  -1  953.20   27.10
  -5  -5   1  967.90   29.40
  -5   5   1  894.21   28.50
  -5   5   1  964.90   26.50
   5   5  -1  940.61   29.30
   5   5  -1 1002.20   35.70
  -3  -5   1  731.43   23.90
   3  -5  -1  723.13   22.10
   3  -5  -1  783.02   26.40
  -3  -5   1  741.93   25.00
   3  -5  -1  749.53   24.80
   3   5  -1  778.52   28.50
   3   5  -1  730.43   24.30
  -3   5   1  732.63   23.30
  -3   5   1  761.32   23.70
  -1  -5   1  744.13   23.30
  -1  -5   1  732.53   25.00
   1  -5  -1  698.93   25.40
   1  -5  -1  746.93   22.10
  -1   5   1  762.52   23.90
   1   5  -1  751.92   26.60
  -1   5   1  717.23   24.90
   1   5  -1  746.73   23.40
   1  -5   1  502.15   17.80
   1  -5   1  496.75   20.00
  -1  -5  -1  522.25   17.60
  -1  -5  -1  525.95   20.40
   1   5   1  540.05   22.10
   1   5   1  533.15   19.40
  -1   5  -1  539.95   19.80
  -1   5  -1  515.25   19.50
  -1   5  -1  547.25   18.40
   3  -5   1   45.80    7.80
   3  -5   1   45.10    6.40
  -3  -5  -1   54.69    7.50
  -3  -5  -1   37.80    5.90
   3  -5   1   42.40    6.10
  -3   5  -1   70.89    8.20
   3   5   1   44.50    7.40
   3   5   1   38.10    9.30
  -3   5  -1   46.70    5.90
  -5  -5  -1   21.20    5.60
  -5  -5  -1    8.50    5.10
   5  -5   1    3.60    4.80
   5  -5   1    8.40    5.10
   5  -5   1   15.70    6.20
  -5   5  -1   16.90    6.40
   5   5   1    4.10    8.60
   5   5   1   13.30    5.90
  -5   5  -1   18.40    3.30
  -7  -5  -1 1928.21   51.79
   7  -5   1 1936.41   51.89
  -7  -5  -1 1962.20   51.29
   7  -5   1 1926.81   53.09
   7  -5   1 1950.30   51.39
   7   5   1 2097.89   62.39
   7   5   1 1921.71   53.39
  -7   5  -1 1947.41   53.59
   9  -5   1  471.65   20.10
   9  -5   1  499.15   20.80
  -9  -5  -1  511.45   18.80
  -9  -5  -1  477.55   20.00
  -9   5  -1  514.95   22.30
   9   5   1  495.45   21.40
   9   5   1  549.65   29.40
 -11  -5  -1  215.08   12.90
  11  -5   1  211.18   15.60
 -11  -5  -1  218.58   15.40
  11   5   1  220.88   16.50
 -11   5  -1  198.58   16.10
  11   5   1  212.48   23.20
 -13  -5  -1  130.79   13.30
 -13  -5  -1  112.99   10.60
  13  -5   1  122.69   12.50
 -13   5  -1  131.39   14.90
  13   5   1  106.29   13.10
  13   5   1  131.99   21.30
  15  -5   1  470.65   23.50
 -15  -5  -1  509.25   26.10
 -15  -5  -1  434.16   19.90
  15   5   1  513.85   37.10
 -15   5  -1  451.15   26.70
  17  -5   1  654.43   28.60
 -17  -5  -1  680.83   31.30
  17   5   1  745.63   45.50
 -17   5  -1  608.34   33.20
  19  -5   1  466.55   25.60
 -19  -5  -1  425.26   28.70
 -19   5  -1  407.36   29.60
  19   5   1  483.65   41.60
  21  -5   1  187.38   18.40
 -21  -5  -1  245.88   23.60
  21   5   1  178.48   33.10
 -21   5  -1  211.18   24.70
 -23  -5  -1   -0.90   17.20
  23   5   1   15.50   26.00
 -23   5  -1    1.00   19.00
 -24  -6   1   94.79   22.20
 -24   6   1    0.80   20.40
  24   6  -1   30.00   26.70
  22  -6  -1   31.20   13.90
 -22  -6   1   53.59   18.70
 -22   6   1   23.30   18.00
  22   6  -1   35.20   24.90
 -20  -6   1   -6.70   14.20
  20  -6  -1    0.70   11.80
 -20   6   1  -10.00   15.10
  20   6  -1  -25.90   19.40
 -18  -6   1    1.80   13.00
  18  -6  -1   19.20   11.80
 -18   6   1    6.00   14.10
  18   6  -1   24.20   20.40
 -16  -6   1   12.20   11.50
  16  -6  -1  -13.80    9.40
  16   6  -1    1.50   18.10
 -16   6   1   -4.40   11.80
  16   6  -1  -19.50   10.70
  14  -6  -1    8.90    9.40
 -14  -6   1   11.50    9.90
 -14   6   1   14.50   10.50
  14   6  -1   -8.00   14.50
  14   6  -1   -2.70    9.50
  12  -6  -1   -4.70    8.00
 -12  -6   1   -7.00    7.90
 -12  -6   1   -2.00    6.00
  12   6  -1    7.90    8.70
  12   6  -1   13.70   14.10
 -12   6   1    0.50    8.50
  10  -6  -1   59.39    7.70
 -10  -6   1   51.19    8.20
  10  -6  -1   44.30    9.90
  10  -6  -1   48.70    9.80
 -10  -6   1   40.60    9.40
  10   6  -1   43.10   13.00
  10   6  -1   50.99    9.70
 -10   6   1   53.79    5.70
 -10   6   1   73.59   10.60
  -8  -6   1  190.58   13.00
  -8  -6   1  163.18   12.80
   8  -6  -1  171.68   13.60
   8  -6  -1  209.18   15.70
  -8   6   1  192.18    9.50
   8   6  -1  181.58   19.00
   8   6  -1  195.18   14.50
  -8   6   1  204.18   14.40
  -6  -6   1 1357.56   40.40
   6  -6  -1 1383.06   42.40
  -6  -6   1 1396.26   40.80
   6  -6  -1 1363.96   38.30
   6  -6  -1 1387.26   41.20
  -6   6   1 1360.36   36.70
   6   6  -1 1427.46   47.60
   6   6  -1 1392.26   41.10
  -6   6   1 1432.66   40.60
   4  -6  -1 1191.08   36.40
   4  -6  -1 1192.98   33.40
  -4  -6   1 1162.18   35.60
   4  -6  -1 1205.18   38.40
  -4  -6   1 1134.19   36.30
   4   6  -1 1238.48   41.10
   4   6  -1 1216.18   36.20
  -4   6   1 1192.68   35.20
  -4   6   1 1159.88   33.70
  -2  -6   1  546.15   22.50
   2  -6  -1  564.14   19.30
  -2  -6   1  581.44   21.20
   2  -6  -1  558.14   23.40
  -2   6   1  544.15   21.60
  -2   6   1  560.64   21.20
   2   6  -1  562.54   21.30
  -2   6   1  561.54   20.90
   2   6  -1  569.74   25.00
   0  -6   1   -2.60    5.70
   0  -6  -1    6.90    5.00
   0  -6  -1    8.30    6.70
   0  -6   1    8.80    5.60
   0   6  -1    4.80    5.30
   0   6  -1   -3.00    6.80
   0   6   1    1.90    5.10
   0   6   1   -0.70    6.70
   2  -6   1   66.89    7.80
  -2  -6  -1   88.29   10.30
  -2  -6  -1   62.19    7.70
   2  -6   1   51.79    8.80
   2   6   1   60.69    8.30
   2   6   1   56.89   10.80
  -2   6  -1   64.59    8.30
  -2   6  -1   54.19    7.90
  -2   6  -1   69.39    9.00
  -4  -6  -1   29.60    7.20
  -4  -6  -1   17.90    6.00
   4  -6   1   14.80    6.50
   4  -6   1   11.90    5.90
   4  -6   1    9.90    6.60
   4   6   1    3.30    6.90
   4   6   1   16.50    9.80
  -4   6  -1   10.10    6.70
  -4   6  -1   23.30    5.10
   6  -6   1   -9.50    5.90
   6  -6   1    7.80    6.00
  -6  -6  -1    1.40    6.00
  -6  -6  -1    9.10    6.20
   6  -6   1    4.70    5.90
  -6   6  -1    9.60    7.20
   6   6   1   10.30   10.10
   6   6   1   -1.50    7.00
   8  -6   1  216.78   15.50
  -8  -6  -1  197.18   14.80
  -8  -6  -1  191.18   13.90
   8   6   1  250.97   22.50
   8   6   1  209.68   15.80
  -8   6  -1  207.98   15.60
 -10  -6  -1   21.10    7.70
 -10  -6  -1   40.10    8.90
  10  -6   1   29.10    9.00
  10   6   1   19.90    9.10
 -10   6  -1   23.90    9.80
  10   6   1   35.50   14.50
  12  -6   1   17.80    9.30
 -12  -6  -1   10.50    7.50
 -12  -6  -1    4.40    8.70
  12   6   1    4.70    9.50
 -12   6  -1   12.90   10.20
  12   6   1   14.70   14.10
  14  -6   1  148.89   15.80
 -14  -6  -1  168.38   13.60
 -14  -6  -1  190.48   16.60
  14   6   1  130.99   16.00
 -14   6  -1  174.08   18.40
  14   6   1  156.08   24.30
  16  -6   1  111.69   15.20
 -16  -6  -1  146.49   17.10
 -16   6  -1   79.39   16.60
  16   6   1  142.09   26.50
 -18  -6  -1  101.09   17.80
  18  -6   1  102.29   15.90
 -18   6  -1  122.09   19.80
  18   6   1  121.79   25.80
 -20  -6  -1  169.58   21.30
  20  -6   1  107.39   16.60
  20   6   1   93.29   28.60
 -20   6  -1  104.99   21.70
  22  -6   1   20.50   15.30
 -22  -6  -1   24.80   18.40
  22   6   1   18.10   25.90
 -22   6  -1   29.80   20.30
 -24  -6  -1  -19.50   19.00
  24   6   1    7.60   26.50
 -24   6  -1  -20.60   20.40
 -23  -7   1   21.10   19.20
  23  -7  -1   21.20   17.50
  23   7  -1   -1.40   25.40
 -23   7   1   15.10   19.90
 -21  -7   1   11.00   16.80
  21  -7  -1   29.60   15.00
  21   7  -1   20.80   24.40
 -21   7   1   -4.90   17.60
  19  -7  -1    9.50   13.20
 -19  -7   1   21.20   15.60
 -19   7   1   42.30   16.70
  19   7  -1   34.10   23.00
  17  -7  -1   -3.30   11.90
 -17  -7   1  -20.60   12.10
 -17   7   1    7.70   14.50
  17   7  -1   -0.10   13.20
  17   7  -1  -11.40   17.40
  15  -7  -1   35.70   12.40
 -15  -7   1   59.09   14.00
  15   7  -1   43.60   19.20
  15   7  -1   50.09   13.40
 -15   7   1   57.69   14.50
 -13  -7   1   21.80   11.00
  13  -7  -1   15.60   10.80
 -13   7   1   15.10   11.40
  13   7  -1   12.40   11.80
  13   7  -1    1.30   15.30
  11  -7  -1    8.20    9.60
 -11  -7   1    5.20    7.30
 -11  -7   1    8.10   10.10
  11   7  -1    7.80   10.40
 -11   7   1   19.90   10.60
  11   7  -1    2.10   13.70
  -9  -7   1   12.10    7.60
   9  -7  -1   17.80    9.40
  -9  -7   1   20.60    9.20
   9   7  -1   11.30   12.70
  -9   7   1   15.80    9.10
   9   7  -1   17.10    9.20
   7  -7  -1   11.90    6.90
   7  -7  -1    6.30    9.70
   7  -7  -1    7.50    8.30
  -7  -7   1    0.50    6.50
  -7  -7   1    9.50    7.90
   7   7  -1   -4.10   10.80
  -7   7   1   13.10    8.00
  -7   7   1    4.90    5.10
   7   7  -1   -6.30    7.40
  -5  -7   1   44.80    9.00
   5  -7  -1   26.10    8.50
   5  -7  -1   40.80    7.70
  -5  -7   1   44.90    9.30
   5  -7  -1   37.00    9.60
  -5   7   1   43.80    7.50
  -5   7   1   34.00    8.30
   5   7  -1   41.90   12.40
   5   7  -1   35.50    8.70
   3  -7  -1   -7.00    6.80
  -3  -7   1   -1.50    6.40
  -3  -7   1   13.10    7.20
   3  -7  -1   -2.00    5.60
  -3   7   1    9.70    6.70
   3   7  -1    8.60    7.60
  -3   7   1    9.10    6.50
  -3   7   1    1.20    6.60
   3   7  -1    4.80    9.20
  -1  -7   1   53.79    9.80
   1  -7  -1   32.00    9.10
   1  -7  -1   50.39    7.70
  -1  -7   1   47.10    8.30
   1   7  -1   41.00    8.20
  -1   7   1   46.70    8.60
  -1   7   1   65.79    9.80
   1   7  -1   44.40   10.50
  -1   7   1   49.99   10.00
   1  -7   1   75.59   10.90
   1  -7   1   63.49    8.90
  -1  -7  -1   41.10    9.60
  -1  -7  -1   51.09    8.10
   1   7   1   49.30    8.80
  -1   7  -1   68.99    9.90
  -1   7  -1   58.19    9.30
  -1   7  -1   61.29   10.00
   1   7   1   60.09   11.50
   3  -7   1   76.99    9.50
  -3  -7  -1   81.59   10.90
   3  -7   1   87.29   11.80
  -3  -7  -1   80.69    9.60
   3   7   1   73.19   13.30
  -3   7  -1   68.39   10.40
   3   7   1   90.69   11.20
  -3   7  -1   67.09    8.80
  -3   7  -1   71.79    9.10
  -5  -7  -1  340.77   17.70
  -5  -7  -1  379.06   19.30
   5  -7   1  340.67   17.30
   5  -7   1  332.07   19.20
   5   7   1  374.36   24.70
  -5   7  -1  335.67   13.80
   5   7   1  346.67   19.50
  -5   7  -1  304.97   19.00
  -7  -7  -1   -0.60    6.80
  -7  -7  -1   17.70    8.00
   7  -7   1    1.30    7.90
   7  -7   1    4.00    7.10
   7   7   1   21.20    9.20
  -7   7  -1    4.90    9.00
   7   7   1   10.00   12.00
  -9  -7  -1   40.10    9.60
  -9  -7  -1   38.90    9.90
   9  -7   1   52.69   11.00
  -9   7  -1   39.70   11.10
   9   7   1   54.19   15.50
   9   7   1   40.50   11.30
  11  -7   1    5.30    9.50
 -11  -7  -1   22.40    9.00
 -11  -7  -1    9.30    9.80
 -11   7  -1   24.80   11.80
  11   7   1   36.90   16.20
  11   7   1   18.40   11.20
  13  -7   1   76.99   13.50
 -13  -7  -1   50.09   10.90
 -13  -7  -1   75.69   13.50
 -13   7  -1   57.99   14.70
  13   7   1   42.80   18.70
  13   7   1   47.10   13.10
  15  -7   1   12.20   12.30
 -15  -7  -1   14.90   12.30
 -15   7  -1   43.60   15.20
  15   7   1   45.30   21.10
 -17  -7  -1    8.30   13.50
  17  -7   1    9.10   13.20
 -17   7  -1   13.10   15.10
  17   7   1    7.20   19.30
  19  -7   1    2.90   14.20
 -19  -7  -1   -6.30   15.80
  19   7   1   30.20   23.10
 -19   7  -1   -9.60   17.30
 -21  -7  -1   -5.30   16.70
  21  -7   1   22.40   16.30
  21   7   1   51.79   26.10
 -21   7  -1   13.50   19.70
  23  -7   1  -12.50   15.60
 -23  -7  -1   22.60   19.50
 -23   7  -1   15.60   20.70
  23   7   1  -22.60   24.30
  22  -8  -1   26.60   16.70
 -22  -8   1   31.30   20.30
  22   8  -1   17.20   26.60
 -22   8   1   -3.60   19.00
 -20  -8   1  105.89   21.00
  20  -8  -1  132.19   19.50
 -20   8   1  102.19   21.80
  20   8  -1   39.90   24.70
 -18  -8   1  286.97   24.60
  18  -8  -1  212.18   21.90
 -18   8   1  249.88   25.30
  18   8  -1  208.18   30.70
 -16  -8   1  255.07   23.00
  16  -8  -1  274.07   22.80
 -16   8   1  234.08   23.00
  16   8  -1  289.47   23.70
  16   8  -1  224.28   30.10
  14  -8  -1  276.07   22.30
 -14  -8   1  293.77   21.90
 -14   8   1  280.27   23.20
  14   8  -1  302.37   23.30
  14   8  -1  256.37   29.00
 -12  -8   1   52.19   12.80
  12  -8  -1   46.90   12.70
 -12  -8   1   63.19   11.90
  12   8  -1   57.69   18.20
  12   8  -1   63.49   13.80
 -12   8   1   41.60   13.60
 -10  -8   1   -9.00    7.50
 -10  -8   1   -9.10    9.60
  10  -8  -1   -0.10   10.40
  10   8  -1   22.80   12.00
 -10   8   1   16.60   10.70
  10   8  -1    9.10   14.40
  -8  -8   1  338.77   19.80
   8  -8  -1  268.87   20.50
   8  -8  -1  276.57   17.70
  -8  -8   1  293.67   19.60
   8   8  -1  286.47   20.80
   8   8  -1  245.58   24.00
  -8   8   1  251.27   18.60
   6  -8  -1  219.78   18.30
   6  -8  -1  182.08   13.60
  -6  -8   1  196.38   15.50
  -6  -8   1  244.48   17.40
  -6   8   1  176.98   12.90
   6   8  -1  206.48   17.00
  -6   8   1  180.88   15.60
   6   8  -1  201.38   21.10
  -4  -8   1  307.97   18.70
   4  -8  -1  337.87   21.30
  -4  -8   1  305.57   19.30
   4  -8  -1  337.47   17.20
  -4   8   1  266.97   17.90
   4   8  -1  297.47   23.40
   4   8  -1  315.67   19.50
  -4   8   1  281.67   18.50
  -4   8   1  292.87   17.00
  -2  -8   1  104.99   12.90
  -2  -8   1   97.99   11.30
   2  -8  -1  106.99   11.00
   2  -8  -1  111.19   13.70
  -2   8   1  102.49   12.50
  -2   8   1   84.09   11.70
   2   8  -1  101.29   12.30
   2   8  -1   92.49   14.90
  -2   8   1   92.19   11.80
   0  -8   1   21.40    8.30
   0  -8  -1   30.60    9.60
   0  -8   1   13.00    8.90
   0  -8  -1   12.40    7.80
   0   8   1   20.80   10.50
   0   8  -1   10.00    8.00
   0   8  -1   15.30    9.80
   0   8   1    9.40    8.00
   0   8  -1    6.80    9.10
  -2  -8  -1   25.10    9.20
   2  -8   1   18.60    9.40
  -2  -8  -1   22.40    8.00
   2  -8   1    7.00    7.90
  -2   8  -1   28.30    9.10
   2   8   1   25.40   10.80
  -2   8  -1   17.50    8.30
   2   8   1   20.30    9.10
  -2   8  -1   29.80    9.90
   4  -8   1  617.44   27.50
  -4  -8  -1  652.43   27.50
   4  -8   1  614.34   24.80
  -4  -8  -1  610.04   25.00
  -4   8  -1  605.14   22.50
  -4   8  -1  616.54   25.30
  -4   8  -1  565.44   26.70
   4   8   1  610.84   26.80
   4   8   1  657.83   32.20
   6  -8   1  738.93   30.40
   6  -8   1  671.23   26.80
  -6  -8  -1  673.13   27.50
  -6  -8  -1  723.73   28.90
  -6   8  -1  733.23   30.20
   6   8   1  699.03   29.70
   6   8   1  724.83   35.40
   8  -8   1  433.56   21.70
   8  -8   1  415.96   24.40
  -8  -8  -1  434.56   23.20
  -8  -8  -1  414.16   22.80
   8   8   1  422.36   30.30
  -8   8  -1  393.76   24.30
   8   8   1  438.56   24.80
  10  -8   1   48.20   12.60
 -10  -8  -1   65.79   12.80
 -10  -8  -1   48.00   11.30
  10   8   1   68.29   13.60
 -10   8  -1   32.20   12.90
  10   8   1   74.49   18.30
 -12  -8  -1   20.00   10.20
  12  -8   1   10.10   11.40
 -12  -8  -1   11.60   12.10
  12   8   1    4.50   12.20
  12   8   1   13.80   16.40
 -12   8  -1   22.00   13.80
 -14  -8  -1   -8.90   12.70
  14  -8   1  -14.40   11.60
 -14   8  -1    3.20   14.40
  14   8   1    9.70   17.20
  16  -8   1   55.19   15.50
 -16  -8  -1   65.49   16.70
 -16   8  -1   41.80   18.20
  16   8   1   62.69   22.30
  18  -8   1   35.40   16.00
 -18  -8  -1   32.70   17.10
 -18   8  -1    2.80   17.90
  18   8   1   90.29   26.30
  20  -8   1   86.09   18.90
 -20  -8  -1   79.79   20.30
  20   8   1  114.69   29.20
 -20   8  -1   86.59   23.00
  22  -8   1   18.10   17.80
 -22  -8  -1  -19.50   17.50
 -22   8  -1   21.80   21.70
  22   8   1    6.40   25.70
  21  -9  -1   21.20   17.10
 -21  -9   1   39.40   21.00
  21   9  -1    4.10   25.70
 -21   9   1   64.89   22.40
  19  -9  -1   64.59   18.80
 -19  -9   1   96.79   20.50
 -19   9   1   65.99   21.30
  19   9  -1   53.19   26.70
 -17  -9   1  103.59   19.50
  17  -9  -1  107.19   18.50
  17   9  -1  106.89   26.10
 -17   9   1  103.59   20.40
 -15  -9   1   75.99   17.00
  15  -9  -1   96.09   17.10
 -15   9   1   98.69   19.10
  15   9  -1   96.49   18.60
  15   9  -1   82.79   23.30
 -13  -9   1    7.00   12.80
  13  -9  -1   28.90   13.70
  13   9  -1   34.80   19.20
 -13   9   1   26.90   14.10
  13   9  -1    6.70   13.60
 -11  -9   1   11.90    9.60
  11  -9  -1   -8.40   11.40
 -11  -9   1   17.80   12.20
 -11   9   1  -14.60   11.60
  11   9  -1   12.50   13.20
  11   9  -1    8.90   16.00
  -9  -9   1   25.80   11.70
   9  -9  -1   16.00   10.50
  -9  -9   1   30.40   10.60
   9  -9  -1   26.90   12.30
   9   9  -1  -19.70   14.40
  -9   9   1   31.30   12.10
   9   9  -1   33.70   12.50
   7  -9  -1   -0.50    8.60
   7  -9  -1    3.30   11.00
  -7  -9   1    2.90   10.30
  -7  -9   1    2.60    8.80
   7   9  -1  -11.30    9.80
   7   9  -1   29.30   15.60
  -7   9   1    8.90   10.60
   5  -9  -1   11.90    9.00
  -5  -9   1    0.60    9.80
   5  -9  -1    9.10   10.70
  -5  -9   1   19.20    9.90
  -5   9   1   13.80   10.00
   5   9  -1   18.80   10.00
  -5   9   1    3.90    8.10
   5   9  -1    9.70   12.90
  -5   9   1    1.60    9.40
   3  -9  -1   85.59   11.40
  -3  -9   1   86.69   12.80
  -3  -9   1  101.09   14.30
   3  -9  -1  105.89   15.30
  -3   9   1   75.79   12.10
  -3   9   1  101.99   13.70
  -3   9   1   97.79   13.50
   3   9  -1   89.89   13.50
   3   9  -1  121.69   17.50
  -1  -9   1   14.40   10.00
  -1  -9   1   13.00    9.30
   1  -9  -1   18.20   10.30
   1  -9  -1    8.30    8.50
  -1   9   1   11.60    9.90
   1   9  -1    7.30   10.30
  -1   9   1   18.30   11.10
  -1   9   1    5.10    9.20
   1   9  -1   -7.20    8.90
   1   9  -1   34.80   12.60
   1  -9   1   28.70   11.00
  -1  -9  -1   36.90   10.20
   1  -9   1   20.10    9.30
  -1  -9  -1   55.99   12.10
  -1   9  -1   45.60   11.30
   1   9   1   28.20   12.70
  -1   9  -1   49.30   12.00
  -1   9  -1   25.50   11.30
   1   9   1   41.00   12.00
  -3  -9  -1   40.00   11.40
   3  -9   1   61.29   13.00
  -3  -9  -1   72.99   11.50
   3  -9   1   54.59   11.00
  -3   9  -1   43.20   10.20
   3   9   1   53.09   12.20
   3   9   1   54.79   14.60
  -3   9  -1   36.20   11.90
  -3   9  -1   59.19   12.20
  -5  -9  -1  128.59   15.40
   5  -9   1  117.09   15.60
  -5  -9  -1  110.49   13.40
   5  -9   1   84.39   12.30
  -5   9  -1  119.69   15.00
   5   9   1  141.29   20.10
  -5   9  -1   96.49   14.90
   5   9   1  108.79   14.70
  -7  -9  -1  177.98   17.10
   7  -9   1  167.68   18.50
  -7  -9  -1  192.78   17.30
   7  -9   1  156.28   14.90
   7   9   1  171.78   22.00
  -7   9  -1  183.48   18.60
   7   9   1  183.68   18.80
  -9  -9  -1  330.47   22.40
   9  -9   1  243.08   18.60
  -9  -9  -1  283.77   20.50
   9  -9   1  254.47   21.50
  -9   9  -1  285.87   22.80
   9   9   1  299.47   28.50
   9   9   1  240.78   21.60
 -11  -9  -1   47.00   13.60
  11  -9   1   45.60   14.10
 -11  -9  -1   43.50   12.00
 -11   9  -1   36.40   15.40
  11   9   1   62.99   19.50
  11   9   1   31.00   13.80
 -13  -9  -1   16.50   13.90
  13  -9   1   32.40   14.10
  13   9   1   41.40   19.80
 -13   9  -1   16.80   14.80
  15  -9   1   53.89   16.20
 -15  -9  -1   36.20   15.80
 -15   9  -1   14.70   16.50
  15   9   1   33.80   21.60
 -17  -9  -1  210.18   23.60
  17  -9   1  217.48   23.40
 -17   9  -1  163.08   24.30
  17   9   1  101.39   26.30
 -19  -9  -1   78.09   21.20
  19  -9   1   47.90   17.90
  19   9   1   64.09   25.80
 -19   9  -1   81.19   24.00
 -20 -10   1   -6.80   19.30
  20 -10  -1   26.60   18.70
  20  10  -1   17.30   25.20
 -20  10   1   37.40   22.20
  18 -10  -1   -6.00   16.00
 -18 -10   1   14.20   18.70
 -18  10   1   -1.50   18.20
  18  10  -1   26.90   24.30
  16 -10  -1   34.00   17.20
 -16 -10   1   31.10   16.80
  16  10  -1    2.10   21.10
 -16  10   1  -26.90   16.30
 -14 -10   1   61.49   17.60
  14 -10  -1   55.99   16.50
  14  10  -1   48.40   17.70
  14  10  -1   26.70   21.00
 -14  10   1   55.69   17.90
 -12 -10   1    3.20   13.80
  12 -10  -1  -18.90   12.40
 -12  10   1   16.70   14.90
  12  10  -1    7.70   14.30
  12  10  -1   16.40   18.20
 -10 -10   1  -12.50   12.20
 -10 -10   1   -5.10    9.90
  10 -10  -1   14.20   13.20
 -10  10   1   12.00   12.70
  10  10  -1    0.90   14.20
  10  10  -1   27.70   17.50
  -8 -10   1   22.80   11.20
  -8 -10   1    1.10   12.00
   8 -10  -1   -8.30   10.20
   8 -10  -1   11.90   12.50
   8  10  -1   13.60   16.20
   8  10  -1    4.90   12.90
  -8  10   1   20.10   12.70
   6 -10  -1   17.60   10.30
   6 -10  -1    8.80   11.80
  -6 -10   1    3.20   11.90
  -6 -10   1   13.40   10.90
  -6  10   1    8.70   12.00
   6  10  -1   33.40   15.60
  -6  10   1   38.40   13.40
   6  10  -1    9.10   11.80
   4 -10  -1    9.80   12.20
  -4 -10   1   30.20   11.80
   4 -10  -1   41.70   11.20
  -4 -10   1   29.40   12.50
   4  10  -1   29.40   15.30
  -4  10   1   17.80   12.70
   4  10  -1   13.30   12.40
  -4  10   1   15.60   10.70
  -4  10   1    8.90   10.50
  -2 -10   1   12.30   11.60
   2 -10  -1   -0.70   11.60
  -2 -10   1    6.20   10.70
   2  10  -1    2.20   12.80
   2  10  -1    3.10   11.20
  -2  10   1   17.00   11.10
  -2  10   1   -0.10   10.30
  -2  10   1    4.60   11.20
   0 -10   1   17.80   11.80
   0 -10  -1   13.80   11.30
   0 -10  -1   23.80   10.70
   0 -10   1    0.70   10.70
   0  10  -1    0.60   11.80
   0  10  -1    7.90   11.50
   0  10   1   18.30   12.40
   0  10   1   28.00   12.00
   0  10   1    3.30   12.30
   0  10  -1   11.10   12.00
   2 -10   1   23.40   12.10
   2 -10   1    6.90   10.10
  -2 -10  -1   16.90   11.00
  -2 -10  -1  -17.30   10.20
  -2  10  -1   12.90   12.10
  -2  10  -1   12.50   14.10
   2  10   1   21.30   12.50
   2  10   1    9.10   12.90
  -2  10  -1    8.90   11.40
  -4 -10  -1   -9.00   10.60
  -4 -10  -1    2.80   11.00
   4 -10   1  -10.60    9.90
   4 -10   1    5.10   11.80
   4  10   1   31.40   12.90
  -4  10  -1    1.10   11.50
   4  10   1  -16.80   12.60
  -4  10  -1    1.60   12.00
  -6 -10  -1   -0.40   11.10
   6 -10   1    0.80   11.60
  -6 -10  -1   -7.40   10.80
   6 -10   1   16.40   11.00
   6  10   1   10.40   15.10
  -6  10  -1   -7.80   12.00
   6  10   1    8.70   12.70
  -6  10  -1  -18.10   10.60
   8 -10   1   18.70   12.00
  -8 -10  -1   26.50   12.40
  -8 -10  -1   21.90   13.10
   8 -10   1   -5.00   11.90
  -8  10  -1   31.20   14.90
   8  10   1   27.20   14.60
   8  10   1   23.80   16.60
 -10 -10  -1   34.70   13.50
  10 -10   1   59.19   15.70
 -10 -10  -1   49.99   13.20
  10  10   1   53.99   15.80
  10  10   1   33.40   18.20
 -10  10  -1   29.90   14.90
  12 -10   1   11.60   13.90
 -12 -10  -1    4.90   13.40
 -12  10  -1  -36.30   14.80
  12  10   1   31.00   18.40
  14 -10   1   31.20   16.10
 -14 -10  -1   39.80   16.50
  14  10   1   -4.70   19.40
 -14  10  -1   -1.80   16.40
 -16 -10  -1   28.50   17.70
  16 -10   1    6.10   15.90
  16  10   1   23.00   22.10
 -16  10  -1   -6.80   18.80
 -18 -10  -1  -19.10   18.10
  18 -10   1    5.30   17.20
 -18  10  -1   14.70   21.20
  18  10   1   -4.40   22.50
 -17 -11   1    2.40   19.50
  17 -11  -1   44.50   18.70
  17  11  -1   17.40   23.70
 -17  11   1    2.50   18.90
 -15 -11   1   99.59   20.70
  15 -11  -1  125.09   20.70
  15  11  -1  138.49   27.60
 -15  11   1   87.79   20.90
  13 -11  -1   43.40   17.20
 -13 -11   1  -12.30   15.70
 -13  11   1   21.50   17.20
  13  11  -1   17.20   16.80
  13  11  -1    7.80   19.40
 -11 -11   1   12.70   15.00
  11 -11  -1   -6.70   14.10
  11  11  -1   16.70   19.90
  11  11  -1   25.70   16.50
 -11  11   1    5.10   14.70
   9 -11  -1   -9.40   12.40
  -9 -11   1   13.20   14.30
  -9 -11   1   25.80   12.30
   9 -11  -1   14.50   13.90
   9  11  -1   35.20   15.80
  -9  11   1   44.70   15.40
  -9  11   1   15.30   14.60
   9  11  -1   23.50   18.70
   7 -11  -1  115.19   15.10
  -7 -11   1  160.78   19.10
  -7 -11   1  180.88   18.90
   7 -11  -1  167.78   20.30
   7  11  -1  141.59   19.30
  -7  11   1  161.88   20.10
  -7  11   1  139.49   18.80
   7  11  -1  165.98   23.30
   5 -11  -1  238.48   22.40
  -5 -11   1  257.97   21.30
  -5 -11   1  248.38   21.20
   5 -11  -1  240.88   18.80
  -5  11   1  235.38   22.30
   5  11  -1  266.27   26.30
   5  11  -1  229.98   21.80
  -5  11   1  227.08   20.90
   3 -11  -1   13.90   13.00
   3 -11  -1    8.10   11.00
  -3 -11   1    7.30   12.30
  -3 -11   1   33.80   12.60
  -3  11   1    4.80   13.80
   3  11  -1    2.30   14.40
   3  11  -1    6.00   13.20
  -3  11   1   17.50   12.60
  -1 -11   1  112.79   17.00
  -1 -11   1  128.89   16.00
   1 -11  -1  135.29   15.50
   1 -11  -1  116.29   17.80
   1  11  -1  117.79   18.50
   1  11  -1  107.29   18.40
  -1  11   1   98.79   16.80
  -1  11   1  117.89   17.60
  -1  11   1  105.19   17.30
   1  11  -1  120.29   18.40
  -1 -11  -1   95.09   16.50
   1 -11   1   96.79   16.60
   1 -11   1  111.89   15.30
  -1 -11  -1  115.79   15.40
  -1  11  -1  135.29   19.20
   1  11   1  110.19   17.30
   1  11   1   97.99   17.00
   1  11   1   86.89   18.20
  -1  11  -1  109.79   17.60
   3 -11   1   69.69   14.00
  -3 -11  -1  110.29   16.80
  -3 -11  -1   87.39   14.80
   3 -11   1   96.09   17.10
  -3  11  -1   86.59   16.60
  -3  11  -1   90.69   16.70
   3  11   1   82.29   18.80
   3  11   1  112.99   17.40
  -5 -11  -1  110.79   16.00
   5 -11   1   83.09   14.50
  -5 -11  -1  126.39   17.70
   5 -11   1   93.59   16.80
   5  11   1   63.59   16.30
  -5  11  -1   85.49   17.20
  -5  11  -1  116.69   18.70
   5  11   1  105.39   20.50
  -7 -11  -1   77.79   15.70
   7 -11   1   75.49   14.30
  -7 -11  -1   62.39   15.40
   7 -11   1   72.99   16.20
  -7  11  -1   87.79   17.30
   7  11   1   67.99   20.40
   7  11   1   83.59   17.70
  -7  11  -1   74.29   17.50
  -9 -11  -1   46.10   15.70
   9 -11   1   29.80   15.20
  -9 -11  -1   51.09   14.70
   9 -11   1   49.30   14.00
   9  11   1   44.30   19.70
  -9  11  -1   27.30   16.00
 -11 -11  -1   22.00   15.70
  11 -11   1  -14.00   13.80
  11  11   1  -12.20   18.70
 -11  11  -1   12.40   15.90
 -13 -11  -1   -1.00   15.80
  13 -11   1    7.40   15.40
  13  11   1    4.90   19.10
 -13  11  -1    7.60   18.20
 -15 -11  -1    9.60   17.60
  15 -11   1   24.20   17.10
  15  11   1   -5.60   19.90
 -15  11  -1   18.20   19.70
 -17 -11  -1  -14.60   18.70
  17 -11   1   17.20   18.50
  17  11   1    5.50   22.80
 -17  11  -1  -50.29   19.40
 -16 -12   1   35.50   20.60
  16 -12  -1   55.79   19.60
  16  12  -1  -13.30   21.70
 -14 -12   1   48.90   20.50
  14 -12  -1   71.09   20.60
  14  12  -1   63.59   25.00
  12 -12  -1   22.50   17.10
 -12 -12   1   -9.00   16.10
  12  12  -1    5.60   19.90
  12  12  -1   -0.80   21.10
 -12  12   1   27.00   23.20
  10 -12  -1   41.10   17.10
 -10 -12   1    8.40   15.90
  10  12  -1   31.90   20.70
  10  12  -1   17.10   17.10
 -10  12   1    0.40   16.40
 -10  12   1   -0.40   15.50
  -8 -12   1   77.99   16.30
   8 -12  -1   24.40   14.00
   8 -12  -1   76.29   17.80
  -8 -12   1   67.59   17.20
   8  12  -1   69.69   18.40
  -8  12   1   95.39   18.80
  -8  12   1   71.89   17.90
   8  12  -1   31.40   19.10
  -6 -12   1  120.89   18.80
   6 -12  -1  121.49   19.70
   6 -12  -1  118.59   16.10
  -6 -12   1  137.29   18.40
  -6  12   1   98.29   19.20
  -6  12   1  114.49   18.80
   6  12  -1  125.69   21.90
   6  12  -1  119.39   19.90
  -4 -12   1   48.60   15.20
   4 -12  -1   68.79   16.90
   4 -12  -1   38.70   13.50
  -4  12   1   29.90   15.60
   4  12  -1   44.90   17.50
  -4  12   1   51.99   17.90
   4  12  -1   61.89   16.80
   2 -12  -1   14.90   12.60
   2 -12  -1   35.10   15.20
  -2 -12   1    0.20   12.70
  -2 -12   1   20.50   13.90
  -2  12   1   20.50   16.00
   2  12  -1   -6.60   14.30
  -2  12   1  -12.30   13.00
   2  12  -1    8.80   15.10
   2  12  -1  -10.20   14.80
   0 -12   1   17.40   13.90
   0 -12  -1   -0.20   12.40
   0 -12  -1   14.80   14.20
   0 -12   1   -4.20   12.50
   0  12   1   -1.80   13.70
   0  12  -1   28.20   16.10
   0  12   1   -2.00   13.50
   0  12  -1    9.80   15.80
   0  12   1  -11.00   14.80
  -2 -12  -1    7.20   12.90
   2 -12   1   10.80   13.60
   2 -12   1    9.10   12.90
  -2 -12  -1   25.00   14.60
  -2  12  -1   14.80   15.40
   2  12   1   34.70   16.90
   2  12   1    1.30   14.60
  -2  12  -1   27.30   16.70
   2  12   1   22.40   14.30
  -4 -12  -1   92.19   15.90
  -4 -12  -1  120.09   18.20
   4 -12   1   90.29   17.10
   4 -12   1   94.09   16.30
  -4  12  -1  103.69   19.00
   4  12   1   92.39   20.70
  -4  12  -1   56.69   16.50
   4  12   1   73.99   18.80
  -6 -12  -1   61.29   15.90
   6 -12   1   26.10   15.30
  -6 -12  -1   67.39   16.10
   6 -12   1   10.00   13.30
  -6  12  -1   35.70   16.60
  -6  12  -1   30.40   17.70
   6  12   1   42.70   20.90
   6  12   1   35.30   18.20
   8 -12   1   87.29   18.80
   8 -12   1   63.69   16.00
  -8 -12  -1   73.49   17.20
  -8 -12  -1   95.09   18.00
  -8  12  -1  109.99   20.90
   8  12   1  112.69   23.10
  -8  12  -1  119.79   21.00
  10 -12   1   70.59   19.30
 -10 -12  -1   78.29   18.20
  10  12   1   56.79   21.30
 -10  12  -1   48.80   18.40
 -10  12  -1   55.19   19.80
 -12 -12  -1    6.90   17.50
  12 -12   1   14.40   16.50
 -12  12  -1    0.80   19.30
  12  12   1   10.00   21.80
 -14 -12  -1  -26.30   17.00
  14 -12   1   10.70   18.30
  14  12   1    7.90   21.80
 -14  12  -1    3.30   19.90
 -13 -13   1   67.99   20.20
  13 -13  -1   53.09   20.90
  13  13  -1   47.20   24.70
 -11 -13   1   19.20   18.60
  11 -13  -1    9.90   17.60
  11  13  -1    2.20   20.40
   9 -13  -1   38.80   17.70
  -9 -13   1   -9.60   16.70
  -9  13   1   10.80   25.30
   9  13  -1    6.60   19.20
   9  13  -1   10.10   17.40
  -7 -13   1   40.70   15.00
   7 -13  -1   14.60   15.80
  -7 -13   1    5.00   16.20
   7  13  -1   22.40   17.40
   7  13  -1   -8.60   18.00
  -7  13   1   10.00   18.60
  -5 -13   1    4.50   14.40
   5 -13  -1   14.70   16.20
  -5 -13   1   32.70   16.60
   5  13  -1   21.60   18.60
  -5  13   1   -6.90   16.30
   5  13  -1  -24.50   16.70
  -3 -13   1   31.50   15.30
   3 -13  -1   23.70   15.70
  -3 -13   1   24.10   14.90
   3  13  -1   43.40   17.70
  -3  13   1   21.10   17.90
   3  13  -1    5.30   17.00
   1 -13  -1   25.40   15.60
  -1 -13   1    0.50   13.40
  -1 -13   1   15.40   14.80
   1  13  -1   12.70   17.40
   1  13  -1   36.10   19.30
  -1  13   1   -1.50   16.20
   1 -13   1   89.39   18.50
  -1 -13  -1   98.09   19.10
   1 -13   1  126.19   18.30
   1  13   1  123.39   21.40
  -1  13  -1  105.29   21.00
  -1  13  -1  104.09   21.10
   3 -13   1   27.50   14.70
   3 -13   1   48.20   15.40
  -3 -13  -1   51.99   16.90
  -3  13  -1   28.50   19.10
  -3  13  -1   36.00   17.90
   3  13   1   27.40   17.70
   5 -13   1   12.90   14.50
  -5 -13  -1   46.90   16.20
   5 -13   1   50.89   16.90
   5  13   1   57.99   21.50
  -5  13  -1   50.19   19.40
  -5  13  -1   40.00   18.50
   7 -13   1   12.30   15.30
   7 -13   1   10.80   16.50
  -7 -13  -1   21.60   15.20
  -7  13  -1   -3.50   18.10
   7  13   1    6.20   18.60
  -7  13  -1  -20.60   17.50
   9 -13   1   -3.20   15.70
   9 -13   1   18.30   17.90
  -9  13  -1   31.00   19.70
  -9  13  -1   18.00   18.80
   9  13   1   17.20   20.70
  11 -13   1   34.20   18.90
  11  13   1   19.90   21.40
 -11  13  -1    9.20   19.80
 -11  13  -1    2.80   19.50
  -8 -14   1   56.99   19.80
   8 -14  -1   61.29   20.30
   8  14  -1   53.69   37.10
   8  14  -1   58.59   22.50
   6 -14  -1   51.49   18.30
  -6 -14   1   88.09   18.00
  -6 -14   1   48.30   19.30
   6  14  -1   55.09   22.00
   6  14  -1   39.40   22.20
  -4 -14   1   21.10   15.60
   4 -14  -1   32.90   17.20
  -4 -14   1   21.40   16.60
   4  14  -1   12.20   19.50
   4  14  -1   27.10   19.40
   2 -14  -1   55.19   17.40
  -2 -14   1   30.00   16.50
  -2 -14   1   64.99   18.80
   2  14  -1    0.70   18.40
   2  14  -1   35.10   20.40
   0 -14   1   42.80   17.80
   0 -14  -1   46.00   17.60
   0 -14   1   13.20   15.30
   0  14  -1   40.70   20.90
   0  14  -1   42.40   20.30
   2 -14   1   15.50   15.70
  -2 -14  -1   35.90   17.50
   2 -14   1   34.70   16.20
  -2  14  -1   45.30   21.20
  -2  14  -1   55.09   20.50
  -4 -14  -1   16.30   16.30
   4 -14   1   14.30   16.20
   4 -14   1   17.90   15.50
  -4  14  -1   16.60   22.50
  -4  14  -1   40.60   20.90
   4  14   1   25.90   18.90
   6 -14   1    5.50   15.90
   6 -14   1   43.30   18.80
  -6 -14  -1   31.20   17.80
  -6  14  -1    6.30   19.90
   6  14   1    8.10   18.50
  -6  14  -1   -0.60   32.70
   8 -14   1   19.10   17.70
   8 -14   1  -20.90   17.20
  -8  14  -1   32.30   20.30
   8  14   1   -1.30   20.00
 -28   0   2   22.10   20.80
 -26   0   2   45.60   19.10
 -24   0   2  834.22   40.20
 -22   0   2  373.06   27.10
  22   0  -2  367.16   36.10
 -20   0   2 1104.19   40.30
  20   0  -2 1103.89   49.40
  18   0  -2  366.76   27.30
  18   0  -2  343.07   22.10
 -18   0   2  307.17   20.70
 -16   0   2  258.57   12.40
  16   0  -2  270.87   21.40
  16   0  -2  257.37   18.30
 -16   0   2  283.97   17.50
  16   0  -2  291.27   12.70
  14   0  -2   76.19   11.60
 -14   0   2   52.59    8.50
  14   0  -2   60.49    5.90
  14   0  -2   63.39    9.70
 -12   0   2  922.31   28.60
  12   0  -2  949.31   28.80
  12   0  -2  873.31   29.90
  12   0  -2  918.61   24.20
  10   0  -2 1059.89   30.90
  10   0  -2 1039.70   29.70
  10   0  -2 1026.20   26.00
 -10   0   2 1035.40   29.70
   8   0  -2 1227.78   33.00
  -8   0   2 1219.28   32.30
   8   0  -2 1201.78   32.20
   8   0  -2 1228.68   29.20
  -6   0   2   37.60    4.00
  -6   0   2   41.40    4.30
   6   0  -2   45.70    4.60
   6   0  -2   42.00    2.60
   6   0  -2   37.50    3.90
  -4   0   2 4064.59   93.09
  -4   0   2 4081.59   92.49
   4   0  -2 4006.60   92.69
   4   0  -2 3897.21   91.39
   4   0  -2 4062.59   92.39
  -2   0   2 1271.87   30.20
  -2   0   2 1286.77   30.70
   2   0  -2 1268.77   29.70
  -2   0   2 1298.47   29.80
   0   0  -2 4226.28   96.59
   0   0   2 4214.48   96.09
   0   0   2 4226.98   96.89
   0   0   2 4254.47   96.59
  -2   0  -2 2494.95   59.39
   2   0   2 2565.54   60.59
   2   0   2 2588.74   59.99
  -2   0  -2 2550.74   59.99
  -2   0  -2 2605.34   60.09
  -4   0  -2   80.99    5.10
  -4   0  -2   85.29    5.90
   4   0   2   91.89    7.30
  -4   0  -2   86.49    5.50
   4   0   2   74.79    5.10
   6   0   2  127.99    7.00
   6   0   2  143.79   11.30
  -6   0  -2  129.59    8.00
   6   0   2  137.59    7.70
  -6   0  -2  129.99    7.30
   8   0   2   90.69    6.80
   8   0   2  101.99   11.70
  -8   0  -2   97.69    7.40
   8   0   2   99.19    8.10
  -8   0  -2   91.09    7.80
  10   0   2    0.10    7.80
  10   0   2    6.70    5.20
 -10   0  -2   -5.20    5.00
  10   0   2    2.10    4.60
 -10   0  -2    5.60    4.40
  12   0   2   57.99    7.40
  12   0   2   54.59   12.80
 -12   0  -2   42.40    8.40
 -12   0  -2   65.09    7.70
  12   0   2   45.90    8.10
 -14   0  -2   73.09   11.00
  14   0   2   38.00   14.60
 -14   0  -2   62.79    8.40
  14   0   2   66.89    8.60
 -16   0  -2   64.29    9.60
 -16   0  -2   57.49   11.20
  16   0   2   68.89    9.50
  16   0   2  107.89   19.50
  18   0   2    6.60   19.90
 -18   0  -2   21.10   11.70
  18   0   2   24.40    8.70
 -18   0  -2   26.20    8.70
 -20   0  -2  127.79   17.80
 -22   0  -2  176.48   22.40
 -24   0  -2  318.07   29.00
 -27  -1   2   49.70   21.30
 -27   1   2   37.20   20.20
 -25  -1   2   60.19   19.30
 -25   1   2   60.49   18.20
 -23  -1   2  647.04   34.80
 -23   1   2  576.44   33.80
  23   1  -2  675.03   47.80
 -21  -1   2  253.37   20.60
 -21   1   2  214.88   19.90
  21   1  -2  212.28   28.60
  19  -1  -2  271.27   24.90
 -19  -1   2  297.37   21.70
  19   1  -2  313.67   21.60
  19   1  -2  312.37   29.80
 -19   1   2  336.07   22.30
 -17  -1   2  288.17   19.10
  17  -1  -2  284.07   13.90
  17  -1  -2  253.17   19.30
  17  -1  -2  303.27   23.00
  17   1  -2  293.17   20.00
  17   1  -2  294.57   25.00
 -17   1   2  305.07   19.30
  17   1  -2  258.97   16.90
 -15  -1   2   26.30    8.00
 -15  -1   2   22.40    4.70
  15  -1  -2   36.30    9.80
  15  -1  -2   20.40    8.50
  15  -1  -2   22.80    5.50
  15   1  -2   24.70    4.90
  15   1  -2   28.00   11.00
  15   1  -2   25.30    8.40
 -15   1   2   13.60    7.60
  13  -1  -2   16.80    6.90
 -13  -1   2   22.00    6.70
  13  -1  -2   24.50    7.70
 -13  -1   2   24.90    4.00
  13  -1  -2   15.80    4.50
  13   1  -2   20.30    6.80
 -13   1   2   12.00    6.30
  13   1  -2   18.30    4.00
  13   1  -2   20.50    9.10
  11  -1  -2   98.49    8.70
 -11  -1   2   85.39    8.20
 -11  -1   2  100.19    5.50
  11  -1  -2   94.69    6.50
  11  -1  -2  111.09    9.70
  11   1  -2   81.89    7.90
  11   1  -2   80.59    5.40
 -11   1   2   88.69    8.40
  11   1  -2   97.49   10.60
  -9  -1   2  208.08    6.60
  -9  -1   2  184.88   10.00
   9  -1  -2  227.98   10.20
   9  -1  -2  187.68    7.70
   9  -1  -2  197.18   10.40
  -9   1   2  197.18    9.90
   9   1  -2  193.18    6.60
  -9   1   2  179.48    9.30
   9   1  -2  188.98   10.00
   9   1  -2  169.58   11.30
   7  -1  -2  204.08    9.00
   7  -1  -2  181.18    8.10
  -7  -1   2  190.98    8.70
   7  -1  -2  182.18    7.30
  -7   1   2  178.38    8.00
  -7   1   2  194.98    8.80
   7   1  -2  195.28    8.80
   7   1  -2  195.88   10.40
   5  -1  -2   75.29    5.10
   5  -1  -2   73.09    4.80
   5  -1  -2   71.39    5.00
  -5  -1   2   70.49    5.10
   5   1  -2   67.29    4.80
  -5   1   2   73.39    4.80
   5   1  -2   77.29    6.00
  -5   1   2   72.69    4.50
  -3  -1   2  829.42   19.90
   3  -1  -2  849.81   22.20
  -3  -1   2  888.01   22.30
  -3  -1   2  848.92   22.10
   3  -1  -2  855.01   21.70
   3   1  -2  846.92   22.00
  -3   1   2  865.11   21.70
   3   1  -2  855.41   20.80
  -3   1   2  875.41   20.60
   1  -1  -2  475.45   12.60
  -1  -1   2  463.15   12.40
  -1  -1   2  481.65   13.00
  -1  -1   2  484.75   12.10
  -1   1   2  473.65   13.30
   1   1  -2  469.15   12.20
   1  -1   2 3511.95   79.99
   1  -1   2 3536.65   81.09
  -1  -1  -2 3501.05   80.99
   1  -1   2 3524.75   80.89
  -1  -1  -2 3496.45   80.19
  -1  -1  -2 3443.06   81.19
  -1   1  -2 3527.85   79.99
   1   1   2 3560.24   81.29
   1   1   2 3487.65   82.79
  -1   1  -2 3524.55   81.79
   3  -1   2 9552.34  217.98
  -3  -1  -2 9707.53  217.98
   3  -1   2 8206.78  218.48
  -3  -1  -2 9781.72  217.98
   3  -1   2 9563.54  216.98
   3   1   2 9947.10  218.38
   3   1   2 9788.02  218.18
  -3   1  -2 9999.00  219.18
   3   1   2 9635.74  221.58
  -3   1  -2 9741.73  217.58
   5  -1   2 4465.75  102.69
  -5  -1  -2 4410.36  103.09
  -5  -1  -2 4529.85  102.49
   5  -1   2 4180.68  102.79
  -5   1  -2 4429.76  102.59
   5   1   2 4278.07  108.19
   5   1   2 4419.26  102.49
  -5   1  -2 4457.85  103.99
   5   1   2 4511.15  103.19
   7  -1   2 1293.27   38.60
  -7  -1  -2 1434.56   37.30
   7  -1   2 1442.86   36.30
   7  -1   2 1453.35   36.90
  -7  -1  -2 1441.06   36.00
   7   1   2 1422.76   37.20
   7   1   2 1257.17   42.80
   7   1   2 1430.36   36.10
  -7   1  -2 1464.15   38.10
   9  -1   2   21.90    7.90
   9  -1   2   42.60    6.50
  -9  -1  -2   47.80    6.80
   9  -1   2   42.60    5.70
  -9  -1  -2   38.80    5.50
  -9   1  -2   40.80    6.80
   9   1   2   41.10    5.60
   9   1   2   31.80   10.20
   9   1   2   44.90    6.80
 -11  -1  -2   66.19    7.00
 -11  -1  -2   47.70    7.80
  11  -1   2   49.80    6.70
  11  -1   2   46.20   10.50
  11  -1   2   45.80    7.60
  11   1   2   40.50    6.30
 -11   1  -2   71.59    9.00
  11   1   2   54.69   13.00
  11   1   2   75.19    8.50
  13  -1   2   55.89    8.00
  13  -1   2   32.10   11.60
 -13  -1  -2   49.30    8.90
 -13  -1  -2   53.69    7.50
 -13   1  -2   59.19    9.60
  13   1   2   63.19   15.20
  13   1   2   72.39    8.10
  13   1   2   62.79    9.30
 -15  -1  -2   21.30    6.90
 -15  -1  -2   -2.50    8.10
  15  -1   2   34.80    8.20
  15  -1   2   29.30   13.00
 -15   1  -2   26.20    7.90
  15   1   2   26.30    7.50
 -15   1  -2   34.30   10.00
  15   1   2   13.00   13.70
  17  -1   2    6.60    8.00
 -17  -1  -2    3.30    7.20
 -17  -1  -2   23.60   10.70
 -17   1  -2    0.90   10.30
  17   1   2    0.30   14.70
 -17   1  -2    1.70    7.50
  17   1   2    7.80    7.60
 -19  -1  -2    0.10   11.80
  19  -1   2   -3.50    8.70
 -19   1  -2    0.20   12.20
  19   1   2   -0.90    8.60
  19   1   2  -15.30   15.40
 -19   1  -2    6.60    8.80
 -21  -1  -2  171.78   20.70
 -21   1  -2  244.38   23.20
 -23  -1  -2  303.07   26.80
 -23   1  -2  272.27   26.60
 -25  -1  -2  141.39   23.60
 -25   1  -2  126.89   23.80
 -26  -2   2   18.60   18.30
 -26   2   2    2.00   18.10
 -24  -2   2   37.30   16.70
  24   2  -2    5.60   23.60
 -24   2   2   70.39   18.20
 -22  -2   2   57.99   15.70
 -22   2   2   61.99   16.20
  22   2  -2   53.19   24.10
 -20  -2   2   14.60   11.90
 -20   2   2   12.90   11.60
  20   2  -2   21.00   19.40
  18  -2  -2  126.79   10.80
 -18  -2   2  112.69   14.20
  18  -2  -2   95.99   15.50
  18   2  -2  105.69   14.00
 -18   2   2  106.39   13.60
  18   2  -2  148.29   22.00
  16  -2  -2  141.59   13.70
  16  -2  -2  154.48   11.60
  16  -2  -2  151.98   15.40
 -16  -2   2  152.08   13.90
  16   2  -2  136.89   10.40
 -16   2   2  155.88   13.90
  16   2  -2  166.08   20.10
  16   2  -2  107.29   12.50
  14  -2  -2  185.48   13.90
  14  -2  -2  201.68   11.10
  14  -2  -2  194.18   14.30
 -14  -2   2  193.48   13.80
 -14  -2   2  172.28    8.40
 -14   2   2  168.88   13.10
  14   2  -2  176.18   17.90
  14   2  -2  212.38   14.90
  14   2  -2  186.08    9.30
 -12  -2   2   55.49    4.50
 -12  -2   2   57.49    7.70
  12  -2  -2   57.59    6.30
  12  -2  -2   59.19    7.50
  12  -2  -2   61.99    8.20
  12   2  -2   50.59   10.50
  12   2  -2   58.59    8.70
 -12   2   2   60.29    8.20
  10  -2  -2  274.17   13.50
 -10  -2   2  268.27    8.70
  10  -2  -2  275.07   11.10
 -10  -2   2  260.97   13.00
  10  -2  -2  287.77   11.90
 -10   2   2  267.27   11.60
  10   2  -2  296.87   13.40
  10   2  -2  300.87   16.50
 -10   2   2  270.97   13.00
   8  -2  -2  497.05   15.10
   8  -2  -2  496.25   17.10
  -8  -2   2  499.45   13.20
  -8  -2   2  485.05   16.70
   8  -2  -2  482.75   15.80
   8   2  -2  503.05   16.70
  -8   2   2  530.85   16.70
   8   2  -2  485.95   19.60
  -8   2   2  501.65   15.40
  -6  -2   2  702.73   19.50
  -6  -2   2  766.72   22.10
   6  -2  -2  768.12   22.00
   6  -2  -2  772.62   20.40
   6  -2  -2  760.32   22.10
  -6   2   2  786.42   21.30
   6   2  -2  795.52   21.40
   6   2  -2  781.22   24.20
  -6   2   2  814.82   20.80
  -4  -2   2 6256.97  144.89
   4  -2  -2 6182.18  145.49
  -4  -2   2 5847.42  142.89
   4  -2  -2 6371.46  144.59
   4   2  -2 6289.97  143.49
  -4   2   2 6408.76  143.69
  -4   2   2 6459.95  143.09
   4   2  -2 6316.47  145.49
  -2  -2   2   54.29    3.80
   2  -2  -2   56.29    3.00
   2  -2  -2   56.49    5.20
   2  -2  -2   65.79    5.20
  -2  -2   2   64.39    4.90
  -2   2   2   59.99    3.60
  -2   2   2   64.39    4.80
   2   2  -2   64.09    4.90
   2   2  -2   66.89    4.20
   0  -2  -2   76.89    3.70
   0  -2   2   76.69    4.40
   0  -2   2   70.49    4.90
   0  -2  -2   79.39    5.30
   0   2  -2   76.09    4.20
   0   2   2   78.69    6.20
   0   2  -2   73.59    4.20
   0   2   2   81.19    5.50
   0   2  -2   73.39    5.70
   2  -2   2 1080.69   27.10
  -2  -2  -2 1038.40   26.60
  -2  -2  -2  996.50   25.70
   2  -2   2 1059.49   26.70
  -2   2  -2 1014.30   27.90
   2   2   2 1027.30   27.40
  -2   2  -2 1049.70   25.90
   2   2   2 1051.69   30.40
   4  -2   2  793.92   21.10
  -4  -2  -2  766.02   20.70
  -4  -2  -2  768.12   20.70
  -4   2  -2  727.83   22.30
   4   2   2  756.62   21.60
   4   2   2  776.62   26.80
  -4   2  -2  723.73   20.40
   6  -2   2  109.99    7.20
  -6  -2  -2  107.69    6.70
  -6  -2  -2  106.09    7.40
   6   2   2  110.19   12.50
   6   2   2  102.79    7.60
  -6   2  -2  133.49    8.60
   6   2   2   96.09    7.10
  -6   2  -2  113.89    8.50
  -8  -2  -2  120.19    8.00
   8  -2   2  126.99    8.90
   8  -2   2  118.09    8.70
   8  -2   2  131.09    9.20
  -8  -2  -2  122.09    9.20
   8   2   2  132.09    8.50
  -8   2  -2  145.99   10.50
   8   2   2  136.99    9.50
   8   2   2  115.29   14.80
  10  -2   2 2231.78   60.09
 -10  -2  -2 2356.96   59.59
  10  -2   2 2328.97   58.99
  10  -2   2 2280.27   57.89
 -10  -2  -2 2279.37   56.99
  10   2   2 2336.77   59.89
  10   2   2 2289.67   69.79
  10   2   2 2264.37   57.49
 -10   2  -2 2267.47   60.49
 -12  -2  -2  354.26   18.10
  12  -2   2  372.16   19.80
  12  -2   2  355.46   16.10
  12  -2   2  327.57   19.00
 -12  -2  -2  366.46   15.00
  12   2   2  378.46   15.80
 -12   2  -2  366.86   19.10
  12   2   2  363.56   28.70
  12   2   2  357.76   18.00
 -14  -2  -2  333.07   15.50
  14  -2   2  353.06   22.70
 -14  -2  -2  330.97   19.10
  14  -2   2  362.56   17.30
  14   2   2  327.67   16.10
 -14   2  -2  337.37   20.40
  14   2   2  383.06   31.00
 -16  -2  -2  206.78   16.70
  16  -2   2  195.78   14.30
 -16  -2  -2  204.38   14.00
  16   2   2  191.98   13.60
 -16   2  -2  204.78   17.90
  16   2   2  174.48   25.00
 -18  -2  -2   36.10   12.00
  18  -2   2   30.80   10.00
 -18  -2  -2   21.00   10.70
 -18   2  -2    7.00   12.00
  18   2   2   13.20    8.30
 -18   2  -2   10.00    9.00
  18   2   2   -9.00   17.00
  20  -2   2   64.89   12.40
 -20  -2  -2   35.80   14.70
 -20   2  -2   61.09   16.40
 -20   2  -2   69.89   12.00
  20   2   2   32.50   20.90
 -22  -2  -2   35.10   17.60
 -22   2  -2   45.00   18.40
 -24  -2  -2   27.90   19.30
 -24   2  -2   12.60   19.10
 -27  -3   2    3.50   20.20
 -27   3   2    1.20   19.20
 -25  -3   2    3.80   18.40
  25   3  -2    5.50   23.80
 -25   3   2    0.40   17.00
 -23  -3   2   55.79   17.50
  23   3  -2   33.20   24.20
 -23   3   2   24.30   16.00
 -21  -3   2  153.28   18.70
  21   3  -2   96.59   25.20
 -21   3   2   90.39   16.20
 -19  -3   2   22.10   11.80
  19  -3  -2   45.90    9.50
 -19   3   2   29.00   12.60
  19   3  -2   56.69   20.50
  19   3  -2   27.00   12.70
  17  -3  -2  -10.80    6.90
 -17  -3   2   -3.10    8.90
  17   3  -2  -19.30   13.90
 -17   3   2    4.50    9.80
  17   3  -2   -2.00    9.30
 -15  -3   2   13.70    8.30
  15  -3  -2   14.10    8.60
  15  -3  -2    2.30    6.20
  15  -3  -2   20.60    7.90
 -15  -3   2   11.50    6.60
  15   3  -2   20.60   13.10
 -15   3   2   18.00    8.60
  15   3  -2   13.80    8.40
 -13  -3   2  392.06   13.10
  13  -3  -2  433.76   16.80
  13  -3  -2  447.26   20.10
 -13  -3   2  397.56   18.80
  13  -3  -2  406.76   16.60
  13   3  -2  416.06   25.10
  13   3  -2  367.36   18.80
 -13   3   2  405.66   19.00
  11  -3  -2  383.76   15.40
 -11  -3   2  366.76   12.10
  11  -3  -2  383.26   14.30
  11  -3  -2  379.56   17.40
 -11  -3   2  376.16   16.80
  11   3  -2  369.86   17.00
 -11   3   2  374.56   17.00
 -11   3   2  395.56   14.40
  11   3  -2  388.46   21.80
   9  -3  -2 3135.69   74.79
  -9  -3   2 3176.48   77.89
   9  -3  -2 3153.18   77.69
  -9  -3   2 3059.49   73.89
   9  -3  -2 3125.59   76.99
   9   3  -2 3231.48   82.59
  -9   3   2 3162.48   77.29
  -9   3   2 3157.28   75.19
   9   3  -2 3163.48   77.29
  -7  -3   2 2131.49   52.29
  -7  -3   2 2181.28   54.79
   7  -3  -2 2150.28   54.89
   7  -3  -2 2136.89   54.59
  -7   3   2 2166.88   52.29
   7   3  -2 2180.98   57.89
   7   3  -2 2175.98   54.09
  -7   3   2 2159.98   53.69
   5  -3  -2 2449.35   62.69
  -5  -3   2 2433.96   60.49
   5  -3  -2 2503.75   61.59
  -5  -3   2 2492.95   61.89
  -5   3   2 2570.84   60.29
   5   3  -2 2525.55   60.89
   5   3  -2 2475.05   63.79
  -5   3   2 2554.04   59.99
  -3  -3   2  480.75   15.60
  -3  -3   2  506.05   16.40
   3  -3  -2  494.05   13.90
   3  -3  -2  502.75   16.80
   3  -3  -2  493.85   17.70
  -3   3   2  490.65   14.70
   3   3  -2  515.65   15.60
   3   3  -2  528.45   18.00
  -3   3   2  506.05   15.70
   1  -3  -2 2373.26   60.59
  -1  -3   2 2451.85   59.19
   1  -3  -2 2445.76   57.29
  -1  -3   2 2433.86   59.59
  -1   3   2 2471.65   59.79
   1   3  -2 2410.66   58.39
  -1   3   2 2479.45   60.69
   1   3  -2 2497.95   59.69
  -1  -3  -2  540.65   15.30
   1  -3   2  552.34   16.70
   1  -3   2  512.75   16.50
  -1  -3  -2  538.75   17.10
   1   3   2  554.84   17.60
  -1   3  -2  545.35   16.00
  -1   3  -2  535.45   18.00
  -1   3  -2  512.45   15.80
   1   3   2  539.25   19.70
   3  -3   2  455.15   14.80
   3  -3   2  433.46   14.70
  -3  -3  -2  441.56   14.50
   3  -3   2  385.86   15.90
  -3  -3  -2  441.16   13.70
   3   3   2  446.26   19.50
  -3   3  -2  438.16   16.10
   3   3   2  468.75   15.80
  -3   3  -2  434.96   13.90
   5  -3   2   42.60    5.50
   5  -3   2   37.50    5.20
  -5  -3  -2   50.09    5.20
  -5  -3  -2   43.20    5.10
  -5   3  -2   34.90    6.00
   5   3   2   45.60    9.40
   5   3   2   35.50    5.40
  -5   3  -2   36.00    4.50
  -7  -3  -2    4.70    4.40
  -7  -3  -2    0.40    3.60
   7  -3   2   -7.30    3.90
   7  -3   2    1.50    3.80
   7   3   2   10.70    8.80
  -7   3  -2   -1.30    4.80
   7   3   2    2.30    4.50
  -9  -3  -2  517.95   17.40
   9  -3   2  527.85   18.80
  -9  -3  -2  497.75   19.00
   9  -3   2  513.75   19.20
   9   3   2  493.65   19.40
   9   3   2  520.35   28.50
  -9   3  -2  508.25   20.60
  11  -3   2  973.80   29.40
 -11  -3  -2  904.41   27.50
  11  -3   2  963.00   31.80
 -11  -3  -2  961.50   30.60
  11  -3   2  939.21   27.60
 -11   3  -2  911.51   31.70
  11   3   2  937.01   31.00
  11   3   2  967.50   41.30
  13  -3   2 1285.47   37.70
 -13  -3  -2 1243.18   39.60
 -13  -3  -2 1264.27   36.00
  13   3   2 1258.97   40.00
 -13   3  -2 1255.67   41.10
  13   3   2 1371.26   53.19
  13   3   2 1317.27   37.20
 -15  -3  -2  492.35   20.10
  15  -3   2  562.54   22.50
 -15  -3  -2  531.95   24.80
  15   3   2  517.35   21.40
 -15   3  -2  488.05   26.00
  15   3   2  576.74   37.20
 -17  -3  -2   30.90    8.80
 -17  -3  -2   58.99   12.60
  17  -3   2    9.20    9.00
 -17   3  -2   32.70   13.60
  17   3   2   40.80   19.50
  17   3   2   29.40    9.30
  19  -3   2   96.19   13.20
 -19  -3  -2   63.79   15.50
  19   3   2  130.59   26.10
 -19   3  -2   71.79   16.20
  21  -3   2  -19.40   10.10
 -21  -3  -2  -10.40   14.70
  21   3   2   20.20   21.80
 -21   3  -2   -5.80   15.60
 -23  -3  -2   -1.40   17.20
 -23   3  -2   33.40   19.50
 -25  -3  -2    3.00   19.90
 -25   3  -2    2.90   20.40
 -26  -4   2  -14.80   18.60
  26   4  -2  -14.10   25.50
 -26   4   2  -16.20   17.70
 -24  -4   2   12.60   17.70
  24   4  -2   12.20   25.90
 -24   4   2  -20.20   16.50
 -22  -4   2  120.59   19.00
 -22   4   2  129.19   19.30
  22   4  -2  160.08   29.80
  20  -4  -2  179.88   15.10
 -20  -4   2  177.58   18.60
  20   4  -2  180.18   28.50
 -20   4   2  181.78   19.30
 -18  -4   2   12.00   10.90
  18  -4  -2   20.40    9.00
  18   4  -2   50.29   20.50
 -18   4   2    7.80   11.30
  18   4  -2    7.00   10.80
 -16  -4   2   14.80    9.60
  16  -4  -2   46.50    9.50
  16   4  -2   33.00   16.60
 -16   4   2   37.00   11.20
  16   4  -2   34.30   10.20
 -14  -4   2  695.93   27.00
  14  -4  -2  708.23   27.40
  14  -4  -2  670.33   23.20
  14  -4  -2  738.43   25.20
 -14  -4   2  675.03   21.00
  14   4  -2  754.22   37.00
  14   4  -2  706.73   27.60
 -14   4   2  651.83   27.10
  12  -4  -2  179.58   13.20
 -12  -4   2  187.58    9.70
 -12  -4   2  194.28   14.10
  12  -4  -2  162.88   10.30
  12  -4  -2  164.68   12.70
  12   4  -2  185.78   19.10
  12   4  -2  209.88   14.60
 -12   4   2  198.58   10.30
 -12   4   2  166.88   13.10
 -10  -4   2 1012.30   27.70
  10  -4  -2 1026.50   30.90
  10  -4  -2 1036.30   31.50
  10  -4  -2  991.30   27.20
 -10  -4   2  960.60   31.10
  10   4  -2 1006.50   30.90
 -10   4   2 1007.10   30.70
 -10   4   2 1005.40   27.50
  10   4  -2 1000.10   37.40
   8  -4  -2  418.36   17.00
   8  -4  -2  418.96   17.40
  -8  -4   2  422.96   17.30
  -8  -4   2  381.36   14.70
   8   4  -2  433.76   16.90
  -8   4   2  401.66   13.70
  -8   4   2  432.66   16.30
   8   4  -2  430.86   21.80
   6  -4  -2 1020.70   30.90
  -6  -4   2  919.51   28.00
  -6  -4   2 1005.50   29.60
   6  -4  -2  990.30   29.50
   6   4  -2 1017.30   33.30
  -6   4   2 1014.90   28.10
  -6   4   2 1006.10   26.90
   6   4  -2  990.80   28.90
  -4  -4   2   32.60    5.60
   4  -4  -2   29.30    5.70
   4  -4  -2   27.70    6.30
  -4  -4   2   30.10    5.50
   4  -4  -2   29.60    4.00
   4   4  -2   29.30    5.40
  -4   4   2   39.60    5.20
  -4   4   2   30.60    4.80
   4   4  -2   38.40    7.60
  -2  -4   2  789.22   24.00
   2  -4  -2  786.92   21.20
  -2  -4   2  774.32   23.60
   2  -4  -2  736.23   25.00
   2   4  -2  780.52   22.90
  -2   4   2  778.32   24.00
   2   4  -2  830.32   25.80
  -2   4   2  785.42   23.60
  -2   4   2  769.92   22.10
   0  -4   2 1250.77   33.80
   0  -4  -2 1247.98   35.30
   0  -4   2 1218.08   34.20
   0  -4  -2 1259.37   32.00
   0   4  -2 1276.57   35.30
   0   4   2 1205.08   36.30
   0   4  -2 1293.17   33.10
   0   4  -2 1257.47   35.30
   0   4  -2 1262.67   33.70
   0   4   2 1236.48   34.40
  -2  -4  -2 1332.07   33.90
  -2  -4  -2 1336.37   35.90
   2  -4   2 1305.87   35.10
   2  -4   2 1325.47   35.80
  -2   4  -2 1297.17   34.60
   2   4   2 1301.97   39.90
  -2   4  -2 1256.97   33.80
   2   4   2 1268.67   36.20
  -2   4  -2 1306.27   36.70
  -4  -4  -2  826.22   24.90
   4  -4   2  830.12   25.20
  -4  -4  -2  833.82   24.30
   4  -4   2  873.81   25.90
  -4   4  -2  850.21   24.70
  -4   4  -2  875.61   27.20
   4   4   2  843.52   31.70
   4   4   2  879.61   26.60
   6  -4   2    1.30    2.30
  -6  -4  -2    9.30    4.60
  -6  -4  -2   12.40    4.70
   6  -4   2    4.40    4.80
   6  -4   2    2.70    4.80
   6   4   2   10.70    5.30
  -6   4  -2    9.30    4.30
   6   4   2   11.00    9.10
  -6   4  -2   13.00    5.90
  -8  -4  -2  112.59    8.70
   8  -4   2  102.59    9.00
   8  -4   2   99.09    9.40
  -8  -4  -2  111.69    9.30
   8   4   2  101.39    9.70
   8   4   2  113.19   16.40
  -8   4  -2   94.59   10.40
 -10  -4  -2  770.92   26.00
 -10  -4  -2  754.52   23.80
  10  -4   2  747.13   25.50
 -10   4  -2  719.13   27.50
  10   4   2  721.33   26.60
  10   4   2  813.42   37.50
 -12  -4  -2  567.94   20.80
  12  -4   2  583.94   22.90
 -12  -4  -2  615.14   24.10
  12   4   2  635.54   36.70
  12   4   2  569.94   24.60
 -12   4  -2  566.24   25.90
 -14  -4  -2  196.28   15.80
  14  -4   2  156.98   13.50
 -14  -4  -2  158.48   11.90
  14   4   2  207.78   26.00
 -14   4  -2  181.08   17.30
 -16  -4  -2   18.90   10.80
 -16  -4  -2   35.60    8.90
  16  -4   2   22.80    9.90
  16   4   2   35.40   19.10
 -16   4  -2   14.60   12.70
  18  -4   2   29.70   11.30
 -18  -4  -2   27.70   13.10
 -18   4  -2   26.60   14.90
  18   4   2   24.80   20.60
  20  -4   2   42.50   12.80
 -20  -4  -2   36.60   15.00
 -20   4  -2   72.99   19.00
  20   4   2   29.00   22.50
  22  -4   2   21.10   12.60
 -22  -4  -2   14.00   16.90
  22   4   2   22.00   24.20
 -22   4  -2   23.00   19.00
 -24  -4  -2   24.70   19.60
  24   4   2   52.49   31.50
 -24   4  -2   56.39   22.00
 -25  -5   2   15.30   19.60
  25   5  -2   33.60   27.10
 -25   5   2    0.30   19.30
 -23  -5   2    9.40   16.80
 -23   5   2   -8.10   16.30
  23   5  -2   -1.60   22.70
 -21  -5   2   11.20   14.20
  21  -5  -2   -8.20   10.70
  21   5  -2   -8.80   21.30
 -21   5   2  -18.00   13.80
 -19  -5   2   -6.30   12.00
  19  -5  -2   -0.80    9.90
  19   5  -2   -4.80   11.90
  19   5  -2   -9.50   19.10
 -19   5   2    7.90   12.90
  17  -5  -2   -8.10    8.80
 -17  -5   2   16.30   11.20
  17   5  -2    7.60   11.40
 -17   5   2   -6.50   11.20
  17   5  -2   39.80   19.50
  15  -5  -2   75.39   11.10
 -15  -5   2   83.99   12.00
  15   5  -2   86.29   13.00
  15   5  -2   79.39   19.50
 -15   5   2   64.39   12.60
 -13  -5   2   -3.00    5.00
  13  -5  -2    0.90    6.20
 -13  -5   2    3.60    7.70
  13  -5  -2   -9.50    7.00
  13  -5  -2    7.30    7.90
 -13   5   2   -5.70    4.00
  13   5  -2   -9.50    7.80
 -13   5   2   10.80    8.50
  13   5  -2    9.30   13.30
  11  -5  -2   42.40    8.30
  11  -5  -2   37.20    5.70
 -11  -5   2   43.30    6.50
 -11  -5   2   42.60    8.50
  11  -5  -2   42.90    9.00
  11   5  -2   37.50   13.40
 -11   5   2   34.00    8.20
  11   5  -2   40.70    8.70
 -11   5   2   45.40    5.70
   9  -5  -2  170.78   13.40
  -9  -5   2  147.89   10.30
   9  -5  -2  172.18   12.80
  -9  -5   2  177.48   13.20
  -9   5   2  166.08    8.90
   9   5  -2  189.58   18.70
   9   5  -2  173.08   13.10
  -9   5   2  180.98   12.60
  -7  -5   2  116.89    9.70
  -7  -5   2  109.49   10.20
   7  -5  -2  135.59   11.30
   7  -5  -2  133.79   12.20
  -7   5   2  138.59   10.20
  -7   5   2  114.69    8.00
   7   5  -2  140.39   15.40
   7   5  -2  131.19   10.80
   5  -5  -2  329.67   12.90
   5  -5  -2  342.37   16.30
  -5  -5   2  318.27   15.40
  -5  -5   2  341.17   15.40
   5  -5  -2  307.47   16.50
   5   5  -2  354.86   15.40
  -5   5   2  329.57   13.50
  -5   5   2  326.47   14.30
   5   5  -2  324.77   19.60
   3  -5  -2   17.80    6.60
   3  -5  -2    8.70    4.00
   3  -5  -2    0.90    5.50
  -3  -5   2    4.20    5.10
  -3  -5   2    3.90    5.30
  -3   5   2    9.20    4.70
   3   5  -2   11.80    5.20
  -3   5   2    9.10    5.30
   3   5  -2   14.60    7.90
   1  -5  -2  107.79   10.20
   1  -5  -2  102.59    7.30
  -1  -5   2  117.09    9.10
  -1  -5   2  124.09   10.30
  -1   5   2  122.59   10.10
   1   5  -2  112.59    8.80
   1   5  -2  130.69   11.80
   1   5  -2  122.09    9.10
  -1   5   2   93.89    9.80
   1  -5   2   13.10    5.10
  -1  -5  -2   18.00    6.00
   1  -5   2   19.20    6.00
  -1  -5  -2   12.10    4.50
  -1   5  -2    9.40    4.60
  -1   5  -2    7.50    4.20
  -1   5  -2   -2.10    5.50
   1   5   2    4.50    6.40
  -1   5  -2    4.30    5.60
   1   5   2    2.80    4.80
   3  -5   2    9.20    5.00
  -3  -5  -2   20.10    5.70
   3  -5   2    3.60    5.10
  -3  -5  -2    0.00    4.20
   3  -5   2   -1.30    2.90
  -3   5  -2    2.80    5.40
   3   5   2   -0.30    4.90
  -3   5  -2   -2.00    4.10
  -3   5  -2    2.10    4.30
   3   5   2    3.60    7.30
   5  -5   2  196.48   11.90
   5  -5   2  178.88   12.20
  -5  -5  -2  160.48   11.40
  -5  -5  -2  192.28   11.20
   5   5   2  184.08   12.80
  -5   5  -2  167.78   12.80
  -5   5  -2  170.18   10.40
   5   5   2  176.58   17.50
  -7  -5  -2   52.19    7.40
   7  -5   2   49.70    7.90
   7  -5   2   31.70    6.70
   7  -5   2   42.10    7.30
  -7  -5  -2   43.40    7.30
  -7   5  -2   51.99    9.10
   7   5   2   43.90   12.50
   7   5   2   48.80    8.20
   9  -5   2   12.10    6.90
  -9  -5  -2   18.60    6.40
  -9  -5  -2   15.70    7.00
   9   5   2   15.40    7.70
  -9   5  -2   12.90    8.20
   9   5   2   20.30   11.60
 -11  -5  -2   92.59   10.90
  11  -5   2   73.19   10.40
 -11  -5  -2   71.39    8.90
  11   5   2  106.39   18.70
 -11   5  -2   79.89   12.20
  11   5   2   69.99   11.20
 -13  -5  -2   35.00    7.90
 -13  -5  -2   42.50   10.60
  13  -5   2   32.30   10.00
  13   5   2   87.19   20.20
 -13   5  -2   34.30   11.70
  13   5   2   45.20   16.90
 -15  -5  -2   68.59   10.20
  15  -5   2   88.39   12.60
 -15  -5  -2   76.49   13.40
  15   5   2  118.29   23.40
 -15   5  -2  103.19   16.10
  17  -5   2   17.30   11.20
 -17  -5  -2   -4.10   11.40
  17   5   2   15.50   19.80
 -17   5  -2   12.80   14.90
 -19  -5  -2   -5.50   13.40
  19  -5   2  -13.20   11.20
  19   5   2   24.20   21.10
 -19   5  -2  -12.90   15.10
  21  -5   2   26.70   13.50
 -21  -5  -2   35.50   17.20
  21   5   2   60.39   26.30
 -21   5  -2   54.79   20.20
 -23  -5  -2  -18.70   16.90
  23  -5   2    0.80   17.40
  23   5   2    8.40   25.80
 -23   5  -2  -23.40   19.30
 -24  -6   2   36.30   20.00
  24   6  -2   10.20   25.90
 -24   6   2   34.30   19.90
  22  -6  -2    6.20   13.20
 -22  -6   2   14.40   16.80
 -22   6   2   26.00   17.50
  22   6  -2  -20.20   21.60
  20  -6  -2    8.60   11.60
 -20  -6   2   -2.00   14.50
 -20   6   2  -23.90   14.10
  20   6  -2   -4.50   21.00
  18  -6  -2   -7.60   10.50
 -18  -6   2  -21.20   11.40
 -18   6   2  -19.80   11.80
  18   6  -2   12.20   19.30
  18   6  -2  -12.30   11.80
  16  -6  -2   36.50   10.90
 -16  -6   2   32.80   12.10
 -16   6   2    5.50   12.10
  16   6  -2    9.40   11.20
  16   6  -2   19.30   18.80
 -14  -6   2  121.89   14.50
  14  -6  -2   96.69   12.50
  14   6  -2   93.69   20.30
  14   6  -2  118.49   14.30
 -14   6   2  136.49   15.30
 -12  -6   2  218.88   13.80
  12  -6  -2  220.38   16.90
 -12  -6   2  226.48   16.40
 -12   6   2  236.48   17.00
  12   6  -2  217.48   17.10
  12   6  -2  238.28   25.00
 -10  -6   2  520.25   19.70
  10  -6  -2  537.05   23.20
 -10  -6   2  460.85   21.80
  10  -6  -2  468.05   22.30
 -10   6   2  477.55   16.60
  10   6  -2  484.25   30.50
 -10   6   2  473.15   21.40
  10   6  -2  442.46   21.60
   8  -6  -2  789.92   28.70
   8  -6  -2  701.03   27.00
  -8  -6   2  773.82   27.30
  -8  -6   2  771.32   26.10
  -8   6   2  750.32   26.10
   8   6  -2  713.33   34.30
   8   6  -2  738.33   27.20
  -8   6   2  755.62   22.90
   6  -6  -2  707.23   23.20
   6  -6  -2  763.32   27.50
  -6  -6   2  752.82   26.30
   6  -6  -2  755.42   28.70
  -6  -6   2  715.93   26.30
   6   6  -2  749.53   26.30
  -6   6   2  764.82   23.70
   6   6  -2  747.13   32.70
  -6   6   2  763.12   25.30
   4  -6  -2  447.66   21.20
   4  -6  -2  456.15   20.10
  -4  -6   2  441.96   19.60
   4  -6  -2  437.36   16.20
  -4  -6   2  415.66   19.00
   4   6  -2  433.36   23.80
   4   6  -2  462.85   19.20
  -4   6   2  419.16   17.60
  -4   6   2  431.66   17.50
   2  -6  -2   56.89    6.60
  -2  -6   2   49.00    7.70
   2  -6  -2   46.70    9.20
  -2  -6   2   38.50    8.00
   2   6  -2   38.50   10.00
  -2   6   2   63.99    8.30
   2   6  -2   55.99    8.10
  -2   6   2   52.49    9.00
  -2   6   2   56.89    7.60
   0  -6   2   84.79    9.90
   0  -6  -2   64.19    9.50
   0  -6  -2   62.59    7.10
   0  -6   2   66.39    8.10
   0   6   2   73.99    9.30
   0   6  -2   72.49   10.30
   0   6  -2   87.19    9.40
   0   6  -2   68.79    8.10
   0   6  -2   58.79    9.20
   0   6   2   68.99   10.90
   2  -6   2  509.15   19.70
   2  -6   2  506.25   21.20
  -2  -6  -2  511.35   18.50
  -2  -6  -2  551.94   21.70
   2   6   2  505.15   24.40
  -2   6  -2  482.85   19.00
  -2   6  -2  487.25   19.40
  -2   6  -2  462.75   21.30
   2   6   2  489.25   20.80
  -4  -6  -2   31.80    7.50
   4  -6   2   22.80    7.60
  -4  -6  -2   17.60    6.10
   4  -6   2   27.40    7.00
   4   6   2   15.40    7.00
  -4   6  -2   32.30    5.30
  -4   6  -2   26.90    6.40
  -4   6  -2   33.00    7.80
   4   6   2   23.80   10.20
  -6  -6  -2  214.58   13.80
  -6  -6  -2  217.58   14.20
   6  -6   2  195.58   14.70
   6   6   2  211.68   20.00
  -6   6  -2  210.48   15.60
   6   6   2  220.68   15.60
  -8  -6  -2   63.69    9.10
   8  -6   2   40.10    9.10
  -8  -6  -2   40.20    8.60
   8   6   2   70.19   10.50
  -8   6  -2   67.89   11.10
   8   6   2   67.59   14.70
 -10  -6  -2  266.57   16.10
  10  -6   2  220.28   16.60
 -10  -6  -2  236.08   16.20
 -10   6  -2  229.38   18.20
  10   6   2  244.08   17.50
  10   6   2  259.67   25.50
  12  -6   2  534.95   25.30
 -12  -6  -2  575.54   23.20
 -12  -6  -2  579.94   26.00
 -12   6  -2  575.14   28.20
  12   6   2  550.24   26.80
  12   6   2  628.04   37.80
 -14  -6  -2  506.55   23.20
 -14  -6  -2  519.55   26.50
  14  -6   2  531.35   26.70
 -14   6  -2  506.65   30.50
  14   6   2  651.73   41.10
  16  -6   2  225.68   19.90
 -16  -6  -2  273.27   21.40
 -16   6  -2  256.17   23.80
  16   6   2  268.27   31.60
 -18  -6  -2   17.10   14.20
  18  -6   2   24.40   13.60
  18   6   2   63.19   23.80
 -18   6  -2   19.30   16.60
  20  -6   2    6.30   13.90
 -20  -6  -2    2.10   15.70
 -20   6  -2  -11.90   17.20
  20   6   2  -10.70   22.80
 -22  -6  -2   24.90   17.90
  22  -6   2   35.60   15.80
 -22   6  -2   49.80   21.80
  22   6   2   25.40   26.00
 -23  -7   2   57.09   20.80
 -23   7   2   13.30   19.60
  23   7  -2   92.29   29.50
 -21  -7   2   31.20   17.90
  21  -7  -2   10.20   13.90
  21   7  -2   73.49   25.50
 -21   7   2   43.40   18.60
  19  -7  -2    9.20   12.80
 -19  -7   2   22.40   15.50
  19   7  -2  -31.00   18.50
 -19   7   2   21.50   15.80
  17  -7  -2   -9.20   11.00
 -17  -7   2    1.90   13.20
  17   7  -2   -1.70   17.00
  17   7  -2    5.20   13.50
 -17   7   2    1.20   13.50
 -15  -7   2  125.29   16.30
  15  -7  -2   92.69   14.60
  15   7  -2  141.59   17.50
 -15   7   2  109.39   15.90
  15   7  -2  123.69   23.10
  13  -7  -2  605.34   28.20
 -13  -7   2  613.04   28.20
  13   7  -2  617.74   38.00
 -13   7   2  542.95   27.80
  13   7  -2  569.54   28.40
  11  -7  -2  856.31   33.10
 -11  -7   2  873.81   29.70
 -11  -7   2  860.11   32.30
  11   7  -2  839.82   32.90
  11   7  -2  869.21   41.50
 -11   7   2  839.92   32.10
  -9  -7   2  923.01   31.00
  -9  -7   2  893.21   32.30
   9  -7  -2  902.41   34.00
  -9   7   2  880.81   26.80
  -9   7   2  908.21   31.80
   9   7  -2  865.11   39.80
   9   7  -2  874.41   32.60
  -7  -7   2  234.18   16.80
  -7  -7   2  231.18   15.70
   7  -7  -2  216.48   13.80
   7  -7  -2  234.98   17.90
   7  -7  -2  182.98   14.90
  -7   7   2  213.48   12.50
   7   7  -2  207.98   20.30
  -7   7   2  225.28   15.90
   7   7  -2  218.68   16.10
  -5  -7   2   85.69   10.60
   5  -7  -2   78.39    8.60
   5  -7  -2   83.09   11.10
   5  -7  -2   67.89   11.10
  -5  -7   2   85.29   10.60
   5   7  -2   79.39   14.10
   5   7  -2  110.29   11.60
  -5   7   2   87.69   10.30
  -5   7   2   86.49    9.60
   3  -7  -2   54.99    7.60
   3  -7  -2   74.09   11.50
  -3  -7   2   62.79    9.40
  -3  -7   2   57.19    9.60
  -3   7   2   60.19    9.70
   3   7  -2   63.09    9.70
  -3   7   2   69.39    9.90
   3   7  -2   67.39   12.40
  -3   7   2   46.00    8.40
   1  -7  -2  357.06   16.10
   1  -7  -2  357.46   20.00
  -1  -7   2  353.06   19.40
  -1  -7   2  346.87   18.10
  -1   7   2  327.87   18.30
   1   7  -2  359.76   17.70
  -1   7   2  339.77   19.90
  -1   7   2  354.26   17.40
   1   7  -2  377.56   21.10
   1  -7   2  311.47   16.30
  -1  -7  -2  311.17   15.30
  -1  -7  -2  351.56   19.00
   1  -7   2  294.77   18.20
  -1   7  -2  288.27   16.00
   1   7   2  276.67   19.60
  -1   7  -2  274.37   17.10
  -1   7  -2  293.47   18.60
   1   7   2  304.77   17.70
   3  -7   2  392.46   20.30
   3  -7   2  400.86   19.20
  -3  -7  -2  434.16   20.70
  -3  -7  -2  419.56   18.20
   3   7   2  395.36   20.50
   3   7   2  376.76   23.60
  -3   7  -2  369.16   20.80
  -3   7  -2  373.96   17.00
  -5  -7  -2    6.20    7.60
  -5  -7  -2   13.60    7.40
   5  -7   2    7.10    7.00
   5  -7   2   11.10    7.90
  -5   7  -2   16.50    8.60
   5   7   2    3.30   10.40
   5   7   2   16.10    8.30
  -5   7  -2   15.10    4.90
  -7  -7  -2   20.90    8.60
  -7  -7  -2   45.90    9.60
   7  -7   2   32.80    9.80
   7  -7   2   36.20    8.80
   7   7   2   32.10   12.80
  -7   7  -2   33.40   10.40
   7   7   2   15.40    8.90
   9  -7   2  196.58   16.70
  -9  -7  -2  186.58   15.20
  -9  -7  -2  215.18   16.00
  -9   7  -2  231.98   18.90
   9   7   2  199.78   17.40
   9   7   2  221.58   23.90
  11  -7   2  242.98   19.00
 -11  -7  -2  265.97   19.00
 -11  -7  -2  265.37   18.30
  11   7   2  279.47   21.60
 -11   7  -2  264.77   21.10
  11   7   2  308.37   29.10
 -13  -7  -2  160.48   16.40
  13  -7   2  111.19   15.90
 -13  -7  -2  137.29   14.60
 -13   7  -2  119.79   17.90
  13   7   2  159.18   24.20
  15  -7   2  264.47   21.60
 -15  -7  -2  203.78   19.90
  15   7   2  228.78   29.50
 -15   7  -2  191.68   22.40
 -17  -7  -2   99.29   17.20
  17  -7   2   52.19   15.10
 -17   7  -2  106.09   20.20
  17   7   2  112.99   25.90
  19  -7   2   70.19   17.30
 -19  -7  -2  100.39   19.10
 -19   7  -2   89.29   22.30
  19   7   2  115.09   26.90
  21  -7   2   -7.70   14.90
 -21  -7  -2  -19.20   16.50
  21   7   2   -9.50   23.90
 -21   7  -2  -35.30   18.60
  22  -8  -2   -5.80   14.50
 -22  -8   2   -6.80   19.40
  22   8  -2  -26.30   22.90
 -22   8   2    0.00   18.90
  20  -8  -2    3.10   15.10
 -20  -8   2    3.30   16.60
 -20   8   2   14.70   17.40
  20   8  -2  -32.30   21.10
 -18  -8   2   35.50   17.10
  18  -8  -2   66.69   16.30
  18   8  -2   74.29   18.10
  18   8  -2   49.60   21.70
 -18   8   2   24.70   16.70
 -16  -8   2    8.30   14.20
  16  -8  -2    7.70   12.50
  16   8  -2   -2.10   17.90
  16   8  -2    7.20   14.10
 -16   8   2   10.80   14.60
  14  -8  -2    7.70   12.00
 -14  -8   2    9.00   12.50
 -14   8   2   19.30   12.50
  14   8  -2    6.00   12.70
  14   8  -2   25.00   18.00
  12  -8  -2   25.50   12.10
 -12  -8   2   12.50   10.90
  12   8  -2   16.90   11.60
 -12   8   2   16.80   12.10
  12   8  -2   20.90   16.70
 -10  -8   2   95.29   13.80
  10  -8  -2   56.19   12.80
 -10  -8   2   97.79   12.10
 -10   8   2   80.69   13.20
  10   8  -2  103.69   15.10
  10   8  -2   91.89   18.80
   8  -8  -2  211.88   15.70
  -8  -8   2  222.08   17.30
   8  -8  -2  192.58   17.80
  -8  -8   2  262.47   18.00
   8   8  -2  231.48   23.00
  -8   8   2  243.58   17.90
  -8   8   2  210.28   13.70
   8   8  -2  209.28   18.00
   6  -8  -2  448.76   24.70
  -6  -8   2  391.06   21.50
  -6  -8   2  409.36   21.40
   6  -8  -2  421.76   19.00
   6   8  -2  445.36   27.70
  -6   8   2  383.96   21.00
   6   8  -2  411.36   22.50
  -6   8   2  395.46   18.70
  -4  -8   2  115.99   12.70
   4  -8  -2  114.49   10.70
  -4  -8   2  122.39   13.70
   4  -8  -2  103.29   14.00
   4   8  -2   88.59   11.90
  -4   8   2  117.19   12.20
   4   8  -2  139.29   17.00
  -4   8   2  141.99   14.30
  -4   8   2  102.89   11.70
  -2  -8   2   -2.10    7.20
   2  -8  -2    6.80    8.80
  -2  -8   2   -7.40    7.80
   2  -8  -2   13.20    7.10
   2   8  -2   17.90   10.60
  -2   8   2   17.30    9.10
  -2   8   2    3.70    7.80
   2   8  -2    0.70    7.80
  -2   8   2   15.10    8.80
   0  -8  -2   46.50    8.80
   0  -8   2   52.29    9.50
   0  -8   2   41.70   10.40
   0  -8  -2   44.00   10.70
   0   8  -2   45.30   10.60
   0   8   2   45.20   10.30
   0   8  -2   46.60    9.40
   0   8  -2   44.50   10.90
   0   8   2   36.40   11.30
  -2  -8  -2   13.50    9.10
  -2  -8  -2    9.10    7.40
   2  -8   2    3.40    8.30
   2  -8   2    4.20    7.40
  -2   8  -2   -6.50    8.20
   2   8   2   -1.90    9.60
  -2   8  -2    9.40    7.80
   2   8   2    1.30    8.00
  -2   8  -2    9.80    8.40
  -4  -8  -2   84.69   11.00
   4  -8   2   48.70    9.90
  -4  -8  -2   74.69   12.00
   4  -8   2   87.69   13.00
  -4   8  -2   78.89   11.70
   4   8   2   55.19   11.70
   4   8   2   57.99   14.00
  -4   8  -2  113.19   14.20
  -6  -8  -2    4.50    8.90
   6  -8   2   22.40    9.00
   6  -8   2    8.30    9.60
  -6  -8  -2    6.50    8.50
   6   8   2    1.20    8.70
   6   8   2    2.20   11.50
  -6   8  -2   10.90   10.20
  -8  -8  -2   68.49   11.70
   8  -8   2   54.59   11.30
   8  -8   2   52.69   12.50
  -8  -8  -2   47.80   11.30
   8   8   2   59.19   13.20
  -8   8  -2   69.79   13.90
   8   8   2   68.79   17.00
 -10  -8  -2  186.08   16.90
  10  -8   2  227.78   19.50
 -10  -8  -2  184.28   16.90
  10   8   2  205.28   19.50
  10   8   2  182.08   23.90
 -10   8  -2  190.98   19.50
  12  -8   2  219.58   20.20
 -12  -8  -2  274.07   20.90
 -12  -8  -2  275.17   19.80
 -12   8  -2  272.47   23.50
  12   8   2  276.87   29.30
 -14  -8  -2  137.19   17.70
  14  -8   2   86.89   16.60
 -14   8  -2  135.29   20.10
  14   8   2  141.89   24.90
 -16  -8  -2    6.40   14.30
  16  -8   2    8.70   14.00
  16   8   2   48.40   21.90
 -16   8  -2   -2.80   16.80
  18  -8   2    6.60   15.20
 -18  -8  -2   18.00   16.70
  18   8   2   -0.20   21.10
 -18   8  -2   -4.40   18.60
 -20  -8  -2   26.20   17.60
  20  -8   2  -37.70   14.70
 -20   8  -2   10.90   20.70
  20   8   2   33.90   24.50
  21  -9  -2   42.10   17.60
 -21  -9   2    3.30   20.20
  21   9  -2    7.00   24.80
 -21   9   2   25.30   19.40
  19  -9  -2  116.99   19.50
 -19  -9   2   85.79   20.90
  19   9  -2   67.49   26.20
 -19   9   2   91.89   21.10
 -17  -9   2   17.70   16.20
  17  -9  -2   10.80   14.20
 -17   9   2   23.00   16.40
  17   9  -2   33.90   21.60
  17   9  -2   47.30   17.40
 -15  -9   2   -6.20   14.40
  15  -9  -2   -4.50   13.10
  15   9  -2    5.90   18.60
 -15   9   2   28.40   15.20
  15   9  -2   -5.30   14.70
  13  -9  -2   15.90   13.30
 -13  -9   2    3.60   12.70
  13   9  -2   10.60   17.20
  13   9  -2    9.20   13.30
 -13   9   2   12.00   13.00
  11  -9  -2   27.10   12.70
 -11  -9   2   43.00   16.00
 -11  -9   2   19.70   12.40
  11   9  -2   28.20   13.70
 -11   9   2   16.40   12.00
  11   9  -2   19.00   17.70
  -9  -9   2   50.99   13.20
  -9  -9   2   35.20   10.40
   9  -9  -2    5.30   11.40
   9   9  -2   59.49   18.30
   9   9  -2   40.10   12.90
  -9   9   2   46.00   12.00
  -7  -9   2   28.50   11.30
   7  -9  -2    6.70   11.20
  -7  -9   2   28.00   10.10
   7  -9  -2   21.20    9.10
   7   9  -2   14.40   11.60
   7   9  -2   28.00   15.50
  -7   9   2   22.40   10.50
  -5  -9   2  165.38   16.40
  -5  -9   2  169.78   16.30
   5  -9  -2  181.28   18.70
   5  -9  -2  146.89   13.10
  -5   9   2  156.78   14.50
  -5   9   2  145.49   14.90
   5   9  -2  175.08   20.60
  -5   9   2  182.18   17.00
   5   9  -2  181.48   16.70
  -3  -9   2   30.20   10.50
   3  -9  -2   32.50   11.80
  -3  -9   2   33.50   10.90
   3  -9  -2   27.10    9.10
  -3   9   2   27.10   10.70
  -3   9   2   40.70   11.20
  -3   9   2   47.20   10.90
   3   9  -2   14.40   13.10
   3   9  -2   49.60   11.50
   1  -9  -2  461.55   21.10
  -1  -9   2  442.06   24.60
   1  -9  -2  454.35   25.30
  -1  -9   2  397.46   22.90
  -1   9   2  434.66   23.40
  -1   9   2  417.66   24.60
   1   9  -2  414.56   23.50
   1   9  -2  368.26   24.70
  -1   9   2  464.95   25.50
   1   9  -2  435.46   26.00
   1  -9   2  461.35   25.50
  -1  -9  -2  419.16   25.30
   1  -9   2  440.76   22.90
  -1  -9  -2  425.36   21.40
   1   9   2  425.46   24.90
   1   9   2  372.16   25.30
  -1   9  -2  414.76   23.20
  -1   9  -2  375.76   22.70
  -1   9  -2  399.26   25.80
  -3  -9  -2  212.58   16.20
  -3  -9  -2  226.68   19.20
   3  -9   2  182.88   15.70
   3  -9   2  198.88   18.10
  -3   9  -2  179.58   18.10
   3   9   2  222.88   19.10
  -3   9  -2  240.48   18.50
   3   9   2  176.98   20.00
  -5  -9  -2  140.39   16.30
   5  -9   2  122.19   14.10
   5  -9   2  153.28   17.30
  -5  -9  -2  144.19   14.60
   5   9   2  118.89   15.40
   5   9   2  152.88   20.60
  -5   9  -2  149.79   17.50
  -7  -9  -2   82.39   13.10
   7  -9   2   61.89   14.40
   7  -9   2   80.19   12.60
  -7  -9  -2   94.19   14.20
   7   9   2  101.69   18.70
  -7   9  -2  113.89   16.90
   7   9   2   94.69   15.00
   9  -9   2   40.90   12.30
  -9  -9  -2   27.80   12.00
   9  -9   2   17.80   12.70
  -9  -9  -2   53.59   13.00
   9   9   2   41.60   16.10
  -9   9  -2   34.60   14.40
   9   9   2   51.79   17.60
  11  -9   2   21.80   13.20
 -11  -9  -2   15.90   12.70
 -11  -9  -2   38.90   13.30
 -11   9  -2   39.80   15.80
  11   9   2   33.20   17.90
  13  -9   2  117.99   18.20
 -13  -9  -2   79.19   15.80
 -13   9  -2   82.99   18.80
  13   9   2  116.19   23.90
  15  -9   2   18.40   15.80
 -15  -9  -2   32.80   15.50
 -15   9  -2   28.40   18.50
  15   9   2   34.10   20.70
 -17  -9  -2   -0.90   16.50
  17  -9   2   11.30   16.10
  17   9   2   48.40   24.20
 -17   9  -2    1.90   18.70
 -19  -9  -2   19.40   19.50
  19  -9   2   47.20   18.30
  19   9   2   28.90   23.90
 -19   9  -2   58.79   23.10
  20 -10  -2   66.19   19.10
 -20 -10   2   67.89   21.90
  20  10  -2   95.19   28.90
 -20  10   2   36.80   21.50
 -18 -10   2   95.79   21.30
  18 -10  -2  136.89   21.00
 -18  10   2   85.59   20.60
  18  10  -2  117.19   28.70
 -16 -10   2   -6.40   16.50
  16 -10  -2   24.50   15.90
 -16  10   2   13.90   16.70
  16  10  -2   37.40   17.30
  16  10  -2   73.59   24.90
  14 -10  -2   21.90   15.30
 -14 -10   2    1.70   14.70
  14  10  -2    2.50   18.60
  14  10  -2   -2.70   15.00
 -14  10   2  -13.70   14.10
  12 -10  -2   -1.90   13.60
 -12 -10   2   13.50   14.40
 -12  10   2    8.50   14.00
  12  10  -2   17.00   18.80
  12  10  -2   11.20   14.90
  10 -10  -2   58.39   15.30
 -10 -10   2   33.30   14.70
 -10 -10   2   42.90   12.20
  10  10  -2   18.80   18.00
  10  10  -2   29.20   14.60
 -10  10   2   25.90   13.10
  -8 -10   2    8.70   10.10
   8 -10  -2  -14.60   11.00
  -8 -10   2    4.10   11.90
   8 -10  -2    0.10   10.00
  -8  10   2  -21.70   10.90
   8  10  -2  -18.10   14.80
   8  10  -2    3.30   12.30
  -8  10   2   21.60   11.90
  -6 -10   2   35.00   13.20
   6 -10  -2   56.79   11.20
  -6 -10   2   45.70   12.60
   6 -10  -2   33.20   13.50
   6  10  -2   44.00   13.40
  -6  10   2   73.69   14.60
   6  10  -2   73.29   18.70
  -6  10   2   19.40   11.70
  -4 -10   2  283.27   20.90
   4 -10  -2  280.17   23.50
  -4 -10   2  343.77   23.60
   4 -10  -2  321.67   20.50
  -4  10   2  297.57   21.30
   4  10  -2  328.27   24.70
  -4  10   2  260.47   22.00
  -4  10   2  315.17   21.90
   4  10  -2  360.46   27.70
   2 -10  -2  224.08   20.90
  -2 -10   2  179.08   17.80
   2 -10  -2  198.38   15.60
  -2 -10   2  177.28   17.50
   2  10  -2  194.28   21.00
  -2  10   2  146.09   16.20
   2  10  -2  202.88   19.20
  -2  10   2  199.18   19.80
   2  10  -2  172.88   19.90
  -2  10   2  181.18   18.80
   0 -10  -2  593.44   26.10
   0 -10   2  570.54   28.00
   0 -10   2  573.24   30.30
   0 -10  -2  566.14   30.00
   0  10   2  502.25   29.10
   0  10  -2  575.34   29.40
   0  10   2  520.15   28.40
   0  10  -2  545.95   28.60
   0  10   2  534.95   30.00
   0  10  -2  473.35   29.80
  -2 -10  -2  614.14   27.90
  -2 -10  -2  655.83   32.10
   2 -10   2  644.04   29.10
   2 -10   2  665.83   32.30
   2  10   2  590.54   34.20
   2  10   2  589.24   31.60
  -2  10  -2  589.44   32.60
  -2  10  -2  616.14   30.40
   4 -10   2  365.26   22.80
  -4 -10  -2  394.16   26.80
  -4 -10  -2  369.56   23.70
   4 -10   2  402.46   26.70
   4  10   2  361.66   25.90
  -4  10  -2  388.56   25.50
   4  10   2  411.66   31.00
  -4  10  -2  376.96   27.00
   6 -10   2  229.18   18.60
   6 -10   2  228.38   21.50
  -6 -10  -2  220.98   20.60
  -6 -10  -2  247.18   19.20
  -6  10  -2  265.67   21.50
   6  10   2  253.87   26.10
   6  10   2  233.88   21.00
  -6  10  -2  240.98   22.90
   8 -10   2   26.10   12.40
   8 -10   2   35.20   14.00
  -8 -10  -2   63.09   14.70
  -8 -10  -2   57.69   14.30
  -8  10  -2   54.19   16.30
   8  10   2   72.89   18.70
 -10 -10  -2   21.30   13.20
 -10 -10  -2   37.70   13.70
  10 -10   2   -5.70   13.30
 -10  10  -2    4.00   14.10
  10  10   2   36.60   18.20
 -12 -10  -2   91.39   17.30
  12 -10   2   77.09   17.20
  12  10   2   91.49   22.60
 -12  10  -2   91.09   19.30
 -14 -10  -2   16.40   15.80
  14 -10   2   19.30   16.30
  14  10   2   -8.10   19.10
 -14  10  -2  -19.20   17.30
 -16 -10  -2   33.50   18.50
  16 -10   2   25.30   18.20
 -16  10  -2   -9.20   19.10
  16  10   2   29.40   22.30
  18 -10   2   14.30   17.60
 -18 -10  -2  -10.90   18.50
 -18  10  -2    6.20   20.20
  18  10   2   26.50   23.80
  19 -11  -2   56.49   19.60
  17 -11  -2   26.70   17.80
 -17 -11   2   11.30   19.00
  17  11  -2   11.00   24.60
  15 -11  -2   22.10   16.70
 -15 -11   2   -0.30   17.20
  15  11  -2   -1.60   16.70
  15  11  -2  -27.70   19.80
 -15  11   2   -6.90   23.30
  13 -11  -2    8.20   15.30
 -13 -11   2    3.50   16.10
  13  11  -2   11.40   19.80
 -13  11   2   -6.10   15.10
  13  11  -2    2.40   16.00
  11 -11  -2   12.00   14.40
 -11 -11   2    5.90   15.10
  11  11  -2    5.40   19.10
  11  11  -2   23.20   17.60
 -11  11   2   35.10   15.40
   9 -11  -2  -12.20   11.50
  -9 -11   2  -10.00   13.30
   9 -11  -2    6.00   14.30
  -9 -11   2   16.90   11.60
   9  11  -2    1.80   14.10
   9  11  -2   -8.00   17.20
  -9  11   2    1.40   12.20
  -9  11   2   -9.70   12.70
  -7 -11   2   72.19   15.60
   7 -11  -2   40.70   12.70
   7 -11  -2   57.39   15.90
  -7 -11   2   71.89   14.30
   7  11  -2   58.09   19.10
  -7  11   2   80.39   16.20
  -7  11   2   61.29   14.80
   7  11  -2   56.59   16.20
  -5 -11   2   35.40   14.00
  -5 -11   2   41.90   13.40
   5 -11  -2   48.80   12.30
   5 -11  -2   49.60   15.00
   5  11  -2   69.89   16.50
  -5  11   2   58.29   14.10
  -5  11   2   69.29   16.10
   5  11  -2   32.20   17.40
   3 -11  -2   16.60   11.20
   3 -11  -2   28.40   14.10
  -3 -11   2   60.79   14.10
  -3 -11   2   26.80   13.00
  -3  11   2   53.29   14.00
  -3  11   2   44.70   14.30
   3  11  -2   31.30   13.60
   3  11  -2   17.60   15.90
  -3  11   2   39.00   12.80
  -1 -11   2  107.99   16.90
  -1 -11   2  127.49   16.20
   1 -11  -2  112.19   17.60
   1  11  -2  107.39   19.00
   1  11  -2  153.28   19.00
  -1  11   2   83.19   17.20
  -1  11   2   96.49   16.20
  -1  11   2  132.09   18.00
   1  11  -2   91.59   17.50
  -1 -11  -2  136.79   16.00
   1 -11   2   92.19   16.60
  -1 -11  -2   94.29   17.20
   1 -11   2  128.09   16.10
   1  11   2  140.69   17.90
  -1  11  -2  123.79   17.30
   1  11   2  147.09   18.90
   1  11   2  132.99   19.70
  -1  11  -2  132.99   19.50
  -3 -11  -2   38.60   14.30
   3 -11   2   50.59   14.70
   3 -11   2   36.70   13.00
  -3 -11  -2   41.30   13.20
  -3  11  -2   58.49   15.30
   3  11   2   45.50   16.80
   3  11   2   26.00   14.00
  -3  11  -2   39.60   15.80
  -5 -11  -2   21.10   13.70
   5 -11   2   13.00   13.50
  -5 -11  -2   12.30   12.70
   5 -11   2   18.10   12.20
  -5  11  -2   18.40   14.00
  -5  11  -2   33.50   15.40
   5  11   2   21.50   17.70
   5  11   2   37.70   17.80
   7 -11   2   -2.90   11.80
  -7 -11  -2   14.80   13.10
   7 -11   2    4.40   13.50
  -7 -11  -2   -7.90   12.70
  -7  11  -2    3.90   15.80
   7  11   2  -17.20   15.80
  -7  11  -2   -9.80   12.90
   9 -11   2   27.60   16.10
  -9 -11  -2   -4.00   12.80
   9 -11   2  -20.80   12.10
  -9 -11  -2    6.40   14.50
   9  11   2   28.10   17.90
  -9  11  -2   -1.20   15.80
 -11 -11  -2  -17.10   15.90
 -11 -11  -2   17.00   14.90
  11 -11   2    0.00   14.50
  11  11   2   28.20   19.40
 -11  11  -2   -2.00   16.80
 -13 -11  -2   27.20   16.70
  13 -11   2  -10.50   15.30
 -13  11  -2  -24.80   17.30
  13  11   2   29.50   21.20
  15 -11   2   17.00   18.50
 -15 -11  -2   22.50   18.90
 -15  11  -2   36.50   21.10
  15  11   2   -3.80   20.20
  16 -12  -2    6.90   18.00
 -16 -12   2   16.00   20.40
  16  12  -2  -17.60   23.10
  14 -12  -2   50.69   18.60
 -14 -12   2   15.70   18.90
  14  12  -2   37.40   20.90
  14  12  -2   35.60   23.90
  12 -12  -2   74.39   19.20
 -12 -12   2   57.99   19.20
  12  12  -2   38.10   18.80
  12  12  -2   51.59   23.30
  10 -12  -2   95.49   19.30
 -10 -12   2   96.79   18.90
  10  12  -2   75.39   23.00
  10  12  -2  124.59   22.80
   8 -12  -2   24.70   16.70
  -8 -12   2   25.40   13.20
  -8 -12   2   33.70   16.20
  -8  12   2   16.40   19.40
   8  12  -2   41.40   20.10
   8  12  -2   27.90   17.10
   6 -12  -2   43.00   16.30
  -6 -12   2   93.29   16.60
  -6 -12   2   68.59   17.50
  -6  12   2   87.29   18.30
   6  12  -2   72.39   19.90
   6  12  -2   78.99   18.50
  -4 -12   2   29.80   15.10
   4 -12  -2   21.80   15.10
  -4 -12   2   21.70   13.00
   4  12  -2    3.70   14.80
   4  12  -2   12.90   17.00
  -4  12   2   18.60   15.80
  -2 -12   2   13.40   13.50
  -2 -12   2    4.80   13.60
   2 -12  -2   21.50   14.50
   2  12  -2    5.20   15.70
   2  12  -2    4.40   15.00
  -2  12   2    3.40   15.00
   0 -12   2   23.80   13.80
   0 -12  -2   27.30   14.50
   0 -12   2    6.70   13.50
   0  12   2   17.60   15.90
   0  12   2   13.80   14.50
   0  12  -2   -1.90   15.00
   0  12  -2   -7.80   15.10
  -2 -12  -2    6.50   14.10
   2 -12   2   12.80   13.10
   2 -12   2   36.70   14.20
   2  12   2  -15.60   14.30
  -2  12  -2   13.50   16.50
  -2  12  -2    0.80   15.10
  -4 -12  -2   13.60   15.10
   4 -12   2   47.00   16.00
   4 -12   2   20.00   13.40
  -4  12  -2   24.60   16.20
   4  12   2   39.00   18.50
  -4  12  -2   26.90   17.20
  -6 -12  -2   10.90   15.40
   6 -12   2   21.30   15.90
   6 -12   2    0.00   13.00
  -6  12  -2   16.50   17.50
   6  12   2  -22.50   16.90
  -6  12  -2   -6.40   14.80
   8 -12   2   14.80   14.40
  -8 -12  -2   46.00   16.90
   8 -12   2    5.20   15.60
   8  12   2   -0.90   17.50
  -8  12  -2   14.00   16.20
  -8  12  -2   42.20   18.20
 -10 -12  -2   18.50   18.30
  10 -12   2   28.70   16.70
  10  12   2   62.29   22.70
 -10  12  -2   32.00   19.60
  12 -12   2   35.20   18.50
  12  12   2   43.60   22.70
 -12  12  -2   -9.50   19.60
  14 -12   2   34.30   19.70
  14  12   2   31.70   24.10
 -14  12  -2   42.20   21.60
  13 -13  -2   41.00   19.60
 -13 -13   2   46.40   19.90
  13  13  -2   32.80   29.10
  13  13  -2  -14.20   21.80
  11 -13  -2   93.89   21.00
 -11 -13   2   98.59   21.70
  11  13  -2   56.69   22.00
  11  13  -2   79.59   24.20
   9 -13  -2   50.99   18.40
  -9 -13   2   41.70   18.40
   9  13  -2   62.69   20.50
   9  13  -2   24.80   20.60
   7 -13  -2   20.20   16.60
  -7 -13   2   69.09   18.60
  -7 -13   2   64.79   15.80
   7  13  -2   65.59   21.00
   7  13  -2   67.09   20.20
  -5 -13   2   28.00   16.80
  -5 -13   2   38.00   14.60
   5 -13  -2   28.30   16.50
   5  13  -2   34.80   18.60
   5  13  -2   22.40   17.80
  -3 -13   2  119.79   19.00
  -3 -13   2   73.69   17.00
   3 -13  -2   67.59   18.30
   3  13  -2   82.79   20.80
   3  13  -2  116.59   21.80
   1 -13  -2  115.69   19.80
  -1 -13   2  111.49   19.00
  -1 -13   2   96.09   18.00
   1  13  -2   81.09   20.80
   1  13  -2  112.49   21.40
   1 -13   2   45.90   16.20
  -1 -13  -2   36.80   16.90
   1 -13   2   50.89   16.70
  -1  13  -2   75.99   20.40
   1  13   2   46.10   17.70
  -1  13  -2   48.80   19.00
  -3 -13  -2   39.60   16.30
   3 -13   2   61.79   16.20
   3 -13   2   45.40   16.90
  -3  13  -2   59.59   20.20
   3  13   2   50.09   19.00
  -3  13  -2   71.99   20.70
   5 -13   2   12.20   14.40
   5 -13   2   15.70   16.00
  -5 -13  -2    3.20   15.10
   5  13   2   63.89   20.60
  -5  13  -2   44.90   20.30
  -5  13  -2   16.80   17.60
  -7 -13  -2    7.00   16.10
   7 -13   2   -9.00   15.00
   7 -13   2    5.90   16.10
   7  13   2    5.00   19.00
  -7  13  -2    6.70   18.90
  -7  13  -2  -31.80   17.60
  -9 -13  -2   21.90   19.20
   9 -13   2   20.60   17.00
   9 -13   2   71.49   19.60
   9  13   2   66.59   22.90
  -9  13  -2   47.70   21.90
  -9  13  -2   74.09   21.70
  11 -13   2   52.09   20.00
  11  13   2   73.59   24.70
 -11  13  -2   41.30   22.10
 -11  13  -2   62.79   23.10
  -8 -14   2   16.90   18.10
   8 -14  -2   39.00   18.60
   8  14  -2   15.50   20.80
   8  14  -2   11.00   20.20
  -6 -14   2   28.10   15.50
  -6 -14   2  -12.90   17.10
   6 -14  -2   46.40   18.70
   6  14  -2   29.90   19.50
   6  14  -2   30.90   21.00
   4 -14  -2   38.20   17.30
  -4 -14   2   32.90   17.30
  -4 -14   2   46.30   16.60
   4  14  -2   32.20   20.10
   4  14  -2   26.70   19.60
  -2 -14   2   60.29   16.90
  -2 -14   2   33.60   16.70
   2 -14  -2   50.09   18.80
   2  14  -2   13.40   20.90
   2  14  -2   21.60   19.70
   0 -14   2   58.49   16.90
   0 -14   2   56.49   17.50
   0 -14  -2   73.99   19.50
   0  14  -2   73.19   21.30
   0  14  -2   26.20   20.90
   2 -14   2  -10.30   14.70
   2 -14   2   15.60   16.10
  -2 -14  -2   19.10   17.10
  -2  14  -2    8.80   19.20
  -2  14  -2    5.20   19.90
  -4 -14  -2   32.10   18.40
   4 -14   2    9.00   16.20
   4 -14   2   42.50   17.60
   4  14   2   55.69   20.20
  -4  14  -2    8.20   19.60
  -4  14  -2   53.79   22.00
   6 -14   2   17.50   18.10
  -6 -14  -2   45.00   18.10
   6 -14   2   12.30   16.70
   6  14   2   19.10   19.90
  -6  14  -2   52.29   22.20
  -6  14  -2    3.70   19.60
 -28   0   3   15.80   20.50
 -26   0   3  -10.00   16.70
 -24   0   3   11.50   15.70
 -22   0   3    7.10   12.40
  22   0  -3    9.80   16.60
 -20   0   3    7.00   10.80
  20   0  -3   26.70   15.00
  20   0  -3  -10.80   13.60
  18   0  -3    1.50   10.00
  18   0  -3   -8.50   11.00
 -18   0   3   -3.60    8.30
  16   0  -3   -8.70    8.40
  16   0  -3    8.70    4.70
  16   0  -3    6.90    8.30
 -16   0   3   12.70    7.70
  14   0  -3   -6.40    3.40
  14   0  -3    2.70    7.10
  14   0  -3   -0.30    6.60
 -14   0   3   11.10    6.50
  12   0  -3    3.00    2.90
  12   0  -3    3.90    6.00
 -12   0   3    4.70    5.10
  12   0  -3   -4.90    5.20
 -10   0   3   -1.00    3.90
 -10   0   3    6.50    4.20
  10   0  -3    3.00    4.60
  10   0  -3    5.30    4.50
  10   0  -3    4.90    2.30
   8   0  -3    4.00    3.70
  -8   0   3    0.80    3.30
   8   0  -3    3.30    3.70
   8   0  -3    4.50    1.80
  -8   0   3    4.60    3.50
   6   0  -3    0.80    2.70
   6   0  -3    3.30    3.10
   6   0  -3    5.80    2.00
  -6   0   3    2.10    2.50
  -6   0   3   -0.30    2.40
  -4   0   3   -2.30    2.00
   4   0  -3   -2.90    1.80
  -4   0   3    1.50    2.00
   4   0  -3    1.90    1.50
   4   0  -3   -0.50    2.20
   2   0  -3   -4.00    1.50
  -2   0   3   -1.00    1.70
  -2   0   3    2.70    1.80
  -2   0   3    0.10    2.20
   2   0  -3   -2.00    1.40
   0   0  -3    0.20    1.80
   0   0   3    0.90    1.50
   0   0   3    1.10    1.90
   0   0  -3   -0.60    1.40
   0   0  -3    0.30    1.80
   0   0   3   -2.20    1.90
  -2   0  -3    0.10    2.40
  -2   0  -3    1.50    2.70
  -2   0  -3    3.00    2.00
   2   0   3   -1.00    2.40
   2   0   3    1.00    2.30
  -4   0  -3    2.30    3.20
  -4   0  -3    2.30    2.40
   4   0   3    0.00    2.60
  -4   0  -3   -0.60    2.80
   4   0   3   -3.40    1.90
   4   0   3   -1.30    3.20
   6   0   3    4.00    4.70
  -6   0  -3    6.70    4.10
  -6   0  -3   -1.80    3.30
   6   0   3   -0.90    2.80
   6   0   3   -4.00    3.20
  -8   0  -3    1.50    5.00
  -8   0  -3   -8.60    3.70
   8   0   3   -3.40    4.00
   8   0   3   -9.80    5.40
   8   0   3   -2.10    4.20
  10   0   3    6.70    5.10
  10   0   3   -5.60    5.20
  10   0   3   -0.20    7.60
 -10   0  -3   -3.20    5.40
 -10   0  -3   -2.20    4.60
 -12   0  -3   11.20    7.30
  12   0   3   -5.30    5.70
  12   0   3    0.20    8.60
 -12   0  -3    3.40    5.90
  14   0   3   -9.90   10.00
 -14   0  -3   -4.40    6.10
 -14   0  -3   -4.20    7.80
  14   0   3   -0.50    6.70
  16   0   3  -11.40   12.00
  16   0   3   -2.40    7.60
 -16   0  -3  -18.30    8.90
 -16   0  -3    8.80    7.80
 -18   0  -3   -1.80    8.00
 -18   0  -3    0.10   11.10
  18   0   3    8.30    9.20
 -20   0  -3    2.00   13.40
  20   0   3    0.10    9.70
 -22   0  -3   16.20   16.50
 -24   0  -3  -43.80   16.40
 -27  -1   3   44.40   19.80
 -27   1   3    2.20   18.40
 -25  -1   3  106.29   20.30
 -25   1   3  121.39   20.30
 -23  -1   3    3.30   13.90
 -23   1   3   22.50   14.70
  23   1  -3  -22.70   17.80
 -21  -1   3   -3.90   11.40
  21  -1  -3   -2.20   14.10
 -21   1   3    4.50   11.60
  21   1  -3  -17.30   15.30
  19  -1  -3  525.55   26.50
 -19  -1   3  537.45   26.70
  19  -1  -3  565.74   31.10
  19   1  -3  599.54   34.20
  19   1  -3  533.45   27.50
 -19   1   3  533.85   26.50
  17  -1  -3  503.05   25.40
  17  -1  -3  475.75   17.10
  17  -1  -3  453.65   23.30
 -17  -1   3  453.55   22.60
  17   1  -3  476.75   23.80
  17   1  -3  519.35   28.60
 -17   1   3  509.55   23.20
  15  -1  -3 1290.97   39.90
  15  -1  -3 1358.46   41.30
 -15  -1   3 1340.27   40.20
  15  -1  -3 1345.37   34.70
 -15  -1   3 1334.47   33.40
  15   1  -3 1327.07   44.30
  15   1  -3 1349.07   40.10
 -15   1   3 1302.77   39.80
  15   1  -3 1319.17   33.40
  13  -1  -3 1170.58   29.90
  13  -1  -3 1097.19   34.40
 -13  -1   3 1175.68   34.60
  13  -1  -3 1110.79   34.10
 -13  -1   3 1133.99   28.30
  13   1  -3 1113.39   36.70
 -13   1   3 1169.88   34.20
  13   1  -3 1146.19   34.10
  13   1  -3 1151.48   28.40
  11  -1  -3  390.66   15.70
  11  -1  -3  379.56   12.10
  11  -1  -3  364.06   15.00
 -11  -1   3  360.66   15.40
 -11   1   3  364.06   15.00
  11   1  -3  367.16   17.10
  11   1  -3  387.16   15.50
 -11   1   3  373.66   15.00
   9  -1  -3   78.49    7.00
  -9  -1   3   92.69    7.30
   9  -1  -3   77.19    5.60
   9  -1  -3   86.49    7.00
   9   1  -3   76.19    6.50
  -9   1   3   84.09    7.10
   9   1  -3   79.39    8.00
  -9   1   3   79.79    6.60
   7  -1  -3  758.72   21.50
  -7  -1   3  771.62   21.60
   7  -1  -3  739.23   21.00
  -7  -1   3  756.52   22.70
   7  -1  -3  761.62   20.60
  -7   1   3  742.93   21.30
   7   1  -3  771.42   22.60
   7   1  -3  753.82   20.90
  -7   1   3  770.82   20.90
   5  -1  -3  509.25   14.90
  -5  -1   3  510.05   15.30
   5  -1  -3  540.45   15.50
  -5  -1   3  501.15   15.70
   5   1  -3  524.25   15.80
  -5   1   3  515.15   14.00
   5   1  -3  510.85   14.20
  -5   1   3  501.95   15.00
   3  -1  -3  572.74   15.80
  -3  -1   3  579.64   14.30
  -3  -1   3  564.84   16.00
   3  -1  -3  567.34   15.60
  -3  -1   3  604.44   16.40
  -3   1   3  557.74   14.00
  -3   1   3  597.34   16.40
   3   1  -3  585.94   14.30
   3   1  -3  564.64   15.80
   1  -1  -3 1038.20   26.70
  -1  -1   3 1100.49   26.70
  -1  -1   3 1075.39   27.00
  -1  -1   3 1109.29   26.40
   1  -1  -3 1077.69   26.80
  -1   1   3 1068.29   28.00
   1   1  -3 1084.79   26.40
  -1   1   3 1114.39   28.00
   1   1  -3 1069.29   27.70
  -1  -1  -3  225.98    8.10
  -1  -1  -3  234.38    7.20
  -1  -1  -3  217.98    8.10
   1  -1   3  243.98    7.40
   1  -1   3  227.58    8.00
   1  -1   3  217.58    7.90
   1   1   3  230.68    9.50
   1   1   3  235.48    8.30
   1   1   3  173.28    7.40
  -1   1  -3  215.98    6.50
  -1   1  -3  225.28    8.90
  -3  -1  -3  239.58    8.90
   3  -1   3  231.48    8.10
   3  -1   3  227.58    9.00
  -3  -1  -3  253.17    9.40
  -3  -1  -3  252.97    9.30
   3   1   3  243.98   11.40
   3   1   3  226.68    9.10
  -3   1  -3  245.38   10.20
  -3   1  -3  248.28    8.30
   5  -1   3 1655.43   41.40
  -5  -1  -3 1653.73   41.50
  -5  -1  -3 1667.23   41.30
   5  -1   3 1629.04   40.80
   5   1   3 1659.93   41.50
  -5   1  -3 1666.13   40.90
   5   1   3 1544.85   45.20
  -5   1  -3 1635.04   42.40
   5   1   3 1655.93   41.40
  -7  -1  -3  343.77   13.00
  -7  -1  -3  356.26   14.10
   7  -1   3  337.87   13.80
   7  -1   3  349.67   13.30
   7   1   3  339.77   13.90
   7   1   3  336.17   13.20
  -7   1  -3  363.16   14.70
  -7   1  -3  338.17   14.60
   7   1   3  357.36   18.50
   9  -1   3 1719.63   44.80
  -9  -1  -3 1694.53   44.60
  -9  -1  -3 1711.73   46.10
   9  -1   3 1701.03   47.40
   9  -1   3 1778.72   45.70
  -9   1  -3 1726.73   47.20
   9   1   3 1790.72   46.10
   9   1   3 1711.73   44.80
   9   1   3 1619.44   52.79
  11  -1   3  692.73   23.50
 -11  -1  -3  725.33   23.10
 -11  -1  -3  723.93   25.10
  11  -1   3  752.62   27.80
  11  -1   3  717.73   24.40
  11   1   3  623.54   31.90
 -11   1  -3  672.13   25.60
  11   1   3  728.73   25.00
  11   1   3  713.63   23.30
 -13  -1  -3  229.98   16.20
 -13  -1  -3  238.18   14.00
  13  -1   3  218.18   18.20
  13  -1   3  219.98   14.50
  13   1   3  260.47   14.50
  13   1   3  274.67   25.00
 -13   1  -3  249.08   17.30
 -13   1  -3  247.98   15.00
  15  -1   3   92.39   11.00
 -15  -1  -3   77.49   12.10
  15  -1   3   90.39   17.50
 -15  -1  -3  104.39   10.80
 -15   1  -3   79.39   10.50
 -15   1  -3   66.39   12.00
  15   1   3   87.09   19.00
  15   1   3   94.59   10.60
 -17  -1  -3    2.70   10.40
  17  -1   3  -10.10    8.30
 -17  -1  -3   -1.10    7.60
 -17   1  -3    3.80    8.40
  17   1   3    0.00   14.80
  17   1   3    2.90    8.10
 -17   1  -3   -9.70   10.30
 -19  -1  -3  145.49   14.60
 -19  -1  -3  155.98   18.30
  19  -1   3  176.78   15.30
  19   1   3  143.59   14.60
 -19   1  -3  138.89   14.60
 -19   1  -3  135.69   18.50
  21  -1   3  119.19   20.40
 -21  -1  -3  142.99   19.90
 -21   1  -3  119.29   19.90
 -23  -1  -3    1.00   17.50
 -23   1  -3   11.30   18.80
 -25  -1  -3  -32.60   18.20
 -25   1  -3  -14.40   19.70
 -28  -2   3   -5.40   19.50
 -28   2   3    9.90   19.50
 -26  -2   3  119.59   22.00
 -26   2   3   84.49   20.70
  26   2  -3  131.19   31.80
 -24  -2   3   67.79   17.70
 -24   2   3   19.30   16.00
  24   2  -3   39.90   23.70
 -22  -2   3   17.80   13.40
  22   2  -3   -7.70   18.50
 -22   2   3   -1.50   12.90
 -20  -2   3   56.09   13.00
 -20   2   3   67.79   13.50
  20   2  -3   69.79   19.70
  20   2  -3   65.19   14.20
  18  -2  -3  521.75   19.40
 -18  -2   3  533.05   25.20
  18  -2  -3  517.45   26.40
  18  -2  -3  509.55   25.50
  18   2  -3  521.15   25.80
 -18   2   3  495.75   24.70
  18   2  -3  487.65   31.00
  16  -2  -3  790.42   29.20
 -16  -2   3  789.42   28.80
  16  -2  -3  762.42   23.80
  16  -2  -3  738.83   28.70
 -16   2   3  811.32   29.10
  16   2  -3  742.03   28.60
  16   2  -3  742.13   33.80
  14  -2  -3 1289.07   39.00
  14  -2  -3 1386.16   40.30
  14  -2  -3 1372.66   36.20
 -14  -2   3 1406.66   40.50
 -14   2   3 1321.87   39.90
  14   2  -3 1322.17   39.60
  14   2  -3 1392.26   45.40
 -12  -2   3 1518.35   42.60
  12  -2  -3 1529.85   42.50
  12  -2  -3 1510.75   41.20
  12  -2  -3 1543.55   39.30
 -12   2   3 1519.55   41.90
  12   2  -3 1491.45   46.00
  12   2  -3 1532.85   42.10
 -12   2   3 1516.05   41.50
  10  -2  -3  392.86   14.30
  10  -2  -3  427.66   16.60
 -10  -2   3  417.56   16.20
  10  -2  -3  400.26   14.80
  10   2  -3  423.26   16.00
  10   2  -3  453.15   18.90
 -10   2   3  433.86   15.80
 -10   2   3  407.66   14.90
   8  -2  -3   31.10    5.00
   8  -2  -3   33.00    4.60
  -8  -2   3   32.50    5.30
   8  -2  -3   35.40    5.80
  -8   2   3   32.10    4.40
  -8   2   3   36.20    4.80
   8   2  -3   29.60    6.00
   8   2  -3   29.60    5.10
  -6  -2   3 3979.50   96.09
   6  -2  -3 3990.90   95.49
   6  -2  -3 4042.70   96.39
   6   2  -3 4089.09   96.89
  -6   2   3 4154.98   94.09
   6   2  -3 4007.70   94.39
  -6   2   3 4071.59   94.99
   4  -2  -3  956.60   27.30
   4  -2  -3 1030.10   26.70
  -4  -2   3  990.20   26.70
  -4  -2   3  957.50   23.80
  -4  -2   3  963.10   26.90
   4   2  -3  999.80   24.80
  -4   2   3  964.50   26.10
  -4   2   3  997.60   24.10
   4   2  -3  994.00   26.70
  -2  -2   3 3594.74   83.29
  -2  -2   3 3623.84   84.39
   2  -2  -3 3586.54   85.29
   2  -2  -3 3612.64   85.09
  -2  -2   3 3490.35   85.09
  -2   2   3 3611.84   84.79
   2   2  -3 3622.24   82.99
   2   2  -3 3716.53   84.19
  -2   2   3 3628.34   85.59
   0  -2   3   11.00    3.00
   0  -2   3   11.80    2.30
   0  -2  -3   12.50    3.20
   0  -2  -3   12.00    1.80
   0  -2   3   13.20    2.60
   0   2  -3   16.20    2.30
   0   2  -3   14.20    2.50
   0   2   3   11.60    3.30
   0   2   3    8.70    3.90
   0   2  -3   10.90    4.00
   2  -2   3  211.68    6.60
  -2  -2  -3  222.38    7.80
   2  -2   3  216.18    8.60
   2  -2   3  224.18    9.20
  -2  -2  -3  212.58    8.90
  -2   2  -3  211.78    7.50
  -2   2  -3  227.88   10.60
   2   2   3  215.78    9.40
  -2   2  -3  220.78    6.50
   2   2   3  217.68   11.80
   4  -2   3 1091.69   27.00
  -4  -2  -3 1137.49   29.50
   4  -2   3 1089.29   29.80
  -4  -2  -3 1150.88   29.90
   4   2   3 1129.49   35.00
  -4   2  -3 1143.09   29.20
  -4   2  -3 1159.58   31.80
   4   2   3 1166.28   30.60
   4   2   3 1152.68   30.40
  -6  -2  -3 1682.03   42.40
   6  -2   3 1653.93   42.30
  -6  -2  -3 1646.94   41.90
   6  -2   3 1619.54   39.50
  -6   2  -3 1644.74   41.70
   6   2   3 1641.34   42.30
   6   2   3 1630.84   49.30
   6   2   3 1667.73   43.00
  -6   2  -3 1625.74   44.00
  -8  -2  -3 3386.96   81.09
  -8  -2  -3 3291.87   79.89
   8  -2   3 3267.57   78.59
   8  -2   3 3253.27   80.29
  -8   2  -3 3255.77   82.49
   8   2   3 3319.17   90.29
   8   2   3 3299.27   80.19
   8   2   3 3268.17   81.29
  -8   2  -3 3412.76   82.99
  10  -2   3  868.11   27.20
  10  -2   3  890.41   27.10
  10  -2   3  919.61   28.20
 -10  -2  -3  904.21   28.70
 -10  -2  -3  889.81   26.70
 -10   2  -3  889.21   29.90
  10   2   3  927.51   29.20
  10   2   3  920.61   27.40
  10   2   3  876.71   37.90
  12  -2   3  649.83   23.30
  12  -2   3  632.64   23.70
 -12  -2  -3  647.74   24.60
 -12  -2  -3  672.33   22.30
  12   2   3  665.53   26.90
  12   2   3  587.04   34.00
 -12   2  -3  663.53   26.40
  12   2   3  654.33   22.80
 -14  -2  -3  152.18   11.70
 -14  -2  -3  129.49   13.50
  14  -2   3  143.89   12.20
  14   2   3  160.78   22.70
  14   2   3  138.49   11.50
 -14   2  -3  148.29   14.90
  16  -2   3    7.00    8.60
 -16  -2  -3   11.30    7.80
 -16  -2  -3   23.50   10.70
  16   2   3   18.50    8.50
  16   2   3    7.00   15.70
 -16   2  -3    7.00   10.70
 -18  -2  -3  340.37   19.60
  18  -2   3  360.16   21.00
 -18  -2  -3  334.17   24.60
  18   2   3  369.26   34.90
 -18   2  -3  345.17   25.00
 -18   2  -3  339.17   20.90
  18   2   3  340.87   20.00
 -20  -2  -3  138.09   18.30
  20  -2   3   85.79   13.70
  20   2   3  103.19   24.70
 -20   2  -3   93.49   18.10
 -20   2  -3  101.79   14.10
 -22  -2  -3   20.70   16.80
 -22   2  -3  -32.40   16.20
 -24  -2  -3   14.80   18.90
 -24   2  -3   13.10   20.30
 -27  -3   3    3.70   19.10
  27   3  -3    1.10   27.10
 -27   3   3    4.90   19.10
 -25  -3   3  -21.90   16.20
 -25   3   3   11.00   17.10
  25   3  -3  -34.50   22.30
 -23  -3   3   30.80   16.00
 -23   3   3   10.40   14.90
  23   3  -3  -28.90   20.00
 -21  -3   3  112.69   17.00
  21   3  -3   69.39   22.90
 -21   3   3  160.28   18.10
  21   3  -3  110.29   21.10
  19  -3  -3  259.57   16.00
 -19  -3   3  259.17   19.60
  19   3  -3  267.37   19.90
 -19   3   3  228.78   18.70
  19   3  -3  274.47   28.30
  17  -3  -3  525.05   24.50
  17  -3  -3  568.84   26.50
  17  -3  -3  581.44   21.30
 -17  -3   3  538.75   25.40
  17   3  -3  536.55   32.70
 -17   3   3  569.84   25.90
  17   3  -3  525.45   25.20
  15  -3  -3  495.95   19.10
  15  -3  -3  513.95   23.40
 -15  -3   3  515.35   22.50
  15  -3  -3  488.45   20.60
  15   3  -3  485.45   22.70
 -15   3   3  498.95   22.60
  15   3  -3  472.15   27.60
 -13  -3   3  194.28   14.20
  13  -3  -3  184.58   11.70
  13  -3  -3  170.28   13.70
  13  -3  -3  185.38   12.10
  13   3  -3  230.88   18.40
 -13   3   3  181.98   11.50
  13   3  -3  191.58   13.50
 -13   3   3  194.38   14.00
 -11  -3   3  853.11   28.10
  11  -3  -3  865.91   26.50
  11  -3  -3  850.71   28.10
  11  -3  -3  874.31   25.60
 -11   3   3  893.11   26.00
  11   3  -3  926.81   32.50
 -11   3   3  885.11   27.40
  11   3  -3  910.91   28.10
   9  -3  -3    4.20    4.70
  -9  -3   3    9.20    5.00
   9  -3  -3    7.80    5.20
  -9  -3   3    2.40    3.00
   9  -3  -3    3.50    3.70
  -9   3   3    4.40    4.60
  -9   3   3    8.70    3.90
   9   3  -3   11.90    6.90
   9   3  -3   11.50    5.20
   7  -3  -3   -4.30    4.10
  -7  -3   3    1.90    4.10
  -7  -3   3   -0.40    2.90
   7  -3  -3   -1.20    4.30
  -7   3   3    0.90    3.50
  -7   3   3   -3.10    3.00
   7   3  -3    1.80    3.90
   7   3  -3   -0.70    5.60
  -5  -3   3  345.57   13.80
   5  -3  -3  348.07   13.90
   5  -3  -3  360.16   14.90
  -5  -3   3  325.07   11.30
   5   3  -3  349.37   14.40
  -5   3   3  361.66   11.50
  -5   3   3  353.56   12.60
   5   3  -3  347.47   12.30
   3  -3  -3 1725.13   40.60
  -3  -3   3 1761.12   44.50
   3  -3  -3 1674.23   45.20
  -3  -3   3 1721.83   42.30
   3  -3  -3 1697.23   44.50
  -3   3   3 1737.03   41.30
   3   3  -3 1729.33   42.50
  -3   3   3 1760.72   44.30
   3   3  -3 1742.93   44.00
   1  -3  -3   15.10    4.30
  -1  -3   3   16.50    3.30
   1  -3  -3   16.10    2.50
  -1  -3   3   18.30    4.10
  -1   3   3   24.00    5.30
   1   3  -3   12.50    3.80
   1   3  -3   14.90    3.20
   1   3  -3   19.20    3.40
  -1   3   3   16.70    4.10
   1  -3   3  720.33   20.70
  -1  -3  -3  684.33   20.50
   1  -3   3  703.13   20.10
  -1  -3  -3  680.03   18.50
   1   3   3  651.93   23.40
  -1   3  -3  677.73   22.00
  -1   3  -3  726.33   19.30
  -1   3  -3  707.63   18.30
   1   3   3  701.33   21.50
   3  -3   3  119.49    8.10
   3  -3   3  118.79    7.70
  -3  -3  -3  141.69    7.90
  -3   3  -3  131.69    9.60
  -3   3  -3  118.89    6.60
   3   3   3  125.59   11.70
   5  -3   3  323.17   13.00
   5  -3   3  287.87   12.60
  -5  -3  -3  303.57   11.80
  -5  -3  -3  307.07   12.20
   5   3   3  298.37   13.30
  -5   3  -3  297.47   11.40
  -5   3  -3  311.87   14.40
   5   3   3  253.47   17.40
  -7  -3  -3  817.12   24.40
  -7  -3  -3  849.22   25.10
   7  -3   3  805.72   25.30
  -7   3  -3  854.61   27.60
   7   3   3  778.92   33.20
   7   3   3  842.32   26.30
  -7   3  -3  827.12   24.50
  -9  -3  -3  691.63   23.70
   9  -3   3  684.43   23.10
  -9  -3  -3  700.13   22.30
   9   3   3  730.63   24.50
   9   3   3  638.84   32.20
  -9   3  -3  716.23   25.80
  11  -3   3  331.87   16.40
 -11  -3  -3  342.07   17.60
 -11  -3  -3  335.27   15.10
 -11   3  -3  350.16   19.40
  11   3   3  354.06   28.80
  11   3   3  323.87   18.10
  11   3   3  295.97   15.50
 -13  -3  -3  355.76   16.80
  13  -3   3  367.76   18.40
 -13  -3  -3  349.57   19.80
  13   3   3  351.56   17.50
 -13   3  -3  365.26   21.70
  13   3   3  386.16   31.50
 -15  -3  -3  437.46   20.10
  15  -3   3  468.05   21.80
 -15  -3  -3  479.65   25.00
  15   3   3  456.75   21.10
  15   3   3  514.95   36.40
 -15   3  -3  409.46   25.50
 -17  -3  -3    2.50   11.20
  17  -3   3   -9.90    9.00
 -17  -3  -3    3.10    8.30
  17   3   3   -4.00   16.00
 -17   3  -3  -17.90   12.20
  17   3   3    1.00    8.50
  19  -3   3   25.40   11.50
 -19  -3  -3    9.80   13.60
  19   3   3   26.90   20.30
 -19   3  -3   13.00   14.60
  21  -3   3   -0.50   11.60
 -21  -3  -3    5.70   16.10
 -21   3  -3    3.60   11.50
 -21   3  -3   20.10   18.00
  21   3   3   15.40   21.50
 -23  -3  -3   15.50   18.40
 -23   3  -3   21.00   19.70
 -26  -4   3   85.09   22.20
 -26   4   3   80.29   21.90
  26   4  -3  138.09   32.90
 -24  -4   3  254.57   25.30
  24   4  -3  208.48   34.40
 -24   4   3  192.68   23.10
 -22  -4   3  117.09   18.50
  22   4  -3  110.09   27.10
 -22   4   3  122.79   19.00
  20  -4  -3   43.30   10.60
 -20  -4   3   72.69   15.50
 -20   4   3   45.90   14.30
  20   4  -3   29.50   21.10
  20   4  -3   45.10   14.50
 -18  -4   3   65.99   12.90
  18  -4  -3   61.29   10.30
 -18   4   3   59.09   13.20
  18   4  -3   60.49   18.80
  18   4  -3   51.29   14.00
 -16  -4   3   27.10    9.40
  16  -4  -3   21.60    8.40
  16  -4  -3   24.30    8.00
  16  -4  -3   19.40   11.20
 -16   4   3   32.80   10.20
  16   4  -3   38.30   15.20
  16   4  -3   26.70   10.60
  14  -4  -3    7.20    6.90
 -14  -4   3    4.90    7.60
  14  -4  -3   -3.90    5.80
  14  -4  -3   11.70    8.20
  14   4  -3   -1.60   11.10
 -14   4   3   13.20    5.90
  14   4  -3   10.80    8.00
 -14   4   3    5.20    8.40
  12  -4  -3  144.69   12.20
  12  -4  -3  155.58   10.10
  12  -4  -3  129.89   11.40
 -12  -4   3  149.09    8.60
 -12  -4   3  150.78   12.40
 -12   4   3  141.69    9.80
  12   4  -3  162.08   16.70
  12   4  -3  142.39   12.00
 -12   4   3  165.98   12.50
  10  -4  -3  260.87   14.60
  10  -4  -3  270.57   14.90
  10  -4  -3  257.67   11.60
 -10  -4   3  288.17   15.20
 -10  -4   3  271.17   11.40
 -10   4   3  249.68   11.70
 -10   4   3  247.78   13.40
  10   4  -3  264.67   14.20
  10   4  -3  249.97   18.00
  -8  -4   3 1959.20   52.49
  -8  -4   3 2137.69   55.69
   8  -4  -3 2112.69   55.39
   8  -4  -3 2121.19   56.39
   8   4  -3 2164.78   58.79
  -8   4   3 2143.09   53.39
   8   4  -3 2162.68   54.39
  -8   4   3 2079.39   52.59
   6  -4  -3 1719.23   46.10
  -6  -4   3 1586.74   42.50
  -6  -4   3 1655.03   44.60
   6  -4  -3 1626.54   44.40
  -6   4   3 1675.83   42.00
   6   4  -3 1648.14   46.30
  -6   4   3 1597.14   42.30
   6   4  -3 1653.83   43.10
   4  -4  -3 2032.90   49.10
  -4  -4   3 1939.41   51.39
   4  -4  -3 2030.30   53.39
   4  -4  -3 2045.70   54.59
  -4  -4   3 2075.09   53.39
   4   4  -3 2072.29   51.59
   4   4  -3 2054.19   53.99
  -4   4   3 2080.29   52.29
  -4   4   3 2128.09   50.29
  -2  -4   3 1530.65   41.10
  -2  -4   3 1550.24   40.10
   2  -4  -3 1539.95   37.50
   2  -4  -3 1555.34   42.60
  -2   4   3 1513.55   38.30
   2   4  -3 1509.55   40.80
  -2   4   3 1541.45   41.90
  -2   4   3 1570.14   41.20
   2   4  -3 1533.35   39.40
   0  -4  -3 1450.45   38.40
   0  -4  -3 1400.06   34.70
   0  -4   3 1332.77   36.90
   0  -4   3 1401.86   36.90
   0   4  -3 1341.87   35.90
   0   4   3 1411.56   40.20
   0   4  -3 1395.76   39.00
   0   4  -3 1352.96   35.30
   0   4  -3 1349.77   36.00
   0   4   3 1365.36   37.80
   2  -4   3  566.34   18.70
  -2  -4  -3  567.04   19.00
   2  -4   3  560.84   19.00
  -2  -4  -3  586.44   17.30
  -2   4  -3  547.15   17.70
  -2   4  -3  536.35   16.80
  -2   4  -3  582.54   20.70
   2   4   3  546.05   19.80
   2   4   3  545.05   23.00
   4  -4   3  208.28   11.30
   4  -4   3  203.38   11.50
  -4  -4  -3  195.58   10.00
  -4  -4  -3  198.88   10.80
   4   4   3  209.48   17.00
  -4   4  -3  251.07   13.70
   4   4   3  217.48   12.30
  -4   4  -3  222.48   10.20
  -6  -4  -3  163.18   10.40
   6  -4   3  172.18   11.30
   6  -4   3  158.18   11.30
  -6  -4  -3  176.68   10.20
  -6   4  -3  174.28   12.90
   6   4   3  154.48   11.90
   6   4   3  187.38   18.50
  -6   4  -3  183.58    9.70
   8  -4   3  235.68   13.50
  -8  -4  -3  227.78   13.30
  -8  -4  -3  227.58   12.40
   8   4   3  211.58   13.90
  -8   4  -3  239.88   12.00
  -8   4  -3  239.18   15.60
   8   4   3  206.88   21.00
 -10  -4  -3   84.19    8.90
 -10  -4  -3   75.19    9.70
  10  -4   3   65.79    9.30
  10   4   3  104.29   17.20
  10   4   3   97.39   10.80
 -10   4  -3   75.99   11.20
 -12  -4  -3   49.90    8.30
  12  -4   3   52.19    9.60
 -12  -4  -3   64.09   10.30
 -12   4  -3   62.69   12.10
  12   4   3   57.59   17.10
 -14  -4  -3  -11.90    8.40
 -14  -4  -3    3.30    7.40
  14  -4   3   -7.20    8.30
  14   4   3   11.20   15.20
 -14   4  -3  -22.90    9.70
 -16  -4  -3  312.97   18.50
  16  -4   3  321.47   20.90
 -16  -4  -3  333.47   24.20
 -16   4  -3  316.37   24.70
  16   4   3  368.16   34.70
  18  -4   3  173.08   16.50
 -18  -4  -3  166.08   19.10
 -18   4  -3  166.18   21.10
  18   4   3  146.19   26.80
 -20  -4  -3  446.76   32.00
  20  -4   3  449.06   26.90
 -20   4  -3  452.95   31.90
  20   4   3  464.95   44.20
 -22  -4  -3   82.49   19.70
  22  -4   3  132.69   17.70
  22   4   3  151.98   32.20
 -22   4  -3   88.79   22.70
 -24  -4  -3  131.99   24.00
 -24   4  -3  140.39   26.00
 -25  -5   3  217.08   26.20
  25   5  -3  225.28   37.20
 -25   5   3  211.78   24.80
 -23  -5   3  233.38   24.70
 -23   5   3  228.28   24.20
  23   5  -3  223.68   34.40
  21  -5  -3   40.20   12.40
 -21  -5   3   51.39   16.60
  21   5  -3   63.09   25.20
 -21   5   3   37.40   16.40
  21   5  -3   59.49   22.20
 -19  -5   3   25.00   13.00
  19  -5  -3   21.80   10.20
  19   5  -3   10.60   12.20
  19   5  -3   29.00   20.70
 -19   5   3   26.10   13.30
 -17  -5   3   15.00   10.70
  17  -5  -3    8.40    8.70
  17   5  -3   42.90   18.90
 -17   5   3   11.20   11.30
  17   5  -3    4.40   10.30
  15  -5  -3   25.30    8.90
 -15  -5   3   19.40    9.60
  15   5  -3   16.30    9.90
 -15   5   3   30.90   10.20
  15   5  -3   34.80   15.80
  13  -5  -3  133.49   10.30
 -13  -5   3  104.89   12.20
  13  -5  -3  109.09   12.60
  13  -5  -3  121.99   12.20
 -13  -5   3  104.39   11.30
  13   5  -3  131.39   17.90
  13   5  -3  127.39   12.80
 -13   5   3  127.19   12.80
 -13   5   3  125.29    9.80
 -11  -5   3   11.70    7.20
 -11  -5   3    2.10    4.60
  11  -5  -3   16.90    5.60
  11  -5  -3   20.00    7.30
  11  -5  -3    6.10    7.10
  11   5  -3    6.40    7.30
 -11   5   3    7.10    6.80
  11   5  -3    1.90   10.00
 -11   5   3    6.10    4.70
  -9  -5   3  167.48   11.00
   9  -5  -3  188.18   13.20
   9  -5  -3  176.68   14.00
  -9  -5   3  182.68   13.20
  -9   5   3  196.38   12.40
   9   5  -3  195.78   17.50
   9   5  -3  203.28   13.30
  -9   5   3  154.88    9.90
  -7  -5   3 1700.83   46.90
   7  -5  -3 1740.03   48.40
  -7  -5   3 1638.74   45.10
   7  -5  -3 1691.33   46.90
  -7   5   3 1633.84   43.70
  -7   5   3 1678.83   44.30
   7   5  -3 1680.63   50.29
   7   5  -3 1630.14   45.50
   5  -5  -3 2487.35   65.59
  -5  -5   3 2499.95   64.49
   5  -5  -3 2511.35   61.09
  -5  -5   3 2544.25   65.59
   5  -5  -3 2600.14   67.69
  -5   5   3 2532.05   63.79
   5   5  -3 2503.25   67.69
   5   5  -3 2555.04   63.99
  -5   5   3 2496.65   62.39
  -3  -5   3 2959.60   74.29
   3  -5  -3 2882.21   76.29
   3  -5  -3 2949.60   70.59
  -3  -5   3 3042.50   74.89
  -3   5   3 2960.50   74.69
  -3   5   3 2945.81   71.79
  -3   5   3 2955.90   74.39
   3   5  -3 2987.90   76.19
   3   5  -3 2952.50   73.29
   1  -5  -3 2116.29   57.39
  -1  -5   3 2058.89   55.39
  -1  -5   3 2223.18   55.89
   1  -5  -3 2179.68   52.49
  -1   5   3 2164.38   56.29
   1   5  -3 2164.38   56.69
  -1   5   3 2156.78   57.89
   1   5  -3 2084.99   54.59
   1   5  -3 2092.79   53.99
   1  -5   3 2533.45   65.29
  -1  -5  -3 2499.75   62.99
   1  -5   3 2630.54   66.19
  -1  -5  -3 2645.34   66.89
   1   5   3 2609.04   70.19
  -1   5  -3 2594.64   65.49
  -1   5  -3 2550.04   64.59
   1   5   3 2585.84   66.79
  -1   5  -3 2626.14   67.89
   3  -5   3   22.50    5.90
  -3  -5  -3   37.40    6.80
   3  -5   3   25.80    6.30
  -3   5  -3   37.80    7.80
  -3   5  -3   28.30    5.30
   3   5   3   19.90    6.50
   3   5   3   25.10    9.00
  -3   5  -3   25.90    5.30
   5  -5   3    1.70    5.60
   5  -5   3    1.20    5.50
  -5  -5  -3    9.90    5.10
  -5  -5  -3    8.80    5.50
   5   5   3   -2.20    7.90
  -5   5  -3   -7.60    5.80
   5   5   3    2.30    5.70
  -5   5  -3    4.90    4.60
   7  -5   3  209.28   13.70
  -7  -5  -3  179.48   12.50
   7  -5   3  177.08   13.30
  -7  -5  -3  191.78   12.60
   7   5   3  197.28   20.20
   7   5   3  239.58   15.00
  -7   5  -3  188.48   11.50
  -7   5  -3  194.28   14.90
  -9  -5  -3   22.10    6.90
   9  -5   3    5.70    7.00
  -9  -5  -3   28.30    7.50
   9   5   3   36.20   13.40
   9   5   3   14.00    8.10
  -9   5  -3    8.00    8.30
  11  -5   3   -1.00    7.90
 -11  -5  -3    2.70    6.70
 -11  -5  -3    8.70    8.10
 -11   5  -3    1.20    9.00
  11   5   3    2.80    9.30
  11   5   3   -3.90   12.70
  13  -5   3   24.60   10.00
 -13  -5  -3   24.70    8.30
 -13  -5  -3   44.00   10.90
  13   5   3   14.50   15.60
 -13   5  -3   19.50   11.50
  15  -5   3  271.37   20.60
 -15  -5  -3  264.97   20.20
 -15  -5  -3  262.07   17.80
  15   5   3  318.07   33.40
 -15   5  -3  300.37   23.50
  17  -5   3  553.14   28.20
 -17  -5  -3  566.14   31.20
 -17   5  -3  522.35   33.40
  17   5   3  598.24   43.80
 -19  -5  -3  504.85   32.30
  19  -5   3  559.24   29.30
  19   5   3  569.84   46.60
 -19   5  -3  453.55   32.80
 -21  -5  -3  383.46   28.60
  21  -5   3  306.07   23.50
 -21   5  -3  327.67   30.00
  21   5   3  389.36   41.70
  23  -5   3  106.09   18.50
 -23  -5  -3  113.79   21.70
  23   5   3  113.89   33.00
 -23   5  -3   92.19   24.10
 -26  -6   3  109.99   24.90
 -26   6   3  120.39   24.20
  26   6  -3   76.89   31.20
 -24  -6   3  126.69   22.90
  24   6  -3  125.19   30.80
 -24   6   3  109.39   22.50
 -22  -6   3  160.98   23.00
  22   6  -3  159.88   30.50
 -22   6   3  134.79   21.10
  20  -6  -3   16.90   11.90
 -20  -6   3   34.90   15.50
  20   6  -3   28.10   14.50
 -20   6   3   58.19   15.90
  20   6  -3    4.90   21.30
  18  -6  -3   21.00   11.30
 -18  -6   3   29.80   13.40
  18   6  -3   21.30   13.30
  18   6  -3   30.30   20.50
 -18   6   3   19.70   13.40
 -16  -6   3   26.30   11.60
  16  -6  -3   15.10   10.00
  16   6  -3   15.30   11.60
  16   6  -3   38.30   19.50
 -16   6   3   19.20   11.90
  14  -6  -3    5.80    9.10
 -14  -6   3   11.80    9.40
  14   6  -3    0.70    9.50
 -14   6   3   13.80    9.80
  14   6  -3    5.30   15.40
  12  -6  -3  -15.30    8.10
  12  -6  -3    0.00    5.60
  12  -6  -3   -5.90    7.60
 -12  -6   3   -1.10    5.70
 -12  -6   3  -10.70    7.60
  12   6  -3   -6.70   12.30
  12   6  -3    0.30    8.40
 -12   6   3    2.10    8.30
 -12   6   3    3.60    5.20
  10  -6  -3   74.59   11.00
  10  -6  -3   56.99   10.40
 -10  -6   3   60.69    9.90
 -10  -6   3   80.99    9.20
  10   6  -3   77.09   10.10
 -10   6   3   65.09    9.40
 -10   6   3   74.69    7.70
  10   6  -3   90.29   15.50
  -8  -6   3  223.28   13.80
   8  -6  -3  214.68   16.10
  -8  -6   3  231.08   15.80
   8  -6  -3  213.78   16.40
  -8   6   3  202.28   11.90
   8   6  -3  224.78   19.80
  -8   6   3  233.68   13.90
   8   6  -3  235.08   15.30
   6  -6  -3  854.11   30.50
   6  -6  -3  841.62   29.00
   6  -6  -3  800.32   24.10
  -6  -6   3  740.93   27.80
  -6  -6   3  791.32   27.50
  -6   6   3  779.42   25.70
   6   6  -3  826.92   33.10
  -6   6   3  820.32   26.00
   6   6  -3  806.52   27.30
   4  -6  -3  955.20   32.70
  -4  -6   3  890.81   30.20
   4  -6  -3  900.61   26.10
  -4  -6   3  942.91   30.40
   4   6  -3  899.81   29.20
  -4   6   3  935.61   30.00
   4   6  -3  884.41   33.50
  -4   6   3  911.71   29.50
  -4   6   3  901.81   27.60
  -2  -6   3  861.31   28.80
   2  -6  -3  826.22   24.60
  -2  -6   3  850.01   28.20
   2  -6  -3  894.91   30.70
   2   6  -3  851.41   31.20
  -2   6   3  851.91   29.70
   2   6  -3  870.01   27.60
   2   6  -3  857.11   27.20
  -2   6   3  844.92   28.60
  -2   6   3  813.92   25.90
   0  -6  -3  659.03   25.30
   0  -6   3  659.03   23.40
   0  -6   3  651.43   24.40
   0  -6  -3  628.84   20.80
   0   6  -3  633.74   22.10
   0   6   3  671.23   24.60
   0   6  -3  666.53   25.80
   0   6   3  642.74   26.70
   0   6  -3  681.33   24.90
   0   6  -3  627.44   22.50
  -2  -6  -3  535.85   19.40
  -2  -6  -3  580.04   22.70
   2  -6   3  569.54   22.40
   2  -6   3  553.24   21.10
  -2   6  -3  516.95   20.10
  -2   6  -3  561.34   23.30
   2   6   3  564.34   22.80
  -2   6  -3  541.65   20.30
   2   6   3  528.85   25.70
  -4  -6  -3   18.90    6.50
   4  -6   3   19.20    7.00
  -4  -6  -3   32.90    7.60
   4  -6   3   21.20    7.50
  -4   6  -3    7.80    7.50
   4   6   3   13.60    9.50
   4   6   3   24.50    7.80
  -4   6  -3   11.40    5.70
  -6  -6  -3    4.80    6.40
  -6  -6  -3    4.10    6.50
   6  -6   3   -1.80    6.40
   6  -6   3   11.50    7.10
   6   6   3    2.70    6.70
   6   6   3   14.50   10.10
  -6   6  -3    7.30    8.00
   8  -6   3   21.00    8.40
  -8  -6  -3   19.20    7.50
  -8  -6  -3    7.70    7.20
   8   6   3   13.90    8.10
  -8   6  -3    4.60    8.70
   8   6   3   -1.70   10.90
 -10  -6  -3   21.40    8.80
 -10  -6  -3   13.60    7.70
  10  -6   3   14.10    8.90
 -10   6  -3    8.70   10.20
  10   6   3   17.30   14.00
  10   6   3   -1.90    8.40
 -12  -6  -3   -8.00    7.90
 -12  -6  -3    1.90    9.30
  12  -6   3  -12.90    9.00
  12   6   3   16.40   15.50
 -12   6  -3   10.30   11.30
 -14  -6  -3   98.09   12.70
 -14  -6  -3  113.99   15.30
  14  -6   3  123.79   14.90
  14   6   3  133.79   25.00
 -14   6  -3  100.49   17.00
  16  -6   3  158.08   18.00
 -16  -6  -3  171.78   18.90
 -16   6  -3  140.99   20.90
  16   6   3  242.18   31.30
 -18  -6  -3  269.87   23.00
  18  -6   3  250.87   21.80
  18   6   3  315.97   36.50
 -18   6  -3  271.37   27.30
  20  -6   3  208.38   20.90
 -20  -6  -3  206.28   23.80
 -20   6  -3  179.78   25.30
  20   6   3  188.78   34.50
 -22  -6  -3   79.39   21.70
  22  -6   3   56.49   17.60
  22   6   3   84.29   29.70
 -22   6  -3   66.19   23.40
 -25  -7   3   -7.30   20.50
 -25   7   3   -8.70   19.10
  25   7  -3   -3.70   25.90
 -23  -7   3   26.90   19.50
 -23   7   3   18.50   19.00
  23   7  -3   33.70   27.60
  21  -7  -3   18.30   14.20
 -21  -7   3   25.40   17.50
  21   7  -3    6.70   21.80
 -21   7   3   30.50   17.20
 -19  -7   3  319.27   25.50
  19  -7  -3  284.77   22.10
  19   7  -3  246.98   32.90
  19   7  -3  312.77   25.20
 -19   7   3  276.57   24.00
  17  -7  -3  128.69   16.40
 -17  -7   3  115.39   16.90
  17   7  -3  104.89   24.50
  17   7  -3  105.39   16.90
 -17   7   3   98.99   16.80
 -15  -7   3  285.37   21.40
  15  -7  -3  253.97   19.80
 -15   7   3  293.07   20.90
  15   7  -3  253.47   21.30
  15   7  -3  235.88   29.50
 -13  -7   3  201.08   17.10
  13  -7  -3  205.88   17.90
 -13   7   3  216.58   17.70
  13   7  -3  242.98   19.30
  13   7  -3  186.28   24.50
  11  -7  -3  329.17   21.20
 -11  -7   3  318.07   21.10
 -11  -7   3  321.87   17.60
 -11   7   3  295.57   14.70
  11   7  -3  295.37   20.50
  11   7  -3  284.17   26.80
 -11   7   3  325.77   19.90
  -9  -7   3  112.49   11.60
   9  -7  -3   78.49   12.30
   9  -7  -3   86.09   13.00
  -9  -7   3  101.29   12.40
   9   7  -3  119.99   18.80
   9   7  -3  117.79   13.30
  -9   7   3  112.79    9.90
  -9   7   3   99.29   11.60
   7  -7  -3  190.88   12.70
   7  -7  -3  226.08   18.20
  -7  -7   3  192.18   15.30
   7  -7  -3  236.88   17.60
  -7  -7   3  202.48   15.70
  -7   7   3  215.58   14.70
   7   7  -3  217.88   21.10
   7   7  -3  218.58   16.30
  -7   7   3  205.78   13.00
  -5  -7   3   59.89    9.90
   5  -7  -3   66.19   11.60
  -5  -7   3   97.29   11.20
   5  -7  -3   93.19    8.60
   5   7  -3   97.89   10.90
  -5   7   3   94.29   10.30
   5   7  -3  105.19   15.80
  -5   7   3   78.99   10.20
  -5   7   3  103.49   10.20
  -3  -7   3   95.29   10.90
   3  -7  -3   84.09   12.10
   3  -7  -3   96.69    8.60
  -3  -7   3   92.19   11.40
   3   7  -3  111.39   14.80
  -3   7   3   89.59   10.70
   3   7  -3  104.89   11.10
  -3   7   3  128.19   12.70
  -3   7   3  130.39   11.10
   1  -7  -3  219.18   12.90
  -1  -7   3  238.88   15.70
  -1  -7   3  212.08   16.00
   1  -7  -3  225.28   17.00
   1   7  -3  224.58   14.40
   1   7  -3  218.18   14.40
   1   7  -3  265.07   17.70
  -1   7   3  230.98   15.90
  -1   7   3  235.08   17.70
   1   7  -3  243.78   17.60
  -1  -7  -3  289.17   18.10
   1  -7   3  231.48   17.10
  -1  -7  -3  277.47   14.50
   1  -7   3  286.37   16.60
  -1   7  -3  276.57   18.40
  -1   7  -3  242.78   15.00
  -1   7  -3  269.37   16.70
   1   7   3  282.27   17.60
  -1   7  -3  240.88   16.80
   1   7   3  270.87   19.40
  -3  -7  -3   55.89    8.50
   3  -7   3   54.89    9.00
   3  -7   3   42.80    9.50
  -3  -7  -3   44.70    9.40
  -3   7  -3   48.20   10.00
  -3   7  -3   44.10    7.70
   3   7   3   39.10    9.60
   3   7   3   44.20   11.80
   5  -7   3  166.58   14.80
  -5  -7  -3  212.88   15.80
  -5  -7  -3  157.18   12.50
   5  -7   3  169.58   13.20
  -5   7  -3  145.69   14.60
   5   7   3  164.48   15.10
   5   7   3  164.08   19.50
  -7  -7  -3  384.46   20.90
  -7  -7  -3  403.06   20.40
   7  -7   3  418.26   21.70
   7  -7   3  416.66   20.50
  -7   7  -3  365.46   23.00
   7   7   3  397.16   22.20
   7   7   3  384.46   27.60
  -9  -7  -3  431.86   22.40
   9  -7   3  461.45   23.90
  -9  -7  -3  443.96   22.30
   9   7   3  433.56   24.40
  -9   7  -3  420.66   25.90
   9   7   3  478.45   31.70
  11  -7   3  459.35   25.30
 -11  -7  -3  430.06   23.70
 -11  -7  -3  389.56   22.30
  11   7   3  430.66   34.80
 -11   7  -3  401.56   27.40
  13  -7   3  131.29   16.30
 -13  -7  -3  168.98   17.00
 -13  -7  -3  142.89   15.10
 -13   7  -3  161.28   19.30
  13   7   3  171.58   26.20
 -15  -7  -3   86.09   16.10
  15  -7   3  109.39   16.60
  15   7   3  133.49   26.10
 -15   7  -3  109.49   19.50
  17  -7   3   -7.90   13.40
 -17  -7  -3   -1.70   14.10
 -17   7  -3    5.00   17.70
  17   7   3   20.30   21.20
  19  -7   3    6.90   14.80
 -19  -7  -3   10.80   16.90
 -19   7  -3   10.20   19.30
  19   7   3   -7.00   21.90
 -21  -7  -3   10.80   18.60
  21  -7   3   -4.20   15.90
 -21   7  -3  -54.09   18.40
  21   7   3   10.20   25.70
 -24  -8   3  -12.00   20.40
 -24   8   3   -7.60   19.70
  24   8  -3    4.40   26.60
 -22  -8   3    9.10   19.10
  22  -8  -3  -32.60   14.50
  22   8  -3    9.80   24.40
 -22   8   3   28.40   18.40
 -20  -8   3   78.09   20.20
  20  -8  -3   88.09   17.30
 -20   8   3   67.09   19.20
  20   8  -3   66.39   25.60
  20   8  -3   39.30   22.80
  18  -8  -3  306.17   24.00
 -18  -8   3  342.77   26.30
  18   8  -3  316.47   27.70
  18   8  -3  292.27   33.20
 -18   8   3  316.07   25.90
 -16  -8   3  304.37   24.20
  16  -8  -3  339.97   25.70
  16   8  -3  255.17   30.60
  16   8  -3  275.87   23.00
 -16   8   3  274.27   23.00
 -14  -8   3  205.28   19.50
  14  -8  -3  227.38   20.50
  14   8  -3  229.88   21.00
 -14   8   3  215.88   19.50
  14   8  -3  232.88   28.30
 -12  -8   3  216.18   18.80
  12  -8  -3  210.68   19.20
  12   8  -3  223.78   19.60
  12   8  -3  188.38   25.10
 -12   8   3  193.78   17.40
 -10  -8   3   26.90   11.30
  10  -8  -3   13.30   10.60
 -10  -8   3   46.10    9.70
  10   8  -3   62.09   13.10
  10   8  -3   33.80   16.50
 -10   8   3   29.00   10.60
   8  -8  -3   47.70    8.90
   8  -8  -3   50.89   12.10
  -8  -8   3   59.69   10.60
  -8  -8   3   45.70   11.40
  -8   8   3   46.20    8.80
  -8   8   3   36.50    9.70
   8   8  -3   56.99   11.80
   8   8  -3   62.39   16.40
   6  -8  -3  120.39   10.80
   6  -8  -3  123.19   14.90
  -6  -8   3  129.39   13.60
  -6  -8   3  132.99   13.80
   6   8  -3   86.79   12.40
  -6   8   3  133.69   13.60
  -6   8   3  121.39   12.50
   6   8  -3  142.29   18.60
  -6   8   3  104.69   11.80
  -4  -8   3  101.59   12.70
   4  -8  -3   82.59    9.40
  -4  -8   3  109.59   12.70
   4  -8  -3   93.79   13.60
  -4   8   3   69.99   10.10
   4   8  -3   71.09   14.70
  -4   8   3  113.69   13.70
   4   8  -3   84.79   11.60
  -4   8   3   78.59   11.50
   2  -8  -3   51.49    8.30
  -2  -8   3   58.89   10.30
   2  -8  -3   44.50   11.30
  -2  -8   3   46.10   10.90
  -2   8   3   40.00    9.10
   2   8  -3   57.59   10.10
  -2   8   3   47.40   10.80
  -2   8   3   55.09   10.90
   2   8  -3   49.60   12.70
   0  -8   3    1.10    8.20
   0  -8  -3   -2.80    6.60
   0  -8   3    5.90    8.00
   0  -8  -3    0.20    8.40
   0   8  -3   -3.80    8.50
   0   8  -3    7.80    9.40
   0   8   3   17.10   10.70
   0   8   3   -1.90    8.20
   0   8  -3   -2.20    7.40
   2  -8   3   10.90    9.10
  -2  -8  -3   31.60    9.70
   2  -8   3   27.80    8.60
  -2  -8  -3    7.50    7.50
   2   8   3   23.00    9.20
  -2   8  -3   17.20   10.00
  -2   8  -3   17.70    8.60
   2   8   3    3.70   10.10
  -2   8  -3   23.30    8.40
  -4  -8  -3   21.40    8.40
   4  -8   3    2.90    9.20
   4  -8   3    3.60    8.30
  -4  -8  -3   20.00    9.70
   4   8   3    8.90    8.90
  -4   8  -3   14.80   10.20
   4   8   3    5.20   11.20
   6  -8   3  261.17   19.70
  -6  -8  -3  279.57   18.80
  -6  -8  -3  286.87   20.40
   6  -8   3  263.47   18.50
   6   8   3  270.17   19.90
   6   8   3  275.87   25.00
  -6   8  -3  229.78   19.30
   8  -8   3  557.94   28.10
  -8  -8  -3  596.24   27.30
   8  -8   3  552.24   25.70
  -8  -8  -3  526.65   24.90
  -8   8  -3  553.84   29.60
   8   8   3  494.45   31.50
   8   8   3  548.05   34.30
  10  -8   3  126.39   16.30
 -10  -8  -3  140.99   15.30
 -10   8  -3  114.59   17.30
  10   8   3  125.39   22.40
 -12  -8  -3  285.37   20.60
  12  -8   3  200.38   20.10
 -12  -8  -3  228.68   19.10
  12   8   3  249.28   29.20
 -12   8  -3  214.88   22.70
 -14  -8  -3   44.30   14.50
  14  -8   3   36.50   15.40
  14   8   3   30.50   19.90
 -14   8  -3   44.40   17.70
  16  -8   3   -3.70   14.40
 -16  -8  -3   16.30   14.90
  16   8   3   29.20   21.80
 -16   8  -3   -1.70   17.30
 -18  -8  -3  -11.90   15.60
  18  -8   3  -13.60   14.20
  18   8   3    1.00   22.10
 -18   8  -3   -0.70   19.30
  20  -8   3   41.00   18.20
 -20  -8  -3   25.10   19.30
  20   8   3   52.59   26.60
 -20   8  -3    6.50   22.10
 -21  -9   3   -5.90   19.30
  21  -9  -3   10.70   16.30
  21   9  -3  -28.60   23.10
 -21   9   3    2.40   18.40
 -19  -9   3   36.00   18.50
  19  -9  -3   35.40   15.90
  19   9  -3   13.20   18.30
  19   9  -3   10.40   22.50
 -19   9   3   46.80   18.10
  17  -9  -3   97.09   18.60
 -17  -9   3  142.79   20.10
  17   9  -3  111.49   26.60
 -17   9   3   84.19   18.20
  17   9  -3   83.89   19.20
 -15  -9   3  151.58   19.70
  15  -9  -3  170.18   19.80
  15   9  -3  141.69   19.80
 -15   9   3  141.89   19.00
  15   9  -3  126.79   26.00
 -13  -9   3  127.49   17.30
  13  -9  -3  124.49   18.10
  13   9  -3  138.99   18.80
 -13   9   3  103.09   16.40
  13   9  -3  136.49   23.70
 -11  -9   3  262.57   20.80
  11  -9  -3  291.67   23.10
  11   9  -3  275.07   22.60
 -11   9   3  242.38   20.00
  11   9  -3  211.68   25.50
   9  -9  -3   11.60   11.60
  -9  -9   3   -9.40   10.60
  -9  -9   3    1.10    9.20
   9   9  -3   14.80   15.70
   9   9  -3   -0.40   11.00
  -9   9   3   13.10   10.30
   7  -9  -3  105.19   11.60
  -7  -9   3  106.19   13.40
   7  -9  -3   93.59   14.90
  -7  -9   3  114.19   14.50
  -7   9   3   87.19   13.70
   7   9  -3   93.49   14.40
  -7   9   3   86.29   12.00
  -7   9   3  102.89   13.40
   7   9  -3   94.19   19.00
   5  -9  -3  106.09   15.30
  -5  -9   3  105.69   14.40
   5  -9  -3   96.59   11.00
  -5  -9   3   76.59   13.10
   5   9  -3  111.29   14.50
  -5   9   3   78.59   12.40
   5   9  -3   99.09   17.80
  -5   9   3  100.99   14.70
  -5   9   3   96.09   12.50
   3  -9  -3   59.69    9.80
  -3  -9   3   59.79   11.60
  -3  -9   3   71.49   12.70
   3  -9  -3   37.20   11.80
  -3   9   3   51.69   10.80
  -3   9   3   45.60   12.40
   3   9  -3   67.49   12.30
   3   9  -3   42.60   14.40
  -3   9   3   52.59   12.20
  -1  -9   3  162.08   15.20
   1  -9  -3  158.68   13.20
  -1  -9   3  140.79   15.90
   1  -9  -3  155.08   17.70
  -1   9   3  168.08   17.30
  -1   9   3  148.49   14.60
   1   9  -3  165.68   18.20
  -1   9   3  205.98   17.70
   1   9  -3  207.38   19.10
   1   9  -3  144.99   14.80
   1  -9   3    5.60    9.40
  -1  -9  -3   22.90   11.30
   1  -9   3   20.70   11.20
  -1  -9  -3   26.80    9.00
  -1   9  -3   30.20   10.70
  -1   9  -3   12.40    9.20
  -1   9  -3    0.60   10.80
   1   9   3   22.90   10.80
   1   9   3   11.80   12.30
   3  -9   3    1.30    9.90
  -3  -9  -3   -4.00   10.20
   3  -9   3    7.10    9.40
  -3  -9  -3   12.70    9.10
   3   9   3   14.20   10.70
  -3   9  -3   -0.20   10.70
   3   9   3    7.70   12.00
  -3   9  -3   -0.30    9.60
  -5  -9  -3   98.39   12.90
  -5  -9  -3  103.29   15.60
   5  -9   3   80.49   12.80
   5  -9   3   96.49   15.10
   5   9   3   97.39   18.50
  -5   9  -3  132.59   17.20
   5   9   3  100.29   14.90
  -7  -9  -3  276.67   19.10
   7  -9   3  257.87   19.00
   7  -9   3  230.98   20.80
  -7  -9  -3  300.37   22.20
  -7   9  -3  292.27   23.70
   7   9   3  278.17   26.50
  -9  -9  -3  130.69   15.40
  -9  -9  -3  124.49   16.20
   9  -9   3  127.59   15.20
   9  -9   3  125.99   17.30
   9   9   3  163.48   23.70
  -9   9  -3  141.99   19.10
  11  -9   3  164.88   19.60
 -11  -9  -3  203.18   18.60
 -11  -9  -3  181.78   18.70
 -11   9  -3  167.28   21.40
  11   9   3  214.28   27.00
  13  -9   3   22.30   14.80
 -13  -9  -3    4.40   13.60
 -13  -9  -3   19.70   14.20
  13   9   3   14.90   19.50
 -13   9  -3  -31.00   15.00
 -15  -9  -3   31.20   16.20
  15  -9   3   19.70   15.90
  15   9   3   32.70   22.00
 -15   9  -3   42.10   19.90
  17  -9   3   73.19   18.90
 -17  -9  -3   41.40   19.10
 -17   9  -3   65.59   22.60
 -19  -9  -3   21.70   20.20
  19  -9   3   22.50   17.80
 -19   9  -3   42.40   23.10
  19   9   3   72.49   27.50
 -20 -10   3  -15.60   18.60
  20 -10  -3   11.90   17.20
  20  10  -3  -15.00   23.40
 -18 -10   3    5.20   18.20
  18 -10  -3    8.20   15.60
  18  10  -3  -17.50   21.60
  18  10  -3   -5.80   17.80
  16 -10  -3   11.80   15.20
 -16 -10   3    0.40   16.40
  16  10  -3   -1.50   20.40
 -16  10   3   -5.40   17.50
  16  10  -3   -7.30   16.80
 -14 -10   3   19.00   15.70
  14 -10  -3   42.00   16.40
  14  10  -3    2.70   16.30
 -14  10   3   22.70   14.70
  14  10  -3  -12.20   18.20
  12 -10  -3   10.60   14.00
 -12 -10   3   -1.60   13.90
 -12  10   3    1.50   12.70
  12  10  -3   13.50   18.00
  12  10  -3   -3.50   13.60
  10 -10  -3   14.00   12.90
 -10 -10   3    7.40   13.10
  10  10  -3   -4.60   13.50
 -10  10   3   -4.90   10.80
  10  10  -3    3.10   16.30
   8 -10  -3   -1.80    9.70
  -8 -10   3   -7.00   11.70
  -8 -10   3    7.70   10.10
   8 -10  -3   -0.90   12.10
   8  10  -3   -8.90   12.10
   8  10  -3  -26.60   14.80
  -8  10   3   -6.70   11.70
  -8  10   3   11.00   11.20
  -6 -10   3   53.69   14.20
   6 -10  -3   65.39   14.90
  -6 -10   3   79.49   13.90
   6 -10  -3   67.59   11.60
  -6  10   3   52.39   14.00
  -6  10   3   73.39   13.50
  -6  10   3   56.09   12.60
   6  10  -3   57.19   18.50
   6  10  -3   96.89   15.50
   4 -10  -3   33.00   10.20
  -4 -10   3   29.90   12.40
  -4 -10   3   39.70   12.30
   4 -10  -3   48.30   13.80
   4  10  -3   23.70   12.10
   4  10  -3   16.20   15.40
  -4  10   3   34.00   11.10
  -4  10   3   50.69   14.10
  -4  10   3   24.00   11.60
   2 -10  -3   27.00   13.40
  -2 -10   3   -3.90   10.60
   2 -10  -3   17.60    9.70
  -2 -10   3   -0.10   10.90
   2  10  -3   34.30   14.20
  -2  10   3   12.00   10.30
   2  10  -3   28.00   14.40
  -2  10   3   12.10   11.90
  -2  10   3   19.50   12.70
   2  10  -3   18.20   12.10
   0 -10   3   14.40   10.90
   0 -10  -3   36.30   10.70
   0 -10  -3   31.70   12.90
   0 -10   3   38.40   11.70
   0  10   3   40.00   13.90
   0  10  -3   11.20   13.60
   0  10  -3   44.30   13.00
   0  10   3   15.30   11.00
   0  10   3   26.40   12.90
   2 -10   3  -11.80   10.90
  -2 -10  -3  -10.10    9.70
  -2 -10  -3   -5.50   11.90
   2 -10   3  -10.90   10.10
   2  10   3   -8.90   11.50
  -2  10  -3   13.70   11.20
   2  10   3    1.20   12.90
  -2  10  -3   -7.30   12.60
  -4 -10  -3  -19.30   11.10
  -4 -10  -3   32.90   11.50
   4 -10   3    3.00   10.40
   4 -10   3    1.00   12.10
  -4  10  -3   15.70   13.60
  -4  10  -3    9.60   11.90
   4  10   3    7.00   14.40
   4  10   3   30.10   15.30
   6 -10   3  -16.90   11.50
  -6 -10  -3   -6.90   11.50
  -6 -10  -3  -11.10   10.80
   6 -10   3    6.80   11.10
  -6  10  -3  -14.50   13.50
   6  10   3    8.60   15.40
   8 -10   3   22.10   13.50
  -8 -10  -3   32.20   13.40
  -8 -10  -3   28.80   13.70
   8 -10   3    7.10   11.60
   8  10   3    9.70   16.00
  -8  10  -3   35.20   15.80
 -10 -10  -3  -18.50   11.90
  10 -10   3   11.80   14.00
 -10 -10  -3   10.20   13.10
  10  10   3   18.60   17.60
 -10  10  -3   -8.00   15.50
  12 -10   3   52.29   17.30
 -12 -10  -3   64.69   16.50
 -12 -10  -3   49.30   16.00
 -12  10  -3   60.79   19.60
  12  10   3   69.29   22.60
  14 -10   3   24.10   16.70
 -14 -10  -3    8.20   15.60
 -14  10  -3    5.00   18.70
  14  10   3    6.20   19.90
  16 -10   3   28.60   17.90
 -16 -10  -3   16.10   17.70
  16  10   3    4.60   22.10
 -16  10  -3    4.50   20.90
  18 -10   3   20.40   18.60
 -18  10  -3   16.30   23.00
 -19 -11   3   53.49   22.60
  19 -11  -3   81.09   21.00
  19  11  -3   52.09   27.20
  17 -11  -3   80.59   19.70
 -17 -11   3   70.99   20.70
  17  11  -3  100.69   27.70
  17  11  -3   66.39   22.20
  15 -11  -3   48.60   17.60
 -15 -11   3   61.99   19.10
  15  11  -3   42.90   22.80
  15  11  -3   25.20   18.70
  13 -11  -3   67.09   18.10
  13  11  -3   56.19   18.10
  13  11  -3    7.30   21.50
 -11 -11   3   47.60   16.60
  11 -11  -3   21.10   15.30
  11  11  -3   31.50   20.60
  11  11  -3   32.90   16.80
   9 -11  -3   92.29   17.50
  -9 -11   3   72.79   16.60
   9  11  -3    4.50   18.70
   9  11  -3   38.30   15.50
  -7 -11   3   47.50   13.80
   7 -11  -3   31.20   15.60
  -7 -11   3   64.39   16.20
   7  11  -3   49.99   16.10
  -7  11   3   25.90   17.80
   7  11  -3   39.70   18.40
   5 -11  -3  120.89   19.20
  -5 -11   3  180.78   19.20
  -5 -11   3  160.68   18.40
   5  11  -3  121.59   17.90
  -5  11   3  174.98   19.90
   5  11  -3  115.59   20.60
  -3 -11   3   12.10   12.90
   3 -11  -3  -19.80   11.90
  -3 -11   3    5.40   11.30
  -3  11   3   22.90   14.30
  -3  11   3   21.30   12.30
   3  11  -3  -10.10   14.20
   3  11  -3   14.00   13.90
   3  11  -3    1.80   14.70
   1 -11  -3   67.39   16.10
  -1 -11   3  135.99   16.80
  -1 -11   3  116.99   16.60
   1  11  -3  132.09   18.60
  -1  11   3  119.89   18.80
  -1  11   3  105.19   18.00
   1  11  -3  119.09   19.50
  -1 -11  -3   -7.60   13.20
   1 -11   3   12.20   12.80
   1 -11   3   13.60   11.90
   1  11   3   17.30   14.40
  -1  11  -3   10.60   14.60
  -1  11  -3   -2.80   12.30
   3 -11   3   12.40   12.80
   3 -11   3    6.70   11.50
  -3 -11  -3   15.20   13.80
  -3  11  -3   19.30   13.10
   3  11   3    1.30   14.20
  -3  11  -3   -8.80   14.30
  -5 -11  -3   24.60   14.60
   5 -11   3   26.30   12.20
  -5 -11  -3   58.89   21.10
   5 -11   3    7.90   13.70
   5  11   3   25.70   17.50
  -5  11  -3   24.30   15.60
  -5  11  -3   35.30   14.30
  -7 -11  -3  160.08   19.70
   7 -11   3  186.98   19.20
   7 -11   3  182.68   21.50
  -7 -11  -3  188.78   27.80
   7  11   3  161.58   25.30
  -7  11  -3  180.18   23.50
  -7  11  -3  208.98   20.80
  -9 -11  -3   35.50   15.70
  -9 -11  -3   18.00   23.40
   9 -11   3   53.19   16.60
   9 -11   3   11.40   13.70
  -9  11  -3   18.30   16.90
   9  11   3    9.80   18.70
  11 -11   3  227.58   25.00
 -11 -11  -3  225.58   23.00
  11  11   3  259.57   32.00
 -11  11  -3  216.48   25.70
  13 -11   3   27.20   17.90
  13  11   3   38.00   21.60
 -13  11  -3   59.39   22.20
  15 -11   3   14.90   18.30
  15  11   3   30.50   23.40
 -15  11  -3   -6.00   20.00
 -16 -12   3  120.39   23.80
  16 -12  -3  151.18   23.70
  16  12  -3  109.89   28.90
  16  12  -3   83.79   23.70
 -14 -12   3   61.69   20.00
  14 -12  -3   68.39   19.50
  14  12  -3   53.69   20.50
  14  12  -3   97.79   28.10
  12 -12  -3   85.19   19.40
 -12 -12   3   75.89   19.60
  12  12  -3   34.70   18.40
  12  12  -3   73.29   23.70
  10 -12  -3   36.60   17.10
 -10 -12   3   25.00   16.70
  10  12  -3  -16.30   18.30
  10  12  -3   28.60   19.60
  -8 -12   3   -3.90   19.20
  -8 -12   3  -13.40   14.40
   8 -12  -3    8.00   15.00
   8  12  -3    9.50   15.90
   8  12  -3   23.40   19.70
   6 -12  -3   23.70   15.80
  -6 -12   3   13.60   13.20
  -6 -12   3   10.60   14.30
   6  12  -3   14.60   17.80
   6  12  -3   12.00   15.80
  -4 -12   3   58.89   15.70
   4 -12  -3   32.80   15.80
  -4 -12   3   31.40   14.10
   4  12  -3   23.10   17.00
   4  12  -3   11.50   15.40
   4  12  -3   52.89   18.10
   2 -12  -3    2.90   14.00
  -2 -12   3   16.70   13.60
  -2 -12   3   23.30   13.00
   2  12  -3   19.70   15.60
   2  12  -3    9.20   16.70
  -2  12   3    6.50   14.10
   0 -12   3   -1.10   13.00
   0 -12   3   23.80   13.90
   0 -12  -3   -2.00   13.70
   0  12  -3   -0.60   16.20
   0  12   3   -3.80   14.40
   0  12  -3   15.30   15.60
   2 -12   3   30.80   14.60
   2 -12   3   -1.40   12.90
  -2 -12  -3  -13.80   13.70
   2  12   3   -1.10   15.40
  -2  12  -3   15.90   15.60
  -2  12  -3    8.40   16.30
  -4 -12  -3   95.29   19.30
   4 -12   3   49.90   15.10
   4 -12   3  111.19   19.10
  -4  12  -3  103.39   19.30
  -4  12  -3  117.09   22.30
   4  12   3  100.09   21.50
   6 -12   3   42.80   14.80
  -6 -12  -3   66.69   18.10
   6 -12   3   77.59   18.40
  -6  12  -3   66.09   17.70
   6  12   3   56.99   20.00
  -6  12  -3   94.39   21.60
   8 -12   3  120.99   20.90
  -8 -12  -3   86.29   19.00
   8 -12   3   93.09   17.60
  -8  12  -3  139.19   23.70
  -8  12  -3  118.29   20.30
   8  12   3  114.89   24.40
 -10 -12  -3  147.69   21.90
  10 -12   3  144.49   22.70
 -10  12  -3  136.79   24.30
  10  12   3  153.08   26.80
  12 -12   3   72.79   20.50
 -12  12  -3  132.09   25.90
  12  12   3  122.49   26.60
 -13 -13   3    4.70   18.50
  13 -13  -3   26.00   19.00
  13  13  -3   12.50   22.70
  13  13  -3   25.20   20.90
  11 -13  -3   21.60   17.80
 -11 -13   3   36.40   19.10
  11  13  -3   12.80   19.90
  11  13  -3    8.20   21.20
   9 -13  -3   10.70   17.70
  -9 -13   3   54.39   19.10
   9  13  -3   43.20   21.80
   9  13  -3   31.30   19.70
  -7 -13   3   38.90   20.10
   7 -13  -3    2.40   15.70
  -7 -13   3   15.50   16.80
   7  13  -3  -11.10   18.90
   7  13  -3   40.90   19.50
  -5 -13   3    5.00   16.70
   5 -13  -3   17.00   16.70
  -5 -13   3   43.10   15.00
   5  13  -3   37.50   18.20
   5  13  -3   31.70   18.60
   3 -13  -3   14.70   15.80
  -3 -13   3   58.99   15.70
  -3 -13   3   55.29   17.40
   3  13  -3   27.00   18.50
   3  13  -3   17.70   17.60
  -1 -13   3   16.20   14.30
   1 -13  -3   25.80   16.30
  -1 -13   3  -29.70   13.50
   1  13  -3   37.60   19.30
   1  13  -3   31.80   18.40
   1 -13   3   11.90   15.10
   1 -13   3   48.50   16.80
  -1 -13  -3   11.40   15.70
   1  13   3   15.40   17.10
  -1  13  -3   30.10   18.70
  -1  13  -3   84.79   20.80
  -3 -13  -3    1.80   15.90
   3 -13   3   37.20   16.20
   3 -13   3   13.00   15.00
  -3  13  -3    3.80   18.50
  -3  13  -3   27.90   18.30
   3  13   3    4.50   18.70
  -5 -13  -3  -26.70   14.90
   5 -13   3    3.10   15.70
   5 -13   3    6.50   14.60
  -5  13  -3   41.60   19.30
   5  13   3   -6.80   17.70
  -5  13  -3   18.00   20.30
  -7 -13  -3   45.60   18.80
   7 -13   3   60.39   19.90
   7 -13   3   32.00   16.50
  -7  13  -3   45.60   22.40
   7  13   3   52.29   21.20
  -7  13  -3   14.80   19.20
   9 -13   3   23.30   18.20
   9 -13   3    0.60   17.10
  -9 -13  -3   12.10   17.70
  -9  13  -3   15.70   18.50
   9  13   3   30.30   21.10
  -9  13  -3   15.20   20.80
  -8 -14   3   35.00   19.30
   8 -14  -3   37.30   19.60
   8  14  -3   49.99   21.40
   8  14  -3   28.40   25.90
  -6 -14   3   87.59   21.40
   6 -14  -3   85.89   20.40
   6  14  -3   80.99   22.70
   6  14  -3   83.99   21.90
  -4 -14   3  161.68   22.70
   4 -14  -3  122.49   21.80
  -4 -14   3  170.98   21.00
   4  14  -3  146.79   25.70
   4  14  -3  168.28   24.90
   2 -14  -3   93.89   20.30
  -2 -14   3   18.80   16.80
  -2 -14   3   70.99   17.30
   2  14  -3   49.70   21.00
   2  14  -3   11.60   20.90
   0 -14   3   46.50   17.90
   0 -14   3   68.49   18.30
   0 -14  -3   84.19   20.60
   0  14  -3   35.80   21.60
   0  14  -3   51.39   20.80
   2 -14   3   13.30   16.20
  -2 -14  -3   29.50   18.20
   2 -14   3   35.00   17.40
  -2  14  -3   34.00   20.10
  -2  14  -3   25.60   21.20
   2  14   3   23.70   18.80
   4 -14   3   31.90   18.50
   4 -14   3   17.30   16.20
  -4 -14  -3   21.50   17.60
   4  14   3   11.10   18.20
  -4  14  -3  -13.30   19.80
  -4  14  -3    9.30   19.40
   6 -14   3   -9.30   15.90
  -6 -14  -3   -0.60   17.90
   6 -14   3   46.70   19.50
   6  14   3   32.50   22.10
  -6  14  -3   22.80   21.10
  -6  14  -3   -7.00   20.90
 -28   0   4  -21.10   18.70
 -26   0   4    4.60   16.70
  24   0  -4  294.67   32.00
 -24   0   4  257.77   23.40
 -22   0   4   98.19   15.70
  22   0  -4  100.09   20.30
  20   0  -4  551.44   32.40
 -20   0   4  609.64   28.20
  20   0  -4  545.85   28.40
  18   0  -4  288.07   20.50
  18   0  -4  299.17   22.70
 -18   0   4  257.67   18.60
 -16   0   4    6.80    7.50
  16   0  -4    9.90    4.20
  16   0  -4   12.40    8.80
  16   0  -4    7.70    9.10
 -14   0   4  158.18   11.80
  14   0  -4  162.88   12.30
  14   0  -4  149.59   13.20
  14   0  -4  143.29    7.10
 -12   0   4   52.19    6.90
 -12   0   4   54.59    7.80
  12   0  -4   41.10    7.40
  12   0  -4   37.40    6.70
  12   0  -4   43.30    3.70
 -10   0   4 1086.89   30.30
 -10   0   4 1057.19   31.40
  10   0  -4 1069.09   26.10
  10   0  -4 1100.19   31.30
  10   0  -4 1119.39   30.40
   8   0  -4   -1.80    3.50
   8   0  -4    6.70    3.90
  -8   0   4    7.40    3.20
   8   0  -4    4.10    2.30
  -8   0   4    4.80    3.40
  -6   0   4 1186.68   30.60
   6   0  -4 1157.38   30.30
   6   0  -4 1162.58   29.10
   6   0  -4 1124.89   28.10
  -6   0   4 1137.49   29.40
   4   0  -4  415.96   11.50
  -4   0   4  394.06   12.20
   4   0  -4  419.56   13.00
   4   0  -4  409.96   11.40
  -4   0   4  408.56   13.20
  -2   0   4   16.20    2.80
   2   0  -4   23.70    3.20
  -2   0   4   20.50    3.40
  -2   0   4   21.50    2.70
   0   0  -4 3050.29   73.19
   0   0   4 3117.69   73.29
   0   0   4 3151.28   72.29
   0   0  -4 3165.98   72.99
   0   0   4 3172.68   73.89
   0   0  -4 3061.19   71.89
  -2   0  -4 1360.56   35.30
   2   0   4 1365.76   35.20
  -2   0  -4 1421.26   34.10
   2   0   4 1415.36   35.70
  -2   0  -4 1405.26   35.10
  -4   0  -4 4662.43  109.99
  -4   0  -4 4754.42  109.09
   4   0   4 4657.33  110.69
  -4   0  -4 4685.33  109.99
   4   0   4 4664.13  109.79
   6   0   4 5276.37  123.89
  -6   0  -4 5256.67  124.49
   6   0   4 5213.68  125.79
  -6   0  -4 5271.17  123.29
  -6   0  -4 5324.57  124.09
   8   0   4   10.20    4.90
   8   0   4   16.40    5.20
   8   0   4   17.10    6.50
  -8   0  -4   11.70    5.30
  -8   0  -4    8.10    5.80
 -10   0  -4    5.10    6.40
 -10   0  -4    3.40    5.50
  10   0   4    3.90    5.50
  10   0   4   -0.90    6.70
  10   0   4    2.50    5.80
  12   0   4  552.94   21.00
  12   0   4  549.05   26.40
 -12   0  -4  485.75   22.30
 -12   0  -4  521.45   20.70
 -14   0  -4  715.93   26.60
  14   0   4  764.12   26.90
 -14   0  -4  736.23   29.60
  14   0   4  755.22   33.70
 -16   0  -4  218.08   16.00
  16   0   4  210.68   15.80
 -16   0  -4  218.68   18.60
  18   0   4   45.30   11.30
 -18   0  -4   34.60   10.50
 -18   0  -4   51.79   14.50
 -20   0  -4   16.00   14.60
  20   0   4   14.40   10.90
 -20   0  -4   -5.40    9.80
 -22   0  -4  -30.00   15.40
 -24   0  -4   -9.30   19.00
 -27  -1   4   -6.70   17.80
 -27   1   4   19.80   18.20
 -25  -1   4    2.60   15.50
 -25   1   4   34.20   16.50
  25   1  -4   -0.60   20.30
 -23  -1   4   70.89   16.30
 -23   1   4  108.39   17.30
  23   1  -4   53.09   21.10
 -21  -1   4   57.09   13.80
  21  -1  -4   32.50   15.20
 -21   1   4   51.09   13.30
  21   1  -4   41.60   16.70
  21   1  -4   45.90   13.60
  19  -1  -4  141.79   16.90
 -19  -1   4  107.69   13.80
  19  -1  -4   96.89   13.30
 -19   1   4  100.89   13.40
  19   1  -4  136.79   19.20
  19   1  -4  114.99   15.00
  17  -1  -4   49.30   11.30
  17  -1  -4   52.19    6.20
 -17  -1   4   49.60   10.00
  17  -1  -4   43.70    9.80
  17   1  -4   49.60   12.70
 -17   1   4   35.40    9.50
  17   1  -4   36.60   10.40
 -15  -1   4   28.10    7.50
  15  -1  -4   27.10    8.40
  15  -1  -4   38.20    8.70
  15  -1  -4   29.40    5.00
  15   1  -4   30.90    9.10
  15   1  -4   26.00    9.50
 -15   1   4   26.00    7.80
  13  -1  -4   10.40    3.80
  13  -1  -4   -0.40    6.00
 -13  -1   4    9.20    5.90
  13  -1  -4    4.20    5.70
  13   1  -4    3.20    6.90
 -13   1   4   13.90    5.90
 -13   1   4    1.30    5.30
  13   1  -4   -1.80    5.80
  11  -1  -4  256.97   12.60
  11  -1  -4  235.88    9.40
 -11  -1   4  241.28   12.50
  11  -1  -4  235.88   12.50
 -11   1   4  254.37   12.50
  11   1  -4  248.08   12.60
  11   1  -4  236.98   13.90
 -11   1   4  251.87   12.00
   9  -1  -4  684.73   20.50
  -9  -1   4  654.63   21.80
  -9  -1   4  642.14   20.40
   9  -1  -4  642.14   18.70
   9  -1  -4  647.44   20.40
   9   1  -4  659.93   21.60
  -9   1   4  655.83   20.70
  -9   1   4  665.43   19.90
   9   1  -4  691.13   20.20
   7  -1  -4 1919.11   47.80
   7  -1  -4 1930.11   48.10
   7  -1  -4 1954.10   48.00
  -7  -1   4 1934.61   49.30
  -7  -1   4 1940.31   48.50
  -7   1   4 1939.81   47.00
  -7   1   4 1914.01   48.50
   7   1  -4 1967.50   49.10
   7   1  -4 1974.10   47.30
  -5  -1   4 4126.09   92.99
   5  -1  -4 4061.79   95.19
  -5  -1   4 4127.19   96.39
   5  -1  -4 4069.89   95.19
  -5  -1   4 4060.09   96.09
   5   1  -4 4111.49   93.99
   5   1  -4 4055.89   95.89
  -5   1   4 4153.58   96.19
   5   1  -4 4053.49   92.99
  -5   1   4 4051.79   93.89
  -3  -1   4  472.55   14.10
   3  -1  -4  458.45   13.50
  -3  -1   4  474.05   12.60
   3  -1  -4  459.45   13.80
  -3  -1   4  463.35   14.20
   3   1  -4  452.55   12.80
   3   1  -4  456.95   13.80
  -3   1   4  477.75   14.80
  -1  -1   4  414.16   12.30
   1  -1  -4  412.86   12.50
   1  -1  -4  390.06   12.10
  -1  -1   4  412.86   12.00
  -1  -1   4  375.66   12.20
   1  -1  -4  400.46   10.60
   1   1  -4  404.16   13.40
  -1   1   4  412.46   13.50
   1  -1   4 1209.68   30.30
  -1  -1  -4 1174.08   30.20
   1  -1   4 1220.98   30.20
  -1  -1  -4 1155.38   30.30
  -1  -1  -4 1160.88   29.10
   1  -1   4 1179.18   29.60
  -1   1  -4 1198.28   31.30
   1   1   4 1164.28   31.80
   1   1   4 1198.78   30.70
  -1   1  -4 1188.98   28.30
  -3  -1  -4  625.24   17.80
  -3  -1  -4  633.64   18.20
   3  -1   4  617.34   17.40
  -3  -1  -4  614.24   18.40
   3  -1   4  651.03   18.50
  -3   1  -4  656.03   19.30
   3   1   4  516.45   17.40
   3   1   4  641.64   20.50
  -3   1  -4  621.14   17.00
   3   1   4  657.83   18.80
   5  -1   4  563.54   17.90
  -5  -1  -4  566.54   17.80
  -5  -1  -4  551.44   17.80
  -5  -1  -4  549.15   17.70
   5  -1   4  564.64   17.00
  -5   1  -4  585.34   17.00
   5   1   4  555.44   20.80
   5   1   4  549.15   17.90
  -5   1  -4  545.15   18.60
   7  -1   4   10.40    4.90
  -7  -1  -4   10.30    4.60
   7  -1   4   17.50    4.70
   7  -1   4   12.90    4.20
  -7  -1  -4   19.80    5.20
  -7   1  -4   16.20    5.80
   7   1   4   15.90    5.20
   7   1   4    0.70    6.00
  -7   1  -4    9.90    4.30
   7   1   4   11.80    4.80
  -9  -1  -4  225.58   13.60
  -9  -1  -4  234.28   12.50
   9  -1   4  238.08   12.80
   9  -1   4  235.58   13.10
   9   1   4  238.28   12.70
  -9   1  -4  251.37   13.30
   9   1   4  253.97   13.50
   9   1   4  231.08   17.60
  -9   1  -4  241.08   14.30
 -11  -1  -4  244.48   15.80
  11  -1   4  253.37   14.60
  11  -1   4  260.47   15.60
 -11  -1  -4  243.68   13.70
 -11   1  -4  231.38   16.00
  11   1   4  293.57   21.20
 -11   1  -4  244.28   14.70
  11   1   4  242.48   14.00
 -13  -1  -4  376.46   17.70
 -13  -1  -4  349.37   19.60
  13  -1   4  338.57   19.70
  13  -1   4  355.56   18.00
  13   1   4  377.86   17.90
  13   1   4  325.47   25.70
 -13   1  -4  349.27   20.60
 -13   1  -4  376.76   18.60
 -15  -1  -4  162.48   15.80
  15  -1   4  219.18   15.80
 -15  -1  -4  203.98   15.40
 -15   1  -4  229.98   18.50
 -15   1  -4  234.58   16.90
  15   1   4  211.88   15.30
  15   1   4  228.68   23.60
  17  -1   4    0.50    9.50
 -17  -1  -4    7.90    8.90
 -17  -1  -4   10.40   11.20
 -17   1  -4   25.00   12.70
 -17   1  -4   11.40    9.30
  17   1   4    8.80    9.10
  17   1   4   -8.50   12.70
 -19  -1  -4    3.20    9.50
 -19  -1  -4    2.30   13.10
  19  -1   4   13.60   10.80
 -19   1  -4   11.30   10.40
  19   1   4  -11.30    9.30
 -19   1  -4   -4.70   13.60
 -21  -1  -4   15.40   16.00
  21  -1   4   -2.70   10.90
 -21   1  -4   -3.50   16.10
 -23  -1  -4   14.10   17.50
 -23   1  -4   18.70   19.80
 -28  -2   4   -1.30   19.70
 -28   2   4   44.80   19.70
 -26  -2   4   38.20   19.20
  26   2  -4   -2.50   24.30
 -26   2   4    3.90   16.40
 -24  -2   4   45.00   17.10
  24   2  -4   20.30   22.20
 -24   2   4   33.30   15.50
 -22  -2   4    7.50   13.40
  22   2  -4  -12.40   16.30
  22   2  -4   -8.60   13.00
 -22   2   4    9.60   13.40
  20  -2  -4  100.69   15.90
 -20  -2   4  110.79   15.00
  20   2  -4   72.29   14.50
 -20   2   4  102.79   14.80
  20   2  -4   76.69   18.50
 -18  -2   4   66.79   11.90
  18  -2  -4   68.69    8.10
  18  -2  -4   60.59   12.50
  18  -2  -4   45.40   11.40
  18   2  -4   46.20   14.50
  18   2  -4   54.39   12.40
 -18   2   4   64.59   11.60
  16  -2  -4   33.20   10.20
  16  -2  -4   37.30    9.30
  16  -2  -4   25.60    6.10
 -16  -2   4   23.00    8.70
 -16   2   4   29.50    8.70
  16   2  -4   53.79   12.70
  16   2  -4   33.60    9.80
  14  -2  -4   26.30    7.90
  14  -2  -4   15.20    6.90
  14  -2  -4   26.30    5.40
 -14  -2   4   26.60    7.50
 -14   2   4   21.10    6.70
 -14   2   4   23.90    7.20
  14   2  -4   25.10    9.50
  14   2  -4   17.90    7.40
  12  -2  -4    6.00    4.50
  12  -2  -4    3.10    5.20
  12  -2  -4    0.40    6.50
 -12  -2   4    1.20    5.50
  12   2  -4    3.10    6.80
  12   2  -4   -3.70    5.20
 -12   2   4    9.50    5.30
 -12   2   4    3.20    4.40
  10  -2  -4  195.88   10.30
  10  -2  -4  218.88   12.20
 -10  -2   4  213.98   11.80
  10  -2  -4  224.68   11.00
 -10   2   4  218.58   10.90
  10   2  -4  236.78   13.60
 -10   2   4  221.18   10.70
  10   2  -4  207.58   11.40
   8  -2  -4  497.95   17.00
   8  -2  -4  512.05   17.20
   8  -2  -4  494.55   16.10
  -8  -2   4  505.15   17.40
  -8   2   4  476.25   16.40
   8   2  -4  510.25   18.40
  -8   2   4  484.15   15.40
   8   2  -4  504.55   16.00
  -6  -2   4 1002.30   27.70
  -6  -2   4  960.00   22.90
  -6  -2   4  918.51   27.20
   6  -2  -4  925.11   27.40
   6  -2  -4  954.90   26.70
   6   2  -4  965.60   27.20
  -6   2   4  975.40   26.70
   6   2  -4  965.20   25.00
  -6   2   4  987.70   24.40
  -4  -2   4 2748.82   66.39
  -4  -2   4 2739.33   66.89
  -4  -2   4 2721.53   63.59
   4  -2  -4 2701.03   66.49
   4  -2  -4 2690.53   66.39
   4   2  -4 2751.82   66.09
   4   2  -4 2804.02   63.79
  -4   2   4 2804.22   66.79
  -2  -2   4  247.48    9.10
  -2  -2   4  238.88    8.30
   2  -2  -4  250.37    9.90
  -2  -2   4  234.28    9.90
  -2   2   4  241.48   10.70
   2   2  -4  232.68    8.90
   0  -2  -4    4.60    3.20
   0  -2   4    8.50    2.50
   0  -2  -4    6.00    1.80
   0  -2  -4    4.90    3.30
   0  -2   4    7.70    2.80
   0  -2   4    7.30    3.20
   0   2   4    5.40    3.80
   0   2  -4    8.50    4.10
   0   2  -4    5.20    2.40
   0   2   4    2.80    1.20
  -2  -2  -4  150.28    6.70
  -2  -2  -4  167.78    9.70
   2  -2   4  163.88    8.30
   2  -2   4  155.98    7.80
  -2  -2  -4  153.88    8.10
   2  -2   4  157.88    6.20
  -2   2  -4  152.58    6.30
  -2   2  -4  158.08    9.60
   2   2   4  169.28   10.60
  -4  -2  -4  106.59    7.70
   4  -2   4  114.89    7.70
   4  -2   4  102.09    5.20
  -4  -2  -4  106.49    6.80
   4   2   4  100.09    7.70
   4   2   4   99.79   10.30
  -4   2  -4  101.79    6.10
   4   2   4  109.19    8.00
  -4   2  -4   95.99    8.20
   6  -2   4   51.49    6.20
  -6  -2  -4   56.69    6.10
  -6  -2  -4   46.00    6.30
   6  -2   4   45.40    4.30
  -6   2  -4   47.00    5.40
   6   2   4   54.09    9.50
  -6   2  -4   51.79    7.30
   6   2   4   57.59    6.60
   6   2   4   46.70    6.20
   8  -2   4   -3.50    4.80
   8  -2   4    2.70    5.00
  -8  -2  -4   10.20    5.40
   8  -2   4    5.40    3.70
  -8  -2  -4    5.40    5.20
   8   2   4    8.00    5.30
   8   2   4    6.60    8.10
  -8   2  -4    4.70    4.40
   8   2   4    2.50    5.50
  -8   2  -4    8.50    6.10
  10  -2   4   13.90    4.90
  10  -2   4   17.60    6.40
 -10  -2  -4   21.90    6.40
 -10  -2  -4   12.50    6.60
  10   2   4   18.80    7.60
 -10   2  -4   23.60    7.70
  10   2   4   23.50   11.10
  10   2   4   14.00    6.30
 -12  -2  -4    4.60    7.20
  12  -2   4    6.20    7.10
 -12  -2  -4    9.70    6.60
  12   2   4   -0.60   10.70
  12   2   4   15.20    7.20
 -12   2  -4    5.30    8.90
 -14  -2  -4   18.60    7.80
  14  -2   4   21.10    8.90
 -14  -2  -4   -0.20    8.50
  14   2   4   -8.20   11.90
 -14   2  -4   29.20   10.80
  14   2   4    2.40    7.70
 -16  -2  -4  184.08   17.10
 -16  -2  -4  127.99   12.80
  16  -2   4  120.49   13.40
 -16   2  -4  156.48   17.70
 -16   2  -4  101.29   13.40
  16   2   4  133.69   13.20
  16   2   4  113.69   21.60
 -18  -2  -4   22.20   13.00
 -18  -2  -4   22.50    9.80
  18  -2   4   38.50   11.80
 -18   2  -4   21.20   14.20
 -18   2  -4   19.50   10.40
  18   2   4   17.20   10.20
  18   2   4   15.70   17.40
 -20  -2  -4    4.80   13.90
  20  -2   4   11.20   11.90
 -20   2  -4   -2.20   11.00
 -20   2  -4   17.90   16.20
 -22  -2  -4    3.80   16.50
 -22   2  -4  -24.70   17.20
 -24  -2  -4   -8.80   19.20
 -24   2  -4   -8.60   19.80
 -27  -3   4  -31.10   17.90
 -27   3   4  -10.20   17.20
  27   3  -4    2.00   25.50
 -25  -3   4   23.50   16.90
  25   3  -4   -4.60   25.10
 -25   3   4   53.79   17.90
 -23  -3   4   86.69   17.70
 -23   3   4  105.29   18.10
  23   3  -4   49.90   22.30
 -21  -3   4  238.78   20.30
  21   3  -4  188.08   26.20
 -21   3   4  188.28   19.00
  21   3  -4  165.28   19.00
  19  -3  -4  400.76   18.60
  19  -3  -4  390.06   26.10
 -19  -3   4  384.36   23.60
 -19   3   4  385.26   23.90
  19   3  -4  402.06   24.50
  19   3  -4  383.26   30.50
 -17  -3   4  179.18   15.30
  17  -3  -4  177.18   14.80
  17  -3  -4  174.38   13.10
  17  -3  -4  176.18   15.90
  17   3  -4  166.48   14.90
  17   3  -4  156.48   19.00
 -17   3   4  156.98   14.30
 -15  -3   4    9.00    7.50
  15  -3  -4   20.50    6.60
  15  -3  -4   19.70    7.40
  15  -3  -4   13.00    8.60
  15   3  -4   35.30    9.10
  15   3  -4   12.10   10.70
 -15   3   4   11.40    6.50
 -15   3   4   13.30    7.80
  13  -3  -4  426.16   19.50
  13  -3  -4  410.36   16.90
 -13  -3   4  415.16   18.90
  13  -3  -4  407.56   16.70
  13   3  -4  410.06   22.50
 -13   3   4  375.86   17.80
  13   3  -4  399.66   18.50
 -13   3   4  391.66   16.70
  11  -3  -4  911.31   28.60
  11  -3  -4  897.91   27.40
 -11  -3   4  892.21   28.80
  11  -3  -4  873.01   26.50
  11   3  -4  891.01   31.10
 -11   3   4  892.91   27.10
 -11   3   4  892.21   26.80
  11   3  -4  910.61   27.80
   9  -3  -4  451.35   17.50
   9  -3  -4  437.16   17.40
  -9  -3   4  447.26   17.80
   9   3  -4  467.65   19.30
  -9   3   4  446.96   16.00
  -9   3   4  448.66   15.60
   9   3  -4  428.56   16.20
   7  -3  -4 1162.08   34.30
   7  -3  -4 1222.78   33.70
  -7  -3   4 1213.08   34.00
  -7  -3   4 1148.69   28.90
  -7   3   4 1198.48   32.50
   7   3  -4 1198.68   34.60
  -7   3   4 1194.78   30.70
   7   3  -4 1208.18   31.50
   5  -3  -4   40.50    6.00
   5  -3  -4   47.10    6.70
  -5  -3   4   46.30    3.80
  -5  -3   4   33.20    5.70
   5   3  -4   51.59    6.50
  -5   3   4   59.39    4.10
  -5   3   4   49.00    5.70
   5   3  -4   48.30    4.70
  -3  -3   4  671.93   21.10
  -3  -3   4  667.73   18.30
   3  -3  -4  663.43   21.30
   3  -3  -4  660.93   21.30
  -3   3   4  668.63   20.50
  -3   3   4  675.13   21.20
   3   3  -4  686.93   20.00
   3   3  -4  643.34   18.30
  -1  -3   4  531.55   16.00
  -1  -3   4  552.24   15.90
  -1  -3   4  518.05   17.40
   1  -3  -4  519.15   17.20
   1   3  -4  549.74   15.20
   1   3  -4  539.95   14.80
  -1   3   4  507.05   18.70
  -1   3   4  521.35   17.50
   1   3  -4  506.65   15.50
   1   3  -4  544.65   19.00
   1  -3   4  938.61   25.80
   1  -3   4  959.50   26.80
  -1  -3  -4  927.61   26.20
   1  -3   4  929.81   23.70
  -1  -3  -4  914.91   23.60
   1   3   4  933.81   27.30
  -1   3  -4  938.01   24.20
   1   3   4  949.71   29.40
  -1   3  -4  923.51   28.10
  -1   3  -4  931.81   23.60
   3  -3   4  995.40   27.40
  -3  -3  -4  947.31   25.50
   3  -3   4  979.40   27.90
  -3  -3  -4  980.90   27.50
   3  -3   4  954.70   23.60
  -3   3  -4  984.50   29.60
   3   3   4  989.00   32.40
  -3   3  -4  935.81   25.40
   3   3   4  973.50   28.40
  -3   3  -4  967.30   23.50
   5  -3   4 1479.85   39.60
  -5  -3  -4 1472.15   39.10
  -5  -3  -4 1489.65   38.30
   5  -3   4 1495.25   39.40
   5   3   4 1486.65   46.30
  -5   3  -4 1464.15   41.50
  -5   3  -4 1389.36   37.70
   5   3   4 1491.85   40.10
   7  -3   4  476.25   17.70
  -7  -3  -4  459.15   17.10
  -7  -3  -4  433.06   17.00
  -7   3  -4  458.15   19.90
  -7   3  -4  436.86   16.20
   7   3   4  484.65   25.20
   7   3   4  481.65   18.70
  -9  -3  -4   97.79    9.00
   9  -3   4   81.79    8.90
  -9  -3  -4   85.49    9.20
  -9   3  -4   93.09    9.00
   9   3   4   93.49   15.40
  -9   3  -4   78.09   10.20
   9   3   4   96.19    9.90
   9   3   4   82.69    9.30
 -11  -3  -4  290.57   17.20
 -11  -3  -4  361.16   16.40
  11  -3   4  313.07   16.60
 -11   3  -4  309.87   19.50
  11   3   4  285.07   26.20
  11   3   4  308.27   16.50
  13  -3   4  285.27   17.90
 -13  -3  -4  333.57   17.00
 -13  -3  -4  279.47   18.40
  13   3   4  314.17   17.70
 -13   3  -4  280.77   20.80
  13   3   4  308.47   29.60
 -15  -3  -4  748.33   27.20
  15  -3   4  712.43   28.40
 -15  -3  -4  723.53   30.70
  15   3   4  624.34   40.10
 -15   3  -4  708.33   32.90
  15   3   4  734.03   28.00
 -17  -3  -4   63.99   11.30
  17  -3   4   33.10   11.30
 -17  -3  -4   36.60   13.20
  17   3   4   56.89   11.70
  17   3   4   21.80   18.50
 -17   3  -4   45.70   15.40
  19  -3   4   99.29   15.00
 -19  -3  -4  134.59   18.40
 -19   3  -4  118.39   15.60
 -19   3  -4  110.99   19.80
  19   3   4  143.29   27.20
  21  -3   4   18.80   13.60
 -21  -3  -4    6.60   16.10
 -21   3  -4   -6.40   11.90
 -21   3  -4    7.80   18.80
 -23  -3  -4   18.00   18.80
 -23   3  -4   23.10   21.00
 -26  -4   4   23.80   19.70
 -26   4   4    9.00   17.80
  26   4  -4   32.40   28.60
 -24  -4   4   49.20   18.70
 -24   4   4  106.59   19.80
  24   4  -4   63.49   26.70
 -22  -4   4   90.69   17.70
  22   4  -4   96.49   18.10
  22   4  -4  130.89   27.20
 -22   4   4   88.19   17.10
  20  -4  -4  210.88   17.60
 -20  -4   4  239.38   20.80
  20   4  -4  213.08   26.50
  20   4  -4  235.58   20.10
 -20   4   4  212.58   19.40
 -18  -4   4  187.98   17.40
  18  -4  -4  205.98   14.70
 -18   4   4  214.78   17.90
  18   4  -4  194.68   18.40
  18   4  -4  232.78   25.20
 -16  -4   4  105.39   12.90
  16  -4  -4  101.69   13.20
  16  -4  -4  100.09   11.20
  16  -4  -4  106.29   11.10
 -16   4   4  109.39   11.30
 -16   4   4  100.49   12.80
  16   4  -4   98.09   12.70
  16   4  -4  111.99   17.10
  14  -4  -4  -18.20    7.10
  14  -4  -4   -3.70    6.50
  14  -4  -4    5.30    6.10
 -14  -4   4   -5.40    7.00
 -14   4   4    6.60    7.60
  14   4  -4    0.60    8.30
 -14   4   4   -4.60    5.00
  14   4  -4   -2.20   10.00
  12  -4  -4  430.06   18.80
 -12  -4   4  458.55   20.30
  12  -4  -4  425.36   20.00
  12  -4  -4  422.16   16.90
  12   4  -4  454.45   23.60
 -12   4   4  445.26   17.10
  12   4  -4  409.76   19.20
 -12   4   4  429.06   18.30
  10  -4  -4  134.99   11.70
 -10  -4   4  109.59    7.60
 -10  -4   4  130.59   11.30
  10  -4  -4  140.19   11.30
 -10   4   4  129.99    9.20
  10   4  -4  145.59   13.70
 -10   4   4  145.59   10.70
  10   4  -4  125.89   10.30
   8  -4  -4  893.41   28.10
   8  -4  -4  881.91   28.90
  -8  -4   4  888.41   28.20
  -8  -4   4  814.32   23.70
   8   4  -4  886.41   26.10
  -8   4   4  847.12   25.70
  -8   4   4  893.21   25.10
   8   4  -4  861.11   29.80
   6  -4  -4  681.23   23.00
  -6  -4   4  641.64   19.20
   6  -4  -4  688.93   24.00
  -6  -4   4  674.33   22.90
   6   4  -4  656.73   23.20
  -6   4   4  636.34   18.80
   6   4  -4  679.13   20.70
  -6   4   4  630.04   20.90
   4  -4  -4  508.15   19.70
   4  -4  -4  523.55   19.30
  -4  -4   4  532.95   18.80
  -4  -4   4  495.65   16.00
   4  -4  -4  494.95   13.90
  -4   4   4  487.15   14.70
   4   4  -4  509.25   16.50
   4   4  -4  487.95   18.00
  -4   4   4  494.35   18.10
   2  -4  -4  111.69    9.50
  -2  -4   4  122.69    7.70
   2  -4  -4  114.09    5.70
  -2  -4   4  117.09    8.80
  -2   4   4  135.59   10.30
  -2   4   4  124.99    9.40
   2   4  -4  137.99    7.70
   2   4  -4  112.49    7.50
   2   4  -4  118.59    8.40
  -2   4   4  121.49    6.50
   0  -4  -4  633.94   17.70
   0  -4   4  614.74   19.80
   0  -4  -4  642.34   21.30
   0  -4   4  656.03   21.10
   0   4   4  627.24   23.40
   0   4   4  606.94   21.40
   0   4  -4  640.84   18.80
   0   4  -4  665.03   23.00
   0   4  -4  645.44   19.10
  -2  -4  -4  703.13   22.30
   2  -4   4  686.43   22.30
  -2  -4  -4  666.13   19.60
   2  -4   4  708.13   22.00
  -2   4  -4  668.43   20.20
   2   4   4  664.33   26.20
  -2   4  -4  719.73   24.30
   2   4   4  695.13   23.30
  -2   4  -4  681.63   18.70
  -4  -4  -4  262.57   12.90
   4  -4   4  254.57   12.80
   4  -4   4  251.67   13.30
  -4  -4  -4  271.77   11.50
  -4   4  -4  243.68   10.90
   4   4   4  256.27   17.60
   4   4   4  286.97   14.30
  -4   4  -4  252.97   15.00
   6  -4   4   20.70    6.40
   6  -4   4   20.20    6.30
  -6  -4  -4   35.70    6.10
  -6  -4  -4   21.90    6.00
  -6   4  -4   23.80    5.20
   6   4   4   12.80    6.20
   6   4   4   23.10    9.50
  -6   4  -4   24.90    7.90
   8  -4   4    4.80    6.20
  -8  -4  -4    8.40    5.90
  -8  -4  -4    5.90    5.70
   8   4   4    4.90   10.20
  -8   4  -4   16.30    5.10
   8   4   4    9.20    6.80
  -8   4  -4    9.60    7.50
 -10  -4  -4    8.70    7.20
 -10  -4  -4   13.60    6.90
  10  -4   4    2.40    6.90
 -10   4  -4   -4.90    7.80
  10   4   4    6.60   11.70
  12  -4   4  287.07   17.70
 -12  -4  -4  265.27   18.60
 -12  -4  -4  295.17   16.60
  12   4   4  292.17   28.50
 -12   4  -4  279.57   20.00
 -14  -4  -4   23.20   10.70
  14  -4   4    6.90    9.50
 -14  -4  -4   23.40    8.90
  14   4   4   27.50   18.10
 -14   4  -4   16.20   11.80
 -16  -4  -4  474.15   23.10
  16  -4   4  466.55   25.20
 -16  -4  -4  526.35   27.90
  16   4   4  517.25   39.40
 -16   4  -4  453.65   30.30
  18  -4   4  102.29   15.20
 -18  -4  -4   90.59   16.70
  18   4   4  117.29   25.90
 -18   4  -4  100.79   19.40
  20  -4   4  -18.90   11.60
 -20  -4  -4  -17.60   14.90
 -20   4  -4  -14.80   16.90
  20   4   4   10.00   22.10
  22  -4   4  -10.00   13.20
 -22  -4  -4  -15.40   16.50
 -22   4  -4    0.80   13.80
  22   4   4  -15.10   23.80
 -22   4  -4  -35.60   18.70
 -27  -5   4   14.30   21.70
 -27   5   4   -4.80   19.20
  27   5  -4  -13.40   27.50
 -25  -5   4   13.80   19.00
 -25   5   4  -40.30   16.30
  25   5  -4   -7.30   26.30
 -23  -5   4   12.00   16.20
 -23   5   4   -4.40   14.90
  23   5  -4  -12.30   22.50
 -21  -5   4  -15.30   13.00
  21   5  -4  -11.00   18.70
  21   5  -4  -20.00   12.20
 -21   5   4   28.60   14.20
 -19  -5   4   30.90   13.50
  19  -5  -4   29.80   10.60
  19   5  -4    3.30   13.10
  19   5  -4   53.79   19.80
 -19   5   4   33.30   13.20
  17  -5  -4   58.49   10.90
 -17  -5   4   70.99   12.90
  17   5  -4   78.99   19.40
  17   5  -4   76.59   13.30
 -17   5   4   79.39   12.90
  15  -5  -4   47.50   11.40
  15  -5  -4   62.59   10.30
  15  -5  -4   42.10    8.30
 -15  -5   4   60.19   11.10
 -15   5   4   39.20   10.30
 -15   5   4   41.80    7.60
  15   5  -4   60.69   15.80
  15   5  -4   52.09   11.20
 -13  -5   4   52.79    9.70
  13  -5  -4   51.79   10.30
  13  -5  -4   41.00    7.50
  13  -5  -4   44.00    9.50
  13   5  -4   30.60   12.20
 -13   5   4   48.10    9.20
  13   5  -4   53.19   10.00
 -13   5   4   52.39    7.50
  11  -5  -4   64.49   10.10
  11  -5  -4   89.89   11.50
 -11  -5   4   74.79    7.70
 -11  -5   4   64.69    9.60
 -11   5   4   70.79    7.80
  11   5  -4   78.09   12.90
  11   5  -4   81.69    9.80
 -11   5   4   88.79    9.50
  -9  -5   4   28.10    5.90
  -9  -5   4   24.20    7.40
   9  -5  -4   34.70    8.80
   9  -5  -4   28.60    7.80
  -9   5   4   22.10    5.80
   9   5  -4   35.70    9.70
   9   5  -4   21.10    7.00
  -9   5   4   35.50    6.70
  -7  -5   4  157.18   10.70
  -7  -5   4  161.58   12.20
   7  -5  -4  161.48   13.80
   7  -5  -4  178.18   13.40
   7   5  -4  156.08   11.50
   7   5  -4  145.79   13.40
  -7   5   4  151.28    9.90
  -7   5   4  145.89   10.40
  -5  -5   4   53.19    6.70
  -5  -5   4   72.09    8.60
   5  -5  -4   57.09    9.10
   5  -5  -4   46.60    4.90
   5  -5  -4   55.19    9.00
   5   5  -4   34.60    8.10
  -5   5   4   50.49    7.40
   5   5  -4   54.89    7.10
  -5   5   4   59.49    6.00
  -3  -5   4  252.57   12.60
  -3  -5   4  256.57   14.20
   3  -5  -4  239.38   15.20
   3  -5  -4  249.38    9.70
  -3   5   4  253.77   10.70
   3   5  -4  212.48   13.50
   3   5  -4  280.47   12.60
  -3   5   4  257.27   14.10
  -3   5   4  242.88   13.60
   1  -5  -4   96.49    7.00
   1  -5  -4   86.79    9.80
  -1  -5   4  100.79    8.80
  -1  -5   4   90.79    9.00
   1   5  -4  103.49    8.00
   1   5  -4   96.39    8.10
  -1   5   4  101.99    9.80
  -1   5   4   69.99    9.70
   1   5  -4  108.19   10.90
   1   5  -4   99.89    9.00
   1  -5   4  872.71   27.00
  -1  -5  -4  834.42   24.00
  -1  -5  -4  900.71   28.20
   1  -5   4  849.02   27.20
   1   5   4  844.52   28.20
  -1   5  -4  859.11   25.40
  -1   5  -4  836.82   29.30
   1   5   4  815.62   30.90
  -1   5  -4  851.51   25.40
  -3  -5  -4   13.80    6.20
  -3  -5  -4   17.40    5.20
   3  -5   4   13.20    5.80
   3  -5   4   12.50    5.90
   3   5   4   16.80    7.10
  -3   5  -4   12.90    5.30
  -3   5  -4   20.80    4.90
   3   5   4   17.00    8.60
  -3   5  -4   13.20    6.90
   5  -5   4  216.48   13.90
  -5  -5  -4  239.28   13.70
  -5  -5  -4  234.48   12.40
   5  -5   4  219.18   14.00
  -5   5  -4  247.18   16.10
   5   5   4  257.27   19.50
  -5   5  -4  224.98   11.70
   5   5   4  245.58   15.00
   7  -5   4    7.50    6.60
  -7  -5  -4    4.50    5.90
  -7  -5  -4   13.70    6.50
   7   5   4   20.10   10.90
  -7   5  -4    3.90    7.70
   7   5   4    4.90    7.10
   9  -5   4    8.90    7.40
  -9  -5  -4   12.50    7.20
  -9  -5  -4   -4.10    6.30
   9   5   4   13.10    9.20
   9   5   4    2.80   11.30
  -9   5  -4   11.30    9.30
  11  -5   4   15.30    8.70
 -11  -5  -4   13.50    8.00
 -11  -5  -4    7.00    8.30
 -11   5  -4    7.30   10.00
  11   5   4   -3.00   13.40
 -13  -5  -4    6.70    9.80
 -13  -5  -4   -6.70    7.90
  13  -5   4    1.50    9.30
  13   5   4   -3.50   14.50
 -13   5  -4   -8.90   11.00
 -15  -5  -4    1.70   11.60
  15  -5   4    7.10   10.80
 -15  -5  -4   10.50    9.50
  15   5   4   13.20   18.20
 -15   5  -4   22.30   13.70
  17  -5   4   10.90   12.00
 -17  -5  -4   14.30   13.80
 -17   5  -4   22.70   16.20
  17   5   4   52.79   23.70
 -19  -5  -4    8.20   16.30
  19  -5   4    9.50   13.10
 -19   5  -4   -8.20   17.90
  19   5   4   11.70   22.90
  21  -5   4   -5.80   13.80
 -21  -5  -4   16.70   17.60
 -21   5  -4    0.80   19.90
  21   5   4    3.90   23.10
 -26  -6   4   -1.40   20.40
  26   6  -4   12.90   28.90
 -26   6   4   -6.20   18.70
 -24  -6   4    5.00   18.40
 -24   6   4  -37.00   15.60
  24   6  -4    8.50   25.50
 -22  -6   4   42.40   17.50
  22   6  -4   11.30   24.80
 -22   6   4   18.20   16.10
  22   6  -4   16.00   16.30
 -20  -6   4   68.49   16.70
  20  -6  -4  100.49   14.60
 -20   6   4   82.19   16.50
  20   6  -4   52.89   17.00
  20   6  -4   25.10   21.80
 -18  -6   4  221.38   20.50
  18  -6  -4  231.78   18.20
  18   6  -4  207.98   20.00
 -18   6   4  231.38   19.90
  18   6  -4  208.78   28.60
  16  -6  -4  116.69   14.00
 -16  -6   4   88.69   14.00
  16   6  -4   55.99   13.70
 -16   6   4   73.39   13.40
  16   6  -4   88.59   20.30
  14  -6  -4    2.30    8.70
  14  -6  -4   -4.30   10.10
 -14  -6   4    0.60    8.80
 -14   6   4   -3.80    5.80
  14   6  -4    3.50   13.60
  14   6  -4   -9.20    9.50
 -14   6   4   26.10    9.80
 -12  -6   4   92.99   12.10
  12  -6  -4   86.69   13.40
  12  -6  -4   94.19   12.60
  12   6  -4   92.19   16.20
 -12   6   4  119.09   10.20
 -12   6   4  100.69   11.40
  12   6  -4  102.79   12.00
  10  -6  -4  287.57   18.70
 -10  -6   4  295.37   18.10
 -10  -6   4  302.57   15.40
  10  -6  -4  288.07   18.90
  10   6  -4  252.07   21.30
  10   6  -4  296.77   17.40
 -10   6   4  282.57   15.90
 -10   6   4  316.47   15.00
   8  -6  -4  522.65   23.50
   8  -6  -4  509.85   24.00
  -8  -6   4  542.95   20.90
  -8  -6   4  552.54   23.30
   8   6  -4  535.95   26.60
  -8   6   4  564.64   20.40
   8   6  -4  537.35   21.80
  -8   6   4  549.95   20.40
  -6  -6   4  303.57   16.10
   6  -6  -4  309.27   12.90
   6  -6  -4  308.67   19.00
   6  -6  -4  355.96   18.90
  -6  -6   4  334.57   17.90
  -6   6   4  318.37   14.40
   6   6  -4  368.46   20.50
   6   6  -4  322.87   16.50
  -6   6   4  354.66   16.20
  -4  -6   4   -0.90    5.50
  -4  -6   4   -4.70    6.20
   4  -6  -4    3.40    7.10
   4  -6  -4    6.80    4.10
   4   6  -4    3.70    5.80
  -4   6   4   -2.20    4.70
   4   6  -4    6.50    8.00
  -4   6   4   -4.60    5.40
  -4   6   4    2.90    6.30
  -2  -6   4  453.85   19.60
   2  -6  -4  469.45   21.40
  -2  -6   4  412.86   18.70
   2  -6  -4  441.16   15.20
   2   6  -4  420.56   17.50
   2   6  -4  454.35   20.50
   2   6  -4  439.86   17.60
  -2   6   4  458.25   19.80
  -2   6   4  421.36   16.30
  -2   6   4  464.65   21.00
   0  -6   4  282.07   15.70
   0  -6  -4  279.97   12.60
   0  -6   4  286.17   15.70
   0  -6  -4  307.77   17.00
   0   6   4  269.97   18.10
   0   6   4  282.07   16.40
   0   6  -4  285.37   16.60
   0   6  -4  284.87   17.70
   0   6  -4  291.87   14.00
   0   6  -4  267.57   13.80
   2  -6   4 1631.94   45.40
   2  -6   4 1613.94   45.50
  -2  -6  -4 1605.64   46.10
  -2  -6  -4 1565.04   41.80
  -2   6  -4 1568.24   47.50
  -2   6  -4 1556.74   42.80
   2   6   4 1591.34   50.99
  -2   6  -4 1571.94   43.40
   2   6   4 1530.65   46.30
   4  -6   4  629.84   24.00
  -4  -6  -4  567.24   23.50
  -4  -6  -4  622.84   21.10
   4  -6   4  541.15   22.70
  -4   6  -4  571.04   25.00
  -4   6  -4  615.94   21.40
   4   6   4  581.94   24.30
   4   6   4  582.74   29.40
   6  -6   4  461.55   21.20
   6  -6   4  490.65   21.30
  -6  -6  -4  484.25   20.90
  -6  -6  -4  453.25   19.50
   6   6   4  489.45   28.50
  -6   6  -4  418.76   22.70
   6   6   4  466.35   22.00
  -8  -6  -4  223.38   15.50
   8  -6   4  220.18   16.40
  -8  -6  -4  217.88   15.60
   8   6   4  188.58   15.90
   8   6   4  221.18   24.00
  -8   6  -4  216.18   17.90
 -10  -6  -4   52.99   10.20
 -10  -6  -4   69.29   11.10
  10  -6   4   56.29   11.30
 -10   6  -4   69.09   13.80
  10   6   4   70.29   17.60
  12  -6   4  131.99   15.20
 -12  -6  -4  146.39   14.40
 -12  -6  -4  166.28   15.60
 -12   6  -4  164.48   18.10
  12   6   4  196.98   25.60
 -14  -6  -4   60.59   11.90
 -14  -6  -4   70.89   13.90
  14  -6   4   61.99   13.60
  14   6   4   56.59   21.00
 -14   6  -4   79.89   16.90
 -16  -6  -4   20.70   13.90
  16  -6   4    9.80   12.40
 -16   6  -4   13.00   16.50
  16   6   4   35.70   21.40
 -18  -6  -4   21.90   16.00
  18  -6   4   13.80   14.40
 -18   6  -4    6.10   18.10
  18   6   4   23.50   22.20
  20  -6   4    0.00   14.60
 -20  -6  -4    0.30   16.70
 -20   6  -4   -8.30   19.40
  20   6   4  -18.60   23.20
 -22  -6  -4   -0.10   19.20
  22  -6   4    2.40   15.50
  22   6   4   53.09   28.30
 -22   6  -4  -15.30   20.80
 -25  -7   4    0.20   20.80
  25   7  -4   16.00   27.20
 -25   7   4  -27.50   17.50
 -23  -7   4   11.80   19.20
  23   7  -4   25.90   26.10
 -23   7   4  -11.20   17.20
 -21  -7   4  121.09   21.70
  21  -7  -4  107.79   16.30
 -21   7   4   67.29   18.10
  21   7  -4   94.39   28.60
  21   7  -4   85.29   19.10
  19  -7  -4   55.49   13.70
 -19  -7   4   91.19   18.00
 -19   7   4   90.49   16.90
  19   7  -4   59.89   16.20
  19   7  -4   45.20   23.70
 -17  -7   4  116.19   17.80
  17  -7  -4  122.59   16.40
  17   7  -4  130.79   25.20
  17   7  -4  146.69   19.10
 -17   7   4  109.89   16.20
 -15  -7   4   -2.00   11.20
  15  -7  -4   -7.00    9.80
  15   7  -4   15.90   18.60
  15   7  -4    5.00   11.40
 -15   7   4    6.80   11.30
 -13  -7   4   15.30   10.60
  13  -7  -4   17.30   10.70
  13   7  -4    4.60   10.00
 -13   7   4   18.00   10.00
  13   7  -4   18.20   16.00
 -11  -7   4  146.59   12.80
  11  -7  -4  119.79   14.80
 -11  -7   4  121.29   13.90
  11  -7  -4  128.79   15.30
 -11   7   4  136.49   11.10
  11   7  -4  125.49   14.50
  11   7  -4   85.79   18.20
 -11   7   4  110.09   12.70
  -9  -7   4  561.24   24.80
   9  -7  -4  508.45   25.50
   9  -7  -4  539.15   26.80
  -9  -7   4  582.14   23.20
   9   7  -4  503.65   23.80
  -9   7   4  499.45   21.60
  -9   7   4  487.45   20.50
   9   7  -4  568.44   31.20
   7  -7  -4  509.45   25.40
   7  -7  -4  488.15   18.30
   7  -7  -4  543.55   24.70
  -7  -7   4  522.05   22.20
  -7  -7   4  482.05   23.20
   7   7  -4  492.65   22.30
  -7   7   4  495.75   20.00
   7   7  -4  525.35   28.40
  -7   7   4  477.65   20.80
   5  -7  -4  435.96   22.80
   5  -7  -4  431.16   16.10
  -5  -7   4  406.86   21.00
  -5  -7   4  417.56   20.40
  -5   7   4  409.66   19.70
  -5   7   4  382.36   20.10
  -5   7   4  428.16   17.90
   5   7  -4  424.06   24.60
   5   7  -4  425.36   19.70
   3  -7  -4   71.99    7.30
  -3  -7   4   68.39   10.10
  -3  -7   4   72.09   10.40
   3  -7  -4   83.09   12.00
  -3   7   4   81.79   11.00
  -3   7   4   79.59    8.80
   3   7  -4   68.89   12.60
   3   7  -4   62.79    9.40
  -3   7   4   58.99   10.50
   3   7  -4   67.59    9.40
   1  -7  -4   34.80    9.50
  -1  -7   4   34.20    9.00
   1  -7  -4   43.30    6.90
  -1  -7   4   35.10    8.60
  -1   7   4   49.99   10.60
  -1   7   4   32.40    9.20
   1   7  -4   34.10    7.80
   1   7  -4   34.00    9.90
   1   7  -4   31.40    7.60
   1   7  -4   48.60   11.20
  -1  -7  -4  827.82   30.70
  -1  -7  -4  787.42   25.10
   1  -7   4  761.52   28.20
   1  -7   4  762.22   29.50
  -1   7  -4  792.92   27.90
  -1   7  -4  796.12   26.80
   1   7   4  769.52   29.70
   1   7   4  785.52   32.90
  -1   7  -4  833.12   31.50
   3  -7   4  272.27   16.80
  -3  -7  -4  246.18   18.00
   3  -7   4  224.08   16.70
  -3  -7  -4  258.77   14.80
   3   7   4  234.88   21.40
  -3   7  -4  270.97   18.90
  -3   7  -4  247.28   13.80
   3   7   4  253.77   17.60
  -5  -7  -4  183.08   12.90
   5  -7   4  135.69   13.00
  -5  -7  -4  141.49   13.90
   5  -7   4  163.78   14.90
  -5   7  -4  149.49   16.00
   5   7   4  168.98   19.40
   5   7   4  156.38   14.60
   7  -7   4   23.60    9.30
  -7  -7  -4   34.90    9.80
  -7  -7  -4   50.49    9.80
   7  -7   4   17.50    9.30
  -7   7  -4   41.00   12.10
   7   7   4   25.00   13.60
   7   7   4   76.59   17.30
   9  -7   4  -11.80    8.80
  -9  -7  -4   -7.50    8.50
  -9  -7  -4    5.50    9.30
   9   7   4   -9.30   13.30
  -9   7  -4   11.40   11.10
 -11  -7  -4   26.60   10.90
  11  -7   4   22.20   11.60
 -11  -7  -4   28.10   10.80
 -11   7  -4   27.00   13.60
  11   7   4   24.90   17.20
 -13  -7  -4   12.00   11.90
  13  -7   4    3.20   11.80
 -13  -7  -4   22.60   11.10
  13   7   4   12.10   17.50
 -13   7  -4  -25.60   12.70
 -15  -7  -4  102.19   16.30
 -15  -7  -4   97.09   16.40
  15  -7   4   84.49   16.30
  15   7   4  119.09   25.60
 -15   7  -4  131.29   21.00
  17  -7   4   64.49   16.20
 -17  -7  -4  137.59   19.70
  17   7   4  142.69   29.60
 -17   7  -4   93.59   22.10
 -19  -7  -4   -5.70   17.00
  19  -7   4   39.10   16.60
 -19   7  -4   16.80   21.10
  19   7   4   39.00   26.00
  21  -7   4  -14.30   16.20
 -21  -7  -4   11.70   18.70
  21   7   4  -21.60   24.40
 -21   7  -4  -17.30   21.00
 -24  -8   4  -22.20   20.40
 -24   8   4  -31.20   18.40
  24   8  -4  -40.70   24.30
 -22  -8   4  -10.70   18.40
  22  -8  -4    9.00   14.90
  22   8  -4  -10.80   23.80
 -22   8   4  -26.70   16.50
  20  -8  -4   -7.40   13.10
 -20  -8   4    0.30   17.20
  20   8  -4  -10.60   15.30
  20   8  -4   -0.40   22.30
 -20   8   4    4.00   15.90
  18  -8  -4    8.80   13.30
 -18  -8   4   22.20   16.00
 -18   8   4   33.20   14.80
  18   8  -4   24.30   16.30
  18   8  -4   19.70   22.80
  16  -8  -4    0.00   12.80
 -16  -8   4   -2.80   13.50
 -16   8   4    2.70   12.70
  16   8  -4   15.60   19.60
  16   8  -4    7.00   13.50
  14  -8  -4    6.50   11.60
 -14  -8   4    5.90   12.70
  14   8  -4   14.70   18.40
  14   8  -4   -1.00   12.00
 -14   8   4    1.10   11.00
  12  -8  -4   82.39   14.60
 -12  -8   4   55.89   13.30
  12   8  -4   74.69   19.80
 -12   8   4   76.29   13.10
  12   8  -4   87.49   14.50
  10  -8  -4   78.79   14.40
 -10  -8   4  105.19   12.80
 -10  -8   4  111.39   14.50
  10   8  -4   86.69   20.10
 -10   8   4  101.29   11.20
 -10   8   4   96.19   12.50
  10   8  -4   98.39   14.70
   8  -8  -4  139.09   16.50
   8  -8  -4  117.29   18.70
  -8  -8   4  159.78   14.70
  -8  -8   4  140.29   14.80
  -8   8   4  118.09   12.30
   8   8  -4  154.68   21.10
   8   8  -4  138.69   14.40
  -8   8   4  126.79   12.80
   6  -8  -4   21.90    7.10
  -6  -8   4   19.50    9.20
   6  -8  -4   19.00   10.20
  -6  -8   4   25.00   10.30
  -6   8   4   26.80    8.90
   6   8  -4   24.90    9.50
  -6   8   4   13.60    7.80
  -6   8   4   10.00    8.70
   6   8  -4    0.10   12.70
  -4  -8   4   15.60    9.10
   4  -8  -4   12.90    6.50
  -4  -8   4    7.00    8.20
   4  -8  -4    7.10    9.30
  -4   8   4    7.00    7.00
  -4   8   4   16.50    9.00
   4   8  -4   -8.10   11.90
   4   8  -4    5.00    8.60
  -4   8   4    7.20    8.60
   2  -8  -4   34.30   10.90
   2  -8  -4   28.60    7.40
  -2  -8   4   21.10    9.20
  -2  -8   4   10.80    8.70
  -2   8   4   13.90    9.70
   2   8  -4   32.10   12.00
  -2   8   4   16.70    7.40
  -2   8   4   22.10    9.50
   2   8  -4   17.30   10.30
   2   8  -4   41.70    9.30
   0  -8   4  117.89   14.00
   0  -8  -4  135.89   14.70
   0  -8   4  111.69   12.60
   0  -8  -4  124.39   10.60
   0   8  -4  138.79   14.60
   0   8   4  129.69   14.60
   0   8  -4  113.39   12.00
   0   8  -4  120.99   15.20
   0   8   4  117.09   15.20
  -2  -8  -4   56.79   11.70
   2  -8   4   25.90   10.10
   2  -8   4   29.00    9.30
  -2  -8  -4   38.20    8.30
  -2   8  -4   24.00   11.00
  -2   8  -4   38.00    9.00
   2   8   4   45.10   12.60
  -2   8  -4   26.50   14.80
   2   8   4   33.10   10.70
   4  -8   4   11.30    9.40
  -4  -8  -4    8.20    9.60
   4  -8   4   -2.10    8.20
  -4  -8  -4   14.90    8.50
  -4   8  -4   20.00   10.60
   4   8   4    1.30    9.20
   4   8   4   19.20   12.50
  -6  -8  -4  102.99   14.50
  -6  -8  -4  131.69   12.90
   6  -8   4  109.99   14.60
   6  -8   4   95.09   12.40
  -6   8  -4   77.39   14.70
   6   8   4   85.59   17.80
   8  -8   4   37.30   12.50
   8  -8   4   52.89   11.20
  -8  -8  -4   29.10   10.60
  -8  -8  -4   33.50   12.10
  -8   8  -4   47.10   14.70
   8   8   4   36.00   15.60
 -10  -8  -4   23.30   11.50
  10  -8   4   -2.30   11.30
 -10  -8  -4   -0.90   10.80
 -10   8  -4   -0.10   13.20
  10   8   4   -2.70   14.60
  12  -8   4   38.20   14.30
 -12  -8  -4   43.40   13.20
 -12  -8  -4   17.10   12.00
  12   8   4   13.20   18.20
 -12   8  -4   53.99   17.40
  14  -8   4    3.70   13.90
 -14  -8  -4    4.10   12.10
 -14  -8  -4   33.00   14.20
 -14   8  -4   11.00   16.70
  14   8   4   32.70   20.00
 -16  -8  -4    5.30   14.90
  16  -8   4    9.10   15.50
  16   8   4   15.70   21.70
 -16   8  -4  -16.20   18.10
  18  -8   4   24.80   16.50
 -18  -8  -4    9.10   16.70
  18   8   4   37.90   25.40
 -18   8  -4   34.90   21.70
  20  -8   4  -14.80   16.90
 -20  -8  -4  -18.70   18.00
 -20   8  -4   11.40   22.40
  20   8   4   33.40   26.70
  23  -9  -4   41.00   24.60
 -21  -9   4   40.40   20.40
  21  -9  -4   34.10   16.50
  21   9  -4   16.80   19.30
  21   9  -4  -17.90   22.10
  19  -9  -4    1.70   14.60
 -19  -9   4  -29.90   16.00
  19   9  -4  -15.40   16.90
  19   9  -4  -41.00   20.30
  17  -9  -4   -9.90   13.80
 -17  -9   4   15.00   16.30
  17   9  -4   -0.70   16.20
 -17   9   4  -23.00   14.20
  17   9  -4  -13.20   20.70
  15  -9  -4    9.80   13.70
 -15  -9   4   30.10   15.00
  15   9  -4   -2.10   19.40
 -15   9   4    1.10   12.60
  15   9  -4  -16.30   14.40
 -13  -9   4   24.60   14.30
  13  -9  -4    6.10   12.60
 -13   9   4   13.80   12.30
  13   9  -4   51.29   20.60
  13   9  -4    5.50   13.10
  11  -9  -4   86.59   15.80
 -11  -9   4  125.49   17.00
 -11   9   4  101.99   14.10
  11   9  -4   92.79   22.00
  11   9  -4   95.69   16.30
  -9  -9   4   12.30    9.50
   9  -9  -4   17.00   11.80
  -9  -9   4   -4.70   10.90
  -9   9   4   22.30   10.10
   9   9  -4    1.90   15.90
   9   9  -4    4.10   12.10
  -9   9   4   20.20   10.00
  -7  -9   4  297.17   21.40
  -7  -9   4  342.87   22.00
   7  -9  -4  349.17   24.00
   7  -9  -4  301.17   17.50
  -7   9   4  321.87   22.90
  -7   9   4  282.67   18.90
   7   9  -4  278.07   26.10
   7   9  -4  303.97   22.60
  -5  -9   4  -10.30    9.80
   5  -9  -4   -0.70   10.50
  -5  -9   4    1.20    9.00
   5  -9  -4    2.50    7.60
  -5   9   4   -8.10    9.70
   5   9  -4  -29.60   13.20
  -5   9   4    4.60    8.50
   5   9  -4    3.90    9.90
  -5   9   4    1.60    9.10
  -3  -9   4   -4.50    9.10
   3  -9  -4   14.80   11.20
   3  -9  -4   11.90    7.70
  -3  -9   4   -1.20    9.50
   3   9  -4   -8.20    8.90
  -3   9   4    5.80    8.30
  -3   9   4  -18.60    8.90
  -3   9   4   -2.30    9.40
   3   9  -4   -4.80   12.50
   1  -9  -4   24.60   11.70
  -1  -9   4   12.20   10.10
  -1  -9   4    8.20    9.60
   1  -9  -4   27.50    8.40
   1   9  -4   10.30   12.40
  -1   9   4  -10.50    9.50
  -1   9   4    4.00    8.60
   1   9  -4   19.50    9.90
   1   9  -4   26.30   12.50
  -1   9   4   20.90   11.50
   1  -9   4   19.80   11.10
  -1  -9  -4   36.00   11.90
   1  -9   4   45.70   11.10
  -1  -9  -4   32.00    9.40
  -1   9  -4   37.10   13.30
   1   9   4   33.70   13.40
  -1   9  -4   35.50   10.40
   1   9   4   42.90   11.60
   3  -9   4  137.39   16.60
   3  -9   4   92.39   13.30
  -3  -9  -4  137.29   16.40
  -3  -9  -4  130.19   12.80
   3   9   4  122.99   21.50
   3   9   4  121.49   19.50
  -3   9  -4  112.69   13.80
  -3   9  -4  105.39   16.40
   5  -9   4   81.99   14.70
  -5  -9  -4   61.29   11.90
   5  -9   4   58.59   12.00
  -5  -9  -4   74.59   14.00
   5   9   4  102.39   18.90
  -5   9  -4   39.50   14.40
   7  -9   4  110.29   14.20
  -7  -9  -4  123.29   14.30
  -7  -9  -4   84.19   15.00
   7  -9   4  126.29   16.90
  -7   9  -4   78.99   17.30
   7   9   4   99.89   20.80
   9  -9   4    1.70   10.40
  -9  -9  -4  -10.80   11.00
   9  -9   4   12.60   13.10
  -9  -9  -4  -10.20   10.50
   9   9   4    4.90   15.40
  -9   9  -4   28.40   15.30
 -11  -9  -4   30.00   13.00
  11  -9   4   15.90   14.20
 -11  -9  -4   -3.90   12.30
  11   9   4   14.90   17.70
 -11   9  -4   12.70   15.70
 -13  -9  -4  124.99   18.50
  13  -9   4  124.69   19.80
 -13  -9  -4  126.59   18.60
  13   9   4  100.39   23.80
 -13   9  -4   87.59   20.60
  15  -9   4    5.20   15.90
 -15  -9  -4   11.90   15.90
 -15   9  -4    2.90   19.10
  15   9   4   12.00   21.10
 -17  -9  -4   41.10   19.00
  17  -9   4   33.60   17.90
 -17   9  -4   37.60   22.20
  17   9   4   40.70   23.90
  20 -10  -4   31.10   17.50
 -20 -10   4   93.89   22.20
  20  10  -4   68.89   26.90
  20  10  -4   11.10   19.50
 -18 -10   4   43.70   19.20
  18 -10  -4   69.99   18.00
  18  10  -4   11.60   23.30
  18  10  -4   16.30   19.70
  16 -10  -4   -6.80   14.60
 -16 -10   4   27.30   17.10
  16  10  -4    9.70   21.10
  16  10  -4  -11.60   15.40
 -14 -10   4   27.30   16.00
  14 -10  -4    7.90   13.60
  14  10  -4   22.90   16.10
  14  10  -4   14.00   20.10
  12 -10  -4   -4.90   13.60
 -12 -10   4   27.00   14.70
  12  10  -4   22.50   15.40
  12  10  -4   -4.50   17.80
  10 -10  -4  143.19   19.00
 -10 -10   4  179.28   19.20
  10  10  -4  140.09   23.80
  10  10  -4  184.88   21.10
  -8 -10   4   39.50   12.00
  -8 -10   4   31.70   14.10
   8 -10  -4   59.29   15.60
   8  10  -4    3.60   16.80
   8  10  -4   27.10   13.30
  -6 -10   4  641.14   32.30
  -6 -10   4  660.23   31.20
   6 -10  -4  637.14   32.70
   6  10  -4  594.34   31.10
  -6  10   4  636.34   39.50
   6  10  -4  624.74   36.90
  -6  10   4  627.44   28.90
  -4 -10   4  180.28   18.00
   4 -10  -4  152.78   18.70
  -4 -10   4  187.68   18.80
   4  10  -4  140.19   17.60
  -4  10   4  190.38   21.80
  -4  10   4  166.58   18.40
   4  10  -4  148.49   20.70
   2 -10  -4   17.60   12.90
  -2 -10   4   -3.80   10.50
  -2 -10   4   -4.30   10.50
   2  10  -4    2.80   13.60
   2  10  -4   -1.80   10.80
  -2  10   4  -15.10   10.40
   2  10  -4  -13.70   13.30
  -2  10   4   -4.20   15.30
   0 -10   4   50.59   12.60
   0 -10   4   80.79   15.00
   0 -10  -4   63.29   15.30
   0  10   4   48.30   15.80
   0  10  -4   96.09   14.30
   0  10  -4   57.29   16.40
  -2 -10  -4  157.18   19.00
   2 -10   4  160.98   18.50
   2 -10   4  134.99   15.90
  -2  10  -4  183.48   21.30
  -2  10  -4  144.49   16.60
   2  10   4  188.98   22.10
  -4 -10  -4  203.98   25.00
  -4 -10  -4  184.38   19.70
   4 -10   4  182.78   20.30
   4 -10   4  208.48   18.40
   4  10   4  218.18   24.80
  -4  10  -4  220.08   19.30
  -4  10  -4  199.28   22.30
   6 -10   4   94.99   15.20
  -6 -10  -4  113.69   17.70
  -6 -10  -4  111.99   20.40
   6 -10   4  106.09   17.30
  -6  10  -4  149.39   21.30
   6  10   4  127.69   22.30
   8 -10   4  -10.30   12.30
  -8 -10  -4    0.90   13.00
  -8 -10  -4  -18.60   15.20
   8 -10   4   -8.60   11.20
   8  10   4  -12.30   15.60
  -8  10  -4  -15.90   14.70
 -10 -10  -4   -2.10   13.30
  10 -10   4   -9.60   13.80
 -10 -10  -4   27.00   18.60
 -10  10  -4    1.30   16.00
  10  10   4   15.40   17.80
 -12 -10  -4  120.39   19.10
  12 -10   4  106.59   20.80
 -12  10  -4  103.09   22.50
  12  10   4  122.79   25.40
  14 -10   4  161.88   23.40
 -14  10  -4  135.89   24.80
  14  10   4  138.39   28.00
  16 -10   4   11.10   17.60
 -16  10  -4   11.70   21.90
  16  10   4   21.10   23.80
  19 -11  -4   14.10   18.30
 -19 -11   4   27.10   21.50
  19  11  -4   -1.30   19.80
  19  11  -4   35.80   26.60
  17 -11  -4   33.60   18.00
 -17 -11   4   18.90   19.20
  17  11  -4  -15.20   21.80
  17  11  -4   31.40   19.60
 -15 -11   4  -20.70   17.00
  15 -11  -4    7.50   16.60
  15  11  -4   22.60   21.80
  15  11  -4   -1.40   17.80
  13 -11  -4   -8.60   14.70
 -13 -11   4  -21.30   15.30
  13  11  -4    0.90   19.70
  13  11  -4    6.00   16.50
  11 -11  -4    8.20   15.20
 -11 -11   4    7.80   14.90
  11  11  -4   45.50   17.00
  11  11  -4   45.40   20.90
  -9 -11   4    2.30   14.10
   9 -11  -4   -9.80   13.90
   9  11  -4   -8.70   17.60
   9  11  -4   12.80   14.80
   7 -11  -4    0.80   13.70
  -7 -11   4    1.70   11.30
  -7 -11   4  -11.50   13.60
   7  11  -4  -12.20   16.20
   7  11  -4    8.70   14.20
   5 -11  -4    9.20   13.80
  -5 -11   4   25.20   13.80
  -5 -11   4   27.50   12.50
   5  11  -4   20.20   16.90
  -5  11   4   22.70   12.50
   5  11  -4   13.70   13.00
   3 -11  -4    3.40   13.30
  -3 -11   4    7.20   12.40
  -3 -11   4   21.70   12.90
  -3  11   4  -11.40   11.80
   3  11  -4  -11.30   16.70
   3  11  -4   12.70   13.30
   3  11  -4  -12.30   14.50
   1 -11  -4   -3.80   13.70
  -1 -11   4   17.30   12.50
  -1 -11   4   16.10   12.00
   1  11  -4   31.30   14.10
   1  11  -4   41.20   16.70
  -1  11   4   21.00   14.20
   1 -11   4   22.10   13.90
  -1 -11  -4   30.20   15.50
   1 -11   4   14.30   12.20
  -1  11  -4   28.30   13.40
  -1  11  -4   39.50   16.40
   1  11   4   22.50   14.90
  -3 -11  -4   37.40   15.40
   3 -11   4   52.59   15.70
   3 -11   4   12.30   12.40
  -3  11  -4   52.99   14.30
   3  11   4   66.59   18.30
  -3  11  -4   36.50   16.90
   5 -11   4   86.39   15.50
   5 -11   4   92.29   17.90
  -5 -11  -4   79.79   17.40
  -5  11  -4   92.39   16.90
  -5  11  -4   92.09   19.80
   5  11   4   86.79   20.60
   7 -11   4   48.50   16.50
  -7 -11  -4   46.00   15.90
   7 -11   4   27.50   13.90
  -7  11  -4   39.80   14.80
  -7  11  -4   35.40   18.10
   7  11   4   67.39   20.00
   9 -11   4   42.40   16.70
   9 -11   4   17.90   14.10
  -9 -11  -4   -9.40   14.80
   9  11   4   38.40   20.50
  -9  11  -4    6.10   17.40
  11 -11   4   12.70   17.10
 -11 -11  -4   -9.90   15.30
 -11  11  -4  -14.30   17.70
  11  11   4    6.50   19.00
  13 -11   4   44.30   18.80
 -13  11  -4   16.50   21.30
  13  11   4   57.69   23.30
  15 -11   4   -2.50   18.00
 -15  11  -4   26.90   22.00
  15  11   4   56.69   25.10
 -16 -12   4  -17.20   19.10
  16 -12  -4    2.80   18.10
  16  12  -4   -8.10   19.30
  16  12  -4  -21.50   23.50
  14 -12  -4   31.20   18.40
 -14 -12   4   48.10   19.50
  14  12  -4  -16.20   18.00
  14  12  -4  -17.70   21.50
 -12 -12   4   19.90   17.80
  12 -12  -4   29.20   17.70
  12  12  -4   19.60   18.40
  12  12  -4  -25.90   20.00
 -10 -12   4  -15.00   16.20
  10 -12  -4   25.90   16.60
  10  12  -4   28.30   17.50
  10  12  -4  -21.50   19.00
   8 -12  -4   32.40   16.60
  -8 -12   4   41.60   17.40
   8  12  -4   43.60   17.50
   8  12  -4   32.50   20.10
   6 -12  -4   12.60   15.60
  -6 -12   4   21.90   12.70
  -6 -12   4   23.10   15.50
   6  12  -4   -0.90   16.10
   6  12  -4    4.20   17.50
  -4 -12   4    6.80   13.10
   4 -12  -4    9.60   14.80
  -4 -12   4    7.70   14.40
   4  12  -4   15.40   15.50
   4  12  -4   14.60   18.20
  -2 -12   4   48.10   16.00
  -2 -12   4   22.00   14.20
   2 -12  -4   36.00   15.90
  -2  12   4   33.60   15.60
   2  12  -4    3.10   18.20
   2  12  -4   30.20   16.00
   0 -12  -4   33.90   15.90
   0 -12   4   20.50   14.00
   0 -12   4  -13.70   13.00
   0  12  -4    9.40   14.90
   0  12  -4   14.20   18.40
   0  12   4   40.20   16.80
   2 -12   4    9.80   13.10
  -2 -12  -4    4.10   15.40
   2 -12   4   27.40   15.30
  -2  12  -4    4.40   17.20
  -2  12  -4   13.50   14.50
   2  12   4  -29.50   14.50
   4 -12   4   38.80   14.90
   4 -12   4   25.40   15.70
  -4 -12  -4   13.90   16.30
  -4  12  -4   15.00   17.20
  -4  12  -4   22.60   15.70
   4  12   4   26.50   18.00
   6 -12   4   19.10   15.90
   6 -12   4   -3.90   13.40
  -6 -12  -4    4.20   16.00
  -6  12  -4   10.00   16.20
  -6  12  -4  -29.40   16.90
   6  12   4   30.30   19.40
   8 -12   4   20.50   15.50
   8 -12   4   19.90   16.80
  -8 -12  -4  -23.40   15.60
   8  12   4   13.30   19.20
  -8  12  -4   22.00   20.70
  -8  12  -4   36.60   18.30
  10 -12   4    4.30   17.00
 -10 -12  -4  -12.20   16.00
 -10  12  -4   -0.80   20.40
  10  12   4   -7.30   19.60
  12 -12   4   27.50   19.80
 -12  12  -4   30.80   22.70
  12  12   4   36.60   23.30
 -13 -13   4   24.20   19.80
  13 -13  -4   -0.40   17.90
  13  13  -4  -33.80   21.50
  13  13  -4    5.30   19.90
 -11 -13   4    0.90   18.40
  11 -13  -4   29.40   18.40
  11  13  -4   13.90   19.10
  11  13  -4   -4.90   22.40
  -9 -13   4   34.70   19.20
   9 -13  -4   62.79   19.60
   9  13  -4   52.59   23.50
   9  13  -4   41.40   19.20
   7 -13  -4   73.89   19.70
  -7 -13   4   76.89   19.70
   7  13  -4   84.99   21.00
   7  13  -4   45.10   22.10
  -5 -13   4   68.29   15.60
  -5 -13   4   14.20   17.80
   5 -13  -4    9.50   16.80
   5  13  -4   32.30   20.50
   5  13  -4   11.80   18.10
  -3 -13   4   37.70   16.10
  -3 -13   4   28.00   16.20
   3 -13  -4   49.00   18.20
   3  13  -4   39.20   18.50
   3  13  -4   38.40   19.80
   1 -13  -4   20.30   16.70
  -1 -13   4   66.09   17.60
  -1 -13   4   39.80   16.30
  -1  13   4   54.39   18.10
   1  13  -4   48.30   18.70
   1  13  -4   99.49   23.20
   1 -13   4   60.59   17.20
   1 -13   4   24.80   15.50
  -1 -13  -4   20.60   17.40
  -1  13  -4   37.70   20.70
   1  13   4   44.10   18.70
  -1  13  -4   46.00   19.20
  -3 -13  -4   90.19   20.20
   3 -13   4   66.59   18.90
   3 -13   4   64.79   17.60
  -3  13  -4   96.39   20.60
   3  13   4  113.99   22.30
  -3  13  -4   80.69   22.90
  -5 -13  -4   21.60   18.10
   5 -13   4    2.10   15.70
   5 -13   4   50.29   17.60
  -5  13  -4   65.89   19.60
  -5  13  -4   30.60   21.20
   5  13   4   30.70   20.60
   7 -13   4   16.90   16.60
  -7 -13  -4   40.30   19.30
   7 -13   4   37.40   18.50
  -7  13  -4   30.40   21.90
  -7  13  -4   39.80   20.00
   7  13   4    8.60   19.60
   9 -13   4  -16.10   17.40
  -9 -13  -4    2.70   18.30
   9 -13   4  -10.60   16.30
  -9  13  -4   27.30   19.70
  -9  13  -4   18.00   22.70
   9  13   4   16.00   21.40
  -8 -14   4    2.30   19.40
   8 -14  -4   38.40   18.90
   8  14  -4   62.89   21.80
  -6 -14   4   35.00   19.70
   6 -14  -4   23.30   18.50
   6  14  -4   35.60   22.70
   6  14  -4   49.50   20.20
  -4 -14   4   54.99   18.50
   4 -14  -4    7.10   17.70
  -4 -14   4   50.89   16.80
   4  14  -4   58.09   23.60
   4  14  -4   50.49   20.50
  -2 -14   4   47.40   17.10
  -2 -14   4  -21.10   15.10
   2 -14  -4   -1.60   17.70
   2  14  -4   39.90   22.80
   2  14  -4   13.60   19.60
   0 -14  -4   16.60   17.70
   0 -14   4   24.10   17.00
   0 -14   4    0.90   16.00
   0  14  -4    6.40   18.80
   0  14  -4   28.30   21.70
   2 -14   4   69.99   19.20
   2 -14   4   31.80   16.90
  -2 -14  -4   64.39   20.70
   2  14   4   16.30   18.90
  -2  14  -4   61.49   21.20
  -2  14  -4   62.29   24.50
  -4 -14  -4   26.00   19.30
   4 -14   4   32.40   18.30
   4 -14   4   -1.10   16.60
   4  14   4   27.70   19.60
  -4  14  -4   12.50   22.10
  -4  14  -4   -9.20   19.40
 -28   0   5   -0.20   18.20
 -26   0   5    2.60   15.70
  24   0  -5    5.90   16.30
 -24   0   5  -11.40   13.70
  22   0  -5   -4.40   14.00
 -22   0   5   -0.90   11.60
  22   0  -5  -10.10   11.80
  20   0  -5  -17.30   10.50
  20   0  -5   -7.60   11.90
 -20   0   5    5.10   10.10
  18   0  -5    3.30    9.10
 -18   0   5    0.90    8.40
  18   0  -5   -5.60    9.60
  16   0  -5   10.00    8.60
  16   0  -5   -3.70    8.00
 -16   0   5   -9.10    6.50
  14   0  -5    4.00    2.80
  14   0  -5    1.80    6.80
 -14   0   5   -3.30    5.70
  14   0  -5   -2.40    6.50
 -14   0   5    6.40    6.30
  12   0  -5   -4.10    5.40
  12   0  -5    1.60    5.60
 -12   0   5   -2.10    4.90
 -12   0   5   -2.20    4.50
  10   0  -5   -4.70    2.30
 -10   0   5    4.20    4.00
  10   0  -5   -0.80    4.60
 -10   0   5   -3.10    4.00
  10   0  -5   -0.10    4.40
  -8   0   5    2.10    3.50
   8   0  -5   -0.10    2.80
  -8   0   5    5.40    3.20
   8   0  -5   -1.80    3.50
   8   0  -5    5.50    3.60
   6   0  -5    2.80    2.30
  -6   0   5    1.00    3.00
   6   0  -5    2.20    3.40
   6   0  -5    2.50    2.60
  -6   0   5    2.30    2.90
   4   0  -5   -0.10    2.50
  -4   0   5   -0.20    2.50
  -4   0   5   -0.90    2.50
   4   0  -5    3.10    2.20
  -4   0   5    1.10    2.90
  -2   0   5    5.30    2.90
   2   0  -5    4.30    3.10
  -2   0   5    4.00    2.50
  -2   0   5    5.30    3.30
   2   0  -5   -4.20    2.90
   0   0  -5   -4.10    2.80
   0   0   5   -0.90    2.80
   0   0   5   -1.10    2.30
   0   0  -5   -2.50    2.20
   0   0   5    2.00    3.20
   0   0  -5   -3.40    2.90
   2   0   5   -1.50    3.10
  -2   0  -5    1.20    2.60
  -2   0  -5   -5.90    3.20
   2   0   5    0.70    3.40
  -2   0  -5   -3.40    3.30
  -4   0  -5   -7.10    3.50
   4   0   5    0.00    3.70
   4   0   5   -1.90    3.60
  -4   0  -5    3.10    4.00
  -4   0  -5    0.20    3.20
  -6   0  -5    2.30    3.90
  -6   0  -5   -4.30    4.50
   6   0   5    1.70    4.50
   6   0   5   -2.30    4.50
  -6   0  -5   -2.80    4.60
   8   0   5    2.50    5.30
  -8   0  -5    3.90    4.50
  -8   0  -5   -4.50    5.00
   8   0   5    7.30    5.90
  -8   0  -5    5.80    6.10
   8   0   5   -4.90    2.00
 -10   0  -5   14.30    7.30
 -10   0  -5    5.60    6.40
  10   0   5    0.00    6.60
  10   0   5    4.60    6.30
 -12   0  -5    0.40    7.90
  12   0   5  -20.90    6.90
 -12   0  -5    6.10    7.50
  12   0   5   -8.80    6.50
 -14   0  -5   12.60    9.80
 -14   0  -5  -11.50    7.70
  14   0   5   -4.10    9.20
  14   0   5    8.70    8.30
 -16   0  -5   -5.60   11.00
  16   0   5   -8.20    9.20
 -16   0  -5    8.90    9.10
 -18   0  -5    5.50   10.00
 -18   0  -5  -17.70   12.00
  18   0   5   -3.60   10.10
  20   0   5   12.50   11.60
 -20   0  -5  -11.10   15.10
 -20   0  -5   -8.90   10.60
 -22   0  -5    6.00   17.00
 -27  -1   5  -14.50   16.80
 -27   1   5   23.00   18.60
 -25  -1   5   77.99   18.30
  25   1  -5   46.50   21.40
 -25   1   5   62.89   17.60
 -23  -1   5   64.99   16.10
  23  -1  -5   73.69   18.40
  23   1  -5  100.79   20.50
  23   1  -5   88.19   20.60
 -23   1   5   93.99   16.10
  21  -1  -5   -0.60   11.10
  21  -1  -5    9.90   12.60
 -21  -1   5   -7.60   10.30
 -21   1   5   10.50   11.20
  21   1  -5   -5.20   11.90
  21   1  -5   14.00   14.80
 -19  -1   5    8.20    9.40
  19  -1  -5   -8.20    9.20
  19  -1  -5   10.30   10.80
  19   1  -5   -7.30   10.40
  19   1  -5  -10.00   11.30
 -19   1   5    6.00    9.40
  17  -1  -5   91.09   12.70
  17  -1  -5   75.79   11.10
 -17  -1   5   81.19   11.10
  17  -1  -5   82.29    9.10
  17   1  -5  100.09   13.00
 -17   1   5   87.09   10.90
  17   1  -5  103.69   14.00
  15  -1  -5 1191.48   37.10
  15  -1  -5 1233.88   31.40
  15  -1  -5 1184.78   37.50
 -15  -1   5 1216.78   37.50
  15   1  -5 1228.68   37.30
 -15   1   5 1203.48   36.70
  15   1  -5 1239.98   39.70
 -15   1   5 1225.18   38.00
  13  -1  -5  500.45   15.40
  13  -1  -5  504.65   19.90
 -13  -1   5  498.75   19.80
  13  -1  -5  497.05   19.90
  13   1  -5  520.85   20.00
 -13   1   5  532.45   20.20
 -13   1   5  530.15   19.40
  13   1  -5  486.45   21.50
  11  -1  -5 1079.49   29.20
 -11  -1   5 1149.29   34.10
  11  -1  -5 1067.99   31.90
  11  -1  -5 1167.08   32.70
 -11  -1   5 1141.59   32.40
  11   1  -5 1149.69   33.80
  11   1  -5 1146.19   31.90
 -11   1   5 1134.19   32.90
 -11   1   5 1138.49   31.50
  -9  -1   5   98.09    8.60
   9  -1  -5   78.69    7.40
   9  -1  -5   93.49    7.00
  -9  -1   5   74.89    7.00
   9  -1  -5   81.09    7.30
   9   1  -5   91.89    8.40
  -9   1   5   82.79    6.40
  -9   1   5   73.29    7.00
   9   1  -5   84.69    6.90
   7  -1  -5  133.69    8.00
  -7  -1   5  137.49    8.20
  -7  -1   5  130.29    8.30
   7  -1  -5  125.09    7.70
   7  -1  -5  125.99    7.70
  -7   1   5  132.89    8.10
   7   1  -5  127.99    8.40
   7   1  -5  117.59    4.70
  -7   1   5  123.59    6.60
   7   1  -5  133.19    7.00
  -5  -1   5  828.52   23.70
  -5  -1   5  856.41   21.30
   5  -1  -5  844.02   22.70
  -5  -1   5  838.92   24.00
   5  -1  -5  856.41   23.10
   5   1  -5  865.51   21.20
   5   1  -5  868.01   21.30
  -5   1   5  865.01   24.30
  -5   1   5  801.72   21.50
   5   1  -5  835.82   23.60
   3  -1  -5 1312.37   33.60
  -3  -1   5 1337.67   32.90
   3  -1  -5 1332.17   33.60
  -3  -1   5 1360.26   34.40
  -3  -1   5 1304.27   33.90
  -3   1   5 1325.77   31.40
   3   1  -5 1331.37   33.00
  -3   1   5 1361.16   35.20
   3   1  -5 1340.57   33.90
  -1  -1   5  914.21   24.60
   1  -1  -5  911.51   22.90
  -1  -1   5  924.51   24.50
  -1  -1   5  956.80   25.00
   1  -1  -5  928.11   24.90
   1  -1  -5  925.21   24.40
   1   1  -5  899.91   25.70
  -1   1   5  935.71   25.20
  -1   1   5  959.80   26.40
   1   1  -5  944.41   24.90
   1  -1   5  648.14   18.10
  -1  -1  -5  617.64   18.30
   1  -1   5  637.14   18.20
  -1  -1  -5  621.94   18.60
  -1  -1  -5  641.14   17.30
   1  -1   5  635.04   18.60
   1   1   5  627.94   20.20
  -1   1  -5  616.94   18.90
   1   1   5  609.34   18.90
  -1   1  -5  613.74   19.30
  -3  -1  -5  117.79    7.50
  -3  -1  -5  115.29    8.00
   3  -1   5  127.69    7.10
  -3  -1  -5  117.79    7.50
   3  -1   5  125.69    8.10
  -3   1  -5  107.39    8.10
  -3   1  -5  129.69    8.90
   3   1   5  142.29   10.30
  -3   1  -5  108.69    6.20
   3   1   5  129.99    8.30
  -5  -1  -5   83.59    7.60
  -5  -1  -5   96.79    7.60
  -5  -1  -5   78.39    7.30
   5  -1   5   82.19    7.50
   5  -1   5   83.39    6.70
  -5   1  -5   92.19    8.30
   5   1   5   82.59    7.60
   5   1   5   68.09    6.70
  -5   1  -5   96.79    6.80
   5   1   5   92.69    9.70
  -5   1  -5   78.69    7.80
  -7  -1  -5  273.57   13.50
   7  -1   5  273.47   12.50
  -7  -1  -5  293.47   14.70
   7  -1   5  282.77   13.80
  -7  -1  -5  309.97   13.60
  -7   1  -5  293.37   14.30
   7   1   5  288.27   16.60
  -7   1  -5  297.87   12.30
  -7   1  -5  246.38   14.20
   7   1   5  275.37   13.30
   9  -1   5  283.17   14.30
  -9  -1  -5  254.57   14.30
  -9  -1  -5  236.98   13.50
   9  -1   5  236.98   13.00
  -9   1  -5  232.68   15.00
   9   1   5  245.58   13.50
   9   1   5  261.47   17.90
  -9   1  -5  259.67   14.40
  -9   1  -5  251.67   12.90
 -11  -1  -5  871.41   29.30
  11  -1   5  940.81   30.30
  11  -1   5  924.31   29.80
 -11  -1  -5  897.31   30.90
 -11   1  -5  904.11   30.10
  11   1   5  910.01   36.10
  11   1   5  952.10   30.00
 -11   1  -5  880.51   32.00
 -13  -1  -5  416.06   19.90
 -13  -1  -5  415.96   22.00
  13  -1   5  448.06   21.10
  13   1   5  428.56   20.30
  13   1   5  452.65   27.70
 -13   1  -5  437.36   21.10
 -13   1  -5  416.86   23.80
  15  -1   5   22.00   10.00
 -15  -1  -5   36.00   11.30
 -15  -1  -5    6.70    8.90
 -15   1  -5   33.60   11.90
  15   1   5   42.80   10.30
  15   1   5   42.30   14.00
 -15   1  -5   10.20    9.50
  17  -1   5    4.40   10.20
 -17  -1  -5   27.40   10.30
 -17  -1  -5   15.50   12.30
  17   1   5   14.00    9.90
 -17   1  -5    8.00   10.00
 -17   1  -5   28.70   13.80
 -19  -1  -5   28.20   11.40
 -19  -1  -5   31.90   14.90
  19  -1   5   38.60   12.20
 -19   1  -5   23.40   15.90
 -19   1  -5   23.80   12.20
  19   1   5   42.40   12.30
  21  -1   5   48.90   14.40
 -21  -1  -5   42.50   18.00
 -21   1  -5   41.40   18.60
 -21   1  -5   34.50   13.70
 -23  -1  -5   22.80   19.40
 -23   1  -5   22.80   20.90
 -28  -2   5    9.20   19.20
 -28   2   5   -3.70   17.40
  28   2  -5   -6.10   31.90
 -26  -2   5   36.50   17.80
  26   2  -5    0.10   22.10
 -26   2   5   12.70   16.50
 -24  -2   5   33.50   16.20
  24   2  -5   35.50   21.00
 -24   2   5   29.70   15.10
 -22  -2   5   34.70   14.00
  22   2  -5   32.10   17.70
  22   2  -5   56.19   15.00
 -22   2   5   66.19   14.80
  20  -2  -5    3.60   10.90
 -20  -2   5    3.90   10.50
  20  -2  -5   14.60   12.00
  20   2  -5   24.40   14.80
 -20   2   5   16.50   11.50
  20   2  -5    9.30   11.60
 -18  -2   5  105.69   13.00
  18  -2  -5  119.79   14.40
  18  -2  -5  105.69   13.10
  18  -2  -5  131.79   14.20
  18   2  -5  147.29   15.80
 -18   2   5  144.09   14.20
  18   2  -5  109.69   16.70
  16  -2  -5 1275.17   39.80
 -16  -2   5 1286.27   39.70
  16  -2  -5 1235.48   34.00
  16  -2  -5 1271.17   39.10
 -16   2   5 1255.47   39.20
 -16   2   5 1299.87   39.30
  16   2  -5 1250.47   39.10
  16   2  -5 1256.97   43.30
  14  -2  -5 1907.91   51.89
  14  -2  -5 1901.71   48.50
 -14  -2   5 1968.80   52.89
  14  -2  -5 1934.81   52.69
  14   2  -5 1874.71   51.69
 -14   2   5 1902.31   52.29
 -14   2   5 1902.81   51.49
  14   2  -5 1919.51   55.59
  12  -2  -5 3559.14   85.69
  12  -2  -5 3603.84   88.09
 -12  -2   5 3534.25   88.39
  12  -2  -5 3601.74   87.39
 -12   2   5 3469.35   86.59
  12   2  -5 3555.94   86.99
  12   2  -5 3642.14   90.69
 -12   2   5 3537.35   87.89
  10  -2  -5  631.54   21.30
 -10  -2   5  697.63   22.70
  10  -2  -5  694.03   22.30
  10  -2  -5  686.43   21.60
 -10  -2   5  689.83   23.80
  10   2  -5  710.73   24.00
 -10   2   5  671.33   21.80
  10   2  -5  659.93   21.00
 -10   2   5  659.73   20.50
  -8  -2   5 1433.96   39.10
   8  -2  -5 1460.35   38.40
  -8  -2   5 1459.45   39.80
   8  -2  -5 1384.76   38.60
  -8   2   5 1420.36   38.40
   8   2  -5 1470.95   39.40
  -8   2   5 1428.96   36.10
   8   2  -5 1464.65   36.80
  -6  -2   5  356.66   13.80
  -6  -2   5  356.16   14.20
   6  -2  -5  346.27   13.80
  -6  -2   5  360.66   10.10
   6  -2  -5  366.36   13.70
  -6   2   5  353.06   13.70
  -6   2   5  342.37   10.40
   6   2  -5  369.86   11.30
   6   2  -5  356.26   13.60
   4  -2  -5   86.29    7.10
   4  -2  -5   94.19    7.20
  -4  -2   5   98.59    6.90
  -4  -2   5  108.89    7.60
  -4  -2   5  102.19    5.40
   4   2  -5   91.39    6.80
  -4   2   5  101.09    7.80
  -2  -2   5  635.24   19.30
  -2  -2   5  626.54   18.30
   2  -2  -5  632.44   18.80
  -2  -2   5  650.63   17.80
  -2   2   5  614.74   20.90
  -2   2   5  645.14   20.40
   2   2  -5  619.54   18.00
   0  -2   5  921.01   25.40
   0  -2   5  906.81   23.90
   0  -2  -5  903.01   25.20
   0  -2   5  932.91   24.70
   0  -2  -5  921.71   25.50
   0  -2  -5  880.01   22.20
   0   2  -5  895.21   26.80
   0   2   5  910.01   27.40
   0   2  -5  917.61   23.60
   0   2   5  873.41   25.40
   2  -2   5    1.70    3.70
  -2  -2  -5   -1.70    3.50
   2  -2   5    3.80    3.60
  -2  -2  -5   -1.70    3.60
   2  -2   5    5.30    2.90
  -2  -2  -5    5.70    3.00
  -2   2  -5    6.80    4.70
   2   2   5    1.60    4.50
   2   2   5    1.80    2.40
   2   2   5   -1.80    3.70
  -2   2  -5    2.80    2.30
  -4  -2  -5  564.44   18.70
  -4  -2  -5  572.54   19.10
   4  -2   5  549.95   18.70
   4  -2   5  538.45   15.90
  -4  -2  -5  578.14   17.60
   4   2   5  589.34   22.40
  -4   2  -5  559.54   20.20
   4   2   5  546.55   19.00
  -4   2  -5  562.74   16.70
   6  -2   5  969.30   29.10
   6  -2   5  973.90   26.10
  -6  -2  -5 1002.80   28.50
  -6  -2  -5  997.60   29.10
   6   2   5  987.30   29.00
  -6   2  -5  997.80   27.60
  -6   2  -5  987.50   30.70
   6   2   5 1013.30   34.60
   6   2   5 1008.50   29.50
  -8  -2  -5 1540.85   42.00
   8  -2   5 1440.56   38.90
  -8  -2  -5 1561.24   42.10
   8  -2   5 1522.35   42.10
  -8   2  -5 1464.65   43.90
   8   2   5 1544.95   42.50
   8   2   5 1603.54   42.80
   8   2   5 1571.64   49.80
  -8   2  -5 1543.35   41.10
  10  -2   5 1184.18   35.50
 -10  -2  -5 1173.58   35.90
  10  -2   5 1118.89   32.50
 -10  -2  -5 1232.78   35.40
 -10   2  -5 1208.08   38.20
  10   2   5 1212.08   35.90
  10   2   5 1206.28   44.20
  12  -2   5 1119.29   35.60
 -12  -2  -5 1174.88   34.90
 -12  -2  -5 1110.69   36.30
 -12   2  -5 1050.29   35.60
  12   2   5 1065.99   35.00
 -12   2  -5 1192.08   39.00
  12   2   5 1090.89   45.20
  14  -2   5  197.88   15.40
 -14  -2  -5  232.88   16.60
 -14  -2  -5  197.28   16.70
  14   2   5  216.98   15.80
  14   2   5  224.08   24.10
 -14   2  -5  201.28   16.50
 -14   2  -5  239.68   19.30
 -16  -2  -5   39.30   12.80
 -16  -2  -5   47.70   10.70
  16  -2   5   35.00   11.00
  16   2   5   15.40   15.40
  16   2   5   42.90   11.20
 -16   2  -5   54.49   14.60
 -16   2  -5   51.49   11.90
 -18  -2  -5   13.80   10.60
  18  -2   5    2.40   10.80
 -18  -2  -5   34.90   14.00
 -18   2  -5   14.80   14.60
 -18   2  -5   29.70   11.70
  18   2   5   20.80   11.00
  18   2   5   -5.00   15.90
 -20  -2  -5  -25.00   14.10
  20  -2   5    2.70   11.90
 -20   2  -5    7.50   11.50
 -20   2  -5    7.20   17.20
 -22  -2  -5    9.40   17.10
  22  -2   5   30.00   14.60
 -22   2  -5    3.40   19.70
 -27  -3   5   -3.80   18.30
  27   3  -5   10.70   26.30
 -27   3   5    5.50   18.00
 -25  -3   5   -6.10   16.10
 -25   3   5  -15.80   14.60
  25   3  -5   -2.20   21.90
 -23  -3   5    8.90   14.30
 -23   3   5   32.10   14.80
  23   3  -5   40.00   15.40
  23   3  -5    8.60   18.60
 -21  -3   5   38.20   13.90
 -21   3   5   49.10   13.80
  21   3  -5   64.39   14.90
  21   3  -5   37.70   18.10
 -19  -3   5  138.19   15.60
  19  -3  -5  158.68   15.90
  19  -3  -5  131.49   16.10
  19   3  -5  177.08   22.20
 -19   3   5  169.98   16.20
  19   3  -5  166.28   17.40
  17  -3  -5  251.67   17.20
  17  -3  -5  235.08   14.00
 -17  -3   5  270.47   18.70
  17  -3  -5  234.68   17.20
  17   3  -5  270.37   23.00
 -17   3   5  259.57   18.30
 -17   3   5  229.98   15.80
  17   3  -5  258.37   19.10
  15  -3  -5  313.37   15.50
  15  -3  -5  330.17   16.90
  15  -3  -5  315.97   19.10
 -15  -3   5  323.77   18.70
 -15   3   5  335.07   17.60
  15   3  -5  346.57   22.30
  15   3  -5  356.56   18.70
 -15   3   5  308.17   16.50
 -13  -3   5  478.65   20.70
  13  -3  -5  450.85   18.80
  13  -3  -5  484.95   18.70
  13  -3  -5  489.75   20.90
  13   3  -5  473.05   20.00
  13   3  -5  503.55   23.10
 -13   3   5  487.65   19.20
 -13   3   5  496.75   19.10
  11  -3  -5  747.23   23.70
  11  -3  -5  748.53   25.50
  11  -3  -5  731.53   24.80
 -11  -3   5  755.92   26.00
  11   3  -5  755.22   24.20
 -11   3   5  772.32   24.30
 -11   3   5  728.83   23.20
  11   3  -5  771.02   27.90
   9  -3  -5  348.47   15.50
   9  -3  -5  312.87   15.50
  -9  -3   5  329.77   15.60
  -9   3   5  350.06   12.80
   9   3  -5  349.57   16.60
  -9   3   5  335.07   14.00
   9   3  -5  357.86   13.90
  -7  -3   5 1246.88   36.20
   7  -3  -5 1241.18   36.40
  -7  -3   5 1256.17   30.70
   7  -3  -5 1261.67   35.70
   7   3  -5 1311.07   36.20
   7   3  -5 1290.77   32.90
  -7   3   5 1281.57   31.80
  -7   3   5 1271.97   35.10
  -5  -3   5  131.89    8.90
  -5  -3   5  127.29    6.10
  -5  -3   5  124.89    9.50
   5  -3  -5  136.39   10.00
   5  -3  -5  136.49   10.00
   5   3  -5  137.49    9.00
   5   3  -5  136.79    6.90
  -5   3   5  122.59    9.20
  -3  -3   5   77.69    7.30
  -3  -3   5   63.59    5.90
  -3  -3   5   67.89    5.10
   3  -3  -5   54.19    6.30
  -3   3   5   59.39    6.90
  -3   3   5   53.39    5.90
   3   3  -5   60.39    5.80
  -1  -3   5  183.88    8.40
   1  -3  -5  182.48    9.90
  -1  -3   5  190.58   10.10
  -1  -3   5  171.38    8.60
  -1   3   5  182.48   11.50
   1   3  -5  182.88    8.20
   1   3  -5  204.08   11.80
  -1   3   5  192.68   10.10
  -1  -3  -5   92.49    5.50
   1  -3   5   99.59    5.90
  -1  -3  -5  102.49    8.00
   1  -3   5   99.89    7.30
   1  -3   5  115.99    8.60
   1   3   5  103.69    9.80
  -1   3  -5  108.39    5.50
   1   3   5  101.39    8.20
  -1   3  -5   89.49    5.60
  -1   3  -5   90.99    8.80
  -3  -3  -5  208.78    9.30
  -3  -3  -5  227.98   11.70
   3  -3   5  208.08   11.00
   3  -3   5  224.48    7.90
   3  -3   5  229.18   11.70
  -3   3  -5  218.08    7.60
  -3   3  -5  243.38   13.40
   3   3   5  180.38   14.00
   3   3   5  224.08   11.70
  -3   3  -5  205.98    8.80
   5  -3   5  472.45   18.00
  -5  -3  -5  541.15   18.60
   5  -3   5  500.55   13.90
  -5  -3  -5  522.05   17.20
  -5   3  -5  484.75   20.30
  -5   3  -5  519.65   16.50
   5   3   5  500.45   18.70
   5   3   5  476.05   23.40
   7  -3   5  339.77   10.60
   7  -3   5  335.77   15.80
  -7  -3  -5  327.37   14.90
  -7  -3  -5  345.57   15.60
  -7   3  -5  348.57   18.00
   7   3   5  366.56   22.80
  -7   3  -5  367.86   14.10
   7   3   5  336.17   16.20
  -9  -3  -5  461.95   19.30
  -9  -3  -5  477.35   19.30
   9  -3   5  441.86   19.20
  -9   3  -5  442.56   21.60
   9   3   5  454.85   19.70
   9   3   5  436.06   26.80
 -11  -3  -5  606.54   23.20
 -11  -3  -5  615.64   24.60
  11  -3   5  565.54   23.80
 -11   3  -5  592.94   26.90
  11   3   5  572.74   33.00
  11   3   5  631.04   24.20
 -13  -3  -5  391.66   19.60
 -13  -3  -5  376.76   21.10
  13  -3   5  373.06   20.20
  13   3   5  388.16   20.30
  13   3   5  415.86   30.90
 -13   3  -5  374.46   23.80
 -15  -3  -5   92.89   12.10
  15  -3   5   71.89   12.70
 -15  -3  -5   79.99   14.00
  15   3   5   97.39   21.10
 -15   3  -5   71.59   15.40
  15   3   5  104.09   13.10
 -17  -3  -5   21.00   10.80
 -17  -3  -5   38.90   13.80
  17  -3   5   39.70   12.20
  17   3   5   47.80   12.10
 -17   3  -5   16.20   15.10
  17   3   5   25.30   18.20
 -17   3  -5   35.40   12.40
  19  -3   5  -14.50   11.40
 -19  -3  -5    2.60   14.60
 -19   3  -5   -7.40   16.00
 -19   3  -5  -13.90   10.80
  19   3   5  -19.60   17.00
  21  -3   5   11.20   13.80
 -21  -3  -5   20.90   17.10
 -21   3  -5   17.10   19.20
 -21   3  -5    5.50   13.40
 -23  -3  -5  -25.50   18.00
 -23   3  -5  -19.40   20.30
 -26  -4   5  216.98   25.80
 -26   4   5  208.68   25.20
  26   4  -5  210.88   37.20
 -24  -4   5  237.68   24.70
  24   4  -5  209.08   32.00
 -24   4   5  243.48   23.30
 -22  -4   5  228.88   22.10
  22   4  -5  216.58   29.60
  22   4  -5  169.98   20.30
 -22   4   5  206.68   20.90
 -20  -4   5   30.00   13.30
  20   4  -5   -6.40   12.20
  20   4  -5   25.50   16.80
 -20   4   5    8.30   12.00
 -18  -4   5   43.70   11.90
  18  -4  -5   18.70    8.50
  18  -4  -5   25.10   10.00
  18  -4  -5   12.70   11.10
  18   4  -5   38.50   15.40
 -18   4   5   11.00    8.10
  18   4  -5   20.60   11.10
 -18   4   5   15.50   10.40
 -16  -4   5   19.60    9.10
  16  -4  -5    8.60    8.00
  16  -4  -5    6.50    9.50
  16  -4  -5    0.90    7.30
 -16   4   5   12.70    7.00
 -16   4   5    4.40    8.50
  16   4  -5   28.80   12.90
  16   4  -5   16.00   10.00
 -14  -4   5   -0.40    7.40
  14  -4  -5   -2.80    6.40
  14  -4  -5    5.20    6.20
  14  -4  -5    1.40    8.40
  14   4  -5    3.00    9.90
 -14   4   5   10.10    7.40
 -14   4   5    0.80    5.60
  14   4  -5   -9.90    7.20
  12  -4  -5   -4.70    5.40
 -12  -4   5    0.20    6.40
  12  -4  -5    2.80    6.50
  12  -4  -5   -6.50    6.30
 -12   4   5   -4.10    4.90
  12   4  -5   10.20    6.70
  12   4  -5    0.20    8.20
 -12   4   5    2.80    5.90
 -10  -4   5    2.50    2.50
  10  -4  -5    1.00    6.20
  10  -4  -5   -3.40    6.10
 -10  -4   5    1.30    6.10
 -10   4   5   -1.30    4.80
 -10   4   5    2.20    4.70
  10   4  -5   14.30    6.30
  10   4  -5    2.00    6.80
  -8  -4   5  910.01   24.60
  -8  -4   5  999.60   30.90
   8  -4  -5  978.50   31.60
   8  -4  -5  972.50   30.50
   8   4  -5  975.20   27.70
  -8   4   5  959.70   28.80
  -8   4   5  960.20   26.20
   8   4  -5  921.61   30.70
  -6  -4   5  806.52   22.90
  -6  -4   5  843.22   27.70
   6  -4  -5  868.61   28.70
   6  -4  -5  856.41   27.90
   6   4  -5  851.41   24.40
  -6   4   5  846.42   22.40
  -6   4   5  882.61   26.90
   6   4  -5  872.11   27.50
   4  -4  -5  513.45   20.10
  -4  -4   5  524.75   19.60
   4  -4  -5  517.25   20.10
  -4  -4   5  504.75   16.10
   4   4  -5  542.55   18.60
   4   4  -5  498.95   16.30
  -4   4   5  525.05   19.60
  -4   4   5  497.75   18.60
  -2  -4   5 1003.20   29.60
   2  -4  -5  963.20   29.50
  -2  -4   5  946.71   27.10
   2   4  -5  943.21   26.00
  -2   4   5 1008.40   31.10
   2   4  -5  979.60   26.40
   2   4  -5  977.60   27.50
  -2   4   5 1003.50   29.60
   0  -4   5  596.84   19.60
   0  -4  -5  611.74   16.90
   0  -4  -5  641.94   21.00
   0  -4   5  609.24   21.00
   0   4  -5  636.54   23.20
   0   4   5  585.84   21.40
   0   4  -5  590.64   17.90
   0   4   5  596.94   23.50
   0   4  -5  620.94   18.20
   2  -4   5  931.11   24.80
   2  -4   5  971.60   29.10
  -2  -4  -5  955.10   25.60
   2  -4   5  997.40   28.60
  -2  -4  -5  962.60   28.90
  -2   4  -5  952.60   26.10
   2   4   5  977.00   30.00
   2   4   5  925.81   33.00
  -2   4  -5  948.81   31.10
  -2   4  -5  974.20   24.80
   4  -4   5  228.68   12.80
  -4  -4  -5  227.48   10.90
   4  -4   5  212.18   13.00
  -4  -4  -5  219.08   12.60
   4   4   5  262.97   18.30
  -4   4  -5  225.88   14.80
  -4   4  -5  222.88   10.30
   4   4   5  215.18   13.40
  -6  -4  -5  285.87   13.30
   6  -4   5  257.87   14.30
  -6  -4  -5  270.17   14.60
  -6   4  -5  273.87   16.80
  -6   4  -5  259.77   12.20
   6   4   5  294.57   15.30
   6   4   5  234.48   20.40
  -8  -4  -5   41.70    8.00
  -8  -4  -5   38.70    7.70
   8  -4   5   32.20    7.70
  -8   4  -5   41.70    9.60
   8   4   5   29.40   11.90
 -10  -4  -5   30.10    8.70
  10  -4   5   29.20    8.70
 -10  -4  -5   12.80    7.70
  10   4   5    3.80   12.70
 -10   4  -5    9.00    9.50
 -12  -4  -5  103.39   11.80
  12  -4   5   90.69   12.30
 -12  -4  -5  121.69   13.30
  12   4   5  108.89   21.00
 -12   4  -5  100.59   14.90
 -14  -4  -5  130.49   13.60
  14  -4   5  142.99   15.10
 -14  -4  -5  118.79   14.80
  14   4   5   92.69   21.70
 -14   4  -5  119.69   16.90
  16  -4   5   97.09   14.60
 -16  -4  -5   85.39   13.10
 -16  -4  -5   80.19   15.20
 -16   4  -5   67.39   17.20
  16   4   5   87.89   22.30
  18  -4   5  106.49   16.40
 -18  -4  -5   64.29   16.60
  18   4   5  158.78   29.20
 -18   4  -5  107.59   20.80
 -20  -4  -5  338.27   27.40
  20  -4   5  285.17   23.30
  20   4   5  327.17   39.10
 -20   4  -5  330.57   25.40
 -20   4  -5  313.57   29.70
 -22  -4  -5  188.18   24.30
  22  -4   5  126.49   19.20
 -22   4  -5  194.78   28.00
 -22   4  -5  135.49   19.30
 -27  -5   5  179.58   26.70
 -27   5   5  133.79   24.00
  27   5  -5  127.19   34.70
 -25  -5   5  325.47   29.30
  25   5  -5  328.57   40.10
 -25   5   5  331.57   27.60
 -23  -5   5  542.55   35.10
  23   5  -5  441.26   41.60
  23   5  -5  508.95   33.70
 -23   5   5  494.65   31.40
 -21  -5   5  367.26   26.60
  21   5  -5  367.26   27.90
  21   5  -5  412.96   37.10
 -21   5   5  370.26   26.90
  19  -5  -5   88.89   12.20
 -19  -5   5   57.29   14.20
  19   5  -5   40.30   14.00
 -19   5   5   62.89   13.80
  19   5  -5   65.79   19.70
 -17  -5   5   -2.70   10.00
  17  -5  -5   -4.20    8.60
  17  -5  -5   -5.00   10.10
 -17   5   5    3.50    7.90
  17   5  -5   -0.50   13.70
  17   5  -5   -2.80   10.00
 -17   5   5    9.70   10.10
  15  -5  -5   41.00    8.70
 -15  -5   5   35.30   10.70
  15  -5  -5   38.30   10.70
  15  -5  -5   43.60    9.90
 -15   5   5   48.20   10.10
 -15   5   5   45.80    8.50
  15   5  -5   48.70   11.50
  15   5  -5   70.09   14.80
 -13  -5   5  330.97   19.60
  13  -5  -5  348.57   16.50
  13  -5  -5  392.66   19.60
  13  -5  -5  362.06   20.70
 -13   5   5  345.37   17.90
 -13   5   5  339.17   16.50
  13   5  -5  346.27   23.30
  13   5  -5  320.07   18.80
 -11  -5   5   37.20    8.80
  11  -5  -5   36.30    9.40
 -11  -5   5   38.30    5.30
  11  -5  -5   49.10    9.90
  11   5  -5   31.20   10.40
 -11   5   5   39.60    7.50
 -11   5   5   56.29    7.90
  11   5  -5   53.69    8.70
   9  -5  -5  842.12   29.60
  -9  -5   5  810.02   24.30
   9  -5  -5  795.12   30.00
  -9  -5   5  894.31   30.00
   9   5  -5  906.51   32.10
   9   5  -5  894.01   27.60
  -9   5   5  865.21   27.40
  -9   5   5  844.42   25.50
   7  -5  -5  695.43   26.30
   7  -5  -5  729.83   27.00
  -7  -5   5  703.23   25.90
  -7  -5   5  680.53   21.30
   7   5  -5  721.13   26.60
   7   5  -5  680.73   23.00
  -7   5   5  691.53   20.80
  -7   5   5  713.53   24.20
  -5  -5   5 1380.86   37.30
   5  -5  -5 1392.46   42.20
   5  -5  -5 1473.85   42.00
  -5  -5   5 1400.06   41.00
  -5   5   5 1383.16   40.20
  -5   5   5 1358.06   35.30
   5   5  -5 1342.07   40.30
   5   5  -5 1452.05   38.00
   3  -5  -5 3145.29   74.69
  -3  -5   5 3227.98   80.99
   3  -5  -5 3284.97   82.29
  -3  -5   5 3183.88   78.39
  -3   5   5 3161.38   75.49
   3   5  -5 3207.48   79.59
  -3   5   5 3215.88   80.99
   3   5  -5 3212.38   77.89
  -3   5   5 3202.48   82.09
   1  -5  -5  906.71   24.00
   1  -5  -5  868.21   29.50
  -1  -5   5  921.01   29.10
  -1  -5   5  925.31   27.60
   1   5  -5  899.81   25.90
   1   5  -5  881.41   26.10
  -1   5   5  907.91   29.50
   1   5  -5  942.81   31.70
   1   5  -5  892.91   26.80
  -1   5   5  930.91   31.60
  -1  -5  -5 2211.38   53.79
   1  -5   5 2170.88   56.99
  -1  -5  -5 2221.18   58.09
   1  -5   5 2227.08   57.89
  -1   5  -5 2175.28   55.09
   1   5   5 2210.38   62.49
  -1   5  -5 2139.19   60.19
   1   5   5 2176.58   59.09
  -1   5  -5 2190.88   54.39
   3  -5   5 1166.48   34.40
  -3  -5  -5 1103.79   30.80
  -3  -5  -5 1131.59   33.80
   3  -5   5 1150.08   33.70
   3   5   5 1119.79   40.10
   3   5   5 1076.09   34.80
  -3   5  -5 1088.79   28.90
  -3   5  -5 1118.69   36.30
  -3   5  -5 1108.99   31.30
   5  -5   5  188.98   13.80
  -5  -5  -5  203.58   14.00
  -5  -5  -5  193.38   11.70
   5  -5   5  183.18   13.30
   5   5   5  189.38   14.30
  -5   5  -5  194.48   15.30
   5   5   5  199.58   19.80
  -5   5  -5  179.38   10.60
   7  -5   5   -1.20    6.90
  -7  -5  -5   -3.60    6.10
  -7  -5  -5   -2.30    6.40
   7   5   5   16.30   11.90
  -7   5  -5    5.00    7.70
   7   5   5   -7.20    9.80
   9  -5   5    7.70    7.90
  -9  -5  -5    5.70    7.70
  -9  -5  -5   10.50    7.50
   9   5   5  -12.90   11.20
  -9   5  -5    0.80    8.90
 -11  -5  -5   25.70    9.60
  11  -5   5   24.60    9.60
 -11  -5  -5   41.70    9.50
 -11   5  -5    1.30   10.50
  11   5   5   48.60   17.40
  13  -5   5  124.19   14.50
 -13  -5  -5  107.29   13.30
 -13  -5  -5  113.19   14.50
  13   5   5  101.59   22.20
 -13   5  -5  102.09   16.60
 -15  -5  -5   56.89   13.80
 -15  -5  -5   36.20   11.40
  15  -5   5   37.90   12.90
  15   5   5   44.00   20.30
 -15   5  -5   66.29   16.80
 -17  -5  -5  106.79   17.50
  17  -5   5  118.69   16.80
 -17  -5  -5  123.39   20.60
 -17   5  -5   78.49   19.60
  17   5   5  154.98   28.80
  19  -5   5  232.48   21.50
 -19  -5  -5  321.57   26.00
  19   5   5  308.77   39.80
 -19   5  -5  259.37   28.00
  21  -5   5  276.67   24.60
 -21  -5  -5  381.46   30.60
  21   5   5  426.06   44.80
 -21   5  -5  436.26   35.30
 -26  -6   5  142.79   24.80
 -26   6   5  105.09   22.40
  26   6  -5  102.29   33.30
 -24  -6   5  199.18   25.80
 -24   6   5  149.69   22.10
  24   6  -5  196.28   35.30
 -22  -6   5  445.46   30.90
  22   6  -5  412.26   29.90
 -22   6   5  439.36   31.10
  22   6  -5  361.06   38.20
 -20  -6   5   57.29   16.30
  20  -6  -5   60.99   13.10
 -20   6   5   36.20   14.50
  20   6  -5   39.40   15.30
  20   6  -5   27.70   20.60
  18  -6  -5   69.99   13.10
 -18  -6   5   65.59   15.30
  18   6  -5   96.69   21.40
 -18   6   5   53.89   13.50
  18   6  -5   75.69   14.70
 -16  -6   5   11.70   10.90
  16  -6  -5   11.40    9.90
  16   6  -5   12.20   11.70
  16   6  -5   27.40   15.20
 -16   6   5   10.20   10.70
  14  -6  -5   -1.10   10.40
  14  -6  -5    4.10    7.30
  14  -6  -5   -4.70    8.70
 -14  -6   5   11.80    9.70
 -14   6   5    8.10    8.90
  14   6  -5    3.90    9.70
 -14   6   5   -3.40    6.50
  14   6  -5    2.60   12.60
  12  -6  -5   14.90    9.90
 -12  -6   5    8.90    8.50
  12  -6  -5   22.50    9.30
 -12   6   5    6.50    6.60
 -12   6   5    7.20    7.90
  12   6  -5   11.80    8.70
  12   6  -5   18.10   12.30
 -10  -6   5  279.97   14.50
  10  -6  -5  349.77   20.20
 -10  -6   5  349.07   19.70
  10  -6  -5  338.37   20.40
 -10   6   5  348.87   16.70
  10   6  -5  311.67   22.20
  10   6  -5  312.67   17.80
 -10   6   5  327.77   15.90
  -8  -6   5  372.36   19.70
   8  -6  -5  393.46   21.30
   8  -6  -5  363.06   20.30
  -8  -6   5  321.77   15.40
   8   6  -5  338.87   17.50
  -8   6   5  382.56   17.40
   8   6  -5  360.96   21.70
  -8   6   5  352.96   15.00
   6  -6  -5  345.47   19.70
  -6  -6   5  331.37   15.50
  -6  -6   5  323.07   18.10
   6  -6  -5  344.97   20.00
   6   6  -5  339.77   19.50
   6   6  -5  323.87   16.10
  -6   6   5  349.37   13.90
  -6   6   5  335.57   16.60
  -4  -6   5 1373.16   39.40
   4  -6  -5 1346.57   42.90
  -4  -6   5 1361.36   41.50
   4  -6  -5 1323.47   34.90
  -4   6   5 1366.36   41.30
   4   6  -5 1454.65   41.90
  -4   6   5 1379.16   36.20
  -4   6   5 1408.36   42.10
   4   6  -5 1389.16   39.00
  -2  -6   5 1140.89   34.20
  -2  -6   5 1084.19   35.30
   2  -6  -5 1191.88   37.20
   2  -6  -5 1131.39   29.80
  -2   6   5 1108.59   30.90
   2   6  -5 1092.99   32.40
   2   6  -5 1149.48   38.00
   2   6  -5 1120.19   33.10
  -2   6   5 1137.09   37.30
   2   6  -5 1147.19   34.70
  -2   6   5 1097.99   35.50
   0  -6   5  411.56   18.90
   0  -6   5  378.96   17.70
   0  -6  -5  402.06   20.00
   0  -6  -5  408.36   14.70
   0   6  -5  408.46   16.40
   0   6  -5  406.76   16.40
   0   6   5  391.06   21.70
   0   6   5  381.56   19.40
   0   6  -5  412.26   21.40
   0   6  -5  414.96   17.60
  -2  -6  -5  727.43   22.90
  -2  -6  -5  724.03   27.20
   2  -6   5  761.22   26.90
   2  -6   5  767.12   26.90
   2   6   5  725.63   31.20
   2   6   5  701.53   27.40
  -2   6  -5  727.73   24.00
  -2   6  -5  765.52   29.40
  -2   6  -5  767.32   24.50
   4  -6   5  391.46   19.30
  -4  -6  -5  375.26   16.50
   4  -6   5  397.36   19.00
  -4  -6  -5  388.06   19.30
  -4   6  -5  404.16   21.40
  -4   6  -5  386.46   17.80
   4   6   5  355.86   24.20
   4   6   5  358.66   19.60
   6  -6   5   95.39   11.70
   6  -6   5   97.49   11.20
  -6  -6  -5  117.79   11.80
  -6  -6  -5  104.99   10.20
   6   6   5  114.59   17.20
  -6   6  -5   99.59   13.20
  -8  -6  -5   96.19   11.70
  -8  -6  -5   50.59    9.50
   8  -6   5   60.49   11.00
   8   6   5   63.09   16.30
  -8   6  -5   63.19   12.60
  10  -6   5   -8.00    9.10
 -10  -6  -5   19.60    9.30
 -10  -6  -5    7.80    9.30
  10   6   5    2.90   13.60
 -10   6  -5   22.90   12.30
 -12  -6  -5   22.80   10.90
  12  -6   5   21.60   11.30
 -12  -6  -5   29.80   10.50
  12   6   5   14.60   16.70
 -12   6  -5    0.50   12.10
  14  -6   5   48.00   13.40
 -14  -6  -5   20.90   12.80
 -14  -6  -5   38.00   11.30
  14   6   5   38.40   19.50
 -14   6  -5   15.50   14.90
 -16  -6  -5  166.88   17.00
  16  -6   5  137.99   18.10
 -16  -6  -5  210.68   20.50
  16   6   5  187.58   31.30
 -16   6  -5  165.28   23.10
  18  -6   5  126.19   18.70
 -18  -6  -5  137.19   19.70
  18   6   5  130.89   30.20
 -18   6  -5  131.59   24.20
  20  -6   5  122.39   19.40
 -20  -6  -5  149.69   22.60
  20   6   5  162.68   33.10
 -20   6  -5  162.38   27.40
 -25  -7   5    6.70   21.00
  25   7  -5    4.80   26.60
 -25   7   5  -23.60   17.40
 -23  -7   5   34.80   19.90
 -23   7   5    9.00   16.20
  23   7  -5   -6.90   24.40
  23   7  -5  -17.10   16.80
 -21  -7   5   25.50   17.80
  21  -7  -5    1.60   12.60
  21   7  -5   26.40   23.60
  21   7  -5    0.70   16.00
 -21   7   5    6.60   15.20
  19  -7  -5   61.89   14.60
 -19  -7   5   65.89   17.10
  19   7  -5   42.60   21.10
 -19   7   5   39.30   15.00
  19   7  -5   41.50   16.20
  17  -7  -5  137.09   16.50
 -17  -7   5  123.99   17.70
  17   7  -5  129.09   24.20
  17   7  -5  153.98   18.40
 -17   7   5  119.29   16.20
 -15  -7   5   18.70   12.30
  15  -7  -5   51.79   13.10
  15   7  -5  -15.90   14.90
  15   7  -5   25.40   12.80
 -15   7   5   13.40   10.50
 -13  -7   5  178.98   16.60
  13  -7  -5  173.78   17.00
  13  -7  -5  132.59   19.00
  13   7  -5  142.79   15.70
  13   7  -5  179.88   22.20
 -13   7   5  176.48   14.90
 -13   7   5  157.58   13.10
 -11  -7   5   34.60   10.40
  11  -7  -5   36.20   11.80
  11  -7  -5   45.70   12.30
 -11   7   5   20.20    7.90
  11   7  -5   31.30   14.00
 -11   7   5   30.40    8.90
  11   7  -5   34.60   10.50
   9  -7  -5  285.77   20.60
  -9  -7   5  311.67   20.00
  -9  -7   5  274.77   16.30
   9  -7  -5  316.27   21.20
   9   7  -5  262.97   18.20
  -9   7   5  282.17   16.20
   9   7  -5  266.07   22.30
  -9   7   5  275.17   15.90
   7  -7  -5   13.60    9.50
   7  -7  -5   24.20   10.20
  -7  -7   5   12.00    8.20
  -7  -7   5   12.60    7.30
   7   7  -5   18.00    8.40
  -7   7   5   36.10    8.40
   7   7  -5   10.40   11.30
  -7   7   5   19.90    6.40
  -5  -7   5   45.80   10.00
  -5  -7   5   33.60    8.40
   5  -7  -5   37.30   10.50
   5  -7  -5   35.60    5.90
   5   7  -5   28.40    8.20
  -5   7   5   17.90    7.90
  -5   7   5   33.50    6.90
  -5   7   5   33.50    8.90
   5   7  -5   29.60   10.90
   3  -7  -5   -3.70    7.90
  -3  -7   5   -1.30    7.20
   3  -7  -5    8.30    4.90
  -3  -7   5    2.20    6.80
   3   7  -5   14.30    7.10
  -3   7   5   14.20    8.70
  -3   7   5    5.60    7.70
   3   7  -5   12.80    9.60
  -3   7   5   10.30    5.60
   3   7  -5   -2.90    6.40
  -1  -7   5   10.40    7.60
   1  -7  -5   18.50    8.80
  -1  -7   5   15.90    7.80
   1  -7  -5   18.40    5.60
   1   7  -5   16.90    7.00
  -1   7   5    9.30    7.80
   1   7  -5   16.30    9.60
  -1   7   5   14.80    9.20
   1   7  -5    4.50    7.00
   1   7  -5   27.70   10.00
   1  -7   5   46.80    9.70
  -1  -7  -5   57.29   10.70
  -1  -7  -5   40.40    7.10
   1  -7   5   37.00    8.90
  -1   7  -5   53.69   11.50
  -1   7  -5   41.40    7.90
   1   7   5   49.20   11.50
  -1   7  -5   40.20    9.90
   1   7   5   49.60   10.50
   3  -7   5   -9.80    7.20
  -3  -7  -5    4.30    6.40
  -3  -7  -5    5.10    8.60
   3  -7   5   11.10    7.90
  -3   7  -5    1.30    8.90
   3   7   5    7.70    8.10
   3   7   5   -9.60    9.40
   5  -7   5  275.77   18.60
   5  -7   5  265.07   18.80
  -5  -7  -5  287.57   16.30
  -5  -7  -5  298.57   20.00
  -5   7  -5  256.27   20.30
   5   7   5  250.17   24.20
  -7  -7  -5  128.99   14.10
   7  -7   5  159.98   14.30
   7  -7   5  122.79   14.40
  -7  -7  -5  124.59   12.50
  -7   7  -5  125.09   15.90
   7   7   5  141.59   20.60
  -9  -7  -5   78.69   11.80
  -9  -7  -5   55.69   11.90
   9  -7   5   63.09   12.50
   9   7   5   83.39   19.50
  -9   7  -5   55.19   14.30
 -11  -7  -5  496.35   26.00
  11  -7   5  492.85   27.00
 -11  -7  -5  442.56   24.80
  11   7   5  468.25   36.70
 -11   7  -5  462.55   31.60
 -13  -7  -5    8.60   11.70
  13  -7   5   -7.30   11.70
 -13  -7  -5   -2.70   11.00
 -13   7  -5   17.50   15.10
  13   7   5  -26.10   16.30
  15  -7   5   83.49   16.90
 -15  -7  -5   68.29   14.40
 -15  -7  -5  118.39   17.30
  15   7   5   90.19   25.70
 -15   7  -5  110.19   21.60
  17  -7   5    0.70   14.90
 -17  -7  -5   27.90   16.30
 -17   7  -5   24.20   20.30
  17   7   5   23.10   23.90
 -19  -7  -5  -10.90   16.50
  19  -7   5   21.70   16.50
  19   7   5   30.10   25.50
 -19   7  -5   20.50   21.80
 -24  -8   5   45.30   22.10
  24   8  -5  -12.20   26.20
  22  -8  -5   -0.40   14.40
 -22  -8   5    9.00   18.60
  22   8  -5  -12.60   17.40
  22   8  -5  -19.60   24.50
 -20  -8   5  -13.60   16.60
  20  -8  -5   -9.20   13.10
  20   8  -5   17.30   24.60
  20   8  -5   -5.60   17.60
 -18  -8   5  106.39   18.90
  18  -8  -5  102.99   17.20
  18   8  -5   87.79   25.00
  18   8  -5   88.69   18.10
 -18   8   5   58.39   16.50
  16  -8  -5  320.37   23.50
 -16  -8   5  252.57   22.20
  16   8  -5  229.28   29.70
  16   8  -5  264.37   23.10
 -16   8   5  212.58   19.80
 -14  -8   5  408.96   26.60
  14  -8  -5  343.87   25.90
  14   8  -5  334.97   25.30
  14   8  -5  316.87   30.90
 -14   8   5  335.97   22.80
  12  -8  -5  434.06   27.40
 -12  -8   5  528.15   27.50
  12   8  -5  423.36   33.40
  12   8  -5  453.05   26.10
 -12   8   5  393.26   22.40
  10  -8  -5  126.79   17.10
 -10  -8   5  107.29   14.70
 -10  -8   5  128.69   13.90
  10   8  -5  111.69   14.00
  10   8  -5  123.49   20.60
 -10   8   5  121.59   13.00
 -10   8   5  132.99   12.90
   8  -8  -5  175.78   18.20
  -8  -8   5  141.39   14.80
  -8  -8   5  145.69   14.40
   8  -8  -5  186.98   17.50
   8   8  -5  178.38   21.20
  -8   8   5  138.59   12.10
   8   8  -5  173.98   15.20
  -8   8   5  176.88   15.30
   6  -8  -5   16.00   10.90
   6  -8  -5    7.50    6.20
  -6  -8   5    0.00    8.80
  -6  -8   5    7.40    8.40
   6   8  -5   -2.60   12.30
   6   8  -5    1.50    8.30
  -6   8   5    8.20    9.00
  -6   8   5    9.90    8.40
  -6   8   5    7.10    6.80
  -4  -8   5   26.30    9.40
  -4  -8   5   32.90   10.30
   4  -8  -5   29.00    6.60
   4  -8  -5    5.80   10.20
   4   8  -5   11.40   12.90
   4   8  -5   22.20    9.10
  -4   8   5   28.60   10.00
  -4   8   5   17.90    7.10
  -4   8   5   16.80    9.70
  -2  -8   5    8.10    8.70
   2  -8  -5   31.50    6.90
   2  -8  -5   20.50   10.20
  -2  -8   5   -3.90    8.40
   2   8  -5   14.80    8.30
   2   8  -5   10.10   11.80
  -2   8   5   18.70    7.30
  -2   8   5   13.00    9.80
  -2   8   5    9.60    9.90
   2   8  -5    5.40   10.30
   0  -8  -5  154.18   16.20
   0  -8   5  139.89   13.70
   0  -8  -5  188.98   13.40
   0  -8   5  183.18   16.10
   0   8  -5  146.89   16.60
   0   8   5  182.98   16.30
   0   8  -5  158.88   15.80
   0   8   5  144.09   17.30
   0   8  -5  183.18   14.20
  -2  -8  -5    4.30    9.30
  -2  -8  -5    9.80    7.30
   2  -8   5  -14.10    8.30
   2  -8   5    7.60    8.80
  -2   8  -5   13.50   10.70
  -2   8  -5    3.70    7.60
   2   8   5   -2.50   10.30
   4  -8   5   -6.70    9.10
  -4  -8  -5    1.70    9.40
   4  -8   5   -8.50    8.40
  -4  -8  -5    3.30    7.80
   4   8   5   19.90   13.00
  -4   8  -5    6.20   11.10
   6  -8   5  151.78   14.80
  -6  -8  -5  136.29   16.10
  -6  -8  -5  131.99   12.80
   6  -8   5  143.59   16.70
  -6   8  -5  140.09   17.80
   6   8   5  152.08   21.50
   8  -8   5  152.58   15.30
   8  -8   5  155.58   17.80
  -8  -8  -5  146.69   15.00
  -8  -8  -5  141.09   16.80
   8   8   5  170.48   23.80
  -8   8  -5  153.08   19.30
 -10  -8  -5  598.44   29.90
 -10  -8  -5  569.14   27.60
  10  -8   5  573.14   31.20
 -10   8  -5  586.24   34.20
  10   8   5  605.84   40.00
  12  -8   5  306.67   24.60
 -12  -8  -5  389.06   26.40
 -12  -8  -5  338.57   26.10
  12   8   5  388.36   36.80
 -12   8  -5  398.36   29.40
 -14  -8  -5  225.28   21.20
 -14  -8  -5  254.97   21.80
  14  -8   5  238.28   23.40
 -14   8  -5  246.98   26.70
  14   8   5  325.97   35.70
  16  -8   5   11.30   15.70
 -16  -8  -5   32.30   16.20
 -16   8  -5   21.70   19.90
  16   8   5   10.40   22.20
  18  -8   5  -22.60   16.00
 -18  -8  -5  -37.40   16.40
 -18   8  -5  -23.70   20.30
  18   8   5   11.10   24.60
 -23  -9   5   18.90   21.90
  23   9  -5  -28.40   24.10
  21  -9  -5   38.40   16.40
 -21  -9   5    7.50   19.00
  21   9  -5   22.90   19.10
  21   9  -5  -45.70   21.60
 -19  -9   5   -3.40   16.70
  19  -9  -5    2.00   14.70
  19   9  -5   -5.90   16.90
  19   9  -5   -8.50   22.00
 -17  -9   5   55.99   17.60
  17  -9  -5   63.29   17.10
  17   9  -5   27.70   23.00
  17   9  -5   74.59   18.50
  15  -9  -5  190.38   21.20
 -15  -9   5  186.38   20.70
  15   9  -5  150.28   19.90
  15   9  -5  141.79   26.30
 -13  -9   5  198.08   20.20
  13  -9  -5  176.98   19.90
  13   9  -5  160.88   19.70
  13   9  -5  124.69   24.90
  11  -9  -5   73.69   15.80
 -11  -9   5   87.19   15.80
  11   9  -5   72.39   15.00
  11   9  -5   74.79   21.30
  -9  -9   5  215.08   18.30
  -9  -9   5  193.18   18.70
   9  -9  -5  234.68   21.60
   9   9  -5  238.78   20.60
  -9   9   5  213.48   17.10
   9   9  -5  259.47   27.10
  -7  -9   5   52.69   11.90
   7  -9  -5   43.30   13.60
  -7  -9   5   45.80   12.70
   7   9  -5   76.89   19.60
  -7   9   5   31.60   10.80
   7   9  -5   28.00   11.50
   5  -9  -5   18.70   12.00
  -5  -9   5    1.40   10.60
  -5  -9   5    7.90    9.70
   5   9  -5    3.20   14.20
   5   9  -5    0.40   10.10
  -5   9   5   -7.00    9.30
  -3  -9   5   93.79   13.90
  -3  -9   5   79.29   13.60
   3  -9  -5   93.79   15.30
   3   9  -5   95.19   13.30
   3   9  -5   84.89   15.70
   3   9  -5  109.89   17.60
  -3   9   5   84.79   14.10
  -1  -9   5  165.58   17.00
  -1  -9   5  124.19   14.50
   1  -9  -5  131.99   17.20
  -1   9   5  136.89   17.90
   1   9  -5  142.49   17.10
   1   9  -5  157.08   15.00
   1   9  -5  147.89   18.40
   1  -9   5   56.09   11.90
  -1  -9  -5   40.80   12.70
   1  -9   5   42.50   11.90
  -1   9  -5   35.80   10.70
  -1   9  -5   79.09   15.70
   1   9   5   60.99   15.30
  -3  -9  -5    3.60   11.30
   3  -9   5  -17.70    9.60
   3  -9   5  -19.60    8.50
  -3   9  -5   -1.10    9.20
   3   9   5  -17.20   11.20
  -3   9  -5   -3.10   12.10
  -5  -9  -5   28.60   12.90
   5  -9   5   41.80   11.60
  -5  -9  -5   59.69   17.20
   5  -9   5   28.60   12.50
   5   9   5   30.20   16.50
  -5   9  -5   46.30   16.00
  -7  -9  -5  127.29   20.80
  -7  -9  -5  103.79   16.30
   7  -9   5   84.39   14.30
   7  -9   5  116.99   17.10
   7   9   5  137.69   22.30
  -7   9  -5  109.69   19.50
   9  -9   5  224.88   21.80
  -9  -9  -5  224.78   24.10
  -9  -9  -5  204.98   20.40
   9   9   5  225.18   28.60
  -9   9  -5  210.98   23.20
 -11  -9  -5  160.08   23.80
  11  -9   5  115.69   19.10
 -11  -9  -5  129.19   18.20
  11   9   5  175.38   26.80
 -11   9  -5  172.68   24.30
  13  -9   5   62.19   17.90
 -13  -9  -5   62.89   26.50
 -13  -9  -5   73.89   17.20
 -13   9  -5   67.19   20.50
  13   9   5   55.79   23.30
  15  -9   5  -23.70   14.70
  15   9   5   31.70   23.60
 -15   9  -5  -15.70   18.70
  17  -9   5   15.90   17.60
  17   9   5   45.60   26.20
 -17   9  -5   -4.60   21.80
  20 -10  -5   -8.30   16.00
 -20 -10   5   12.30   20.00
  20  10  -5  -14.00   23.60
  20  10  -5   -0.20   19.60
 -18 -10   5    6.10   17.70
  18 -10  -5    3.20   16.40
  18  10  -5   16.70   18.40
  18  10  -5  -18.70   22.00
  16 -10  -5   16.10   14.90
 -16 -10   5   -0.10   15.80
  16  10  -5   29.30   22.50
  16  10  -5   -7.40   16.20
  14 -10  -5  -10.30   14.10
 -14 -10   5   -1.20   15.60
  14  10  -5    3.40   15.20
  14  10  -5    3.80   20.20
  12 -10  -5    8.50   13.90
 -12 -10   5   37.60   15.50
  12  10  -5    5.80   14.60
  12  10  -5    2.40   18.80
  10 -10  -5   -0.70   13.60
 -10 -10   5   -8.20   12.60
  10  10  -5    2.20   18.50
  10  10  -5   31.50   14.70
  -8 -10   5   -7.80   13.00
  -8 -10   5   15.60   10.60
   8 -10  -5   26.70   14.10
   8  10  -5    7.60   12.50
   8  10  -5    3.90   17.10
  -8  10   5   21.60   11.00
  -6 -10   5   13.40   13.00
   6 -10  -5   16.00   13.10
  -6 -10   5   10.90   11.20
  -6  10   5   27.50   11.80
   6  10  -5   -6.00   11.60
   6  10  -5   -4.70   15.40
  -4 -10   5   24.90   13.00
  -4 -10   5   20.00   11.90
   4 -10  -5   -4.40   12.30
  -4  10   5    6.60   11.20
   4  10  -5   20.40   15.60
   4  10  -5   18.60   12.50
  -2 -10   5  -11.40   10.40
   2 -10  -5   29.00   13.60
  -2 -10   5   -2.90   11.20
  -2  10   5   12.60   12.70
   2  10  -5   -5.60   11.10
   2  10  -5    2.70   14.50
   0 -10   5  -10.40   10.20
   0 -10   5   21.70   12.20
   0 -10  -5    7.20   12.50
   0  10   5    3.40   13.10
   0  10  -5    7.10   14.70
   0  10  -5  -14.00   10.60
  -2 -10  -5    3.80   12.30
   2 -10   5   -1.30   11.10
   2 -10   5  -10.90   10.40
  -2  10  -5   -6.20   10.90
   2  10   5  -10.40   13.00
  -2  10  -5   11.40   14.60
  -4 -10  -5   -7.70   12.60
   4 -10   5   -0.70   11.00
   4 -10   5  -16.30   11.40
  -4  10  -5   -7.50   14.30
   4  10   5    7.60   15.30
  -4  10  -5   14.00   11.80
   6 -10   5    5.40   13.40
  -6 -10  -5   19.60   14.00
   6 -10   5  -12.10   10.80
   6  10   5    6.10   15.80
  -6  10  -5  -14.50   14.70
   8 -10   5    5.50   13.90
  -8 -10  -5   20.10   14.20
   8 -10   5    3.70   12.00
  -8  10  -5   -7.60   16.30
   8  10   5    3.30   16.30
 -10 -10  -5   -1.70   13.80
  10 -10   5   -1.90   14.50
  10  10   5   -1.90   18.70
 -10  10  -5    9.70   17.10
  12 -10   5    3.50   15.90
 -12 -10  -5   35.50   16.60
 -12  10  -5   21.10   20.10
  12  10   5   10.90   20.90
  14 -10   5  -11.50   17.20
  14  10   5   48.50   24.90
 -14  10  -5   20.20   20.40
  16 -10   5   23.50   18.90
  16  10   5   29.70   25.70
 -16  10  -5  -18.90   21.40
  19 -11  -5   36.20   18.40
 -19 -11   5   -3.10   19.40
  19  11  -5   17.20   20.60
  19  11  -5   12.20   24.70
  17 -11  -5   68.09   19.40
 -17 -11   5   92.39   22.50
  17  11  -5   64.99   21.40
  17  11  -5   38.40   25.20
  15 -11  -5   67.99   18.40
 -15 -11   5   55.79   20.20
  15  11  -5   44.60   24.30
  15  11  -5   72.19   20.00
 -13 -11   5  196.78   22.70
  13 -11  -5  165.98   22.30
  13  11  -5  239.98   24.40
  13  11  -5  185.88   29.00
  11 -11  -5  155.68   21.00
 -11 -11   5  113.69   19.50
  11  11  -5  170.38   21.60
  11  11  -5  167.18   27.00
  -9 -11   5   54.79   17.10
   9 -11  -5   59.19   17.20
   9  11  -5   87.19   17.50
   9  11  -5   30.40   19.60
  -7 -11   5   75.79   17.20
   7 -11  -5   95.29   18.00
  -7 -11   5   78.99   15.40
   7  11  -5   57.89   20.20
   7  11  -5   85.39   16.70
   5 -11  -5   47.70   16.00
  -5 -11   5    9.40   12.50
  -5 -11   5    4.60   13.60
   5  11  -5   -2.10   12.90
   5  11  -5   -0.90   16.60
  -5  11   5   13.50   13.30
   3 -11  -5    2.50   13.70
  -3 -11   5    6.70   12.40
  -3 -11   5  -16.10   12.00
   3  11  -5   -3.20   13.00
   3  11  -5  -21.70   15.10
  -3  11   5    9.60   13.90
   1 -11  -5   62.39   17.00
  -1 -11   5   56.39   14.20
  -1 -11   5   55.29   15.10
   1  11  -5   64.59   15.10
   1  11  -5   20.60   17.00
  -1  11   5   40.20   16.60
   1 -11   5   44.30   15.20
  -1 -11  -5   19.60   14.90
   1 -11   5   30.70   13.30
  -1  11  -5   47.60   14.40
   1  11   5   36.80   16.40
  -1  11  -5   -0.80   16.00
   3 -11   5   24.50   14.30
  -3 -11  -5    0.20   14.40
   3 -11   5   -0.50   12.00
  -3  11  -5    7.00   12.80
   3  11   5   15.90   16.40
  -3  11  -5    6.40   16.70
   5 -11   5   18.60   13.60
   5 -11   5   13.00   15.20
  -5 -11  -5    3.40   14.80
  -5  11  -5   -7.10   17.50
   5  11   5   20.70   16.90
  -5  11  -5   10.20   13.90
   7 -11   5  111.39   17.80
  -7 -11  -5   96.29   19.60
   7 -11   5  113.19   19.80
  -7  11  -5  131.89   18.60
  -7  11  -5  185.68   25.30
   7  11   5  183.38   27.40
   9 -11   5   87.69   19.90
   9 -11   5   30.70   15.20
  -9 -11  -5   29.60   16.70
  -9  11  -5   50.79   20.20
   9  11   5   48.10   21.50
  11 -11   5   38.80   18.80
 -11 -11  -5   32.00   17.90
 -11  11  -5   80.09   22.90
  11  11   5   37.20   21.40
  13 -11   5   50.19   20.10
  13  11   5   67.79   26.00
 -13  11  -5   33.40   22.30
  16 -12  -5   50.49   20.50
 -16 -12   5   41.90   21.70
  16  12  -5   55.99   26.00
  16  12  -5   83.69   23.20
  14 -12  -5  134.79   22.80
 -14 -12   5   96.19   21.60
  14  12  -5   48.00   24.70
  14  12  -5   99.39   22.20
  12 -12  -5   75.89   20.60
 -12 -12   5  121.69   22.00
  12  12  -5   81.19   20.20
  12  12  -5  105.29   25.20
 -10 -12   5   49.40   18.80
  10 -12  -5   81.19   19.50
  10  12  -5   80.99   20.10
  10  12  -5   71.79   22.10
  -8 -12   5    8.30   16.90
   8 -12  -5   -3.70   15.30
   8  12  -5   10.50   17.20
   8  12  -5   31.90   20.70
  -6 -12   5   28.70   13.90
  -6 -12   5   12.40   16.30
   6 -12  -5   32.20   16.50
   6  12  -5   -3.10   20.50
   6  12  -5    8.20   15.10
   4 -12  -5   21.20   15.30
  -4 -12   5   30.00   14.70
  -4 -12   5   12.30   15.20
  -4  12   5   30.90   15.10
   4  12  -5    0.70   17.40
   4  12  -5   23.30   15.80
   2 -12  -5   37.90   16.90
  -2 -12   5   31.80   14.80
   2  12  -5   25.00   15.80
  -2  12   5    7.60   15.10
   2  12  -5   21.40   19.50
   0 -12   5    5.30   13.00
   0 -12  -5    2.10   15.80
   0 -12   5   16.40   14.60
   0  12   5   -2.60   15.50
   0  12  -5   14.30   18.50
   0  12  -5   16.40   14.80
   2 -12   5   47.90   14.80
   2 -12   5   17.50   15.00
  -2 -12  -5   30.60   16.20
  -2  12  -5   47.60   16.90
  -2  12  -5   70.09   20.00
   2  12   5   27.80   17.60
   4 -12   5   17.30   13.80
  -4 -12  -5   16.30   16.60
   4 -12   5   17.80   15.50
  -4  12  -5    6.20   19.40
   4  12   5   17.50   18.20
  -4  12  -5   15.30   15.90
  -6 -12  -5    1.60   16.80
   6 -12   5   31.50   16.40
   6 -12   5    8.70   14.40
  -6  12  -5   26.20   20.40
   6  12   5  -11.20   18.90
  -6  12  -5   -2.30   15.70
  -8 -12  -5   20.30   18.00
   8 -12   5   29.50   16.00
   8 -12   5   21.50   17.70
  -8  12  -5   10.80   20.90
   8  12   5   56.69   22.10
  -8  12  -5   63.29   18.80
 -10 -12  -5   19.50   18.90
  10 -12   5   51.99   19.80
  10  12   5   50.49   22.70
 -10  12  -5   86.99   24.50
 -12  12  -5   64.49   25.30
  13 -13  -5   70.19   21.10
 -13 -13   5   78.29   22.40
  13  13  -5    5.50   23.80
  13  13  -5   63.39   23.00
  11 -13  -5   37.90   18.80
 -11 -13   5   41.50   19.50
  11  13  -5    7.60   22.00
  11  13  -5   41.20   20.50
  -9 -13   5   64.69   20.60
   9 -13  -5   21.70   18.40
   9  13  -5   15.10   21.90
   9  13  -5   54.89   20.50
  -7 -13   5   53.59   19.60
   7 -13  -5   85.59   20.40
   7  13  -5   68.49   19.20
  -5 -13   5   12.50   17.00
   5 -13  -5   19.70   17.60
  -5 -13   5   27.40   14.60
   5  13  -5   -5.00   16.90
   5  13  -5   -4.60   19.70
  -3 -13   5   22.20   14.90
  -3 -13   5   10.50   15.20
   3 -13  -5   44.10   18.50
   3  13  -5    5.00   19.90
   3  13  -5  -13.90   16.90
   1 -13  -5   22.90   17.40
  -1 -13   5   14.70   15.10
  -1 -13   5   11.20   15.60
   1  13  -5   45.50   21.20
   1  13  -5   26.40   17.70
  -1  13   5   14.90   16.40
   1 -13   5   17.30   15.60
  -1 -13  -5   14.20   17.10
   1 -13   5   29.40   16.70
  -1  13  -5  -21.40   16.20
  -1  13  -5    2.90   20.10
   1  13   5   24.80   17.90
   3 -13   5   86.89   18.90
  -3 -13  -5   91.29   21.20
   3 -13   5  139.19   22.10
  -3  13  -5  130.39   21.90
  -3  13  -5   95.99   25.00
   3  13   5   76.29   20.60
  -5 -13  -5  -23.30   16.30
   5 -13   5   -8.40   15.60
   5 -13   5   24.90   18.60
  -5  13  -5   34.40   18.80
   5  13   5   21.50   19.70
  -5  13  -5   39.20   22.60
   7 -13   5   89.49   21.90
   7 -13   5   25.20   16.90
  -7 -13  -5  -10.90   17.80
  -7  13  -5   22.00   19.10
   7  13   5   46.60   22.60
  -7  13  -5   47.40   23.20
  -8 -14   5  -12.60   19.00
   8 -14  -5   10.50   18.90
   8  14  -5   46.90   20.40
  -6 -14   5   77.69   21.10
   6 -14  -5   62.79   20.80
   6  14  -5   56.29   24.20
   6  14  -5   61.79   20.60
   4 -14  -5   82.79   21.20
  -4 -14   5  137.49   20.90
  -4 -14   5  102.39   20.30
   4  14  -5  102.59   22.90
   4  14  -5  117.59   26.60
  -2 -14   5  110.09   20.20
  -2 -14   5   67.09   17.90
   2 -14  -5   27.10   18.60
   2  14  -5   40.90   22.80
   2  14  -5   42.70   21.40
   0 -14  -5   89.19   22.00
   0 -14   5   73.99   19.90
   0 -14   5   74.39   19.00
   0  14   5   85.09   22.20
   0  14  -5  114.69   26.50
   0  14  -5  127.89   23.80
   2 -14   5   32.90   16.80
  -2 -14  -5   43.80   20.40
   2 -14   5   47.60   18.40
   2  14   5   47.90   21.60
  -2  14  -5   50.69   20.50
  -2  14  -5   23.00   22.00
 -28   0   6  214.88   25.60
 -26   0   6   97.99   19.40
  26   0  -6   80.59   24.40
 -24   0   6   64.39   15.80
  24   0  -6   31.50   17.60
 -22   0   6   -2.20   11.10
  22   0  -6    3.60   12.10
  22   0  -6    9.30   13.90
  20   0  -6   91.39   13.80
  20   0  -6   98.19   15.80
 -20   0   6   90.69   13.10
  18   0  -6  311.67   21.70
 -18   0   6  299.17   19.20
  18   0  -6  281.97   19.70
 -16   0   6   -0.20    6.60
  16   0  -6  -13.30    7.40
  16   0  -6   -0.80    8.10
 -16   0   6   -5.70    6.90
 -14   0   6  297.87   15.30
  14   0  -6  293.17   15.90
 -14   0   6  279.07   16.10
  14   0  -6  277.27   16.20
 -12   0   6  231.68   12.50
 -12   0   6  230.68   13.60
  12   0  -6  249.88   13.10
  12   0  -6  249.97   14.00
  10   0  -6 1532.85   39.50
  10   0  -6 1469.25   40.70
 -10   0   6 1527.55   41.50
 -10   0   6 1488.75   39.70
  10   0  -6 1499.65   37.30
   8   0  -6 2916.91   70.49
  -8   0   6 2849.01   70.79
   8   0  -6 2843.02   67.19
   8   0  -6 2879.71   68.39
  -8   0   6 2792.22   69.19
   6   0  -6 4253.57   98.99
   6   0  -6 4291.57  101.19
   6   0  -6 4308.57   98.89
  -6   0   6 4326.07  101.99
  -6   0   6 4164.98  100.09
  -4   0   6 5250.47  123.49
  -4   0   6 5382.86  123.89
  -4   0   6 5375.76  125.79
   4   0  -6 5402.06  123.59
  -2   0   6 1673.93   41.10
   2   0  -6 1647.04   40.70
  -2   0   6 1622.64   42.10
  -2   0   6 1613.24   39.70
   2   0  -6 1607.44   40.80
   0   0  -6 1633.94   40.60
   0   0  -6 1573.64   41.00
   0   0   6 1666.43   42.00
   0   0  -6 1626.34   39.50
   0   0   6 1595.94   41.20
   0   0   6 1605.84   39.60
   2   0   6  140.09    9.00
  -2   0  -6  146.19    9.10
  -2   0  -6  149.99    8.70
  -2   0  -6  145.69    7.50
   2   0   6  151.78    9.00
  -4   0  -6  415.66   15.80
   4   0   6  418.36   16.10
  -4   0  -6  420.26   14.30
   4   0   6  443.16   16.10
  -4   0  -6  410.76   16.00
  -6   0  -6 1415.66   39.20
   6   0   6 1392.56   39.50
  -6   0  -6 1360.56   38.90
  -6   0  -6 1468.25   37.90
   6   0   6 1390.76   39.00
  -8   0  -6   15.50    6.90
   8   0   6   12.40    6.30
  -8   0  -6   12.80    5.40
   8   0   6   10.10    6.20
  -8   0  -6   15.20    6.40
 -10   0  -6   62.69    9.60
 -10   0  -6   66.79   10.20
  10   0   6   70.29   10.70
  10   0   6   83.19   10.00
  12   0   6  533.85   23.30
 -12   0  -6  535.65   25.20
 -12   0  -6  557.64   23.60
  12   0   6  543.95   25.20
  14   0   6  655.93   27.30
 -14   0  -6  630.54   26.70
 -14   0  -6  643.34   29.30
 -16   0  -6  844.92   32.50
  16   0   6  827.02   32.90
 -16   0  -6  875.41   36.10
 -18   0  -6  561.94   27.60
 -18   0  -6  609.24   33.00
  18   0   6  500.95   27.40
 -20   0  -6  326.27   24.40
 -20   0  -6  365.36   28.40
  20   0   6  265.57   22.00
 -22   0  -6   27.40   18.70
 -29  -1   6  123.79   23.20
 -29   1   6  126.89   22.80
 -27  -1   6   49.60   19.20
 -27   1   6   10.80   17.40
  27   1  -6   79.49   25.10
 -25  -1   6   57.19   17.40
  25   1  -6   77.49   21.20
 -25   1   6   63.99   16.90
  23  -1  -6   86.79   17.90
  23  -1  -6   48.50   16.30
 -23  -1   6   76.79   16.10
 -23   1   6   55.59   14.40
  23   1  -6   74.19   20.00
  23   1  -6   64.39   16.80
  21  -1  -6   20.00   12.70
  21  -1  -6   17.80   12.10
 -21  -1   6   20.70   11.70
  21   1  -6    3.80   13.90
  21   1  -6    3.50   12.40
 -21   1   6   19.90   11.80
  19  -1  -6    6.80    9.90
  19  -1  -6   13.90   10.80
 -19  -1   6    3.20    9.40
  19   1  -6   16.60   12.30
 -19   1   6   10.50    9.30
  19   1  -6   22.60   10.60
  17  -1  -6  245.68   18.20
 -17  -1   6  280.27   18.40
  17  -1  -6  248.48   17.80
 -17   1   6  252.97   17.30
  17   1  -6  268.07   20.10
  17   1  -6  255.47   18.20
 -17   1   6  260.77   17.20
  15  -1  -6   93.39   11.30
  15  -1  -6   71.89   10.10
  15  -1  -6   73.59    5.90
 -15  -1   6   69.49    9.50
 -15   1   6   67.69    9.20
 -15   1   6   66.29    9.70
  15   1  -6   61.89   10.80
  15   1  -6   65.39    9.50
 -13  -1   6  136.79   12.30
  13  -1  -6  133.99    8.10
  13  -1  -6  129.89   10.60
  13  -1  -6  156.78   11.90
 -13  -1   6  128.59   10.70
  13   1  -6  133.99   12.10
 -13   1   6  134.69   11.30
  13   1  -6  123.69   10.20
 -13   1   6  122.19    9.80
  11  -1  -6  563.84   20.10
 -11  -1   6  577.14   20.40
  11  -1  -6  543.35   18.00
 -11  -1   6  572.24   21.60
  11  -1  -6  605.74   20.70
  11   1  -6  598.04   21.70
  11   1  -6  604.84   19.60
 -11   1   6  595.34   19.10
 -11   1   6  576.34   20.60
  -9  -1   6 1417.56   39.10
   9  -1  -6 1405.46   37.10
   9  -1  -6 1428.66   38.10
  -9  -1   6 1385.76   38.20
   9  -1  -6 1410.96   36.90
  -9   1   6 1384.96   38.40
   9   1  -6 1377.46   36.20
  -9   1   6 1393.46   36.20
   9   1  -6 1445.26   38.70
   7  -1  -6 1276.57   33.40
  -7  -1   6 1255.07   31.00
  -7  -1   6 1230.18   34.20
  -7  -1   6 1273.27   34.90
   7  -1  -6 1220.78   32.70
  -7   1   6 1309.87   35.10
   7   1  -6 1283.07   34.40
   7   1  -6 1301.17   31.90
   7   1  -6 1301.37   30.80
  -7   1   6 1238.78   32.20
  -5  -1   6 2049.79   52.39
  -5  -1   6 2101.39   49.99
   5  -1  -6 2080.39   50.99
  -5  -1   6 2156.68   52.29
   5  -1  -6 2153.08   51.49
  -5   1   6 2144.49   53.29
   5   1  -6 2074.29   52.09
   5   1  -6 2076.39   49.90
  -5   1   6 2001.40   49.60
   3  -1  -6  288.67   11.20
  -3  -1   6  300.77   11.70
   3  -1  -6  302.97    9.40
  -3  -1   6  269.47   11.00
  -3  -1   6  310.97   10.60
  -3   1   6  304.27    8.70
   3   1  -6  292.57   10.60
  -3   1   6  297.47   12.60
   1  -1  -6   41.70    3.70
  -1  -1   6   38.30    4.80
   1  -1  -6   46.80    4.80
  -1  -1   6   41.40    5.10
   1  -1  -6   30.60    4.70
  -1  -1   6   49.90    5.00
   1   1  -6   40.00    5.30
   1   1  -6   40.10    4.90
  -1   1   6   43.10    5.30
  -1   1   6   39.80    5.80
   1  -1   6   30.80    4.50
  -1  -1  -6   44.40    5.60
   1  -1   6   46.50    5.00
  -1  -1  -6   34.90    4.90
  -1  -1  -6   34.60    4.20
   1  -1   6   26.80    4.80
   1   1   6   33.50    5.20
  -1   1  -6   37.00    5.70
   1   1   6   45.40    6.30
  -1   1  -6   29.80    5.20
  -3  -1  -6  216.18   11.00
  -3  -1  -6  242.18   10.40
   3  -1   6  206.88   10.00
  -3  -1  -6  214.58   10.20
   3  -1   6  209.38   10.80
   3   1   6  217.08   11.20
   3   1   6  203.88   12.00
  -3   1  -6  233.88   11.50
  -3   1  -6  208.68   11.60
  -3   1  -6  214.08    8.70
  -5  -1  -6   90.39    8.70
  -5  -1  -6  110.09    8.30
   5  -1   6  107.09    9.00
  -5  -1  -6  108.39    8.60
   5  -1   6  107.19    8.30
   5   1   6  106.79    9.20
  -5   1  -6  105.99    9.30
  -5   1  -6  104.89    7.50
  -5   1  -6  103.89    9.20
   5   1   6  101.09   10.30
  -7  -1  -6   68.59    8.20
  -7  -1  -6   91.69    8.90
   7  -1   6   77.19    7.40
  -7   1  -6   81.99    9.00
   7   1   6   66.39    8.20
   7   1   6   61.59    9.70
   7   1   6   54.79    7.50
  -7   1  -6   86.29    7.50
  -7   1  -6  102.59   10.00
  -9  -1  -6   17.10    6.90
  -9  -1  -6   14.10    7.00
   9  -1   6   12.60    6.00
   9  -1   6   12.70    7.10
  -9   1  -6   26.80    8.60
   9   1   6    8.60    8.30
   9   1   6   20.60    7.10
  -9   1  -6   18.80    7.20
  11  -1   6  130.59   12.60
  11  -1   6  152.58   12.60
 -11  -1  -6  161.98   13.50
 -11  -1  -6  163.08   14.10
 -11   1  -6  158.78   13.50
 -11   1  -6  187.48   15.90
  11   1   6  172.28   17.40
  11   1   6  150.28   12.90
 -13  -1  -6  230.48   17.40
  13  -1   6  228.38   16.40
 -13  -1  -6  178.88   14.90
  13   1   6  214.68   15.90
  13   1   6  265.57   22.30
 -13   1  -6  204.78   16.40
 -13   1  -6  246.68   19.20
 -15  -1  -6  297.77   22.40
  15  -1   6  275.27   19.80
 -15  -1  -6  332.67   20.70
 -15   1  -6  309.37   22.50
 -15   1  -6  311.37   20.20
  15   1   6  286.37   20.10
  15   1   6  316.97   25.80
  17  -1   6  187.28   17.20
 -17  -1  -6  221.88   21.00
 -17  -1  -6  230.68   18.60
 -17   1  -6  213.18   17.90
  17   1   6  198.78   17.80
 -17   1  -6  232.98   22.20
 -19  -1  -6  150.68   20.00
 -19  -1  -6  182.88   17.80
  19  -1   6  126.69   16.50
  19   1   6  129.59   16.70
 -19   1  -6  163.38   21.70
 -19   1  -6  143.99   17.10
  21  -1   6   82.69   16.20
 -21  -1  -6   78.29   20.10
 -21   1  -6   81.69   20.90
 -21   1  -6   67.49   15.00
 -28  -2   6   13.80   18.70
  28   2  -6    0.40   23.40
 -28   2   6  -21.40   17.40
 -26  -2   6    5.90   15.90
 -26   2   6   21.50   16.50
  26   2  -6   29.80   22.10
 -24  -2   6   39.50   14.90
 -24   2   6    0.30   13.40
  24   2  -6    9.30   15.70
  24   2  -6   12.90   18.60
  22  -2  -6  146.09   20.00
  22  -2  -6  147.99   18.90
 -22  -2   6  176.78   18.70
  22   2  -6  158.68   21.70
 -22   2   6  142.09   17.10
  22   2  -6  137.89   17.70
  20  -2  -6  128.59   16.00
 -20  -2   6  144.99   16.00
  20  -2  -6  114.59   15.70
  20   2  -6  140.39   15.90
  20   2  -6  130.09   20.00
 -20   2   6  135.49   15.10
 -18  -2   6   96.89   12.60
  18  -2  -6   99.69   13.00
  18  -2  -6   92.39   12.80
  18   2  -6   90.09   12.90
  18   2  -6   75.29   15.00
 -18   2   6   81.49   11.80
 -18   2   6   87.09   11.80
 -16  -2   6  204.98   15.40
  16  -2  -6  185.78   15.00
  16  -2  -6  247.08   18.10
  16  -2  -6  225.78   11.80
 -16   2   6  197.18   15.30
  16   2  -6  207.98   18.00
 -16   2   6  224.68   15.50
  16   2  -6  244.38   17.00
  14  -2  -6  104.69   10.60
  14  -2  -6  102.29   10.90
  14  -2  -6  108.99    8.80
 -14  -2   6   98.69   10.70
 -14   2   6   90.19    9.30
 -14   2   6  114.09   10.70
  14   2  -6  110.19   12.50
  14   2  -6  107.29   10.90
 -12  -2   6  159.98   11.90
 -12  -2   6  158.98   12.80
  12  -2  -6  145.09   11.60
  12  -2  -6  139.89   10.70
  12  -2  -6  182.78   12.00
  12   2  -6  176.28   11.90
 -12   2   6  153.38   10.40
 -12   2   6  177.08   11.50
  12   2  -6  169.68   13.50
  10  -2  -6   28.10    6.00
 -10  -2   6   18.50    5.90
  10  -2  -6   26.00    6.10
  10  -2  -6   25.30    5.90
 -10  -2   6   25.60    6.40
  10   2  -6   19.80    6.50
 -10   2   6   18.10    5.50
  10   2  -6   15.10    5.20
 -10   2   6   19.80    4.50
   8  -2  -6   34.80    6.00
   8  -2  -6   28.80    5.40
  -8  -2   6   32.40    6.00
  -8  -2   6   33.40    6.00
  -8   2   6   33.30    5.60
   8   2  -6   22.60    5.80
  -8   2   6   33.50    3.90
   8   2  -6   31.60    4.60
   6  -2  -6    2.30    4.00
  -6  -2   6    1.60    3.80
   6  -2  -6    4.40    4.60
  -6  -2   6    2.30    4.10
  -6  -2   6    2.30    2.50
   6   2  -6   -1.40    3.80
   6   2  -6    1.90    2.70
   6   2  -6    0.90    2.70
  -6   2   6    6.10    4.20
  -6   2   6    1.60    2.20
  -4  -2   6  389.06   14.00
   4  -2  -6  381.46   14.50
  -4  -2   6  393.56   12.30
  -4  -2   6  396.86   14.70
   4  -2  -6  354.46   13.70
  -4   2   6  381.96   15.20
   4   2  -6  379.16   13.60
  -2  -2   6  297.97   11.90
  -2  -2   6  286.47   10.70
   2  -2  -6  262.47   11.60
  -2  -2   6  273.77   11.00
   2   2  -6  277.97   10.70
   2   2  -6  282.47   13.30
  -2   2   6  260.37   12.70
   0  -2   6  513.35   16.10
   0  -2  -6  555.04   17.60
   0  -2   6  541.65   17.10
   0  -2  -6  512.35   14.30
   0  -2  -6  491.85   17.20
   0  -2   6  529.75   17.30
   0   2  -6  540.15   18.80
   0   2   6  524.75   19.50
   2  -2   6  188.18    8.60
  -2  -2  -6  189.38    8.50
  -2  -2  -6  185.68   10.40
  -2  -2  -6  179.48   10.70
   2  -2   6  197.68   10.20
   2  -2   6  190.68   10.20
  -2   2  -6  164.08   11.20
  -2   2  -6  185.38    7.40
   2   2   6  182.18   10.80
   2   2   6  188.78   12.30
  -4  -2  -6  978.30   28.80
   4  -2   6  997.00   28.70
   4  -2   6 1002.80   26.10
  -4  -2  -6  974.00   27.10
  -4  -2  -6  959.80   28.50
  -4   2  -6  952.20   26.00
   4   2   6  925.61   28.90
   4   2   6  954.00   32.00
  -4   2  -6  962.20   29.80
  -6  -2  -6  847.32   26.80
  -6  -2  -6  850.31   29.10
  -6  -2  -6  838.52   25.60
   6  -2   6  889.01   27.10
   6  -2   6  841.52   23.60
   6   2   6  830.12   27.00
   6   2   6  822.32   30.80
  -6   2  -6  824.02   28.00
  -6   2  -6  845.22   24.60
  -8  -2  -6  325.17   16.00
   8  -2   6  300.67   12.80
   8  -2   6  355.76   16.80
  -8  -2  -6  336.67   16.00
   8   2   6  312.47   16.00
  -8   2  -6  310.57   19.50
   8   2   6  319.67   21.10
  -8   2  -6  300.47   17.50
 -10  -2  -6  143.09   12.30
 -10  -2  -6  122.99   11.90
  10  -2   6  166.88   12.80
 -10   2  -6  127.89   13.90
 -10   2  -6  133.69   12.80
  10   2   6  135.09   12.30
  10   2   6  140.49   16.50
 -12  -2  -6   29.60    9.10
 -12  -2  -6   16.20    9.30
  12  -2   6   31.80    9.10
 -12   2  -6   45.00   10.00
  12   2   6   19.60   12.50
  12   2   6   21.00    9.00
 -12   2  -6   33.30   11.10
  14  -2   6   25.90   10.30
 -14  -2  -6   -5.00    8.60
 -14  -2  -6    4.10    9.90
  14   2   6   30.50   10.30
 -14   2  -6   29.40   10.40
  14   2   6   12.30   13.70
 -14   2  -6   26.70   12.20
 -16  -2  -6   19.20   10.50
 -16  -2  -6   -4.30   11.20
  16  -2   6   12.90   11.00
  16   2   6    8.70   10.30
 -16   2  -6    3.80   10.40
 -16   2  -6   14.00   13.60
  16   2   6   -8.30   13.10
 -18  -2  -6    0.10   11.40
  18  -2   6    2.00   11.30
 -18  -2  -6    7.30   13.80
  18   2   6   15.10   12.10
 -18   2  -6   28.50   12.40
 -18   2  -6  -36.90   13.20
 -20  -2  -6    3.40   16.00
  20  -2   6   11.60   13.20
 -20   2  -6    6.80   12.30
 -20   2  -6  -13.50   17.10
  22  -2   6    6.00   14.00
 -22  -2  -6  -10.10   17.00
 -22   2  -6    0.30   17.50
 -22   2  -6  -37.50   18.60
 -27  -3   6    0.10   17.60
  27   3  -6    7.80   24.00
 -27   3   6    1.80   17.40
 -25  -3   6    3.10   16.70
  25   3  -6  -20.60   18.80
 -25   3   6   48.90   17.20
  25   3  -6   12.70   20.40
 -23  -3   6  107.19   17.80
 -23   3   6  104.09   16.90
  23   3  -6   62.09   20.80
  23   3  -6   85.59   18.10
 -21  -3   6  521.95   28.60
  21  -3  -6  486.75   28.00
  21  -3  -6  460.25   29.30
  21   3  -6  418.76   28.20
  21   3  -6  512.15   34.00
 -21   3   6  527.95   28.00
  19  -3  -6  683.83   30.90
 -19  -3   6  706.43   30.70
  19  -3  -6  707.23   29.40
  19   3  -6  676.03   30.30
  19   3  -6  716.33   36.90
 -19   3   6  661.63   29.10
 -19   3   6  668.83   28.70
  17  -3  -6  605.34   21.70
 -17  -3   6  601.84   26.20
  17  -3  -6  591.94   26.50
  17  -3  -6  572.04   24.90
 -17   3   6  532.35   24.00
 -17   3   6  587.34   24.60
  17   3  -6  565.44   29.60
  17   3  -6  580.64   25.50
  15  -3  -6  572.34   23.00
 -15  -3   6  576.64   24.50
  15  -3  -6  562.64   24.50
  15  -3  -6  562.94   21.00
  15   3  -6  602.84   23.70
 -15   3   6  557.14   22.20
  15   3  -6  578.84   27.10
 -15   3   6  558.14   22.70
  13  -3  -6   47.90    8.10
  13  -3  -6   34.80    7.40
  13  -3  -6   40.80    8.50
 -13  -3   6   41.80    8.60
  13   3  -6   29.50    9.30
 -13   3   6   36.90    7.10
 -13   3   6   40.70    7.30
  13   3  -6   72.29    9.10
  11  -3  -6   49.40    8.20
  11  -3  -6   88.09    8.90
 -11  -3   6   78.29    9.20
  11  -3  -6   53.69    8.10
 -11   3   6   77.49    8.70
 -11   3   6   75.09    7.10
  11   3  -6   81.69    8.40
  11   3  -6   81.29   10.50
  -9  -3   6   29.90    6.90
  -9  -3   6   16.30    6.00
   9  -3  -6   22.80    6.50
   9  -3  -6   21.30    6.60
  -9   3   6   15.30    4.00
   9   3  -6   27.80    5.30
   9   3  -6   25.40    6.70
  -9   3   6   19.40    5.70
   7  -3  -6  408.86   16.70
   7  -3  -6  383.26   16.70
  -7  -3   6  401.56   11.90
  -7  -3   6  391.86   16.30
  -7  -3   6  392.86   16.70
  -7   3   6  381.46   16.10
  -7   3   6  379.86   11.60
   7   3  -6  401.76   16.20
   7   3  -6  409.56   13.30
  -5  -3   6 2375.36   62.49
   5  -3  -6 2484.35   62.49
   5  -3  -6 2480.15   62.59
  -5  -3   6 2425.66   58.59
  -5  -3   6 2434.96   61.69
   5   3  -6 2524.55   61.59
  -5   3   6 2482.65   63.09
  -3  -3   6   46.70    5.70
   3  -3  -6   45.20    6.40
  -3  -3   6   41.30    6.20
  -3  -3   6   40.00    4.60
  -3   3   6   45.40    6.90
   3   3  -6   42.40    5.30
   1  -3  -6   69.19    6.90
  -1  -3   6   69.09    6.00
  -1  -3   6   73.09    7.20
  -1  -3   6   75.19    6.40
   1  -3  -6   67.99    7.10
   1   3  -6   74.99    5.90
   1   3  -6   81.69    8.90
  -1   3   6   79.09    8.90
  -1  -3  -6  415.86   12.60
   1  -3   6  425.86   16.20
   1  -3   6  423.16   15.40
  -1  -3  -6  417.06   16.40
   1  -3   6  423.16   13.60
  -1  -3  -6  413.66   16.30
  -1   3  -6  412.56   17.80
   1   3   6  439.96   19.00
  -1   3  -6  423.46   13.30
   3  -3   6 1839.42   48.00
  -3  -3  -6 1856.61   48.40
   3  -3   6 1844.52   44.70
  -3  -3  -6 1851.11   45.60
   3  -3   6 1848.52   48.40
  -3   3  -6 1874.61   50.59
  -3   3  -6 1794.22   45.10
  -3   3  -6 1819.82   44.20
   3   3   6 1763.02   52.69
   5  -3   6 1601.24   39.30
  -5  -3  -6 1601.94   43.90
   5  -3   6 1607.04   43.60
  -5  -3  -6 1606.54   41.90
   5   3   6 1620.64   44.00
   5   3   6 1573.84   49.60
  -5   3  -6 1583.24   41.10
  -5   3  -6 1596.34   45.90
   7  -3   6 1143.29   29.50
  -7  -3  -6 1166.08   34.60
   7  -3   6 1154.58   34.80
  -7  -3  -6 1192.38   33.70
  -7   3  -6 1084.19   32.30
  -7   3  -6 1123.19   36.90
   7   3   6 1231.28   43.00
   7   3   6 1192.38   35.50
  -9  -3  -6  379.96   18.80
  -9  -3  -6  379.66   18.40
   9  -3   6  400.06   19.20
  -9   3  -6  390.26   21.60
   9   3   6  388.46   19.20
   9   3   6  364.36   25.30
  11  -3   6   12.00    8.20
 -11  -3  -6   18.50    8.80
 -11  -3  -6    7.20    8.00
  11   3   6   22.10    8.70
 -11   3  -6   29.10   11.00
  11   3   6    8.40   12.50
  13  -3   6  118.79   13.60
 -13  -3  -6  136.39   14.70
 -13  -3  -6   94.89   12.80
  13   3   6  122.79   20.70
  13   3   6  123.79   13.90
 -13   3  -6  103.99   15.60
 -15  -3  -6   70.99   14.00
  15  -3   6   52.99   12.60
 -15  -3  -6   82.79   13.10
  15   3   6   46.50   19.00
  15   3   6   58.89   12.20
 -15   3  -6   46.80   15.00
 -15   3  -6   89.59   14.60
 -17  -3  -6    3.10   11.10
  17  -3   6    7.10   11.70
 -17  -3  -6   -5.10   12.10
 -17   3  -6    8.20   15.00
  17   3   6   -1.70   11.00
  17   3   6   -6.00   17.70
 -17   3  -6   -4.40   11.70
 -19  -3  -6   54.59   16.90
  19  -3   6   59.29   14.70
 -19   3  -6   36.10   19.00
  19   3   6   77.89   15.70
 -19   3  -6   41.10   14.10
 -21  -3  -6  -10.70   17.30
  21  -3   6    8.20   14.10
 -21   3  -6   -8.90   18.80
 -21   3  -6   -3.70   13.10
 -28  -4   6   16.60   20.30
 -28   4   6    3.80   18.20
  28   4  -6  -18.20   27.20
 -26  -4   6   -6.80   18.10
 -26   4   6   17.80   17.60
  26   4  -6  -15.70   22.70
 -24  -4   6   26.00   16.60
  24   4  -6   27.40   16.30
 -24   4   6   39.30   16.60
  24   4  -6   13.60   21.10
 -22  -4   6   83.39   17.00
  22   4  -6   33.40   18.90
  22   4  -6   68.49   16.60
 -22   4   6   69.19   15.40
  20  -4  -6  168.98   23.40
 -20  -4   6  188.48   18.80
  20   4  -6  156.38   22.10
 -20   4   6  134.09   17.10
 -20   4   6  175.98   17.20
  20   4  -6  135.69   16.80
  18  -4  -6  272.77   20.30
  18  -4  -6  252.67   18.90
 -18  -4   6  266.27   20.00
  18  -4  -6  315.77   17.90
 -18   4   6  280.27   18.60
  18   4  -6  279.77   21.20
 -18   4   6  299.27   20.50
  18   4  -6  272.37   24.40
  16  -4  -6  344.07   17.70
 -16  -4   6  344.87   21.40
  16  -4  -6  330.67   21.30
  16  -4  -6  304.77   17.90
 -16   4   6  280.57   17.30
  16   4  -6  339.37   20.40
  16   4  -6  363.76   24.90
 -16   4   6  297.67   18.40
  14  -4  -6  181.48   13.80
  14  -4  -6  181.38   15.70
  14  -4  -6  162.08   12.80
 -14  -4   6  154.48   14.00
  14   4  -6  175.38   13.80
 -14   4   6  175.68   12.60
  14   4  -6  189.18   17.80
 -14   4   6  156.88   12.50
  12  -4  -6   12.30    6.30
  12  -4  -6   -1.80    6.70
  12  -4  -6    7.90    7.20
 -12  -4   6   17.90    7.50
 -12   4   6   14.30    5.90
  12   4  -6    9.00    6.80
 -12   4   6    5.70    5.80
  12   4  -6    6.60    8.50
  10  -4  -6  157.38   13.20
  10  -4  -6  147.69   12.60
 -10  -4   6  136.09   12.10
  10   4  -6  135.69   10.20
  10   4  -6  142.49   13.10
 -10   4   6  124.19    9.10
 -10   4   6  122.79   10.60
   8  -4  -6 1662.23   45.40
  -8  -4   6 1602.24   45.60
  -8  -4   6 1537.35   39.00
   8  -4  -6 1588.64   46.00
   8   4  -6 1637.44   41.60
  -8   4   6 1584.84   39.60
  -8   4   6 1598.64   44.40
   8   4  -6 1593.74   45.30
   6  -4  -6  322.37   16.20
  -6  -4   6  297.27   11.20
   6  -4  -6  350.46   16.70
  -6  -4   6  328.57   16.00
   6   4  -6  304.27   14.90
  -6   4   6  320.37   15.40
   6   4  -6  315.17   12.20
  -4  -4   6  724.13   22.00
   4  -4  -6  807.02   26.10
  -4  -4   6  793.82   24.30
  -4  -4   6  775.52   25.80
  -4   4   6  770.52   25.20
  -4   4   6  783.82   26.30
   4   4  -6  777.42   24.00
   4   4  -6  781.62   21.60
  -2  -4   6  101.89    7.80
  -2  -4   6  110.79    9.50
   2  -4  -6   92.29    9.00
  -2  -4   6  107.79    7.80
   2   4  -6   87.29    7.40
  -2   4   6   95.89    9.30
  -2   4   6  101.19   10.30
   2   4  -6  101.39   10.80
   0  -4  -6  294.57   14.50
   0  -4   6  276.77   11.40
   0  -4   6  266.67   14.00
   0  -4  -6  295.87    9.90
   0  -4   6  306.27   13.10
   0   4   6  301.57   16.30
   0   4  -6  293.17   11.40
   0   4  -6  301.97   10.60
   0   4  -6  305.27   16.50
   0   4   6  301.97   14.90
   2  -4   6  609.44   20.70
   2  -4   6  585.04   21.50
   2  -4   6  599.94   17.30
  -2  -4  -6  592.14   21.40
  -2  -4  -6  583.74   17.60
  -2   4  -6  557.94   23.30
  -2   4  -6  595.14   17.70
  -2   4  -6  600.84   17.10
   2   4   6  628.24   25.80
   2   4   6  592.24   21.90
   4  -4   6  984.40   25.60
  -4  -4  -6 1014.10   31.20
   4  -4   6 1027.40   31.10
   4  -4   6 1060.39   31.80
  -4  -4  -6  983.00   28.00
  -4   4  -6  998.80   28.00
   4   4   6 1020.30   32.20
  -4   4  -6  989.90   25.30
  -4   4  -6 1011.60   33.70
   4   4   6 1055.39   37.50
  -6  -4  -6  889.81   28.80
  -6  -4  -6  875.21   27.00
   6  -4   6  880.31   28.90
  -6   4  -6  868.81   31.50
   6   4   6  911.41   36.90
  -6   4  -6  885.81   26.30
   8  -4   6  558.24   23.10
  -8  -4  -6  566.24   23.00
  -8  -4  -6  600.64   22.40
   8   4   6  608.34   31.90
  -8   4  -6  588.04   26.30
 -10  -4  -6  118.99   11.90
  10  -4   6  102.59   11.70
 -10  -4  -6  127.49   12.50
  10   4   6  127.79   20.00
 -10   4  -6  122.19   14.70
 -12  -4  -6  203.78   16.60
  12  -4   6  219.88   17.00
 -12  -4  -6  188.78   16.00
 -12   4  -6  213.28   19.60
  12   4   6  193.58   26.10
 -14  -4  -6   24.30   10.80
  14  -4   6    8.10   10.60
 -14   4  -6   46.10   14.40
  14   4   6   -7.80   15.90
 -16  -4  -6   48.80   14.60
 -16  -4  -6   45.70   12.60
  16  -4   6   46.10   12.80
 -16   4  -6   56.29   17.50
  16   4   6   42.10   19.90
 -18  -4  -6   72.69   17.30
  18  -4   6   47.70   14.50
 -18  -4  -6   82.19   17.50
 -18   4  -6   47.70   14.50
 -18   4  -6   70.59   19.80
  18   4   6   71.99   24.30
  20  -4   6    3.70   13.80
 -20  -4  -6   13.40   17.30
 -20   4  -6    4.10   13.30
 -20   4  -6   -1.90   19.40
  20   4   6    3.00   25.50
 -27  -5   6  -41.60   18.70
  27   5  -6    0.00   26.70
 -27   5   6  -14.00   18.50
 -25  -5   6   39.50   19.60
  25   5  -6   45.10   18.70
 -25   5   6   23.90   17.90
  25   5  -6   -7.60   23.20
 -23  -5   6  -10.20   15.20
  23   5  -6   -3.60   15.00
  23   5  -6  -41.10   18.60
 -23   5   6  -19.70   14.20
 -21  -5   6   23.60   14.50
 -21   5   6   18.50   13.00
  21   5  -6  -11.80   12.80
  21   5  -6   -6.40   17.10
  19  -5  -6    4.50    9.30
 -19  -5   6    5.60   12.00
 -19   5   6    4.20   11.20
  19   5  -6    8.70   15.80
  19   5  -6   10.70   12.60
 -17  -5   6   14.40   10.80
  17  -5  -6   -3.40    8.60
  17  -5  -6   12.50   11.80
  17  -5  -6    5.50    8.90
  17   5  -6   -8.50    9.70
 -17   5   6  -16.00    9.00
  17   5  -6   17.80   13.30
 -17   5   6   -1.60    7.40
  15  -5  -6   -6.40    8.10
  15  -5  -6    9.80    7.70
 -15  -5   6   -8.90    8.40
  15  -5  -6   -6.10    9.70
 -15   5   6    0.70    8.10
  15   5  -6   -9.40   10.90
  15   5  -6    2.20    9.20
 -15   5   6   -4.60    6.40
  13  -5  -6    0.50    8.30
  13  -5  -6   -3.30    7.70
 -13  -5   6    5.60    8.00
  13  -5  -6    4.70    6.60
 -13   5   6   -0.70    6.60
 -13   5   6   -7.00    5.80
  13   5  -6   -5.00    9.30
  13   5  -6   -1.80    7.80
  11  -5  -6   16.60    8.10
 -11  -5   6   16.70    7.90
  11  -5  -6   11.50    8.70
 -11  -5   6   25.40    4.10
  11   5  -6   18.50    9.50
 -11   5   6   19.10    6.80
  11   5  -6   21.40    7.50
 -11   5   6   27.80    6.70
  -9  -5   6  111.59    7.50
   9  -5  -6  149.79   14.20
  -9  -5   6  116.99   11.70
   9  -5  -6  137.49   13.40
  -9   5   6  134.69    9.00
   9   5  -6  124.99   10.40
   9   5  -6  142.59   13.50
  -9   5   6  129.29   11.30
  -7  -5   6  332.77   17.80
   7  -5  -6  320.67   18.70
  -7  -5   6  344.07   12.90
   7  -5  -6  357.86   18.80
  -7   5   6  336.07   12.10
  -7   5   6  378.46   17.40
   7   5  -6  329.77   14.70
   7   5  -6  331.97   17.50
  -5  -5   6   28.60    7.60
   5  -5  -6   45.00    9.00
  -5  -5   6   43.30    5.80
  -5   5   6   31.40    7.30
  -5   5   6   42.70    4.10
   5   5  -6   27.60    7.50
   5   5  -6   34.10    6.20
  -5   5   6   44.80    7.50
  -3  -5   6   97.09   10.10
  -3  -5   6   92.89    8.30
   3  -5  -6   93.99   10.70
   3   5  -6  100.19    7.90
   3   5  -6   91.39    9.00
  -3   5   6   92.69   10.80
   3   5  -6   90.89    7.60
  -3   5   6  110.59   10.80
  -1  -5   6   66.19    7.60
   1  -5  -6   59.79    8.80
   1  -5  -6   60.09    4.90
  -1  -5   6   60.29    8.50
  -1   5   6   57.69    8.30
   1   5  -6   61.99    7.20
   1   5  -6   68.19   10.30
   1   5  -6   56.99    6.30
  -1   5   6   62.89   10.00
   1   5  -6   61.49    6.40
  -1  -5  -6    8.40    4.10
   1  -5   6    5.10    5.50
   1  -5   6    5.70    6.40
  -1  -5  -6    4.50    6.50
   1   5   6    7.20    8.10
  -1   5  -6    6.30    7.10
   1   5   6   19.40    7.30
  -1   5  -6    7.70    4.60
  -1   5  -6   13.10    4.30
  -3  -5  -6    3.30    6.50
   3  -5   6    9.10    6.30
   3  -5   6    9.70    6.90
  -3  -5  -6   -5.50    4.70
   3   5   6   14.20    8.90
  -3   5  -6    9.10    4.40
   3   5   6    4.70    6.50
  -3   5  -6   -9.60    6.80
  -3   5  -6    6.70    4.00
  -5  -5  -6   32.40    8.20
  -5  -5  -6   25.50    6.20
   5  -5   6   20.00    7.50
   5  -5   6   26.60    8.00
  -5   5  -6    9.80    8.70
  -5   5  -6   36.60    6.00
   5   5   6   26.30   11.30
  -7  -5  -6   29.90    7.40
  -7  -5  -6   32.10    8.50
   7  -5   6    6.40    7.70
   7   5   6   21.70   12.30
  -7   5  -6   18.80    9.60
  -9  -5  -6  227.08   17.00
  -9  -5  -6  232.78   15.50
   9  -5   6  224.18   16.40
   9   5   6  238.08   26.10
  -9   5  -6  203.08   18.20
 -11  -5  -6  242.78   18.60
 -11  -5  -6  257.07   18.90
  11  -5   6  197.38   16.80
  11   5   6  262.37   28.50
 -11   5  -6  254.67   20.90
 -13  -5  -6    0.90   10.50
  13  -5   6   12.20   10.90
 -13  -5  -6   17.90   10.40
 -13   5  -6    6.60   13.10
  13   5   6  -15.40   15.40
 -15  -5  -6    1.70   10.90
 -15  -5  -6    9.90   12.60
  15  -5   6   -7.50   11.80
 -15   5  -6   -1.20   14.80
  15   5   6    6.70   19.00
 -17  -5  -6   -5.60   11.60
  17  -5   6    9.80   12.90
 -17  -5  -6    7.40   14.30
 -17   5  -6   45.10   18.90
  17   5   6   38.80   23.00
 -19  -5  -6   23.30   16.90
  19  -5   6    4.60   14.20
 -19   5  -6   -4.70   18.60
  19   5   6  -29.60   21.40
  21  -5   6   27.60   16.40
 -21  -5  -6  -22.80   18.10
 -21   5  -6    0.80   21.40
 -21   5  -6   -3.30   15.80
  21   5   6   -3.80   23.00
 -26  -6   6  -16.20   20.30
 -26   6   6  -17.00   17.40
  26   6  -6  -28.30   24.60
 -24  -6   6   18.10   18.70
  24   6  -6  -16.30   23.80
  24   6  -6  -21.50   16.70
 -24   6   6  -22.20   15.10
 -22  -6   6   83.89   19.20
  22   6  -6   74.89   25.90
  22   6  -6   73.19   18.70
 -22   6   6   48.40   16.20
 -20  -6   6  130.19   19.10
  20  -6  -6  170.38   16.70
  20   6  -6  130.09   24.30
 -20   6   6  141.59   17.70
  20   6  -6  124.49   18.70
  18  -6  -6  425.66   23.70
 -18  -6   6  403.06   27.10
  18   6  -6  350.56   25.80
  18   6  -6  336.07   30.70
 -18   6   6  419.56   25.10
  16  -6  -6   98.79   15.10
  16  -6  -6  102.69   13.80
  16  -6  -6  105.69   16.70
 -16  -6   6  124.99   15.60
  16   6  -6  101.19   15.00
  16   6  -6   83.99   18.20
 -16   6   6   90.39   11.20
 -16   6   6  101.09   13.10
 -14  -6   6    3.90    9.20
  14  -6  -6    1.90    7.50
  14  -6  -6  -12.90    8.90
  14  -6  -6   -3.20   10.30
 -14   6   6   -0.30    8.20
  14   6  -6   -6.10    9.40
  14   6  -6    1.60   12.00
 -14   6   6   -0.60    7.00
  12  -6  -6   16.20    9.80
 -12  -6   6    1.00    8.30
  12  -6  -6   13.30    9.80
  12   6  -6    8.70    8.40
 -12   6   6   -2.60    6.90
  12   6  -6  -12.10   10.20
 -12   6   6    1.40    6.90
  10  -6  -6  169.88   14.80
 -10  -6   6  172.48   14.70
 -10  -6   6  131.69    9.80
  10  -6  -6  150.98   15.70
 -10   6   6  162.28   10.90
  10   6  -6  133.09   15.50
  10   6  -6  139.29   12.40
 -10   6   6  152.78   12.90
   8  -6  -6  225.38   16.70
   8  -6  -6  226.48   17.90
  -8  -6   6  235.38   17.00
  -8  -6   6  220.18   11.90
  -8   6   6  215.68   11.50
  -8   6   6  247.88   15.50
   8   6  -6  206.38   14.30
   8   6  -6  215.98   17.30
  -6  -6   6  247.08   12.80
  -6  -6   6  273.77   17.30
   6  -6  -6  209.08   17.00
  -6   6   6  206.88   10.60
   6   6  -6  245.88   13.90
  -6   6   6  233.78   15.40
   6   6  -6  228.58   16.40
  -6   6   6  273.97   16.00
   4  -6  -6  544.55   16.00
  -4  -6   6  611.14   24.00
  -4  -6   6  551.04   20.60
   4  -6  -6  551.24   24.50
  -4   6   6  567.14   17.30
   4   6  -6  594.04   20.60
   4   6  -6  553.64   19.90
   4   6  -6  541.45   22.70
  -4   6   6  531.75   24.10
  -4   6   6  580.14   23.50
  -2  -6   6  141.29   12.40
  -2  -6   6  141.69   11.20
   2  -6  -6  140.59   13.60
   2  -6  -6  136.39    8.00
   2   6  -6  169.58   15.40
   2   6  -6  122.39    9.50
   2   6  -6  143.19   10.50
   2   6  -6  135.59   11.50
  -2   6   6  119.19   11.90
  -2   6   6  171.78   15.10
  -2   6   6  135.29    8.70
   0  -6   6   28.30    7.70
   0  -6   6   43.00    8.40
   0  -6  -6   28.70    5.20
   0  -6  -6   27.00    8.20
   0   6  -6   44.50    6.60
   0   6  -6   21.10    6.70
   0   6   6   18.80    9.70
   0   6   6   31.60    8.20
   0   6  -6   19.20    5.90
   0   6  -6   24.10    9.00
   2  -6   6  256.27   15.80
   2  -6   6  247.08   16.20
  -2  -6  -6  242.08   16.40
  -2  -6  -6  226.38   12.20
   2   6   6  217.28   19.20
  -2   6  -6  237.98   12.30
  -2   6  -6  236.58   12.40
  -2   6  -6  243.58   17.90
   2   6   6  228.78   16.10
   4  -6   6  324.57   18.40
  -4  -6  -6  345.17   15.90
   4  -6   6  391.56   19.10
  -4  -6  -6  311.97   19.00
   4   6   6  295.17   23.10
  -4   6  -6  326.37   21.00
  -6  -6  -6  430.56   21.50
  -6  -6  -6  453.45   19.20
   6  -6   6  445.26   21.60
   6  -6   6  421.86   21.60
   6   6   6  394.86   27.40
  -6   6  -6  400.86   24.10
   8  -6   6   93.79   12.70
  -8  -6  -6   94.39   11.20
  -8  -6  -6   76.99   11.90
  -8   6  -6   74.29   14.00
   8   6   6  101.49   18.50
  10  -6   6    2.80   10.00
 -10  -6  -6   -1.90    9.60
 -10  -6  -6   -7.30    9.10
  10   6   6   -0.20   14.10
 -10   6  -6    2.80   11.60
 -12  -6  -6  -17.00    9.70
  12  -6   6  -15.70   10.10
 -12  -6  -6  -12.80    9.50
 -12   6  -6    2.30   13.20
  12   6   6    4.40   16.60
 -14  -6  -6   12.70   12.30
  14  -6   6   15.30   13.00
 -14  -6  -6   24.90   11.80
  14   6   6   30.90   21.30
 -14   6  -6   54.39   17.60
 -16  -6  -6   -7.60   11.70
 -16  -6  -6   -8.40   13.50
  16  -6   6   21.60   14.20
  16   6   6  -11.40   19.80
 -16   6  -6  -12.70   16.80
 -18  -6  -6   26.00   16.20
  18  -6   6   40.20   16.00
  18   6   6    9.40   25.00
 -18   6  -6   -8.30   19.50
  20  -6   6   -7.00   15.30
 -20  -6  -6    6.40   16.80
  20   6   6   22.40   26.30
 -20   6  -6   14.70   22.00
 -25  -7   6   12.60   20.60
  25   7  -6  -23.90   26.00
  25   7  -6   -4.10   23.50
 -23  -7   6   58.59   21.00
  23   7  -6  103.09   29.80
  23   7  -6   37.50   19.10
  21  -7  -6  136.29   17.80
 -21  -7   6  111.49   20.80
  21   7  -6  118.19   27.80
  21   7  -6  120.69   20.60
  19  -7  -6  141.49   17.30
 -19  -7   6  180.58   21.50
  19   7  -6  141.79   19.40
  19   7  -6  173.88   27.10
 -19   7   6  158.18   20.00
 -17  -7   6  216.98   20.90
  17  -7  -6  248.38   20.10
  17   7  -6  148.69   24.20
  17   7  -6  196.38   20.40
 -17   7   6  219.98   18.80
  15  -7  -6   71.09   14.00
 -15  -7   6  104.09   15.40
 -15   7   6  103.49   13.40
  15   7  -6   96.09   14.50
  15   7  -6  109.09   20.10
  13  -7  -6   41.30   12.10
  13  -7  -6   45.20   13.00
 -13  -7   6   24.40   11.60
  13   7  -6   73.19   16.90
 -13   7   6   52.69    9.70
 -13   7   6   20.60    9.10
  13   7  -6   33.00   11.00
  11  -7  -6   67.89   13.60
  11  -7  -6   66.99   13.90
 -11  -7   6   64.69   12.10
 -11   7   6   56.59    9.40
  11   7  -6   58.79   14.80
 -11   7   6   69.39   10.60
  11   7  -6   61.19   11.10
  -9  -7   6   17.90    9.40
  -9  -7   6   15.40    7.10
   9  -7  -6   20.10   10.90
   9  -7  -6   31.70   11.10
  -9   7   6   30.50    8.90
   9   7  -6   11.50    8.60
   9   7  -6   12.90   11.60
  -9   7   6   20.30    7.10
   7  -7  -6  294.87   21.10
  -7  -7   6  285.67   16.10
  -7  -7   6  293.87   19.50
   7  -7  -6  273.57   20.90
   7   7  -6  290.77   17.00
   7   7  -6  286.27   20.70
  -7   7   6  261.07   13.70
  -7   7   6  273.97   18.00
  -7   7   6  313.47   18.80
   5  -7  -6  129.09   14.50
  -5  -7   6  127.69   11.90
  -5  -7   6  124.69   13.50
   5  -7  -6  127.49    8.60
   5   7  -6  104.39   10.80
  -5   7   6  111.09    8.80
   5   7  -6  127.89   14.20
  -5   7   6  147.29   14.30
  -5   7   6  145.09   14.50
  -3  -7   6   27.10    8.20
   3  -7  -6   36.80    5.50
   3  -7  -6   40.30   10.50
  -3  -7   6   32.90    9.40
  -3   7   6   36.80    6.40
  -3   7   6   42.50   10.60
   3   7  -6   32.80    9.90
  -3   7   6   30.80    9.10
   3   7  -6   46.00    8.50
   3   7  -6   23.60   10.20
   1  -7  -6   14.60    9.10
   1  -7  -6   26.40    5.50
  -1  -7   6   12.40    8.20
  -1  -7   6    8.20    7.80
   1   7  -6   11.90    6.60
   1   7  -6   21.60    8.90
   1   7  -6   10.80    9.20
  -1   7   6    4.50    9.40
  -1   7   6   13.00    8.60
  -1  -7  -6  356.36   15.50
   1  -7   6  385.86   20.70
  -1  -7  -6  360.16   21.30
   1  -7   6  375.86   19.90
  -1   7  -6  368.76   22.80
  -1   7  -6  377.76   17.20
   1   7   6  362.16   24.10
  -1   7  -6  378.76   19.40
   3  -7   6  481.35   23.80
   3  -7   6  467.25   23.10
  -3  -7  -6  483.15   24.60
  -3  -7  -6  488.45   19.40
  -3   7  -6  484.25   26.00
   3   7   6  491.45   28.90
  -5  -7  -6 1120.09   37.80
   5  -7   6 1106.19   37.60
  -5  -7  -6 1057.59   33.60
   5  -7   6 1097.39   37.00
  -5   7  -6 1095.19   41.00
   5   7   6  998.70   44.70
  -7  -7  -6  568.34   24.10
   7  -7   6  516.85   26.30
   7  -7   6  553.34   25.90
  -7  -7  -6  531.55   26.40
  -7   7  -6  524.45   29.30
   7   7   6  549.65   35.00
  -9  -7  -6  778.22   29.90
  -9  -7  -6  729.83   31.40
   9  -7   6  721.23   32.80
   9   7   6  793.22   43.10
  -9   7  -6  780.92   35.90
  11  -7   6   16.60   12.40
 -11  -7  -6   30.90   12.00
 -11  -7  -6    0.30   10.90
  11   7   6    9.60   17.10
 -11   7  -6   16.40   15.00
 -13  -7  -6   -5.20   12.00
  13  -7   6  -16.00   11.80
 -13  -7  -6   13.80   12.30
  13   7   6   -1.60   18.40
 -13   7  -6  -21.90   14.80
 -15  -7  -6   69.79   16.20
 -15  -7  -6   86.09   16.10
  15  -7   6   82.89   17.50
  15   7   6   73.69   25.60
 -15   7  -6   52.69   20.40
 -17  -7  -6   37.30   16.70
  17  -7   6   38.40   16.10
  17   7   6   52.59   26.60
 -17   7  -6   23.30   21.60
 -19  -7  -6    2.00   18.00
  19  -7   6   14.30   16.30
  19   7   6   44.30   27.70
 -19   7  -6   -3.00   22.10
 -24  -8   6   -7.00   20.20
  24   8  -6  -41.30   24.70
  24   8  -6   -9.30   19.90
 -22  -8   6   56.99   20.70
  22   8  -6   44.00   26.50
  22   8  -6   27.70   18.20
  20  -8  -6  133.09   18.60
 -20  -8   6  109.49   20.50
  20   8  -6   60.99   19.10
  20   8  -6   46.00   25.30
 -18  -8   6  122.69   19.60
  18  -8  -6   83.89   16.40
  18   8  -6  103.19   18.30
  18   8  -6  108.99   25.70
 -16  -8   6  109.59   18.00
  16  -8  -6   98.49   16.40
  16   8  -6   98.19   17.10
  16   8  -6   81.19   22.40
 -14  -8   6  102.59   16.10
  14  -8  -6   97.29   16.50
  14   8  -6   98.29   16.10
  14   8  -6   57.99   19.80
 -12  -8   6    8.10   11.60
  12  -8  -6    1.20   12.30
  12   8  -6   38.70   17.30
 -12   8   6   11.40    8.80
  12   8  -6   31.00   11.90
  10  -8  -6  379.76   25.80
  10  -8  -6  392.46   25.90
 -10  -8   6  396.26   25.00
  10   8  -6  377.96   29.10
  10   8  -6  351.56   22.10
 -10   8   6  363.96   20.20
  -8  -8   6  -15.70    8.80
  -8  -8   6   -0.10    7.90
   8  -8  -6    1.20   10.60
   8   8  -6   -9.50   12.60
   8   8  -6    7.10    9.30
  -8   8   6   14.50    9.00
  -6  -8   6   28.60   10.80
   6  -8  -6   29.30   11.60
  -6  -8   6   20.50    9.00
   6   8  -6   26.30   13.20
  -6   8   6   12.80    9.40
   6   8  -6   42.20   10.00
  -4  -8   6    5.10    9.00
  -4  -8   6   -5.80    7.60
   4  -8  -6   16.90   10.10
   4   8  -6    3.10   11.90
  -4   8   6   -3.30    9.50
   4   8  -6   -0.10    7.80
  -2  -8   6  113.19   13.80
  -2  -8   6  111.49   13.30
   2  -8  -6   96.59   14.30
   2   8  -6  118.39   16.20
   2   8  -6  124.09   16.50
   2   8  -6   98.29   11.50
  -2   8   6   92.99   14.40
   0  -8   6    1.10    8.30
   0  -8  -6    8.30    9.90
   0  -8   6    1.00    8.70
   0   8  -6   11.50    7.70
   0   8  -6  -20.50   16.80
   0   8   6   13.80   11.80
   0   8  -6  -14.40    9.90
   2  -8   6  194.68   16.40
   2  -8   6  210.08   17.70
  -2  -8  -6  238.68   19.40
  -2   8  -6  257.17   21.50
  -2   8  -6  249.38   16.50
   2   8   6  232.08   22.20
  -4  -8  -6  276.87   21.10
   4  -8   6  252.67   18.70
   4  -8   6  280.67   20.90
  -4   8  -6  283.07   23.10
   4   8   6  293.87   26.40
   6  -8   6   32.50   12.30
   6  -8   6   48.00   12.30
  -6  -8  -6   41.30   12.60
   6   8   6   55.69   16.30
  -6   8  -6   74.79   16.60
  -8  -8  -6  233.68   20.10
  -8  -8  -6  194.68   21.90
   8  -8   6  194.28   17.70
   8  -8   6  195.48   19.90
  -8   8  -6  204.18   22.20
   8   8   6  242.18   27.30
 -10  -8  -6   25.00   13.20
  10  -8   6    9.40   12.50
 -10  -8  -6   11.20   14.40
  10   8   6   31.90   20.30
 -10   8  -6    2.50   15.40
 -12  -8  -6  -19.60   17.20
 -12  -8  -6   -6.80   12.60
  12  -8   6    7.20   13.70
 -12   8  -6   -1.80   16.50
  12   8   6    6.60   18.60
  14  -8   6    1.30   15.00
 -14  -8  -6   -4.90   13.30
 -14   8  -6  -30.40   17.30
  14   8   6   34.10   22.20
  16  -8   6   12.80   16.80
 -16   8  -6    5.60   20.50
  16   8   6   36.60   25.90
  18  -8   6   17.70   17.70
 -18   8  -6  -20.10   21.90
  18   8   6   22.90   24.60
 -23  -9   6  -39.10   19.40
  23   9  -6    7.80   20.40
  23   9  -6   -5.20   26.50
  21  -9  -6    3.20   15.50
 -21  -9   6   29.90   19.50
  21   9  -6  -21.90   24.50
  21   9  -6   -5.60   18.80
 -19  -9   6   30.90   18.40
  19  -9  -6   17.60   14.90
  19   9  -6   -7.80   17.40
  19   9  -6  -14.60   21.90
 -17  -9   6   26.90   16.50
  17  -9  -6    5.20   14.40
  17   9  -6  -21.20   20.60
  17   9  -6    0.80   16.10
 -15  -9   6   21.30   14.80
  15  -9  -6   17.30   14.70
  15   9  -6    1.50   14.10
  15   9  -6   27.60   21.30
 -13  -9   6   -4.50   13.60
  13  -9  -6    9.30   13.50
  13   9  -6    0.90   13.40
  13   9  -6  -13.20   17.60
  11  -9  -6  402.26   28.00
 -11  -9   6  333.67   24.20
 -11   9   6  335.07   21.10
  11   9  -6  347.77   25.00
   9  -9  -6   68.39   15.30
  -9  -9   6   65.79   15.80
  -9  -9   6   65.99   14.40
   9   9  -6   52.69   13.60
   9   9  -6   70.19   20.10
  -9   9   6   68.59   12.50
  -7  -9   6  592.74   29.60
  -7  -9   6  562.84   27.20
   7  -9  -6  551.54   31.10
  -7   9   6  533.05   26.60
   7   9  -6  572.44   27.00
   7   9  -6  508.85   35.00
   5  -9  -6  143.99   18.00
  -5  -9   6  129.09   15.50
  -5  -9   6  125.89   15.40
  -5   9   6  138.99   17.00
   5   9  -6  150.98   15.50
   5   9  -6  159.18   21.20
   3  -9  -6  322.97   24.80
  -3  -9   6  343.47   23.10
  -3  -9   6  345.67   24.50
   3   9  -6  375.66   21.80
  -3   9   6  327.27   24.00
   3   9  -6  357.16   26.80
   3   9  -6  358.06   26.90
   1  -9  -6   88.69   15.70
  -1  -9   6   64.89   13.40
  -1  -9   6  109.49   14.20
   1   9  -6  104.79   13.10
  -1   9   6   61.99   14.90
   1   9  -6   94.49   17.10
  -1  -9  -6   -6.70   10.70
   1  -9   6    7.70   10.20
   1  -9   6   -0.20   10.60
   1   9   6   15.30   13.40
  -1   9  -6   15.80    9.60
  -1   9  -6    1.30   12.30
   3  -9   6  -16.50   10.00
  -3  -9  -6    4.80   11.80
   3  -9   6   15.60   10.70
  -3   9  -6   11.10   14.10
   3   9   6  -11.10   13.20
  -3   9  -6    8.10    9.70
  -5  -9  -6   18.20   13.10
   5  -9   6   -4.60   11.70
   5  -9   6   -0.70   10.90
  -5   9  -6   -3.20   14.50
   5   9   6   30.40   16.50
   7  -9   6  -15.50   12.10
  -7  -9  -6   -6.00   13.00
   7  -9   6   -8.50   10.70
   7   9   6  -34.90   13.50
  -7   9  -6   15.30   15.70
   9  -9   6    0.10   13.80
  -9  -9  -6   37.20   15.00
   9   9   6   42.20   20.70
  -9   9  -6   26.10   17.00
  11  -9   6   38.10   16.20
 -11  -9  -6   42.40   16.00
  11   9   6   29.80   19.70
 -11   9  -6   39.90   19.80
  13  -9   6   24.00   16.80
 -13  -9  -6   46.20   16.20
  13   9   6   28.60   22.30
 -13   9  -6   16.80   19.60
  15  -9   6   -2.00   16.70
  15   9   6   34.20   23.90
 -15   9  -6    9.30   21.10
 -17   9  -6   87.59   26.00
  20 -10  -6   20.70   16.80
 -20 -10   6   20.60   19.80
  20  10  -6  -19.30   24.50
  20  10  -6   16.50   19.30
 -18 -10   6   30.90   19.30
  18 -10  -6    3.20   15.60
  18  10  -6   25.10   25.00
  18  10  -6   13.40   17.70
 -16 -10   6   24.00   16.80
  16 -10  -6   19.00   15.40
  16  10  -6  -10.40   21.60
  16  10  -6    6.10   15.60
 -14 -10   6    1.20   15.20
  14 -10  -6  -11.80   13.50
  14  10  -6   19.70   15.50
  14  10  -6  -33.60   18.90
 -12 -10   6   24.70   15.60
  12 -10  -6   48.40   16.40
  12  10  -6   37.20   22.40
  12  10  -6   51.99   16.10
 -10 -10   6  159.88   19.60
  10 -10  -6  164.98   21.10
  10  10  -6  160.08   25.90
  10  10  -6  194.98   20.00
  -8 -10   6  288.47   23.20
   8 -10  -6  269.17   24.20
  -8 -10   6  345.47   24.00
   8  10  -6  297.87   22.50
   8  10  -6  249.38   28.00
  -8  10   6  301.47   22.30
  -6 -10   6  563.84   29.30
  -6 -10   6  500.35   29.50
   6 -10  -6  556.24   33.20
   6  10  -6  537.75   35.60
   6  10  -6  528.45   28.60
  -6  10   6  498.75   28.50
  -4 -10   6  310.87   23.30
  -4 -10   6  329.77   25.00
   4 -10  -6  339.47   26.30
   4  10  -6  316.07   27.10
   4  10  -6  323.87   24.20
  -4  10   6  388.96   26.90
   4  10  -6  350.56   28.10
  -2 -10   6   27.40   12.60
   2 -10  -6   38.40   14.60
  -2 -10   6    9.40   11.50
   2  10  -6   19.30   12.00
   2  10  -6   14.80   15.30
  -2  10   6   33.40   14.40
   0 -10  -6    5.00   12.40
   0 -10   6    9.90   11.00
   0 -10   6   10.50   12.10
   0  10   6   -1.00   13.50
   0  10  -6  -20.70   10.40
   0  10  -6   -8.70   13.60
   2 -10   6   40.20   14.40
   2 -10   6   30.80   12.40
  -2 -10  -6   63.29   15.80
   2  10   6   40.20   16.70
  -2  10  -6   11.90   15.10
  -2  10  -6   32.80   12.40
   4 -10   6   23.50   14.10
  -4 -10  -6   20.70   14.30
   4 -10   6   31.50   12.60
   4  10   6   19.30   15.70
  -4  10  -6   11.90   16.00
  -4  10  -6   11.70   11.60
  -6 -10  -6   31.20   15.00
   6 -10   6   14.00   14.20
   6 -10   6   27.50   12.90
   6  10   6   44.90   19.40
  -6  10  -6   44.50   18.10
   8 -10   6  -22.60   12.90
   8 -10   6   23.30   13.40
  -8 -10  -6    9.70   15.10
   8  10   6   21.50   18.70
  -8  10  -6   -3.30   17.60
  10 -10   6    5.30   15.50
 -10 -10  -6    6.00   15.80
  10  10   6   18.50   20.40
 -10  10  -6   61.99   20.60
 -12 -10  -6   36.30   17.50
  12 -10   6   13.20   17.40
  12  10   6   72.09   24.20
 -12  10  -6   31.60   20.90
  14 -10   6  104.29   21.60
  14  10   6  107.19   27.60
 -14  10  -6  112.49   25.80
 -19 -11   6   15.20   20.50
  19 -11  -6   15.00   18.30
  19  11  -6   -1.40   20.60
  19  11  -6  -23.80   23.70
 -17 -11   6    6.80   19.60
  17 -11  -6    5.10   16.60
  17  11  -6  -11.00   22.60
  17  11  -6    4.00   18.50
  15 -11  -6   49.10   19.10
 -15 -11   6   41.30   19.00
  15  11  -6   12.80   18.20
  15  11  -6   18.60   23.10
  13 -11  -6  -18.00   14.70
 -13 -11   6  -13.90   15.60
  13  11  -6   15.90   16.40
  13  11  -6  -20.00   19.40
  11 -11  -6   84.69   18.80
 -11 -11   6   77.79   18.60
  11  11  -6   74.39   17.70
  11  11  -6   44.40   22.50
   9 -11  -6  102.39   19.40
  -9 -11   6  105.59   19.30
   9  11  -6  111.69   18.60
   9  11  -6  115.89   24.40
  -7 -11   6  124.89   18.70
  -7 -11   6  113.39   17.40
   7 -11  -6  121.89   19.60
  -7  11   6  105.79   16.40
   7  11  -6  128.69   18.40
   7  11  -6   68.49   20.20
  -5 -11   6   91.09   17.00
  -5 -11   6   93.89   18.00
   5 -11  -6  115.89   19.50
  -5  11   6  124.69   19.00
   5  11  -6  108.39   17.40
   5  11  -6  130.99   21.90
  -3 -11   6  206.98   20.40
   3 -11  -6  214.08   23.50
  -3 -11   6  236.08   23.30
  -3  11   6  214.88   22.90
   3  11  -6  262.97   22.40
   3  11  -6  207.38   24.60
  -1 -11   6   44.30   15.30
   1 -11  -6   53.69   16.90
  -1 -11   6   41.10   14.40
   1  11  -6   52.29   14.80
   1  11  -6   37.40   18.30
  -1  11   6   43.60   17.20
   1 -11   6    6.20   13.40
  -1 -11  -6   25.10   15.60
   1 -11   6   28.20   13.40
   1  11   6   27.20   16.90
  -1  11  -6   26.80   17.90
  -1  11  -6   21.50   13.80
   3 -11   6    3.20   12.50
  -3 -11  -6   -1.90   14.60
   3 -11   6   14.20   14.20
  -3  11  -6    4.30   16.80
  -3  11  -6    2.00   13.40
   3  11   6  -19.20   15.60
  -5 -11  -6   -8.30   14.90
   5 -11   6   -2.50   14.40
   5 -11   6  -13.40   12.10
   5  11   6    5.10   16.60
  -5  11  -6    8.90   18.20
  -5  11  -6    0.20   13.50
   7 -11   6   13.60   16.10
  -7 -11  -6  -14.00   15.20
   7 -11   6  -10.80   12.90
  -7  11  -6  -19.60   18.40
  -7  11  -6   13.20   14.10
   7  11   6    5.60   18.50
   9 -11   6   -3.50   14.00
   9 -11   6   16.90   17.30
  -9 -11  -6   -9.50   16.40
  -9  11  -6   34.20   20.00
   9  11   6   32.90   20.60
 -11 -11  -6  -10.20   16.90
  11 -11   6   19.90   18.00
  11  11   6   12.10   21.00
 -11  11  -6   20.70   21.70
  13 -11   6   13.40   18.60
  13  11   6   29.10   24.80
 -13  11  -6   46.30   24.00
 -16 -12   6   -7.30   19.60
  16 -12  -6   27.50   19.00
  16  12  -6  -15.10   23.50
  16  12  -6   11.60   19.80
  14 -12  -6   13.70   17.90
 -14 -12   6   51.49   20.30
  14  12  -6   -7.50   21.70
  14  12  -6    1.90   18.60
  12 -12  -6   11.60   17.60
 -12 -12   6   22.40   18.30
  12  12  -6   43.10   18.90
  12  12  -6  -11.10   21.80
 -10 -12   6   15.70   17.60
  10 -12  -6   29.70   18.00
  10  12  -6   50.29   18.80
  10  12  -6   36.70   21.70
   8 -12  -6   -2.90   15.80
  -8 -12   6   14.00   16.70
   8  12  -6  -17.00   18.10
   8  12  -6   15.50   16.80
  -6 -12   6   -2.40   12.80
   6 -12  -6  -26.80   14.30
  -6 -12   6   35.80   16.80
   6  12  -6  -21.50   17.30
   6  12  -6   11.90   14.80
  -4 -12   6   18.40   14.60
   4 -12  -6  -18.60   14.60
  -4 -12   6   27.60   14.30
   4  12  -6   28.60   15.40
   4  12  -6  -17.20   17.50
  -4  12   6   22.30   15.40
   2 -12  -6   -1.40   16.20
  -2 -12   6   22.10   14.70
  -2 -12   6   41.20   14.60
  -2  12   6   17.10   15.80
   2  12  -6   18.30   15.60
   2  12  -6   47.90   20.40
   0 -12   6   31.20   16.00
   0 -12   6   21.30   14.40
   0 -12  -6   25.70   17.20
   0  12  -6   -1.70   18.20
   0  12   6   20.20   17.30
   0  12  -6   15.80   15.20
  -2 -12  -6   -9.80   15.80
   2 -12   6    1.40   15.10
   2 -12   6    9.70   14.60
  -2  12  -6    1.40   14.60
  -2  12  -6   16.40   20.00
   2  12   6  -13.10   16.10
   4 -12   6   83.19   17.50
   4 -12   6   77.99   19.60
  -4 -12  -6   45.60   18.10
  -4  12  -6   89.59   18.40
   4  12   6  108.39   23.40
  -4  12  -6   71.59   22.60
   6 -12   6   23.80   15.30
   6 -12   6   21.30   17.90
  -6 -12  -6   35.10   18.80
  -6  12  -6   -8.40   20.10
   6  12   6   43.60   21.20
  -6  12  -6   22.40   17.00
  -8 -12  -6   23.10   19.00
   8 -12   6   41.80   17.20
   8 -12   6   54.09   19.50
   8  12   6   56.89   23.30
  -8  12  -6   35.40   22.60
  -8  12  -6   70.89   18.90
  10 -12   6   26.00   19.20
 -10 -12  -6   39.80   20.80
 -10  12  -6   15.00   22.10
  10  12   6   38.60   22.60
  13 -13  -6   41.90   20.50
 -13 -13   6   33.90   20.90
  13  13  -6    8.10   23.20
  13  13  -6   40.10   20.30
  11 -13  -6    8.10   18.40
 -11 -13   6   40.00   20.50
  11  13  -6   48.60   23.00
  11  13  -6   10.10   18.40
  -9 -13   6   16.50   18.90
   9 -13  -6    1.00   17.70
   9  13  -6   -8.30   17.70
  -7 -13   6   97.49   21.60
   7 -13  -6   23.40   18.00
   7  13  -6   98.79   23.30
   5 -13  -6   32.70   18.40
  -5 -13   6   37.10   16.10
  -5 -13   6   11.40   15.60
   5  13  -6   -5.20   16.40
   5  13  -6    7.90   20.00
  -3 -13   6   10.40   15.50
  -3 -13   6   48.20   16.70
   3 -13  -6   22.80   18.10
   3  13  -6   11.70   16.90
  -3  13   6    1.90   16.50
   3  13  -6   40.00   22.10
  -1 -13   6   -0.20   14.80
  -1 -13   6   10.90   15.70
   1  13  -6   35.10   18.30
   1  13  -6   37.00   21.70
  -1  13   6   10.70   17.40
   1 -13   6   51.59   18.60
  -1 -13  -6    4.40   18.00
   1 -13   6   21.10   15.60
   1  13   6    6.50   18.40
  -1  13  -6   59.29   19.60
  -1  13  -6   20.90   21.70
  -3 -13  -6   10.90   19.10
   3 -13   6   48.20   19.00
   3 -13   6   20.10   16.50
  -3  13  -6   46.10   18.90
  -3  13  -6   36.80   23.40
   3  13   6   56.09   21.20
   5 -13   6  118.49   22.90
  -5 -13  -6   56.69   21.40
   5 -13   6  108.29   20.00
  -5  13  -6   99.59   26.40
  -5  13  -6  112.59   21.80
   5  13   6  148.49   26.30
  -7 -13  -6   29.70   20.50
   7 -13   6   -7.10   16.20
   7 -13   6   40.40   20.90
   7  13   6   26.20   21.40
  -7  13  -6  -11.40   22.10
  -7  13  -6   27.20   18.90
   8 -14  -6  -12.70   17.00
   6 -14  -6   24.20   19.20
  -6 -14   6   25.50   17.80
   6  14  -6   37.40   19.10
   6  14  -6   47.70   23.70
  -4 -14   6   50.19   17.80
   4 -14  -6    0.40   17.80
  -4 -14   6   21.00   17.80
   4  14  -6  -11.90   17.60
   4  14  -6   24.30   22.80
   2 -14  -6    3.90   18.30
  -2 -14   6   32.90   17.60
  -2 -14   6    5.30   16.70
   2  14  -6   18.60   19.60
   2  14  -6   -5.50   21.70
   0 -14   6  -13.90   16.00
   0 -14  -6    0.00   18.50
   0 -14   6   34.50   18.50
   0  14  -6   19.00   18.90
   0  14   6    5.70   18.90
   0  14  -6  -24.40   21.20
 -28   0   7   -5.10   17.60
 -26   0   7   -2.80   15.60
  26   0  -7   -7.30   17.50
 -24   0   7   -4.00   13.70
  24   0  -7  -17.50   13.80
  24   0  -7   26.80   15.00
 -22   0   7    7.70   11.20
  22   0  -7    0.60   12.60
  22   0  -7  -21.10   10.90
  20   0  -7    2.10   11.40
  20   0  -7    6.90   10.30
 -20   0   7   -3.70    9.50
  18   0  -7   -2.70    9.60
 -18   0   7   -4.80    8.50
  18   0  -7    4.20    9.50
 -18   0   7    0.60    8.00
 -16   0   7   -2.90    6.90
  16   0  -7   -2.50    6.90
 -16   0   7    7.20    7.60
  16   0  -7    4.90    8.00
  14   0  -7    9.20    7.40
 -14   0   7   -1.90    5.90
 -14   0   7    6.60    6.00
  14   0  -7    7.80    6.20
  12   0  -7   -2.90    5.00
  12   0  -7    6.00    6.30
 -12   0   7    1.20    4.90
 -12   0   7    1.80    5.30
  12   0  -7   -1.30    3.40
 -10   0   7    1.40    4.80
  10   0  -7    1.90    5.30
  10   0  -7    2.50    3.80
  10   0  -7    3.00    4.30
 -10   0   7    0.60    4.00
   8   0  -7    1.70    3.10
  -8   0   7    7.70    4.10
   8   0  -7    1.90    4.40
  -8   0   7    0.20    4.10
   8   0  -7    1.80    3.80
   6   0  -7    7.20    3.20
  -6   0   7    4.30    3.60
  -6   0   7    0.10    3.90
   6   0  -7    3.20    3.40
  -4   0   7   -3.50    3.70
   4   0  -7    3.30    3.60
  -4   0   7   -0.40    2.80
  -4   0   7    5.10    3.40
  -2   0   7   -1.40    2.70
  -2   0   7   10.70    4.30
   2   0  -7   -1.30    3.50
  -2   0   7   -2.00    3.40
   2   0  -7   -1.10    3.30
   0   0   7    0.10    3.90
   0   0  -7    3.30    3.10
   0   0  -7    4.50    3.80
   0   0   7    5.20    3.10
   0   0  -7    1.70    4.20
   0   0   7    5.50    4.30
  -2   0  -7    7.80    4.40
  -2   0  -7   -0.60    4.40
  -2   0  -7    5.90    3.60
   2   0   7   -3.30    4.10
   2   0   7   -3.20    3.80
  -4   0  -7   12.00    5.30
   4   0   7    0.00    5.00
  -4   0  -7    3.40    5.40
   4   0   7   -1.90    4.80
  -4   0  -7    3.00    4.20
  -6   0  -7    6.90    4.80
  -6   0  -7    7.20    6.00
   6   0   7   -3.80    5.50
  -6   0  -7   13.50    6.30
   6   0   7   -4.00    5.00
  -8   0  -7   -4.60    6.40
  -8   0  -7    3.70    7.10
   8   0   7    1.70    6.30
   8   0   7   -9.00    6.20
 -10   0  -7    8.70    8.00
  10   0   7    0.20    7.80
  10   0   7    2.70    7.10
 -10   0  -7   -1.00    7.60
  12   0   7    5.20    8.60
 -12   0  -7   11.70    9.60
  12   0   7    3.90    8.60
 -12   0  -7   -1.40    8.30
 -14   0  -7   -4.20    9.40
 -14   0  -7  -12.70   10.10
  14   0   7   -7.10    9.00
 -16   0  -7   23.10   13.40
  16   0   7   -0.60   10.30
 -16   0  -7   -1.40   10.10
 -18   0  -7   -1.60   11.70
  18   0   7    4.40   12.30
 -18   0  -7   -2.50   14.50
 -20   0  -7   -1.40   12.70
 -20   0  -7   14.90   17.20
  20   0   7   -9.70   13.30
 -29  -1   7   -8.30   18.20
 -29   1   7  -26.70   17.00
 -27  -1   7   18.90   17.20
 -27   1   7   -4.20   15.90
  27   1  -7   20.00   19.70
  25  -1  -7   67.79   19.20
 -25  -1   7   84.89   17.50
  25   1  -7   71.99   17.90
 -25   1   7   44.30   15.70
  25   1  -7   29.80   18.80
  23  -1  -7  152.38   19.20
 -23  -1   7  155.58   17.90
  23  -1  -7  112.09   18.60
  23   1  -7  103.09   19.40
 -23   1   7  160.48   18.20
  23   1  -7  125.69   18.40
 -21  -1   7   49.90   12.80
  21  -1  -7   53.29   13.60
  21  -1  -7   50.09   13.90
  21   1  -7   43.10   13.40
 -21   1   7   50.19   13.00
  21   1  -7   33.00   14.30
 -19  -1   7    4.00    9.20
  19  -1  -7    7.60   10.50
  19  -1  -7   14.60   10.40
  19   1  -7   -3.90    9.70
 -19   1   7    9.70    9.70
 -19   1   7   32.90   10.00
  19   1  -7   16.70   11.80
  17  -1  -7    3.40    8.40
 -17  -1   7   -6.80    7.50
  17  -1  -7   -3.40    8.90
 -17   1   7    3.80    7.50
  17   1  -7    4.70    9.20
  17   1  -7    7.80    9.10
 -17   1   7   -1.40    7.70
  15  -1  -7  452.65   14.70
 -15  -1   7  472.55   20.50
  15  -1  -7  460.75   20.70
 -15  -1   7  436.46   21.70
  15  -1  -7  442.26   20.40
  15   1  -7  439.96   21.70
 -15   1   7  447.76   19.30
  15   1  -7  442.86   19.90
 -15   1   7  422.06   20.20
 -13  -1   7  930.51   29.20
  13  -1  -7  882.21   25.50
  13  -1  -7  936.71   29.50
  13  -1  -7  862.51   28.50
 -13  -1   7  892.71   30.60
 -13   1   7  873.61   29.40
 -13   1   7  891.91   27.60
  13   1  -7  905.91   28.00
  13   1  -7  883.11   30.30
  11  -1  -7 1266.87   34.50
  11  -1  -7 1300.07   35.70
 -11  -1   7 1276.17   37.60
  11  -1  -7 1276.67   36.70
 -11  -1   7 1288.77   36.70
 -11   1   7 1275.67   37.00
 -11   1   7 1242.38   34.50
  11   1  -7 1258.17   34.70
  11   1  -7 1285.07   37.20
  -9  -1   7  779.32   24.50
  -9  -1   7  679.53   23.20
   9  -1  -7  770.82   23.90
   9  -1  -7  744.93   22.40
   9  -1  -7  699.83   22.00
  -9   1   7  737.13   24.20
   9   1  -7  762.82   24.10
   9   1  -7  717.43   19.10
  -9   1   7  714.13   21.50
   9   1  -7  723.83   21.10
   7  -1  -7  312.97   12.50
  -7  -1   7  317.97   13.50
   7  -1  -7  300.37   11.80
  -7  -1   7  298.77   13.10
  -7  -1   7  300.07   10.50
  -7   1   7  321.77   14.10
   7   1  -7  334.57   13.80
  -7   1   7  303.67   11.20
   7   1  -7  322.37   10.60
   7   1  -7  306.37   10.50
  -5  -1   7    7.70    3.90
   5  -1  -7    9.80    4.20
   5  -1  -7   11.40    3.90
  -5  -1   7   12.10    3.40
  -5  -1   7    1.90    3.90
   5   1  -7    5.70    4.20
  -5   1   7    9.10    4.40
   5   1  -7   12.80    3.60
  -5   1   7   13.10    2.90
   3  -1  -7   45.80    4.10
  -3  -1   7   43.00    5.00
   3  -1  -7   43.10    5.40
  -3  -1   7   44.00    5.90
  -3  -1   7   46.20    5.00
   3   1  -7   50.49    5.50
  -3   1   7   40.00    3.40
  -3   1   7   44.80    6.20
   3   1  -7   35.60    5.90
   1  -1  -7  784.82   21.90
  -1  -1   7  861.01   24.50
  -1  -1   7  840.92   24.00
  -1  -1   7  826.72   23.40
   1  -1  -7  841.92   23.30
   1  -1  -7  825.72   24.30
   1   1  -7  817.92   24.10
   1   1  -7  810.62   24.70
  -1   1   7  834.12   26.00
  -1   1   7  842.82   24.80
  -1  -1  -7  713.73   22.10
  -1  -1  -7  686.53   21.20
   1  -1   7  708.03   22.00
  -1  -1  -7  694.23   20.10
   1  -1   7  710.83   21.00
   1  -1   7  678.83   21.30
   1   1   7  726.23   23.60
  -1   1  -7  714.23   22.50
   1   1   7  683.63   22.30
  -1   1  -7  678.03   22.00
  -3  -1  -7  145.69    9.20
  -3  -1  -7  140.29   10.40
  -3  -1  -7  139.69    9.20
   3  -1   7  155.28   10.40
   3  -1   7  130.59    9.10
   3   1   7  137.39   10.20
   3   1   7  145.99   11.60
  -3   1  -7  136.19   10.20
  -3   1  -7  138.49    7.80
  -3   1  -7  128.59   10.10
  -5  -1  -7    6.00    5.20
   5  -1   7   -7.40    4.90
  -5  -1  -7    8.30    4.70
   5  -1   7   -2.80    4.30
  -5  -1  -7    6.30    5.60
  -5   1  -7   -2.60    5.30
  -5   1  -7    4.50    4.30
  -5   1  -7   -2.20    5.40
   5   1   7    2.30    5.50
   5   1   7   -4.80    5.20
   7  -1   7   56.89    8.40
  -7  -1  -7   42.80    8.10
   7  -1   7   55.19    7.40
  -7  -1  -7   57.49    8.30
  -7   1  -7   58.09    7.00
   7   1   7   60.09   10.10
  -7   1  -7   55.49    9.10
  -7   1  -7   64.29    9.20
   7   1   7   53.39    8.60
   9  -1   7  310.07   16.00
  -9  -1  -7  347.17   18.30
  -9  -1  -7  379.06   18.60
   9  -1   7  351.66   18.40
  -9   1  -7  389.06   19.20
   9   1   7  367.16   20.60
   9   1   7  345.27   18.40
  -9   1  -7  340.57   19.20
 -11  -1  -7  385.36   19.90
 -11  -1  -7  363.86   20.60
  11  -1   7  404.96   20.30
  11   1   7  420.16   23.50
  11   1   7  355.66   19.90
 -11   1  -7  425.06   21.20
 -11   1  -7  352.76   22.00
 -13  -1  -7  440.96   24.30
  13  -1   7  462.55   23.20
 -13  -1  -7  462.05   23.30
  13   1   7  417.86   23.00
 -13   1  -7  452.65   23.70
 -13   1  -7  437.26   25.90
  13   1   7  435.06   26.50
 -15  -1  -7   95.59   15.40
 -15  -1  -7  122.29   15.10
  15  -1   7  138.89   15.10
 -15   1  -7  105.89   14.20
  15   1   7  125.89   15.40
 -15   1  -7  123.19   17.20
 -17  -1  -7   20.00   14.10
  17  -1   7   30.90   12.90
 -17  -1  -7   13.60   11.70
  17   1   7   17.40   12.00
 -17   1  -7    5.20   11.70
 -17   1  -7   13.30   14.10
  19  -1   7   40.60   14.40
 -19  -1  -7   25.00   16.60
 -19  -1  -7   43.80   14.10
 -19   1  -7    5.60   16.70
 -19   1  -7   31.90   14.30
  19   1   7   24.80   13.60
 -21  -1  -7   13.70   17.90
  21  -1   7   14.30   14.70
 -21   1  -7   -8.20   13.80
 -21   1  -7   20.00   19.00
 -28  -2   7    7.40   18.40
 -28   2   7   19.20   18.40
  28   2  -7   30.50   25.30
 -26  -2   7  125.89   20.50
 -26   2   7  122.29   20.00
  26   2  -7  110.39   25.40
  26   2  -7  131.79   25.20
 -24  -2   7  172.88   20.40
 -24   2   7  141.79   18.50
  24   2  -7  135.69   20.40
  24   2  -7  173.48   24.80
  22  -2  -7  282.37   23.40
 -22  -2   7  325.47   23.40
  22  -2  -7  289.17   22.60
  22   2  -7  294.57   22.10
 -22   2   7  285.97   21.30
  22   2  -7  328.97   27.90
  20  -2  -7  178.58   18.50
  20  -2  -7  169.38   17.40
 -20  -2   7  188.28   17.80
  20   2  -7  168.48   20.20
 -20   2   7  160.68   15.60
 -20   2   7  201.58   18.50
  20   2  -7  170.78   17.80
  18  -2  -7    3.30    9.00
 -18  -2   7    1.00    8.90
  18  -2  -7    1.50   10.70
 -18   2   7   16.20    8.90
 -18   2   7   -0.80    7.70
  18   2  -7   -0.50    9.80
  18   2  -7   -2.30   11.00
  16  -2  -7  209.88   15.70
  16  -2  -7  221.18   12.10
 -16  -2   7  236.08   16.50
  16  -2  -7  186.98   14.80
  16   2  -7  211.88   18.20
  16   2  -7  244.48   16.90
 -16   2   7  208.58   15.40
 -16   2   7  223.98   15.10
 -14  -2   7  816.62   27.80
  14  -2  -7  762.42   27.10
  14  -2  -7  730.93   26.50
  14  -2  -7  781.72   24.30
 -14  -2   7  729.13   28.30
 -14   2   7  728.73   26.70
  14   2  -7  781.32   26.30
  14   2  -7  801.22   29.00
 -14   2   7  776.02   25.30
 -12  -2   7 1999.30   56.49
  12  -2  -7 2067.69   53.79
  12  -2  -7 2069.29   54.69
 -12  -2   7 2063.39   55.69
  12  -2  -7 2033.90   54.69
 -12   2   7 2084.09   55.39
  12   2  -7 2065.19   53.19
  12   2  -7 2121.29   56.59
 -12   2   7 2062.29   52.59
  10  -2  -7 1024.00   31.10
  10  -2  -7 1027.80   31.10
 -10  -2   7 1064.29   32.70
  10  -2  -7 1043.20   31.20
 -10  -2   7 1075.29   32.20
 -10   2   7 1053.69   28.60
  10   2  -7 1091.99   29.20
 -10   2   7 1038.10   31.90
  10   2  -7 1051.19   32.50
  -8  -2   7  140.19   10.50
  -8  -2   7  131.39    6.30
   8  -2  -7  156.88   10.30
  -8  -2   7  157.68   10.80
   8  -2  -7  141.79   10.20
   8   2  -7  145.29    7.90
   8   2  -7  135.89   10.30
  -8   2   7  134.99   10.40
   8   2  -7  136.79    6.60
  -8   2   7  142.49    7.20
   6  -2  -7  330.17   13.80
   6  -2  -7  321.37   13.00
  -6  -2   7  300.47   13.50
  -6  -2   7  298.47   13.80
  -6  -2   7  330.37   10.90
  -6   2   7  302.97   14.40
   6   2  -7  317.87   13.40
   6   2  -7  287.97   10.90
  -4  -2   7  402.86   13.40
  -4  -2   7  388.06   14.90
   4  -2  -7  417.26   14.80
  -4  -2   7  373.96   15.00
   4   2  -7  389.16   13.80
  -4   2   7  401.36   16.50
   4   2  -7  401.26   14.70
  -2  -2   7  799.12   23.00
   2  -2  -7  807.22   24.00
  -2  -2   7  755.22   23.50
  -2  -2   7  813.42   23.50
   2   2  -7  781.92   23.40
   2   2  -7  770.82   25.30
  -2   2   7  828.72   26.20
   2   2  -7  777.22   22.80
   0  -2   7  756.82   22.40
   0  -2   7  766.22   23.30
   0  -2  -7  748.03   20.20
   0  -2   7  745.83   23.00
   0  -2  -7  758.82   23.60
   0  -2  -7  784.42   23.40
   0   2  -7  739.53   24.60
   0   2  -7  777.72   23.80
   0   2   7  796.22   26.10
  -2  -2  -7  154.18    8.40
  -2  -2  -7  175.88   10.70
   2  -2   7  170.08   10.60
   2  -2   7  174.08   10.80
   2  -2   7  142.39    8.80
  -2  -2  -7  170.68   11.00
  -2   2  -7  159.58   12.00
   2   2   7  162.28   12.50
   2   2   7  192.48   11.50
  -2   2  -7  162.88    7.30
   4  -2   7   50.79    7.40
  -4  -2  -7   60.39    7.60
  -4  -2  -7   62.69    8.00
   4  -2   7   72.19    6.50
  -4  -2  -7   58.89    6.60
   4   2   7   68.39    9.80
  -4   2  -7   57.49    5.60
  -4   2  -7   79.09    9.40
  -4   2  -7   72.89    9.00
   4   2   7   78.89    8.60
  -6  -2  -7   75.69    8.40
   6  -2   7   81.29    7.20
   6  -2   7   82.49    9.20
  -6  -2  -7   81.59    9.40
   6   2   7   75.89   11.50
   6   2   7   55.09    8.40
  -6   2  -7   69.29    9.40
  -6   2  -7   82.39    7.60
  -6   2  -7   58.39    9.20
  -8  -2  -7  177.08   13.60
   8  -2   7  188.58   13.60
   8  -2   7  146.49   10.20
  -8  -2  -7  162.48   12.40
   8   2   7  176.38   17.10
  -8   2  -7  189.88   14.80
  -8   2  -7  192.48   15.00
   8   2   7  181.88   13.60
 -10  -2  -7  217.88   16.30
 -10  -2  -7  211.28   15.30
  10  -2   7  183.28   14.30
 -10   2  -7  226.08   17.80
  10   2   7  198.18   19.30
  10   2   7  207.78   15.50
 -10   2  -7  203.68   16.00
 -12  -2  -7  213.08   16.80
 -12  -2  -7  257.97   19.10
  12  -2   7  254.47   18.60
  12   2   7  243.78   17.70
  12   2   7  251.47   23.40
 -12   2  -7  205.48   19.00
 -12   2  -7  279.07   19.10
 -14  -2  -7  239.08   19.30
 -14  -2  -7  241.38   18.70
  14  -2   7  206.18   17.60
 -14   2  -7  216.38   20.20
  14   2   7  267.97   25.90
 -14   2  -7  224.88   18.60
  14   2   7  273.57   19.60
 -16  -2  -7  256.07   19.60
 -16  -2  -7  281.27   22.10
  16  -2   7  233.88   19.50
  16   2   7  228.18   32.90
 -16   2  -7  253.37   23.50
 -16   2  -7  231.98   20.00
  16   2   7  256.57   20.00
  18  -2   7    1.80   12.70
 -18  -2  -7    5.30   12.40
 -18  -2  -7  -10.20   14.00
 -18   2  -7   21.70   13.20
 -18   2  -7   11.30   15.90
  18   2   7    3.30   12.20
  20  -2   7   24.90   14.60
 -20  -2  -7   -0.40   16.00
 -20   2  -7   -5.30   17.50
  20   2   7   28.50   15.00
 -20   2  -7   10.10   14.00
 -27  -3   7   34.60   19.00
 -27   3   7  -13.60   16.00
  27   3  -7  -12.30   21.70
 -25  -3   7   24.50   17.00
  25   3  -7   -8.40   16.40
  25   3  -7    8.60   19.70
 -25   3   7   34.00   15.80
 -23  -3   7   16.00   14.10
 -23   3   7  -16.30   12.00
  23   3  -7  -10.50   14.10
  23   3  -7    5.90   16.20
  21  -3  -7   13.50   11.50
 -21  -3   7   29.00   12.90
  21  -3  -7   23.40   13.50
  21   3  -7   11.20   15.20
 -21   3   7   22.00   11.10
 -21   3   7   17.90   11.60
  21   3  -7   15.40   13.20
 -19  -3   7   24.70   11.30
  19  -3  -7   19.20   12.20
  19  -3  -7   30.30   11.40
  19   3  -7   22.50   12.20
  19   3  -7   52.49   15.00
 -19   3   7   41.80   11.00
 -19   3   7   39.90   10.50
  17  -3  -7   -1.30    9.20
 -17  -3   7    2.80    9.00
  17  -3  -7    5.10    8.60
  17  -3  -7   18.00    7.30
 -17   3   7   -6.40    7.60
  17   3  -7    4.80   11.30
 -17   3   7    7.50    7.50
  17   3  -7    8.80    9.60
 -15  -3   7   83.69   11.40
  15  -3  -7   72.79    9.40
  15  -3  -7   89.49   10.80
  15  -3  -7   87.89   11.30
  15   3  -7   90.29   13.00
 -15   3   7   85.09   10.60
  15   3  -7   87.69   10.70
 -15   3   7   80.89    9.70
  13  -3  -7  174.38   13.40
 -13  -3   7  144.89   12.70
  13  -3  -7  166.38   12.60
  13  -3  -7  184.38   14.10
 -13   3   7  160.18   11.10
  13   3  -7  152.38   11.70
  13   3  -7  164.48   14.90
 -13   3   7  171.68   13.00
  11  -3  -7  579.54   21.20
  11  -3  -7  599.34   22.80
 -11  -3   7  597.84   23.60
 -11  -3   7  576.54   22.90
  11  -3  -7  597.04   22.40
  11   3  -7  578.84   20.00
 -11   3   7  568.84   18.60
 -11   3   7  582.94   21.90
  11   3  -7  626.24   23.90
  -9  -3   7  107.39   10.30
   9  -3  -7  110.39   10.20
  -9  -3   7   87.69    5.30
   9  -3  -7   88.69   10.00
  -9  -3   7   74.59    9.30
   9   3  -7   93.19    9.90
  -9   3   7   87.99    6.50
   9   3  -7   78.79    7.10
  -9   3   7   84.99    9.00
   9   3  -7   80.69    5.50
  -7  -3   7   55.49    4.80
   7  -3  -7   58.49    7.80
  -7  -3   7   43.40    7.40
  -7  -3   7   59.59    7.50
   7  -3  -7   56.59    8.10
   7   3  -7   57.89    7.70
  -7   3   7   47.70    7.50
   7   3  -7   63.49    5.30
  -5  -3   7   -2.50    3.20
   5  -3  -7    2.60    4.70
  -5  -3   7    6.70    5.30
  -5  -3   7   11.80    5.00
   5  -3  -7    5.00    5.30
  -5   3   7    6.10    5.40
   5   3  -7    4.50    4.80
  -5   3   7    0.90    3.50
  -3  -3   7  133.99    8.10
   3  -3  -7  128.29    9.70
  -3  -3   7  125.49    8.80
  -3  -3   7  124.19    9.70
   3   3  -7  116.19    8.50
  -3   3   7  150.98   12.50
  -3   3   7  122.89   10.70
   3   3  -7  117.19   10.90
   1  -3  -7   46.20    7.00
  -1  -3   7   49.70    6.00
  -1  -3   7   34.40    6.20
   1  -3  -7   49.10    6.50
  -1  -3   7   46.90    5.70
  -1   3   7   41.80    7.90
   1   3  -7   52.39    8.10
   1   3  -7   51.49    5.70
  -1   3   7   48.20    9.20
  -1  -3  -7   63.39    5.10
   1  -3   7   60.39    7.10
  -1  -3  -7   63.39    7.90
  -1  -3  -7   48.20    7.00
   1  -3   7   69.29    6.40
   1  -3   7   57.09    7.30
  -1   3  -7   72.09    9.10
  -1   3  -7   61.19    5.90
   1   3   7   45.50    6.90
   1   3   7   60.69    9.60
   3  -3   7  243.88   13.50
  -3  -3  -7  237.48   13.50
  -3  -3  -7  232.68   10.80
  -3  -3  -7  225.58   13.60
   3  -3   7  227.18   13.00
   3  -3   7  237.58   10.20
  -3   3  -7  241.58   15.10
   3   3   7  275.07   16.90
  -3   3  -7  244.78    9.80
  -5  -3  -7    8.20    5.20
   5  -3   7    8.60    6.10
   5  -3   7    7.40    4.10
  -5  -3  -7   -0.10    6.30
  -5   3  -7    6.80    4.30
   5   3   7   30.20    9.90
  -5   3  -7   -0.50    6.80
   7  -3   7   44.30    8.70
  -7  -3  -7   55.69    8.10
  -7  -3  -7   67.59    9.70
  -7   3  -7   44.00    9.90
   7   3   7   43.10   11.80
   7   3   7   69.19   10.00
   9  -3   7  163.58   13.50
  -9  -3  -7  156.48   12.70
  -9  -3  -7  153.08   13.70
   9   3   7  145.89   13.60
  -9   3  -7  117.39   14.10
   9   3   7  143.69   18.00
 -11  -3  -7  161.08   14.70
  11  -3   7  167.08   14.90
 -11  -3  -7  162.68   14.60
  11   3   7  194.78   22.20
  11   3   7  168.88   15.10
 -11   3  -7  174.78   17.70
  13  -3   7  234.18   18.60
 -13  -3  -7  259.27   19.10
 -13  -3  -7  280.27   20.40
 -13   3  -7  297.77   21.20
 -13   3  -7  299.37   23.40
  13   3   7  287.87   28.40
  13   3   7  272.47   19.60
 -15  -3  -7   72.99   13.40
  15  -3   7   45.20   12.60
 -15  -3  -7   95.39   15.70
 -15   3  -7   68.79   13.90
  15   3   7   59.89   13.80
  15   3   7  103.99   21.40
 -15   3  -7   64.59   16.70
 -17  -3  -7   29.50   14.30
  17  -3   7    1.40   12.30
 -17  -3  -7   22.30   12.90
  17   3   7  -22.50   16.00
 -17   3  -7  -17.90   14.60
 -17   3  -7    7.50   12.20
  17   3   7   20.70   13.00
  19  -3   7   -2.10   13.10
 -19  -3  -7  -22.50   14.90
 -19  -3  -7  -16.30   14.40
 -19   3  -7   -7.60   17.50
  19   3   7  -16.70   12.70
 -19   3  -7    2.20   13.70
  21  -3   7   13.20   14.80
 -21  -3  -7  -10.70   17.50
 -21   3  -7  -23.30   19.10
 -21   3  -7    5.90   14.40
 -28  -4   7    1.40   20.50
  28   4  -7   21.50   26.20
 -28   4   7   22.90   18.60
 -26  -4   7  188.98   24.70
 -26   4   7  148.89   21.60
  26   4  -7  146.39   30.30
  26   4  -7  161.58   25.10
 -24  -4   7   48.10   17.20
 -24   4   7   41.60   16.10
  24   4  -7    9.30   19.80
  24   4  -7   46.30   18.40
 -22  -4   7  114.29   18.50
  22   4  -7  108.09   18.50
  22   4  -7  127.69   22.30
 -22   4   7  111.59   16.70
 -20  -4   7   20.80   12.90
  20  -4  -7   24.90   14.20
  20  -4  -7   30.50   11.80
  20   4  -7   50.69   14.00
  20   4  -7   27.20   15.60
 -20   4   7   35.70   12.20
 -20   4   7   36.40   10.80
  18  -4  -7   89.69   11.30
  18  -4  -7   65.59   12.90
 -18  -4   7   75.49   13.30
  18  -4  -7   83.89   12.70
 -18   4   7   80.19   11.80
 -18   4   7   58.99   11.60
  18   4  -7   68.59   16.60
  18   4  -7   43.00   12.80
  16  -4  -7   14.70    9.60
  16  -4  -7    0.50    8.10
  16  -4  -7    6.30    8.00
 -16  -4   7    6.60    9.20
 -16   4   7    6.30    7.20
  16   4  -7   10.20   11.30
 -16   4   7   18.20    8.30
  16   4  -7   19.30   10.00
  14  -4  -7   10.00    8.10
  14  -4  -7   16.30    8.90
 -14  -4   7   31.20    9.30
  14  -4  -7   29.80    8.70
  14   4  -7   29.30    9.00
 -14   4   7   33.00    7.80
 -14   4   7   26.40    7.50
  14   4  -7   32.90   11.00
 -12  -4   7   49.00    9.50
  12  -4  -7   56.89    9.70
  12  -4  -7   52.49    9.60
  12   4  -7   47.10    8.10
  12   4  -7   71.99   11.40
 -12   4   7   54.69    8.90
 -12   4   7   51.99    7.10
  10  -4  -7  780.92   27.90
[truncated: 399,524 more chars]
