# Supplementary material
Source: publisher figshare collection journal article supplement (https://acs.figshare.com/ndownloader/files/22494656)
Supplement: Supplementary file 1 [file 22494656 › CIF/1S.cif]

data_1s
_audit_creation_date               2019-04-01
_audit_creation_method
;
Olex2 1.2
(compiled 2018.05.29 svn.r3508 for OlexSys, GUI svn.r5506)
;
_shelx_SHELXL_version_number       '2016/6'
_audit_contact_author_address      ?
_audit_contact_author_email        ?
_audit_contact_author_name         ''
_audit_contact_author_phone        ?
_publ_contact_author_id_orcid      ?
_publ_section_references
;
Bourhis, L.J., Dolomanov, O.V., Gildea, R.J., Howard, J.A.K., Puschmann, H.
 (2015). Acta Cryst. A71, 59-75.

Dolomanov, O.V., Bourhis, L.J., Gildea, R.J, Howard, J.A.K. & Puschmann, H.
 (2009), J. Appl. Cryst. 42, 339-341.

Sheldrick, G.M. (2008). Acta Cryst. A64, 112-122.
;
_chemical_name_common              ?
_chemical_name_systematic          ?
_chemical_formula_moiety           'C22 H17 Cu I N3 O, C H3 O, C H2 O'
_chemical_formula_sum              'C24 H22 Cu I N3 O3'
_chemical_formula_weight           590.88
_chemical_melting_point            ?
loop_
  _atom_type_symbol
  _atom_type_description
  _atom_type_scat_dispersion_real
  _atom_type_scat_dispersion_imag
  _atom_type_scat_source
 'C' 'C' 0.0033 0.0016 'International Tables Vol C Tables 4.2.6.8 and 6.1.1.4'
 'H' 'H' 0.0000 0.0000 'International Tables Vol C Tables 4.2.6.8 and 6.1.1.4'
 'Cu' 'Cu' 0.3201 1.2651 'International Tables Vol C Tables 4.2.6.8 and 6.1.1.4'
 'I' 'I' -0.4742 1.8119 'International Tables Vol C Tables 4.2.6.8 and 6.1.1.4'
 'N' 'N' 0.0061 0.0033 'International Tables Vol C Tables 4.2.6.8 and 6.1.1.4'
 'O' 'O' 0.0106 0.0060 'International Tables Vol C Tables 4.2.6.8 and 6.1.1.4'

_shelx_space_group_comment
;
The symmetry employed for this shelxl refinement is uniquely defined
by the following loop, which should always be used as a source of
symmetry information in preference to the above space-group names.
They are only intended as comments.
;
_space_group_crystal_system        'monoclinic'
_space_group_IT_number             15
_space_group_name_H-M_alt          'I 1 2/c 1'
_space_group_name_Hall             '-I 2yc'
loop_
  _space_group_symop_operation_xyz
 'x, y, z'
 '-x, y, -z+1/2'
 'x+1/2, y+1/2, z+1/2'
 '-x+1/2, y+1/2, -z+1'
 '-x, -y, -z'
 'x, -y, z-1/2'
 '-x+1/2, -y+1/2, -z+1/2'
 'x+1/2, -y+1/2, z'

_cell_length_a                     18.180(2)
_cell_length_b                     11.8500(10)
_cell_length_c                     24.082(3)
_cell_angle_alpha                  90
_cell_angle_beta                   109.299(8)
_cell_angle_gamma                  90
_cell_volume                       4896.5(9)
_cell_formula_units_Z              8
_cell_measurement_reflns_used      9872
_cell_measurement_temperature      100(2)
_cell_measurement_theta_max        25.48
_cell_measurement_theta_min        2.37
_shelx_estimated_absorpt_T_max     0.634
_shelx_estimated_absorpt_T_min     0.611
_exptl_absorpt_coefficient_mu      2.182
_exptl_absorpt_correction_T_max    0.7452
_exptl_absorpt_correction_T_min    0.5198
_exptl_absorpt_correction_type     multi-scan
_exptl_absorpt_process_details    
 'SADABS-2014/4 (Bruker,2014/4) was used for absorption correction. wR2(int) was 0.1645 before and 0.0697 after correction. The Ratio of minimum to maximum transmission is 0.6975. The \l/2 correction factor is 0.00150.'
_exptl_absorpt_special_details     ?
_exptl_crystal_colour              'dull light yellow'
_exptl_crystal_colour_lustre       dull
_exptl_crystal_colour_modifier     light
_exptl_crystal_colour_primary      yellow
_exptl_crystal_density_diffrn      1.603
_exptl_crystal_density_meas        ?
_exptl_crystal_density_method      ?
_exptl_crystal_description         plate
_exptl_crystal_F_000               2344
_exptl_crystal_size_max            0.25
_exptl_crystal_size_mid            0.24
_exptl_crystal_size_min            0.23
_exptl_transmission_factor_max     ?
_exptl_transmission_factor_min     ?
_diffrn_reflns_av_R_equivalents    0.1277
_diffrn_reflns_av_unetI/netI       0.0583
_diffrn_reflns_Laue_measured_fraction_full  0.999
_diffrn_reflns_Laue_measured_fraction_max  0.975
_diffrn_reflns_limit_h_max         21
_diffrn_reflns_limit_h_min         -21
_diffrn_reflns_limit_k_max         14
_diffrn_reflns_limit_k_min         -14
_diffrn_reflns_limit_l_max         29
_diffrn_reflns_limit_l_min         -27
_diffrn_reflns_number              40513
_diffrn_reflns_point_group_measured_fraction_full  0.999
_diffrn_reflns_point_group_measured_fraction_max  0.975
_diffrn_reflns_theta_full          25.242
_diffrn_reflns_theta_max           25.742
_diffrn_reflns_theta_min           1.938
_diffrn_ambient_temperature        100
_diffrn_detector_area_resol_mean   ?
_diffrn_measured_fraction_theta_full  0.999
_diffrn_measured_fraction_theta_max  0.975
_diffrn_measurement_device_type    'Bruker CCD'
_diffrn_measurement_method         '\f and \w scans'
_diffrn_radiation_type             MoK\a
_diffrn_radiation_wavelength       0.71073
_diffrn_source                     ?
_diffrn_special_details           
 'the structure were solved  in P-1 but PLATON suggests a I2/c nonstandard space group so cell were changed by ADDSYM and res file were generated and further refined.'
_reflns_Friedel_coverage           0.000
_reflns_Friedel_fraction_full      .
_reflns_Friedel_fraction_max       .
_reflns_number_gt                  3884
_reflns_number_total               4584
_reflns_special_details
;
 Reflections were merged by SHELXL according to the crystal
 class for the calculation of statistics and refinement.
 
 _reflns_Friedel_fraction is defined as the number of unique
 Friedel pairs measured divided by the number that would be
 possible theoretically, ignoring centric projections and
 systematic absences.
;
_reflns_threshold_expression       'I > 2\s(I)'
_computing_cell_refinement         'SAINT v8.34A (Bruker, 2013)'
_computing_data_collection         ?
_computing_data_reduction          'SAINT v8.34A (Bruker, 2013)'
_computing_molecular_graphics      'Olex2 (Dolomanov et al., 2009)'
_computing_publication_material    'Olex2 (Dolomanov et al., 2009)'
_computing_structure_refinement    'XL (Sheldrick, 2008)'
_computing_structure_solution      'olex2.solve (Bourhis et al., 2015)'
_refine_diff_density_max           2.512
_refine_diff_density_min           -3.788
_refine_diff_density_rms           0.275
_refine_ls_extinction_coef         .
_refine_ls_extinction_method       none
_refine_ls_goodness_of_fit_ref     1.168
_refine_ls_hydrogen_treatment      constr
_refine_ls_matrix_type             full
_refine_ls_number_parameters       266
_refine_ls_number_reflns           4584
_refine_ls_number_restraints       1
_refine_ls_R_factor_all            0.1494
_refine_ls_R_factor_gt             0.1348
_refine_ls_restrained_S_all        1.168
_refine_ls_shift/su_max            0.001
_refine_ls_shift/su_mean           0.000
_refine_ls_structure_factor_coef   Fsqd
_refine_ls_weighting_details      
 'w=1/[\s^2^(Fo^2^)+(0.0001P)^2^+653.3145P] where P=(Fo^2^+2Fc^2^)/3'
_refine_ls_weighting_scheme        calc
_refine_ls_wR_factor_gt            0.2927
_refine_ls_wR_factor_ref           0.3017
_refine_special_details            ?
_olex2_refinement_description
;
1. Fixed Uiso
 At 1.2 times of:
  All C(H) groups, All C(H,H) groups
 At 1.5 times of:
  All C(H,H,H) groups, All O(H) groups
2. Restrained distances
 C0AA-C0AA_$1
 1.5 with sigma of 0.02
3. Uiso/Uaniso restraints and constraints
Uanis(C22) = Uanis(C10)
Uanis(O1) = Uanis(C12)
Uanis(C7) = Uanis(C20)
Uanis(C3AA) = Uanis(C19)
4.a Riding coordinates:
 O3(H3)
4.b Secondary CH2 refined with riding coordinates:
 C3AA(H3AA,H3AB), C0AA(H0AA,H0AB)
4.c Aromatic/amide H refined with riding coordinates:
 C10(H10), C1(H1), C8(H8), C2(H2), C5(H5), C18(H18), C4(H4), C21(H21),
 C17(H17), C20(H20), C12(H12), C16(H16), C15(H15), C13(H13)
4.d Idealised Me refined as rotating group:
 C22(H22A,H22B,H22C)
;
_atom_sites_solution_hydrogens     mixed
_atom_sites_solution_primary       iterative
_atom_sites_solution_secondary     ?
loop_
  _atom_site_label
  _atom_site_type_symbol
  _atom_site_fract_x
  _atom_site_fract_y
  _atom_site_fract_z
  _atom_site_U_iso_or_equiv
  _atom_site_adp_type
  _atom_site_occupancy
  _atom_site_site_symmetry_order
  _atom_site_calc_flag
  _atom_site_refinement_flags_posn
  _atom_site_refinement_flags_adp
  _atom_site_refinement_flags_occupancy
  _atom_site_disorder_assembly
  _atom_site_disorder_group
 I001 I 0.17501(6) 0.58959(9) 0.71124(6) 0.0390(4) Uani 1 1 d . . . . .
 Cu03 Cu 0.31144(11) 0.69777(17) 0.74886(9) 0.0289(5) Uani 1 1 d . . . . .
 O1 O 0.7358(8) -0.1498(14) 0.9715(10) 0.082(6) Uani 1 1 d . . . . .
 N3 N 0.4325(8) 0.3647(12) 1.0031(7) 0.035(3) Uani 1 1 d . . . . .
 N2 N 0.3677(8) 0.6031(12) 0.8204(7) 0.036(3) Uani 1 1 d . . . . .
 N1 N 0.3579(8) 0.6944(12) 0.6854(7) 0.034(3) Uani 1 1 d . . . . .
 C19 C 0.4251(12) 0.295(2) 1.0936(11) 0.056(4) Uani 1 1 d . . . . .
 C10 C 0.5066(12) 0.270(2) 0.9506(14) 0.074(6) Uani 1 1 d . . . . .
 H10 H 0.523744 0.268605 0.917334 0.089 Uiso 1 1 calc R . . . .
 C1 C 0.3479(10) 0.6041(16) 0.8672(8) 0.038(4) Uani 1 1 d . . . . .
 H1 H 0.313104 0.661275 0.870657 0.046 Uiso 1 1 calc R . . . .
 C8 C 0.5034(9) 0.1968(14) 1.0427(9) 0.033(4) Uani 1 1 d . . . . .
 H8 H 0.517996 0.142629 1.073481 0.039 Uiso 1 1 calc R . . . .
 C9 C 0.5298(9) 0.1857(14) 0.9948(8) 0.029(4) Uani 1 1 d . . . . .
 C11 C 0.5808(10) 0.0948(14) 0.9871(10) 0.042(5) Uani 1 1 d . . . . .
 C7 C 0.4559(10) 0.2870(18) 1.0456(8) 0.040(3) Uani 1 1 d . . . . .
 C2 C 0.3747(10) 0.5260(16) 0.9131(9) 0.041(4) Uani 1 1 d . . . . .
 H2 H 0.356246 0.528703 0.945708 0.049 Uiso 1 1 calc R . . . .
 C5 C 0.4219(11) 0.5279(16) 0.8166(9) 0.043(5) Uani 1 1 d . . . . .
 H5 H 0.439797 0.530175 0.783743 0.052 Uiso 1 1 calc R . . . .
 C18 C 0.3660(11) 0.3719(15) 1.0926(9) 0.038(4) Uani 1 1 d . . . . .
 H18 H 0.347391 0.423122 1.060620 0.046 Uiso 1 1 calc R . . . .
 C3 C 0.4290(9) 0.4436(14) 0.9105(8) 0.031(4) Uani 1 1 d . . . . .
 C6 C 0.4573(9) 0.3568(14) 0.9579(8) 0.029(4) Uani 1 1 d . . . . .
 C4 C 0.4517(11) 0.4475(16) 0.8603(10) 0.047(5) Uani 1 1 d . . . . .
 H4 H 0.488392 0.393957 0.856046 0.057 Uiso 1 1 calc R . . . .
 C21 C 0.4174(11) 0.234(2) 1.1858(9) 0.051(5) Uani 1 1 d . . . . .
 H21 H 0.435970 0.183928 1.218188 0.061 Uiso 1 1 calc R . . . .
 C17 C 0.3349(12) 0.3741(15) 1.1373(9) 0.041(4) Uani 1 1 d . . . . .
 H17 H 0.294608 0.426950 1.134514 0.049 Uiso 1 1 calc R . . . .
 C20 C 0.4515(10) 0.2296(18) 1.1444(8) 0.040(3) Uani 1 1 d . . . . .
 H20 H 0.494635 0.180601 1.149756 0.048 Uiso 1 1 calc R . . . .
 C12 C 0.6232(12) 0.034(2) 1.0346(16) 0.082(6) Uani 1 1 d . . . . .
 H12 H 0.617383 0.048742 1.071662 0.099 Uiso 1 1 calc R . . . .
 C14 C 0.6855(13) -0.0705(19) 0.9813(16) 0.076(10) Uani 1 1 d . . . . .
 C16 C 0.5933(17) 0.0715(17) 0.9362(13) 0.072(8) Uani 1 1 d . . . . .
 H16 H 0.564455 0.112131 0.901919 0.087 Uiso 1 1 calc R . . . .
 C15 C 0.6463(18) -0.0093(19) 0.9314(17) 0.086(11) Uani 1 1 d . . . . .
 H15 H 0.655180 -0.022041 0.895223 0.103 Uiso 1 1 calc R . . . .
 C13 C 0.6755(12) -0.051(2) 1.0308(13) 0.077(9) Uani 1 1 d . . . . .
 H13 H 0.703159 -0.093863 1.064639 0.093 Uiso 1 1 calc R . . . .
 C22 C 0.7725(12) -0.226(2) 1.0198(13) 0.074(6) Uani 1 1 d . . . . .
 H22A H 0.813525 -0.269139 1.011090 0.111 Uiso 1 1 calc GR . . . .
 H22B H 0.733368 -0.278655 1.024741 0.111 Uiso 1 1 calc GR . . . .
 H22C H 0.795321 -0.182981 1.056050 0.111 Uiso 1 1 calc GR . . . .
 O3 O 0.5636(17) 0.277(3) 0.8063(15) 0.182(16) Uani 1 1 d . . . . .
 H3 H 0.611359 0.286329 0.817157 0.274 Uiso 1 1 d R . . . .
 C3AA C 0.5435(11) 0.189(2) 0.7697(11) 0.056(4) Uani 1 1 d . . . . .
 H3AA H 0.554486 0.118365 0.793136 0.067 Uiso 1 1 calc R . . . .
 H3AB H 0.576348 0.188664 0.744126 0.067 Uiso 1 1 calc R . . . .
 O2 O 0.2107(11) 0.1580(17) 0.7961(12) 0.104(8) Uani 1 1 d . . . . .
 C0AA C 0.255(2) 0.247(3) 0.7825(6) 0.115(14) Uani 1 1 d D . . . .
 H0AA H 0.310943 0.235035 0.805041 0.138 Uiso 1 1 calc R . . . .
 H0AB H 0.239153 0.319604 0.795187 0.138 Uiso 1 1 calc R . . . .

loop_
  _atom_site_aniso_label
  _atom_site_aniso_U_11
  _atom_site_aniso_U_22
  _atom_site_aniso_U_33
  _atom_site_aniso_U_23
  _atom_site_aniso_U_13
  _atom_site_aniso_U_12
 I001 0.0290(6) 0.0225(5) 0.0601(8) 0.0046(5) 0.0073(5) -0.0029(4)
 Cu03 0.0283(10) 0.0262(10) 0.0351(11) 0.0078(9) 0.0142(9) 0.0037(8)
 O1 0.037(7) 0.054(8) 0.163(17) -0.065(10) 0.043(9) -0.007(6)
 N3 0.027(7) 0.036(8) 0.050(10) -0.005(7) 0.024(7) -0.005(6)
 N2 0.030(7) 0.025(7) 0.053(10) 0.004(7) 0.014(7) 0.004(6)
 N1 0.030(7) 0.032(8) 0.037(8) 0.007(7) 0.008(6) 0.006(6)
 C19 0.043(8) 0.065(10) 0.071(11) -0.014(9) 0.036(8) -0.005(7)
 C10 0.034(8) 0.057(11) 0.123(17) -0.042(11) 0.016(9) 0.006(7)
 C1 0.031(9) 0.043(10) 0.042(10) -0.001(9) 0.015(8) 0.016(8)
 C8 0.031(8) 0.024(8) 0.050(11) -0.004(8) 0.024(8) -0.010(7)
 C9 0.029(8) 0.025(8) 0.043(10) -0.009(7) 0.025(8) -0.008(7)
 C11 0.034(9) 0.018(8) 0.085(15) -0.023(9) 0.036(10) -0.005(7)
 C7 0.028(6) 0.057(9) 0.033(7) 0.001(6) 0.010(5) 0.010(6)
 C2 0.031(9) 0.040(10) 0.052(12) 0.015(9) 0.016(8) 0.011(8)
 C5 0.042(10) 0.039(10) 0.056(13) 0.011(9) 0.026(9) 0.007(8)
 C18 0.052(11) 0.027(9) 0.045(11) -0.002(8) 0.027(9) 0.006(8)
 C3 0.022(8) 0.032(9) 0.044(10) 0.000(7) 0.016(7) -0.003(6)
 C6 0.028(8) 0.028(8) 0.037(10) 0.002(7) 0.019(7) -0.006(7)
 C4 0.044(11) 0.031(10) 0.074(15) 0.011(10) 0.030(10) 0.005(8)
 C21 0.032(10) 0.078(15) 0.039(11) 0.012(11) 0.008(8) 0.018(10)
 C17 0.054(11) 0.031(9) 0.043(11) 0.002(8) 0.024(9) 0.010(8)
 C20 0.028(6) 0.057(9) 0.033(7) 0.001(6) 0.010(5) 0.010(6)
 C12 0.037(7) 0.054(8) 0.163(17) -0.065(10) 0.043(9) -0.007(6)
 C14 0.040(12) 0.031(11) 0.18(3) -0.041(16) 0.062(16) -0.022(10)
 C16 0.12(2) 0.025(10) 0.11(2) 0.001(12) 0.086(19) 0.007(12)
 C15 0.12(2) 0.029(11) 0.17(3) -0.016(16) 0.12(2) -0.015(14)
 C13 0.031(10) 0.088(19) 0.095(19) -0.077(17) -0.002(11) 0.002(11)
 C22 0.034(8) 0.057(11) 0.123(17) -0.042(11) 0.016(9) 0.006(7)
 O3 0.14(2) 0.21(3) 0.19(3) -0.14(3) 0.05(2) 0.05(2)
 C3AA 0.043(8) 0.065(10) 0.071(11) -0.014(9) 0.036(8) -0.005(7)
 O2 0.080(13) 0.079(13) 0.20(3) 0.003(15) 0.110(16) -0.002(11)
 C0AA 0.10(2) 0.08(2) 0.17(4) 0.03(3) 0.04(3) -0.006(18)

_geom_special_details
;
 All esds (except the esd in the dihedral angle between two l.s. planes)
 are estimated using the full covariance matrix.  The cell esds are taken
 into account individually in the estimation of esds in distances, angles
 and torsion angles; correlations between esds in cell parameters are only
 used when they are defined by crystal symmetry.  An approximate (isotropic)
 treatment of cell esds is used for estimating esds involving l.s. planes.
;
loop_
  _geom_bond_atom_site_label_1
  _geom_bond_atom_site_label_2
  _geom_bond_distance
  _geom_bond_site_symmetry_2
  _geom_bond_publ_flag
 I001 Cu03 2.670(2) . ?
 I001 Cu03 2.679(2) 7_566 ?
 Cu03 Cu03 2.571(4) 7_566 ?
 Cu03 N2 2.027(15) . ?
 Cu03 N1 1.976(16) . ?
 O1 C14 1.38(2) . ?
 O1 C22 1.45(3) . ?
 N3 C7 1.34(2) . ?
 N3 C6 1.31(2) . ?
 N2 C1 1.29(2) . ?
 N2 C5 1.35(2) . ?
 N1 C21 1.37(2) 6_565 ?
 N1 C17 1.36(2) 6_565 ?
 C19 C7 1.44(3) . ?
 C19 C18 1.41(3) . ?
 C19 C20 1.39(3) . ?
 C10 H10 0.9500 . ?
 C10 C9 1.42(3) . ?
 C10 C6 1.41(3) . ?
 C1 H1 0.9500 . ?
 C1 C2 1.40(3) . ?
 C8 H8 0.9500 . ?
 C8 C9 1.40(2) . ?
 C8 C7 1.39(2) . ?
 C9 C11 1.47(2) . ?
 C11 C12 1.36(4) . ?
 C11 C16 1.35(3) . ?
 C2 H2 0.9500 . ?
 C2 C3 1.41(2) . ?
 C5 H5 0.9500 . ?
 C5 C4 1.39(3) . ?
 C18 H18 0.9500 . ?
 C18 C17 1.37(3) . ?
 C3 C6 1.49(2) . ?
 C3 C4 1.40(3) . ?
 C4 H4 0.9500 . ?
 C21 H21 0.9500 . ?
 C21 C20 1.34(3) . ?
 C17 H17 0.9500 . ?
 C20 H20 0.9500 . ?
 C12 H12 0.9500 . ?
 C12 C13 1.41(3) . ?
 C14 C15 1.38(4) . ?
 C14 C13 1.29(4) . ?
 C16 H16 0.9500 . ?
 C16 C15 1.39(3) . ?
 C15 H15 0.9500 . ?
 C13 H13 0.9500 . ?
 C22 H22A 0.9800 . ?
 C22 H22B 0.9800 . ?
 C22 H22C 0.9800 . ?
 O3 H3 0.8282 . ?
 O3 C3AA 1.34(3) . ?
 C3AA C3AA 1.55(4) 2_656 ?
 C3AA H3AA 0.9900 . ?
 C3AA H3AB 0.9900 . ?
 O2 C0AA 1.43(4) . ?
 C0AA C0AA 1.52(2) 7_556 ?
 C0AA H0AA 0.9900 . ?
 C0AA H0AB 0.9900 . ?

loop_
  _geom_angle_atom_site_label_1
  _geom_angle_atom_site_label_2
  _geom_angle_atom_site_label_3
  _geom_angle
  _geom_angle_site_symmetry_1
  _geom_angle_site_symmetry_3
  _geom_angle_publ_flag
 Cu03 I001 Cu03 57.44(8) . 7_566 ?
 I001 Cu03 I001 122.56(8) . 7_566 ?
 Cu03 Cu03 I001 61.11(8) 7_566 7_566 ?
 Cu03 Cu03 I001 61.45(8) 7_566 . ?
 N2 Cu03 I001 104.8(4) . 7_566 ?
 N2 Cu03 I001 100.0(4) . . ?
 N2 Cu03 Cu03 116.5(4) . 7_566 ?
 N1 Cu03 I001 108.3(4) . . ?
 N1 Cu03 I001 106.5(4) . 7_566 ?
 N1 Cu03 Cu03 128.5(4) . 7_566 ?
 N1 Cu03 N2 114.9(6) . . ?
 C14 O1 C22 116(2) . . ?
 C6 N3 C7 118.3(15) . . ?
 C1 N2 Cu03 121.9(12) . . ?
 C1 N2 C5 118.9(16) . . ?
 C5 N2 Cu03 118.8(13) . . ?
 C21 N1 Cu03 121.3(13) 6_565 . ?
 C17 N1 Cu03 125.5(12) 6_565 . ?
 C17 N1 C21 113.2(16) 6_565 6_565 ?
 C18 C19 C7 122(2) . . ?
 C20 C19 C7 123.8(19) . . ?
 C20 C19 C18 114.6(19) . . ?
 C9 C10 H10 121.2 . . ?
 C6 C10 H10 121.2 . . ?
 C6 C10 C9 118(2) . . ?
 N2 C1 H1 118.0 . . ?
 N2 C1 C2 124.0(16) . . ?
 C2 C1 H1 118.0 . . ?
 C9 C8 H8 119.9 . . ?
 C7 C8 H8 119.9 . . ?
 C7 C8 C9 120.3(18) . . ?
 C10 C9 C11 117.7(18) . . ?
 C8 C9 C10 117.1(17) . . ?
 C8 C9 C11 125.2(18) . . ?
 C12 C11 C9 119.3(19) . . ?
 C16 C11 C9 125(2) . . ?
 C16 C11 C12 116(2) . . ?
 N3 C7 C19 117.3(18) . . ?
 N3 C7 C8 122.5(17) . . ?
 C8 C7 C19 120.1(19) . . ?
 C1 C2 H2 120.4 . . ?
 C1 C2 C3 119.3(18) . . ?
 C3 C2 H2 120.4 . . ?
 N2 C5 H5 119.7 . . ?
 N2 C5 C4 120.7(19) . . ?
 C4 C5 H5 119.7 . . ?
 C19 C18 H18 119.7 . . ?
 C17 C18 C19 120.6(19) . . ?
 C17 C18 H18 119.7 . . ?
 C2 C3 C6 120.9(16) . . ?
 C4 C3 C2 115.3(17) . . ?
 C4 C3 C6 123.7(15) . . ?
 N3 C6 C10 124(2) . . ?
 N3 C6 C3 117.2(15) . . ?
 C10 C6 C3 118.6(19) . . ?
 C5 C4 C3 121.6(18) . . ?
 C5 C4 H4 119.2 . . ?
 C3 C4 H4 119.2 . . ?
 N1 C21 H21 117.3 6_566 . ?
 C20 C21 N1 125.3(19) . 6_566 ?
 C20 C21 H21 117.3 . . ?
 N1 C17 C18 124.5(17) 6_566 . ?
 N1 C17 H17 117.7 6_566 . ?
 C18 C17 H17 117.7 . . ?
 C19 C20 H20 119.2 . . ?
 C21 C20 C19 121.6(18) . . ?
 C21 C20 H20 119.2 . . ?
 C11 C12 H12 118.9 . . ?
 C11 C12 C13 122(3) . . ?
 C13 C12 H12 118.9 . . ?
 C15 C14 O1 113(3) . . ?
 C13 C14 O1 126(3) . . ?
 C13 C14 C15 121(2) . . ?
 C11 C16 H16 118.4 . . ?
 C11 C16 C15 123(3) . . ?
 C15 C16 H16 118.4 . . ?
 C14 C15 C16 118(3) . . ?
 C14 C15 H15 121.2 . . ?
 C16 C15 H15 121.2 . . ?
 C12 C13 H13 120.2 . . ?
 C14 C13 C12 120(3) . . ?
 C14 C13 H13 120.2 . . ?
 O1 C22 H22A 109.5 . . ?
 O1 C22 H22B 109.5 . . ?
 O1 C22 H22C 109.5 . . ?
 H22A C22 H22B 109.5 . . ?
 H22A C22 H22C 109.5 . . ?
 H22B C22 H22C 109.5 . . ?
 C3AA O3 H3 110.1 . . ?
 O3 C3AA C3AA 113.9(18) . 2_656 ?
 O3 C3AA H3AA 108.8 . . ?
 O3 C3AA H3AB 108.8 . . ?
 C3AA C3AA H3AA 108.8 2_656 . ?
 C3AA C3AA H3AB 108.8 2_656 . ?
 H3AA C3AA H3AB 107.7 . . ?
 O2 C0AA C0AA 113(3) . 7_556 ?
 O2 C0AA H0AA 109.0 . . ?
 O2 C0AA H0AB 109.0 . . ?
 C0AA C0AA H0AA 109.0 7_556 . ?
 C0AA C0AA H0AB 109.0 7_556 . ?
 H0AA C0AA H0AB 107.8 . . ?

loop_
  _geom_torsion_atom_site_label_1
  _geom_torsion_atom_site_label_2
  _geom_torsion_atom_site_label_3
  _geom_torsion_atom_site_label_4
  _geom_torsion
  _geom_torsion_site_symmetry_1
  _geom_torsion_site_symmetry_2
  _geom_torsion_site_symmetry_3
  _geom_torsion_site_symmetry_4
  _geom_torsion_publ_flag
 Cu03 N2 C1 C2 167.7(14) . . . . ?
 Cu03 N2 C5 C4 -168.3(15) . . . . ?
 O1 C14 C15 C16 179(2) . . . . ?
 O1 C14 C13 C12 178.9(19) . . . . ?
 N2 C1 C2 C3 3(3) . . . . ?
 N2 C5 C4 C3 -2(3) . . . . ?
 N1 C21 C20 C19 -4(4) 6_566 . . . ?
 C19 C18 C17 N1 1(3) . . . 6_566 ?
 C10 C9 C11 C12 159.9(19) . . . . ?
 C10 C9 C11 C16 -15(3) . . . . ?
 C1 N2 C5 C4 5(3) . . . . ?
 C1 C2 C3 C6 -178.3(16) . . . . ?
 C1 C2 C3 C4 0(3) . . . . ?
 C8 C9 C11 C12 -19(3) . . . . ?
 C8 C9 C11 C16 166(2) . . . . ?
 C9 C10 C6 N3 1(3) . . . . ?
 C9 C10 C6 C3 -177.0(16) . . . . ?
 C9 C8 C7 N3 1(3) . . . . ?
 C9 C8 C7 C19 176.5(17) . . . . ?
 C9 C11 C12 C13 -177.4(19) . . . . ?
 C9 C11 C16 C15 175(2) . . . . ?
 C11 C12 C13 C14 2(4) . . . . ?
 C11 C16 C15 C14 2(4) . . . . ?
 C7 N3 C6 C10 1(3) . . . . ?
 C7 N3 C6 C3 178.9(15) . . . . ?
 C7 C19 C18 C17 177(2) . . . . ?
 C7 C19 C20 C21 -175(2) . . . . ?
 C7 C8 C9 C10 1(3) . . . . ?
 C7 C8 C9 C11 179.4(16) . . . . ?
 C2 C3 C6 N3 -4(2) . . . . ?
 C2 C3 C6 C10 174.6(17) . . . . ?
 C2 C3 C4 C5 0(3) . . . . ?
 C5 N2 C1 C2 -5(3) . . . . ?
 C18 C19 C7 N3 7(3) . . . . ?
 C18 C19 C7 C8 -168.1(19) . . . . ?
 C18 C19 C20 C21 6(3) . . . . ?
 C6 N3 C7 C19 -177.4(17) . . . . ?
 C6 N3 C7 C8 -2(3) . . . . ?
 C6 C10 C9 C8 -2(3) . . . . ?
 C6 C10 C9 C11 179.6(16) . . . . ?
 C6 C3 C4 C5 178.0(17) . . . . ?
 C4 C3 C6 N3 178.5(17) . . . . ?
 C4 C3 C6 C10 -3(3) . . . . ?
 C20 C19 C7 N3 -171.4(19) . . . . ?
 C20 C19 C7 C8 13(3) . . . . ?
 C20 C19 C18 C17 -4(3) . . . . ?
 C12 C11 C16 C15 0(3) . . . . ?
 C16 C11 C12 C13 -2(3) . . . . ?
 C15 C14 C13 C12 0(3) . . . . ?
 C13 C14 C15 C16 -2(4) . . . . ?
 C22 O1 C14 C15 -173.1(18) . . . . ?
 C22 O1 C14 C13 8(3) . . . . ?

_shelx_res_file
;
TITL ty2_a P -1 R = 0.12 New: I2/c
    1s.res
    created by SHELXL-2016/6 at 20:13:00 on 01-Apr-2019
CELL 0.71073 18.18 11.85 24.082 90 109.299 90
ZERR 8 0.002 0.001 0.003 0 0.008 0
LATT 2
SYMM -X,+Y,0.5-Z
SFAC C H Cu I N O
UNIT 192 176 8 8 24 24
EQIV $1 0.5-X,0.5-Y,1.5-Z
DFIX 1.5 C0AA C0AA_$1
EADP C22 C10
EADP O1 C12
EADP C7 C20
EADP C3AA C19

L.S. 5
PLAN  -20
SIZE 0.25 0.24 0.23
TEMP -153.15
BOND $H
CONF
HTAB
fmap 2
acta
OMIT 0 0 2
OMIT -2 0 4
OMIT 0 0 4
OMIT -3 3 10
OMIT 8 12 8
REM <olex2.extras>
REM <HklSrc "%.\\1s.hkl">
REM </olex2.extras>

WGHT    0.000100  653.314453
FVAR       0.18615
I001  4    0.175009    0.589592    0.711235    11.00000    0.02898    0.02253 =
         0.06006    0.00463    0.00731   -0.00294
CU03  3    0.311444    0.697767    0.748857    11.00000    0.02825    0.02618 =
         0.03512    0.00779    0.01422    0.00370
O1    6    0.735789   -0.149769    0.971481    11.00000    0.03723    0.05402 =
         0.16328   -0.06507    0.04289   -0.00744
N3    5    0.432478    0.364744    1.003109    11.00000    0.02688    0.03609 =
         0.05008   -0.00546    0.02419   -0.00511
N2    5    0.367734    0.603105    0.820404    11.00000    0.02957    0.02527 =
         0.05256    0.00383    0.01431    0.00430
N1    5    0.357891    0.694398    0.685376    11.00000    0.03048    0.03201 =
         0.03727    0.00681    0.00805    0.00592
C19   1    0.425128    0.294710    1.093608    11.00000    0.04267    0.06536 =
         0.07101   -0.01429    0.03555   -0.00509
C10   1    0.506642    0.270255    0.950578    11.00000    0.03438    0.05737 =
         0.12313   -0.04201    0.01648    0.00615
AFIX  43
H10   2    0.523744    0.268605    0.917334    11.00000   -1.20000
AFIX   0
C1    1    0.347938    0.604073    0.867186    11.00000    0.03115    0.04301 =
         0.04167   -0.00106    0.01483    0.01560
AFIX  43
H1    2    0.313104    0.661275    0.870657    11.00000   -1.20000
AFIX   0
C8    1    0.503427    0.196843    1.042703    11.00000    0.03110    0.02428 =
         0.05009   -0.00415    0.02367   -0.00952
AFIX  43
H8    2    0.517996    0.142629    1.073481    11.00000   -1.20000
AFIX   0
C9    1    0.529808    0.185678    0.994759    11.00000    0.02862    0.02502 =
         0.04332   -0.00900    0.02482   -0.00780
C11   1    0.580829    0.094836    0.987055    11.00000    0.03394    0.01838 =
         0.08490   -0.02253    0.03577   -0.00462
C7    1    0.455926    0.286956    1.045605    11.00000    0.02790    0.05747 =
         0.03317    0.00062    0.00971    0.00981
C2    1    0.374658    0.525992    0.913122    11.00000    0.03140    0.04049 =
         0.05174    0.01485    0.01650    0.01145
AFIX  43
H2    2    0.356246    0.528703    0.945708    11.00000   -1.20000
AFIX   0
C5    1    0.421938    0.527941    0.816611    11.00000    0.04205    0.03908 =
         0.05582    0.01104    0.02623    0.00724
AFIX  43
H5    2    0.439797    0.530175    0.783743    11.00000   -1.20000
AFIX   0
C18   1    0.366001    0.371936    1.092577    11.00000    0.05156    0.02674 =
         0.04509   -0.00221    0.02685    0.00567
AFIX  43
H18   2    0.347391    0.423122    1.060620    11.00000   -1.20000
AFIX   0
C3    1    0.429012    0.443553    0.910509    11.00000    0.02204    0.03158 =
         0.04351    0.00017    0.01623   -0.00337
C6    1    0.457340    0.356758    0.957850    11.00000    0.02812    0.02777 =
         0.03684    0.00223    0.01920   -0.00570
C4    1    0.451742    0.447515    0.860308    11.00000    0.04401    0.03143 =
         0.07396    0.01099    0.03000    0.00531
AFIX  43
H4    2    0.488392    0.393957    0.856046    11.00000   -1.20000
AFIX   0
C21   1    0.417388    0.234209    1.185825    11.00000    0.03177    0.07787 =
         0.03943    0.01191    0.00830    0.01763
AFIX  43
H21   2    0.435970    0.183928    1.218188    11.00000   -1.20000
AFIX   0
C17   1    0.334936    0.374055    1.137289    11.00000    0.05429    0.03083 =
         0.04336    0.00216    0.02359    0.00980
AFIX  43
H17   2    0.294608    0.426950    1.134514    11.00000   -1.20000
AFIX   0
C20   1    0.451452    0.229569    1.144364    11.00000    0.02790    0.05747 =
         0.03317    0.00062    0.00971    0.00981
AFIX  43
H20   2    0.494635    0.180601    1.149756    11.00000   -1.20000
AFIX   0
C12   1    0.623232    0.033681    1.034600    11.00000    0.03723    0.05402 =
         0.16328   -0.06507    0.04289   -0.00744
AFIX  43
H12   2    0.617383    0.048742    1.071662    11.00000   -1.20000
AFIX   0
C14   1    0.685512   -0.070455    0.981285    11.00000    0.04028    0.03113 =
         0.17593   -0.04107    0.06211   -0.02201
C16   1    0.593278    0.071456    0.936200    11.00000    0.11857    0.02518 =
         0.10924    0.00146    0.08603    0.00680
AFIX  43
H16   2    0.564455    0.112131    0.901919    11.00000   -1.20000
AFIX   0
C15   1    0.646264   -0.009317    0.931426    11.00000    0.11683    0.02882 =
         0.16872   -0.01575    0.12438   -0.01456
AFIX  43
H15   2    0.655180   -0.022041    0.895223    11.00000   -1.20000
AFIX   0
C13   1    0.675468   -0.051126    1.030811    11.00000    0.03133    0.08829 =
         0.09520   -0.07671   -0.00186    0.00212
AFIX  43
H13   2    0.703159   -0.093863    1.064639    11.00000   -1.20000
AFIX   0
C22   1    0.772482   -0.226359    1.019764    11.00000    0.03438    0.05737 =
         0.12313   -0.04201    0.01648    0.00615
AFIX 137
H22A  2    0.813525   -0.269139    1.011090    11.00000   -1.50000
H22B  2    0.733368   -0.278655    1.024741    11.00000   -1.50000
H22C  2    0.795321   -0.182981    1.056050    11.00000   -1.50000
AFIX   0

O3    6    0.563569    0.276779    0.806317    11.00000    0.13947    0.20924 =
         0.19439   -0.13523    0.04939    0.04778
AFIX   3
H3    2    0.611359    0.286329    0.817157    11.00000   -1.50000
AFIX   0
C3AA  1    0.543468    0.188780    0.769704    11.00000    0.04267    0.06536 =
         0.07101   -0.01429    0.03555   -0.00509
AFIX  23
H3AA  2    0.554486    0.118365    0.793136    11.00000   -1.20000
H3AB  2    0.576348    0.188664    0.744126    11.00000   -1.20000
AFIX   0

O2    6    0.210673    0.157987    0.796140    11.00000    0.08047    0.07929 =
         0.20038    0.00321    0.11030   -0.00158
C0AA  1    0.255103    0.246784    0.782527    11.00000    0.09584    0.07771 =
         0.16865    0.02784    0.04128   -0.00636
AFIX  23
H0AA  2    0.310943    0.235035    0.805041    11.00000   -1.20000
H0AB  2    0.239153    0.319604    0.795187    11.00000   -1.20000
AFIX   0
HKLF 4 1 0 0 -1 1 0 0 1 -2 1


REM  ty2_a P -1 R = 0.12 New: I2/c
REM R1 =  0.1348 for    3884 Fo > 4sig(Fo)  and  0.1494 for all    4584 data
REM    266 parameters refined using      1 restraints

END

WGHT      0.0000    653.3671

REM Instructions for potential hydrogen bonds
HTAB C4 O3
EQIV $6 -x+1/2, y-1/2, -z+2
HTAB C21 I001_$6
EQIV $3 x, -y+1, z+1/2
HTAB C17 I001_$3
EQIV $7 x+1/2, y-1/2, z+1/2
HTAB C20 I001_$7
EQIV $8 x+1/2, -y+1/2, z
HTAB O3 O2_$8

REM Highest difference peak  2.512,  deepest hole -3.788,  1-sigma level  0.275
Q1    1   0.3388  0.6957  0.8272  11.00000  0.05    2.51
Q2    1   0.1620  0.2285  0.7400  11.00000  0.05    2.18
Q3    1   0.3081  0.2615  0.8138  11.00000  0.05    2.18
Q4    1   0.1724  0.3779  0.7823  11.00000  0.05    1.87
Q5    1   0.2944  0.1270  0.7749  11.00000  0.05    1.72
Q6    1   0.5381  0.1857  0.7093  11.00000  0.05    1.52
Q7    1   0.1885  0.1669  0.8500  11.00000  0.05    1.43
Q8    1   0.1999  0.6547  0.6790  11.00000  0.05    1.43
Q9    1   0.4768  0.5957  0.8611  11.00000  0.05    1.39
Q10   1   0.1524  0.3738  0.7003  11.00000  0.05    1.37
Q11   1   0.5344  0.1937  1.1744  11.00000  0.05    1.17
Q12   1   0.3269  0.4978  0.7185  11.00000  0.05    1.07
Q13   1   0.1867  0.5010  0.7583  11.00000  0.05    1.02
Q14   1   0.2391  0.3350  0.8363  11.00000  0.05    1.02
Q15   1   0.7829 -0.1834  0.9880  11.00000  0.05    1.01
Q16   1   0.1899  0.1624  0.7372  11.00000  0.05    0.99
Q17   1   0.3024  0.4744  0.7796  11.00000  0.05    0.96
Q18   1   0.1547  0.5065  0.6716  11.00000  0.05    0.93
Q19   1   0.2155  0.5592  0.7656  11.00000  0.05    0.93
Q20   1   0.7308 -0.1351  0.9372  11.00000  0.05    0.90
;
_shelx_res_checksum                12922
_shelx_hkl_file
;
   1   0   0 6256.97  279.57
   1   0   0 6191.18  281.07
  -1   0   0 5470.35  281.27
   2   0   0  777.72   38.00
   2   0   0  760.12   39.40
   2   0   0  784.22   39.80
   2   0   0  798.02   37.60
   2   0   0  736.03   43.10
  -2   0   0  732.03   38.80
   3   0   0 1507.95   71.99
   3   0   0 1482.25   80.49
   3   0   0 1501.95   74.89
   3   0   0 1539.25   75.29
   3   0   0 1514.05   72.69
  -3   0   0 1373.86   74.09
   4   0   0  292.17   21.10
   4   0   0  268.07   28.20
   4   0   0  261.47   20.50
   4   0   0  272.27   16.60
   4   0   0  247.78   17.30
  -4   0   0  228.28   21.30
   5   0   0   -2.90   12.10
   5   0   0   -3.30    6.10
   5   0   0    1.40    7.00
   5   0   0    0.80    5.60
   5   0   0    4.40    4.70
  -5   0   0   -0.20   10.50
   6   0   0   56.99    9.50
   6   0   0   64.29   13.10
   6   0   0   82.89   21.20
   6   0   0   80.49   10.90
   6   0   0   58.69   13.00
  -6   0   0   61.89   15.40
   7   0   0   35.60    9.50
   7   0   0   45.50   13.60
   7   0   0   60.69   14.60
   7   0   0   33.30    7.90
   7   0   0   32.20   19.60
  -7   0   0   46.40   17.40
   8   0   0  254.37   30.70
   8   0   0  278.67   21.80
   8   0   0  314.57   46.50
   8   0   0  239.78   32.30
   8   0   0  230.68   23.70
  -8   0   0  250.57   34.90
   9   0   0   -1.50   23.40
   9   0   0   10.40   16.10
   9   0   0   19.30   10.90
   9   0   0    6.50    8.00
   9   0   0    0.50   15.80
  -9   0   0  -13.60   19.90
  10   0   0   11.30   12.10
  10   0   0   20.00    8.90
  10   0   0   22.70   19.40
  10   0   0   -9.60   17.60
  10   0   0  -23.00   25.00
 -10   0   0   16.80   20.80
  11   0   0  135.29   26.60
  11   0   0   59.59   32.50
  11   0   0  120.69   27.40
  12   0   0  491.25   54.79
  12   0   0  518.15   55.99
 -12   0   0  383.76   51.89
 -12   0   0  437.56   38.50
 -12   1   1   60.89   20.00
 -12   1   1   -0.90   24.40
  12  -1  -1   49.60   26.80
  12  -1  -1   62.49   27.60
 -11   1   1    2.40   15.10
 -11   1   1  -34.10   21.90
  11  -1  -1   16.20   22.10
  11  -1  -1   15.90   21.80
  11  -1  -1   -6.00   13.00
 -10   1   1    6.10   21.60
  10  -1  -1    3.90   18.10
  10  -1  -1    3.70   12.00
  10  -1  -1  -42.70   26.40
  10  -1  -1    4.10   17.70
  10  -1  -1    5.50    8.20
  -9   1   1   10.20   22.10
   9  -1  -1   -9.10   26.60
   9  -1  -1   22.00   17.60
   9  -1  -1   40.30   19.60
   9  -1  -1   29.30   10.30
   9  -1  -1   21.40   12.70
  -8   1   1   69.29   23.10
   8  -1  -1   94.19   20.60
   8  -1  -1  109.59   21.40
   8  -1  -1   93.19   14.00
   8  -1  -1   93.69   15.70
   8  -1  -1  110.09   33.40
  -7   1   1  256.47   34.40
   7  -1  -1  255.67   22.20
   7  -1  -1  254.27   28.10
   7  -1  -1  278.27   43.80
   7  -1  -1  285.97   29.90
   7  -1  -1  262.27   23.50
  -6   1   1  156.28   25.30
   6  -1  -1  111.89   25.10
   6  -1  -1  113.69   17.10
   6  -1  -1  136.59   19.80
   6  -1  -1  143.09   15.50
   6  -1  -1  138.29   15.80
  -5   1   1 2584.84  129.49
   5  -1  -1 2556.74  126.09
   5  -1  -1 2707.03  125.29
   5  -1  -1 2578.34  130.29
   5  -1  -1 2493.25  138.69
   5  -1  -1 2522.95  130.09
  -4   1   1 2284.37  109.49
   4  -1  -1 2097.39  116.69
   4  -1  -1 2129.49  109.69
   4  -1  -1 2349.76  106.09
   4  -1  -1 2083.79  106.39
   4  -1  -1 2134.69  109.59
  -3   1   1   31.70    9.50
   3  -1  -1   43.80   13.60
   3  -1  -1   25.20    7.10
   3  -1  -1   25.10    7.00
   3  -1  -1   26.00    6.60
   3  -1  -1   24.70    5.60
  -2   1   1 2045.70  102.89
   2  -1  -1 2028.60  107.09
   2  -1  -1 2316.87  101.99
   2  -1  -1 2092.49  102.79
   2  -1  -1 2132.69  101.59
   2  -1  -1 2101.89  103.09
  -1   1   1  128.39    7.50
  -1   1   1  123.19    8.30
   1  -1  -1  110.39    8.70
   1  -1  -1  112.69    8.10
   1  -1  -1  136.09    8.10
   1  -1  -1  115.19    7.80
   1  -1  -1  121.39   10.60
   0   1   1   -5.20    0.90
   0   1   1   -7.30    0.50
   0  -1  -1   -6.70    0.80
   0  -1  -1   -6.40    0.70
   0  -1  -1   -8.40    0.60
   1   1   1   10.50    1.70
   1   1   1    7.80    2.00
   1   1   1    5.00    2.00
   1   1   1    8.40    1.50
   1   1   1   10.00    2.90
   1   1   1    5.80    1.20
   2   1   1   46.50    5.10
   2   1   1   32.50    4.10
   2   1   1   38.90    5.80
   2   1   1   45.50    7.90
   2   1   1   32.10    5.10
  -2  -1  -1   32.90    5.10
   3   1   1  263.77   15.00
   3   1   1  237.38   23.00
   3   1   1  278.77   16.00
   3   1   1  266.97   18.10
   3   1   1  250.47   18.50
  -3  -1  -1  216.68   17.20
   4   1   1   74.99    8.90
   4   1   1   73.59    7.70
   4   1   1   78.69   15.80
   4   1   1   61.89   10.30
   4   1   1   63.89    9.80
  -4  -1  -1   68.09   11.90
   5   1   1   15.10    7.80
   5   1   1   14.80    7.70
   5   1   1   15.80    4.20
   5   1   1   14.00    5.50
   5   1   1    9.00   11.20
  -5  -1  -1   19.50    9.30
   6   1   1  112.99   13.10
   6   1   1  100.79   10.90
   6   1   1   90.79   14.00
   6   1   1   92.79   15.50
   6   1   1  103.29   21.40
  -6  -1  -1  101.19   16.00
   7   1   1 1813.22  101.69
   7   1   1 1825.52  111.89
   7   1   1 1926.91  101.49
   7   1   1 1801.82   95.49
   7   1   1 1944.41   93.89
  -7  -1  -1 2021.00  101.09
   8   1   1 1494.05   76.49
   8   1   1 1491.35   86.79
   8   1   1 1496.55   98.69
   8   1   1 1423.06   78.79
   8   1   1 1526.55   86.19
  -8  -1  -1 1586.34   86.49
   9   1   1  159.78   26.70
   9   1   1  189.48   37.90
   9   1   1  155.48   20.80
   9   1   1  151.78   24.10
   9   1   1  174.08   17.40
  -9  -1  -1  118.89   25.60
  10   1   1  207.28   19.00
  10   1   1  155.48   26.70
  10   1   1  111.59   32.50
  10   1   1  163.18   22.40
  10   1   1  138.79   24.20
 -10  -1  -1  241.38   36.40
  11   1   1  680.53   56.19
  11   1   1  512.95   39.50
  11   1   1  638.84   54.79
  11   1   1  545.95   69.39
 -11  -1  -1  469.35   50.79
  12   1   1  221.08   54.69
  12   1   1  325.37   45.40
  12   1   1  194.28   35.80
 -12  -1  -1  253.47   29.80
 -12  -1  -1  138.59   31.50
 -13  -1  -1   13.00   28.60
 -12   2   2   -2.50   25.80
 -11   2   2  -10.60   23.00
 -11   2   2   44.00   17.60
  11  -2  -2   20.40   16.70
  11  -2  -2   18.80   23.90
  11  -2  -2    6.00   23.90
 -10   2   2   18.90   23.00
  10  -2  -2   75.69   24.30
  10  -2  -2   72.19   13.70
  10  -2  -2   50.29   17.10
  10  -2  -2   49.30   24.00
  -9   2   2  119.09   25.00
   9  -2  -2  118.79   18.70
   9  -2  -2   99.69   23.00
   9  -2  -2  133.59   25.10
  -8   2   2   88.99   25.60
   8  -2  -2  116.49   17.90
   8  -2  -2  132.89   23.90
   8  -2  -2  121.59   17.10
   8  -2  -2  140.49   24.50
  -7   2   2 1250.87   76.29
   7  -2  -2 1285.07   87.09
   7  -2  -2 1296.27   67.99
   7  -2  -2 1244.68   75.19
   7  -2  -2 1261.37   74.19
   7  -2  -2 1247.48   69.19
  -6   2   2 1959.30  103.49
   6  -2  -2 1918.61  102.89
   6  -2  -2 1942.31  113.29
   6  -2  -2 1887.61   98.59
   6  -2  -2 2005.90   97.89
   6  -2  -2 1917.71  103.69
  -5   2   2   85.19   15.60
   5  -2  -2   65.49   10.20
   5  -2  -2   41.40   10.80
   5  -2  -2   59.09    9.60
   5  -2  -2   73.89   20.10
   5  -2  -2   60.39   12.00
  -4   2   2  904.31   53.99
   4  -2  -2  957.30   53.59
   4  -2  -2 1039.00   51.99
   4  -2  -2  968.70   61.99
   4  -2  -2  959.20   54.69
   4  -2  -2  991.60   51.39
  -3   2   2 3031.90  135.99
  -3   2   2 2780.92  138.19
   3  -2  -2 2823.32  136.89
   3  -2  -2 2762.02  139.09
   3  -2  -2 2963.70  137.19
   3  -2  -2 2821.32  143.69
   3  -2  -2 2707.23  138.39
  -2   2   2 1425.96   69.69
  -2   2   2 1488.35   68.59
   2  -2  -2 1314.67   69.49
   2  -2  -2 1505.55   69.59
   2  -2  -2 1359.96   70.49
   2  -2  -2 1323.17   68.89
  -1   2   2  443.76   24.40
  -1   2   2  469.55   24.30
   1  -2  -2  468.95   24.70
   1  -2  -2  486.85   24.80
   1  -2  -2  461.25   25.50
   0   2   2 5181.08  240.38
   0  -2  -2 5433.86  240.48
   0  -2  -2 4902.91  239.88
   0  -2  -2 4931.41  239.88
   1   2   2 2623.24  130.79
   1   2   2 2788.12  131.99
   1   2   2 2529.35  130.89
   1   2   2 2915.81  130.59
   1   2   2 2875.61  130.39
   1   2   2 2714.13  130.79
  -1  -2  -2 2757.52  130.19
  -1  -2  -2 2770.72  129.89
  -1  -2  -2 2737.93  131.59
  -1  -2  -2 2969.60  130.59
   2   2   2  302.57   20.00
   2   2   2  314.57   16.30
   2   2   2  278.57   16.60
   2   2   2  309.47   18.50
   2   2   2  302.37   16.30
   2   2   2  314.87   17.50
   3   2   2 3148.98  149.49
   3   2   2 3118.59  152.58
   3   2   2 3123.09  148.29
   3   2   2 2930.41  146.09
   3   2   2 3233.58  146.89
   3   2   2 3098.89  145.99
  -3  -2  -2 2969.60  146.59
  -3  -2  -2 3045.00  146.69
   4   2   2 1383.46   67.89
   4   2   2 1416.16   66.99
   4   2   2 1342.37   76.09
   4   2   2 1347.07   71.39
   4   2   2 1374.96   70.39
  -4  -2  -2 1340.47   68.59
   5   2   2   46.60    7.40
   5   2   2   38.10    7.30
   5   2   2   48.90   15.00
   5   2   2   42.50    9.30
   5   2   2   43.30   10.00
  -5  -2  -2   51.19    9.90
   6   2   2 2982.10  157.68
   6   2   2 2994.10  149.59
   6   2   2 2956.10  144.09
   6   2   2 2978.30  148.29
   6   2   2 3029.70  142.49
  -6  -2  -2 2800.92  145.79
   7   2   2  783.42   47.70
   7   2   2  759.92   57.69
   7   2   2  762.62   42.30
   7   2   2  727.43   40.10
   7   2   2  748.73   48.40
  -7  -2  -2  664.93   46.40
   8   2   2   56.09   14.20
   8   2   2   42.10   19.90
   8   2   2   56.59   15.80
   8   2   2   57.89    9.90
  -8  -2  -2   77.09   20.10
   9   2   2  812.42   45.70
   9   2   2  890.31   57.99
   9   2   2  766.12   48.20
   9   2   2  826.72   58.99
   9   2   2  807.42   71.29
  -9  -2  -2  837.22   58.29
  10   2   2  490.95   46.50
  10   2   2  421.46   33.80
  10   2   2  484.05   30.80
  10   2   2  513.25   46.10
  10   2   2  516.35   59.49
 -10  -2  -2  488.45   47.00
  11   2   2   86.59   25.90
  11   2   2   87.29   22.90
  11   2   2   95.99   37.10
  11   2   2   85.09   16.80
 -11  -2  -2   70.29   24.30
  12   2   2   25.60   20.70
  12   2   2   22.20   23.00
  12   2   2  -17.80   30.00
 -12  -2  -2    5.30   23.80
 -12  -2  -2   12.80   15.00
  13   2   2  -38.40   36.50
  13   2   2   40.60   25.50
  13   2   2   40.60   24.50
 -13  -2  -2    9.30   24.60
 -13  -2  -2   37.50   17.70
 -11   3   3  502.95   40.00
  11  -3  -3  419.46   44.90
  11  -3  -3  497.35   59.09
  11  -3  -3  493.35   52.99
 -10   3   3   27.60   23.70
  10  -3  -3   66.59   25.10
  10  -3  -3  114.09   24.90
  10  -3  -3   73.79   19.10
  10  -3  -3   55.59   15.50
  -9   3   3  133.89   28.10
   9  -3  -3  165.58   23.80
   9  -3  -3  237.78   33.60
   9  -3  -3  207.98   31.50
  -8   3   3  643.84   54.39
   8  -3  -3  637.64   45.00
   8  -3  -3  638.44   43.40
   8  -3  -3  653.73   51.99
   8  -3  -3  655.03   50.19
  -7   3   3  616.84   49.80
   7  -3  -3  613.24   41.40
   7  -3  -3  640.24   47.60
   7  -3  -3  594.74   41.40
   7  -3  -3  635.24   45.60
  -6   3   3   92.79   19.80
   6  -3  -3   62.89   14.20
   6  -3  -3   64.99   12.40
   6  -3  -3   77.39   13.90
   6  -3  -3   54.69   13.20
  -5   3   3  161.98   24.80
  -5   3   3  142.89   13.80
   5  -3  -3  141.09   17.40
   5  -3  -3  174.08   21.20
   5  -3  -3  144.49   21.10
   5  -3  -3  152.88   18.60
  -4   3   3  323.27   26.20
  -4   3   3  316.57   20.20
   4  -3  -3  287.57   23.00
   4  -3  -3  313.27   22.90
   4  -3  -3  282.17   25.90
   4  -3  -3  327.37   24.40
  -3   3   3  196.88   17.30
  -3   3   3  189.28   14.10
   3  -3  -3  145.69   15.20
   3  -3  -3  144.89   17.70
  -2   3   3  155.28   13.30
  -2   3   3  160.48   12.10
   2  -3  -3  147.89   12.20
   2  -3  -3  149.39   14.60
   2  -3  -3  140.79   12.60
   2  -3  -3  164.08   13.70
  -1   3   3 2759.32  130.39
  -1   3   3 2577.34  129.19
   1  -3  -3 2914.61  130.59
   1  -3  -3 2698.73  130.89
   1  -3  -3 2658.33  130.09
   0   3   3    3.20    3.70
   0   3   3    5.80    2.80
   0  -3  -3    9.00    4.20
   0  -3  -3   11.30    3.60
   0  -3  -3    7.70    3.90
   1   3   3 2109.79  109.09
   1   3   3 2178.38  108.99
   1   3   3 2334.47  108.09
   1   3   3 2257.27  109.49
  -1  -3  -3 2363.06  108.49
  -1  -3  -3 2387.86  108.19
  -1  -3  -3 2324.07  109.69
   2   3   3 1286.17   63.19
   2   3   3 1386.76   62.79
   2   3   3 1282.67   62.89
   2   3   3 1307.47   66.29
   2   3   3 1183.78   63.49
   2   3   3 1253.07   64.19
  -2  -3  -3 1277.27   62.39
  -2  -3  -3 1352.76   62.69
  -2  -3  -3 1311.37   64.79
   3   3   3 3402.86  178.68
   3   3   3 3949.20  178.78
   3   3   3 3783.22  179.78
   3   3   3 3890.51  181.68
   3   3   3 3854.31  178.68
   3   3   3 3754.72  184.28
   4   3   3 4073.49  184.68
   4   3   3 4027.20  188.38
   4   3   3 3964.90  183.78
   4   3   3 3861.61  192.18
   4   3   3 3954.80  186.58
   4   3   3 3609.34  183.88
  -4  -3  -3 3850.01  184.58
  -4  -3  -3 3665.23  184.58
   5   3   3 3651.13  171.58
   5   3   3 3472.45  176.88
   5   3   3 3500.85  169.48
   5   3   3 3596.14  165.48
   5   3   3 3276.97  165.78
   5   3   3 3498.35  166.58
  -5  -3  -3 3531.75  167.38
  -5  -3  -3 3211.38  166.18
   6   3   3 1348.47   71.99
   6   3   3 1352.66   66.59
   6   3   3 1331.87   67.89
   6   3   3 1313.37   80.69
   6   3   3 1334.47   73.69
  -6  -3  -3 1265.77   69.69
   7   3   3   40.60    8.30
   7   3   3   40.50   12.60
   7   3   3   28.00   10.40
   7   3   3   23.30   15.90
   7   3   3   31.40    6.90
  -7  -3  -3   39.90   12.90
   8   3   3   30.20    7.80
   8   3   3   14.10   17.40
   8   3   3   40.00   14.40
   8   3   3   25.00    7.10
   8   3   3   30.80   12.00
  -8  -3  -3   18.70   15.50
   9   3   3   20.60    7.80
   9   3   3   24.60   13.60
   9   3   3   -4.20   14.40
   9   3   3   15.20    8.60
   9   3   3  -11.70   20.40
  -9  -3  -3    8.10   19.90
  10   3   3   19.90    7.20
  10   3   3    7.60   16.10
  10   3   3    2.90    8.20
  10   3   3   30.30   24.40
  10   3   3   26.30   15.10
 -10  -3  -3   35.40   21.40
  11   3   3  175.58   30.40
  11   3   3  166.88   40.10
  11   3   3  253.27   35.00
 -11  -3  -3  160.58   28.70
 -11  -3  -3  213.88   24.50
  12   3   3  154.58   43.30
  12   3   3  147.09   31.90
  12   3   3  118.59   26.20
 -12  -3  -3  122.09   20.40
 -12  -3  -3  120.19   28.70
  13   3   3   61.69   24.70
  13   3   3   57.09   41.30
  13   3   3   75.49   26.80
 -13  -3  -3   66.29   28.20
 -13  -3  -3   72.79   18.90
 -11   4   4  -49.00   25.10
  11  -4  -4   20.30   21.70
  11  -4  -4   30.60   28.50
 -10   4   4   16.60   26.30
 -10   4   4   64.29   18.20
  10  -4  -4   49.40   21.30
  10  -4  -4   50.79   27.50
  10  -4  -4   88.29   26.40
  -9   4   4   13.00   23.60
   9  -4  -4   62.79   19.20
   9  -4  -4   64.29   23.70
   9  -4  -4   65.19   15.70
   9  -4  -4   91.99   22.30
  -8   4   4  -15.00   20.90
   8  -4  -4   20.80   15.00
   8  -4  -4    4.80   16.80
   8  -4  -4   15.20   14.60
   8  -4  -4   17.00   17.80
  -7   4   4   51.29   22.40
   7  -4  -4   50.99   17.10
   7  -4  -4   72.89   17.10
   7  -4  -4   62.59   19.40
   7  -4  -4   59.49   19.10
  -6   4   4  181.38   25.30
   6  -4  -4  181.08   27.70
   6  -4  -4  158.98   22.90
   6  -4  -4  159.88   20.50
   6  -4  -4  165.18   23.50
  -5   4   4  103.19   17.50
  -5   4   4  130.49   15.10
   5  -4  -4  131.79   18.10
   5  -4  -4   84.79   15.90
   5  -4  -4  162.08   23.20
   5  -4  -4  133.69   18.90
  -4   4   4 1000.40   53.59
  -4   4   4 1053.69   56.99
   4  -4  -4 1032.50   56.79
   4  -4  -4 1035.00   55.99
   4  -4  -4 1034.60   59.09
   4  -4  -4 1012.00   56.49
  -3   4   4 2293.47  111.49
  -3   4   4 2334.37  111.09
   3  -4  -4 2269.47  111.99
   3  -4  -4 2171.48  111.89
   3  -4  -4 2266.77  114.39
   3  -4  -4 2258.17  112.19
  -2   4   4  731.43   38.00
   2  -4  -4  757.72   38.50
   2  -4  -4  658.63   37.90
   2  -4  -4  623.04   39.00
  -1   4   4  287.27   18.70
  -1   4   4  343.87   20.50
   1  -4  -4  309.97   20.80
   1  -4  -4  345.27   20.50
   1  -4  -4  324.37   20.10
   0   4   4  493.05   27.00
   0  -4  -4  442.16   25.90
   0  -4  -4  512.55   26.90
   0  -4  -4  446.56   25.60
   1   4   4 1379.26   70.09
   1   4   4 1455.15   70.39
  -1  -4  -4 1408.86   68.89
  -1  -4  -4 1417.96   70.29
  -1  -4  -4 1411.06   69.09
   2   4   4 1455.05   77.59
   2   4   4 1439.46   75.79
   2   4   4 1583.44   75.69
   2   4   4 1586.54   74.29
   2   4   4 1628.84   74.69
  -2  -4  -4 1543.95   76.79
  -2  -4  -4 1612.24   74.89
  -2  -4  -4 1536.55   73.59
  -2  -4  -4 1486.85   74.09
   3   4   4  414.16   21.50
   3   4   4  391.06   24.40
   3   4   4  402.36   22.40
   3   4   4  392.16   22.30
   3   4   4  379.06   26.60
   3   4   4  357.86   22.60
  -3  -4  -4  382.46   21.20
  -3  -4  -4  385.56   21.30
  -3  -4  -4  398.76   23.90
   4   4   4  326.57   19.10
   4   4   4  326.07   23.50
   4   4   4  303.37   26.30
   4   4   4  326.27   18.90
   4   4   4  305.77   19.60
   4   4   4  299.97   20.70
  -4  -4  -4  311.77   19.70
  -4  -4  -4  317.17   18.20
  -4  -4  -4  308.87   20.60
   5   4   4   87.89   14.50
   5   4   4   89.19   10.00
   5   4   4   74.99   10.90
   5   4   4   90.49   10.00
   5   4   4   70.89   11.00
   5   4   4   80.19   16.30
  -5  -4  -4   74.99   11.00
  -5  -4  -4   78.69   12.10
   6   4   4  486.75   27.00
   6   4   4  445.46   33.40
   6   4   4  425.66   27.70
   6   4   4  469.25   40.10
   6   4   4  458.05   31.20
   6   4   4  475.35   27.70
  -6  -4  -4  482.95   30.40
  -6  -4  -4  435.26   28.20
   7   4   4  139.69   14.80
   7   4   4  149.88   13.80
   7   4   4  146.29   14.20
   7   4   4  127.59   18.80
   7   4   4  151.98   21.60
   7   4   4  139.79   27.30
  -7  -4  -4  128.29   15.00
  -7  -4  -4  131.59   20.60
   8   4   4   36.00   11.30
   8   4   4   41.70    8.40
   8   4   4   40.50    8.50
   8   4   4   33.00   14.40
   8   4   4   50.49   22.00
  -8  -4  -4   32.70   15.70
   9   4   4  488.05   56.29
   9   4   4  537.45   41.90
   9   4   4  503.55   44.50
   9   4   4  579.54   33.60
   9   4   4  479.15   33.90
  -9  -4  -4  611.14   46.50
  10   4   4  491.95   45.80
  10   4   4  490.85   59.09
  10   4   4  498.75   43.50
  10   4   4  526.35   32.60
  10   4   4  464.05   33.90
 -10  -4  -4  521.15   47.60
  11   4   4   31.00   26.00
  11   4   4   34.80   17.00
  11   4   4   51.79   20.20
 -11  -4  -4   17.00   21.10
 -11  -4  -4   22.70   12.00
  12   4   4  430.76   45.70
  12   4   4  380.86   62.79
  12   4   4  372.36   46.50
 -12  -4  -4  422.36   48.30
 -12  -4  -4  382.46   33.90
  13   4   4  170.18   34.10
  13   4   4  150.98   30.30
  13   4   4  207.48   50.19
 -13  -4  -4  143.99   31.60
 -13  -4  -4  224.58   28.60
  10  -5  -5   25.80   25.80
  10  -5  -5    2.50   19.10
   9  -5  -5   24.90   20.10
   9  -5  -5   54.59   16.80
   9  -5  -5   38.60   22.80
   8  -5  -5  519.85   42.40
   8  -5  -5  579.14   51.09
   8  -5  -5  590.44   46.80
   8  -5  -5  590.74   45.20
  -7   5   5  504.25   48.40
   7  -5  -5  662.03   51.29
   7  -5  -5  728.53   46.80
   7  -5  -5  589.84   46.20
   7  -5  -5  609.34   45.90
  -6   5   5   31.30   17.40
   6  -5  -5   41.30   14.00
   6  -5  -5   34.20   16.40
   6  -5  -5   28.30   15.30
   6  -5  -5   46.10   15.30
  -5   5   5  231.28   26.30
  -5   5   5  199.68   20.00
   5  -5  -5  233.58   23.00
   5  -5  -5  225.78   27.00
   5  -5  -5  208.08   27.10
   5  -5  -5  229.48   23.30
  -4   5   5  167.88   17.20
   4  -5  -5  141.79   21.50
  -3   5   5  532.55   32.40
  -3   5   5  558.74   32.40
   3  -5  -5  527.35   34.60
   3  -5  -5  525.25   35.50
   3  -5  -5  547.05   32.30
   3  -5  -5  571.64   33.80
  -2   5   5 4482.95  206.58
  -2   5   5 3871.01  204.78
   2  -5  -5 4234.78  207.68
   2  -5  -5 4512.95  206.88
   2  -5  -5 4403.36  206.38
  -1   5   5 1644.34   80.29
   1  -5  -5 1675.73   80.29
   1  -5  -5 1588.54   79.59
   1  -5  -5 1464.25   79.99
   0   5   5   29.70    6.70
   0   5   5   23.60    4.90
   0  -5  -5   30.40    6.50
   0  -5  -5   26.20    6.00
   0  -5  -5   27.40    6.00
   1   5   5  155.28   15.40
   1   5   5  136.29   13.50
  -1  -5  -5  145.09   12.00
  -1  -5  -5  152.98   12.50
  -1  -5  -5  150.38   12.80
   2   5   5 1106.09   61.79
   2   5   5 1274.47   61.29
   2   5   5 1170.98   61.09
   2   5   5 1226.58   59.19
  -2  -5  -5 1193.38   58.99
  -2  -5  -5 1200.18   61.69
  -2  -5  -5 1217.38   59.69
   3   5   5 1507.55   79.39
   3   5   5 1352.46   75.69
   3   5   5 1608.64   74.29
   3   5   5 1556.44   75.69
   3   5   5 1450.75   75.89
   3   5   5 1529.45   74.09
  -3  -5  -5 1556.14   74.39
  -3  -5  -5 1489.05   73.69
  -3  -5  -5 1540.45   77.39
  -3  -5  -5 1558.14   73.39
   4   5   5 3213.08  155.58
   4   5   5 3104.29  159.28
   4   5   5 3274.47  152.88
   4   5   5 3244.08  151.88
   4   5   5 3165.78  152.68
   4   5   5 3039.70  153.18
  -4  -5  -5 3182.28  151.38
  -4  -5  -5 3255.87  151.38
  -4  -5  -5 3184.68  151.58
  -4  -5  -5 3085.39  155.18
   5   5   5 2664.63  133.89
   5   5   5 2557.84  132.99
   5   5   5 2836.52  132.69
   5   5   5 2799.12  142.79
   5   5   5 2853.31  137.59
   5   5   5 2803.92  132.29
  -5  -5  -5 2634.84  134.19
  -5  -5  -5 2681.83  135.69
  -5  -5  -5 2813.62  132.99
  -5  -5  -5 2746.73  131.59
   6   5   5 1362.66   73.89
   6   5   5 1430.66   84.39
   6   5   5 1436.66   71.39
   6   5   5 1416.96   77.59
   6   5   5 1346.77   72.19
   6   5   5 1485.15   71.69
  -6  -5  -5 1398.56   73.39
  -6  -5  -5 1426.16   72.89
   7   5   5  186.98   23.20
   7   5   5  185.68   16.50
   7   5   5  236.58   17.00
   7   5   5  196.08   18.70
   7   5   5  196.08   30.40
   7   5   5  206.28   20.70
  -7  -5  -5  207.88   21.70
  -7  -5  -5  194.18   18.60
   8   5   5  548.15   32.90
   8   5   5  525.35   41.20
   8   5   5  534.35   31.90
   8   5   5  545.85   37.90
   8   5   5  527.05   33.50
   8   5   5  558.24   52.19
  -8  -5  -5  469.35   38.10
   9   5   5  104.99   20.90
   9   5   5  102.09   18.50
   9   5   5  109.89   15.10
   9   5   5  132.69   32.90
   9   5   5  100.09   15.30
  -9  -5  -5   87.99   21.70
  10   5   5  148.19   34.80
  10   5   5  175.48   28.00
  10   5   5  152.98   23.80
  10   5   5  177.28   19.90
  10   5   5  206.28   20.00
 -10  -5  -5  188.58   22.30
 -10  -5  -5  170.08   27.10
  11   5   5  315.37   39.40
  11   5   5  325.87   35.70
  11   5   5  351.56   53.69
 -11  -5  -5  306.47   40.60
 -11  -5  -5  266.27   27.30
  12   5   5   16.20   20.30
  12   5   5   10.70   15.30
  12   5   5   30.40   29.00
 -12  -5  -5    9.10   22.80
 -12  -5  -5   18.40   13.60
  13   5   5  124.59   25.70
  13   5   5  144.39   43.20
  13   5   5  157.78   32.70
 -13  -5  -5  184.38   27.50
 -13  -5  -5  137.69   30.20
   9  -6  -6    9.70   20.00
   9  -6  -6   36.50   24.40
   9  -6  -6   46.90   17.40
   8  -6  -6   66.99   21.40
   8  -6  -6   36.60   20.90
   8  -6  -6   48.20   18.40
   7  -6  -6  526.55   42.10
   7  -6  -6  530.15   46.60
   7  -6  -6  440.96   41.70
  -6   6   6  501.45   42.30
   6  -6  -6  574.54   46.10
   6  -6  -6  602.24   42.40
   6  -6  -6  525.95   43.20
  -5   6   6   22.50   14.00
  -5   6   6   38.40   10.90
   5  -6  -6   39.80   15.40
   5  -6  -6   41.10   15.90
   5  -6  -6   28.40   11.60
  -4   6   6  285.37   22.80
  -4   6   6  241.88   23.60
   4  -6  -6  220.18   27.20
   4  -6  -6  239.68   21.80
   4  -6  -6  265.07   24.90
   4  -6  -6  265.17   27.70
  -3   6   6  326.17   23.90
   3  -6  -6  282.57   26.20
   3  -6  -6  269.57   23.60
   3  -6  -6  274.57   25.80
  -2   6   6  185.08   17.90
   2  -6  -6  156.08   18.50
   2  -6  -6  177.78   18.90
   2  -6  -6  166.98   17.40
  -1   6   6  620.44   35.30
   1  -6  -6  529.15   34.80
   1  -6  -6  579.14   34.40
   1  -6  -6  598.44   34.70
   0   6   6  864.21   45.80
   0  -6  -6  773.92   44.10
   0  -6  -6  877.11   45.40
   0  -6  -6  775.72   43.90
   1   6   6 1381.56   69.49
  -1  -6  -6 1378.06   69.09
  -1  -6  -6 1276.97   67.49
  -1  -6  -6 1328.07   67.69
   2   6   6   24.40    7.10
   2   6   6   33.10    8.50
   2   6   6   28.50    6.80
  -2  -6  -6   24.50    6.60
  -2  -6  -6   27.40    6.30
  -2  -6  -6   25.40    6.40
   3   6   6  464.45   31.80
   3   6   6  494.95   27.10
   3   6   6  527.85   30.10
   3   6   6  478.25   29.90
   3   6   6  473.35   26.80
  -3  -6  -6  512.75   26.10
  -3  -6  -6  473.95   27.00
  -3  -6  -6  500.15   27.80
  -3  -6  -6  497.35   30.30
   4   6   6 2563.84  130.59
   4   6   6 2743.53  129.59
   4   6   6 2673.63  127.89
   4   6   6 2731.03  127.79
   4   6   6 2574.84  129.79
   4   6   6 2561.04  134.79
  -4  -6  -6 2743.83  126.99
  -4  -6  -6 2706.83  127.89
  -4  -6  -6 2591.24  127.19
  -4  -6  -6 2579.44  131.49
   5   6   6   31.30    7.50
   5   6   6   24.00    9.40
   5   6   6   24.10    6.40
   5   6   6   26.80    5.80
   5   6   6   14.70   10.50
   5   6   6   25.40    7.00
  -5  -6  -6   18.50    6.00
  -5  -6  -6   30.60    7.10
  -5  -6  -6   35.30    6.60
  -5  -6  -6   28.40    6.10
  -5  -6  -6   29.50    6.40
   6   6   6  965.00   55.89
   6   6   6  975.10   49.50
   6   6   6  905.51   50.99
   6   6   6  950.70   62.29
   6   6   6  930.41   51.49
   6   6   6  962.40   50.09
  -6  -6  -6  935.21   50.49
  -6  -6  -6  933.11   49.00
  -6  -6  -6  948.01   48.90
  -6  -6  -6  914.41   53.09
  -6  -6  -6  925.31   49.20
  -6  -6  -6  906.51   51.99
   7   6   6  334.57   25.80
   7   6   6  344.27   22.80
   7   6   6  349.37   30.40
   7   6   6  336.57   22.80
   7   6   6  332.17   36.50
   7   6   6  321.07   25.10
  -7  -6  -6  322.37   22.10
  -7  -6  -6  329.77   26.20
  -7  -6  -6  317.47   25.30
  -7  -6  -6  338.57   23.10
   8   6   6  108.49   26.90
   8   6   6  102.99   13.00
   8   6   6   97.69   14.40
   8   6   6  110.29   20.10
   8   6   6  104.79   16.00
   8   6   6   96.89   14.20
  -8  -6  -6  108.99   18.10
  -8  -6  -6   97.09   13.20
  -8  -6  -6  118.19   18.30
   9   6   6  971.50   51.19
   9   6   6  886.81   50.89
   9   6   6  882.11   60.99
   9   6   6  911.71   73.89
   9   6   6  853.21   56.29
  -9  -6  -6  899.01   51.49
  -9  -6  -6  890.21   57.79
  10   6   6  289.67   24.10
  10   6   6  309.57   36.80
  10   6   6  268.47   25.10
  10   6   6  329.47   49.80
  10   6   6  266.87   32.00
 -10  -6  -6  278.27   35.60
 -10  -6  -6  303.57   26.40
  11   6   6   83.59   18.20
  11   6   6   61.59   21.90
  11   6   6  133.09   34.60
 -11  -6  -6   79.09   23.50
 -11  -6  -6   64.09   14.50
  12   6   6   77.49   31.80
  12   6   6   87.49   24.30
  12   6   6   92.19   20.90
 -12  -6  -6   84.39   16.70
 -12  -6  -6   88.59   26.50
  13   6   6   68.19   33.80
  13   6   6   58.89   19.30
  13   6   6   61.09   26.30
 -13  -6  -6   73.39   28.10
 -13  -6  -6   52.39   17.10
   9  -7  -7   44.30   23.60
   9  -7  -7   44.50   25.70
   9  -7  -7   60.29   19.10
   8  -7  -7   31.90   17.90
   8  -7  -7   63.89   23.60
   8  -7  -7   51.19   21.60
   7  -7  -7   -6.20   16.20
   7  -7  -7   12.40   18.10
   7  -7  -7   19.90   17.00
   6  -7  -7   83.59   21.90
   6  -7  -7   68.49   19.70
   6  -7  -7   55.79   19.40
  -5   7   7  -18.50    9.60
   5  -7  -7   -5.40   15.00
   5  -7  -7  -18.40   14.30
   5  -7  -7  -14.70   12.70
  -4   7   7   27.00   11.20
   4  -7  -7   20.60   14.90
   4  -7  -7   27.50   14.20
   4  -7  -7   34.10   13.60
  -3   7   7   93.49   16.50
  -3   7   7  104.89   18.80
   3  -7  -7  102.69   17.00
   3  -7  -7  103.89   16.70
   3  -7  -7  127.69   16.80
  -2   7   7 1170.58   62.09
  -2   7   7 1188.18   64.39
   2  -7  -7 1174.98   63.79
   2  -7  -7 1199.28   64.69
   2  -7  -7 1174.98   65.39
  -1   7   7 1166.18   60.59
   1  -7  -7 1048.40   59.09
   1  -7  -7 1119.49   59.89
   1  -7  -7 1074.49   60.19
   0   7   7   15.00    7.60
   0  -7  -7    8.20    7.50
   0  -7  -7    2.10    7.20
   0  -7  -7   10.90    6.80
   1   7   7 2074.29  104.69
  -1  -7  -7 2102.39  102.89
  -1  -7  -7 2111.79  104.49
  -1  -7  -7 2020.50  102.49
   2   7   7 3441.66  183.78
   2   7   7 3904.01  185.18
   2   7   7 3895.21  184.68
  -2  -7  -7 3964.90  184.98
  -2  -7  -7 3802.32  181.88
  -2  -7  -7 3779.02  182.28
   3   7   7  599.64   35.70
   3   7   7  547.75   36.20
   3   7   7  608.64   36.10
  -3  -7  -7  601.44   35.60
  -3  -7  -7  574.54   32.70
  -3  -7  -7  555.24   32.30
   4   7   7 2498.05  117.29
   4   7   7 2320.97  124.29
   4   7   7 2424.06  119.89
   4   7   7 2495.45  120.29
   4   7   7 2358.06  120.39
   4   7   7 2433.56  117.39
  -4  -7  -7 2496.85  116.39
  -4  -7  -7 2441.36  121.89
  -4  -7  -7 2326.47  116.89
  -4  -7  -7 2396.36  117.79
   5   7   7  537.75   39.50
   5   7   7  508.75   34.20
   5   7   7  526.75   32.30
   5   7   7  537.35   29.60
   5   7   7  483.35   32.40
   5   7   7  512.35   30.80
  -5  -7  -7  525.25   29.30
  -5  -7  -7  517.15   29.90
  -5  -7  -7  514.55   30.00
  -5  -7  -7  504.55   33.30
   6   7   7   31.10    7.10
   6   7   7   28.10    8.90
   6   7   7   38.60    8.30
   6   7   7   35.40   14.00
   6   7   7   38.70    9.00
   6   7   7   26.50   11.20
  -6  -7  -7   26.30    7.50
  -6  -7  -7   38.50    8.70
  -6  -7  -7   34.50    9.00
  -6  -7  -7   38.90    8.20
  -6  -7  -7   41.70    9.10
  -6  -7  -7   34.20    7.80
   7   7   7   52.29    8.70
   7   7   7   56.49   18.20
   7   7   7   49.90   11.10
   7   7   7   42.60   10.10
   7   7   7   32.30   13.20
   7   7   7   44.60    8.90
  -7  -7  -7   55.89   10.10
  -7  -7  -7   45.70   10.10
  -7  -7  -7   60.09    9.50
  -7  -7  -7   49.80    9.60
  -7  -7  -7   48.30   10.90
  -7  -7  -7   64.19   12.30
   8   7   7   20.40    7.50
   8   7   7   26.50   10.40
   8   7   7   15.80   13.10
   8   7   7   27.10   10.20
   8   7   7   24.30    8.30
   8   7   7   24.20   17.60
  -8  -7  -7   30.20   10.00
  -8  -7  -7   26.60    9.40
  -8  -7  -7   28.10    9.20
  -8  -7  -7   18.00    7.70
  -8  -7  -7   16.50   12.70
  -8  -7  -7   15.20    7.70
   9   7   7   13.30   17.20
   9   7   7   19.70   12.20
   9   7   7   40.80    9.80
   9   7   7   38.40    9.90
   9   7   7   43.10   23.40
  -9  -7  -7   26.10    9.60
  -9  -7  -7   14.30   16.40
  -9  -7  -7   19.00   11.40
  10   7   7   75.59   22.40
  10   7   7   88.09   30.10
  10   7   7   97.49   18.30
  10   7   7   91.29   13.50
 -10  -7  -7  106.29   21.30
 -10  -7  -7   66.39   14.40
  11   7   7  386.76   35.50
  11   7   7  330.97   40.50
  11   7   7  385.66   55.39
 -11  -7  -7  356.06   40.20
 -11  -7  -7  338.77   29.80
  12   7   7   21.30   14.50
  12   7   7   56.39   31.70
  12   7   7   24.50   19.20
 -12  -7  -7   24.10   12.90
 -12  -7  -7   12.20   21.30
  13   7   7   93.99   29.00
  13   7   7  116.69   38.20
  13   7   7  145.39   24.30
 -13  -7  -7   83.49   18.00
 -13  -7  -7  126.79   29.60
   8  -8  -8   20.20   21.30
   8  -8  -8   -1.70   17.50
   8  -8  -8   21.60   21.60
   7  -8  -8  300.07   38.10
   7  -8  -8  281.87   39.90
   7  -8  -8  269.87   37.40
   6  -8  -8  344.17   39.20
   6  -8  -8  217.08   34.20
   6  -8  -8  330.87   35.30
  -5   8   8    3.50   13.70
   5  -8  -8   29.00   16.30
   5  -8  -8   20.00   17.30
   5  -8  -8   17.40   15.60
  -4   8   8  542.65   38.40
   4  -8  -8  465.25   41.30
   4  -8  -8  587.64   41.90
   4  -8  -8  598.84   44.90
  -3   8   8 1533.15   79.59
   3  -8  -8 1296.87   79.49
   3  -8  -8 1477.35   82.19
   3  -8  -8 1531.65   80.19
  -2   8   8 1031.20   55.29
   2  -8  -8  856.71   54.09
   2  -8  -8  882.31   55.19
   2  -8  -8  928.01   53.89
  -1   8   8   72.19   13.20
   1  -8  -8   70.59   14.90
   1  -8  -8  113.09   17.70
   1  -8  -8   81.79   14.20
   0   8   8    3.40    8.40
   0   8   8    2.00    5.40
   0  -8  -8   12.80    8.00
   0  -8  -8    7.90    8.40
   0  -8  -8   14.50    8.90
   1   8   8  106.99   17.10
   1   8   8   90.79   11.90
  -1  -8  -8  117.99   14.50
  -1  -8  -8  105.99   15.10
  -1  -8  -8  110.79   15.20
   2   8   8  812.42   47.20
   2   8   8  703.33   44.80
  -2  -8  -8  820.32   46.70
  -2  -8  -8  825.22   44.50
  -2  -8  -8  862.51   44.90
   3   8   8  858.21   50.89
   3   8   8  877.41   51.49
   3   8   8  864.11   50.39
  -3  -8  -8  887.21   47.50
  -3  -8  -8  900.21   50.39
  -3  -8  -8  865.41   46.70
   4   8   8   48.20   10.60
   4   8   8   96.29   16.40
   4   8   8   74.89   12.40
  -4  -8  -8  100.39   12.80
  -4  -8  -8   51.79    9.30
  -4  -8  -8   89.49   12.70
   5   8   8    4.20    8.50
   5   8   8   15.60    7.60
   5   8   8    8.70    5.00
   5   8   8   13.30    9.60
   5   8   8    7.40    9.50
   5   8   8    9.40    8.40
  -5  -8  -8   12.00    6.40
  -5  -8  -8   14.60    6.90
  -5  -8  -8   12.70    7.30
  -5  -8  -8   13.10    6.50
   6   8   8    8.50   11.90
   6   8   8    3.80    8.10
   6   8   8   -3.00    8.00
   6   8   8    1.20    5.30
   6   8   8   11.60   10.40
   6   8   8    1.60    7.70
  -6  -8  -8    1.20    6.50
  -6  -8  -8    3.50    7.50
  -6  -8  -8    4.90    6.10
  -6  -8  -8   12.00    7.10
  -6  -8  -8   14.60    7.60
  -6  -8  -8    8.00    7.90
   7   8   8   39.00    8.30
   7   8   8   40.90    9.90
   7   8   8   34.00   10.80
   7   8   8   44.90   18.20
   7   8   8   41.60   13.80
   7   8   8   36.50   10.30
  -7  -8  -8   31.10    9.10
  -7  -8  -8   38.90   11.00
  -7  -8  -8   45.20    9.90
  -7  -8  -8   37.30    9.30
  -7  -8  -8   36.30    9.60
  -7  -8  -8   47.90   11.50
   8   8   8  679.93   43.20
   8   8   8  672.53   40.00
   8   8   8  656.23   49.60
   8   8   8  685.43   42.00
   8   8   8  667.13   59.19
   8   8   8  704.63   45.70
  -8  -8  -8  685.53   40.90
  -8  -8  -8  697.23   40.70
  -8  -8  -8  679.13   40.30
  -8  -8  -8  712.03   45.00
  -8  -8  -8  685.43   45.00
  -8  -8  -8  696.63   45.80
   9   8   8 1713.43  101.99
   9   8   8 1753.32   98.19
   9   8   8 1613.14   87.79
   9   8   8 1675.03   90.79
   9   8   8 1665.03   86.89
   9   8   8 1730.63  110.99
  -9  -8  -8 1690.23   93.09
  -9  -8  -8 1670.83   87.09
  -9  -8  -8 1751.12   92.19
  -9  -8  -8 1677.23   96.69
  -9  -8  -8 1650.03   87.39
  -9  -8  -8 1642.74   86.69
  10   8   8 1040.00   83.19
  10   8   8 1052.39   63.39
  10   8   8 1008.10   58.99
  10   8   8 1042.80   70.49
 -10  -8  -8 1025.30   58.69
 -10  -8  -8 1086.29   65.09
 -10  -8  -8 1019.40   59.19
 -10  -8  -8 1081.69   65.19
  11   8   8   89.59   17.80
  11   8   8   97.29   31.80
  11   8   8  113.99   25.20
 -11  -8  -8   98.39   16.70
 -11  -8  -8   88.79   21.90
 -11  -8  -8   94.19   21.70
  12   8   8  103.69   33.50
  12   8   8  133.69   22.50
  12   8   8   98.39   25.70
 -12  -8  -8  105.99   18.70
 -12  -8  -8  118.69   26.40
  13   8   8  139.29   42.10
  13   8   8  117.89   30.40
  13   8   8  131.49   24.00
 -13  -8  -8   89.99   19.00
 -13  -8  -8   59.09   26.20
   7  -9  -9   65.59   22.60
   7  -9  -9   51.99   23.90
   7  -9  -9   23.80   20.10
   6  -9  -9   26.40   19.60
   6  -9  -9   38.30   19.60
   6  -9  -9   46.30   21.20
   5  -9  -9  271.47   36.50
   5  -9  -9  332.57   39.20
   5  -9  -9  390.56   37.10
  -4   9   9   92.29   16.40
   4  -9  -9  118.19   21.90
   4  -9  -9   64.39   17.80
   4  -9  -9  107.49   19.30
  -3   9   9   63.89   15.70
   3  -9  -9   62.59   17.90
   3  -9  -9   92.69   19.70
   3  -9  -9   75.09   17.40
  -2   9   9  287.27   28.70
   2  -9  -9  276.17   28.30
   2  -9  -9  260.77   29.30
   2  -9  -9  278.67   28.90
  -1   9   9  136.19   23.10
   1  -9  -9  163.78   22.00
   1  -9  -9  126.79   17.80
   1  -9  -9  150.98   19.90
   0   9   9  -11.90    9.30
   0  -9  -9   -5.10    9.70
   0  -9  -9  -10.50    9.00
   0  -9  -9    4.30    9.20
   1   9   9    8.50    9.30
  -1  -9  -9    8.90    8.90
  -1  -9  -9    7.40    8.30
  -1  -9  -9   11.80    8.30
   2   9   9   60.89   12.50
  -2  -9  -9   65.59   12.00
  -2  -9  -9   61.99   11.80
  -2  -9  -9   72.79   11.60
   3   9   9   -1.60   13.50
   3   9   9   11.60    9.80
   3   9   9    5.10    9.00
  -3  -9  -9    2.20    7.40
  -3  -9  -9    9.20    7.60
   4   9   9 1123.89   67.89
   4   9   9 1183.88   67.49
   4   9   9 1238.48   66.59
  -4  -9  -9 1136.69   61.19
  -4  -9  -9 1206.48   66.39
  -4  -9  -9 1186.48   62.19
   5   9   9 2305.07  115.79
   5   9   9 2201.08  114.19
   5   9   9 2220.18  115.49
   5   9   9 2145.19  119.69
   5   9   9 2318.57  110.99
  -5  -9  -9 2247.58  111.59
  -5  -9  -9 2143.79  110.49
  -5  -9  -9 2430.66  110.19
  -5  -9  -9 2198.58  116.29
   6   9   9  225.98   29.40
   6   9   9  200.58   19.80
   6   9   9  216.68   17.20
   6   9   9  177.48   23.60
   6   9   9  236.48   24.50
   6   9   9  160.98   24.30
  -6  -9  -9  197.58   21.10
  -6  -9  -9  197.48   18.60
  -6  -9  -9  190.68   19.50
  -6  -9  -9  200.28   19.00
  -6  -9  -9  192.18   18.30
   7   9   9  128.99   19.00
   7   9   9  102.09   16.60
   7   9   9  121.09   20.70
   7   9   9  139.49   15.00
   7   9   9  140.39   21.90
   7   9   9  137.69   26.20
  -7  -9  -9  146.39   18.30
  -7  -9  -9  129.59   17.40
  -7  -9  -9  151.58   19.30
  -7  -9  -9  126.49   19.10
  -7  -9  -9  129.19   17.00
  -7  -9  -9  126.89   18.60
   8   9   9  756.72   49.20
   8   9   9  722.73   46.50
   8   9   9  777.72   53.49
   8   9   9  767.22   43.30
   8   9   9  768.32   46.50
   8   9   9  804.82   62.69
  -8  -9  -9  731.83   49.60
  -8  -9  -9  703.93   48.30
  -8  -9  -9  757.02   44.20
  -8  -9  -9  737.43   46.90
  -8  -9  -9  747.33   44.20
  -8  -9  -9  766.42   44.20
   9   9   9  167.38   33.60
   9   9   9  132.29   18.20
   9   9   9  131.79   17.40
   9   9   9  118.29   19.20
   9   9   9  108.19   16.30
   9   9   9  126.99   23.60
  -9  -9  -9  109.99   19.50
  -9  -9  -9  134.49   19.00
  -9  -9  -9  111.09   15.50
  -9  -9  -9  141.09   18.70
  -9  -9  -9  157.38   24.80
  -9  -9  -9  132.59   21.30
  10   9   9  197.98   24.60
  10   9   9  123.49   25.80
  10   9   9  132.79   21.70
  10   9   9  133.09   33.50
 -10  -9  -9  202.18   27.70
 -10  -9  -9  153.38   23.50
 -10  -9  -9  166.38   21.50
 -10  -9  -9  170.98   20.90
  11   9   9  148.59   35.40
  11   9   9  124.39   19.90
  11   9   9   98.49   25.00
 -11  -9  -9  100.29   22.00
 -11  -9  -9  114.39   17.10
 -11  -9  -9  107.19   17.50
 -11  -9  -9  102.99   22.00
  12   9   9   25.60   19.90
  12   9   9    9.70   24.70
  12   9   9   22.10   13.60
 -12  -9  -9    8.30   18.90
 -12  -9  -9    8.30   11.30
 -12  -9  -9   15.90   12.80
  13   9   9   29.00   31.20
  13   9   9   38.80   22.30
 -13  -9  -9  -10.30   22.10
 -13  -9  -9   10.10   11.90
   6 -10 -10    2.90   18.90
   6 -10 -10   -3.20   19.40
   6 -10 -10  -11.60   17.80
   5 -10 -10   -6.50   18.20
   5 -10 -10    0.80   17.70
   5 -10 -10   -5.70   16.20
  -4  10  10  -11.80   12.20
   4 -10 -10  -14.90   15.70
   4 -10 -10  -16.60   14.60
   4 -10 -10  -14.00   15.90
  -3  10  10    6.50   12.80
   3 -10 -10  -14.70   14.10
   3 -10 -10   16.00   16.30
   3 -10 -10   14.80   15.80
  -2  10  10   24.30   13.50
   2 -10 -10   23.30   14.30
   2 -10 -10   41.30   14.40
   2 -10 -10    5.00   13.00
  -1  10  10   -1.40   12.40
   1 -10 -10    6.80   12.60
   1 -10 -10    4.90   11.90
   1 -10 -10    3.80   12.60
   0  10  10   58.09   15.60
   0 -10 -10   78.39   16.10
   0 -10 -10   59.49   14.20
   0 -10 -10   92.49   16.80
   1  10  10   26.00   13.00
  -1 -10 -10   43.80   11.90
  -1 -10 -10   24.70   11.20
  -1 -10 -10   44.60   13.50
   2  10  10  812.22   52.89
  -2 -10 -10  897.61   49.70
  -2 -10 -10  864.91   49.60
  -2 -10 -10  827.72   51.79
   3  10  10 1855.31   97.19
  -3 -10 -10 1764.12   96.09
  -3 -10 -10 1854.41   93.29
  -3 -10 -10 1760.12   92.19
   4  10  10  458.75   40.60
   4  10  10  441.46   35.90
  -4 -10 -10  447.36   30.50
  -4 -10 -10  471.65   34.50
   5  10  10  447.56   36.00
   5  10  10  471.95   38.90
  -5 -10 -10  505.55   35.30
  -5 -10 -10  433.16   30.30
  -5 -10 -10  426.76   30.40
   6  10  10  272.27   20.80
   6  10  10  276.87   28.10
   6  10  10  292.37   30.60
   6  10  10  276.47   34.50
  -6 -10 -10  273.07   23.10
  -6 -10 -10  263.87   26.40
  -6 -10 -10  245.98   21.40
  -6 -10 -10  271.27   23.10
   7  10  10  114.89   18.10
   7  10  10  123.89   18.20
   7  10  10  147.69   19.30
   7  10  10  139.39   15.60
   7  10  10  150.08   27.00
  -7 -10 -10  143.79   19.10
  -7 -10 -10  148.49   18.20
  -7 -10 -10  131.39   19.20
  -7 -10 -10  132.29   20.40
  -7 -10 -10  136.29   20.80
   8  10  10   13.80   11.80
   8  10  10    1.50   14.80
   8  10  10    9.60   11.70
   8  10  10  -13.20   10.30
   8  10  10    6.40    6.70
   8  10  10    4.90   15.90
  -8 -10 -10    5.10    8.40
  -8 -10 -10   -7.00    9.50
  -8 -10 -10   16.80   11.40
  -8 -10 -10   -6.60    9.70
  -8 -10 -10   -1.10   10.20
  -8 -10 -10   -6.40    7.90
   9  10  10    2.80   12.90
   9  10  10   11.10   10.30
   9  10  10   16.70   14.80
   9  10  10    1.60   10.40
  -9 -10 -10   11.30    9.60
  -9 -10 -10    5.80   12.00
  -9 -10 -10   10.30   10.00
  -9 -10 -10    4.50    9.10
  -9 -10 -10    7.30   10.40
  -9 -10 -10   17.60   12.70
  10  10  10   56.69   25.20
  10  10  10   45.80   14.00
  10  10  10   71.59   21.40
 -10 -10 -10   66.09   14.80
 -10 -10 -10   85.19   18.30
 -10 -10 -10   57.29   14.50
  11  10  10   22.50   19.30
  11  10  10   20.50   22.60
 -11 -10 -10   -6.70   12.10
 -11 -10 -10    7.10   16.20
 -11 -10 -10   -2.40    9.60
  12  10  10   45.50   26.70
  12  10  10   52.89   21.60
 -12 -10 -10   26.30   19.40
 -12 -10 -10   28.90   14.20
   5 -11 -11  -22.20   18.10
   5 -11 -11  -36.80   20.20
  -4  11  11  -17.80   16.00
   4 -11 -11  -33.00   16.40
   4 -11 -11   -5.30   18.90
   4 -11 -11  -11.80   16.40
  -3  11  11   44.50   16.90
   3 -11 -11   34.80   18.40
   3 -11 -11   90.89   21.80
   3 -11 -11   81.39   23.60
  -2  11  11  589.54   45.60
   2 -11 -11  711.83   47.40
   2 -11 -11  508.15   45.30
   2 -11 -11  713.53   51.59
  -1  11  11  481.85   40.40
   1 -11 -11  541.35   40.50
   1 -11 -11  485.55   44.20
   0  11  11   17.90   14.60
   0 -11 -11   31.90   21.30
   0 -11 -11   13.20   13.40
   0 -11 -11   27.40   15.20
   1  11  11  639.54   44.50
  -1 -11 -11  467.55   40.30
  -1 -11 -11  669.93   41.90
   2  11  11 1505.05   80.99
  -2 -11 -11 1440.96   76.89
  -2 -11 -11 1262.57   78.19
   3  11  11  393.26   35.70
  -3 -11 -11  334.07   31.50
  -3 -11 -11  372.36   29.70
   4  11  11   46.80   14.30
  -4 -11 -11   32.30   10.50
  -4 -11 -11   44.50   12.00
   5  11  11   60.09   15.30
   5  11  11   62.99   19.20
  -5 -11 -11   90.19   14.20
  -5 -11 -11   68.59   14.30
   6  11  11   66.19   14.60
   6  11  11   63.29   18.00
  -6 -11 -11   58.99   13.20
  -6 -11 -11   62.89   11.20
   7  11  11   25.20   15.00
   7  11  11   59.59   11.10
   7  11  11   36.10   14.30
  -7 -11 -11   64.49   12.70
  -7 -11 -11   50.49   13.10
  -7 -11 -11   53.99   16.00
   8  11  11   16.20   13.90
   8  11  11   20.10   13.70
   8  11  11   26.10    8.00
  -8 -11 -11   23.50    9.90
  -8 -11 -11   27.40   12.50
  -8 -11 -11   30.70   10.80
   9  11  11   -6.90   14.10
   9  11  11   -7.50   12.50
  -9 -11 -11   -0.90   12.50
  -9 -11 -11   16.10   12.10
  -9 -11 -11    0.50    8.20
  10  11  11   66.19   16.60
  10  11  11  139.89   34.30
 -10 -11 -11   98.49   17.40
 -10 -11 -11  103.89   19.70
  11  11  11  212.88   41.00
 -11 -11 -11  153.28   27.50
 -11 -11 -11  233.38   31.30
  12  11  11   49.60   29.80
  12  11  11   46.60   26.30
 -12 -11 -11    7.90   17.00
   4 -12 -12  130.59   27.20
   4 -12 -12   68.39   23.80
  -3  12  12  178.38   31.50
   3 -12 -12  169.28   27.40
  -2  12  12   20.90   16.30
   2 -12 -12  -11.90   15.10
   2 -12 -12   39.80   17.80
  -1  12  12   56.89   18.60
   1 -12 -12   88.89   20.10
   1 -12 -12   46.00   17.90
   0  12  12  310.37   35.40
   0 -12 -12  325.67   33.50
   1  12  12  125.39   21.10
  -1 -12 -12   83.79   18.50
  -1 -12 -12  147.19   21.60
   2  12  12    0.80   14.30
  -2 -12 -12    5.70   12.70
  -2 -12 -12  -11.10   11.20
   3  12  12   51.09   17.10
  -3 -12 -12   47.30   14.60
  -3 -12 -12   52.89   14.30
   4  12  12  111.19   19.50
  -4 -12 -12   84.49   15.90
  -4 -12 -12   98.99   15.60
   5  12  12  163.38   26.50
   5  12  12  177.58   29.10
  -5 -12 -12  173.08   21.60
  -5 -12 -12  170.28   25.00
   6  12  12  366.56   35.10
   6  12  12  318.87   39.80
  -6 -12 -12  344.57   32.50
  -6 -12 -12  331.37   27.70
   7  12  12  221.48   34.70
   7  12  12  230.88   32.20
  -7 -12 -12  259.77   28.50
  -7 -12 -12  250.87   31.00
  -7 -12 -12  229.68   24.00
   8  12  12   24.50    8.80
   8  12  12   15.10   15.70
   8  12  12  -10.80   14.90
  -8 -12 -12    8.50   10.50
  -8 -12 -12    2.90   10.10
  -8 -12 -12   18.20   14.00
   9  12  12  305.07   38.20
   9  12  12  249.97   34.10
  -9 -12 -12  303.17   35.70
  -9 -12 -12  267.37   30.50
  10  12  12  199.58   31.90
 -10 -12 -12  241.18   29.00
  -2  13  13  -22.70   16.00
   2 -13 -13   -7.70   17.90
  -1  13  13   -6.20   16.70
   1 -13 -13  -27.90   15.50
   1 -13 -13    2.90   17.20
   0  13  13  -15.50   15.60
   0 -13 -13  -15.90   13.90
   0 -13 -13   -6.70   15.10
   1  13  13   71.69   19.30
  -1 -13 -13   26.40   15.70
  -1 -13 -13   57.09   18.00
   2  13  13  330.27   38.30
  -2 -13 -13  350.26   33.60
   3  13  13  276.87   36.10
  -3 -13 -13  182.88   29.60
  -3 -13 -13  329.77   30.70
   4  13  13    4.80   15.90
  -4 -13 -13    7.10   12.60
  -4 -13 -13    7.20   12.10
   5  13  13   14.80   15.90
  -5 -13 -13   15.30   13.40
  -5 -13 -13   33.00   13.70
   6  13  13  -16.20   19.90
   6  13  13   -5.20   14.60
  -6 -13 -13    7.30   11.00
  -6 -13 -13   -2.50   11.70
   7  13  13  263.27   41.80
   7  13  13  371.96   39.80
  -7 -13 -13  332.87   34.50
  -7 -13 -13  351.06   29.30
  -7 -13 -13  358.36   37.80
   8  13  13  663.83   56.19
   8  13  13  762.32   56.09
  -8 -13 -13  740.73   52.29
  -8 -13 -13  706.93   54.29
  -8 -13 -13  707.73   47.00
   9  13  13  114.59   24.80
   9  13  13  102.29   23.60
  -9 -13 -13  104.69   23.40
  -9 -13 -13  109.29   20.00
  10  13  13  -27.00   16.10
 -10 -13 -13  -10.40   28.50
 -10 -13 -13   -1.40   11.30
   0  14  14   49.99   21.30
   0 -14 -14   19.90   18.70
   0 -14 -14   67.19   20.20
   1  14  14   14.10   18.70
  -1 -14 -14   -5.70   14.60
  -1 -14 -14   27.20   17.70
   2  14  14  104.39   24.20
  -2 -14 -14  128.79   22.90
  -2 -14 -14   67.79   20.00
   3  14  14  492.15   47.10
  -3 -14 -14  465.55   40.00
   4  14  14  212.68   36.60
  -4 -14 -14  170.48   26.30
  -4 -14 -14  237.98   29.10
   5  14  14  -13.00   16.50
  -5 -14 -14   -4.60   12.40
  -5 -14 -14   17.50   13.60
   6  14  14  132.79   24.10
  -6 -14 -14  125.19   24.80
  -6 -14 -14  129.79   19.90
  -6 -14 -14  107.99   20.60
   7  14  14   54.89   27.10
   7  14  14  125.39   24.20
  -7 -14 -14  141.49   20.30
  -7 -14 -14  104.79   21.10
  -7 -14 -14  150.68   26.10
   8  14  14  -20.30   17.70
   8  14  14  -48.50   20.30
  -8 -14 -14    8.10   15.80
  -8 -14 -14  -12.60   11.90
   9  14  14   14.00   20.00
   9  14  14  -26.60   20.20
  -9 -14 -14   25.60   15.20
  -9 -14 -14    6.40   16.30
   2  15  15   12.30   21.10
   3  15  15   45.30   22.70
  -3 -15 -15   10.80   18.00
  -3 -15 -15   43.90   18.90
   4  15  15   24.20   21.30
  -4 -15 -15   17.60   17.30
  -4 -15 -15   11.20   16.90
   5  15  15   -1.30   18.90
  -5 -15 -15   -5.00   14.80
  -5 -15 -15  -20.50   13.40
   6  15  15  -21.10   18.80
  -6 -15 -15  -20.20   14.40
  -6 -15 -15    8.00   14.00
  -6 -15 -15    2.60   17.00
   7  15  15   24.60   21.10
  -7 -15 -15   10.00   14.90
   5  15  16   -6.20   19.60
   4  15  16  120.09   27.10
  -8 -14 -15   95.39   19.90
   8  14  15  124.19   24.70
   8  14  15   68.79   25.30
  -7 -14 -15  286.67   37.00
  -7 -14 -15  194.08   32.10
   7  14  15  247.78   38.40
  -6 -14 -15    7.70   12.50
  -6 -14 -15   -5.30   13.60
   6  14  15   -9.10   16.00
  -5 -14 -15    7.70   13.40
  -5 -14 -15  -15.20   13.10
   5  14  15  -22.90   16.50
  -4 -14 -15  -18.10   12.60
  -4 -14 -15   16.70   15.40
   4  14  15   -3.60   17.70
  -3 -14 -15   27.10   16.20
  -3 -14 -15  -11.00   14.40
   3  14  15   24.70   19.20
  -2 -14 -15  -22.40   14.40
  -2 -14 -15    5.90   15.80
   2  14  15   -5.90   17.80
  -1 -14 -15    5.30   16.90
  -1 -14 -15  -27.10   15.70
   1  14  15  -15.30   17.20
   0 -14 -15    5.00   17.50
   0 -14 -15  -19.20   15.80
   0  14  15   -6.90   18.20
 -10 -13 -14  147.49   22.90
  10  13  14   85.49   22.00
  -9 -13 -14  243.58   32.10
  -9 -13 -14  235.18   33.80
   9  13  14  224.68   37.50
   9  13  14  158.18   27.40
  -8 -13 -14   77.59   19.20
  -8 -13 -14   63.39   17.00
   8  13  14   69.99   19.90
   8  13  14   40.00   21.70
  -7 -13 -14    6.90   14.70
  -7 -13 -14   -2.40   10.80
  -7 -13 -14   -6.40   11.10
   7  13  14  -20.60   17.40
   7  13  14   -7.60   14.40
  -6 -13 -14   11.10   12.40
  -6 -13 -14   23.60   12.60
   6  13  14    6.50   14.80
   6  13  14   -6.70   20.40
  -5 -13 -14  -11.30   10.30
  -5 -13 -14   -2.50   10.90
   5  13  14    2.60   15.00
  -4 -13 -14  290.67   29.00
  -4 -13 -14  220.98   30.10
   4  13  14  283.27   36.30
  -3 -13 -14  843.12   61.69
  -3 -13 -14 1014.50   60.19
   3  13  14 1033.30   65.59
  -2 -13 -14  184.28   26.90
  -2 -13 -14  276.97   30.60
   2  13  14  242.78   34.60
  -1 -13 -14   25.00   15.40
  -1 -13 -14   -0.10   13.40
   1  13  14   34.00   17.90
   0 -13 -14  482.55   39.60
   0 -13 -14  305.87   37.10
   0  13  14  386.46   40.70
   1 -13 -14   68.79   21.40
   1 -13 -14   63.69   20.30
  -1  13  14   70.19   21.50
   2 -13 -14  -29.50   16.10
   2 -13 -14  -24.00   17.30
  -2  13  14   15.40   18.00
 -11 -12 -13   -3.80    9.80
  11  12  13  -27.50   13.90
 -10 -12 -13    4.80   10.80
  10  12  13  -13.70   13.80
  -9 -12 -13    7.90   14.30
  -9 -12 -13   15.30   11.70
   9  12  13    2.90   15.70
   9  12  13    5.20   15.60
  -8 -12 -13  285.07   30.20
  -8 -12 -13  254.37   32.00
   8  12  13  226.98   33.10
   8  12  13  240.58   33.40
  -7 -12 -13  398.76   29.90
  -7 -12 -13  368.76   36.30
  -7 -12 -13  403.66   35.50
   7  12  13  340.87   38.40
   7  12  13  377.36   36.60
  -6 -12 -13   56.89   13.20
  -6 -12 -13   41.00   14.10
   6  12  13   46.20   15.40
   6  12  13   44.90   19.00
  -5 -12 -13  161.38   24.30
  -5 -12 -13  126.09   17.70
   5  12  13  120.69   24.40
   5  12  13  156.58   27.90
  -4 -12 -13  265.57   29.00
  -4 -12 -13  242.58   25.40
   4  12  13  256.37   32.40
  -3 -12 -13   22.90   12.30
  -3 -12 -13   26.70   12.80
   3  12  13   34.70   15.40
  -2 -12 -13  500.85   37.80
  -2 -12 -13  368.86   36.80
   2  12  13  539.95   42.40
  -1 -12 -13  481.95   38.50
   1  12  13  443.56   40.90
   0 -12 -13  -18.50   12.50
   0 -12 -13   -0.70   14.30
   0  12  13   -2.80   14.70
   1 -12 -13  121.49   22.70
   1 -12 -13   68.09   18.50
  -1  12  13   74.69   19.60
   2 -12 -13   87.89   21.60
   2 -12 -13   23.80   17.90
  -2  12  13   48.30   18.30
   3 -12 -13   59.39   21.90
   3 -12 -13  -12.30   18.10
  -3  12  13   36.10   18.10
   4 -12 -13   91.59   25.50
  -4  12  13   59.69   24.50
 -11 -11 -12   -9.90    8.80
 -11 -11 -12   15.40   14.70
  11  11  12   36.20   23.10
  11  11  12  -11.00   11.70
 -10 -11 -12  164.68   25.80
 -10 -11 -12  233.78   27.60
  10  11  12  143.29   21.50
  10  11  12  162.58   36.50
  -9 -11 -12  274.67   29.30
  -9 -11 -12  301.37   28.70
  -9 -11 -12  266.77   31.50
   9  11  12  211.48   29.50
   9  11  12  266.57   32.60
   9  11  12  363.86   57.29
  -8 -11 -12    2.50    8.00
  -8 -11 -12    4.20   10.90
  -8 -11 -12   26.40   12.30
   8  11  12  -10.60   11.60
   8  11  12  -21.80   11.10
  -7 -11 -12  328.57   31.90
  -7 -11 -12  324.67   30.30
  -7 -11 -12  298.27   24.90
   7  11  12  302.17   32.70
   7  11  12  264.47   30.30
  -6 -11 -12  885.41   56.19
  -6 -11 -12  857.81   49.99
   6  11  12  881.01   55.59
   6  11  12  851.81   57.19
  -5 -11 -12   51.09   12.10
  -5 -11 -12   44.30   13.00
   5  11  12   29.20   13.60
   5  11  12   41.10   16.90
  -4 -11 -12  124.69   16.90
  -4 -11 -12  163.78   22.60
   4  11  12  121.09   22.50
   4  11  12  122.79   19.00
  -3 -11 -12  201.58   23.80
  -3 -11 -12  235.28   26.00
   3  11  12  205.78   29.10
  -2 -11 -12   33.30   13.00
  -2 -11 -12   19.80   12.50
   2  11  12   13.60   13.90
  -1 -11 -12    8.00   12.70
  -1 -11 -12   -2.90   11.60
   1  11  12   -9.00   12.70
   0 -11 -12   75.49   16.60
   0 -11 -12  105.39   19.00
   0  11  12   93.99   18.40
   1 -11 -12  121.89   19.20
   1 -11 -12   83.89   18.00
  -1  11  12  106.39   19.00
   2 -11 -12    3.30   14.10
   2 -11 -12  -17.20   14.10
  -2  11  12    1.20   14.10
   3 -11 -12  490.15   40.80
   3 -11 -12  313.57   38.30
  -3  11  12  407.86   37.40
   4 -11 -12  288.97   36.10
   4 -11 -12  146.39   26.50
  -4  11  12  172.88   29.60
   5 -11 -12   -5.90   19.10
   5 -11 -12  -15.00   19.00
 -12 -10 -11   32.40   18.60
 -12 -10 -11   33.60   13.50
  12  10  11   86.69   30.60
  12  10  11   51.19   21.50
 -11 -10 -11  336.17   30.10
 -11 -10 -11  333.47   35.90
 -11 -10 -11  358.26   35.50
  11  10  11  354.56   42.10
  11  10  11  310.17   31.70
  11  10  11  402.06   55.19
 -10 -10 -11  146.39   24.90
 -10 -10 -11   92.99   18.20
 -10 -10 -11  133.19   17.90
  10  10  11   77.69   16.00
  10  10  11   88.09   27.20
  10  10  11  136.89   24.80
  -9 -10 -11   29.70   11.00
  -9 -10 -11    8.90   11.70
  -9 -10 -11   24.60   12.40
  -9 -10 -11   16.90   10.10
   9  10  11   29.00   19.60
   9  10  11   12.20   13.30
   9  10  11   35.90   19.20
   9  10  11    7.50   11.10
  -8 -10 -11  226.28   26.70
  -8 -10 -11  254.67   23.70
  -8 -10 -11  231.28   22.00
  -8 -10 -11  211.28   25.50
   8  10  11  189.58   25.80
   8  10  11  221.88   27.40
   8  10  11  263.07   39.80
   8  10  11  227.78   24.50
  -7 -10 -11   -6.70   10.70
  -7 -10 -11    2.20    7.80
  -7 -10 -11   16.00    9.10
  -7 -10 -11    0.10    8.00
   7  10  11    3.30    6.70
   7  10  11    1.50   10.50
   7  10  11    4.00   14.70
   7  10  11   -8.40   10.70
  -6 -10 -11  291.57   23.80
  -6 -10 -11  310.87   28.20
   6  10  11  291.57   34.50
   6  10  11  316.27   31.00
   6  10  11  317.07   29.90
  -5 -10 -11  232.78   25.50
  -5 -10 -11  213.08   21.10
   5  10  11  242.38   30.10
   5  10  11  249.58   27.00
  -4 -10 -11   38.70   10.80
  -4 -10 -11   51.19   10.60
   4  10  11   23.80   14.40
   4  10  11   53.19   13.00
  -3 -10 -11  248.88   23.60
  -3 -10 -11  232.98   25.20
   3  10  11  254.07   33.40
   3  10  11  259.87   28.20
  -2 -10 -11  708.83   42.20
  -2 -10 -11  595.24   43.00
   2  10  11  677.23   45.30
  -1 -10 -11  663.43   41.70
  -1 -10 -11  575.64   41.80
   1  10  11  633.24   43.90
   0 -10 -11  -13.60   11.40
   0 -10 -11   -9.00   13.30
   0 -10 -11    7.70   10.40
   0  10  11   -9.00   11.50
   1 -10 -11  682.93   45.00
   1 -10 -11  633.04   46.00
   1 -10 -11  602.94   44.20
  -1  10  11  673.13   46.20
   2 -10 -11  540.85   39.90
   2 -10 -11  538.85   41.10
   2 -10 -11  461.15   38.70
  -2  10  11  474.25   39.10
   3 -10 -11  177.78   25.60
   3 -10 -11  109.09   21.70
   3 -10 -11  144.49   23.40
  -3  10  11  151.18   25.10
   4 -10 -11   16.90   16.70
   4 -10 -11   38.80   17.70
   4 -10 -11   21.70   17.80
  -4  10  11   32.30   14.80
   5 -10 -11   20.80   19.60
   5 -10 -11    2.40   18.00
   5 -10 -11   16.60   19.60
   6 -10 -11  -31.60   17.30
   6 -10 -11  -16.20   19.20
   6 -10 -11  -14.60   18.00
 -12  -9 -10   66.39   22.00
 -12  -9 -10   65.59   15.70
  12   9  10   71.19   23.50
  12   9  10   80.29   31.40
 -11  -9 -10   69.99   19.10
 -11  -9 -10   66.29   15.20
 -11  -9 -10   56.09   15.30
  11   9  10   46.90   13.50
  11   9  10  108.59   33.10
  11   9  10   59.99   21.70
 -10  -9 -10  115.49   16.70
 -10  -9 -10   96.89   18.40
 -10  -9 -10   98.79   18.00
 -10  -9 -10  107.39   19.40
  10   9  10   65.19   14.80
  10   9  10   85.79   22.00
  10   9  10   77.99   27.90
  -9  -9 -10  257.57   23.00
  -9  -9 -10  250.27   23.20
  -9  -9 -10  265.07   27.80
  -9  -9 -10  230.98   26.80
   9   9  10  194.28   24.50
   9   9  10  249.68   41.80
   9   9  10  223.98   31.30
   9   9  10  271.27   33.50
  -8  -9 -10  253.87   21.90
  -8  -9 -10  237.88   25.70
  -8  -9 -10  208.58   25.90
  -8  -9 -10  211.78   21.00
  -8  -9 -10  237.68   24.30
  -8  -9 -10  218.68   21.60
   8   9  10  224.08   24.30
   8   9  10  220.38   19.30
   8   9  10  263.97   24.60
   8   9  10  223.08   38.20
   8   9  10  196.88   27.00
   8   9  10  228.58   26.00
  -7  -9 -10  554.64   33.80
  -7  -9 -10  527.65   39.70
  -7  -9 -10  542.75   34.00
  -7  -9 -10  545.15   39.10
  -7  -9 -10  541.75   35.10
  -7  -9 -10  573.94   34.70
   7   9  10  574.24   49.70
   7   9  10  573.84   42.20
   7   9  10  500.15   38.10
   7   9  10  566.44   35.60
   7   9  10  541.55   37.80
   7   9  10  560.84   32.80
  -6  -9 -10  724.43   41.50
  -6  -9 -10  710.43   41.70
  -6  -9 -10  742.83   40.90
  -6  -9 -10  747.83   47.30
   6   9  10  732.63   40.60
   6   9  10  746.63   54.29
   6   9  10  763.62   46.90
   6   9  10  741.73   48.20
   6   9  10  682.93   45.70
  -5  -9 -10  175.18   20.40
  -5  -9 -10  164.28   17.60
   5   9  10  150.98   24.60
   5   9  10  168.38   22.40
   5   9  10  191.98   23.90
  -4  -9 -10  396.16   30.70
  -4  -9 -10  385.46   26.40
   4   9  10  404.36   33.50
   4   9  10  381.96   31.00
   4   9  10  378.66   32.80
  -3  -9 -10 1518.85   82.99
  -3  -9 -10 1556.94   79.49
   3   9  10 1510.35   84.19
   3   9  10 1594.64   82.99
   3   9  10 1496.25   83.79
  -2  -9 -10  745.93   43.10
  -2  -9 -10  741.83   45.80
   2   9  10  739.33   46.60
  -1  -9 -10   26.20    9.60
  -1  -9 -10   22.80    8.80
  -1  -9 -10   18.30    9.90
   1   9  10   20.20   10.40
   0  -9 -10  432.56   32.00
   0  -9 -10  456.55   32.30
   0  -9 -10  414.86   31.10
   0   9  10  402.06   32.80
   1  -9 -10   34.00   11.90
   1  -9 -10   29.90   12.90
   1  -9 -10   21.30   13.30
  -1   9  10   29.30   12.50
   2  -9 -10  262.77   28.80
   2  -9 -10  278.67   27.70
   2  -9 -10  211.88   27.10
  -2   9  10  252.57   28.20
   3  -9 -10  194.38   28.10
   3  -9 -10  121.99   20.20
   3  -9 -10  213.78   27.50
  -3   9  10  175.48   24.80
   4  -9 -10   -3.80   14.60
   4  -9 -10   -6.00   14.30
   4  -9 -10   12.40   16.00
  -4   9  10    6.00   12.20
   5  -9 -10  -11.10   15.70
   5  -9 -10   -0.80   15.40
   5  -9 -10  -26.80   14.70
  -5   9  10   -3.40   15.20
   6  -9 -10    2.60   17.90
   6  -9 -10  -23.30   17.00
   6  -9 -10  -16.30   16.40
   7  -9 -10  -32.70   17.10
   7  -9 -10  -21.40   18.70
   7  -9 -10    1.40   19.90
 -13  -8  -9   34.50   24.90
  13   8   9   46.10   18.60
  13   8   9   36.60   31.40
 -12  -8  -9    4.30   19.40
 -12  -8  -9    6.60   11.50
  12   8   9   19.10   12.80
  12   8   9   31.50   27.90
  12   8   9   -9.10   16.70
 -11  -8  -9   11.20   10.20
 -11  -8  -9   23.50   11.60
 -11  -8  -9   27.30   17.50
  11   8   9   42.60   25.00
  11   8   9    7.70   11.80
  11   8   9   -7.00    9.10
  11   8   9   14.90   17.00
 -10  -8  -9   28.70   16.00
 -10  -8  -9   10.50    8.50
 -10  -8  -9   12.10   10.30
 -10  -8  -9   20.60   10.40
  10   8   9    7.70    9.60
  10   8   9   26.60   17.10
  10   8   9   38.50   23.00
  10   8   9   39.70   11.50
  -9  -8  -9    6.30    9.90
  -9  -8  -9   21.00   14.10
  -9  -8  -9   14.00    9.80
  -9  -8  -9   11.90    8.60
   9   8   9   25.10   20.60
   9   8   9   12.40   16.20
   9   8   9   16.10    9.70
   9   8   9   22.80   11.30
  -8  -8  -9  272.97   26.20
  -8  -8  -9  253.47   25.60
  -8  -8  -9  229.98   25.90
  -8  -8  -9  258.17   22.20
  -8  -8  -9  237.18   22.20
  -8  -8  -9  250.37   21.10
   8   8   9  233.98   31.10
   8   8   9  261.57   24.00
   8   8   9  249.97   20.10
   8   8   9  254.37   24.30
   8   8   9  259.77   26.10
   8   8   9  262.77   40.50
  -7  -8  -9  286.87   22.40
  -7  -8  -9  300.77   26.40
  -7  -8  -9  301.87   22.80
  -7  -8  -9  296.67   26.50
  -7  -8  -9  325.97   22.70
  -7  -8  -9  320.07   24.90
   7   8   9  276.47   35.60
   7   8   9  306.07   30.00
   7   8   9  282.47   24.70
   7   8   9  273.47   25.90
   7   8   9  314.27   25.30
   7   8   9  303.37   21.30
  -6  -8  -9  315.27   26.40
  -6  -8  -9  315.97   22.70
  -6  -8  -9  304.07   23.10
  -6  -8  -9  333.77   22.20
   6   8   9  279.17   26.00
   6   8   9  314.47   24.50
   6   8   9  354.46   29.00
   6   8   9  364.76   34.80
   6   8   9  328.77   26.00
   6   8   9  331.07   21.60
  -5  -8  -9 2034.40  106.59
  -5  -8  -9 2010.30  100.99
  -5  -8  -9 2088.99   99.59
   5   8   9 1997.30  104.49
   5   8   9 2087.29  104.59
   5   8   9 2039.20  100.29
   5   8   9 2140.29  112.09
   5   8   9 1919.91  103.99
  -4  -8  -9 1152.28   65.89
  -4  -8  -9 1182.38   61.59
   4   8   9 1171.08   64.69
   4   8   9 1190.88   65.09
   4   8   9 1232.48   69.49
  -3  -8  -9    5.70    6.40
  -3  -8  -9    1.80    6.20
   3   8   9   11.30   10.00
   3   8   9    7.60    7.50
   3   8   9   12.70    8.40
  -2  -8  -9  284.07   21.20
  -2  -8  -9  281.37   22.90
   2   8   9  270.07   27.50
   2   8   9  294.37   24.30
   2   8   9  249.28   22.20
  -1  -8  -9  255.77   20.20
  -1  -8  -9  230.78   20.60
   1   8   9  176.58   18.30
   1   8   9  250.97   22.30
   0  -8  -9    3.10    7.20
   0  -8  -9   -6.40    7.70
   0  -8  -9   -9.60    7.50
   0   8   9   -0.50    5.00
   0   8   9   -1.00    7.60
   1  -8  -9   33.00   10.80
   1  -8  -9   22.20   11.40
   1  -8  -9   26.50   11.30
  -1   8   9   18.50   10.80
   2  -8  -9   44.90   13.40
   2  -8  -9   39.50   12.40
   2  -8  -9   43.70   12.10
  -2   8   9   45.80   12.70
   3  -8  -9   19.00   12.70
   3  -8  -9   26.10   13.20
   3  -8  -9   11.50   13.20
  -3   8   9   12.10   12.00
   4  -8  -9   95.49   18.60
   4  -8  -9   82.19   17.30
   4  -8  -9   89.59   17.20
  -4   8   9   99.19   16.30
   5  -8  -9  193.78   29.70
   5  -8  -9  279.67   30.80
   5  -8  -9  169.08   26.10
  -5   8   9  197.68   26.00
   6  -8  -9   48.70   19.20
   6  -8  -9   25.70   18.30
   6  -8  -9   23.70   18.20
   7  -8  -9  158.28   25.80
   7  -8  -9  109.29   25.50
   7  -8  -9   87.59   22.70
   8  -8  -9  450.15   45.80
   8  -8  -9  429.56   49.10
   8  -8  -9  321.87   41.80
 -13  -7  -8   14.80   14.50
 -13  -7  -8    9.50   23.80
  13   7   8   33.50   16.80
  13   7   8   20.40   22.10
  13   7   8   30.30   32.30
 -12  -7  -8   30.40   22.30
 -12  -7  -8   32.30   13.60
  12   7   8   41.50   22.20
  12   7   8   41.50   15.60
  12   7   8   26.30   27.20
 -11  -7  -8  153.18   21.70
 -11  -7  -8  124.39   24.50
  11   7   8  142.29   37.00
  11   7   8  129.09   21.10
  11   7   8  113.59   25.20
  11   7   8  116.59   17.50
 -10  -7  -8 1362.26   81.29
 -10  -7  -8 1397.96   76.39
  10   7   8 1425.46   81.49
  10   7   8 1407.36   88.09
  10   7   8 1439.26   76.59
  10   7   8 1489.55  103.49
  -9  -7  -8 1490.25   78.39
  -9  -7  -8 1516.75   82.69
   9   7   8 1378.86   81.89
   9   7   8 1522.45   78.79
   9   7   8 1493.35  101.29
   9   7   8 1498.55   88.79
  -8  -7  -8  545.85   33.50
  -8  -7  -8  521.45   32.10
  -8  -7  -8  526.35   38.00
  -8  -7  -8  558.94   37.30
  -8  -7  -8  547.55   36.80
   8   7   8  543.25   36.50
   8   7   8  536.15   34.20
   8   7   8  473.95   49.50
   8   7   8  499.65   31.60
   8   7   8  488.85   41.30
   8   7   8  515.65   36.00
  -7  -7  -8  199.08   18.20
  -7  -7  -8  221.58   18.20
  -7  -7  -8  219.98   20.70
  -7  -7  -8  222.28   21.50
  -7  -7  -8  227.58   21.20
  -7  -7  -8  230.68   18.30
   7   7   8  242.78   33.10
   7   7   8  232.18   20.10
   7   7   8  219.38   17.30
   7   7   8  207.98   20.10
   7   7   8  192.48   20.70
   7   7   8  234.88   25.80
  -6  -7  -8  814.92   44.10
  -6  -7  -8  812.82   44.10
  -6  -7  -8  826.02   44.40
  -6  -7  -8  816.92   49.50
   6   7   8  810.72   50.49
   6   7   8  840.92   46.60
   6   7   8  829.62   44.00
   6   7   8  864.51   58.09
   6   7   8  840.82   46.00
   6   7   8  784.02   46.70
  -5  -7  -8  331.37   21.50
  -5  -7  -8  327.77   21.70
  -5  -7  -8  336.67   21.10
  -5  -7  -8  327.17   25.50
   5   7   8  319.17   24.80
   5   7   8  326.47   24.30
   5   7   8  332.87   20.90
   5   7   8  321.27   26.40
   5   7   8  343.17   22.80
   5   7   8  367.76   32.20
  -4  -7  -8  162.18   16.40
  -4  -7  -8  167.88   13.00
  -4  -7  -8  160.68   14.40
   4   7   8  167.28   17.30
   4   7   8  127.99   16.90
   4   7   8  161.08   17.60
   4   7   8  176.18   13.30
   4   7   8  182.38   20.90
  -3  -7  -8   26.30    6.50
  -3  -7  -8   35.10    6.80
   3   7   8   43.40    8.80
   3   7   8   26.30    8.20
   3   7   8   45.50    8.70
  -2  -7  -8  136.59   13.90
  -2  -7  -8  131.59   14.90
   2   7   8  122.19   16.20
   2   7   8  142.49   15.40
   2   7   8  138.29   18.50
  -1  -7  -8  262.07   20.30
  -1  -7  -8  268.47   19.00
   1   7   8  193.48   18.40
   1   7   8  272.17   21.50
   0  -7  -8   61.19   10.10
   0  -7  -8   49.50    9.40
   0  -7  -8   55.59    9.90
   0   7   8   61.59   10.50
   0   7   8   36.50    8.30
   1  -7  -8   98.69   14.90
   1  -7  -8   72.59   11.90
   1  -7  -8   70.29   12.30
  -1   7   8   93.89   15.80
   2  -7  -8  504.35   34.00
   2  -7  -8  466.75   34.80
   2  -7  -8  527.65   34.40
  -2   7   8  553.84   35.30
   3  -7  -8 1581.34   84.99
   3  -7  -8 1586.94   86.79
   3  -7  -8 1585.44   84.99
  -3   7   8 1661.13   85.19
   4  -7  -8  671.73   43.40
   4  -7  -8  653.73   45.40
   4  -7  -8  623.44   43.70
  -4   7   8  567.64   42.20
  -4   7   8  643.34   41.20
   5  -7  -8   39.40   15.10
   5  -7  -8   19.20   15.00
   5  -7  -8   36.90   15.60
  -5   7   8   39.00   12.70
   6  -7  -8  541.35   41.50
   6  -7  -8  393.06   39.10
   6  -7  -8  469.55   43.00
   7  -7  -8  336.07   41.00
   7  -7  -8  395.76   38.80
   7  -7  -8  333.87   39.20
   8  -7  -8   74.39   23.90
   8  -7  -8   75.29   21.80
   8  -7  -8   86.19   26.40
   9  -7  -8  -35.30   19.30
   9  -7  -8    5.40   21.40
 -13  -6  -7   83.89   18.20
 -13  -6  -7  137.39   29.60
  13   6   7   76.39   33.20
  13   6   7  126.89   30.70
  13   6   7  107.89   21.80
 -12  -6  -7  120.09   29.30
 -12  -6  -7  133.29   20.20
  12   6   7  117.69   28.70
  12   6   7  203.38   46.90
  12   6   7  120.99   23.20
 -11  -6  -7  228.08   25.00
 -11  -6  -7  258.07   36.70
  11   6   7  226.38   30.00
  11   6   7  211.58   22.80
  11   6   7  186.58   31.50
  11   6   7  236.08   44.70
 -10  -6  -7  304.17   34.20
  10   6   7  169.18   36.70
  10   6   7  263.57   23.50
  10   6   7  266.47   30.50
  10   6   7  251.77   35.30
  -9  -6  -7    3.70   15.40
   9   6   7   13.80    8.30
   9   6   7   -9.60   13.10
   9   6   7    8.30    7.30
   9   6   7  -10.50   18.70
   9   6   7  -13.00   10.00
  -8  -6  -7  466.05   33.10
  -8  -6  -7  496.55   35.90
  -8  -6  -7  459.95   29.30
   8   6   7  466.95   33.30
   8   6   7  500.05   34.90
   8   6   7  498.55   39.90
   8   6   7  503.65   31.70
   8   6   7  467.25   48.00
   8   6   7  468.45   29.70
  -7  -6  -7   78.39   10.10
  -7  -6  -7   54.59   10.30
  -7  -6  -7   55.59   12.00
   7   6   7   63.29   14.70
   7   6   7   51.89    8.70
   7   6   7   63.39   20.00
   7   6   7   56.19   10.20
   7   6   7   60.69   11.40
   7   6   7   61.69    9.70
  -6  -6  -7  300.37   22.70
  -6  -6  -7  291.57   23.70
  -6  -6  -7  294.27   22.00
  -6  -6  -7  295.07   20.00
  -6  -6  -7  294.87   19.60
   6   6   7  301.87   21.40
   6   6   7  296.17   19.50
   6   6   7  303.27   32.30
   6   6   7  290.07   21.90
   6   6   7  295.57   22.40
   6   6   7  309.27   26.80
  -5  -6  -7  489.65   27.30
  -5  -6  -7  472.65   31.70
  -5  -6  -7  487.75   27.40
   5   6   7  483.85   32.60
   5   6   7  463.85   37.20
   5   6   7  452.55   29.60
   5   6   7  459.95   28.70
   5   6   7  488.65   27.00
   5   6   7  512.35   29.60
  -4  -6  -7  137.69   14.50
  -4  -6  -7  143.19   12.00
   4   6   7  131.69   18.20
   4   6   7  153.88   11.30
   4   6   7  157.68   14.70
   4   6   7  131.29   15.80
   4   6   7  131.59   14.50
  -3  -6  -7  102.39   10.70
  -3  -6  -7  105.99   12.40
   3   6   7   91.19   12.80
   3   6   7   89.99    9.50
   3   6   7   83.29   13.90
   3   6   7  137.19   14.30
  -2  -6  -7 1922.01   94.39
  -2  -6  -7 1776.02   90.99
   2   6   7 1790.72   94.49
   2   6   7 1961.50   93.59
   2   6   7 1839.32   93.29
  -1  -6  -7 2135.99  107.49
  -1  -6  -7 2235.58  109.69
   1   6   7 2254.07  110.09
   1   6   7 2175.08  109.39
   0  -6  -7   12.50    6.60
   0  -6  -7    9.80    5.60
   0  -6  -7    7.80    6.40
   0   6   7    8.20    5.30
   0   6   7   11.00    6.70
   1  -6  -7 2160.88  105.79
   1  -6  -7 2189.48  106.29
   1  -6  -7 2034.50  105.79
  -1   6   7 2112.29  106.49
   2  -6  -7 1883.11   97.49
   2  -6  -7 1966.90   97.69
   2  -6  -7 1927.91   98.59
  -2   6   7 1904.71   96.99
  -2   6   7 1981.60   98.19
   3  -6  -7  271.57   24.20
   3  -6  -7  281.07   23.90
   3  -6  -7  270.07   25.20
  -3   6   7  252.17   23.00
  -3   6   7  291.87   22.60
   4  -6  -7   36.30   12.80
   4  -6  -7   29.00   12.50
   4  -6  -7   30.90   10.80
  -4   6   7   18.20   10.90
  -4   6   7   40.30   10.60
   5  -6  -7   97.79   18.20
   5  -6  -7  102.19   19.90
   5  -6  -7  107.99   17.90
  -5   6   7   71.99   13.90
  -5   6   7   82.39   17.30
   6  -6  -7   16.30   16.80
   6  -6  -7   10.60   15.60
   6  -6  -7   12.60   15.00
  -6   6   7    0.20   15.30
   7  -6  -7   30.60   18.50
   7  -6  -7   64.39   20.50
   7  -6  -7   75.59   21.50
  -7   6   7   31.30   20.00
   8  -6  -7  -11.80   17.30
   8  -6  -7   18.70   19.20
   8  -6  -7    2.60   16.30
   9  -6  -7    8.50   22.40
   9  -6  -7    6.40   16.90
   9  -6  -7  -19.20   18.50
 -13  -5  -6  105.69   30.50
 -13  -5  -6  116.99   21.00
  13   5   6  113.89   25.80
  13   5   6  120.89   29.70
  13   5   6  178.18   47.60
 -12  -5  -6  326.97   31.10
 -12  -5  -6  311.97   45.10
  12   5   6  323.47   39.70
  12   5   6  269.17   50.99
  12   5   6  288.47   43.10
 -11  -5  -6  106.39   24.10
  11   5   6   98.99   31.60
  11   5   6   80.39   23.40
  11   5   6   63.89   12.10
  11   5   6   77.59   18.40
 -10  -5  -6   45.20   19.90
  10   5   6   54.59   18.70
  10   5   6   33.70   10.20
  10   5   6   52.19   28.80
  10   5   6   31.60   16.40
  -9  -5  -6  116.79   22.60
   9   5   6  130.59   15.80
   9   5   6  101.09   19.90
   9   5   6  149.19   17.70
   9   5   6  183.28   36.60
   9   5   6  146.89   24.90
  -8  -5  -6  306.27   30.30
   8   5   6  325.67   29.20
   8   5   6  365.26   24.50
   8   5   6  348.57   33.50
   8   5   6  336.37   23.30
   8   5   6  290.47   40.60
  -7  -5  -6  220.88   22.30
  -7  -5  -6  226.58   19.60
   7   5   6  258.37   22.80
   7   5   6  248.38   26.60
   7   5   6  273.37   18.30
   7   5   6  240.88   32.30
   7   5   6  230.08   19.40
   7   5   6  247.48   19.00
  -6  -5  -6  709.03   41.70
  -6  -5  -6  759.42   39.50
  -6  -5  -6  769.32   42.20
   6   5   6  750.72   41.00
   6   5   6  695.23   40.70
   6   5   6  789.42   47.60
   6   5   6  743.43   43.30
   6   5   6  739.83   40.00
   6   5   6  778.62   54.09
  -5  -5  -6  436.66   24.10
   5   5   6  447.36   34.90
   5   5   6  424.66   30.40
   5   5   6  443.46   24.40
   5   5   6  419.96   25.70
   5   5   6  423.66   26.70
   5   5   6  394.16   25.60
  -4  -5  -6 1095.49   54.59
  -4  -5  -6 1141.69   54.89
  -4  -5  -6 1100.99   59.39
   4   5   6 1041.70   55.79
   4   5   6 1144.19   64.09
   4   5   6 1054.79   56.59
   4   5   6 1103.09   56.49
   4   5   6 1089.39   59.19
   4   5   6 1108.89   54.79
  -3  -5  -6  873.61   48.00
  -3  -5  -6  890.31   44.20
   3   5   6  860.71   50.19
   3   5   6  891.41   43.80
   3   5   6  843.22   46.30
   3   5   6  839.32   45.90
   3   5   6  869.71   45.80
  -2  -5  -6  409.96   22.40
  -2  -5  -6  380.66   24.60
   2   5   6  390.06   24.20
   2   5   6  372.36   25.40
   2   5   6  390.76   24.00
  -1  -5  -6 2936.11  134.39
  -1  -5  -6 2776.32  131.99
   1   5   6 2879.31  133.79
   1   5   6 2318.97  132.99
   1   5   6 2825.12  133.69
   0  -5  -6 2320.97  122.69
   0  -5  -6 2682.23  124.89
   0  -5  -6 2574.04  123.59
   0   5   6 2634.84  125.09
   1  -5  -6 1592.74   80.89
   1  -5  -6 1594.14   81.29
   1  -5  -6 1684.93   81.49
  -1   5   6 1553.44   81.59
  -1   5   6 1665.73   80.79
   2  -5  -6  132.69   15.90
   2  -5  -6  131.29   15.30
   2  -5  -6  145.39   15.10
  -2   5   6  141.89   14.10
  -2   5   6  137.79   15.30
   3  -5  -6  107.09   16.10
   3  -5  -6  126.39   17.20
   3  -5  -6  126.69   15.90
  -3   5   6  105.89   15.10
  -3   5   6  103.99   14.30
   4  -5  -6   57.59   11.50
   4  -5  -6   57.19   11.80
   4  -5  -6  104.69   15.00
   4  -5  -6   54.89   12.50
  -4   5   6   94.09   15.00
  -4   5   6  101.19   17.20
   5  -5  -6    6.40   12.70
   5  -5  -6   13.80   10.80
   5  -5  -6    5.50    9.30
   5  -5  -6   17.70   11.90
  -5   5   6   19.30    8.90
  -5   5   6    3.90   12.50
   6  -5  -6  140.59   22.90
   6  -5  -6  173.38   24.20
   6  -5  -6  182.88   25.60
   6  -5  -6  212.58   29.80
  -6   5   6  189.28   29.70
  -6   5   6  139.59   20.80
   7  -5  -6  341.37   36.40
   7  -5  -6  390.26   35.80
   7  -5  -6  368.76   35.40
   7  -5  -6  385.06   40.00
  -7   5   6  299.87   38.00
   8  -5  -6   21.70   17.00
   8  -5  -6   33.30   20.50
   8  -5  -6   30.30   17.60
   9  -5  -6   52.19   17.70
   9  -5  -6   57.39   22.20
   9  -5  -6   58.59   24.00
  10  -5  -6   47.20   26.50
  10  -5  -6   16.90   20.70
 -13  -4  -5   26.70   16.30
 -13  -4  -5   27.50   24.50
  13   4   5    5.60   22.10
  13   4   5   44.80   34.60
  13   4   5   11.20   20.50
 -12  -4  -5   54.09   25.70
 -12  -4  -5   60.79   16.00
  12   4   5   73.89   33.90
  12   4   5   67.49   25.20
  12   4   5   35.80   18.60
 -11  -4  -5   33.40   23.00
  11   4   5   28.20   19.10
  11   4   5   51.89   28.30
  11   4   5   24.30   15.90
  11   4   5   27.10    9.90
 -10  -4  -5   38.40   20.30
  10   4   5   31.60   16.10
  10   4   5   29.50   23.30
  10   4   5   47.20   20.20
  10   4   5   24.20    8.00
  -9  -4  -5   63.19   20.70
   9   4   5   69.09   27.10
   9   4   5   79.09   12.30
   9   4   5  122.79   20.80
   9   4   5   84.19   20.90
   9   4   5   94.69   12.90
  -8  -4  -5  606.94   43.30
   8   4   5  586.34   36.60
   8   4   5  622.14   43.20
   8   4   5  591.24   55.99
   8   4   5  653.33   46.70
   8   4   5  682.33   37.50
  -7  -4  -5  248.68   23.90
   7   4   5  234.98   24.00
   7   4   5  270.47   19.70
   7   4   5  255.47   18.70
   7   4   5  252.67   32.90
   7   4   5  261.17   26.30
  -6  -4  -5 1035.70   56.69
  -6  -4  -5 1092.39   57.99
   6   4   5 1086.99   60.29
   6   4   5 1034.30   55.89
   6   4   5 1092.59   56.49
   6   4   5 1102.09   69.49
   6   4   5 1149.48   56.49
   6   4   5 1138.19   63.19
  -5  -4  -5 5564.44  249.78
  -5  -4  -5 5021.20  249.38
   5   4   5 5389.46  260.17
   5   4   5 5212.88  251.17
   5   4   5 5282.37  253.87
   5   4   5 4859.81  248.28
   5   4   5 5155.38  248.28
   5   4   5 5418.16  248.88
  -4  -4  -5 2597.74  125.59
   4   4   5 2549.24  127.09
   4   4   5 2711.23  135.39
   4   4   5 2678.43  127.19
   4   4   5 2571.34  127.79
   4   4   5 2642.94  125.99
   4   4   5 2693.53  130.69
  -3  -4  -5  374.56   20.20
  -3  -4  -5  360.96   23.30
  -3  -4  -5  357.76   19.90
   3   4   5  378.26   20.00
   3   4   5  358.56   23.20
   3   4   5  383.76   21.60
   3   4   5  358.76   26.40
   3   4   5  346.77   21.50
   3   4   5  351.56   21.00
  -2  -4  -5 1663.03   80.09
  -2  -4  -5 1658.23   83.19
   2   4   5 1625.64   81.29
   2   4   5 1672.43   79.69
   2   4   5 1536.35   81.29
   2   4   5 1791.02   84.79
  -1  -4  -5   83.99    9.00
  -1  -4  -5   80.89    8.40
   1   4   5   84.49   10.00
   1   4   5   90.89   10.50
   0  -4  -5    1.80    3.40
   0  -4  -5    3.50    4.10
   0   4   5    2.00    4.00
   0   4   5    0.90    3.40
   1  -4  -5  152.38   13.00
   1  -4  -5  148.19   13.50
   1  -4  -5  168.38   13.10
  -1   4   5  138.29   12.30
  -1   4   5  153.88   13.50
   2  -4  -5  688.03   37.90
   2  -4  -5  720.23   37.70
   2  -4  -5  682.83   39.00
  -2   4   5  745.83   38.50
  -2   4   5  603.64   36.90
   3  -4  -5  760.72   45.00
   3  -4  -5  778.52   43.40
   3  -4  -5  788.62   42.80
   3  -4  -5  773.62   42.90
  -3   4   5  758.72   42.50
  -3   4   5  784.22   42.60
   4  -4  -5   28.10   10.20
   4  -4  -5   31.40    9.00
   4  -4  -5   28.60    9.70
   4  -4  -5   29.30    9.50
  -4   4   5   33.20   10.40
  -4   4   5   29.30    7.40
   5  -4  -5  461.75   35.30
   5  -4  -5  438.96   33.80
   5  -4  -5  438.96   32.80
   5  -4  -5  493.85   33.20
  -5   4   5  484.05   30.10
  -5   4   5  469.95   35.20
   6  -4  -5   69.89   15.60
   6  -4  -5   41.20   13.30
   6  -4  -5   43.10   12.10
   6  -4  -5   63.69   13.20
  -6   4   5   46.70   16.70
   7  -4  -5  741.83   52.99
   7  -4  -5  794.32   56.69
   7  -4  -5  811.22   51.69
   7  -4  -5  755.52   51.09
  -7   4   5  784.42   56.79
   8  -4  -5 1051.49   69.19
   8  -4  -5 1081.89   62.99
   8  -4  -5 1011.50   59.89
   8  -4  -5 1032.10   65.69
  -8   4   5  952.80   55.69
  -8   4   5  832.42   66.49
   9  -4  -5  200.48   26.90
   9  -4  -5  169.38   31.10
   9  -4  -5  128.69   24.30
   9  -4  -5  142.29   25.40
  -9   4   5  188.28   22.40
  -9   4   5   92.49   29.00
  10  -4  -5   24.50   19.50
  10  -4  -5   32.50   20.70
  10  -4  -5   45.00   26.00
  11  -4  -5   85.39   24.60
  11  -4  -5  124.39   32.80
 -11   4   5   14.20   28.20
 -13  -3  -4  202.08   35.70
 -13  -3  -4  261.87   30.50
  13   3   4  177.88   33.30
  13   3   4  323.57   47.80
  13   3   4  332.37   63.39
 -12  -3  -4   89.69   27.50
  12   3   4   54.29   21.90
  12   3   4   89.79   26.50
  12   3   4  124.49   40.50
 -11  -3  -4   21.50   23.40
  11   3   4   60.89   30.70
  11   3   4   31.20   21.20
  11   3   4   26.30   17.50
 -10  -3  -4  640.54   52.79
  10   3   4  623.54   38.60
  10   3   4  628.24   65.69
  10   3   4  668.83   51.19
  10   3   4  611.44   52.49
  -9  -3  -4  889.71   58.99
   9   3   4  907.81   58.19
   9   3   4  838.22   47.70
   9   3   4  859.91   72.59
   9   3   4  759.32   48.00
   9   3   4  861.51   59.99
  -8  -3  -4   95.89   18.10
   8   3   4   90.09   15.60
   8   3   4   84.19   17.80
   8   3   4   42.70   19.50
  -7  -3  -4 1183.38   66.89
   7   3   4 1184.98   63.49
   7   3   4 1248.08   63.19
   7   3   4 1282.57   80.99
   7   3   4 1225.48   69.29
   7   3   4 1223.48   71.29
  -6  -3  -4  608.24   36.20
   6   3   4  643.04   33.60
   6   3   4  534.35   44.90
   6   3   4  569.84   39.50
   6   3   4  614.94   38.50
   6   3   4  559.54   33.20
  -5  -3  -4  551.94   30.90
   5   3   4  486.55   28.40
   5   3   4  504.45   29.10
   5   3   4  507.15   39.20
   5   3   4  542.15   29.30
   5   3   4  523.85   35.00
   5   3   4  525.85   33.10
   4   3   4  209.38   14.60
   4   3   4  260.57   23.50
   4   3   4  249.38   14.80
   4   3   4  233.28   15.30
   4   3   4  224.18   17.60
   4   3   4  234.38   19.60
  -3  -3  -4  826.52   39.90
   3   3   4  759.52   40.90
   3   3   4  862.01   47.40
   3   3   4  848.22   40.30
   3   3   4  775.22   43.50
   3   3   4  806.32   41.10
   3   3   4  778.62   41.70
  -2  -3  -4 4879.11  232.88
  -2  -3  -4 5164.88  229.88
   2   3   4 5135.39  229.78
   2   3   4 4813.12  230.68
   2   3   4 4598.04  231.28
   2   3   4 4531.95  230.68
   2   3   4 5078.59  234.58
  -1  -3  -4 4359.16  212.18
  -1  -3  -4 4630.94  214.48
   1   3   4 4289.67  213.38
   1   3   4 4491.15  213.18
   1   3   4 4773.52  214.88
   0  -3  -4 3144.69  142.69
   0  -3  -4 2980.60  141.59
   0   3   4 3038.90  142.69
   0   3   4 2580.54  141.99
   0   3   4 3153.88  142.69
   1  -3  -4 1562.04   74.19
   1  -3  -4 1543.35   74.19
   1  -3  -4 1489.65   74.29
  -1   3   4 1568.34   74.79
  -1   3   4 1388.36   73.69
   2  -3  -4 1145.49   57.69
   2  -3  -4 1112.69   58.59
   2  -3  -4 1148.49   57.09
  -2   3   4 1086.29   56.99
  -2   3   4 1180.58   57.79
   3  -3  -4 1423.06   76.09
   3  -3  -4 1482.75   74.49
   3  -3  -4 1440.66   74.69
   3  -3  -4 1505.55   74.09
  -3   3   4 1429.76   74.19
  -3   3   4 1543.95   74.09
   4  -3  -4  395.76   27.20
   4  -3  -4  388.06   26.90
   4  -3  -4  392.56   29.40
   4  -3  -4  412.96   27.60
  -4   3   4  392.76   25.10
  -4   3   4  426.86   29.10
   5  -3  -4   31.70   10.10
   5  -3  -4    9.50    8.20
   5  -3  -4   16.30    8.20
   5  -3  -4   19.30   10.00
  -5   3   4   18.20    6.60
  -5   3   4   18.50   12.20
   6  -3  -4  832.22   52.49
   6  -3  -4  835.92   54.39
   6  -3  -4  838.92   50.19
   6  -3  -4  894.31   51.29
  -6   3   4  836.12   55.29
  -6   3   4  845.92   46.60
   7  -3  -4  324.47   30.60
   7  -3  -4  339.17   33.10
   7  -3  -4  360.76   30.20
   7  -3  -4  353.06   35.40
  -7   3   4  292.87   39.50
   8  -3  -4  -12.90   14.80
   8  -3  -4   21.40   14.00
   8  -3  -4    2.80   15.80
   8  -3  -4    9.40   13.50
  -8   3   4  -16.00   20.80
   9  -3  -4   14.60   15.30
   9  -3  -4    3.80   16.70
   9  -3  -4    0.10   17.20
   9  -3  -4   20.20   12.50
  -9   3   4  -29.20   20.20
  -9   3   4    8.50   12.20
  10  -3  -4   12.40   18.90
  10  -3  -4    8.20   22.10
  10  -3  -4  -23.00   15.20
 -10   3   4    2.40   14.10
  11  -3  -4    3.50   24.10
  11  -3  -4    3.80   21.00
  11  -3  -4  -10.60   17.90
 -11   3   4    8.70   16.00
 -13  -2  -3   25.00   17.30
 -13  -2  -3   -3.60   26.40
  13   2   3    3.70   22.80
  13   2   3   -4.30   34.20
 -12  -2  -3  266.17   45.60
  12   2   3  407.16   48.80
  12   2   3  331.37   46.40
  12   2   3  319.97   59.29
 -11  -2  -3  770.02   61.99
  11   2   3  774.72   77.29
  11   2   3  810.92   61.89
  11   2   3  862.31   65.69
 -10  -2  -3  236.08   38.00
  10   2   3  140.69   23.40
  10   2   3  131.79   26.10
  10   2   3  122.99   33.40
  -9  -2  -3   63.59   22.80
   9   2   3   67.69   12.70
   9   2   3   51.29   17.10
   9   2   3   82.29   11.80
   9   2   3  105.99   31.90
   9   2   3   58.39   19.80
  -8  -2  -3   61.39   18.30
   8   2   3   44.70    8.80
   8   2   3   44.30   14.80
   8   2   3   45.60   21.30
   8   2   3   54.99    9.60
   8   2   3   58.29   15.10
  -7  -2  -3   92.89   15.60
   7   2   3   67.69   18.10
   7   2   3   79.59   14.20
   7   2   3   70.59   13.90
   7   2   3  119.19   13.50
  -6  -2  -3 1229.58   66.19
   6   2   3 1213.78   63.89
   6   2   3 1334.97   63.59
   6   2   3 1264.37   70.59
   6   2   3 1238.68   68.79
   6   2   3 1167.88   76.89
  -5  -2  -3 4383.26  212.78
   5   2   3 4421.76  215.48
   5   2   3 4399.86  222.88
   5   2   3 4692.03  211.58
   5   2   3 4438.56  216.88
   5   2   3 4305.57  211.58
  -4  -2  -3 3401.46  161.78
   4   2   3 3500.25  161.08
   4   2   3 3294.97  163.68
   4   2   3 3286.37  160.88
   4   2   3 3342.07  165.08
   4   2   3 3423.96  169.88
   3   2   3  225.08   13.20
   3   2   3  220.68   13.30
   3   2   3  225.88   16.90
   3   2   3  222.18   13.70
   3   2   3  223.78   19.50
   3   2   3  205.78   15.60
  -2  -2  -3 4378.66  202.88
   2   2   3 4585.34  203.28
   2   2   3 4108.79  203.68
   2   2   3 4618.74  208.48
   2   2   3 4169.18  203.78
   2   2   3 4290.87  204.38
   2   2   3 4118.29  205.28
  -1  -2  -3 2536.75  120.39
  -1  -2  -3 2543.75  118.19
   1   2   3 2470.65  118.89
   1   2   3 2393.76  119.09
   1   2   3 2663.33  120.99
   1   2   3 2434.96  117.99
   0  -2  -3    4.80    2.90
   0  -2  -3    4.80    2.50
   0   2   3    4.80    3.00
   0   2   3    5.30    3.10
   0   2   3    4.80    3.40
   1  -2  -3 1924.21   91.09
   1  -2  -3 1842.32   91.19
   1  -2  -3 1772.82   91.39
  -1   2   3 2054.79   92.09
   2  -2  -3 7333.97  358.56
   2  -2  -3 7746.12  358.06
   2  -2  -3 7721.73  357.16
   2  -2  -3 7428.46  357.56
  -2   2   3 7981.60  357.76
  -2   2   3 7359.46  357.36
   3  -2  -3   84.79   11.00
   3  -2  -3   71.69    9.10
   3  -2  -3   81.49   11.30
   3  -2  -3   92.89   11.00
  -3   2   3   81.09    9.70
  -3   2   3   79.29   13.60
   4  -2  -3 3458.25  161.48
   4  -2  -3 3309.07  162.08
   4  -2  -3 3199.58  163.78
   4  -2  -3 3299.67  164.68
  -4   2   3 3351.86  163.78
  -4   2   3 3476.05  160.88
   5  -2  -3 1321.87   65.99
   5  -2  -3 1256.47   68.79
   5  -2  -3 1263.37   66.09
   5  -2  -3 1244.18   69.89
  -5   2   3 1284.97   63.99
  -5   2   3 1170.68   68.79
   6  -2  -3  287.57   28.60
   6  -2  -3  286.77   24.10
   6  -2  -3  307.57   24.40
   6  -2  -3  273.17   27.20
  -6   2   3  257.27   31.40
   7  -2  -3  411.66   36.00
   7  -2  -3  393.96   35.00
   7  -2  -3  412.86   31.40
   7  -2  -3  411.66   30.40
  -7   2   3  387.16   40.60
   8  -2  -3  462.55   33.10
   8  -2  -3  426.56   39.90
   8  -2  -3  418.06   34.30
   8  -2  -3  387.86   40.50
  -8   2   3  428.46   46.60
   9  -2  -3   73.19   13.80
   9  -2  -3   42.30   15.70
   9  -2  -3   53.69   21.00
   9  -2  -3   57.69   21.10
  -9   2   3   70.29   15.00
  -9   2   3   20.90   21.90
  10  -2  -3   60.99   21.90
  10  -2  -3   27.60   15.20
  10  -2  -3   29.20   20.10
 -10   2   3   27.30   23.10
 -10   2   3   52.29   15.30
  11  -2  -3  320.07   37.60
  11  -2  -3  366.76   51.19
  11  -2  -3  373.96   46.60
 -11   2   3  362.06   34.70
  12  -2  -3  429.76   57.09
  12  -2  -3  287.17   39.40
  12  -2  -3  448.96   50.09
 -12   2   3  338.67   35.80
 -12  -1  -2   91.99   28.40
  12   1   2   72.09   37.70
  12   1   2  111.89   30.10
  12   1   2  116.59   27.20
 -11  -1  -2   40.50   23.60
  11   1   2   37.50   20.60
  11   1   2   25.40   29.40
  11   1   2   61.99   24.20
 -10  -1  -2   97.49   25.00
  10   1   2  130.99   25.40
  10   1   2  132.19   36.20
  10   1   2   90.69   15.80
  10   1   2  132.59   26.30
  10   1   2  142.09   16.90
  -9  -1  -2  386.96   43.00
   9   1   2  351.16   38.90
   9   1   2  412.76   39.40
   9   1   2  362.36   26.60
   9   1   2  352.36   28.40
   9   1   2  382.36   52.49
  -8  -1  -2  156.98   24.30
   8   1   2  110.69   28.50
   8   1   2  145.59   17.40
   8   1   2  132.89   20.50
   8   1   2  142.09   16.20
   8   1   2  111.79   20.70
  -7  -1  -2   98.29   18.80
   7   1   2  144.09   29.10
   7   1   2  124.19   13.70
   7   1   2  146.49   21.60
   7   1   2  139.39   15.20
   7   1   2  121.59   20.20
  -6  -1  -2  720.73   43.70
   6   1   2  684.53   39.70
   6   1   2  726.43   38.90
   6   1   2  743.53   46.20
   6   1   2  741.43   45.40
   6   1   2  690.83   53.29
  -5  -1  -2   86.59   14.00
   5   1   2   51.39   10.30
   5   1   2   68.79    9.80
   5   1   2   56.39   10.90
   5   1   2   55.39   14.10
  -4  -1  -2  717.53   39.20
   4   1   2  721.63   46.80
   4   1   2  715.13   38.00
   4   1   2  768.72   38.00
   4   1   2  741.93   42.30
   4   1   2  710.13   41.30
  -3  -1  -2 1948.71   94.59
   3   1   2 1896.81   96.99
   3   1   2 1910.61   96.19
   3   1   2 1966.90   93.99
   3   1   2 1888.51  100.49
   3   1   2 2089.69   94.29
   2   1   2  975.80   45.30
   2   1   2  914.81   46.30
   2   1   2  888.61   49.20
   2   1   2  899.81   47.00
   1   1   2 1500.35   70.09
   1   1   2 1408.96   67.49
   1   1   2 1417.16   67.59
   1   1   2 1353.56   68.29
   0  -1  -2 1603.34   73.29
   0  -1  -2 1273.07   72.29
   0   1   2 1501.35   73.19
   0   1   2 1753.02   73.69
   1  -1  -2 2757.32  129.39
   1  -1  -2 2806.82  129.59
   1  -1  -2 2628.74  129.89
   1  -1  -2 2679.53  129.69
  -1   1   2 2617.84  129.59
  -1   1   2 2994.50  130.19
  -1   1   2 2694.63  128.69
   2  -1  -2 5910.21  275.87
   2  -1  -2 6008.90  274.37
   2  -1  -2 5633.14  274.77
   2  -1  -2 5425.96  275.57
  -2   1   2 5894.71  275.47
  -2   1   2 6132.49  274.87
   3  -1  -2 3576.24  173.78
   3  -1  -2 3491.15  173.68
   3  -1  -2 3510.55  171.98
   3  -1  -2 3726.23  171.38
  -3   1   2 3845.02  171.48
  -3   1   2 3455.75  173.08
   4  -1  -2 1505.65   79.89
   4  -1  -2 1511.15   80.09
   4  -1  -2 1666.03   76.89
   4  -1  -2 1495.35   86.59
   4  -1  -2 1510.15   77.39
  -4   1   2 1646.34   76.19
  -4   1   2 1480.65   79.69
   5  -1  -2  241.68   33.90
   5  -1  -2  255.47   18.90
   5  -1  -2  236.88   19.20
   5  -1  -2  230.48   22.90
   5  -1  -2  212.48   21.60
  -5   1   2  238.68   25.90
   6  -1  -2 1216.48   78.19
   6  -1  -2 1195.28   67.49
   6  -1  -2 1159.78   66.89
   6  -1  -2 1121.19   62.39
   6  -1  -2 1217.08   60.99
  -6   1   2 1142.19   67.49
   7  -1  -2 1635.94   90.89
   7  -1  -2 1659.83   82.69
   7  -1  -2 1662.93  102.49
   7  -1  -2 1627.74   90.19
  -7   1   2 1533.85   90.29
   8  -1  -2   80.99   19.40
   8  -1  -2   99.19   20.40
   8  -1  -2  104.69   13.90
   8  -1  -2   66.49   14.50
  -8   1   2   95.89   24.10
   9  -1  -2  403.76   42.10
   9  -1  -2  374.26   32.60
   9  -1  -2  377.56   40.30
  -9   1   2  435.46   44.60
  10  -1  -2   95.79   24.90
  10  -1  -2  106.19   19.80
  10  -1  -2  111.09   25.90
 -10   1   2   97.29   18.20
  11  -1  -2   29.10   22.30
  11  -1  -2   22.70   14.90
  11  -1  -2   39.10   23.10
 -11   1   2   34.80   16.90
 -11   1   2   -1.20   23.30
  12  -1  -2  163.98   24.90
  12  -1  -2  220.88   38.40
 -12   1   2  137.29   31.60
  12   0   1  202.78   37.80
  12   0   1  192.48   36.30
  12   0   1  157.78   51.59
 -11   0  -1  271.27   43.70
  11   0   1  420.26   46.60
  11   0   1  265.27   52.29
  11   0   1  315.97   45.30
 -10   0  -1  106.79   24.70
  10   0   1   98.39   31.80
  10   0   1  115.79   25.40
  10   0   1  101.09   24.20
  10   0   1  132.79   17.80
  -9   0  -1  187.08   30.00
   9   0   1  237.18   24.00
   9   0   1  201.08   29.80
   9   0   1  242.38   21.70
   9   0   1  263.57   44.00
   9   0   1  276.67   34.10
  -8   0  -1 1550.14   89.59
   8   0   1 1643.84   91.39
   8   0   1 1561.84  103.49
   8   0   1 1613.84   91.39
   8   0   1 1521.25   80.49
   8   0   1 1535.85   82.09
  -7   0  -1  575.74   42.10
   7   0   1  506.35   31.50
   7   0   1  540.15   40.20
   7   0   1  506.85   32.80
   7   0   1  486.65   39.10
   7   0   1  513.15   50.09
  -6   0  -1   45.30   13.30
   6   0   1   29.30    7.30
   6   0   1   31.70   15.30
   6   0   1   27.00    6.20
   6   0   1   34.50   10.80
   6   0   1   29.20   10.20
  -5   0  -1  169.48   19.60
   5   0   1  155.78   18.90
   5   0   1  145.69   18.10
   5   0   1  157.08   14.00
  -4   0  -1  422.66   25.80
   4   0   1  414.46   27.10
   4   0   1  386.76   26.80
   4   0   1  351.66   32.40
  -3   0  -1  616.74   35.10
   3   0   1  664.73   37.20
   3   0   1  681.33   34.10
   3   0   1  681.93   41.70
   3   0   1  664.23   34.20
   3   0   1  656.23   36.70
  -2   0  -1  657.03   33.50
   2   0   1  708.03   33.50
   2   0   1  639.74   37.80
   2   0   1  635.84   35.20
   2   0   1  661.03   34.90
   2   0   1  671.63   33.00
   1   0   1   74.69    6.40
   1   0   1   74.79    6.20
   1   0   1   80.99    5.20
   1   0   1   68.59    7.10
   0   0   1  -10.70    0.50
   0   0   1   -8.50    0.90
   0   0   1  -11.10    0.60
   1   0  -1    6.00    1.10
   1   0  -1    3.90    1.60
   1   0  -1    1.10    1.50
  -1   0   1    5.80    1.30
  -1   0   1    5.60    1.80
   2   0  -1  326.27   18.70
   2   0  -1  295.27   22.30
   2   0  -1  304.77   18.40
   2   0  -1  317.47   16.50
   2   0  -1  318.27   17.30
  -2   0   1  278.47   18.40
  -2   0   1  320.77   17.10
   3   0  -1 1049.49   51.69
   3   0  -1 1076.49   61.39
   3   0  -1 1078.49   55.19
   3   0  -1 1071.29   52.99
   3   0  -1  998.10   54.49
  -3   0   1 1010.10   55.39
  -3   0   1 1096.29   52.29
   4   0  -1 2524.95  129.99
   4   0  -1 2549.74  136.79
   4   0  -1 2621.74  130.59
   4   0  -1 2776.42  125.99
   4   0  -1 2732.93  127.89
  -4   0   1 2598.74  129.79
   5   0  -1 2660.93  142.09
   5   0  -1 2663.03  130.19
   5   0  -1 2613.04  133.79
   5   0  -1 2743.13  128.09
   5   0  -1 2684.93  133.69
  -5   0   1 2616.24  132.89
   6   0  -1  759.22   47.70
   6   0  -1  763.72   43.20
   6   0  -1  783.42   57.99
   6   0  -1  763.92   40.60
   6   0  -1  766.72   47.70
  -6   0   1  751.22   48.40
   7   0  -1  291.07   29.30
   7   0  -1  316.27   29.60
   7   0  -1  307.87   42.00
   7   0  -1  309.17   21.50
   7   0  -1  278.67   23.70
  -7   0   1  316.77   33.70
   8   0  -1 1131.79   67.99
   8   0  -1 1098.59   81.29
   8   0  -1 1029.00   60.29
   8   0  -1 1128.69   67.99
   8   0  -1 1086.39   57.19
  -8   0   1 1022.50   67.79
   9   0  -1  183.48   28.70
   9   0  -1  169.08   22.10
   9   0  -1  170.48   39.70
   9   0  -1  141.49   24.80
   9   0  -1  172.08   18.20
  -9   0   1  126.59   26.60
  10   0  -1    2.40   17.60
  10   0  -1   -4.80   10.90
  10   0  -1   -2.70   16.30
  10   0  -1  -37.80   24.90
 -10   0   1   13.70   21.10
 -10   0   1   12.40   13.00
  11   0  -1   55.69   23.80
  11   0  -1   45.80   15.30
  11   0  -1   59.09   24.00
 -11   0   1   10.90   23.10
 -11   0   1   57.79   17.10
  12   0  -1   28.20   24.60
  12   0  -1    8.10   14.40
  12   0  -1   25.80   24.50
 -12   0   1   -6.10   23.30
 -12   0   1   26.60   18.40
 -12   1   0  504.55   41.40
 -12   1   0  403.46   52.29
  12  -1   0  564.84   58.29
  12  -1   0  525.85   60.59
 -11   1   0   42.70   25.50
  11  -1   0   63.49   25.30
  11  -1   0   45.30   24.20
  11  -1   0  -13.50   32.00
 -10   1   0   20.40   22.00
  10  -1   0  -10.90   28.70
  10  -1   0   47.50   11.40
  10  -1   0    3.00   20.50
  10  -1   0   26.70   21.00
  10  -1   0   15.40   12.90
  -9   1   0   80.39   23.20
   9  -1   0   66.99   19.70
   9  -1   0   77.69   20.10
   9  -1   0   44.90   11.80
   9  -1   0   15.70   25.70
  -8   1   0  147.19   26.80
   8  -1   0  185.68   27.20
   8  -1   0  188.98   37.90
   8  -1   0  166.68   20.00
   8  -1   0  192.18   27.30
   8  -1   0  155.18   19.50
  -7   1   0  606.24   46.50
   7  -1   0  576.64   43.60
   7  -1   0  591.34   56.09
   7  -1   0  594.34   36.30
   7  -1   0  572.64   37.20
   7  -1   0  616.14   44.00
  -6   1   0  578.04   40.20
   6  -1   0  522.25   49.30
   6  -1   0  520.25   38.10
   6  -1   0  523.85   37.80
   6  -1   0  548.35   32.10
   6  -1   0  510.75   32.50
  -5   1   0  129.09   21.50
   5  -1   0  149.99   14.60
   5  -1   0  141.19   18.20
   5  -1   0  154.18   19.60
   5  -1   0  150.68   26.10
   5  -1   0  156.28   14.80
  -4   1   0  257.87   21.40
   4  -1   0  267.87   17.60
   4  -1   0  207.68   27.40
   4  -1   0  241.38   17.20
   4  -1   0  242.98   20.40
   4  -1   0  258.07   21.40
  -3   1   0   47.60    8.70
   3  -1   0   58.29   13.50
   3  -1   0   61.69    8.10
   3  -1   0   62.09    9.30
   3  -1   0   48.70    7.00
   3  -1   0   54.89    8.90
  -2   1   0 1415.26   71.29
   2  -1   0 1507.65   71.19
   2  -1   0 1482.65   72.59
   2  -1   0 1465.75   72.59
   2  -1   0 1443.66   76.29
   2  -1   0 1441.86   70.39
  -1   1   0 1193.98   58.39
   1  -1   0 1199.78   59.59
   1  -1   0 1200.88   59.59
   1  -1   0 1143.89   58.39
   1  -1   0 1367.06   59.39
   1  -1   0 1240.28   61.19
   0   1   0  636.44   30.80
   1   1   0 6520.05  288.27
   1   1   0 5956.80  289.37
   1   1   0 5356.66  290.37
   1   1   0 6618.54  288.47
   1   1   0 6191.48  288.17
  -1  -1   0 6467.55  288.07
  -1  -1   0 5952.90  288.17
   2   1   0 1220.58   58.19
   2   1   0 1196.78   58.89
   2   1   0 1176.68   62.49
   2   1   0 1208.58   59.39
   2   1   0 1185.78   56.59
  -2  -1   0 1144.29   58.59
  -2  -1   0 1251.37   57.49
  -2  -1   0 1162.58   58.19
   3   1   0 2992.90  145.29
   3   1   0 2881.41  150.38
   3   1   0 3066.79  145.99
   3   1   0 3083.49  143.79
   3   1   0 3167.48  142.09
  -3  -1   0 2850.71  144.89
  -3  -1   0 2999.70  143.29
   4   1   0  514.25   26.90
   4   1   0  517.25   28.90
   4   1   0  539.95   32.20
   4   1   0  545.05   39.30
   4   1   0  520.55   31.30
  -4  -1   0  454.25   31.70
   5   1   0  655.83   32.80
   5   1   0  610.34   38.10
   5   1   0  589.54   38.60
   5   1   0  565.94   46.10
   5   1   0  602.94   34.80
  -5  -1   0  682.33   39.50
   6   1   0   96.39   12.90
   6   1   0  100.99   16.10
   6   1   0   97.89   10.40
   6   1   0   76.59   13.10
   6   1   0  109.19   22.80
  -6  -1   0   92.69   16.10
   7   1   0  309.47   40.40
   7   1   0  352.96   30.90
   7   1   0  338.37   29.70
   7   1   0  316.87   24.60
   7   1   0  353.06   22.30
  -7  -1   0  413.86   33.70
   8   1   0  226.18   18.40
   8   1   0  236.88   29.10
   8   1   0  232.78   28.50
   8   1   0  174.88   32.10
   8   1   0  218.68   21.80
  -8  -1   0  259.87   33.70
   9   1   0   87.29   30.30
   9   1   0   63.59   18.60
   9   1   0   92.19   21.50
   9   1   0   77.79   14.60
   9   1   0  100.79   14.10
  -9  -1   0   82.09   23.30
  10   1   0    7.60   27.50
  10   1   0   14.60   11.10
  10   1   0   33.70   19.30
  10   1   0   16.10   10.00
  10   1   0    8.40   16.00
 -10  -1   0   31.50   20.70
 -10  -1   0   35.10   14.00
  11   1   0   48.00   20.20
  11   1   0   29.70   12.90
  11   1   0   28.70   32.80
  11   1   0   41.40   22.50
 -11  -1   0   43.50   22.70
 -11  -1   0   62.89   16.40
  12   1   0  459.95   52.59
  12   1   0  460.35   52.09
 -12  -1   0  458.55   38.70
 -12  -1   0  432.26   52.19
  13   1   0  154.18   33.40
  13   1   0  155.78   33.00
 -13  -1   0  158.38   24.50
 -13  -1   0  100.09   30.00
  11  -2  -1  208.88   36.20
  11  -2  -1  176.38   35.20
 -10   2   1    8.60   22.70
  10  -2  -1    2.70   20.50
  10  -2  -1   12.80    9.20
  10  -2  -1    1.10   12.70
  10  -2  -1   22.70   21.40
  -9   2   1   -8.10   20.70
   9  -2  -1    2.20    9.10
   9  -2  -1  -44.80   23.80
   9  -2  -1   -1.90   12.20
   9  -2  -1    5.90   17.80
   9  -2  -1  -10.40   16.20
  -8   2   1   15.10   22.20
   8  -2  -1  -43.90   24.10
   8  -2  -1    4.00   14.20
   8  -2  -1   18.40   15.80
   8  -2  -1   -1.50    9.70
   8  -2  -1   14.50   11.60
  -7   2   1   18.50   19.80
   7  -2  -1   -3.30   20.60
   7  -2  -1   -1.40   12.40
   7  -2  -1    4.70    9.80
   7  -2  -1    1.80    9.60
   7  -2  -1   -3.80   12.40
  -6   2   1  180.38   29.10
   6  -2  -1  198.38   19.90
   6  -2  -1  207.68   24.10
   6  -2  -1  219.08   21.00
   6  -2  -1  217.08   37.10
   6  -2  -1  192.18   25.00
  -5   2   1 1022.10   60.09
   5  -2  -1 1005.40   55.79
   5  -2  -1 1097.39   60.99
   5  -2  -1 1080.79   69.79
   5  -2  -1 1083.59   56.19
   5  -2  -1 1066.49   60.19
  -4   2   1 2777.02  129.69
   4  -2  -1 2455.05  129.69
   4  -2  -1 2475.05  137.19
   4  -2  -1 2568.64  126.89
   4  -2  -1 2601.44  130.69
   4  -2  -1 2761.32  127.29
  -3   2   1  177.78   17.90
   3  -2  -1  166.78   23.50
   3  -2  -1  165.78   13.90
   3  -2  -1  148.59   15.40
   3  -2  -1  153.88   16.80
   3  -2  -1  197.48   16.10
  -2   2   1 1290.57   67.09
   2  -2  -1 1280.27   67.69
   2  -2  -1 1485.85   67.29
   2  -2  -1 1349.66   67.49
   2  -2  -1 1383.86   66.09
   2  -2  -1 1268.97   71.89
  -1   2   1 7129.39  343.07
  -1   2   1 7692.03  342.87
   1  -2  -1 7284.67  343.67
   1  -2  -1 8162.58  344.07
   1  -2  -1 6850.71  343.97
   1  -2  -1 7010.30  345.67
   1  -2  -1 7055.89  342.97
   0   2   1    1.60    2.00
   0  -2  -1    1.70    2.60
   0  -2  -1   -0.30    1.90
   0  -2  -1    1.10    1.60
   0  -2  -1   -0.80    1.80
   1   2   1  129.49    9.10
   1   2   1  139.29    9.60
   1   2   1  152.78    8.80
   1   2   1  157.18    9.00
   1   2   1  137.19    8.90
   1   2   1  160.88    8.70
  -1  -2  -1  148.29    8.70
  -1  -2  -1  157.48    8.60
  -1  -2  -1  137.79    7.90
  -1  -2  -1  147.89    8.20
  -1  -2  -1  139.79    9.60
  -1  -2  -1  150.48    8.70
   2   2   1  231.58   18.20
   2   2   1  242.08   15.20
   2   2   1  271.77   13.70
   2   2   1  259.47   15.40
   2   2   1  272.97   16.20
   2   2   1  273.47   14.70
  -2  -2  -1  251.37   15.30
  -2  -2  -1  253.27   14.50
  -2  -2  -1  249.58   14.70
  -2  -2  -1  270.97   14.10
   3   2   1  488.35   27.10
   3   2   1  494.15   28.40
   3   2   1  472.05   24.00
   3   2   1  515.75   26.00
   3   2   1  457.35   26.30
   3   2   1  456.05   32.60
  -3  -2  -1  453.75   26.20
  -3  -2  -1  469.25   25.10
  -3  -2  -1  441.36   27.00
   4   2   1  564.04   29.30
   4   2   1  529.95   26.90
   4   2   1  534.15   32.30
   4   2   1  482.85   36.80
   4   2   1  531.75   31.10
  -4  -2  -1  493.95   29.00
  -4  -2  -1  492.05   30.70
   5   2   1  338.07   18.90
   5   2   1  331.57   21.50
   5   2   1  327.47   32.10
   5   2   1  318.47   25.10
   5   2   1  327.77   24.30
  -5  -2  -1  312.57   24.40
   6   2   1  335.57   28.20
   6   2   1  339.57   23.30
   6   2   1  316.27   35.70
   6   2   1  364.66   20.70
   6   2   1  323.67   26.60
  -6  -2  -1  342.87   29.00
   7   2   1   76.99   10.00
   7   2   1   62.19   13.00
   7   2   1   84.29   22.40
   7   2   1   54.59   13.60
   7   2   1   68.99   11.00
  -7  -2  -1   51.29   15.50
   8   2   1  993.10   62.59
   8   2   1 1004.10   64.09
   8   2   1 1022.50   57.19
   8   2   1 1065.29   54.09
   8   2   1  999.40   75.09
  -8  -2  -1 1067.29   64.59
   9   2   1   71.59   20.00
   9   2   1   83.29   11.20
   9   2   1   77.79   27.80
   9   2   1   73.09   17.90
   9   2   1   78.19   14.30
  -9  -2  -1   62.69   21.10
  10   2   1  327.87   40.00
  10   2   1  296.77   28.70
  10   2   1  352.66   39.10
  10   2   1  348.87   52.79
 -10  -2  -1  439.46   42.50
 -10  -2  -1  365.66   30.40
  11   2   1  791.12   61.49
  11   2   1  840.12   61.09
  11   2   1  781.22   76.69
  11   2   1  690.83   47.90
 -11  -2  -1  711.53   48.10
 -11  -2  -1  755.12   59.19
  12   2   1  313.27   42.80
  12   2   1  253.77   54.59
  12   2   1  342.67   44.60
  12   2   1  320.37   42.90
 -12  -2  -1  243.18   29.90
 -12  -2  -1  254.07   43.60
  13   2   1   23.90   24.10
  13   2   1   49.80   24.10
  13   2   1  -58.29   34.50
 -13  -2  -1   33.70   17.40
 -13  -2  -1  -13.40   22.60
 -11   3   2  -41.10   22.90
  11  -3  -2  -14.30   23.80
  11  -3  -2   21.70   25.30
  11  -3  -2  -21.90   26.00
 -10   3   2   -2.80   22.40
  10  -3  -2   11.60   21.20
  10  -3  -2   25.20   11.50
  10  -3  -2   -6.30   15.50
  10  -3  -2  -32.30   19.20
  -9   3   2   17.90   21.50
   9  -3  -2    8.70   11.20
   9  -3  -2    0.40   13.70
   9  -3  -2   23.00   18.30
   9  -3  -2   -3.40   17.30
   8  -3  -2  186.38   25.90
   8  -3  -2  190.48   30.60
   8  -3  -2  212.88   26.60
   8  -3  -2  213.78   30.40
  -7   3   2  990.90   67.29
   7  -3  -2 1063.79   60.09
   7  -3  -2 1013.40   65.79
   7  -3  -2 1062.09   59.89
   7  -3  -2 1050.69   79.79
   7  -3  -2 1046.90   65.19
  -6   3   2 1687.93   89.69
   6  -3  -2 1642.34   90.19
   6  -3  -2 1652.83  100.29
   6  -3  -2 1577.44   88.79
   6  -3  -2 1597.74   84.59
   6  -3  -2 1561.54   84.39
  -5   3   2  520.55   36.50
   5  -3  -2  426.86   31.10
   5  -3  -2  387.66   33.10
   5  -3  -2  445.36   43.80
  -4   3   2 1193.08   68.29
   4  -3  -2 1283.07   68.49
   4  -3  -2 1221.08   75.89
   4  -3  -2 1310.37   70.09
   4  -3  -2 1401.96   67.89
   4  -3  -2 1245.68   65.79
  -3   3   2 3796.72  190.58
  -3   3   2 4037.00  188.38
   3  -3  -2 3988.40  189.88
   3  -3  -2 3895.71  196.68
   3  -3  -2 3969.90  191.58
   3  -3  -2 3937.11  192.68
   3  -3  -2 4146.39  190.78
  -2   3   2 2127.39   98.09
  -2   3   2 2127.09   99.19
   2  -3  -2 1977.80   99.49
   2  -3  -2 1851.81  100.19
   2  -3  -2 1937.81   98.59
   2  -3  -2 2165.08   99.89
  -1   3   2   18.10    4.90
  -1   3   2   17.40    4.20
   1  -3  -2   10.60    5.40
   1  -3  -2    7.80    4.30
   1  -3  -2   30.80    6.00
   1  -3  -2   14.90    4.30
   0   3   2  171.88   11.60
   0  -3  -2  138.39   10.50
   0  -3  -2  149.39   11.80
   1   3   2  392.56   22.00
  -1  -3  -2  394.46   21.30
  -1  -3  -2  399.46   21.40
   2   3   2 5803.12  262.07
   2   3   2 5600.44  261.77
   2   3   2 5125.99  262.37
   2   3   2 5303.67  264.27
   2   3   2 5770.62  262.87
   2   3   2 5793.02  261.87
  -2  -3  -2 5693.33  262.67
  -2  -3  -2 5579.54  261.27
  -2  -3  -2 5326.87  261.07
  -2  -3  -2 5696.03  261.47
  -2  -3  -2 5549.34  261.47
   3   3   2  475.65   32.10
   3   3   2  541.75   29.80
   3   3   2  475.85   27.50
   3   3   2  510.25   26.10
   3   3   2  509.55   28.00
   3   3   2  523.65   27.00
  -3  -3  -2  486.15   27.90
  -3  -3  -2  529.65   27.70
  -3  -3  -2  464.45   27.10
  -3  -3  -2  484.25   26.40
   4   3   2 1179.98   67.89
   4   3   2 1155.28   60.29
   4   3   2 1285.37   63.99
   4   3   2 1186.08   58.49
   4   3   2 1227.18   61.89
   4   3   2 1231.28   60.39
  -4  -3  -2 1155.18   60.59
  -4  -3  -2 1237.18   59.49
  -4  -3  -2 1142.59   60.69
   5   3   2  312.17   23.10
   5   3   2  303.67   20.50
   5   3   2  318.77   20.50
   5   3   2  323.17   18.20
   5   3   2  306.87   24.40
   5   3   2  289.27   29.90
  -5  -3  -2  287.27   20.60
  -5  -3  -2  315.07   22.80
   6   3   2 1331.87   69.49
   6   3   2 1440.26   67.29
   6   3   2 1262.87   81.19
   6   3   2 1335.27   74.49
   6   3   2 1369.46   73.09
  -6  -3  -2 1297.27   69.29
  -6  -3  -2 1405.76   72.29
   7   3   2  517.25   38.10
   7   3   2  550.14   32.60
   7   3   2  554.64   37.00
   7   3   2  534.35   29.70
   7   3   2  515.15   46.40
  -7  -3  -2  468.25   37.50
   8   3   2  302.57   29.60
   8   3   2  315.27   24.60
   8   3   2  300.37   41.50
   8   3   2  305.97   31.50
   8   3   2  358.46   22.50
  -8  -3  -2  353.16   35.60
   9   3   2 1348.47   75.69
   9   3   2 1348.27   96.49
   9   3   2 1485.45   72.99
   9   3   2 1413.06   82.69
   9   3   2 1352.46   84.59
  -9  -3  -2 1503.65   83.89
  -9  -3  -2 1423.56   75.39
  10   3   2  866.41   49.80
  10   3   2  876.31   52.59
  10   3   2  986.20   62.79
  10   3   2  875.11   76.19
  10   3   2  841.82   63.09
 -10  -3  -2  858.71   52.29
 -10  -3  -2  872.61   62.89
  11   3   2   61.79   13.60
  11   3   2   71.79   20.30
  11   3   2   63.99   22.70
  11   3   2   76.09   34.40
 -11  -3  -2   58.49   22.80
 -11  -3  -2   56.79   15.10
  12   3   2   29.30   19.60
  12   3   2   64.39   37.50
  12   3   2   63.39   24.60
 -12  -3  -2   71.79   17.20
 -12  -3  -2   63.09   25.80
  13   3   2  -16.00   40.00
  13   3   2   37.80   22.20
  13   3   2   44.60   25.00
 -13  -3  -2   10.90   23.50
 -13  -3  -2   39.40   17.40
 -11   4   3  107.59   33.80
  11  -4  -3  189.58   33.40
 -10   4   3  -13.60   23.60
  10  -4  -3   41.70   14.50
  10  -4  -3   53.69   26.50
  10  -4  -3   56.89   24.00
  -9   4   3  104.19   28.10
   9  -4  -3  209.58   33.60
   9  -4  -3  176.58   25.40
   9  -4  -3  282.87   36.10
  -8   4   3  724.83   59.49
   8  -4  -3  768.42   51.19
   8  -4  -3  868.51   53.59
   8  -4  -3  835.82   57.99
   8  -4  -3  841.62   61.09
  -7   4   3  789.42   55.29
   7  -4  -3  572.64   45.40
   7  -4  -3  718.03   52.69
   7  -4  -3  738.53   47.00
   7  -4  -3  708.03   50.59
  -6   4   3  205.58   32.40
   6  -4  -3  170.98   23.80
  -5   4   3  101.99   19.40
   5  -4  -3  130.89   18.30
   5  -4  -3  122.99   17.70
   5  -4  -3  120.19   18.80
   5  -4  -3  123.19   16.10
  -4   4   3   81.49   11.40
  -4   4   3  102.99   16.20
   4  -4  -3   94.39   13.00
   4  -4  -3  111.19   15.40
   4  -4  -3   96.89   15.50
   4  -4  -3   87.49   14.10
  -3   4   3 1114.59   58.29
  -3   4   3 1052.99   56.09
   3  -4  -3 1136.89   58.09
   3  -4  -3 1118.29   60.59
   3  -4  -3 1093.09   59.19
   3  -4  -3 1106.29   58.69
  -2   4   3   97.39   11.00
  -2   4   3  111.79   11.80
   2  -4  -3  108.59   12.10
   2  -4  -3   93.79   14.10
   2  -4  -3  104.59   11.40
   2  -4  -3  109.09   14.10
  -1   4   3   30.80    5.50
   1  -4  -3   15.40    5.70
   0   4   3   19.40    4.80
   0  -4  -3   22.10    5.00
   0  -4  -3   12.30    4.50
   0  -4  -3   17.90    5.50
   1   4   3 2508.55  117.99
   1   4   3 2240.88  116.29
  -1  -4  -3 2569.84  117.79
  -1  -4  -3 2611.24  117.29
  -1  -4  -3 2293.07  116.79
   2   4   3 7338.77  335.57
   2   4   3 6699.93  337.17
   2   4   3 7424.16  335.87
   2   4   3 7381.26  335.27
   2   4   3 7112.29  336.07
   2   4   3 6770.82  336.57
  -2  -4  -3 6837.82  335.07
  -2  -4  -3 7066.79  336.67
  -2  -4  -3 7439.16  335.67
  -2  -4  -3 7316.97  334.57
   3   4   3 1738.53   80.99
   3   4   3 1698.03   81.49
   3   4   3 1623.34   85.39
   3   4   3 1710.83   81.19
   3   4   3 1686.23   83.19
   3   4   3 1546.75   81.79
  -3  -4  -3 1610.24   82.79
  -3  -4  -3 1627.64   80.39
  -3  -4  -3 1583.84   80.39
  -3  -4  -3 1751.52   82.79
  -3  -4  -3 1709.83   80.59
  -3  -4  -3 1714.33   80.69
   4   4   3 4626.04  236.08
   4   4   3 5007.30  229.48
   4   4   3 5019.80  232.98
   4   4   3 4922.21  230.68
   4   4   3 4465.45  229.58
   4   4   3 5034.50  228.78
  -4  -4  -3 4784.02  229.38
  -4  -4  -3 4980.20  231.18
  -4  -4  -3 4911.01  228.78
  -4  -4  -3 4593.24  230.68
   5   4   3 5967.90  287.27
   5   4   3 6321.97  285.77
   5   4   3 6157.18  284.07
   5   4   3 6387.86  290.27
   5   4   3 6058.79  295.57
   5   4   3 5697.33  285.47
  -5  -4  -3 5826.42  285.67
  -5  -4  -3 5619.54  286.17
  -5  -4  -3 6095.79  284.57
   6   4   3 1003.90   56.29
   6   4   3  996.10   63.39
   6   4   3  964.20   53.49
   6   4   3  898.11   50.39
   6   4   3  996.40   50.79
   6   4   3  963.80   48.50
  -6  -4  -3  947.11   49.60
  -6  -4  -3  870.01   50.99
  -6  -4  -3  900.71   52.09
   7   4   3   26.90    7.70
   7   4   3   25.00    5.90
   7   4   3   19.90   15.00
   7   4   3   26.10    9.60
   7   4   3   39.20   12.20
  -7  -4  -3   22.10    7.30
  -7  -4  -3   25.90   12.00
  -7  -4  -3   21.90    7.70
   8   4   3  145.29   16.00
   8   4   3  136.09   19.30
   8   4   3  150.78   14.40
   8   4   3  152.98   30.10
   8   4   3  143.99   21.40
  -8  -4  -3  133.59   21.60
  -8  -4  -3  122.29   16.50
   9   4   3   23.40   12.30
   9   4   3   13.40    7.10
   9   4   3   16.80   22.50
   9   4   3   20.00    8.10
   9   4   3   -7.00   13.70
  -9  -4  -3   -1.60    9.80
  -9  -4  -3   -4.90   18.20
  10   4   3  -15.70   14.60
  10   4   3   14.40   23.30
  10   4   3    5.30    8.00
  10   4   3    0.00    6.60
  10   4   3   11.10   13.00
 -10  -4  -3  -19.90   10.30
 -10  -4  -3   -2.40   20.00
  11   4   3   14.00   17.30
  11   4   3   11.50   14.30
  11   4   3    5.30   24.30
  11   4   3   11.00    9.40
 -11  -4  -3    9.70   20.30
 -11  -4  -3    1.20   11.00
  12   4   3   55.09   34.70
  12   4   3   98.89   23.80
  12   4   3   81.59   24.50
 -12  -4  -3   77.79   16.90
 -12  -4  -3   92.19   26.00
  13   4   3  -48.30   29.90
  13   4   3   -2.40   19.00
  13   4   3   25.80   22.20
 -13  -4  -3    9.90   14.50
 -13  -4  -3   -1.10   22.00
  10  -5  -4  129.49   27.30
  10  -5  -4  178.68   35.90
   9  -5  -4   77.89   23.50
   9  -5  -4   68.09   21.30
   9  -5  -4   48.40   24.50
   9  -5  -4   80.29   17.30
  -8   5   4  -15.40   20.50
   8  -5  -4   13.50   15.90
   8  -5  -4   21.40   16.20
   8  -5  -4    1.30   14.50
   8  -5  -4   23.00   18.80
  -7   5   4   30.90   21.30
   7  -5  -4   56.99   18.10
   7  -5  -4   45.40   18.10
   7  -5  -4   56.79   17.40
   7  -5  -4   35.60   19.30
  -6   5   4   12.40   17.40
   6  -5  -4   27.20   13.80
   6  -5  -4   -0.30   15.00
   6  -5  -4   11.90   14.40
   6  -5  -4   28.30   13.80
  -5   5   4    4.60    7.50
  -5   5   4   10.60   14.30
   5  -5  -4  -12.00   13.00
   5  -5  -4    0.70   10.30
   5  -5  -4   -2.30   11.70
   5  -5  -4    2.90    8.70
  -4   5   4  108.99   15.90
  -4   5   4  108.09   14.60
   4  -5  -4  109.49   15.80
   4  -5  -4  104.69   15.90
   4  -5  -4   88.09   16.10
   4  -5  -4  119.89   15.00
  -3   5   4 1110.19   57.59
  -3   5   4 1080.09   57.29
   3  -5  -4 1095.19   58.49
   3  -5  -4 1098.99   59.99
   3  -5  -4 1117.39   58.49
   3  -5  -4 1076.99   60.99
  -2   5   4   73.39   11.10
  -2   5   4   85.29   12.80
   2  -5  -4   83.89   12.10
   2  -5  -4   93.99   12.00
   2  -5  -4   92.89   13.80
  -1   5   4  254.67   17.90
  -1   5   4  216.58   14.90
   1  -5  -4  231.68   17.00
   1  -5  -4  251.97   18.00
   1  -5  -4  214.68   18.20
   0   5   4 3469.15  159.08
   0  -5  -4 3673.43  159.28
   0  -5  -4 3165.08  158.28
   0  -5  -4 2889.81  157.48
   1   5   4  336.07   21.60
  -1  -5  -4  298.17   19.70
  -1  -5  -4  333.77   20.60
  -1  -5  -4  367.16   21.20
   2   5   4 1169.68   58.19
   2   5   4 1029.60   57.79
   2   5   4 1181.28   56.39
   2   5   4 1093.39   58.09
  -2  -5  -4 1145.29   56.49
  -2  -5  -4 1169.38   56.79
  -2  -5  -4 1167.48   58.09
   3   5   4 2954.70  138.69
   3   5   4 2994.50  140.19
   3   5   4 2915.01  139.49
   3   5   4 3008.10  138.79
   3   5   4 2761.52  140.19
   3   5   4 2732.33  142.49
  -3  -5  -4 2862.01  138.59
  -3  -5  -4 3000.40  137.89
  -3  -5  -4 2854.91  138.29
  -3  -5  -4 2888.51  140.69
   4   5   4  324.07   19.70
   4   5   4  302.37   25.20
   4   5   4  307.47   20.30
   4   5   4  303.97   18.70
   4   5   4  314.37   22.90
   4   5   4  277.77   20.60
  -4  -5  -4  307.17   18.50
  -4  -5  -4  304.57   21.70
  -4  -5  -4  321.57   19.00
  -4  -5  -4  288.07   18.80
  -4  -5  -4  305.07   18.70
  -4  -5  -4  307.17   20.70
   5   5   4   53.79    9.20
   5   5   4   58.79    9.30
   5   5   4   46.10   11.40
   5   5   4   39.40   12.90
   5   5   4   45.00    8.40
   5   5   4   45.90    7.10
  -5  -5  -4   61.79    8.40
  -5  -5  -4   52.49    9.20
  -5  -5  -4   45.80    8.90
  -5  -5  -4   64.59    9.70
  -5  -5  -4   61.19    7.80
  -5  -5  -4   55.69    7.70
   6   5   4  349.47   25.00
   6   5   4  326.07   23.90
   6   5   4  343.77   34.00
   6   5   4  361.46   22.50
   6   5   4  334.77   21.00
   6   5   4  337.07   28.20
  -6  -5  -4  317.27   24.10
  -6  -5  -4  329.37   21.90
  -6  -5  -4  331.17   25.20
   7   5   4   32.80    7.60
   7   5   4   19.50   11.50
   7   5   4   21.00    9.20
   7   5   4   25.90    8.20
   7   5   4   31.90    6.50
   7   5   4   41.00   17.10
  -7  -5  -4   38.30    8.20
  -7  -5  -4   33.60    8.70
  -7  -5  -4   29.40   12.00
   8   5   4    6.40   16.00
   8   5   4   14.70    9.20
   8   5   4   12.10    5.80
   8   5   4   11.20   12.40
   8   5   4   13.50    7.90
   8   5   4   17.60    7.00
  -8  -5  -4   14.40    8.30
  -8  -5  -4    8.80    8.30
  -8  -5  -4   11.30   14.40
   9   5   4  184.98   19.20
   9   5   4  205.58   18.30
   9   5   4  186.28   25.00
   9   5   4  171.88   35.20
   9   5   4  205.68   29.90
  -9  -5  -4  204.28   21.20
  -9  -5  -4  206.28   28.10
  10   5   4  116.49   24.40
  10   5   4  162.78   17.80
  10   5   4  151.58   19.50
  10   5   4  146.69   23.30
  10   5   4  161.68   35.60
 -10  -5  -4  164.98   27.90
 -10  -5  -4  148.69   21.40
  11   5   4   12.90    9.30
  11   5   4   28.50   15.00
  11   5   4   17.10   17.60
  11   5   4   30.50   24.80
 -11  -5  -4   26.00   12.20
 -11  -5  -4   26.80   20.80
  12   5   4  247.28   35.50
  12   5   4  205.38   33.90
  12   5   4  188.58   44.30
 -12  -5  -4  261.27   41.50
 -12  -5  -4  228.48   27.30
  13   5   4  324.17   59.79
  13   5   4  413.16   49.80
 -13  -5  -4  351.86   48.00
 -13  -5  -4  401.26   36.30
   9  -6  -5  -18.00   17.80
   9  -6  -5  -16.50   22.50
   9  -6  -5   17.20   14.90
   8  -6  -5  110.49   23.60
   8  -6  -5  118.19   27.60
   8  -6  -5  100.89   19.90
   7  -6  -5  261.17   36.40
   7  -6  -5  241.68   31.70
  -6   6   5    5.30   16.60
   6  -6  -5   29.80   16.90
   6  -6  -5   32.20   14.90
   6  -6  -5   14.70   13.70
   6  -6  -5   28.40   17.20
  -5   6   5  164.48   25.20
  -5   6   5  135.39   18.30
   5  -6  -5  130.39   20.90
   5  -6  -5  163.98   23.50
   5  -6  -5  175.98   23.60
   5  -6  -5  159.08   21.70
  -4   6   5   53.39   10.00
  -4   6   5   27.20   11.40
   4  -6  -5   33.90    9.50
   4  -6  -5   46.40   13.40
   4  -6  -5   26.60   13.80
   4  -6  -5   35.70   10.80
  -3   6   5  632.14   37.70
  -3   6   5  621.24   36.80
   3  -6  -5  647.14   38.70
   3  -6  -5  602.54   40.30
   3  -6  -5  667.23   37.60
   3  -6  -5  639.24   41.40
  -2   6   5 2973.60  142.59
  -2   6   5 2725.33  140.29
   2  -6  -5 2946.01  144.79
   2  -6  -5 3052.79  142.99
   2  -6  -5 2870.31  143.19
  -1   6   5 1534.25   72.69
   1  -6  -5 1363.46   71.29
   1  -6  -5 1232.88   72.19
   1  -6  -5 1460.45   72.39
   0   6   5   22.80    4.70
   0   6   5   20.30    7.10
   0  -6  -5   23.60    7.10
   0  -6  -5   31.80    7.20
   0  -6  -5   31.20    8.00
   1   6   5 1682.23   86.99
  -1  -6  -5 1804.42   86.29
  -1  -6  -5 1695.23   85.49
  -1  -6  -5 1748.03   86.79
   2   6   5  724.13   38.90
   2   6   5  694.03   39.20
   2   6   5  570.84   36.70
  -2  -6  -5  700.43   37.90
  -2  -6  -5  705.13   36.60
  -2  -6  -5  677.13   36.30
   3   6   5  210.28   17.70
   3   6   5  198.58   14.80
   3   6   5  218.28   18.10
   3   6   5  187.28   17.50
   3   6   5  210.18   14.20
  -3  -6  -5  204.58   15.00
  -3  -6  -5  217.78   13.90
  -3  -6  -5  204.78   16.40
  -3  -6  -5  203.18   15.20
   4   6   5 2505.65  118.19
   4   6   5 2427.46  115.49
   4   6   5 2481.35  116.59
   4   6   5 2259.27  121.19
   4   6   5 2450.25  115.29
   4   6   5 2227.38  116.79
  -4  -6  -5 2285.57  114.29
  -4  -6  -5 2400.46  117.99
  -4  -6  -5 2378.26  114.29
  -4  -6  -5 2340.87  114.69
  -4  -6  -5 2371.86  115.09
   5   6   5 1258.77   75.89
   5   6   5 1374.26   71.89
   5   6   5 1339.97   67.19
   5   6   5 1332.37   68.39
   5   6   5 1388.46   68.09
   5   6   5 1283.27   68.99
  -5  -6  -5 1342.37   66.89
  -5  -6  -5 1394.66   66.89
  -5  -6  -5 1272.17   69.99
  -5  -6  -5 1327.67   70.19
  -5  -6  -5 1346.57   66.89
  -5  -6  -5 1321.27   67.29
   6   6   5  423.36   27.50
   6   6   5  383.96   27.70
   6   6   5  411.86   25.40
   6   6   5  413.26   25.40
   6   6   5  408.46   37.50
   6   6   5  365.66   31.10
  -6  -6  -5  399.96   27.50
  -6  -6  -5  414.46   28.60
  -6  -6  -5  415.66   24.90
  -6  -6  -5  403.16   25.00
  -6  -6  -5  426.76   25.60
  -6  -6  -5  396.96   27.30
   7   6   5   39.80   17.40
   7   6   5   31.30    9.40
   7   6   5   32.60    7.00
   7   6   5   47.60    8.60
   7   6   5   31.60   12.90
   7   6   5   31.00    9.60
  -7  -6  -5   38.90    9.00
  -7  -6  -5   33.80    9.40
  -7  -6  -5   41.80   12.40
   8   6   5  269.67   39.60
   8   6   5  334.07   23.50
   8   6   5  315.17   26.80
   8   6   5  305.47   31.70
   8   6   5  321.67   26.50
   8   6   5  336.47   22.50
  -8  -6  -5  315.07   30.60
  -8  -6  -5  300.17   23.70
  -8  -6  -5  302.67   26.90
   9   6   5   89.89   20.50
   9   6   5   89.99   16.70
   9   6   5   78.29   27.70
   9   6   5   75.29   11.50
   9   6   5   88.49   13.30
  -9  -6  -5   76.29   20.30
  -9  -6  -5   72.49   13.40
  10   6   5  158.68   20.20
  10   6   5  190.38   28.50
  10   6   5  145.09   22.40
  10   6   5  188.08   37.70
  10   6   5  216.28   20.00
 -10  -6  -5  212.28   29.40
 -10  -6  -5  188.58   22.40
  11   6   5  612.44   46.30
  11   6   5  607.44   64.99
  11   6   5  554.24   39.40
  11   6   5  575.44   50.79
 -11  -6  -5  527.85   38.90
 -11  -6  -5  580.64   50.39
  12   6   5   37.90   15.90
  12   6   5   27.60   26.40
  12   6   5   34.90   19.50
 -12  -6  -5   22.50   13.20
 -12  -6  -5   32.30   23.00
  13   6   5  123.39   40.50
  13   6   5  141.49   26.20
  13   6   5  114.79   30.20
 -13  -6  -5  120.69   21.00
 -13  -6  -5  154.08   30.80
   9  -7  -6   -6.80   22.40
   9  -7  -6   13.30   15.50
   9  -7  -6   -8.70   20.60
   8  -7  -6   62.19   24.90
   8  -7  -6   59.89   18.50
   8  -7  -6   62.59   22.70
   7  -7  -6  405.06   41.00
   7  -7  -6  467.75   41.40
   7  -7  -6  437.46   44.40
   6  -7  -6  363.06   38.80
   6  -7  -6  479.15   38.70
   6  -7  -6  429.16   42.40
   5  -7  -6   14.40   15.70
   5  -7  -6   34.80   16.40
   5  -7  -6   26.00   14.40
  -4   7   6  392.16   30.20
   4  -7  -6  415.76   36.50
   4  -7  -6  434.36   36.80
   4  -7  -6  442.46   33.60
  -3   7   6  593.14   36.60
   3  -7  -6  571.54   40.00
   3  -7  -6  602.54   37.50
   3  -7  -6  484.15   38.60
  -2   7   6  351.66   25.60
   2  -7  -6  301.47   26.70
   2  -7  -6  292.37   24.00
   2  -7  -6  282.47   26.10
  -1   7   6  293.47   23.50
  -1   7   6  264.67   18.30
   1  -7  -6  281.97   23.70
   1  -7  -6  291.07   22.20
   1  -7  -6  294.77   23.10
   0   7   6  405.76   26.80
   0   7   6  319.07   21.30
   0  -7  -6  378.56   25.60
   0  -7  -6  352.76   24.20
   0  -7  -6  397.16   25.80
   1   7   6  709.23   43.70
  -1  -7  -6  792.12   43.80
  -1  -7  -6  777.72   42.30
  -1  -7  -6  807.92   43.10
   2   7   6  107.89   15.90
  -2  -7  -6  105.19   13.40
  -2  -7  -6  107.89   12.70
  -2  -7  -6  104.39   13.20
   3   7   6   78.09    9.20
   3   7   6   69.49   10.70
   3   7   6   72.79   11.70
   3   7   6   83.09   12.30
  -3  -7  -6   82.29   10.20
  -3  -7  -6   80.89   11.60
  -3  -7  -6   83.69   10.50
   4   7   6  156.78   19.10
   4   7   6  191.68   13.80
   4   7   6  180.98   14.90
   4   7   6  141.09   16.60
   4   7   6  183.58   18.30
   4   7   6  170.18   17.80
  -4  -7  -6  178.18   16.50
  -4  -7  -6  171.98   14.80
  -4  -7  -6  181.48   13.90
  -4  -7  -6  169.48   14.60
   5   7   6   34.20    8.30
   5   7   6   11.50    4.70
   5   7   6   28.70    8.40
   5   7   6   30.90    7.60
   5   7   6   16.20    9.80
   5   7   6   22.10    9.60
  -5  -7  -6   30.20    7.30
  -5  -7  -6   29.60    7.10
  -5  -7  -6   11.10    5.50
  -5  -7  -6   15.20    7.50
  -5  -7  -6   24.00    6.50
  -5  -7  -6   16.40    5.70
   6   7   6  945.81   48.90
   6   7   6  945.21   50.49
   6   7   6  856.61   59.79
   6   7   6  930.01   49.99
   6   7   6  862.61   51.09
   6   7   6  913.21   54.79
  -6  -7  -6  918.41   48.60
  -6  -7  -6  877.81   49.50
  -6  -7  -6  935.11   48.70
  -6  -7  -6  935.61   48.80
  -6  -7  -6  887.61   52.29
  -6  -7  -6  935.01   52.29
   7   7   6  476.55   30.00
   7   7   6  464.85   33.40
   7   7   6  494.55   32.00
   7   7   6  490.85   37.50
   7   7   6  461.75   43.70
   7   7   6  485.35   29.70
  -7  -7  -6  463.45   31.90
  -7  -7  -6  465.85   29.40
  -7  -7  -6  482.85   32.90
  -7  -7  -6  478.25   29.40
  -7  -7  -6  479.25   29.80
  -7  -7  -6  453.65   33.50
   8   7   6  331.17   26.80
   8   7   6  325.47   23.60
   8   7   6  319.47   23.60
   8   7   6  305.67   31.80
   8   7   6  298.37   40.80
   8   7   6  302.97   28.50
  -8  -7  -6  321.87   24.50
  -8  -7  -6  335.17   28.70
  -8  -7  -6  303.47   29.40
  -8  -7  -6  332.47   23.60
  -8  -7  -6  308.67   23.40
  -8  -7  -6  321.57   25.50
   9   7   6 1195.38   70.39
   9   7   6 1232.68   88.49
   9   7   6 1213.48   76.39
   9   7   6 1246.98   65.39
   9   7   6 1271.77   66.79
   9   7   6 1183.68   69.99
  -9  -7  -6 1211.88   72.09
  -9  -7  -6 1223.38   66.59
  -9  -7  -6 1242.08   71.49
  10   7   6 1004.10   67.89
  10   7   6 1013.20   56.69
  10   7   6 1034.20   80.59
  10   7   6 1007.80   55.09
  10   7   6  958.00   61.79
 -10  -7  -6  942.11   56.69
 -10  -7  -6  969.60   64.19
  11   7   6  130.69   36.40
  11   7   6  100.89   24.00
  11   7   6  113.69   20.10
 -11  -7  -6   94.09   16.70
 -11  -7  -6  111.49   24.60
  12   7   6   37.00   27.90
  12   7   6   34.60   19.90
  12   7   6   16.20   13.40
 -12  -7  -6   -8.50   10.90
 -12  -7  -6  -12.40   18.90
  13   7   6   44.60   17.40
  13   7   6    5.80   27.40
  13   7   6   23.50   21.10
 -13  -7  -6    0.30   22.70
 -13  -7  -6   -3.10   13.30
   8  -8  -7  194.98   33.80
   8  -8  -7  190.08   28.00
   8  -8  -7  227.38   32.40
   7  -8  -7  -11.60   16.70
   7  -8  -7   17.60   17.80
   7  -8  -7   42.00   20.60
   6  -8  -7  187.58   29.80
   6  -8  -7  170.88   26.10
   6  -8  -7  146.69   25.00
   5  -8  -7  245.08   30.00
   5  -8  -7  139.79   23.00
   5  -8  -7  195.18   28.00
  -4   8   7   36.40   12.50
   4  -8  -7   42.70   17.00
   4  -8  -7   56.99   16.30
   4  -8  -7   40.30   17.70
  -3   8   7   87.59   15.40
   3  -8  -7  127.19   17.90
   3  -8  -7  109.19   19.30
   3  -8  -7   83.09   17.30
  -2   8   7  270.17   26.70
   2  -8  -7  311.47   28.80
   2  -8  -7  317.07   28.70
   2  -8  -7  354.36   27.10
  -1   8   7  150.78   20.40
   1  -8  -7  136.99   20.20
   1  -8  -7  162.78   20.00
   1  -8  -7  142.19   18.80
   0   8   7  120.79   18.00
   0  -8  -7  113.79   16.30
   0  -8  -7   94.39   13.60
   0  -8  -7  116.99   15.30
   1   8   7 1188.98   62.99
  -1  -8  -7 1098.89   60.79
  -1  -8  -7 1114.99   61.59
  -1  -8  -7 1165.48   60.59
   2   8   7 1826.02   89.89
  -2  -8  -7 1668.53   86.79
  -2  -8  -7 1705.43   88.79
  -2  -8  -7 1701.43   86.79
   3   8   7  376.86   30.70
   3   8   7  401.26   28.80
   4   8   7  134.89   17.50
   4   8   7  135.99   20.30
   4   8   7  142.19   12.70
   4   8   7  118.49   18.20
  -4  -8  -7  127.29   14.60
  -4  -8  -7  142.49   16.30
  -4  -8  -7  138.49   14.20
   5   8   7  884.81   47.80
   5   8   7  893.41   50.89
   5   8   7  960.20   51.89
   5   8   7  898.81   56.19
   5   8   7  851.71   51.19
   5   8   7  912.91   47.60
  -5  -8  -7  910.21   47.00
  -5  -8  -7  823.12   46.50
  -5  -8  -7  878.01   52.59
  -5  -8  -7  891.61   47.60
  -5  -8  -7  900.21   51.39
  -5  -8  -7  896.11   48.00
   6   8   7   71.19   17.30
   6   8   7   58.59   11.70
   6   8   7   56.99   12.40
   6   8   7   82.29   15.80
   6   8   7   86.39   12.10
   6   8   7   76.49   10.00
  -6  -8  -7   79.49   13.90
  -6  -8  -7   87.39   13.50
  -6  -8  -7   62.79   10.70
  -6  -8  -7   77.89   11.00
  -6  -8  -7   79.89   11.90
  -6  -8  -7   71.29   10.70
   7   8   7  274.97   30.30
   7   8   7  328.57   25.50
   7   8   7  323.67   37.20
   7   8   7  316.27   28.60
   7   8   7  320.07   23.00
   7   8   7  326.87   25.40
  -7  -8  -7  318.37   27.90
  -7  -8  -7  320.47   23.50
  -7  -8  -7  309.87   26.30
  -7  -8  -7  321.77   25.50
  -7  -8  -7  293.57   23.60
  -7  -8  -7  346.67   23.60
   8   8   7  116.29   17.40
   8   8   7   72.49   23.70
   8   8   7   90.69   19.60
   8   8   7   85.49   15.00
   8   8   7  113.59   14.60
   8   8   7   96.59   16.40
  -8  -8  -7  107.79   13.90
  -8  -8  -7   84.59   15.50
  -8  -8  -7  120.59   17.80
  -8  -8  -7  103.99   17.80
  -8  -8  -7  108.39   13.70
  -8  -8  -7   75.39   13.20
   9   8   7   29.10   23.60
   9   8   7   33.20    9.50
   9   8   7   29.40    9.60
   9   8   7   26.90   17.70
   9   8   7   25.70   12.50
   9   8   7   39.20   14.40
  -9  -8  -7   39.90   11.30
  -9  -8  -7   32.30   17.00
  -9  -8  -7   22.40   13.90
  -9  -8  -7   23.10   10.10
  -9  -8  -7   27.70   10.40
  -9  -8  -7   39.80   12.20
  10   8   7    6.10   16.70
  10   8   7   14.70   11.70
  10   8   7    4.30    8.20
  10   8   7   18.30    9.40
  10   8   7   11.40   21.60
 -10  -8  -7    9.30    9.40
 -10  -8  -7    6.10    7.90
 -10  -8  -7   12.00   16.60
 -10  -8  -7   12.70    9.20
 -10  -8  -7   11.70   10.90
  11   8   7   66.09   28.20
  11   8   7   40.70   19.40
  11   8   7   42.60   14.40
 -11  -8  -7   57.99   20.50
 -11  -8  -7   54.49   14.40
  12   8   7   41.30   21.30
  12   8   7   44.20   28.30
  12   8   7   10.60   14.00
 -12  -8  -7   20.50   13.50
 -12  -8  -7    2.00   19.90
  13   8   7  238.58   33.20
  13   8   7  148.79   38.80
  13   8   7  140.59   33.10
 -13  -8  -7  162.18   31.20
 -13  -8  -7  185.38   27.50
   7  -9  -8   62.29   24.50
   7  -9  -8   54.19   23.10
   7  -9  -8   45.00   21.00
   6  -9  -8   77.29   24.50
   6  -9  -8   64.29   21.20
   6  -9  -8   32.30   20.60
   5  -9  -8   -1.10   17.20
   5  -9  -8    3.70   15.80
   5  -9  -8  -19.70   15.30
  -4   9   8  156.88   24.70
   4  -9  -8  225.38   30.10
   4  -9  -8  161.18   23.90
   4  -9  -8  229.38   33.60
  -3   9   8  772.22   51.99
   3  -9  -8  868.01   57.09
   3  -9  -8  943.11   54.39
  -2   9   8  878.41   50.49
   2  -9  -8  776.72   51.39
   2  -9  -8  670.93   49.60
   2  -9  -8  806.92   49.20
  -1   9   8   39.50   12.60
   1  -9  -8   22.50   12.40
   1  -9  -8   32.80   11.80
   1  -9  -8   16.80   10.90
   0   9   8  514.55   36.10
   0  -9  -8  456.85   33.80
   0  -9  -8  506.95   33.70
   0  -9  -8  475.35   34.20
   1   9   8   66.89   12.70
  -1  -9  -8   66.09   12.70
  -1  -9  -8   65.09   11.60
  -1  -9  -8   65.19   12.30
   2   9   8  644.84   42.40
  -2  -9  -8  674.23   39.40
  -2  -9  -8  692.83   40.20
  -2  -9  -8  643.94   41.10
   3   9   8 1159.58   63.99
  -3  -9  -8 1151.98   60.29
  -3  -9  -8 1074.79   59.89
  -3  -9  -8 1150.98   63.09
   4   9   8  459.05   34.30
   4   9   8  412.86   32.50
   4   9   8  452.65   36.30
  -4  -9  -8  485.45   32.50
  -4  -9  -8  471.05   29.30
  -4  -9  -8  452.35   29.40
   5   9   8    0.10    5.30
   5   9   8    2.60    9.70
   5   9   8    0.60   11.20
   5   9   8   -7.00   10.40
   5   9   8   -7.90    9.20
  -5  -9  -8   -0.90    5.90
  -5  -9  -8   -3.90    7.60
  -5  -9  -8   -5.50    7.50
  -5  -9  -8    1.60    6.80
  -5  -9  -8   -1.60    6.70
   6   9   8  120.09   14.40
   6   9   8  109.09   16.60
   6   9   8  154.08   17.30
   6   9   8  142.39   22.10
   6   9   8  116.49   21.10
  -6  -9  -8  154.28   16.90
  -6  -9  -8  155.08   18.30
  -6  -9  -8  147.59   21.30
  -6  -9  -8  135.19   16.10
  -6  -9  -8  105.79   13.80
  -6  -9  -8  119.39   17.00
   7   9   8  394.36   30.30
   7   9   8  341.57   27.50
   7   9   8  340.47   24.30
   7   9   8  400.86   34.20
   7   9   8  332.77   30.80
   7   9   8  316.97   39.00
  -7  -9  -8  330.57   26.20
  -7  -9  -8  382.06   28.80
  -7  -9  -8  339.07   25.70
  -7  -9  -8  326.37   30.30
  -7  -9  -8  339.57   27.30
  -7  -9  -8  323.47   25.40
   8   9   8  218.58   28.80
   8   9   8  228.98   38.50
   8   9   8  154.68   25.10
   8   9   8  221.68   20.20
   8   9   8  212.88   24.20
   8   9   8  218.48   24.40
  -8  -9  -8  222.88   23.40
  -8  -9  -8  187.18   22.30
  -8  -9  -8  220.48   26.20
  -8  -9  -8  203.28   27.90
  -8  -9  -8  225.58   21.10
  -8  -9  -8  218.88   21.90
   9   9   8  762.22   45.30
   9   9   8  693.33   65.29
   9   9   8  773.92   48.70
   9   9   8  743.93   52.19
   9   9   8  731.63   46.60
   9   9   8  758.22   55.69
  -9  -9  -8  812.32   46.30
  -9  -9  -8  755.32   53.19
  -9  -9  -8  807.92   50.69
  -9  -9  -8  735.03   45.50
  -9  -9  -8  779.32   45.80
  -9  -9  -8  749.03   49.70
  10   9   8  582.04   50.39
  10   9   8  640.44   42.70
  10   9   8  602.44   37.80
  10   9   8  543.95   38.70
  10   9   8  590.54   62.29
 -10  -9  -8  560.64   44.40
 -10  -9  -8  571.44   42.20
 -10  -9  -8  582.24   38.90
 -10  -9  -8  577.54   37.90
 -10  -9  -8  555.64   38.50
  11   9   8   53.69   21.10
  11   9   8   84.39   30.00
  11   9   8   60.29   15.40
 -11  -9  -8   63.49   20.00
 -11  -9  -8   47.90   13.40
 -11  -9  -8   39.30   13.60
  12   9   8  150.08   31.10
  12   9   8  216.78   29.10
  12   9   8  149.39   37.60
 -12  -9  -8  137.09   20.10
 -12  -9  -8  155.28   28.00
 -12  -9  -8  165.58   24.70
  13   9   8  159.28   33.20
  13   9   8  242.98   33.10
  13   9   8  150.08   40.30
 -13  -9  -8  144.49   23.10
 -13  -9  -8  123.09   28.80
 -13  -9  -8  174.38   25.60
   6 -10  -9    6.00   19.40
   6 -10  -9   -1.80   18.90
   6 -10  -9   18.40   21.60
   5 -10  -9  144.39   25.80
   5 -10  -9  175.98   30.10
   5 -10  -9  113.59   26.40
  -4  10   9   37.10   17.30
   4 -10  -9  103.09   20.00
   4 -10  -9   70.49   21.00
   4 -10  -9   34.60   17.40
  -3  10   9   84.79   17.70
   3 -10  -9  125.69   23.70
   3 -10  -9  146.59   22.30
   3 -10  -9   72.09   19.00
  -2  10   9  274.57   29.10
   2 -10  -9  201.48   29.80
   2 -10  -9  287.67   28.80
   2 -10  -9  261.97   31.00
  -1  10   9  112.39   17.90
   1 -10  -9  103.09   17.60
   1 -10  -9  137.39   20.10
   1 -10  -9   83.89   16.70
   0  10   9  -14.30   11.10
   0 -10  -9   12.50   11.10
   0 -10  -9    1.80   11.30
   0 -10  -9   -3.30   10.80
   1  10   9  206.58   25.70
  -1 -10  -9  162.58   22.30
  -1 -10  -9  215.38   22.60
  -1 -10  -9  198.28   22.20
   2  10   9   75.69   15.10
  -2 -10  -9   97.09   14.90
  -2 -10  -9  101.19   15.10
  -2 -10  -9   81.09   15.90
   3  10   9   83.69   15.90
  -3 -10  -9  110.09   15.10
  -3 -10  -9  121.59   15.90
  -3 -10  -9   79.49   14.50
   4  10   9  250.47   28.90
  -4 -10  -9  263.37   23.10
  -4 -10  -9  274.17   23.20
  -4 -10  -9  269.37   25.30
   5  10   9  729.63   40.10
   5  10   9  718.13   46.50
   5  10   9  719.83   49.50
  -5 -10  -9  664.03   41.40
  -5 -10  -9  665.53   41.10
  -5 -10  -9  727.23   45.50
   6  10   9 1185.38   89.19
   6  10   9 1149.98   66.19
   6  10   9 1116.09   58.99
   6  10   9 1153.18   59.09
   6  10   9 1119.99   65.29
  -6 -10  -9 1102.59   59.69
  -6 -10  -9 1062.19   58.59
  -6 -10  -9 1008.40   65.59
  -6 -10  -9 1127.79   64.39
  -6 -10  -9 1081.79   59.89
   7  10   9  485.15   39.10
   7  10   9  517.15   39.00
   7  10   9  524.25   33.70
   7  10   9  527.25   31.80
   7  10   9  501.75   46.50
   7  10   9  437.76   40.10
  -7 -10  -9  507.45   33.10
  -7 -10  -9  501.15   36.80
  -7 -10  -9  421.76   38.70
  -7 -10  -9  478.75   34.00
  -7 -10  -9  542.25   33.60
  -7 -10  -9  485.15   33.20
   8  10   9 1089.79   66.59
   8  10   9 1101.59   63.99
   8  10   9 1095.89   77.39
   8  10   9 1123.99   61.69
   8  10   9 1026.30   67.49
   8  10   9 1150.88   59.89
  -8 -10  -9 1052.79   64.19
  -8 -10  -9 1065.89   60.49
  -8 -10  -9 1066.59   61.89
  -8 -10  -9 1073.79   60.29
  -8 -10  -9 1100.69   60.09
  -8 -10  -9 1096.19   67.49
   9  10   9   91.89   13.20
   9  10   9   90.99   18.90
   9  10   9  108.69   21.90
   9  10   9   47.70   14.30
   9  10   9   88.39   26.20
   9  10   9  111.09   16.50
  -9 -10  -9   98.29   17.30
  -9 -10  -9   88.09   14.60
  -9 -10  -9   66.09   14.00
  -9 -10  -9   91.39   18.90
  -9 -10  -9   83.19   14.10
  -9 -10  -9   78.49   13.80
  10  10   9  186.58   29.40
  10  10   9  212.18   28.40
  10  10   9  192.08   25.80
  10  10   9  211.38   39.20
  10  10   9  282.67   27.40
 -10 -10  -9  221.38   23.70
 -10 -10  -9  213.78   25.60
 -10 -10  -9  228.38   24.40
 -10 -10  -9  235.88   24.00
 -10 -10  -9  259.97   31.30
  11  10   9  514.25   60.69
  11  10   9  551.24   41.40
  11  10   9  456.75   49.40
 -11 -10  -9  489.85   36.90
 -11 -10  -9  482.35   37.20
 -11 -10  -9  514.05   44.90
  12  10   9   58.59   23.10
  12  10   9   56.99   28.50
  12  10   9   59.69   17.20
 -12 -10  -9   30.40   14.70
 -12 -10  -9   21.00   13.10
 -12 -10  -9   29.00   20.50
  13  10   9   55.89   30.70
 -13 -10  -9   21.30   22.30
 -13 -10  -9   37.20   14.90
   5 -11 -10  -13.20   19.40
   5 -11 -10    2.90   19.10
   5 -11 -10   25.70   21.50
   4 -11 -10   61.19   23.70
   4 -11 -10   30.50   20.60
   4 -11 -10   45.10   20.40
  -3  11  10   13.20   14.20
   3 -11 -10   23.60   17.60
   3 -11 -10   16.60   16.40
   3 -11 -10    0.20   16.00
  -2  11  10   23.30   14.90
   2 -11 -10   35.60   17.70
   2 -11 -10   -9.60   15.20
   2 -11 -10   48.20   16.80
  -1  11  10  117.19   19.70
   1 -11 -10  141.29   21.80
   1 -11 -10  138.19   20.60
   1 -11 -10   82.09   18.50
   0  11  10    7.70   13.40
   0 -11 -10   26.50   14.60
   0 -11 -10    3.70   12.40
   0 -11 -10   11.70   13.50
   1  11  10   -7.60   12.60
  -1 -11 -10    3.50   11.10
  -1 -11 -10   -1.70   12.00
  -1 -11 -10  -17.60   10.50
   2  11  10  258.87   31.20
  -2 -11 -10  233.28   27.20
  -2 -11 -10  276.87   25.90
  -2 -11 -10  255.47   25.70
   3  11  10  884.11   55.49
  -3 -11 -10  875.11   50.59
  -3 -11 -10  818.52   50.09
  -3 -11 -10  787.02   52.19
   4  11  10  624.04   45.80
  -4 -11 -10  635.74   39.70
  -4 -11 -10  642.64   43.20
  -4 -11 -10  603.54   39.40
   5  11  10   46.10   18.30
   5  11  10   61.59   14.60
  -5 -11 -10   29.80   11.20
  -5 -11 -10   48.30   12.20
  -5 -11 -10   35.30   10.60
   6  11  10  962.00   62.29
   6  11  10  969.00   60.39
   6  11  10  962.10   53.09
  -6 -11 -10  950.20   61.69
  -6 -11 -10  942.31   54.59
  -6 -11 -10 1029.80   59.59
  -6 -11 -10  941.91   53.89
   7  11  10  459.55   32.50
   7  11  10  440.76   39.40
   7  11  10  434.16   29.80
   7  11  10  484.05   39.60
  -7 -11 -10  444.86   32.00
  -7 -11 -10  421.16   35.30
  -7 -11 -10  445.76   38.80
  -7 -11 -10  451.75   31.70
   8  11  10   -8.50   13.10
   8  11  10   -8.60   15.00
   8  11  10   -1.10    6.60
   8  11  10  -14.90   12.70
  -8 -11 -10   -1.70    9.40
  -8 -11 -10   -3.90    7.90
  -8 -11 -10  -14.20   10.60
  -8 -11 -10    0.60   12.20
   9  11  10   29.30   14.80
   9  11  10   62.19   12.00
   9  11  10   47.70   17.80
  -9 -11 -10   59.19   13.70
  -9 -11 -10   55.89   20.80
  -9 -11 -10   48.00   12.80
  -9 -11 -10   39.80   15.00
  -9 -11 -10   53.99   17.70
  10  11  10   -3.60   12.60
  10  11  10   33.50   23.10
  10  11  10   -1.30   24.00
 -10 -11 -10   -2.60   19.00
 -10 -11 -10   14.30   10.50
 -10 -11 -10   15.70   15.20
 -10 -11 -10    5.60   12.90
  11  11  10   62.59   27.70
  11  11  10   43.20   20.80
 -11 -11 -10   36.60   18.40
 -11 -11 -10    5.20   13.60
  12  11  10   27.10   25.10
  12  11  10   22.80   20.60
 -12 -11 -10    6.00   18.40
 -12 -11 -10   -3.10   13.10
   4 -12 -11   11.60   20.10
   4 -12 -11  -19.30   19.50
  -3  12  11    0.60   16.10
   3 -12 -11   15.10   18.60
   3 -12 -11  -13.90   17.00
  -2  12  11   84.29   19.90
   2 -12 -11  109.59   21.60
   2 -12 -11   56.39   20.40
  -1  12  11  151.98   23.10
   1 -12 -11   87.59   20.30
   0  12  11   -7.70   14.70
   0 -12 -11  -13.10   12.50
   0 -12 -11   21.30   16.00
   1  12  11  542.05   43.30
  -1 -12 -11  610.74   41.00
  -1 -12 -11  396.76   39.00
   2  12  11  513.65   42.90
  -2 -12 -11  494.85   37.90
   3  12  11   84.59   18.80
  -3 -12 -11   71.99   15.70
  -3 -12 -11   63.39   14.30
   4  12  11   87.99   19.20
  -4 -12 -11   92.19   16.80
  -4 -12 -11  106.09   16.50
   5  12  11   25.90   14.70
  -5 -12 -11   23.60   12.50
  -5 -12 -11   20.70   10.50
   6  12  11  305.37   33.30
   6  12  11  171.78   27.50
  -6 -12 -11  278.37   32.30
  -6 -12 -11  269.07   25.00
  -6 -12 -11  228.78   27.80
   7  12  11  531.85   43.90
   7  12  11  508.85   33.10
   7  12  11  471.25   44.80
  -7 -12 -11  528.25   36.10
  -7 -12 -11  516.55   39.80
  -7 -12 -11  516.05   43.20
   8  12  11   68.49   12.50
   8  12  11   38.60   17.60
   8  12  11   37.50   17.10
  -8 -12 -11   55.99   17.50
  -8 -12 -11   49.00   13.50
  -8 -12 -11   62.99   14.20
   9  12  11  -25.60   14.30
   9  12  11  -21.80   15.60
   9  12  11    8.70    8.60
  -9 -12 -11    6.20   15.30
  -9 -12 -11    0.10    9.80
  -9 -12 -11    5.10   11.10
  10  12  11   -9.40   14.70
  10  12  11    1.10   18.70
 -10 -12 -11    7.40   10.30
 -10 -12 -11   -8.10   15.90
  -3  13  12   75.99   27.60
  -2  13  12  -17.40   16.10
   2 -13 -12  -32.30   15.90
   2 -13 -12   -9.50   17.10
  -1  13  12  109.69   22.90
   1 -13 -12   56.79   20.30
   1 -13 -12  129.59   24.00
   0  13  12  286.67   36.70
   0 -13 -12  314.17   34.80
   1  13  12   43.70   18.40
  -1 -13 -12   53.39   18.00
  -1 -13 -12    1.50   15.20
   2  13  12    9.40   16.30
  -2 -13 -12  -15.90   12.50
  -2 -13 -12    5.40   14.40
   3  13  12   68.19   19.90
  -3 -13 -12   45.80   15.70
  -3 -13 -12   72.89   16.50
   4  13  12  -17.30   14.80
  -4 -13 -12   -6.00   11.30
  -4 -13 -12   -1.40   11.60
   5  13  12   27.70   16.80
  -5 -13 -12   51.19   14.70
  -5 -13 -12   32.70   14.10
   6  13  12   39.40   17.00
  -6 -13 -12   25.50   11.60
  -6 -13 -12   29.40   14.60
  -6 -13 -12   27.40   13.50
   7  13  12  113.59   26.60
   7  13  12  211.48   34.30
  -7 -13 -12  166.08   26.20
  -7 -13 -12  188.08   31.40
  -7 -13 -12  183.68   23.20
   8  13  12   42.60   19.20
   8  13  12   28.00   21.20
  -8 -13 -12   38.80   17.10
  -8 -13 -12   44.70   15.30
  -8 -13 -12   56.99   14.50
   9  13  12  246.48   31.90
   9  13  12  178.58   27.80
   9  13  12  240.48   40.40
  -9 -13 -12  240.98   30.10
  -9 -13 -12  248.08   36.60
  -9 -13 -12  265.37   28.70
  10  13  12   57.69   20.90
  10  13  12   86.69   24.70
 -10 -13 -12   91.89   24.60
 -10 -13 -12  103.89   19.00
  -1  14  13  -15.60   17.60
   1 -14 -13  -13.50   17.20
   1 -14 -13  -33.90   15.60
   0  14  13  -20.10   16.90
   0 -14 -13   -4.90   16.70
   0 -14 -13  -32.50   15.40
   1  14  13  -14.30   16.60
  -1 -14 -13  -28.10   14.20
  -1 -14 -13  -27.30   15.70
   2  14  13   47.70   20.30
  -2 -14 -13   37.50   17.40
  -2 -14 -13   17.60   17.40
   3  14  13   30.50   19.30
  -3 -14 -13    7.70   15.30
  -3 -14 -13   47.40   16.30
   4  14  13  -19.70   16.20
  -4 -14 -13   -7.00   12.40
  -4 -14 -13   -3.90   12.90
   5  14  13  -17.00   16.80
  -5 -14 -13  -11.60   12.50
  -5 -14 -13   -7.80   12.20
   6  14  13   64.49   21.00
  -6 -14 -13   78.59   20.50
  -6 -14 -13   51.59   17.10
  -6 -14 -13   78.99   16.90
   7  14  13  477.95   46.90
  -7 -14 -13  398.66   40.30
  -7 -14 -13  458.75   35.40
  -7 -14 -13  462.75   44.40
   8  14  13  180.38   28.00
   8  14  13  109.29   29.50
  -8 -14 -13  135.59   23.40
  -8 -14 -13  201.28   33.50
  -8 -14 -13  198.78   26.10
   9  14  13   26.60   21.80
   9  14  13   12.00   22.50
  -9 -14 -13   39.60   20.80
  -9 -14 -13   46.00   17.10
  10  14  13   74.09   25.10
   2  15  14   46.70   22.20
  -2 -15 -14   68.29   21.30
  -2 -15 -14    3.90   17.30
   3  15  14  176.48   29.40
  -3 -15 -14  241.48   31.80
   4  15  14  110.09   24.50
  -4 -15 -14   77.69   18.80
  -4 -15 -14   36.50   17.70
   5  15  14   31.00   21.90
  -5 -15 -14   64.89   17.60
  -5 -15 -14   85.79   22.90
  -5 -15 -14   34.40   18.70
   6  15  14  307.77   42.40
  -6 -15 -14  284.37   30.90
  -6 -15 -14  297.17   38.70
  -6 -15 -14  206.88   33.90
   7  15  14   95.29   25.20
  -7 -15 -14   99.99   18.70
  -7 -15 -14   58.19   18.70
  -7 -15 -14   99.99   23.30
   8  15  14    1.90   21.20
  -8 -15 -14   10.70   14.30
  -8 -15 -14   -4.60   14.70
  -7 -14 -16  315.27   36.10
   7  14  16  324.77   39.90
   7  14  16  228.18   35.50
  -6 -14 -16  383.96   38.60
   6  14  16  392.56   42.20
   6  14  16  256.47   38.70
  -5 -14 -16   19.00   14.30
  -5 -14 -16   14.30   14.50
   5  14  16   28.70   18.90
  -4 -14 -16  113.19   20.80
  -4 -14 -16   83.59   19.90
   4  14  16  100.79   23.00
  -3 -14 -16  605.74   47.00
   3  14  16  582.14   51.59
  -2 -14 -16  230.78   35.10
  -2 -14 -16  374.76   37.20
   2  14  16  360.66   42.00
  -1 -14 -16   69.09   20.40
  -1 -14 -16  111.69   22.60
   1  14  16   57.79   22.30
  -9 -13 -15   75.49   18.20
  -9 -13 -15   79.59   20.50
   9  13  15   60.79   21.40
   9  13  15   44.00   19.80
  -8 -13 -15  431.66   40.10
  -8 -13 -15  442.56   41.50
   8  13  15  330.67   42.50
   8  13  15  432.26   42.80
  -7 -13 -15   93.09   18.40
   7  13  15   52.99   21.10
   7  13  15   95.79   19.50
  -6 -13 -15    2.20   12.00
  -6 -13 -15    1.90   12.90
   6  13  15   -7.60   14.10
   6  13  15  -23.50   19.50
  -5 -13 -15   32.80   14.10
  -5 -13 -15   35.50   15.00
   5  13  15   -9.00   19.60
   5  13  15   33.10   17.20
  -4 -13 -15   16.50   13.90
  -4 -13 -15   -1.00   12.00
   4  13  15    7.90   15.00
  -3 -13 -15   57.39   18.30
  -3 -13 -15   98.99   19.00
   3  13  15   69.09   19.90
  -2 -13 -15    4.00   13.80
  -2 -13 -15  -15.90   12.80
   2  13  15   -0.40   15.60
  -1 -13 -15  -18.20   12.50
  -1 -13 -15    3.70   14.30
   1  13  15   -1.00   15.70
   0 -13 -15  -27.00   13.50
   0 -13 -15  -10.90   15.70
   0  13  15  -27.20   15.30
   1 -13 -15  -15.00   16.60
   1 -13 -15  -28.30   13.90
  -1  13  15  -26.40   15.40
   2 -13 -15   27.20   20.80
   2 -13 -15  -21.80   17.40
  -2  13  15    1.80   17.90
 -10 -12 -14  147.19   23.70
  10  12  14  153.48   24.20
  -9 -12 -14  245.18   31.00
  -9 -12 -14  254.57   34.30
   9  12  14  172.98   25.70
   9  12  14  252.47   37.40
  -8 -12 -14   36.20   15.30
  -8 -12 -14   19.80   12.00
   8  12  14  -15.20   14.50
   8  12  14    9.20   14.60
  -7 -12 -14   37.60   13.20
   7  12  14   20.20   13.50
   7  12  14   23.60   17.40
  -6 -12 -14   31.70   12.10
  -6 -12 -14   39.70   11.70
   6  12  14   19.20   13.70
   6  12  14   24.70   17.00
  -5 -12 -14    5.90   10.50
  -5 -12 -14   17.20   11.60
   5  12  14   -4.20   16.70
   5  12  14   -6.40   12.90
  -4 -12 -14   91.99   17.10
  -4 -12 -14   97.49   17.10
   4  12  14   47.10   20.80
   4  12  14   68.89   17.40
  -3 -12 -14   84.89   16.30
  -3 -12 -14   63.59   15.30
   3  12  14   71.59   16.90
  -2 -12 -14  198.18   26.70
  -2 -12 -14  133.79   20.90
   2  12  14  181.18   30.30
  -1 -12 -14  -14.10   11.30
  -1 -12 -14   -8.40   13.00
   1  12  14   -4.20   13.70
   0 -12 -14   31.40   14.90
   0 -12 -14   46.90   16.00
   0  12  14   48.50   17.40
   1 -12 -14   32.50   17.00
   1 -12 -14   23.80   17.20
  -1  12  14   26.10   16.70
   2 -12 -14   61.09   19.90
   2 -12 -14   31.90   17.60
  -2  12  14   44.10   18.10
   3 -12 -14  201.88   29.40
   3 -12 -14  126.19   26.10
  -3  12  14  185.38   32.60
 -11 -11 -13   72.39   18.20
 -11 -11 -13   39.20   14.80
  11  11  13   20.10   14.40
  11  11  13   97.99   31.00
 -10 -11 -13   64.59   15.90
 -10 -11 -13   26.40   13.00
  10  11  13   53.49   24.50
  10  11  13   14.60   13.30
  -9 -11 -13   13.20   11.50
  -9 -11 -13   -0.50    9.10
   9  11  13   23.30   21.30
   9  11  13  -13.00   11.60
  -8 -11 -13  112.69   19.30
  -8 -11 -13  165.28   25.00
  -8 -11 -13  150.28   20.30
   8  11  13   99.09   18.50
   8  11  13  102.49   18.90
  -7 -11 -13  200.38   25.40
   7  11  13  214.68   27.20
   7  11  13  218.38   29.20
  -6 -11 -13    6.10    8.80
  -6 -11 -13    3.30    8.80
   6  11  13   -0.50   13.10
   6  11  13    5.50   11.30
  -5 -11 -13  104.39   14.30
  -5 -11 -13   86.39   15.50
   5  11  13   87.19   16.10
   5  11  13   90.19   18.80
  -4 -11 -13   24.50   11.70
  -4 -11 -13   19.90   10.50
   4  11  13    0.90   15.90
   4  11  13    5.40   12.30
  -3 -11 -13  151.38   19.30
  -3 -11 -13  182.98   23.60
   3  11  13  131.19   20.10
  -2 -11 -13  994.80   58.99
  -2 -11 -13  986.40   61.49
   2  11  13 1027.70   63.09
  -1 -11 -13  509.25   40.90
  -1 -11 -13  612.34   41.30
   1  11  13  546.45   43.00
   0 -11 -13   -9.30   10.80
   0 -11 -13    3.50   12.90
   0  11  13   -4.30   13.00
   1 -11 -13  403.56   37.10
   1 -11 -13  462.75   38.10
  -1  11  13  424.66   38.60
   2 -11 -13  423.96   38.10
   2 -11 -13  323.47   34.70
  -2  11  13  348.97   36.10
   3 -11 -13   87.49   22.20
   3 -11 -13   41.40   19.20
  -3  11  13   71.89   18.60
   4 -11 -13    3.50   19.70
   4 -11 -13  -28.20   17.40
  -4  11  13   -2.60   15.00
   5 -11 -13    6.80   21.70
   5 -11 -13   61.39   22.80
  12  10  12   39.80   26.20
 -11 -10 -12   17.60   12.40
 -11 -10 -12   46.80   17.60
 -11 -10 -12   21.60   12.50
  11  10  12   19.20   12.50
  11  10  12   82.49   28.60
  11  10  12   34.50   19.50
 -10 -10 -12   74.79   18.40
 -10 -10 -12   87.29   18.00
 -10 -10 -12   48.60   15.10
  10  10  12   92.49   28.60
  10  10  12   53.79   14.90
  -9 -10 -12  206.58   26.30
  -9 -10 -12  218.48   23.60
   9  10  12  169.98   34.40
   9  10  12  152.78   24.50
  -8 -10 -12    2.30    7.90
  -8 -10 -12    4.50    9.30
  -8 -10 -12   12.80   10.40
   8  10  12   -7.70    9.70
   8  10  12    8.60   15.30
   8  10  12   -6.20   10.40
  -7 -10 -12  143.19   21.10
  -7 -10 -12  171.78   19.00
   7  10  12   95.39   16.40
   7  10  12  133.39   22.40
   7  10  12  127.79   24.90
  -6 -10 -12  442.86   36.30
  -6 -10 -12  450.45   30.90
   6  10  12  490.85   37.70
   6  10  12  477.55   36.40
   6  10  12  496.55   44.50
  -5 -10 -12  480.75   37.50
  -5 -10 -12  463.05   32.30
   5  10  12  609.54   60.59
   5  10  12  515.55   39.80
   5  10  12  520.05   38.10
  -4 -10 -12  148.79   19.10
  -4 -10 -12  152.88   21.10
   4  10  12   90.29   18.20
   4  10  12  154.18   23.60
  -3 -10 -12  413.16   30.70
  -3 -10 -12  408.46   33.30
   3  10  12  431.86   35.10
   3  10  12  424.36   39.60
  -2 -10 -12   36.50   12.60
  -2 -10 -12   36.80   12.10
   2  10  12   37.20   13.10
  -1 -10 -12   39.70   13.60
  -1 -10 -12   40.30   12.40
   1  10  12   32.50   13.40
   0 -10 -12   25.00   13.50
   0 -10 -12   22.30   11.90
   0  10  12    8.30   11.90
   1 -10 -12    6.60   12.20
   1 -10 -12    3.40   11.80
  -1  10  12    4.50   12.70
   2 -10 -12    2.10   13.10
   2 -10 -12  -17.60   12.10
  -2  10  12   -2.10   12.20
   3 -10 -12   64.99   17.80
   3 -10 -12   39.20   16.60
  -3  10  12   50.99   15.50
   4 -10 -12   22.30   17.80
   4 -10 -12   54.49   20.20
  -4  10  12   45.60   15.80
   5 -10 -12  -25.30   15.90
   5 -10 -12  -21.60   16.70
  -5  10  12   -4.60   16.80
   6 -10 -12   71.79   23.50
   6 -10 -12   57.49   22.70
 -12  -9 -11    8.70   17.20
 -12  -9 -11    4.70   11.10
  12   9  11   24.10   25.70
  12   9  11   25.90   19.40
 -11  -9 -11  205.88   23.80
 -11  -9 -11  200.88   30.00
 -11  -9 -11  181.48   27.70
  11   9  11  174.18   30.40
  11   9  11  191.48   40.20
  11   9  11  159.48   24.20
 -10  -9 -11  283.57   31.20
 -10  -9 -11  288.97   26.00
 -10  -9 -11  295.97   30.40
  10   9  11  295.37   47.60
  10   9  11  282.07   36.40
  10   9  11  238.48   27.50
  -9  -9 -11  108.69   15.20
  -9  -9 -11  104.89   18.80
  -9  -9 -11  130.69   22.00
   9   9  11   81.59   15.80
   9   9  11  144.59   32.30
   9   9  11  140.69   23.60
  -8  -9 -11  769.32   43.30
  -8  -9 -11  704.33   48.00
  -8  -9 -11  731.33   45.40
  -8  -9 -11  751.22   50.89
   8   9  11  713.73   47.20
   8   9  11  798.52   63.29
   8   9  11  743.43   47.30
   8   9  11  760.92   52.49
  -7  -9 -11  247.18   25.30
  -7  -9 -11  262.87   20.40
  -7  -9 -11  226.58   20.20
   7   9  11  240.68   18.40
   7   9  11  220.78   28.60
   7   9  11  220.98   24.60
   7   9  11  216.28   24.50
   7   9  11  194.38   32.50
  -6  -9 -11  404.96   31.90
  -6  -9 -11  385.96   26.20
   6   9  11  330.77   30.40
   6   9  11  414.46   40.00
   6   9  11  376.16   31.50
  -5  -9 -11 1201.88   63.59
  -5  -9 -11 1187.38   69.49
   5   9  11 1281.47   75.59
   5   9  11 1194.08   68.29
   5   9  11 1186.98   67.79
  -4  -9 -11  867.91   53.39
  -4  -9 -11  879.61   48.60
   4   9  11  877.71   53.89
   4   9  11  858.41   52.49
   4   9  11  872.71   56.59
  -3  -9 -11  135.89   19.00
  -3  -9 -11  165.28   17.60
   3   9  11  115.89   19.40
   3   9  11  104.89   18.20
   3   9  11  152.58   21.50
  -2  -9 -11  300.87   24.30
  -2  -9 -11  269.57   25.20
   2   9  11  299.37   32.80
   2   9  11  262.87   32.90
   2   9  11  289.67   27.20
  -1  -9 -11  228.98   22.40
  -1  -9 -11  238.28   23.00
   1   9  11  222.38   24.70
   0  -9 -11   -9.90    9.70
   0  -9 -11    2.30    9.10
   0   9  11   -4.10    9.40
   1  -9 -11  627.34   41.80
   1  -9 -11  567.84   40.70
   1  -9 -11  642.24   41.60
  -1   9  11  625.84   43.30
   2  -9 -11 1503.65   85.99
   2  -9 -11 1652.93   86.59
   2  -9 -11 1582.94   86.99
  -2   9  11 1595.34   87.19
   3  -9 -11  167.68   22.90
   3  -9 -11  179.18   22.90
   3  -9 -11  119.19   20.40
  -3   9  11  146.09   24.70
   4  -9 -11   10.20   14.20
   4  -9 -11   -5.40   14.60
   4  -9 -11   -4.00   14.50
  -4   9  11    6.90   12.60
   5  -9 -11   83.69   22.30
   5  -9 -11  131.39   23.90
   5  -9 -11   68.79   20.10
  -5   9  11   52.09   16.20
   6  -9 -11  -20.70   17.10
   6  -9 -11   -4.40   17.30
   6  -9 -11  -22.10   16.20
   7  -9 -11   97.49   24.80
   7  -9 -11   33.90   20.10
   7  -9 -11   94.59   25.70
 -12  -8 -10   78.69   22.60
 -12  -8 -10   54.09   15.40
  12   8  10   77.89   24.40
  12   8  10   71.19   30.30
 -11  -8 -10   87.59   16.00
 -11  -8 -10  108.89   21.80
  11   8  10   86.29   24.00
  11   8  10   66.09   15.00
  11   8  10  143.29   37.60
 -10  -8 -10  774.42   46.80
 -10  -8 -10  781.72   51.39
 -10  -8 -10  787.92   54.09
 -10  -8 -10  694.03   47.10
  10   8  10  755.82   58.29
  10   8  10  755.62   48.20
  10   8  10  807.22   70.79
  -9  -8 -10  646.24   43.10
  -9  -8 -10  608.64   45.80
  -9  -8 -10  631.74   39.40
  -9  -8 -10  654.73   38.80
   9   8  10  579.14   40.70
   9   8  10  650.63   49.70
   9   8  10  615.34   46.50
   9   8  10  599.04   60.99
  -8  -8 -10   88.89   15.30
  -8  -8 -10  114.19   13.90
  -8  -8 -10  114.99   17.10
  -8  -8 -10   98.79   17.50
  -8  -8 -10  118.39   16.90
   8   8  10  107.49   27.00
   8   8  10   86.39   19.10
   8   8  10  127.09   18.70
   8   8  10  110.99   15.30
   8   8  10   90.09   14.50
  -7  -8 -10    0.30    6.00
  -7  -8 -10   -8.00    7.00
  -7  -8 -10   -3.60    6.70
  -7  -8 -10   -6.40    6.50
   7   8  10  -11.70    9.90
   7   8  10    9.30    8.40
   7   8  10   -9.60   12.90
   7   8  10   -2.30    4.90
   7   8  10   -3.90    7.80
  -6  -8 -10    2.10    5.80
  -6  -8 -10   12.30    6.90
  -6  -8 -10   -5.90    6.50
   6   8  10   10.50    5.50
   6   8  10    8.30   12.40
   6   8  10   12.70    8.10
   6   8  10    1.20   10.10
   6   8  10    3.10    8.60
  -5  -8 -10   70.29    9.40
  -5  -8 -10   65.29    9.60
  -5  -8 -10   50.69   10.60
   5   8  10   49.00   13.00
   5   8  10   68.99   16.00
   5   8  10   62.69   11.40
   5   8  10   58.19   11.80
  -4  -8 -10  110.59   14.00
  -4  -8 -10  123.09   16.60
   4   8  10  113.39   17.60
   4   8  10  108.49   18.50
   4   8  10  133.69   19.20
  -3  -8 -10 1423.36   76.79
  -3  -8 -10 1411.56   72.29
   3   8  10 1405.06   78.49
   3   8  10 1421.06   76.19
   3   8  10 1377.66   75.29
  -2  -8 -10  872.91   47.80
  -2  -8 -10  902.61   51.29
   2   8  10  851.01   50.59
   2   8  10  862.61   51.79
   2   8  10  859.01   52.39
  -1  -8 -10   13.30    8.60
  -1  -8 -10   12.00    7.30
   1   8  10   22.80    7.90
   1   8  10   14.50    8.50
   0  -8 -10  311.27   24.60
   0  -8 -10  285.17   24.60
   0   8  10  281.27   25.30
   1  -8 -10   51.39   11.70
   1  -8 -10   24.60   11.60
   1  -8 -10   36.10   12.00
  -1   8  10   23.70   10.90
  -1   8  10   42.50   10.20
   2  -8 -10  744.03   45.30
   2  -8 -10  682.03   45.30
   2  -8 -10  703.73   44.90
  -2   8  10  695.23   45.80
   3  -8 -10  883.51   54.19
   3  -8 -10  848.02   54.09
   3  -8 -10  903.21   55.29
  -3   8  10  866.81   53.59
   4  -8 -10  117.99   20.30
   4  -8 -10  137.59   22.00
   4  -8 -10  161.68   22.40
   5  -8 -10   17.70   15.80
   5  -8 -10   24.90   16.50
   5  -8 -10   17.30   15.40
  -5   8  10   15.10   13.10
   6  -8 -10  126.49   23.80
   6  -8 -10  128.39   25.50
   6  -8 -10   91.79   21.60
   7  -8 -10   34.10   19.80
   7  -8 -10   62.49   22.60
   7  -8 -10   40.90   21.80
   8  -8 -10    9.30   21.90
   8  -8 -10    5.10   20.80
   8  -8 -10   45.80   23.90
 -12  -7  -9   56.59   23.00
 -12  -7  -9   51.39   15.10
  12   7   9   54.19   23.10
  12   7   9   58.09   16.80
  12   7   9   86.09   34.20
 -11  -7  -9   80.79   15.50
 -11  -7  -9   97.09   21.70
  11   7   9   83.29   17.60
  11   7   9   72.09   15.00
  11   7   9  119.49   24.50
  11   7   9   92.19   30.80
 -10  -7  -9   30.70   16.00
  10   7   9   26.90   22.70
  10   7   9   29.80   17.00
  10   7   9   25.10   11.10
  -9  -7  -9   10.10   13.20
   9   7   9    8.40   10.00
   9   7   9    7.10    9.20
   9   7   9   -5.50   15.00
   9   7   9    8.80   18.60
  -8  -7  -9  125.19   18.00
  -8  -7  -9  124.99   18.90
   8   7   9  137.69   18.30
   8   7   9  141.99   19.40
   8   7   9  140.79   22.30
   8   7   9  144.09   23.00
   8   7   9  155.78   31.10
  -7  -7  -9   41.70    8.70
  -7  -7  -9   46.90   11.50
  -7  -7  -9   37.40   10.50
  -7  -7  -9   42.60   10.10
  -7  -7  -9   41.70    8.70
   7   7   9   33.80    9.60
   7   7   9   37.30    9.80
   7   7   9   48.20   13.80
   7   7   9   47.10    7.90
   7   7   9   43.20   18.30
   7   7   9   41.10    9.70
  -6  -7  -9  103.59   11.60
  -6  -7  -9   72.09   13.00
   6   7   9  105.69   21.20
   6   7   9   86.99   12.10
   6   7   9  101.09   10.70
   6   7   9   76.29   12.20
   6   7   9   95.79   16.00
  -5  -7  -9 1558.64   86.29
  -5  -7  -9 1613.04   79.99
   5   7   9 1544.25   82.79
   5   7   9 1644.24   83.19
   5   7   9 1689.63   92.69
   5   7   9 1582.34   84.69
   5   7   9 1619.04   79.49
  -4  -7  -9 2459.65  119.69
  -4  -7  -9 2443.46  125.59
   4   7   9 2371.46  122.49
   4   7   9 2394.26  122.19
   4   7   9 2584.14  129.79
   4   7   9 2521.25  122.99
  -3  -7  -9  211.68   18.70
  -3  -7  -9  178.38   15.40
   3   7   9  187.38   18.70
   3   7   9  207.28   20.80
   3   7   9  207.38   19.40
  -2  -7  -9 1161.18   60.59
  -2  -7  -9 1211.48   64.29
   2   7   9 1172.68   64.89
   2   7   9 1138.69   62.99
   2   7   9 1184.58   63.79
  -1  -7  -9 1259.77   63.49
  -1  -7  -9 1259.67   65.59
   1   7   9 1228.18   65.29
   1   7   9 1230.18   66.49
   1   7   9 1092.29   64.79
   0  -7  -9    1.90    7.00
   0  -7  -9   -0.60    5.30
   0   7   9   -1.10    6.70
   0   7   9    2.00    5.30
   1  -7  -9  242.58   20.40
   1  -7  -9  231.98   20.70
  -1   7   9  177.88   18.20
  -1   7   9  239.28   21.80
   2  -7  -9   65.99   12.70
   2  -7  -9   64.09   12.60
   2  -7  -9   64.19   11.30
  -2   7   9   52.69   10.70
  -2   7   9   55.29   12.10
   3  -7  -9   37.80   12.10
   3  -7  -9   46.70   12.20
   3  -7  -9   35.50   11.50
  -3   7   9   53.79   12.30
   4  -7  -9   -0.30   11.80
   4  -7  -9    7.50   12.90
   4  -7  -9   -3.00   11.50
  -4   7   9    3.40   11.00
  -4   7   9   -2.20   10.70
   5  -7  -9   75.49   19.00
   5  -7  -9   76.39   17.40
   5  -7  -9   55.39   16.90
  -5   7   9   63.89   15.00
   6  -7  -9   29.40   17.20
   6  -7  -9    8.80   16.00
   6  -7  -9   22.40   17.10
  -6   7   9   26.50   18.30
   7  -7  -9  105.29   22.70
   7  -7  -9  154.18   23.90
   7  -7  -9   60.49   19.10
   8  -7  -9  333.87   40.60
   8  -7  -9  243.48   38.30
   8  -7  -9  348.67   43.10
   9  -7  -9   82.79   28.00
   9  -7  -9   68.19   26.00
 -13  -6  -8   26.90   27.00
  13   6   8   26.00   33.20
  13   6   8   34.60   17.20
 -12  -6  -8   21.50   22.20
 -12  -6  -8   28.70   13.80
  12   6   8   16.20   18.70
  12   6   8   40.80   16.60
  12   6   8   36.10   30.70
 -11  -6  -8  271.47   37.70
  11   6   8  303.47   39.40
  11   6   8  294.37   33.50
  11   6   8  282.17   26.60
  11   6   8  348.27   54.99
 -10  -6  -8  851.21   57.69
  10   6   8  863.31   57.59
  10   6   8  925.01   77.89
  10   6   8  827.52   62.69
  10   6   8  882.31   51.59
  -9  -6  -8 1531.45   85.09
   9   6   8 1565.64   81.39
   9   6   8 1511.15   91.49
   9   6   8 1497.05   85.79
   9   6   8 1556.94  104.39
  -8  -6  -8  168.58   17.10
  -8  -6  -8  222.98   24.40
   8   6   8  162.18   18.10
   8   6   8  207.38   22.90
   8   6   8  222.78   21.00
   8   6   8  219.18   28.70
   8   6   8  170.38   31.10
  -7  -6  -8  297.37   24.50
  -7  -6  -8  313.77   23.60
  -7  -6  -8  310.67   20.70
   7   6   8  301.37   23.10
   7   6   8  310.17   28.90
   7   6   8  281.87   22.80
   7   6   8  303.27   36.20
   7   6   8  311.57   24.60
   7   6   8  306.17   20.20
  -6  -6  -8  578.24   32.40
   6   6   8  583.94   46.00
   6   6   8  580.34   35.30
   6   6   8  585.14   32.30
   6   6   8  576.44   34.80
   6   6   8  601.34   35.00
   6   6   8  582.64   39.80
  -5  -6  -8   93.69   10.60
  -5  -6  -8  100.29   13.90
   5   6   8   74.69   16.60
   5   6   8  107.39   15.80
   5   6   8   96.49    9.50
   5   6   8  105.69   13.20
   5   6   8   96.09   12.50
   5   6   8  108.29   13.20
  -4  -6  -8  378.56   21.80
  -4  -6  -8  353.46   26.10
   4   6   8  385.66   21.20
   4   6   8  362.66   24.40
   4   6   8  362.46   24.40
   4   6   8  360.16   30.00
   4   6   8  337.17   25.00
  -3  -6  -8  110.29   11.00
  -3  -6  -8  103.59   12.70
   3   6   8  113.49   13.80
   3   6   8  123.39   14.10
   3   6   8   96.79   14.70
  -2  -6  -8  393.36   25.70
  -2  -6  -8  364.06   22.70
   2   6   8  397.06   27.00
   2   6   8  343.57   24.90
   2   6   8  370.26   25.10
  -1  -6  -8 1050.59   54.69
  -1  -6  -8 1096.89   57.39
   1   6   8 1002.20   56.89
   1   6   8 1054.29   56.89
   1   6   8 1085.99   57.49
   0  -6  -8  735.73   40.10
   0  -6  -8  778.92   41.50
   0   6   8  593.94   40.30
   0   6   8  773.12   42.10
   1  -6  -8  252.67   19.90
   1  -6  -8  271.67   20.50
   1  -6  -8  304.17   21.20
  -1   6   8  259.57   21.60
  -1   6   8  204.18   19.00
   2  -6  -8  844.22   46.20
   2  -6  -8  866.31   46.20
   2  -6  -8  795.52   46.40
  -2   6   8  723.83   45.30
  -2   6   8  814.72   46.80
   3  -6  -8  961.50   57.69
   3  -6  -8 1077.39   56.49
   3  -6  -8 1068.89   57.29
  -3   6   8  880.81   55.09
  -3   6   8 1061.09   56.99
   4  -6  -8  252.17   26.20
   4  -6  -8  261.47   25.50
   4  -6  -8  219.88   25.80
  -4   6   8  226.48   23.50
  -4   6   8  229.18   24.20
   5  -6  -8   55.99   14.90
   5  -6  -8   60.79   15.30
   5  -6  -8   59.09   15.50
  -5   6   8   45.70   12.20
  -5   6   8   36.20   14.00
   6  -6  -8  941.31   60.09
   6  -6  -8  954.40   63.49
   6  -6  -8 1049.89   61.49
  -6   6   8  912.21   59.19
  -6   6   8  921.71   56.29
   7  -6  -8  879.51   60.19
   7  -6  -8  784.32   54.69
   7  -6  -8  880.51   56.79
  -7   6   8  699.33   54.69
   8  -6  -8   23.70   18.00
   8  -6  -8   33.90   20.00
   8  -6  -8   39.70   21.30
   9  -6  -8  -19.00   18.60
   9  -6  -8  -14.00   19.10
 -13  -5  -7   61.19   28.60
 -13  -5  -7   70.09   17.90
  13   5   7   63.99   21.50
  13   5   7   76.09   28.50
  13   5   7   53.69   35.80
 -12  -5  -7  138.29   31.00
  12   5   7  103.99   23.30
  12   5   7  110.09   28.90
  12   5   7  151.98   44.50
 -11  -5  -7  635.14   53.39
  11   5   7  666.63   42.80
  11   5   7  724.93   73.59
  11   5   7  665.73   51.99
  11   5   7  667.33   56.59
 -10  -5  -7  115.79   22.00
  10   5   7   92.29   18.80
  10   5   7  137.29   18.60
  10   5   7  115.09   23.80
  10   5   7   81.59   28.00
  -9  -5  -7  174.38   28.50
   9   5   7  144.89   22.40
   9   5   7  184.28   19.90
   9   5   7  186.18   27.30
   9   5   7  206.98   38.40
  -8  -5  -7  300.67   29.80
   8   5   7  312.77   41.40
   8   5   7  353.66   34.30
   8   5   7  345.87   25.50
   8   5   7  355.46   23.20
   8   5   7  363.46   30.50
  -7  -5  -7  154.58   14.10
  -7  -5  -7  173.48   16.70
  -7  -5  -7  178.18   19.90
   7   5   7  177.78   29.30
   7   5   7  195.58   20.30
   7   5   7  156.28   14.20
   7   5   7  176.98   16.70
   7   5   7  185.78   23.60
   7   5   7  168.88   16.90
  -6  -5  -7   13.10    5.50
  -6  -5  -7    7.50    4.60
   6   5   7    6.60    9.10
   6   5   7   10.60    4.70
   6   5   7   13.80   12.00
   6   5   7   14.50    6.10
   6   5   7    6.70    6.60
   6   5   7    9.30    5.40
  -5  -5  -7  193.98   13.30
   5   5   7  171.98   19.10
   5   5   7  189.88   15.90
   5   5   7  179.18   15.80
   5   5   7  190.68   15.50
   5   5   7  194.28   24.30
   5   5   7  169.58   12.80
  -4  -5  -7  107.89    9.70
  -4  -5  -7  103.49   12.60
   4   5   7   89.99   11.60
   4   5   7  110.19    8.90
   4   5   7  104.79   11.70
   4   5   7  111.49   17.00
   4   5   7   90.69   13.60
  -3  -5  -7   45.60    6.40
  -3  -5  -7   27.10    6.70
   3   5   7   30.10    6.50
   3   5   7   34.80    7.40
   3   5   7   46.70    5.80
   3   5   7   31.70    6.70
   3   5   7   40.00   10.20
  -2  -5  -7  283.87   19.80
  -2  -5  -7  238.28   16.50
   2   5   7  272.17   19.10
   2   5   7  247.28   18.90
   2   5   7  293.67   21.40
  -1  -5  -7  925.51   49.80
  -1  -5  -7  895.71   47.10
   1   5   7  895.61   49.90
   1   5   7  942.91   49.60
   1   5   7  947.01   49.20
   0  -5  -7   19.70    5.60
   0  -5  -7   23.00    6.10
   0   5   7   14.10    7.70
   0   5   7   17.70    6.00
   0   5   7   17.20    6.20
   1  -5  -7 2212.58  106.69
   1  -5  -7 2328.07  107.49
  -1   5   7 1832.12  106.49
  -1   5   7 2288.27  108.19
   2  -5  -7 3986.30  195.18
   2  -5  -7 4129.29  194.88
   2  -5  -7 4255.37  194.78
  -2   5   7 3656.33  194.38
  -2   5   7 4158.98  195.68
   3  -5  -7  542.35   35.50
   3  -5  -7  530.45   33.20
   3  -5  -7  542.25   34.40
  -3   5   7  580.74   34.10
  -3   5   7  525.55   33.90
   4  -5  -7  190.88   22.40
   4  -5  -7  202.98   21.60
   4  -5  -7  147.49   18.20
   4  -5  -7  184.58   21.00
  -4   5   7  202.08   20.00
  -4   5   7  165.78   20.90
   5  -5  -7  296.67   28.70
   5  -5  -7  315.37   26.70
   5  -5  -7  330.57   27.90
   5  -5  -7  292.07   28.90
  -5   5   7  272.67   28.00
  -5   5   7  242.58   21.10
  -5   5   7  294.77   25.10
   6  -5  -7    0.90   12.80
   6  -5  -7   23.10   15.10
   6  -5  -7   36.00   15.10
   6  -5  -7   26.40   12.80
  -6   5   7   29.30   15.90
  -6   5   7    9.80   10.50
   7  -5  -7   92.49   19.70
   7  -5  -7  100.09   22.10
   7  -5  -7   88.09   19.30
  -7   5   7   48.70   19.90
   8  -5  -7   92.59   21.50
   8  -5  -7   73.39   21.60
   8  -5  -7   82.79   19.50
   9  -5  -7  -35.20   16.90
   9  -5  -7   -4.30   19.30
  10  -5  -7  -13.40   19.20
  10  -5  -7    8.60   23.20
 -13  -4  -6  426.76   53.99
 -13  -4  -6  426.36   38.90
  13   4   6  489.95   55.49
  13   4   6  475.55   51.29
  13   4   6  564.44   76.29
 -12  -4  -6  479.25   51.99
  12   4   6  441.86   48.30
  12   4   6  473.05   70.69
  12   4   6  507.25   53.59
 -11  -4  -6  227.28   37.40
  11   4   6  158.88   30.10
  11   4   6  183.78   20.60
  11   4   6  130.39   24.30
  11   4   6  143.19   38.80
 -10  -4  -6   51.69   20.00
  10   4   6   29.80   16.20
  10   4   6   23.10    8.40
  10   4   6   18.80   23.80
  10   4   6   48.70   20.10
  -9  -4  -6   58.09   19.80
   9   4   6   34.70   22.30
   9   4   6   57.99   18.10
   9   4   6   45.40   15.70
  -8  -4  -6   23.80   14.30
   8   4   6   25.80   19.30
   8   4   6   25.60    8.30
   8   4   6   37.70   14.80
   8   4   6   25.60   11.70
   8   4   6   29.50    7.10
  -7  -4  -6    0.30    9.30
   7   4   6    1.10    7.70
   7   4   6   -0.80   12.30
   7   4   6   -5.20    5.20
   7   4   6    4.10    4.40
   7   4   6   -3.60    8.10
  -6  -4  -6   37.20    6.90
  -6  -4  -6   37.60    9.20
   6   4   6   32.10    6.40
   6   4   6   37.20    6.30
   6   4   6   39.60    7.70
   6   4   6   43.20   15.10
   6   4   6   35.90    9.70
   6   4   6   35.50   11.40
  -5  -4  -6  107.49    9.40
   5   4   6   82.39   16.40
   5   4   6  108.29   14.00
   5   4   6  118.99   11.50
   5   4   6  123.89   12.20
   5   4   6  113.19    9.80
   5   4   6  108.79   15.60
  -4  -4  -6 1445.06   69.89
   4   4   6 1510.35   80.79
   4   4   6 1392.76   71.49
   4   4   6 1398.76   74.99
   4   4   6 1498.45   70.19
   4   4   6 1466.75   72.19
   4   4   6 1366.06   72.09
  -3  -4  -6 3924.71  177.68
  -3  -4  -6 3610.24  182.28
   3   4   6 3790.42  179.38
   3   4   6 3520.15  180.38
   3   4   6 3887.71  177.48
   3   4   6 3865.11  185.68
   3   4   6 3652.03  179.18
  -2  -4  -6  237.28   17.80
  -2  -4  -6  232.18   14.70
   2   4   6  286.07   17.00
   2   4   6  253.87   17.00
   2   4   6  243.48   19.30
   2   4   6  217.98   15.60
  -1  -4  -6 2697.13  135.09
  -1  -4  -6 2923.51  138.29
   1   4   6 2935.31  138.69
   1   4   6 2864.61  136.69
   1   4   6 2756.02  137.09
   0  -4  -6 3807.02  186.98
   0  -4  -6 3988.20  188.58
   0   4   6 3993.10  188.78
   0   4   6 4067.09  188.28
   0   4   6 3798.12  188.88
   1  -4  -6 2924.91  135.49
   1  -4  -6 2815.22  134.79
   1  -4  -6 2714.63  134.49
  -1   4   6 2943.11  136.29
  -1   4   6 2569.04  135.19
   2  -4  -6   16.60    6.80
   2  -4  -6   14.60    5.20
   2  -4  -6   15.80    6.40
  -2   4   6   19.40    6.20
  -2   4   6   10.40    5.60
   3  -4  -6   37.40    7.50
   3  -4  -6   37.10    8.70
   3  -4  -6   40.60    8.40
  -3   4   6   42.20    7.90
  -3   4   6   26.70    8.10
   4  -4  -6   74.79   12.10
   4  -4  -6   56.79   10.50
   4  -4  -6   72.19   13.30
   4  -4  -6   68.79   11.40
  -4   4   6   69.69   12.70
  -4   4   6   51.89    7.80
  -4   4   6   55.99   10.10
   5  -4  -6   38.00   12.90
   5  -4  -6   19.90   10.40
   5  -4  -6   20.00   10.60
   5  -4  -6   30.20   11.90
  -5   4   6   42.00   14.10
  -5   4   6   26.40    8.90
  -5   4   6   29.00    8.10
   6  -4  -6   10.20   10.50
   6  -4  -6    7.30   11.60
   6  -4  -6    1.00   11.30
   6  -4  -6    4.80   13.10
  -6   4   6   -1.10   14.90
  -6   4   6    6.00    8.70
  -6   4   6    5.40    8.00
   7  -4  -6   27.60   16.40
   7  -4  -6   95.59   21.60
   7  -4  -6   33.20   15.70
   7  -4  -6   14.60   14.20
  -7   4   6   21.70   19.20
  -7   4   6   19.40   11.50
   8  -4  -6    7.20   15.00
   8  -4  -6    6.20   15.10
   8  -4  -6   10.40   14.50
   8  -4  -6   10.60   16.80
  -8   4   6  -22.80   19.00
  -8   4   6    5.10   11.00
   9  -4  -6   21.20   19.30
   9  -4  -6   56.09   17.40
   9  -4  -6   29.60   20.50
   9  -4  -6   41.90   17.70
  -9   4   6  -19.30   21.30
  10  -4  -6   64.69   26.30
 -10   4   6   -3.90   24.90
  11  -4  -6   29.50   24.20
  11  -4  -6   -5.40   19.90
 -13  -3  -5   44.70   29.20
  13   3   5   15.80   32.60
 -12  -3  -5   70.29   27.60
  12   3   5   42.20   26.10
  12   3   5   74.89   34.70
  12   3   5   51.29   22.40
 -11  -3  -5    7.90   23.10
  11   3   5    6.40    7.50
  11   3   5   -0.60   15.90
  11   3   5   11.60   19.30
  11   3   5   30.70   28.10
 -10  -3  -5   11.30   20.40
  10   3   5   11.20   15.40
  10   3   5   15.10    7.80
  10   3   5    8.80   22.50
  10   3   5   16.60   18.50
  -9  -3  -5   26.00   19.30
   9   3   5    3.50   15.50
   9   3   5   29.60   16.00
   9   3   5   20.70   23.70
   9   3   5   28.80    9.20
  -8  -3  -5   99.89   18.80
   8   3   5  101.69   17.50
   8   3   5  106.69   13.30
   8   3   5  115.69   27.80
   8   3   5   90.69   14.40
   8   3   5   97.19   19.60
  -7  -3  -5   67.89   13.20
   7   3   5   91.59   12.60
   7   3   5   68.29   13.70
   7   3   5   80.19   10.70
   7   3   5   72.59   19.30
   7   3   5   85.89   16.80
  -6  -3  -5  244.08   21.10
   6   3   5  274.07   17.90
   6   3   5  255.57   19.00
   6   3   5  264.97   30.50
   6   3   5  271.37   23.70
   6   3   5  270.37   25.40
   5   3   5 2071.89  103.79
   5   3   5 2196.68  116.59
   5   3   5 2169.88  105.09
   5   3   5 2157.38  108.09
   5   3   5 2121.99  110.19
   4   3   5 3847.01  187.38
   4   3   5 4022.30  197.48
   4   3   5 3764.82  191.78
   4   3   5 4188.08  188.78
   4   3   5 3924.81  189.98
  -3  -3  -5  606.24   30.10
   3   3   5  614.74   31.60
   3   3   5  594.14   30.10
   3   3   5  569.34   34.00
   3   3   5  617.44   32.10
   3   3   5  574.84   37.80
  -2  -3  -5  461.65   23.20
   2   3   5  458.05   22.80
   2   3   5  419.36   25.20
   2   3   5  410.66   24.60
   2   3   5  496.05   29.30
   2   3   5  443.86   24.60
  -1  -3  -5 1682.23   84.59
  -1  -3  -5 1779.92   87.69
   1   3   5 1743.83   86.39
   1   3   5 1778.12   85.89
   1   3   5 1852.81   88.39
   0  -3  -5   34.50    5.50
   0  -3  -5   38.80    5.60
   0   3   5   40.00    6.20
   0   3   5   43.30    7.30
   0   3   5   38.10    5.70
   1  -3  -5  114.69   10.80
   1  -3  -5  112.89   10.00
  -1   3   5  135.39   11.40
  -1   3   5  105.79   11.20
   2  -3  -5 1331.77   68.79
   2  -3  -5 1358.86   67.49
   2  -3  -5 1360.36   68.39
  -2   3   5 1415.26   68.99
  -2   3   5 1323.27   68.29
   3  -3  -5  242.78   19.50
   3  -3  -5  251.37   18.00
   3  -3  -5  280.87   19.10
   3  -3  -5  240.28   20.40
  -3   3   5  253.87   15.50
  -3   3   5  238.38   18.70
  -3   3   5  253.07   19.40
   4  -3  -5   77.59   11.80
   4  -3  -5   66.89   12.20
   4  -3  -5   53.89   10.40
   4  -3  -5   56.79    9.50
  -4   3   5   64.19    9.30
  -4   3   5   52.79    9.10
  -4   3   5   73.39   12.20
   5  -3  -5   28.30   10.10
   5  -3  -5   33.70   10.10
   5  -3  -5   33.60   11.70
   5  -3  -5   36.30   10.80
  -5   3   5   26.40    7.50
  -5   3   5   17.60    7.60
  -5   3   5   41.60   13.30
   6  -3  -5   28.60   12.90
   6  -3  -5   24.70   10.80
   6  -3  -5   19.40   10.40
   6  -3  -5   29.40   12.10
  -6   3   5   22.20    8.70
  -6   3   5   10.10    7.50
  -6   3   5   18.70   15.00
   7  -3  -5 1356.26   71.09
   7  -3  -5 1263.57   74.59
   7  -3  -5 1330.87   72.19
   7  -3  -5 1275.37   76.69
  -7   3   5 1231.28   76.89
  -7   3   5 1261.17   67.09
  -7   3   5 1168.48   76.09
   8  -3  -5 1029.20   66.19
   8  -3  -5 1091.19   69.79
   8  -3  -5 1049.00   62.89
   8  -3  -5 1044.30   59.89
  -8   3   5  956.60   56.99
  -8   3   5  968.70   68.49
   9  -3  -5  294.77   33.10
   9  -3  -5  321.97   35.40
   9  -3  -5  327.57   41.10
  -9   3   5  240.58   36.10
  -9   3   5  299.77   27.00
  10  -3  -5  124.19   24.90
  10  -3  -5   89.09   25.80
  10  -3  -5  111.29   22.00
 -10   3   5  165.18   24.00
  11  -3  -5  483.85   56.39
  11  -3  -5  443.36   45.90
  11  -3  -5  492.05   49.50
 -11   3   5  423.36   41.10
 -12  -2  -4   79.49   28.60
  12   2   4  107.79   29.90
  12   2   4   86.09   27.00
  12   2   4  153.38   44.20
 -11  -2  -4   26.70   24.50
  11   2   4   17.90   28.50
  11   2   4   34.50   19.60
  11   2   4   26.90    9.20
  11   2   4   16.60   21.10
 -10  -2  -4  511.55   48.00
  10   2   4  465.35   32.50
  10   2   4  493.85   47.20
  10   2   4  543.75   61.69
  10   2   4  517.25   46.10
  -9  -2  -4  451.55   41.90
   9   2   4  490.45   41.50
   9   2   4  427.86   29.20
   9   2   4  431.36   54.19
   9   2   4  345.57   29.20
   9   2   4  445.86   42.40
  -8  -2  -4  202.58   28.90
   8   2   4  252.27   28.60
  -7  -2  -4  736.73   46.70
   7   2   4  780.22   50.69
   7   2   4  747.83   42.30
   7   2   4  775.72   42.50
   7   2   4  776.12   59.49
   7   2   4  767.72   49.00
  -6  -2  -4 3419.26  161.48
   6   2   4 3048.40  158.68
   6   2   4 3464.65  159.68
   6   2   4 3411.56  164.58
   6   2   4 3280.77  166.18
   6   2   4 3145.69  172.88
  -5  -2  -4  454.35   28.50
   5   2   4  451.95   31.00
   5   2   4  468.45   26.30
   5   2   4  481.95   27.20
   5   2   4  452.45   37.60
   5   2   4  456.95   32.40
   4   2   4  517.55   31.20
   4   2   4  507.35   36.20
   4   2   4  492.25   32.40
   4   2   4  526.35   28.50
   3   2   4 2314.97  115.29
   3   2   4 2356.46  113.79
   3   2   4 2390.46  112.59
   3   2   4 2200.78  111.29
   3   2   4 2449.25  119.59
   2   2   4  119.99   13.40
   2   2   4  112.19   11.50
   2   2   4  137.59    9.70
   2   2   4  144.69   10.00
  -1  -2  -4  617.74   31.60
   1   2   4  640.14   32.90
   1   2   4  666.53   33.50
   1   2   4  704.23   35.80
   1   2   4  605.14   32.80
   0  -2  -4  955.40   50.09
   0  -2  -4  922.31   48.70
   0   2   4 1104.39   51.29
   0   2   4 1007.80   50.39
   0   2   4  961.60   49.30
   1  -2  -4 4115.89  203.18
   1  -2  -4 4168.58  203.18
  -1   2   4 4454.85  204.38
  -1   2   4 4531.95  204.28
  -1   2   4 4212.78  203.28
   2  -2  -4 1707.63   82.49
   2  -2  -4 1632.44   82.79
   2  -2  -4 1710.63   81.49
   2  -2  -4 1669.53   81.99
  -2   2   4 1661.03   82.49
  -2   2   4 1723.93   82.79
  -2   2   4 1652.43   80.19
   3  -2  -4 3043.80  147.79
   3  -2  -4 3071.49  145.79
   3  -2  -4 2897.11  148.09
   3  -2  -4 3038.80  147.09
  -3   2   4 3064.49  144.79
  -3   2   4 3161.48  147.09
  -3   2   4 3034.70  147.29
   4  -2  -4  742.03   41.40
   4  -2  -4  761.92   42.90
   4  -2  -4  717.33   43.40
   4  -2  -4  715.73   40.20
  -4   2   4  755.82   43.00
  -4   2   4  736.93   40.30
  -4   2   4  723.43   38.40
   5  -2  -4  180.98   18.90
   5  -2  -4  180.98   21.90
   5  -2  -4  195.68   20.70
   5  -2  -4  219.98   20.10
  -5   2   4  204.48   17.30
  -5   2   4  201.38   23.60
  -5   2   4  210.78   16.00
   6  -2  -4 1774.62   83.69
   6  -2  -4 1558.04   88.19
   6  -2  -4 1553.14   87.19
   6  -2  -4 1572.24   84.19
  -6   2   4 1567.44   87.89
  -6   2   4 1627.04   81.19
  -6   2   4 1609.14   81.69
   7  -2  -4  713.73   48.30
   7  -2  -4  783.62   50.79
   7  -2  -4  693.93   44.80
   7  -2  -4  727.73   43.40
  -7   2   4  650.83   51.89
  -7   2   4  685.73   41.10
   8  -2  -4   31.60   13.30
   8  -2  -4   43.60   14.20
   8  -2  -4   39.50   17.20
   8  -2  -4    9.30   16.00
  -8   2   4   26.70   13.20
  -8   2   4   19.00   22.30
   9  -2  -4   63.99   16.70
   9  -2  -4  103.59   23.40
   9  -2  -4   84.89   22.00
   9  -2  -4   91.69   16.20
  -9   2   4   51.59   24.10
  -9   2   4   77.39   15.50
  10  -2  -4  100.99   25.30
  10  -2  -4  105.59   21.00
  10  -2  -4   99.69   24.50
 -10   2   4   99.89   18.30
 -10   2   4   57.79   26.00
  11  -2  -4   17.20   22.30
  11  -2  -4   12.10   22.60
  11  -2  -4   -7.60   16.60
 -11   2   4  -14.70   15.30
  12  -2  -4   31.70   23.20
  12  -2  -4   27.60   26.50
  12  -2  -4   -2.30   17.20
 -12   2   4   14.30   17.30
 -12   2   4  -53.39   24.60
 -12  -1  -3  369.16   50.19
  12   1   3  460.95   52.99
  12   1   3  475.25   53.99
  12   1   3  481.15   69.29
 -11  -1  -3  440.26   50.39
  11   1   3  402.16   31.70
  11   1   3  513.05   50.79
  11   1   3  552.34   52.59
  11   1   3  529.95   66.19
 -10  -1  -3  583.84   49.90
  10   1   3  417.76   57.89
  10   1   3  492.05   48.20
  10   1   3  489.95   47.60
  -9  -1  -3  212.28   35.80
   9   1   3  208.08   30.70
   9   1   3  196.98   28.40
   9   1   3  201.28   21.60
   9   1   3  212.08   20.40
   9   1   3  237.98   42.10
  -8  -1  -3  841.22   55.29
   8   1   3  767.02   46.10
   8   1   3  725.33   65.79
   8   1   3  783.82   45.80
   8   1   3  858.41   56.69
   8   1   3  897.71   55.89
  -7  -1  -3  540.65   38.80
   7   1   3  515.45   39.60
   7   1   3  500.35   31.70
   7   1   3  470.65   47.80
   7   1   3  566.84   39.70
   7   1   3  547.75   32.00
  -6  -1  -3  291.27   24.60
   6   1   3  281.17   26.30
   6   1   3  266.37   32.90
   6   1   3  304.87   26.70
   6   1   3  301.97   20.10
   6   1   3  276.27   20.10
  -5  -1  -3  103.59   14.40
   5   1   3  118.59   16.70
   5   1   3  109.59   11.00
   5   1   3  105.79   11.30
   5   1   3  109.59   16.60
   5   1   3  109.29   19.00
  -4  -1  -3 1064.79   55.09
   4   1   3 1053.49   58.59
   4   1   3 1076.39   57.49
   4   1   3 1072.69   53.79
   4   1   3 1105.59   63.69
   4   1   3 1092.29   54.59
   3   1   3  933.01   53.29
   3   1   3  976.70   47.00
   3   1   3  890.51   49.60
   3   1   3  900.01   48.50
   2   1   3    4.40    4.50
   2   1   3    8.40    4.10
   2   1   3    2.90    3.20
   2   1   3    3.60    5.30
   1   1   3  588.04   32.30
   1   1   3  575.24   29.60
   1   1   3  583.44   30.60
   1   1   3  616.54   29.90
   0  -1  -3   -1.90    2.00
   0  -1  -3   -1.40    2.30
   0   1   3   -2.00    2.00
   0   1   3   -0.60    2.90
   0   1   3   -0.80    2.80
   0   1   3    0.10    2.30
   1  -1  -3 2432.96  117.19
   1  -1  -3 2368.26  117.39
  -1   1   3 2663.33  118.49
  -1   1   3 2542.95  118.39
  -1   1   3 2423.66  116.39
  -1   1   3 2408.16  117.09
   2  -1  -3 1347.87   63.39
   2  -1  -3 1255.97   64.39
   2  -1  -3 1376.16   64.99
   2  -1  -3 1250.27   64.99
  -2   1   3 1253.07   62.99
  -2   1   3 1283.37   64.79
  -2   1   3 1376.06   64.99
   3  -1  -3 1440.76   78.39
   3  -1  -3 1514.85   78.49
   3  -1  -3 1628.04   76.09
   3  -1  -3 1512.45   77.29
  -3   1   3 1594.94   75.79
  -3   1   3 1620.54   78.59
  -3   1   3 1615.94   77.29
   4  -1  -3 3890.81  189.18
   4  -1  -3 4046.60  185.58
   4  -1  -3 3650.43  188.88
   4  -1  -3 3855.81  186.98
  -4   1   3 3899.91  188.58
  -4   1   3 3963.80  186.18
  -4   1   3 3938.01  185.08
   5  -1  -3 4726.83  209.68
   5  -1  -3 4280.47  211.28
   5  -1  -3 4311.47  214.18
   5  -1  -3 4270.17  214.28
  -5   1   3 4436.76  209.78
  -5   1   3 4234.78  213.48
  -5   1   3 4443.46  209.08
   6  -1  -3  472.85   28.40
   6  -1  -3  441.66   29.90
   6  -1  -3  440.46   34.20
   6  -1  -3  431.26   33.50
  -6   1   3  459.45   27.60
  -6   1   3  433.66   27.60
  -6   1   3  412.36   35.90
   7  -1  -3   54.39   15.30
   7  -1  -3   48.10   11.60
   7  -1  -3   51.09   10.60
   7  -1  -3   53.99   14.70
  -7   1   3   43.10   10.80
  -7   1   3   43.70   18.10
   8  -1  -3   25.00   13.80
   8  -1  -3   40.00   15.00
   8  -1  -3   35.40   10.00
   8  -1  -3   28.40   11.80
  -8   1   3   53.19   12.40
  -8   1   3   38.50   20.30
   9  -1  -3  197.78   21.20
   9  -1  -3  147.09   26.50
   9  -1  -3  145.89   25.30
   9  -1  -3  187.88   25.10
  -9   1   3  140.99   19.70
  -9   1   3  119.99   26.60
  10  -1  -3   28.30   19.10
  10  -1  -3   20.10   14.00
  10  -1  -3   38.60   19.60
 -10   1   3   31.20   14.00
 -10   1   3  -19.10   19.40
  11  -1  -3  345.67   46.70
  11  -1  -3  267.37   32.90
  11  -1  -3  290.57   41.70
 -11   1   3  288.17   30.90
  12  -1  -3  137.19   31.00
  12  -1  -3   69.49   21.00
  12  -1  -3   82.79   29.40
 -12   1   3   35.70   28.70
 -12   1   3   94.89   20.80
 -12   0  -2   88.39   29.00
  12   0   2  167.38   34.20
  12   0   2  165.38   32.70
  12   0   2  158.58   46.60
 -11   0  -2   59.69   25.20
  11   0   2   21.90   29.20
  11   0   2   51.89   24.20
  11   0   2   38.30   24.50
  11   0   2   21.50    9.80
 -10   0  -2   33.30   22.40
  10   0   2   30.50   20.00
  10   0   2   39.90   27.70
  10   0   2   36.10   10.20
  10   0   2   38.30   21.40
  -9   0  -2   40.00   22.90
   9   0   2   79.59   29.90
   9   0   2   37.70   20.00
   9   0   2   58.99   20.40
   9   0   2   54.79   11.50
   9   0   2   38.50   12.00
  -8   0  -2  104.79   23.70
   8   0   2   52.89   11.20
   8   0   2   55.69   17.20
   8   0   2   71.89   27.40
   8   0   2   40.40   10.20
   8   0   2   29.50   15.90
  -7   0  -2    5.50   15.40
   7   0   2   -4.70   15.50
   7   0   2   16.60    7.80
   7   0   2   18.20   11.40
   7   0   2   16.30   11.40
   7   0   2    4.80    7.00
  -6   0  -2  624.14   39.30
   6   0   2  576.84   49.10
   6   0   2  590.64   34.50
   6   0   2  606.54   41.00
   6   0   2  606.04   40.90
   6   0   2  607.14   34.60
  -5   0  -2  321.97   24.10
   5   0   2  310.57   32.50
   5   0   2  321.87   20.90
   5   0   2  327.37   26.20
   5   0   2  311.77   20.40
   5   0   2  320.17   26.10
  -4   0  -2  642.74   36.10
   4   0   2  715.33   45.00
   4   0   2  670.33   35.20
   4   0   2  627.24   34.50
   4   0   2  633.14   38.60
   4   0   2  664.63   39.60
  -3   0  -2 2940.81  138.69
   3   0   2 2827.72  145.09
   3   0   2 2815.32  140.49
   3   0   2 2839.92  141.59
   3   0   2 2891.31  137.59
   3   0   2 3052.69  138.69
   2   0   2  977.20   50.79
   2   0   2  926.91   51.49
   2   0   2 1097.69   49.99
   1   0   2 3926.61  171.38
   1   0   2 3577.14  172.48
   1   0   2 3397.86  171.28
   0   0   2 8542.04  350.16
   0   0   2 6290.87  349.57
   0   0   2 7453.85  348.27
   1   0  -2 1412.06   68.09
   1   0  -2 1356.96   68.79
   1   0  -2 1433.66   68.89
  -1   0   2 1473.25   68.39
  -1   0   2 1486.35   69.39
  -1   0   2 1471.45   69.49
   2   0  -2  283.67   16.70
   2   0  -2  285.07   17.30
   2   0  -2  267.07   17.30
   2   0  -2  314.77   15.00
  -2   0   2  290.77   17.70
  -2   0   2  286.87   17.30
  -2   0   2  267.57   15.60
   3   0  -2  521.85   25.80
   3   0  -2  452.35   28.20
   3   0  -2  461.25   27.00
   3   0  -2  502.05   28.90
  -3   0   2  478.05   27.10
  -3   0   2  476.85   25.90
  -3   0   2  484.25   29.60
   4   0  -2   63.39    8.80
   4   0  -2   71.49   10.90
   4   0  -2   59.49    9.80
   4   0  -2   66.49    8.90
  -4   0   2   62.99   11.70
  -4   0   2   74.09    9.70
  -4   0   2   70.09    8.80
   5   0  -2   23.10    7.10
   5   0  -2   23.10    9.40
   5   0  -2   20.90    8.90
   5   0  -2   26.30    6.00
  -5   0   2   12.40    6.20
  -5   0   2   17.60    5.70
  -5   0   2   19.20   11.60
   6   0  -2  457.25   30.10
   6   0  -2  479.65   27.30
   6   0  -2  458.35   34.00
   6   0  -2  477.95   34.10
   6   0  -2  512.45   45.70
  -6   0   2  467.95   36.20
  -6   0   2  458.15   28.30
   7   0  -2  749.33   46.40
   7   0  -2  809.82   43.10
   7   0  -2  835.72   52.19
   7   0  -2  797.92   51.29
  -7   0   2  799.02   53.39
  -7   0   2  823.62   44.80
   8   0  -2  168.88   24.50
   8   0  -2  138.69   19.80
   8   0  -2  118.49   20.00
   8   0  -2  168.28   16.60
  -8   0   2  145.99   19.10
  -8   0   2  124.09   23.60
   9   0  -2   23.10   15.40
   9   0  -2   18.70   16.00
   9   0  -2   27.20   11.10
   9   0  -2   16.00    7.90
  -9   0   2   36.30   21.10
  -9   0   2   48.50   13.60
  10   0  -2   91.89   22.80
  10   0  -2  109.29   25.10
  10   0  -2   87.09   17.50
 -10   0   2  110.89   17.80
 -10   0   2   98.69   24.90
  11   0  -2   81.49   24.10
  11   0  -2   73.39   22.00
  11   0  -2   27.40   13.80
 -11   0   2   73.99   17.10
 -11   0   2   37.20   23.20
  12   0  -2  484.35   52.29
  12   0  -2  394.86   39.30
  12   0  -2  533.25   56.79
 -12   0   2  469.45   39.00
 -12   0   2  352.46   50.29
 -13   0   2  164.98   39.00
 -12   1  -1    9.40   26.60
  12  -1   1   46.50   29.40
  12  -1   1   72.19   30.50
  12  -1   1   -0.80   41.70
  11  -1   1  175.68   24.20
  11  -1   1  167.78   34.20
  11  -1   1  155.68   46.50
  11  -1   1  133.89   32.90
 -10   1  -1   27.20   22.10
  10  -1   1   32.70   20.40
  10  -1   1    2.00   25.00
  10  -1   1   12.00    9.20
  10  -1   1    6.10   20.10
  -9   1  -1   58.49   24.20
   9  -1   1  109.69   33.00
   9  -1   1  131.29   18.90
   9  -1   1  139.29   27.10
   9  -1   1  109.99   25.20
   9  -1   1   94.79   16.20
  -8   1  -1  564.94   49.80
   8  -1   1  590.54   38.40
   8  -1   1  721.13   64.39
   8  -1   1  627.14   48.30
   8  -1   1  639.94   48.70
   8  -1   1  588.34   39.10
  -7   1  -1  697.63   47.40
   7  -1   1  572.44   37.00
   7  -1   1  595.54   37.70
   7  -1   1  605.14   56.69
   7  -1   1  593.04   45.10
   7  -1   1  630.64   45.40
  -6   1  -1  420.36   35.60
   6  -1   1  524.45   36.60
   6  -1   1  477.55   30.00
   6  -1   1  529.75   46.60
   6  -1   1  502.35   36.40
   6  -1   1  459.65   29.70
  -5   1  -1 2612.24  129.09
   5  -1   1 2607.24  131.59
   5  -1   1 2631.44  132.19
   5  -1   1 2612.94  126.69
   5  -1   1 2649.83  140.19
   5  -1   1 2506.35  126.39
  -4   1  -1   65.39   10.10
   4  -1   1   54.89   13.60
   4  -1   1   46.90    9.10
   4  -1   1   49.00    9.70
   4  -1   1   74.19    9.70
  -3   1  -1  368.46   23.40
   3  -1   1  403.16   26.00
   3  -1   1  404.96   23.50
   3  -1   1  448.66   30.90
   3  -1   1  417.36   26.30
   3  -1   1  386.76   22.20
  -2   1  -1  532.55   30.40
   2  -1   1  545.15   34.90
   2  -1   1  605.74   33.10
   2  -1   1  592.84   32.70
   2  -1   1  584.74   29.90
   2  -1   1  681.63   31.80
   1  -1   1  144.39   10.30
   1  -1   1  150.28   11.00
   1  -1   1  159.58   11.20
   1  -1   1  169.28   12.10
   1  -1   1  144.59    8.70
   0   1  -1    1.00    1.20
   0  -1   1   -0.30    1.50
   0  -1   1   -1.50    1.70
   0  -1   1   -0.30    2.00
   0  -1   1    0.30    2.10
   0  -1   1    4.10    2.60
   0  -1   1    0.10    1.30
   1   1  -1   69.29    5.30
   1   1  -1   72.69    5.60
  -1  -1   1   75.39    5.40
  -1  -1   1   75.39    5.10
  -1  -1   1   60.79    5.20
  -1  -1   1   68.49    6.40
   2   1  -1   49.80    6.30
   2   1  -1   56.09    7.00
   2   1  -1   49.30    6.80
  -2  -1   1   50.49    7.00
  -2  -1   1   47.40    7.30
  -2  -1   1   49.20    5.30
   3   1  -1  408.36   25.40
   3   1  -1  518.75   33.20
   3   1  -1  422.66   26.20
   3   1  -1  434.06   24.50
  -3  -1   1  443.76   25.20
  -3  -1   1  404.46   23.40
  -3  -1   1  423.06   27.90
   4   1  -1 1495.75   75.59
   4   1  -1 1514.25   78.19
   4   1  -1 1491.45   77.49
   4   1  -1 1545.55   72.69
   4   1  -1 1510.95   84.19
  -4  -1   1 1525.45   75.09
  -4  -1   1 1531.05   74.29
  -4  -1   1 1497.45   77.79
   5   1  -1 2069.19  104.59
   5   1  -1 2124.39  108.29
   5   1  -1 2026.10  107.19
   5   1  -1 2166.68  101.59
   5   1  -1 2116.79  115.39
  -5  -1   1 2138.39  103.69
  -5  -1   1 2172.28  103.19
  -5  -1   1 2108.69  107.39
   6   1  -1  483.65   35.20
   6   1  -1  504.65   27.50
   6   1  -1  480.55   34.30
   6   1  -1  497.95   45.50
   6   1  -1  498.55   31.10
  -6  -1   1  508.45   29.50
  -6  -1   1  520.15   37.20
   7   1  -1  709.83   49.20
   7   1  -1  793.32   61.49
   7   1  -1  732.63   44.40
   7   1  -1  770.32   40.70
   7   1  -1  745.03   48.70
  -7  -1   1  790.12   43.00
  -7  -1   1  840.42   51.19
   8   1  -1  876.91   70.49
   8   1  -1  856.11   56.99
   8   1  -1  885.21   56.39
   8   1  -1  815.92   50.49
   8   1  -1  863.91   46.30
  -8  -1   1  903.01   58.49
  -8  -1   1  888.61   49.40
   9   1  -1  107.49   20.70
   9   1  -1  127.09   23.80
   9   1  -1  121.49   34.10
   9   1  -1  130.39   14.90
   9   1  -1  114.29   17.80
  -9  -1   1  106.69   16.40
  -9  -1   1  113.99   25.00
  10   1  -1  390.56   33.90
  10   1  -1  400.76   42.80
  10   1  -1  455.65   43.60
  10   1  -1  412.26   59.19
 -10  -1   1  457.75   34.00
 -10  -1   1  503.65   46.20
  11   1  -1  328.17   41.60
  11   1  -1  273.67   29.60
  11   1  -1  345.87   42.30
 -11  -1   1  259.27   41.70
 -11  -1   1  305.57   29.80
  12   1  -1   41.00   22.80
  12   1  -1   76.59   27.20
  12   1  -1   21.90   14.10
 -12  -1   1   11.10   23.30
 -12  -1   1   36.80   17.60
  13   1  -1    8.20   21.30
  13   1  -1  -18.70   20.20
  13   1  -1    6.30   19.50
 -13  -1   1  -19.50   24.00
 -13  -1   1   -2.60   16.40
 -11   2   0   71.49   27.10
  11  -2   0   21.60   35.80
  11  -2   0   79.39   28.00
  11  -2   0   67.49   27.20
 -10   2   0   54.39   23.90
  10  -2   0  129.39   20.30
  10  -2   0   70.79   25.20
  10  -2   0   70.09   26.50
  10  -2   0   86.49   24.50
  10  -2   0   27.60   34.80
  -9   2   0   55.69   22.70
   9  -2   0   26.90   29.00
   9  -2   0   68.89   21.30
   9  -2   0   45.10   11.40
   9  -2   0   53.59   14.60
   9  -2   0   44.30   20.00
  -8   2   0  231.98   40.00
   8  -2   0  288.57   26.40
   8  -2   0  308.27   48.90
   8  -2   0  267.27   33.60
   8  -2   0  272.37   35.10
   8  -2   0  278.07   26.30
  -7   2   0 1067.59   68.29
   7  -2   0 1067.19   60.29
   7  -2   0 1181.38   68.19
   7  -2   0 1098.09   68.09
   7  -2   0 1038.50   60.39
   7  -2   0 1138.39   80.59
  -6   2   0  908.61   54.09
   6  -2   0  830.02   52.79
   6  -2   0  796.32   51.99
   6  -2   0  802.12   46.90
   6  -2   0  846.62   63.29
   6  -2   0  778.42   46.30
  -5   2   0  343.67   29.00
  -4   2   0  135.49   18.00
   4  -2   0  132.79   13.50
   4  -2   0  141.39   18.40
   4  -2   0   90.99   18.90
   4  -2   0  149.69   15.10
   4  -2   0  129.29   16.80
  -3   2   0  702.33   37.10
   3  -2   0  725.63   36.70
   3  -2   0  672.13   39.10
   3  -2   0  608.04   43.00
   3  -2   0  647.14   35.20
   3  -2   0  613.34   38.10
  -2   2   0  106.89   11.30
   2  -2   0  107.99   12.40
   2  -2   0  110.59   16.40
   2  -2   0   99.99   13.40
   2  -2   0  104.49   11.50
   2  -2   0  114.89    9.70
  -1   2   0  437.56   22.30
   1  -2   0  433.46   25.80
   1  -2   0  411.86   24.40
   0   2   0 6721.73  337.77
   0  -2   0 7157.38  338.07
   0  -2   0 7292.87  338.67
   0  -2   0 7711.73  339.07
   1   2   0 1146.49   55.79
   1   2   0 1233.58   54.49
   1   2   0 1041.00   54.39
  -1  -2   0 1201.18   54.59
  -1  -2   0 1101.79   54.49
  -1  -2   0 1041.30   54.09
  -1  -2   0 1164.28   56.19
   2   2   0  798.92   38.70
   2   2   0  807.52   41.70
   2   2   0  780.92   38.70
   2   2   0  841.62   39.50
   2   2   0  672.43   39.30
  -2  -2   0  695.13   39.60
  -2  -2   0  789.32   37.80
  -2  -2   0  740.73   37.70
  -2  -2   0  760.62   37.10
  -2  -2   0  788.02   38.80
   3   2   0 2863.41  141.49
   3   2   0 2755.72  135.89
   3   2   0 2971.70  137.09
   3   2   0 2818.32  135.19
  -3  -2   0 2798.92  134.19
  -3  -2   0 2810.02  136.29
  -3  -2   0 2727.73  136.09
   4   2   0  825.22   44.60
   4   2   0  775.52   51.39
   4   2   0  818.82   43.00
   4   2   0  782.52   39.80
   4   2   0  863.91   45.90
  -4  -2   0  793.72   45.30
  -4  -2   0  811.92   43.60
  -4  -2   0  828.82   41.80
   5   2   0  227.68   28.40
   5   2   0  230.18   13.80
   5   2   0  228.38   19.60
   5   2   0  204.48   20.10
   5   2   0  226.08   17.30
  -5  -2   0  230.58   16.00
  -5  -2   0  218.18   22.10
  -5  -2   0  221.38   17.40
   6   2   0 1131.09   53.39
   6   2   0 1088.29   61.39
   6   2   0 1057.29   56.89
   6   2   0 1078.09   69.99
   6   2   0  978.30   59.39
  -6  -2   0 1021.60   55.79
  -6  -2   0 1061.59   55.09
  -6  -2   0 1082.99   60.39
   7   2   0  160.48   28.20
   7   2   0  155.18   16.30
   7   2   0  148.89   12.20
   7   2   0  142.29   19.30
   7   2   0  142.99   20.80
  -7  -2   0  118.19   18.40
  -7  -2   0  141.59   15.10
   8   2   0  726.03   61.49
   8   2   0  752.52   39.90
   8   2   0  705.93   43.90
   8   2   0  717.33   48.90
   8   2   0  751.82   50.89
  -8  -2   0  744.83   50.99
  -8  -2   0  719.33   42.70
   9   2   0  819.92   50.99
   9   2   0  828.92   57.49
   9   2   0  868.11   72.09
   9   2   0  841.42   59.19
   9   2   0  859.71   46.10
  -9  -2   0  882.71   59.29
  -9  -2   0  865.11   49.99
  10   2   0  291.87   50.69
  10   2   0  264.77   36.30
  10   2   0  269.17   35.20
  10   2   0  255.37   26.40
 -10  -2   0  272.07   26.90
 -10  -2   0  297.77   39.60
  11   2   0   57.09   34.40
  11   2   0   75.89   15.80
  11   2   0  106.19   24.00
  11   2   0   83.19   24.70
 -11  -2   0   85.09   17.80
 -11  -2   0   81.59   24.70
  12   2   0  190.58   26.20
  12   2   0  192.48   31.60
  12   2   0  194.38   33.20
 -12  -2   0  133.09   29.40
 -12  -2   0  262.27   28.30
  13   2   0  139.59   31.50
  13   2   0  169.08   31.80
 -13  -2   0   89.59   28.60
 -13  -2   0  211.78   29.60
 -11   3   1   24.90   25.60
  11  -3  -1   81.49   31.10
  11  -3  -1  100.29   30.40
 -10   3   1   45.50   23.90
  10  -3  -1   -2.20   17.10
  10  -3  -1   44.20   23.10
  10  -3  -1   69.09   24.80
  -9   3   1   40.70   23.30
   9  -3  -1   47.10   33.20
   9  -3  -1   91.69   24.20
   9  -3  -1   94.79   16.50
   9  -3  -1   76.79   24.50
   9  -3  -1   47.40   16.30
  -8   3   1  218.48   38.00
   8  -3  -1  189.68   25.00
   8  -3  -1  138.09   37.10
   8  -3  -1  269.47   33.30
   8  -3  -1  213.88   25.60
   8  -3  -1  170.48   27.80
  -7   3   1   79.49   23.50
   7  -3  -1   45.80   16.30
   7  -3  -1   27.20   25.10
   7  -3  -1   54.09   13.20
   7  -3  -1   57.59   17.00
   7  -3  -1   53.49   14.00
  -6   3   1   30.90   18.60
   6  -3  -1   54.69   24.10
   6  -3  -1   23.20   13.50
   6  -3  -1   30.10   14.40
   6  -3  -1   30.20   11.20
   6  -3  -1   28.00   12.00
  -5   3   1  156.28   25.30
   5  -3  -1  147.69   19.80
   5  -3  -1  166.18   29.30
   5  -3  -1  151.18   17.10
   5  -3  -1  149.29   20.10
   5  -3  -1  159.28   19.80
  -4   3   1  711.23   43.30
   4  -3  -1  690.23   39.70
   4  -3  -1  721.13   41.80
   4  -3  -1  733.03   44.50
   4  -3  -1  697.93   51.49
   4  -3  -1  708.43   43.00
  -3   3   1  477.75   33.00
   3  -3  -1  523.45   40.00
   3  -3  -1  563.04   33.80
   3  -3  -1  604.34   33.90
   3  -3  -1  573.94   34.80
   3  -3  -1  565.44   31.30
  -2   3   1 1168.98   58.69
  -2   3   1 1125.49   60.29
   2  -3  -1 1120.39   65.39
   2  -3  -1 1230.88   59.69
   2  -3  -1 1193.38   62.19
   2  -3  -1 1254.07   61.69
   2  -3  -1 1279.97   61.59
  -1   3   1 1846.92   85.29
  -1   3   1 2035.60   85.79
   1  -3  -1 1650.73   86.79
   1  -3  -1 1517.65   86.09
   1  -3  -1 1785.02   88.89
   0  -3  -1  358.76   20.20
   0  -3  -1  316.67   18.40
   0  -3  -1  317.47   18.30
   1   3   1 6278.87  319.97
   1   3   1 7246.88  321.17
  -1  -3  -1 6342.87  319.97
  -1  -3  -1 7402.16  320.67
  -1  -3  -1 7356.46  321.87
  -1  -3  -1 6287.57  319.77
   2   3   1 2287.67  105.09
   2   3   1 2082.39  106.09
   2   3   1 2298.87  105.09
   2   3   1 2123.09  107.89
   2   3   1 2160.68  104.59
  -2  -3  -1 2256.37  104.49
  -2  -3  -1 2254.87  104.69
  -2  -3  -1 2188.98  104.99
  -2  -3  -1 2067.89  106.49
  -2  -3  -1 2223.78  104.59
  -2  -3  -1 2200.78  104.69
   3   3   1 1031.50   50.59
   3   3   1  985.50   48.60
   3   3   1 1004.10   47.00
   3   3   1  949.90   49.10
   3   3   1  910.01   54.29
   3   3   1  909.71   49.70
  -3  -3  -1  971.70   47.90
  -3  -3  -1  991.40   47.80
  -3  -3  -1  975.30   47.90
  -3  -3  -1  915.71   49.70
  -3  -3  -1  921.51   50.09
   4   3   1 1592.24   78.39
   4   3   1 1497.95   77.49
   4   3   1 1558.64   84.99
   4   3   1 1561.74   74.49
   4   3   1 1621.64   77.29
   4   3   1 1600.04   79.89
  -4  -3  -1 1523.55   78.29
  -4  -3  -1 1453.05   77.79
  -4  -3  -1 1559.24   75.99
   5   3   1 1188.48   59.59
   5   3   1 1161.38   56.29
   5   3   1 1210.68   63.29
   5   3   1 1208.28   70.29
   5   3   1 1183.58   61.59
  -5  -3  -1 1065.09   61.09
  -5  -3  -1 1056.99   59.79
  -5  -3  -1 1129.79   57.99
   6   3   1   42.10   17.50
   6   3   1   33.70    9.60
   6   3   1   39.30    5.60
   6   3   1   48.10    8.80
   6   3   1   43.50   11.40
  -6  -3  -1   31.80    8.40
  -6  -3  -1   36.80    7.80
  -6  -3  -1   20.40   12.10
   7   3   1  192.98   13.80
   7   3   1  196.38   17.70
   7   3   1  171.48   22.20
   7   3   1  182.78   29.60
   7   3   1  186.58   20.90
  -7  -3  -1  171.08   17.90
  -7  -3  -1  183.48   25.10
  -7  -3  -1  167.08   16.20
   8   3   1   24.00   12.50
   8   3   1   23.30    8.90
   8   3   1   20.00   18.00
   8   3   1   27.50   11.30
   8   3   1   25.10    6.60
  -8  -3  -1   24.90    9.20
  -8  -3  -1   23.80   15.40
   9   3   1   47.80   18.70
   9   3   1   50.49   15.60
   9   3   1   76.39   13.90
   9   3   1   73.49   27.00
   9   3   1   79.69   12.50
  -9  -3  -1   47.20   19.30
  -9  -3  -1   30.80   12.70
  10   3   1  338.77   52.79
  10   3   1  298.87   28.60
  10   3   1  355.16   40.30
  10   3   1  348.07   36.60
 -10  -3  -1  342.57   29.80
 -10  -3  -1  354.46   42.40
  11   3   1  535.05   66.59
  11   3   1  570.54   51.49
  11   3   1  648.14   51.39
  11   3   1  494.45   39.50
 -11  -3  -1  645.24   52.49
 -11  -3  -1  589.74   40.70
  12   3   1  113.79   18.70
  12   3   1  154.38   30.40
  12   3   1  134.69   26.90
  12   3   1  122.59   44.30
 -12  -3  -1   91.69   26.70
 -12  -3  -1  129.29   20.70
  13   3   1   50.99   23.60
  13   3   1   16.30   20.30
 -13  -3  -1   28.40   16.20
 -13  -3  -1    9.90   23.20
  10  -4  -2   31.20   20.00
  10  -4  -2   38.40   26.90
  10  -4  -2  162.08   25.00
  10  -4  -2   92.89   28.60
  -9   4   2    8.10   21.90
   9  -4  -2   35.80   17.00
   9  -4  -2   35.80   20.90
   9  -4  -2   48.10   15.10
   9  -4  -2   41.50   23.20
  -8   4   2   66.09   24.50
   8  -4  -2  144.89   20.80
   8  -4  -2  143.39   21.80
   8  -4  -2  117.79   25.70
   8  -4  -2  142.49   27.30
  -7   4   2  395.76   44.90
   7  -4  -2  388.06   56.49
   7  -4  -2  505.15   41.70
   7  -4  -2  504.75   38.50
   7  -4  -2  527.95   36.70
   7  -4  -2  489.75   43.00
  -6   4   2 1064.19   64.79
   6  -4  -2 1027.10   58.99
   6  -4  -2 1065.89   63.49
   6  -4  -2  982.60   59.69
   6  -4  -2 1022.10   75.09
   6  -4  -2 1059.39   65.19
  -5   4   2   54.19   17.00
   5  -4  -2   16.90    9.80
   5  -4  -2   37.30   13.90
   5  -4  -2   23.00   10.80
   5  -4  -2   19.20   12.30
   5  -4  -2   24.60   19.00
  -4   4   2  390.16   32.40
   4  -4  -2  456.55   31.10
   4  -4  -2  462.25   28.80
   4  -4  -2  475.95   33.70
   4  -4  -2  445.66   32.40
   4  -4  -2  415.56   39.70
  -3   4   2 1294.47   65.49
   3  -4  -2 1197.48   63.89
   3  -4  -2 1284.67   71.99
   3  -4  -2 1190.58   65.49
  -2   4   2 1751.02   80.49
  -2   4   2 1748.72   80.99
   2  -4  -2 1727.13   85.79
   2  -4  -2 1483.45   80.59
   2  -4  -2 1524.65   81.79
   2  -4  -2 1697.43   82.69
   2  -4  -2 1483.75   83.09
  -1   4   2  144.09   12.00
  -1   4   2  158.78   11.00
   1  -4  -2  111.09   11.20
   1  -4  -2  122.39   13.20
   1  -4  -2  125.19   11.50
   0   4   2  152.18   11.70
   0  -4  -2  121.19   11.80
   0  -4  -2  121.59   10.10
   0  -4  -2   89.79    9.20
   1   4   2   35.10    4.70
   1   4   2   28.30    5.90
  -1  -4  -2   47.40    6.00
  -1  -4  -2   40.80    6.60
   2   4   2 1548.65   75.79
   2   4   2 1690.13   75.39
   2   4   2 1615.74   74.99
   2   4   2 1447.06   76.79
   2   4   2 1417.26   76.19
  -2  -4  -2 1537.15   74.99
  -2  -4  -2 1429.76   76.89
  -2  -4  -2 1691.63   74.69
  -2  -4  -2 1575.94   75.49
  -2  -4  -2 1444.66   73.89
  -2  -4  -2 1602.74   75.09
   3   4   2 3571.04  165.18
   3   4   2 3512.55  164.48
   3   4   2 3276.47  166.08
   3   4   2 3628.54  166.78
   3   4   2 3589.24  165.48
   3   4   2 3278.47  169.38
  -3  -4  -2 3445.36  164.48
  -3  -4  -2 3547.55  164.48
  -3  -4  -2 3334.87  166.98
  -3  -4  -2 3585.84  165.48
  -3  -4  -2 3279.27  164.68
  -3  -4  -2 3529.35  164.58
   4   4   2   65.49    7.40
   4   4   2   54.99    8.30
   4   4   2   33.00   12.30
   4   4   2   56.99    9.80
   4   4   2   43.50    6.50
   4   4   2   45.80    7.80
  -4  -4  -2   53.09    6.80
  -4  -4  -2   48.80    8.60
  -4  -4  -2   55.09    7.30
  -4  -4  -2   56.09    7.30
  -4  -4  -2   50.59    8.20
   5   4   2   15.00    6.80
   5   4   2   25.50    9.20
   5   4   2   26.90   13.20
   5   4   2   20.90    7.60
   5   4   2   30.10    6.90
  -5  -4  -2   21.00    6.30
  -5  -4  -2   31.90    9.60
  -5  -4  -2   18.00    6.90
   6   4   2  234.68   19.90
   6   4   2  262.87   19.30
   6   4   2  249.97   31.40
   6   4   2  254.97   15.90
   6   4   2  239.78   21.20
   6   4   2  239.78   23.60
  -6  -4  -2  244.98   20.70
  -6  -4  -2  270.87   24.90
  -6  -4  -2  267.97   18.60
   7   4   2  185.28   13.70
   7   4   2  195.88   31.30
   7   4   2  166.58   19.60
   7   4   2  182.08   16.90
   7   4   2  143.79   21.30
  -7  -4  -2  182.98   16.40
  -7  -4  -2  184.48   19.00
  -7  -4  -2  174.38   23.90
   8   4   2  559.14   30.80
   8   4   2  535.35   51.59
   8   4   2  491.95   37.90
   8   4   2  513.95   33.80
   8   4   2  499.85   40.40
  -8  -4  -2  540.25   35.40
  -8  -4  -2  550.04   41.60
  -8  -4  -2  542.25   33.30
   9   4   2 2485.65  114.99
   9   4   2 2184.98  126.19
   9   4   2 2201.48  118.19
   9   4   2 2405.76  124.79
   9   4   2 2223.68  137.59
  -9  -4  -2 2507.45  125.59
  -9  -4  -2 2283.07  117.29
  10   4   2 1068.39   84.49
  10   4   2 1077.79   61.99
  10   4   2 1090.69   72.29
  10   4   2 1121.89   69.69
 -10  -4  -2 1091.79   71.29
 -10  -4  -2 1063.29   61.49
  11   4   2   59.29   13.50
  11   4   2   62.19   32.00
  11   4   2   39.70   18.40
  11   4   2   52.49   17.50
 -11  -4  -2   40.90   21.30
 -11  -4  -2   47.70   13.70
  12   4   2   83.59   21.90
  12   4   2   89.99   26.60
  12   4   2   83.19   39.60
  12   4   2   89.89   16.40
 -12  -4  -2   78.29   17.60
 -12  -4  -2   67.39   24.00
  13   4   2    7.00   40.60
  13   4   2   85.69   26.90
  13   4   2   56.09   22.90
 -13  -4  -2   66.09   18.20
 -13  -4  -2   53.09   25.30
  10  -5  -3   37.20   15.20
  10  -5  -3  -19.80   19.30
  10  -5  -3  -10.00   24.70
   9  -5  -3  134.09   31.80
   9  -5  -3  118.19   25.10
   9  -5  -3  130.79   27.30
   8  -5  -3  931.21   58.79
   8  -5  -3  926.71   62.99
   8  -5  -3  835.92   56.29
   8  -5  -3  891.91   65.99
  -7   5   3  486.05   45.20
   7  -5  -3  362.26   36.60
   7  -5  -3  458.55   41.70
   7  -5  -3  568.64   39.70
   7  -5  -3  547.75   45.50
  -6   5   3  101.99   21.70
   6  -5  -3  106.39   16.60
   6  -5  -3   64.39   17.30
   6  -5  -3   86.39   19.10
   6  -5  -3   78.99   16.60
  -5   5   3  116.59   19.90
   5  -5  -3  104.69   19.00
   5  -5  -3  114.19   16.70
   5  -5  -3   98.39   18.40
   5  -5  -3  113.99   18.20
  -4   5   3  130.29   21.30
  -4   5   3  102.99   13.70
   4  -5  -3   81.09   15.00
   4  -5  -3   87.19   12.90
   4  -5  -3  126.29   16.90
   4  -5  -3   80.89   14.90
  -3   5   3  162.58   18.60
  -3   5   3  172.28   16.00
   3  -5  -3  182.18   22.40
   3  -5  -3  175.78   17.40
   3  -5  -3  181.58   17.40
   3  -5  -3  172.88   20.30
  -2   5   3 1830.02   84.09
  -2   5   3 1849.52   85.29
   2  -5  -3 1588.14   85.39
   2  -5  -3 1557.04   87.39
   2  -5  -3 1595.44   85.09
   2  -5  -3 1798.32   87.39
  -1   5   3  181.98   12.10
  -1   5   3  207.58   15.50
   1  -5  -3  174.18   16.40
   1  -5  -3  147.79   13.90
   1  -5  -3  168.28   13.80
   0   5   3    4.60    5.30
   0  -5  -3    5.90    4.70
   0  -5  -3    5.00    5.60
   0  -5  -3   16.80    6.00
   1   5   3   43.90    7.40
  -1  -5  -3   63.59    7.80
  -1  -5  -3   68.99    9.80
  -1  -5  -3   56.39    8.90
   2   5   3  131.69   13.10
   2   5   3  149.09   10.60
   2   5   3  124.79   11.40
  -2  -5  -3  151.68   11.70
  -2  -5  -3  122.09    8.40
  -2  -5  -3  139.39   11.00
  -2  -5  -3  143.29   10.60
  -2  -5  -3  137.79   11.90
   3   5   3   65.49    8.00
   3   5   3   37.90    8.60
   3   5   3   53.49    7.60
   3   5   3   66.19    9.20
   3   5   3   64.39   11.00
  -3  -5  -3   63.69    8.10
  -3  -5  -3   63.69    8.40
  -3  -5  -3   63.09   10.90
  -3  -5  -3   67.19    9.40
  -3  -5  -3   60.49    8.00
  -3  -5  -3   67.09    8.50
   4   5   3 4007.60  183.68
   4   5   3 3527.85  186.78
   4   5   3 3937.21  180.48
   4   5   3 3931.91  180.98
   4   5   3 3851.21  181.38
   4   5   3 3567.04  181.98
  -4  -5  -3 3848.72  180.18
  -4  -5  -3 3556.34  180.28
  -4  -5  -3 3809.22  181.78
  -4  -5  -3 3916.61  180.18
  -4  -5  -3 3619.74  183.18
  -4  -5  -3 3832.82  180.28
   5   5   3 6023.70  301.57
   5   5   3 6374.96  291.47
   5   5   3 6179.58  293.87
   5   5   3 6407.06  296.87
   5   5   3 5865.41  293.77
   5   5   3 6388.06  292.97
  -5  -5  -3 5959.30  292.87
  -5  -5  -3 5802.42  294.67
  -5  -5  -3 6303.57  293.77
  -5  -5  -3 6213.48  291.67
  -5  -5  -3 6298.37  291.87
   6   5   3  951.40   48.60
   6   5   3  967.80   50.99
   6   5   3 1051.99   56.79
   6   5   3  944.31   62.49
   6   5   3  901.21   52.09
   6   5   3  925.01   52.59
  -6  -5  -3  913.11   52.89
  -6  -5  -3  960.30   49.90
  -6  -5  -3  922.01   52.69
   7   5   3  264.27   35.00
   7   5   3  335.17   19.80
   7   5   3  283.27   28.00
   7   5   3  277.97   23.40
   7   5   3  303.07   22.10
   7   5   3  285.57   24.70
  -7  -5  -3  318.27   22.00
  -7  -5  -3  298.47   24.50
  -7  -5  -3  316.57   28.30
   8   5   3  339.87   32.70
   8   5   3  354.16   25.20
   8   5   3  332.17   42.40
   8   5   3  348.67   28.90
   8   5   3  357.96   22.30
  -8  -5  -3  326.27   34.30
  -8  -5  -3  316.97   25.00
  -8  -5  -3  335.77   27.80
   9   5   3   81.29   11.10
   9   5   3   93.69   17.10
   9   5   3   96.39   22.10
   9   5   3   90.09   28.90
   9   5   3  124.89   16.30
  -9  -5  -3   98.79   23.50
  -9  -5  -3   65.69   13.80
  -9  -5  -3   62.79   21.50
  10   5   3  108.19   31.80
  10   5   3  119.39   20.80
  10   5   3   90.99   23.60
  10   5   3  103.59   15.40
 -10  -5  -3   92.89   24.70
 -10  -5  -3   97.69   16.60
  11   5   3   27.60   15.10
  11   5   3   40.00   27.80
  11   5   3   17.90   10.30
  11   5   3   24.50   17.50
 -11  -5  -3   17.70   11.90
 -11  -5  -3   17.00   20.20
  12   5   3  -16.50   27.10
  12   5   3   19.40   14.40
  12   5   3   17.60    9.90
  12   5   3    5.50   18.30
 -12  -5  -3    7.50   20.20
 -12  -5  -3   -2.10   12.30
  13   5   3    7.70   37.50
  13   5   3   66.39   25.40
  13   5   3   52.79   21.60
 -13  -5  -3   74.09   25.90
 -13  -5  -3   41.50   16.80
   9  -6  -4  159.28   27.60
   9  -6  -4  145.09   32.50
   8  -6  -4  -13.10   15.50
   8  -6  -4   -4.20   19.00
   8  -6  -4   16.10   14.70
   7  -6  -4   69.49   22.20
   7  -6  -4   77.39   21.10
   7  -6  -4   56.59   17.70
   7  -6  -4   62.99   18.70
  -6   6   4  113.09   22.80
   6  -6  -4  210.48   26.90
   6  -6  -4  125.59   22.10
   6  -6  -4  169.98   25.50
  -5   6   4   23.70   16.00
   5  -6  -4   28.20   13.10
   5  -6  -4   57.99   14.30
   5  -6  -4   49.90   16.70
   5  -6  -4   36.80   16.60
  -4   6   4   18.50    8.40
  -4   6   4   -3.90   11.70
   4  -6  -4    4.60    9.40
   4  -6  -4   13.80   12.70
   4  -6  -4    7.90    8.50
   4  -6  -4   11.60   11.80
  -3   6   4   25.10    8.20
  -3   6   4    5.70    8.50
   3  -6  -4   23.70    8.20
   3  -6  -4   16.40    8.70
   3  -6  -4   14.90   11.60
   3  -6  -4    9.90    9.40
   2  -6  -4  286.07   22.20
   2  -6  -4  274.37   24.80
   2  -6  -4  301.17   25.40
   2  -6  -4  289.77   20.90
  -1   6   4   79.39    9.00
  -1   6   4   72.99   10.80
   1  -6  -4   91.99   12.70
   1  -6  -4  107.09   15.80
   1  -6  -4  104.99   13.60
   0   6   4  543.15   30.40
   0  -6  -4  443.66   28.20
   0  -6  -4  456.05   29.70
   0  -6  -4  498.05   29.60
   1   6   4  232.88   18.10
  -1  -6  -4  195.88   15.50
  -1  -6  -4  189.18   16.80
  -1  -6  -4  224.58   16.80
   2   6   4  885.51   44.20
   2   6   4  818.62   46.60
  -2  -6  -4  834.82   44.90
  -2  -6  -4  890.71   44.80
  -2  -6  -4  862.21   45.70
   3   6   4 1307.77   70.99
   3   6   4 1458.85   71.09
   3   6   4 1283.97   71.59
   3   6   4 1400.06   68.59
   3   6   4 1454.95   69.19
   3   6   4 1497.75   70.19
  -3  -6  -4 1471.75   68.09
  -3  -6  -4 1345.77   68.99
  -3  -6  -4 1260.57   67.09
  -3  -6  -4 1400.56   70.49
  -3  -6  -4 1397.36   69.29
   4   6   4  691.73   36.70
   4   6   4  642.54   34.40
   4   6   4  609.84   32.90
   4   6   4  596.64   33.40
   4   6   4  532.95   38.30
   4   6   4  561.54   35.40
  -4  -6  -4  551.44   36.00
  -4  -6  -4  589.94   34.20
  -4  -6  -4  611.34   32.80
  -4  -6  -4  588.54   32.90
  -4  -6  -4  584.44   32.50
  -4  -6  -4  627.44   32.70
   5   6   4  426.66   26.80
   5   6   4  424.26   25.80
   5   6   4  401.36   28.20
   5   6   4  427.46   25.30
   5   6   4  438.66   30.40
   5   6   4  403.86   34.40
  -5  -6  -4  406.66   28.70
  -5  -6  -4  421.46   24.80
  -5  -6  -4  426.46   26.40
  -5  -6  -4  365.96   26.10
  -5  -6  -4  402.46   25.10
  -5  -6  -4  406.16   25.00
   6   6   4 1801.52   91.29
   6   6   4 1768.12   85.79
   6   6   4 1727.43   84.49
   6   6   4 1694.33   86.99
   6   6   4 1681.03   97.09
   6   6   4 1651.03   87.39
  -6  -6  -4 1655.13   88.49
  -6  -6  -4 1637.24   86.49
  -6  -6  -4 1680.73   86.89
  -6  -6  -4 1718.53   84.79
  -6  -6  -4 1662.73   84.49
   7   6   4  366.76   22.90
   7   6   4  339.27   26.90
   7   6   4  345.27   27.60
   7   6   4  378.86   24.80
   7   6   4  317.17   38.40
   7   6   4  393.66   32.10
  -7  -6  -4  347.57   28.20
  -7  -6  -4  373.06   24.60
  -7  -6  -4  326.47   24.60
  -7  -6  -4  346.67   29.10
   8   6   4    8.90    5.50
   8   6   4   18.20    7.20
   8   6   4   12.60    8.70
   8   6   4   11.80   17.70
   8   6   4   16.00    9.30
   8   6   4   -1.30   11.60
  -8  -6  -4   10.90    8.60
  -8  -6  -4   21.60    9.80
  -8  -6  -4    9.70   15.40
   9   6   4  122.39   18.70
   9   6   4  135.19   16.70
   9   6   4  111.29   14.50
   9   6   4  166.28   34.50
   9   6   4  108.99   21.80
  -9  -6  -4  101.59   22.70
  -9  -6  -4  103.59   17.30
  -9  -6  -4  121.49   18.30
  10   6   4   46.10   15.40
  10   6   4   44.40   26.20
  10   6   4   57.99   19.80
  10   6   4   47.70   12.10
 -10  -6  -4   66.39   22.70
 -10  -6  -4   59.69   14.00
  11   6   4   20.40   13.00
  11   6   4   13.00    9.90
  11   6   4   12.00   24.00
  11   6   4    6.40   17.00
 -11  -6  -4   25.00   19.70
 -11  -6  -4    5.40   11.70
  12   6   4  126.69   21.30
  12   6   4  155.28   26.20
  12   6   4  158.08   30.60
  12   6   4  143.49   38.80
 -12  -6  -4  162.38   29.50
 -12  -6  -4  162.28   24.10
  13   6   4   95.19   28.40
  13   6   4  102.39   41.40
  13   6   4   91.99   23.40
 -13  -6  -4   71.09   26.90
 -13  -6  -4   69.09   18.00
   9  -7  -5   22.40   15.80
   9  -7  -5   -3.30   20.80
   9  -7  -5    1.00   23.60
   8  -7  -5  -32.20   16.50
   8  -7  -5    0.00   13.60
   8  -7  -5  -25.50   19.90
   7  -7  -5   53.39   21.60
   7  -7  -5   40.40   18.50
   7  -7  -5   57.79   20.00
   6  -7  -5   25.50   15.60
   6  -7  -5    6.70   16.80
   6  -7  -5    3.20   16.30
   5  -7  -5  -19.40   14.20
   5  -7  -5   -5.60   13.10
   5  -7  -5   -4.90   15.60
  -4   7   5   37.50   11.60
   4  -7  -5   51.59   14.00
   4  -7  -5   55.89   16.80
   4  -7  -5   47.30   16.00
   4  -7  -5   53.19   14.50
  -3   7   5  484.35   33.30
  -3   7   5  414.86   37.80
   3  -7  -5  534.35   37.60
   3  -7  -5  571.94   34.90
   3  -7  -5  547.25   33.30
   3  -7  -5  484.35   37.50
  -2   7   5 1831.72   98.29
  -2   7   5 2155.98  102.29
   2  -7  -5 2153.08  102.19
   2  -7  -5 1851.71  102.59
   2  -7  -5 2077.89  104.99
  -1   7   5 3003.50  130.69
   1  -7  -5 2506.25  130.49
   1  -7  -5 2540.75  129.79
   1  -7  -5 2408.56  128.39
   0   7   5   34.90    9.40
   0  -7  -5   30.00    9.50
   0  -7  -5   29.40    8.60
   0  -7  -5   32.70    8.30
   1   7   5 1616.54   83.29
  -1  -7  -5 1611.74   82.69
  -1  -7  -5 1637.44   82.79
  -1  -7  -5 1633.14   81.59
   2   7   5 4171.88  198.68
  -2  -7  -5 3956.10  196.48
  -2  -7  -5 4191.08  197.88
  -2  -7  -5 4085.29  196.38
   3   7   5  691.93   36.60
   3   7   5  612.24   38.50
   3   7   5  716.03   40.30
  -3  -7  -5  650.43   34.20
  -3  -7  -5  698.73   37.30
  -3  -7  -5  718.83   38.90
  -3  -7  -5  668.63   37.40
   4   7   5   62.99   10.40
   4   7   5   37.20    9.30
   4   7   5   23.60    8.10
   4   7   5   23.20    5.20
   4   7   5   47.90    7.70
   4   7   5   36.30    8.60
  -4  -7  -5   23.70    6.10
  -4  -7  -5   27.50    7.70
  -4  -7  -5   38.00    7.00
  -4  -7  -5   37.10    6.00
  -4  -7  -5   32.20    7.30
  -4  -7  -5   26.10    6.70
   5   7   5 1226.68   75.59
   5   7   5 1387.56   69.39
   5   7   5 1369.56   68.59
   5   7   5 1230.28   70.29
   5   7   5 1360.96   71.89
   5   7   5 1383.76   68.19
  -5  -7  -5 1300.77   67.69
  -5  -7  -5 1320.97   67.79
  -5  -7  -5 1447.96   67.79
  -5  -7  -5 1330.07   70.19
  -5  -7  -5 1314.37   71.99
  -5  -7  -5 1359.76   67.79
   6   7   5  767.42   49.20
   6   7   5  762.02   55.29
   6   7   5  826.82   47.30
   6   7   5  793.12   43.40
   6   7   5  831.92   45.40
   6   7   5  840.52   44.60
  -6  -7  -5  778.02   43.00
  -6  -7  -5  777.92   45.40
  -6  -7  -5  804.02   48.10
  -6  -7  -5  772.32   43.10
  -6  -7  -5  754.02   44.70
  -6  -7  -5  774.52   43.20
   7   7   5   -0.80   14.40
   7   7   5    3.50    9.00
   7   7   5   -3.10    5.20
   7   7   5   -7.10   11.00
   7   7   5   -0.40    7.40
   7   7   5    1.40    6.00
  -7  -7  -5   -3.70    7.70
  -7  -7  -5    0.20    4.40
  -7  -7  -5   -6.80    6.10
  -7  -7  -5   11.20   11.00
  -7  -7  -5   10.60    8.50
  -7  -7  -5    3.40    6.60
   8   7   5   83.29   18.60
   8   7   5   74.39   23.20
   8   7   5   74.39   13.40
   8   7   5   70.89   11.50
   8   7   5   53.89    9.40
   8   7   5   70.19   14.10
  -8  -7  -5   66.09   12.10
  -8  -7  -5   62.29   16.70
  -8  -7  -5   75.19   15.20
  -8  -7  -5   64.49   11.00
  -8  -7  -5   68.99   11.20
   9   7   5   12.90    8.50
   9   7   5   10.50   14.90
   9   7   5   13.90   20.60
   9   7   5   17.10   11.30
   9   7   5   15.00   11.00
   9   7   5   21.50    7.90
  -9  -7  -5    8.90   17.30
  -9  -7  -5   16.50    8.00
  -9  -7  -5   18.50   12.70
  -9  -7  -5   12.30   10.00
  10   7   5  119.29   17.20
  10   7   5  111.09   32.60
  10   7   5   94.69   22.90
  10   7   5  136.09   21.70
 -10  -7  -5  167.48   21.70
 -10  -7  -5  168.98   26.70
  11   7   5  247.88   30.00
  11   7   5  194.78   31.00
  11   7   5  233.78   43.30
  11   7   5  207.88   23.10
 -11  -7  -5  288.87   37.60
 -11  -7  -5  220.78   25.10
  12   7   5   29.90   16.00
  12   7   5   30.30   27.60
  12   7   5   49.00   20.30
 -12  -7  -5   29.30   13.70
 -12  -7  -5   36.80   22.30
  13   7   5  266.17   38.80
  13   7   5  226.08   48.00
  13   7   5  221.88   38.10
 -13  -7  -5  302.67   31.70
 -13  -7  -5  312.57   45.00
   8  -8  -6  -16.60   19.50
   8  -8  -6   11.60   15.50
   8  -8  -6    3.80   22.70
   7  -8  -6  336.17   38.50
   7  -8  -6  368.76   44.40
   7  -8  -6  346.67   39.10
   6  -8  -6  368.66   36.30
   6  -8  -6  256.67   37.00
   6  -8  -6  421.06   42.70
   5  -8  -6   67.89   16.60
   5  -8  -6   62.19   18.80
  -4   8   6  305.47   28.50
   4  -8  -6  383.66   37.20
   4  -8  -6  305.07   35.90
   4  -8  -6  380.86   32.70
  -3   8   6 1010.70   57.99
   3  -8  -6 1006.00   58.69
   3  -8  -6 1015.60   62.29
  -2   8   6  300.07   25.30
   2  -8  -6  235.38   26.40
   2  -8  -6  177.38   25.80
   2  -8  -6  242.28   23.90
  -1   8   6  189.58   22.70
   1  -8  -6  216.28   20.40
   1  -8  -6  231.48   23.50
   1  -8  -6  220.08   23.60
   0   8   6   32.40   10.10
   0  -8  -6   26.50    8.50
   0  -8  -6   28.30   10.60
   0  -8  -6   40.80   10.40
   1   8   6  289.57   23.80
  -1  -8  -6  240.98   20.30
  -1  -8  -6  246.28   21.50
  -1  -8  -6  247.18   22.00
   2   8   6  228.58   22.40
  -2  -8  -6  223.48   19.50
  -2  -8  -6  223.38   20.00
  -2  -8  -6  236.78   18.70
   3   8   6   50.69   11.00
  -3  -8  -6   49.70    8.60
  -3  -8  -6   49.99    8.70
  -3  -8  -6   38.80    7.70
   4   8   6   23.00   10.40
   4   8   6   19.90    4.90
   4   8   6   16.80    7.70
   4   8   6   27.70    9.00
  -4  -8  -6   25.40    8.10
  -4  -8  -6   30.70    7.30
  -4  -8  -6   26.70    7.40
  -4  -8  -6   33.30    5.70
  -4  -8  -6   23.90    6.60
  -4  -8  -6   13.00    5.80
   5   8   6  301.87   29.10
   5   8   6  346.27   22.90
   5   8   6  327.67   26.80
   5   8   6  310.17   26.70
   5   8   6  282.37   25.90
   5   8   6  363.56   22.10
  -5  -8  -6  310.37   21.70
  -5  -8  -6  339.77   22.80
  -5  -8  -6  308.57   22.40
  -5  -8  -6  336.17   24.60
  -5  -8  -6  332.57   22.00
  -5  -8  -6  304.37   26.40
   6   8   6  627.74   42.00
   6   8   6  695.43   39.40
   6   8   6  671.43   38.00
   6   8   6  604.44   48.00
   6   8   6  688.13   40.60
   6   8   6  599.64   43.20
  -6  -8  -6  680.83   38.20
  -6  -8  -6  692.33   38.40
  -6  -8  -6  623.14   38.80
  -6  -8  -6  690.53   38.20
  -6  -8  -6  666.23   43.20
  -6  -8  -6  683.03   40.70
   7   8   6  108.99   13.70
   7   8   6  120.79   17.40
   7   8   6   71.59   20.40
   7   8   6  120.99   17.20
   7   8   6   86.69   15.10
   7   8   6   98.19   18.00
  -7  -8  -6  107.29   14.80
  -7  -8  -6  108.89   19.50
  -7  -8  -6  100.49   15.20
  -7  -8  -6   83.69   11.90
  -7  -8  -6   84.69   13.00
  -7  -8  -6  116.79   15.40
   8   8   6  404.66   38.60
   8   8   6  453.55   36.10
   8   8   6  434.56   30.20
   8   8   6  481.35   30.20
   8   8   6  448.96   32.40
   8   8   6  467.25   48.30
  -8  -8  -6  454.15   30.00
  -8  -8  -6  401.26   30.30
  -8  -8  -6  424.56   35.50
  -8  -8  -6  433.46   31.30
  -8  -8  -6  449.16   30.20
  -8  -8  -6  433.96   36.20
   9   8   6 2166.08  132.49
   9   8   6 2200.78  111.29
   9   8   6 2215.98  116.69
   9   8   6 2261.57  122.19
   9   8   6 2149.78  114.89
   9   8   6 2256.07  112.59
  -9  -8  -6 2333.57  117.69
  -9  -8  -6 2165.68  114.69
  -9  -8  -6 2091.29  111.09
  -9  -8  -6 2216.68  118.69
  -9  -8  -6 2158.08  111.39
  -9  -8  -6 2242.28  111.99
  10   8   6 1514.15   83.99
  10   8   6 1512.85  103.19
  10   8   6 1526.55   80.09
  10   8   6 1487.25   90.49
 -10  -8  -6 1417.86   78.69
 -10  -8  -6 1438.16   82.89
 -10  -8  -6 1440.06   78.79
 -10  -8  -6 1459.45   79.29
 -10  -8  -6 1545.55   87.19
  11   8   6   30.90   25.50
  11   8   6   26.40   18.70
  11   8   6   25.50   10.50
  11   8   6   28.20   13.10
 -11  -8  -6   19.40   10.70
 -11  -8  -6   23.20   19.10
 -11  -8  -6   16.20   12.40
  12   8   6  152.98   39.20
  12   8   6  141.29   29.60
  12   8   6  133.29   22.70
 -12  -8  -6   91.69   18.50
 -12  -8  -6   87.49   24.80
  13   8   6  183.98   27.50
  13   8   6  142.09   32.20
  13   8   6  153.08   43.30
 -13  -8  -6  110.09   29.40
 -13  -8  -6  127.79   21.90
   7  -9  -7    1.80   18.50
   7  -9  -7   23.90   20.90
   7  -9  -7   -5.30   17.60
   6  -9  -7  136.39   25.00
   6  -9  -7  138.39   28.30
   6  -9  -7   68.89   22.60
   5  -9  -7  441.16   39.00
   5  -9  -7  311.67   38.60
   5  -9  -7  477.45   44.70
  -4   9   7   88.29   18.70
   4  -9  -7  114.89   21.00
  -3   9   7  -17.80   11.00
   3  -9  -7    0.10   14.40
   3  -9  -7    3.90   14.80
   3  -9  -7    3.90   12.70
  -2   9   7  -18.80   11.20
   2  -9  -7    9.60   13.00
   2  -9  -7   -1.60   12.20
   2  -9  -7    5.70   11.50
  -1   9   7    6.10   11.40
   1  -9  -7   27.20   11.90
   1  -9  -7   19.50   11.80
   1  -9  -7   23.70   13.10
   0   9   7   57.59   13.30
   0  -9  -7   59.09   13.30
   0  -9  -7   40.10   11.80
   0  -9  -7   63.49   12.50
   1   9   7  196.88   23.00
  -1  -9  -7  204.48   19.50
  -1  -9  -7  201.78   21.40
  -1  -9  -7  180.78   20.50
   2   9   7 1121.59   60.79
  -2  -9  -7 1107.19   57.29
  -2  -9  -7 1035.90   57.99
  -2  -9  -7  955.10   57.99
   3   9   7  208.08   23.30
   4   9   7  208.78   23.60
   4   9   7  225.58   17.10
   4   9   7  214.68   21.90
  -4  -9  -7  222.08   18.90
  -4  -9  -7  240.88   21.10
  -4  -9  -7  195.08   15.00
  -4  -9  -7  229.18   20.10
   5   9   7  691.83   47.70
   5   9   7  785.42   44.60
   5   9   7  682.13   45.70
   5   9   7  725.63   46.60
   5   9   7  721.53   40.30
  -5  -9  -7  720.63   41.10
  -5  -9  -7  791.72   40.20
  -5  -9  -7  685.53   45.70
  -5  -9  -7  755.62   44.20
  -5  -9  -7  696.23   40.90
  -5  -9  -7  687.13   39.40
   6   9   7    7.00    5.80
   6   9   7    9.90   12.40
   6   9   7   24.60   11.70
   6   9   7   13.90    8.60
   6   9   7    6.20   12.10
   6   9   7    4.20   10.70
  -6  -9  -7    7.90    6.80
  -6  -9  -7    2.90    8.30
  -6  -9  -7   18.70    9.10
  -6  -9  -7    9.90    7.70
  -6  -9  -7    8.10    8.60
  -6  -9  -7   13.90    9.50
   7   9   7  230.38   20.40
   7   9   7  237.88   34.80
   7   9   7  261.57   23.10
   7   9   7  178.38   28.20
   7   9   7  301.47   26.70
   7   9   7  248.98   29.30
  -7  -9  -7  230.48   21.60
  -7  -9  -7  289.17   23.10
  -7  -9  -7  247.88   24.90
  -7  -9  -7  239.98   27.70
  -7  -9  -7  259.17   22.50
  -7  -9  -7  258.77   23.30
   8   9   7  731.03   46.10
   8   9   7  788.62   61.89
   8   9   7  732.23   45.60
   8   9   7  760.22   43.50
   8   9   7  714.63   49.90
   8   9   7  687.43   52.29
  -8  -9  -7  726.83   50.19
  -8  -9  -7  684.73   43.60
  -8  -9  -7  742.53   43.50
  -8  -9  -7  733.13   45.80
  -8  -9  -7  688.83   47.00
  -8  -9  -7  692.03   43.10
   9   9   7   36.70   12.00
   9   9   7   41.80   14.50
   9   9   7   57.69   25.50
   9   9   7   53.99   16.80
   9   9   7   58.99   12.20
   9   9   7   40.50   19.80
  -9  -9  -7   59.49   18.10
  -9  -9  -7   41.10   11.20
  -9  -9  -7   28.60   11.50
  -9  -9  -7   47.50   13.50
  -9  -9  -7   48.60   16.90
  -9  -9  -7   50.79   12.40
  10   9   7   13.90   17.10
  10   9   7   18.70    9.70
  10   9   7    7.50   12.70
  10   9   7   24.10   12.70
  10   9   7   33.50   22.70
 -10  -9  -7   25.90   17.70
 -10  -9  -7   16.60   10.00
 -10  -9  -7   17.40   11.10
 -10  -9  -7   28.70   11.20
 -10  -9  -7   27.70   12.20
  11   9   7   19.20   12.20
  11   9   7   20.40    9.90
  11   9   7   35.10   20.00
  11   9   7   26.50   23.50
 -11  -9  -7    7.90   10.00
 -11  -9  -7   11.20   12.10
 -11  -9  -7   24.70   19.10
 -11  -9  -7    3.30   10.00
  12   9   7   23.00   20.60
  12   9   7    2.90   13.40
  12   9   7   19.60   24.90
 -12  -9  -7  -12.80   12.50
 -12  -9  -7   -2.80   10.90
 -12  -9  -7    8.90   19.10
  13   9   7   45.60   26.20
  13   9   7   43.10   31.80
  13   9   7   64.99   18.40
 -13  -9  -7   36.40   14.70
 -13  -9  -7   46.60   24.60
 -13  -9  -7   19.90   16.10
   6 -10  -8  -17.10   18.70
   6 -10  -8   -3.30   20.80
   6 -10  -8   -0.80   18.70
   5 -10  -8  -27.10   16.70
   5 -10  -8  -26.70   16.00
   5 -10  -8  -10.70   18.80
   4 -10  -8   19.50   16.20
   4 -10  -8   -0.60   17.60
   4 -10  -8   26.90   19.40
  -3  10   8  104.79   18.30
   3 -10  -8   74.19   19.50
   3 -10  -8  148.29   25.30
   3 -10  -8  152.98   21.60
  -2  10   8  199.38   27.10
   2 -10  -8  197.68   28.90
   2 -10  -8  195.08   25.80
  -1  10   8   46.00   15.10
   1 -10  -8   57.99   18.60
   1 -10  -8   58.29   15.50
   1 -10  -8   64.09   16.20
   0  10   8   48.80   14.50
   0 -10  -8   41.60   12.90
   0 -10  -8   40.40   14.40
   0 -10  -8   22.20   12.10
   1  10   8   84.59   16.40
  -1 -10  -8   92.39   15.50
  -1 -10  -8  126.99   16.90
  -1 -10  -8  127.09   17.50
   2  10   8 1148.19   64.69
  -2 -10  -8 1131.29   62.09
  -2 -10  -8 1166.28   61.29
  -2 -10  -8  989.30   61.99
   3  10   8 1729.03   88.89
  -3 -10  -8 1603.34   83.59
  -3 -10  -8 1579.74   84.19
  -3 -10  -8 1583.54   86.49
   4  10   8  193.28   25.60
  -4 -10  -8  182.18   20.50
  -4 -10  -8  203.88   22.10
  -4 -10  -8  180.08   19.30
   5  10   8  352.06   23.40
   5  10   8  334.47   34.70
   5  10   8  326.67   31.60
  -5 -10  -8  339.57   28.00
  -5 -10  -8  322.47   25.10
  -5 -10  -8  318.97   25.80
  -5 -10  -8  330.97   30.00
   6  10   8  489.65   31.60
   6  10   8  480.95   39.20
   6  10   8  481.15   30.40
   6  10   8  517.85   40.30
  -6 -10  -8  465.75   32.20
  -6 -10  -8  520.15   31.60
  -6 -10  -8  480.05   32.60
  -6 -10  -8  453.95   37.90
  -6 -10  -8  487.55   32.20
  -6 -10  -8  471.25   34.70
   7  10   8  383.66   35.60
   7  10   8  312.57   32.60
   7  10   8  239.28   37.00
   7  10   8  299.87   25.80
   7  10   8  290.37   31.90
  -7 -10  -8  306.97   25.70
  -7 -10  -8  308.17   26.00
  -7 -10  -8  298.87   27.30
  -7 -10  -8  264.07   26.90
  -7 -10  -8  262.57   31.30
   8  10   8   84.29   18.20
   8  10   8   85.99   25.20
   8  10   8   91.09   15.70
   8  10   8  110.59   23.70
   8  10   8   68.29   11.50
   8  10   8   68.49   16.00
  -8 -10  -8   89.19   14.10
  -8 -10  -8   92.29   19.10
  -8 -10  -8   76.89   15.00
  -8 -10  -8   74.99   14.20
  -8 -10  -8   86.69   16.80
  -8 -10  -8   77.39   14.70
   9  10   8   94.29   19.60
   9  10   8  103.29   21.80
   9  10   8   98.29   16.80
   9  10   8  104.19   27.10
   9  10   8  101.29   14.20
   9  10   8  107.39   16.50
  -9 -10  -8  105.49   15.10
  -9 -10  -8  169.48   27.30
  -9 -10  -8   88.09   14.40
  -9 -10  -8  149.49   21.00
  -9 -10  -8  105.89   20.10
  -9 -10  -8   94.09   15.70
  10  10   8  428.46   37.60
  10  10   8  470.05   54.99
  10  10   8  407.16   43.20
  10  10   8  467.15   43.70
  10  10   8  447.66   32.10
  10  10   8  447.76   35.10
 -10 -10  -8  438.86   43.40
 -10 -10  -8  431.66   39.80
 -10 -10  -8  379.06   33.80
 -10 -10  -8  405.86   32.00
 -10 -10  -8  425.06   32.50
 -10 -10  -8  419.46   33.00
  11  10   8   28.20   18.50
  11  10   8   49.10   15.70
  11  10   8   24.60   22.00
  11  10   8   52.19   26.90
 -11 -10  -8   43.40   13.40
 -11 -10  -8   40.00   19.70
 -11 -10  -8   24.10   12.50
 -11 -10  -8   28.20   14.30
  12  10   8   68.99   29.50
  12  10   8   60.79   17.10
  12  10   8   47.90   24.90
 -12 -10  -8   49.90   16.80
 -12 -10  -8   55.49   15.60
 -12 -10  -8   71.39   23.00
  13  10   8  153.78   33.70
  13  10   8  247.98   34.40
  13  10   8  197.98   42.40
 -13 -10  -8  138.59   21.70
 -13 -10  -8  152.28   23.50
 -13 -10  -8  148.59   29.50
   5 -11  -9   42.00   21.60
   5 -11  -9   57.89   25.70
   5 -11  -9   14.10   20.40
   4 -11  -9   58.69   23.00
   4 -11  -9   26.10   18.10
   4 -11  -9   15.00   19.20
  -3  11   9   32.60   15.50
   3 -11  -9   34.50   19.20
   3 -11  -9   71.89   19.40
   3 -11  -9   50.99   22.10
  -2  11   9  481.05   41.60
   2 -11  -9  593.34   46.10
   2 -11  -9  627.24   43.50
  -1  11   9  331.37   34.00
   1 -11  -9  405.46   34.00
   1 -11  -9  319.77   35.00
   0  11   9   31.40   15.40
   0 -11  -9   48.70   16.60
   0 -11  -9   58.99   15.20
   0 -11  -9   31.70   14.30
   1  11   9  198.38   28.60
  -1 -11  -9  236.08   24.50
  -1 -11  -9  160.38   25.10
  -1 -11  -9  226.18   25.40
   2  11   9  316.77   32.50
  -2 -11  -9  205.68   26.90
  -2 -11  -9  255.87   26.60
  -2 -11  -9  309.07   26.10
   3  11   9    4.70   13.70
  -3 -11  -9   11.30   11.00
  -3 -11  -9   12.70   10.20
  -3 -11  -9    5.70   11.70
   4  11   9    4.80   12.90
  -4 -11  -9    1.30    9.70
  -4 -11  -9    3.20    9.50
  -4 -11  -9    6.50   10.50
   5  11   9    8.70   12.60
  -5 -11  -9   16.50   11.70
  -5 -11  -9   -5.00    8.80
  -5 -11  -9   11.00   10.20
  -5 -11  -9    4.90   10.00
   6  11   9   48.30   15.70
   6  11   9   44.30   18.30
   6  11   9   37.00    9.10
  -6 -11  -9   40.30   10.80
  -6 -11  -9   28.00   10.80
  -6 -11  -9   30.70   13.50
  -6 -11  -9   33.30   10.60
   7  11   9   40.00   12.30
   7  11   9   38.90   16.00
   7  11   9   34.60   17.40
   7  11   9   50.59   11.20
  -7 -11  -9   57.09   13.00
  -7 -11  -9   53.19   12.90
  -7 -11  -9   33.70   12.00
  -7 -11  -9   35.70   15.50
   8  11   9  271.27   34.80
   8  11   9  192.48   31.00
   8  11   9  290.97   26.20
  -8 -11  -9  279.27   24.90
  -8 -11  -9  242.88   27.10
  -8 -11  -9  246.08   33.10
  -8 -11  -9  262.07   25.40
   9  11   9   37.50   20.20
   9  11   9    9.30   15.90
   9  11   9   -0.60   13.40
   9  11   9   15.90    9.30
   9  11   9   16.20   11.70
  -9 -11  -9   18.00   15.00
  -9 -11  -9   23.60   12.80
  -9 -11  -9   29.20   11.20
  -9 -11  -9   10.90   12.10
  -9 -11  -9   14.20   16.20
  -9 -11  -9   32.90   12.00
  10  11   9  176.78   28.10
  10  11   9  213.28   22.30
  10  11   9  246.28   37.60
  10  11   9  252.17   26.60
  10  11   9  206.68   43.80
 -10 -11  -9  214.18   24.50
 -10 -11  -9  216.58   31.60
 -10 -11  -9  199.48   25.00
 -10 -11  -9  162.48   24.40
 -10 -11  -9  205.58   25.00
 -10 -11  -9  219.78   36.10
  11  11   9  564.74   41.60
  11  11   9  529.25   61.99
  11  11   9  491.95   50.39
 -11 -11  -9  483.15   37.90
 -11 -11  -9  478.85   38.70
 -11 -11  -9  531.15   46.40
  12  11   9   69.79   19.30
  12  11   9   66.99   29.90
  12  11   9   67.79   26.20
 -12 -11  -9   15.50   15.10
 -12 -11  -9   52.39   21.70
 -12 -11  -9   36.70   14.50
   4 -12 -10  172.08   32.00
   4 -12 -10  212.78   32.10
  -3  12  10    2.90   17.30
   3 -12 -10   43.60   19.30
   3 -12 -10   14.00   18.60
   3 -12 -10   44.10   21.70
  -2  12  10    2.10   15.60
   2 -12 -10   15.90   16.40
   2 -12 -10   10.90   17.60
   2 -12 -10  -14.90   16.20
  -1  12  10  149.19   23.50
   1 -12 -10  246.88   29.50
   1 -12 -10  101.09   22.70
   1 -12 -10  169.78   26.20
   0  12  10  286.17   34.00
   0 -12 -10  270.97   32.40
   0 -12 -10  367.76   34.10
   1  12  10  142.39   22.50
  -1 -12 -10  158.68   22.40
  -1 -12 -10  208.38   26.10
  -1 -12 -10   94.19   19.90
   2  12  10   81.99   19.40
  -2 -12 -10   89.99   17.00
  -2 -12 -10   74.19   16.70
  -2 -12 -10   57.39   16.30
   3  12  10  174.18   30.50
  -3 -12 -10  161.48   24.90
  -3 -12 -10  219.88   24.10
  -3 -12 -10  187.98   24.60
   4  12  10   93.39   18.00
  -4 -12 -10   48.70   13.40
  -4 -12 -10   70.69   14.00
  -4 -12 -10   84.79   16.50
   5  12  10  171.68   29.50
  -5 -12 -10  176.78   22.20
  -5 -12 -10  167.48   27.40
  -5 -12 -10  164.48   24.20
  -5 -12 -10  165.88   21.80
   6  12  10  954.60   59.49
  -6 -12 -10  840.12   50.99
  -6 -12 -10  822.52   55.09
  -6 -12 -10  867.91   58.99
   7  12  10  720.83   51.79
   7  12  10  568.84   51.19
   7  12  10  734.33   41.70
  -7 -12 -10  664.03   50.29
  -7 -12 -10  715.73   43.80
  -7 -12 -10  651.73   46.60
  -7 -12 -10  681.43   43.60
   8  12  10   23.30    8.30
   8  12  10   38.80   18.30
   8  12  10    7.90   16.70
  -8 -12 -10   11.40   14.70
  -8 -12 -10   15.80   10.90
  -8 -12 -10   42.80   12.50
  -8 -12 -10   21.20   13.70
   9  12  10  126.99   24.20
   9  12  10  103.39   21.10
   9  12  10  135.19   18.10
  -9 -12 -10  101.59   17.80
  -9 -12 -10  112.99   18.60
  -9 -12 -10  141.29   24.50
  10  12  10   44.00   12.60
  10  12  10   11.50   18.10
  10  12  10   36.10   20.90
 -10 -12 -10   32.10   12.70
 -10 -12 -10   15.30   13.60
 -10 -12 -10   19.60   18.50
   3 -13 -11  -26.30   18.20
   3 -13 -11   -9.60   18.70
  -2  13  11   -2.20   17.20
   2 -13 -11   24.20   18.30
   2 -13 -11   -4.50   16.90
  -1  13  11   10.10   17.30
   1 -13 -11   54.99   19.40
   1 -13 -11  -19.90   16.40
   0  13  11   -9.70   15.50
   0 -13 -11    4.60   16.40
   0 -13 -11  -27.00   13.40
   1  13  11  222.78   33.80
  -1 -13 -11  259.17   31.30
   2  13  11  539.25   45.70
  -2 -13 -11  485.45   40.00
   3  13  11   76.49   19.40
  -3 -13 -11   46.00   15.20
  -3 -13 -11   76.99   16.40
   4  13  11   16.80   16.30
  -4 -13 -11   25.60   12.70
  -4 -13 -11   28.80   14.70
   5  13  11  100.89   20.30
  -5 -13 -11  160.48   27.70
  -5 -13 -11  111.39   17.10
  -5 -13 -11  112.09   19.10
   6  13  11   75.99   19.90
  -6 -13 -11   79.49   18.10
  -6 -13 -11  116.09   18.30
  -6 -13 -11  109.99   22.60
   7  13  11  518.45   46.60
  -7 -13 -11  520.35   44.80
  -7 -13 -11  492.75   36.80
  -7 -13 -11  520.65   41.50
   8  13  11  644.84   52.99
   8  13  11  526.65   51.79
   8  13  11  631.34   39.50
  -8 -13 -11  640.24   42.60
  -8 -13 -11  624.64   45.70
  -8 -13 -11  576.24   49.99
   9  13  11  -26.90   17.80
   9  13  11   22.50   10.80
   9  13  11   19.10   20.50
  -9 -13 -11   17.40   12.70
  -9 -13 -11   23.30   13.80
  -9 -13 -11   20.10   18.50
  10  13  11   -3.30   14.30
  10  13  11  -35.90   20.10
  10  13  11  -27.60   19.20
 -10 -13 -11  -19.50   17.50
 -10 -13 -11   -1.40   11.30
 -10 -13 -11   -9.00   13.40
  -1  14  12   51.79   21.60
   1 -14 -12  142.09   24.90
   1 -14 -12   21.50   19.90
   0  14  12  139.99   25.90
   0 -14 -12  247.08   33.40
   1  14  12   61.29   21.10
  -1 -14 -12   72.49   20.10
   2  14  12   79.39   21.70
  -2 -14 -12   38.40   18.10
  -2 -14 -12  101.79   21.10
   3  14  12  451.85   44.20
  -3 -14 -12  466.55   38.00
   4  14  12   33.70   19.20
  -4 -14 -12   29.40   14.10
  -4 -14 -12   28.10   13.80
  -4 -14 -12    9.40   14.50
   5  14  12   -8.80   17.10
  -5 -14 -12    7.00   13.40
  -5 -14 -12   -3.40   11.60
  -5 -14 -12   -7.60   12.30
   6  14  12   57.99   21.20
  -6 -14 -12  106.79   24.10
  -6 -14 -12   75.99   18.90
  -6 -14 -12   72.59   16.50
   7  14  12   43.50   20.30
  -7 -14 -12   41.70   14.20
  -7 -14 -12   44.90   18.30
  -7 -14 -12   19.40   14.80
   8  14  12   -0.70   19.60
  -8 -14 -12   -8.40   12.40
  -8 -14 -12  -15.60   15.70
  -8 -14 -12   -2.90   12.80
   9  14  12   74.89   13.50
   9  14  12   65.09   24.30
   9  14  12   18.20   22.70
  -9 -14 -12   75.09   22.10
  -9 -14 -12   65.79   17.60
  -9 -14 -12   61.39   17.10
  10  14  12    1.70   33.00
  10  14  12   42.00   24.50
 -10 -14 -12   45.90   21.90
 -10 -14 -12   51.19   22.10
   1  15  13   13.00   19.50
  -1 -15 -13   57.99   22.10
  -1 -15 -13  -17.40   17.00
   2  15  13  -27.90   16.60
  -2 -15 -13  -12.10   15.30
   3  15  13   62.09   22.40
  -3 -15 -13   59.19   18.90
   4  15  13    4.40   20.10
  -4 -15 -13  -14.40   14.10
  -4 -15 -13   29.50   14.90
  -4 -15 -13   -2.30   13.80
   5  15  13  -22.40   18.60
  -5 -15 -13    1.80   14.30
  -5 -15 -13   15.30   15.70
  -5 -15 -13  -13.90   14.60
   6  15  13    7.20   20.60
  -6 -15 -13   21.70   18.60
  -6 -15 -13  -10.00   14.00
  -6 -15 -13   17.40   14.20
   7  15  13  260.37   42.10
  -7 -15 -13  251.57   28.70
  -7 -15 -13  248.78   37.90
  -7 -15 -13  163.08   26.40
   8  15  13  379.96   48.20
  -8 -15 -13  356.66   43.50
  -8 -15 -13  328.17   37.30
  -8 -15 -13  378.16   34.20
   9  15  13   -8.70   22.20
  -6 -14 -17   -5.10   12.70
   6  14  17  -12.90   15.90
   6  14  17  -31.80   20.50
  -5 -14 -17  -20.90   11.90
   5  14  17  -15.70   16.30
  -4 -14 -17  -17.80   11.90
  -4 -14 -17   -9.60   14.50
   4  14  17  -12.10   16.60
  -3 -14 -17  -13.20   14.50
  -3 -14 -17   -8.20   14.60
   3  14  17   -5.10   17.20
  -2 -14 -17   33.30   18.00
  -2 -14 -17   46.70   18.30
   2  14  17   26.50   19.80
  -8 -13 -16   23.60   15.50
  -8 -13 -16   12.20   13.50
   8  13  16  -24.30   18.00
   8  13  16   22.40   17.60
  -7 -13 -16   29.70   13.70
   7  13  16    7.90   15.40
   7  13  16    8.10   18.70
  -6 -13 -16   96.99   19.00
   6  13  16   89.09   23.40
   6  13  16  113.69   21.20
  -5 -13 -16   22.90   20.00
  -5 -13 -16   13.40   13.00
   5  13  16    7.80   15.20
   5  13  16   -2.00   20.00
  -4 -13 -16  290.07   33.90
  -4 -13 -16  342.87   32.20
   4  13  16  318.57   37.50
  -3 -13 -16  884.31   56.69
  -3 -13 -16  818.02   59.49
   3  13  16  918.41   62.09
  -2 -13 -16  126.39   22.20
  -2 -13 -16  119.99   20.80
   2  13  16  115.79   22.00
  -1 -13 -16   16.10   15.10
  -1 -13 -16   -4.20   14.10
   1  13  16  -12.40   15.40
   0 -13 -16   25.10   16.30
   0 -13 -16   44.50   18.20
   0  13  16   17.90   18.00
   1 -13 -16   -2.40   17.50
   1 -13 -16   -5.90   15.30
  -1  13  16   37.30   17.90
  -9 -12 -15   35.20   14.40
   9  12  15   16.20   16.50
  -8 -12 -15  374.86   37.10
  -8 -12 -15  346.37   35.70
   8  12  15  320.57   36.10
   8  12  15  323.17   37.40
  -7 -12 -15  297.67   32.10
   7  12  15  274.67   33.10
   7  12  15  249.28   34.20
  -6 -12 -15    5.00   10.40
   6  12  15    1.20   15.30
   6  12  15   -3.80   13.00
  -5 -12 -15  248.38   29.30
  -5 -12 -15  257.77   25.50
   5  12  15  237.88   31.30
  -4 -12 -15   47.90   13.90
  -4 -12 -15   62.89   14.00
   4  12  15   12.30   19.10
   4  12  15   67.79   16.60
  -3 -12 -15    1.20   12.00
  -3 -12 -15    6.10   11.50
   3  12  15    5.00   13.90
  -2 -12 -15  218.58   27.30
  -2 -12 -15  183.48   27.70
   2  12  15  193.08   30.20
  -1 -12 -15   16.60   13.00
  -1 -12 -15   31.70   14.50
   1  12  15   26.50   15.50
   0 -12 -15  -16.40   11.30
   0 -12 -15   -3.90   13.60
   0  12  15   -9.80   14.20
   1 -12 -15  -29.00   12.40
   1 -12 -15  -18.60   14.70
  -1  12  15   -7.70   15.30
   2 -12 -15   -6.30   17.30
   2 -12 -15  -13.90   14.50
  -2  12  15    1.70   16.20
   3 -12 -15  -28.80   16.60
   3 -12 -15   20.20   20.00
  -3  12  15   20.20   17.30
 -10 -11 -14  693.03   46.20
 -10 -11 -14  647.94   51.79
  10  11  14  744.53   68.49
  10  11  14  568.64   47.70
  -9 -11 -14  745.53   54.89
  -9 -11 -14  765.62   47.70
   9  11  14  809.72   72.29
   9  11  14  672.93   51.39
  -8 -11 -14  139.99   24.70
  -8 -11 -14   90.49   17.60
   8  11  14   90.59   17.50
   8  11  14   99.39   18.50
  -7 -11 -14   57.99   14.60
   7  11  14   31.30   13.80
   7  11  14   29.50   14.70
  -6 -11 -14  262.37   28.30
   6  11  14  238.28   28.60
   6  11  14  220.78   30.30
  -5 -11 -14   -8.00    8.30
  -5 -11 -14   -5.00    8.40
   5  11  14   -3.70   10.50
   5  11  14   -1.20   13.30
  -4 -11 -14   45.70   13.00
  -4 -11 -14   61.19   14.30
   4  11  14   37.00   14.00
   4  11  14   40.60   16.30
  -3 -11 -14   52.19   13.60
  -3 -11 -14   53.09   14.30
   3  11  14   45.60   18.90
   3  11  14   31.00   14.10
  -2 -11 -14   72.29   16.00
  -2 -11 -14   55.69   13.70
   2  11  14   65.99   15.70
  -1 -11 -14   21.80   13.20
  -1 -11 -14   32.50   13.90
   1  11  14   29.30   13.70
   0 -11 -14   23.40   13.20
   0 -11 -14   15.60   13.70
   0  11  14   21.80   14.40
   1 -11 -14   -7.10   12.60
   1 -11 -14  -12.20   11.50
  -1  11  14   -4.90   13.10
   2 -11 -14   62.89   16.60
   2 -11 -14   85.49   18.80
   3 -11 -14  368.86   39.60
   3 -11 -14  480.45   42.50
  -3  11  14  394.86   39.00
   4 -11 -14  196.38   29.30
   4 -11 -14  124.69   26.20
  -4  11  14  130.09   23.00
 -11 -10 -13  166.78   26.70
 -11 -10 -13   97.69   21.20
  11  10  13  105.09   31.00
  11  10  13  110.69   19.80
 -10 -10 -13   18.00   13.10
 -10 -10 -13   50.99   14.80
  10  10  13    7.20   11.90
  10  10  13   49.60   24.10
  -9 -10 -13   38.50   12.70
  -9 -10 -13   20.70   11.60
   9  10  13   11.20   11.70
   9  10  13   46.70   23.30
  -8 -10 -13   20.70   10.30
  -8 -10 -13   15.20   10.00
  -8 -10 -13   27.30   11.60
   8  10  13   26.90   19.30
   8  10  13    7.60   10.60
   8  10  13   22.20   12.20
  -7 -10 -13   12.60    9.40
   7  10  13    6.10   11.60
   7  10  13   21.30   16.60
   7  10  13    6.50   10.30
  -6 -10 -13   82.99   15.80
  -6 -10 -13  112.99   16.20
   6  10  13   97.59   22.40
   6  10  13   89.69   15.60
   6  10  13   84.49   16.30
  -5 -10 -13   83.99   12.80
  -5 -10 -13   69.49   13.70
   5  10  13   87.89   21.10
   5  10  13   66.89   14.20
   5  10  13   65.89   15.50
  -4 -10 -13    5.60    8.30
  -4 -10 -13    4.70    8.50
   4  10  13    7.40   12.20
   4  10  13   -6.90    9.80
  -3 -10 -13  285.87   28.20
  -3 -10 -13  296.97   26.50
   3  10  13  307.67   34.00
   3  10  13  307.67   30.50
  -2 -10 -13 1325.57   76.29
  -2 -10 -13 1413.16   73.59
   2  10  13 1240.08   78.49
   2  10  13 1383.36   76.89
  -1 -10 -13  779.32   47.30
  -1 -10 -13  712.73   47.90
   1  10  13  709.33   48.90
   0 -10 -13   -9.70    9.60
   0 -10 -13  -11.10   10.80
   0  10  13   -4.70   11.40
   1 -10 -13  551.04   41.10
   1 -10 -13  599.84   41.70
  -1  10  13  550.94   42.90
   2 -10 -13  712.63   47.10
   2 -10 -13  606.14   45.60
  -2  10  13  621.14   46.50
   3 -10 -13  339.27   35.20
   3 -10 -13  226.98   31.90
  -3  10  13  306.97   32.90
   4 -10 -13  -15.30   15.40
   4 -10 -13  -16.00   16.00
  -4  10  13    0.10   13.40
   5 -10 -13  -31.20   17.20
  -5  10  13  -13.30   13.90
   6 -10 -13   42.50   22.20
   6 -10 -13   -5.30   19.40
  12   9  12   65.89   31.80
 -11  -9 -12   27.90   15.90
 -11  -9 -12    9.60   11.80
 -11  -9 -12    6.00   10.90
  11   9  12   35.70   24.70
  11   9  12  -12.90    9.80
  11   9  12   -1.70   15.90
 -10  -9 -12   34.80   12.20
 -10  -9 -12   29.00   13.40
 -10  -9 -12   47.10   15.40
  10   9  12   19.40   12.10
  10   9  12   44.40   23.70
  10   9  12   24.50   16.90
  -9  -9 -12   33.80   12.50
  -9  -9 -12   35.10   10.80
  -9  -9 -12   34.00   12.20
   9   9  12   41.20   16.40
   9   9  12   35.50   20.70
   9   9  12   21.20   11.40
  -8  -9 -12   10.80   10.10
  -8  -9 -12   15.80   10.30
  -8  -9 -12   18.20   10.80
  -8  -9 -12    8.50    8.40
   8   9  12   11.70   14.50
   8   9  12    3.10    9.40
   8   9  12   14.80   18.20
   8   9  12    6.60    9.80
  -7  -9 -12  204.28   24.30
   7   9  12  199.98   23.50
   7   9  12  197.68   23.50
   7   9  12  214.18   34.90
  -6  -9 -12  901.51   49.60
  -6  -9 -12  909.01   57.19
   6   9  12  863.21   53.49
   6   9  12  934.21   54.89
   6   9  12  919.51   64.19
  -5  -9 -12   26.60    8.70
  -5  -9 -12   12.70    8.70
   5   9  12   11.00   12.50
   5   9  12   20.70   10.00
   5   9  12   19.50   12.00
  -4  -9 -12  191.78   21.90
  -4  -9 -12  206.58   19.20
   4   9  12  169.88   25.10
   4   9  12  178.38   25.00
   4   9  12  189.98   23.40
  -3  -9 -12  980.30   53.79
  -3  -9 -12  995.90   58.69
   3   9  12  974.20   60.69
   3   9  12  964.30   59.29
   3   9  12  956.10   57.59
  -2  -9 -12  187.28   20.30
  -2  -9 -12  182.98   21.20
   2   9  12  168.58   21.90
   2   9  12  170.48   23.10
   2   9  12  134.69   21.00
  -1  -9 -12  146.89   19.30
  -1  -9 -12  100.89   15.50
   1   9  12   98.79   16.00
   0  -9 -12  515.75   36.70
   0  -9 -12  538.75   36.50
   0   9  12  483.15   37.50
   1  -9 -12   39.30   13.60
   1  -9 -12   43.10   12.90
  -1   9  12   30.40   12.80
   2  -9 -12   59.19   15.90
   2  -9 -12   27.70   13.40
  -2   9  12   44.40   13.80
   3  -9 -12   53.99   15.80
   3  -9 -12   78.99   17.70
  -3   9  12   64.39   15.80
   4  -9 -12   -6.60   14.60
   4  -9 -12  -12.00   13.70
  -4   9  12   -2.00   11.70
   5  -9 -12  -11.10   15.40
   5  -9 -12  -15.40   15.40
  -5   9  12   -3.70   12.80
   6  -9 -12   90.19   22.40
   6  -9 -12   18.00   18.30
   7  -9 -12   36.40   23.40
   7  -9 -12  -10.50   19.50
 -12  -8 -11   24.30   13.20
 -12  -8 -11   22.20   18.60
  12   8  11   14.00   14.80
  12   8  11   43.70   21.60
  12   8  11   24.90   27.60
 -11  -8 -11   94.09   20.40
 -11  -8 -11   64.89   15.40
  11   8  11   46.00   14.50
  11   8  11   96.19   32.00
  11   8  11   77.49   22.80
 -10  -8 -11   36.40   13.00
 -10  -8 -11   60.19   16.30
  10   8  11   24.70   12.10
  10   8  11   62.19   25.20
  10   8  11   51.79   20.00
  -9  -8 -11  104.59   19.20
  -9  -8 -11  138.09   21.90
   9   8  11   81.69   15.40
   9   8  11  123.89   31.50
   9   8  11  115.69   22.80
  -8  -8 -11  167.58   23.40
  -8  -8 -11  129.29   23.80
  -8  -8 -11  148.59   20.80
   8   8  11  158.98   20.90
   8   8  11  168.28   32.90
   8   8  11  143.09   22.70
  -7  -8 -11   59.59   13.90
   7   8  11   55.09   11.50
   7   8  11   63.69   15.30
   7   8  11   31.80   10.60
   7   8  11   56.99   20.00
  -6  -8 -11  633.94   36.00
  -6  -8 -11  639.54   43.30
   6   8  11  669.63   50.99
   6   8  11  628.04   40.20
   6   8  11  632.04   42.10
   6   8  11  559.44   39.40
  -5  -8 -11 2499.15  130.49
  -5  -8 -11 2627.14  123.09
   5   8  11 2717.43  137.09
   5   8  11 2193.88  127.19
   5   8  11 2498.75  126.49
   5   8  11 2516.65  126.99
  -4  -8 -11  921.11   57.39
  -4  -8 -11  980.40   51.89
   4   8  11  959.70   55.39
   4   8  11  995.40   56.59
   4   8  11  975.10   61.59
  -3  -8 -11  182.88   19.70
  -3  -8 -11  192.48   17.70
   3   8  11  168.48   21.70
   3   8  11  177.28   22.00
   3   8  11  211.98   21.40
  -2  -8 -11    4.00    6.20
  -2  -8 -11    2.00    6.90
   2   8  11    7.90    8.20
   2   8  11    0.50   10.80
   2   8  11    3.30    7.70
  -1  -8 -11    7.30    6.40
  -1  -8 -11   -7.90    7.10
   1   8  11   -3.80    7.80
   1   8  11    8.50   12.50
   1   8  11    2.30    7.00
   0  -8 -11    0.90    7.30
   0  -8 -11   -4.10    8.60
   0   8  11   -4.40    7.90
   0   8  11    2.30    6.50
   1  -8 -11  225.78   24.10
   1  -8 -11  258.17   23.90
  -1   8  11  239.68   25.10
  -1   8  11  224.38   22.40
   2  -8 -11  677.93   44.20
   2  -8 -11  661.93   44.30
   2  -8 -11  703.23   45.00
  -2   8  11  698.73   45.70
   3  -8 -11  527.05   38.40
   3  -8 -11  478.45   37.30
   3  -8 -11  501.15   38.30
  -3   8  11  480.75   37.80
   4  -8 -11   99.49   18.80
   4  -8 -11   84.99   18.40
   4  -8 -11   83.39   17.70
  -4   8  11   89.79   16.70
   5  -8 -11  105.89   21.90
   5  -8 -11  134.59   22.10
   5  -8 -11  177.08   24.70
  -5   8  11  159.98   24.60
   6  -8 -11   -6.00   17.00
   6  -8 -11  -14.90   16.20
   6  -8 -11  -15.10   15.30
  -6   8  11  -11.60   15.30
   7  -8 -11  136.29   23.70
   7  -8 -11  167.68   29.10
   8  -8 -11  197.78   31.60
   8  -8 -11  170.98   32.00
 -12  -7 -10   77.19   16.50
 -12  -7 -10   73.69   24.00
  12   7  10  119.49   37.60
  12   7  10   60.29   18.90
  12   7  10   81.39   24.50
 -11  -7 -10  107.99   22.60
  11   7  10  125.99   35.90
  11   7  10   78.89   22.20
  11   7  10   56.99   15.00
 -10  -7 -10  681.63   48.30
  10   7  10  701.53   55.39
  10   7  10  685.03   66.89
  10   7  10  643.84   43.90
  -9  -7 -10 1172.48   68.79
   9   7  10 1209.28   67.69
   9   7  10 1222.98   90.29
   9   7  10 1212.88   71.19
   9   7  10 1224.28   77.19
  -8  -7 -10  427.56   33.60
   8   7  10  445.56   39.90
   8   7  10  451.45   49.50
   8   7  10  498.95   33.00
   8   7  10  462.85   32.90
  -7  -7 -10    5.30    7.50
  -7  -7 -10   11.00    7.00
   7   7  10   10.40   14.10
   7   7  10    3.50    7.80
   7   7  10   15.80   11.60
   7   7  10    6.00    7.60
   7   7  10   -2.20    7.10
  -6  -7 -10   24.10    8.00
  -6  -7 -10   32.80   10.00
   6   7  10   38.20   15.80
   6   7  10   38.90    6.90
   6   7  10   25.00    8.90
   6   7  10   31.20   11.40
   6   7  10   33.50    9.20
  -5  -7 -10    6.50    5.80
  -5  -7 -10    0.60    5.30
   5   7  10    2.40    6.80
   5   7  10   -5.10    8.10
   5   7  10    7.30   10.80
   5   7  10   -0.60    6.60
  -4  -7 -10  102.49   11.90
  -4  -7 -10  101.69   14.40
   4   7  10  105.49   15.40
   4   7  10  123.49   19.80
   4   7  10   97.29   15.70
   4   7  10   79.79   13.10
  -3  -7 -10  375.86   27.60
  -3  -7 -10  349.96   23.30
   3   7  10  339.17   29.70
   3   7  10  380.16   27.00
   3   7  10  381.46   27.40
  -2  -7 -10  421.66   26.70
  -2  -7 -10  432.56   30.00
   2   7  10  422.26   29.80
   2   7  10  444.16   31.60
   2   7  10  451.95   30.60
  -1  -7 -10   19.70    6.80
  -1  -7 -10   12.60    7.10
   1   7  10   17.00    7.80
   1   7  10   12.60    7.00
   1   7  10   15.60    9.30
   0  -7 -10   69.49   11.50
   0  -7 -10   63.19   10.80
   0   7  10   55.59   10.50
   0   7  10   54.19   10.80
   1  -7 -10   -2.20    8.20
   1  -7 -10    3.50    6.70
  -1   7  10    4.90    7.70
  -1   7  10   -2.90    5.80
   2  -7 -10  723.13   44.10
   2  -7 -10  728.23   43.90
   2  -7 -10  764.32   43.80
  -2   7  10  705.33   44.80
  -2   7  10  630.04   42.80
   3  -7 -10 1805.82   93.39
   3  -7 -10 1763.82   94.69
   3  -7 -10 1817.32   94.59
  -3   7  10 1745.23   94.29
   4  -7 -10  620.44   41.80
   4  -7 -10  615.94   42.70
   4  -7 -10  594.44   42.70
  -4   7  10  599.44   41.40
  -4   7  10  539.45   40.70
   5  -7 -10   83.79   18.00
   5  -7 -10   84.59   16.80
   5  -7 -10   89.49   19.00
  -5   7  10   78.39   23.80
  -5   7  10   94.59   16.40
   6  -7 -10  593.24   47.30
   6  -7 -10  595.74   45.70
   6  -7 -10  499.75   42.80
  -6   7  10  517.25   40.50
   7  -7 -10  165.38   26.10
   7  -7 -10  282.17   36.20
   7  -7 -10  263.37   36.70
   8  -7 -10   39.40   21.80
   8  -7 -10   46.30   21.60
   8  -7 -10   24.10   23.90
   9  -7 -10   31.30   24.00
 -12  -6  -9  168.68   30.90
  12   6   9  238.48   49.10
  12   6   9  143.59   29.80
  12   6   9  223.48   31.70
  12   6   9  199.38   28.10
 -11  -6  -9  423.16   41.20
  11   6   9  395.36   38.00
  11   6   9  324.57   30.00
  11   6   9  382.96   58.19
  11   6   9  368.26   43.70
 -10  -6  -9  289.57   33.10
  10   6   9  289.57   48.70
  10   6   9  306.47   31.50
  10   6   9  239.78   36.70
  10   6   9  258.37   25.50
  -9  -6  -9    4.50   13.40
   9   6   9   -5.60    8.30
   9   6   9   18.60   20.00
   9   6   9   -6.20   15.30
   9   6   9    8.20   10.30
  -8  -6  -9  110.69   17.20
   8   6   9  103.29   14.50
   8   6   9  101.39   15.80
   8   6   9  116.09   28.30
   8   6   9   93.39   20.50
  -7  -6  -9   31.40    8.60
  -7  -6  -9   33.40    8.60
   7   6   9   36.90   13.30
   7   6   9   33.30    9.50
   7   6   9   28.70    8.80
   7   6   9   41.20   17.90
   7   6   9   27.70    8.30
  -6  -6  -9  191.88   15.80
   6   6   9  214.68   18.90
   6   6   9  209.68   23.20
   6   6   9  199.38   18.40
   6   6   9  212.58   14.80
   6   6   9  188.68   18.40
   6   6   9  235.38   29.40
  -5  -6  -9  790.52   50.19
  -5  -6  -9  858.81   43.70
   5   6   9  875.11   56.79
   5   6   9  800.32   46.10
   5   6   9  846.72   46.80
   5   6   9  833.82   49.60
   5   6   9  859.61   43.10
  -4  -6  -9  999.20   49.90
  -4  -6  -9  928.71   55.69
   4   6   9 1007.30   53.09
   4   6   9  967.20   52.69
   4   6   9 1007.80   60.59
   4   6   9  941.01   53.69
  -3  -6  -9   93.39   10.30
  -3  -6  -9  108.49   12.90
   3   6   9   86.19   12.90
   3   6   9   71.59   13.20
   3   6   9   92.89   13.50
  -2  -6  -9 1021.10   55.59
  -2  -6  -9  929.41   50.89
   2   6   9 1044.50   57.19
   2   6   9 1009.00   53.89
   2   6   9  960.50   53.99
  -1  -6  -9 2012.20   99.99
  -1  -6  -9 1909.51   96.49
   1   6   9 1979.10   98.99
   1   6   9 1954.00   99.19
   1   6   9 1926.51  100.39
   0  -6  -9   -1.80    6.10
   0  -6  -9    6.10    5.00
   0   6   9   -0.80    5.50
   0   6   9    8.40    6.40
   0   6   9    2.10    8.50
   1  -6  -9 1158.28   62.19
   1  -6  -9 1208.78   63.09
  -1   6   9 1169.38   63.79
   2  -6  -9  289.47   24.50
   2  -6  -9  313.87   24.40
   2  -6  -9  329.27   23.90
  -2   6   9  300.67   23.80
  -2   6   9  300.67   25.00
   3  -6  -9   -4.00    9.30
   3  -6  -9    9.20    8.40
   3  -6  -9    1.60    9.70
  -3   6   9    3.80    8.30
  -3   6   9   -3.30    8.80
   4  -6  -9  209.68   25.40
   4  -6  -9  231.08   24.50
   4  -6  -9  221.68   25.60
  -4   6   9  228.78   25.00
  -4   6   9  231.58   24.40
   5  -6  -9   27.40   14.10
   5  -6  -9   24.20   14.00
   5  -6  -9   12.00   13.20
  -5   6   9    5.80   11.30
  -5   6   9   27.40   13.80
   6  -6  -9   -5.10   14.40
   6  -6  -9    0.20   14.60
   6  -6  -9   -1.40   14.70
  -6   6   9   -8.70   13.20
  -6   6   9   -2.00   11.20
   7  -6  -9   32.80   17.60
   7  -6  -9    5.80   16.10
   7  -6  -9   42.20   17.40
  -7   6   9    1.90   16.30
   8  -6  -9  163.08   26.40
   8  -6  -9  104.69   25.00
   8  -6  -9  139.89   26.40
   9  -6  -9   34.10   22.40
   9  -6  -9   39.30   22.40
 -12  -5  -8  113.79   27.80
  12   5   8   84.99   20.80
  12   5   8   83.59   34.90
  12   5   8   88.89   25.80
 -11  -5  -8  133.69   26.30
  11   5   8  122.99   22.00
  11   5   8  143.59   29.50
  11   5   8  131.69   20.40
  11   5   8  138.19   38.40
 -10  -5  -8  644.84   48.50
  10   5   8  622.14   48.60
  10   5   8  625.54   40.80
  10   5   8  616.24   53.29
  10   5   8  644.24   65.99
  -9  -5  -8  837.12   53.39
   9   5   8  812.22   58.89
   9   5   8  713.63   53.89
   9   5   8  838.72   48.50
   9   5   8  857.31   71.09
  -8  -5  -8  502.85   37.40
   8   5   8  538.55   34.30
   8   5   8  480.55   50.99
   8   5   8  508.15   42.50
   8   5   8  550.44   39.00
  -7  -5  -8  420.66   30.90
  -7  -5  -8  421.66   27.80
   7   5   8  402.96   27.00
   7   5   8  433.96   28.80
   7   5   8  452.55   44.20
   7   5   8  461.85   36.10
   7   5   8  445.66   31.80
   6   5   8  698.03   39.90
   6   5   8  706.23   46.30
   6   5   8  701.13   42.20
   6   5   8  757.02   41.60
   6   5   8  746.63   53.59
  -5  -5  -8  555.94   29.80
   5   5   8  566.44   32.10
   5   5   8  519.85   36.10
   5   5   8  578.94   33.10
   5   5   8  526.25   41.80
  -4  -5  -8  402.86   22.00
  -4  -5  -8  379.16   27.30
   4   5   8  359.36   24.50
   4   5   8  428.86   32.90
   4   5   8  364.86   24.20
   4   5   8  398.66   21.40
   4   5   8  380.26   26.40
  -3  -5  -8  123.49   10.40
  -3  -5  -8  123.59   13.80
   3   5   8  132.29   17.00
   3   5   8  126.59   13.30
   3   5   8  111.99   12.10
   3   5   8  130.49   13.20
  -2  -5  -8   63.89    8.60
  -2  -5  -8   64.69   10.00
   2   5   8   86.29   12.80
   2   5   8   76.79   11.20
   2   5   8   66.19   11.00
  -1  -5  -8 1774.42   90.19
  -1  -5  -8 1901.91   93.79
   1   5   8 1815.72   91.89
   1   5   8 1906.61   94.69
   1   5   8 1813.52   92.59
   0  -5  -8 2397.86  120.79
   0  -5  -8 2511.15  122.89
   0   5   8 2522.15  122.59
   0   5   8 2509.65  124.19
   0   5   8 2480.85  122.99
   1  -5  -8  978.10   50.79
   1  -5  -8  961.10   50.29
  -1   5   8  809.82   50.89
  -1   5   8 1010.80   52.19
   2  -5  -8  149.88   15.90
   2  -5  -8  131.39   14.30
   2  -5  -8  119.49   14.90
  -2   5   8  115.89   14.70
  -2   5   8  140.09   16.10
   3  -5  -8  806.82   45.30
   3  -5  -8  853.11   47.00
   3  -5  -8  767.82   46.80
  -3   5   8  764.62   46.30
  -3   5   8  831.82   47.10
   4  -5  -8  513.45   34.00
   4  -5  -8  527.75   35.50
   4  -5  -8  506.55   36.20
  -4   5   8  494.95   35.00
  -4   5   8  526.85   34.90
   5  -5  -8  346.97   30.60
   5  -5  -8  351.46   32.00
   5  -5  -8  409.46   31.30
   5  -5  -8  321.77   30.10
  -5   5   8  376.06   29.10
  -5   5   8  352.56   31.90
   6  -5  -8  798.02   55.89
   6  -5  -8  847.42   53.39
   6  -5  -8  823.32   54.09
  -6   5   8  818.92   50.39
  -6   5   8  818.82   53.89
   7  -5  -8  483.35   41.10
   7  -5  -8  440.66   39.00
   7  -5  -8  472.35   43.70
  -7   5   8  421.46   41.40
   8  -5  -8   74.99   22.50
   8  -5  -8   64.29   20.30
   8  -5  -8   47.50   18.90
  -8   5   8   15.70   21.70
   9  -5  -8   65.89   23.70
   9  -5  -8   54.99   21.80
  -9   5   8   18.00   24.30
  10  -5  -8   37.70   23.80
  10  -5  -8   20.10   20.70
 -10   5   8  -33.40   25.20
 -12  -4  -7  105.29   29.60
  12   4   7   94.19   23.10
  12   4   7   90.29   30.10
  12   4   7   97.19   22.10
  12   4   7  150.68   45.00
 -11  -4  -7  144.29   28.30
  11   4   7  128.69   24.50
  11   4   7  170.78   43.70
  11   4   7  142.49   19.80
  11   4   7  120.09   29.10
 -10  -4  -7  252.27   34.10
  10   4   7  166.48   36.70
  10   4   7  214.48   31.80
  10   4   7  183.08   29.70
  -9  -4  -7  141.19   22.70
   9   4   7  168.38   27.30
   9   4   7  180.08   36.50
   9   4   7  124.39   21.40
   9   4   7  187.28   19.60
  -8  -4  -7  639.84   43.40
   8   4   7  680.23   40.00
   8   4   7  592.84   56.49
   8   4   7  623.24   44.80
   8   4   7  664.63   48.60
  -7  -4  -7  378.86   28.50
   7   4   7  325.47   38.80
   7   4   7  354.36   29.40
   7   4   7  336.37   31.80
   7   4   7  401.46   26.40
   6   4   7  817.82   49.40
   6   4   7  870.71   59.59
   6   4   7  871.01   52.99
   6   4   7  864.71   47.20
   5   4   7 1981.70  103.69
   5   4   7 1877.11   96.19
   5   4   7 1829.82   92.79
   5   4   7 1831.22   91.49
   5   4   7 1684.63   89.89
   4   4   7 1821.42   94.79
   4   4   7 1910.61   92.09
   4   4   7 1919.31  101.19
   4   4   7 1775.82   90.99
  -3  -4  -7   27.60    4.60
   3   4   7   24.20    7.10
   3   4   7   26.80    6.00
   3   4   7   23.70    5.50
   3   4   7   32.10    9.80
  -2  -4  -7  508.55   27.70
  -2  -4  -7  556.54   32.40
   2   4   7  599.04   34.70
   2   4   7  485.45   29.10
   2   4   7  510.55   30.10
   2   4   7  522.15   29.80
  -1  -4  -7  214.08   15.10
  -1  -4  -7  249.68   17.90
   1   4   7  276.97   19.40
   1   4   7  225.58   17.50
   1   4   7  244.38   17.20
   0  -4  -7    2.60    3.60
   0  -4  -7    6.70    4.60
   0   4   7    4.80    4.80
   0   4   7    6.50    5.00
   0   4   7    5.20    4.80
   1  -4  -7  962.30   50.29
   1  -4  -7  941.01   49.80
  -1   4   7  974.00   51.29
  -1   4   7  923.01   51.39
  -1   4   7  980.10   51.49
   2  -4  -7 1802.22   95.39
   2  -4  -7 1947.51   95.39
   2  -4  -7 1952.10   95.99
  -2   4   7 1942.81   96.89
  -2   4   7 1972.20   96.89
   3  -4  -7  639.84   36.10
   3  -4  -7  647.74   37.90
   3  -4  -7  615.34   38.00
  -3   4   7  616.74   37.60
  -3   4   7  648.64   37.90
   4  -4  -7   43.20   10.40
   4  -4  -7   48.10    9.60
   4  -4  -7   60.29   10.60
  -4   4   7   42.50   10.10
   5  -4  -7  689.83   46.90
   5  -4  -7  703.23   45.20
   5  -4  -7  725.53   44.00
   5  -4  -7  790.62   45.90
  -5   4   7  749.03   43.60
  -5   4   7  697.63   40.10
  -5   4   7  737.13   46.70
   6  -4  -7   61.89   15.90
   6  -4  -7   87.59   17.90
   6  -4  -7   84.09   16.80
   6  -4  -7   77.89   16.00
  -6   4   7   67.69   12.90
  -6   4   7   86.39   19.20
  -6   4   7   63.19   11.70
   7  -4  -7  589.14   43.70
   7  -4  -7  593.14   48.00
   7  -4  -7  616.94   44.30
   7  -4  -7  519.35   43.40
  -7   4   7  596.24   46.90
  -7   4   7  511.35   39.30
  -7   4   7  551.34   36.60
   8  -4  -7  470.15   40.20
   8  -4  -7  400.86   38.40
   8  -4  -7  475.85   45.20
   8  -4  -7  451.25   38.20
  -8   4   7  364.66   42.60
   9  -4  -7   25.20   20.70
   9  -4  -7   28.00   17.90
  -9   4   7  -19.70   21.30
  10  -4  -7    1.40   19.00
  10  -4  -7    5.30   21.60
 -10   4   7  -26.80   23.30
  11  -4  -7   35.20   25.40
  11  -4  -7   16.60   21.50
 -11   4   7  -40.90   24.60
 -12  -3  -6  404.26   49.50
  12   3   6  282.57   55.09
  12   3   6  366.96   49.60
 -11  -3  -6   85.39   25.10
  11   3   6   62.39   23.60
  11   3   6   58.39   30.60
  11   3   6   63.59   19.90
 -10  -3  -6   23.80   20.20
  10   3   6   33.60   16.80
  10   3   6   51.19   28.50
  10   3   6   31.80    9.10
  10   3   6   34.70   19.40
  -9  -3  -6   80.29   20.30
   9   3   6   52.69   16.10
   9   3   6   53.09   17.80
   9   3   6   66.39   24.90
  -8  -3  -6  231.18   28.10
   8   3   6  266.47   39.40
   8   3   6  245.28   30.60
   8   3   6  245.28   21.30
   8   3   6  225.78   27.70
  -7  -3  -6  455.45   33.20
   7   3   6  478.45   45.20
   7   3   6  485.85   35.60
   7   3   6  470.55   37.70
   7   3   6  493.45   30.40
  -6  -3  -6  350.76   25.30
   6   3   6  316.67   35.10
   6   3   6  345.37   23.20
   6   3   6  343.67   29.00
   6   3   6  345.87   27.30
   5   3   6   49.99   11.70
   5   3   6   42.50    7.60
   5   3   6   40.90    9.20
   5   3   6   57.39   15.60
   4   3   6   29.70    6.30
   4   3   6   38.30   12.00
   4   3   6   21.00    8.80
   4   3   6   29.20    5.00
   4   3   6   26.20    7.00
   3   3   6  144.99   17.00
   3   3   6  123.49   13.40
   3   3   6  131.69   11.10
   3   3   6  126.19   10.70
   2   3   6   83.39   12.30
   2   3   6   80.19    8.60
   2   3   6   69.69    9.30
   2   3   6   77.59    8.90
  -1  -3  -6 4820.62  241.78
  -1  -3  -6 5166.18  245.68
   1   3   6 4980.30  243.18
   1   3   6 5559.94  247.18
   1   3   6 5169.48  244.28
   0  -3  -6 4727.53  241.48
   0  -3  -6 5095.59  243.78
   0   3   6 5698.03  245.68
   0   3   6 5086.29  243.68
   0   3   6 4982.00  242.28
   1  -3  -6 2736.13  132.29
   1  -3  -6 2625.94  131.69
  -1   3   6 2811.42  132.39
  -1   3   6 2814.72  133.59
  -1   3   6 2713.83  133.59
   2  -3  -6  429.36   24.50
   2  -3  -6  420.76   25.60
   2  -3  -6  399.06   25.20
  -2   3   6  423.76   26.30
  -2   3   6  434.86   26.30
   3  -3  -6  557.14   34.90
   3  -3  -6  633.94   33.10
   3  -3  -6  583.34   34.60
   3  -3  -6  588.74   33.40
  -3   3   6  599.54   34.90
  -3   3   6  564.64   30.70
  -3   3   6  604.24   35.10
   4  -3  -6  154.38   15.70
   4  -3  -6  159.88   18.50
   4  -3  -6  130.89   16.30
   4  -3  -6  170.88   17.50
  -4   3   6  152.98   13.20
  -4   3   6  164.38   16.70
  -4   3   6  167.88   18.70
   5  -3  -6  335.17   24.70
   5  -3  -6  311.47   27.90
   5  -3  -6  283.47   25.40
   5  -3  -6  303.87   25.20
  -5   3   6  294.47   21.00
  -5   3   6  311.87   27.40
  -5   3   6  309.17   23.90
   6  -3  -6   90.59   15.50
   6  -3  -6   97.39   15.40
   6  -3  -6   88.09   16.20
   6  -3  -6  101.89   17.20
  -6   3   6  108.59   20.20
  -6   3   6   91.49   16.40
  -6   3   6  102.19   15.10
   7  -3  -6   16.00   13.80
   7  -3  -6    1.50   12.30
   7  -3  -6    7.70   14.40
   7  -3  -6    3.50   11.60
  -7   3   6   -9.30    9.90
  -7   3   6    9.40   18.10
  -7   3   6    5.00    9.00
   8  -3  -6   33.60   15.80
   8  -3  -6   51.49   19.30
   8  -3  -6   12.10   16.80
   8  -3  -6   53.29   17.10
  -8   3   6   31.50   21.30
  -8   3   6   17.40   12.50
   9  -3  -6   36.80   16.80
   9  -3  -6    1.20   16.90
   9  -3  -6   -0.20   14.70
  -9   3   6   17.40   11.60
  -9   3   6  -26.40   19.90
  10  -3  -6  -10.60   17.40
  10  -3  -6  -18.00   15.60
  10  -3  -6   14.70   16.00
 -10   3   6  -36.00   20.50
 -10   3   6    1.70   13.30
  11  -3  -6   37.50   23.70
  11  -3  -6   41.00   26.20
  11  -3  -6    0.80   18.50
 -12  -2  -5   48.70   27.40
  12   2   5   54.89   24.50
  12   2   5   63.69   28.20
  12   2   5   76.69   36.50
  11   2   5  223.98   23.20
  11   2   5  361.46   41.40
  11   2   5  270.47   51.29
 -10  -2  -5   65.29   23.40
  10   2   5   35.10    9.50
  10   2   5   49.90   18.50
  10   2   5   46.40   28.10
  10   2   5   46.00   20.70
  -9  -2  -5    3.20   18.20
   9   2   5   -3.80   19.40
   9   2   5   -5.20   13.20
   9   2   5   -0.80    7.00
   9   2   5  -10.20   13.80
  -8  -2  -5   33.40   15.70
   8   2   5   49.50   10.70
   8   2   5   51.59   23.70
   8   2   5   50.49   11.70
   8   2   5   54.29   17.20
   8   2   5   58.09   16.00
  -7  -2  -5   -8.50   10.40
   7   2   5   -1.50    5.90
   7   2   5    3.90   10.90
   7   2   5    5.90   14.00
   7   2   5    6.00    9.70
  -6  -2  -5 1076.69   59.09
   6   2   5 1090.59   71.49
   6   2   5 1113.99   57.69
   6   2   5 1079.19   64.09
   6   2   5 1114.99   62.19
   5   2   5 3962.20  186.28
   5   2   5 3838.92  189.18
   5   2   5 3790.72  191.28
   5   2   5 3908.51  197.88
   4   2   5 2919.91  129.19
   4   2   5 2675.43  130.69
   4   2   5 2375.56  136.99
   4   2   5 2644.84  132.69
   3   2   5  420.56   27.60
   3   2   5  441.46   25.60
   3   2   5  376.46   30.20
   3   2   5  448.66   23.40
   3   2   5  468.65   24.90
   2   2   5 1580.24   79.39
   2   2   5 1574.94   80.99
   2   2   5 1759.82   85.19
   2   2   5 1612.04   79.19
   1   2   5 2599.14  117.59
   1   2   5 2452.35  116.59
   1   2   5 2251.67  116.79
   1   2   5 2435.16  120.09
   0  -2  -5   44.90    6.50
   0  -2  -5   54.69    7.10
   0   2   5   43.70    6.80
   0   2   5   72.59    8.90
   0   2   5   60.39    7.50
   1  -2  -5 1910.21   93.89
   1  -2  -5 1828.02   93.39
  -1   2   5 1861.41   93.39
  -1   2   5 1925.51   94.99
  -1   2   5 2156.98   95.69
   2  -2  -5 1470.65   72.89
   2  -2  -5 1514.55   71.99
   2  -2  -5 1417.46   72.89
   2  -2  -5 1378.56   71.69
  -2   2   5 1579.64   74.19
  -2   2   5 1455.15   73.59
   3  -2  -5 1638.14   79.99
   3  -2  -5 1706.03   81.99
   3  -2  -5 1645.64   81.99
   3  -2  -5 1575.84   82.59
  -3   2   5 1636.04   82.29
  -3   2   5 1666.43   82.19
  -3   2   5 1584.04   79.19
   4  -2  -5 2526.25  129.09
   4  -2  -5 2643.34  127.79
   4  -2  -5 2633.74  125.49
   4  -2  -5 2592.54  128.59
  -4   2   5 2581.84  128.19
  -4   2   5 2544.65  124.59
  -4   2   5 2607.14  127.09
   5  -2  -5 1535.85   80.69
   5  -2  -5 1594.74   79.19
   5  -2  -5 1518.35   83.09
   5  -2  -5 1572.04   82.69
  -5   2   5 1580.14   79.79
  -5   2   5 1534.15   82.39
  -5   2   5 1547.55   77.59
   6  -2  -5  922.81   52.59
   6  -2  -5 1010.80   52.09
   6  -2  -5  857.71   55.39
   6  -2  -5  845.82   54.39
  -6   2   5  928.51   49.30
  -6   2   5  878.81   55.99
  -6   2   5  893.11   50.39
   7  -2  -5  531.35   42.10
   7  -2  -5  562.84   43.90
   7  -2  -5  607.34   40.10
   7  -2  -5  637.94   39.10
  -7   2   5  584.64   36.40
  -7   2   5  595.84   36.70
  -7   2   5  595.44   47.70
   8  -2  -5 1039.30   68.49
   8  -2  -5 1091.19   64.99
   8  -2  -5 1115.09   70.69
   8  -2  -5 1136.09   61.39
  -8   2   5 1056.19   72.19
  -8   2   5 1080.79   60.69
   9  -2  -5  148.99   25.10
   9  -2  -5  172.08   28.00
   9  -2  -5  145.39   22.40
  -9   2   5  148.59   29.90
  -9   2   5  185.48   22.90
  10  -2  -5  108.19   23.00
  10  -2  -5   97.49   20.40
  10  -2  -5   98.19   23.60
 -10   2   5   75.09   26.30
 -10   2   5  172.38   23.40
  11  -2  -5  489.25   49.50
  11  -2  -5  612.14   57.09
  11  -2  -5  457.65   44.00
 -11   2   5  478.05   38.70
 -11   2   5  349.07   52.29
  12  -2  -5  362.86   44.70
  12  -2  -5  225.58   38.80
  12  -2  -5  270.37   38.00
 -12   2   5  163.68   37.00
 -12   2   5  283.77   32.10
 -12  -1  -4    4.30   25.10
  12   1   4   48.10   32.80
  12   1   4    3.90   23.00
  12   1   4   17.80   25.10
 -11  -1  -4   15.60   24.70
  11   1   4    7.00   25.40
  11   1   4   32.20   24.50
  11   1   4   10.20    8.30
  11   1   4   -4.10   19.50
 -10  -1  -4  105.39   26.70
  10   1   4  117.29   37.00
  10   1   4  122.49   29.20
  10   1   4  102.69   16.70
  10   1   4  112.79   25.60
  -9  -1  -4  283.67   37.30
   9   1   4  267.17   35.60
   9   1   4  246.08   35.60
  -8  -1  -4  252.57   32.40
   8   1   4  288.47   31.70
   8   1   4  191.78   20.60
   8   1   4  234.98   31.20
   8   1   4  218.18   38.70
   8   1   4  237.68   20.10
  -7  -1  -4  633.04   43.80
   7   1   4  683.53   45.90
   7   1   4  723.83   57.19
   7   1   4  654.13   38.10
   7   1   4  672.43   39.10
   7   1   4  691.13   47.20
  -6  -1  -4 1074.39   57.59
   6   1   4 1070.39   60.79
   6   1   4 1072.99   55.39
   6   1   4  989.50   53.99
   6   1   4 1013.30   61.79
   6   1   4 1057.99   69.39
   4   1   4  797.72   46.30
   4   1   4  861.51   52.79
   4   1   4  854.91   44.00
   4   1   4  821.42   48.10
   3   1   4 3351.06  160.98
   3   1   4 3355.26  162.88
   3   1   4 3103.69  166.08
   3   1   4 3553.34  159.98
   2   1   4  270.67   17.00
   2   1   4  288.47   16.30
   2   1   4  276.97   19.00
   2   1   4  314.97   22.20
   1   1   4  314.07   18.10
   1   1   4  306.37   17.40
   1   1   4  238.08   18.90
   1   1   4  301.37   16.70
   0  -1  -4    1.90    2.70
   0   1   4   -0.40    3.90
   0   1   4   -0.90    2.90
   0   1   4    2.50    3.40
   0   1   4   -0.60    4.30
   1  -1  -4  618.94   32.70
   1  -1  -4  626.84   32.80
  -1   1   4  629.04   32.30
  -1   1   4  685.13   34.70
  -1   1   4  666.83   32.20
  -1   1   4  633.74   34.30
   2  -1  -4 4628.14  230.68
   2  -1  -4 4740.03  230.58
   2  -1  -4 5375.36  230.58
   2  -1  -4 4785.42  229.18
  -2   1   4 4973.60  231.48
  -2   1   4 5023.30  231.38
  -2   1   4 4557.34  228.78
   3  -1  -4  430.86   23.50
   3  -1  -4  377.36   20.40
   3  -1  -4  323.87   23.00
   3  -1  -4  343.37   22.40
  -3   1   4  367.06   22.90
  -3   1   4  353.66   23.30
  -3   1   4  364.26   20.50
   4  -1  -4  330.97   23.70
   4  -1  -4  330.07   22.30
   4  -1  -4  323.57   20.20
   4  -1  -4  307.87   23.70
  -4   1   4  330.47   20.00
  -4   1   4  333.77   22.00
  -4   1   4  334.27   24.40
   5  -1  -4  422.66   28.20
   5  -1  -4  436.06   27.00
   5  -1  -4  450.65   30.90
   5  -1  -4  423.16   30.80
  -5   1   4  424.06   32.00
  -5   1   4  411.76   26.90
  -5   1   4  425.46   25.70
   6  -1  -4 2484.85  127.09
   6  -1  -4 2774.32  124.69
   6  -1  -4 2358.46  129.99
   6  -1  -4 2614.94  130.79
  -6   1   4 2436.96  129.99
  -6   1   4 2499.85  125.19
  -6   1   4 2616.54  124.59
   7  -1  -4 1636.04   84.39
   7  -1  -4 1399.46   78.69
   7  -1  -4 1462.25   83.29
   7  -1  -4 1512.95   75.59
  -7   1   4 1428.96   84.19
  -7   1   4 1468.75   76.09
  -7   1   4 1437.96   76.29
   8  -1  -4   66.89   11.40
   8  -1  -4   56.29   13.40
   8  -1  -4   55.99   15.40
   8  -1  -4   49.70   16.00
  -8   1   4   66.79   21.10
  -8   1   4   80.89   13.80
   9  -1  -4  628.64   51.89
   9  -1  -4  721.13   54.49
   9  -1  -4  690.33   47.20
  -9   1   4  694.33   56.29
  -9   1   4  703.93   44.30
  10  -1  -4   87.29   22.10
  10  -1  -4   80.09   17.20
  10  -1  -4   92.29   22.70
 -10   1   4   93.69   17.30
 -10   1   4   47.00   23.80
  11  -1  -4   32.70   21.20
  11  -1  -4   27.10   20.80
  11  -1  -4   28.00   16.30
 -11   1   4   -2.10   15.30
 -11   1   4  -22.90   22.50
  12  -1  -4   78.69   28.80
  12  -1  -4   66.59   20.60
  12  -1  -4   60.79   23.70
 -12   1   4   47.20   30.10
 -12   1   4   74.09   18.80
 -12   0  -3  159.08   35.00
  12   0   3  409.56   51.29
  12   0   3  357.46   63.39
  12   0   3  254.77   40.90
 -11   0  -3  660.43   58.39
  11   0   3  754.72   62.69
  11   0   3  788.02   62.89
  11   0   3  558.74   41.70
  11   0   3  671.83   74.39
 -10   0  -3   98.49   26.10
  10   0   3   66.29   12.70
  10   0   3   83.39   32.10
  10   0   3   88.39   23.50
  10   0   3  105.49   26.20
  -9   0  -3  206.58   36.00
   9   0   3  255.07   35.30
   9   0   3  231.28   43.10
   9   0   3  182.08   29.60
   9   0   3  207.48   21.20
  -8   0  -3 1496.35   84.69
   8   0   3 1362.36   76.49
   8   0   3 1392.56   76.39
   8   0   3 1550.24   86.89
   8   0   3 1459.55   98.99
   8   0   3 1572.74   88.19
  -7   0  -3 1105.59   62.99
   7   0   3  993.20   56.99
   7   0   3 1171.58   65.39
   7   0   3  996.30   56.29
   7   0   3 1086.59   65.89
   7   0   3 1056.69   76.09
  -6   0  -3  225.18   22.90
   6   0   3  192.68   23.70
  -5   0  -3   98.99   15.00
   5   0   3  113.59   16.40
   5   0   3  109.49   20.30
   5   0   3  105.99   15.20
   5   0   3   99.09   11.00
   5   0   3  108.49   12.40
  -4   0  -3   57.79    9.10
   4   0   3   62.09   11.70
   4   0   3   79.69   15.70
   4   0   3   66.49   11.20
   4   0   3   60.89    8.50
   3   0   3  202.08   17.10
   3   0   3  218.28   14.60
   3   0   3  170.08   19.50
   3   0   3  210.78   17.70
   2   0   3  334.17   20.50
   2   0   3  364.36   21.70
   2   0   3  381.56   25.30
   2   0   3  352.86   22.70
   1   0   3  890.71   39.70
   1   0   3  716.03   39.10
   1   0   3  685.73   40.40
   1   0   3  843.72   39.00
   0   0   3   29.60    5.40
   0   0   3   42.30    6.40
   0   0   3   49.30    5.70
   0   0   3   43.90    4.50
   1   0  -3  539.85   27.70
  -1   0   3  531.45   26.50
  -1   0   3  546.25   28.90
  -1   0   3  534.35   28.80
  -1   0   3  562.94   27.60
   2   0  -3 4326.97  210.08
   2   0  -3 4332.87  209.88
   2   0  -3 5123.19  210.48
  -2   0   3 4322.07  210.08
  -2   0   3 4407.26  210.58
  -2   0   3 4078.89  208.48
   3   0  -3 3901.71  184.58
   3   0  -3 4032.70  181.98
   3   0  -3 3775.72  185.28
   3   0  -3 3718.13  185.08
  -3   0   3 3864.41  184.98
  -3   0   3 3801.22  182.88
  -3   0   3 3925.71  184.68
   4   0  -3 5313.97  237.08
   4   0  -3 4975.10  241.58
   4   0  -3 5049.69  239.88
   4   0  -3 4843.32  241.28
  -4   0   3 5027.00  240.98
  -4   0   3 4942.21  237.88
  -4   0   3 5011.30  239.28
   5   0  -3 6183.98  286.67
   5   0  -3 6061.79  293.07
   5   0  -3 6008.00  290.27
   5   0  -3 5921.91  292.67
  -5   0   3 6200.18  288.27
  -5   0   3 6078.29  289.17
  -5   0   3 6116.89  292.37
   6   0  -3 1181.78   65.89
   6   0  -3 1141.89   62.09
   6   0  -3 1174.58   58.19
   6   0  -3 1134.99   65.39
  -6   0   3 1150.68   60.49
  -6   0   3 1128.69   66.19
  -6   0   3 1167.38   59.99
   7   0  -3   37.10    7.70
   7   0  -3   32.10   12.30
   7   0  -3   28.40    9.30
   7   0  -3   22.40   10.30
  -7   0   3   38.80   16.20
  -7   0   3   28.20    9.20
  -7   0   3   32.40    7.80
   8   0  -3  178.38   21.90
   8   0  -3  200.48   17.90
   8   0  -3  187.68   26.50
   8   0  -3  233.88   27.70
  -8   0   3  205.28   33.90
  -8   0   3  196.58   21.50
  -8   0   3  212.08   21.00
   9   0  -3   53.39   14.50
   9   0  -3   50.49   17.10
   9   0  -3   42.30   20.00
  -9   0   3   32.80   22.00
  -9   0   3   39.70   14.60
  10   0  -3   -3.40   14.90
  10   0  -3   -1.00   11.20
  10   0  -3  -19.80   16.00
 -10   0   3  -13.20   12.80
 -10   0   3  -17.80   19.20
  11   0  -3   42.30   15.50
  11   0  -3   76.79   23.00
  11   0  -3   56.59   20.80
 -11   0   3   18.90   22.80
 -11   0   3   55.69   16.40
  12   0  -3   42.00   17.90
  12   0  -3   93.49   27.10
  12   0  -3  113.49   28.90
 -12   0   3   20.50   26.60
 -12   0   3   58.29   18.50
 -13   0   3  -46.30   25.90
 -11   1  -2   68.49   26.70
  11  -1   2   46.80   24.20
  11  -1   2   29.90   30.40
  11  -1   2   66.69   27.40
 -10   1  -2  127.69   28.10
  10  -1   2  180.68   32.50
  10  -1   2  215.98   23.10
  10  -1   2  201.38   43.30
  10  -1   2  177.18   32.70
  -9   1  -2   10.70   21.20
   9  -1   2    3.80   17.20
   9  -1   2  -11.10   16.40
   9  -1   2    8.00    9.10
   9  -1   2    5.90   21.70
  -8   1  -2  102.49   25.00
   8  -1   2  106.59   16.00
   8  -1   2  132.49   23.90
   8  -1   2  129.59   33.70
   8  -1   2  130.99   24.60
   8  -1   2  111.39   15.70
  -7   1  -2   94.89   20.80
   7  -1   2   63.09   11.80
   7  -1   2   80.29   18.20
   7  -1   2   84.59   18.20
   7  -1   2   82.69   25.70
   7  -1   2   75.49   12.10
  -6   1  -2   13.90   13.00
   6  -1   2    2.00    9.60
   6  -1   2    4.70    6.40
   6  -1   2    2.90   13.80
   6  -1   2    6.80    7.10
   6  -1   2   -5.70    9.20
  -5   1  -2   94.99   16.70
   5  -1   2  113.49   16.40
   5  -1   2   95.79   12.10
   5  -1   2  111.89   22.30
   5  -1   2  119.89   17.40
   5  -1   2  108.69   13.20
  -4   1  -2   37.80    8.10
   4  -1   2   24.90    5.90
   4  -1   2   30.70    5.60
   4  -1   2   29.30    9.00
   4  -1   2   27.90   11.30
   4  -1   2   26.50    9.00
   3  -1   2  902.71   45.90
   3  -1   2  775.72   52.59
   3  -1   2  970.30   50.39
   3  -1   2  919.91   50.79
   3  -1   2 1040.80   48.00
   2  -1   2   40.90    8.10
   1  -1   2 5571.04  282.57
   1  -1   2 5952.30  280.57
   1  -1   2 6718.13  280.47
   1  -1   2 5572.74  281.37
   0  -1   2 6414.96  295.07
   0  -1   2 6210.88  294.17
   0  -1   2 6120.89  293.27
   1   1  -2 3960.40  183.78
   1   1  -2 3912.51  183.28
  -1  -1   2 4084.49  182.68
  -1  -1   2 3849.91  183.08
  -1  -1   2 3754.72  184.78
  -1  -1   2 3824.52  183.98
   2   1  -2 1350.06   62.29
   2   1  -2 1250.67   61.49
   2   1  -2 1236.48   61.49
  -2  -1   2 1169.48   62.29
  -2  -1   2 1249.18   60.59
  -2  -1   2 1255.57   61.49
   3   1  -2 3504.05  157.38
   3   1  -2 3242.88  155.98
   3   1  -2 3174.08  156.68
  -3  -1   2 3133.09  154.58
  -3  -1   2 3193.08  156.28
  -3  -1   2 3291.37  156.58
   4   1  -2 1206.48   65.19
   4   1  -2 1324.97   66.19
   4   1  -2 1234.08   63.69
  -4  -1   2 1229.48   65.39
  -4  -1   2 1290.17   64.09
  -4  -1   2 1224.08   62.19
   5   1  -2   19.90    7.70
   5   1  -2   26.20    4.30
   5   1  -2   18.00    6.70
   5   1  -2   18.50    8.90
  -5  -1   2   21.60    6.80
  -5  -1   2   18.10    6.20
  -5  -1   2   26.20   10.90
   6   1  -2   28.50    9.60
   6   1  -2   58.79    8.20
   6   1  -2   59.79   12.70
   6   1  -2   48.70    9.10
  -6  -1   2   48.20    8.60
  -6  -1   2   60.79   14.60
  -6  -1   2   38.70    8.30
   7   1  -2  468.45   26.30
   7   1  -2  461.45   31.10
   7   1  -2  492.45   36.10
   7   1  -2  451.75   34.60
  -7  -1   2  475.05   29.50
  -7  -1   2  478.55   38.10
  -7  -1   2  438.56   29.10
   8   1  -2  242.48   29.20
   8   1  -2  243.78   23.60
   8   1  -2  249.97   18.20
   8   1  -2  248.88   27.60
  -8  -1   2  279.57   34.30
  -8  -1   2  236.68   21.00
  -8  -1   2  265.07   22.70
   9   1  -2   43.90   17.30
   9   1  -2   35.90   11.70
   9   1  -2   28.50   15.00
  -9  -1   2   62.69   21.10
  -9  -1   2   56.09   13.40
  10   1  -2    7.00   10.90
  10   1  -2    0.00   15.80
  10   1  -2    3.50   14.20
 -10  -1   2    4.00   19.40
 -10  -1   2    7.50   13.10
  11   1  -2  154.18   26.80
  11   1  -2  156.78   28.10
  11   1  -2  200.58   26.70
 -11  -1   2  183.48   25.40
 -11  -1   2  110.79   26.90
  12   1  -2  644.44   58.59
  12   1  -2  546.05   54.99
  12   1  -2  576.04   45.20
 -12  -1   2  607.74   44.00
 -12  -1   2  584.04   57.39
  13   1  -2  389.16   52.09
  13   1  -2  371.16   48.80
  13   1  -2  319.97   36.30
 -13  -1   2  360.76   35.90
 -13  -1   2  280.97   48.70
 -11   2  -1  -21.10   23.30
  11  -2   1   35.80   12.20
  11  -2   1   15.60   27.00
  11  -2   1   19.90   27.20
  11  -2   1  -31.90   31.10
 -10   2  -1   41.20   23.80
  10  -2   1   57.49   25.10
  10  -2   1   57.19   13.10
  10  -2   1    2.10   30.30
  10  -2   1   55.09   25.50
  -9   2  -1   53.29   23.20
   9  -2   1   56.19   12.50
   9  -2   1   49.90   21.70
   9  -2   1   83.69   23.50
   9  -2   1   81.19   19.20
   9  -2   1   66.09   31.60
  -8   2  -1  253.37   38.70
   8  -2   1  245.78   25.40
   8  -2   1  276.07   46.90
   8  -2   1  277.27   35.90
   8  -2   1  277.07   25.90
   8  -2   1  310.57   35.10
  -7   2  -1  208.18   33.70
   7  -2   1  190.58   21.00
   7  -2   1  187.08   27.90
   7  -2   1  170.88   34.20
   7  -2   1  131.99   22.90
   7  -2   1  146.09   20.90
  -6   2  -1   17.30   15.20
   6  -2   1   25.80    8.70
   6  -2   1   17.70   11.80
   6  -2   1   16.50   17.20
   6  -2   1    7.50   10.10
   6  -2   1    7.00    7.60
  -5   2  -1  819.42   47.60
   5  -2   1  847.22   50.29
   5  -2   1  817.02   45.30
   5  -2   1  814.52   50.09
   5  -2   1  772.72   57.19
   5  -2   1  782.12   44.00
  -4   2  -1  779.72   40.20
   4  -2   1  679.03   48.60
   4  -2   1  604.74   36.80
   4  -2   1  685.63   42.40
  -3   2  -1  917.21   49.60
   3  -2   1  981.00   52.99
   3  -2   1 1008.80   50.79
   3  -2   1 1013.80   57.59
   3  -2   1  969.40   53.19
   3  -2   1  940.81   48.90
   2  -2   1 4121.39  181.98
   2  -2   1 3892.41  185.98
   2  -2   1 3702.33  180.08
   2  -2   1 3563.94  183.18
   2  -2   1 3764.72  182.98
   1  -2   1 1244.58   64.09
   1  -2   1 1154.98   60.59
   1  -2   1 1225.38   63.29
   1  -2   1 1429.36   63.39
   0   2  -1  565.94   27.30
   0   2  -1  461.25   24.20
   0  -2   1  464.65   25.80
   0  -2   1  469.05   25.60
   0  -2   1  486.65   24.50
   0  -2   1  467.95   25.90
  -1  -2   1   55.09    6.30
   2   2  -1  743.73   38.60
   2   2  -1  812.42   39.10
  -2  -2   1  788.32   38.40
  -2  -2   1  787.42   38.10
  -2  -2   1  736.03   38.50
  -2  -2   1  729.73   40.80
   3   2  -1  295.37   19.20
   3   2  -1  246.88   17.50
   3   2  -1  255.77   17.00
  -3  -2   1  239.58   16.50
  -3  -2   1  265.27   20.10
  -3  -2   1  267.37   19.90
   4   2  -1  489.05   30.10
   4   2  -1  486.15   28.90
   4   2  -1  524.95   31.30
  -4  -2   1  515.25   30.20
  -4  -2   1  505.65   31.90
  -4  -2   1  488.75   27.50
   5   2  -1  976.00   56.49
   5   2  -1 1054.19   58.09
   5   2  -1 1144.29   66.19
   5   2  -1 1027.20   54.89
  -5  -2   1 1031.60   57.49
  -5  -2   1 1029.40   55.09
  -5  -2   1 1029.60   53.19
   6   2  -1  255.27   15.30
   6   2  -1  233.48   33.20
   6   2  -1  277.87   24.40
   6   2  -1  241.88   22.40
   6   2  -1  256.07   20.40
  -6  -2   1  256.77   26.80
  -6  -2   1  249.28   18.70
  -6  -2   1  239.18   20.30
   7   2  -1  176.68   12.70
   7   2  -1  176.18   21.90
   7   2  -1  165.68   20.40
   7   2  -1  191.78   30.70
   7   2  -1  158.68   17.60
  -7  -2   1  172.98   26.00
  -7  -2   1  164.68   16.50
  -7  -2   1  174.28   18.00
   8   2  -1 1172.08   59.09
   8   2  -1 1175.88   70.39
   8   2  -1 1134.59   64.49
   8   2  -1 1143.09   68.69
   8   2  -1 1225.58   82.59
  -8  -2   1 1202.78   70.89
  -8  -2   1 1115.49   62.19
  -8  -2   1 1170.98   62.59
   9   2  -1    4.60   23.60
   9   2  -1    1.00   10.10
   9   2  -1   12.80    8.60
   9   2  -1  -12.10   10.50
   9   2  -1    3.00   13.30
  -9  -2   1   16.00   18.20
  -9  -2   1   14.90   10.80
  10   2  -1  150.28   23.90
  10   2  -1  134.19   24.90
  10   2  -1  123.19   18.60
 -10  -2   1  153.08   26.20
 -10  -2   1  216.38   23.90
  11   2  -1  627.74   53.29
  11   2  -1  562.84   42.30
  11   2  -1  679.23   53.29
 -11  -2   1  541.45   51.89
 -11  -2   1  619.54   42.00
  12   2  -1  190.38   30.90
  12   2  -1  159.58   29.70
  12   2  -1  115.09   19.50
 -12  -2   1  114.49   20.40
 -12  -2   1  104.29   28.10
  13   2  -1   20.60   13.60
  13   2  -1   39.20   22.60
  13   2  -1   39.00   23.30
 -13  -2   1   23.20   24.50
 -13  -2   1   37.50   17.50
 -11   3   0    5.00   25.80
  11  -3   0  -11.10   25.70
  11  -3   0   66.29   28.70
  11  -3   0   24.60   12.60
 -10   3   0   -6.90   22.10
  10  -3   0   -6.20   22.60
  10  -3   0   15.50   10.50
  10  -3   0   33.70   23.80
  10  -3   0  -42.00   28.30
  -9   3   0  -12.00   20.00
   9  -3   0  -18.90   17.80
   9  -3   0    6.90   18.60
   9  -3   0   -7.60    9.10
   9  -3   0  -40.50   24.10
  -8   3   0  283.47   40.30
   8  -3   0  374.96   39.70
   8  -3   0  300.57   52.39
   8  -3   0  405.56   39.30
   8  -3   0  335.37   30.10
   8  -3   0  369.76   30.90
  -7   3   0 1584.74   93.69
   7  -3   0 1805.82  109.69
   7  -3   0 1659.73   88.49
   7  -3   0 1661.43   95.09
   7  -3   0 1752.62   95.79
   7  -3   0 1581.84   87.29
  -6   3   0 1632.94   85.69
   6  -3   0 1593.44   97.89
   6  -3   0 1454.65   81.09
   6  -3   0 1564.94   87.19
   6  -3   0 1542.55   86.59
   6  -3   0 1484.95   80.39
  -5   3   0  223.48   25.20
   5  -3   0   96.19   22.30
   5  -3   0  151.48   17.00
   5  -3   0  159.88   22.70
   5  -3   0  145.39   18.90
   5  -3   0  155.88   20.80
  -4   3   0 1031.50   55.49
   4  -3   0  990.10   57.09
   4  -3   0  993.70   57.69
   4  -3   0 1022.70   53.09
   4  -3   0 1058.39   65.09
   4  -3   0  955.50   54.29
  -3   3   0 1633.74   79.49
   3  -3   0 1659.53   80.49
   3  -3   0 1557.14   82.19
   3  -3   0 1550.64   86.99
   3  -3   0 1484.65   81.59
   3  -3   0 1606.54   78.49
  -2   3   0  749.73   35.60
   2  -3   0  718.13   41.80
   2  -3   0  637.44   35.10
   2  -3   0  558.04   37.50
  -1   3   0  640.64   33.60
  -1   3   0  710.73   35.20
   1  -3   0  724.43   35.70
   1  -3   0  623.94   37.30
   0   3   0   58.29    5.30
   0  -3   0   55.09    7.50
   0  -3   0   53.89    7.00
   0  -3   0   47.60    6.30
   0  -3   0   55.49    7.90
   1   3   0  571.64   31.50
   1   3   0  544.15   28.40
  -1  -3   0  581.74   31.40
  -1  -3   0  539.05   28.30
  -1  -3   0  582.54   29.40
  -1  -3   0  510.75   29.20
   2   3   0 1419.86   68.89
   2   3   0 1316.97   71.09
   2   3   0 1419.66   68.79
  -2  -3   0 1361.36   68.49
  -2  -3   0 1523.25   67.99
  -2  -3   0 1457.25   68.79
  -2  -3   0 1453.75   68.39
  -2  -3   0 1343.27   71.29
   3   3   0 1296.87   64.09
   3   3   0 1288.17   64.19
   3   3   0 1149.29   65.49
  -3  -3   0 1287.97   61.89
  -3  -3   0 1363.46   63.29
  -3  -3   0 1396.76   65.29
  -3  -3   0 1301.77   63.29
  -3  -3   0 1213.48   66.09
   4   3   0  395.96   25.20
   4   3   0  430.26   26.30
   4   3   0  455.85   34.20
   4   3   0  458.25   27.80
  -4  -3   0  415.56   24.40
  -4  -3   0  447.86   28.70
  -4  -3   0  396.16   27.20
   5   3   0  249.18   29.40
   5   3   0  223.48   17.70
   5   3   0  229.48   19.10
   5   3   0  202.68   20.00
  -5  -3   0  231.38   16.50
  -5  -3   0  237.98   22.30
  -5  -3   0  215.38   19.40
   6   3   0 1685.53   90.29
   6   3   0 1658.03   88.59
   6   3   0 1719.63   86.49
   6   3   0 1740.23   98.79
   6   3   0 1714.93   81.79
  -6  -3   0 1683.13   84.49
  -6  -3   0 1689.43   89.09
  -6  -3   0 1660.73   86.79
   7   3   0  392.16   30.30
   7   3   0  402.76   42.60
   7   3   0  421.76   28.00
   7   3   0  405.26   32.20
  -7  -3   0  389.46   28.10
  -7  -3   0  418.86   33.90
  -7  -3   0  370.76   25.80
   8   3   0  449.46   36.10
   8   3   0  419.06   37.40
   8   3   0  494.55   33.00
   8   3   0  501.85   27.70
   8   3   0  497.65   50.19
  -8  -3   0  476.45   32.70
  -8  -3   0  494.25   31.60
  -8  -3   0  505.05   40.90
   9   3   0 2413.66  136.49
   9   3   0 2191.58  121.69
   9   3   0 2650.73  116.99
   9   3   0 2079.29  122.89
   9   3   0 2193.98  116.59
  -9  -3   0 2144.49  114.39
  -9  -3   0 2206.78  121.49
  10   3   0 1097.29   82.89
  10   3   0  988.50   67.69
  10   3   0  971.70   58.79
  10   3   0 1010.40   65.49
 -10  -3   0  957.70   66.99
 -10  -3   0  928.21   57.09
  11   3   0  136.29   27.10
  11   3   0  178.28   23.50
  11   3   0  177.48   27.80
  11   3   0  123.29   37.90
 -11  -3   0  160.68   28.20
 -11  -3   0  168.98   23.90
  12   3   0   58.79   22.80
  12   3   0   34.40   12.90
  12   3   0   55.79   21.20
 -12  -3   0   69.89   16.50
 -12  -3   0   58.99   23.50
  13   3   0   28.70   21.80
  13   3   0    6.10   12.70
  13   3   0   23.00   21.10
 -13  -3   0   32.80   17.10
 -13  -3   0  -12.30   21.50
 -10   4   1   -7.50   22.70
  10  -4  -1   38.90   24.50
  10  -4  -1    6.10   24.40
  10  -4  -1   18.10   11.90
  -9   4   1   92.49   26.40
   9  -4  -1  158.28   31.20
   9  -4  -1   87.89   38.30
   9  -4  -1  133.99   22.30
  -8   4   1  397.46   43.30
   8  -4  -1  288.87   32.00
   8  -4  -1  354.26   56.89
   8  -4  -1  401.26   40.50
   8  -4  -1  425.06   43.50
   8  -4  -1  417.26   34.20
  -7   4   1  454.95   43.00
   7  -4  -1  355.66   31.70
   7  -4  -1  323.17   53.49
  -6   4   1   91.59   21.30
   6  -4  -1   32.80   13.70
   6  -4  -1   50.69   15.90
   6  -4  -1   56.09   12.70
   6  -4  -1   21.20   12.70
   6  -4  -1   38.10   22.80
  -5   4   1    1.80   15.00
   5  -4  -1    9.50   11.00
   5  -4  -1    0.50    8.70
   5  -4  -1    3.60   11.50
   5  -4  -1   11.90   10.80
   5  -4  -1   22.00   18.70
  -4   4   1   58.89   14.20
   4  -4  -1   40.20    9.50
   4  -4  -1   40.30   10.90
   4  -4  -1   46.70   12.50
   4  -4  -1   45.80   17.40
   4  -4  -1   36.00   11.60
  -3   4   1  288.77   18.50
  -3   4   1  302.17   23.10
   3  -4  -1  223.28   22.90
   3  -4  -1  229.88   21.20
   3  -4  -1  261.07   29.70
   3  -4  -1  235.28   19.10
   3  -4  -1  249.97   23.90
  -2   4   1  718.13   37.40
  -2   4   1  700.63   38.30
   2  -4  -1  729.93   40.10
   2  -4  -1  665.73   43.70
   2  -4  -1  747.43   40.50
   2  -4  -1  713.93   41.10
   2  -4  -1  643.94   37.50
  -1   4   1  721.93   34.30
  -1   4   1  714.43   33.20
   1  -4  -1  527.65   35.00
   1  -4  -1  656.53   37.20
   1  -4  -1  525.65   32.90
   0   4   1  253.07   16.10
   0  -4  -1  173.28   13.80
   0  -4  -1  188.58   16.20
   0  -4  -1  253.87   16.30
   1   4   1 1727.23   89.39
   1   4   1 1995.50   91.39
  -1  -4  -1 1787.22   89.69
  -1  -4  -1 1771.52   89.79
  -1  -4  -1 1828.32   90.59
  -1  -4  -1 2049.70   92.29
   2   4   1 1419.36   72.19
   2   4   1 1436.76   74.29
   2   4   1 1454.25   71.99
  -2  -4  -1 1567.54   72.39
  -2  -4  -1 1534.15   72.29
  -2  -4  -1 1448.46   72.39
  -2  -4  -1 1416.86   74.79
  -2  -4  -1 1561.24   71.39
  -2  -4  -1 1501.65   72.09
   3   4   1   18.30    5.40
   3   4   1    9.00    4.00
   3   4   1   19.30    9.50
   3   4   1   27.20    7.00
   3   4   1   27.90    5.50
   3   4   1   16.40    6.40
  -3  -4  -1   14.70    5.90
  -3  -4  -1   15.30    3.60
  -3  -4  -1   23.80    7.60
  -3  -4  -1   19.50    5.20
  -3  -4  -1   16.50    5.00
   4   4   1 2752.52  137.69
   4   4   1 2647.73  136.99
   4   4   1 2886.81  133.49
   4   4   1 2888.71  142.89
   4   4   1 2850.41  136.29
   4   4   1 2905.31  135.89
  -4  -4  -1 2579.14  137.59
  -4  -4  -1 2784.92  136.59
  -4  -4  -1 2882.11  134.69
  -4  -4  -1 2893.61  134.49
  -4  -4  -1 2809.82  134.69
   5   4   1 2190.68  106.19
   5   4   1 2309.27  109.79
   5   4   1 2117.39  115.19
   5   4   1 2165.38  102.69
   5   4   1 2060.49  106.89
   5   4   1 2199.28  107.29
  -5  -4  -1 2173.08  104.39
  -5  -4  -1 2120.89  104.49
  -5  -4  -1 2019.50  107.49
  -5  -4  -1 2095.59  107.29
   6   4   1  248.38   19.30
   6   4   1  222.68   31.10
   6   4   1  278.07   24.10
   6   4   1  227.88   14.80
   6   4   1  227.28   21.10
  -6  -4  -1  248.78   25.10
  -6  -4  -1  233.88   21.40
  -6  -4  -1  250.67   18.40
   7   4   1  154.58   18.60
   7   4   1  148.59   16.20
   7   4   1  160.78   11.90
   7   4   1  165.28   27.30
   7   4   1  163.18   21.50
  -7  -4  -1  168.68   24.30
  -7  -4  -1  151.68   18.80
  -7  -4  -1  146.89   15.70
   8   4   1   16.70   11.70
   8   4   1   10.30    9.10
   8   4   1   18.80    5.50
   8   4   1   16.20   18.40
   8   4   1   19.80    8.10
  -8  -4  -1   16.20    9.60
  -8  -4  -1    3.70   13.90
  -8  -4  -1   18.50    8.50
   9   4   1   13.90   22.60
   9   4   1    5.60    6.60
   9   4   1   21.30    9.50
   9   4   1   10.70   12.00
   9   4   1    1.10   15.60
  -9  -4  -1    9.20   18.40
  -9  -4  -1    2.50   10.50
  -9  -4  -1    8.50   11.10
  10   4   1   62.59   16.80
  10   4   1   61.89   13.90
  10   4   1   88.89   30.30
  10   4   1   31.20   18.40
 -10  -4  -1   52.49   14.60
 -10  -4  -1   94.99   24.40
  11   4   1  151.48   27.10
  11   4   1  104.39   22.40
  11   4   1  100.69   16.90
  11   4   1  124.19   36.20
 -11  -4  -1  128.49   25.10
 -11  -4  -1  172.18   22.60
  12   4   1  162.08   30.50
  12   4   1  182.38   24.50
  12   4   1  172.08   46.70
  12   4   1  165.58   27.40
 -12  -4  -1  142.59   28.80
 -12  -4  -1  190.78   25.70
  13   4   1   63.09   21.70
  13   4   1   25.70   12.70
  13   4   1   49.40   25.00
 -13  -4  -1   21.60   23.30
 -13  -4  -1   32.40   16.00
  10  -5  -2  141.99   33.10
  10  -5  -2  128.29   34.50
   9  -5  -2  234.08   30.20
   9  -5  -2  272.87   38.90
   9  -5  -2  177.38   33.60
   9  -5  -2  172.08   26.10
   8  -5  -2  329.37   39.20
   8  -5  -2  281.17   33.80
   8  -5  -2  282.17   32.30
   8  -5  -2  312.27   40.90
   7  -5  -2  120.79   20.30
   7  -5  -2  101.19   19.80
   7  -5  -2  123.99   25.60
   7  -5  -2  143.59   27.40
  -6   5   2  220.88   34.50
   6  -5  -2  236.78   29.50
   6  -5  -2  208.28   36.50
   6  -5  -2  249.38   29.20
   6  -5  -2  270.47   32.80
   6  -5  -2  245.08   26.00
  -5   5   2   71.29   18.10
   5  -5  -2   39.50   11.90
   5  -5  -2   38.40   12.00
   5  -5  -2   22.90   19.90
   5  -5  -2   23.00   13.90
   5  -5  -2   44.10   15.00
  -4   5   2  799.32   50.39
   4  -5  -2  862.31   48.30
   4  -5  -2  890.81   53.19
   4  -5  -2  898.91   50.99
   4  -5  -2  867.61   51.99
   4  -5  -2  772.52   58.19
  -3   5   2 1669.63   80.39
  -3   5   2 1635.54   82.09
   3  -5  -2 1636.44   85.39
   3  -5  -2 1677.73   83.99
   3  -5  -2 1617.14   84.09
   3  -5  -2 1457.35   87.79
   3  -5  -2 1524.95   81.09
  -2   5   2  410.86   25.80
  -2   5   2  403.06   25.80
  -1   5   2  231.98   17.40
  -1   5   2  241.08   14.80
   1  -5  -2  195.68   15.80
   1  -5  -2  242.08   20.00
   1  -5  -2  228.78   16.90
   1  -5  -2  192.28   18.20
   0  -5  -2  154.78   13.20
   0  -5  -2  184.38   13.40
   0  -5  -2  188.98   15.70
   1   5   2   73.79    8.10
  -1  -5  -2   85.49    8.90
  -1  -5  -2  107.19   11.70
  -1  -5  -2   77.59    9.00
   2   5   2 2131.29  111.19
   2   5   2 2377.26  109.89
  -2  -5  -2 2254.77  110.09
  -2  -5  -2 2306.67  110.19
  -2  -5  -2 2323.97  109.89
  -2  -5  -2 2373.56  109.59
  -2  -5  -2 2167.68  112.29
   3   5   2 3001.00  150.08
   3   5   2 3213.38  148.19
   3   5   2 3152.28  148.09
   3   5   2 3042.80  151.58
  -3  -5  -2 3105.19  148.09
  -3  -5  -2 3007.40  151.08
  -3  -5  -2 3060.59  147.79
  -3  -5  -2 3097.89  147.69
  -3  -5  -2 3158.48  147.39
  -3  -5  -2 3077.39  147.69
   4   5   2 1462.45   82.59
   4   5   2 1550.04   75.29
   4   5   2 1623.44   78.89
   4   5   2 1570.04   76.79
   4   5   2 1433.96   78.09
   4   5   2 1599.34   76.49
  -4  -5  -2 1557.14   75.49
  -4  -5  -2 1517.85   75.59
  -4  -5  -2 1452.25   76.69
  -4  -5  -2 1471.55   79.09
  -4  -5  -2 1554.94   75.59
  -4  -5  -2 1579.34   75.99
   5   5   2    3.40   11.90
   5   5   2    4.30    8.50
   5   5   2   13.20    5.00
   5   5   2    9.10    5.50
   5   5   2    6.10    7.50
   5   5   2   11.40    7.10
  -5  -5  -2   13.30    4.40
  -5  -5  -2   14.20    6.00
  -5  -5  -2    9.10    7.40
  -5  -5  -2   16.10    6.70
  -5  -5  -2   25.10    9.60
   6   5   2   68.69    8.80
   6   5   2   66.29   11.10
   6   5   2   70.19   11.60
   6   5   2   82.69   20.30
   6   5   2   89.49   15.20
   6   5   2   72.49   10.80
  -6  -5  -2   77.29   10.80
  -6  -5  -2   72.29   14.10
  -6  -5  -2   71.19   12.40
  -6  -5  -2   71.19    9.20
   7   5   2    7.00    9.40
   7   5   2   10.40    4.10
   7   5   2    0.60    6.90
   7   5   2   10.80    6.60
   7   5   2   14.30   15.70
  -7  -5  -2   17.30   12.60
  -7  -5  -2    7.70    7.90
  -7  -5  -2    9.70    7.00
   8   5   2  133.09   12.80
   8   5   2  123.99   15.90
   8   5   2  134.19   18.50
   8   5   2  116.49   20.70
   8   5   2  124.89   28.00
  -8  -5  -2  125.99   15.60
  -8  -5  -2  143.39   21.60
  -8  -5  -2  131.39   21.10
   9   5   2 1942.41  114.59
   9   5   2 2208.18  103.49
   9   5   2 2036.70  107.39
   9   5   2 2054.79  111.69
   9   5   2 2049.79  125.89
  -9  -5  -2 2023.70  105.99
  -9  -5  -2 2167.58  109.29
  -9  -5  -2 2183.88  113.59
  10   5   2 1095.19   71.99
  10   5   2 1098.39   67.89
  10   5   2 1074.49   84.19
  10   5   2 1090.99   62.29
 -10  -5  -2 1071.09   70.39
 -10  -5  -2 1050.49   61.19
  11   5   2  211.68   42.90
  11   5   2  176.88   25.80
  11   5   2  177.28   29.90
  11   5   2  166.88   22.30
 -11  -5  -2  132.79   27.50
 -11  -5  -2  147.99   22.60
  12   5   2  341.47   31.00
  12   5   2  408.56   40.70
  12   5   2  336.57   55.59
  12   5   2  341.87   43.20
 -12  -5  -2  332.27   43.20
 -12  -5  -2  356.16   32.30
  13   5   2  286.87   30.10
  13   5   2  238.78   38.60
  13   5   2  293.67   40.60
  13   5   2  251.07   56.99
 -13  -5  -2  273.27   31.00
 -13  -5  -2  203.68   34.60
 -14  -5  -2  -20.60   24.90
   9  -6  -3   16.80   20.30
   9  -6  -3   67.79   18.10
   9  -6  -3   60.19   27.80
   8  -6  -3  288.77   35.60
   8  -6  -3  329.27   42.50
   8  -6  -3  338.97   34.60
   8  -6  -3  391.66   45.70
   7  -6  -3  598.44   44.40
   7  -6  -3  619.24   51.29
   7  -6  -3  488.55   45.40
  -6   6   3   41.80   22.50
   6  -6  -3   34.30   14.70
   6  -6  -3   69.89   19.30
   6  -6  -3    3.40   14.20
   6  -6  -3   58.49   14.90
  -5   6   3  221.88   31.40
   5  -6  -3  247.08   31.40
   5  -6  -3  260.07   26.30
   5  -6  -3  238.18   32.40
   5  -6  -3  229.68   25.40
   4  -6  -3   43.40   14.70
   4  -6  -3   77.09   14.20
  -3   6   3  514.95   33.90
  -3   6   3  560.44   34.80
   3  -6  -3  625.44   36.70
   3  -6  -3  551.44   38.60
   3  -6  -3  577.44   39.70
   3  -6  -3  598.24   35.50
  -2   6   3 1859.31   91.09
  -2   6   3 1901.61   93.49
   2  -6  -3 1819.92   93.29
   2  -6  -3 1789.82   95.39
   2  -6  -3 1897.91   96.69
   2  -6  -3 1892.81   94.39
   1  -6  -3  653.33   36.60
   1  -6  -3  621.84   36.80
   1  -6  -3  673.43   39.40
   0   6   3    3.60    6.50
   0  -6  -3    1.00    6.80
   0  -6  -3    1.90    4.30
   0  -6  -3   -4.60    6.00
   0  -6  -3    1.10    5.20
   1   6   3  227.88   18.00
  -1  -6  -3  184.68   14.90
  -1  -6  -3  238.88   17.10
  -1  -6  -3  196.98   16.80
  -1  -6  -3  166.88   13.40
  -2  -6  -3   26.90    6.30
  -2  -6  -3   41.90    7.50
   3   6   3  222.58   20.00
   3   6   3  226.28   19.90
   3   6   3  255.37   16.60
  -3  -6  -3  271.47   16.90
  -3  -6  -3  210.98   16.40
  -3  -6  -3  272.47   17.60
  -3  -6  -3  250.77   17.70
  -3  -6  -3  270.57   16.90
  -3  -6  -3  230.58   20.00
   4   6   3 3100.89  165.18
   4   6   3 3332.87  160.08
   4   6   3 3342.57  160.08
   4   6   3 3234.48  162.38
   4   6   3 3346.57  159.98
   4   6   3 3778.82  162.68
  -4  -6  -3 3257.97  159.68
  -4  -6  -3 3277.37  159.48
  -4  -6  -3 3252.47  159.48
  -4  -6  -3 3243.48  163.58
  -4  -6  -3 3415.06  159.28
  -4  -6  -3 3340.37  160.38
   5   6   3 4048.59  207.08
   5   6   3 4335.77  205.78
   5   6   3 4128.99  213.08
   5   6   3 4361.86  205.28
   5   6   3 4372.26  204.28
   5   6   3 4545.75  208.88
  -5  -6  -3 4249.88  204.28
  -5  -6  -3 4322.07  204.38
  -5  -6  -3 4345.27  204.38
  -5  -6  -3 4039.30  208.28
  -5  -6  -3 4206.98  205.58
  -5  -6  -3 4386.66  205.58
   6   6   3 1199.68   60.89
   6   6   3 1170.48   63.59
   6   6   3 1157.28   65.19
   6   6   3 1290.27   68.09
   6   6   3 1198.08   73.89
   6   6   3 1246.08   62.79
  -6  -6  -3 1186.68   62.49
  -6  -6  -3 1131.09   64.39
  -6  -6  -3 1172.08   66.19
  -6  -6  -3 1184.18   61.49
  -6  -6  -3 1214.58   61.99
   7   6   3  185.98   21.20
   7   6   3  189.08   24.70
   7   6   3  155.38   19.40
   7   6   3  220.88   16.00
   7   6   3  200.08   32.80
   7   6   3  205.38   18.20
  -7  -6  -3  197.18   16.50
  -7  -6  -3  211.18   18.60
  -7  -6  -3  199.68   17.40
  -7  -6  -3  190.18   24.80
  -7  -6  -3  186.88   21.70
   8   6   3  518.45   30.20
   8   6   3  550.44   51.29
   8   6   3  550.04   41.90
   8   6   3  493.55   35.70
   8   6   3  509.95   36.10
   8   6   3  528.95   33.50
  -8  -6  -3  506.95   36.90
  -8  -6  -3  516.85   33.40
  -8  -6  -3  534.25   32.80
  -8  -6  -3  493.15   40.30
   9   6   3   22.00    8.70
   9   6   3   25.80   15.80
   9   6   3   12.70    6.70
   9   6   3   14.80   20.80
   9   6   3   25.00   11.00
  -9  -6  -3   28.50   12.60
  -9  -6  -3   -1.50   17.70
  -9  -6  -3   14.20   10.50
  10   6   3  522.95   40.50
  10   6   3  506.55   57.49
  10   6   3  533.15   35.50
  10   6   3  390.56   42.70
 -10  -6  -3  451.15   46.10
 -10  -6  -3  479.95   35.20
  11   6   3  436.46   59.69
  11   6   3  458.05   34.90
  11   6   3  527.15   42.50
  11   6   3  432.26   45.30
 -11  -6  -3  513.85   47.60
 -11  -6  -3  464.15   35.40
  12   6   3   10.70   16.80
  12   6   3   54.19   17.00
  12   6   3   -3.00   28.80
  12   6   3   36.20   12.50
 -12  -6  -3   10.70   21.20
 -12  -6  -3   17.60   12.90
  13   6   3  179.08   35.20
  13   6   3  160.28   46.80
  13   6   3  191.68   30.80
 -13  -6  -3  161.18   23.40
 -13  -6  -3  144.09   30.00
  14   6   3  148.79   54.89
  14   6   3  186.18   30.50
 -14  -6  -3  173.28   34.40
   9  -7  -4  101.89   27.60
   9  -7  -4  116.89   32.60
   8  -7  -4    6.50   20.80
   8  -7  -4   -0.10   17.90
   8  -7  -4    8.30   14.40
   7  -7  -4  104.49   22.50
   7  -7  -4   99.39   20.20
   7  -7  -4  122.59   27.80
   6  -7  -4   63.29   19.50
   6  -7  -4   94.59   19.50
   6  -7  -4   76.59   22.80
   5  -7  -4   29.60   16.30
   5  -7  -4   10.10   13.00
   5  -7  -4    4.20   11.70
   5  -7  -4    3.90   15.20
  -4   7   4  124.89   19.00
   4  -7  -4  143.39   18.80
   4  -7  -4  149.69   22.90
   4  -7  -4  120.69   21.20
   4  -7  -4  130.39   19.60
  -3   7   4   46.30   10.50
   3  -7  -4   26.70   12.00
   3  -7  -4   32.20    9.80
   3  -7  -4   41.80   14.70
   3  -7  -4   40.20   11.10
  -2   7   4    8.50    8.90
   2  -7  -4   12.40   11.70
   2  -7  -4   22.60   10.70
   2  -7  -4    8.70    7.10
   2  -7  -4   17.90    8.60
  -1   7   4   -9.70    8.20
   1  -7  -4   -6.40    8.10
   1  -7  -4    0.00    9.10
   1  -7  -4    3.10    7.30
   0   7   4   10.10    8.20
   0  -7  -4   14.30    8.60
   0  -7  -4    3.20    6.70
   0  -7  -4    2.90    7.70
   1   7   4  105.49   15.40
  -1  -7  -4   70.39   11.40
  -1  -7  -4   65.09    9.60
  -1  -7  -4   67.49   10.70
   2   7   4   47.40    7.70
   2   7   4   60.59   10.50
  -2  -7  -4   83.09   12.40
  -2  -7  -4   56.59    9.40
  -2  -7  -4   58.89    8.80
   3   7   4 2154.98  107.59
   3   7   4 2131.69  104.49
  -3  -7  -4 2117.59  104.89
  -3  -7  -4 2150.48  102.49
  -3  -7  -4 2223.68  103.79
  -3  -7  -4 2187.78  105.99
  -3  -7  -4 2078.39  104.69
  -3  -7  -4 2039.10  108.29
   4   7   4  352.96   25.60
   4   7   4  325.97   20.90
   4   7   4  329.97   27.30
   4   7   4  352.76   21.80
   4   7   4  309.97   24.80
  -4  -7  -4  309.27   21.90
  -4  -7  -4  331.97   22.20
  -4  -7  -4  321.17   21.10
  -4  -7  -4  340.17   20.90
  -4  -7  -4  318.47   21.20
  -4  -7  -4  312.87   25.00
   5   7   4  266.27   24.40
   5   7   4  290.07   19.10
   5   7   4  281.67   20.40
   5   7   4  242.68   21.50
   5   7   4  266.17   27.90
   5   7   4  205.18   23.10
  -5  -7  -4  275.47   19.20
  -5  -7  -4  252.37   21.20
  -5  -7  -4  280.27   19.90
  -5  -7  -4  268.57   19.90
  -5  -7  -4  273.97   24.20
  -5  -7  -4  293.07   20.50
   6   7   4 2532.65  130.79
   6   7   4 2648.33  128.89
   6   7   4 2510.65  138.29
   6   7   4 2621.64  127.39
   6   7   4 2791.02  133.29
   6   7   4 2588.04  127.99
  -6  -7  -4 2666.43  128.89
  -6  -7  -4 2653.63  127.39
  -6  -7  -4 2473.15  131.89
  -6  -7  -4 2566.74  126.99
  -6  -7  -4 2513.25  128.79
  -6  -7  -4 2620.54  127.19
   7   7   4  668.63   37.30
   7   7   4  717.93   46.20
   7   7   4  634.84   52.19
   7   7   4  634.04   38.00
   7   7   4  650.53   40.20
   7   7   4  598.24   42.00
  -7  -7  -4  642.44   37.50
  -7  -7  -4  639.84   38.30
  -7  -7  -4  610.44   37.30
  -7  -7  -4  660.73   38.20
  -7  -7  -4  649.04   43.30
  -7  -7  -4  602.34   41.70
   8   7   4   71.49   13.80
   8   7   4   76.79   11.90
   8   7   4   60.29    9.50
   8   7   4   62.09   12.80
   8   7   4   86.29   26.10
   8   7   4   54.89   17.70
  -8  -7  -4   61.99   10.90
  -8  -7  -4   41.90   17.70
  -8  -7  -4   64.39   14.40
  -8  -7  -4   54.39   10.10
  -8  -7  -4   64.79   12.40
   9   7   4  100.79   14.70
   9   7   4  121.69   30.30
   9   7   4  119.89   16.40
   9   7   4  129.99   24.40
   9   7   4   99.59   16.70
   9   7   4  121.19   18.60
  -9  -7  -4  101.69   14.80
  -9  -7  -4  107.79   18.60
  -9  -7  -4  114.89   14.90
  -9  -7  -4   97.29   22.00
  -9  -7  -4  136.09   17.30
  10   7   4  386.36   30.20
  10   7   4  399.86   53.19
  10   7   4  420.56   41.90
  10   7   4  386.56   35.00
 -10  -7  -4  377.46   31.10
 -10  -7  -4  360.96   42.80
  11   7   4   55.49   16.30
  11   7   4   30.40   20.50
  11   7   4   51.99   29.00
  11   7   4   27.60   11.20
 -11  -7  -4   38.60   20.30
 -11  -7  -4   33.40   13.50
  12   7   4   67.39   14.50
  12   7   4   75.89   24.20
  12   7   4   42.50   31.50
  12   7   4   73.29   19.60
 -12  -7  -4   47.00   22.80
 -12  -7  -4   63.89   16.50
  13   7   4   99.19   23.30
  13   7   4   58.59   26.80
  13   7   4   76.49   38.90
 -13  -7  -4   87.29   19.20
 -13  -7  -4   88.49   27.60
  14   7   4   41.50   18.60
  14   7   4  -46.60   35.10
 -14  -7  -4    1.40   23.10
   8  -8  -5   36.30   25.10
   8  -8  -5    6.70   20.50
   8  -8  -5   49.10   18.00
   7  -8  -5   10.00   18.20
   7  -8  -5   11.30   17.00
   7  -8  -5   27.70   22.30
   6  -8  -5  379.46   43.80
   6  -8  -5  325.97   39.50
   6  -8  -5  434.56   38.10
   5  -8  -5  102.89   23.70
   5  -8  -5   65.69   20.30
   5  -8  -5  119.59   20.40
  -4   8   5   27.50   14.60
   4  -8  -5   38.10   14.80
   4  -8  -5   15.50   16.10
   4  -8  -5   23.50   16.10
  -3   8   5  352.46   30.80
   3  -8  -5  356.36   36.10
   3  -8  -5  460.85   36.00
   3  -8  -5  452.55   32.00
  -2   8   5  704.43   44.60
   2  -8  -5  773.82   44.70
   2  -8  -5  794.02   48.60
   2  -8  -5  656.13   46.80
  -1   8   5  505.25   33.50
   1  -8  -5  438.16   33.90
   1  -8  -5  457.15   31.00
   1  -8  -5  432.86   33.60
   0   8   5   46.70   11.40
   0  -8  -5   42.60   11.80
   0  -8  -5   54.59   10.80
   0  -8  -5   59.79   12.00
   1   8   5 2996.50  140.99
  -1  -8  -5 2836.62  139.99
  -1  -8  -5 2934.91  138.79
  -1  -8  -5 2540.65  138.99
   2   8   5 2589.74  120.79
  -2  -8  -5 2216.28  117.29
  -2  -8  -5 2368.86  118.99
  -2  -8  -5 2390.86  118.59
   3   8   5  414.06   28.70
  -3  -8  -5  329.77   25.20
  -3  -8  -5  361.36   25.40
   4   8   5   34.30    6.80
   4   8   5   31.90   10.30
   4   8   5   35.70   10.20
  -4  -8  -5   32.30    7.80
  -4  -8  -5   35.90    9.10
  -4  -8  -5   45.90   10.60
  -4  -8  -5   33.10    8.30
  -4  -8  -5   31.10    7.00
  -4  -8  -5   40.20    8.30
   5   8   5    5.50   10.00
   5   8   5    9.40    9.10
   5   8   5   27.30   10.60
   5   8   5   15.50    7.70
   5   8   5   11.60   10.30
   5   8   5    5.00    4.40
  -5  -8  -5    9.70    7.20
  -5  -8  -5    5.10    5.60
  -5  -8  -5   17.70    8.00
  -5  -8  -5   14.40    7.50
  -5  -8  -5   12.00    6.30
  -5  -8  -5   16.10    8.20
   6   8   5  785.92   54.89
   6   8   5  958.70   50.89
   6   8   5  961.20   55.89
   6   8   5  961.70   52.69
   6   8   5 1001.40   51.89
   6   8   5  897.01   61.69
  -6  -8  -5  905.01   50.59
  -6  -8  -5  964.50   50.89
  -6  -8  -5  989.10   52.69
  -6  -8  -5  934.61   50.59
  -6  -8  -5  951.00   56.59
  -6  -8  -5  878.31   51.89
   7   8   5  682.33   45.80
   7   8   5  697.83   42.00
   7   8   5  700.53   40.10
   7   8   5  663.73   54.49
   7   8   5  712.63   41.40
   7   8   5  616.24   46.90
  -7  -8  -5  688.33   46.10
  -7  -8  -5  692.73   40.70
  -7  -8  -5  638.64   44.10
  -7  -8  -5  663.33   39.80
  -7  -8  -5  707.93   40.20
  -7  -8  -5  713.03   41.40
   8   8   5  163.18   26.30
   8   8   5  111.89   21.40
   8   8   5  145.99   28.80
   8   8   5  149.99   17.10
   8   8   5  136.49   20.30
   8   8   5  161.28   18.70
  -8  -8  -5  148.19   19.50
  -8  -8  -5  148.29   16.60
  -8  -8  -5  125.69   20.60
  -8  -8  -5  136.79   17.70
  -8  -8  -5  130.59   17.70
  -8  -8  -5  148.39   24.90
   9   8   5  184.38   24.50
   9   8   5  177.18   20.50
   9   8   5  215.58   30.10
   9   8   5  165.48   19.50
   9   8   5  133.79   33.20
   9   8   5  144.29   21.00
  -9  -8  -5  163.08   25.30
  -9  -8  -5  148.59   23.00
  -9  -8  -5  156.18   22.00
  -9  -8  -5  178.58   19.40
  -9  -8  -5  154.78   21.20
  -9  -8  -5  153.88   20.60
  10   8   5   67.89   28.10
  10   8   5   67.69   13.80
  10   8   5   64.99   16.10
  10   8   5   54.39   20.60
  10   8   5   57.09   18.60
 -10  -8  -5   29.30   17.70
 -10  -8  -5   73.29   14.90
 -10  -8  -5   93.59   22.00
 -10  -8  -5   84.19   14.10
  11   8   5  217.78   23.00
  11   8   5  195.48   40.10
  11   8   5  228.78   28.40
  11   8   5  198.38   32.80
 -11  -8  -5  180.68   28.60
 -11  -8  -5  212.68   24.90
 -11  -8  -5  191.88   23.30
  12   8   5   -6.40   24.40
  12   8   5   11.40   14.60
  12   8   5   -1.20    9.00
  12   8   5    9.30   18.70
 -12  -8  -5   -8.20   18.20
 -12  -8  -5    4.90   12.80
  13   8   5  348.27   57.69
  13   8   5  325.47   40.90
  13   8   5  307.97   46.30
 -13  -8  -5  328.27   32.90
 -13  -8  -5  282.27   44.80
   7  -9  -6   94.79   27.70
   7  -9  -6   55.59   20.60
   7  -9  -6   95.49   24.70
   6  -9  -6  113.89   24.60
   6  -9  -6  170.18   26.40
   6  -9  -6  145.89   29.10
   5  -9  -6   11.10   16.20
   5  -9  -6   10.00   19.50
   5  -9  -6  -10.10   16.80
   4  -9  -6  279.97   36.50
   4  -9  -6  266.87   31.10
   4  -9  -6  252.77   33.90
  -3   9   6  763.02   51.19
   3  -9  -6  878.11   57.19
   3  -9  -6  895.51   52.99
  -2   9   6  376.16   31.50
   2  -9  -6  283.67   29.20
   2  -9  -6  353.26   33.80
  -1   9   6  142.79   19.10
   1  -9  -6  164.18   22.00
   1  -9  -6  162.38   20.00
   1  -9  -6  127.99   18.60
   0   9   6  764.22   44.10
   0  -9  -6  650.73   40.10
   0  -9  -6  566.04   41.70
   0  -9  -6  654.33   42.50
  -1  -9  -6   31.10   10.30
  -1  -9  -6   56.69   10.10
  -1  -9  -6   66.09   11.90
   2   9   6  411.16   31.50
  -2  -9  -6  430.66   28.10
  -2  -9  -6  389.16   29.50
  -2  -9  -6  464.65   30.60
   3   9   6  351.96   29.00
  -3  -9  -6  357.66   24.70
  -3  -9  -6  361.86   26.20
  -3  -9  -6  358.56   26.80
   4   9   6  130.89   21.60
   4   9   6  147.99   13.70
  -4  -9  -6  125.19   17.20
  -4  -9  -6  175.88   14.80
  -4  -9  -6  123.99   13.40
  -4  -9  -6  147.99   17.30
  -4  -9  -6  143.69   15.20
  -4  -9  -6  132.69   19.00
   5   9   6   10.10    5.40
   5   9   6    7.10   12.60
   5   9   6   20.00   11.60
   5   9   6   12.40   11.10
  -5  -9  -6   21.50    8.10
  -5  -9  -6   12.80    8.00
  -5  -9  -6    4.90    6.80
  -5  -9  -6    3.20    8.30
  -5  -9  -6   17.40    8.30
  -5  -9  -6   14.00    8.40
   6   9   6   64.39   16.60
   6   9   6   35.20    7.80
   6   9   6   64.19   14.40
   6   9   6   61.59   14.30
   6   9   6   69.99   11.30
   6   9   6   33.30   13.60
  -6  -9  -6   60.29   13.00
  -6  -9  -6   41.60    9.20
  -6  -9  -6   63.69   11.50
  -6  -9  -6   56.89   10.20
  -6  -9  -6   76.09   12.30
  -6  -9  -6   63.59   11.50
   7   9   6  112.89   20.50
   7   9   6  104.49   14.80
   7   9   6   55.09   15.80
   7   9   6  105.69   14.10
   7   9   6   93.59   22.80
   7   9   6   74.09   14.60
  -7  -9  -6   96.99   14.30
  -7  -9  -6   96.79   14.10
  -7  -9  -6  115.79   15.90
  -7  -9  -6   81.19   12.80
  -7  -9  -6   76.19   15.40
  -7  -9  -6   85.49   17.30
   8   9   6  861.91   50.19
   8   9   6  887.71   52.29
   8   9   6  882.21   59.39
   8   9   6  870.61   57.59
   8   9   6  865.71   67.09
   8   9   6  879.21   52.19
  -8  -9  -6  886.21   50.89
  -8  -9  -6  883.81   54.99
  -8  -9  -6  872.71   58.19
  -8  -9  -6  851.41   50.29
  -8  -9  -6  873.41   49.99
  -8  -9  -6  844.02   51.59
   9   9   6 1024.80   71.19
   9   9   6 1093.39   62.69
   9   9   6 1150.58   69.89
   9   9   6 1120.29   64.89
   9   9   6 1179.58   82.79
   9   9   6 1125.09   62.59
  -9  -9  -6 1100.29   62.29
  -9  -9  -6 1160.58   62.89
  -9  -9  -6 1044.90   61.49
  -9  -9  -6 1117.69   67.89
  -9  -9  -6 1129.89   71.49
  -9  -9  -6 1111.09   63.79
  10   9   6  789.62   49.20
  10   9   6  807.02   60.39
  10   9   6  825.72   53.09
  10   9   6  823.12   71.19
  10   9   6  766.12   54.79
 -10  -9  -6  802.12   49.50
 -10  -9  -6  773.42   57.89
 -10  -9  -6  847.12   49.20
 -10  -9  -6  820.12   49.20
 -10  -9  -6  831.22   56.29
  11   9   6   36.70   12.10
  11   9   6   33.70   13.40
  11   9   6   29.30   24.80
  11   9   6   55.29   21.60
 -11  -9  -6    8.70   10.60
 -11  -9  -6   33.50   12.50
 -11  -9  -6   22.40   13.30
 -11  -9  -6   34.90   19.60
  12   9   6  131.79   29.10
  12   9   6  159.48   24.20
  12   9   6  157.88   39.00
  12   9   6  148.19   20.60
 -12  -9  -6  131.89   21.40
 -12  -9  -6  134.59   19.90
 -12  -9  -6  158.18   21.20
 -12  -9  -6  222.58   37.40
  13   9   6   38.70   33.70
  13   9   6   65.29   27.60
  13   9   6   74.79   19.70
 -13  -9  -6   18.30   21.80
 -13  -9  -6   45.70   17.50
 -13  -9  -6   53.59   15.90
   6 -10  -7  252.57   37.60
   6 -10  -7  174.88   29.70
   6 -10  -7  217.28   31.80
   5 -10  -7  505.55   44.40
   5 -10  -7  490.35   50.89
   4 -10  -7  165.18   27.80
   4 -10  -7  219.58   30.50
  -3  10   7   17.20   14.00
   3 -10  -7   32.50   18.00
   3 -10  -7   43.80   15.50
   3 -10  -7    2.30   15.90
  -2  10   7   62.59   16.00
   2 -10  -7   81.59   19.50
   2 -10  -7   68.09   16.20
   2 -10  -7   48.60   17.10
  -1  10   7   -4.30   12.30
   1 -10  -7    9.70   13.30
   1 -10  -7    6.10   11.80
   1 -10  -7   10.70   13.70
   0  10   7   -4.00   11.60
   0 -10  -7   -9.60    9.50
   0 -10  -7   -4.80   11.30
   0 -10  -7    1.50   10.90
   1  10   7   15.70   12.00
  -1 -10  -7    2.80    9.20
  -1 -10  -7   -2.10   10.80
  -1 -10  -7    4.40   10.40
   2  10   7  287.47   27.70
  -2 -10  -7  209.88   23.70
  -2 -10  -7  175.18   23.20
  -2 -10  -7  239.88   21.90
   3  10   7   64.49   14.00
  -3 -10  -7   41.50   11.30
  -3 -10  -7   45.70   10.40
  -3 -10  -7   51.09   11.50
   4  10   7   62.79    9.80
   4  10   7   42.50   13.70
  -4 -10  -7   64.29   12.40
  -4 -10  -7   64.19   12.70
  -4 -10  -7   67.69   13.20
  -4 -10  -7   66.89   14.60
   5  10   7  276.97   30.10
   5  10   7  303.07   20.70
  -5 -10  -7  276.97   27.10
  -5 -10  -7  280.37   24.60
  -5 -10  -7  269.07   21.00
  -5 -10  -7  227.98   21.80
  -5 -10  -7  254.47   23.30
   6  10   7   57.99   10.70
   6  10   7   30.60   14.60
   6  10   7   33.60   14.20
   6  10   7   29.20   15.70
   6  10   7   38.10    8.60
  -6 -10  -7   42.50   10.50
  -6 -10  -7   40.40   10.40
  -6 -10  -7   30.40    9.50
  -6 -10  -7   42.60   11.10
  -6 -10  -7   58.49   17.90
  -6 -10  -7   39.10   12.80
   7  10   7 1762.82   88.29
   7  10   7 1547.65   93.79
   7  10   7 1704.73  103.99
   7  10   7 1776.12   95.79
   7  10   7 1740.63   92.69
   7  10   7 1756.42   88.89
  -7 -10  -7 1692.23   88.69
  -7 -10  -7 1573.04   88.89
  -7 -10  -7 1713.53   91.09
  -7 -10  -7 1728.83   96.59
  -7 -10  -7 1685.03   88.19
  -7 -10  -7 1792.12   87.99
   8  10   7 1805.22   94.59
   8  10   7 1860.61   97.59
   8  10   7 1813.72  102.69
   8  10   7 1944.51  102.59
   8  10   7 1816.22   95.89
   8  10   7 1656.93  108.99
  -8 -10  -7 1781.02   94.49
  -8 -10  -7 1795.82   97.09
  -8 -10  -7 1910.11   97.89
  -8 -10  -7 1884.61   94.79
  -8 -10  -7 1768.52   94.69
  -8 -10  -7 1868.21  103.49
   9  10   7  139.49   23.10
   9  10   7  122.29   16.80
   9  10   7  129.99   18.90
   9  10   7  122.29   18.20
   9  10   7  180.48   28.60
   9  10   7  154.88   30.70
  -9 -10  -7  150.28   21.00
  -9 -10  -7  135.69   19.00
  -9 -10  -7  125.39   23.20
  -9 -10  -7  182.18   30.40
  -9 -10  -7  126.99   17.70
  -9 -10  -7  157.98   22.10
  10  10   7  158.28   35.30
  10  10   7  176.38   25.00
  10  10   7  179.08   20.70
  10  10   7  166.98   30.10
  10  10   7  149.99   24.70
 -10 -10  -7  161.18   22.60
 -10 -10  -7  125.39   25.00
 -10 -10  -7  126.79   23.60
 -10 -10  -7  157.48   20.10
 -10 -10  -7  160.18   21.40
  11  10   7  341.07   33.20
  11  10   7  331.87   42.40
  11  10   7  408.16   53.69
  11  10   7  334.87   28.70
 -11 -10  -7  305.07   39.00
 -11 -10  -7  316.67   30.80
 -11 -10  -7  290.87   28.60
 -11 -10  -7  305.87   29.80
  12  10   7  121.79   29.70
  12  10   7   64.89   19.60
  12  10   7  105.49   34.20
 -12 -10  -7   64.99   17.80
 -12 -10  -7   83.49   23.90
 -12 -10  -7   63.99   17.60
 -12 -10  -7   99.79   19.20
  13  10   7   26.20   29.60
  13  10   7   49.70   17.70
  13  10   7   63.19   26.40
 -13 -10  -7   30.90   15.60
 -13 -10  -7    3.70   15.90
 -13 -10  -7   30.80   22.60
   5 -11  -8   32.40   20.20
   5 -11  -8   -4.80   18.70
   5 -11  -8   37.00   24.30
   4 -11  -8   -3.80   16.90
   4 -11  -8   -4.60   20.10
   4 -11  -8  -14.80   17.80
  -3  11   8   -6.70   14.20
   3 -11  -8   -6.00   14.20
   3 -11  -8  -28.60   16.40
   3 -11  -8  -19.00   15.60
  -2  11   8   14.30   14.20
   2 -11  -8   37.40   15.10
   2 -11  -8    5.90   15.20
   2 -11  -8   33.80   17.50
  -1  11   8   -2.10   13.40
   1 -11  -8    8.40   13.00
   1 -11  -8   -1.80   14.40
   1 -11  -8  -12.60   13.50
   0  11   8   23.70   14.60
   0 -11  -8   36.50   15.80
   0 -11  -8   15.20   14.20
   0 -11  -8   51.19   15.10
   1  11   8   29.00   14.40
  -1 -11  -8    1.60   12.10
  -1 -11  -8   23.50   11.40
  -1 -11  -8   22.20   12.20
   2  11   8 1080.59   66.09
  -2 -11  -8 1238.48   63.39
  -2 -11  -8  953.40   63.69
  -2 -11  -8 1195.58   64.19
   3  11   8 1621.04   86.09
  -3 -11  -8 1575.14   81.19
  -3 -11  -8 1588.64   82.59
  -3 -11  -8 1367.46   82.69
   4  11   8  557.14   41.40
  -4 -11  -8  513.45   39.10
  -4 -11  -8  517.25   34.10
  -4 -11  -8  450.35   36.00
  -4 -11  -8  484.35   34.70
   5  11   8  155.68   15.70
   5  11   8   94.89   18.80
  -5 -11  -8  125.59   21.60
  -5 -11  -8   93.89   16.10
  -5 -11  -8  121.79   16.70
  -5 -11  -8  115.19   17.40
   6  11   8  884.31   49.00
   6  11   8  911.61   57.69
  -6 -11  -8  828.62   50.29
  -6 -11  -8  851.21   56.79
  -6 -11  -8  891.11   53.59
  -6 -11  -8  860.31   50.49
   7  11   8  927.11   60.39
   7  11   8  829.22   58.49
   7  11   8  898.91   50.49
   7  11   8  867.61   50.89
  -7 -11  -8  844.72   53.99
  -7 -11  -8  896.51   51.89
  -7 -11  -8  895.21   51.69
  -7 -11  -8  878.01   59.99
   8  11   8  480.05   43.00
   8  11   8  442.76   41.90
   8  11   8  355.66   28.60
   8  11   8  313.17   36.80
   8  11   8  398.36   31.30
  -8 -11  -8  372.76   30.70
  -8 -11  -8  386.06   39.70
  -8 -11  -8  403.86   31.50
  -8 -11  -8  375.46   32.30
  -8 -11  -8  363.56   30.60
   9  11   8  100.39   15.90
   9  11   8   51.69   11.10
   9  11   8   54.99   17.30
   9  11   8   79.99   19.80
   9  11   8  121.49   23.60
  -9 -11  -8   82.79   15.20
  -9 -11  -8   78.79   19.60
  -9 -11  -8   91.59   15.60
  -9 -11  -8   78.39   14.50
  -9 -11  -8   68.79   13.70
  10  11   8  158.28   21.00
  10  11   8  139.29   24.60
  10  11   8  127.69   26.90
  10  11   8  216.28   25.10
 -10 -11  -8  159.58   23.00
 -10 -11  -8  109.79   17.60
 -10 -11  -8  132.79   19.60
 -10 -11  -8  190.08   32.50
 -10 -11  -8  125.49   25.10
  11  11   8   49.60   25.90
  11  11   8   60.19   14.70
  11  11   8   91.29   30.80
  11  11   8   78.69   16.80
 -11 -11  -8   50.79   17.30
 -11 -11  -8   52.49   14.90
 -11 -11  -8   56.79   21.70
 -11 -11  -8   86.79   16.50
  12  11   8    2.10   22.00
  12  11   8   26.60   26.10
  12  11   8    6.80   13.60
 -12 -11  -8  -16.40   14.20
 -12 -11  -8    4.60   12.40
 -12 -11  -8   -3.70   19.20
  13  11   8   42.50   17.10
  13  11   8   53.39   32.10
  13  11   8   52.59   25.40
 -13 -11  -8   20.80   16.70
 -13 -11  -8   41.50   16.90
 -13 -11  -8   31.70   23.10
   4 -12  -9  -12.40   20.40
   4 -12  -9  -34.80   17.80
   4 -12  -9   -6.20   18.60
   3 -12  -9   75.29   20.50
   3 -12  -9   62.89   23.40
   3 -12  -9   27.30   20.20
  -2  12   9  203.08   30.50
   2 -12  -9  171.38   27.10
  -1  12   9  233.08   32.40
   1 -12  -9  238.98   34.80
   1 -12  -9  324.97   33.00
   0  12   9   18.80   16.30
   0 -12  -9   40.30   17.70
   0 -12  -9   13.60   14.70
   0 -12  -9   53.99   16.90
   1  12   9  430.66   40.10
  -1 -12  -9  525.55   37.90
  -1 -12  -9  482.65   38.90
   2  12   9  233.78   31.40
  -2 -12  -9  256.97   26.50
  -2 -12  -9  239.98   27.80
   3  12   9   21.90   15.20
  -3 -12  -9   13.60   10.90
  -3 -12  -9   -0.90   11.50
  -3 -12  -9   15.20   12.50
   4  12   9  146.99   22.80
  -4 -12  -9  187.88   21.40
  -4 -12  -9  156.18   24.10
  -4 -12  -9  193.98   26.40
  -4 -12  -9  166.78   22.50
   5  12   9   56.19   17.30
  -5 -12  -9   46.90   15.30
  -5 -12  -9   55.19   13.60
  -5 -12  -9   55.29   13.60
  -5 -12  -9   46.50   13.90
   6  12   9   -5.80   14.80
   6  12   9   -2.60    8.40
  -6 -12  -9    6.30   11.60
  -6 -12  -9    4.30   10.90
  -6 -12  -9   -6.30   12.80
  -6 -12  -9   -7.50   10.60
   7  12   9   15.50    8.20
   7  12   9   14.20   16.30
  -7 -12  -9   13.70   11.30
  -7 -12  -9   20.00   11.40
  -7 -12  -9    6.90   10.70
  -7 -12  -9    4.80   14.70
   8  12   9   56.99   12.90
   8  12   9   24.20   18.50
   8  12   9   34.20    9.90
   8  12   9   37.20   18.30
  -8 -12  -9   51.89   13.20
  -8 -12  -9   40.50   12.20
  -8 -12  -9   24.30   12.00
  -8 -12  -9   26.60   16.30
   9  12   9    1.90   17.10
   9  12   9   50.59   20.60
   9  12   9   33.50   13.10
   9  12   9   40.20   11.60
  -9 -12  -9   21.70   17.30
  -9 -12  -9   34.50   13.40
  -9 -12  -9   34.80   12.90
  -9 -12  -9   47.10   14.80
  10  12   9  114.19   16.60
  10  12   9  113.29   25.70
  10  12   9  122.19   18.50
 -10 -12  -9   93.99   23.90
 -10 -12  -9   98.89   18.10
 -10 -12  -9   98.69   18.00
  11  12   9  306.47   28.00
  11  12   9  338.77   32.50
 -11 -12  -9  239.18   29.40
 -11 -12  -9  288.67   31.00
  12  12   9   94.39   23.50
  12  12   9   98.39   31.20
 -12 -12  -9   57.79   16.60
 -12 -12  -9   70.69   19.90
   3 -13 -10   94.29   27.30
   3 -13 -10   91.59   23.80
  -2  13  10  -30.50   15.30
   2 -13 -10  -13.40   16.80
   2 -13 -10    8.70   17.20
   2 -13 -10    1.20   19.10
  -1  13  10  141.49   24.20
   1 -13 -10  118.59   25.40
   1 -13 -10  249.28   34.80
   0  13  10  291.47   37.40
   0 -13 -10  373.36   39.30
   0 -13 -10  455.55   38.60
   1  13  10   94.89   20.10
  -1 -13 -10   82.19   18.60
  -1 -13 -10   67.29   19.20
   2  13  10    7.10   16.20
  -2 -13 -10   24.50   13.40
  -2 -13 -10    7.10   13.70
  -2 -13 -10   -8.70   13.20
   3  13  10    5.90   15.90
  -3 -13 -10    2.20   13.20
  -3 -13 -10   19.30   13.90
  -3 -13 -10    6.60   13.40
  -3 -13 -10   18.00   13.40
   4  13  10   -4.60   15.20
  -4 -13 -10  -12.40   12.10
  -4 -13 -10   14.10   11.60
  -4 -13 -10    5.00   11.90
  -4 -13 -10    9.00   12.70
   5  13  10   29.40   17.50
  -5 -13 -10   10.40   12.60
  -5 -13 -10   29.10   15.00
  -5 -13 -10   31.10   12.10
  -5 -13 -10   12.80   13.20
   6  13  10  556.34   46.40
  -6 -13 -10  535.05   44.80
  -6 -13 -10  550.74   37.30
  -6 -13 -10  438.96   39.20
  -6 -13 -10  482.95   38.50
   7  13  10  729.03   43.10
   7  13  10  815.42   56.29
  -7 -13 -10  603.74   47.50
  -7 -13 -10  711.33   51.89
  -7 -13 -10  691.53   45.50
  -7 -13 -10  685.53   53.19
   8  13  10   33.20   20.00
   8  13  10   27.00    9.30
  -8 -13 -10   18.00   12.30
  -8 -13 -10   13.60   15.80
  -8 -13 -10   19.60   12.40
   9  13  10   73.79   24.00
   9  13  10  145.49   19.70
   9  13  10  110.39   25.90
  -9 -13 -10  113.59   19.40
  -9 -13 -10  105.89   25.50
  -9 -13 -10  100.39   18.90
  10  13  10   69.19   25.40
  10  13  10  104.19   16.90
 -10 -13 -10   98.59   19.40
 -10 -13 -10   76.89   25.40
  11  13  10   29.60   35.60
 -11 -13 -10   29.60   29.90
 -11 -13 -10   26.40   17.10
  -1  14  11  -21.60   16.50
   1 -14 -11   -9.20   16.30
   0  14  11  -22.40   16.30
   0 -14 -11   21.60   17.90
   1  14  11   28.60   18.00
  -1 -14 -11   43.70   18.20
   2  14  11   85.49   21.40
  -2 -14 -11  105.99   21.30
   3  14  11    8.30   17.60
  -3 -14 -11   -4.60   13.50
  -3 -14 -11    6.50   12.20
  -3 -14 -11   11.90   13.30
   4  14  11   43.80   20.00
  -4 -14 -11   61.69   18.90
  -4 -14 -11   69.99   17.10
  -4 -14 -11   45.80   16.80
   5  14  11   72.09   21.00
  -5 -14 -11   60.99   18.50
  -5 -14 -11   70.39   15.40
  -5 -14 -11   30.40   14.40
   6  14  11   10.40   18.40
  -6 -14 -11    2.60   11.50
  -6 -14 -11   20.60   15.60
  -6 -14 -11    7.70   13.60
   7  14  11  415.56   44.90
  -7 -14 -11  454.65   43.20
  -7 -14 -11  333.37   36.20
  -7 -14 -11  395.36   33.30
   8  14  11  387.46   29.60
   8  14  11  408.36   47.40
  -8 -14 -11  395.26   43.30
  -8 -14 -11  314.97   35.30
  -8 -14 -11  386.46   34.50
   9  14  11   63.79   13.70
   9  14  11   70.99   25.10
  -9 -14 -11   40.60   16.20
  -9 -14 -11   36.60   21.20
  -9 -14 -11   51.89   16.10
  10  14  11   82.49   16.30
  10  14  11   84.19   26.90
 -10 -14 -11   72.09   18.40
 -10 -14 -11   61.89   24.00
   1  15  12   15.10   18.40
  -1 -15 -12   -3.50   17.10
  -1 -15 -12   13.70   12.20
  -1 -15 -12  -15.70   15.50
   2  15  12   32.10   20.40
  -2 -15 -12   -4.00   16.80
  -2 -15 -12   53.69   17.20
  -2 -15 -12   68.49   21.10
   3  15  12  252.57   38.30
  -3 -15 -12  244.08   31.10
  -3 -15 -12  223.48   33.40
   4  15  12  141.09   25.70
  -4 -15 -12   80.59   17.70
  -4 -15 -12   29.30   17.10
  -4 -15 -12   75.09   20.40
   5  15  12  -16.00   18.80
  -5 -15 -12    7.20   14.40
  -5 -15 -12   25.00   17.10
  -5 -15 -12  -17.70   13.30
   6  15  12  101.69   25.50
  -6 -15 -12  137.89   28.00
  -6 -15 -12   89.99   18.10
  -6 -15 -12   53.79   19.50
   7  15  12  -10.10   20.20
  -7 -15 -12    2.30   17.80
  -7 -15 -12    0.70   12.40
  -7 -15 -12  -18.10   13.50
   8  15  12  -20.40   21.20
  -8 -15 -12    3.50   13.60
  -8 -15 -12  -10.10   16.40
  -8 -15 -12   -6.40   14.20
   9  15  12  -21.90   21.00
  -9 -15 -12  -16.70   12.50
  -9 -15 -12   -2.50   14.20
  -9 -15 -12  -17.30   17.50
   5  16  13   54.99   24.60
  -5 -16 -13   75.09   18.90
  -5 -16 -13   17.70   18.20
   6  16  13   64.09   25.80
  -7 -13 -17   52.49   15.70
   7  13  17   50.29   17.80
   7  13  17   21.70   19.20
  -6 -13 -17   -2.90   12.40
   6  13  17    5.10   15.20
   6  13  17  -16.80   18.20
  -5 -13 -17   23.70   13.50
   5  13  17   26.90   16.80
   5  13  17    4.30   20.30
  -4 -13 -17   -5.00   11.30
   4  13  17    0.20   14.50
  -3 -13 -17    3.50   13.60
  -3 -13 -17  -16.80   11.80
   3  13  17    1.00   15.20
  -2 -13 -17    9.20   14.20
  -2 -13 -17   29.70   15.00
   2  13  17   26.70   16.60
  -1 -13 -17  132.89   22.50
  -1 -13 -17  105.69   22.00
   1  13  17  116.29   22.10
   0 -13 -17   -9.90   15.80
   0 -13 -17  -22.40   13.80
   0  13  17  -16.40   15.60
  -9 -12 -16  283.17   35.00
   9  12  16  204.88   28.40
  -8 -12 -16   50.59   16.20
   8  12  16   28.50   17.50
   8  12  16   59.29   16.90
  -7 -12 -16   27.30   12.60
   7  12  16   14.50   15.80
   7  12  16   25.10   15.20
  -6 -12 -16   24.90   12.20
   6  12  16   13.60   16.20
   6  12  16   14.60   14.20
  -5 -12 -16   -1.90   10.40
   5  12  16   -1.20   12.40
   5  12  16  -19.80   15.30
  -4 -12 -16   63.19   16.20
  -4 -12 -16  107.89   17.30
   4  12  16   54.19   16.80
   4  12  16   47.20   21.80
  -3 -12 -16  333.17   31.60
  -3 -12 -16  301.27   33.00
   3  12  16  313.07   34.80
  -2 -12 -16  197.68   29.00
  -2 -12 -16  249.88   28.40
   2  12  16  248.48   32.20
  -1 -12 -16   16.00   13.90
  -1 -12 -16   14.40   13.90
   1  12  16   16.50   14.70
   0 -12 -16  164.38   23.80
   0 -12 -16  147.79   22.80
   0  12  16  141.29   22.60
   1 -12 -16   -0.70   16.30
   1 -12 -16    0.20   13.60
  -1  12  16    3.00   15.50
   2 -12 -16  377.26   40.80
   2 -12 -16  266.47   36.30
  -2  12  16  365.06   39.50
 -10 -11 -15    2.80   12.10
 -10 -11 -15   28.80   13.40
  10  11  15  -11.70   12.50
  10  11  15   36.50   23.90
  -9 -11 -15   52.79   14.40
  -9 -11 -15   43.70   15.50
   9  11  15   23.90   15.30
   9  11  15   63.19   27.10
  -8 -11 -15  166.88   26.10
   8  11  15  119.99   19.40
   8  11  15  134.49   21.20
  -7 -11 -15  191.88   26.00
   7  11  15  151.18   26.20
   7  11  15  132.69   21.60
  -6 -11 -15   11.60   10.10
   6  11  15    5.90   13.70
   6  11  15    6.90   11.40
  -5 -11 -15  311.27   30.90
   5  11  15  320.67   34.20
   5  11  15  272.77   30.70
  -4 -11 -15  422.16   35.70
  -4 -11 -15  392.56   31.40
   4  11  15  406.76   36.00
   4  11  15  399.96   39.20
  -3 -11 -15   98.69   17.10
  -3 -11 -15  105.59   16.90
   3  11  15   56.49   19.40
   3  11  15   93.59   17.70
  -2 -11 -15  528.85   38.00
  -2 -11 -15  471.15   39.30
   2  11  15  525.75   41.50
  -1 -11 -15  324.57   30.40
  -1 -11 -15  307.57   31.50
   1  11  15  315.87   33.40
   0 -11 -15  -12.60   10.40
   0 -11 -15  -13.20   11.80
   0  11  15  -14.60   11.20
   1 -11 -15   16.80   15.30
   1 -11 -15   33.00   13.80
  -1  11  15   17.80   15.10
   2 -11 -15   -2.80   15.10
   2 -11 -15  -12.90   13.80
  -2  11  15   -3.50   13.60
   3 -11 -15   17.40   18.50
   3 -11 -15  -16.40   15.50
  -3  11  15   26.90   16.70
   4 -11 -15  -31.10   17.80
   4 -11 -15   29.70   20.50
  -4  11  15   29.70   17.30
 -11 -10 -14   91.89   20.20
  11  10  14  103.59   31.30
  11  10  14   58.99   17.10
 -10 -10 -14  276.07   35.80
 -10 -10 -14  329.77   30.70
  10  10  14  276.97   32.20
  10  10  14  382.06   51.49
  -9 -10 -14  476.05   35.90
  -9 -10 -14  434.36   41.90
   9  10  14  436.56   38.00
   9  10  14  538.85   57.59
  -8 -10 -14   56.59   15.70
   8  10  14   76.09   24.20
   8  10  14   47.40   17.60
   8  10  14   47.40   13.80
  -7 -10 -14  283.67   29.50
   7  10  14  304.37   39.20
   7  10  14  233.18   28.30
   7  10  14  233.78   27.10
  -6 -10 -14  396.26   34.80
   6  10  14  395.66   34.90
   6  10  14  414.36   42.30
   6  10  14  396.86   33.20
  -5 -10 -14   47.20   14.20
  -5 -10 -14   27.30   10.10
   5  10  14   37.70   15.30
   5  10  14   32.70   13.00
   5  10  14   35.10   11.70
  -4 -10 -14   68.69   13.30
  -4 -10 -14   73.89   12.60
   4  10  14   61.29   14.30
   4  10  14   54.49   14.70
  -3 -10 -14   57.79   12.50
  -3 -10 -14   67.59   13.90
   3  10  14   53.19   16.60
   3  10  14   38.80   13.50
  -2 -10 -14   28.70   12.30
  -2 -10 -14   29.20   11.50
   2  10  14   19.00   15.80
   2  10  14   20.60   12.40
  -1 -10 -14   84.89   15.70
  -1 -10 -14   67.69   15.50
   1  10  14   79.19   16.40
   0 -10 -14   18.00   11.20
   0 -10 -14   17.20   12.90
   0  10  14   21.40   12.80
   1 -10 -14   25.80   13.00
   1 -10 -14   25.20   13.70
  -1  10  14   22.20   13.10
   2 -10 -14  215.08   29.00
   2 -10 -14  166.38   26.90
  -2  10  14  194.48   28.50
   3 -10 -14  712.03   52.39
   3 -10 -14  869.01   55.79
  -3  10  14  775.62   53.89
   4 -10 -14   76.19   19.90
   4 -10 -14  129.79   23.20
  -4  10  14  101.19   19.40
   5 -10 -14   -2.90   18.30
  -5  10  14    9.10   15.90
 -11  -9 -13  278.07   27.80
 -11  -9 -13  301.67   33.00
 -11  -9 -13  275.07   35.60
  11   9  13  347.67   54.39
  11   9  13  306.57   39.70
  11   9  13  237.28   29.90
 -10  -9 -13  268.67   28.10
 -10  -9 -13  233.08   31.70
 -10  -9 -13  238.08   24.70
  10   9  13  288.67   47.70
  10   9  13  219.98   27.20
  10   9  13  167.78   29.00
  -9  -9 -13   20.50   12.00
  -9  -9 -13   15.40   11.60
   9   9  13   -1.70   10.00
   9   9  13    4.30   18.20
  -8  -9 -13   97.69   18.70
   8   9  13   83.29   16.10
   8   9  13  104.29   26.70
  -7  -9 -13    0.50    8.00
   7   9  13  -10.60    8.50
   7   9  13   -7.50    8.50
   7   9  13   12.00   15.40
  -6  -9 -13  297.87   28.50
   6   9  13  269.07   27.70
   6   9  13  284.57   35.80
   6   9  13  275.67   26.50
  -5  -9 -13  236.68   20.10
  -5  -9 -13  205.78   24.50
   5   9  13  232.38   30.90
   5   9  13  204.28   26.20
   5   9  13  229.88   24.50
  -4  -9 -13  276.87   26.90
  -4  -9 -13  266.27   22.10
   4   9  13  278.27   31.00
   4   9  13  278.37   28.60
   4   9  13  274.07   26.80
  -3  -9 -13   87.39   13.30
  -3  -9 -13   78.19   14.30
   3   9  13   65.49   15.80
   3   9  13   94.69   18.10
   3   9  13   73.29   14.00
  -2  -9 -13 1019.90   56.09
  -2  -9 -13 1017.00   59.79
   2   9  13  981.50   59.49
   2   9  13 1034.00   61.69
   2   9  13  921.61   60.89
  -1  -9 -13  543.55   37.30
  -1  -9 -13  541.75   38.70
   1   9  13  587.24   44.70
   1   9  13  541.85   39.70
   0  -9 -13    9.60   10.90
   0  -9 -13   13.30    9.40
   0   9  13   -0.10   10.20
   1  -9 -13  788.22   49.80
   1  -9 -13  798.72   49.60
  -1   9  13  747.13   50.69
   2  -9 -13 1108.79   63.69
   2  -9 -13 1051.29   63.09
  -2   9  13 1021.60   63.79
   3  -9 -13   93.99   18.30
   3  -9 -13  109.79   20.70
  -3   9  13   86.39   17.90
   4  -9 -13    3.20   14.90
   4  -9 -13   29.20   16.70
  -4   9  13   23.90   13.70
   5  -9 -13  -24.60   15.30
   5  -9 -13  -23.70   15.50
  -5   9  13   -7.40   12.60
   6  -9 -13  -16.10   18.10
 -11  -8 -12   24.90   16.60
  11   8  12   20.80   23.00
  11   8  12   -1.30   11.00
  11   8  12   28.20   18.10
 -10  -8 -12   40.10   14.30
 -10  -8 -12   66.09   16.40
  10   8  12   47.90   19.40
  10   8  12   35.40   12.90
  10   8  12   50.89   24.00
  -9  -8 -12   47.00   13.90
  -9  -8 -12   42.30   13.80
   9   8  12   13.90   14.40
   9   8  12   33.00   21.30
   9   8  12   34.10   12.20
  -8  -8 -12   94.19   18.10
   8   8  12   93.59   26.20
   8   8  12   87.49   19.40
   8   8  12   84.09   14.50
  -7  -8 -12   20.30   10.50
   7   8  12   20.60    9.90
   7   8  12   14.30    9.50
   7   8  12   32.80   19.10
   7   8  12   27.40   12.50
  -6  -8 -12  264.07   26.60
   6   8  12  248.78   24.30
   6   8  12  244.08   23.90
   6   8  12  244.28   33.50
   6   8  12  221.08   26.50
  -5  -8 -12   91.39   11.40
  -5  -8 -12   70.69   14.40
   5   8  12   83.09   19.30
   5   8  12   80.39   13.00
   5   8  12   84.39   13.60
  -4  -8 -12  278.07   20.90
  -4  -8 -12  240.38   24.60
   4   8  12  268.27   26.20
   4   8  12  272.47   24.70
   4   8  12  277.27   30.00
  -3  -8 -12  880.41   54.59
  -3  -8 -12  897.81   49.50
   3   8  12  906.41   53.89
   3   8  12  911.81   53.59
   3   8  12  949.90   58.69
  -2  -8 -12  111.49   15.90
  -2  -8 -12  115.79   17.20
   2   8  12  127.89   19.10
   2   8  12  141.79   22.40
  -1  -8 -12  261.87   23.70
  -1  -8 -12  240.28   22.50
   1   8  12  258.27   25.20
   1   8  12  268.17   28.80
   1   8  12  259.07   24.90
   0  -8 -12 1015.50   55.99
   0  -8 -12 1026.10   57.89
   0   8  12 1016.60   58.69
   0   8  12  918.81   58.09
   1  -8 -12  120.79   16.90
   1  -8 -12  150.08   20.00
  -1   8  12  101.29   16.90
  -1   8  12  123.79   21.60
   2  -8 -12   41.40   13.40
   2  -8 -12   35.60   11.70
  -2   8  12   33.50   13.60
  -2   8  12   45.20   13.40
   3  -8 -12  247.68   28.10
   3  -8 -12  219.08   27.00
  -3   8  12  232.58   27.70
   4  -8 -12  149.88   22.50
   4  -8 -12  166.18   21.90
  -4   8  12  173.18   25.80
   5  -8 -12    8.10   14.90
   5  -8 -12  -10.90   14.00
  -5   8  12    9.60   12.20
   6  -8 -12   10.80   18.20
   6  -8 -12    6.90   16.80
  -6   8  12   27.60   14.40
   7  -8 -12    2.70   19.40
   7  -8 -12  -37.20   18.10
 -12  -7 -11   57.09   22.00
  12   7  11    3.10   12.80
  12   7  11   40.90   30.10
  12   7  11   26.40   20.30
 -11  -7 -11   28.00   17.00
  11   7  11   -2.90   11.40
  11   7  11   12.10   22.80
  11   7  11   26.70   17.70
 -10  -7 -11   13.20   14.40
  10   7  11    3.80   16.60
  10   7  11  -11.00   10.00
  10   7  11   31.90   22.50
  -9  -7 -11    3.80   12.30
   9   7  11   -0.80   19.60
   9   7  11   -8.80    9.90
   9   7  11   -1.70   15.20
   8   7  11  340.57   28.20
   8   7  11  323.77   34.50
   8   7  11  335.87   44.70
  -7  -7 -11  143.29   21.30
   7   7  11  132.19   18.60
   7   7  11  141.29   21.30
   7   7  11  168.88   19.60
   7   7  11  142.79   27.70
  -6  -7 -11  565.44   40.60
   6   7  11  511.95   35.30
   6   7  11  544.95   36.20
   6   7  11  595.64   48.40
   6   7  11  597.14   40.00
  -5  -7 -11 2251.57  118.09
  -5  -7 -11 2242.28  109.09
   5   7  11 2168.38  114.59
   5   7  11 2191.58  113.09
   5   7  11 2176.48  112.39
   5   7  11 2375.36  124.79
  -4  -7 -11 1775.52   86.89
  -4  -7 -11 1715.53   94.09
   4   7  11 1726.33   90.19
   4   7  11 1737.73   90.49
   4   7  11 1772.12   98.49
  -3  -7 -11   99.99   12.10
  -3  -7 -11  102.09   15.00
   3   7  11  111.29   17.70
   3   7  11   72.59   14.40
   3   7  11  103.79   16.00
  -2  -7 -11  265.77   20.30
  -2  -7 -11  279.37   23.00
   2   7  11  277.97   23.90
   2   7  11  268.07   23.40
   2   7  11  281.87   25.10
  -1  -7 -11  154.98   16.70
  -1  -7 -11  167.18   18.10
   1   7  11  167.78   19.20
   1   7  11  205.78   22.70
   1   7  11  166.68   19.00
   0  -7 -11    0.30    7.00
   0  -7 -11    3.80    6.20
   0   7  11    9.30    7.10
   0   7  11    4.80    7.20
   0   7  11   11.40   11.10
   1  -7 -11   11.30    7.40
   1  -7 -11    6.70    8.50
  -1   7  11   13.50    8.00
  -1   7  11    0.20    7.80
   2  -7 -11  282.17   26.20
   2  -7 -11  292.47   25.20
  -2   7  11  282.77   25.30
  -2   7  11  283.47   27.00
   3  -7 -11  290.47   26.50
   3  -7 -11  303.37   28.20
   3  -7 -11  259.17   26.70
  -3   7  11  221.48   24.80
  -3   7  11  287.37   28.40
   4  -7 -11  125.69   18.50
   4  -7 -11  152.48   21.80
   4  -7 -11  117.29   19.40
  -4   7  11  132.79   20.10
  -4   7  11  113.59   18.20
   5  -7 -11   51.39   16.80
   5  -7 -11   28.50   15.10
   5  -7 -11   44.10   16.60
  -5   7  11   43.40   15.20
  -5   7  11   31.50   13.70
   6  -7 -11   34.60   16.90
   6  -7 -11   38.40   16.80
   6  -7 -11   37.30   17.30
  -6   7  11   43.40   13.90
   7  -7 -11  392.06   42.90
   7  -7 -11  356.36   40.10
   7  -7 -11  412.06   42.10
   8  -7 -11  553.64   55.19
   8  -7 -11  640.04   53.79
 -12  -6 -10   29.50   22.20
  12   6  10   18.10   21.70
  12   6  10   11.70   12.20
  12   6  10   69.89   33.70
 -11  -6 -10   75.49   22.00
  11   6  10   76.29   32.00
  11   6  10   32.70   13.20
  11   6  10   56.59   22.10
 -10  -6 -10  831.02   56.09
  10   6  10  825.32   75.59
  10   6  10  779.92   61.89
  10   6  10  821.42   50.89
  10   6  10  874.41   71.89
  -9  -6 -10 1125.19   63.89
   9   6  10 1113.29   61.79
   9   6  10 1040.10   71.79
   9   6  10 1076.69   65.69
   9   6  10  943.71   80.69
  -8  -6 -10  358.76   30.60
   8   6  10  276.97   43.50
   8   6  10  337.97   29.20
   8   6  10  384.96   29.10
   8   6  10  344.17   36.00
   7   6  10  304.77   24.10
   7   6  10  328.87   31.10
   7   6  10  296.67   25.10
   7   6  10  310.67   25.20
   7   6  10  360.66   39.90
   6   6  10  343.37   26.50
   6   6  10  413.06   28.10
   6   6  10  418.66   32.40
   6   6  10  449.46   40.40
  -5  -6 -10  339.87   28.00
   5   6  10  369.66   25.20
   5   6  10  328.77   27.50
   5   6  10  324.67   24.20
   5   6  10  352.86   34.20
  -4  -6 -10  179.28   18.70
  -4  -6 -10  167.68   13.20
   4   6  10  183.48   22.80
   4   6  10  181.08   17.40
   4   6  10  159.18   17.40
   4   6  10  162.88   16.80
  -3  -6 -10   28.00    6.20
  -3  -6 -10   29.80    8.30
   3   6  10   27.30    8.00
   3   6  10   31.80    7.80
   3   6  10   42.20   12.00
  -2  -6 -10  102.69   11.60
  -2  -6 -10   99.09   13.50
   2   6  10   95.29   14.70
   2   6  10   89.49   14.80
   2   6  10  114.79   14.60
  -1  -6 -10  290.97   22.60
  -1  -6 -10  308.37   20.80
   1   6  10  279.67   22.90
   1   6  10  314.77   24.40
   1   6  10  304.47   23.40
   0  -6 -10    4.40    5.00
   0  -6 -10    6.90    6.30
   0   6  10    3.10    8.00
   0   6  10    5.70    6.40
   0   6  10    3.50    6.30
   1  -6 -10   37.00    8.20
   1  -6 -10   23.40    8.50
  -1   6  10   30.30    9.10
  -1   6  10   21.40    7.80
   2  -6 -10  763.22   46.20
   2  -6 -10  807.52   45.80
  -2   6  10  789.52   47.40
   3  -6 -10 1695.03   83.89
   3  -6 -10 1613.74   84.89
   3  -6 -10 1564.34   84.29
  -3   6  10 1515.75   84.79
  -3   6  10 1580.64   85.19
   4  -6 -10  478.55   33.50
   4  -6 -10  434.86   34.80
   4  -6 -10  480.05   35.30
  -4   6  10  375.16   33.10
  -4   6  10  478.75   34.70
   5  -6 -10  111.99   20.10
   5  -6 -10   99.09   17.20
   5  -6 -10  104.99   19.60
  -5   6  10   97.89   18.30
  -5   6  10   90.49   16.30
   6  -6 -10 1248.88   73.69
   6  -6 -10 1262.87   75.39
   6  -6 -10 1187.08   70.49
  -6   6  10 1279.17   72.89
  -6   6  10 1097.49   68.99
   7  -6 -10  969.00   63.19
   7  -6 -10  887.91   60.19
   7  -6 -10  978.50   65.19
  -7   6  10  890.71   61.69
   8  -6 -10   54.59   22.70
   8  -6 -10   57.49   21.70
  -8   6  10   -7.30   28.60
   9  -6 -10   -7.30   18.60
   9  -6 -10  -15.30   18.70
 -12  -5  -9  291.77   42.30
  12   5   9  257.17   37.20
  12   5   9  331.17   59.99
  12   5   9  212.08   36.40
  12   5   9  245.08   27.40
 -11  -5  -9  382.36   42.20
  11   5   9  371.06   45.50
  11   5   9  381.96   40.50
  11   5   9  423.56   61.09
  11   5   9  337.07   30.60
 -10  -5  -9   79.59   19.50
  10   5   9   51.89   16.30
  10   5   9   59.49   25.40
  10   5   9   53.39   21.10
  -9  -5  -9  216.28   28.10
   9   5   9  171.78   24.30
   9   5   9  216.68   22.60
   9   5   9  209.28   32.60
   9   5   9  269.07   45.10
  -8  -5  -9  341.57   30.30
   8   5   9  338.87   26.80
   8   5   9  328.17   30.60
   8   5   9  301.57   35.00
   8   5   9  316.07   44.30
   7   5   9   84.29   17.20
   7   5   9   72.99   11.70
   7   5   9   83.49   13.70
   7   5   9   62.99   19.10
   6   5   9    2.30    8.80
   6   5   9    5.80    6.40
   6   5   9    4.10   11.90
   6   5   9    3.30    5.10
   5   5   9    3.60    9.50
   5   5   9   21.30    6.40
   5   5   9    7.80    5.40
   5   5   9   12.40    8.30
   4   5   9   28.20    6.90
   4   5   9   29.90    8.40
   4   5   9   29.70    7.10
   4   5   9   30.80   11.70
  -3  -5  -9  104.69   13.20
  -3  -5  -9   84.99    9.10
   3   5   9   81.69   11.60
   3   5   9   87.79   12.10
   3   5   9   83.39   12.20
   3   5   9   94.79   16.20
  -2  -5  -9  504.65   28.70
  -2  -5  -9  554.24   34.10
   2   5   9  567.14   35.80
   2   5   9  507.35   31.90
   2   5   9  514.25   31.40
  -1  -5  -9  520.05   30.80
  -1  -5  -9  564.34   34.50
   1   5   9  552.84   33.90
   1   5   9  597.24   36.30
   1   5   9  565.54   33.40
   0  -5  -9   21.50    5.90
   0  -5  -9   23.70    6.40
   0   5   9   21.30    7.00
   0   5   9   14.50    7.00
   0   5   9   18.70    7.20
   1  -5  -9 2057.29  102.59
   1  -5  -9 1929.31  101.29
  -1   5   9 2108.49  103.39
  -1   5   9 1983.00  103.39
  -1   5   9 2131.39  104.69
   2  -5  -9 1179.48   60.79
   2  -5  -9 1118.69   60.99
  -2   5   9 1120.29   61.99
  -2   5   9 1138.69   62.59
   3  -5  -9    5.80    6.40
   3  -5  -9   -2.70    7.60
   3  -5  -9   -7.40    8.20
  -3   5   9   12.60    8.50
  -3   5   9    3.00    7.60
   4  -5  -9 1352.66   73.39
   4  -5  -9 1361.66   70.89
   4  -5  -9 1316.77   73.89
  -4   5   9 1283.27   72.69
  -4   5   9 1357.46   73.29
   5  -5  -9  740.63   50.29
   5  -5  -9  777.32   49.10
   5  -5  -9  780.92   47.20
  -5   5   9  735.93   47.30
  -5   5   9  765.52   49.40
   6  -5  -9   87.99   17.50
   6  -5  -9   80.99   18.60
   6  -5  -9   86.19   18.60
  -6   5   9  101.79   20.20
  -6   5   9   77.09   15.80
   7  -5  -9   36.70   17.70
   7  -5  -9   33.80   17.90
   7  -5  -9   16.90   16.20
  -7   5   9   27.20   18.50
  -7   5   9   23.80   12.40
   8  -5  -9   32.70   18.40
   8  -5  -9   25.10   17.30
  -8   5   9  -11.40   18.50
   9  -5  -9   32.40   21.20
   9  -5  -9   13.30   19.40
  10  -5  -9   -8.00   18.80
  10  -5  -9   21.60   20.70
 -12  -4  -8  385.66   46.10
  12   4   8  310.97   47.20
  12   4   8  340.77   41.80
  12   4   8  229.08   51.29
  12   4   8  240.68   27.40
 -11  -4  -8  251.97   38.40
  11   4   8  142.59   30.20
  11   4   8  238.78   34.80
  11   4   8  174.28   22.40
  11   4   8  162.98   40.20
 -10  -4  -8  111.19   22.50
  10   4   8   94.59   14.80
  10   4   8   60.69   19.00
  10   4   8  122.39   35.70
  10   4   8  129.59   27.30
  -9  -4  -8  249.97   30.00
   9   4   8  247.18   23.10
   9   4   8  161.48   25.00
   9   4   8  265.07   34.50
   9   4   8  252.57   42.90
  -8  -4  -8  202.98   25.20
   8   4   8  217.48   30.10
   8   4   8  199.78   21.30
   8   4   8  185.18   26.00
   8   4   8  193.98   35.40
   7   4   8  104.29   16.10
   7   4   8  112.59   20.00
   7   4   8  105.09   15.80
   7   4   8  109.79   25.00
   6   4   8  161.28   26.10
   6   4   8  171.58   16.90
   6   4   8  163.78   21.40
   6   4   8  163.68   19.30
   5   4   8  128.99   21.90
   5   4   8  124.19   18.00
   5   4   8  142.49   15.50
   5   4   8  129.09   12.40
   5   4   8  140.89   14.30
   4   4   8  838.22   45.00
   4   4   8  780.92   43.60
   4   4   8  867.81   54.09
   4   4   8  828.02   47.80
   3   4   8 3060.79  146.89
   3   4   8 3005.80  146.69
   3   4   8 3205.38  155.28
   3   4   8 2859.01  147.99
  -2  -4  -8   93.29   11.40
  -2  -4  -8   69.19    7.70
   2   4   8   82.09   13.10
   2   4   8   86.09   10.60
   2   4   8   80.29   11.20
  -1  -4  -8 1853.81   95.59
  -1  -4  -8 1956.80   99.89
   1   4   8 1986.90   98.59
   1   4   8 1957.80   97.39
   1   4   8 2126.79  101.89
   0  -4  -8 6850.21  328.87
   0  -4  -8 6262.07  325.77
   0   4   8 6919.41  328.77
   0   4   8 7756.62  331.77
   0   4   8 6746.93  327.07
   1  -4  -8 1789.82   92.49
   1  -4  -8 1813.12   93.39
  -1   4   8 1886.81   93.59
  -1   4   8 1878.71   94.69
  -1   4   8 1994.70   96.09
   2  -4  -8  328.27   22.80
   2  -4  -8  322.67   21.50
  -2   4   8  332.47   23.70
  -2   4   8  316.87   23.60
   3  -4  -8   87.79   12.00
   3  -4  -8   84.89   12.30
   3  -4  -8  102.49   13.10
  -3   4   8   90.39   13.40
  -3   4   8   85.19   14.30
   4  -4  -8  162.98   17.00
   4  -4  -8  135.89   19.30
   4  -4  -8  168.88   19.50
  -4   4   8  164.68   20.10
  -4   4   8  152.78   18.60
   5  -4  -8    4.30    9.80
   5  -4  -8    3.00    9.70
   5  -4  -8    2.80    9.60
  -5   4   8    0.10    7.70
  -5   4   8   -1.00   11.30
  -5   4   8    6.10    8.30
   6  -4  -8  521.15   38.80
   6  -4  -8  561.44   42.30
   6  -4  -8  599.74   41.80
   6  -4  -8  592.44   40.70
  -6   4   8  495.45   34.20
  -6   4   8  520.35   37.20
  -6   4   8  569.54   42.70
   7  -4  -8  830.02   51.79
   7  -4  -8  819.82   53.89
   7  -4  -8  804.22   53.99
   7  -4  -8  753.32   56.49
  -7   4   8  767.12   55.19
  -7   4   8  729.43   48.80
   8  -4  -8  -10.20   20.70
   8  -4  -8    9.40   15.70
   8  -4  -8   -2.00   15.70
  -8   4   8  -22.70   18.20
   9  -4  -8   60.19   19.50
   9  -4  -8   50.29   20.10
  -9   4   8   -7.30   21.50
  10  -4  -8   18.20   19.80
  10  -4  -8   32.90   20.80
  11  -4  -8   42.50   26.30
  11  -4  -8   34.00   22.80
 -12  -3  -7   13.70   26.00
  12   3   7   -6.00   18.20
  12   3   7   26.60   30.20
  12   3   7    2.20    8.60
  12   3   7    2.90   25.10
 -11  -3  -7  115.19   27.90
  11   3   7   92.99   27.90
  11   3   7  114.69   24.40
  11   3   7  117.79   39.80
  11   3   7   74.59   13.70
 -10  -3  -7   10.00   19.20
  10   3   7   25.80   25.10
  10   3   7    8.50   15.30
  10   3   7    4.30    7.00
  10   3   7   15.30   17.90
  -9  -3  -7  201.88   30.30
   9   3   7  259.07   44.60
   9   3   7  186.38   20.20
   9   3   7  197.58   29.70
   9   3   7  175.28   25.60
  -8  -3  -7  429.66   35.50
   8   3   7  409.56   29.70
   8   3   7  442.76   39.80
   8   3   7  398.96   47.60
   8   3   7  448.96   37.00
  -7  -3  -7  197.98   22.30
   7   3   7  176.88   24.70
   7   3   7  184.18   23.40
   6   3   7  297.77   27.90
   6   3   7  316.77   33.90
   6   3   7  304.77   22.30
   6   3   7  322.47   26.10
   5   3   7 2127.79  110.99
   5   3   7 2235.68  106.39
   5   3   7 1965.00  116.49
   5   3   7 2209.38  108.19
   4   3   7 1169.58   57.79
   4   3   7 1050.59   62.39
   4   3   7 1219.78   59.89
   3   3   7  286.07   26.20
   3   3   7  306.07   22.90
   3   3   7  353.06   21.00
   3   3   7  357.36   20.60
   2   3   7  433.36   24.80
   2   3   7  413.16   24.30
   2   3   7  428.66   29.40
   2   3   7  385.16   25.00
  -1  -3  -7  274.17   19.40
  -1  -3  -7  250.27   15.60
   1   3   7  267.77   17.50
   1   3   7  273.07   18.80
   1   3   7  265.17   17.30
   1   3   7  299.67   21.20
   0  -3  -7   37.80    7.10
   0  -3  -7   31.50    5.40
   0   3   7   32.00    5.90
   0   3   7   32.90    6.80
   0   3   7   31.50    7.80
   1  -3  -7  212.08   15.40
   1  -3  -7  198.68   15.20
  -1   3   7  251.57   18.40
  -1   3   7  211.98   17.10
  -1   3   7  215.88   16.20
   2  -3  -7  221.28   17.20
   2  -3  -7  229.88   15.80
  -2   3   7  214.98   18.10
  -2   3   7  238.18   18.30
   3  -3  -7  133.09   13.50
   3  -3  -7  124.39   14.90
   3  -3  -7  147.99   12.80
   3  -3  -7  151.08   15.70
  -3   3   7  159.58   15.80
  -3   3   7  154.38   15.80
   4  -3  -7 2308.07  123.99
   4  -3  -7 2472.15  125.89
   4  -3  -7 2630.74  122.79
   4  -3  -7 2578.24  125.39
  -4   3   7 2529.65  124.99
  -4   3   7 2645.94  126.29
  -4   3   7 2402.76  120.89
   5  -3  -7  793.02   46.80
   5  -3  -7  752.32   48.00
   5  -3  -7  809.52   47.70
   5  -3  -7  771.72   44.20
  -5   3   7  756.02   42.60
  -5   3   7  797.02   45.90
  -5   3   7  780.32   48.50
   6  -3  -7   32.20   11.60
   6  -3  -7   14.70   11.40
   6  -3  -7   21.00   11.00
   6  -3  -7   17.90   12.10
  -6   3   7   25.70   15.40
  -6   3   7   21.60    9.50
  -6   3   7   22.00    9.40
   7  -3  -7 1739.83   86.79
   7  -3  -7 1497.15   89.79
   7  -3  -7 1615.84   88.69
   7  -3  -7 1641.54   92.09
  -7   3   7 1558.84   91.39
  -7   3   7 1593.14   83.19
  -7   3   7 1586.14   85.29
   8  -3  -7 1238.58   69.89
   8  -3  -7 1040.90   70.49
   8  -3  -7 1233.28   74.29
   8  -3  -7  918.21   69.19
  -8   3   7 1163.58   63.19
  -8   3   7 1173.48   73.39
   9  -3  -7    8.80   15.60
   9  -3  -7   35.90   15.70
   9  -3  -7   10.70   17.40
  -9   3   7   20.20   12.50
  -9   3   7  -16.70   19.20
  10  -3  -7  123.49   25.60
  10  -3  -7  141.29   28.50
  10  -3  -7  124.69   24.30
  11  -3  -7  293.57   38.80
 -11   3   7  189.88   38.00
 -12  -2  -6  180.08   34.60
  12   2   6  168.38   35.50
  12   2   6  173.48   22.70
  12   2   6  213.78   51.19
  12   2   6  128.39   28.50
 -11  -2  -6   30.90   24.40
  11   2   6   33.50   31.00
  11   2   6   43.00   19.50
  11   2   6   22.20   23.30
 -10  -2  -6  122.49   26.40
  10   2   6  142.09   40.80
  10   2   6  125.39   17.80
  10   2   6  121.79   24.80
  10   2   6  222.28   31.80
   9   2   6  111.69   20.60
  -8  -2  -6  269.67   30.50
   8   2   6  278.57   23.80
   8   2   6  288.47   31.90
   8   2   6  308.67   34.30
   8   2   6  339.87   44.60
  -7  -2  -6  674.03   43.30
   7   2   6  672.13   56.39
   7   2   6  699.03   40.80
   7   2   6  698.73   48.40
   7   2   6  720.63   46.60
   6   2   6 1137.49   62.99
   6   2   6 1099.49   65.39
   6   2   6 1088.09   72.69
   6   2   6 1100.99   58.69
   5   2   6   16.00    9.70
   5   2   6   15.70    6.00
   5   2   6    8.10   10.00
   4   2   6  131.39   20.20
   4   2   6  159.48   16.20
   4   2   6  171.08   14.10
   4   2   6  162.38   18.60
   3   2   6   22.70    7.60
   3   2   6   25.00    5.70
   3   2   6   22.90    8.90
   3   2   6   21.70    4.30
   2   2   6   84.99    9.30
   2   2   6   78.09   10.60
   2   2   6   82.49   12.90
   2   2   6   79.59    8.70
   1   2   6 1400.56   70.29
   1   2   6 1507.55   74.99
   1   2   6 1384.16   70.99
   1   2   6 1439.06   71.39
   0  -2  -6 5875.41  281.07
   0  -2  -6 5478.55  277.97
   0   2   6 5883.81  280.37
   0   2   6 5836.72  278.87
   0   2   6 6718.23  283.67
   0   2   6 5701.73  278.47
   1  -2  -6 4723.63  229.28
   1  -2  -6 4577.34  228.28
  -1   2   6 4750.72  228.18
  -1   2   6 5238.58  231.68
  -1   2   6 4830.22  230.18
   2  -2  -6  327.47   21.70
   2  -2  -6  350.26   20.60
  -2   2   6  345.77   21.70
  -2   2   6  388.46   23.70
  -2   2   6  373.06   19.70
  -2   2   6  341.67   23.00
   3  -2  -6  949.60   47.00
   3  -2  -6  891.21   49.40
   3  -2  -6  937.01   49.40
  -3   2   6  862.51   45.90
  -3   2   6  946.61   50.09
  -3   2   6  939.91   50.09
   4  -2  -6 3083.49  143.09
   4  -2  -6 2849.11  142.29
   4  -2  -6 2942.11  139.59
   4  -2  -6 2812.22  143.29
  -4   2   6 2934.21  142.39
  -4   2   6 2945.01  143.19
  -4   2   6 2728.63  138.89
   5  -2  -6   29.50    9.90
   5  -2  -6   25.10    9.40
   5  -2  -6   37.40    8.50
   5  -2  -6   36.10    9.70
  -5   2   6   56.49   12.80
  -5   2   6   38.60    9.10
  -5   2   6   39.50    8.30
   6  -2  -6  602.34   44.20
   6  -2  -6  691.93   40.80
   6  -2  -6  703.43   42.70
   6  -2  -6  671.43   44.90
  -6   2   6  705.63   46.70
  -6   2   6  683.93   39.20
  -6   2   6  682.73   41.20
   7  -2  -6   67.99   16.20
   7  -2  -6   64.99   15.20
   7  -2  -6   51.69   13.40
   7  -2  -6   52.19   12.50
  -7   2   6   55.39   11.00
  -7   2   6   62.69   12.30
  -7   2   6   56.19   18.30
   8  -2  -6   51.09   16.80
   8  -2  -6   51.69   17.30
   8  -2  -6   50.39   18.90
   8  -2  -6   67.69   16.00
  -8   2   6   51.59   22.20
  -8   2   6   59.79   15.40
   9  -2  -6   12.90   13.90
   9  -2  -6   -6.70   15.00
   9  -2  -6   -2.00   15.00
  -9   2   6   13.60   12.90
  -9   2   6   -6.30   20.10
  10  -2  -6   44.60   19.70
  10  -2  -6   51.59   21.70
  10  -2  -6   34.30   18.00
 -10   2   6   33.60   24.60
 -10   2   6   19.50   14.10
  11  -2  -6   50.79   23.30
  11  -2  -6   81.59   25.10
  11  -2  -6   49.50   19.70
 -11   2   6   24.70   25.30
 -11   2   6   84.79   18.50
  12  -2  -6  100.89   26.10
  12  -2  -6   83.39   22.00
  12  -2  -6   95.29   27.60
  12   1   5  174.18   37.50
  12   1   5  197.78   24.80
  12   1   5  204.48   50.49
  12   1   5  147.19   33.00
  11   1   5  236.18   46.90
  11   1   5  168.28   21.80
  11   1   5  308.07   43.50
  10   1   5  127.99   23.50
  10   1   5   98.39   24.10
  -9  -1  -5   71.99   21.70
   9   1   5   89.89   31.30
   9   1   5   66.59   12.50
   9   1   5   90.29   23.90
   9   1   5   71.09   20.10
  -8  -1  -5  223.98   30.00
   8   1   5  175.68   20.40
   8   1   5  185.38   35.20
   8   1   5  238.58   31.50
   8   1   5  267.87   31.20
  -7  -1  -5  493.85   35.60
   7   1   5  457.15   46.80
   7   1   5  490.25   38.50
   7   1   5  394.56   29.60
   7   1   5  516.75   37.40
  -6  -1  -5  627.34   39.20
   6   1   5  662.63   44.10
   6   1   5  643.14   42.10
   6   1   5  637.34   50.89
   6   1   5  643.14   37.30
   5   1   5 2166.68  108.39
   5   1   5 2183.28  110.89
   5   1   5 2192.48  105.29
   5   1   5 1936.51  115.39
   4   1   5 2199.38  113.89
   4   1   5 2321.27  109.99
   4   1   5 2195.48  111.59
   3   1   5  294.47   22.70
   3   1   5  318.07   21.00
   2   1   5 2158.68  106.99
   2   1   5 2204.08  109.29
   2   1   5 2297.27  106.49
   2   1   5 2195.68  112.69
   1   1   5 1569.44   78.39
   1   1   5 1660.63   78.99
   0   1   5   44.90    6.40
   0   1   5   33.90    6.80
   0   1   5   31.40    5.80
   0   1   5   35.40    7.50
   1  -1  -5 2897.01  140.19
   1  -1  -5 2733.83  139.29
  -1   1   5 2810.02  140.99
  -1   1   5 2765.12  138.69
  -1   1   5 3226.48  142.49
  -1   1   5 3131.29  139.29
   2  -1  -5  390.06   21.60
   2  -1  -5  382.06   23.20
  -2   1   5  408.86   24.80
  -2   1   5  408.56   22.20
  -2   1   5  407.16   24.50
  -2   1   5  403.66   21.70
   3  -1  -5  376.36   25.20
   3  -1  -5  437.86   23.20
   3  -1  -5  423.06   26.30
   3  -1  -5  444.86   26.00
  -3   1   5  430.06   23.50
  -3   1   5  439.56   26.90
  -3   1   5  472.35   27.40
   4  -1  -5 3484.15  168.98
   4  -1  -5 3511.55  164.98
   4  -1  -5 3478.35  168.08
   4  -1  -5 3387.26  169.28
  -4   1   5 3524.15  168.28
  -4   1   5 3374.46  165.38
  -4   1   5 3498.55  168.78
   5  -1  -5 1521.05   82.49
   5  -1  -5 1475.75   82.19
   5  -1  -5 1568.44   80.69
   5  -1  -5 1606.74   77.79
  -5   1   5 1550.34   77.99
  -5   1   5 1615.24   82.69
  -5   1   5 1566.14   80.09
   6  -1  -5  865.51   54.09
   6  -1  -5  950.90   49.00
   6  -1  -5  884.41   53.99
   6  -1  -5  882.71   51.19
  -6   1   5  883.81   49.80
  -6   1   5  893.61   55.09
  -6   1   5  893.81   48.60
   7  -1  -5  634.84   41.20
   7  -1  -5  590.74   44.50
   7  -1  -5  623.44   44.40
   7  -1  -5  679.83   38.30
  -7   1   5  573.54   47.20
  -7   1   5  664.63   39.50
  -7   1   5  679.13   38.90
   8  -1  -5  277.67   28.40
   8  -1  -5  294.47   32.80
   8  -1  -5  348.07   27.70
   8  -1  -5  236.68   32.10
  -8   1   5  310.97   39.40
  -8   1   5  310.17   26.10
  -8   1   5  319.67   26.90
   9  -1  -5   48.00   14.70
   9  -1  -5   24.90   18.60
   9  -1  -5   35.70   16.80
  -9   1   5   16.30   13.90
  -9   1   5   14.00   21.70
  10  -1  -5  307.77   37.80
  10  -1  -5  291.57   38.50
  10  -1  -5  256.57   31.40
 -10   1   5  263.37   28.60
  11  -1  -5  783.32   62.19
  11  -1  -5  693.63   51.79
  11  -1  -5  707.83   58.59
 -11   1   5  717.43   48.10
 -11   1   5  567.04   60.59
  12  -1  -5  342.87   44.00
  12  -1  -5  200.48   36.20
  12  -1  -5  265.97   36.70
 -12   1   5  259.27   30.80
 -12   0  -4   19.40   31.30
  12   0   4   23.20   12.20
  12   0   4   39.20   32.60
 -11   0  -4   22.20   25.90
  11   0   4   14.20    9.40
  11   0   4  105.79   27.50
  11   0   4   12.60   24.30
  11   0   4   24.50   29.40
 -10   0  -4   48.50   25.10
  10   0   4   46.70   23.60
  10   0   4   35.70   27.10
  10   0   4   18.50   21.10
  10   0   4   23.10   10.30
  -9   0  -4   -5.50   19.70
   9   0   4   13.60   22.20
   9   0   4   -5.20    7.30
   9   0   4    0.40   16.80
   9   0   4    4.90   17.60
  -8   0  -4   66.69   20.70
   8   0   4   49.80   15.70
   8   0   4    8.10    8.40
   8   0   4   11.50   14.80
   8   0   4   15.00   21.60
  -7   0  -4  328.27   32.30
   7   0   4  326.57   23.60
   7   0   4  332.07   25.20
   7   0   4  340.57   43.10
   7   0   4  375.16   33.00
   7   0   4  373.36   34.00
  -6   0  -4  875.31   49.00
   6   0   4  854.31   51.89
   6   0   4  796.42   59.79
   6   0   4  843.82   52.99
   6   0   4  796.22   45.90
   5   0   4  243.08   23.10
   5   0   4  222.18   23.10
   4   0   4 1018.50   57.29
   4   0   4 1004.50   52.99
   4   0   4 1093.89   62.69
   4   0   4  964.10   55.39
   3   0   4 1839.12  105.29
   3   0   4 2061.79  100.59
   3   0   4 2187.38   99.39
   3   0   4 2005.70  102.39
   2   0   4    5.50    5.80
   1   0   4  747.33   41.20
   1   0   4  826.92   39.90
   1   0   4  827.12   39.80
   1   0   4  718.63   42.80
   0   0   4 5906.81  292.17
   0   0   4 6295.47  291.17
   0   0   4 6384.36  292.47
   1   0  -4  300.87   17.90
  -1   0   4  307.47   16.80
  -1   0   4  307.07   20.30
  -1   0   4  322.87   20.00
  -1   0   4  349.77   18.70
   2   0  -4  209.08   11.80
   2   0  -4  191.68   14.10
   2   0  -4  182.58   13.70
  -2   0   4  206.78   11.90
  -2   0   4  174.48   15.90
  -2   0   4  239.58   15.90
  -2   0   4  215.88   13.70
   3   0  -4  815.32   40.50
   3   0  -4  731.53   40.40
   3   0  -4  741.43   39.90
  -3   0   4  757.32   40.70
  -3   0   4  735.43   40.50
  -3   0   4  683.43   37.80
   4   0  -4  341.97   23.00
   4   0  -4  341.17   24.10
   4   0  -4  364.76   24.50
   4   0  -4  352.26   19.70
  -4   0   4  339.87   24.60
  -4   0   4  344.17   23.40
  -4   0   4  342.67   21.00
   5   0  -4   71.09    8.50
   5   0  -4   69.89   12.00
   5   0  -4   75.69   11.40
   5   0  -4   67.29   13.00
  -5   0   4   62.49   10.20
  -5   0   4   74.99    9.80
  -5   0   4   86.09   14.10
   6   0  -4 1795.52   93.79
   6   0  -4 1772.82   90.29
   6   0  -4 1783.72   85.59
   6   0  -4 1684.63   92.59
  -6   0   4 1735.73   88.99
  -6   0   4 1758.12   87.79
  -6   0   4 1709.83   93.09
   7   0  -4  776.12   49.10
   7   0  -4  719.23   44.10
   7   0  -4  709.13   47.30
   7   0  -4  729.93   39.40
  -7   0   4  711.43   50.29
  -7   0   4  754.72   42.10
  -7   0   4  701.23   42.40
   8   0  -4   63.59   17.00
   8   0  -4   42.00   11.50
   8   0  -4   48.20   14.00
   8   0  -4   53.69    9.20
  -8   0   4   39.80    9.60
  -8   0   4   53.39   12.30
  -8   0   4   60.59   19.10
   9   0  -4  216.68   30.70
   9   0  -4  227.78   31.90
   9   0  -4  243.08   26.80
  -9   0   4  197.48   31.10
  -9   0   4  219.78   25.10
  10   0  -4  514.15   47.20
  10   0  -4  527.15   46.50
  10   0  -4  501.15   39.60
 -10   0   4  455.15   48.80
 -10   0   4  488.65   36.90
  11   0  -4    0.70   12.70
  11   0  -4   14.50   18.90
  11   0  -4   19.40   18.50
 -11   0   4  -23.00   21.10
 -11   0   4   15.60   15.10
  12   0  -4  118.89   29.40
  12   0  -4   89.09   25.20
  12   0  -4  108.29   22.40
 -12   0   4  111.89   20.10
 -12   0   4   68.69   29.70
 -13   0   4   18.80   30.20
 -11   1  -3  107.99   30.60
  11  -1   3  216.48   46.90
  11  -1   3  162.18   34.20
  11  -1   3  198.48   24.20
  11  -1   3  318.87   45.90
  10  -1   3  120.99   27.40
  10  -1   3  130.99   21.20
  10  -1   3  150.38   29.10
  10  -1   3  117.99   31.80
  -9   1  -3  389.86   43.20
   9  -1   3  400.76   31.10
   9  -1   3  449.26   54.09
   9  -1   3  400.76   43.10
   9  -1   3  427.96   43.40
  -8   1  -3  725.43   51.69
   8  -1   3  713.23   52.89
   8  -1   3  595.24   41.80
   8  -1   3  702.33   52.59
   8  -1   3  674.13   63.89
  -7   1  -3 1336.07   72.59
   7  -1   3 1124.39   65.69
   7  -1   3 1328.37   76.59
   7  -1   3 1251.47   86.89
   7  -1   3 1261.97   74.79
   6  -1   3   61.39   12.80
   6  -1   3   26.10   15.10
   6  -1   3   30.90   11.00
  -5   1  -3  198.98   18.80
   5  -1   3  165.28   26.00
   5  -1   3  179.78   21.20
   5  -1   3  159.98   16.00
   5  -1   3  187.28   21.80
   5  -1   3  188.18   14.90
  -4   1  -3   87.99   12.60
   4  -1   3   52.29   13.70
   4  -1   3   68.29   11.50
   4  -1   3   60.49   11.50
   3  -1   3  670.83   36.40
   3  -1   3  686.63   43.00
   3  -1   3  698.93   40.00
   3  -1   3  633.44   38.50
   2  -1   3 1164.28   53.39
   2  -1   3  983.40   57.49
   2  -1   3  997.80   55.29
   2  -1   3 1029.80   53.99
   1  -1   3   82.29   10.50
   1  -1   3   82.19    9.90
   0  -1   3    9.20    4.20
   0  -1   3   15.20    4.10
   0  -1   3   11.10    4.40
   0  -1   3   13.60    4.20
   0  -1   3   20.00    5.40
   1   1  -3  969.50   46.00
   1   1  -3  973.20   46.70
  -1  -1   3  956.00   46.00
  -1  -1   3  934.41   48.60
  -1  -1   3  976.40   45.70
  -1  -1   3  837.22   47.80
  -1  -1   3  963.60   47.50
   2   1  -3    4.10    3.90
   2   1  -3    9.10    4.30
  -2  -1   3   10.60    4.70
  -2  -1   3    8.50    3.80
  -2  -1   3    9.60    5.10
  -2  -1   3   11.90    6.30
   3   1  -3  221.88   17.90
   3   1  -3  265.57   18.00
   3   1  -3  267.37   17.70
  -3  -1   3  266.57   16.50
  -3  -1   3  270.87   19.90
  -3  -1   3  285.47   18.70
   4   1  -3 4035.80  195.78
   4   1  -3 4090.49  195.98
   4   1  -3 4060.29  194.58
  -4  -1   3 3892.61  192.58
  -4  -1   3 4140.49  195.08
  -4  -1   3 4090.49  195.38
   5   1  -3 6070.79  289.67
   5   1  -3 5918.01  291.47
   5   1  -3 6187.08  292.37
  -5  -1   3 6194.98  291.47
  -5  -1   3 6004.10  289.47
  -5  -1   3 6023.70  287.67
   6   1  -3  938.41   53.59
   6   1  -3 1019.80   57.89
   6   1  -3  937.91   56.19
  -6  -1   3 1022.30   52.19
  -6  -1   3  974.70   57.99
  -6  -1   3  971.20   53.39
   7   1  -3  263.47   16.70
   7   1  -3  249.88   24.70
   7   1  -3  251.57   26.10
   7   1  -3  256.37   22.20
  -7  -1   3  259.57   29.30
  -7  -1   3  249.58   20.60
  -7  -1   3  226.58   21.00
   8   1  -3  572.44   42.90
   8   1  -3  600.34   39.40
   8   1  -3  620.54   33.30
   8   1  -3  689.63   46.00
  -8  -1   3  613.04   47.20
  -8  -1   3  524.75   36.80
  -8  -1   3  606.74   37.50
   9   1  -3  156.78   20.50
   9   1  -3  181.68   27.40
   9   1  -3  150.78   23.20
  -9  -1   3  168.28   27.10
  -9  -1   3  152.08   22.40
  10   1  -3  107.49   18.20
  10   1  -3   99.29   21.50
  10   1  -3  105.99   25.70
 -10  -1   3   91.09   17.20
 -10  -1   3   99.19   25.40
  11   1  -3  211.88   27.90
  11   1  -3  278.87   37.10
  11   1  -3  204.98   32.60
 -11  -1   3  175.68   31.90
 -11  -1   3  208.18   26.80
  12   1  -3   15.10   18.30
  12   1  -3   26.20   21.70
  12   1  -3   31.50   16.30
 -12  -1   3   17.90   16.50
 -12  -1   3  -14.10   22.30
  13   1  -3    6.00   14.60
  13   1  -3   32.80   25.20
  13   1  -3   33.60   23.00
 -13  -1   3   20.90   16.90
 -11   2  -2   20.50   24.80
  11  -2   2   70.19   28.80
  11  -2   2   63.29   28.40
  11  -2   2    1.40   29.40
  11  -2   2   16.10   11.60
 -10   2  -2   24.60   23.60
  10  -2   2   41.30   12.60
  10  -2   2   47.20   24.60
  10  -2   2   47.40   29.80
  10  -2   2   34.70   23.90
  -9   2  -2  344.37   40.00
   9  -2   2  240.88   27.10
   9  -2   2  336.67   41.40
   9  -2   2  373.06   40.30
   9  -2   2  351.96   54.49
  -8   2  -2  111.39   25.10
   8  -2   2  120.99   20.40
   8  -2   2  174.58   28.80
   8  -2   2  125.79   25.20
   8  -2   2  156.88   35.80
   8  -2   2   96.89   15.30
  -7   2  -2  472.25   41.00
   7  -2   2  470.75   40.40
   7  -2   2  459.65   32.40
   7  -2   2  491.35   41.60
   7  -2   2  545.05   54.99
   7  -2   2  425.36   33.00
  -6   2  -2  229.78   26.60
   6  -2   2  137.29   27.90
   6  -2   2  240.18   26.60
   6  -2   2  213.98   25.90
   6  -2   2  163.18   19.80
   6  -2   2  243.38   19.60
  -5   2  -2    9.30   11.10
   5  -2   2    9.30   10.10
   5  -2   2    5.30   10.10
   5  -2   2   -0.30   12.70
   5  -2   2    1.00    6.60
   5  -2   2    7.30    6.60
  -4   2  -2   15.40    8.00
   4  -2   2    3.70    5.60
   4  -2   2   21.50    5.90
   4  -2   2   15.20    9.20
   4  -2   2   14.00    9.20
   4  -2   2   15.90   11.30
   3  -2   2   62.59   10.80
   3  -2   2   82.19   12.30
   3  -2   2   90.49   15.10
   3  -2   2   66.29    9.00
   3  -2   2   73.49   11.40
   2  -2   2  345.57   20.20
   2  -2   2  286.37   21.30
   2  -2   2  285.27   21.40
   2  -2   2  286.57   22.50
   2  -2   2  295.37   17.10
   1  -2   2 2470.05  123.29
   1  -2   2 2374.56  121.09
   1  -2   2 2511.45  122.39
   1  -2   2 2641.34  120.99
   1  -2   2 2789.72  121.19
   1  -2   2 2296.27  118.79
   0   2  -2 2757.02  128.89
   0  -2   2 2627.54  131.19
   0  -2   2 2764.32  128.89
   0  -2   2 2787.62  131.29
   0  -2   2 2706.43  130.39
  -1  -2   2 6322.97  292.57
  -1  -2   2 6146.08  295.27
   2   2  -2 1270.97   59.99
   2   2  -2 1185.68   59.19
  -2  -2   2 1222.88   58.89
  -2  -2   2 1155.58   62.09
  -2  -2   2 1310.67   59.89
  -2  -2   2 1103.49   59.59
   3   2  -2 2073.79  102.59
   3   2  -2 2064.09  102.49
   3   2  -2 2356.96  103.89
  -3  -2   2 2003.80  101.29
  -3  -2   2 2088.49  102.69
  -3  -2   2 2112.79  101.09
  -3  -2   2 2003.70  104.09
   4   2  -2 1281.27   66.79
   4   2  -2 1276.67   67.49
   4   2  -2 1488.95   69.19
  -4  -2   2 1286.67   65.39
  -4  -2   2 1294.47   67.99
  -4  -2   2 1266.47   67.69
   5   2  -2  315.27   23.50
   5   2  -2  254.77   23.70
   5   2  -2  337.07   22.50
  -5  -2   2  330.27   23.50
  -5  -2   2  330.57   26.20
  -5  -2   2  311.17   20.70
   6   2  -2  277.07   25.80
   6   2  -2  301.97   24.70
   6   2  -2  303.77   22.80
  -6  -2   2  295.07   23.40
  -6  -2   2  294.97   28.00
  -6  -2   2  288.77   20.90
   7   2  -2    3.00    7.60
   7   2  -2   14.90   10.10
   7   2  -2    8.30    7.30
  -7  -2   2   14.50    7.40
  -7  -2   2   14.70   12.60
  -7  -2   2    4.60    7.20
   8   2  -2  228.98   25.20
   8   2  -2  195.28   21.40
   8   2  -2  240.08   27.60
   8   2  -2  217.78   15.10
  -8  -2   2  177.48   25.50
  -8  -2   2  193.78   21.70
  -8  -2   2  195.08   20.40
   9   2  -2  517.15   43.00
   9   2  -2  517.35   44.30
   9   2  -2  542.45   38.40
  -9  -2   2  544.25   46.10
  -9  -2   2  549.35   36.20
  10   2  -2   56.29   15.20
  10   2  -2   98.29   23.50
  10   2  -2   44.70   17.20
 -10  -2   2   85.29   16.20
 -10  -2   2   62.59   22.70
  11   2  -2    9.00   17.60
  11   2  -2   30.30   17.10
  11   2  -2    4.40   11.10
 -11  -2   2   12.80   13.50
 -11  -2   2    8.20   19.60
  12   2  -2  291.77   32.40
  12   2  -2  374.26   43.90
 -12  -2   2  345.37   33.10
  13   2  -2  183.78   35.20
  13   2  -2  168.38   33.20
  13   2  -2  148.19   23.00
 -13  -2   2  127.79   32.20
 -11   3  -1  -21.00   27.00
  11  -3   1   -1.60   26.60
  11  -3   1   34.70   13.50
 -10   3  -1   -5.00   22.70
  10  -3   1   16.90   11.60
  10  -3   1    3.20   22.40
  10  -3   1   13.90   23.70
  10  -3   1  -18.50   27.30
  -9   3  -1   24.50   21.90
   9  -3   1   11.60   25.20
   9  -3   1   14.60   10.60
   9  -3   1   25.00   20.70
   9  -3   1    8.70   21.10
  -8   3  -1   12.60   20.70
   8  -3   1   28.90   18.50
   8  -3   1    9.70   22.30
   8  -3   1   19.90   11.00
   8  -3   1    7.50   11.90
   8  -3   1   -1.20   16.90
  -7   3  -1   73.29   22.50
   7  -3   1   84.39   29.10
   7  -3   1   67.69   19.20
   7  -3   1   67.69   14.10
   7  -3   1   66.29   19.40
   7  -3   1   45.30   13.60
  -6   3  -1    3.50   16.60
   6  -3   1   -1.50    9.10
   6  -3   1   -9.00   12.80
   6  -3   1    3.90   18.30
   6  -3   1   -2.10    9.40
   6  -3   1   -7.80   11.20
  -5   3  -1  365.56   30.30
   5  -3   1  344.67   24.60
   5  -3   1  350.86   27.40
   5  -3   1  350.86   31.10
   5  -3   1  390.56   39.10
   5  -3   1  375.56   30.60
  -4   3  -1  387.86   26.10
   4  -3   1  324.17   24.90
   4  -3   1  362.76   34.70
   4  -3   1  350.96   23.20
   4  -3   1  306.17   26.90
   4  -3   1  340.57   28.70
  -3   3  -1  504.25   29.00
   3  -3   1  479.05   31.90
   3  -3   1  479.75   29.90
   3  -3   1  484.95   32.40
   3  -3   1  501.05   36.40
   3  -3   1  476.75   27.80
  -2   3  -1 2099.89   97.29
   2  -3   1 2172.38   99.69
   2  -3   1 1969.10  101.09
   2  -3   1 1937.91  100.59
   2  -3   1 2157.68  103.69
   2  -3   1 1759.02   96.89
   1  -3   1 1276.87   68.29
   1  -3   1 1467.95   68.49
   1  -3   1 1397.86   69.19
   1  -3   1 1260.17   65.39
   0   3  -1  123.59    8.70
   0  -3   1  140.89   12.70
   0  -3   1  131.79   10.50
   0  -3   1  135.79   11.50
   0  -3   1  133.79    9.60
   1   3  -1 1662.63   76.79
   1   3  -1 1406.36   72.99
  -1  -3   1 1749.82   77.39
  -1  -3   1 1519.65   74.09
  -1  -3   1 1378.06   73.19
  -1  -3   1 1418.26   72.79
[truncated: 833,981 more chars]
