# Supplementary material
Source: publisher figshare collection journal article supplement (https://acs.figshare.com/ndownloader/files/22494656)
Supplement: Supplementary file 1 [file 22494656 › CIF/1T.cif]

data_1t
_audit_creation_date               2019-05-24
_audit_creation_method
;
Olex2 1.2
(compiled 2018.05.29 svn.r3508 for OlexSys, GUI svn.r5506)
;
_shelx_SHELXL_version_number       '2016/6'
_audit_contact_author_address      ?
_audit_contact_author_email        ?
_audit_contact_author_name         ''
_audit_contact_author_phone        ?
_publ_contact_author_id_orcid      ?
_publ_section_references
;
Dolomanov, O.V., Bourhis, L.J., Gildea, R.J, Howard, J.A.K. & Puschmann, H.
 (2009), J. Appl. Cryst. 42, 339-341.

Sheldrick, G.M. (2008). Acta Cryst. A64, 112-122.
;
_chemical_name_common              ?
_chemical_name_systematic          ?
_chemical_formula_moiety           'C22 H17 Cu I N3 O, C6 H5'
_chemical_formula_sum              'C28 H22 Cu I N3 O'
_chemical_formula_weight           606.92
_chemical_melting_point            ?
loop_
  _atom_type_symbol
  _atom_type_description
  _atom_type_scat_dispersion_real
  _atom_type_scat_dispersion_imag
  _atom_type_scat_source
 'C' 'C' 0.0033 0.0016 'International Tables Vol C Tables 4.2.6.8 and 6.1.1.4'
 'H' 'H' 0.0000 0.0000 'International Tables Vol C Tables 4.2.6.8 and 6.1.1.4'
 'Cu' 'Cu' 0.3201 1.2651 'International Tables Vol C Tables 4.2.6.8 and 6.1.1.4'
 'I' 'I' -0.4742 1.8119 'International Tables Vol C Tables 4.2.6.8 and 6.1.1.4'
 'N' 'N' 0.0061 0.0033 'International Tables Vol C Tables 4.2.6.8 and 6.1.1.4'
 'O' 'O' 0.0106 0.0060 'International Tables Vol C Tables 4.2.6.8 and 6.1.1.4'

_shelx_space_group_comment
;
The symmetry employed for this shelxl refinement is uniquely defined
by the following loop, which should always be used as a source of
symmetry information in preference to the above space-group names.
They are only intended as comments.
;
_space_group_crystal_system        'monoclinic'
_space_group_IT_number             15
_space_group_name_H-M_alt          'C 1 2/c 1'
_space_group_name_Hall             '-C 2yc'
loop_
  _space_group_symop_operation_xyz
 'x, y, z'
 '-x, y, -z+1/2'
 'x+1/2, y+1/2, z'
 '-x+1/2, y+1/2, -z+1/2'
 '-x, -y, -z'
 'x, -y, z-1/2'
 '-x+1/2, -y+1/2, -z'
 'x+1/2, -y+1/2, z-1/2'

_cell_length_a                     23.696(4)
_cell_length_b                     12.9253(19)
_cell_length_c                     17.710(3)
_cell_angle_alpha                  90
_cell_angle_beta                   111.762(2)
_cell_angle_gamma                  90
_cell_volume                       5037.4(13)
_cell_formula_units_Z              8
_cell_measurement_reflns_used      9944
_cell_measurement_temperature      100(2)
_cell_measurement_theta_max        27.20
_cell_measurement_theta_min        2.39
_shelx_estimated_absorpt_T_max     0.665
_shelx_estimated_absorpt_T_min     0.470
_exptl_absorpt_coefficient_mu      2.118
_exptl_absorpt_correction_T_max    0.7455
_exptl_absorpt_correction_T_min    0.4561
_exptl_absorpt_correction_type     multi-scan
_exptl_absorpt_process_details    
 'SADABS-2014/5 (Bruker,2014/5) was used for absorption correction. wR2(int) was 0.1180 before and 0.0608 after correction. The Ratio of minimum to maximum transmission is 0.6118. The \l/2 correction factor is 0.00150.'
_exptl_absorpt_special_details     ?
_exptl_crystal_colour              'clear light brown'
_exptl_crystal_colour_lustre       clear
_exptl_crystal_colour_modifier     light
_exptl_crystal_colour_primary      brown
_exptl_crystal_density_diffrn      1.601
_exptl_crystal_density_meas        ?
_exptl_crystal_density_method      ?
_exptl_crystal_description         block
_exptl_crystal_F_000               2408
_exptl_crystal_size_max            0.42
_exptl_crystal_size_mid            0.23
_exptl_crystal_size_min            0.21
_exptl_transmission_factor_max     ?
_exptl_transmission_factor_min     ?
_diffrn_reflns_av_R_equivalents    0.0399
_diffrn_reflns_av_unetI/netI       0.0187
_diffrn_reflns_Laue_measured_fraction_full  1.000
_diffrn_reflns_Laue_measured_fraction_max  1.000
_diffrn_reflns_limit_h_max         29
_diffrn_reflns_limit_h_min         -29
_diffrn_reflns_limit_k_max         16
_diffrn_reflns_limit_k_min         -16
_diffrn_reflns_limit_l_max         22
_diffrn_reflns_limit_l_min         -22
_diffrn_reflns_number              62642
_diffrn_reflns_point_group_measured_fraction_full  1.000
_diffrn_reflns_point_group_measured_fraction_max  1.000
_diffrn_reflns_theta_full          25.242
_diffrn_reflns_theta_max           26.732
_diffrn_reflns_theta_min           1.827
_diffrn_ambient_temperature        100
_diffrn_detector_area_resol_mean   ?
_diffrn_measured_fraction_theta_full  1.000
_diffrn_measured_fraction_theta_max  1.000
_diffrn_measurement_device_type    'Bruker APEX-II CCD'
_diffrn_measurement_method         '\f and \w scans'
_diffrn_radiation_type             MoK\a
_diffrn_radiation_wavelength       0.71073
_diffrn_source                     ?
_diffrn_standards_number           0
_reflns_Friedel_coverage           0.000
_reflns_Friedel_fraction_full      .
_reflns_Friedel_fraction_max       .
_reflns_number_gt                  4473
_reflns_number_total               5359
_reflns_special_details
;
 Reflections were merged by SHELXL according to the crystal
 class for the calculation of statistics and refinement.
 
 _reflns_Friedel_fraction is defined as the number of unique
 Friedel pairs measured divided by the number that would be
 possible theoretically, ignoring centric projections and
 systematic absences.
;
_reflns_threshold_expression       'I > 2\s(I)'
_computing_cell_refinement         'SAINT v8.34A (Bruker, 2013)'
_computing_data_collection         ?
_computing_data_reduction          'SAINT v8.34A (Bruker, 2013)'
_computing_molecular_graphics      'Olex2 (Dolomanov et al., 2009)'
_computing_publication_material    'Olex2 (Dolomanov et al., 2009)'
_computing_structure_refinement    'XL (Sheldrick, 2008)'
_computing_structure_solution      'ShelXS (Sheldrick, 2008)'
_refine_diff_density_max           2.149
_refine_diff_density_min           -1.242
_refine_diff_density_rms           0.166
_refine_ls_extinction_coef         .
_refine_ls_extinction_method       none
_refine_ls_goodness_of_fit_ref     1.071
_refine_ls_hydrogen_treatment      constr
_refine_ls_matrix_type             full
_refine_ls_number_parameters       269
_refine_ls_number_reflns           5359
_refine_ls_number_restraints       0
_refine_ls_R_factor_all            0.0810
_refine_ls_R_factor_gt             0.0641
_refine_ls_restrained_S_all        1.071
_refine_ls_shift/su_max            0.001
_refine_ls_shift/su_mean           0.000
_refine_ls_structure_factor_coef   Fsqd
_refine_ls_weighting_details      
 'w=1/[\s^2^(Fo^2^)+(0.0339P)^2^+123.8145P] where P=(Fo^2^+2Fc^2^)/3'
_refine_ls_weighting_scheme        calc
_refine_ls_wR_factor_gt            0.1358
_refine_ls_wR_factor_ref           0.1507
_refine_special_details            ?
_olex2_refinement_description
;
1. Fixed Uiso
 At 1.2 times of:
  All C(H) groups
 At 1.5 times of:
  All C(H,H,H) groups
2. Uiso/Uaniso restraints and constraints
Uiso(C22S) = Uiso(C26S)
Uanis(C25S) = Uanis(C24S)
3.a Aromatic/amide H refined with riding coordinates:
 C7(H7), C9(H9), C15(H15), C1(H1), C14(H14), C2(H2), C4(H4), C5(H5), C17(H17),
 C12(H12), C18(H18), C13(H13), C19(H19), C20(H20), C23S(H23S), C24S(H24S),
 C25S(H25S), C26S(H26S), C22S(H22S)
3.b Fitted hexagon refined as free rotating group:
 C23S(C24S,C25S,C26S,C27S,C22S)
3.c Idealised Me refined as rotating group:
 C21(H21A,H21B,H21C)
;
_atom_sites_solution_hydrogens     geom
_atom_sites_solution_primary       direct
_atom_sites_solution_secondary     ?
loop_
  _atom_site_label
  _atom_site_type_symbol
  _atom_site_fract_x
  _atom_site_fract_y
  _atom_site_fract_z
  _atom_site_U_iso_or_equiv
  _atom_site_adp_type
  _atom_site_occupancy
  _atom_site_site_symmetry_order
  _atom_site_calc_flag
  _atom_site_refinement_flags_posn
  _atom_site_refinement_flags_adp
  _atom_site_refinement_flags_occupancy
  _atom_site_disorder_assembly
  _atom_site_disorder_group
 I001 I 0.45444(2) 0.63971(4) 0.03570(3) 0.03829(15) Uani 1 1 d . . . . .
 Cu02 Cu 0.50047(3) 0.45103(6) 0.06538(5) 0.0327(2) Uani 1 1 d . . . . .
 N3 N 0.9291(2) 0.1446(4) 0.5524(3) 0.0307(11) Uani 1 1 d . . . . .
 N1 N 0.5690(2) 0.4532(4) 0.1762(3) 0.0331(12) Uani 1 1 d . . . . .
 N2 N 0.7523(2) 0.3885(4) 0.4320(3) 0.0290(11) Uani 1 1 d . . . . .
 C7 C 0.7177(3) 0.5506(5) 0.4639(4) 0.0305(13) Uani 1 1 d . . . . .
 H7 H 0.689007 0.605478 0.447150 0.037 Uiso 1 1 calc R . . . .
 O1 O 0.7923(4) 0.8689(5) 0.7739(3) 0.071(2) Uani 1 1 d . . . . .
 C9 C 0.8062(3) 0.4712(5) 0.5598(4) 0.0313(13) Uani 1 1 d . . . . .
 H9 H 0.839145 0.469374 0.610794 0.038 Uiso 1 1 calc R . . . .
 C8 C 0.7656(3) 0.5546(5) 0.5405(4) 0.0303(13) Uani 1 1 d . . . . .
 C3 C 0.6620(3) 0.4613(5) 0.3313(4) 0.0312(13) Uani 1 1 d . . . . .
 C6 C 0.7124(3) 0.4674(5) 0.4134(4) 0.0288(12) Uani 1 1 d . . . . .
 C10 C 0.7983(3) 0.3914(5) 0.5048(4) 0.0281(12) Uani 1 1 d . . . . .
 C11 C 0.8425(3) 0.3039(5) 0.5227(4) 0.0283(12) Uani 1 1 d . . . . .
 C15 C 0.8402(3) 0.2322(6) 0.4635(4) 0.0383(15) Uani 1 1 d . . . . .
 H15 H 0.808635 0.235665 0.411317 0.046 Uiso 1 1 calc R . . . .
 C16 C 0.7720(3) 0.6397(5) 0.5986(4) 0.0355(14) Uani 1 1 d . . . . .
 C1 C 0.5685(3) 0.5230(7) 0.2320(4) 0.0449(18) Uani 1 1 d . . . . .
 H1 H 0.535897 0.571163 0.217708 0.054 Uiso 1 1 calc R . . . .
 C14 C 0.8843(3) 0.1550(6) 0.4803(4) 0.0411(16) Uani 1 1 d . . . . .
 H14 H 0.882242 0.107673 0.438334 0.049 Uiso 1 1 calc R . . . .
 C2 C 0.6127(3) 0.5287(6) 0.3093(4) 0.0431(17) Uani 1 1 d . . . . .
 H2 H 0.609446 0.578164 0.347120 0.052 Uiso 1 1 calc R . . . .
 C4 C 0.6632(3) 0.3900(5) 0.2732(4) 0.0379(15) Uani 1 1 d . . . . .
 H4 H 0.696163 0.342968 0.285193 0.045 Uiso 1 1 calc R . . . .
 C5 C 0.6166(3) 0.3875(5) 0.1981(4) 0.0401(16) Uani 1 1 d . . . . .
 H5 H 0.618109 0.337008 0.159865 0.048 Uiso 1 1 calc R . . . .
 C17 C 0.7235(3) 0.7021(6) 0.5936(4) 0.0405(16) Uani 1 1 d . . . . .
 H17 H 0.685766 0.692050 0.549861 0.049 Uiso 1 1 calc R . . . .
 C12 C 0.8871(4) 0.2876(6) 0.5982(4) 0.0471(19) Uani 1 1 d . . . . .
 H12 H 0.889113 0.331184 0.642258 0.057 Uiso 1 1 calc R . . . .
 C18 C 0.7279(4) 0.7796(6) 0.6504(5) 0.0479(19) Uani 1 1 d . . . . .
 H18 H 0.693480 0.821010 0.645051 0.057 Uiso 1 1 calc R . . . .
 C00O C 0.7822(5) 0.7960(6) 0.7142(4) 0.052(2) Uani 1 1 d . . . . .
 C13 C 0.9290(4) 0.2090(6) 0.6107(4) 0.0478(19) Uani 1 1 d . . . . .
 H13 H 0.959241 0.200654 0.663517 0.057 Uiso 1 1 calc R . . . .
 C19 C 0.8329(5) 0.7371(7) 0.7181(5) 0.073(3) Uani 1 1 d . . . . .
 H19 H 0.871122 0.750255 0.759999 0.087 Uiso 1 1 calc R . . . .
 C20 C 0.8280(5) 0.6614(7) 0.6628(5) 0.067(3) Uani 1 1 d . . . . .
 H20 H 0.862925 0.622003 0.667191 0.081 Uiso 1 1 calc R . . . .
 C21 C 0.7427(6) 0.9331(9) 0.7689(7) 0.088(4) Uani 1 1 d . . . . .
 H21A H 0.727212 0.967511 0.715821 0.132 Uiso 1 1 calc GR . . . .
 H21B H 0.756143 0.985354 0.812050 0.132 Uiso 1 1 calc GR . . . .
 H21C H 0.710409 0.891011 0.775402 0.132 Uiso 1 1 calc GR . . . .
 C23S C 0.9275(10) 0.5851(13) 0.3913(17) 0.274(16) Uiso 1 1 d . . . . .
 H23S H 0.911355 0.644969 0.406994 0.328 Uiso 1 1 calc R . . . .
 C24S C 0.9297(8) 0.4918(17) 0.4314(14) 0.278(13) Uani 1 1 d G . . . .
 H24S H 0.915039 0.487973 0.474461 0.334 Uiso 1 1 calc R . . . .
 C25S C 0.9534(9) 0.4042(12) 0.4085(17) 0.278(13) Uani 1 1 d G . . . .
 H25S H 0.954925 0.340461 0.435842 0.334 Uiso 1 1 calc R . . . .
 C26S C 0.9749(10) 0.410(2) 0.3454(17) 0.352(16) Uiso 1 1 d G . . . .
 H26S H 0.991126 0.349944 0.329756 0.423 Uiso 1 1 calc R . . . .
 C27S C 0.9727(12) 0.503(3) 0.3054(13) 0.43(3) Uiso 1 1 d G . . . .
 C22S C 0.9491(12) 0.591(2) 0.3283(16) 0.352(16) Uiso 1 1 d G . . . .
 H22S H 0.947557 0.654451 0.300906 0.423 Uiso 1 1 calc R . . . .

loop_
  _atom_site_aniso_label
  _atom_site_aniso_U_11
  _atom_site_aniso_U_22
  _atom_site_aniso_U_33
  _atom_site_aniso_U_23
  _atom_site_aniso_U_13
  _atom_site_aniso_U_12
 I001 0.0383(3) 0.0375(3) 0.0451(3) -0.00146(19) 0.0225(2) -0.00064(18)
 Cu02 0.0288(4) 0.0361(4) 0.0321(4) -0.0022(3) 0.0098(3) -0.0081(3)
 N3 0.029(3) 0.034(3) 0.030(3) 0.001(2) 0.013(2) 0.005(2)
 N1 0.030(3) 0.035(3) 0.033(3) -0.003(2) 0.009(2) 0.001(2)
 N2 0.028(3) 0.033(3) 0.028(3) 0.001(2) 0.012(2) 0.004(2)
 C7 0.035(3) 0.026(3) 0.032(3) 0.005(2) 0.014(3) 0.003(3)
 O1 0.141(7) 0.043(3) 0.037(3) -0.010(3) 0.042(4) -0.016(4)
 C9 0.033(3) 0.032(3) 0.027(3) 0.002(2) 0.009(3) 0.003(3)
 C8 0.036(3) 0.027(3) 0.029(3) 0.002(2) 0.012(3) -0.001(3)
 C3 0.034(3) 0.029(3) 0.035(3) 0.004(3) 0.018(3) -0.002(3)
 C6 0.031(3) 0.027(3) 0.031(3) 0.003(2) 0.016(3) -0.003(2)
 C10 0.030(3) 0.028(3) 0.029(3) 0.005(2) 0.014(2) 0.000(2)
 C11 0.029(3) 0.030(3) 0.027(3) -0.002(2) 0.011(2) 0.003(2)
 C15 0.025(3) 0.047(4) 0.034(3) -0.010(3) 0.000(3) 0.006(3)
 C16 0.052(4) 0.024(3) 0.028(3) 0.003(2) 0.011(3) -0.004(3)
 C1 0.031(3) 0.066(5) 0.036(4) -0.013(3) 0.011(3) 0.013(3)
 C14 0.031(3) 0.053(4) 0.036(3) -0.015(3) 0.009(3) 0.007(3)
 C2 0.034(3) 0.063(5) 0.032(3) -0.015(3) 0.012(3) 0.011(3)
 C4 0.040(4) 0.029(3) 0.038(4) -0.004(3) 0.007(3) 0.008(3)
 C5 0.046(4) 0.031(3) 0.040(4) -0.009(3) 0.011(3) 0.001(3)
 C17 0.047(4) 0.040(4) 0.041(4) -0.006(3) 0.024(3) -0.011(3)
 C12 0.058(5) 0.048(4) 0.027(3) -0.008(3) 0.004(3) 0.017(4)
 C18 0.062(5) 0.040(4) 0.060(5) -0.010(4) 0.044(4) -0.012(4)
 C00O 0.093(6) 0.036(4) 0.032(4) -0.001(3) 0.028(4) -0.014(4)
 C13 0.056(5) 0.050(4) 0.029(3) -0.005(3) 0.007(3) 0.022(4)
 C19 0.091(7) 0.050(5) 0.042(4) -0.008(4) -0.017(5) 0.013(5)
 C20 0.074(6) 0.051(5) 0.049(5) -0.006(4) -0.009(4) 0.020(5)
 C21 0.124(10) 0.081(7) 0.093(8) -0.054(6) 0.079(8) -0.054(7)
 C24S 0.25(2) 0.109(13) 0.57(4) -0.04(2) 0.26(3) -0.023(15)
 C25S 0.25(2) 0.109(13) 0.57(4) -0.04(2) 0.26(3) -0.023(15)

_geom_special_details
;
 All esds (except the esd in the dihedral angle between two l.s. planes)
 are estimated using the full covariance matrix.  The cell esds are taken
 into account individually in the estimation of esds in distances, angles
 and torsion angles; correlations between esds in cell parameters are only
 used when they are defined by crystal symmetry.  An approximate (isotropic)
 treatment of cell esds is used for estimating esds involving l.s. planes.
;
loop_
  _geom_bond_atom_site_label_1
  _geom_bond_atom_site_label_2
  _geom_bond_distance
  _geom_bond_site_symmetry_2
  _geom_bond_publ_flag
 I001 Cu02 2.6435(10) . ?
 I001 Cu02 2.6720(10) 5_665 ?
 Cu02 Cu02 2.6319(16) 5_665 ?
 Cu02 N3 2.037(5) 8_455 ?
 Cu02 N1 2.031(5) . ?
 N3 C14 1.332(8) . ?
 N3 C13 1.327(9) . ?
 N1 C1 1.342(9) . ?
 N1 C5 1.349(9) . ?
 N2 C6 1.346(8) . ?
 N2 C10 1.346(8) . ?
 C7 H7 0.9500 . ?
 C7 C8 1.411(9) . ?
 C7 C6 1.374(9) . ?
 O1 C00O 1.370(9) . ?
 O1 C21 1.415(14) . ?
 C9 H9 0.9500 . ?
 C9 C8 1.400(9) . ?
 C9 C10 1.383(9) . ?
 C8 C16 1.476(9) . ?
 C3 C6 1.503(9) . ?
 C3 C2 1.393(9) . ?
 C3 C4 1.388(9) . ?
 C10 C11 1.492(8) . ?
 C11 C15 1.386(9) . ?
 C11 C12 1.379(9) . ?
 C15 H15 0.9500 . ?
 C15 C14 1.394(9) . ?
 C16 C17 1.380(10) . ?
 C16 C20 1.418(11) . ?
 C1 H1 0.9500 . ?
 C1 C2 1.383(9) . ?
 C14 H14 0.9500 . ?
 C2 H2 0.9500 . ?
 C4 H4 0.9500 . ?
 C4 C5 1.378(10) . ?
 C5 H5 0.9500 . ?
 C17 H17 0.9500 . ?
 C17 C18 1.395(10) . ?
 C12 H12 0.9500 . ?
 C12 C13 1.379(10) . ?
 C18 H18 0.9500 . ?
 C18 C00O 1.379(12) . ?
 C00O C19 1.401(14) . ?
 C13 H13 0.9500 . ?
 C19 H19 0.9500 . ?
 C19 C20 1.359(12) . ?
 C20 H20 0.9500 . ?
 C21 H21A 0.9800 . ?
 C21 H21B 0.9800 . ?
 C21 H21C 0.9800 . ?
 C23S H23S 0.9500 . ?
 C23S C24S 1.3900 . ?
 C23S C22S 1.3900 . ?
 C24S H24S 0.9500 . ?
 C24S C25S 1.3900 . ?
 C25S H25S 0.9500 . ?
 C25S C26S 1.3900 . ?
 C26S H26S 0.9500 . ?
 C26S C27S 1.3900 . ?
 C27S C22S 1.3900 . ?
 C22S H22S 0.9500 . ?

loop_
  _geom_angle_atom_site_label_1
  _geom_angle_atom_site_label_2
  _geom_angle_atom_site_label_3
  _geom_angle
  _geom_angle_site_symmetry_1
  _geom_angle_site_symmetry_3
  _geom_angle_publ_flag
 Cu02 I001 Cu02 59.36(3) . 5_665 ?
 I001 Cu02 I001 120.65(3) . 5_665 ?
 Cu02 Cu02 I001 60.86(3) 5_665 . ?
 Cu02 Cu02 I001 59.79(3) 5_665 5_665 ?
 N3 Cu02 I001 100.35(15) 8_455 5_665 ?
 N3 Cu02 I001 105.86(16) 8_455 . ?
 N3 Cu02 Cu02 117.18(15) 8_455 5_665 ?
 N1 Cu02 I001 107.62(16) . . ?
 N1 Cu02 I001 106.16(16) . 5_665 ?
 N1 Cu02 Cu02 125.92(16) . 5_665 ?
 N1 Cu02 N3 116.7(2) . 8_455 ?
 C14 N3 Cu02 120.2(4) . 8_556 ?
 C13 N3 Cu02 122.3(5) . 8_556 ?
 C13 N3 C14 116.8(6) . . ?
 C1 N1 Cu02 119.9(5) . . ?
 C1 N1 C5 116.5(6) . . ?
 C5 N1 Cu02 123.6(5) . . ?
 C6 N2 C10 117.4(5) . . ?
 C8 C7 H7 120.0 . . ?
 C6 C7 H7 120.0 . . ?
 C6 C7 C8 120.0(6) . . ?
 C00O O1 C21 116.9(8) . . ?
 C8 C9 H9 120.0 . . ?
 C10 C9 H9 120.0 . . ?
 C10 C9 C8 120.1(6) . . ?
 C7 C8 C16 122.4(6) . . ?
 C9 C8 C7 116.3(6) . . ?
 C9 C8 C16 121.3(6) . . ?
 C2 C3 C6 121.4(6) . . ?
 C4 C3 C6 121.7(6) . . ?
 C4 C3 C2 116.9(6) . . ?
 N2 C6 C7 123.2(6) . . ?
 N2 C6 C3 115.5(5) . . ?
 C7 C6 C3 121.2(6) . . ?
 N2 C10 C9 123.0(6) . . ?
 N2 C10 C11 116.0(5) . . ?
 C9 C10 C11 121.0(6) . . ?
 C15 C11 C10 121.2(6) . . ?
 C12 C11 C10 123.2(6) . . ?
 C12 C11 C15 115.5(6) . . ?
 C11 C15 H15 120.0 . . ?
 C11 C15 C14 120.1(6) . . ?
 C14 C15 H15 120.0 . . ?
 C17 C16 C8 121.6(6) . . ?
 C17 C16 C20 116.5(7) . . ?
 C20 C16 C8 122.0(7) . . ?
 N1 C1 H1 118.2 . . ?
 N1 C1 C2 123.6(7) . . ?
 C2 C1 H1 118.2 . . ?
 N3 C14 C15 123.1(6) . . ?
 N3 C14 H14 118.5 . . ?
 C15 C14 H14 118.5 . . ?
 C3 C2 H2 120.2 . . ?
 C1 C2 C3 119.5(6) . . ?
 C1 C2 H2 120.2 . . ?
 C3 C4 H4 119.9 . . ?
 C5 C4 C3 120.2(6) . . ?
 C5 C4 H4 119.9 . . ?
 N1 C5 C4 123.2(6) . . ?
 N1 C5 H5 118.4 . . ?
 C4 C5 H5 118.4 . . ?
 C16 C17 H17 118.8 . . ?
 C16 C17 C18 122.4(7) . . ?
 C18 C17 H17 118.8 . . ?
 C11 C12 H12 119.4 . . ?
 C11 C12 C13 121.1(6) . . ?
 C13 C12 H12 119.4 . . ?
 C17 C18 H18 120.1 . . ?
 C00O C18 C17 119.9(8) . . ?
 C00O C18 H18 120.1 . . ?
 O1 C00O C18 125.5(9) . . ?
 O1 C00O C19 115.8(8) . . ?
 C18 C00O C19 118.7(7) . . ?
 N3 C13 C12 123.1(6) . . ?
 N3 C13 H13 118.5 . . ?
 C12 C13 H13 118.5 . . ?
 C00O C19 H19 119.6 . . ?
 C20 C19 C00O 120.9(9) . . ?
 C20 C19 H19 119.6 . . ?
 C16 C20 H20 119.2 . . ?
 C19 C20 C16 121.6(9) . . ?
 C19 C20 H20 119.2 . . ?
 O1 C21 H21A 109.5 . . ?
 O1 C21 H21B 109.5 . . ?
 O1 C21 H21C 109.5 . . ?
 H21A C21 H21B 109.5 . . ?
 H21A C21 H21C 109.5 . . ?
 H21B C21 H21C 109.5 . . ?
 C24S C23S H23S 120.0 . . ?
 C24S C23S C22S 120.0 . . ?
 C22S C23S H23S 120.0 . . ?
 C23S C24S H24S 120.0 . . ?
 C25S C24S C23S 120.0 . . ?
 C25S C24S H24S 120.0 . . ?
 C24S C25S H25S 120.0 . . ?
 C26S C25S C24S 120.0 . . ?
 C26S C25S H25S 120.0 . . ?
 C25S C26S H26S 120.0 . . ?
 C25S C26S C27S 120.0 . . ?
 C27S C26S H26S 120.0 . . ?
 C22S C27S C26S 120.0 . . ?
 C23S C22S H22S 120.0 . . ?
 C27S C22S C23S 120.0 . . ?
 C27S C22S H22S 120.0 . . ?

_shelx_res_file
;
TITL 1t.res in C2/c
    1t.res
    created by SHELXL-2016/6 at 21:01:58 on 24-May-2019
REM Old TITL SKBENZENB_0m in C2/c
REM SHELXT solution in C2/c
REM R1 0.134, Rweak 0.003, Alpha 0.036, Orientation as input
REM Formula found by SHELXT: C21 N5 Cu I
CELL 0.71073 23.6956 12.9253 17.7096 90 111.762 90
ZERR 8 0.0035 0.0019 0.0027 0 0.002 0
LATT 7
SYMM -X,+Y,0.5-Z
SFAC C H Cu I N O
UNIT 224 176 8 8 24 8
EADP C22S C26S
EADP C25S C24S

L.S. 10
PLAN  20
SIZE 0.42 0.23 0.21
TEMP -173.15
BOND $H
fmap 2
acta
REM <olex2.extras>
REM <HklSrc "%.\\1t.hkl">
REM </olex2.extras>

WGHT    0.033900  123.814507
FVAR       0.18362
I001  4    0.454436    0.639705    0.035698    11.00000    0.03833    0.03751 =
         0.04511   -0.00146    0.02254   -0.00064
CU02  3    0.500472    0.451030    0.065378    11.00000    0.02880    0.03606 =
         0.03209   -0.00218    0.00985   -0.00812
N3    5    0.929146    0.144558    0.552441    11.00000    0.02918    0.03444 =
         0.03013    0.00132    0.01278    0.00452
N1    5    0.568986    0.453172    0.176196    11.00000    0.02960    0.03468 =
         0.03315   -0.00269    0.00940    0.00096
N2    5    0.752294    0.388479    0.432011    11.00000    0.02794    0.03278 =
         0.02760    0.00124    0.01193    0.00369
C7    1    0.717665    0.550618    0.463851    11.00000    0.03506    0.02551 =
         0.03192    0.00489    0.01355    0.00273
AFIX  43
H7    2    0.689007    0.605478    0.447150    11.00000   -1.20000
AFIX   0
O1    6    0.792300    0.868876    0.773912    11.00000    0.14135    0.04279 =
         0.03725   -0.01037    0.04250   -0.01640
C9    1    0.806192    0.471171    0.559821    11.00000    0.03334    0.03195 =
         0.02704    0.00156    0.00941    0.00291
AFIX  43
H9    2    0.839145    0.469374    0.610794    11.00000   -1.20000
AFIX   0
C8    1    0.765603    0.554586    0.540450    11.00000    0.03560    0.02668 =
         0.02855    0.00217    0.01185   -0.00088
C3    1    0.662046    0.461258    0.331257    11.00000    0.03366    0.02916 =
         0.03496    0.00383    0.01773   -0.00197
C6    1    0.712427    0.467407    0.413406    11.00000    0.03116    0.02744 =
         0.03141    0.00340    0.01565   -0.00276
C10   1    0.798348    0.391376    0.504800    11.00000    0.03048    0.02767 =
         0.02881    0.00458    0.01413    0.00048
C11   1    0.842452    0.303893    0.522715    11.00000    0.02923    0.02980 =
         0.02689   -0.00184    0.01147    0.00261
C15   1    0.840226    0.232204    0.463459    11.00000    0.02482    0.04724 =
         0.03377   -0.01008    0.00038    0.00573
AFIX  43
H15   2    0.808635    0.235665    0.411317    11.00000   -1.20000
AFIX   0
C16   1    0.771987    0.639699    0.598645    11.00000    0.05152    0.02419 =
         0.02804    0.00326    0.01149   -0.00401
C1    1    0.568462    0.522979    0.232044    11.00000    0.03113    0.06629 =
         0.03625   -0.01348    0.01118    0.01272
AFIX  43
H1    2    0.535897    0.571163    0.217708    11.00000   -1.20000
AFIX   0
C14   1    0.884302    0.155025    0.480303    11.00000    0.03121    0.05336 =
         0.03556   -0.01496    0.00871    0.00733
AFIX  43
H14   2    0.882242    0.107673    0.438334    11.00000   -1.20000
AFIX   0
C2    1    0.612695    0.528650    0.309293    11.00000    0.03395    0.06305 =
         0.03237   -0.01540    0.01243    0.01052
AFIX  43
H2    2    0.609446    0.578164    0.347120    11.00000   -1.20000
AFIX   0
C4    1    0.663193    0.390042    0.273161    11.00000    0.03973    0.02921 =
         0.03847   -0.00421    0.00722    0.00794
AFIX  43
H4    2    0.696163    0.342968    0.285193    11.00000   -1.20000
AFIX   0
C5    1    0.616612    0.387479    0.198074    11.00000    0.04575    0.03053 =
         0.04021   -0.00905    0.01146    0.00148
AFIX  43
H5    2    0.618109    0.337008    0.159865    11.00000   -1.20000
AFIX   0
C17   1    0.723495    0.702148    0.593581    11.00000    0.04696    0.04024 =
         0.04070   -0.00579    0.02356   -0.01097
AFIX  43
H17   2    0.685766    0.692050    0.549861    11.00000   -1.20000
AFIX   0
C12   1    0.887148    0.287577    0.598171    11.00000    0.05753    0.04782 =
         0.02653   -0.00806    0.00450    0.01747
AFIX  43
H12   2    0.889113    0.331184    0.642258    11.00000   -1.20000
AFIX   0
C18   1    0.727874    0.779609    0.650367    11.00000    0.06178    0.03976 =
         0.06038   -0.01020    0.04383   -0.01189
AFIX  43
H18   2    0.693480    0.821010    0.645051    11.00000   -1.20000
AFIX   0
C00O  1    0.782210    0.795953    0.714209    11.00000    0.09261    0.03560 =
         0.03250   -0.00138    0.02839   -0.01389
C13   1    0.929041    0.209008    0.610693    11.00000    0.05641    0.05039 =
         0.02867   -0.00525    0.00666    0.02156
AFIX  43
H13   2    0.959241    0.200654    0.663517    11.00000   -1.20000
AFIX   0
C19   1    0.832859    0.737079    0.718118    11.00000    0.09096    0.04965 =
         0.04198   -0.00835   -0.01708    0.01330
AFIX  43
H19   2    0.871122    0.750255    0.759999    11.00000   -1.20000
AFIX   0
C20   1    0.827986    0.661364    0.662793    11.00000    0.07442    0.05069 =
         0.04892   -0.00624   -0.00923    0.01965
AFIX  43
H20   2    0.862925    0.622003    0.667191    11.00000   -1.20000
AFIX   0
C21   1    0.742706    0.933123    0.768912    11.00000    0.12375    0.08086 =
         0.09348   -0.05399    0.07944   -0.05383
AFIX 137
H21A  2    0.727212    0.967511    0.715821    11.00000   -1.50000
H21B  2    0.756143    0.985354    0.812050    11.00000   -1.50000
H21C  2    0.710409    0.891011    0.775402    11.00000   -1.50000
AFIX  66

C23S  1    0.927548    0.585081    0.391315    11.00000    0.27372
AFIX  43
H23S  2    0.911355    0.644969    0.406994    11.00000   -1.20000
AFIX  65
C24S  1    0.929736    0.491823    0.431392    11.00000    0.25130    0.10889 =
         0.56717   -0.04300    0.25953   -0.02295
AFIX  43
H24S  2    0.915039    0.487973    0.474461    11.00000   -1.20000
AFIX  65
C25S  1    0.953429    0.404199    0.408452    11.00000    0.25130    0.10889 =
         0.56717   -0.04300    0.25953   -0.02295
AFIX  43
H25S  2    0.954925    0.340461    0.435842    11.00000   -1.20000
AFIX  65
C26S  1    0.974933    0.409831    0.345434    11.00000    0.35230
AFIX  43
H26S  2    0.991126    0.349944    0.329756    11.00000   -1.20000
AFIX  65
C27S  1    0.972745    0.503089    0.305357    11.00000    0.42780
C22S  1    0.949052    0.590714    0.328297    11.00000    0.35230
AFIX  43
H22S  2    0.947557    0.654451    0.300906    11.00000   -1.20000
AFIX   0
HKLF 4


REM  1t.res in C2/c
REM R1 =  0.0641 for    4473 Fo > 4sig(Fo)  and  0.0810 for all    5359 data
REM    269 parameters refined using      0 restraints

END

WGHT      0.0338    123.8986

REM Highest difference peak  2.149,  deepest hole -1.242,  1-sigma level  0.166
Q1    1   0.9104  0.0472  0.5071  11.00000  0.05    2.15
Q2    1   0.5907  0.5476  0.3599  11.00000  0.05    1.82
Q3    1   0.8648  0.1387  0.6065  11.00000  0.05    1.56
Q4    1   0.4816  0.6584  0.0734  11.00000  0.05    1.45
Q5    1   1.0000  0.5429  0.2500  10.50000  0.05    1.17
Q6    1   0.9485  0.5850  0.4668  11.00000  0.05    1.17
Q7    1   1.0024  0.3416  0.2748  11.00000  0.05    1.13
Q8    1   0.9968  0.3331  0.4336  11.00000  0.05    1.09
Q9    1   0.9996  0.2267  0.5646  11.00000  0.05    0.94
Q10   1   1.0001  0.6078  0.4674  11.00000  0.05    0.90
Q11   1   0.4282  0.6785  0.0212  11.00000  0.05    0.85
Q12   1   0.9405  0.4246  0.5094  11.00000  0.05    0.85
Q13   1   1.0071  0.4888  0.3029  11.00000  0.05    0.82
Q14   1   0.4594  0.4664  0.0372  11.00000  0.05    0.80
Q15   1   1.0188  0.4156  0.4394  11.00000  0.05    0.78
Q16   1   0.9078  0.6724  0.5041  11.00000  0.05    0.75
Q17   1   1.0000  0.4554  0.2500  10.50000  0.05    0.71
Q18   1   0.9792  0.4425  0.5674  11.00000  0.05    0.70
Q19   1   0.9302  0.6048  0.5044  11.00000  0.05    0.70
Q20   1   0.9057  0.5422  0.4809  11.00000  0.05    0.70
;
_shelx_res_checksum                35732
_shelx_hkl_file
;
   2   0   0 2098.99   61.09
   2   0   0 2625.24   60.99
   2   0   0 2649.63   61.19
  -2   0   0 2709.23   61.49
  -2   0   0 2168.48   61.59
  -4   0   0 8069.39  196.08
  -4   0   0 8092.69  195.18
  -4   0   0 8002.50  196.88
  -4   0   0 8066.49  195.28
   4   0   0 7825.92  195.18
   4   0   0 7796.92  195.18
   4   0   0 7605.24  194.88
   4   0   0 8014.50  195.58
   6   0   0    8.30    2.20
   6   0   0   11.00    2.10
  -6   0   0   16.30    3.20
  -6   0   0   10.10    2.20
   6   0   0   11.50    2.00
   6   0   0   10.40    2.40
  -6   0   0   11.70    2.00
  -6   0   0   11.30    2.60
   8   0   0  389.96   13.50
  -8   0   0  401.06   14.90
  -8   0   0  399.06   13.60
  -8   0   0  397.26   16.00
   8   0   0  400.56   13.80
   8   0   0  399.96   14.50
   8   0   0  382.56   13.90
  -8   0   0  407.76   13.70
 -10   0   0  507.95   18.80
  10   0   0  483.45   17.30
  10   0   0  489.35   17.50
 -10   0   0  514.05   17.10
  10   0   0  517.65   18.40
 -10   0   0  488.75   19.90
  10   0   0  490.95   17.00
 -10   0   0  486.45   16.90
  12   0   0   91.99    9.30
  12   0   0   95.79    8.50
  12   0   0   94.29    8.00
 -12   0   0  104.29   10.40
 -12   0   0  100.89    7.80
 -12   0   0   95.49    7.70
 -12   0   0  100.19    9.10
  12   0   0   89.29    8.20
 -14   0   0   52.99   10.70
  14   0   0   46.20    6.50
  14   0   0   44.90    6.00
  14   0   0   63.79    9.90
 -14   0   0   44.20    5.70
  14   0   0   56.39    8.00
 -14   0   0   53.99    7.60
 -14   0   0   54.69    9.10
  16   0   0  257.47   14.70
 -16   0   0  253.37   16.40
  16   0   0  260.67   16.70
 -16   0   0  269.57   13.90
 -16   0   0  246.28   14.30
  16   0   0  258.07   15.50
 -16   0   0  266.67   18.60
  16   0   0  239.38   15.20
  18   0   0 1788.12   54.09
  18   0   0 1717.13   57.89
 -18   0   0 1772.42   53.59
 -18   0   0 1759.42   56.29
  18   0   0 1809.02   55.09
 -18   0   0 1856.11   60.19
  18   0   0 1798.22   56.69
 -20   0   0  831.22   31.80
  20   0   0  864.11   33.80
 -20   0   0  818.32   34.40
  20   0   0  862.91   33.00
 -20   0   0  848.82   38.10
  20   0   0  844.12   35.20
  22   0   0  255.97   21.10
 -22   0   0  250.27   24.60
  22   0   0  266.97   20.50
  22   0   0  250.37   21.90
 -22   0   0  269.97   18.90
 -22   0   0  250.77   21.00
  24   0   0  666.93   32.70
  24   0   0  676.13   32.30
 -24   0   0  654.83   32.50
 -24   0   0  631.64   29.70
 -24   0   0  656.53   36.30
  24   0   0  618.84   34.00
 -26   0   0  398.26   30.60
  26   0   0  397.36   27.30
  26   0   0  394.06   27.80
 -26   0   0  364.86   26.40
 -26   0   0  362.26   24.00
  26   0   0  347.67   29.10
   1  -1   0 7775.52  177.08
  -1  -1   0 7643.84  177.08
  -1  -1   0 7047.40  177.28
   1  -1   0 7568.44  177.68
  -1   1   0 7228.08  177.78
   1   1   0 6198.38  177.68
  -1   1   0 6570.54  178.48
   1   1   0 7454.75  177.18
   1   1   0 7408.96  178.08
   3  -1   0 1563.14   39.40
   3  -1   0 1423.16   38.70
   3  -1   0 1505.35   38.90
  -3  -1   0 1568.24   38.70
  -3  -1   0 1542.85   39.40
  -3  -1   0 1586.14   39.40
   3  -1   0 1579.24   39.30
   3   1   0 1496.85   38.50
   3   1   0 1475.85   38.10
   3   1   0 1522.85   38.60
  -3   1   0 1496.05   39.70
  -3   1   0 1464.45   38.00
   3   1   0 1523.75   39.20
  -3   1   0 1516.35   39.00
  -3   1   0 1528.45   40.10
   3   1   0 1515.65   38.80
   5  -1   0  240.68    9.50
  -5  -1   0  260.57    8.90
   5  -1   0  242.08    9.70
   5  -1   0  237.98    9.10
   5  -1   0  269.37   10.20
  -5  -1   0  267.07   10.00
  -5  -1   0  270.47   10.60
  -5   1   0  243.88   10.70
   5   1   0  269.07    9.40
   5   1   0  277.57    9.60
  -5   1   0  254.37    9.60
  -5   1   0  234.18    9.90
   5   1   0  262.37    8.90
   5   1   0  264.57    8.90
  -7  -1   0  166.88    9.00
   7  -1   0  131.39    7.60
  -7  -1   0  156.78    8.20
  -7  -1   0  155.88    7.10
   7  -1   0  137.49    7.80
   7  -1   0  135.39    7.30
   7  -1   0  141.89    6.90
   7   1   0  157.58    7.10
  -7   1   0  156.28    7.90
   7   1   0  158.38    7.90
   7   1   0  163.78    7.80
   7   1   0  151.48    7.20
  -7   1   0  141.99    7.80
  -7   1   0  149.79    9.00
   9  -1   0   15.20    3.50
   9  -1   0   15.70    2.90
   9  -1   0    9.20    3.30
  -9  -1   0   15.40    3.10
  -9  -1   0   15.00    2.70
  -9  -1   0   16.50    3.50
   9  -1   0   16.10    3.50
   9  -1   0   13.30    2.90
   9   1   0   14.90    2.80
   9   1   0   10.90    2.80
   9   1   0   15.20    3.30
   9   1   0   18.00    3.30
  -9   1   0   13.40    2.80
  11  -1   0   66.99    6.60
  11  -1   0   76.49    7.30
 -11  -1   0   55.69    6.30
 -11  -1   0   59.49    8.80
  11  -1   0   60.69    8.40
  11  -1   0   60.99    7.80
 -11   1   0   72.99    7.70
 -11   1   0   76.59    9.10
  11   1   0   51.49    6.70
  11   1   0   55.59    7.00
  11   1   0   54.49    7.70
  11   1   0   51.99    6.70
  13  -1   0   16.60    4.60
  13  -1   0   12.50    4.00
 -13  -1   0   12.20    3.80
  13  -1   0   17.30    3.90
 -13  -1   0   21.90    5.00
  13  -1   0   19.20    5.20
 -13  -1   0   13.40    4.90
  13   1   0   13.20    4.50
 -13   1   0   12.60    4.50
  13   1   0   13.40    4.30
  13   1   0   12.50    4.40
  13   1   0   20.90    4.60
 -13   1   0    9.00    3.50
 -13   1   0   13.20    4.20
 -13   1   0   16.00    3.70
  15  -1   0  200.78   14.60
 -15  -1   0  183.38   16.00
 -15  -1   0  180.18   12.20
 -15  -1   0  190.68   14.30
  15  -1   0  198.68   13.80
  15  -1   0  188.18   12.80
 -15   1   0  201.48   12.40
 -15   1   0  206.88   14.20
  15   1   0  172.18   12.90
  15   1   0  195.98   13.10
 -15   1   0  186.88   12.60
  15   1   0  192.08   14.00
 -15   1   0  184.48   15.00
  15   1   0  190.68   12.80
  17  -1   0  429.36   21.00
 -17  -1   0  462.65   25.00
 -17  -1   0  425.56   22.40
 -17  -1   0  423.96   19.90
  17  -1   0  452.65   22.90
  17  -1   0  455.25   22.00
  17   1   0  439.96   21.10
 -17   1   0  443.86   25.20
 -17   1   0  454.35   20.70
  17   1   0  447.06   22.40
 -17   1   0  416.96   19.80
  17   1   0  413.56   20.70
  17   1   0  428.76   21.00
 -17   1   0  423.46   22.10
 -19  -1   0 1021.90   40.60
  19  -1   0  983.50   35.80
  19  -1   0 1010.60   38.20
 -19  -1   0  985.30   37.50
  19  -1   0  987.40   36.90
 -19  -1   0  988.30   34.70
  19   1   0  987.60   35.30
 -19   1   0  970.20   34.70
 -19   1   0  981.10   40.70
 -19   1   0  956.40   37.10
  19   1   0  990.60   37.50
  19   1   0  914.31   35.70
  19   1   0  989.20   35.80
 -21  -1   0  146.59   14.80
  21  -1   0  134.79   18.50
 -21  -1   0  134.79   19.10
  21  -1   0  131.29   17.30
  21  -1   0  142.39   17.00
 -21  -1   0  139.99   16.50
  21   1   0  129.39   16.40
 -21   1   0  115.89   19.80
  21   1   0  142.19   16.50
 -21   1   0  139.59   15.00
 -21   1   0  134.49   17.20
  21   1   0  119.59   17.60
 -23  -1   0  467.95   30.30
  23  -1   0  475.55   28.10
 -23  -1   0  466.15   24.50
 -23  -1   0  476.15   27.40
  23  -1   0  461.55   29.50
  23  -1   0  493.45   27.20
 -23   1   0  487.75   28.10
  23   1   0  439.96   28.00
  23   1   0  467.75   26.60
  23   1   0  505.55   27.30
 -23   1   0  492.55   31.30
 -23   1   0  466.25   24.80
 -25  -1   0  187.78   18.50
  25  -1   0  183.18   22.60
  25  -1   0  207.88   22.10
 -25  -1   0  189.08   20.70
 -25  -1   0  212.98   24.10
  25  -1   0  164.88   22.70
 -25   1   0  209.08   21.20
 -25   1   0  175.58   18.80
  25   1   0  183.18   21.30
  25   1   0  198.18   21.40
  25   1   0  179.68   22.90
 -25   1   0  230.18   25.30
  27  -1   0  102.09   16.20
  27  -1   0   82.99   15.50
  27  -1   0  131.69   22.20
 -27  -1   0  118.29   17.60
 -27  -1   0  151.28   20.90
 -27  -1   0  127.89   22.60
 -27   1   0  151.98   20.60
 -27   1   0  142.99   24.30
  27   1   0   89.59   14.30
 -27   1   0   87.49   12.90
  27   1   0   94.49   16.60
  27   1   0  151.48   22.30
   0  -2   0 2298.27   56.79
   0  -2   0 2199.48   55.99
   0  -2   0 2243.88   56.89
   0  -2   0 2242.38   56.19
   0  -2   0 2296.97   56.29
   0   2   0 2229.38   56.69
   0   2   0 2296.67   57.49
   0   2   0 2188.48   56.09
   0   2   0 2284.17   57.09
   0   2   0 2265.37   56.19
   2  -2   0 1718.53   44.30
  -2  -2   0 1790.42   44.50
  -2  -2   0 1795.42   44.70
  -2  -2   0 1822.52   44.80
   2  -2   0 1694.43   45.10
   2  -2   0 1852.81   45.00
   2  -2   0 1721.03   45.70
  -2   2   0 1757.32   46.20
  -2   2   0 1693.03   45.20
  -2   2   0 1706.63   44.80
   2   2   0 1743.63   44.90
   2   2   0 1817.52   44.50
  -2   2   0 1690.23   44.00
   2   2   0 1757.22   44.40
   2   2   0 1757.82   45.20
  -4  -2   0 2188.58   53.89
  -4  -2   0 2135.09   53.59
  -4  -2   0 2181.28   54.49
  -4  -2   0 2168.78   53.79
   4  -2   0 2093.59   55.09
   4  -2   0 2201.18   54.69
   4  -2   0 2024.70   53.69
   4  -2   0 1993.10   54.09
  -4   2   0 2075.59   53.79
  -4   2   0 2045.80   55.49
   4   2   0 2070.79   53.49
  -4   2   0 2077.09   53.19
   4   2   0 2088.49   53.69
   4   2   0 2102.49   53.49
   4   2   0 2109.39   54.69
  -4   2   0 2043.60   55.39
  -6  -2   0  122.29    6.00
  -6  -2   0  121.69    7.00
  -6  -2   0  110.89    6.80
   6  -2   0  116.39    7.70
   6  -2   0  106.99    6.60
   6  -2   0  127.89    6.70
   6  -2   0  123.89    8.00
   6   2   0  107.09    5.30
   6   2   0  112.19    6.20
   6   2   0  112.19    6.70
   6   2   0  114.99    6.30
  -6   2   0  121.29    6.60
  -6   2   0  124.49    5.00
  -6   2   0  122.29    7.90
  -6   2   0  126.79    7.70
   6   2   0  122.29    6.00
   8  -2   0  582.94   20.20
  -8  -2   0  600.74   20.10
   8  -2   0  563.34   19.30
   8  -2   0  586.84   20.30
  -8  -2   0  602.14   18.70
   8  -2   0  567.74   19.00
  -8  -2   0  603.94   20.50
   8   2   0  617.74   18.80
   8   2   0  610.34   19.30
  -8   2   0  590.64   19.50
  -8   2   0  572.94   20.20
   8   2   0  619.74   20.00
   8   2   0  593.94   18.50
  -8   2   0  574.34   21.50
  10  -2   0 1157.78   35.50
 -10  -2   0 1308.07   38.40
  10  -2   0 1251.67   37.40
 -10  -2   0 1255.37   37.30
  10  -2   0 1108.19   36.00
  10  -2   0 1181.58   36.70
 -10  -2   0 1244.98   35.40
 -10   2   0 1184.38   38.80
  10   2   0 1249.77   35.40
 -10   2   0 1162.48   36.90
  10   2   0 1300.37   35.60
  10   2   0 1323.67   37.10
 -10   2   0 1211.38   36.50
  10   2   0 1271.87   36.20
  12  -2   0  607.04   22.90
 -12  -2   0  602.94   21.10
  12  -2   0  556.74   22.30
  12  -2   0  615.34   23.40
 -12  -2   0  612.44   23.10
  12  -2   0  600.44   21.60
 -12  -2   0  625.44   24.30
  12   2   0  615.44   21.50
 -12   2   0  596.14   25.10
 -12   2   0  602.54   22.60
  12   2   0  637.34   22.30
  12   2   0  619.84   21.70
  12   2   0  657.23   23.00
 -12   2   0  575.54   22.20
 -14  -2   0  715.93   27.70
  14  -2   0  656.63   25.50
  14  -2   0  612.74   23.80
 -14  -2   0  636.04   23.50
  14  -2   0  683.03   26.60
  14   2   0  650.13   24.20
 -14   2   0  581.24   27.00
 -14   2   0  662.63   25.50
  14   2   0  708.43   25.30
 -14   2   0  586.44   24.40
  14   2   0  712.73   25.80
  14   2   0  680.73   24.10
  16  -2   0  496.45   24.00
 -16  -2   0  502.75   22.90
 -16  -2   0  495.45   20.50
 -16  -2   0  513.35   24.90
  16  -2   0  481.95   22.80
  16  -2   0  480.05   21.30
  16   2   0  503.45   22.30
  16   2   0  497.65   22.40
  16   2   0  505.35   21.30
  16   2   0  501.05   21.30
 -16   2   0  457.65   24.50
 -16   2   0  470.05   20.70
 -16   2   0  477.05   22.60
 -16   2   0  458.15   21.60
  18  -2   0   44.30    9.40
  18  -2   0   42.60    9.30
 -18  -2   0   32.90    8.20
  18  -2   0   25.60    8.20
 -18  -2   0   39.10    6.90
 -18  -2   0   38.00    7.90
  18   2   0   36.40    8.40
  18   2   0   38.70    8.10
 -18   2   0   33.20    7.30
  18   2   0   36.90    7.60
 -18   2   0   36.10    9.00
  18   2   0   31.10    7.70
 -18   2   0   40.80    7.70
 -18   2   0   27.30    7.80
 -20  -2   0   42.80    8.90
 -20  -2   0   36.20    9.10
 -20  -2   0   46.20    7.80
  20  -2   0   42.30    9.80
  20  -2   0   39.00    8.80
  20  -2   0   44.70   10.50
 -20   2   0   38.60   10.00
  20   2   0   38.40    8.10
  20   2   0   40.10    9.30
 -20   2   0   35.90    7.60
  20   2   0   46.30    8.80
 -20   2   0   51.19    9.60
  20   2   0   35.40    9.00
 -22  -2   0   46.80    9.90
 -22  -2   0   38.30    9.70
  22  -2   0   49.30   11.20
 -22  -2   0   39.50    8.10
  22  -2   0   48.20   10.20
  22  -2   0   38.70   10.90
 -22   2   0   44.80    8.80
 -22   2   0   45.60   10.10
  22   2   0   42.60    9.80
  22   2   0   41.70   10.50
  22   2   0   46.30    9.90
 -22   2   0   44.30   10.90
  24  -2   0   23.20   11.40
 -24  -2   0   20.10    9.50
 -24  -2   0   18.30    9.00
 -24  -2   0   20.80    7.90
  24  -2   0   10.80   10.10
  24  -2   0   23.30   10.80
 -24   2   0   28.80    9.60
  24   2   0   17.60    9.30
 -24   2   0   34.50   11.10
  24   2   0   17.20   10.50
  24   2   0    4.30    9.30
 -24   2   0   18.00    8.30
 -26  -2   0   12.30    9.40
 -26  -2   0   21.00    9.50
  26  -2   0    1.50   10.60
  26  -2   0   12.50   11.50
  26  -2   0   21.00   11.90
 -26  -2   0   13.10    8.30
  26   2   0   22.00   10.40
  26   2   0    2.80   10.00
 -26   2   0   17.30   10.20
  26   2   0   -7.50   10.30
 -26   2   0    9.30   11.40
 -26   2   0    8.20    8.20
   1  -3   0 1305.17   34.30
  -1  -3   0 1291.77   34.10
  -1  -3   0 1341.27   34.60
   1  -3   0 1308.17   35.00
  -1  -3   0 1298.57   34.80
   1  -3   0 1290.97   35.10
   1  -3   0 1317.07   34.20
   1  -3   0 1302.87   33.90
   1   3   0 1309.77   34.00
  -1   3   0 1359.26   34.00
   1   3   0 1275.77   35.20
   1   3   0 1258.27   34.90
   1   3   0 1307.37   35.30
  -1   3   0 1301.97   34.30
  -1   3   0 1359.06   36.40
  -1   3   0 1338.87   34.50
  -1   3   0 1383.96   35.40
  -3  -3   0  480.05   14.20
  -3  -3   0  467.15   14.50
   3  -3   0  489.35   14.00
   3  -3   0  473.85   15.20
   3  -3   0  484.65   14.90
   3  -3   0  469.05   16.00
  -3  -3   0  467.85   14.40
   3   3   0  445.46   14.70
   3   3   0  463.85   15.20
   3   3   0  463.75   14.10
  -3   3   0  477.75   14.60
  -3   3   0  487.45   13.60
  -3   3   0  480.85   16.50
  -3   3   0  489.65   15.40
   3   3   0  467.25   14.10
   5  -3   0  263.07   10.90
  -5  -3   0  301.17   10.30
  -5  -3   0  302.27   10.80
  -5  -3   0  301.57    9.70
   5  -3   0  261.07   11.90
  -5  -3   0  286.67    9.90
   5  -3   0  266.37   10.00
   5  -3   0  290.07   11.40
   5   3   0  307.47   11.50
   5   3   0  289.67   10.00
  -5   3   0  253.57   11.80
  -5   3   0  268.87    9.70
  -5   3   0  279.27   11.70
   5   3   0  280.37   10.10
   5   3   0  296.37   10.40
  -5   3   0  268.47   10.00
  -7  -3   0 2311.87   60.09
  -7  -3   0 2415.36   60.79
   7  -3   0 2150.08   60.39
  -7  -3   0 2411.56   61.69
   7  -3   0 2395.36   62.19
   7  -3   0 2183.08   60.89
   7  -3   0 2293.77   62.59
  -7  -3   0 2349.76   60.39
   7   3   0 2415.96   60.19
  -7   3   0 2115.99   58.69
   7   3   0 2362.16   60.09
   7   3   0 2374.86   61.99
  -7   3   0 2175.68   62.89
  -7   3   0 2275.17   60.59
   7   3   0 2336.57   60.49
  -7   3   0 2246.88   62.89
  -9  -3   0 2408.16   63.39
   9  -3   0 2189.58   62.19
  -9  -3   0 2384.76   61.99
   9  -3   0 2127.09   62.09
   9  -3   0 2318.77   64.39
  -9  -3   0 2384.86   63.59
   9  -3   0 2324.57   64.09
  -9   3   0 2278.57   65.59
  -9   3   0 2288.77   62.49
   9   3   0 2434.06   63.99
   9   3   0 2368.86   61.69
  -9   3   0 2258.17   64.39
   9   3   0 2400.66   62.39
  -9   3   0 2180.88   59.39
   9   3   0 2382.96   61.69
   9   3   0 2492.45   61.19
  11  -3   0 2777.72   74.69
  11  -3   0 2619.94   72.39
 -11  -3   0 2712.23   73.89
 -11  -3   0 2774.02   74.29
  11  -3   0 2588.14   72.79
  11  -3   0 2619.64   74.09
 -11  -3   0 2725.73   71.79
 -11   3   0 2683.43   73.09
 -11   3   0 2675.53   74.59
 -11   3   0 2570.24   75.89
  11   3   0 2732.73   73.99
  11   3   0 2799.02   72.09
  11   3   0 2714.83   72.59
  11   3   0 2701.33   71.69
  13  -3   0 1964.50   58.89
  13  -3   0 1920.11   56.59
  13  -3   0 1925.91   57.29
 -13  -3   0 2053.39   58.99
 -13  -3   0 2023.10   58.29
  13  -3   0 1981.60   58.59
 -13  -3   0 2012.10   55.89
  13   3   0 2064.29   56.29
 -13   3   0 1917.81   57.79
 -13   3   0 1956.40   57.29
  13   3   0 2035.20   55.89
 -13   3   0 1926.81   60.69
  13   3   0 2044.00   58.39
  13   3   0 2059.89   57.09
  15  -3   0  340.97   19.20
 -15  -3   0  333.57   16.20
  15  -3   0  319.37   17.60
  15  -3   0  348.37   19.80
 -15  -3   0  337.67   17.90
 -15  -3   0  366.76   19.40
  15   3   0  333.37   16.70
 -15   3   0  315.87   17.70
 -15   3   0  324.47   19.90
  15   3   0  356.66   17.80
  15   3   0  313.17   16.90
  15   3   0  340.57   18.50
 -15   3   0  351.16   18.30
 -17  -3   0   20.60    5.50
 -17  -3   0   22.10    6.30
  17  -3   0   16.20    8.00
 -17  -3   0   20.80    6.50
  17  -3   0   27.40    8.20
  17  -3   0    4.50    6.90
  17   3   0   22.70    6.80
 -17   3   0   14.50    6.30
 -17   3   0   19.10    6.60
 -17   3   0   22.70    6.10
  17   3   0   22.20    6.80
  17   3   0    9.30    6.50
  17   3   0   25.40    6.80
  19  -3   0   -9.60    6.40
  19  -3   0    0.30    7.60
 -19  -3   0    2.10    4.90
  19  -3   0   -6.20    7.10
 -19  -3   0   -7.50    5.50
 -19  -3   0   -9.20    5.40
 -19   3   0   -1.10    5.40
 -19   3   0   -5.60    5.80
 -19   3   0    2.40    5.90
  19   3   0   -5.60    5.40
  19   3   0   -8.30    5.90
 -19   3   0   -0.70    5.10
  21  -3   0  145.89   17.10
 -21  -3   0  146.39   14.90
 -21  -3   0  150.78   17.40
 -21  -3   0  138.09   18.40
  21  -3   0  120.69   19.20
  21  -3   0  129.19   19.30
 -21   3   0  150.08   15.20
  21   3   0  110.69   16.80
  21   3   0  120.19   16.50
 -21   3   0  150.58   16.50
  21   3   0  147.59   16.60
 -21   3   0  143.99   19.20
  21   3   0  141.39   17.10
 -23  -3   0   34.60    9.90
 -23  -3   0   41.10    8.40
 -23  -3   0   29.20    9.20
  23  -3   0   36.20   11.90
  23  -3   0   40.80   11.60
  23  -3   0   37.10   10.30
 -23   3   0   39.70    9.90
 -23   3   0   35.60   10.70
  23   3   0   43.70   10.20
  23   3   0   26.30   10.80
  23   3   0   42.30   10.30
 -23   3   0   31.90    8.40
 -25  -3   0   16.00    8.10
 -25  -3   0    9.90    8.90
  25  -3   0    3.50   11.10
  25  -3   0   16.50   10.90
 -25  -3   0    8.80    8.80
  25  -3   0    4.10    9.80
 -25   3   0    8.80    7.80
 -25   3   0    5.50   10.10
  25   3   0    7.60    9.40
  25   3   0    0.20    9.30
 -25   3   0    7.60    8.80
  25   3   0   -3.30    9.60
  27  -3   0  -11.00   10.60
  27  -3   0    1.40   11.00
 -27  -3   0   -1.00    7.90
  27  -3   0   -0.70   16.20
  27   3   0    9.40   10.40
 -27   3   0    5.80   13.50
  27   3   0   -2.40   10.30
 -27   3   0   -2.30    9.90
   0  -4   0 2534.95   64.79
   0  -4   0 2512.25   66.19
   0  -4   0 2599.14   65.29
   0  -4   0 2568.24   65.09
   0  -4   0 2550.44   66.19
   0   4   0 2578.84   66.19
   0   4   0 2638.94   67.79
   0   4   0 2595.44   64.99
   0   4   0 2618.14   66.99
   0   4   0 2515.55   64.79
  -2  -4   0 1204.18   32.40
   2  -4   0 1205.98   33.70
   2  -4   0 1191.48   31.60
   2  -4   0 1199.38   32.10
  -2  -4   0 1160.38   32.60
  -2  -4   0 1185.48   32.10
   2  -4   0 1213.18   33.20
  -2   4   0 1219.88   32.60
   2   4   0 1145.09   33.00
   2   4   0 1143.79   31.70
  -2   4   0 1246.88   32.20
  -2   4   0 1234.78   33.20
  -2   4   0 1247.08   35.00
   2   4   0 1136.29   33.30
   2   4   0 1122.89   32.90
   4  -4   0  458.45   15.10
   4  -4   0  427.46   16.30
  -4  -4   0  436.96   14.20
   4  -4   0  440.46   15.40
  -4  -4   0  442.96   14.70
   4  -4   0  454.35   14.00
  -4  -4   0  423.26   14.40
   4   4   0  418.06   15.00
   4   4   0  427.96   14.00
  -4   4   0  457.65   15.70
  -4   4   0  447.86   16.90
   4   4   0  423.76   14.10
  -4   4   0  451.75   13.40
  -4   4   0  449.06   14.60
   4   4   0  423.76   15.40
  -6  -4   0  567.74   16.10
   6  -4   0  460.25   16.50
   6  -4   0  487.45   18.00
   6  -4   0  508.35   19.50
  -6  -4   0  557.64   17.60
   6  -4   0  519.65   18.30
  -6  -4   0  525.15   16.80
  -6  -4   0  565.44   18.00
  -6   4   0  488.15   19.70
  -6   4   0  499.55   16.80
   6   4   0  582.54   18.00
  -6   4   0  480.05   16.50
   6   4   0  564.24   17.00
  -6   4   0  495.35   19.00
   6   4   0  551.54   17.20
   6   4   0  582.24   19.00
  -8  -4   0  928.11   28.00
  -8  -4   0  922.71   27.40
   8  -4   0  927.21   30.90
  -8  -4   0  922.51   28.90
  -8  -4   0  941.81   27.60
   8  -4   0  927.81   29.20
   8  -4   0  921.31   27.80
   8  -4   0  958.60   30.40
   8   4   0  927.21   27.90
  -8   4   0  910.11   26.40
   8   4   0  910.91   29.50
  -8   4   0  941.91   31.00
  -8   4   0  928.71   27.90
   8   4   0  919.31   27.40
  -8   4   0  931.31   30.90
   8   4   0  941.91   28.10
  10  -4   0 2065.69   58.89
 -10  -4   0 2096.19   56.49
 -10  -4   0 2058.99   55.69
  10  -4   0 1944.21   55.99
 -10  -4   0 2087.09   56.09
 -10  -4   0 2065.49   57.49
  10  -4   0 1944.91   56.69
  10  -4   0 2024.20   59.29
 -10   4   0 2001.30   56.29
  10   4   0 2092.39   55.59
  10   4   0 2057.29   55.59
 -10   4   0 2006.20   53.59
 -10   4   0 2032.30   59.29
  10   4   0 2087.19   56.39
  10   4   0 2113.89   58.49
 -10   4   0 2031.00   60.09
 -12  -4   0 1943.61   56.59
  12  -4   0 1969.40   58.39
 -12  -4   0 1998.00   55.99
  12  -4   0 1939.51   55.79
  12  -4   0 1891.91   55.69
 -12  -4   0 1953.10   54.59
 -12  -4   0 1953.80   54.39
  12  -4   0 1940.41   57.99
  12   4   0 1973.60   53.49
 -12   4   0 1926.31   59.29
  12   4   0 1986.80   57.59
 -12   4   0 1915.11   55.59
  12   4   0 1994.40   54.59
 -12   4   0 1955.30   58.19
  12   4   0 1980.20   55.49
 -14  -4   0 1125.59   37.20
 -14  -4   0 1085.99   37.20
 -14  -4   0 1129.19   35.50
  14  -4   0 1103.79   36.70
  14  -4   0 1117.99   39.00
  14  -4   0 1096.39   39.30
  14  -4   0 1161.48   37.00
  14   4   0 1110.89   38.20
  14   4   0 1139.79   36.60
 -14   4   0 1126.49   36.80
 -14   4   0 1145.59   38.30
 -14   4   0 1140.09   40.60
  14   4   0 1145.49   35.70
 -16  -4   0    1.10    4.20
 -16  -4   0    1.60    4.60
 -16  -4   0    5.30    4.80
  16  -4   0   -9.80    5.70
  16  -4   0    4.80    6.70
  16  -4   0   -3.20    4.60
  16  -4   0    8.50    7.50
  16   4   0  -10.10    4.90
 -16   4   0    2.60    5.00
 -16   4   0    4.00    5.10
  16   4   0    0.90    5.10
  16   4   0   -3.90    5.00
 -16   4   0    5.10    4.80
 -18  -4   0   -1.90    5.40
  18  -4   0  -10.40    6.40
  18  -4   0    2.30    7.60
 -18  -4   0   -3.70    4.90
 -18  -4   0    0.50    4.90
  18  -4   0   -0.40    8.00
  18   4   0   -9.50    6.00
  18   4   0   -4.10    5.70
 -18   4   0   -2.70    5.20
 -18   4   0   -1.10    6.00
 -18   4   0    0.90    5.20
 -20  -4   0  198.98   18.50
 -20  -4   0  213.18   16.30
  20  -4   0  231.58   21.50
  20  -4   0  232.78   18.70
 -20  -4   0  200.48   18.20
  20  -4   0  227.78   21.40
  20   4   0  173.48   18.60
 -20   4   0  222.38   21.70
 -20   4   0  222.18   18.50
 -20   4   0  233.28   18.00
  20   4   0  198.68   17.40
  20   4   0  163.88   18.60
  22  -4   0  188.98   22.30
 -22  -4   0  166.68   18.70
 -22  -4   0  178.68   16.30
  22  -4   0  205.58   19.40
 -22  -4   0  155.78   19.10
  22  -4   0  194.38   21.60
 -22   4   0  188.08   16.70
 -22   4   0  190.18   22.00
  22   4   0  164.08   17.90
 -22   4   0  185.58   17.70
  24  -4   0  129.99   21.80
 -24  -4   0  129.99   18.70
  24  -4   0  145.49   22.50
 -24  -4   0  136.79   16.80
  24  -4   0  164.28   19.70
 -24   4   0  154.68   18.10
  24   4   0  135.89   18.40
 -24   4   0  164.38   22.40
 -24   4   0  135.39   16.20
  26  -4   0  -11.30   10.80
  26  -4   0    6.80   11.10
 -26  -4   0   -7.30    8.90
  26  -4   0    1.80    9.80
 -26  -4   0    0.80    7.30
  26   4   0   -7.00    9.10
  26   4   0   -3.10    9.70
 -26   4   0   -0.40    8.90
 -26   4   0   -2.00    7.40
 -26   4   0   -3.60    9.20
   1  -5   0  105.99    6.00
   1  -5   0  103.79    5.80
   1  -5   0  108.49    7.10
   1  -5   0  110.89    6.90
  -1  -5   0  102.59    6.80
  -1  -5   0  106.69    6.60
  -1  -5   0  105.79    6.00
  -1  -5   0  103.19    5.80
   1  -5   0  106.39    5.60
   1   5   0  104.29    6.50
   1   5   0  105.29    7.00
  -1   5   0  114.39    7.20
  -1   5   0  102.49    5.70
   1   5   0  103.49    5.70
  -1   5   0  109.69    6.30
  -1   5   0   99.99    7.80
  -1   5   0  113.19    5.90
   1   5   0  104.29    7.30
  -3  -5   0   33.20    4.50
   3  -5   0   34.50    5.80
  -3  -5   0   29.00    4.80
   3  -5   0   22.20    3.40
   3  -5   0   35.40    4.50
   3  -5   0   28.60    3.70
  -3  -5   0   33.00    4.60
  -3   5   0   26.00    4.50
   3   5   0   37.80    4.90
   3   5   0   37.80    4.10
  -3   5   0   18.50    3.10
  -3   5   0   21.20    3.80
  -3   5   0   20.70    3.80
   3   5   0   36.60    5.00
  -5  -5   0   10.60    3.20
   5  -5   0   19.80    3.60
  -5  -5   0   19.50    3.20
   5  -5   0   18.40    4.30
   5  -5   0   15.70    2.70
  -5  -5   0   17.20    3.40
   5  -5   0   20.90    3.80
  -5   5   0   12.90    3.40
   5   5   0   17.30    3.10
   5   5   0   16.30    3.40
   5   5   0   19.90    3.00
  -5   5   0    9.60    3.80
  -5   5   0   14.20    3.10
   5   5   0   19.60    3.20
   7  -5   0  144.49   11.90
  -7  -5   0  142.79    9.60
   7  -5   0  165.18   10.90
   7  -5   0  174.48    8.90
   7  -5   0  162.08   10.70
  -7  -5   0  157.58    9.50
  -7  -5   0  179.78    9.10
  -7   5   0  168.38    8.90
   7   5   0  173.48    9.80
  -7   5   0  161.48   11.90
   7   5   0  171.48    9.30
  -7   5   0  165.98   11.10
   7   5   0  171.68   10.60
  -7   5   0  177.88    8.90
   7   5   0  177.98    9.20
   9  -5   0  252.27   15.10
   9  -5   0  266.27   12.10
  -9  -5   0  224.58   10.50
  -9  -5   0  242.48   12.00
   9  -5   0  238.48   15.50
  -9  -5   0  252.27   11.60
  -9  -5   0  244.98   12.60
   9  -5   0  240.38   13.90
   9   5   0  246.08   13.60
  -9   5   0  255.77   12.10
   9   5   0  249.78   11.60
  -9   5   0  291.07   15.40
  -9   5   0  279.27   15.20
  -9   5   0  269.97   10.90
   9   5   0  244.88   12.30
   9   5   0  245.88   12.20
 -11  -5   0   45.30    6.40
  11  -5   0   26.00    7.00
  11  -5   0   25.40    6.30
 -11  -5   0   29.30    4.70
 -11  -5   0   43.00    6.80
  11  -5   0   31.10    7.50
 -11  -5   0   48.10    7.90
  11  -5   0   54.79    7.40
  11   5   0   30.90    5.50
  11   5   0   52.19    7.80
 -11   5   0   61.69    9.50
  11   5   0   41.70    6.60
  11   5   0   43.00    7.20
 -11   5   0   55.39    9.60
 -11   5   0   46.10    7.40
  13  -5   0  205.78   17.60
 -13  -5   0  194.68   13.40
  13  -5   0  233.78   13.50
  13  -5   0  197.98   14.40
 -13  -5   0  187.58   12.30
 -13  -5   0  195.78   12.50
  13  -5   0  200.98   17.00
 -13  -5   0  208.98   12.50
  13   5   0  209.98   13.40
 -13   5   0  212.18   13.10
 -13   5   0  225.08   15.90
 -13   5   0  216.18    9.80
 -13   5   0  242.68   15.70
  13   5   0  198.28   12.00
  13   5   0  162.18   12.00
  13   5   0  206.18   14.40
  15  -5   0   89.49   15.20
  15  -5   0   91.79   11.40
  15  -5   0   91.99   13.00
 -15  -5   0   80.79   10.50
  15  -5   0  100.59   16.70
 -15  -5   0   76.49   11.40
 -15  -5   0   76.89   10.60
  15   5   0   53.49    8.10
 -15   5   0   83.19   13.90
 -15   5   0   85.39   11.10
 -15   5   0   98.29   12.70
  15   5   0   74.89   12.20
 -17  -5   0   -0.60    5.10
  17  -5   0   14.20    9.00
  17  -5   0    4.00    6.50
 -17  -5   0   -0.90    4.70
 -17  -5   0    0.00    5.50
  17  -5   0   -7.20    5.70
 -17  -5   0   -0.40    5.20
  17  -5   0    6.30    7.90
  17   5   0   -7.10    5.50
 -17   5   0    3.90    6.30
 -17   5   0    7.10    5.60
 -17   5   0    2.70    5.80
  19  -5   0   25.10   10.00
  19  -5   0   37.80    9.00
 -19  -5   0   25.90    6.80
 -19  -5   0   17.90    7.30
 -19  -5   0   24.30    7.60
 -19  -5   0   32.90    7.10
  19  -5   0   22.30   10.00
 -19   5   0   25.10    7.70
 -19   5   0   30.60    8.00
 -19   5   0   33.50    8.90
  19   5   0   29.10    7.60
  21  -5   0   40.10   11.80
 -21  -5   0   35.10    8.30
  21  -5   0   61.69   10.70
 -21  -5   0   38.50    8.10
  21  -5   0   47.10   11.80
 -21  -5   0   41.00    9.30
 -21   5   0   44.70    9.50
 -21   5   0   49.20   10.90
  21   5   0   31.50    9.20
 -21   5   0   49.10    9.40
  23  -5   0   37.80   12.40
 -23  -5   0   26.20    8.00
 -23  -5   0   13.70    8.90
  23  -5   0   32.90   12.00
 -23  -5   0   26.20    8.30
  23  -5   0   36.80    9.90
  23   5   0   15.40    9.70
 -23   5   0   31.20    8.80
  23   5   0   23.70   10.10
  23   5   0   15.40    8.90
 -23   5   0   34.50   11.10
 -23   5   0   32.10    8.20
 -25  -5   0    5.70    8.80
  25  -5   0    7.50   11.50
  25  -5   0   41.80   11.00
  25  -5   0   33.70   13.10
 -25  -5   0   22.90    8.60
 -25  -5   0   30.60    9.00
  25   5   0   24.10    9.90
  25   5   0   14.60   10.10
 -25   5   0   26.40   11.70
 -25   5   0   33.30    8.70
 -25   5   0   26.90    9.60
   0  -6   0  257.07    9.80
   0  -6   0  259.87   10.60
   0  -6   0  271.97   10.30
   0  -6   0  264.67   11.90
   0  -6   0  271.67   12.00
   0   6   0  275.37   10.40
   0   6   0  273.67   13.40
   0   6   0  270.97   11.60
   0   6   0  260.67    9.80
   0   6   0  270.37   12.50
  -2  -6   0  349.77   12.70
   2  -6   0  329.27   13.90
   2  -6   0  333.87   12.10
  -2  -6   0  374.46   13.90
  -2  -6   0  349.77   13.90
  -2  -6   0  344.77   12.80
   2  -6   0  337.97   12.70
   2  -6   0  345.67   14.60
  -2   6   0  328.27   14.10
   2   6   0  361.46   14.80
  -2   6   0  335.57   13.00
  -2   6   0  362.86   12.60
   2   6   0  367.86   15.00
   2   6   0  364.26   12.70
  -2   6   0  336.37   13.10
  -2   6   0  331.57   15.90
   2   6   0  346.37   14.00
  -4  -6   0   17.80    3.50
   4  -6   0   14.80    2.80
   4  -6   0   24.40    4.90
  -4  -6   0   13.80    3.20
   4  -6   0   15.10    3.40
  -4  -6   0   11.10    3.60
   4  -6   0   14.00    3.80
  -4   6   0   12.30    3.40
  -4   6   0   14.70    3.40
  -4   6   0   15.90    2.90
  -4   6   0   10.10    3.90
   4   6   0   18.60    3.10
   4   6   0   13.40    3.40
   4   6   0   14.80    3.70
   4   6   0   13.70    3.20
  -6  -6   0  134.59    9.10
   6  -6   0  139.09    7.90
  -6  -6   0  149.49    8.80
   6  -6   0  129.79   11.30
   6  -6   0  138.09    9.70
   6  -6   0  126.99    9.90
  -6  -6   0  125.59    8.90
  -6   6   0  132.49    9.90
   6   6   0  145.39    8.50
   6   6   0  151.48    9.80
   6   6   0  140.19    8.60
   6   6   0  143.39   10.00
  -6   6   0  126.69    8.80
  -6   6   0  125.89   11.30
   8  -6   0  656.03   21.90
  -8  -6   0  653.43   22.20
  -8  -6   0  687.73   23.20
  -8  -6   0  688.23   23.20
   8  -6   0  658.93   26.00
   8  -6   0  647.64   24.10
   8  -6   0  632.84   23.90
  -8   6   0  641.24   26.00
  -8   6   0  678.63   25.20
   8   6   0  703.43   22.50
   8   6   0  692.13   25.10
   8   6   0  688.73   22.80
  -8   6   0  657.73   22.00
   8   6   0  679.83   23.90
  -8   6   0  668.23   22.00
 -10  -6   0  236.78   12.60
  10  -6   0  217.18   16.40
  10  -6   0  212.38   14.00
  10  -6   0  253.97   16.20
 -10  -6   0  274.47   11.30
 -10  -6   0  251.97   13.20
 -10  -6   0  263.17   13.90
  10  -6   0  232.18   11.90
  10   6   0  274.87   15.10
 -10   6   0  235.68   11.20
 -10   6   0  232.58   15.20
  10   6   0  251.47   12.90
 -10   6   0  241.98   12.20
  10   6   0  283.77   13.60
  10   6   0  250.67   13.20
 -10   6   0  243.38   15.20
 -12  -6   0  594.14   23.30
  12  -6   0  596.94   26.50
 -12  -6   0  600.74   20.70
  12  -6   0  549.45   26.40
 -12  -6   0  522.25   21.60
 -12  -6   0  567.74   22.40
  12  -6   0  530.35   21.50
  12  -6   0  542.55   23.30
 -12   6   0  570.84   22.00
 -12   6   0  578.84   25.70
 -12   6   0  561.64   19.50
  12   6   0  620.14   25.10
  12   6   0  535.05   21.90
  12   6   0  636.04   22.90
  12   6   0  581.94   22.60
 -12   6   0  581.34   25.80
 -14  -6   0  126.49   11.70
  14  -6   0  116.99   13.90
 -14  -6   0  140.29   13.20
  14  -6   0  148.39   18.30
  14  -6   0  112.89   11.80
 -14  -6   0  125.19   12.20
  14  -6   0  130.59   17.00
  14   6   0  134.39   14.50
  14   6   0  148.99   16.00
  14   6   0  102.79   13.30
 -14   6   0  135.39   12.00
 -14   6   0  135.19   15.00
 -14   6   0  143.79   14.30
  16  -6   0    8.50    5.70
  16  -6   0    4.70    9.00
 -16  -6   0    3.90    5.60
 -16  -6   0    9.90    6.00
  16  -6   0   10.80    8.90
  16  -6   0   14.90    7.10
 -16  -6   0    6.80    6.30
 -16   6   0   15.20    7.20
 -16   6   0   19.00    6.80
  16   6   0    5.00    6.20
  16   6   0    5.60    7.40
  16   6   0    1.90    6.70
 -16   6   0   13.50    6.00
  18  -6   0   12.40    9.90
  18  -6   0    8.00    7.40
 -18  -6   0   10.50    6.50
 -18  -6   0    3.00    6.50
  18  -6   0    5.00    6.20
  18  -6   0    4.90    9.80
 -18  -6   0   11.70    5.60
 -18   6   0   12.10    6.60
  18   6   0    0.20    7.50
  18   6   0   17.70    6.60
 -18   6   0    1.80    6.40
 -18   6   0    6.00    7.60
  18   6   0   -8.70    6.60
 -20  -6   0    7.80    7.10
 -20  -6   0   12.50    6.80
  20  -6   0    3.20    8.40
  20  -6   0    9.10   10.50
 -20  -6   0   10.70    6.70
  20  -6   0    5.80   10.00
  20   6   0    2.70    8.20
 -20   6   0   18.90    7.40
 -20   6   0    7.40    8.40
  20   6   0    7.70    7.90
 -20   6   0    6.70    7.70
  20   6   0   17.00    7.40
 -22  -6   0   41.60    8.90
  22  -6   0   37.20   10.70
 -22  -6   0   26.10    8.10
  22  -6   0   43.70   12.80
 -22  -6   0   38.30    9.40
  22  -6   0   33.90   11.70
  22   6   0   32.30    9.80
 -22   6   0   16.40   10.60
 -22   6   0   38.70    9.60
  22   6   0   32.10   10.70
  22   6   0   37.90    9.10
 -24  -6   0    2.70    7.30
  24  -6   0   11.50    9.70
  24  -6   0    9.50   13.50
 -24  -6   0    2.00    8.10
 -24  -6   0    8.40    7.60
  24  -6   0    4.90   11.40
 -24   6   0   -6.30   10.00
  24   6   0    4.60    8.30
 -24   6   0    2.60    8.20
  24   6   0   -3.80    9.20
  24   6   0   -3.00    8.80
  -1  -7   0 1153.18   33.40
  -1  -7   0 1178.98   35.30
   1  -7   0 1164.18   33.20
   1  -7   0 1176.88   34.00
   1  -7   0 1181.68   35.70
   1  -7   0 1151.98   35.70
  -1  -7   0 1149.98   33.70
  -1  -7   0 1187.08   35.50
  -1   7   0 1187.78   33.60
  -1   7   0 1212.28   38.30
   1   7   0 1211.88   33.60
  -1   7   0 1259.67   33.80
   1   7   0 1179.48   36.50
  -1   7   0 1208.88   35.10
   1   7   0 1210.48   37.70
  -1   7   0 1173.48   36.10
   1   7   0 1204.38   35.80
  -3  -7   0  165.38    9.10
  -3  -7   0  143.69    8.80
  -3  -7   0  147.59    9.90
   3  -7   0  169.38    9.20
   3  -7   0  168.58   10.60
  -3  -7   0  150.38    9.60
   3  -7   0  166.28   11.30
   3  -7   0  179.28    8.40
   3   7   0  143.49   10.40
  -3   7   0  175.48    9.20
   3   7   0  145.79    9.90
  -3   7   0  169.38   12.30
   3   7   0  159.98    8.80
  -3   7   0  170.28    9.50
  -3   7   0  171.18   10.40
   3   7   0  141.89   10.40
   5  -7   0  270.77   12.90
   5  -7   0  273.67   15.30
  -5  -7   0  275.47   12.60
  -5  -7   0  293.97   13.40
   5  -7   0  256.67   11.30
   5  -7   0  255.57   13.90
  -5  -7   0  310.47   12.70
  -5   7   0  268.47   11.50
   5   7   0  279.47   13.30
   5   7   0  294.57   14.50
   5   7   0  293.47   14.40
   5   7   0  284.47   12.10
  -5   7   0  261.57   13.40
  -5   7   0  268.07   13.30
  -5   7   0  258.77   15.60
   7  -7   0  622.84   23.20
  -7  -7   0  653.13   22.30
  -7  -7   0  677.83   23.30
   7  -7   0  606.14   21.10
  -7  -7   0  694.33   22.80
   7  -7   0  604.74   23.70
   7  -7   0  625.24   25.40
  -7   7   0  620.34   22.30
   7   7   0  670.33   22.20
   7   7   0  663.53   22.20
   7   7   0  696.63   25.10
  -7   7   0  601.64   26.00
   7   7   0  690.13   24.40
  -7   7   0  598.94   24.10
   9  -7   0 1533.95   47.10
   9  -7   0 1549.05   47.10
   9  -7   0 1525.95   44.50
   9  -7   0 1541.25   49.40
  -9  -7   0 1589.04   46.30
  -9  -7   0 1553.64   45.80
  -9  -7   0 1561.94   45.30
  -9   7   0 1568.74   44.70
   9   7   0 1586.24   45.40
  -9   7   0 1535.95   44.60
  -9   7   0 1528.95   50.09
  -9   7   0 1529.25   48.60
   9   7   0 1551.84   45.10
   9   7   0 1592.44   47.20
   9   7   0 1551.24   48.30
 -11  -7   0 1810.72   53.69
 -11  -7   0 1783.22   52.99
  11  -7   0 1830.42   54.99
  11  -7   0 1797.22   52.59
 -11  -7   0 1860.61   54.29
  11  -7   0 1786.62   56.29
  11  -7   0 1815.22   58.29
  11   7   0 1851.21   56.89
  11   7   0 1839.52   53.09
  11   7   0 1896.31   53.89
 -11   7   0 1896.41   58.79
 -11   7   0 1825.62   52.79
  11   7   0 1891.11   55.09
 -11   7   0 1839.32   51.59
 -11   7   0 1885.61   57.89
 -13  -7   0 1336.47   42.90
  13  -7   0 1353.46   47.70
  13  -7   0 1424.26   43.20
  13  -7   0 1431.86   45.30
  13  -7   0 1359.46   48.90
 -13  -7   0 1384.36   43.70
 -13  -7   0 1388.36   44.60
  13   7   0 1315.57   42.90
  13   7   0 1396.76   44.20
 -13   7   0 1452.65   48.30
  13   7   0 1394.66   44.60
 -13   7   0 1383.96   43.20
 -13   7   0 1458.65   48.50
 -13   7   0 1458.05   41.10
  13   7   0 1347.27   47.00
  15  -7   0  369.76   18.80
  15  -7   0  316.97   24.60
 -15  -7   0  298.47   19.60
  15  -7   0  351.86   20.90
 -15  -7   0  339.57   18.20
  15  -7   0  322.97   24.50
 -15  -7   0  328.37   18.80
  15   7   0  311.07   21.50
  15   7   0  338.97   18.50
 -15   7   0  395.86   23.60
  15   7   0  316.37   19.40
 -15   7   0  354.96   18.50
 -15   7   0  383.26   22.40
 -17  -7   0    9.30    5.50
  17  -7   0   12.50    5.80
  17  -7   0   -2.70    7.10
 -17  -7   0   -7.80    5.60
  17  -7   0   -3.20    9.20
  17  -7   0  -13.30    9.20
  17   7   0    0.80    5.60
 -17   7   0    1.90    6.40
 -17   7   0    8.80    5.80
  17   7   0   -4.10    6.80
  17   7   0   -6.30    6.10
 -17   7   0    7.70    7.40
 -19  -7   0   16.50    7.60
 -19  -7   0   23.20    7.80
  19  -7   0   19.50   11.20
  19  -7   0   15.30    9.00
 -19  -7   0   18.70    6.80
  19  -7   0   14.70   11.30
  19  -7   0   25.80    7.30
  19   7   0   23.50    7.60
 -19   7   0   22.40    9.40
 -19   7   0   14.00    8.40
  19   7   0   29.10    9.80
 -19   7   0   24.10    7.70
  19   7   0   26.30    8.50
 -21  -7   0   97.59   15.80
 -21  -7   0   93.19   14.60
 -21  -7   0   64.69   10.40
  21  -7   0   75.59   14.70
  21  -7   0   77.99   12.60
  21   7   0  100.79   17.00
 -21   7   0   66.19   10.70
 -21   7   0   63.59   11.90
 -21   7   0   66.89   13.40
  21   7   0  105.19   18.30
  21   7   0   89.49   15.10
 -23  -7   0    4.10    8.10
 -23  -7   0   12.50    7.70
 -23  -7   0   19.70    8.80
  23  -7   0   13.70   12.00
  23  -7   0    9.50   10.30
  23   7   0    3.30    8.00
  23   7   0    7.70    9.20
 -23   7   0    1.30    8.80
 -23   7   0    5.10   11.00
  23   7   0   -2.70    9.40
 -25  -7   0   14.60    8.90
 -25  -7   0   13.60    9.00
  25   7   0   18.50   11.20
  25   7   0   12.80   10.20
   0  -8   0  233.38   11.20
   0  -8   0  239.58   10.80
   0  -8   0  233.98   12.80
   0  -8   0  226.98   12.80
   0   8   0  242.48   13.10
   0   8   0  241.88   14.40
   0   8   0  247.98   12.40
   0   8   0  253.27   11.30
  -2  -8   0   47.60    7.10
  -2  -8   0   46.40    6.10
  -2  -8   0   50.09    6.50
   2  -8   0   48.00    7.90
   2  -8   0   46.90    6.40
   2  -8   0   43.50    6.20
   2  -8   0   50.19    5.90
  -2  -8   0   36.00    5.40
   2   8   0   52.09    7.10
   2   8   0   42.60    7.80
  -2   8   0   61.19    6.60
   2   8   0   42.70    7.30
  -2   8   0   54.19    6.80
  -2   8   0   56.99    8.80
   2   8   0   49.99    6.20
  -2   8   0   48.90    7.40
  -2   8   0   54.69    6.20
  -4  -8   0   68.19    7.70
  -4  -8   0   58.19    7.10
  -4  -8   0   63.59    8.30
   4  -8   0   53.19    6.30
   4  -8   0   43.30    6.30
   4  -8   0   41.40    7.00
   4  -8   0   51.29    7.60
  -4  -8   0   66.69    7.30
   4   8   0   64.69    8.80
  -4   8   0   51.49    8.40
   4   8   0   49.10    8.50
  -4   8   0   48.10    6.70
   4   8   0   69.39    8.40
   4   8   0   68.79    7.00
  -4   8   0   47.00    7.50
   6  -8   0  188.88   10.60
  -6  -8   0  218.28   12.20
   6  -8   0  187.78   12.70
  -6  -8   0  216.18   13.10
   6  -8   0  187.58   13.70
  -6  -8   0  215.08   12.20
   6  -8   0  195.68   14.80
   6   8   0  232.18   13.90
  -6   8   0  182.08   12.40
   6   8   0  224.48   12.00
   6   8   0  233.98   14.00
  -6   8   0  183.28   15.10
  -6   8   0  192.48   13.10
  -6   8   0  199.48   10.90
   6   8   0  211.38   13.00
   8  -8   0  999.40   30.80
  -8  -8   0  982.10   31.90
  -8  -8   0  976.90   32.00
  -8  -8   0  964.20   32.70
   8  -8   0  991.40   36.20
   8  -8   0  985.40   34.20
   8  -8   0  957.40   33.20
   8   8   0 1003.60   31.90
  -8   8   0  966.10   34.50
  -8   8   0  969.40   36.90
   8   8   0 1005.00   34.40
  -8   8   0 1025.20   32.40
   8   8   0  960.90   31.70
   8   8   0  980.70   34.90
  10  -8   0 1119.49   38.50
 -10  -8   0 1099.09   36.80
  10  -8   0 1125.09   41.40
  10  -8   0 1154.18   35.40
 -10  -8   0 1142.29   36.70
 -10  -8   0 1110.29   36.20
  10  -8   0 1136.99   38.70
 -10   8   0 1147.69   41.80
  10   8   0 1138.59   38.80
  10   8   0 1120.29   36.30
 -10   8   0 1172.58   35.60
 -10   8   0 1166.88   40.40
  10   8   0 1081.79   36.00
  10   8   0 1099.39   39.80
 -10   8   0 1134.09   35.50
 -12  -8   0 1096.59   37.30
 -12  -8   0 1060.19   36.90
  12  -8   0 1147.09   39.30
 -12  -8   0 1045.80   36.10
  12  -8   0 1059.89   40.40
  12  -8   0 1116.79   42.40
  12  -8   0 1189.68   36.40
 -12   8   0 1162.88   42.40
  12   8   0 1104.69   37.10
 -12   8   0 1171.98   35.20
  12   8   0 1010.20   40.10
  12   8   0 1064.59   36.40
 -12   8   0 1131.99   36.10
 -12   8   0 1173.68   41.70
  12   8   0 1086.79   38.90
 -14  -8   0  593.94   26.70
  14  -8   0  604.64   31.10
  14  -8   0  653.63   33.00
 -14  -8   0  645.64   25.70
  14  -8   0  690.13   28.70
 -14  -8   0  611.84   26.30
  14  -8   0  680.73   25.60
  14   8   0  590.64   29.80
 -14   8   0  646.74   25.50
  14   8   0  626.44   26.70
 -14   8   0  678.73   31.00
  14   8   0  638.04   25.80
 -14   8   0  645.84   30.50
  14   8   0  571.24   28.20
  16  -8   0   37.10   12.10
  16  -8   0   41.70    9.20
 -16  -8   0   44.30    7.50
 -16  -8   0   16.40    8.00
  16  -8   0   33.40   13.90
 -16  -8   0   35.10    8.10
 -16   8   0   43.80   10.00
  16   8   0   35.40    8.10
 -16   8   0   36.40    7.40
 -16   8   0   34.40    8.90
  16   8   0   29.10    9.10
  16   8   0   38.10    7.80
 -18  -8   0   14.80    6.70
  18  -8   0   10.20    8.20
 -18  -8   0    0.20    6.70
 -18  -8   0    2.90    6.80
  18  -8   0    9.90    6.30
  18  -8   0   -5.60   10.50
 -18   8   0    3.90    8.30
  18   8   0   12.70    7.20
 -18   8   0    1.70    9.00
  18   8   0    1.20    7.40
  18   8   0    7.80    8.40
 -18   8   0    6.00    7.90
 -20  -8   0    8.80    8.20
  20  -8   0   23.00   12.50
 -20  -8   0   17.00    7.50
  20  -8   0   19.20    9.90
 -20  -8   0   22.30    8.40
  20   8   0   14.20    8.00
 -20   8   0   20.00    8.90
 -20   8   0   19.00    9.30
  20   8   0   14.30    9.40
  20   8   0   11.60    8.80
 -22  -8   0   -3.80    6.80
 -22  -8   0   -0.40    7.70
  22  -8   0  -10.90    9.30
 -22  -8   0  -14.20    7.50
  22  -8   0   13.60   12.00
  22   8   0  -11.20    7.40
  22   8   0    2.30    8.90
 -22   8   0    5.70    8.70
 -22   8   0    4.40    9.00
 -24  -8   0   -5.90    8.20
 -24  -8   0    1.50    8.80
  24   8   0    5.60    9.90
 -24   8   0   18.20   10.00
  24   8   0   -4.20    9.10
  -1  -9   0  499.65   18.50
   1  -9   0  501.85   21.40
   1  -9   0  496.45   18.30
   1  -9   0  502.25   19.30
  -1  -9   0  520.55   21.30
   1  -9   0  521.25   21.80
  -1  -9   0  519.55   21.20
  -1  -9   0  491.75   19.20
   1   9   0  535.85   21.20
  -1   9   0  515.85   19.30
  -1   9   0  544.55   22.30
   1   9   0  544.55   19.20
  -1   9   0  519.45   23.80
  -1   9   0  526.45   20.60
   1   9   0  549.95   22.30
   1   9   0  535.95   23.50
  -1   9   0  550.44   19.30
   3  -9   0  440.56   21.60
  -3  -9   0  469.05   18.60
  -3  -9   0  477.25   18.30
  -3  -9   0  481.25   20.50
   3  -9   0  468.25   18.80
  -3  -9   0  493.75   20.30
   3  -9   0  446.36   20.60
   3  -9   0  463.75   17.50
  -3   9   0  471.25   19.20
  -3   9   0  478.95   19.20
   3   9   0  514.75   22.30
  -3   9   0  460.15   23.00
  -3   9   0  470.35   20.80
   3   9   0  501.55   18.40
   3   9   0  493.55   20.80
   3   9   0  499.75   21.50
  -5  -9   0  248.88   14.80
   5  -9   0  236.28   14.30
  -5  -9   0  233.88   13.60
  -5  -9   0  255.37   14.00
   5  -9   0  259.57   12.80
  -5  -9   0  242.88   15.20
   5  -9   0  229.68   17.40
   5  -9   0  230.08   16.00
  -5   9   0  254.17   14.80
   5   9   0  260.97   16.00
   5   9   0  263.27   15.70
  -5   9   0  260.37   15.10
   5   9   0  270.87   13.80
  -5   9   0  263.77   18.30
  -5   9   0  261.37   13.30
   5   9   0  267.57   16.20
   7  -9   0  101.49    9.60
   7  -9   0   85.59   13.50
  -7  -9   0   98.39   11.50
  -7  -9   0  102.29   10.80
  -7  -9   0  115.79   12.40
   7  -9   0   79.09   10.90
   7  -9   0   75.39   12.10
   7   9   0  110.19   12.40
  -7   9   0  116.69   14.40
  -7   9   0  118.69   11.20
   7   9   0   95.69   11.30
  -7   9   0  109.09   12.10
   7   9   0  118.79   13.00
  -9  -9   0  244.38   15.20
  -9  -9   0  250.27   16.20
   9  -9   0  245.18   18.00
   9  -9   0  252.07   20.40
   9  -9   0  234.48   16.80
   9  -9   0  265.47   13.70
  -9  -9   0  248.18   14.70
   9   9   0  227.48   17.00
   9   9   0  226.38   17.50
  -9   9   0  266.87   20.00
   9   9   0  237.28   14.90
  -9   9   0  247.58   13.70
  -9   9   0  272.27   15.00
  -9   9   0  273.27   18.10
 -11  -9   0  136.09   12.80
  11  -9   0  160.48   12.10
 -11  -9   0  138.89   13.40
 -11  -9   0  132.99   12.30
  11  -9   0  135.79   15.90
  11  -9   0  118.69   18.50
  11  -9   0  137.99   20.80
 -11   9   0  144.39   17.00
 -11   9   0  135.49   15.70
  11   9   0   98.29   14.60
  11   9   0  123.39   12.50
 -11   9   0  143.39   11.90
  11   9   0  122.79   13.00
 -11   9   0  156.58   12.10
  11   9   0  112.19   14.70
 -13  -9   0  108.59   13.80
  13  -9   0  121.19   19.30
 -13  -9   0  123.19   12.70
  13  -9   0  134.09   16.30
 -13  -9   0   94.49   13.10
 -13   9   0  114.39   16.50
  13   9   0  116.39   13.40
 -13   9   0  119.19   11.70
 -13   9   0  104.99   16.70
  13   9   0  128.69   13.10
  13   9   0   95.19   15.20
 -15  -9   0  213.38   17.90
  15  -9   0  279.57   20.20
  15  -9   0  257.97   24.60
 -15  -9   0  247.08   16.60
 -15  -9   0  239.98   18.20
  15   9   0  246.38   16.90
  15   9   0  257.47   18.20
 -15   9   0  249.38   22.00
  15   9   0  221.98   20.70
 -15   9   0  216.78   21.80
 -17  -9   0   51.99    9.40
  17  -9   0   51.79   13.70
 -17  -9   0   49.90    9.40
  17   9   0   85.69   13.70
  17   9   0   56.09   11.60
  17   9   0   56.59   10.00
 -17   9   0   92.79   17.70
  19  -9   0   63.29   11.50
 -19  -9   0   47.60   10.60
 -19  -9   0   54.19   10.50
  19  -9   0   60.59   14.50
 -19  -9   0   53.79    9.40
 -19   9   0   99.29   19.40
  19   9   0   66.09   12.60
  19   9   0   98.69   15.70
  19   9   0   56.69   11.00
 -21  -9   0   22.80    9.30
 -21  -9   0   20.10    8.50
  21  -9   0   27.40   10.60
 -21  -9   0   15.00    9.20
  21  -9   0   46.50   14.30
  21   9   0   21.90   10.40
  21   9   0   35.60   11.70
 -21   9   0   36.00   10.90
  21   9   0   22.40   10.00
 -21   9   0   28.90   10.50
 -23  -9   0   22.70   12.40
 -23  -9   0   12.10   10.60
 -23  -9   0   14.50    9.40
 -23   9   0   14.70   10.40
 -23   9   0   28.50   18.80
  23   9   0   30.70   12.70
  23   9   0    6.50   10.30
   0 -10   0 1831.72   56.39
   0 -10   0 1831.92   53.69
   0 -10   0 1826.32   52.59
   0 -10   0 1816.52   56.09
   0  10   0 1931.71   57.99
   0  10   0 1938.11   60.19
   0  10   0 1908.31   55.89
   0  10   0 2014.50   53.79
   2 -10   0 1242.28   40.90
  -2 -10   0 1190.78   37.10
   2 -10   0 1210.18   36.60
   2 -10   0 1187.48   37.80
  -2 -10   0 1199.08   40.30
  -2 -10   0 1160.38   37.70
   2 -10   0 1208.28   41.40
  -2 -10   0 1244.18   40.50
   2  10   0 1254.57   37.70
  -2  10   0 1271.77   44.40
   2  10   0 1272.37   43.50
   2  10   0 1276.97   40.90
  -2  10   0 1255.27   41.30
  -2  10   0 1245.88   39.20
   2  10   0 1264.37   42.40
  -4 -10   0  620.84   26.30
   4 -10   0  683.33   23.00
   4 -10   0  659.93   28.80
  -4 -10   0  631.84   24.40
  -4 -10   0  610.34   23.70
   4 -10   0  662.73   27.40
  -4 -10   0  601.94   25.80
   4 -10   0  685.53   24.80
   4  10   0  646.84   28.20
   4  10   0  645.64   27.00
  -4  10   0  686.03   26.80
  -4  10   0  682.63   30.40
   4  10   0  660.13   24.00
   4  10   0  653.93   28.10
  -4  10   0  677.83   24.40
   6 -10   0  123.19   17.10
   6 -10   0  101.79   14.10
  -6 -10   0   69.59    9.00
  -6 -10   0   68.39    8.40
   6 -10   0  107.29   15.60
  -6 -10   0   78.09   12.40
  -6 -10   0   84.29   10.80
   6  10   0  107.19   13.80
   6  10   0  102.29   13.00
   6  10   0   72.79    8.20
  -8 -10   0   -7.30    4.60
   8 -10   0   -9.60    5.60
  -8 -10   0    2.30    5.00
  -8 -10   0   -0.70    4.10
   8  10   0   -4.60    4.90
  -8  10   0   -2.90    5.70
  -8  10   0   -0.90    4.70
  -8  10   0   -2.40    4.10
   8  10   0   -0.40    5.40
 -10 -10   0   30.80    7.10
 -10 -10   0   24.90    6.40
  10 -10   0   13.50    8.40
  10 -10   0   10.40    7.00
 -10 -10   0   23.40    5.90
 -10  10   0   13.70    7.50
  10  10   0   26.90    6.20
 -10  10   0   15.90    6.70
 -10  10   0   15.90    5.30
  10  10   0   23.80    7.20
  10  10   0   28.10    7.40
  12 -10   0   -3.30    8.30
 -12 -10   0    5.00    5.30
 -12 -10   0    6.50    5.60
 -12 -10   0    9.90    6.20
  12 -10   0    2.40    6.80
  12  10   0    8.20    6.70
  12  10   0    5.00    6.40
  12  10   0    0.60    5.60
 -12  10   0   -1.50    6.20
 -12  10   0   -5.30    4.30
  12  10   0    0.10    5.80
 -12  10   0   -5.20    6.20
  14 -10   0  -13.60    9.40
  14 -10   0    4.80    8.10
 -14 -10   0    1.70    5.90
 -14 -10   0    5.30    6.50
 -14 -10   0    3.50    5.80
  14  10   0   -1.00    6.10
 -14  10   0   -5.30    6.60
 -14  10   0   -0.70    7.00
  14  10   0    4.50    6.50
  14  10   0   -1.70    7.10
  14  10   0  -10.00    6.10
 -16 -10   0   48.20    8.60
  16 -10   0   34.30   13.00
 -16 -10   0   55.89   10.10
  16 -10   0   49.60   10.40
 -16 -10   0   38.60    9.00
  16  10   0   43.30   11.10
  16  10   0   47.50    8.90
  16  10   0   50.49   10.00
 -16  10   0   48.00   10.60
 -16  10   0   49.30   11.00
 -18 -10   0  186.58   20.40
  18 -10   0  222.38   25.80
 -18 -10   0  187.18   19.90
  18 -10   0  262.27   21.90
 -18 -10   0  211.58   18.60
 -18  10   0  251.67   24.10
  18  10   0  243.58   19.30
  18  10   0  247.58   20.60
  18  10   0  225.88   23.10
 -18  10   0  250.17   24.30
 -20 -10   0  175.38   20.30
  20 -10   0  224.48   21.90
  20 -10   0  207.88   27.10
 -20 -10   0  123.99   20.30
 -20 -10   0  124.09   17.70
  20  10   0  130.79   19.20
 -20  10   0  181.48   24.40
  20  10   0  170.48   20.60
 -20  10   0  192.38   24.30
  20  10   0  156.18   22.80
 -22 -10   0  239.48   25.00
 -22 -10   0  210.88   22.80
  22 -10   0  326.67   38.80
 -22  10   0  271.07   35.70
  22  10   0  230.78   23.10
 -22  10   0  278.87   30.40
   1 -11   0 2185.08   64.39
  -1 -11   0 2070.19   63.99
   1 -11   0 2140.49   64.89
  -1 -11   0 2049.40   59.99
  -1 -11   0 2081.59   63.99
  -1 -11   0 2044.90   60.89
   1  11   0 2105.49   65.49
  -1  11   0 2192.68   63.29
   1  11   0 2188.38   64.19
  -1  11   0 2230.68   68.99
  -1  11   0 2251.17   62.59
   1  11   0 2213.48   68.29
  -1  11   0 2148.49   65.19
   1  11   0 2180.18   61.19
  -3 -11   0  807.02   32.90
  -3 -11   0  792.82   29.10
   3 -11   0  896.21   34.60
  -3 -11   0  777.22   32.40
   3 -11   0  913.11   33.50
  -3 -11   0  797.52   29.80
  -3  11   0  905.41   37.10
   3  11   0  848.92   34.20
   3  11   0  857.51   35.00
   3  11   0  838.52   29.70
  -3  11   0  894.11   33.20
   3  11   0  861.71   33.10
  -3  11   0  924.81   30.80
  -5 -11   0  210.28   17.10
  -5 -11   0  210.38   14.50
  -5 -11   0  215.18   17.40
  -5 -11   0  216.28   15.40
   5 -11   0  302.17   20.30
  -5  11   0  283.87   17.40
  -5  11   0  272.57   21.10
   5  11   0  237.08   17.60
   5  11   0  223.48   15.10
   5  11   0  245.18   18.80
  -7 -11   0   -7.30    4.30
  -7 -11   0   -9.90    5.10
   7 -11   0    5.70    6.40
   7 -11   0   -0.10    6.70
  -7 -11   0   -5.00    5.60
   7  11   0   -0.80    5.60
   7  11   0   -7.50    5.30
  -7  11   0   -7.80    5.60
  -7  11   0   -4.40    4.40
   9 -11   0  129.09   17.50
   9 -11   0  134.69   16.20
  -9 -11   0  129.39   13.70
  -9 -11   0  136.49   15.00
  -9 -11   0  149.69   13.10
   9  11   0  125.89   13.40
   9  11   0  144.49   16.00
   9  11   0  125.19   15.60
  -9  11   0  140.09   13.50
  -9  11   0  125.99   21.60
  -9  11   0  144.79   17.60
 -11 -11   0   47.00    9.00
 -11 -11   0   45.60    8.30
 -11 -11   0   45.20    7.60
  11 -11   0   53.89   10.10
  11 -11   0   52.39   11.40
  11  11   0   33.90    8.00
 -11  11   0   65.49   11.00
 -11  11   0   46.80    9.80
  11  11   0   35.50    7.80
 -11  11   0   72.59   13.80
  11  11   0   39.50    9.00
 -13 -11   0   10.10    7.00
 -13 -11   0    7.90    5.80
  13 -11   0   17.80   10.50
 -13 -11   0    8.10    6.50
  13 -11   0   15.80    8.70
 -13  11   0   19.10    8.30
  13  11   0    8.90    6.80
  13  11   0    5.40    7.60
 -13  11   0   16.70    6.00
  13  11   0    2.70    6.50
 -13  11   0   19.80    7.70
 -15 -11   0   29.20    8.80
  15 -11   0   34.40   13.10
 -15 -11   0   33.50    8.50
 -15 -11   0   23.60    9.10
  15 -11   0   47.40   10.80
 -15  11   0   38.30   10.40
  15  11   0   29.90    8.30
 -15  11   0   42.20   10.20
  15  11   0   27.50    9.00
  15  11   0   30.80   10.40
 -17 -11   0    9.60    8.90
  17 -11   0   29.40   13.60
 -17 -11   0   16.20    9.70
  17 -11   0   32.20   10.20
 -17 -11   0   27.20    9.00
  17  11   0   30.30   10.70
  17  11   0   23.10    9.60
 -17  11   0   28.60   10.90
 -17  11   0   23.30   10.90
  17  11   0   26.50    8.70
  19 -11   0  478.95   34.10
 -19 -11   0  411.16   26.70
  19 -11   0  499.05   28.70
 -19 -11   0  405.36   27.60
 -19 -11   0  375.76   24.90
 -19  11   0  423.46   31.80
  19  11   0  430.16   27.10
 -19  11   0  440.76   32.60
  19  11   0  380.96   25.20
  19  11   0  379.36   30.60
   0 -12   0 1264.57   44.90
   0 -12   0 1327.27   45.10
   0  12   0 1313.07   45.90
   0  12   0 1337.97   44.10
   0  12   0 1292.07   47.80
  -2 -12   0   65.69   10.20
   2 -12   0   60.49   10.20
   2 -12   0   57.39    9.60
  -2 -12   0   60.79   10.00
  -2  12   0   76.39   12.00
   2  12   0   49.10    9.10
   2  12   0   59.79    9.80
   2  12   0   92.89   13.50
  -2  12   0   51.79    8.70
  -2  12   0   51.99    9.80
   4 -12   0  333.37   22.20
  -4 -12   0  294.67   20.70
  -4 -12   0  302.87   19.80
   4 -12   0  332.27   21.40
  -4  12   0  312.97   20.20
   4  12   0  300.67   21.20
   4  12   0  322.27   19.30
   4  12   0  296.77   20.10
  -4  12   0  311.17   23.30
  -6 -12   0   11.60    6.10
  -6 -12   0    8.60    9.60
  -6 -12   0    8.50    7.30
   6 -12   0   14.50    7.40
   6 -12   0   18.00    8.40
  -6 -12   0    7.70    6.60
   6  12   0    7.30    5.80
   6  12   0    4.10    7.20
  -6  12   0    8.40    7.10
  -6  12   0    6.30    6.00
   6  12   0    3.60    7.00
  -8 -12   0    0.30    5.60
   8 -12   0   12.20    9.40
   8 -12   0   14.50    8.10
  -8 -12   0   -2.00    7.00
  -8 -12   0    3.90    6.40
  -8 -12   0    2.90    6.60
   8  12   0    1.90    6.30
  -8  12   0    8.20    5.90
   8  12   0    0.30    6.70
  -8  12   0    7.50    7.40
   8  12   0   -3.80    6.90
 -10 -12   0   15.20    6.10
 -10 -12   0   -6.10    6.50
  10 -12   0    9.60    9.20
 -10 -12   0    7.20    6.90
 -10 -12   0    7.60    7.00
  10 -12   0   13.10    8.30
 -10  12   0    8.60    7.30
  10  12   0   -3.30    6.40
  10  12   0   10.40    8.50
  10  12   0    4.10    7.20
 -10  12   0    8.50    5.60
  12 -12   0    1.50    8.00
 -12 -12   0    3.10    6.90
  12 -12   0   -3.60    8.80
 -12 -12   0   -4.20    5.70
 -12 -12   0   -5.10    6.00
  12  12   0   -5.70    8.00
 -12  12   0    5.50    8.10
  12  12   0   -4.70    7.10
 -12  12   0   -2.80    5.40
  14 -12   0   55.99   13.80
 -14 -12   0   27.50    8.80
 -14 -12   0   37.50   10.70
 -14 -12   0   42.70    9.50
  14 -12   0   55.29   11.30
  14  12   0   40.30   11.60
 -14  12   0   46.00   11.90
  14  12   0   42.00    9.70
  14  12   0   28.60   12.40
 -16 -12   0   -9.70    7.40
 -16 -12   0   -6.80    9.40
  16 -12   0   16.80    9.90
 -16 -12   0  -11.10    7.50
  16 -12   0   10.50   12.80
 -16  12   0    4.90   10.00
  16  12   0   10.70    8.90
 -16  12   0    2.60    9.70
  16  12   0    5.00   10.20
 -18 -12   0  114.79   18.50
  18 -12   0  113.99   21.50
  18 -12   0  179.88   23.10
  18  12   0  144.99   20.30
  18  12   0  138.49   20.10
 -18  12   0  179.78   24.70
  18  12   0   79.39   20.20
 -18  12   0  145.39   29.30
   1 -13   0    0.10    7.50
  -1 -13   0   10.50    7.40
  -1 -13   0   11.20    8.00
   1 -13   0    9.40    8.00
  -1  13   0   13.10    7.10
  -1  13   0   12.40    6.60
   1  13   0   16.10    7.70
  -1  13   0    6.50    6.00
   1  13   0   16.30    6.60
   1  13   0    8.40    6.30
   3 -13   0   -5.70    7.80
  -3 -13   0    0.20    6.60
   3 -13   0   -7.70    7.60
  -3 -13   0    1.20    6.50
   3  13   0   -0.60    6.10
  -3  13   0    1.50    6.10
   3  13   0    0.00    6.50
  -3  13   0   -0.60    6.20
   5 -13   0   25.30   10.40
  -5 -13   0   45.10    9.40
  -5 -13   0   36.20    9.40
   5 -13   0   22.40    9.40
  -5  13   0   34.30    9.60
   5  13   0   35.00    9.00
   5  13   0   31.10    9.00
  -5  13   0   38.50    8.60
  -7 -13   0   40.60    9.60
  -7 -13   0   40.10    8.70
   7 -13   0   25.10   10.70
   7 -13   0   34.40   10.10
   7  13   0   29.30    9.50
  -7  13   0   31.90    8.00
  -7  13   0   33.10    9.80
   7  13   0   25.80    9.20
   9 -13   0  200.28   21.00
  -9 -13   0  186.88   17.80
   9 -13   0  193.38   22.30
  -9 -13   0  203.68   19.80
   9  13   0  179.18   20.50
  -9  13   0  168.58   22.00
  -9  13   0  178.38   17.60
   9  13   0  190.38   20.70
  11 -13   0   84.49   14.30
  11 -13   0   78.09   12.90
 -11 -13   0   56.49   10.60
 -11 -13   0   67.29   11.60
  11  13   0   55.99   11.20
 -11  13   0   56.69    9.70
  11  13   0   62.59   12.50
 -11  13   0   68.69   13.20
  11  13   0   51.09   11.50
  13 -13   0  198.08   21.80
  13 -13   0  215.58   25.30
 -13 -13   0  138.89   20.60
 -13 -13   0  154.28   19.00
 -13  13   0  150.18   23.80
  13  13   0  166.58   18.90
  13  13   0  159.48   21.30
  13  13   0  147.39   22.70
  15 -13   0    8.30   12.70
 -15 -13   0   -1.70    8.90
 -15 -13   0    3.00    9.00
  15 -13   0   20.30   11.60
  15  13   0    6.40    9.20
 -15  13   0   12.10   10.20
  15  13   0    8.40   10.90
   0 -14   0   59.69   11.50
   0 -14   0   57.29   11.40
   0  14   0   64.09   11.10
  -2 -14   0  131.69   17.80
   2 -14   0  125.69   19.30
  -2 -14   0  119.39   19.10
   2 -14   0  142.59   20.30
  -2  14   0  166.88   19.40
  -2  14   0  161.98   17.70
   2  14   0  125.09   17.70
   2  14   0  140.79   16.30
   4 -14   0    5.80    9.20
  -4 -14   0   13.80    9.30
  -4 -14   0   14.00    8.60
   4 -14   0   16.30   10.40
   4  14   0   14.20    8.20
  -4  14   0   18.80    8.50
  -4  14   0   24.30    8.10
   4  14   0    8.80    7.80
  -6 -14   0   81.59   12.70
   6 -14   0   67.99   12.90
   6 -14   0   72.59   13.00
  -6 -14   0   75.49   11.80
   6  14   0   96.39   16.70
   6  14   0   72.49   12.60
  -6  14   0   71.99   13.00
  -6  14   0   63.29   10.50
  -8 -14   0  140.29   17.70
  -8 -14   0   87.99   13.30
   8 -14   0  133.39   21.40
   8 -14   0  137.69   20.40
   8  14   0  133.09   19.20
   8  14   0  125.09   20.10
  -8  14   0  104.29   17.40
 -10 -14   0  246.88   23.90
 -10 -14   0  237.28   21.30
  10 -14   0  273.87   26.60
  10 -14   0  307.27   25.40
  10  14   0  267.07   24.60
 -10  14   0  264.07   26.80
 -10  14   0  262.27   21.50
  10  14   0  248.08   24.30
  12 -14   0  305.07   25.60
 -12 -14   0  245.68   23.60
 -12 -14   0  281.47   24.50
  12 -14   0  282.67   28.10
  12  14   0  253.37   25.80
 -12  14   0  277.27   27.70
 -12  14   0  287.97   22.00
  12  14   0  253.07   24.80
  14 -14   0   90.89   22.60
  14 -14   0   69.09   13.90
   1 -15   0  127.99   20.90
   1 -15   0  132.89   20.30
  -1 -15   0   78.89   13.10
  -1 -15   0   69.59   13.30
  -1  15   0  111.89   18.00
   1  15   0  118.89   18.70
  -3 -15   0   41.70   10.80
  -3 -15   0   38.50   11.60
   3 -15   0   67.99   12.50
   3 -15   0   53.09   12.40
   3  15   0   34.70    9.70
  -3  15   0   40.10    9.50
  -3  15   0   42.00   10.70
   3  15   0   33.40   10.20
   5 -15   0    7.70    9.90
  -5 -15   0    5.90    8.90
   5 -15   0   18.60   10.90
  -5 -15   0    0.50    9.90
  -5  15   0    4.90    8.00
  -5  15   0   -0.50    8.00
   5  15   0    6.50    9.30
   5  15   0    0.40    8.00
   7 -15   0   49.00   12.50
  -7 -15   0   43.90   12.80
   7 -15   0   65.29   14.50
  -7 -15   0   54.49   11.60
  -7  15   0   52.49   12.30
   7  15   0   56.39   12.00
   7  15   0   64.39   12.40
  -7  15   0   58.49   10.70
  -9 -15   0   31.00   13.30
  -9 -15   0   32.00   10.70
   9 -15   0   60.09   13.40
   9 -15   0   60.99   14.70
   9  15   0   50.89   11.90
   9  15   0   39.90   11.00
  -9  15   0   57.59   10.60
  -9  15   0   51.49   12.60
  11 -15   0   69.19   14.00
  11 -15   0   80.29   19.40
 -11  15   0   73.29   11.60
  11  15   0   67.79   12.50
   0 -16   0   13.00   10.00
   0 -16   0    1.60   10.00
   0  16   0   -5.40   12.30
  -2 -16   0    9.40   11.30
   2 -16   0   15.50   10.60
   2 -16   0   10.90   10.00
  -2 -16   0    8.90    9.40
  -2  16   0   -2.20   12.50
   4 -16   0    1.90   10.20
   4 -16   0   13.90   11.00
  -4 -16   0    6.40    9.30
  -4  16   0    0.10   12.00
  -4  16   0    5.50    8.90
   4  16   0  -10.30    8.60
 -28   0   1   12.00   11.00
  28   0  -1   -2.30   10.60
  28   0  -1   -4.90   14.30
  28   0  -1    5.10   16.10
 -28   0   1   18.60   11.90
 -26   0   1    5.90    8.40
  26   0  -1    1.90    9.30
  26   0  -1    0.30    9.80
 -26   0   1   11.30   10.20
 -26   0   1    2.10    7.10
  26   0  -1   11.00   11.20
  24   0  -1   28.20    9.60
 -24   0   1   26.90    9.30
 -24   0   1   19.90   10.30
  24   0  -1    9.60   10.20
 -24   0   1   18.90    7.80
  24   0  -1   32.00   10.30
 -22   0   1    6.50    7.90
 -22   0   1   -0.80    6.20
 -22   0   1   -0.50    8.20
  22   0  -1   -5.80    8.40
  22   0  -1    2.20    7.80
  22   0  -1    4.00    7.90
 -20   0   1    2.90    5.40
  20   0  -1   -1.00    6.40
 -20   0   1   -2.10    7.60
 -20   0   1   -0.30    6.70
  20   0  -1  -13.30    7.40
  20   0  -1   -6.00    6.70
 -18   0   1   36.50    8.50
  18   0  -1   35.60    7.50
 -18   0   1   35.50    6.50
  18   0  -1   47.30    8.10
  18   0  -1   46.30    8.30
  18   0  -1   37.80    9.00
 -18   0   1   39.40    8.20
 -16   0   1   11.90    4.00
  16   0  -1    5.40    5.00
  16   0  -1   -0.30    4.60
 -16   0   1    8.10    5.10
 -16   0   1    7.90    5.60
  16   0  -1   11.90    4.90
  16   0  -1   12.30    6.10
 -16   0   1    8.20    4.20
 -14   0   1   21.80    3.90
  14   0  -1   22.60    5.50
 -14   0   1   17.40    4.70
  14   0  -1   25.50    5.20
 -14   0   1   16.40    5.40
  14   0  -1   20.50    4.70
 -14   0   1   16.90    3.90
  14   0  -1   16.90    4.50
 -12   0   1    8.20    2.90
 -12   0   1    4.90    2.60
  12   0  -1    5.30    3.30
  12   0  -1    4.90    2.90
 -12   0   1    3.20    3.30
 -12   0   1    0.90    3.40
  12   0  -1    3.50    3.30
  12   0  -1    2.60    3.80
 -10   0   1   -0.80    2.40
  10   0  -1    1.60    2.20
  10   0  -1   -4.20    2.60
 -10   0   1   -0.40    1.80
 -10   0   1    2.60    2.20
 -10   0   1   -2.80    2.70
  10   0  -1   -2.10    2.40
  10   0  -1   -1.60    2.30
  -8   0   1    3.80    1.60
  -8   0   1    4.50    1.90
   8   0  -1    4.70    1.90
   8   0  -1    6.80    2.80
  -8   0   1    5.30    2.10
   8   0  -1    2.90    2.30
  -8   0   1    3.60    2.50
   8   0  -1    4.20    2.10
  -6   0   1    9.40    1.90
   6   0  -1    8.10    1.70
   6   0  -1    7.90    2.00
  -6   0   1    8.10    2.10
   6   0  -1    3.40    2.40
  -6   0   1    6.20    1.50
   6   0  -1    8.00    2.30
  -6   0   1    9.00    2.50
  -4   0   1    1.00    1.20
  -4   0   1    0.50    0.80
  -4   0   1    0.00    1.40
   4   0  -1    0.50    0.80
   4   0  -1   -0.50    1.00
   4   0  -1   -1.60    1.20
  -4   0   1    1.10    1.00
   4   0  -1   -0.20    1.20
  -2   0   1   -4.70    0.60
   2   0  -1   -4.80    0.50
   0   0   1  -11.00    0.30
   0   0   1  -10.80    0.30
   0   0   1   -9.50    0.40
   0   0   1  -10.50    0.40
   0   0   1   -9.70    0.50
   0   0   1  -10.20    0.50
  -2   0  -1   -1.20    0.60
   2   0   1    0.00    0.80
   2   0   1   -0.80    0.70
   2   0   1   -1.70    0.70
  -2   0  -1   -0.10    0.80
  -2   0  -1   -1.10    0.80
   2   0   1   -0.50    0.60
   2   0   1    0.80    0.60
   2   0   1   -1.00    0.80
  -4   0  -1   60.19    4.60
   4   0   1   60.09    4.10
  -4   0  -1   63.69    4.90
   4   0   1   52.59    3.90
  -4   0  -1   69.49    3.70
   4   0   1   59.29    4.60
   4   0   1   52.99    4.00
   4   0   1   61.69    3.50
   6   0   1   25.60    3.80
  -6   0  -1   30.20    4.50
   6   0   1   31.90    3.30
  -6   0  -1   33.00    4.70
   6   0   1   27.20    3.90
   6   0   1   29.60    4.40
  -6   0  -1   29.00    3.70
   6   0   1   28.60    4.10
  -8   0  -1   15.10    2.60
   8   0   1   17.40    3.10
   8   0   1   18.80    3.30
   8   0   1   17.00    2.80
   8   0   1   16.00    2.90
 -10   0  -1   22.20    4.20
 -10   0  -1   38.20    7.30
  10   0   1   29.50    4.60
  10   0   1   20.50    3.90
  10   0   1   19.60    3.90
 -10   0  -1   20.60    3.60
  12   0   1   -2.60    3.10
 -12   0  -1    0.20    2.30
  12   0   1   -3.70    3.10
 -12   0  -1   -3.30    3.20
 -12   0  -1    9.30    4.00
  12   0   1    0.20    2.70
 -12   0  -1   -0.70    2.70
  12   0   1    3.00    3.90
 -14   0  -1    0.40    3.90
 -14   0  -1   -2.70    3.80
  14   0   1   -5.70    4.10
  14   0   1   -4.10    4.20
  14   0   1    2.90    3.50
 -14   0  -1   -0.70    3.50
  14   0   1   -0.10    3.80
 -14   0  -1    1.90    2.90
  16   0   1   11.10    5.50
  16   0   1   14.20    4.80
 -16   0  -1   11.20    4.80
  16   0   1   21.70    6.40
 -16   0  -1    9.40    5.70
  16   0   1    8.30    5.60
 -16   0  -1   15.70    6.50
 -16   0  -1    8.50    5.10
 -18   0  -1   12.60    7.10
 -18   0  -1   10.70    7.80
 -18   0  -1   12.40    6.10
  18   0   1   19.20    7.00
  18   0   1   13.10    7.20
  18   0   1   26.00    7.70
 -20   0  -1   20.90    6.70
 -20   0  -1   18.30    8.60
  20   0   1   19.20    8.60
  20   0   1   23.50    8.20
  20   0   1   21.60    8.50
 -20   0  -1   28.60    8.40
 -22   0  -1    5.80    8.30
 -22   0  -1    6.90    7.10
  22   0   1    5.10    9.30
  22   0   1    4.80    8.50
  22   0   1   -5.00    8.70
 -22   0  -1    2.30    8.70
  24   0   1    3.80    9.50
  24   0   1    4.60   10.00
  24   0   1   16.80   10.30
 -24   0  -1    7.80    9.60
 -24   0  -1   -4.10    9.40
 -24   0  -1    3.90    7.50
  26   0   1   -2.70   11.00
 -26   0  -1    1.30   10.30
 -26   0  -1    4.70    8.70
  26   0   1    6.10   11.10
 -26   0  -1    5.70    9.50
  26   0   1    9.20   11.20
 -27  -1   1   47.20   11.80
 -27  -1   1   42.70    9.60
  27  -1  -1   44.00   12.60
  27  -1  -1   44.00   13.40
  27  -1  -1   31.50   13.30
 -27  -1   1   48.30   11.50
 -27   1   1   25.70   11.60
  27   1  -1   34.10   13.50
  27   1  -1   38.60   12.00
  27   1  -1   60.19   12.90
 -27   1   1   42.50   11.50
 -25  -1   1  128.49   18.10
 -25  -1   1  143.39   21.40
  25  -1  -1  119.59   18.80
 -25  -1   1  107.19   15.60
  25  -1  -1   92.49   14.60
 -25   1   1  111.49   15.90
  25   1  -1  119.79   18.50
  25   1  -1  141.29   19.20
 -25   1   1  112.19   22.20
  25   1  -1  118.79   20.70
 -25   1   1  148.69   18.30
 -23  -1   1  271.17   21.40
  23  -1  -1  247.28   22.00
 -23  -1   1  264.67   18.30
 -23  -1   1  262.27   24.10
  23  -1  -1  200.98   23.10
  23  -1  -1  243.58   21.20
  23   1  -1  232.68   22.30
  23   1  -1  278.27   20.70
  23   1  -1  269.77   20.90
 -23   1   1  216.58   20.80
 -23   1   1  225.48   18.60
 -23   1   1  207.48   24.80
 -21  -1   1   44.70    9.20
 -21  -1   1   44.80    7.80
  21  -1  -1   50.69    9.60
  21  -1  -1   35.50   10.60
  21  -1  -1   52.09   10.40
 -21  -1   1   56.89   10.80
 -21   1   1   55.79    9.80
 -21   1   1   41.80    7.90
  21   1  -1   44.90    8.90
  21   1  -1   54.89    9.70
 -21   1   1   50.19   10.70
  21   1  -1   41.90   10.10
  19  -1  -1   66.69    9.50
 -19  -1   1  109.49   12.50
  19  -1  -1   60.69   10.90
  19  -1  -1   80.19   12.10
 -19   1   1   86.19   12.40
  19   1  -1  114.39   14.20
  19   1  -1   94.89   13.90
  19   1  -1   72.19   10.90
 -19   1   1   90.29   17.40
 -19   1   1   65.89   10.00
 -17  -1   1  904.61   36.00
  17  -1  -1  906.91   34.00
  17  -1  -1  842.62   30.80
 -17  -1   1  889.31   33.20
 -17  -1   1  889.91   30.30
  17  -1  -1  863.71   31.10
  17  -1  -1  900.11   32.50
  17   1  -1  873.01   31.20
  17   1  -1  871.01   30.70
 -17   1   1  881.91   32.80
 -17   1   1  899.71   31.20
  17   1  -1  904.61   32.80
 -17   1   1  873.91   36.20
 -17   1   1  883.11   30.30
  17   1  -1  931.61   33.60
  15  -1  -1  756.62   26.70
  15  -1  -1  780.32   27.40
  15  -1  -1  793.62   29.70
  15  -1  -1  765.22   28.10
 -15  -1   1  787.82   29.20
 -15  -1   1  772.62   26.50
 -15  -1   1  818.62   31.90
  15   1  -1  797.22   26.90
 -15   1   1  791.42   26.60
  15   1  -1  773.32   27.20
  15   1  -1  810.62   29.10
 -15   1   1  796.82   27.90
  15   1  -1  813.12   28.60
 -15   1   1  770.22   31.60
 -15   1   1  771.32   28.60
  13  -1  -1  887.71   29.10
 -13  -1   1  914.01   30.80
 -13  -1   1  903.91   26.90
 -13  -1   1  905.11   28.30
 -13  -1   1  894.91   32.70
  13  -1  -1  913.51   29.70
  13  -1  -1  906.31   31.00
  13  -1  -1  869.21   28.20
 -13   1   1  889.01   28.30
  13   1  -1  898.11   28.30
  13   1  -1  950.20   30.50
 -13   1   1  946.51   30.20
 -13   1   1  941.51   33.80
  13   1  -1  951.60   30.60
  13   1  -1  878.71   28.60
 -13   1   1  913.31   30.30
 -11  -1   1    5.70    3.60
  11  -1  -1    1.40    3.70
  11  -1  -1    1.10    2.90
 -11  -1   1   -0.50    2.70
 -11  -1   1    2.20    2.20
  11  -1  -1    3.30    2.60
  11  -1  -1    1.20    2.90
  11   1  -1   -2.60    3.00
 -11   1   1   10.80    4.10
 -11   1   1    3.00    2.70
  11   1  -1    3.30    2.50
  11   1  -1   -2.00    2.70
  11   1  -1    4.30    3.10
 -11   1   1    2.70    2.80
  -9  -1   1  166.48   10.10
   9  -1  -1  163.88    8.80
   9  -1  -1  155.78    7.80
  -9  -1   1  164.28    7.70
   9  -1  -1  157.88    8.70
   9  -1  -1  161.98    9.80
  -9  -1   1  173.98    9.30
   9   1  -1  163.48    7.70
  -9   1   1  156.88   10.30
   9   1  -1  163.18    9.10
   9   1  -1  161.88    7.90
  -9   1   1  163.98    9.00
   9   1  -1  158.68    8.90
  -9   1   1  169.98    9.00
  -7  -1   1 1372.26   37.90
   7  -1  -1 1240.08   34.90
   7  -1  -1 1365.56   35.90
  -7  -1   1 1338.07   36.60
  -7  -1   1 1340.77   35.00
   7  -1  -1 1257.77   36.00
  -7   1   1 1268.17   38.30
   7   1  -1 1328.97   34.90
  -7   1   1 1268.67   36.70
   7   1  -1 1331.07   36.10
  -7   1   1 1309.57   36.30
   7   1  -1 1345.17   36.70
   7   1  -1 1271.47   34.90
  -5  -1   1 7829.72  187.48
   5  -1  -1 7657.43  186.68
   5  -1  -1 7866.11  188.08
  -5  -1   1 7871.51  188.18
   5  -1  -1 7497.65  187.28
  -5  -1   1 7778.92  186.28
   5  -1  -1 7192.68  186.08
   5   1  -1 7633.64  187.68
   5   1  -1 7385.56  185.58
   5   1  -1 7753.32  186.18
   5   1  -1 7586.24  186.98
  -5   1   1 7309.67  188.98
  -5   1   1 7365.26  185.48
   5   1  -1 7506.65  186.08
  -5   1   1 7310.37  188.08
  -5   1   1 7429.86  186.98
   3  -1  -1   38.70    3.10
   3  -1  -1   41.00    2.40
  -3  -1   1   41.00    2.30
  -3  -1   1   44.60    2.70
  -3  -1   1   46.60    2.80
   3  -1  -1   44.40    2.70
  -3  -1   1   41.60    2.00
   3  -1  -1   39.30    3.10
   3  -1  -1   39.20    2.40
  -3   1   1   39.10    2.40
   3   1  -1   41.20    3.10
  -3   1   1   37.60    2.60
  -3   1   1   36.30    3.40
   3   1  -1   39.90    2.30
   3   1  -1   39.90    2.10
  -3   1   1   36.30    3.30
   3   1  -1   42.40    2.60
  -3   1   1   38.70    2.30
  -1  -1   1    7.80    1.00
   1  -1  -1    7.70    1.10
   1  -1  -1   10.50    1.20
  -1  -1   1    7.90    1.10
   1   1  -1    7.90    1.00
  -1   1   1    8.20    1.40
  -1   1   1    5.50    1.00
  -1   1   1    7.70    1.10
  -1   1   1    8.30    1.10
  -1   1   1    6.70    1.00
   1   1  -1    6.60    1.20
   1  -1   1   10.30    1.40
  -1  -1  -1    9.00    1.30
   1  -1   1   12.30    1.60
   1  -1   1   10.60    1.40
  -1  -1  -1   14.30    1.40
  -1  -1  -1   10.30    1.20
   1  -1   1   11.30    1.70
   1   1   1   13.80    1.50
  -1   1  -1    9.70    1.40
   1   1   1   10.20    1.00
   1   1   1   11.50    1.40
  -1   1  -1    8.70    1.20
   1   1   1   10.90    1.30
   1   1   1    9.20    1.30
  -1   1  -1    9.80    1.50
   1   1   1   14.50    1.40
   3  -1   1  207.28    7.20
   3  -1   1  209.98    7.60
   3  -1   1  209.38    7.60
  -3  -1  -1  221.18    7.90
  -3  -1  -1  221.58    7.20
   3  -1   1  214.98    7.60
  -3  -1  -1  210.08    7.60
  -3   1  -1  221.48    7.70
   3   1   1  212.38    6.70
   3   1   1  213.88    7.20
  -3   1  -1  206.58    8.00
   3   1   1  210.78    7.20
   3   1   1  213.28    7.10
  -3   1  -1  202.18    7.50
   3   1   1  206.28    7.30
  -5  -1  -1 1778.02   45.50
  -5  -1  -1 1776.02   46.50
  -5  -1  -1 1808.62   46.80
   5  -1   1 1658.93   46.00
   5  -1   1 1736.43   45.50
   5  -1   1 1653.13   45.70
   5  -1   1 1701.43   45.60
   5   1   1 1723.73   45.20
  -5   1  -1 1689.73   45.70
   5   1   1 1777.62   45.50
  -5   1  -1 1726.43   46.20
  -5   1  -1 1710.63   47.10
   5   1   1 1752.02   45.30
   5   1   1 1787.92   45.60
   7  -1   1 1406.16   39.10
   7  -1   1 1360.56   39.50
  -7  -1  -1 1449.06   40.50
   7  -1   1 1466.05   39.10
  -7  -1  -1 1444.56   40.00
  -7  -1  -1 1424.16   38.60
   7  -1   1 1384.36   38.80
   7   1   1 1467.05   38.90
  -7   1  -1 1363.36   40.70
   7   1   1 1416.26   38.50
   7   1   1 1446.26   38.90
   7   1   1 1379.06   38.30
  -7   1  -1 1415.56   39.70
  -7   1  -1 1417.26   39.10
  -9  -1  -1  951.10   30.20
  -9  -1  -1  917.21   27.60
   9  -1   1  961.30   28.60
   9  -1   1  896.21   28.90
  -9  -1  -1  954.80   29.50
   9  -1   1  892.91   27.90
   9  -1   1  925.01   28.40
   9   1   1  966.20   28.40
   9   1   1  931.31   27.60
   9   1   1  937.41   27.90
   9   1   1  964.80   28.20
  -9   1  -1  906.41   28.00
  -9   1  -1  914.91   30.60
  -9   1  -1  914.31   29.00
  11  -1   1  203.08    9.60
 -11  -1  -1  216.78   13.00
  11  -1   1  205.38   11.10
 -11  -1  -1  203.88   10.70
  11  -1   1  205.28   11.90
 -11  -1  -1  211.18   12.20
  11  -1   1  211.08   12.00
  11  -1   1  182.88   12.00
  11   1   1  193.18   11.60
  11   1   1  202.68   11.00
 -11   1  -1  213.98   12.10
  11   1   1  208.08   10.90
  11   1   1  178.58   11.00
 -11   1  -1  213.18   11.00
 -11   1  -1  206.78   13.10
  13  -1   1   54.59    9.40
 -13  -1  -1   63.39    9.20
  13  -1   1   52.39    6.90
 -13  -1  -1   64.29   10.20
  13  -1   1   44.30    6.60
 -13  -1  -1   56.89    8.00
  13  -1   1   54.39    8.50
  13   1   1   54.29    6.80
  13   1   1   53.69    8.80
  13   1   1   63.19    9.20
 -13   1  -1   67.59   10.30
 -13   1  -1   77.69    8.20
 -13   1  -1   66.09    7.80
  13   1   1   68.69    8.30
 -13   1  -1   68.69    9.20
  15  -1   1  196.78   13.90
 -15  -1  -1  188.08   12.80
  15  -1   1  186.98   11.50
 -15  -1  -1  194.28   14.60
 -15  -1  -1  202.98   16.40
  15  -1   1  194.88   14.90
  15  -1   1  197.38   13.70
 -15   1  -1  185.58   14.20
  15   1   1  185.98   13.80
 -15   1  -1  191.18   15.50
  15   1   1  195.68   13.70
 -15   1  -1  183.58   12.40
 -15   1  -1  204.08   13.10
  15   1   1  204.38   14.10
  15   1   1  216.08   13.30
 -17  -1  -1  443.96   23.00
  17  -1   1  441.46   22.90
 -17  -1  -1  503.65   25.90
  17  -1   1  463.95   22.50
  17  -1   1  387.96   21.70
 -17  -1  -1  454.85   21.00
 -17   1  -1  418.56   20.90
  17   1   1  466.25   22.00
  17   1   1  503.75   22.10
  17   1   1  465.75   22.80
  17   1   1  464.55   21.90
 -17   1  -1  397.96   22.70
 -19  -1  -1  178.68   19.40
  19  -1   1  134.99   16.50
  19  -1   1  164.88   17.30
 -19  -1  -1  167.88   14.90
 -19  -1  -1  177.78   16.90
  19  -1   1  180.58   16.80
  19   1   1  160.78   15.90
 -19   1  -1  154.78   15.00
  19   1   1  164.48   17.30
  19   1   1  179.18   16.50
 -19   1  -1  146.09   16.60
 -19   1  -1  124.29   18.60
 -21  -1  -1  225.58   20.20
 -21  -1  -1  253.37   22.40
  21  -1   1  192.98   20.40
  21  -1   1  221.38   19.80
  21  -1   1  210.48   20.60
 -21  -1  -1  236.68   18.10
  21   1   1  221.28   19.30
 -21   1  -1  222.58   19.80
  21   1   1  228.88   20.30
 -21   1  -1  247.28   18.00
 -21   1  -1  186.08   21.90
  21   1   1  224.98   19.80
  23  -1   1   39.60   11.40
 -23  -1  -1   49.80   11.50
  23  -1   1   55.49   11.80
 -23  -1  -1   51.69   11.20
 -23  -1  -1   88.39   14.90
  23  -1   1   52.49   12.40
 -23   1  -1   44.70   11.10
  23   1   1   43.00   11.30
  23   1   1   46.20   11.80
 -23   1  -1   48.70   12.40
 -23   1  -1   50.99    9.80
  23   1   1   56.69   11.30
  25  -1   1   53.19   13.30
  25  -1   1   49.90   12.60
 -25  -1  -1   60.89   10.60
  25  -1   1   52.89   13.90
 -25  -1  -1   59.69   12.00
 -25  -1  -1   53.39   12.80
 -25   1  -1   51.59   13.10
  25   1   1   53.59   12.60
  25   1   1   62.09   12.90
 -25   1  -1   48.10   10.60
 -25   1  -1   60.39   12.10
  25   1   1   61.89   12.80
  27  -1   1   69.89   15.70
  27  -1   1   78.19   14.50
 -27  -1  -1  115.99   18.30
 -27   1  -1   63.49   15.00
  27   1   1   82.39   17.40
  27   1   1   80.09   14.90
  27   1   1   65.39   17.70
 -27   1  -1   60.59   11.90
 -27   1  -1   71.69   17.70
  28  -2  -1   62.99   16.50
 -28  -2   1   60.79   11.40
 -28  -2   1  105.89   21.30
  28   2  -1   66.89   13.40
 -28   2   1   59.59   12.70
  28   2  -1   67.39   13.30
 -26  -2   1  148.39   17.10
 -26  -2   1  191.88   20.70
  26  -2  -1  172.58   24.30
  26  -2  -1  172.58   22.40
 -26  -2   1  186.58   22.20
  26  -2  -1  211.98   21.50
  26   2  -1  141.99   22.30
 -26   2   1  193.78   20.60
 -26   2   1  196.68   20.40
 -26   2   1  180.18   25.60
  26   2  -1  164.78   21.00
  26   2  -1  186.68   20.70
  24  -2  -1   72.49   11.60
 -24  -2   1   98.29   16.70
  24  -2  -1   62.39   13.50
  24  -2  -1   53.19   13.00
 -24  -2   1   95.49   18.50
 -24  -2   1   87.09   14.30
 -24   2   1   63.69   11.40
 -24   2   1   47.70   13.00
  24   2  -1   52.29   12.50
  24   2  -1   68.59   11.40
 -24   2   1   67.79   10.00
  24   2  -1   68.99   11.70
  22  -2  -1   34.70   10.30
  22  -2  -1   17.20    9.50
 -22  -2   1   28.20    8.60
 -22  -2   1   35.80    7.70
 -22  -2   1   37.10    9.60
  22  -2  -1   36.00   11.10
  22   2  -1   38.50    8.90
  22   2  -1   25.10    9.20
 -22   2   1   30.70    8.20
 -22   2   1   24.70    8.80
  22   2  -1   27.40   10.10
 -22   2   1   25.30   10.00
  20  -2  -1   44.30    8.70
  20  -2  -1   31.40    9.80
 -20  -2   1   29.40    7.90
  20  -2  -1   32.80    9.50
 -20  -2   1   37.60    8.80
 -20  -2   1   33.60    6.90
  20   2  -1   36.70    8.60
 -20   2   1   48.00   11.20
 -20   2   1   48.10    8.90
  20   2  -1   37.50    8.20
 -20   2   1   50.39    9.80
  20   2  -1   42.40    9.00
 -20   2   1   37.60    7.30
  20   2  -1   33.70    7.80
  18  -2  -1 1151.18   41.50
 -18  -2   1 1151.68   37.90
 -18  -2   1 1136.89   40.80
  18  -2  -1 1185.18   42.80
  18  -2  -1 1188.28   39.20
 -18  -2   1 1205.58   43.70
 -18   2   1 1197.98   44.80
  18   2  -1 1196.38   39.00
  18   2  -1 1165.68   38.60
  18   2  -1 1195.38   40.80
 -18   2   1 1162.28   40.30
  18   2  -1 1100.39   40.30
 -18   2   1 1124.19   38.20
 -18   2   1 1239.98   40.30
  16  -2  -1 1152.68   37.00
 -16  -2   1 1157.08   39.40
 -16  -2   1 1170.68   36.60
 -16  -2   1 1187.08   41.50
  16  -2  -1 1092.99   36.80
  16  -2  -1 1137.69   39.10
  16  -2  -1 1197.48   40.80
  16   2  -1 1206.48   39.80
 -16   2   1 1171.18   42.70
  16   2  -1 1188.18   39.00
  16   2  -1 1171.98   37.00
 -16   2   1 1162.78   38.70
 -16   2   1 1115.29   36.50
 -16   2   1 1217.58   39.20
  16   2  -1 1156.88   37.10
  14  -2  -1 1608.94   47.50
 -14  -2   1 1602.94   49.80
  14  -2  -1 1524.35   47.20
 -14  -2   1 1633.94   47.30
 -14  -2   1 1670.03   51.79
  14  -2  -1 1688.93   51.29
  14  -2  -1 1664.23   49.80
  14   2  -1 1696.33   49.40
 -14   2   1 1682.73   49.50
 -14   2   1 1715.73   50.19
  14   2  -1 1689.23   50.09
  14   2  -1 1613.44   47.50
 -14   2   1 1689.73   53.39
  14   2  -1 1670.53   47.60
  12  -2  -1  804.32   27.40
  12  -2  -1  855.31   27.30
  12  -2  -1  862.31   29.10
 -12  -2   1  870.01   29.30
 -12  -2   1  891.51   30.90
 -12  -2   1  888.71   27.10
  12  -2  -1  898.01   30.60
  12   2  -1  835.22   27.10
  12   2  -1  880.51   29.30
  12   2  -1  882.01   28.70
 -12   2   1  900.51   28.90
  12   2  -1  873.81   27.20
 -12   2   1  886.11   29.50
 -12   2   1  860.51   31.70
 -10  -2   1  127.29   10.00
  10  -2  -1  150.38    8.70
  10  -2  -1  127.39    9.00
  10  -2  -1  155.98   10.90
  10  -2  -1  148.99    8.50
  10  -2  -1  152.58   10.10
 -10  -2   1  130.59    7.90
 -10  -2   1  128.09    9.30
 -10   2   1  146.79    9.70
 -10   2   1  154.48   11.00
  10   2  -1  129.29    7.90
 -10   2   1  145.99    9.00
  10   2  -1  135.39    9.00
  10   2  -1  133.89    8.10
  10   2  -1  139.39    9.40
   8  -2  -1  709.33   21.80
  -8  -2   1  726.23   23.70
  -8  -2   1  730.53   21.70
   8  -2  -1  747.23   23.70
   8  -2  -1  742.03   21.80
  -8  -2   1  750.12   23.30
   8  -2  -1  756.82   24.40
   8  -2  -1  727.23   22.50
  -8   2   1  744.53   25.40
   8   2  -1  717.63   21.50
   8   2  -1  745.73   23.50
  -8   2   1  725.43   22.60
   8   2  -1  736.93   21.70
   8   2  -1  729.23   20.70
   8   2  -1  720.03   22.40
  -8   2   1  745.03   24.20
   6  -2  -1 1513.85   41.70
  -6  -2   1 1567.24   41.10
  -6  -2   1 1514.05   39.80
   6  -2  -1 1407.56   39.80
   6  -2  -1 1469.35   40.10
   6  -2  -1 1546.25   41.90
  -6  -2   1 1575.74   41.00
   6  -2  -1 1546.85   39.90
  -6   2   1 1448.96   42.80
  -6   2   1 1482.85   39.10
   6   2  -1 1511.85   39.50
   6   2  -1 1543.55   41.50
  -6   2   1 1508.85   40.20
   6   2  -1 1550.24   39.50
  -6   2   1 1412.46   42.00
   6   2  -1 1541.45   40.30
   4  -2  -1 2912.51   75.29
  -4  -2   1 3158.88   76.39
   4  -2  -1 2898.51   75.79
   4  -2  -1 3028.00   76.89
  -4  -2   1 3151.88   75.79
  -4  -2   1 3118.49   75.79
  -4  -2   1 3023.60   75.19
   4  -2  -1 2924.21   77.09
   4  -2  -1 3082.69   75.89
   4   2  -1 3119.49   75.79
  -4   2   1 2902.81   77.69
  -4   2   1 2764.02   77.59
   4   2  -1 3064.99   75.59
   4   2  -1 3111.99   76.99
  -4   2   1 2996.90   75.39
   4   2  -1 2986.60   75.09
  -4   2   1 2991.80   75.59
  -4   2   1 2872.21   75.59
  -2  -2   1  716.63   19.10
  -2  -2   1  697.93   18.60
  -2  -2   1  726.53   18.40
   2  -2  -1  697.13   19.30
   2  -2  -1  695.93   19.50
   2  -2  -1  670.93   18.80
  -2  -2   1  728.33   19.10
  -2   2   1  682.83   19.00
   2   2  -1  704.03   18.30
   2   2  -1  690.33   18.70
  -2   2   1  658.13   19.20
   2   2  -1  705.63   19.50
   2   2  -1  685.73   18.20
   2   2  -1  716.13   19.20
  -2   2   1  674.73   19.60
  -2   2   1  682.63   20.50
   0  -2   1   54.79    3.10
   0  -2   1   62.39    3.40
   0  -2   1   56.09    3.40
   0  -2  -1   57.19    3.20
   0  -2  -1   57.79    3.10
   0  -2  -1   56.29    2.50
   0  -2  -1   55.19    3.00
   0  -2   1   55.49    3.00
   0   2  -1   55.79    3.30
   0   2   1   57.09    3.80
   0   2  -1   52.39    3.40
   0   2  -1   55.49    2.90
   0   2  -1   52.59    3.00
   0   2   1   57.69    3.00
   0   2   1   59.39    3.40
   0   2   1   58.49    3.60
   2  -2   1 1104.19   30.30
   2  -2   1 1118.89   30.50
   2  -2   1 1169.48   30.70
  -2  -2  -1 1158.68   29.70
  -2  -2  -1 1198.38   29.80
  -2  -2  -1 1157.98   29.70
   2  -2   1 1121.39   29.80
   2   2   1 1151.58   30.10
   2   2   1 1169.98   29.70
   2   2   1 1139.89   30.30
  -2   2  -1 1087.09   30.20
   2   2   1 1123.19   29.60
  -2   2  -1 1042.80   29.30
  -2   2  -1 1048.40   30.50
   4  -2   1 1346.07   35.50
   4  -2   1 1266.37   35.40
   4  -2   1 1331.47   36.40
  -4  -2  -1 1359.36   35.40
   4  -2   1 1285.57   36.00
  -4  -2  -1 1380.66   36.00
  -4  -2  -1 1360.66   35.30
  -4  -2  -1 1339.37   35.20
   4   2   1 1386.86   35.10
  -4   2  -1 1285.47   36.60
   4   2   1 1328.67   35.30
   4   2   1 1390.86   35.40
   4   2   1 1328.07   35.20
  -4   2  -1 1250.17   34.10
  -4   2  -1 1280.77   36.30
  -4   2  -1 1301.97   35.50
   4   2   1 1369.36   36.10
   6  -2   1 5778.52  150.68
   6  -2   1 6158.58  150.88
  -6  -2  -1 5916.21  151.18
   6  -2   1 5848.81  150.78
  -6  -2  -1 6004.30  151.38
   6  -2   1 6077.69  151.48
  -6  -2  -1 6101.09  150.28
   6   2   1 6116.99  151.28
  -6   2  -1 5984.40  152.58
   6   2   1 5932.61  150.08
  -6   2  -1 5954.10  150.88
  -6   2  -1 6125.39  151.78
   6   2   1 6014.00  150.38
   6   2   1 6049.00  150.18
   6   2   1 6135.99  149.19
   8  -2   1 2939.91   78.29
  -8  -2  -1 3009.80   79.19
   8  -2   1 2948.30   78.89
  -8  -2  -1 2996.80   79.39
   8  -2   1 2858.81   78.39
   8  -2   1 3022.60   78.59
  -8  -2  -1 3050.29   77.79
   8   2   1 3022.80   77.99
   8   2   1 3061.19   78.79
  -8   2  -1 3020.00   79.19
  -8   2  -1 2929.51   80.49
  -8   2  -1 2975.30   78.69
   8   2   1 3050.89   77.69
   8   2   1 3032.60   77.69
 -10  -2  -1  652.03   21.70
 -10  -2  -1  633.14   23.70
  10  -2   1  661.93   22.50
  10  -2   1  667.93   23.30
  10  -2   1  671.73   23.20
 -10  -2  -1  626.64   23.20
  10  -2   1  686.13   23.30
 -10   2  -1  696.33   23.20
  10   2   1  632.14   22.60
  10   2   1  646.64   21.80
 -10   2  -1  670.23   25.00
 -10   2  -1  663.43   23.00
  10   2   1  635.64   22.20
  10   2   1  640.94   21.60
 -12  -2  -1  477.05   21.00
  12  -2   1  449.36   19.60
  12  -2   1  479.85   19.10
 -12  -2  -1  488.75   18.40
  12  -2   1  501.35   20.00
 -12  -2  -1  461.35   20.00
  12  -2   1  474.15   19.90
  12   2   1  463.75   19.20
  12   2   1  478.35   18.60
  12   2   1  500.75   19.70
 -12   2  -1  488.65   19.80
 -12   2  -1  487.55   19.50
 -12   2  -1  470.55   21.60
  12   2   1  468.45   18.60
  14  -2   1  348.27   18.10
 -14  -2  -1  345.67   16.20
  14  -2   1  362.46   18.00
  14  -2   1  315.07   17.90
 -14  -2  -1  339.37   18.00
  14  -2   1  343.87   17.10
 -14  -2  -1  346.17   19.40
 -14   2  -1  339.37   17.50
  14   2   1  323.67   16.60
  14   2   1  350.46   17.50
 -14   2  -1  335.37   16.80
  14   2   1  353.86   16.80
  14   2   1  354.36   17.50
 -14   2  -1  323.57   19.40
  16  -2   1  371.96   19.40
  16  -2   1  348.67   20.30
  16  -2   1  375.46   20.10
 -16  -2  -1  349.17   21.10
 -16  -2  -1  384.46   18.10
 -16  -2  -1  370.26   19.90
 -16   2  -1  350.16   21.90
  16   2   1  350.56   19.10
  16   2   1  338.87   19.10
 -16   2  -1  344.07   19.90
 -16   2  -1  346.27   18.10
 -16   2  -1  364.16   18.70
  16   2   1  354.46   18.60
  16   2   1  364.66   18.60
 -18  -2  -1  517.15   26.40
  18  -2   1  438.56   23.50
 -18  -2  -1  516.25   22.60
  18  -2   1  490.65   24.80
 -18  -2  -1  497.75   24.50
  18  -2   1  477.95   25.00
  18   2   1  480.75   23.60
  18   2   1  481.05   24.20
 -18   2  -1  457.95   24.30
 -18   2  -1  466.05   22.40
  18   2   1  490.45   23.50
  18   2   1  504.65   23.40
 -18   2  -1  452.25   22.60
 -18   2  -1  450.35   26.20
 -20  -2  -1  188.78   19.50
 -20  -2  -1  179.38   17.90
  20  -2   1  223.88   18.70
  20  -2   1  181.28   19.30
 -20  -2  -1  173.48   15.80
  20  -2   1  190.28   19.20
 -20   2  -1  212.48   18.10
 -20   2  -1  202.58   16.30
  20   2   1  177.78   17.50
  20   2   1  171.18   17.70
 -20   2  -1  223.08   21.00
  20   2   1  182.18   18.10
  22  -2   1   -6.60    8.20
 -22  -2  -1   -7.60    7.50
  22  -2   1   -6.70    8.80
 -22  -2  -1    2.00    6.50
 -22  -2  -1   -2.20    7.50
  22   2   1   -5.20    7.90
 -22   2  -1   -7.40    7.50
 -22   2  -1   -9.10    8.30
 -22   2  -1  -10.10    6.40
  24  -2   1   81.59   13.20
 -24  -2  -1   64.79   11.60
 -24  -2  -1  104.09   19.90
 -24  -2  -1  112.09   15.90
  24  -2   1   86.09   14.50
  24  -2   1   63.09   12.90
 -24   2  -1   70.19   13.50
  24   2   1   65.59   13.00
  24   2   1   86.59   13.80
  24   2   1   67.49   12.60
 -24   2  -1  108.39   17.80
 -24   2  -1  105.49   16.30
  26  -2   1  183.28   25.00
  26  -2   1  181.58   22.40
 -26  -2  -1  182.98   24.30
 -26  -2  -1  175.88   21.80
 -26  -2  -1  179.38   19.70
  26  -2   1  165.88   24.40
 -26   2  -1  192.28   19.70
 -26   2  -1  199.18   22.40
  26   2   1  156.08   23.20
 -26   2  -1  179.48   25.20
  26   2   1  198.08   22.60
  26   2   1  169.48   23.50
 -27  -3   1   48.30   11.70
  27  -3  -1   35.40   14.00
 -27  -3   1   52.29   10.40
 -27  -3   1   42.70   11.70
  27  -3  -1   51.69   14.10
  27   3  -1   52.09   12.30
 -27   3   1   61.09   14.00
 -27   3   1   51.49   11.90
  27   3  -1   58.29   14.00
 -25  -3   1   -8.40    7.70
  25  -3  -1    7.70    9.20
 -25  -3   1   10.30    8.80
  25  -3  -1    0.20    9.90
  25  -3  -1    4.60   10.70
 -25  -3   1    5.20    7.20
 -25   3   1   -4.20    9.80
  25   3  -1   -1.10    8.80
 -25   3   1    7.90    7.00
 -25   3   1    6.10    8.70
  25   3  -1   -4.60    8.20
  25   3  -1   -6.90    9.30
 -23  -3   1   -1.40    7.90
  23  -3  -1    8.80   10.20
  23  -3  -1    4.90    8.40
  23  -3  -1    2.60    9.60
 -23  -3   1   -4.40    7.30
 -23  -3   1    2.10    6.30
 -23   3   1   -1.80    6.20
 -23   3   1    8.80    8.00
 -23   3   1    3.50    9.70
  23   3  -1   -2.00    7.90
  23   3  -1   -6.40    8.00
  23   3  -1  -15.20    8.40
  21  -3  -1   -9.00    7.00
 -21  -3   1   -2.80    6.40
  21  -3  -1   -5.40    8.20
 -21  -3   1   -7.50    6.60
  21  -3  -1    1.70    8.90
 -21  -3   1    1.70    5.30
 -21   3   1    1.50    6.80
 -21   3   1    2.90    6.40
 -21   3   1   -6.20    5.40
  21   3  -1    0.40    6.40
 -21   3   1    4.10    7.60
  21   3  -1   -5.00    6.50
  21   3  -1   -3.20    6.30
  19  -3  -1   56.89    8.70
  19  -3  -1   62.89   10.70
 -19  -3   1   76.69   13.10
 -19  -3   1   47.50    8.70
  19  -3  -1   55.09   10.80
  19   3  -1   50.89    8.40
  19   3  -1   42.60    8.10
  19   3  -1   47.30    8.60
  19   3  -1   43.20    9.10
 -19   3   1   68.29   11.50
 -17  -3   1  438.36   21.80
 -17  -3   1  473.55   23.40
  17  -3  -1  445.66   23.90
 -17  -3   1  455.15   19.70
  17  -3  -1  429.66   21.40
  17  -3  -1  454.05   25.10
  17   3  -1  465.35   22.70
  17   3  -1  454.45   20.50
 -17   3   1  493.15   22.90
  17   3  -1  410.16   20.70
 -17   3   1  494.05   25.90
 -17   3   1  468.65   21.80
  17   3  -1  460.95   21.80
  15  -3  -1  403.26   22.30
  15  -3  -1  388.96   18.40
 -15  -3   1  395.16   16.90
 -15  -3   1  379.36   19.70
  15  -3  -1  410.56   20.80
 -15   3   1  430.56   20.30
  15   3  -1  345.27   17.30
  15   3  -1  372.16   18.60
 -15   3   1  402.26   21.80
 -15   3   1  399.06   18.90
  15   3  -1  362.76   19.30
  15   3  -1  347.87   17.20
 -13  -3   1  492.55   21.20
 -13  -3   1  495.25   20.70
  13  -3  -1  508.55   19.80
 -13  -3   1  488.85   18.60
  13  -3  -1  511.25   23.30
  13  -3  -1  495.35   21.80
  13   3  -1  501.65   21.40
 -13   3   1  508.15   20.30
  13   3  -1  483.65   18.90
  13   3  -1  486.65   20.00
  13   3  -1  486.25   18.70
 -13   3   1  492.55   23.20
 -13   3   1  502.85   21.50
 -11  -3   1  546.95   20.60
  11  -3  -1  524.15   21.30
  11  -3  -1  539.85   22.20
  11  -3  -1  502.95   18.90
 -11  -3   1  523.25   18.40
 -11  -3   1  521.15   20.20
  11  -3  -1  489.75   19.20
 -11   3   1  518.85   19.40
  11   3  -1  547.25   18.50
 -11   3   1  505.65   21.10
  11   3  -1  519.25   17.00
  11   3  -1  523.65   19.40
 -11   3   1  505.25   22.50
  11   3  -1  530.15   20.80
   9  -3  -1  439.76   15.90
  -9  -3   1  432.76   17.00
   9  -3  -1  450.25   18.10
  -9  -3   1  413.86   16.40
   9  -3  -1  431.36   15.80
   9  -3  -1  471.15   18.70
  -9  -3   1  432.06   15.40
   9   3  -1  454.75   16.00
  -9   3   1  405.36   17.80
   9   3  -1  436.26   14.50
  -9   3   1  422.26   18.80
   9   3  -1  436.06   17.10
   9   3  -1  417.76   14.90
  -9   3   1  427.06   15.90
  -9   3   1  432.36   14.00
   7  -3  -1   40.40    4.50
  -7  -3   1   36.10    4.50
  -7  -3   1   26.10    4.60
   7  -3  -1   39.00    6.60
  -7  -3   1   31.70    5.30
  -7  -3   1   37.50    4.10
   7  -3  -1   41.10    6.70
   7  -3  -1   38.40    5.20
  -7   3   1   29.40    5.90
  -7   3   1   33.30    6.10
   7   3  -1   33.80    4.00
  -7   3   1   36.40    3.90
   7   3  -1   46.00    5.40
  -7   3   1   39.30    4.50
   7   3  -1   39.80    4.20
   7   3  -1   36.70    4.60
   5  -3  -1  132.69    8.30
   5  -3  -1  135.29    7.00
  -5  -3   1  144.39    7.10
  -5  -3   1  144.89    6.20
   5  -3  -1  141.19    7.90
   5  -3  -1  143.19    6.50
  -5  -3   1  138.89    6.00
   5  -3  -1  134.39    6.00
  -5  -3   1  159.08    6.80
   5   3  -1  156.08    6.70
  -5   3   1  125.29    8.70
   5   3  -1  147.09    6.10
  -5   3   1  132.79    6.00
  -5   3   1  129.09    8.10
  -5   3   1  119.29    6.20
   5   3  -1  151.68    7.60
  -5   3   1  137.49    6.10
   5   3  -1  148.89    6.40
  -3  -3   1 2758.12   67.79
   3  -3  -1 2636.24   67.19
   3  -3  -1 2574.54   68.39
  -3  -3   1 2761.12   68.49
   3  -3  -1 2793.12   68.99
  -3  -3   1 2781.42   68.49
   3  -3  -1 2586.64   69.39
  -3  -3   1 2773.22   67.69
   3   3  -1 2729.93   67.89
  -3   3   1 2619.14   68.09
   3   3  -1 2773.52   67.69
   3   3  -1 2775.22   69.29
   3   3  -1 2683.73   67.49
  -3   3   1 2578.64   70.89
  -3   3   1 2539.55   68.59
  -3   3   1 2597.54   69.29
   3   3  -1 2692.63   68.69
  -1  -3   1   46.10    3.20
   1  -3  -1   44.20    3.70
  -1  -3   1   48.60    3.50
   1  -3  -1   42.50    3.50
  -1  -3   1   46.60    3.90
   1  -3  -1   41.40    3.80
  -1  -3   1   45.30    3.60
   1  -3  -1   43.90    2.60
   1   3  -1   46.30    3.90
   1   3  -1   50.29    2.80
  -1   3   1   40.90    3.30
   1   3  -1   50.19    3.60
  -1   3   1   41.00    5.00
   1   3  -1   48.80    3.90
  -1   3   1   38.70    3.30
  -1   3   1   40.40    4.00
  -1   3   1   40.30    3.50
   1  -3   1  358.76   12.20
  -1  -3  -1  352.46   10.50
  -1  -3  -1  349.96   11.10
   1  -3   1  346.57   11.00
   1  -3   1  343.27   11.90
   1  -3   1  347.87   11.30
  -1  -3  -1  347.27   11.20
  -1   3  -1  336.77   10.40
   1   3   1  361.76   12.10
   1   3   1  347.37   10.90
  -1   3  -1  330.97   11.30
  -1   3  -1  340.47   11.20
   1   3   1  355.46   11.90
  -1   3  -1  339.97   12.10
   1   3   1  354.56   12.10
  -3  -3  -1 1258.47   33.00
   3  -3   1 1245.08   34.10
   3  -3   1 1233.88   34.50
  -3  -3  -1 1234.58   32.90
   3  -3   1 1225.88   34.00
  -3  -3  -1 1224.88   33.00
   3  -3   1 1247.38   33.00
   3   3   1 1178.28   32.70
  -3   3  -1 1195.18   32.60
   3   3   1 1193.28   33.90
  -3   3  -1 1272.27   34.10
   3   3   1 1238.38   32.90
  -3   3  -1 1209.08   34.50
   3   3   1 1215.18   33.70
  -5  -3  -1  934.71   26.00
  -5  -3  -1  928.21   27.00
  -5  -3  -1  945.31   26.60
   5  -3   1  957.80   27.20
  -5  -3  -1  943.51   26.50
   5  -3   1  908.51   28.30
   5  -3   1  939.71   26.70
   5  -3   1  919.81   27.60
  -5   3  -1  979.30   25.80
  -5   3  -1  967.20   28.60
   5   3   1  910.11   26.50
  -5   3  -1  953.70   28.30
   5   3   1  914.51   26.40
   5   3   1  946.81   26.90
  -5   3  -1  936.51   26.80
   5   3   1  900.51   27.50
  -7  -3  -1 1500.55   42.50
   7  -3   1 1478.15   43.10
   7  -3   1 1568.24   44.40
  -7  -3  -1 1566.64   42.20
  -7  -3  -1 1571.64   42.30
   7  -3   1 1549.84   43.30
   7  -3   1 1547.55   42.80
  -7  -3  -1 1539.55   43.30
  -7   3  -1 1549.64   42.90
   7   3   1 1471.65   41.90
   7   3   1 1507.05   42.00
   7   3   1 1549.34   42.50
  -7   3  -1 1583.54   45.10
   7   3   1 1550.54   43.70
  -7   3  -1 1628.44   44.70
  -7   3  -1 1559.54   40.30
   7   3   1 1543.95   41.80
   9  -3   1  227.48   13.00
   9  -3   1  248.68   12.40
   9  -3   1  264.67   12.50
  -9  -3  -1  230.08   11.00
   9  -3   1  258.77   13.70
   9   3   1  240.78   11.50
  -9   3  -1  275.07   14.30
  -9   3  -1  249.48   12.20
   9   3   1  217.98   10.00
   9   3   1  223.18   12.10
 -11  -3  -1  161.18   11.60
  11  -3   1  160.58   12.50
 -11  -3  -1  139.39   11.50
  11  -3   1  168.88   11.60
 -11  -3  -1  162.88   10.30
  11  -3   1  187.98   11.90
  11  -3   1  172.58   12.60
  11   3   1  158.88   11.00
  11   3   1  171.68   10.40
 -11   3  -1  170.08   12.10
  11   3   1  164.28   11.40
 -11   3  -1  165.08   13.00
  11   3   1  165.98   10.90
 -11   3  -1  173.28   11.30
  13  -3   1   19.30    5.90
  13  -3   1   15.30    5.70
  13  -3   1   19.80    5.50
  13  -3   1    6.60    5.20
 -13  -3  -1   13.60    4.40
 -13  -3  -1   14.50    5.10
 -13  -3  -1   13.00    5.20
 -13   3  -1    7.50    4.90
  13   3   1   14.60    5.10
 -13   3  -1    6.90    4.90
  13   3   1   13.20    5.10
 -13   3  -1    9.30    5.30
  13   3   1   14.40    5.00
  13   3   1   18.50    5.00
 -15  -3  -1    8.40    4.70
  15  -3   1    9.20    6.50
 -15  -3  -1    9.20    5.20
 -15  -3  -1   16.00    4.90
  15  -3   1   14.60    5.70
  15  -3   1    5.90    5.80
  15  -3   1    9.30    6.20
 -15   3  -1    8.70    5.80
 -15   3  -1    8.20    4.80
  15   3   1    6.40    5.20
  15   3   1    2.40    5.10
 -15   3  -1    2.40    5.40
  15   3   1    7.10    5.20
  15   3   1    6.10    5.10
 -17  -3  -1  223.38   16.60
  17  -3   1  201.08   17.80
  17  -3   1  179.18   17.10
  17  -3   1  226.48   18.20
  17   3   1  179.08   15.60
 -17   3  -1  246.98   19.20
  17   3   1  171.68   16.00
 -17   3  -1  216.68   17.10
  17   3   1  148.99   15.30
  17   3   1  208.28   16.20
  19  -3   1   12.20    8.50
  19  -3   1    5.00    7.70
 -19  -3  -1   18.90    7.30
 -19  -3  -1   10.10    6.80
 -19  -3  -1   12.00    6.60
  19  -3   1    1.60    8.20
 -19   3  -1   11.30    6.70
  19   3   1    7.80    7.70
  19   3   1    1.40    7.40
 -19   3  -1   16.70    6.00
 -19   3  -1   11.10    6.30
 -19   3  -1   11.60    6.80
  19   3   1    8.30    7.10
  19   3   1   19.00    7.20
 -21  -3  -1   13.70    8.10
  21  -3   1   15.80    9.50
  21  -3   1   11.40    8.70
 -21  -3  -1   20.10    7.20
 -21  -3  -1    9.10    7.80
  21  -3   1    7.60    8.70
 -21   3  -1   15.70    7.30
  21   3   1   11.20    8.40
 -21   3  -1   17.50    9.10
 -21   3  -1   18.80    8.20
  21   3   1    1.40    8.10
  21   3   1   -6.90    8.00
  23  -3   1   20.90   10.10
 -23  -3  -1   13.10    8.80
  23  -3   1   23.50   10.90
 -23  -3  -1   25.00    8.20
 -23  -3  -1   15.10    9.00
  23  -3   1   21.80   10.10
  23   3   1   15.50    9.80
  23   3   1   -5.70    9.20
 -23   3  -1   20.10    8.60
 -23   3  -1   23.20   10.10
 -23   3  -1   25.20    8.10
  23   3   1   16.20    9.80
 -25  -3  -1   37.00    9.00
  25  -3   1   44.00   12.10
  25  -3   1   40.00   12.40
 -25  -3  -1   34.30   15.60
 -25  -3  -1   29.10   10.80
  25  -3   1   27.90   11.50
 -25   3  -1   34.90    9.50
  25   3   1   12.20   11.10
 -25   3  -1   41.70   11.20
 -25   3  -1   33.00   12.00
  25   3   1   24.50   11.00
  25   3   1   29.60   11.50
  26  -4  -1   55.79   14.40
 -26  -4   1   46.80    9.80
  26  -4  -1   46.30   14.60
 -26  -4   1   48.10   11.60
 -26   4   1   37.70   12.20
  26   4  -1   70.99   12.40
  26   4  -1   62.99   12.60
 -26   4   1   43.50   11.10
  24  -4  -1   61.49   14.00
 -24  -4   1   42.60   11.80
 -24  -4   1   43.00    9.00
  24  -4  -1   59.99   13.60
 -24  -4   1   46.50   10.90
  24   4  -1   46.20   11.50
 -24   4   1   49.90   10.40
  24   4  -1   57.59   10.90
 -24   4   1   59.69   13.20
  22  -4  -1    0.40    7.80
 -22  -4   1   -4.00    7.10
  22  -4  -1   11.50   10.10
 -22  -4   1    2.20    8.10
  22  -4  -1   13.90   10.40
 -22  -4   1    5.80    6.20
 -22   4   1    4.30    6.20
 -22   4   1    8.70    8.30
  22   4  -1   10.30    7.40
  22   4  -1  -10.80    8.20
 -22   4   1    8.60    8.00
 -22   4   1   11.90    7.10
  22   4  -1    6.00    8.20
  20  -4  -1    5.20    7.20
 -20  -4   1   -5.60    5.50
 -20  -4   1    7.10    6.50
  20  -4  -1    7.90    9.30
 -20  -4   1    3.90    5.40
  20  -4  -1    4.50    8.70
 -20   4   1    2.00    5.90
 -20   4   1   -2.80    7.30
 -20   4   1   -2.90    6.20
  20   4  -1    2.70    6.20
  20   4  -1  -10.10    6.20
 -18  -4   1   14.30    5.80
  18  -4  -1   25.40    9.50
 -18  -4   1   12.30    5.20
  18  -4  -1   10.20    8.10
 -18  -4   1   19.00    6.00
  18  -4  -1    0.10    6.70
  18   4  -1    6.60    6.20
 -18   4   1   11.30    5.90
 -18   4   1    8.30    6.10
  18   4  -1   -2.60    6.30
 -18   4   1   10.30    7.20
 -16  -4   1  180.08   13.80
  16  -4  -1  132.79   16.00
 -16  -4   1  154.98   13.00
 -16  -4   1  161.08   11.70
  16  -4  -1  171.88   18.20
 -16   4   1  141.39   15.00
  16   4  -1  166.08   14.10
 -16   4   1  147.29   13.90
  16   4  -1  138.59   13.00
 -16   4   1  138.19   12.80
  16   4  -1  131.09   12.50
 -14  -4   1   46.10    9.00
  14  -4  -1   62.49    9.30
 -14  -4   1   52.29    9.00
  14  -4  -1   39.20    8.00
  14  -4  -1   32.40    8.30
  14  -4  -1   42.20    6.60
  14   4  -1   36.00    5.90
 -14   4   1   62.99   11.20
 -14   4   1   39.90    6.20
  14   4  -1   54.09    8.70
  14   4  -1   35.10    6.60
  14   4  -1   30.40    4.60
  12  -4  -1   15.50    6.60
 -12  -4   1   14.40    3.60
 -12  -4   1   16.30    4.40
  12  -4  -1   10.20    5.80
 -12  -4   1   17.10    3.60
  12  -4  -1   14.40    4.10
 -12  -4   1   14.50    3.90
  12  -4  -1    9.90    4.40
  12   4  -1    5.80    3.00
 -12   4   1   10.60    2.70
 -12   4   1   10.80    4.10
  12   4  -1   19.20    4.00
 -12   4   1   10.10    4.40
  12   4  -1   12.60    4.50
 -12   4   1   11.20    4.80
  12   4  -1   13.70    4.10
 -10  -4   1  216.08   12.50
 -10  -4   1  242.08   10.90
  10  -4  -1  242.18   11.70
  10  -4  -1  250.67   12.50
  10  -4  -1  217.98   14.80
 -10  -4   1  216.78   11.50
  10  -4  -1  235.28   15.50
 -10  -4   1  229.18   11.40
 -10   4   1  233.18    9.90
 -10   4   1  232.08   14.80
  10   4  -1  219.78   12.60
 -10   4   1  232.18   11.60
  10   4  -1  231.58   10.80
  10   4  -1  226.98   10.60
 -10   4   1  221.58   13.90
  10   4  -1  227.58   11.70
   8  -4  -1  639.54   21.80
  -8  -4   1  699.63   21.80
   8  -4  -1  676.03   25.10
  -8  -4   1  793.62   24.00
   8  -4  -1  717.83   24.80
  -8  -4   1  769.12   22.40
   8  -4  -1  673.93   23.00
  -8  -4   1  743.83   22.70
  -8   4   1  669.53   25.40
  -8   4   1  646.44   25.30
  -8   4   1  642.14   21.30
   8   4  -1  786.22   24.60
  -8   4   1  694.63   22.20
   8   4  -1  763.92   22.70
   8   4  -1  749.03   22.10
   8   4  -1  791.22   22.70
   6  -4  -1  636.14   22.60
   6  -4  -1  646.34   19.90
  -6  -4   1  701.23   21.20
  -6  -4   1  665.23   19.80
   6  -4  -1  612.94   19.40
  -6  -4   1  693.43   19.70
  -6  -4   1  696.53   20.80
   6  -4  -1  626.94   20.80
   6  -4  -1  678.13   21.90
  -6   4   1  646.34   19.60
   6   4  -1  693.63   19.90
  -6   4   1  600.44   20.00
   6   4  -1  685.13   20.10
   6   4  -1  709.03   20.90
  -6   4   1  655.43   19.60
   6   4  -1  703.33   22.00
  -6   4   1  640.14   23.80
  -6   4   1  615.94   22.60
   4  -4  -1  501.25   15.60
  -4  -4   1  559.54   16.00
  -4  -4   1  557.04   16.50
   4  -4  -1  516.55   18.50
   4  -4  -1  528.95   17.30
  -4  -4   1  573.34   17.20
  -4  -4   1  562.54   17.30
   4  -4  -1  549.85   17.60
   4   4  -1  551.04   16.30
  -4   4   1  517.55   19.70
   4   4  -1  580.64   16.50
   4   4  -1  558.84   18.00
  -4   4   1  508.35   16.40
  -4   4   1  505.05   17.20
   4   4  -1  566.34   17.60
   4   4  -1  570.74   16.50
  -4   4   1  525.05   18.10
   2  -4  -1  286.47   11.30
   2  -4  -1  284.17    9.20
  -2  -4   1  309.07   11.10
  -2  -4   1  308.67   10.40
  -2  -4   1  308.27    9.80
   2  -4  -1  297.07   10.60
   2  -4  -1  286.97   10.70
  -2  -4   1  311.27   10.50
  -2   4   1  290.07   10.60
  -2   4   1  284.47   11.20
   2   4  -1  309.77   11.00
  -2   4   1  297.87   10.30
   2   4  -1  307.47   11.20
   2   4  -1  311.37   11.00
   2   4  -1  307.47    9.60
  -2   4   1  284.47   10.60
  -2   4   1  291.57   12.80
   0  -4   1  292.17   10.90
   0  -4  -1  282.17   10.60
   0  -4  -1  274.67   10.30
   0  -4  -1  274.07    9.10
   0  -4  -1  289.97   10.10
   0  -4   1  283.77   10.60
   0  -4   1  285.77    9.80
   0  -4   1  293.97    9.90
   0   4  -1  302.47   10.80
   0   4   1  282.47    9.80
   0   4   1  281.17   10.70
   0   4  -1  295.07   10.00
   0   4  -1  286.47    9.80
   0   4  -1  304.67   11.40
   0   4   1  285.77   11.90
   0   4   1  276.57   11.20
   2  -4   1  130.39    6.00
   2  -4   1  130.79    6.60
   2  -4   1  118.59    7.10
  -2  -4  -1  110.19    5.60
  -2  -4  -1  131.59    6.40
   2  -4   1  148.89    8.00
  -2  -4  -1  116.59    6.30
  -2   4  -1  134.99    5.50
   2   4   1  107.19    5.90
   2   4   1  107.79    6.00
   2   4   1   99.99    6.70
  -2   4  -1  126.89    7.40
  -2   4  -1  130.79    6.50
   2   4   1   97.19    6.40
  -2   4  -1  123.79    6.40
   4  -4   1   26.90    4.10
  -4  -4  -1   34.90    4.20
   4  -4   1   34.70    5.20
  -4  -4  -1   36.50    4.10
  -4  -4  -1   31.20    4.00
   4  -4   1   37.10    4.00
   4   4   1   26.80    4.10
   4   4   1   33.90    4.80
  -4   4  -1   34.70    4.70
   4   4   1   28.40    4.50
  -4   4  -1   33.30    4.00
  -4   4  -1   34.40    5.20
   4   4   1   40.10    4.30
  -6  -4  -1   31.10    4.60
   6  -4   1   23.40    4.70
   6  -4   1   42.50    4.90
  -6  -4  -1   27.30    4.90
   6  -4   1   47.80    6.70
  -6  -4  -1   38.00    4.60
   6  -4   1   27.60    4.40
   6   4   1   29.30    4.90
  -6   4  -1   38.50    4.30
  -6   4  -1   38.90    4.90
   6   4   1   27.80    5.20
   6   4   1   28.40    4.80
   6   4   1   34.00    4.60
  -6   4  -1   40.00    6.10
  -6   4  -1   36.80    6.30
  -8  -4  -1   71.89    6.30
  -8  -4  -1   60.89    6.50
   8  -4   1   54.49    7.80
   8  -4   1   62.09    9.60
   8  -4   1   46.10    6.50
  -8  -4  -1   54.69    6.30
  -8  -4  -1   65.69    7.20
  -8   4  -1   59.19    6.70
  -8   4  -1   46.30    7.70
  -8   4  -1   49.70    7.90
   8   4   1   75.89    7.00
  -8   4  -1   48.20    5.10
   8   4   1   65.69    6.80
 -10  -4  -1   15.20    4.30
  10  -4   1   18.40    5.30
 -10  -4  -1   19.10    3.90
  10  -4   1   17.10    5.80
  10  -4   1   11.00    3.90
  10  -4   1   15.70    4.60
 -10  -4  -1   18.10    3.80
 -10  -4  -1   17.00    3.90
  10   4   1   22.80    3.70
  10   4   1   20.70    4.20
 -10   4  -1    8.60    4.40
  10   4   1   27.20    5.00
  10   4   1   23.50    4.20
 -10   4  -1    9.70    4.10
 -10   4  -1   14.00    4.10
 -12  -4  -1  145.19   10.00
  12  -4   1  134.09   12.00
 -12  -4  -1  125.89    9.80
  12  -4   1   95.19   11.10
  12  -4   1  121.29   13.40
  12  -4   1  113.29   13.30
 -12  -4  -1  111.09   10.60
 -12  -4  -1  119.69   10.60
 -12   4  -1  107.49   12.70
  12   4   1  108.69   10.10
  12   4   1  141.29   10.80
  12   4   1  111.89    8.40
  12   4   1  132.69   10.10
  12   4   1  128.39   11.50
 -12   4  -1  120.29   12.00
 -12   4  -1   96.19   10.60
  14  -4   1   99.19   12.50
 -14  -4  -1  109.39   11.70
  14  -4   1  103.19   13.50
 -14  -4  -1   91.79   10.30
 -14  -4  -1  100.19   11.20
  14  -4   1   96.89   13.90
  14  -4   1   82.19   11.20
  14   4   1  113.09   12.30
 -14   4  -1   90.99   11.40
  14   4   1  116.79   11.30
 -14   4  -1   96.69   13.10
 -14   4  -1   97.39   12.20
  14   4   1   99.79   11.10
  14   4   1  105.99   11.20
 -16  -4  -1  319.47   18.50
 -16  -4  -1  296.77   18.10
  16  -4   1  269.57   17.60
  16  -4   1  286.37   19.90
 -16  -4  -1  299.07   17.00
  16  -4   1  248.78   18.90
  16  -4   1  268.67   19.80
  16   4   1  256.27   17.50
  16   4   1  299.67   17.50
  16   4   1  338.67   19.50
  16   4   1  306.47   17.80
 -16   4  -1  287.07   17.80
 -16   4  -1  296.37   20.30
 -16   4  -1  279.07   17.60
  18  -4   1  351.96   22.40
 -18  -4  -1  395.46   20.90
 -18  -4  -1  413.36   22.60
  18  -4   1  367.86   23.50
  18  -4   1  382.36   24.20
 -18  -4  -1  375.86   22.10
 -18   4  -1  363.76   24.00
 -18   4  -1  384.96   21.60
  18   4   1  404.86   21.50
  18   4   1  361.06   21.60
  18   4   1  372.86   21.60
  18   4   1  375.06   22.80
 -18   4  -1  402.06   21.80
 -20  -4  -1  161.38   17.30
  20  -4   1  153.88   18.10
  20  -4   1  157.38   19.40
  20  -4   1  158.68   20.00
 -20  -4  -1  157.18   18.10
 -20  -4  -1  154.78   16.00
  20   4   1  179.98   17.30
 -20   4  -1  158.08   16.50
  20   4   1  123.29   17.30
 -20   4  -1  163.38   16.90
  20   4   1  149.49   17.90
  20   4   1  161.48   17.10
 -20   4  -1  174.98   20.10
  22  -4   1    6.00    9.80
 -22  -4  -1   12.20    8.20
  22  -4   1    6.90    9.20
  22  -4   1    2.20    8.80
 -22  -4  -1   -1.90    6.50
 -22   4  -1    8.40    7.10
  22   4   1    5.60    8.30
  22   4   1    8.80    8.40
 -22   4  -1   10.30    7.90
 -22   4  -1   12.30    9.00
 -24  -4  -1   -3.90    8.20
  24  -4   1    7.80    9.60
  24  -4   1   13.40   10.50
  24  -4   1    7.50    9.90
 -24  -4  -1    4.60    7.50
  24   4   1  -12.60    9.00
 -24   4  -1    3.50    7.30
 -24   4  -1    3.10    9.30
  24   4   1   -5.90    8.90
 -24   4  -1    3.10    8.00
  26  -4   1   12.50   11.40
 -26  -4  -1    6.60    8.50
  26  -4   1   -5.60   10.50
  26   4   1   -4.30   10.10
 -26   4  -1    1.90    8.30
 -26   4  -1    3.50    9.50
  25  -5  -1  242.28   27.00
 -25  -5   1  265.77   20.40
 -25  -5   1  261.77   23.80
 -25  -5   1  260.27   20.00
  25  -5  -1  295.47   28.50
  25   5  -1  267.47   23.80
 -25   5   1  251.87   21.90
 -25   5   1  247.28   27.00
  25   5  -1  281.37   21.90
 -23  -5   1  133.49   18.60
  23  -5  -1  156.48   23.00
 -23  -5   1  150.48   15.90
  23  -5  -1  165.48   22.70
  23  -5  -1  197.68   18.20
 -23  -5   1  156.88   16.30
  23   5  -1  130.99   19.10
 -23   5   1  150.18   17.40
 -23   5   1  129.59   22.60
 -23   5   1  162.78   15.80
 -23   5   1  158.78   22.70
  23   5  -1  153.98   18.80
  23   5  -1  167.88   17.60
  21  -5  -1    4.40    9.80
  21  -5  -1    9.20    8.20
 -21  -5   1   13.00    6.40
  21  -5  -1   13.40   10.10
 -21  -5   1   -6.60    9.40
 -21  -5   1    8.60    6.40
 -21  -5   1   -1.20    7.30
 -21   5   1   -6.60    6.60
  21   5  -1    9.80    6.90
  21   5  -1    2.40    7.60
  21   5  -1    1.50    7.80
 -21   5   1    6.50    6.60
 -21   5   1    7.90    8.20
  19  -5  -1  115.19   15.50
 -19  -5   1  101.19   15.00
  19  -5  -1  135.29   20.70
 -19  -5   1  109.69   13.50
 -19  -5   1  115.09   14.30
 -19  -5   1  131.99   12.90
  19  -5  -1  118.99   18.80
 -19   5   1  127.79   14.60
 -19   5   1  124.59   16.40
  19   5  -1  137.09   13.90
  19   5  -1   91.69   15.50
  19   5  -1   90.59   15.20
 -19   5   1  117.59   18.30
 -17  -5   1  452.55   21.70
  17  -5  -1  478.75   27.20
 -17  -5   1  450.35   22.70
 -17  -5   1  446.96   20.70
 -17  -5   1  430.26   20.10
  17  -5  -1  462.95   25.40
  17  -5  -1  445.66   22.10
  17   5  -1  411.16   21.90
 -17   5   1  440.26   21.30
 -17   5   1  435.26   25.20
 -17   5   1  461.65   23.90
  17   5  -1  422.16   23.50
  17   5  -1  420.46   20.40
  15  -5  -1  439.66   20.10
 -15  -5   1  484.35   20.40
  15  -5  -1  438.86   20.70
  15  -5  -1  455.35   25.20
 -15  -5   1  443.76   21.10
 -15  -5   1  465.05   19.60
 -15  -5   1  425.26   19.00
  15  -5  -1  457.55   24.20
 -15   5   1  451.75   24.00
 -15   5   1  425.36   19.70
  15   5  -1  441.26   20.60
  15   5  -1  429.06   19.30
  15   5  -1  456.25   22.50
 -15   5   1  457.35   22.60
  13  -5  -1   72.39   10.50
  13  -5  -1   93.59    9.50
 -13  -5   1   87.69    8.60
 -13  -5   1  105.19   10.20
 -13  -5   1   89.79    9.00
 -13  -5   1  104.69    9.10
  13  -5  -1   69.59   10.50
  13  -5  -1   78.19   10.30
 -13   5   1   95.89    9.50
  13   5  -1   96.09    8.50
 -13   5   1   90.49   11.80
  13   5  -1   87.49    9.00
 -13   5   1  106.29   11.60
  13   5  -1   89.79    9.70
  13   5  -1   98.39   10.80
 -13   5   1  102.89    7.30
  11  -5  -1    4.90    4.30
  11  -5  -1    8.40    6.20
 -11  -5   1   11.30    3.80
 -11  -5   1   13.00    3.10
 -11  -5   1   10.50    3.30
 -11  -5   1   12.00    3.50
  11  -5  -1    7.30    3.10
  11  -5  -1    1.90    5.70
 -11   5   1   12.10    4.20
 -11   5   1   12.00    2.60
  11   5  -1   11.40    3.50
 -11   5   1   13.30    4.80
  11   5  -1   15.00    3.50
 -11   5   1    9.30    3.40
  11   5  -1   14.00    4.10
  11   5  -1   13.20    3.90
  -9  -5   1  578.04   19.30
  -9  -5   1  611.54   19.20
   9  -5  -1  533.85   23.20
  -9  -5   1  606.84   21.10
   9  -5  -1  551.24   20.90
   9  -5  -1  575.34   22.70
  -9  -5   1  593.34   20.30
   9  -5  -1  550.64   19.40
   9   5  -1  596.54   22.10
   9   5  -1  588.44   19.40
  -9   5   1  582.24   23.40
   9   5  -1  601.74   20.10
   9   5  -1  605.34   20.50
  -9   5   1  558.44   23.40
  -9   5   1  555.24   19.00
  -9   5   1  578.74   19.70
  -7  -5   1 2605.74   67.09
   7  -5  -1 2509.75   67.49
  -7  -5   1 2714.73   69.09
   7  -5  -1 2479.15   67.19
   7  -5  -1 2635.54   70.09
  -7  -5   1 2653.33   67.89
  -7  -5   1 2661.63   69.19
   7  -5  -1 2591.64   71.39
   7  -5  -1 2523.75   69.09
  -7   5   1 2489.25   71.29
   7   5  -1 2631.54   67.99
   7   5  -1 2631.14   69.19
   7   5  -1 2662.63   70.69
  -7   5   1 2585.74   72.99
   7   5  -1 2680.23   67.89
  -7   5   1 2548.84   67.19
  -7   5   1 2472.95   68.09
  -7   5   1 2538.85   67.39
  -5  -5   1 3637.64   91.99
  -5  -5   1 3677.63   90.09
  -5  -5   1 3670.53   91.79
  -5  -5   1 3690.83   91.19
   5  -5  -1 3340.77   89.89
   5  -5  -1 3519.45   94.09
   5  -5  -1 3436.76   92.19
   5  -5  -1 3622.24   92.69
   5   5  -1 3679.93   93.29
  -5   5   1 3451.35   90.79
   5   5  -1 3687.83   90.99
  -5   5   1 3416.76   91.99
   5   5  -1 3677.83   90.89
   5   5  -1 3644.14   90.79
  -5   5   1 3492.25   95.79
   5   5  -1 3588.24   92.59
  -5   5   1 3355.56   93.09
   3  -5  -1 2282.77   60.79
   3  -5  -1 2363.86   62.59
  -3  -5   1 2482.45   62.39
  -3  -5   1 2379.56   60.99
   3  -5  -1 2326.27   62.89
   3  -5  -1 2368.26   63.99
  -3  -5   1 2487.55   62.59
  -3  -5   1 2451.85   63.29
   3   5  -1 2486.85   63.79
  -3   5   1 2372.06   62.49
  -3   5   1 2327.57   63.49
   3   5  -1 2437.56   62.99
   3   5  -1 2389.96   61.29
   3   5  -1 2385.26   63.49
  -3   5   1 2367.06   63.09
  -3   5   1 2299.67   65.99
   1  -5  -1 1345.17   38.30
   1  -5  -1 1304.07   37.70
  -1  -5   1 1373.26   36.30
   1  -5  -1 1375.26   37.50
  -1  -5   1 1423.36   38.00
   1  -5  -1 1262.67   35.80
  -1  -5   1 1408.96   38.40
  -1  -5   1 1450.75   37.30
  -1  -5   1 1396.06   36.60
  -1   5   1 1305.47   40.30
  -1   5   1 1311.87   38.00
  -1   5   1 1369.46   37.10
   1   5  -1 1360.86   36.50
  -1   5   1 1312.87   38.90
   1   5  -1 1407.56   37.90
   1   5  -1 1426.66   36.20
   1   5  -1 1445.56   39.10
   1   5  -1 1409.36   38.60
   1  -5   1  226.98   10.30
   1  -5   1  218.68    9.00
   1  -5   1  216.88   10.00
  -1  -5  -1  203.38    9.20
   1  -5   1  218.88    8.60
  -1  -5  -1  204.18    8.20
  -1  -5  -1  207.88    9.40
  -1  -5  -1  217.88    9.10
  -1   5  -1  215.88    8.90
   1   5   1  195.88   10.50
  -1   5  -1  219.38    8.70
   1   5   1  186.38   10.00
  -1   5  -1  221.18    9.80
   1   5   1  207.98    8.70
   1   5   1  204.18    9.80
  -1   5  -1  229.98   10.90
  -3  -5  -1  328.87   11.20
   3  -5   1  273.07   12.40
   3  -5   1  266.67   10.80
   3  -5   1  292.27   13.30
  -3  -5  -1  305.87   11.70
  -3  -5  -1  324.17   11.90
   3  -5   1  262.17   11.80
  -3   5  -1  267.67   11.70
   3   5   1  318.77   12.30
  -3   5  -1  277.17   10.10
  -3   5  -1  266.67   13.10
  -3   5  -1  270.17   11.60
   3   5   1  317.87   12.80
   3   5   1  325.57   11.70
   3   5   1  306.77   11.30
   3   5   1  315.47   13.00
   5  -5   1   16.10    4.40
  -5  -5  -1   13.70    3.10
  -5  -5  -1   13.50    2.90
   5  -5   1   13.80    3.60
  -5  -5  -1   17.70    3.10
   5  -5   1   13.50    2.70
   5  -5   1   19.50    3.60
  -5   5  -1   15.40    2.90
   5   5   1   21.90    3.80
   5   5   1   21.20    3.60
   5   5   1   15.10    3.00
   5   5   1   20.00    3.30
  -5   5  -1   13.10    3.70
  -5   5  -1   10.90    3.10
  -7  -5  -1 2859.01   74.69
   7  -5   1 2662.53   74.39
  -7  -5  -1 2892.21   75.29
   7  -5   1 2731.13   76.29
  -7  -5  -1 2946.71   75.19
   7  -5   1 2733.53   77.69
   7  -5   1 2775.22   75.69
   7   5   1 2942.61   77.39
   7   5   1 3024.80   76.49
   7   5   1 2929.11   75.09
   7   5   1 2891.81   74.69
  -7   5  -1 2865.61   78.39
  -7   5  -1 2750.72   74.59
  -7   5  -1 2727.83   73.59
  -7   5  -1 2813.62   77.49
   9  -5   1  225.98   15.40
   9  -5   1  236.48   13.80
  -9  -5  -1  234.88   11.80
  -9  -5  -1  247.78   10.80
  -9  -5  -1  238.88   12.70
   9  -5   1  255.57   14.80
  -9  -5  -1  246.48   12.20
   9  -5   1  225.38   12.10
   9   5   1  259.57   13.70
  -9   5  -1  231.48   12.20
   9   5   1  268.57   12.60
   9   5   1  246.58   12.10
  -9   5  -1  244.58   14.50
   9   5   1  258.57   12.50
  -9   5  -1  246.98   14.60
  -9   5  -1  245.38   10.50
  11  -5   1   -6.90    5.30
  11  -5   1   -3.60    4.10
  11  -5   1    4.80    5.30
 -11  -5  -1    0.40    3.10
  11  -5   1    0.60    3.60
 -11  -5  -1    4.40    3.40
 -11  -5  -1    5.50    3.80
 -11  -5  -1    5.10    2.90
 -11   5  -1    5.20    3.90
 -11   5  -1    5.80    2.20
 -11   5  -1    2.60    3.90
  11   5   1    5.00    3.90
 -11   5  -1   -3.60    3.50
  11   5   1    4.20    3.70
  11   5   1    1.60    3.00
  11   5   1    2.30    3.50
  13  -5   1  419.86   20.00
  13  -5   1  393.46   18.90
 -13  -5  -1  430.06   19.80
 -13  -5  -1  397.66   18.50
 -13  -5  -1  441.96   18.60
 -13  -5  -1  416.06   18.30
  13  -5   1  399.36   22.40
  13  -5   1  431.16   22.00
  13   5   1  428.56   18.40
  13   5   1  437.66   20.90
 -13   5  -1  415.16   21.90
 -13   5  -1  415.56   19.10
  13   5   1  444.06   19.40
  13   5   1  438.86   18.00
 -13   5  -1  430.16   21.30
  15  -5   1  826.12   34.30
  15  -5   1  825.42   31.80
  15  -5   1  787.52   30.60
 -15  -5  -1  785.32   29.60
 -15  -5  -1  820.62   31.50
  15  -5   1  804.52   33.00
 -15  -5  -1  839.22   30.20
 -15  -5  -1  800.12   29.70
  15   5   1  864.31   33.10
 -15   5  -1  831.62   34.50
  15   5   1  806.82   30.10
 -15   5  -1  832.42   30.80
  15   5   1  845.22   31.00
 -15   5  -1  842.72   32.90
 -17  -5  -1  985.10   36.10
 -17  -5  -1 1046.60   39.40
 -17  -5  -1 1023.20   36.20
  17  -5   1 1111.89   39.00
 -17  -5  -1 1009.10   38.10
  17  -5   1  981.80   39.60
  17  -5   1 1051.39   41.00
  17  -5   1  999.40   37.60
 -17   5  -1 1068.59   42.20
  17   5   1 1010.90   36.60
  17   5   1  989.20   37.30
  17   5   1 1049.79   40.10
 -17   5  -1 1029.90   37.30
 -17   5  -1 1087.69   39.10
  19  -5   1  657.03   30.00
  19  -5   1  584.84   28.80
 -19  -5  -1  611.24   29.00
  19  -5   1  627.24   32.10
 -19  -5  -1  598.34   26.80
 -19  -5  -1  625.34   27.10
  19  -5   1  569.64   30.60
 -19   5  -1  647.74   32.70
  19   5   1  589.54   28.70
  19   5   1  588.34   31.10
 -19   5  -1  639.94   29.60
  19   5   1  625.44   27.70
 -19   5  -1  595.74   28.00
 -21  -5  -1  153.38   17.80
  21  -5   1  153.78   21.40
  21  -5   1  128.49   20.50
  21  -5   1  161.28   19.70
 -21  -5  -1  150.48   16.20
 -21  -5  -1  148.69   16.30
 -21   5  -1  153.88   17.60
 -21   5  -1  162.98   18.40
 -21   5  -1  171.68   21.30
  21   5   1  126.99   16.90
 -23  -5  -1    7.40    7.20
  23  -5   1   -4.60    9.60
  23  -5   1   13.40   11.20
 -23  -5  -1   -2.70    7.00
 -23  -5  -1    6.10    8.10
  23  -5   1    0.40    8.80
 -23   5  -1    1.40    8.70
  23   5   1   -1.70    7.90
  23   5   1   -5.70    8.40
 -23   5  -1   10.00    8.20
 -23   5  -1    6.00    7.20
  25  -5   1   30.00   13.20
 -25  -5  -1   20.30    8.80
 -25  -5  -1   24.80    8.90
  25  -5   1   29.30   11.50
 -25  -5  -1   25.90   10.40
 -25   5  -1   29.60    9.10
  25   5   1   17.30   11.10
 -25   5  -1   20.50   12.10
  25   5   1   21.30   10.20
 -25   5  -1   19.60    9.60
 -26  -6   1  226.38   20.40
 -26  -6   1  207.88   20.40
  26  -6  -1  222.58   28.80
  26   6  -1  207.58   21.90
  24  -6  -1  158.58   24.30
 -24  -6   1  157.58   19.30
  24  -6  -1  189.48   30.30
 -24  -6   1  140.29   16.70
 -24  -6   1  177.88   17.60
  24  -6  -1  160.98   23.80
  24   6  -1  157.08   20.40
 -24   6   1  134.59   18.50
 -24   6   1  143.19   24.40
  24   6  -1  122.69   20.00
  24   6  -1  155.18   17.90
 -22  -6   1   59.99    9.50
 -22  -6   1   78.69   13.40
 -22  -6   1   49.99   10.50
  22  -6  -1   60.39   13.50
  22  -6  -1   72.59   11.20
  22  -6  -1   49.40   13.00
  22   6  -1   48.70   11.10
  22   6  -1   50.59    9.50
 -22   6   1   48.80    9.90
  22   6  -1   57.69   10.90
 -22   6   1   37.60   10.80
 -22   6   1   52.09   12.70
  20  -6  -1    4.90    9.90
 -20  -6   1    1.40    6.10
  20  -6  -1    2.50    7.80
 -20  -6   1    8.90    6.00
  20  -6  -1    7.60   10.30
 -20  -6   1   -5.80    6.60
  20   6  -1    8.50    7.60
  20   6  -1    2.90    6.20
 -20   6   1   -0.40    7.50
 -20   6   1    3.30    8.20
 -20   6   1    4.30    6.40
  20   6  -1    1.30    7.50
 -18  -6   1  213.98   14.70
 -18  -6   1  180.78   15.50
 -18  -6   1  177.88   17.40
  18  -6  -1  199.78   21.20
  18  -6  -1  240.18   17.70
  18  -6  -1  196.88   22.50
 -18   6   1  260.17   21.20
 -18   6   1  235.58   19.20
 -18   6   1  212.28   16.10
  18   6  -1  171.78   18.30
  18   6  -1  205.48   15.20
  18   6  -1  182.18   16.80
  16  -6  -1  359.66   18.60
 -16  -6   1  366.66   19.70
 -16  -6   1  320.07   17.80
  16  -6  -1  330.27   23.00
 -16  -6   1  327.07   17.10
  16  -6  -1  345.87   19.60
 -16  -6   1  317.57   19.30
  16  -6  -1  343.17   24.60
  16   6  -1  287.57   19.10
  16   6  -1  274.37   20.50
  16   6  -1  301.57   17.10
 -16   6   1  389.56   21.70
 -16   6   1  378.06   22.90
 -16   6   1  341.47   18.10
  14  -6  -1   81.09   12.20
 -14  -6   1   90.89   10.60
  14  -6  -1   73.09   11.30
 -14  -6   1   81.89   10.90
 -14  -6   1   68.69    9.60
  14  -6  -1  100.19   15.60
 -14  -6   1   93.39    9.80
  14   6  -1   71.39   10.00
 -14   6   1  104.19   10.50
  14   6  -1   64.89    9.80
  14   6  -1   59.09    8.20
  14   6  -1   59.99    9.20
 -12  -6   1    9.30    4.50
 -12  -6   1   11.00    4.80
  12  -6  -1   12.00    5.30
  12  -6  -1    9.10    7.00
 -12  -6   1   10.70    4.20
 -12  -6   1    9.30    3.60
  12  -6  -1    9.60    6.60
  12   6  -1   15.10    5.30
  12   6  -1    7.20    4.30
 -12   6   1   20.10    4.30
  12   6  -1   11.00    4.00
 -12   6   1   15.10    3.30
  12   6  -1    5.50    4.50
 -12   6   1   22.70    5.90
 -12   6   1   17.30    5.40
 -10  -6   1   46.40    6.50
  10  -6  -1   75.09    7.20
  10  -6  -1   62.19   10.50
  10  -6  -1   53.39    8.00
 -10  -6   1   58.59    7.20
  10  -6  -1   64.69    9.30
 -10  -6   1   51.79    8.00
 -10  -6   1   47.20    8.30
 -10   6   1   77.09    7.40
  10   6  -1   71.99    8.00
 -10   6   1   74.59    7.00
 -10   6   1   71.89    9.90
  10   6  -1   65.49    8.70
  10   6  -1   58.69    7.50
  10   6  -1   60.89    8.00
 -10   6   1   78.49   10.10
  -8  -6   1  404.06   14.00
  -8  -6   1  396.26   16.30
   8  -6  -1  393.16   17.40
   8  -6  -1  380.96   18.60
  -8  -6   1  400.06   16.20
   8  -6  -1  397.56   14.60
  -8  -6   1  400.76   15.30
   8  -6  -1  379.36   16.80
  -8   6   1  379.16   15.20
   8   6  -1  412.96   15.60
   8   6  -1  386.26   15.20
   8   6  -1  420.16   16.70
  -8   6   1  400.36   14.70
  -8   6   1  391.26   19.60
   8   6  -1  404.96   17.50
  -8   6   1  404.96   18.40
   6  -6  -1 2590.04   71.79
  -6  -6   1 2631.44   69.39
   6  -6  -1 2620.74   70.09
  -6  -6   1 2599.94   68.29
   6  -6  -1 2489.65   66.99
  -6  -6   1 2606.04   68.89
   6  -6  -1 2540.65   69.69
  -6   6   1 2595.54   71.09
   6   6  -1 2669.53   68.09
   6   6  -1 2596.94   70.79
  -6   6   1 2512.35   69.09
   6   6  -1 2609.14   70.09
  -6   6   1 2607.44   67.69
   6   6  -1 2609.94   68.09
   6   6  -1 2579.64   67.79
  -6   6   1 2487.15   73.29
  -4  -6   1 2459.05   64.79
  -4  -6   1 2501.85   63.99
  -4  -6   1 2411.36   63.69
   4  -6  -1 2439.36   66.39
   4  -6  -1 2315.77   64.59
   4  -6  -1 2390.06   64.39
   4  -6  -1 2327.97   62.09
  -4   6   1 2347.97   68.39
  -4   6   1 2407.46   63.69
  -4   6   1 2327.97   64.89
   4   6  -1 2426.96   62.69
   4   6  -1 2446.86   64.59
   4   6  -1 2462.85   65.59
   4   6  -1 2471.25   65.49
  -4   6   1 2380.46   64.99
  -2  -6   1 1301.37   35.60
   2  -6  -1 1256.07   37.20
   2  -6  -1 1251.27   35.80
  -2  -6   1 1322.67   36.40
  -2  -6   1 1254.47   34.30
   2  -6  -1 1216.88   36.30
  -2  -6   1 1314.47   37.00
   2  -6  -1 1201.18   34.10
  -2  -6   1 1270.77   34.80
  -2   6   1 1238.78   37.50
   2   6  -1 1334.07   34.70
  -2   6   1 1247.28   35.50
   2   6  -1 1295.97   37.40
  -2   6   1 1234.48   39.70
  -2   6   1 1307.57   35.60
  -2   6   1 1255.57   36.30
   2   6  -1 1285.57   36.70
   2   6  -1 1237.88   34.30
   2   6  -1 1310.47   37.60
   0  -6   1  113.79    6.40
   0  -6   1  130.49    8.20
   0  -6  -1  103.39    7.80
   0  -6   1  128.39    7.00
   0  -6  -1  100.89    7.10
   0  -6   1  131.79    8.50
   0  -6   1  120.39    6.60
   0  -6  -1   99.79    7.70
   0  -6  -1   89.09    6.00
   0   6  -1  127.19    8.30
   0   6  -1  117.19    6.40
   0   6  -1  119.29    8.70
   0   6   1   96.69    6.70
   0   6  -1  127.89    6.40
   0   6  -1  121.99    7.20
   2  -6   1  146.29    8.20
  -2  -6  -1  136.59    8.20
   2  -6   1  149.09    7.60
  -2  -6  -1  125.79    7.20
   2  -6   1  143.99    9.70
  -2  -6  -1  135.59    8.40
   2  -6   1  147.29    9.30
  -2  -6  -1  132.99    8.40
  -2   6  -1  146.79    7.50
   2   6   1  113.49    8.60
  -2   6  -1  145.39   10.20
  -2   6  -1  146.49    8.90
  -2   6  -1  145.09    8.10
   2   6   1  127.49    7.70
   2   6   1  115.79    9.30
   2   6   1  120.79    9.50
   4  -6   1  281.87   12.10
  -4  -6  -1  285.57   12.30
  -4  -6  -1  310.87   11.80
   4  -6   1  260.07   11.40
   4  -6   1  275.87   13.60
   4  -6   1  279.37   14.40
  -4  -6  -1  296.57   12.70
   4   6   1  300.77   13.70
  -4   6  -1  274.47   10.60
  -4   6  -1  258.87   12.20
   4   6   1  297.87   12.80
  -4   6  -1  262.87   14.50
  -4   6  -1  260.37   12.60
   4   6   1  304.57   14.10
   4   6   1  274.77   12.00
  -6  -6  -1  595.84   20.40
   6  -6   1  586.24   21.00
   6  -6   1  607.24   20.20
   6  -6   1  585.74   23.50
  -6  -6  -1  610.14   20.70
  -6  -6  -1  601.34   20.90
   6  -6   1  599.84   22.40
  -6   6  -1  624.74   20.50
   6   6   1  588.14   20.30
  -6   6  -1  611.94   22.30
   6   6   1  624.24   22.50
   6   6   1  600.64   22.50
   6   6   1  586.94   20.40
  -6   6  -1  656.33   24.40
   8  -6   1 1359.96   40.00
   8  -6   1 1392.16   42.30
   8  -6   1 1304.47   43.60
  -8  -6  -1 1353.46   40.20
  -8  -6  -1 1369.96   40.60
  -8  -6  -1 1376.26   40.60
   8  -6   1 1332.57   41.50
   8   6   1 1386.56   43.10
  -8   6  -1 1421.46   44.40
  -8   6  -1 1381.16   43.20
  -8   6  -1 1450.45   39.80
   8   6   1 1399.76   40.50
   8   6   1 1406.76   42.00
  -8   6  -1 1387.16   40.10
   8   6   1 1393.56   40.20
  10  -6   1   59.69    7.60
  10  -6   1   41.60    7.30
  10  -6   1   47.50    7.10
  10  -6   1   38.10    7.80
 -10  -6  -1   31.20    5.40
 -10  -6  -1   48.20    7.50
  10   6   1   45.60    7.80
  10   6   1   48.10    8.00
 -10   6  -1   50.39    7.60
 -10   6  -1   56.89    6.30
  10   6   1   53.29    9.00
 -10   6  -1   59.39    9.70
  10   6   1   36.30    5.60
  12  -6   1   86.79   14.50
  12  -6   1   66.19   10.20
 -12  -6  -1   57.79    7.40
  12  -6   1   91.09   10.10
 -12  -6  -1   62.09    9.60
  12  -6   1   90.99   12.00
 -12  -6  -1   53.49    9.50
 -12   6  -1   90.99   12.10
 -12   6  -1   89.19    7.50
  12   6   1   61.49    9.80
 -12   6  -1   86.09   10.00
  12   6   1   70.59   10.70
  12   6   1   88.89   10.10
 -12   6  -1   89.99   12.20
  12   6   1   79.69   11.40
 -14  -6  -1  573.34   23.90
  14  -6   1  555.14   27.50
  14  -6   1  583.14   24.10
  14  -6   1  564.14   25.60
  14  -6   1  561.64   28.60
 -14  -6  -1  528.45   23.10
 -14  -6  -1  551.54   24.80
  14   6   1  571.34   26.80
  14   6   1  551.54   24.50
 -14   6  -1  577.84   23.90
 -14   6  -1  613.44   27.30
  14   6   1  543.05   23.50
 -14   6  -1  598.14   28.20
  16  -6   1  572.44   26.90
  16  -6   1  567.34   30.20
 -16  -6  -1  530.25   25.50
  16  -6   1  480.95   28.10
  16  -6   1  557.14   25.40
 -16  -6  -1  522.75   23.80
 -16  -6  -1  533.25   24.20
 -16   6  -1  598.24   27.40
 -16   6  -1  596.34   29.70
  16   6   1  510.65   25.40
 -16   6  -1  550.44   24.90
  16   6   1  511.85   24.00
  16   6   1  540.95   28.10
 -18  -6  -1  510.05   24.80
  18  -6   1  534.45   30.40
  18  -6   1  556.54   26.50
 -18  -6  -1  513.75   24.10
  18  -6   1  579.04   28.10
  18  -6   1  459.35   28.70
 -18  -6  -1  520.65   26.40
 -18   6  -1  587.24   28.20
  18   6   1  467.65   28.10
 -18   6  -1  515.65   25.60
  18   6   1  506.15   24.50
  18   6   1  496.75   26.20
 -18   6  -1  594.74   31.20
 -20  -6  -1  304.87   21.60
  20  -6   1  252.97   24.80
  20  -6   1  345.97   24.00
 -20  -6  -1  307.97   19.90
  20  -6   1  293.97   25.80
  20  -6   1  357.46   22.30
 -20  -6  -1  310.37   20.30
  20   6   1  290.57   22.20
 -20   6  -1  324.27   21.40
 -20   6  -1  334.57   25.60
  20   6   1  301.37   20.30
  20   6   1  275.67   23.60
 -20   6  -1  327.77   23.50
 -22  -6  -1   28.10    9.00
  22  -6   1   31.90   12.30
 -22  -6  -1   37.50    9.00
 -22  -6  -1   30.00    8.80
  22  -6   1   31.60   11.10
 -22   6  -1   26.10   11.30
  22   6   1   22.80    8.80
 -22   6  -1   18.70    9.50
  22   6   1   21.40    9.60
 -22   6  -1   31.80    9.20
  22   6   1   22.00    9.70
 -24  -6  -1    4.70    7.70
  24  -6   1   -1.20    9.40
 -24  -6  -1    6.10    8.30
 -24  -6  -1    0.80    7.60
  24  -6   1   -6.60   11.30
 -24   6  -1  -14.80    9.00
  24   6   1    2.00    8.50
  24   6   1  -10.50    9.00
 -24   6  -1   -2.40    7.90
  25  -7  -1   18.20   16.30
 -25  -7   1    0.60   10.60
 -25  -7   1  -12.30    7.30
 -25  -7   1   -0.70    8.10
 -25   7   1    3.50   13.10
  25   7  -1   -0.90    9.70
  25   7  -1  -10.70    9.10
  25   7  -1   -3.00   10.90
 -23  -7   1    6.30    7.70
  23  -7  -1   25.70   12.80
  23  -7  -1   23.70   12.30
 -23  -7   1   14.90    7.50
 -23  -7   1   11.00    7.80
  23  -7  -1   17.20   14.00
  23   7  -1   -0.20    9.10
  23   7  -1   13.40    9.60
  23   7  -1   19.50    8.70
 -23   7   1   12.90    9.50
 -23   7   1   13.70   10.70
 -21  -7   1   13.60    7.60
  21  -7  -1   19.50   11.30
  21  -7  -1   22.10    9.00
  21  -7  -1   23.00   12.00
 -21  -7   1   16.10    6.90
 -21  -7   1   18.80    7.70
 -21   7   1    0.10    8.40
 -21   7   1    3.50    9.60
  21   7  -1   12.30    8.30
  21   7  -1   16.00    7.80
  21   7  -1   18.90    9.20
  19  -7  -1   10.70    8.10
 -19  -7   1    9.80    6.20
  19  -7  -1    3.60   10.30
 -19  -7   1    9.20    6.50
  19  -7  -1    5.60   10.00
 -19  -7   1    8.90    6.90
  19   7  -1    7.20    7.40
  19   7  -1   19.40    8.80
 -19   7   1    6.00    6.50
 -19   7   1    2.60    7.90
  19   7  -1   11.30    7.10
 -19   7   1    7.20    8.10
 -17  -7   1    7.40    6.30
  17  -7  -1   36.60    7.20
 -17  -7   1   10.90    7.20
 -17  -7   1   15.80    5.80
  17  -7  -1   20.90   10.30
  17  -7  -1   12.30    9.90
  17  -7  -1   28.60    7.90
 -17   7   1   23.60    8.50
  17   7  -1   15.00    7.00
  17   7  -1   17.40    6.30
 -17   7   1   20.90    7.60
 -17   7   1   23.70    6.50
  17   7  -1   15.90    7.80
 -15  -7   1   23.90    6.70
 -15  -7   1   20.50    7.00
  15  -7  -1   21.80    7.40
  15  -7  -1   35.10   10.70
 -15  -7   1   35.30    6.40
  15  -7  -1   24.70    9.60
  15  -7  -1   21.00    5.50
  15   7  -1   19.80    7.20
  15   7  -1   26.30    8.60
 -15   7   1   26.70    7.40
 -15   7   1   35.40    7.90
  15   7  -1   35.60    6.60
  13  -7  -1   21.60    4.70
 -13  -7   1   14.00    6.10
 -13  -7   1   17.00    5.20
 -13  -7   1   26.50    6.10
  13  -7  -1   25.00    8.70
  13  -7  -1   25.80    6.70
  13  -7  -1   22.80    9.00
  13   7  -1   13.80    6.20
 -13   7   1   27.40    5.20
 -13   7   1   21.20    4.20
  13   7  -1   10.70    6.90
 -13   7   1   23.70    7.00
  13   7  -1   10.10    5.60
  13   7  -1   25.70    5.90
 -13   7   1   23.70    6.60
  11  -7  -1   47.50    9.10
  11  -7  -1   52.29    8.60
 -11  -7   1   43.60    6.50
  11  -7  -1   82.69   11.80
 -11  -7   1   50.29    7.30
 -11  -7   1   52.09    7.60
 -11  -7   1   54.09    9.10
 -11   7   1   76.89   12.00
 -11   7   1   74.39   12.10
  11   7  -1   48.10    7.00
 -11   7   1   63.49    8.30
  11   7  -1   47.00    8.20
  11   7  -1   54.79    9.30
  11   7  -1   51.69    7.00
   9  -7  -1    1.40    5.40
   9  -7  -1    1.80    4.60
   9  -7  -1    7.20    3.10
  -9  -7   1   -0.80    3.40
   9  -7  -1    7.70    4.60
  -9   7   1   -4.80    3.00
   9   7  -1   -2.60    3.60
  -9   7   1   -3.50    4.00
   9   7  -1    2.50    3.90
   9   7  -1   -1.30    3.50
  -9   7   1   -0.10    4.60
  -9   7   1    5.60    3.10
   9   7  -1   -2.90    3.80
   7  -7  -1  146.29   11.10
   7  -7  -1  141.89   10.90
   7  -7  -1  148.59    8.40
  -7  -7   1  146.29    9.50
   7  -7  -1  156.88   12.80
  -7  -7   1  137.09   10.50
  -7  -7   1  130.09    9.80
   7   7  -1  148.99    9.60
  -7   7   1  138.79   13.10
   7   7  -1  158.98    9.40
  -7   7   1  151.38   11.70
   7   7  -1  147.19   11.20
   7   7  -1  134.69   10.60
   7   7  -1  148.59    9.30
  -7   7   1  158.38    8.90
  -7   7   1  146.99    9.90
   5  -7  -1  179.08    8.70
   5  -7  -1  180.28   12.50
   5  -7  -1  182.38   10.80
   5  -7  -1  184.88   11.30
  -5  -7   1  189.98   11.00
  -5  -7   1  187.58   10.30
  -5  -7   1  186.58   10.10
   5   7  -1  174.88   11.10
   5   7  -1  189.28    9.30
  -5   7   1  191.98    9.80
  -5   7   1  184.18   13.70
   5   7  -1  177.18   11.30
  -5   7   1  189.58   11.20
  -5   7   1  178.18   10.90
   5   7  -1  192.98   10.60
   3  -7  -1  443.66   16.70
   3  -7  -1  425.66   14.80
  -3  -7   1  461.15   17.80
   3  -7  -1  441.06   18.50
  -3  -7   1  456.05   16.40
   3  -7  -1  432.16   17.40
  -3  -7   1  451.15   16.90
  -3  -7   1  442.16   15.80
  -3   7   1  455.05   18.20
   3   7  -1  467.75   15.60
   3   7  -1  470.25   17.90
  -3   7   1  457.55   16.90
   3   7  -1  462.55   18.40
   3   7  -1  478.75   18.40
  -3   7   1  458.25   16.90
  -3   7   1  447.96   20.60
   1  -7  -1   23.70    4.40
   1  -7  -1   24.80    3.40
  -1  -7   1   44.00    5.00
  -1  -7   1   27.90    4.70
   1  -7  -1   30.90    4.90
  -1  -7   1   37.20    5.80
  -1  -7   1   31.90    4.70
  -1  -7   1   35.70    5.30
   1  -7  -1   29.60    4.10
   1   7  -1   41.20    5.30
   1   7  -1   45.10    6.00
  -1   7   1   36.10    6.00
  -1   7   1   31.60    5.70
   1   7  -1   40.70    4.80
   1   7  -1   48.70    7.00
  -1   7   1   26.20    4.70
  -1   7   1   32.80    6.10
   1  -7   1  197.38    9.40
  -1  -7  -1  193.98   11.00
   1  -7   1  201.48   11.50
  -1  -7  -1  189.78   10.00
  -1  -7  -1  186.18   11.00
   1  -7   1  203.68   11.80
  -1  -7  -1  174.58    9.00
   1  -7   1  205.28    9.90
   1  -7   1  196.98    9.20
  -1   7  -1  221.08   10.30
   1   7   1  189.98   11.10
  -1   7  -1  210.18    9.20
  -1   7  -1  203.38   12.50
   1   7   1  178.18   12.60
   1   7   1  197.68    9.70
  -1   7  -1  197.68    9.60
  -1   7  -1  201.18   11.30
   1   7   1  175.38   11.80
  -3  -7  -1   65.09    7.50
  -3  -7  -1   63.69    6.20
   3  -7   1   53.79    5.90
  -3  -7  -1   60.49    7.10
   3  -7   1   51.09    8.00
   3  -7   1   52.29    8.90
  -3   7  -1   47.60    7.00
   3   7   1   49.60    8.20
  -3   7  -1   55.99    5.70
  -3   7  -1   53.59    6.50
   3   7   1   52.29    6.70
   3   7   1   54.59    7.80
   3   7   1   39.30    7.80
  -3   7  -1   49.99    8.40
   5  -7   1  349.57   14.40
  -5  -7  -1  379.36   15.50
   5  -7   1  346.97   16.70
  -5  -7  -1  395.46   15.90
   5  -7   1  352.26   17.60
  -5  -7  -1  405.16   15.00
   5   7   1  396.46   17.50
   5   7   1  396.66   15.40
  -5   7  -1  344.97   18.10
  -5   7  -1  365.46   16.30
   5   7   1  420.76   18.10
   5   7   1  402.96   16.00
  -5   7  -1  375.76   13.60
  -5   7  -1  363.06   15.50
  -7  -7  -1   48.30    7.80
  -7  -7  -1   52.39    7.90
   7  -7   1   77.99   11.10
   7  -7   1   78.59    7.40
  -7  -7  -1   39.90    5.50
   7  -7   1   70.39    9.60
   7  -7   1   61.99    8.70
   7   7   1   51.19    8.40
  -7   7  -1   64.79    9.20
   7   7   1   58.99    8.80
  -7   7  -1   65.39    7.80
   7   7   1   59.49    7.80
  -7   7  -1   62.19   10.10
  -9  -7  -1    0.80    4.60
  -9  -7  -1    4.50    4.60
   9  -7   1    8.20    6.30
   9  -7   1   11.90    3.80
  -9  -7  -1   10.50    4.50
   9  -7   1   19.80    5.60
   9  -7   1   15.50    6.00
   9   7   1   15.50    4.70
  -9   7  -1    7.20    4.60
  -9   7  -1   15.70    4.30
   9   7   1   20.50    5.10
  -9   7  -1    3.50    4.80
   9   7   1   17.10    5.50
   9   7   1    5.80    4.50
  -9   7  -1    4.70    3.50
  11  -7   1    8.70    7.40
 -11  -7  -1   -7.70    4.40
  11  -7   1    4.10    6.90
 -11  -7  -1   -7.70    4.80
  11  -7   1    5.60    4.30
 -11   7  -1    4.10    4.40
  11   7   1   -7.00    4.90
 -11   7  -1   -0.70    3.50
  11   7   1   -2.60    4.30
  11   7   1   -1.80    4.70
 -11   7  -1   -3.00    4.80
  11   7   1    2.30    5.30
 -11   7  -1   -1.30    4.80
 -13  -7  -1   70.49    9.60
  13  -7   1  120.19   15.60
 -13  -7  -1   89.59   12.10
 -13  -7  -1   92.69   12.60
  13  -7   1  121.69   18.40
  13  -7   1  128.49   17.90
 -13   7  -1  122.39   12.60
 -13   7  -1  120.79   15.50
  13   7   1   93.59   12.40
 -13   7  -1  122.99   16.00
  13   7   1   71.79   12.20
  13   7   1   63.49    9.10
  13   7   1   75.69   14.40
 -15  -7  -1   38.70    8.20
 -15  -7  -1   67.39   11.40
 -15  -7  -1   40.90    7.50
  15  -7   1   38.00   11.40
  15  -7   1   46.60   10.90
  15  -7   1   51.19   10.10
  15   7   1   42.30    8.90
  15   7   1   53.19    8.20
  15   7   1   27.60    9.20
  17  -7   1   28.50   11.40
 -17  -7  -1   28.80    7.50
  17  -7   1   30.60   12.00
 -17  -7  -1   39.10    7.50
  17  -7   1   49.60    8.50
 -17  -7  -1   29.20    7.80
  17  -7   1   33.70    9.40
  17   7   1   22.10    8.20
  17   7   1   30.90    7.60
  17   7   1   22.40    8.70
 -17   7  -1   46.40    8.40
 -17   7  -1   40.50    8.80
 -17   7  -1   43.20   10.00
  19  -7   1   55.89    9.50
 -19  -7  -1   27.60    8.30
  19  -7   1   11.30   11.50
 -19  -7  -1   34.40    8.20
 -19  -7  -1   30.50    8.00
  19  -7   1   28.10   10.10
 -19   7  -1   41.00   10.70
 -19   7  -1   34.70    8.50
 -19   7  -1   37.80    9.40
  19   7   1   22.20    8.40
  19   7   1   28.80    9.40
  19   7   1   21.90    8.60
 -21  -7  -1   24.50    8.30
  21  -7   1   23.90   12.30
 -21  -7  -1   22.80    8.60
 -21  -7  -1   20.00    8.10
  21  -7   1   30.90   11.00
  21   7   1   28.10    9.80
  21   7   1   12.80    8.90
  21   7   1   25.40    8.90
 -21   7  -1   26.90    9.40
 -21   7  -1   23.90   10.70
 -21   7  -1   37.20    9.50
  23  -7   1  -10.30    9.50
  23  -7   1    5.60   12.10
 -23  -7  -1   -4.90    7.00
 -23  -7  -1    0.70    7.70
 -23  -7  -1    8.90    8.40
 -23   7  -1    0.50   10.20
  23   7   1   -7.70    9.50
  23   7   1    1.30    8.70
 -23   7  -1   -2.70    8.10
 -23   7  -1   -9.50    8.30
  23   7   1    2.70    8.40
 -24  -8   1   -3.60    8.00
 -24  -8   1    4.70    9.30
 -24  -8   1   -5.90    8.20
  24  -8  -1   12.90   16.30
  24   8  -1    3.80   10.10
  24   8  -1   -2.30   10.00
  24   8  -1  -13.60    8.50
 -24   8   1   14.70   10.80
 -24   8   1   18.20    9.70
  22  -8  -1   -7.90    9.00
 -22  -8   1   -5.90    7.30
 -22  -8   1  -12.30    6.20
  22  -8  -1    1.20   11.20
 -22   8   1    0.40    9.20
 -22   8   1    9.60    8.90
  22   8  -1  -12.80    7.20
  22   8  -1   -5.70    8.60
  22   8  -1  -16.60    7.90
  20  -8  -1   53.89   13.30
 -20  -8   1   49.20    8.80
 -20  -8   1   39.50    9.00
 -20  -8   1   56.59   10.00
  20  -8  -1   49.70   10.10
 -20   8   1   55.39   11.60
  20   8  -1   51.89   10.50
  20   8  -1   51.99    9.50
 -20   8   1   46.10   10.60
  20   8  -1   51.99   11.30
 -18  -8   1  217.88   17.80
  18  -8  -1  213.78   24.50
  18  -8  -1  247.78   19.70
 -18  -8   1  217.68   16.60
 -18  -8   1  260.77   19.20
  18  -8  -1  213.58   23.60
  18   8  -1  229.88   18.70
 -18   8   1  228.88   21.90
  18   8  -1  245.88   21.10
  18   8  -1  233.38   17.50
 -18   8   1  226.38   22.50
 -16  -8   1  225.58   17.40
  16  -8  -1  232.28   23.00
  16  -8  -1  218.88   22.90
  16  -8  -1  191.28   16.30
 -16  -8   1  232.48   18.20
 -16  -8   1  248.48   16.10
  16  -8  -1  243.18   18.50
 -16   8   1  211.98   20.70
  16   8  -1  282.57   18.10
  16   8  -1  271.37   20.60
  16   8  -1  252.07   16.60
 -16   8   1  206.88   20.50
 -14  -8   1  528.05   22.10
 -14  -8   1  545.95   24.50
 -14  -8   1  514.75   23.60
  14  -8  -1  504.25   21.40
  14  -8  -1  473.75   28.10
  14  -8  -1  512.65   24.20
  14  -8  -1  501.85   28.90
 -14   8   1  456.25   21.30
 -14   8   1  497.45   27.70
  14   8  -1  539.45   24.40
  14   8  -1  559.24   22.50
  14   8  -1  541.35   23.50
 -14   8   1  497.45   21.80
  14   8  -1  531.95   27.00
 -14   8   1  533.65   27.80
  12  -8  -1  208.68   13.00
 -12  -8   1  216.88   15.50
 -12  -8   1  229.58   15.40
 -12  -8   1  221.88   13.90
  12  -8  -1  199.38   16.40
  12  -8  -1  169.18   18.50
  12  -8  -1  200.08   20.10
 -12   8   1  230.98   13.50
  12   8  -1  195.58   14.90
 -12   8   1  215.28   17.70
  12   8  -1  214.58   15.90
  12   8  -1  244.78   14.20
  12   8  -1  187.78   17.20
 -12   8   1  211.98   18.00
 -12   8   1  199.98   13.00
  10  -8  -1   41.30    8.00
  10  -8  -1   39.30    7.40
 -10  -8   1   46.70    6.70
 -10  -8   1   47.30    7.00
 -10  -8   1   61.49   10.20
  10  -8  -1   28.50    8.50
  10  -8  -1   64.49    8.40
 -10   8   1   30.80    5.60
  10   8  -1   46.10    6.70
 -10   8   1   60.99    8.60
  10   8  -1   45.10    7.40
 -10   8   1   33.90    7.30
 -10   8   1   36.30    7.40
  10   8  -1   44.20    8.00
  10   8  -1   63.49    9.70
  -8  -8   1  179.58   11.90
   8  -8  -1  181.38   10.60
   8  -8  -1  187.38   16.10
  -8  -8   1  180.28   12.50
   8  -8  -1  180.78   11.60
   8  -8  -1  197.18   14.20
   8  -8  -1  178.98   13.80
  -8  -8   1  182.98   13.10
   8   8  -1  185.38   12.00
   8   8  -1  166.78   13.70
  -8   8   1  189.58   16.00
  -8   8   1  177.68   14.40
  -8   8   1  189.88   10.90
  -8   8   1  179.68   11.00
   8   8  -1  178.18   13.80
  -8   8   1  180.88   12.20
   6  -8  -1  320.07   13.30
  -6  -8   1  326.87   14.90
   6  -8  -1  316.87   18.00
   6  -8  -1  323.27   16.50
  -6  -8   1  327.27   15.00
   6  -8  -1  328.47   15.90
  -6  -8   1  340.07   15.90
   6   8  -1  323.87   16.50
   6   8  -1  324.47   15.50
  -6   8   1  321.07   15.80
  -6   8   1  321.67   14.60
  -6   8   1  295.57   16.40
  -6   8   1  312.67   19.40
   6   8  -1  335.87   16.80
   6   8  -1  345.47   14.20
   4  -8  -1  346.97   15.30
  -4  -8   1  366.16   14.90
   4  -8  -1  337.87   13.30
  -4  -8   1  374.56   16.40
  -4  -8   1  365.66   14.40
  -4  -8   1  383.86   15.80
   4  -8  -1  343.67   16.30
   4  -8  -1  351.16   17.50
  -4   8   1  339.27   16.20
   4   8  -1  376.46   16.60
  -4   8   1  340.27   15.60
   4   8  -1  369.26   16.80
   4   8  -1  379.46   17.10
  -4   8   1  342.27   15.20
   4   8  -1  381.96   14.20
  -4   8   1  343.07   19.20
   2  -8  -1  123.79    9.90
  -2  -8   1  139.39    8.30
   2  -8  -1  127.89    7.60
   2  -8  -1  137.09   10.60
  -2  -8   1  133.29   10.20
  -2  -8   1  139.39    8.70
  -2  -8   1  147.59   10.00
   2  -8  -1  133.89    9.10
  -2   8   1  133.99    8.40
  -2   8   1  129.99   12.10
   2   8  -1  144.99   10.80
   2   8  -1  147.59    8.20
   2   8  -1  154.48   10.50
   2   8  -1  145.39    9.50
  -2   8   1  138.89    9.50
  -2   8   1  148.19    9.10
  -2   8   1  130.19   10.30
   0  -8   1    0.00    2.50
   0  -8   1    5.40    3.60
   0  -8   1   -0.20    3.30
   0  -8  -1    3.70    2.30
   0  -8  -1    3.60    3.30
   0  -8  -1    0.30    2.80
   0  -8  -1    3.30    3.30
   0  -8   1    4.40    2.20
   0  -8   1    1.40    2.50
   0   8   1    0.30    3.40
   0   8  -1    4.70    3.20
   0   8  -1    3.60    2.70
   0   8  -1    1.90    2.40
   0   8  -1    2.80    2.10
   0   8   1    0.50    2.80
   0   8  -1    2.70    2.80
   0   8   1    2.50    2.90
   0   8   1    2.30    3.00
   2  -8   1    9.00    3.30
   2  -8   1   14.00    4.70
   2  -8   1    9.00    4.30
  -2  -8  -1   15.70    3.20
  -2  -8  -1   11.60    3.80
   2  -8   1   11.50    3.40
  -2  -8  -1   13.10    3.90
  -2  -8  -1   16.70    3.70
  -2   8  -1   15.40    3.60
  -2   8  -1   12.10    3.20
   2   8   1   20.40    3.60
  -2   8  -1   15.80    4.70
   2   8   1    8.20    4.20
   2   8   1   16.00    4.10
  -2   8  -1   13.50    4.00
   2   8   1    9.10    3.70
  -4  -8  -1 1072.89   32.90
  -4  -8  -1 1082.89   32.00
  -4  -8  -1 1065.59   33.70
   4  -8   1 1035.70   34.80
   4  -8   1 1041.60   31.90
  -4  -8  -1 1073.89   33.60
   4  -8   1 1061.49   36.10
  -4   8  -1 1089.39   31.90
  -4   8  -1 1035.70   37.00
   4   8   1 1092.19   36.00
   4   8   1 1088.59   32.50
  -4   8  -1 1048.20   33.70
   4   8   1 1071.99   35.40
  -4   8  -1 1056.29   33.80
   4   8   1 1103.09   35.30
   6  -8   1  721.83   25.70
  -6  -8  -1  755.22   26.10
   6  -8   1  746.03   29.20
  -6  -8  -1  779.92   26.90
   6  -8   1  738.53   27.70
  -6  -8  -1  772.42   25.30
   6  -8   1  696.93   24.70
  -6   8  -1  718.53   26.10
   6   8   1  823.12   29.10
  -6   8  -1  692.33   27.10
   6   8   1  806.22   25.90
   6   8   1  816.82   28.90
  -6   8  -1  728.63   30.00
   8  -8   1  678.03   24.40
  -8  -8  -1  668.93   25.50
   8  -8   1  703.73   29.50
   8  -8   1  699.73   27.60
  -8  -8  -1  677.63   25.70
  -8  -8  -1  702.03   25.20
   8  -8   1  724.13   26.30
  -8   8  -1  705.33   25.10
   8   8   1  691.93   25.10
  -8   8  -1  686.93   29.50
   8   8   1  676.63   27.80
   8   8   1  715.83   25.00
   8   8   1  701.73   27.90
  -8   8  -1  693.43   27.80
  10  -8   1   32.90    7.80
 -10  -8  -1   27.70    6.50
  10  -8   1   32.70    9.30
  10  -8   1   34.40    6.30
 -10  -8  -1   24.00    6.80
 -10  -8  -1   29.60    6.40
  10  -8   1   27.40    8.20
 -10   8  -1   28.50    7.20
 -10   8  -1   30.00    6.10
 -10   8  -1   32.30    5.50
  10   8   1   16.70    6.60
  10   8   1   21.50    6.80
  10   8   1   33.00    6.80
 -10   8  -1   31.50    7.20
  10   8   1   24.50    7.20
  12  -8   1   12.00    5.30
  12  -8   1    7.00    9.10
 -12  -8  -1    8.10    5.90
  12  -8   1   10.80    7.60
 -12  -8  -1   16.30    6.10
 -12  -8  -1    8.50    5.60
  12  -8   1    6.90    9.70
  12   8   1   10.70    6.00
  12   8   1    5.60    6.20
 -12   8  -1   14.70    4.60
  12   8   1    0.40    6.90
 -12   8  -1   16.20    5.70
 -12   8  -1    8.70    6.50
 -12   8  -1   14.00    7.20
  14  -8   1    8.80    7.80
 -14  -8  -1    4.50    6.20
  14  -8   1   18.10    5.90
 -14  -8  -1   14.10    6.40
  14  -8   1    5.10    9.80
 -14  -8  -1   17.20    6.00
 -14   8  -1   12.30    7.30
 -14   8  -1    4.90    7.20
 -14   8  -1   19.10    6.20
  14   8   1   10.70    6.90
  14   8   1   23.60    6.70
  14   8   1   -1.10    7.50
  16  -8   1   95.19   14.90
  16  -8   1  147.39   14.40
 -16  -8  -1  154.98   15.40
 -16  -8  -1  134.89   15.50
 -16  -8  -1  138.69   14.10
  16  -8   1  130.59   17.70
 -16   8  -1  109.89   17.30
 -16   8  -1  164.18   14.70
  16   8   1  157.18   15.00
  16   8   1  156.58   17.90
 -16   8  -1  121.89   18.30
  16   8   1  155.98   16.20
 -18  -8  -1   48.70    9.20
 -18  -8  -1   55.69    9.80
 -18  -8  -1   57.49   10.00
  18  -8   1   58.89    9.60
  18  -8   1   38.80   13.70
  18  -8   1   53.29   11.20
  18   8   1   52.09   10.00
 -18   8  -1   58.79    9.70
 -18   8  -1   52.29   10.80
  18   8   1   62.39   10.30
  18   8   1   49.10   10.70
 -18   8  -1   50.39   11.40
  20  -8   1   45.20   13.90
 -20  -8  -1   41.20    9.20
 -20  -8  -1   48.40    9.80
 -20  -8  -1   31.70    9.70
  20  -8   1   48.00    9.90
  20  -8   1   45.30   11.40
  20   8   1   55.99   11.80
  20   8   1   39.90   10.50
 -20   8  -1   47.60   11.60
 -20   8  -1   41.00   11.50
  20   8   1   49.40   10.20
  22  -8   1  -14.00    9.50
  22  -8   1    0.40   11.60
 -22  -8  -1  -13.30    6.60
 -22  -8  -1   -4.70    7.70
  22   8   1  -10.30    7.50
 -22   8  -1    0.30    8.20
  22   8   1    3.10    9.10
 -22   8  -1   -3.50    8.60
 -23  -9   1   -2.00    8.60
 -23  -9   1    3.20    8.30
  23  -9  -1   26.70   17.90
  23   9  -1  -14.10   11.40
  23   9  -1    4.40   10.50
 -23   9   1   16.00   10.80
  23   9  -1    2.40   10.40
 -23   9   1   13.10   10.30
  21  -9  -1   13.50   12.40
 -21  -9   1  -10.20    7.60
 -21  -9   1    2.20    7.90
  21  -9  -1    7.80    9.60
 -21  -9   1   -5.20    7.30
  21   9  -1  -11.20    7.80
  21   9  -1   -2.00    8.50
 -21   9   1   23.40   10.30
 -21   9   1   11.90    9.00
  21   9  -1   -2.50    9.20
 -19  -9   1  146.19   17.80
  19  -9  -1  210.98   19.60
  19  -9  -1  176.88   24.30
 -19  -9   1  157.88   17.80
 -19  -9   1  155.58   16.40
 -19   9   1  209.48   22.20
  19   9  -1  179.58   21.30
  19   9  -1  174.58   17.30
 -19   9   1  222.08   22.40
  19   9  -1  168.18   18.70
 -17  -9   1  461.25   24.90
 -17  -9   1  444.66   22.40
  17  -9  -1  516.45   25.90
  17  -9  -1  482.55   31.10
 -17  -9   1  453.35   24.40
 -17   9   1  479.95   28.80
 -17   9   1  475.45   29.00
  17   9  -1  439.66   27.60
  17   9  -1  470.25   24.70
  17   9  -1  469.35   23.00
  15  -9  -1  676.73   34.40
  15  -9  -1  694.83   29.30
 -15  -9   1  663.03   27.10
 -15  -9   1  706.53   29.20
  15  -9  -1  651.63   45.90
 -15  -9   1  680.13   29.00
 -15   9   1  624.94   33.10
  15   9  -1  676.43   32.10
  15   9  -1  728.53   28.60
  15   9  -1  669.63   27.30
 -15   9   1  672.93   33.30
 -13  -9   1  322.87   17.10
 -13  -9   1  309.17   18.70
  13  -9  -1  283.37   23.40
  13  -9  -1  297.77   22.00
  13  -9  -1  303.37   19.80
 -13  -9   1  300.37   18.90
  13   9  -1  312.77   20.80
 -13   9   1  292.37   22.60
  13   9  -1  348.27   18.20
  13   9  -1  338.07   17.70
 -13   9   1  297.27   16.60
  13   9  -1  300.27   19.20
 -13   9   1  299.67   21.70
  11  -9  -1   67.19   11.50
  11  -9  -1   75.29   10.10
  11  -9  -1   82.29   10.10
 -11  -9   1  109.29   12.80
 -11  -9   1  117.29   12.10
 -11  -9   1  112.29   11.00
 -11   9   1   91.49   11.00
  11   9  -1  107.99   13.30
  11   9  -1  103.09   13.90
  11   9  -1  114.39   11.30
  11   9  -1  102.39   11.60
 -11   9   1   90.79   14.10
   9  -9  -1  178.68   14.90
  -9  -9   1  173.48   13.10
   9  -9  -1  200.18   12.20
   9  -9  -1  169.88   15.30
   9  -9  -1  170.08   17.30
  -9  -9   1  181.88   14.00
  -9  -9   1  168.78   12.80
  -9   9   1  187.78   15.40
  -9   9   1  198.98   13.30
   9   9  -1  165.48   12.50
   9   9  -1  155.88   14.60
  -9   9   1  185.08   16.90
   9   9  -1  156.38   14.80
   7  -9  -1  309.17   19.70
   7  -9  -1  321.47   14.00
  -7  -9   1  306.97   15.70
  -7  -9   1  299.27   16.10
   7  -9  -1  302.37   17.80
   7  -9  -1  297.87   17.00
  -7  -9   1  295.27   16.70
  -7   9   1  342.37   15.20
   7   9  -1  300.77   15.20
  -7   9   1  342.37   16.50
   7   9  -1  300.17   17.70
  -7   9   1  340.87   20.20
  -7   9   1  341.27   17.90
   7   9  -1  289.07   17.40
  -5  -9   1  717.63   25.30
   5  -9  -1  729.03   27.90
  -5  -9   1  748.03   25.80
  -5  -9   1  758.42   26.80
   5  -9  -1  726.23   26.80
   5  -9  -1  750.02   29.90
  -5  -9   1  740.03   27.60
   5  -9  -1  741.83   24.10
   5   9  -1  770.22   28.80
  -5   9   1  766.42   31.70
  -5   9   1  769.82   26.10
   5   9  -1  774.22   28.20
  -5   9   1  766.72   27.60
  -5   9   1  767.82   27.90
   5   9  -1  773.32   25.20
   5   9  -1  762.02   28.30
  -3  -9   1  619.64   23.30
   3  -9  -1  589.84   25.00
   3  -9  -1  582.44   20.20
  -3  -9   1  634.24   22.00
  -3  -9   1  607.04   21.60
  -3  -9   1  646.74   24.20
   3  -9  -1  578.24   22.30
   3  -9  -1  596.74   24.00
  -3   9   1  617.14   22.60
  -3   9   1  601.74   27.20
   3   9  -1  653.53   25.10
   3   9  -1  659.33   25.50
   3   9  -1  642.04   24.00
   3   9  -1  653.33   21.40
  -3   9   1  625.94   23.00
  -3   9   1  631.14   24.40
  -1  -9   1  192.68   12.60
  -1  -9   1  194.98   12.80
  -1  -9   1  178.28   10.70
   1  -9  -1  152.08   11.30
   1  -9  -1  152.98    9.50
   1  -9  -1  157.58   12.80
  -1  -9   1  188.38   10.80
   1  -9  -1  149.39   12.20
  -1   9   1  169.18   14.40
  -1   9   1  173.68   12.70
   1   9  -1  184.88   13.70
   1   9  -1  199.28   12.10
   1   9  -1  185.28   11.00
   1   9  -1  201.78   10.60
  -1   9   1  168.68   11.70
   1   9  -1  181.88   12.60
  -1   9   1  170.68   11.20
  -1  -9  -1   -1.40    4.20
   1  -9   1    5.30    4.10
   1  -9   1   -2.30    3.30
   1  -9   1   -2.20    3.30
  -1  -9  -1   -4.30    3.00
   1  -9   1    4.70    4.50
  -1  -9  -1   -2.30    3.70
  -1  -9  -1   -0.40    4.10
  -1   9  -1    4.50    3.50
  -1   9  -1    4.50    3.60
   1   9   1    2.40    3.50
  -1   9  -1    2.60    3.60
   1   9   1    3.20    3.70
   1   9   1    6.40    4.10
   1   9   1    3.30    4.00
  -1   9  -1    1.00    2.90
  -1   9  -1    3.50    4.40
  -3  -9  -1  623.74   24.40
   3  -9   1  607.44   22.10
   3  -9   1  623.04   26.10
  -3  -9  -1  640.04   24.40
  -3  -9  -1  646.94   23.20
  -3  -9  -1  636.04   22.00
   3  -9   1  633.74   25.40
   3   9   1  692.13   26.50
  -3   9  -1  649.54   27.70
   3   9   1  660.83   26.10
   3   9   1  683.53   25.60
  -3   9  -1  612.14   23.30
  -3   9  -1  641.64   22.70
   3   9   1  676.13   22.90
  -3   9  -1  637.44   24.50
   5  -9   1  924.21   34.70
  -5  -9  -1  937.21   30.30
  -5  -9  -1  903.61   32.00
  -5  -9  -1  931.41   32.00
   5  -9   1  925.71   33.50
   5  -9   1  902.01   30.10
  -5  -9  -1  932.21   31.20
  -5   9  -1  954.60   32.20
  -5   9  -1  950.30   36.10
   5   9   1  975.90   30.90
   5   9   1  977.00   34.00
   5   9   1  983.30   34.50
  -5   9  -1  970.60   29.80
   5   9   1  957.10   34.10
  -5   9  -1  926.71   32.30
  -7  -9  -1  848.72   30.70
   7  -9   1  878.41   40.40
   7  -9   1  840.32   28.60
  -7  -9  -1  798.82   29.80
   7  -9   1  823.02   32.00
   7  -9   1  856.11   34.00
  -7  -9  -1  821.52   28.60
  -7   9  -1  907.11   30.40
   7   9   1  871.01   29.40
  -7   9  -1  855.71   34.50
  -7   9  -1  865.41   31.90
   7   9   1  860.61   32.80
   7   9   1  847.42   32.70
   9  -9   1  523.65   27.00
   9  -9   1  489.85   20.70
   9  -9   1  484.85   24.50
  -9  -9  -1  499.35   22.30
  -9  -9  -1  481.55   22.10
  -9  -9  -1  520.85   21.20
   9   9   1  491.25   21.60
  -9   9  -1  523.25   26.60
   9   9   1  455.05   24.30
  -9   9  -1  524.45   24.60
  -9   9  -1  540.55   21.50
   9   9   1  500.95   21.80
  -9   9  -1  486.75   20.90
   9   9   1  478.35   24.30
  11  -9   1   20.80    6.00
 -11  -9  -1   26.70    6.50
  11  -9   1   21.50    8.10
 -11  -9  -1   25.80    6.50
 -11  -9  -1   21.40    5.90
  11  -9   1   14.90    9.60
  11   9   1   14.10    6.10
 -11   9  -1   19.00    5.10
  11   9   1   11.00    7.00
 -11   9  -1   20.10    7.20
 -11   9  -1   14.20    7.50
 -11   9  -1   19.00    5.90
  11   9   1   14.80    6.40
 -13  -9  -1   16.90    6.50
 -13  -9  -1   15.50    6.20
  13  -9   1    9.60   10.10
  13  -9   1   23.50    6.10
 -13  -9  -1   12.80    6.00
  13  -9   1    5.50    8.10
 -13   9  -1    9.40    7.20
 -13   9  -1    3.90    7.60
  13   9   1   12.70    7.70
  13   9   1   13.40    6.40
  13   9   1    5.90    6.40
 -13   9  -1   17.70    6.00
  13   9   1   17.80    6.30
 -15  -9  -1  215.78   16.80
 -15  -9  -1  248.58   17.90
  15  -9   1  226.88   24.20
  15  -9   1  238.88   16.60
 -15  -9  -1  240.68   17.90
  15  -9   1  249.28   20.30
 -15   9  -1  208.38   20.90
  15   9   1  201.18   20.20
  15   9   1  234.78   17.50
 -15   9  -1  230.88   18.90
  15   9   1  235.48   18.20
 -15   9  -1  194.28   20.60
  17  -9   1  497.95   26.90
 -17  -9  -1  443.76   24.60
  17  -9   1  432.96   30.60
 -17  -9  -1  435.26   24.10
 -17  -9  -1  430.86   23.40
  17   9   1  429.96   23.70
  17   9   1  418.86   27.70
 -17   9  -1  502.45   30.10
 -17   9  -1  465.15   27.90
  17   9   1  464.55   25.10
  19  -9   1  183.18   25.40
 -19  -9  -1  131.19   18.30
 -19  -9  -1  132.49   18.50
 -19  -9  -1  150.98   16.90
  19  -9   1  203.38   21.20
 -19   9  -1  201.38   22.80
  19   9   1  149.88   19.10
 -19   9  -1  201.98   21.60
  19   9   1  176.98   21.70
  19   9   1  173.28   17.90
  21  -9   1   19.80   10.30
 -21  -9  -1   14.10    8.30
 -21  -9  -1   14.90    9.60
  21  -9   1   34.10   13.70
 -21  -9  -1   -2.30    9.00
 -21   9  -1   34.70   11.00
  21   9   1    8.00   10.40
  21   9   1   22.30    9.50
  21   9   1    6.30   10.10
 -21   9  -1   30.70   11.00
 -22 -10   1    0.70    8.90
 -22 -10   1    8.20    9.40
 -22  10   1   11.70   11.00
 -22  10   1   17.70   12.40
  22  10  -1    9.90   10.10
 -20 -10   1   16.80    9.70
 -20 -10   1   26.40   10.00
  20 -10  -1   60.19   15.10
 -20 -10   1   24.40   10.60
 -20  10   1   43.70   12.40
  20  10  -1   20.40    9.50
  20  10  -1   20.90   11.10
  20  10  -1   33.60   10.70
 -20  10   1   45.20   12.20
 -18 -10   1   51.99   11.00
 -18 -10   1   70.19   10.30
 -18 -10   1   45.80   10.30
  18  10  -1   65.49   11.20
  18  10  -1  106.59   15.70
  18  10  -1   70.09   13.50
 -16 -10   1  136.79   16.30
  16 -10  -1  197.98   18.30
 -16 -10   1  148.29   14.90
 -16 -10   1  148.49   16.90
  16 -10  -1  143.39   22.60
  16  10  -1  128.69   18.80
 -16  10   1  173.58   19.80
 -16  10   1  167.18   20.60
  16  10  -1  163.88   15.60
  16  10  -1  138.19   16.20
 -14 -10   1  295.27   19.50
  14 -10  -1  275.87   24.70
 -14 -10   1  277.67   18.20
 -14 -10   1  269.97   17.30
  14 -10  -1  301.07   20.70
 -14  10   1  277.37   22.80
  14  10  -1  266.47   17.60
  14  10  -1  299.67   18.50
  14  10  -1  288.87   21.60
  14  10  -1  253.27   19.90
 -14  10   1  305.37   22.30
  12 -10  -1   26.80    9.60
  12 -10  -1   34.70    8.40
 -12 -10   1   20.60    7.50
 -12 -10   1   23.00    6.30
 -12 -10   1   26.60    6.80
  12  10  -1   32.30    8.40
 -12  10   1   21.80    8.20
  12  10  -1   29.90    6.80
 -12  10   1   23.00    6.20
 -12  10   1   19.60    7.60
  12  10  -1   22.30    6.90
 -10 -10   1    5.40    4.90
  10 -10  -1    8.50    7.80
 -10 -10   1    5.00    5.20
 -10 -10   1    4.60    5.60
  10 -10  -1    9.00   10.70
  10 -10  -1    9.20    6.60
  10  10  -1    9.30    6.00
 -10  10   1    6.00    5.70
  10  10  -1    6.10    5.40
  10  10  -1    6.60    4.80
 -10  10   1    3.80    6.40
 -10  10   1    2.30    4.90
  -8 -10   1   27.90    6.10
   8 -10  -1   34.00    8.60
  -8 -10   1   19.80    5.60
   8 -10  -1   33.10    7.30
   8 -10  -1   30.90    6.70
  -8 -10   1   23.60    6.40
   8  10  -1   24.50    6.70
  -8  10   1   22.90    6.10
   8  10  -1   18.10    5.70
  -8  10   1   31.10    6.20
   8  10  -1   18.30    6.30
  -8  10   1   25.90    7.30
   6 -10  -1  129.49   15.60
   6 -10  -1  142.29   12.60
  -6 -10   1  104.59   12.40
  -6 -10   1  111.19   11.40
  -6 -10   1  111.79   13.10
   6 -10  -1  132.89   14.10
  -6  10   1  142.69   12.80
  -6  10   1  131.59   15.60
   6  10  -1  128.39   13.40
   6  10  -1  109.09   12.90
  -4 -10   1  325.77   18.40
  -4 -10   1  313.57   17.50
   4 -10  -1  306.27   16.50
   4 -10  -1  306.67   18.30
  -4 -10   1  300.17   16.10
   4 -10  -1  306.77   19.70
  -4 -10   1  250.87   15.80
   4  10  -1  319.07   18.10
   4  10  -1  314.17   19.10
  -4  10   1  319.47   16.30
   4  10  -1  324.57   18.60
  -4  10   1  313.77   17.90
  -4  10   1  304.87   20.30
   4  10  -1  267.67   15.60
   2 -10  -1  130.79   12.00
  -2 -10   1  129.79   13.50
  -2 -10   1  142.19   13.90
   2 -10  -1  119.29   14.10
   2 -10  -1  118.79   10.00
  -2 -10   1  128.09   11.50
   2 -10  -1  113.89   14.50
  -2 -10   1   93.19   11.30
  -2  10   1  140.19   15.20
   2  10  -1  119.19   12.90
   2  10  -1  121.79   14.60
  -2  10   1  134.59   13.20
   2  10  -1   87.19   11.50
  -2  10   1   98.39   12.20
  -2  10   1  142.69   12.50
   2  10  -1  126.59   13.40
   0 -10   1    9.60    4.80
   0 -10  -1   14.30    5.30
   0 -10  -1   -0.60    4.40
   0 -10   1   14.10    4.70
   0 -10  -1    5.40    6.20
   0 -10   1   19.10    6.60
   0 -10  -1    4.60    6.20
   0 -10   1   17.30    6.50
   0  10   1    9.70    5.60
   0  10  -1   10.40    4.90
   0  10   1   13.50    5.60
   0  10  -1    9.70    5.40
   0  10  -1    8.80    6.30
   0  10  -1   11.60    5.40
   0  10   1    9.00    6.00
   0  10   1    9.50    5.30
   2 -10   1   34.00    7.80
  -2 -10  -1   18.50    7.00
  -2 -10  -1   13.90    5.40
  -2 -10  -1    9.70    6.60
   2 -10   1   27.50    5.30
   2 -10   1   29.60    7.30
  -2 -10  -1   22.10    6.00
  -2  10  -1   29.80    7.60
   2  10   1   26.10    6.80
   2  10   1   33.50    7.00
   2  10   1   21.50    6.10
  -2  10  -1   27.80    5.90
   2  10   1   30.70    7.30
  -2  10  -1   27.60    6.60
  -4 -10  -1  127.29   13.20
  -4 -10  -1  102.59   14.30
   4 -10   1  140.79   16.40
   4 -10   1  150.18   11.70
  -4 -10  -1  106.99   11.90
   4 -10   1  137.79   15.20
   4  10   1  113.79   12.80
   4  10   1  160.48   15.00
  -4  10  -1  179.28   11.70
   4  10   1  158.28   16.50
  -4  10  -1  166.58   16.60
   4  10   1  148.69   14.50
  -4  10  -1  169.68   14.30
  -4  10  -1  160.98   12.60
   6 -10   1  244.88   14.00
  -6 -10  -1  190.78   15.80
  -6 -10  -1  211.28   13.90
  -6 -10  -1  198.48   15.60
   6 -10   1  228.48   19.10
  -6 -10  -1  188.08   15.80
   6 -10   1  228.48   17.90
   6  10   1  210.58   15.30
  -6  10  -1  267.77   19.30
   6  10   1  240.48   17.50
  -6  10  -1  255.17   15.90
  -6  10  -1  268.97   15.90
   6  10   1  233.18   17.00
  -8 -10  -1  145.89   14.10
   8 -10   1  177.28   12.40
  -8 -10  -1  172.28   14.40
   8 -10   1  154.28   16.70
  -8 -10  -1  162.38   12.40
   8 -10   1  150.28   18.30
   8  10   1  144.69   15.50
  -8  10  -1  177.28   14.90
  -8  10  -1  182.98   17.40
   8  10   1  169.38   15.80
   8  10   1  145.19   13.60
  -8  10  -1  183.48   13.70
  10 -10   1   18.00    5.30
  10 -10   1    7.50    7.30
 -10 -10  -1   14.60    5.30
 -10 -10  -1    4.60    5.50
  10 -10   1    4.30    8.60
 -10 -10  -1   11.30    6.30
 -10  10  -1   13.10    5.00
  10  10   1    2.60    6.20
  10  10   1   10.10    6.90
 -10  10  -1   13.10    6.20
  10  10   1    5.80    5.50
 -10  10  -1    9.70    6.90
 -12 -10  -1   30.80    7.20
 -12 -10  -1   38.80    7.90
 -12 -10  -1   27.30    6.70
  12 -10   1   45.00    9.60
  12 -10   1   34.00   10.90
  12  10   1   22.00    7.40
  12  10   1   33.90    7.30
 -12  10  -1   34.00    9.00
  12  10   1   36.30    7.50
  12  10   1   32.00    8.40
 -12  10  -1   33.00    6.40
 -12  10  -1   23.50    8.70
 -14 -10  -1  167.48   15.40
  14 -10   1  189.78   19.00
  14 -10   1  153.18   22.10
 -14 -10  -1  167.58   16.00
 -14 -10  -1  148.29   15.40
  14  10   1  168.18   16.00
 -14  10  -1  176.68   19.50
  14  10   1  145.09   18.60
 -14  10  -1  175.68   19.80
  14  10   1  157.18   17.00
  16 -10   1  164.28   19.10
 -16 -10  -1  102.69   16.00
 -16 -10  -1  122.29   15.60
  16 -10   1  135.19   23.00
 -16 -10  -1  113.19   16.70
  16  10   1  134.19   16.20
  16  10   1  116.09   18.70
 -16  10  -1  138.29   20.20
 -16  10  -1  162.38   20.30
  16  10   1  116.99   16.90
 -18 -10  -1   92.99   15.60
  18 -10   1  142.89   19.60
  18 -10   1   84.99   16.00
  18  10   1   63.89   11.50
 -18  10  -1  115.19   20.50
 -18  10  -1  127.29   20.90
  18  10   1  115.99   16.30
  20 -10   1   59.49   15.40
 -20 -10  -1   33.10    9.70
 -20 -10  -1   34.20   11.00
 -20 -10  -1   20.10   10.00
  20  10   1   31.70   10.50
 -20  10  -1   49.60   12.50
 -20  10  -1   48.90   12.80
  20  10   1   34.10   10.90
  20  10   1   40.00   13.70
 -21 -11   1    2.10    9.00
 -21  11   1    6.50   11.00
  21  11  -1    3.50    9.80
 -19 -11   1    7.10    9.60
  19 -11  -1   34.20   14.30
 -19 -11   1   -2.40    8.20
  19  11  -1    9.40    9.50
 -19  11   1    9.70   11.00
  19  11  -1    0.40   11.00
 -19  11   1   12.50   10.80
  17 -11  -1    7.50   12.00
 -17 -11   1   -7.60    7.00
 -17 -11   1   -5.20    8.40
 -17 -11   1   -6.10    7.60
  17 -11  -1   20.20    9.40
  17  11  -1   11.00    7.50
  17  11  -1    4.80    9.50
 -17  11   1    5.00    9.50
 -17  11   1    8.00    8.80
  17  11  -1   -6.50    8.00
  15 -11  -1   16.50   11.30
 -15 -11   1   16.10    7.20
 -15 -11   1   13.00    7.70
  15 -11  -1   23.40    9.10
 -15 -11   1   21.30    8.50
  15  11  -1   25.00    8.60
 -15  11   1   25.90    9.10
 -15  11   1   29.30    9.20
  15  11  -1   25.80    9.10
 -13 -11   1   -0.60    5.30
 -13 -11   1   -7.10    5.10
  13 -11  -1  -12.50    8.20
 -13 -11   1    4.30    6.70
  13 -11  -1   -2.40    7.10
  13  11  -1   -3.10    6.40
  13  11  -1   -5.80    5.60
 -13  11   1    5.80    6.40
  13  11  -1   -5.10    5.80
 -13  11   1    6.80    4.90
 -13  11   1   -1.70    6.20
  11 -11  -1   -6.00    7.80
 -11 -11   1   -4.90    5.80
 -11 -11   1   -6.40    4.90
  11 -11  -1   -1.00    6.90
 -11 -11   1   -2.90    5.20
  11  11  -1    0.10    6.10
 -11  11   1   -1.10    8.00
 -11  11   1    1.20    6.40
  11  11  -1   -2.60    5.80
  11  11  -1   -8.40    5.00
 -11  11   1   -0.40    4.50
   9 -11  -1    5.80    6.40
  -9 -11   1   -5.90    5.30
  -9 -11   1    0.00    5.30
   9 -11  -1   -1.10    7.20
  -9 -11   1   -7.20    4.70
   9  11  -1   -5.40    4.70
   9  11  -1   -7.70    5.20
  -9  11   1   -8.90    4.40
   9  11  -1   -5.80    5.20
  -9  11   1    6.10    6.60
  -7 -11   1   64.89    8.10
   7 -11  -1  110.09   14.20
  -7 -11   1   84.09   12.00
   7 -11  -1   94.19   15.00
  -7 -11   1   99.39   13.90
  -7 -11   1   93.59   11.60
   7  11  -1   77.29   11.30
  -7  11   1   90.89   12.60
  -7  11   1   66.69   10.60
   7  11  -1   96.99   13.50
   7  11  -1  100.69   13.80
  -5 -11   1   54.19    7.30
  -5 -11   1   32.60    7.10
  -5 -11   1   58.99    8.90
   5 -11  -1   59.09    9.70
  -5 -11   1   50.09    8.40
   5 -11  -1   77.59   12.80
   5  11  -1   46.60    8.30
   5  11  -1   56.29    9.20
   5  11  -1   33.20    7.20
  -5  11   1   41.40    9.00
  -5  11   1   65.29   10.20
  -5  11   1   60.49    8.80
  -3 -11   1   33.30    8.10
  -3 -11   1   29.30    6.50
  -3 -11   1   17.80   10.70
  -3 -11   1   33.20    7.90
   3 -11  -1   33.60    7.80
   3 -11  -1   42.40    8.70
  -3  11   1   27.60    8.00
  -3  11   1   26.80    7.30
   3  11  -1   33.10    8.00
   3  11  -1   30.80    8.10
  -3  11   1   34.20    6.70
   3  11  -1   33.20    7.70
   1 -11  -1  198.68   17.40
  -1 -11   1  168.18   13.40
   1 -11  -1  208.98   17.80
  -1 -11   1  151.58   16.90
  -1 -11   1  175.18   17.30
   1  11  -1  138.09   15.50
  -1  11   1  129.49   15.00
   1  11  -1  139.29   17.90
  -1  11   1  164.48   16.40
  -1  11   1  154.28   15.30
   1  11  -1  150.38   16.40
  -1  11   1  192.28   18.70
  -1 -11  -1   30.90    8.60
  -1 -11  -1   41.80    7.20
   1 -11   1   43.40    9.30
   1 -11   1   42.10    8.80
  -1 -11  -1   32.10    8.60
   1  11   1   26.20    7.20
  -1  11  -1   32.90    7.10
   1  11   1   30.30    8.20
   1  11   1   24.80    7.60
  -1  11  -1   24.00    8.30
   1  11   1   37.40    8.00
  -1  11  -1   21.00    7.40
   3 -11   1   47.30    9.70
  -3 -11  -1   15.20    8.50
  -3 -11  -1   25.50    8.30
  -3 -11  -1   26.70    8.30
   3 -11   1   29.60    8.30
  -3 -11  -1   37.30    7.60
   3  11   1   32.80    7.50
  -3  11  -1   40.80    6.70
  -3  11  -1   29.50    7.50
   3  11   1   40.60    8.50
   3  11   1   41.40    8.50
  -3  11  -1   35.00    9.20
   3  11   1   31.20   10.90
   5 -11   1   41.20    9.30
  -5 -11  -1   37.50    8.50
  -5 -11  -1   31.90    7.30
  -5 -11  -1   41.90    6.80
   5 -11   1   41.50    8.70
  -5 -11  -1   39.90    8.70
   5  11   1   35.50    7.40
  -5  11  -1   36.70    8.50
  -5  11  -1   41.30    7.60
   5  11   1   48.90    9.10
   5  11   1   50.79    9.10
  -7 -11  -1   22.30    7.00
  -7 -11  -1   34.60    7.90
  -7 -11  -1   34.50    7.80
  -7 -11  -1   37.00    6.60
   7 -11   1   40.10    8.80
   7 -11   1   43.40    9.80
   7  11   1   34.80    8.10
  -7  11  -1   33.40    8.30
  -7  11  -1   35.40    7.10
   7  11   1   37.10    7.30
   7  11   1   35.10    8.40
  -9 -11  -1   28.20    7.60
  -9 -11  -1   37.40    7.90
   9 -11   1   30.70    8.80
   9 -11   1   35.30   10.00
  -9 -11  -1   35.50    6.70
  -9  11  -1   34.80    7.60
   9  11   1   46.10    9.30
  -9  11  -1   30.70    8.60
  -9  11  -1   32.00    6.50
   9  11   1   28.10    7.10
   9  11   1   42.30    8.70
  11 -11   1   -6.00    8.80
  11 -11   1   -9.80    7.30
 -11 -11  -1   -7.80    6.20
 -11 -11  -1   -5.90    4.70
 -11  11  -1   -1.80    6.50
 -11  11  -1    2.80    6.00
  11  11   1   -3.80    5.60
  11  11   1  -12.20    5.70
  11  11   1   -2.00    6.60
 -11  11  -1    3.90    4.40
  13 -11   1   -1.40    8.40
 -13 -11  -1    0.10    6.50
  13 -11   1   -1.10    9.70
 -13 -11  -1    1.90    5.70
 -13 -11  -1   -8.20    6.20
 -13  11  -1    3.50    6.50
  13  11   1   -5.80    6.30
 -13  11  -1    9.80    7.60
  13  11   1   -2.10    7.50
  13  11   1   -9.70    6.50
 -15 -11  -1   -5.00    6.90
 -15 -11  -1   -4.70    7.70
 -15 -11  -1   -2.80    6.80
  15 -11   1   18.30   11.90
  15 -11   1    8.00    8.70
  15  11   1    3.50    7.30
 -15  11  -1   -0.40    8.20
  15  11   1   -5.30    7.90
  15  11   1   -0.80    8.40
 -15  11  -1    1.10    8.00
 -17 -11  -1   -3.30    7.10
 -17 -11  -1  -17.00    8.50
  17 -11   1   19.20   12.60
 -17 -11  -1  -15.50    7.40
  17 -11   1   13.80    9.60
  17  11   1   -4.40    8.60
 -17  11  -1    1.00    9.70
 -17  11  -1    3.80    9.50
  17  11   1   -0.20    9.60
  17  11   1    5.30    7.90
 -19 -11  -1    7.80    9.10
 -19 -11  -1   -0.10    9.80
 -19 -11  -1   11.20    9.20
  19 -11   1   29.10   10.80
  19 -11   1   33.50   14.80
  19  11   1   20.70   10.20
 -19  11  -1   11.00   11.20
  19  11   1   16.60   12.00
 -19  11  -1    8.70   10.70
  19  11   1   15.80   10.30
 -18 -12   1  124.59   18.70
 -18 -12   1  129.39   20.20
  18 -12  -1  106.49   18.50
  18 -12  -1  129.49   21.10
 -18  12   1  138.49   24.40
  18  12  -1  142.29   19.60
 -18  12   1   87.29   18.10
  18  12  -1   78.79   15.10
  16 -12  -1  180.58   25.90
 -16 -12   1  145.49   20.60
  16 -12  -1  189.88   22.10
 -16 -12   1  120.49   18.60
  16  12  -1  171.78   22.30
  16  12  -1  172.28   19.70
 -16  12   1  184.98   24.60
  14 -12  -1  249.58   25.40
 -14 -12   1  222.28   19.30
 -14 -12   1  244.08   19.30
 -14 -12   1  233.68   21.10
  14 -12  -1  258.67   22.20
  14  12  -1  250.77   23.20
  14  12  -1  268.77   20.20
  14  12  -1  227.98   21.60
 -14  12   1  249.78   25.20
 -12 -12   1   36.30    9.00
 -12 -12   1   30.30    7.70
  12 -12  -1   32.80   11.10
 -12 -12   1   37.30    8.30
  12 -12  -1   36.20    9.70
  12  12  -1   26.00    8.20
 -12  12   1   30.30    9.90
  12  12  -1   39.10   10.20
  12  12  -1   23.50    8.70
 -12  12   1   26.10    7.30
  10 -12  -1    1.50    7.00
 -10 -12   1   -1.90    5.40
  10 -12  -1   -6.20    8.20
 -10 -12   1  -11.70    5.40
 -10 -12   1   -6.20    5.90
 -10  12   1    4.40    7.10
 -10  12   1   -1.20    5.20
  10  12  -1   -8.90    6.50
  10  12  -1   -9.60    6.40
  -8 -12   1  171.68   16.20
  -8 -12   1  192.28   15.20
  -8 -12   1  193.88   18.20
   8 -12  -1  260.97   19.60
   8 -12  -1  246.78   20.60
   8  12  -1  200.58   18.70
   8  12  -1  193.18   18.30
   8  12  -1  206.38   19.10
  -8  12   1  225.68   21.00
  -8  12   1  238.28   17.20
  -6 -12   1  224.18   15.50
  -6 -12   1  217.78   17.00
   6 -12  -1  246.08   20.50
  -6 -12   1  222.88   18.40
   6 -12  -1  251.47   19.00
   6  12  -1  220.88   18.20
   6  12  -1  221.28   19.20
  -6  12   1  222.98   20.80
  -6  12   1  227.68   17.30
  -4 -12   1  422.76   20.20
   4 -12  -1  490.75   24.50
   4 -12  -1  452.85   25.30
  -4 -12   1  440.56   22.80
  -4 -12   1  457.45   24.20
   4  12  -1  443.96   23.40
  -4  12   1  490.45   26.10
  -4  12   1  452.85   23.60
   4  12  -1  438.36   24.70
  -4  12   1  444.66   27.20
  -2 -12   1    4.60    6.40
   2 -12  -1    7.70    7.30
  -2 -12   1    6.30    6.70
  -2 -12   1    4.80    9.10
   2 -12  -1    3.70    7.10
   2  12  -1    3.60    6.10
   2  12  -1    9.00    6.20
   2  12  -1   11.30    6.80
  -2  12   1    1.70    5.60
  -2  12   1   10.00    7.00
  -2  12   1    3.20    5.90
   0 -12   1    9.00    6.90
   0 -12  -1    7.60    7.00
   0 -12   1    8.50    7.10
   0 -12  -1    7.50    7.10
   0  12   1    5.30    6.70
   0  12  -1    0.00    6.10
   0  12   1    8.20    6.20
   0  12   1    0.40    6.20
   0  12  -1   -2.80    6.40
   0  12   1    8.50    6.00
   0  12  -1    0.80    5.60
  -2 -12  -1   24.70    7.80
  -2 -12  -1   24.30    8.40
   2 -12   1   13.00    8.10
  -2 -12  -1   27.60    6.60
   2 -12   1   20.10    8.10
   2  12   1   29.60    6.80
  -2  12  -1   15.70    8.60
   2  12   1   26.20    7.70
   2  12   1   23.60    7.60
  -2  12  -1   13.10    8.00
  -2  12  -1   14.10    6.90
  -4 -12  -1  428.96   23.00
  -4 -12  -1  455.15   23.80
   4 -12   1  450.95   25.00
   4 -12   1  412.66   25.30
  -4 -12  -1  441.06   21.50
   4  12   1  444.96   25.20
  -4  12  -1  428.36   23.20
   4  12   1  474.75   20.90
   4  12   1  433.96   24.30
  -4  12  -1  429.36   26.80
  -6 -12  -1  318.77   21.20
   6 -12   1  327.87   23.30
  -6 -12  -1  301.47   20.00
   6 -12   1  366.56   22.60
  -6 -12  -1  328.27   19.20
   6  12   1  345.77   22.90
  -6  12  -1  321.87   24.30
  -6  12  -1  346.57   20.20
   6  12   1  355.06   18.90
   6  12   1  310.67   21.60
  -8 -12  -1  257.87   18.50
   8 -12   1  297.07   23.20
   8 -12   1  298.17   22.10
  -8 -12  -1  260.77   20.30
  -8 -12  -1  241.18   18.80
   8  12   1  270.57   21.50
   8  12   1  296.87   18.40
   8  12   1  267.37   21.30
  -8  12  -1  302.77   18.60
  -8  12  -1  277.97   23.10
  10 -12   1  145.99   20.30
 -10 -12  -1  120.69   16.00
 -10 -12  -1   99.59   15.60
  10 -12   1  162.18   19.10
 -10 -12  -1  137.79   16.60
 -10  12  -1  170.28   14.90
  10  12   1  126.69   15.50
  10  12   1  109.49   17.30
  10  12   1  128.69   18.00
 -10  12  -1  150.08   19.40
 -12 -12  -1    9.90    7.80
 -12 -12  -1   16.00    7.20
  12 -12   1   24.20   11.40
 -12 -12  -1   18.50    8.60
  12 -12   1   20.70    9.80
 -12  12  -1   12.90    8.90
  12  12   1   14.40    9.20
  12  12   1    6.20    8.30
 -12  12  -1   15.10    6.70
  12  12   1    1.30    7.90
  14 -12   1   14.70    9.70
 -14 -12  -1   -0.60    8.80
 -14 -12  -1    7.50    7.80
 -14 -12  -1    2.20    7.30
  14 -12   1   18.50   12.00
  14  12   1   -2.90    8.70
  14  12   1   12.70    9.80
 -14  12  -1    4.80    9.60
 -14  12  -1    0.50    8.70
 -16 -12  -1    5.20    9.90
 -16 -12  -1   11.00    8.20
 -16 -12  -1    3.80    7.80
  16 -12   1   30.70   13.70
  16 -12   1   23.90   10.40
  16  12   1   11.70   10.40
 -16  12  -1   13.80   10.30
  16  12   1    6.70    9.00
 -16  12  -1    4.40    9.70
 -18 -12  -1   64.19   11.30
 -18 -12  -1   61.79   11.60
  18  12   1   60.09   11.60
  18  12   1   67.49   12.20
 -18  12  -1   64.89   14.20
 -17 -13   1  213.88   20.60
  17 -13  -1  214.68   25.00
  17  13  -1  241.98   25.60
  15 -13  -1  111.89   17.90
 -15 -13   1  132.49   18.20
 -15 -13   1  155.78   21.20
  15 -13  -1  170.68   22.50
  15  13  -1  123.59   22.60
 -15  13   1  191.18   25.40
  13 -13  -1  242.88   23.20
 -13 -13   1  186.38   19.30
 -13 -13   1  188.08   28.50
 -13 -13   1  224.18   22.80
  13 -13  -1  227.48   25.50
 -13  13   1  220.98   19.70
  13  13  -1  210.48   22.30
 -13  13   1  192.98   25.90
  13  13  -1  208.38   24.10
  11 -13  -1   15.80   10.70
 -11 -13   1   -3.00    8.10
 -11 -13   1    4.60    8.90
 -11 -13   1   -1.70    7.30
  11 -13  -1   12.40    9.10
 -11  13   1   -0.40    7.20
  11  13  -1    1.80    9.00
  11  13  -1   -3.60    8.20
 -11  13   1   -2.00    8.60
  -9 -13   1   30.80    8.70
   9 -13  -1   56.59   10.70
  -9 -13   1   28.60    9.10
   9 -13  -1   58.49   12.40
  -9  13   1   37.30   11.10
   9  13  -1   20.90    9.20
   9  13  -1   36.60   10.30
  -9  13   1   36.70    8.80
  -7 -13   1   99.49   16.30
   7 -13  -1   66.59   12.00
  -7 -13   1   86.09   14.60
  -7  13   1   99.79   14.90
   7  13  -1   59.99   10.60
   7  13  -1   50.99   10.10
  -7  13   1   96.79   17.80
  -5 -13   1  553.44   26.90
   5 -13  -1  629.04   29.70
  -5 -13   1  576.74   28.60
   5 -13  -1  605.54   30.80
  -5  13   1  599.44   32.00
   5  13  -1  565.14   28.00
  -5  13   1  616.34   28.30
   5  13  -1  530.95   28.70
  -3 -13   1   12.40    7.60
  -3 -13   1    9.50    7.10
   3 -13  -1   -5.20    7.70
   3 -13  -1   -0.20    7.80
  -3  13   1    4.70    6.30
  -3  13   1    5.40    6.80
   3  13  -1    8.70    6.10
   3  13  -1    4.10    6.90
  -1 -13   1   47.10    9.50
   1 -13  -1   59.39   10.60
  -1 -13   1   57.29   10.00
   1 -13  -1   53.99   10.30
  -1  13   1   54.09   10.20
   1  13  -1   69.29   12.70
  -1  13   1   61.79   10.00
   1  13  -1   47.20    9.80
   1  13  -1   53.49    9.40
  -1  13   1   70.19   12.70
  -1 -13  -1  161.68   17.70
   1 -13   1  138.69   17.30
   1 -13   1  112.59   17.60
  -1 -13  -1  153.08   17.10
  -1  13  -1  137.29   18.30
  -1  13  -1  122.89   15.90
   1  13   1  170.88   17.20
   1  13   1  172.98   16.40
   3 -13   1   41.70   10.50
  -3 -13  -1   51.09   10.10
   3 -13   1   45.30   10.10
  -3 -13  -1   46.20    9.40
   3  13   1   52.79    9.50
  -3  13  -1   47.70    8.90
   3  13   1   51.59    9.30
  -3  13  -1   42.40   10.00
  -5 -13  -1  392.86   23.20
   5 -13   1  369.06   25.70
  -5 -13  -1  393.66   24.00
   5 -13   1  408.06   25.80
  -5  13  -1  377.26   22.60
  -5  13  -1  396.36   27.30
   5  13   1  410.96   24.60
   5  13   1  385.26   24.60
  -7 -13  -1  406.96   27.40
  -7 -13  -1  372.36   23.30
   7 -13   1  416.36   27.40
   7 -13   1  446.16   26.70
  -7 -13  -1  401.16   24.70
  -7  13  -1  435.26   23.80
   7  13   1  395.96   25.60
  -7  13  -1  398.06   27.90
   7  13   1  376.36   25.60
   7  13   1  428.36   22.40
   9 -13   1  221.98   21.80
  -9 -13  -1  162.88   18.00
  -9 -13  -1  165.38   18.60
  -9 -13  -1  164.98   19.30
   9 -13   1  242.38   23.60
   9  13   1  173.98   17.50
  -9  13  -1  187.28   22.30
   9  13   1  154.58   20.10
  -9  13  -1  185.98   17.50
   9  13   1  151.18   20.20
 -11 -13  -1   62.99   10.80
 -11 -13  -1   65.39   11.30
 -11 -13  -1   67.59   12.00
  11  13   1   64.19   13.20
 -11  13  -1   67.29   10.10
  11  13   1   68.69   11.10
 -11  13  -1   66.89   13.10
  11  13   1   50.59   11.40
 -13 -13  -1    8.50    8.20
  13 -13   1    5.40    9.60
  13 -13   1   15.20   12.10
 -13 -13  -1   -4.30    9.40
 -13 -13  -1   -6.50    8.10
  13  13   1   -2.90    9.00
 -13  13  -1    1.50    9.80
  13  13   1    3.90   10.20
  13  13   1   -4.40    8.40
  15 -13   1   24.30   13.30
 -15 -13  -1   -1.50    9.90
 -15 -13  -1    2.60    8.60
  15 -13   1   18.50   11.30
  15  13   1   -4.50    8.80
 -15  13  -1    6.60   10.70
  15  13   1   11.00   12.40
  14 -14  -1   -2.20   10.30
  14 -14  -1   16.50   16.40
  14  14  -1   -2.70    8.90
 -12 -14   1   22.00   11.30
  12 -14  -1   33.20   11.80
  12 -14  -1   44.20   14.10
  12  14  -1   22.20   11.40
 -12  14   1   24.20   11.40
 -12  14   1   19.40    8.30
  12  14  -1   23.60   10.70
  10 -14  -1    6.90   10.00
 -10 -14   1   -7.50    9.20
 -10 -14   1    2.20   11.40
  10 -14  -1    6.70   11.50
 -10  14   1    1.80    9.40
  10  14  -1    2.10    9.10
 -10  14   1   -4.20    7.50
  10  14  -1   -9.10    8.10
  -8 -14   1   -3.80    7.30
   8 -14  -1    1.20    9.00
   8 -14  -1   -4.10    9.80
  -8 -14   1   -1.10    9.10
   8  14  -1  -13.50    7.50
   8  14  -1   -4.00    7.60
  -8  14   1   -9.70    7.50
  -8  14   1   -8.70    6.70
   6 -14  -1    7.60    9.20
   6 -14  -1   20.00   10.70
  -6 -14   1   18.70    9.40
  -6 -14   1    9.90    7.90
   6  14  -1    3.60    8.00
  -6  14   1    6.10    7.40
   6  14  -1   13.30    7.70
  -6  14   1   14.40    8.80
   4 -14  -1   15.60    9.20
   4 -14  -1    7.50    9.20
  -4 -14   1    9.30    8.60
  -4 -14   1    6.10    7.80
  -4  14   1    5.30    7.00
   4  14  -1    8.70    7.40
   4  14  -1   -2.00    7.10
  -4  14   1    6.40    7.30
   2 -14  -1   -8.60    8.00
  -2 -14   1   -7.40    8.00
   2 -14  -1    0.90    8.40
  -2 -14   1   -9.00    7.10
  -2  14   1    1.80    6.70
   2  14  -1   -5.70    6.20
  -2  14   1    4.00    6.40
   2  14  -1   -0.50    7.00
   0 -14  -1   -5.40    8.30
   0 -14  -1    2.40    8.10
   0 -14   1   -5.60    8.00
   0 -14   1   -7.30    8.40
   0  14   1    2.60    6.20
   0  14  -1    2.50    6.50
   0  14  -1    5.90    6.90
   0  14   1    1.20    6.10
  -2 -14  -1   61.99   11.80
   2 -14   1   55.69   12.00
   2 -14   1   60.09   11.90
  -2 -14  -1   63.99   11.10
  -2  14  -1   92.29   15.90
  -2  14  -1   90.29   17.40
   2  14   1  106.39   16.90
   2  14   1   86.59   15.80
  -4 -14  -1   -3.10    8.30
   4 -14   1    2.50    9.10
   4 -14   1    0.40    9.20
  -4 -14  -1    0.50    7.90
   4  14   1    6.40    7.40
   4  14   1    5.50    7.20
  -4  14  -1   -2.10    6.50
  -4  14  -1   10.70    8.00
  -6 -14  -1    8.50    8.80
   6 -14   1    4.20    9.90
  -6 -14  -1    4.70    8.10
   6 -14   1    7.90   10.40
  -6  14  -1    4.80    7.00
   6  14   1    6.20    8.20
  -6  14  -1    5.70    8.60
   6  14   1    6.50    8.50
   8 -14   1   72.39   13.10
   8 -14   1   58.49   13.60
  -8 -14  -1   50.19   11.20
  -8 -14  -1   55.49   10.80
  -8  14  -1   48.90   11.40
   8  14   1   46.30   11.40
  -8  14  -1   64.99   10.60
   8  14   1   47.50   11.30
 -10 -14  -1   18.40   10.50
  10 -14   1   40.10   11.80
  10 -14   1   33.30   13.00
 -10 -14  -1   23.20    9.20
  10  14   1    3.80    9.30
  10  14   1    2.60    9.80
 -10  14  -1   16.30    8.20
 -10  14  -1   16.70   10.10
  12 -14   1   26.40   11.50
  12 -14   1   22.70   12.90
 -12 -14  -1   10.50    8.70
 -12 -14  -1   -6.90   10.10
 -12  14  -1   18.10   10.60
  12  14   1    3.50    9.80
  12  14   1    6.70   10.80
  11 -15  -1   -2.80   14.80
  11 -15  -1   -8.40    9.90
 -11  15   1   -0.60    7.40
  11  15  -1   -5.10    8.90
 -11  15   1    6.10   15.90
  11  15  -1   -3.70   10.00
  -9 -15   1   -4.30   11.10
   9 -15  -1    7.70   10.30
   9 -15  -1   15.00   11.90
  -9  15   1   19.20    8.60
   9  15  -1    8.90    9.10
   9  15  -1    7.70    9.30
  -9  15   1   13.50   10.30
   7 -15  -1   62.19   13.90
  -7 -15   1   55.69   13.20
   7 -15  -1   74.59   13.50
  -7 -15   1   58.89   15.90
  -7  15   1  115.99   18.40
  -7  15   1   64.99   13.10
   7  15  -1  113.39   19.00
   7  15  -1   68.69   12.70
  -5 -15   1   48.40   12.60
   5 -15  -1   57.49   12.30
  -5 -15   1   63.69   11.80
   5 -15  -1   48.90   13.00
   5  15  -1   62.39   11.50
  -5  15   1   46.10   10.70
  -5  15   1   55.89   12.30
   5  15  -1   62.39   11.50
   3 -15  -1   25.70   10.70
  -3 -15   1   33.80   10.50
   3 -15  -1   31.50   11.10
  -3 -15   1   37.60   11.60
  -3  15   1   25.70    9.40
  -3  15   1   24.40   10.00
   3  15  -1   36.20    9.80
   3  15  -1   39.40    9.80
   1 -15  -1   53.09   12.00
  -1 -15   1   42.10   11.40
   1 -15  -1   49.60   12.10
  -1 -15   1   31.20   11.80
   1  15  -1   44.80   10.10
  -1  15   1   40.10   10.60
  -1 -15  -1   21.40    9.80
   1 -15   1   14.30   10.80
   1 -15   1   12.90   10.30
  -1 -15  -1   12.40    9.80
  -1  15  -1   16.70   13.40
   1  15   1    8.80    8.20
  -1  15  -1   12.70    8.70
   1  15   1   13.10    8.80
   3 -15   1  -10.70    9.00
   3 -15   1   -0.90    9.30
  -3 -15  -1  -10.10    8.90
  -3 -15  -1   -1.10    8.10
  -3  15  -1   -8.30    7.60
   3  15   1   -7.20    7.60
   3  15   1   -2.60    7.40
  -5 -15  -1    6.30    8.60
  -5 -15  -1    6.30   10.10
   5 -15   1    2.70    9.70
   5 -15   1    9.30   10.10
   5  15   1    5.70    8.40
  -5  15  -1    7.20    9.00
   5  15   1   11.20    8.80
  -5  15  -1    4.90    7.40
   7 -15   1   18.60   12.20
  -7 -15  -1   11.00    9.20
   7 -15   1    8.30   11.00
  -7 -15  -1   -4.40    9.50
   7  15   1    7.40    9.40
   7  15   1   10.00    9.40
  -7  15  -1    7.30    7.80
  -7  15  -1    8.60    8.60
  -9 -15  -1    9.30    9.00
   9 -15   1   14.70   11.10
  -9 -15  -1   -7.90   15.30
   9 -15   1   12.10   12.30
   9  15   1   17.90   10.30
   9  15   1   14.20   10.50
  -9  15  -1   19.30    8.70
  -9  15  -1   20.20   10.40
   6 -16  -1  168.58   24.50
   6 -16  -1  183.68   24.80
  -6  16   1  154.08   24.70
   6  16  -1  153.98   21.60
   4 -16  -1   78.09   14.70
  -4  16   1   62.39   17.20
   2 -16  -1   81.29   13.80
  -2 -16   1  134.49   20.60
  -2 -16   1   86.59   18.50
   2 -16  -1  127.99   21.70
  -2  16   1   50.99   18.70
   0 -16   1   66.79   14.40
   0 -16  -1   66.99   13.20
   0 -16   1   70.59   13.30
   0 -16  -1   65.99   12.90
   0  16   1   32.60   19.10
   0  16  -1   46.60   18.40
   2 -16   1    2.50   10.40
  -2 -16  -1    3.10   10.70
  -2 -16  -1    8.40    9.50
   2 -16   1    1.70   10.80
  -2  16  -1  -23.50   13.50
   2  16   1   -3.60   14.40
   4 -16   1   38.50   16.90
  -4 -16  -1   33.70   10.90
   4 -16   1   37.90   11.60
   4  16   1   13.40   10.30
  -4  16  -1   23.40   10.50
 -28   0   2   -2.10    9.80
 -28   0   2    5.70    9.30
  28   0  -2    5.60   10.00
  28   0  -2   -2.10   11.60
  26   0  -2   19.10   10.20
 -26   0   2   24.50    9.90
  26   0  -2   29.90    9.80
 -26   0   2   23.00    8.80
 -26   0   2   10.10    9.10
  26   0  -2   21.20   11.70
 -24   0   2  344.07   21.10
 -24   0   2  374.66   24.50
  24   0  -2  375.06   24.70
 -24   0   2  355.56   27.70
  24   0  -2  351.16   23.40
  24   0  -2  339.47   26.60
 -22   0   2  870.21   33.00
 -22   0   2  917.61   36.90
 -22   0   2  940.21   41.10
  22   0  -2  857.71   38.20
  22   0  -2  933.01   34.60
  22   0  -2  914.51   35.80
  20   0  -2 1284.47   42.50
 -20   0   2 1235.78   40.10
  20   0  -2 1140.39   43.30
  20   0  -2 1279.17   41.10
 -20   0   2 1255.67   43.80
 -20   0   2 1272.37   48.10
  20   0  -2 1230.28   45.20
 -18   0   2 1176.78   40.20
 -18   0   2 1178.28   38.20
  18   0  -2 1080.59   39.60
  18   0  -2 1132.29   41.20
 -18   0   2 1150.98   37.00
  18   0  -2 1185.18   39.20
 -18   0   2 1218.68   44.40
  18   0  -2 1195.88   37.60
  16   0  -2  586.44   22.90
  16   0  -2  574.14   21.70
 -16   0   2  568.94   24.00
  16   0  -2  561.34   23.90
 -16   0   2  580.74   21.50
  16   0  -2  604.34   25.40
 -16   0   2  565.34   26.80
 -16   0   2  606.34   21.70
 -14   0   2    9.90    4.80
  14   0  -2    7.70    4.30
  14   0  -2   10.30    4.50
 -14   0   2   11.10    3.60
 -14   0   2   15.30    4.80
 -14   0   2   12.80    3.50
  14   0  -2    7.90    3.80
  14   0  -2   10.00    5.30
 -12   0   2  614.14   24.40
 -12   0   2  582.54   19.10
  12   0  -2  574.54   21.60
  12   0  -2  593.54   20.30
 -12   0   2  592.64   21.60
  12   0  -2  556.04   19.00
 -12   0   2  606.04   20.20
  12   0  -2  579.64   22.00
  10   0  -2  755.12   24.70
  10   0  -2  726.53   21.90
  10   0  -2  742.83   24.80
 -10   0   2  755.92   23.30
 -10   0   2  764.62   24.40
 -10   0   2  770.42   26.80
  10   0  -2  731.53   22.90
 -10   0   2  736.23   22.00
   8   0  -2  998.60   29.60
  -8   0   2  996.10   29.00
   8   0  -2  957.40   27.80
  -8   0   2 1008.90   31.30
   8   0  -2 1032.70   29.80
  -8   0   2  997.30   27.10
   8   0  -2  971.10   27.00
  -8   0   2 1005.90   28.30
  -6   0   2  200.28    9.50
  -6   0   2  205.58    8.00
  -6   0   2  188.98    6.60
  -6   0   2  210.98    8.30
   6   0  -2  205.58    9.50
   6   0  -2  188.98    6.70
   6   0  -2  197.58    7.70
  -6   0   2  200.28    6.70
   6   0  -2  209.88    9.10
   6   0  -2  193.08    6.70
   4   0  -2 4926.71  124.89
   4   0  -2 5087.69  124.99
  -4   0   2 5104.29  126.69
  -4   0   2 5028.70  125.69
   4   0  -2 5206.78  126.39
   4   0  -2 5063.39  126.29
  -4   0   2 5172.18  125.49
  -4   0   2 4941.41  124.89
  -2   0   2 1538.25   39.50
   2   0  -2 1615.64   40.40
   2   0  -2 1602.14   39.70
   2   0  -2 1620.74   40.00
  -2   0   2 1519.55   40.00
  -2   0   2 1530.15   39.20
  -2   0   2 1509.25   39.80
   0   0   2 8403.16  207.48
   0   0  -2 8091.39  207.58
   0   0  -2 8464.75  207.68
   0   0   2 8541.15  208.48
   0   0   2 8500.65  207.98
   0   0   2 8467.85  207.28
   0   0   2 8408.36  208.58
   0   0   2 8264.57  207.38
   0   0   2 8433.36  208.08
   0   0  -2 9018.70  208.48
   0   0   2 8234.28  207.08
  -2   0  -2 9348.36  233.58
   2   0   2 9608.14  232.58
   2   0   2 9634.54  232.78
   2   0   2 9241.88  232.58
  -2   0  -2 9619.34  233.08
   2   0   2 9250.07  232.18
  -2   0  -2 9000.80  232.68
   2   0   2 9461.15  232.38
   2   0   2 9454.35  232.58
   2   0   2 9586.34  231.48
   2   0   2 9464.65  233.78
  -2   0  -2 9804.02  231.58
   4   0   2 1955.30   50.79
  -4   0  -2 1971.60   51.69
   4   0   2 1942.51   51.59
   4   0   2 1947.71   50.19
  -4   0  -2 1986.80   50.39
   4   0   2 2007.50   50.59
  -4   0  -2 2006.30   51.79
   4   0   2 1932.11   50.89
   6   0   2  620.94   18.60
   6   0   2  600.34   18.70
  -6   0  -2  622.14   20.10
  -6   0  -2  598.64   17.80
  -6   0  -2  621.84   19.80
   6   0   2  587.14   18.60
   6   0   2  609.24   17.80
   6   0   2  608.14   19.70
   8   0   2   36.70    5.30
  -8   0  -2   46.70    4.60
   8   0   2   26.70    3.80
  -8   0  -2   36.40    6.00
  -8   0  -2   31.60    5.00
   8   0   2   39.00    5.90
  -8   0  -2   40.90    5.90
   8   0   2   32.00    4.20
   8   0   2   32.40    5.40
  10   0   2  267.87   11.40
 -10   0  -2  279.87   11.50
  10   0   2  256.17   13.80
  10   0   2  265.77   12.70
 -10   0  -2  278.87   13.70
 -10   0  -2  266.87   12.40
 -10   0  -2  273.57   14.40
  10   0   2  270.37   12.60
  10   0   2  239.38   12.50
 -12   0  -2  461.15   18.30
 -12   0  -2  457.15   20.70
  12   0   2  446.46   17.30
 -12   0  -2  466.45   19.90
 -12   0  -2  467.25   17.00
  12   0   2  469.65   18.70
  12   0   2  459.35   18.90
  12   0   2  459.15   18.80
  14   0   2  116.59   11.70
  14   0   2  120.89   11.00
 -14   0  -2  118.19   12.70
 -14   0  -2  128.19   12.10
 -14   0  -2  128.59    9.30
  14   0   2  112.49    9.90
 -14   0  -2  130.19   10.50
  14   0   2  124.79   11.40
 -16   0  -2   42.60    6.80
 -16   0  -2   35.60    7.90
  16   0   2   50.09    7.90
  16   0   2   48.30    7.60
 -16   0  -2   34.60    7.80
  16   0   2   45.50    7.70
 -18   0  -2   -0.40    6.80
  18   0   2    2.40    6.30
 -18   0  -2    7.30    5.60
  18   0   2   -4.10    6.30
  18   0   2    3.10    6.50
 -18   0  -2    3.70    6.40
  20   0   2  663.23   30.00
  20   0   2  654.33   30.40
  20   0   2  642.44   30.50
 -20   0  -2  682.83   29.00
 -20   0  -2  656.93   33.30
 -20   0  -2  640.04   30.50
 -22   0  -2  431.26   24.10
  22   0   2  448.86   26.80
  22   0   2  460.05   26.20
 -22   0  -2  424.56   26.50
  22   0   2  410.76   26.70
 -22   0  -2  419.66   29.30
  24   0   2  354.46   26.20
 -24   0  -2  360.06   26.20
  24   0   2  326.67   26.00
  24   0   2  343.67   25.50
 -24   0  -2  371.16   29.40
 -24   0  -2  344.27   23.20
 -26   0  -2  205.58   23.90
  26   0   2  246.48   25.80
 -26   0  -2  229.78   27.20
 -26   0  -2  222.38   22.00
  26   0   2  237.88   26.10
  26   0   2  201.38   24.50
 -27  -1   2   21.20   10.10
  27  -1  -2   37.30   11.90
  27  -1  -2   18.80   12.30
 -27  -1   2   26.40    9.80
  27   1  -2   15.80   10.40
  27   1  -2   39.30   12.90
 -27   1   2   10.50   11.20
  27   1  -2   14.30   12.10
 -27   1   2   26.10   10.30
  25  -1  -2    8.00    8.50
  25  -1  -2   11.00    9.40
 -25  -1   2   -0.30    6.00
 -25  -1   2    3.30    8.20
  25  -1  -2  -18.80   10.20
 -25  -1   2    7.40    7.90
 -25   1   2    7.60    8.00
 -25   1   2   -0.40    6.60
  25   1  -2    8.10    8.50
  25   1  -2   -4.80    9.40
  25   1  -2    3.00    8.20
 -25   1   2   -6.60    9.00
  23  -1  -2  884.81   36.20
  23  -1  -2  875.51   34.50
 -23  -1   2  839.22   38.90
 -23  -1   2  824.82   35.40
 -23  -1   2  819.92   32.10
  23  -1  -2  779.52   38.20
  23   1  -2  840.62   34.20
 -23   1   2  834.82   35.60
  23   1  -2  767.82   36.40
 -23   1   2  884.61   40.60
 -23   1   2  786.82   32.00
  23   1  -2  796.42   33.70
 -21  -1   2  497.65   28.40
 -21  -1   2  499.25   25.60
  21  -1  -2  507.65   24.20
  21  -1  -2  477.65   28.20
 -21  -1   2  505.05   22.60
  21  -1  -2  497.95   26.00
  21   1  -2  491.65   26.70
  21   1  -2  500.05   23.80
  21   1  -2  473.35   25.50
 -21   1   2  542.25   30.10
 -21   1   2  492.35   22.60
 -21   1   2  513.75   25.60
  21   1  -2  531.35   24.70
 -19  -1   2  849.22   30.70
  19  -1  -2  924.21   32.20
  19  -1  -2  913.51   43.50
  19  -1  -2  895.01   33.90
  19  -1  -2  855.81   36.30
 -19  -1   2  879.81   37.20
 -19   1   2  868.91   30.80
  19   1  -2  851.11   34.80
 -19   1   2  923.31   34.50
 -19   1   2  965.10   32.60
  19   1  -2  888.71   32.50
  19   1  -2  853.71   31.40
 -19   1   2  929.61   38.80
  19   1  -2  793.82   33.50
  17  -1  -2  680.33   24.90
  17  -1  -2  673.23   26.90
  17  -1  -2  646.54   26.70
 -17  -1   2  690.13   30.40
 -17  -1   2  662.83   24.40
 -17  -1   2  669.03   27.40
  17  -1  -2  692.43   29.40
 -17   1   2  709.13   27.50
  17   1  -2  667.13   25.40
  17   1  -2  667.93   28.00
 -17   1   2  665.33   24.30
  17   1  -2  664.43   27.80
 -17   1   2  682.63   30.70
 -17   1   2  717.23   26.10
  17   1  -2  657.83   24.90
 -15  -1   2  110.29    9.40
  15  -1  -2  114.09   11.50
  15  -1  -2  134.39   13.50
  15  -1  -2  124.79   11.60
 -15  -1   2   98.19    8.60
 -15  -1   2  102.49   11.30
  15  -1  -2  120.49   10.20
 -15  -1   2   97.89   13.40
 -15   1   2  124.59   11.50
  15   1  -2  102.69   10.20
 -15   1   2  129.29    9.40
  15   1  -2   95.69   12.00
  15   1  -2   96.89   10.40
 -15   1   2  122.89   13.90
  15   1  -2   81.39   12.20
 -15   1   2  119.29   11.00
 -13  -1   2    3.30    4.50
  13  -1  -2    9.70    3.50
  13  -1  -2    9.40    4.10
 -13  -1   2    5.30    2.80
  13  -1  -2   11.10    4.40
  13  -1  -2   12.00    5.10
 -13  -1   2    5.30    3.90
 -13  -1   2    5.40    3.00
 -13   1   2    4.60    3.40
  13   1  -2    4.90    3.60
 -13   1   2    8.90    3.70
 -13   1   2    9.80    3.00
 -13   1   2    5.90    4.40
  13   1  -2   -0.20    4.10
  13   1  -2    5.80    4.30
  13   1  -2    4.50    3.30
  11  -1  -2   83.59    9.60
  11  -1  -2   76.69    6.20
 -11  -1   2   64.89    5.70
 -11  -1   2   65.39    7.50
  11  -1  -2   79.59    7.60
  11  -1  -2   89.09    8.40
  11   1  -2   56.39    5.90
  11   1  -2   65.09    7.90
 -11   1   2   83.69    7.60
  11   1  -2   66.39    6.20
 -11   1   2   79.79    7.30
 -11   1   2   74.39    5.90
  11   1  -2   67.89    7.70
 -11   1   2   77.19    9.40
  -9  -1   2   50.39    4.10
   9  -1  -2   55.69    5.90
  -9  -1   2   53.29    5.60
   9  -1  -2   63.99    6.30
   9  -1  -2   54.69    4.60
  -9  -1   2   49.70    6.30
  -9  -1   2   47.70    4.20
   9  -1  -2   60.99    7.40
  -9   1   2   66.69    6.10
   9   1  -2   42.40    4.40
   9   1  -2   44.80    5.90
   9   1  -2   43.60    4.60
  -9   1   2   62.19    7.50
  -9   1   2   54.29    5.50
   9   1  -2   56.09    6.40
  -7  -1   2    1.60    1.20
  -7  -1   2    0.90    1.70
   7  -1  -2    8.40    2.90
  -7  -1   2    0.70    1.90
   7  -1  -2    5.20    2.40
  -7  -1   2    0.70    1.30
   7  -1  -2    4.20    2.10
   7   1  -2    1.60    2.20
   7   1  -2    1.70    1.40
   7   1  -2    2.10    1.50
  -7   1   2    3.00    1.10
  -7   1   2    3.80    1.90
   7   1  -2    1.90    2.30
  -7   1   2    4.10    1.70
   7   1  -2    4.10    1.30
  -7   1   2    3.50    2.30
  -5  -1   2   24.60    3.60
  -5  -1   2   32.50    3.60
   5  -1  -2   33.80    2.90
   5  -1  -2   23.00    3.30
   5  -1  -2   31.60    4.60
  -5  -1   2   30.40    2.60
  -5  -1   2   21.30    2.70
   5   1  -2   28.20    4.80
  -5   1   2   34.40    4.80
  -5   1   2   29.50    2.80
  -5   1   2   34.90    3.40
   5   1  -2   26.20    4.30
  -5   1   2   33.30    4.30
   5   1  -2   25.50    2.60
   5   1  -2   27.30    2.90
   3  -1  -2 2300.87   57.69
   3  -1  -2 2353.56   57.79
   3  -1  -2 2236.08   56.99
  -3  -1   2 2323.77   56.19
  -3  -1   2 2321.37   57.29
  -3  -1   2 2320.07   56.89
  -3  -1   2 2254.87   56.69
  -3   1   2 2119.59   57.59
  -3   1   2 2180.68   56.79
  -3   1   2 2137.69   57.59
   3   1  -2 2271.97   56.69
   3   1  -2 2297.87   57.79
   3   1  -2 2208.38   56.59
  -3   1   2 2154.08   57.39
   1  -1  -2 1252.77   32.50
   1  -1  -2 1290.97   33.00
   1  -1  -2 1239.68   31.90
  -1  -1   2 1302.27   32.80
  -1  -1   2 1277.57   33.10
  -1  -1   2 1314.37   32.90
  -1  -1   2 1276.37   33.10
  -1   1   2 1240.58   32.50
  -1   1   2 1268.97   33.30
   1   1  -2 1332.57   33.10
  -1   1   2 1279.77   33.10
  -1   1   2 1278.67   32.70
   1   1  -2 1272.27   33.10
  -1   1   2 1292.87   33.10
   1   1  -2 1284.07   32.80
   1  -1   2 3419.46   83.69
   1  -1   2 3329.47   82.79
   1  -1   2 3361.96   83.49
  -1  -1  -2 3379.76   82.99
  -1  -1  -2 3382.16   83.09
  -1  -1  -2 3254.77   82.59
   1  -1   2 3462.45   83.49
  -1  -1  -2 3349.26   82.89
   1  -1   2 3341.27   83.49
   1   1   2 3303.17   82.59
  -1   1  -2 3296.77   83.69
   1   1   2 3408.56   82.99
   1   1   2 3314.67   82.89
   1   1   2 3288.47   83.49
   1   1   2 3277.07   82.89
  -1   1  -2 3211.68   83.49
   1   1   2 3364.56   82.69
   1   1   2 3326.27   82.79
   1   1   2 3339.17   83.09
  -1   1  -2 3331.97   82.79
   3  -1   2 9562.54  235.88
  -3  -1  -2 9803.02  236.08
   3  -1   2 9392.76  235.68
   3  -1   2 9639.64  235.48
   3  -1   2 9559.04  237.18
  -3  -1  -2 9456.35  235.38
   3  -1   2 9999.00  234.78
  -3  -1  -2 9729.93  235.38
  -3   1  -2 9365.16  234.08
   3   1   2 9592.74  235.28
   3   1   2 9477.45  236.08
   3   1   2 9321.57  235.48
   3   1   2 9664.23  235.98
  -3   1  -2 9541.65  236.28
   3   1   2 9538.45  234.58
  -3   1  -2 9595.74  236.38
   3   1   2 9317.67  235.08
   3   1   2 9526.95  235.18
  -3   1  -2 9642.63  235.98
   5  -1   2 3415.06   83.79
  -5  -1  -2 3340.47   84.99
   5  -1   2 3253.17   84.29
   5  -1   2 3310.57   84.59
  -5  -1  -2 3333.77   85.19
  -5  -1  -2 3323.77   84.19
   5  -1   2 3329.07   84.99
  -5   1  -2 3365.86   85.69
   5   1   2 3299.97   84.09
   5   1   2 3241.38   83.99
   5   1   2 3328.17   83.99
  -5   1  -2 3338.87   85.09
   5   1   2 3251.57   84.99
   5   1   2 3242.88   84.09
  -5   1  -2 3291.07   84.29
   7  -1   2 1039.20   31.80
   7  -1   2 1098.99   31.50
  -7  -1  -2 1083.49   32.40
   7  -1   2 1112.09   31.00
  -7  -1  -2 1096.69   31.10
   7  -1   2 1089.49   31.50
  -7  -1  -2 1108.59   32.50
   7   1   2 1072.99   30.90
   7   1   2 1112.39   31.10
  -7   1  -2 1124.09   33.20
   7   1   2 1120.39   31.20
  -7   1  -2 1090.69   32.10
   7   1   2 1085.39   31.00
  -7   1  -2 1039.20   30.80
  -9  -1  -2   78.49    8.10
   9  -1   2   74.89    7.70
   9  -1   2   87.19    7.40
  -9  -1  -2   83.69    8.40
   9  -1   2   76.69    7.60
  -9  -1  -2   86.39    6.90
   9  -1   2   73.69    7.90
  -9   1  -2   77.99    6.80
   9   1   2   53.89    7.40
  -9   1  -2   76.19    8.30
  -9   1  -2   82.69    7.90
   9   1   2   66.09    6.70
   9   1   2   92.69    7.40
   9   1   2   58.19    7.30
  11  -1   2  176.78   11.20
 -11  -1  -2  161.78   10.20
  11  -1   2  194.58   11.20
  11  -1   2  171.88   10.90
  11  -1   2  181.58   12.00
 -11  -1  -2  169.88   12.10
 -11  -1  -2  175.28   11.80
  11   1   2  136.69   10.40
 -11   1  -2  201.08   10.50
  11   1   2  156.18   10.00
  11   1   2  161.48   11.00
 -11   1  -2  184.28   12.50
 -11   1  -2  188.78   11.70
  11   1   2  147.99   10.50
  13  -1   2  118.49   10.90
 -13  -1  -2  100.89    9.50
 -13  -1  -2  106.19   11.30
  13  -1   2  125.99   11.90
  13  -1   2  124.69   10.80
  13  -1   2  112.09   11.00
 -13  -1  -2   93.79   11.40
  13  -1   2  127.89    8.60
 -13   1  -2  115.99   10.10
  13   1   2   92.99    9.40
 -13   1  -2  116.39   11.00
  13   1   2   85.19   10.50
  13   1   2   90.79    9.90
 -13   1  -2  139.39   12.50
  13   1   2   91.69   10.00
  15  -1   2   12.50    5.90
 -15  -1  -2   18.60    5.80
  15  -1   2   23.50    6.10
 -15  -1  -2   16.80    5.10
  15  -1   2   27.00    6.30
 -15  -1  -2   12.70    5.70
 -15   1  -2   17.10    6.00
  15   1   2   12.20    5.60
  15   1   2   18.40    5.90
 -15   1  -2   19.70    5.90
 -15   1  -2   23.60    5.50
  15   1   2   18.70    5.30
  15   1   2   13.30    5.40
 -15   1  -2   14.20    4.50
  17  -1   2   -1.00    5.80
 -17  -1  -2   -8.30    6.00
  17  -1   2  -10.00    5.70
 -17  -1  -2   -7.30    5.50
 -17  -1  -2   -6.10    4.80
  17  -1   2   -1.90    5.60
  17   1   2   -5.30    5.70
 -17   1  -2    1.90    5.00
  17   1   2    1.60    5.80
  17   1   2    3.20    5.00
  17   1   2   -9.90    5.60
  19  -1   2  156.78   16.80
 -19  -1  -2  134.39   14.80
  19  -1   2  155.88   16.70
 -19  -1  -2  149.39   16.80
 -19  -1  -2  150.48   18.00
  19  -1   2  145.69   16.80
 -19   1  -2  133.29   18.20
 -19   1  -2  152.88   15.00
 -19   1  -2  127.79   16.30
  19   1   2  122.09   16.00
  19   1   2  133.39   16.50
  19   1   2  128.69   16.00
  21  -1   2  338.77   23.60
  21  -1   2  347.67   23.10
 -21  -1  -2  340.67   25.40
  21  -1   2  347.47   24.00
 -21  -1  -2  369.96   22.00
 -21  -1  -2  333.97   23.50
  21   1   2  333.77   22.90
  21   1   2  351.76   23.30
 -21   1  -2  334.67   23.20
 -21   1  -2  334.77   26.10
 -21   1  -2  330.17   20.80
  21   1   2  317.17   22.70
 -23  -1  -2  376.36   28.00
 -23  -1  -2  359.36   25.20
  23  -1   2  376.96   26.90
  23  -1   2  370.06   25.90
  23  -1   2  371.16   26.80
 -23   1  -2  385.26   23.80
  23   1   2  349.47   25.00
 -23   1  -2  380.66   28.90
  23   1   2  329.37   24.90
 -23   1  -2  351.36   24.80
  23   1   2  353.26   25.70
  25  -1   2  152.28   22.50
 -25  -1  -2  140.29   18.70
 -25  -1  -2  170.68   24.60
  25  -1   2  148.69   22.20
  25  -1   2  149.49   22.00
 -25  -1  -2  163.88   21.40
 -25   1  -2  157.58   19.40
 -25   1  -2  152.18   23.70
  25   1   2  144.89   21.90
 -25   1  -2  163.88   21.30
  25   1   2  143.89   22.30
  28  -2  -2   27.20   12.30
 -28  -2   2   16.20    9.70
 -28  -2   2    6.30   10.00
  28  -2  -2   10.80   12.40
 -28   2   2   -6.80   11.70
  28   2  -2    9.90   19.00
 -28   2   2    6.00    9.60
  28   2  -2    4.30    9.90
  26  -2  -2   -6.00   11.10
 -26  -2   2   -3.10    6.30
 -26  -2   2   -4.40    8.20
 -26  -2   2    2.70    8.20
  26  -2  -2    4.20    9.90
  26   2  -2   -3.50    8.00
 -26   2   2   -9.00    9.40
 -26   2   2    6.90    8.70
  26   2  -2   -5.00    7.90
  26   2  -2   -0.40   10.20
  24  -2  -2   -9.60   10.20
 -24  -2   2    5.40    6.30
 -24  -2   2    8.10    7.70
 -24  -2   2   13.70    7.70
  24  -2  -2    4.70    9.50
  24  -2  -2   -6.60    7.90
 -24   2   2    2.20    9.30
  24   2  -2   14.70    8.40
  24   2  -2    0.90    9.70
 -24   2   2    0.90    7.60
 -24   2   2    0.10    6.30
  24   2  -2   -5.10    7.60
 -22  -2   2  125.89   17.40
  22  -2  -2  108.89   17.50
 -22  -2   2  122.19   15.80
  22  -2  -2   90.99   13.70
 -22  -2   2   92.59   12.90
  22  -2  -2   80.39   11.20
  22   2  -2  107.49   15.50
 -22   2   2  120.39   15.80
 -22   2   2  130.09   19.80
 -22   2   2   89.59   13.40
  22   2  -2  114.49   15.10
  22   2  -2   68.99   11.60
  20  -2  -2   19.30    8.80
  20  -2  -2   20.80    9.90
 -20  -2   2   21.20    5.90
 -20  -2   2   22.30    7.60
  20  -2  -2   25.50    7.50
 -20  -2   2   38.30    8.30
 -20   2   2   17.40    5.90
  20   2  -2   21.80    7.50
  20   2  -2   23.60    8.20
  20   2  -2   13.80    6.80
 -20   2   2   41.60    9.30
  20   2  -2   30.00    7.50
 -20   2   2   31.10    7.70
  18  -2  -2   24.30    8.40
 -18  -2   2   26.00    6.80
 -18  -2   2   29.20    5.50
  18  -2  -2   28.70    6.80
  18  -2  -2   18.60    8.90
 -18  -2   2   21.70    7.20
  18   2  -2   28.60    6.50
  18   2  -2   16.20    6.30
 -18   2   2   35.10    6.70
 -18   2   2   28.00    5.90
  18   2  -2   27.90    7.50
 -18   2   2   31.30    6.90
 -18   2   2   22.10    7.50
  18   2  -2   21.30    7.20
  16  -2  -2  148.39   16.40
 -16  -2   2  121.69   10.10
  16  -2  -2  136.59   11.40
 -16  -2   2  115.29   13.90
  16  -2  -2  113.49   13.10
 -16  -2   2  116.39   12.10
  16  -2  -2  126.49   13.50
  16   2  -2  105.59   13.00
  16   2  -2  103.69   12.80
 -16   2   2  117.09   14.50
 -16   2   2  121.89   10.30
 -16   2   2  118.39   12.60
  16   2  -2  106.19   11.10
 -16   2   2  116.39   12.10
  16   2  -2  114.99   10.90
  14  -2  -2  121.49   14.20
  14  -2  -2  108.79   11.60
  14  -2  -2  110.69   11.50
 -14  -2   2  108.49    8.70
  14  -2  -2  108.59    9.60
 -14  -2   2   86.69   11.60
 -14  -2   2   91.79   10.40
  14   2  -2   89.29   11.20
  14   2  -2   96.59    9.50
 -14   2   2   92.79   13.20
  14   2  -2  112.09    9.20
 -14   2   2   81.49   11.20
  14   2  -2   90.39   11.30
 -14   2   2  102.89   10.40
 -12  -2   2   61.99    6.70
  12  -2  -2   68.69    7.50
 -12  -2   2   54.19    9.40
 -12  -2   2   58.19    8.50
  12  -2  -2   97.29   11.60
  12  -2  -2   78.49    9.30
  12   2  -2   67.79    7.00
  12   2  -2   56.19    8.70
 -12   2   2   66.99    8.00
 -12   2   2   56.49   10.50
  12   2  -2   64.59    8.90
  12   2  -2   77.59    7.40
 -12   2   2   47.00    8.80
  10  -2  -2  438.16   15.70
  10  -2  -2  453.85   17.90
 -10  -2   2  493.35   18.80
 -10  -2   2  457.45   15.80
  10  -2  -2  476.35   17.00
 -10  -2   2  495.65   18.10
  10  -2  -2  487.95   19.60
 -10   2   2  439.46   20.10
 -10   2   2  448.56   18.60
  10   2  -2  492.95   18.50
 -10   2   2  458.65   17.00
  10   2  -2  448.76   15.70
  10   2  -2  500.65   15.90
  10   2  -2  465.35   14.80
 -10   2   2  455.45   14.20
  10   2  -2  487.35   17.30
   8  -2  -2  979.30   28.10
   8  -2  -2  886.51   26.80
   8  -2  -2  929.01   29.00
  -8  -2   2 1014.00   29.00
  -8  -2   2  971.70   27.00
  -8  -2   2 1038.30   29.40
   8  -2  -2 1007.20   30.40
  -8   2   2  920.61   30.10
   8   2  -2 1020.20   29.80
   8   2  -2  989.40   26.70
  -8   2   2  890.81   30.90
  -8   2   2  963.20   28.00
   8   2  -2  979.40   28.10
  -8   2   2  922.91   26.20
   8   2  -2  971.40   26.80
   6  -2  -2  543.55   16.90
   6  -2  -2  503.95   17.50
  -6  -2   2  575.44   17.10
   6  -2  -2  479.45   15.50
  -6  -2   2  552.54   15.20
   6  -2  -2  535.65   18.10
  -6  -2   2  550.04   15.80
  -6  -2   2  562.44   17.10
   6   2  -2  575.24   18.00
   6   2  -2  550.04   15.30
  -6   2   2  504.75   15.70
  -6   2   2  510.35   16.50
   6   2  -2  557.34   16.40
  -6   2   2  473.25   18.60
   6   2  -2  548.95   15.90
  -6   2   2  515.05   16.00
  -6   2   2  492.85   18.50
   4  -2  -2 8820.62  211.78
  -4  -2   2 8748.42  210.88
   4  -2  -2 8840.22  211.28
   4  -2  -2 8480.25  211.38
  -4  -2   2 8822.82  210.08
  -4  -2   2 8906.21  210.88
   4  -2  -2 8205.98  209.58
  -4  -2   2 8456.45  209.78
  -4  -2   2 8442.66  209.08
   4   2  -2 8597.44  211.68
  -4   2   2 7611.14  210.48
   4   2  -2 8674.73  210.38
   4   2  -2 8675.33  209.08
  -4   2   2 8417.66  210.78
   4   2  -2 8488.45  209.88
   4   2  -2 8850.01  210.08
  -4   2   2 8043.50  212.08
  -4   2   2 8445.96  212.88
   2  -2  -2   14.20    2.70
  -2  -2   2   18.40    2.50
   2  -2  -2   15.50    2.60
  -2  -2   2   18.30    2.60
  -2  -2   2   18.20    2.60
   2  -2  -2   15.10    2.10
  -2  -2   2   15.10    2.40
  -2   2   2   18.40    2.60
   2   2  -2   18.10    2.80
  -2   2   2   16.70    3.50
   2   2  -2   19.80    2.50
  -2   2   2   14.00    2.60
  -2   2   2   19.00    2.70
   2   2  -2   18.40    3.30
  -2   2   2   16.50    2.90
   0  -2   2   29.00    3.60
   0  -2   2   27.90    2.80
   0  -2  -2   29.80    2.60
   0  -2  -2   29.20    2.90
   0  -2   2   31.90    3.40
   0  -2  -2   26.80    2.80
   0  -2   2   28.30    3.00
   0   2  -2   30.00    3.20
   0   2  -2   32.20    3.20
   0   2   2   33.00    2.90
   0   2   2   33.10    2.90
   0   2   2   38.80    3.20
   0   2   2   37.70    3.50
   0   2  -2   29.60    3.00
   0   2  -2   32.30    3.00
   2  -2   2  604.34   17.50
   2  -2   2  558.14   17.20
  -2  -2  -2  571.34   16.80
  -2  -2  -2  605.94   16.80
   2  -2   2  555.04   17.70
   2  -2   2  563.74   17.60
  -2  -2  -2  596.74   16.90
   2   2   2  598.44   16.70
   2   2   2  589.84   16.80
  -2   2  -2  540.25   16.40
   2   2   2  598.54   17.30
  -2   2  -2  559.14   17.50
   2   2   2  604.34   16.90
   2   2   2  621.34   17.80
  -2   2  -2  570.04   17.70
   4  -2   2  130.19    7.40
   4   2   2  163.08    6.90
  -4   2  -2  138.39    7.30
   6  -2   2  385.86   14.60
   6  -2   2  408.76   13.90
  -6  -2  -2  418.66   14.80
   6  -2   2  407.66   14.90
   6  -2   2  411.76   14.80
  -6  -2  -2  410.66   14.90
  -6  -2  -2  420.46   14.10
  -6   2  -2  402.76   14.70
   6   2   2  404.46   14.00
   6   2   2  407.76   12.90
  -6   2  -2  416.46   15.80
   6   2   2  410.96   14.00
  -6   2  -2  412.66   14.80
   6   2   2  412.86   14.10
   6   2   2  401.76   14.50
   8  -2   2  106.69    8.40
   8  -2   2  110.59    8.60
   8  -2   2  101.09    8.00
  -8  -2  -2  125.39    8.90
   8  -2   2  121.59    8.70
  -8  -2  -2  115.29    8.70
  -8  -2  -2  126.49    7.70
  -8   2  -2  105.29    9.10
   8   2   2  126.59    7.90
   8   2   2  123.39    7.90
   8   2   2  125.09    8.30
  -8   2  -2  120.59    8.60
  -8   2  -2  106.19    8.00
   8   2   2  115.29    8.10
 -10  -2  -2 2022.90   55.29
  10  -2   2 1952.60   56.29
 -10  -2  -2 2018.60   56.99
  10  -2   2 1912.51   55.79
  10  -2   2 1857.81   56.29
 -10  -2  -2 2135.69   57.79
  10  -2   2 2068.79   55.89
 -10   2  -2 1979.90   58.39
 -10   2  -2 1993.60   56.59
  10   2   2 2045.90   55.29
  10   2   2 2040.40   55.39
  10   2   2 2040.30   55.79
 -10   2  -2 1901.21   55.69
  10   2   2 2129.99   56.49
  12   2   2  330.47   16.00
  14  -2   2  417.26   20.40
  14  -2   2  360.56   19.80
  14  -2   2  417.56   20.10
 -14  -2  -2  457.55   21.70
  14  -2   2  408.36   19.60
 -14  -2  -2  422.16   20.30
 -14  -2  -2  430.66   19.00
  14   2   2  453.95   19.90
 -14   2  -2  382.86   21.50
  14   2   2  429.26   19.60
  14   2   2  435.26   19.10
 -14   2  -2  393.96   18.70
  14   2   2  425.96   19.40
  16  -2   2   90.89   13.00
  16  -2   2  102.19   13.60
 -16  -2  -2  118.69   13.60
 -16  -2  -2   96.89   11.90
 -16  -2  -2  118.19   14.80
  16   2   2  100.89   13.30
 -16   2  -2   92.69   11.80
  16   2   2  106.19   13.20
  16   2   2   96.79   12.40
  16   2   2  109.39   12.60
 -18  -2  -2    2.30    6.60
  18  -2   2    4.70    6.70
  18  -2   2    5.30    7.10
 -18  -2  -2    5.60    6.60
  18  -2   2  -12.80    6.60
 -18  -2  -2   -4.80    5.20
  18   2   2   -3.70    6.40
  18   2   2   -2.90    5.40
 -18   2  -2    0.20    7.80
 -18   2  -2    1.80    5.40
  18   2   2   -4.70    6.40
 -18   2  -2   -7.80    6.20
  20  -2   2   13.70    9.00
 -20  -2  -2   15.80    7.40
 -20  -2  -2   14.90    8.30
  20  -2   2    8.70    8.70
  20  -2   2   23.80    9.10
 -20  -2  -2   17.10    8.40
  20   2   2    9.10    8.20
  20   2   2    8.40    8.40
 -20   2  -2   19.50    8.80
 -20   2  -2   23.90    8.90
 -20   2  -2   15.80    7.50
  20   2   2   17.40    8.30
 -22  -2  -2   54.79    9.80
  22  -2   2   68.59   12.80
  22  -2   2   71.09   12.30
 -22  -2  -2   46.30   10.80
 -22  -2  -2   54.39   10.60
  22  -2   2   51.99   11.50
 -22   2  -2   63.89   12.70
 -22   2  -2   67.29   10.40
  22   2   2   51.79   11.20
  22   2   2   40.80   11.00
  22   2   2   47.80   11.30
 -22   2  -2   65.69   11.70
  24  -2   2    6.60    9.70
 -24  -2  -2   13.90    9.20
 -24  -2  -2   13.40    9.70
  24  -2   2   30.70   11.80
  24  -2   2    3.40   10.80
 -24  -2  -2   12.90    8.20
 -24   2  -2   11.20    8.30
 -24   2  -2   26.00   10.80
 -24   2  -2   20.90   10.00
  24   2   2    3.70    9.60
  24   2   2    7.90    9.90
  24   2   2    1.60    9.90
  26  -2   2    5.90   10.90
  26  -2   2   -5.90   11.40
  26  -2   2    1.40   15.00
 -26  -2  -2    6.20   10.30
 -26  -2  -2   -0.10    8.20
  26   2   2  -14.20   10.80
 -26   2  -2    6.90   11.90
 -26   2  -2    5.10    9.00
  26   2   2    1.70   11.30
 -26   2  -2   14.20   10.70
  26   2   2   -3.30   10.20
 -27  -3   2   -0.80    8.70
  27  -3  -2   -1.20   11.50
  27  -3  -2  -14.00   11.30
 -27  -3   2    6.90    9.30
 -27  -3   2    5.80    7.60
  27   3  -2    9.30   10.50
  27   3  -2   -3.20    9.70
 -27   3   2   12.20   10.50
 -27   3   2   -0.20    8.90
 -25  -3   2   -4.40    6.50
  25  -3  -2  -16.30    9.50
 -25  -3   2   -1.10    7.70
 -25  -3   2   -3.90    7.80
  25  -3  -2   -6.80   10.40
  25   3  -2  -12.40    8.00
 -25   3   2   -4.90    7.60
  25   3  -2   -6.10    8.90
 -25   3   2   -5.20    9.00
 -23  -3   2    3.40    6.20
  23  -3  -2  -15.70    7.50
  23  -3  -2   -7.60    9.20
 -23  -3   2    4.40    7.30
 -23  -3   2    7.60    7.50
  23  -3  -2    4.70   10.20
 -23   3   2    0.80    9.10
  23   3  -2   -2.30    7.50
 -23   3   2    0.40    6.00
  23   3  -2  -10.90    8.10
  23   3  -2    0.60    7.10
 -23   3   2    3.60    7.70
  23   3  -2   -6.50    7.50
  21  -3  -2  114.79   18.10
 -21  -3   2  120.99   15.60
  21  -3  -2  144.69   20.60
 -21  -3   2  128.69   17.20
  21  -3  -2  128.49   15.00
 -21  -3   2  135.19   13.30
 -21   3   2  142.39   15.40
  21   3  -2  125.79   16.50
 -21   3   2  128.99   15.00
  21   3  -2  146.39   14.70
 -21   3   2  113.69   18.70
  21   3  -2  126.69   14.70
 -21   3   2  128.59   13.30
  21   3  -2  119.69   16.80
  19  -3  -2  175.28   18.90
 -19  -3   2  217.28   18.10
  19  -3  -2  188.88   15.20
 -19  -3   2  215.58   16.60
  19  -3  -2  208.68   20.90
 -19  -3   2  208.88   14.10
 -19   3   2  214.88   15.90
 -19   3   2  194.28   16.40
 -19   3   2  191.78   19.40
 -19   3   2  204.58   14.20
  19   3  -2  190.38   16.60
  19   3  -2  211.68   15.30
  19   3  -2  225.08   17.60
  19   3  -2  200.08   15.10
 -17  -3   2   18.10    4.60
  17  -3  -2    1.10    7.00
  17  -3  -2    6.80    5.40
 -17  -3   2   10.30    5.30
  17  -3  -2   12.70    8.70
 -17  -3   2   11.70    5.80
  17   3  -2    0.70    5.30
 -17   3   2    5.80    6.10
  17   3  -2    8.30    5.80
 -17   3   2    2.20    5.10
  17   3  -2   13.40    5.70
 -17   3   2    9.20    5.20
  17   3  -2    8.10    5.20
 -15  -3   2    7.80    4.50
  15  -3  -2    1.70    4.50
 -15  -3   2    5.20    4.30
 -15  -3   2    7.00    3.50
  15  -3  -2    8.50    7.60
  15  -3  -2    7.00    5.70
  15  -3  -2    4.40    5.70
 -15   3   2    2.10    5.40
 -15   3   2    1.50    4.50
  15   3  -2    1.70    4.70
  15   3  -2    7.50    4.20
  15   3  -2    1.90    4.60
 -15   3   2   -1.20    4.80
 -13  -3   2  615.44   20.90
  13  -3  -2  566.94   21.30
 -13  -3   2  610.24   23.20
  13  -3  -2  598.24   24.20
  13  -3  -2  584.64   22.20
  13  -3  -2  620.14   26.10
 -13  -3   2  641.64   23.90
  13   3  -2  605.14   20.80
  13   3  -2  631.84   24.20
 -13   3   2  582.84   22.30
 -13   3   2  553.44   25.80
  13   3  -2  587.14   19.20
 -13   3   2  591.94   24.60
  13   3  -2  610.74   22.50
  11  -3  -2  715.93   26.20
 -11  -3   2  665.63   21.40
 -11  -3   2  687.43   23.70
  11  -3  -2  638.24   21.50
  11  -3  -2  647.44   21.90
 -11  -3   2  670.03   23.60
  11  -3  -2  652.83   24.30
 -11   3   2  624.34   22.30
 -11   3   2  623.34   26.40
  11   3  -2  656.63   20.40
  11   3  -2  661.73   22.50
 -11   3   2  605.24   24.80
  11   3  -2  654.93   21.10
  11   3  -2  685.83   24.30
 -11   3   2  617.34   19.60
   9  -3  -2 4129.99  111.19
  -9  -3   2 4473.35  111.49
   9  -3  -2 4343.17  114.09
   9  -3  -2 4174.28  111.49
  -9  -3   2 4554.64  113.49
   9  -3  -2 4444.76  111.99
  -9  -3   2 4554.34  113.09
   9  -3  -2 4458.55  114.69
  -9   3   2 4281.27  111.79
  -9   3   2 4237.18  110.49
  -9   3   2 4223.28  115.29
  -9   3   2 4291.67  116.19
   9   3  -2 4602.04  114.49
   9   3  -2 4515.85  111.19
   9   3  -2 4425.36  110.79
   9   3  -2 4481.95  112.09
  -7  -3   2 3840.22   95.09
   7  -3  -2 3738.73   96.69
  -7  -3   2 3875.81   94.59
   7  -3  -2 3580.74   96.49
   7  -3  -2 3753.12   94.99
  -7  -3   2 3917.31   95.89
  -7  -3   2 3719.53   93.49
   7  -3  -2 3531.65   94.19
   7  -3  -2 3628.54   93.99
   7   3  -2 3844.42   96.79
   7   3  -2 3816.02   94.49
  -7   3   2 3707.73   94.79
  -7   3   2 3473.85   97.89
  -7   3   2 3702.93   94.19
  -7   3   2 3586.74   97.99
  -7   3   2 3657.93   94.29
   7   3  -2 3787.42   94.49
   7   3  -2 3732.33   93.49
   5  -3  -2 6090.19  151.38
  -5  -3   2 6270.57  150.78
   5  -3  -2 5788.92  150.38
   5  -3  -2 6278.27  152.58
  -5  -3   2 6304.57  150.98
  -5  -3   2 5878.51  149.69
  -5  -3   2 6314.97  151.58
   5  -3  -2 6039.30  152.58
  -5  -3   2 6121.89  149.69
   5   3  -2 6154.18  152.38
  -5   3   2 5848.51  154.08
  -5   3   2 5694.53  150.88
  -5   3   2 5906.31  150.98
   5   3  -2 5967.60  149.79
   5   3  -2 6178.88  150.18
   5   3  -2 6161.78  151.08
   5   3  -2 6279.37  149.69
  -5   3   2 5656.23  152.98
  -3  -3   2   13.50    2.40
  -3  -3   2   10.30    1.90
   3  -3  -2   10.50    2.00
   3  -3  -2    5.50    2.10
   3  -3  -2    7.80    2.10
  -3  -3   2   10.30    2.00
  -3  -3   2   12.80    2.70
  -3  -3   2    8.50    1.70
  -3   3   2    6.90    1.90
  -3   3   2    7.20    2.50
  -3   3   2    9.00    2.20
  -3   3   2    6.00    1.80
  -1  -3   2 3840.62   96.49
   1  -3  -2 3718.23   95.89
  -1  -3   2 3947.71   96.59
   1  -3  -2 3798.52   96.59
  -1  -3   2 3877.91   96.99
   1  -3  -2 3916.61   96.79
  -1  -3   2 3968.30   96.19
   1   3  -2 3927.91   96.49
  -1   3   2 3725.63   97.09
  -1   3   2 3677.83   97.29
   1   3  -2 3938.81   97.19
  -1   3   2 3802.22   96.29
   1   3  -2 3849.01   96.79
  -1   3   2 3802.82   98.39
  -1  -3  -2 1517.35   38.80
   1  -3   2 1474.95   40.10
   1  -3   2 1431.06   39.00
  -1  -3  -2 1479.65   39.10
   1  -3   2 1447.16   39.40
  -1  -3  -2 1489.95   39.10
  -1  -3  -2 1488.55   38.00
   1  -3   2 1498.95   39.80
  -1   3  -2 1443.36   37.80
   1   3   2 1499.05   39.00
   1   3   2 1494.75   38.90
  -1   3  -2 1458.15   40.10
  -1   3  -2 1405.36   39.00
  -1   3  -2 1434.36   39.40
   1   3   2 1504.75   39.30
   1   3   2 1485.15   39.90
   1   3   2 1517.55   40.10
   3  -3   2 1985.30   50.89
  -3  -3  -2 1923.01   49.40
   3  -3   2 1863.81   50.79
   3  -3   2 1863.01   49.80
   3  -3   2 1922.71   50.79
  -3  -3  -2 1917.41   49.60
  -3  -3  -2 1923.11   49.40
   3   3   2 1900.81   49.50
   3   3   2 1867.31   49.40
  -3   3  -2 1902.11   50.59
   3   3   2 1878.11   50.69
  -3   3  -2 1829.72   50.69
   3   3   2 1886.71   50.09
  -3   3  -2 1802.12   48.80
   5  -3   2  112.49    7.60
  -5  -3  -2  106.39    5.80
   5  -3   2   96.09    6.40
  -5  -3  -2  112.69    6.30
  -5  -3  -2  111.19    6.70
   5  -3   2  105.79    6.60
   5  -3   2  110.59    7.80
   5  -3   2  102.99    7.40
  -5  -3  -2  104.79    6.20
  -5   3  -2  112.99    7.40
   5   3   2  109.69    6.40
   5   3   2  101.19    6.40
   5   3   2  114.09    7.10
  -5   3  -2  108.09    7.30
   5   3   2  106.89    6.40
  -5   3  -2  103.09    5.20
   5   3   2  104.39    6.20
   7  -3   2   68.69    6.70
  -7  -3  -2   88.49    7.30
  -7  -3  -2   83.99    6.70
  -7  -3  -2   88.59    6.40
   7  -3   2   76.19    7.40
   7  -3   2   61.19    8.10
  -7  -3  -2   88.19    6.30
  -7   3  -2   78.39    6.80
  -7   3  -2   69.49    4.60
  -7   3  -2   71.59    7.70
   7   3   2   78.79    7.10
   7   3   2   82.79    6.20
  -7   3  -2   70.39    7.20
   7   3   2   76.89    6.70
   7   3   2   91.89    6.60
   7   3   2   83.69    6.80
   9  -3   2 1908.61   55.69
  -9  -3  -2 2015.40   55.69
   9  -3   2 1910.31   56.29
   9  -3   2 1908.31   55.49
  -9  -3  -2 1982.20   56.09
   9  -3   2 1972.50   55.09
  -9  -3  -2 2033.70   54.69
  -9   3  -2 1910.91   55.99
   9   3   2 2036.00   55.09
  -9   3  -2 1923.51   57.49
   9   3   2 2068.79   54.79
   9   3   2 2111.39   53.09
  -9   3  -2 1971.50   55.69
   9   3   2 2094.19   56.69
   9   3   2 2069.89   54.89
 -11  -3  -2 2023.10   56.79
  11  -3   2 1877.81   55.79
  11  -3   2 1923.51   55.99
  11  -3   2 1938.01   55.49
  11  -3   2 1975.80   56.99
 -11  -3  -2 1949.20   56.59
 -11  -3  -2 1955.90   54.79
 -11   3  -2 1921.81   58.29
 -11   3  -2 1922.71   56.29
  11   3   2 2012.50   55.49
  11   3   2 1996.00   56.69
  11   3   2 1949.20   54.79
  11   3   2 2002.60   54.99
 -11   3  -2 1926.11   55.89
  13  -3   2 1456.95   45.40
  13  -3   2 1460.45   45.20
 -13  -3  -2 1460.15   44.00
 -13  -3  -2 1557.04   46.90
 -13  -3  -2 1465.15   46.00
  13  -3   2 1363.16   45.40
  13  -3   2 1428.16   46.30
  13   3   2 1550.14   46.50
 -13   3  -2 1377.56   47.60
  13   3   2 1526.45   45.00
  13   3   2 1454.55   44.20
  13   3   2 1516.75   44.60
 -13   3  -2 1443.56   45.40
 -13   3  -2 1466.15   45.70
 -15  -3  -2  570.24   23.30
  15  -3   2  561.04   25.00
 -15  -3  -2  608.14   26.00
 -15  -3  -2  597.64   25.30
  15  -3   2  561.34   25.70
  15  -3   2  568.24   25.00
  15  -3   2  572.34   25.00
  15   3   2  573.04   25.30
  15   3   2  576.14   23.90
  15   3   2  576.54   23.70
  15   3   2  584.64   24.30
 -15   3  -2  554.54   24.90
 -15   3  -2  581.44   24.50
 -15   3  -2  566.44   27.20
  17  -3   2   31.30    8.50
 -17  -3  -2   19.40    6.40
 -17  -3  -2   28.90    7.30
  17  -3   2   19.70    7.90
  17  -3   2   26.60    8.00
 -17  -3  -2   22.30    6.80
  17  -3   2   26.30    7.80
  17   3   2    6.20    7.20
  17   3   2   15.40    7.20
  17   3   2   12.90    7.40
 -17   3  -2   24.30    6.10
 -17   3  -2   10.60    7.20
  17   3   2   21.00    7.10
 -17   3  -2   28.80    8.00
  19  -3   2   23.70    9.30
  19  -3   2   41.30    9.70
 -19  -3  -2   30.70    8.50
 -19  -3  -2   37.80    9.10
  19  -3   2   42.20   10.30
 -19  -3  -2   37.90    8.20
 -19   3  -2   38.60    8.60
  19   3   2   26.40    8.60
  19   3   2   18.20    9.00
  19   3   2   41.90    8.80
 -19   3  -2   37.50    8.00
 -19   3  -2   49.30    9.60
 -19   3  -2   38.10    8.60
  19   3   2   32.40    8.80
 -21  -3  -2   23.80    8.10
 -21  -3  -2   22.90    9.10
 -21  -3  -2    7.10    8.20
  21  -3   2   32.30   10.10
  21  -3   2   15.20    9.80
  21  -3   2   17.70    9.30
  21   3   2    2.80    9.70
 -21   3  -2   25.00    8.90
  21   3   2   10.20    8.90
 -21   3  -2   21.30    8.10
 -21   3  -2   19.40    9.00
  21   3   2   23.40    9.30
 -23  -3  -2   27.60    9.70
  23  -3   2   28.20   10.80
 -23  -3  -2   34.40    9.00
  23  -3   2   44.40   12.00
  23  -3   2   12.10    9.70
 -23  -3  -2    4.50    9.40
  23   3   2   14.60   10.20
  23   3   2   35.10   10.70
 -23   3  -2   24.40    8.80
 -23   3  -2   21.90   10.50
 -23   3  -2   22.10    8.60
  23   3   2    9.00    9.90
  25  -3   2   32.40   12.20
 -25  -3  -2   35.90    9.50
  25  -3   2   27.30   12.20
 -25  -3  -2   29.80   10.60
 -25   3  -2   11.20   11.30
  25   3   2   12.70   11.00
  25   3   2   22.10   11.50
 -25   3  -2   13.10    9.00
  25   3   2    4.60   10.70
 -25   3  -2   24.00   10.10
 -26  -4   2   -3.40    6.80
  26  -4  -2   -9.20   10.40
 -26  -4   2   -7.70    8.40
  26  -4  -2    0.60   11.50
 -26   4   2   -1.70    9.40
 -26   4   2   -2.80    8.10
  26   4  -2    0.60    9.70
  26   4  -2   -4.90    9.10
 -24  -4   2    8.10    7.00
  24  -4  -2   29.60   11.90
  24  -4  -2   -2.90   10.30
  24  -4  -2   22.70   11.60
 -24  -4   2   -7.80    7.70
 -24  -4   2   -3.80    8.50
 -24   4   2   12.90    8.30
  24   4  -2    9.00    9.10
  24   4  -2    2.20    8.30
  24   4  -2    7.20    8.40
 -24   4   2   18.80    9.80
 -22  -4   2  139.89   14.80
 -22  -4   2  110.49   17.90
 -22  -4   2  117.49   17.30
  22  -4  -2  181.08   17.10
  22  -4  -2  166.58   22.80
  22  -4  -2  178.18   20.60
  22   4  -2  155.78   16.00
  22   4  -2  128.59   18.10
 -22   4   2  185.48   21.00
 -22   4   2  180.38   17.80
 -22   4   2  162.08   16.60
  22   4  -2  135.99   17.80
 -22   4   2  174.28   14.90
  20  -4  -2  463.95   28.50
  20  -4  -2  499.35   22.50
 -20  -4   2  402.76   20.80
 -20  -4   2  424.66   24.40
 -20  -4   2  420.56   23.90
  20  -4  -2  462.25   26.50
  20   4  -2  404.16   23.50
  20   4  -2  444.06   21.60
  20   4  -2  402.36   24.50
 -20   4   2  424.46   22.40
 -20   4   2  438.36   28.00
 -20   4   2  456.65   24.60
  18  -4  -2  144.09   19.50
 -18  -4   2  137.89   12.00
 -18  -4   2  140.09   14.30
  18  -4  -2  120.29   13.60
  18  -4  -2  117.99   16.60
 -18  -4   2  126.49   13.70
 -18   4   2  102.69   15.20
 -18   4   2  140.19   13.40
  18   4  -2  109.89   14.40
  18   4  -2  108.19   14.10
 -18   4   2  112.79   17.30
  18   4  -2  123.49   12.70
  16  -4  -2  113.99   15.00
 -16  -4   2  127.79   10.40
 -16  -4   2  131.79   12.10
 -16  -4   2  141.79   12.80
  16  -4  -2  110.99   12.00
  16  -4  -2  121.79   17.90
 -16   4   2  111.49   11.50
 -16   4   2  107.39   13.50
 -16   4   2  111.89   15.20
  16   4  -2  111.29   12.30
  16   4  -2  117.79   10.80
  16   4  -2  122.19   13.10
 -14  -4   2  417.96   18.70
  14  -4  -2  383.76   17.60
  14  -4  -2  391.46   20.80
 -14  -4   2  409.56   16.90
 -14  -4   2  408.76   19.00
  14  -4  -2  410.56   23.10
 -14   4   2  399.16   21.60
 -14   4   2  403.06   14.30
  14   4  -2  420.56   18.20
  14   4  -2  398.96   15.60
 -14   4   2  418.56   20.70
  14   4  -2  396.16   19.70
 -14   4   2  405.26   18.00
  14   4  -2  419.36   16.80
  12  -4  -2  415.26   17.40
 -12  -4   2  476.35   17.50
  12  -4  -2  459.15   18.00
  12  -4  -2  466.75   21.30
 -12  -4   2  460.85   19.10
 -12  -4   2  468.45   18.50
  12  -4  -2  489.95   18.00
  12  -4  -2  467.15   22.60
 -12  -4   2  466.15   16.80
  12   4  -2  439.26   16.50
 -12   4   2  481.45   21.30
 -12   4   2  471.75   15.90
 -12   4   2  458.65   21.70
  12   4  -2  441.36   16.80
  12   4  -2  464.25   18.20
  12   4  -2  458.95   19.80
 -12   4   2  446.96   17.90
 -10  -4   2 1996.70   53.19
  10  -4  -2 1906.41   53.09
 -10  -4   2 1943.11   52.19
  10  -4  -2 1970.60   56.59
  10  -4  -2 1875.51   52.89
 -10  -4   2 2066.19   55.09
  10  -4  -2 1896.91   56.29
  10  -4  -2 1893.71   53.09
 -10  -4   2 2025.90   53.89
 -10   4   2 1843.32   52.19
 -10   4   2 1847.42   56.99
  10   4  -2 2017.40   53.59
 -10   4   2 1914.61   53.09
 -10   4   2 1859.21   57.49
  10   4  -2 1956.90   52.19
  10   4  -2 2012.90   52.89
  10   4  -2 2071.49   56.29
   8  -4  -2 2021.70   56.89
  -8  -4   2 2093.09   55.39
   8  -4  -2 1984.10   53.19
   8  -4  -2 1960.60   54.19
   8  -4  -2 2012.90   54.29
  -8  -4   2 2074.59   54.29
   8  -4  -2 2036.00   56.59
  -8  -4   2 1996.60   52.89
  -8  -4   2 2054.09   54.19
  -8   4   2 1970.80   53.29
  -8   4   2 1893.81   57.49
   8   4  -2 2021.90   53.79
  -8   4   2 1961.30   53.69
   8   4  -2 2023.30   52.99
  -8   4   2 1960.60   58.09
   8   4  -2 2074.19   56.39
   8   4  -2 2097.19   54.29
  -8   4   2 2023.70   53.99
   6  -4  -2 3096.29   81.89
   6  -4  -2 3102.59   83.79
   6  -4  -2 3060.79   81.49
  -6  -4   2 3350.26   82.49
  -6  -4   2 3203.98   80.49
   6  -4  -2 3255.47   83.49
  -6  -4   2 3269.57   81.79
  -6  -4   2 3328.67   81.29
   6  -4  -2 3009.10   79.89
   6   4  -2 3251.47   82.09
  -6   4   2 3108.09   80.09
  -6   4   2 3037.10   85.39
   6   4  -2 3138.89   80.19
   6   4  -2 3249.27   83.39
  -6   4   2 3054.49   81.79
   6   4  -2 3254.67   80.89
   6   4  -2 3353.56   80.59
  -6   4   2 3065.39   84.29
  -6   4   2 3040.70   81.29
  -4  -4   2    8.80    2.30
  -4  -4   2    7.10    1.80
  -4  -4   2   11.10    2.50
  -4  -4   2    9.10    1.90
   4  -4  -2    4.70    2.10
   4  -4  -2    5.50    2.70
   4  -4  -2    5.70    2.40
  -4   4   2    4.70    1.90
  -4   4   2    4.60    2.00
   4   4  -2    8.60    2.40
   4   4  -2    4.90    2.00
   4   4  -2    8.90    1.70
   4   4  -2    8.50    1.80
  -4   4   2    7.90    2.50
  -4   4   2    6.70    2.80
  -2  -4   2 1729.53   44.00
  -2  -4   2 1654.13   44.00
  -2  -4   2 1666.53   44.90
   2  -4  -2 1624.24   44.00
  -2  -4   2 1682.23   44.40
   2  -4  -2 1683.43   44.70
   2  -4  -2 1670.33   45.00
   2   4  -2 1740.93   45.10
   2   4  -2 1733.33   44.90
  -2   4   2 1625.04   47.20
  -2   4   2 1643.74   45.00
  -2   4   2 1593.34   45.30
   2   4  -2 1689.63   45.00
  -2   4   2 1684.03   44.30
   0  -4  -2 2188.18   56.39
   0  -4   2 2130.89   55.89
   0  -4  -2 2186.78   56.19
   0  -4   2 2144.89   55.99
   0  -4   2 2171.38   56.99
   0  -4  -2 2103.69   55.69
   0  -4   2 2200.78   56.59
   0   4   2 2115.59   56.99
   0   4   2 2048.40   56.99
   0   4  -2 2127.89   56.39
   0   4  -2 2141.29   55.29
   0   4   2 2170.28   58.09
   0   4   2 2126.59   55.69
   0   4  -2 2228.68   57.39
   0   4  -2 2134.49   55.99
  -2  -4  -2 2259.67   58.69
  -2  -4  -2 2284.67   57.59
   2  -4   2 2252.87   59.99
   2  -4   2 2268.87   60.09
   2  -4   2 2195.98   58.49
  -2  -4  -2 2275.37   58.49
   2  -4   2 2202.28   59.19
   2   4   2 2228.58   58.79
  -2   4  -2 2217.18   58.49
   2   4   2 2271.57   59.99
   2   4   2 2294.77   58.59
  -2   4  -2 2228.58   59.19
   2   4   2 2261.87   58.49
   2   4   2 2220.58   59.69
  -2   4  -2 2219.38   60.19
  -4  -4  -2 1164.18   32.60
  -4  -4  -2 1158.98   32.40
   4  -4   2 1178.68   34.20
   4  -4   2 1172.38   34.60
   4  -4   2 1205.88   33.10
   4  -4   2 1162.68   34.30
  -4  -4  -2 1187.28   32.80
   4   4   2 1182.38   32.70
   4   4   2 1164.88   34.40
  -4   4  -2 1159.28   34.50
   4   4   2 1138.29   32.60
  -4   4  -2 1160.48   34.00
  -4   4  -2 1129.09   31.90
   4   4   2 1121.89   33.40
  -6  -4  -2   10.90    2.60
   6  -4   2    6.00    2.40
   6  -4   2    2.00    3.70
   6  -4   2    9.50    3.40
  -6  -4  -2    6.40    2.50
  -6  -4  -2    9.90    2.80
  -6   4  -2    8.20    3.00
   6   4   2    7.70    2.70
  -6   4  -2    6.30    2.90
   6   4   2   11.40    3.30
   6   4   2    8.50    2.60
  -6   4  -2    6.90    2.70
  -6   4  -2    6.30    1.90
   6   4   2    9.60    2.80
   8  -4   2  264.27   12.80
  -8  -4  -2  285.87   12.20
   8  -4   2  267.87   13.40
  -8  -4  -2  298.87   13.50
   8  -4   2  250.07   13.90
  -8  -4  -2  293.57   12.50
  -8  -4  -2  299.67   12.70
   8  -4   2  268.37   15.10
   8   4   2  305.47   12.50
   8   4   2  302.97   14.20
  -8   4  -2  281.77   13.00
  -8   4  -2  262.47   14.30
  -8   4  -2  279.57   14.40
  -8   4  -2  281.67   10.60
   8   4   2  292.67   12.90
   8   4   2  313.07   12.80
 -10  -4  -2 1648.04   48.50
 -10  -4  -2 1629.24   47.50
  10  -4   2 1579.34   48.60
  10  -4   2 1581.04   48.00
  10  -4   2 1610.34   48.20
 -10  -4  -2 1696.33   47.40
 -10  -4  -2 1692.03   47.40
  10  -4   2 1672.43   50.09
  10   4   2 1701.53   46.20
 -10   4  -2 1661.53   50.79
  10   4   2 1720.53   49.90
 -10   4  -2 1617.04   49.50
  10   4   2 1641.14   47.10
 -10   4  -2 1663.63   44.00
  10   4   2 1675.83   47.30
 -10   4  -2 1637.74   48.20
  10   4   2 1742.53   48.10
  12  -4   2 1763.22   52.99
 -12  -4  -2 1750.52   53.19
 -12  -4  -2 1805.82   51.89
  12  -4   2 1753.82   53.09
 -12  -4  -2 1785.82   52.79
  12  -4   2 1827.92   55.09
 -12  -4  -2 1817.42   51.89
  12  -4   2 1803.32   53.69
  12   4   2 1761.42   51.69
  12   4   2 1795.62   51.99
 -12   4  -2 1775.12   52.99
 -12   4  -2 1890.11   54.69
 -12   4  -2 1812.12   55.99
  12   4   2 1841.92   54.79
  12   4   2 1843.42   52.69
 -14  -4  -2  567.84   22.80
  14  -4   2  565.74   24.50
  14  -4   2  586.04   24.40
 -14  -4  -2  558.94   23.90
  14  -4   2  554.24   25.80
 -14  -4  -2  546.85   24.00
  14  -4   2  547.75   24.40
 -14   4  -2  586.44   24.60
  14   4   2  561.84   23.10
 -14   4  -2  565.24   26.60
 -14   4  -2  550.14   23.80
  14   4   2  572.64   23.50
  14   4   2  565.84   25.10
  14   4   2  574.14   23.30
 -16  -4  -2  105.59   13.70
  16  -4   2   92.09   15.00
  16  -4   2  131.89   16.00
 -16  -4  -2  108.49   14.20
  16  -4   2  115.09   15.50
 -16  -4  -2  102.09   12.50
  16  -4   2  137.59   14.30
 -16   4  -2  134.89   14.30
  16   4   2   99.49   13.80
  16   4   2  108.89   14.30
  16   4   2   95.99   13.60
  16   4   2  118.69   13.70
 -16   4  -2  133.19   16.10
 -16   4  -2  107.49   13.70
  18  -4   2    0.20    6.80
  18  -4   2    3.70    7.90
 -18  -4  -2    0.10    5.80
 -18  -4  -2   -3.00    6.00
 -18  -4  -2   -1.30    6.70
  18  -4   2   14.70    7.80
  18  -4   2    1.70    8.20
 -18   4  -2    9.10    6.40
  18   4   2   -5.60    6.70
 -18   4  -2   11.20    7.10
  18   4   2    0.30    6.40
 -18   4  -2    8.70    7.30
  18   4   2   -6.60    6.80
  18   4   2   -5.60    7.00
 -20  -4  -2   -3.70    8.80
  20  -4   2   11.50    8.60
  20  -4   2    6.80    8.30
 -20  -4  -2    4.90    7.70
  20  -4   2   21.70   10.10
 -20  -4  -2    3.40    6.70
 -20   4  -2    9.20    8.00
 -20   4  -2   11.00    7.20
  20   4   2   -8.70    8.20
  20   4   2   -2.60    7.30
 -20   4  -2    4.00    7.60
  20   4   2   10.60    8.10
  22  -4   2   67.89   11.80
  22  -4   2   49.80   11.70
 -22  -4  -2   51.59    9.70
 -22  -4  -2   45.40   10.30
  22  -4   2   63.89   12.70
  22   4   2   53.89   10.60
 -22   4  -2   51.79    9.60
  22   4   2   39.90   11.00
  22   4   2   21.70   10.90
 -22   4  -2   49.90   11.30
  24  -4   2   62.59   12.80
 -24  -4  -2  108.59   17.60
  24  -4   2   78.09   13.10
 -24  -4  -2   64.69   12.30
 -24   4  -2  117.79   22.40
  24   4   2   67.89   12.30
  24   4   2   66.39   13.30
 -24   4  -2  112.99   18.00
  24   4   2   57.59   13.50
 -24   4  -2  100.89   16.70
 -27  -5   2   -2.30    7.90
 -27  -5   2   14.00    8.30
  27  -5  -2   13.80   13.10
  27  -5  -2   15.00   15.50
  27   5  -2   -2.60    9.70
 -25  -5   2   16.70    7.40
 -25  -5   2    2.70    6.90
 -25  -5   2   -7.00    8.60
  25  -5  -2   16.40   12.10
  25  -5  -2   19.60   12.70
  25   5  -2    3.50    9.50
  25   5  -2    3.00    9.70
 -25   5   2   -3.60   10.10
  25   5  -2   12.60    8.60
 -25   5   2    5.20    8.40
  23  -5  -2   39.90   12.30
 -23  -5   2   19.40    7.20
 -23  -5   2    3.20    8.80
  23  -5  -2   34.20    9.80
  23  -5  -2   38.40   12.60
 -23  -5   2   23.90    7.50
 -23   5   2   16.60    8.50
  23   5  -2   22.60    8.50
 -23   5   2   14.70   10.00
  23   5  -2   22.60    9.60
 -23   5   2   18.40    8.10
  23   5  -2    3.60    8.70
 -21  -5   2   32.40    7.60
  21  -5  -2   41.60   12.20
  21  -5  -2   46.90   11.80
  21  -5  -2   54.99    9.30
 -21  -5   2   20.40    8.70
 -21  -5   2   37.30    7.50
  21   5  -2   27.60    9.60
  21   5  -2   31.30    8.90
 -21   5   2   43.10    8.50
  21   5  -2   39.70    8.50
 -21   5   2   46.80    9.50
 -21   5   2   51.49   11.50
 -19  -5   2   90.19   11.50
  19  -5  -2   77.79   13.00
 -19  -5   2   47.40    8.90
 -19  -5   2   73.79   12.90
  19  -5  -2  108.99   18.20
 -19  -5   2   60.39    8.80
  19  -5  -2   98.69   14.10
  19   5  -2   57.09    9.70
 -19   5   2  102.19   15.60
  19   5  -2   47.90    9.80
 -19   5   2   90.19   13.10
 -19   5   2  102.39   17.70
  19   5  -2   86.09   12.10
 -17  -5   2   26.60    6.00
  17  -5  -2   28.80   10.20
 -17  -5   2   24.30    5.50
  17  -5  -2   27.10    8.80
 -17  -5   2   18.30    6.10
  17  -5  -2   24.70    6.80
 -17  -5   2   22.60    5.70
 -17   5   2   19.90    7.60
  17   5  -2   21.60    5.80
 -17   5   2   17.10    6.90
  17   5  -2    8.80    6.60
 -17   5   2   22.40    6.60
  17   5  -2    6.30    6.60
 -15  -5   2   62.19    8.60
  15  -5  -2   49.90    7.20
 -15  -5   2   49.80    8.20
  15  -5  -2   44.40    9.90
 -15  -5   2   56.69    9.10
 -15  -5   2   42.00    6.90
  15  -5  -2   44.50    8.90
  15   5  -2   34.80    5.80
  15   5  -2   36.00    7.10
 -15   5   2   34.20    8.00
 -15   5   2   42.70    6.60
  15   5  -2   37.10    6.70
  15   5  -2   39.20    5.50
 -15   5   2   41.20    7.70
  13  -5  -2   81.49    8.40
  13  -5  -2   56.39    7.00
 -13  -5   2   75.29    8.10
  13  -5  -2   60.19    9.50
 -13  -5   2   66.79    8.20
 -13  -5   2   76.09    9.20
 -13  -5   2   62.29    7.50
  13  -5  -2   51.49    8.70
 -13   5   2   67.79   10.80
 -13   5   2   73.59    6.70
 -13   5   2   69.89   10.70
  13   5  -2   76.69    7.60
 -13   5   2   74.99    8.30
  13   5  -2   57.59    7.70
  13   5  -2   68.79    9.40
  13   5  -2   72.59    8.80
 -11  -5   2   43.10    6.30
 -11  -5   2   46.20    7.30
 -11  -5   2   43.40    5.90
 -11  -5   2   45.90    6.70
  11  -5  -2   55.39    6.50
  11  -5  -2   38.10    5.70
  11  -5  -2   40.90    7.10
  11  -5  -2   35.10    6.90
 -11   5   2   45.20    6.50
  11   5  -2   31.00    5.40
 -11   5   2   49.90    9.00
  11   5  -2   41.30    6.20
 -11   5   2   55.79    6.10
  11   5  -2   42.10    6.20
 -11   5   2   47.10    8.80
  11   5  -2   49.20    7.20
   9  -5  -2  502.75   20.90
   9  -5  -2  513.55   19.10
   9  -5  -2  481.85   17.90
  -9  -5   2  511.15   17.70
  -9  -5   2  517.85   19.30
   9  -5  -2  499.05   17.10
   9  -5  -2  500.05   21.60
  -9  -5   2  523.65   17.30
  -9  -5   2  534.15   18.70
   9   5  -2  529.15   20.50
   9   5  -2  531.35   17.40
  -9   5   2  522.25   18.00
  -9   5   2  516.95   17.90
  -9   5   2  519.35   21.80
  -9   5   2  503.05   22.00
  -9   5   2  504.85   17.30
   9   5  -2  515.75   18.00
   9   5  -2  527.25   18.60
  -7  -5   2  250.87   11.80
   7  -5  -2  238.88   13.90
   7  -5  -2  244.28   12.00
  -7  -5   2  256.97   10.50
  -7  -5   2  236.78   12.00
   7  -5  -2  239.78    9.80
  -7  -5   2  253.07   10.60
   7  -5  -2  254.17   13.40
   7  -5  -2  266.47   11.60
   7   5  -2  253.77   12.70
   7   5  -2  269.47   10.00
  -7   5   2  262.07   11.10
  -7   5   2  251.17   10.00
  -7   5   2  233.98   13.70
   7   5  -2  259.57   10.80
   7   5  -2  245.08   11.60
   7   5  -2  266.77   10.60
  -7   5   2  250.97   14.80
  -7   5   2  234.18   11.40
   5  -5  -2  233.48   11.40
  -5  -5   2  242.98    9.60
  -5  -5   2  251.07    9.80
  -5  -5   2  233.98   10.90
  -5  -5   2  241.08   11.10
   5  -5  -2  229.78   12.30
   5  -5  -2  219.58   10.70
   5   5  -2  250.87   10.00
   5   5  -2  242.48   11.40
  -5   5   2  226.68   10.20
   5   5  -2  250.67    9.50
   5   5  -2  233.58   10.90
  -5   5   2  217.68   10.80
  -5   5   2  208.68   11.90
  -5   5   2  215.18   13.50
  -3  -5   2   66.89    5.60
   3  -5  -2   71.39    6.20
  -3  -5   2   72.09    6.10
   3  -5  -2   70.99    6.10
  -3  -5   2   76.09    5.30
   3  -5  -2   64.19    6.80
  -3  -5   2   62.89    6.40
  -3   5   2   67.09    6.00
   3   5  -2   75.69    6.10
   3   5  -2   76.59    6.10
   3   5  -2   80.49    4.70
  -3   5   2   57.79    8.10
  -3   5   2   72.29    6.00
   3   5  -2   71.19    6.10
  -3   5   2   58.89    6.40
  -3   5   2   53.69    6.20
  -1  -5   2   61.19    5.20
  -1  -5   2   57.89    5.60
  -1  -5   2   51.29    5.90
   1  -5  -2   52.19    5.50
   1  -5  -2   56.39    5.50
  -1  -5   2   60.09    4.90
   1  -5  -2   62.39    6.10
  -1   5   2   57.29    5.30
  -1   5   2   63.29    7.30
   1   5  -2   60.49    5.50
   1   5  -2   64.89    5.00
   1   5  -2   60.89    4.80
  -1   5   2   51.79    5.80
   1   5  -2   59.09    5.70
  -1   5   2   57.39    6.00
   1  -5   2  321.97   11.90
  -1  -5  -2  308.87   10.60
   1  -5   2  321.37   13.30
   1  -5   2  323.27   13.30
  -1  -5  -2  310.27   12.30
  -1  -5  -2  321.27   12.10
  -1  -5  -2  309.27   12.20
   1  -5   2  320.87   12.10
   1   5   2  309.57   13.10
   1   5   2  299.97   11.80
  -1   5  -2  334.47   13.50
  -1   5  -2  321.57   11.00
   1   5   2  325.67   13.90
  -1   5  -2  324.27   12.10
  -1   5  -2  323.77   12.40
   1   5   2  310.67   13.30
  -3  -5  -2  486.45   15.80
   3  -5   2  518.15   16.80
   3  -5   2  506.55   18.80
  -3  -5  -2  480.45   16.70
  -3  -5  -2  506.35   17.10
   3  -5   2  520.75   18.50
   3  -5   2  519.15   17.80
   3   5   2  495.35   18.30
  -3   5  -2  490.75   16.60
  -3   5  -2  512.25   17.60
  -3   5  -2  522.95   18.90
   3   5   2  486.45   16.70
   3   5   2  476.95   18.00
   3   5   2  479.55   16.80
   3   5   2  461.95   16.60
   5  -5   2   32.40    5.30
  -5  -5  -2   39.60    5.50
   5  -5   2   26.80    5.10
   5  -5   2   34.20    5.00
  -5  -5  -2   35.90    5.40
   5  -5   2   34.10    6.20
  -5  -5  -2   46.10    5.50
   5   5   2   44.10    5.70
   5   5   2   38.50    5.50
   5   5   2   43.70    6.50
   5   5   2   42.90    6.20
  -5   5  -2   31.90    6.10
  -5   5  -2   25.10    4.70
  -5   5  -2   23.50    3.40
  -7  -5  -2    2.50    2.80
   7  -5   2    2.10    3.80
   7  -5   2    4.60    4.60
   7  -5   2   14.60    4.20
  -7  -5  -2    4.90    3.30
  -7  -5  -2    8.10    3.10
   7  -5   2    7.20    3.10
  -7   5  -2    8.20    3.50
   7   5   2    8.10    3.10
  -7   5  -2    6.90    2.50
   7   5   2    6.50    3.10
  -7   5  -2    5.30    3.00
   7   5   2    6.40    3.10
  -7   5  -2    8.00    3.90
   7   5   2   10.10    3.70
  -9  -5  -2   64.49    6.50
  -9  -5  -2   56.09    8.00
   9  -5   2   65.59    8.00
   9  -5   2   55.59    8.10
  -9  -5  -2   64.59    7.60
   9  -5   2   64.29    9.60
  -9  -5  -2   79.19    7.70
  -9   5  -2   71.69    5.90
   9   5   2   69.79    8.10
   9   5   2   70.29    7.60
  -9   5  -2   61.99    8.00
  -9   5  -2   72.29    9.40
   9   5   2   74.19    7.70
  -9   5  -2   70.49    9.50
   9   5   2   67.39    8.50
 -11  -5  -2  211.88   11.90
  11  -5   2  249.28   14.00
  11  -5   2  213.18   16.70
 -11  -5  -2  235.28   12.80
 -11  -5  -2  211.98   12.70
  11  -5   2  196.58   15.20
  11  -5   2  211.88   14.70
 -11  -5  -2  211.88   13.30
 -11   5  -2  228.48   13.70
  11   5   2  227.58   12.30
  11   5   2  209.88   12.70
 -11   5  -2  241.68   15.60
  11   5   2  234.58   14.60
 -11   5  -2  270.67   15.50
 -11   5  -2  257.87   10.30
  11   5   2  236.88   13.50
 -13  -5  -2   34.40    6.30
  13  -5   2   44.60    7.60
 -13  -5  -2   34.30    6.50
 -13  -5  -2   31.90    5.50
 -13  -5  -2   38.00    6.30
  13  -5   2   42.00    8.30
  13  -5   2   38.60    7.40
  13   5   2   64.29   10.60
  13   5   2   33.10    6.50
 -15  -5  -2   56.79    8.40
  15  -5   2  101.99   14.60
 -15  -5  -2   58.29    8.80
  15  -5   2   71.69   11.00
 -15  -5  -2   70.49   12.30
 -15  -5  -2   59.69    8.20
  15  -5   2   63.39    9.70
  15   5   2   49.99    8.70
 -15   5  -2   93.99   15.10
  15   5   2   81.69   13.20
  15   5   2   53.89    8.80
  17  -5   2   21.80    8.00
 -17  -5  -2   23.20    6.90
  17  -5   2   16.50    7.80
  17  -5   2   30.00    8.60
  17  -5   2   24.50    9.60
 -17  -5  -2    8.50    6.60
 -17  -5  -2   11.70    7.10
  17   5   2   13.10    7.30
 -17   5  -2   18.60    8.90
 -17   5  -2   11.90    7.20
 -17   5  -2   21.80    7.20
  17   5   2    9.50    7.60
  17   5   2    2.80    7.20
 -19  -5  -2    7.20    7.70
 -19  -5  -2   12.90    7.00
  19  -5   2    8.90    8.60
 -19  -5  -2    8.30    6.50
  19  -5   2   -3.80    7.40
  19  -5   2   12.70    9.50
  19  -5   2   10.10    8.80
 -19   5  -2   -0.40    6.60
  19   5   2   -5.60    7.60
  19   5   2    8.50    7.70
 -19   5  -2    4.30    8.30
 -19   5  -2    2.70    7.30
  19   5   2  -14.10    7.90
 -21  -5  -2   23.60    8.50
  21  -5   2   31.40   12.00
  21  -5   2   44.80   11.10
 -21  -5  -2   32.80    9.00
 -21  -5  -2   33.40    8.70
  21  -5   2   27.00   10.30
  21   5   2    4.00    9.90
  21   5   2   26.80    9.80
 -21   5  -2   30.20    9.80
 -21   5  -2   30.90   10.60
 -21   5  -2   31.40    9.50
  21   5   2   11.40   10.00
 -23  -5  -2   14.70    8.60
 -23  -5  -2    2.30    8.10
  23  -5   2   18.20   11.70
 -23  -5  -2    9.30    8.00
  23  -5   2    8.40    9.90
 -23   5  -2   14.40    7.70
 -23   5  -2   13.10   10.20
  23   5   2   -8.50    9.50
  23   5   2   -5.80    9.00
 -23   5  -2   17.30    9.20
  25  -5   2   14.40   11.10
 -25  -5  -2    9.30    8.80
 -25  -5  -2   18.80    8.80
 -25   5  -2   20.80    9.70
 -25   5  -2   16.70    9.00
  25   5   2    5.30    9.90
 -26  -6   2    9.30    7.70
  26  -6  -2   18.70   13.40
 -26  -6   2   10.00   11.10
 -26  -6   2    0.20    8.90
  26  -6  -2   12.00   12.70
  26   6  -2   -3.00    9.80
  26   6  -2    3.50    9.00
 -26   6   2   -0.10   11.80
  26   6  -2   -1.10   10.60
  24  -6  -2   26.30   12.70
  24  -6  -2   21.70   12.80
 -24  -6   2   12.20    8.60
 -24  -6   2   18.20    7.10
 -24  -6   2    6.30    7.20
  24   6  -2    9.90    8.20
 -24   6   2    1.90    8.80
  24   6  -2   13.90    9.60
  24   6  -2   -0.60    8.80
 -24   6   2   -0.30    9.80
 -22  -6   2   25.70    7.30
 -22  -6   2   23.50    7.40
  22  -6  -2   25.10   12.00
 -22  -6   2   17.30    8.60
  22  -6  -2   31.90   11.80
  22  -6  -2   28.60    9.60
  22   6  -2   23.60    9.10
  22   6  -2   23.70    7.70
 -22   6   2    9.70    9.50
  22   6  -2   15.30    9.40
 -22   6   2    7.70    9.00
 -22   6   2   10.90    8.00
 -20  -6   2   15.60    7.80
 -20  -6   2   14.40    6.30
  20  -6  -2   29.90   11.50
  20  -6  -2   21.90   10.60
 -20  -6   2   13.30    6.80
  20  -6  -2   11.40    8.00
  20   6  -2   14.50    7.70
  20   6  -2   18.10    7.50
 -20   6   2    4.10    8.10
 -20   6   2   12.70    6.70
 -20   6   2   10.80    8.60
  20   6  -2   24.90    7.40
 -18  -6   2   17.30    7.90
 -18  -6   2   41.10    6.70
  18  -6  -2   36.20   11.40
  18  -6  -2   43.10   10.90
 -18  -6   2   17.70    7.50
  18  -6  -2   34.60    8.00
 -18  -6   2   22.00    6.90
 -18   6   2   31.20    7.00
  18   6  -2   38.70    8.10
 -18   6   2   31.60    9.30
  18   6  -2   32.80    8.70
  18   6  -2   43.50    7.30
 -18   6   2   25.80    8.10
  16  -6  -2   10.90    8.20
  16  -6  -2   -2.80    4.10
 -16  -6   2   -7.80    4.60
  16  -6  -2   -2.60    5.20
  16  -6  -2    4.50    9.00
 -16  -6   2    0.60    4.10
 -16  -6   2    1.60    4.40
 -16  -6   2    0.90    4.70
 -16   6   2   -1.20    4.40
 -16   6   2    4.10    6.10
 -16   6   2   -0.10    5.50
  16   6  -2   -1.60    4.50
  16   6  -2   -7.80    5.50
  16   6  -2  -10.70    5.10
 -14  -6   2  142.49   11.40
  14  -6  -2  132.09   16.10
  14  -6  -2  133.09   10.80
  14  -6  -2  125.39   12.20
 -14  -6   2  137.59   10.60
 -14  -6   2  112.99   10.30
  14  -6  -2  135.19   17.90
 -14  -6   2  135.29   12.10
 -14   6   2  128.89   10.70
 -14   6   2  138.69   14.20
  14   6  -2  106.29   11.90
 -14   6   2  143.49    9.50
 -14   6   2  149.99   14.50
  14   6  -2  110.69   10.60
  14   6  -2  111.39   12.90
  14   6  -2  117.79   10.90
 -12  -6   2  244.08   14.10
 -12  -6   2  252.17   13.50
  12  -6  -2  240.08   12.30
 -12  -6   2  212.28   12.30
  12  -6  -2  225.28   17.10
  12  -6  -2  214.48   16.60
 -12  -6   2  264.47   12.70
  12  -6  -2  234.48   14.00
 -12   6   2  252.67   12.50
  12   6  -2  259.47   15.30
  12   6  -2  269.17   13.50
 -12   6   2  245.18   16.50
  12   6  -2  246.08   13.70
  12   6  -2  215.08   12.60
 -12   6   2  231.28   16.00
 -12   6   2  241.68   11.90
  10  -6  -2  650.53   23.50
  10  -6  -2  662.73   21.60
  10  -6  -2  662.53   25.50
 -10  -6   2  676.93   22.20
 -10  -6   2  690.83   23.60
  10  -6  -2  635.84   22.10
  10  -6  -2  659.63   26.40
 -10  -6   2  648.24   22.00
 -10  -6   2  676.93   24.10
  10   6  -2  676.73   25.30
 -10   6   2  683.83   22.10
 -10   6   2  641.74   27.00
 -10   6   2  664.63   21.80
 -10   6   2  655.23   22.40
  10   6  -2  684.23   23.50
  10   6  -2  668.63   22.20
 -10   6   2  651.83   26.50
  10   6  -2  677.33   22.80
   8  -6  -2  610.44   21.70
   8  -6  -2  611.04   24.10
   8  -6  -2  619.14   23.10
  -8  -6   2  621.54   21.70
  -8  -6   2  638.14   20.00
   8  -6  -2  598.04   19.20
  -8  -6   2  613.34   21.50
  -8  -6   2  628.14   20.20
   8  -6  -2  598.64   20.80
   8   6  -2  625.14   20.40
  -8   6   2  606.14   24.10
  -8   6   2  610.44   19.40
  -8   6   2  580.84   21.00
   8   6  -2  654.93   20.50
  -8   6   2  617.94   20.40
  -8   6   2  581.24   25.10
   8   6  -2  628.94   23.00
   8   6  -2  625.04   21.80
   6  -6  -2  667.83   23.20
  -6  -6   2  673.13   22.40
  -6  -6   2  671.23   21.00
   6  -6  -2  655.93   22.40
  -6  -6   2  663.03   20.40
  -6  -6   2  677.43   22.60
   6  -6  -2  652.23   19.50
   6  -6  -2  651.23   24.50
  -6   6   2  646.64   24.10
  -6   6   2  621.34   25.80
  -6   6   2  629.64   22.30
   6   6  -2  673.23   21.20
   6   6  -2  655.13   22.60
   6   6  -2  664.23   23.20
   6   6  -2  670.13   20.70
  -6   6   2  690.23   21.60
   4  -6  -2  212.28   11.30
  -4  -6   2  243.48   11.50
   4  -6  -2  214.28   12.60
   4  -6  -2  236.18   11.60
  -4  -6   2  241.18   10.80
  -4  -6   2  256.87   10.00
  -4  -6   2  248.48   12.30
   4   6  -2  257.87    9.60
  -4   6   2  209.38   11.00
  -4   6   2  193.78   13.90
   4   6  -2  259.47   11.30
   4   6  -2  252.47   11.80
  -4   6   2  199.28   11.80
  -4   6   2  201.18   11.60
   4   6  -2  261.17   11.90
  -2  -6   2    5.10    2.10
  -2  -6   2   -0.40    3.10
   2  -6  -2    2.30    3.00
   2  -6  -2    1.60    3.20
  -2  -6   2    4.30    2.70
  -2  -6   2   -0.10    2.70
   2  -6  -2    7.20    3.00
   2   6  -2    7.10    2.60
  -2   6   2    4.40    2.80
   2   6  -2    4.20    2.50
  -2   6   2   -1.60    2.90
   2   6  -2    5.00    2.60
   2   6  -2    6.00    2.10
   0  -6   2  451.25   15.70
   0  -6   2  431.16   17.00
   0  -6   2  446.06   17.00
   0  -6  -2  463.45   16.90
   0  -6  -2  464.55   14.20
   0  -6  -2  444.66   16.30
   0  -6  -2  459.45   16.30
   0  -6   2  433.76   15.50
   0   6   2  443.66   17.30
   0   6  -2  443.06   15.50
   0   6  -2  433.26   15.20
   0   6   2  450.75   18.90
   0   6  -2  444.16   16.50
   0   6   2  451.75   17.80
   0   6   2  451.55   15.90
   0   6  -2  441.36   17.40
   2  -6   2 1013.70   31.70
  -2  -6  -2  989.70   29.90
  -2  -6  -2 1016.00   30.20
   2  -6   2  937.21   28.90
  -2  -6  -2 1025.60   28.20
   2  -6   2  974.90   31.20
   2  -6   2  961.90   30.00
  -2  -6  -2 1020.80   30.00
  -2   6  -2  985.70   29.90
  -2   6  -2  981.50   31.90
   2   6   2  995.70   29.50
  -2   6  -2  978.90   29.90
   2   6   2 1029.90   31.60
   2   6   2  990.50   31.70
  -2   6  -2 1000.40   28.20
   2   6   2 1043.20   31.90
   4  -6   2   33.50    5.90
   4  -6   2   40.10    5.90
   4  -6   2   33.50    5.10
   4  -6   2   40.70    7.00
  -4  -6  -2   29.60    4.60
  -4  -6  -2   40.40    5.40
  -4  -6  -2   38.90    6.10
   4   6   2   33.00    5.20
   4   6   2   33.70    4.50
  -4   6  -2   40.20    7.50
  -4   6  -2   50.09    6.10
  -4   6  -2   43.10    6.60
   4   6   2   42.40    7.00
   4   6   2   39.10    6.20
   6  -6   2   41.20    6.30
   6  -6   2   38.40    5.80
   6  -6   2   32.60    6.30
  -6  -6  -2   41.20    6.40
  -6  -6  -2   49.30    6.40
  -6  -6  -2   40.50    6.70
   6   6   2   50.89    6.90
   6   6   2   34.20    4.80
  -6   6  -2   28.20    5.20
  -6   6  -2   41.20    5.90
  -6   6  -2   41.30    7.30
   6   6   2   54.49    7.40
   6   6   2   48.40    7.60
  -8  -6  -2   67.39    8.10
  -8  -6  -2   71.29    8.00
   8  -6   2   53.09    7.30
  -8  -6  -2   67.49    7.70
   8  -6   2   48.20    7.70
   8  -6   2   59.49    9.50
   8   6   2   81.29    9.30
   8   6   2   71.49    7.90
   8   6   2   77.99    8.50
  -8   6  -2   62.89    7.60
   8   6   2   63.79    8.00
  -8   6  -2   51.29    6.60
  -8   6  -2   58.69    9.40
  -8   6  -2   54.89    8.90
  10  -6   2  350.66   16.50
  10  -6   2  343.27   20.10
  10  -6   2  320.97   18.20
  10  -6   2  376.46   18.50
 -10  -6  -2  352.46   16.40
 -10  -6  -2  366.46   17.10
 -10  -6  -2  356.56   16.30
 -10   6  -2  349.17   18.80
  10   6   2  382.46   18.70
  10   6   2  359.66   16.40
 -10   6  -2  360.76   14.40
  10   6   2  391.16   17.20
  10   6   2  397.06   17.30
 -10   6  -2  354.76   18.90
 -10   6  -2  370.26   16.70
 -12  -6  -2  335.57   17.40
  12  -6   2  323.57   17.00
  12  -6   2  344.57   21.40
  12  -6   2  307.67   18.70
 -12  -6  -2  290.27   16.80
  12  -6   2  348.97   19.30
 -12  -6  -2  339.57   18.00
  12   6   2  392.76   19.90
 -12   6  -2  324.47   19.90
  12   6   2  353.36   18.20
 -12   6  -2  342.07   17.40
 -12   6  -2  309.37   13.80
  12   6   2  321.47   17.40
  12   6   2  388.86   17.30
 -12   6  -2  311.17   19.10
  14  -6   2  194.28   15.20
 -14  -6  -2  195.08   15.10
 -14  -6  -2  149.69   14.90
  14  -6   2  210.98   17.60
 -14  -6  -2  187.38   15.80
  14  -6   2  181.28   19.50
  14  -6   2  219.58   17.50
 -14   6  -2  189.08   18.00
 -14   6  -2  207.98   15.40
  14   6   2  202.28   16.10
  14   6   2  158.38   15.70
 -14   6  -2  197.38   17.20
  14   6   2  222.98   17.50
  16  -6   2   44.40    8.90
 -16  -6  -2   45.60    8.70
  16  -6   2   52.69   10.10
 -16  -6  -2   50.79    8.70
  16  -6   2   52.79   11.60
 -16   6  -2   53.59   10.60
  16   6   2   78.99   14.80
  16   6   2   49.00    9.40
 -16   6  -2   44.80    9.00
  16   6   2   36.30    8.80
 -16   6  -2   52.99    8.90
  18  -6   2    2.40    7.10
 -18  -6  -2    7.10    6.80
 -18  -6  -2    3.50    6.20
  18  -6   2   -0.80    9.80
  18  -6   2    5.70    8.90
  18  -6   2    4.00    8.30
 -18  -6  -2    4.50    6.40
 -18   6  -2   -0.50    7.60
 -18   6  -2    1.40    6.60
  18   6   2   -2.80    7.40
  18   6   2   12.10    7.30
  18   6   2   -7.70    7.10
 -18   6  -2    0.50    6.80
 -20  -6  -2   17.20    7.60
  20  -6   2    0.70   11.10
  20  -6   2   16.20    8.20
 -20  -6  -2   18.70    8.20
 -20  -6  -2   12.90    7.40
  20  -6   2    9.90    9.70
  20   6   2    5.20    8.50
  20   6   2   23.20    8.30
 -20   6  -2    7.30    7.70
  20   6   2    3.20    8.70
 -20   6  -2    7.10    9.30
 -20   6  -2    3.50    8.00
 -22  -6  -2   22.70    9.00
  22  -6   2   24.40   11.30
 -22  -6  -2   25.90    8.80
  22  -6   2   24.90   12.70
 -22  -6  -2   14.60    8.40
  22   6   2   20.60   10.40
 -22   6  -2   13.10   11.10
 -22   6  -2   15.30   10.60
  22   6   2   19.30   10.00
  22   6   2   15.40    9.20
 -22   6  -2   18.50    8.70
  24  -6   2   25.50   16.20
  24  -6   2   26.60   11.60
 -24  -6  -2   17.50    9.10
 -24  -6  -2   24.50    9.80
 -24  -6  -2   18.60    8.90
 -24   6  -2   26.30   10.10
  24   6   2    2.80   11.50
 -24   6  -2   13.40   14.00
  24   6   2   18.30   10.30
 -24   6  -2   16.50    9.20
  25  -7  -2  -14.10   11.60
 -25  -7   2    1.60    8.60
  25  -7  -2   -8.90   12.10
 -25   7   2   -3.30   10.20
  25   7  -2   -3.00    8.80
  25   7  -2  -10.90   12.80
 -25   7   2    4.00    8.60
  25   7  -2   -5.00    9.50
 -23  -7   2   38.50    9.90
 -23  -7   2   24.70    8.00
  23  -7  -2   40.20   13.60
  23  -7  -2   46.30   13.50
 -23  -7   2   47.30    9.60
  23   7  -2   34.10   10.40
 -23   7   2   39.00   10.20
  23   7  -2   27.20    8.80
  23   7  -2   31.50   11.00
 -23   7   2   35.50   12.10
 -21  -7   2   58.39   10.40
 -21  -7   2   58.39    8.90
  21  -7  -2   71.99   14.70
 -21  -7   2   62.39    9.60
  21  -7  -2   79.49   14.30
  21  -7  -2   64.89   10.90
  21   7  -2   60.29   11.60
 -21   7   2   49.99   12.70
 -21   7   2   51.09   11.50
  21   7  -2   59.59    9.30
  21   7  -2   66.79   11.00
 -19  -7   2  134.49   13.70
 -19  -7   2  122.59   16.50
  19  -7  -2  136.19   22.80
  19  -7  -2  150.48   16.30
  19  -7  -2  157.98   21.50
 -19  -7   2  126.29   15.00
  19   7  -2  145.79   14.30
 -19   7   2  119.39   19.10
  19   7  -2  125.89   15.80
  19   7  -2  144.29   18.00
 -19   7   2  140.19   20.30
 -17  -7   2   42.90    7.10
  17  -7  -2   38.60   11.40
  17  -7  -2   48.70    8.10
  17  -7  -2   42.00   11.40
 -17  -7   2   30.20    7.50
  17  -7  -2   37.10    6.90
 -17  -7   2   32.90    8.40
  17   7  -2   47.00    7.50
 -17   7   2   30.10    9.20
 -17   7   2   35.80    7.20
  17   7  -2   47.70    8.20
 -17   7   2   37.60    9.40
  17   7  -2   40.60    8.90
 -15  -7   2    7.10    6.50
  15  -7  -2   15.40    8.90
  15  -7  -2   27.50    7.10
 -15  -7   2   20.90    5.40
  15  -7  -2   28.00    5.50
  15  -7  -2   14.60    9.40
 -15  -7   2   13.30    5.80
 -15   7   2   26.00    5.60
  15   7  -2   18.40    5.70
  15   7  -2   15.80    5.50
  15   7  -2   14.10    6.60
  15   7  -2   13.30    6.30
 -15   7   2   21.90    7.20
 -15   7   2   30.50    7.90
 -13  -7   2  596.84   23.00
  13  -7  -2  673.23   29.60
  13  -7  -2  653.73   23.40
  13  -7  -2  653.23   25.40
 -13  -7   2  637.94   25.60
 -13  -7   2  638.64   24.80
  13  -7  -2  665.63   28.90
 -13  -7   2  632.04   24.40
  13   7  -2  627.94   25.10
 -13   7   2  644.84   28.80
  13   7  -2  602.34   23.20
 -13   7   2  665.03   28.90
  13   7  -2  632.74   24.70
 -13   7   2  617.54   23.00
 -13   7   2  666.13   23.10
  13   7  -2  613.24   27.20
 -11  -7   2 1319.97   40.50
  11  -7  -2 1332.47   44.50
  11  -7  -2 1297.47   40.80
 -11  -7   2 1282.47   39.10
  11  -7  -2 1349.07   43.30
 -11  -7   2 1317.27   41.20
 -11  -7   2 1300.87   38.40
  11  -7  -2 1304.97   38.40
  11   7  -2 1350.76   41.50
  11   7  -2 1350.76   39.90
  11   7  -2 1315.87   39.30
 -11   7   2 1361.76   39.10
 -11   7   2 1309.67   38.60
 -11   7   2 1304.57   39.50
 -11   7   2 1338.57   44.60
  11   7  -2 1279.47   42.90
 -11   7   2 1266.37   45.00
   9  -7  -2 2348.47   67.49
  -9  -7   2 2354.66   61.89
   9  -7  -2 2317.07   65.69
  -9  -7   2 2353.06   64.39
   9  -7  -2 2220.28   62.99
   9  -7  -2 2291.27   64.29
  -9  -7   2 2322.67   64.19
  -9  -7   2 2277.47   62.49
   9  -7  -2 2264.37   61.29
  -9   7   2 2282.77   61.49
  -9   7   2 2261.17   67.29
   9   7  -2 2351.26   64.99
  -9   7   2 2335.37   62.69
   9   7  -2 2309.17   62.39
  -9   7   2 2273.07   63.69
   9   7  -2 2294.77   66.19
   9   7  -2 2366.56   62.89
  -7  -7   2 1051.59   32.60
   7  -7  -2 1036.70   35.30
  -7  -7   2 1065.19   31.50
   7  -7  -2 1031.00   29.70
  -7  -7   2 1077.49   33.10
   7  -7  -2 1021.30   32.80
   7  -7  -2 1041.60   33.70
  -7  -7   2 1041.50   30.20
  -7   7   2 1024.50   29.80
   7   7  -2 1087.29   31.00
  -7   7   2 1020.00   37.20
  -7   7   2 1033.70   32.80
  -7   7   2 1058.19   31.70
   7   7  -2 1042.30   31.40
   7   7  -2 1069.69   34.20
   7   7  -2 1068.09   33.50
  -7   7   2 1023.80   34.70
  -5  -7   2  722.93   24.40
   5  -7  -2  673.23   23.70
   5  -7  -2  668.63   20.70
  -5  -7   2  724.23   21.70
   5  -7  -2  711.43   24.30
  -5  -7   2  716.73   22.90
  -5  -7   2  729.13   23.60
   5  -7  -2  681.63   25.50
  -5   7   2  663.43   27.60
   5   7  -2  760.22   25.10
   5   7  -2  731.03   23.70
   5   7  -2  723.33   24.60
  -5   7   2  708.43   23.50
  -5   7   2  670.23   24.60
  -5   7   2  653.93   24.10
   5   7  -2  737.23   21.80
   3  -7  -2    1.90    3.40
  -3  -7   2   -0.50    2.80
  -3  -7   2    4.30    2.40
   3  -7  -2    3.90    1.90
   3  -7  -2    1.20    3.10
  -3  -7   2    2.30    3.20
   3  -7  -2    1.30    2.80
  -3  -7   2    1.00    2.90
  -3  -7   2    4.70    2.20
  -3   7   2    0.20    2.70
  -3   7   2    0.80    2.70
   3   7  -2    1.60    2.60
   3   7  -2    3.80    2.90
   3   7  -2    3.00    2.70
   3   7  -2    4.00    2.00
  -3   7   2    4.20    3.00
  -3   7   2    4.10    3.80
  -3   7   2    1.10    2.90
   3   7  -2    3.40    2.20
   1  -7  -2  914.11   27.70
  -1  -7   2  866.61   28.10
   1  -7  -2  891.41   27.80
  -1  -7   2  860.01   26.50
   1  -7  -2  903.61   28.70
  -1  -7   2  859.01   27.00
  -1  -7   2  872.41   28.70
   1  -7  -2  895.01   25.00
   1   7  -2  878.11   27.30
   1   7  -2  842.22   28.30
  -1   7   2  934.31   27.40
   1   7  -2  882.41   29.30
  -1   7   2  897.11   28.80
   1   7  -2  849.81   26.40
  -1   7   2  929.31   31.90
  -1   7   2  904.21   29.60
  -1  -7  -2 1015.70   31.50
   1  -7   2 1050.69   32.90
   1  -7   2 1040.60   31.20
   1  -7   2 1061.29   33.00
  -1  -7  -2 1015.40   31.20
  -1  -7  -2 1037.90   32.10
   1  -7   2 1045.50   30.90
  -1  -7  -2 1021.80   29.10
   1   7   2  972.60   33.20
  -1   7  -2 1071.59   34.00
   1   7   2 1025.40   32.90
   1   7   2 1030.30   30.80
   1   7   2 1016.70   34.20
  -1   7  -2 1013.10   30.90
  -1   7  -2 1053.69   30.30
  -1   7  -2 1050.69   32.20
  -3  -7  -2 1537.35   44.70
   3  -7   2 1551.34   45.20
  -3  -7  -2 1568.44   42.70
   3  -7   2 1560.34   46.80
  -3  -7  -2 1584.74   44.80
  -3  -7  -2 1575.44   44.60
   3  -7   2 1596.44   46.60
   3  -7   2 1559.54   43.80
   3   7   2 1560.14   46.30
   3   7   2 1486.95   46.60
   3   7   2 1529.55   46.40
  -3   7  -2 1531.15   44.80
  -3   7  -2 1537.95   44.80
  -3   7  -2 1622.54   42.70
  -3   7  -2 1530.75   47.40
   3   7   2 1586.14   44.10
  -5  -7  -2   23.00    4.10
   5  -7   2   23.10    4.00
  -5  -7  -2   26.00    4.50
   5  -7   2   21.30    5.50
   5  -7   2   21.70    5.00
  -5  -7  -2   18.30    4.30
   5   7   2   19.30    4.30
   5   7   2   15.90    4.70
  -5   7  -2   23.10    4.10
  -5   7  -2   19.00    4.20
  -5   7  -2   21.50    5.00
   5   7   2   15.30    4.00
   5   7   2   16.70    4.80
   7  -7   2   15.60    3.80
   7  -7   2   15.90    6.00
  -7  -7  -2    9.30    4.00
   7  -7   2   16.30    5.00
  -7  -7  -2   12.80    4.00
  -7  -7  -2   13.50    4.20
   7   7   2   13.70    4.70
  -7   7  -2    8.20    4.20
   7   7   2   11.30    4.60
  -7   7  -2    8.70    3.60
   7   7   2   20.80    4.60
  -7   7  -2    6.20    4.70
   7   7   2   10.00    4.10
  -9  -7  -2  479.45   20.10
   9  -7   2  468.15   22.00
  -9  -7  -2  484.25   20.10
  -9  -7  -2  481.05   20.10
   9  -7   2  488.25   24.10
   9  -7   2  516.15   22.00
   9  -7   2  468.95   19.50
  -9   7  -2  492.15   19.90
  -9   7  -2  451.85   22.90
  -9   7  -2  464.05   18.30
   9   7   2  486.75   20.10
  -9   7  -2  459.65   22.20
   9   7   2  517.55   22.80
   9   7   2  511.55   20.40
   9   7   2  513.65   21.40
  11  -7   2 1033.80   36.80
  11  -7   2 1033.80   39.70
 -11  -7  -2 1034.30   35.00
  11  -7   2 1095.89   37.70
 -11  -7  -2  986.30   34.70
 -11  -7  -2 1060.89   35.30
  11  -7   2 1052.59   35.00
  11   7   2 1063.79   35.30
  11   7   2 1102.09   36.20
  11   7   2 1041.60   38.20
 -11   7  -2 1034.50   38.70
 -11   7  -2 1073.29   38.80
  11   7   2 1016.70   34.90
 -11   7  -2 1046.80   32.30
 -11   7  -2 1056.69   35.10
 -13  -7  -2  752.42   29.70
  13  -7   2  763.72   33.90
  13  -7   2  786.12   35.10
 -13  -7  -2  783.42   29.70
  13  -7   2  825.42   30.50
 -13  -7  -2  794.22   30.30
  13  -7   2  804.12   32.00
  13   7   2  800.32   33.50
 -13   7  -2  805.82   30.40
 -13   7  -2  800.92   33.90
  13   7   2  753.72   30.00
  13   7   2  774.22   30.40
 -13   7  -2  812.12   33.40
 -15  -7  -2  438.46   22.90
  15  -7   2  486.15   25.20
  15  -7   2  448.76   22.70
 -15  -7  -2  407.26   22.00
  15  -7   2  433.46   27.80
 -15  -7  -2  460.55   22.20
  15   7   2  426.86   25.40
  15   7   2  414.06   22.20
 -15   7  -2  434.16   22.70
 -15   7  -2  489.05   26.30
  15   7   2  428.46   23.60
 -15   7  -2  484.05   27.10
  17  -7   2   29.30    8.40
 -17  -7  -2   32.60    7.70
  17  -7   2   28.70    9.60
 -17  -7  -2   29.10    7.60
 -17  -7  -2   24.30    7.90
  17  -7   2   17.20   11.20
  17   7   2   17.70    8.30
 -17   7  -2   38.60   10.10
  17   7   2   32.80    8.00
  17   7   2   27.70    9.30
 -17   7  -2   33.50    8.20
 -17   7  -2   29.40    8.70
 -19  -7  -2   -8.60    6.30
  19  -7   2  -15.10    8.70
 -19  -7  -2   -2.70    6.60
  19  -7   2    1.40    6.80
  19  -7   2  -19.90    9.50
 -19  -7  -2   -1.70    6.80
 -19   7  -2    0.30    8.50
  19   7   2    0.00    7.10
 -19   7  -2   -3.40    6.60
 -19   7  -2   -4.10    7.10
  19   7   2   -8.50    7.20
  19   7   2   -4.60    7.30
 -21  -7  -2   59.39   10.90
 -21  -7  -2   62.09   10.90
 -21  -7  -2   58.19   10.50
  21  -7   2   74.69   13.50
  21  -7   2   76.59   15.10
  21  -7   2  110.29   17.20
 -21   7  -2   93.49   18.30
  21   7   2   64.99   11.80
 -21   7  -2   68.69   14.00
  21   7   2   61.69   12.30
 -21   7  -2   70.59   11.50
  21   7   2   71.09   11.40
 -23  -7  -2   42.20   10.20
 -23  -7  -2   37.40   10.50
 -23  -7  -2   41.60   10.70
  23  -7   2   49.99   15.00
  23  -7   2   49.50   13.20
  23   7   2   39.20   12.10
 -23   7  -2   43.70   12.60
 -23   7  -2   41.30   16.80
  23   7   2   40.50   11.90
  23   7   2   38.20   10.70
 -23   7  -2   45.00   10.80
  24  -8  -2   -2.70   11.80
 -24  -8   2   -8.30    7.90
 -24  -8   2   -9.30    6.80
  24   8  -2   -7.80    9.00
 -24   8   2   10.80   10.00
 -24   8   2    3.10    8.80
  24   8  -2  -12.90    8.70
  22  -8  -2   15.70   14.40
 -22  -8   2    5.10    7.80
 -22  -8   2    4.10    7.20
  22  -8  -2   17.50   12.20
 -22  -8   2   17.00    8.40
 -22   8   2   27.30    9.60
  22   8  -2    6.80    7.50
  22   8  -2    7.90    9.00
 -22   8   2   20.90    9.70
  22   8  -2   -0.20    8.50
  20  -8  -2   55.99   14.00
 -20  -8   2   55.49    8.80
 -20  -8   2   89.19   15.10
  20  -8  -2   68.79   14.00
 -20  -8   2   57.79    9.50
  20  -8  -2   68.49   10.70
  20   8  -2   52.49    8.70
 -20   8   2   44.70   10.50
  20   8  -2   50.99   10.20
  20   8  -2   39.70   10.80
 -20   8   2   62.09   12.50
 -18  -8   2   -5.90    6.20
 -18  -8   2   -0.20    6.40
  18  -8  -2    4.10    6.80
  18  -8  -2    2.20   10.30
  18  -8  -2    9.30   10.10
 -18  -8   2   -0.10    5.40
 -18   8   2   -7.10    7.90
  18   8  -2   -8.80    7.30
 -18   8   2   -9.50    7.20
  18   8  -2    1.40    6.20
  18   8  -2   -5.80    7.00
 -16  -8   2  -12.30    5.60
  16  -8  -2   -6.50    8.80
  16  -8  -2    8.40    6.50
  16  -8  -2   -3.70    8.80
 -16  -8   2    3.50    5.10
  16   8  -2   -1.60    5.50
 -16   8   2   -6.90    6.70
 -16   8   2   -9.70    6.40
  16   8  -2   -2.30    5.70
  16   8  -2   -9.60    6.20
 -14  -8   2  218.28   13.90
  14  -8  -2  231.58   21.00
 -14  -8   2  192.38   15.80
  14  -8  -2  239.38   21.40
  14   8  -2  216.58   14.20
  14   8  -2  208.88   15.20
  14   8  -2  167.18   15.10
 -14   8   2  216.58   19.10
  14   8  -2  175.18   17.40
 -14   8   2  207.98   13.80
 -14   8   2  223.18   20.00
 -12  -8   2  521.95   23.50
  12  -8  -2  560.24   27.60
  12  -8  -2  587.94   23.90
  12  -8  -2  570.74   26.20
  12  -8  -2  640.04   23.60
 -12  -8   2  558.74   21.70
 -12  -8   2  512.65   23.00
  12   8  -2  544.95   22.50
 -12   8   2  576.64   26.80
 -12   8   2  556.64   27.70
 -12   8   2  585.74   22.20
  12   8  -2  552.24   21.80
  12   8  -2  518.85   23.80
  12   8  -2  510.75   25.30
  10  -8  -2 1154.68   34.10
  10  -8  -2 1165.38   37.60
 -10  -8   2 1117.99   35.30
 -10  -8   2 1115.89   37.10
  10  -8  -2 1151.58   38.70
  10  -8  -2 1147.19   40.50
 -10  -8   2 1120.69   36.70
  10   8  -2 1061.69   38.90
 -10   8   2 1187.48   36.60
  10   8  -2 1119.99   38.00
  10   8  -2 1108.19   35.00
 -10   8   2 1187.38   40.60
 -10   8   2 1124.19   41.80
 -10   8   2 1148.79   34.70
 -10   8   2 1227.78   37.10
  10   8  -2 1129.19   35.50
   8  -8  -2 1183.28   38.50
   8  -8  -2 1193.38   41.20
  -8  -8   2 1212.88   36.80
  -8  -8   2 1211.88   37.80
   8  -8  -2 1209.68   39.50
   8  -8  -2 1180.58   37.40
  -8  -8   2 1213.18   36.90
  -8  -8   2 1263.57   38.80
   8  -8  -2 1233.78   35.10
  -8   8   2 1205.78   43.30
   8   8  -2 1259.07   36.40
   8   8  -2 1218.58   39.50
   8   8  -2 1213.18   37.30
  -8   8   2 1283.07   37.10
   8   8  -2 1198.28   40.00
  -8   8   2 1220.18   38.30
  -8   8   2 1251.97   40.90
  -8   8   2 1229.58   35.20
  -6  -8   2 1151.08   32.50
  -6  -8   2 1159.18   34.50
   6  -8  -2 1099.09   32.00
   6  -8  -2 1082.89   35.70
  -6  -8   2 1158.88   35.00
   6  -8  -2 1100.99   38.00
   6  -8  -2 1070.89   35.80
  -6  -8   2 1165.08   36.10
   6   8  -2 1124.19   35.40
   6   8  -2 1143.89   36.80
  -6   8   2 1178.18   34.90
  -6   8   2 1102.09   35.90
   6   8  -2 1170.78   36.90
   6   8  -2 1160.88   33.20
  -6   8   2 1130.69   36.90
  -6   8   2 1107.79   40.30
   4  -8  -2   99.49    9.70
  -4  -8   2  129.29    7.50
  -4  -8   2  115.99    7.80
  -4  -8   2  122.89    9.10
  -4  -8   2  118.99   10.00
   4  -8  -2   99.19   10.70
   4  -8  -2   88.49    9.40
  -4  -8   2  129.99    9.10
  -4   8   2  107.69    9.60
  -4   8   2  111.49    9.10
   4   8  -2  115.39    9.50
  -4   8   2  107.09    9.10
  -4   8   2  108.19   11.90
   4   8  -2  131.29    7.80
   4   8  -2  127.79    9.60
   4   8  -2  119.19    7.10
   4   8  -2  130.39   10.10
   2  -8  -2   67.59    7.60
  -2  -8   2   57.39    8.30
  -2  -8   2   67.19    6.10
  -2  -8   2   60.49    7.00
   2  -8  -2   64.09    8.20
  -2  -8   2   59.89    7.80
   2  -8  -2   60.79    8.50
   2  -8  -2   73.19    5.60
   2   8  -2   75.09    7.30
  -2   8   2   68.09    8.20
  -2   8   2   80.09    7.50
  -2   8   2   80.09    8.00
  -2   8   2   77.99   10.00
   2   8  -2   76.29    8.30
   2   8  -2   65.29    7.70
   2   8  -2   74.89    6.10
   0  -8   2   79.79    7.00
   0  -8  -2   62.99    7.90
   0  -8   2   75.59    7.30
   0  -8  -2   64.29    7.50
   0  -8  -2   63.49    5.80
   0  -8   2   73.39    8.90
   0  -8   2   68.99    8.80
   0  -8  -2   75.19    8.30
   0   8   2   68.19    8.00
   0   8  -2   69.59    6.70
   0   8  -2   81.49    7.10
   0   8   2   72.29    7.50
   0   8   2   69.29    8.40
   0   8  -2   77.99    8.80
   0   8  -2   80.19    8.10
   0   8   2   64.29    9.50
  -2  -8  -2  322.97   15.00
  -2  -8  -2  330.27   13.00
  -2  -8  -2  324.47   15.30
  -2  -8  -2  339.77   14.90
   2  -8   2  334.37   16.90
   2  -8   2  336.57   16.50
   2  -8   2  345.47   14.20
   2  -8   2  347.57   15.00
   2   8   2  322.97   17.20
   2   8   2  326.07   16.10
   2   8   2  328.67   14.30
  -2   8  -2  330.27   14.90
   2   8   2  328.77   16.90
  -2   8  -2  365.86   16.00
  -2   8  -2  359.86   14.00
  -2   8  -2  367.06   18.00
   4  -8   2  262.37   15.70
   4  -8   2  282.17   15.40
  -4  -8  -2  229.48   11.80
  -4  -8  -2  239.88   13.50
  -4  -8  -2  263.87   13.50
   4  -8   2  284.47   12.90
  -4  -8  -2  254.37   13.50
  -4   8  -2  273.27   16.60
   4   8   2  226.68   14.90
  -4   8  -2  261.07   14.00
   4   8   2  232.68   14.30
  -4   8  -2  265.77   14.00
   4   8   2  238.98   14.50
   4   8   2  257.97   13.00
  -4   8  -2  273.07   11.60
  -6  -8  -2   26.00    5.20
   6  -8   2   16.30    6.40
   6  -8   2   15.30    5.40
  -6  -8  -2   14.70    4.80
  -6  -8  -2   10.10    5.20
   6  -8   2   17.10    4.10
   6   8   2   16.20    5.50
  -6   8  -2   12.10    4.80
   6   8   2   26.20    6.10
   6   8   2   24.30    4.90
  -6   8  -2    7.50    4.30
  -6   8  -2   13.70    5.80
   8  -8   2  271.87   17.70
  -8  -8  -2  240.18   15.50
  -8  -8  -2  252.17   14.70
  -8  -8  -2  259.07   15.20
   8  -8   2  274.97   14.60
   8  -8   2  274.67   19.10
  -8   8  -2  240.88   18.40
   8   8   2  265.47   15.30
  -8   8  -2  241.78   17.00
  -8   8  -2  247.18   14.20
   8   8   2  270.77   17.80
   8   8   2  278.77   17.10
   8   8   2  265.27   15.30
  10  -8   2  642.94   25.00
 -10  -8  -2  606.94   25.30
 -10  -8  -2  625.54   24.60
  10  -8   2  643.74   30.30
 -10  -8  -2  612.74   25.20
  10  -8   2  645.24   27.80
 -10   8  -2  652.53   23.60
 -10   8  -2  609.14   28.90
  10   8   2  637.54   27.00
  10   8   2  610.24   25.30
 -10   8  -2  616.34   28.00
 -10   8  -2  627.64   24.80
  10   8   2  618.34   28.60
  10   8   2  596.04   25.40
  12  -8   2  647.24   32.40
  12  -8   2  713.33   30.40
 -12  -8  -2  676.13   26.70
 -12  -8  -2  621.34   26.50
 -12  -8  -2  647.04   26.30
  12  -8   2  650.63   26.50
  12   8   2  615.84   26.50
  12   8   2  631.84   30.10
 -12   8  -2  660.23   30.30
 -12   8  -2  675.23   31.00
  12   8   2  637.64   28.00
 -12   8  -2  704.03   24.80
  12   8   2  646.84   27.10
 -12   8  -2  638.64   26.40
  14  -8   2  480.45   29.40
 -14  -8  -2  480.75   23.40
 -14  -8  -2  504.85   23.50
  14  -8   2  551.24   24.40
  14  -8   2  532.05   26.80
 -14  -8  -2  479.95   23.20
  14   8   2  445.26   26.60
 -14   8  -2  537.55   28.10
 -14   8  -2  531.15   24.10
  14   8   2  468.55   24.00
  14   8   2  486.15   23.50
 -14   8  -2  540.15   28.30
  16  -8   2   66.29   11.10
  16  -8   2   53.79   13.00
 -16  -8  -2   53.79    8.80
 -16  -8  -2   43.80    9.10
 -16  -8  -2   51.19    8.90
 -16   8  -2   83.89   16.70
  16   8   2   50.09    9.20
 -16   8  -2   85.09   13.30
  16   8   2   42.60   10.00
  16   8   2   51.59    9.50
 -16   8  -2   62.89   11.00
 -18  -8  -2   35.30    8.50
  18  -8   2   30.60   10.60
  18  -8   2   52.99    9.70
  18  -8   2   21.80   12.50
 -18  -8  -2   22.60    8.50
 -18  -8  -2   34.20    8.70
  18   8   2   41.10    9.60
  18   8   2   37.70   10.30
  18   8   2   42.50    9.30
 -18   8  -2   37.80   10.50
 -18   8  -2   41.90    9.10
 -18   8  -2   39.60    9.50
 -20  -8  -2   -5.90    6.90
  20  -8   2   -7.60   11.20
 -20  -8  -2   -4.10    7.10
  20  -8   2   -8.90    9.50
  20  -8   2    5.50    8.00
  20   8   2   -6.90    8.20
  20   8   2    2.20    7.60
 -20   8  -2   -0.50    9.20
  20   8   2   -6.20    8.40
 -20   8  -2    5.40    8.10
 -20   8  -2    2.50    7.70
 -22  -8  -2   -3.70    7.80
 -22  -8  -2  -14.90    8.10
  22  -8   2    1.70   11.20
  22  -8   2    7.30    8.90
  22  -8   2    4.90   12.90
 -22  -8  -2    1.60    7.80
  22   8   2    9.00    9.20
 -22   8  -2   15.90    9.20
  22   8   2   11.90   10.20
 -22   8  -2    6.90    9.80
 -22   8  -2   10.50   11.20
  22   8   2   -7.80    9.60
  23  -9  -2   47.60   14.50
 -23  -9   2   25.20    9.60
 -23  -9   2   29.50   10.00
  23   9  -2    8.60   10.40
 -23   9   2   33.20   11.00
 -23   9   2   31.00   12.10
  23   9  -2   29.10   12.40
 -21  -9   2    3.00    7.70
 -21  -9   2    8.60    7.70
  21  -9  -2   16.40   12.10
  21   9  -2    3.30    9.00
  21   9  -2    4.80    9.50
 -21   9   2   19.50   10.00
  21   9  -2   -7.90   11.10
 -21   9   2   16.30    9.20
 -19  -9   2   85.59   13.40
  19  -9  -2  108.59   16.30
 -19  -9   2   95.69   15.70
  19  -9  -2   73.99   14.20
 -19  -9   2   69.79   10.60
  19   9  -2   90.39   14.30
 -19   9   2   58.29   11.80
  19   9  -2   65.09   12.10
  19   9  -2   69.39   11.20
 -19   9   2   98.69   18.70
 -17  -9   2  100.89   15.40
  17  -9  -2   87.89   14.50
 -17  -9   2  127.39   13.40
  17  -9  -2   93.39   14.80
 -17  -9   2  135.09   15.60
  17   9  -2  145.99   14.20
 -17   9   2  118.19   19.50
 -17   9   2  118.29   19.30
  17   9  -2  102.39   15.40
  17   9  -2   74.49   12.60
  15  -9  -2   63.49   11.70
 -15  -9   2   47.00    9.10
  15  -9  -2   73.19   12.70
 -15  -9   2   63.19    9.60
  15   9  -2   47.80    8.40
  15   9  -2   84.69   13.70
 -15   9   2   48.70   10.50
  15   9  -2   52.39   10.20
 -15   9   2   59.29   11.80
  13  -9  -2   57.49    8.90
 -13  -9   2   27.90    7.60
  13  -9  -2   52.69    9.60
  13  -9  -2   61.19   11.90
 -13  -9   2   66.19   10.30
 -13  -9   2   44.70    8.30
 -13   9   2   37.10   10.10
  13   9  -2   68.49   11.70
 -13   9   2   41.30    7.20
  13   9  -2   47.90    7.10
 -13   9   2   28.60    8.60
  13   9  -2   45.90    9.20
  13   9  -2   34.80    7.30
  11  -9  -2   23.00    6.60
 -11  -9   2    4.00    5.20
 -11  -9   2   13.40    4.90
  11  -9  -2   20.50    8.20
  11  -9  -2   11.00    6.60
 -11  -9   2    8.00    5.60
 -11   9   2   10.30    5.30
  11   9  -2   10.50    5.50
 -11   9   2   -0.50    6.00
  11   9  -2   12.30    6.30
  11   9  -2    8.40    5.10
 -11   9   2    1.70    5.90
   9  -9  -2  275.27   19.40
  -9  -9   2  281.37   14.60
   9  -9  -2  260.87   16.50
  -9  -9   2  254.87   15.20
  -9  -9   2  260.77   16.00
   9  -9  -2  249.88   16.90
  -9   9   2  289.97   15.70
  -9   9   2  288.27   19.80
  -9   9   2  276.77   17.50
   9   9  -2  275.67   14.70
   9   9  -2  246.28   17.00
   9   9  -2  262.27   16.80
   7  -9  -2   28.80    7.80
  -7  -9   2   33.40    5.80
   7  -9  -2   27.60    6.60
  -7  -9   2   32.50    6.10
  -7  -9   2   30.00    5.70
   7  -9  -2   31.70    6.50
   7   9  -2   31.80    6.30
   7   9  -2   24.60    5.40
  -7   9   2   51.89    8.40
   7   9  -2   32.90    6.50
  -7   9   2   51.49    9.90
  -7   9   2   36.10    5.90
   7   9  -2   26.60    5.30
  -5  -9   2  451.75   18.20
  -5  -9   2  493.95   19.90
  -5  -9   2  479.35   19.50
  -5  -9   2  466.85   20.60
   5  -9  -2  479.15   20.40
   5  -9  -2  467.55   20.80
   5  -9  -2  470.75   22.80
   5   9  -2  469.85   20.90
  -5   9   2  521.75   21.30
  -5   9   2  498.45   24.60
  -5   9   2  495.75   20.60
   5   9  -2  469.55   21.30
   5   9  -2  478.85   18.00
   5   9  -2  483.15   21.20
  -5   9   2  517.85   20.00
   3  -9  -2   15.10    4.80
  -3  -9   2   20.40    5.20
  -3  -9   2   20.20    3.60
  -3  -9   2   22.70    5.50
  -3  -9   2   22.00    4.30
   3  -9  -2   18.00    5.50
  -3  -9   2   22.40    4.80
   3  -9  -2   23.10    3.70
   3  -9  -2   16.20    5.80
   3   9  -2   18.70    5.20
  -3   9   2   21.70    5.00
   3   9  -2   20.30    5.30
  -3   9   2   25.50    6.20
   3   9  -2   24.30    4.10
  -3   9   2   26.40    5.30
   3   9  -2   25.90    4.80
  -3   9   2   29.60    5.20
   3   9  -2   22.70    5.00
  -1  -9   2  429.06   19.40
  -1  -9   2  418.46   17.20
   1  -9  -2  437.76   18.30
   1  -9  -2  440.66   15.50
   1  -9  -2  432.16   19.60
   1  -9  -2  434.46   19.20
  -1  -9   2  412.86   18.90
  -1  -9   2  420.66   16.60
   1   9  -2  425.16   19.40
  -1   9   2  491.25   18.40
   1   9  -2  415.56   16.40
   1   9  -2  429.46   20.50
   1   9  -2  410.36   17.70
  -1   9   2  443.86   19.90
  -1   9   2  446.36   22.10
  -1   9   2  468.55   19.70
  -1  -9  -2  217.88   10.70
  -1  -9  -2  231.88   13.90
   1  -9   2  209.08   14.00
  -1  -9  -2  197.48   13.40
   1  -9   2  198.08   11.60
   1  -9   2  189.18   11.50
  -1  -9  -2  202.78   12.60
   1  -9   2  199.18   13.70
   1   9   2  220.28   12.60
  -1   9  -2  192.98   13.00
   1   9   2  237.78   14.60
   1   9   2  214.28   15.20
  -1   9  -2  186.18   11.50
  -1   9  -2  201.28   14.80
   1   9   2  250.47   14.30
  -1   9  -2  208.38   11.90
  -3  -9  -2   97.79   10.80
   3  -9   2   93.49    9.20
  -3  -9  -2   99.89    8.80
  -3  -9  -2  116.69   10.50
   3  -9   2   89.79   11.60
  -3  -9  -2  100.19   10.80
   3  -9   2   86.59   12.00
  -3   9  -2   78.69    8.60
   3   9   2  111.59   10.10
  -3   9  -2   80.79   12.10
   3   9   2  121.19   12.00
   3   9   2  114.49   11.30
   3   9   2  129.09   12.10
  -3   9  -2   73.19    9.60
  -3   9  -2   85.79   10.40
   5  -9   2   23.50    6.60
   5  -9   2   24.00    5.10
  -5  -9  -2   30.70    6.30
  -5  -9  -2   20.10    5.20
  -5  -9  -2   20.50    6.30
   5  -9   2   14.80    7.10
   5   9   2   35.20    6.50
  -5   9  -2   19.40    5.60
  -5   9  -2   21.40    5.20
  -5   9  -2   19.20    6.60
  -7  -9  -2   36.30    7.00
   7  -9   2   34.90    9.30
   7  -9   2   36.40    6.10
  -7  -9  -2   41.70    7.80
   7  -9   2   36.70    8.40
  -7  -9  -2   34.50    6.30
   7   9   2   43.30    7.80
  -7   9  -2   30.80    7.70
   7   9   2   46.90    6.90
   7   9   2   42.00    7.70
  -7   9  -2   36.90    7.40
  -7   9  -2   31.80    6.10
  -9  -9  -2  146.69   14.20
  -9  -9  -2  140.39   14.00
  -9  -9  -2  142.99   13.00
   9  -9   2  165.28   12.90
   9  -9   2  146.99   19.20
   9  -9   2  144.99   17.50
   9   9   2  129.99   15.60
  -9   9  -2  171.98   13.30
  -9   9  -2  160.18   17.40
  -9   9  -2  160.58   13.20
  -9   9  -2  155.38   15.40
   9   9   2  121.79   13.80
   9   9   2  142.09   14.00
   9   9   2  125.49   15.60
  11  -9   2  158.48   20.10
 -11  -9  -2  157.68   14.60
  11  -9   2  161.98   13.80
 -11  -9  -2  141.59   14.20
 -11  -9  -2  149.69   13.20
  11  -9   2  145.09   17.70
  11   9   2  121.99   16.60
 -11   9  -2  154.88   18.00
 -11   9  -2  145.99   16.70
  11   9   2  135.29   14.40
  11   9   2  140.99   14.50
 -11   9  -2  165.58   12.50
  11   9   2  119.79   15.90
 -11   9  -2  169.18   13.80
  13  -9   2   20.90    6.10
 -13  -9  -2   10.90    5.80
 -13  -9  -2   16.00    6.50
  13  -9   2    5.50    8.10
  13  -9   2    1.40    9.30
 -13  -9  -2   18.30    6.40
 -13   9  -2   18.90    6.00
 -13   9  -2    4.50    6.80
  13   9   2   14.20    6.90
  13   9   2   16.00    6.60
  13   9   2    8.20    7.60
 -13   9  -2    7.80    7.40
 -15  -9  -2   82.99   13.60
 -15  -9  -2   54.09    9.10
  15  -9   2   91.59   13.40
  15  -9   2   68.99   11.40
  15  -9   2   55.19   12.80
 -15  -9  -2   49.70    8.80
  15   9   2   57.19    9.60
  15   9   2   51.19   11.00
  15   9   2   41.60    9.20
 -15   9  -2   58.29   11.00
 -15   9  -2   54.79   10.90
 -15   9  -2   75.49   13.30
 -17  -9  -2   -3.00    6.90
  17  -9   2   11.70    9.10
  17  -9   2    9.20    6.60
 -17  -9  -2   -7.30    6.80
 -17  -9  -2    1.10    7.00
  17  -9   2   -5.00   10.80
 -17   9  -2    3.60    7.70
  17   9   2   -6.50    8.50
 -17   9  -2    6.10    7.00
 -17   9  -2    1.90    8.20
  17   9   2    1.20    7.30
  17   9   2   -4.60    7.50
  19  -9   2   52.79   12.30
  19  -9   2   27.50   13.60
 -19  -9  -2   37.30   10.80
 -19  -9  -2   39.90    9.50
  19  -9   2   52.69   13.40
 -19  -9  -2   29.50    9.70
  19   9   2   40.20    9.60
  19   9   2   28.00   11.10
  19   9   2   28.70   10.30
 -19   9  -2   48.50   10.90
 -19   9  -2   44.70   12.10
 -21  -9  -2  -11.10    8.30
 -21  -9  -2   -6.30    7.60
  21  -9   2   -2.40   12.30
 -21  -9  -2  -18.50    8.50
  21  -9   2  -14.90    9.90
  21   9   2    0.00    9.80
  21   9   2   -2.00    8.60
  21   9   2  -10.80    9.40
 -21   9  -2    7.90    9.50
 -21   9  -2    8.10    9.90
 -22 -10   2  331.47   24.20
  22 -10  -2  352.96   35.80
 -22 -10   2  310.67   24.50
 -22  10   2  359.36   29.90
  22  10  -2  270.47   28.40
 -22  10   2  339.07   30.20
  22  10  -2  301.07   25.70
  20 -10  -2  271.27   26.80
 -20 -10   2  189.88   20.70
 -20 -10   2  221.78   20.70
 -20  10   2  263.07   26.10
  20  10  -2  211.28   24.20
 -20  10   2  232.78   25.30
  20  10  -2  204.78   21.00
 -18 -10   2  378.36   24.00
  18 -10  -2  418.76   24.60
 -18 -10   2  375.46   23.90
  18 -10  -2  434.16   30.50
 -18  10   2  402.66   28.30
 -18  10   2  393.36   29.00
  18  10  -2  361.26   23.00
  18  10  -2  381.36   26.80
  18  10  -2  382.76   23.60
  16 -10  -2  228.58   18.90
  16 -10  -2  192.98   23.10
 -16 -10   2  190.78   17.50
 -16 -10   2  208.18   17.40
 -16 -10   2  201.28   15.40
  16  10  -2  208.98   15.70
 -16  10   2  224.98   22.70
 -16  10   2  224.88   21.40
  16  10  -2  194.28   19.80
  16  10  -2  220.98   17.60
  14 -10  -2   -2.70    6.80
 -14 -10   2    0.80    5.90
  14 -10  -2   -0.90    9.30
 -14 -10   2   10.20    5.50
 -14 -10   2    2.50    6.30
 -14  10   2    0.90    6.80
  14  10  -2    1.60    5.80
 -14  10   2    1.50    5.10
  14  10  -2   -2.40    6.00
  14  10  -2    0.20    6.70
 -14  10   2    6.30    7.50
  14  10  -2    1.50    5.90
  12 -10  -2   12.80    8.70
 -12 -10   2   10.80    6.00
 -12 -10   2    6.90    6.30
  12 -10  -2    9.00    6.90
  12 -10  -2   11.90    7.00
 -12 -10   2    9.90    5.50
 -12  10   2   10.90    5.60
 -12  10   2    8.80    6.60
  12  10  -2   15.90    6.90
  12  10  -2   17.70    6.30
  12  10  -2   16.00    6.00
 -12  10   2    4.50    7.20
  10 -10  -2  178.18   15.60
 -10 -10   2  179.98   13.10
 -10 -10   2  173.38   14.50
  10 -10  -2  155.68   15.10
  10 -10  -2  175.88   18.30
 -10 -10   2  162.78   15.30
  10  10  -2  193.28   15.60
  10  10  -2  200.28   16.30
 -10  10   2  161.68   16.00
 -10  10   2  153.08   18.30
  10  10  -2  194.18   13.20
 -10  10   2  161.08   14.30
   8 -10  -2    8.10    5.40
   8 -10  -2   10.20    5.80
   8 -10  -2    5.40    6.80
  -8 -10   2   12.60    6.10
  -8 -10   2   17.70    5.60
  -8 -10   2   12.60    5.60
   8  10  -2    5.70    4.90
  -8  10   2   14.20    8.40
  -8  10   2    8.80    5.20
   8  10  -2   20.20    6.40
   8  10  -2   22.60    6.30
  -8  10   2    5.60    6.40
   6 -10  -2  164.98   13.00
  -6 -10   2  138.69   13.90
   6 -10  -2  142.29   15.60
  -6 -10   2  148.19   12.40
  -6 -10   2  148.79   12.70
   6 -10  -2  158.68   14.10
   6  10  -2  103.89   11.70
  -6  10   2  112.29   12.80
   6  10  -2  162.48   14.50
  -6  10   2  147.59   12.20
   6  10  -2  156.98   13.90
  -6  10   2  115.39   16.10
   6  10  -2  141.09   14.50
  -4 -10   2  269.57   16.30
   4 -10  -2  300.67   15.90
   4 -10  -2  293.57   18.40
  -4 -10   2  238.48   14.10
   4 -10  -2  305.87   17.40
  -4 -10   2  254.67   16.90
  -4 -10   2  250.57   15.00
   4  10  -2  235.18   17.30
   4  10  -2  248.18   13.80
   4  10  -2  232.18   16.90
  -4  10   2  292.97   20.10
  -4  10   2  306.07   17.30
  -4  10   2  300.67   16.30
   4  10  -2  242.48   15.90
   2 -10  -2  561.44   22.80
   2 -10  -2  501.95   20.80
  -2 -10   2  451.35   22.10
  -2 -10   2  443.66   21.30
   2 -10  -2  516.55   23.30
  -2 -10   2  429.66   19.60
   2  10  -2  453.65   21.10
  -2  10   2  546.15   22.20
   2  10  -2  429.66   23.10
  -2  10   2  527.25   23.00
  -2  10   2  527.85   21.40
   2  10  -2  415.36   22.10
  -2  10   2  526.05   26.00
   0 -10   2 1147.89   39.00
   0 -10   2 1143.79   39.10
   0 -10   2 1130.89   36.00
   0 -10  -2 1137.19   37.00
   0 -10  -2 1156.78   38.40
   0 -10  -2 1135.99   39.00
   0  10   2 1206.58   39.20
   0  10   2 1212.58   37.10
   0  10  -2 1175.78   37.20
   0  10  -2 1140.69   39.00
   0  10  -2 1121.89   40.90
   0  10   2 1173.88   42.20
   0  10   2 1140.99   39.70
  -2 -10  -2 1300.37   37.90
  -2 -10  -2 1262.97   40.10
  -2 -10  -2 1250.87   41.30
   2 -10   2 1248.08   42.40
  -2 -10  -2 1229.58   41.40
   2 -10   2 1242.58   42.80
   2 -10   2 1237.08   38.50
   2  10   2 1342.37   39.60
   2  10   2 1329.57   42.90
  -2  10  -2 1199.88   39.30
  -2  10  -2 1221.18   44.30
   2  10   2 1290.27   43.30
  -2  10  -2 1314.77   39.30
  -2  10  -2 1230.08   41.40
   2  10   2 1313.47   44.60
   4 -10   2  524.55   25.70
   4 -10   2  523.35   25.00
  -4 -10  -2  525.25   22.60
  -4 -10  -2  509.65   20.70
  -4 -10  -2  496.05   23.80
  -4 -10  -2  474.25   23.50
   4 -10   2  532.45   21.30
  -4  10  -2  547.85   23.00
   4  10   2  563.54   22.20
   4  10   2  564.34   25.10
  -4  10  -2  561.64   26.70
   4  10   2  567.74   25.50
  -4  10  -2  531.65   22.60
   6 -10   2  272.57   20.70
  -6 -10  -2  267.87   17.00
   6 -10   2  258.57   19.20
  -6 -10  -2  241.18   17.40
  -6 -10  -2  231.98   17.30
   6 -10   2  301.57   15.70
  -6 -10  -2  270.47   15.10
  -6  10  -2  296.17   17.60
   6  10   2  288.87   19.10
   6  10   2  296.97   19.10
  -6  10  -2  303.07   16.80
   6  10   2  277.27   16.60
  -6  10  -2  285.27   20.20
  -8 -10  -2    7.40    6.10
  -8 -10  -2   -2.90    5.60
   8 -10   2    7.00    8.60
  -8 -10  -2   17.00    5.20
   8 -10   2    4.30    7.60
   8 -10   2   16.20    5.10
   8  10   2    1.50    5.90
   8  10   2    7.20    6.10
  -8  10  -2    9.30    5.50
  -8  10  -2   14.80    5.60
   8  10   2   13.30    6.70
  -8  10  -2    7.80    6.50
 -10 -10  -2   -6.00    5.00
  10 -10   2  -13.40    6.90
  10 -10   2    0.20    4.20
 -10 -10  -2   -6.40    5.10
  10 -10   2   -4.30    8.50
 -10 -10  -2   -4.00    4.50
  10  10   2   -7.30    5.40
  10  10   2   -3.90    6.10
 -10  10  -2   -2.40    6.10
  10  10   2   -6.00    5.50
 -10  10  -2   -3.50    5.30
 -10  10  -2   -1.60    4.30
  10  10   2   -5.70    5.70
 -10  10  -2    1.10    4.40
  12 -10   2  197.48   22.10
  12 -10   2  191.28   19.60
  12 -10   2  197.78   15.40
 -12 -10  -2  204.68   16.60
 -12 -10  -2  188.58   16.20
 -12 -10  -2  225.18   15.90
 -12  10  -2  187.48   16.10
 -12  10  -2  182.68   17.40
  12  10   2  192.38   19.10
 -12  10  -2  171.48   18.40
  12  10   2  195.88   16.00
  12  10   2  221.48   16.50
  12  10   2  200.88   18.40
 -12  10  -2  189.18   19.70
 -14 -10  -2    6.70    6.00
 -14 -10  -2    2.80    7.10
  14 -10   2    5.60    7.90
  14 -10   2   13.00    8.80
  14 -10   2    1.30   10.30
 -14 -10  -2   15.20    7.50
  14  10   2    4.70    7.40
  14  10   2   -0.50    7.30
  14  10   2    2.60    7.80
 -14  10  -2    7.40    8.20
 -14  10  -2    0.50    7.40
 -16 -10  -2    3.90    7.90
  16 -10   2   22.00   10.00
  16 -10   2    7.20   11.30
 -16 -10  -2    0.70    7.20
 -16 -10  -2   -0.90    7.20
 -16  10  -2    4.30    8.90
 -16  10  -2    9.60    9.00
  16  10   2    8.50    8.00
  16  10   2    6.80    9.10
  16  10   2    4.10    8.20
 -18 -10  -2   45.80    9.80
 -18 -10  -2   37.50   10.70
 -18 -10  -2   26.90    9.90
  18 -10   2   54.79   14.20
  18 -10   2   62.89   12.20
  18  10   2   38.90   10.80
 -18  10  -2   47.30   11.90
  18  10   2   37.80   12.10
  18  10   2   52.99   10.50
 -18  10  -2   53.99   12.10
 -20 -10  -2   19.70    9.30
  20 -10   2   38.00   12.10
 -20 -10  -2   11.50   10.70
  20 -10   2   30.20   14.50
 -20 -10  -2   10.90    9.40
 -20  10  -2   16.60   10.90
 -20  10  -2   27.30   11.80
  20  10   2   22.10   10.90
  20  10   2   23.70   12.40
  20  10   2   22.60   10.20
 -21 -11   2  232.48   22.00
 -21 -11   2  230.98   22.90
  21  11  -2  213.28   23.00
 -21  11   2  276.27   28.40
 -21  11   2  287.57   37.20
 -19 -11   2  372.56   25.10
  19 -11  -2  442.06   32.60
 -19 -11   2  360.76   25.80
 -19  11   2  437.36   32.00
  19  11  -2  400.36   25.70
  19  11  -2  389.76   29.90
 -19  11   2  425.96   31.00
  17 -11  -2  298.17   21.80
 -17 -11   2  209.68   21.30
  17 -11  -2  254.17   26.80
 -17 -11   2  203.78   20.20
  17  11  -2  264.17   20.70
  17  11  -2  254.07   23.90
 -17  11   2  273.07   26.30
 -17  11   2  285.67   25.10
  15 -11  -2    4.90   10.50
  15 -11  -2    5.30    8.00
 -15 -11   2   -5.40    7.40
 -15 -11   2    2.60    6.50
 -15 -11   2   -4.70    6.70
 -15  11   2   10.80    7.60
  15  11  -2    1.80    6.60
 -15  11   2   13.20    8.80
  15  11  -2    6.90    8.70
  15  11  -2    8.60    7.10
 -13 -11   2   -4.80    5.40
 -13 -11   2   -3.10    6.50
 -13 -11   2    1.10    5.30
  13 -11  -2  -13.00    8.40
  13 -11  -2   -2.10    7.00
  13  11  -2   -1.70    6.50
 -13  11   2    5.50    8.30
  13  11  -2   -1.10    5.50
  13  11  -2   -5.20    5.30
 -13  11   2    2.40    4.60
 -13  11   2    6.10    7.00
  11 -11  -2  133.19   18.40
  11 -11  -2  135.29   16.10
 -11 -11   2  107.69   15.00
 -11 -11   2  131.19   13.30
 -11 -11   2  128.99   14.00
  11  11  -2  125.09   15.40
  11  11  -2  135.79   15.00
 -11  11   2  153.08   14.10
  11  11  -2  135.49   13.10
 -11  11   2  152.68   18.30
   9 -11  -2  272.07   18.40
  -9 -11   2  235.18   16.20
  -9 -11   2  230.48   18.00
   9 -11  -2  247.08   20.30
  -9 -11   2  241.88   16.20
   9  11  -2  249.38   15.20
  -9  11   2  252.67   21.20
   9  11  -2  224.08   17.90
  -9  11   2  259.57   17.30
   9  11  -2  258.27   18.50
   7 -11  -2   74.49   11.90
  -7 -11   2   83.29   11.40
  -7 -11   2   66.79    9.30
  -7 -11   2   73.39   13.50
  -7 -11   2   84.89   11.80
   7 -11  -2   65.59   10.60
   7 -11  -2   56.79    8.80
   7  11  -2   83.09   13.30
   7  11  -2   52.19    7.70
   7  11  -2   79.29   12.50
  -5 -11   2   13.80    5.70
  -5 -11   2    9.10    6.20
   5 -11  -2   19.80    6.30
   5 -11  -2   18.50    7.10
   5 -11  -2   22.40    5.80
  -5 -11   2   12.90    6.60
   5  11  -2    6.00    6.00
  -5  11   2    8.00    7.40
   5  11  -2    7.00    7.70
  -5  11   2    7.70    5.90
   5  11  -2    5.10    5.90
  -5  11   2   11.70    5.70
  -3 -11   2  258.27   18.50
   3 -11  -2  342.07   19.90
  -3 -11   2  239.78   15.50
  -3 -11   2  264.17   17.80
   3  11  -2  232.68   17.40
  -3  11   2  296.37   21.90
   3  11  -2  226.68   18.40
  -3  11   2  335.97   19.60
   3  11  -2  218.58   18.90
  -3  11   2  324.67   18.20
  -1 -11   2  894.01   31.70
  -1 -11   2  912.11   35.10
   1 -11  -2 1004.90   35.00
  -1 -11   2  954.20   35.30
   1 -11  -2  947.81   32.90
   1 -11  -2  999.10   35.80
   1  11  -2  891.11   35.20
  -1  11   2  994.50   35.00
  -1  11   2  988.80   39.00
  -1  11   2  961.60   33.20
  -1  11   2  941.21   35.70
   1  11  -2  914.01   33.50
   1  11  -2  915.61   37.30
  -1 -11  -2 1253.17   42.50
  -1 -11  -2 1237.88   40.80
   1 -11   2 1247.48   43.60
   1 -11   2 1225.38   43.70
   1 -11   2 1241.68   39.50
  -1 -11  -2 1267.47   43.10
   1  11   2 1270.07   40.60
   1  11   2 1319.47   43.60
  -1  11  -2 1230.08   42.50
   1  11   2 1287.17   46.20
  -1  11  -2 1246.48   45.70
  -1  11  -2 1312.87   40.70
   1  11   2 1285.27   44.20
  -3 -11  -2  828.32   31.00
   3 -11   2  866.01   34.00
   3 -11   2  884.71   34.90
   3 -11   2  864.91   29.70
  -3 -11  -2  810.52   32.60
  -3 -11  -2  816.02   32.80
  -3  11  -2  863.01   32.10
   3  11   2  848.52   33.50
   3  11   2  807.02   33.70
  -3  11  -2  845.62   35.60
   3  11   2  846.82   30.20
  -5 -11  -2  408.86   22.50
   5 -11   2  478.55   19.90
   5 -11   2  460.95   25.10
  -5 -11  -2  417.16   21.20
  -5 -11  -2  373.16   22.00
   5 -11   2  471.15   24.30
   5  11   2  444.66   20.60
   5  11   2  408.76   23.70
  -5  11  -2  452.25   22.00
   5  11   2  423.46   23.50
  -5  11  -2  433.56   25.20
  -7 -11  -2   56.69    8.60
  -7 -11  -2   62.49    9.50
  -7 -11  -2   56.39    9.70
   7 -11   2   82.19   11.90
  -7 -11  -2   50.89    9.20
   7 -11   2   94.49   15.30
   7  11   2   57.09    8.50
  -7  11  -2   84.99   12.40
  -7  11  -2   80.59   15.00
   7  11   2   59.59   10.10
   7  11   2   55.69    9.30
  -9 -11  -2    8.80    7.10
  -9 -11  -2    5.90    5.30
  -9 -11  -2    1.00    6.30
  -9 -11  -2   -3.50    6.30
   9 -11   2    5.20    8.50
   9 -11   2   -2.00    7.20
   9  11   2    6.30    7.40
  -9  11  -2    8.60    6.50
  -9  11  -2    9.00    6.20
  -9  11  -2    9.90    5.20
   9  11   2   -8.60    6.00
   9  11   2    7.30    6.60
  11 -11   2   84.79   14.00
 -11 -11  -2   66.59    9.80
 -11 -11  -2   93.99   12.40
  11 -11   2   68.79   11.80
 -11 -11  -2   58.59   10.00
  11  11   2   54.39    9.30
 -11  11  -2  109.49   16.90
  11  11   2  105.99   16.10
  11  11   2   82.59   15.60
 -11  11  -2   97.49   15.30
 -13 -11  -2   43.50    9.40
  13 -11   2   76.29   12.60
  13 -11   2   75.59   14.00
 -13 -11  -2   75.89   13.30
 -13 -11  -2   55.59   10.10
 -13  11  -2   97.99   18.20
  13  11   2   64.39   12.00
  13  11   2   43.40    9.90
  13  11   2   52.99    9.80
 -13  11  -2   89.39   16.70
  15 -11   2   32.60   10.40
 -15 -11  -2   11.00    8.90
  15 -11   2   31.10   12.20
 -15 -11  -2    1.40    7.40
 -15 -11  -2    2.60    7.50
  15  11   2   24.50    8.70
 -15  11  -2   17.00    9.90
  15  11   2   15.20    9.50
  15  11   2    4.80    8.20
 -15  11  -2   27.40    9.70
 -17 -11  -2  -13.00    7.70
  17 -11   2    6.20   12.30
  17 -11   2    1.20    9.80
 -17 -11  -2   -6.60    7.30
 -17  11  -2   -9.80    9.00
  17  11   2   -1.50    8.00
 -17  11  -2   -5.80    9.10
  17  11   2  -13.10    8.20
  17  11   2   -9.10    9.30
  19 -11   2   85.29   13.80
 -19 -11  -2   58.99   11.40
 -19 -11  -2   50.49   11.50
  19 -11   2   72.29   24.90
  19  11   2   51.49   19.10
  19  11   2   53.79   12.50
  19  11   2   60.29   12.00
 -19  11  -2   43.90   15.60
 -19  11  -2   51.29   13.60
 -18 -12   2   57.19   11.80
 -18 -12   2   48.20   10.70
  18 -12  -2   63.99   16.20
  18  12  -2   52.59   11.40
  18  12  -2   40.50   12.20
 -18  12   2   61.39   13.90
 -16 -12   2    5.50    9.80
  16 -12  -2   41.00   13.80
 -16 -12   2   12.30    9.20
  16  12  -2   13.10   10.60
 -16  12   2   25.80   11.50
  16  12  -2   19.50    9.20
 -14 -12   2   -7.20    8.10
  14 -12  -2    1.60   10.70
 -14 -12   2  -11.20    7.00
  14 -12  -2   11.50    8.80
  14  12  -2    3.70    8.00
  14  12  -2    1.60    7.20
  14  12  -2   -8.00    8.60
 -14  12   2    2.70    9.30
 -14  12   2   -3.20    6.50
 -12 -12   2   -4.60    7.10
 -12 -12   2   -0.70    6.00
  12 -12  -2    4.50    7.40
  12 -12  -2   -1.90    9.20
 -12 -12   2   -5.50    6.10
 -12  12   2   -1.00    7.80
  12  12  -2   -7.60    6.30
  12  12  -2   -8.30    9.30
  12  12  -2   -8.80    7.20
 -12  12   2   -2.30    5.60
  10 -12  -2   19.70    7.80
 -10 -12   2   10.40    7.30
 -10 -12   2   11.30    6.10
 -10 -12   2   11.30    6.20
  10 -12  -2   29.60   10.00
 -10  12   2   12.90    6.20
  10  12  -2    6.30    7.40
 -10  12   2   16.00    7.70
  10  12  -2    9.40    6.70
   8 -12  -2   -2.30    7.50
  -8 -12   2    6.60    5.70
  -8 -12   2   -6.30    6.20
   8 -12  -2    3.50    6.70
  -8 -12   2   -3.00    5.60
  -8  12   2   -3.80    6.40
  -8  12   2   -3.90    5.20
   8  12  -2   -3.90    6.20
   8  12  -2   -0.80    5.90
  -6 -12   2    4.50    6.80
   6 -12  -2    6.20    7.60
   6 -12  -2   -3.30    6.30
  -6 -12   2    1.70    5.20
  -6 -12   2    3.20    6.00
   6  12  -2   -3.20    5.80
   6  12  -2    0.90    5.70
  -6  12   2   -8.40    6.30
  -6  12   2   -0.60    5.70
   4 -12  -2  160.98   17.00
  -4 -12   2  129.09   15.70
  -4 -12   2  118.09   12.40
  -4 -12   2  145.99   14.70
   4 -12  -2  163.38   16.40
   4  12  -2   91.09   14.40
  -4  12   2  115.39   18.00
  -4  12   2  127.59   14.00
   4  12  -2  103.59   13.90
  -4  12   2  113.99   15.30
  -2 -12   2   22.50    7.80
   2 -12  -2   24.90    6.30
  -2 -12   2   22.60    7.50
  -2 -12   2   19.30    5.80
   2 -12  -2   28.10    7.70
   2 -12  -2   24.80    8.10
  -2  12   2   18.80    7.00
   2  12  -2    8.40    6.70
  -2  12   2   14.70    7.70
  -2  12   2   18.70    6.70
   2  12  -2   17.70    6.40
   2  12  -2   10.50    7.10
   0 -12  -2  239.68   16.30
   0 -12   2  225.28   18.40
   0 -12   2  222.08   15.20
   0 -12  -2  238.08   18.80
   0 -12  -2  253.17   18.60
   0 -12   2  238.38   19.10
   0  12   2  255.57   20.60
   0  12   2  253.17   18.00
   0  12   2  275.97   19.50
   0  12  -2  216.58   19.40
   0  12  -2  233.18   17.70
   0  12  -2  245.78   16.30
   0  12   2  254.77   16.60
  -2 -12  -2  284.27   19.60
  -2 -12  -2  270.47   19.30
   2 -12   2  277.27   20.40
   2 -12   2  266.97   20.30
  -2 -12  -2  239.98   17.20
  -2  12  -2  268.97   21.30
   2  12   2  261.67   19.10
   2  12   2  270.97   17.20
  -2  12  -2  275.17   18.80
   2  12   2  263.87   19.80
   4 -12   2  299.97   21.30
   4 -12   2  286.87   21.10
  -4 -12  -2  256.27   17.70
  -4 -12  -2  275.07   19.90
  -4 -12  -2  263.07   18.90
   4  12   2  287.17   17.00
  -4  12  -2  271.67   21.80
   4  12   2  243.18   19.80
   4  12   2  248.08   20.10
  -4  12  -2  281.17   19.30
   6 -12   2  118.19   17.50
  -6 -12  -2   72.59   10.70
  -6 -12  -2  110.99   14.30
   6 -12   2  110.49   17.80
  -6 -12  -2   97.09   14.90
   6  12   2   94.29   16.30
  -6  12  -2  110.59   17.40
  -6  12  -2   98.09   14.40
   6  12   2  119.69   14.00
   6  12   2   87.59   16.20
  -8 -12  -2    9.10    7.40
   8 -12   2   20.40   10.00
  -8 -12  -2    9.20    7.30
  -8 -12  -2    1.00    7.50
   8 -12   2   13.90    9.00
  -8  12  -2    9.80    6.00
   8  12   2    7.50    7.20
   8  12   2   10.70    8.30
  -8  12  -2   10.70    7.50
   8  12   2    8.50    7.60
 -10 -12  -2  -10.20    7.30
  10 -12   2    9.10   10.40
 -10 -12  -2    1.30    8.00
  10 -12   2    6.70    9.00
 -10 -12  -2   -0.40    7.00
  10  12   2   -7.20    7.10
  10  12   2   -7.60    7.00
 -10  12  -2    5.50    5.70
  10  12   2   -0.80    7.90
 -10  12  -2   -0.80    7.70
  12 -12   2   22.40   11.50
  12 -12   2   10.70    9.70
 -12 -12  -2    5.10    7.40
 -12 -12  -2    4.00    8.30
 -12  12  -2   11.00    8.30
  12  12   2   -1.10    8.60
  12  12   2    3.10    8.40
  12  12   2   -7.50    8.00
 -12  12  -2    2.10    9.00
  14 -12   2    5.60   11.70
 -14 -12  -2   -6.00    7.20
 -14 -12  -2  -12.90    8.50
  14 -12   2    4.20    9.70
 -14  12  -2   -5.10    8.30
  14  12   2  -15.40    8.00
 -14  12  -2    3.00    8.50
  14  12   2    2.60    9.50
 -16 -12  -2   -4.00    8.10
 -16 -12  -2  -10.80    9.00
  16 -12   2   16.00   12.80
  16 -12   2   24.10   10.60
 -16  12  -2  -15.00    8.80
  16  12   2   17.90    9.20
  16  12   2   -0.90   10.50
  16  12   2   -8.40    9.00
 -16  12  -2   -1.20    9.40
 -17 -13   2   -9.70   10.40
 -17 -13   2   -9.70    7.70
 -15 -13   2    6.90    9.90
  15 -13  -2   29.50   11.10
 -15 -13   2    9.20    8.50
  15 -13  -2   24.30   13.70
  15  13  -2   -7.80   10.80
  15  13  -2    1.10   10.40
 -15  13   2   25.00   11.60
  13 -13  -2   35.40   13.70
 -13 -13   2   -2.30    7.70
 -13 -13   2   -0.90    9.00
  13 -13  -2   10.90    9.90
  13  13  -2   -3.50    9.70
  13  13  -2   10.60    9.30
 -13  13   2    9.90   10.90
 -13  13   2   10.20    7.50
  11 -13  -2   72.39   11.70
  11 -13  -2   74.39   13.90
 -11 -13   2   63.09   11.90
 -11 -13   2   62.29   10.00
  11  13  -2   52.79   11.40
  11  13  -2   60.59   11.90
 -11  13   2   45.30   11.80
 -11  13   2   56.09    9.90
  -9 -13   2  131.99   17.80
  -9 -13   2  139.79   15.00
   9 -13  -2  167.18   20.20
   9 -13  -2  159.98   18.50
  -9 -13   2  141.39   16.00
   9  13  -2  114.69   17.80
   9  13  -2  129.49   18.10
  -9  13   2  129.89   17.30
  -9  13   2  124.09   21.10
   7 -13  -2   52.19   10.00
   7 -13  -2   57.79   11.70
  -7 -13   2   54.79   10.40
  -7 -13   2   83.29   13.90
  -7  13   2   43.10   10.60
  -7  13   2   40.10    8.60
   7  13  -2   48.30    9.50
   7  13  -2   42.20    9.40
   5 -13  -2   39.40   10.40
   5 -13  -2   47.80    9.80
  -5 -13   2   59.89    9.50
  -5 -13   2   52.99    9.70
   5  13  -2   50.09    9.30
  -5  13   2   52.89   11.20
  -5  13   2   42.10    8.90
   5  13  -2   37.50    8.90
  -3 -13   2  159.38   16.10
   3 -13  -2  132.69   18.50
  -3 -13   2  171.58   17.80
   3 -13  -2  135.69   18.10
  -3  13   2  161.58   19.40
  -3  13   2  158.98   15.60
   3  13  -2  147.69   16.60
   3  13  -2  163.48   15.60
  -3  13   2  161.88   17.10
  -1 -13   2   94.89   15.00
   1 -13  -2   92.29   12.00
   1 -13  -2   82.49   11.90
  -1 -13   2  121.39   16.50
  -1  13   2   97.09   15.30
  -1  13   2   88.49   16.60
   1  13  -2   88.99   14.80
  -1  13   2  106.29   14.40
   1  13  -2  102.99   13.40
   1  13  -2   86.09   15.60
  -1 -13  -2   29.70    8.70
   1 -13   2   23.40    8.80
  -1 -13  -2   30.40    9.00
   1 -13   2   20.10    8.60
   1  13   2   25.60    7.90
  -1  13  -2   24.30    8.20
   1  13   2   25.40    9.90
   1  13   2   25.00    8.10
  -1  13  -2   26.20    7.80
  -3 -13  -2   -6.50    7.00
  -3 -13  -2    3.30    7.30
  -3 -13  -2   -0.40    6.30
   3 -13   2   -5.50    7.70
   3 -13   2   -4.20    7.70
  -3  13  -2   -1.20    6.00
  -3  13  -2    2.80    7.10
   3  13   2   -1.30    6.30
   3  13   2    4.20    7.00
   3  13   2    3.90    6.10
   5 -13   2    0.50    9.00
  -5 -13  -2   -1.10    7.40
   5 -13   2   -6.40    8.70
  -5 -13  -2    3.40    6.60
  -5 -13  -2    3.20    7.20
  -5  13  -2   -3.20    6.10
   5  13   2    3.20    7.00
   5  13   2   -5.00    7.10
   5  13   2   12.20    6.50
  -5  13  -2   -5.60    6.70
   7 -13   2    6.60   10.70
  -7 -13  -2    6.50    8.70
  -7 -13  -2   10.00    7.40
  -7 -13  -2   11.40    8.10
   7 -13   2    5.70    9.50
   7  13   2   13.70    8.60
   7  13   2   15.80    7.70
  -7  13  -2    5.30    6.90
   7  13   2   -0.20    8.20
  -7  13  -2    2.30    8.70
  -9 -13  -2  138.29   18.40
   9 -13   2  129.39   21.00
   9 -13   2   97.59   15.50
  -9 -13  -2  133.49   18.80
  -9 -13  -2  153.78   17.70
   9  13   2  118.19   20.40
   9  13   2  134.59   17.70
  -9  13  -2  108.39   21.40
   9  13   2  120.09   20.20
  -9  13  -2  125.29   16.60
 -11 -13  -2   43.90   11.00
 -11 -13  -2   35.60   10.30
  11 -13   2   53.89   12.00
  11 -13   2   31.40   13.00
 -11 -13  -2   49.10   10.50
  11  13   2   45.00   10.90
  11  13   2   31.30   11.10
 -11  13  -2   15.70   10.80
 -11  13  -2   29.60    8.40
  11  13   2   44.20   12.10
 -13 -13  -2   56.39   11.90
 -13 -13  -2   60.19   11.50
  13 -13   2   75.79   13.50
 -13 -13  -2   53.79   11.20
  13 -13   2   85.79   16.20
  13  13   2   66.99   13.90
  13  13   2   72.29   11.70
 -13  13  -2   56.39   13.00
  15 -13   2   52.79   12.80
 -15 -13  -2   45.40   10.90
  15 -13   2   54.99   15.40
  15  13   2   43.60   11.10
  14 -14  -2   10.20   13.70
 -14 -14   2    9.10   12.50
  14 -14  -2    5.00   10.80
  14  14  -2    5.20    9.20
  14  14  -2    4.10   10.90
 -14  14   2   15.20   12.50
 -12 -14   2   27.80   11.00
  12 -14  -2   34.30   11.40
  12 -14  -2   43.40   14.10
 -12  14   2   49.90    9.80
  12  14  -2   32.80   11.20
  12  14  -2   20.10   10.10
 -12  14   2   37.30   12.40
  10 -14  -2  350.16   26.10
  10 -14  -2  334.37   27.70
 -10 -14   2  349.67   26.30
  10  14  -2  325.27   25.30
  10  14  -2  319.07   25.80
 -10  14   2  346.27   30.20
 -10  14   2  348.17   24.10
  -8 -14   2  189.58   21.80
   8 -14  -2  177.88   22.60
   8 -14  -2  182.88   21.20
  -8  14   2  181.18   19.80
  -8  14   2  171.38   23.60
   8  14  -2  193.28   19.90
   8  14  -2  175.98   20.70
   6 -14  -2   60.49   12.60
   6 -14  -2   50.09   10.80
  -6 -14   2   59.69   10.70
  -6 -14   2   68.69   11.50
   6  14  -2   86.79   16.00
  -6  14   2   46.00   10.30
   6  14  -2   49.99   10.80
  -6  14   2   44.50   11.10
  -4 -14   2  191.68   20.00
  -4 -14   2  176.98   18.60
   4 -14  -2  154.58   19.40
   4 -14  -2  157.88   20.60
   4  14  -2  165.48   19.00
  -4  14   2  171.78   20.80
  -4  14   2  163.18   18.30
   4  14  -2  187.98   17.80
   2 -14  -2   70.29   12.10
  -2 -14   2   70.79   12.00
   2 -14  -2   64.99   11.40
  -2 -14   2   75.69   11.90
   2  14  -2   97.09   16.10
  -2  14   2  102.99   17.70
   2  14  -2   80.89   15.50
  -2  14   2   84.49   15.00
  -2  14   2  105.19   16.00
   0 -14  -2  187.88   19.80
   0 -14   2  131.39   20.40
   0 -14  -2  206.08   20.80
   0 -14   2  142.59   19.20
   0  14  -2  156.68   19.70
   0  14   2  204.98   19.20
   0  14  -2  164.88   18.10
   0  14   2  193.18   18.10
   2 -14   2  324.67   25.00
  -2 -14  -2  307.67   23.30
  -2 -14  -2  300.67   23.40
   2 -14   2  294.87   24.80
  -2  14  -2  323.57   22.50
   2  14   2  314.27   22.40
  -2  14  -2  319.77   25.40
   2  14   2  333.77   24.00
   4 -14   2   44.70   11.80
  -4 -14  -2   44.70   11.00
   4 -14   2   39.60   11.70
  -4 -14  -2   46.80   10.70
   4  14   2   49.40   10.20
   4  14   2   38.90   10.10
  -4  14  -2   43.70   11.10
  -4  14  -2   48.40    9.80
  -6 -14  -2   -2.20    8.30
   6 -14   2   -7.50    9.80
  -6 -14  -2   -5.00    7.70
   6 -14   2   -3.60    9.90
   6  14   2   -6.90    8.00
  -6  14  -2   -3.70    7.10
  -6  14  -2  -11.40    7.70
   6  14   2   -4.90    7.80
   8 -14   2   26.70   12.50
   8 -14   2   36.20   12.10
  -8 -14  -2   31.80   10.70
  -8 -14  -2   43.90   10.30
  -8  14  -2   10.30   10.40
   8  14   2   32.40   13.40
   8  14   2   28.00   11.10
   8  14   2   26.60   11.10
  -8  14  -2   13.20    8.70
 -10 -14  -2  225.88   21.90
 -10 -14  -2  198.58   26.50
  10 -14   2  189.28   25.50
 -10 -14  -2  203.08   22.30
  10 -14   2  218.28   24.30
  10  14   2  242.78   21.60
 -10  14  -2  196.38   19.50
  10  14   2  209.48   24.60
  10  14   2  197.38   24.40
 -10  14  -2  183.18   24.80
  12 -14   2  185.28   23.50
 -12 -14  -2  167.28   21.40
  12 -14   2  165.38   25.70
 -12 -14  -2  171.88   20.20
  12  14   2  155.68   23.50
  12  14   2  112.39   21.90
 -12  14  -2  165.18   29.70
  12  14   2  192.88   20.80
  11 -15  -2   41.40   17.80
  11 -15  -2   31.90   11.60
  11  15  -2   34.00   10.60
 -11  15   2   39.30    9.60
 -11  15   2   41.00   13.20
  11  15  -2   33.30   10.70
   9 -15  -2   61.89   12.80
  -9 -15   2   48.00   12.90
   9 -15  -2   56.09   14.20
   9  15  -2   54.19   11.60
   9  15  -2   47.10   11.30
  -9  15   2   56.29   13.00
   7 -15  -2   75.79   13.20
  -7 -15   2   73.89   13.50
   7 -15  -2   93.49   15.60
  -7  15   2   63.89   13.60
   7  15  -2  112.29   18.60
  -7  15   2  126.69   19.20
   7  15  -2   66.89   12.10
  -5 -15   2    7.40   10.10
   5 -15  -2    9.60   10.90
   5 -15  -2    8.70    9.60
   5  15  -2    6.40    8.50
  -5  15   2    2.50    8.50
   5  15  -2   13.50    8.60
  -5  15   2    2.70    9.70
   3 -15  -2    7.20   10.00
  -3 -15   2   -8.40    9.70
  -3 -15   2   -1.70   10.20
   3 -15  -2    0.80    9.10
  -3  15   2   -0.60    8.10
  -3  15   2   -3.70   12.70
   3  15  -2   -2.70    7.50
   1 -15  -2  129.69   20.00
  -1 -15   2   84.59   14.30
   1 -15  -2   81.19   13.20
  -1 -15   2   80.49   13.70
   1  15  -2   60.39   11.20
  -1  15   2  122.59   19.20
  -1 -15  -2   60.79   11.80
   1 -15   2   30.90   11.70
   1 -15   2   51.09   12.40
  -1 -15  -2   59.89   11.90
   1  15   2   53.79   10.80
   1  15   2   57.29   11.20
  -1  15  -2   42.30   11.00
  -1  15  -2   52.29   11.10
   3 -15   2  207.98   23.20
   3 -15   2  239.38   25.30
  -3 -15  -2  209.98   22.60
  -3 -15  -2  223.38   22.20
  -3  15  -2  184.98   22.90
  -3  15  -2  197.08   20.50
   3  15   2  205.28   22.70
   3  15   2  216.08   21.30
  -5 -15  -2   -4.40    8.30
   5 -15   2   -0.50    9.80
  -5 -15  -2   -7.00    8.80
   5 -15   2   -9.80    9.50
  -5  15  -2   -8.70    8.00
  -5  15  -2   -4.10    7.20
   5  15   2   -3.80    8.50
   5  15   2  -10.10    8.40
   7 -15   2   -8.20   10.10
  -7 -15  -2   -6.20    8.80
   7 -15   2    0.60   11.10
  -7 -15  -2   -4.90    8.30
  -7  15  -2   -8.00    7.90
   7  15   2   -6.00    8.30
   7  15   2   -8.10    9.10
  -7  15  -2   -2.00    6.90
  -9 -15  -2   49.80   11.30
   9 -15   2   54.19   14.70
   9 -15   2   52.19   13.40
  -9  15  -2   54.69   14.80
  -9  15  -2   59.29   10.40
   9  15   2   38.60   11.70
   9  15   2   56.99   15.70
   6 -16  -2   11.20   15.10
   6 -16  -2    3.00   10.10
   6  16  -2    1.90    9.20
  -6  16   2   -9.70    9.20
   4 -16  -2   21.90   12.10
   4 -16  -2   10.50   10.50
   2 -16  -2   24.40   11.20
   2 -16  -2   14.00   11.10
   0 -16  -2    5.50    9.80
   0 -16   2    9.50   17.30
   0 -16   2    1.00   15.00
   0 -16  -2   -4.20    9.50
  -2 -16  -2    0.20   10.90
  -2 -16  -2    0.20    9.30
   2 -16   2    3.10    9.50
   2  16   2  -15.90    8.20
  -2  16  -2   -9.40   10.90
   4 -16   2   16.80   11.00
  -4 -16  -2    7.20    9.40
  -4  16  -2    8.00    9.00
   4  16   2  -12.70    8.00
 -28   0   3   20.10   10.60
  28   0  -3   25.70   10.70
 -28   0   3   19.90   10.20
  28   0  -3    7.00   12.20
  26   0  -3   -7.80   10.10
 -26   0   3   -1.10    8.40
 -26   0   3    9.00    8.10
  26   0  -3    2.20    8.90
  24   0  -3   37.30    9.50
 -24   0   3   44.20   10.60
  24   0  -3   42.60   12.50
  24   0  -3   52.39   10.80
 -22   0   3    2.10    5.10
 -22   0   3    0.90    6.20
 -22   0   3   -3.40    7.40
  22   0  -3    3.50    6.50
  22   0  -3   -2.30    6.70
  22   0  -3  -10.60    7.70
  20   0  -3   -6.50    8.10
  20   0  -3    0.10    7.40
  20   0  -3    9.90    6.90
 -20   0   3    5.40    4.80
 -20   0   3    4.50    6.40
  20   0  -3    7.70    5.80
 -20   0   3    6.30    7.30
 -18   0   3    2.90    3.60
  18   0  -3   -1.70    5.20
  18   0  -3  -10.20    6.40
 -18   0   3   -1.50    5.30
 -18   0   3    1.80    4.70
  18   0  -3    0.70    4.60
  18   0  -3  -10.10    6.20
 -18   0   3    1.60    3.70
 -16   0   3   23.50    6.20
 -16   0   3   24.40    5.50
  16   0  -3   24.80    6.50
  16   0  -3   16.50    4.50
  16   0  -3   21.20    5.50
 -16   0   3   20.30    4.20
  16   0  -3   18.30    6.60
 -14   0   3    0.70    2.80
  14   0  -3    2.50    5.00
 -14   0   3   -3.50    2.60
 -14   0   3    1.40    4.10
  14   0  -3   -4.30    2.90
 -14   0   3    1.10    3.40
  14   0  -3    2.70    3.70
  14   0  -3    1.30    4.60
  12   0  -3    1.70    3.90
  12   0  -3    2.30    3.80
 -12   0   3   -3.30    3.00
  12   0  -3    0.70    2.30
 -12   0   3    0.30    2.40
  12   0  -3    1.10    2.80
 -12   0   3   -0.20    2.00
 -12   0   3   -2.60    2.50
  10   0  -3    4.40    3.10
 -10   0   3    0.70    1.50
 -10   0   3   -1.00    2.10
 -10   0   3    0.50    1.90
 -10   0   3    2.40    1.40
  10   0  -3    1.20    2.20
 -10   0   3   -2.30    2.60
  10   0  -3    2.40    1.40
  10   0  -3    1.10    1.70
  10   0  -3    3.30    3.20
  -8   0   3    0.50    1.10
  -8   0   3    0.60    1.50
  -8   0   3    0.10    1.10
  -8   0   3   -1.00    1.90
  -8   0   3    2.40    1.80
   8   0  -3    3.70    2.80
   8   0  -3    2.40    1.80
   8   0  -3    0.00    1.10
   8   0  -3    2.90    2.40
   8   0  -3    0.50    1.20
   6   0  -3    3.30    1.70
  -6   0   3    0.80    1.40
   6   0  -3    3.30    2.70
   6   0  -3    0.40    2.00
  -6   0   3   -0.10    1.10
  -6   0   3    0.20    1.20
  -6   0   3   -0.30    1.70
   6   0  -3    0.40    1.10
  -4   0   3   -4.40    1.20
  -4   0   3   -3.70    1.20
   4   0  -3   -3.70    1.80
   4   0  -3   -5.60    1.50
   4   0  -3   -3.20    1.20
  -4   0   3   -0.90    1.50
  -4   0   3   -4.10    1.30
  -2   0   3   -3.80    1.40
   2   0  -3   -4.80    1.30
   2   0  -3   -4.10    1.10
  -2   0   3   -5.60    1.10
  -2   0   3   -5.60    1.00
   2   0  -3   -5.50    1.00
  -2   0   3   -6.50    1.00
  -2   0   3   -5.10    0.90
   0   0   3    3.90    1.20
   0   0   3    3.30    1.30
   0   0  -3    2.70    1.00
   0   0   3    2.90    1.10
   0   0   3    4.50    1.20
   0   0  -3    4.80    1.40
   0   0   3    3.90    0.90
   0   0  -3    3.60    1.00
   0   0   3    3.70    1.00
   0   0   3    2.20    1.00
   0   0   3    3.50    1.20
   2   0   3    0.70    1.20
   2   0   3   -0.20    1.20
  -2   0  -3    0.70    1.00
  -2   0  -3   -0.50    1.10
  -2   0  -3    0.00    1.30
   2   0   3    0.20    1.20
   2   0   3    1.10    1.30
   2   0   3    2.70    1.60
   2   0   3   -0.60    1.20
  -2   0  -3    0.30    1.40
   2   0   3   -0.20    1.50
   2   0   3    0.90    1.10
   4   0   3    0.30    1.00
  -4   0  -3    1.30    1.50
   4   0   3    3.30    1.80
  -4   0  -3    0.10    0.90
   4   0   3    1.00    1.50
  -4   0  -3    1.20    1.80
   4   0   3    0.70    1.80
   4   0   3    3.80    1.60
  -4   0  -3    2.90    1.40
   4   0   3    2.30    1.40
   4   0   3    2.10    1.60
   4   0   3    5.30    1.60
   6   0   3   10.50    2.70
   6   0   3    8.60    2.50
   6   0   3   17.70    3.40
  -6   0  -3   11.50    2.80
   6   0   3   10.20    2.40
   6   0   3    9.00    2.50
  -6   0  -3   11.30    2.70
  -8   0  -3   53.79    6.50
  -8   0  -3   79.19    7.80
   8   0   3   65.29    7.60
   8   0   3   64.49    6.50
   8   0   3   55.59    7.00
  -8   0  -3   67.29    7.40
   8   0   3   53.09    6.70
  -8   0  -3   80.29    5.90
   8   0   3   71.79    5.70
  10   0   3   19.90    3.40
 -10   0  -3   15.90    4.20
  10   0   3   11.80    4.20
  10   0   3   12.20    3.80
 -10   0  -3   13.50    4.10
  10   0   3   11.50    3.60
  10   0   3    8.50    4.00
 -10   0  -3   13.90    2.90
 -10   0  -3    9.30    3.50
  12   0   3   11.10    4.90
 -12   0  -3   13.80    4.20
  12   0   3   10.00    4.40
 -12   0  -3   15.70    4.90
  12   0   3   18.00    3.90
  12   0   3    9.20    4.90
 -12   0  -3   16.80    4.90
 -12   0  -3   17.00    3.60
  12   0   3    9.80    4.60
 -14   0  -3    1.40    3.90
  14   0   3    2.10    4.80
 -14   0  -3    0.80    4.70
 -14   0  -3    3.20    3.40
  14   0   3   -5.30    3.50
 -14   0  -3    0.90    4.90
  16   0   3   10.20    6.40
  16   0   3   15.50    6.60
 -16   0  -3   17.40    5.70
 -16   0  -3   10.60    6.60
 -16   0  -3    6.40    6.10
  16   0   3   15.30    6.40
 -18   0  -3   13.80    7.50
  18   0   3   12.20    7.30
  18   0   3   13.30    7.60
  18   0   3   16.10    7.50
 -18   0  -3   13.40    6.50
 -18   0  -3   24.20    7.60
  20   0   3   31.20    9.10
 -20   0  -3   25.70    8.90
 -20   0  -3   18.40    8.90
 -20   0  -3   25.00    7.80
  20   0   3   19.90    8.10
  20   0   3   19.80    9.20
  22   0   3   22.50    9.80
  22   0   3    0.70    8.30
 -22   0  -3   17.40    8.10
 -22   0  -3   11.40    9.20
  22   0   3    9.20    9.30
 -22   0  -3    2.90    9.30
 -24   0  -3   -7.90    9.30
  24   0   3   -2.50    9.10
 -24   0  -3    5.30    8.10
 -24   0  -3    1.40    9.70
  24   0   3    5.30   10.30
  24   0   3   -0.90   10.10
  26   0   3    5.90   10.80
  26   0   3   -4.00   11.70
 -26   0  -3   -0.30    9.20
 -26   0  -3   -5.60   10.20
 -29  -1   3    4.50    9.90
  29  -1  -3   14.60   11.60
  29   1  -3    0.80   10.40
 -29   1   3   -2.80    9.30
  27  -1  -3    2.90   11.40
 -27  -1   3   19.20    9.90
  27  -1  -3   13.80   10.30
 -27  -1   3   14.50    8.80
  27   1  -3   14.30    9.50
 -27   1   3    1.50    8.00
 -27   1   3   11.20   10.50
  27   1  -3   -6.20   10.40
 -25  -1   3  212.68   22.10
 -25  -1   3  202.18   19.50
  25  -1  -3  198.18   20.50
 -25  -1   3  165.98   16.90
  25  -1  -3  144.39   22.80
  25   1  -3  194.08   18.80
 -25   1   3  184.08   19.20
 -25   1   3  169.08   23.00
  25   1  -3  211.58   19.60
  25   1  -3  169.08   21.80
  23  -1  -3  182.18   20.40
 -23  -1   3  221.48   21.70
  23  -1  -3  214.58   18.00
 -23  -1   3  230.78   19.30
  23  -1  -3  162.38   22.80
 -23  -1   3  193.88   15.40
  23   1  -3  203.88   17.60
  23   1  -3  245.08   19.10
 -23   1   3  202.48   22.70
 -23   1   3  205.68   15.70
 -23   1   3  202.78   18.60
  23   1  -3  183.68   21.10
  21  -1  -3    6.40    7.80
 -21  -1   3   15.60    5.30
  21  -1  -3    2.20    9.00
 -21  -1   3   16.60    7.20
  21  -1  -3    9.10    6.20
 -21  -1   3   12.10    7.70
 -21   1   3   14.50    6.60
  21   1  -3    8.00    8.10
 -21   1   3   12.00    5.20
 -21   1   3   11.10    8.10
  21   1  -3   15.50    7.60
  21   1  -3   18.90    7.00
  21   1  -3   12.60    6.30
  19  -1  -3  127.59   15.90
  19  -1  -3  180.88   13.90
 -19  -1   3  161.78   12.40
 -19  -1   3  182.28   15.50
  19  -1  -3  135.69   19.70
 -19  -1   3  196.58   18.20
  19  -1  -3  124.79   16.90
  19   1  -3  160.38   17.00
  19   1  -3  160.68   17.00
  19   1  -3  163.98   13.70
  19   1  -3  191.88   14.20
 -19   1   3  180.48   15.50
 -19   1   3  172.48   12.60
 -19   1   3  182.98   18.80
 -19   1   3  188.38   13.80
 -17  -1   3  362.06   15.10
 -17  -1   3  331.97   15.60
  17  -1  -3  353.96   16.20
  17  -1  -3  343.87   19.70
 -17  -1   3  347.07   20.90
 -17  -1   3  335.67   18.30
  17  -1  -3  319.47   17.90
  17  -1  -3  349.77   21.30
  17   1  -3  338.27   16.50
  17   1  -3  323.47   19.60
 -17   1   3  348.37   17.30
 -17   1   3  340.57   15.30
 -17   1   3  349.27   21.40
  17   1  -3  340.07   16.20
  17   1  -3  326.67   19.40
 -17   1   3  336.97   18.00
  15  -1  -3 1838.52   55.69
  15  -1  -3 1804.12   54.49
 -15  -1   3 1840.22   57.09
 -15  -1   3 1780.72   53.89
  15  -1  -3 1801.02   52.79
 -15  -1   3 1866.71   50.49
 -15  -1   3 1756.62   50.49
  15  -1  -3 1788.92   50.49
  15   1  -3 1806.32   50.69
  15   1  -3 1818.22   51.29
 -15   1   3 1786.72   50.29
 -15   1   3 1832.32   53.59
 -15   1   3 1818.22   57.99
 -15   1   3 1868.31   53.29
  15   1  -3 1837.02   54.29
  15   1  -3 1825.12   54.99
  13  -1  -3 1715.43   50.19
 -13  -1   3 1833.02   48.70
 -13  -1   3 1785.92   51.69
  13  -1  -3 1839.52   53.39
  13  -1  -3 1833.92   52.29
  13  -1  -3 1718.13   48.20
 -13  -1   3 1753.82   48.50
 -13  -1   3 1835.92   54.39
  13   1  -3 1764.52   49.00
  13   1  -3 1783.32   48.60
 -13   1   3 1760.22   51.09
 -13   1   3 1768.92   51.09
  13   1  -3 1792.72   51.89
 -13   1   3 1758.02   55.19
 -13   1   3 1715.53   48.20
  13   1  -3 1769.32   52.49
  11  -1  -3  925.51   29.20
 -11  -1   3  914.71   26.30
 -11  -1   3  921.41   28.70
 -11  -1   3  914.51   30.60
  11  -1  -3  947.61   30.50
  11  -1  -3  873.61   24.90
  11  -1  -3  873.51   27.60
  11  -1  -3  852.61   25.50
 -11  -1   3  882.71   25.80
 -11   1   3  906.61   28.20
 -11   1   3  882.11   24.60
  11   1  -3  861.51   24.80
 -11   1   3  877.71   28.50
  11   1  -3  854.91   26.20
  11   1  -3  881.81   25.80
  11   1  -3  914.51   29.90
  11   1  -3  912.31   28.90
 -11   1   3  912.61   31.80
 -11   1   3  879.11   25.70
   9  -1  -3  358.46   11.80
  -9  -1   3  362.76   12.60
   9  -1  -3  366.56   12.00
  -9  -1   3  380.46   12.20
  -9  -1   3  372.76   15.40
   9  -1  -3  364.96   13.90
  -9  -1   3  380.56   14.30
   9  -1  -3  408.36   16.20
   9  -1  -3  383.36   14.70
   9   1  -3  361.16   11.90
   9   1  -3  379.66   15.50
   9   1  -3  367.76   14.60
   9   1  -3  346.17   12.20
   9   1  -3  358.36   12.10
  -9   1   3  396.26   14.90
  -9   1   3  381.46   16.60
  -9   1   3  367.56   11.80
  -9   1   3  375.66   13.80
  -7  -1   3 1062.79   31.30
  -7  -1   3 1003.30   28.60
   7  -1  -3 1114.59   31.90
  -7  -1   3 1029.10   29.40
  -7  -1   3 1082.79   30.40
  -7  -1   3 1090.79   28.60
   7  -1  -3 1086.39   30.30
   7  -1  -3 1126.09   31.30
   7   1  -3 1052.29   28.90
  -7   1   3 1082.89   29.90
   7   1  -3 1110.89   31.90
  -7   1   3 1090.29   29.00
  -7   1   3 1115.79   32.90
   7   1  -3 1002.10   28.30
   7   1  -3 1075.79   30.80
  -7   1   3 1099.49   31.20
   5  -1  -3 1809.82   47.00
  -5  -1   3 1780.22   45.40
  -5  -1   3 1716.13   45.00
  -5  -1   3 1823.32   44.30
   5  -1  -3 1711.03   45.60
  -5  -1   3 1817.92   45.70
  -5  -1   3 1819.52   46.50
   5  -1  -3 1739.13   46.90
  -5   1   3 1678.43   44.70
   5   1  -3 1782.52   47.10
  -5   1   3 1640.54   46.90
  -5   1   3 1709.33   45.10
   5   1  -3 1730.23   45.00
  -5   1   3 1705.93   46.50
  -5   1   3 1678.33   46.50
   5   1  -3 1806.92   46.10
   3  -1  -3 2513.25   62.69
  -3  -1   3 2464.45   61.09
  -3  -1   3 2482.35   61.99
   3  -1  -3 2468.15   61.49
   3  -1  -3 2564.54   63.49
  -3  -1   3 2397.96   62.19
  -3  -1   3 2447.56   62.59
  -3  -1   3 2376.36   61.79
  -3   1   3 2393.76   62.59
  -3   1   3 2390.46   62.99
   3   1  -3 2473.35   62.89
  -3   1   3 2332.37   62.19
  -3   1   3 2413.96   62.09
   3   1  -3 2566.14   61.79
   3   1  -3 2402.26   61.89
  -1  -1   3  487.55   13.80
   1  -1  -3  483.15   13.30
  -1  -1   3  502.25   13.90
   1  -1  -3  487.95   13.90
  -1  -1   3  495.15   14.40
  -1  -1   3  489.05   14.30
   1  -1  -3  461.85   12.80
   1  -1  -3  500.65   15.10
  -1   1   3  472.65   14.10
  -1   1   3  448.66   13.50
  -1   1   3  460.05   14.50
  -1   1   3  469.55   13.70
  -1   1   3  470.15   13.30
  -1   1   3  449.86   12.70
  -1   1   3  461.35   12.90
   1   1  -3  458.55   13.70
   1   1  -3  517.05   14.30
  -1   1   3  471.05   14.10
   1   1  -3  483.85   14.30
   1  -1   3  701.03   19.30
  -1  -1  -3  702.83   19.30
  -1  -1  -3  718.93   19.60
  -1  -1  -3  691.43   19.30
   1  -1   3  697.23   19.20
   1  -1   3  684.73   20.00
   1  -1   3  689.53   20.00
   1  -1   3  698.33   19.10
   1  -1   3  686.33   19.90
   1  -1   3  690.13   20.30
  -1  -1  -3  714.23   19.30
   1   1   3  727.63   19.50
   1   1   3  713.93   19.40
   1   1   3  708.83   19.40
   1   1   3  722.23   19.60
  -1   1  -3  672.73   20.20
   1   1   3  708.93   20.30
   1   1   3  705.13   19.30
  -1   1  -3  679.73   20.10
  -1   1  -3  782.62   19.50
  -1   1  -3  685.73   19.10
   1   1   3  705.33   19.50
   1   1   3  705.43   19.10
   3  -1   3  124.49    6.70
  -3  -1  -3  138.99    6.10
   3  -1   3  130.79    6.20
  -3  -1  -3  133.49    6.60
   3  -1   3  125.29    5.20
   3  -1   3  138.29    6.80
   3  -1   3  126.99    6.60
  -3  -1  -3  130.49    5.40
  -3  -1  -3  129.79    6.10
   3   1   3  130.29    5.40
   3   1   3  136.79    5.50
   3   1   3  141.29    6.20
  -3   1  -3  123.49    6.50
   3   1   3  129.09    6.00
   3   1   3  135.69    6.40
  -3   1  -3  121.39    6.30
   3   1   3  134.39    6.60
   3   1   3  134.59    6.20
  -3   1  -3  122.79    6.70
  -3   1  -3  120.89    5.20
   3   1   3  130.39    5.90
   5  -1   3 2555.74   64.39
  -5  -1  -3 2459.45   63.59
   5  -1   3 2463.85   66.69
   5  -1   3 2481.85   65.69
   5  -1   3 2405.06   65.99
  -5  -1  -3 2575.34   66.39
  -5  -1  -3 2545.95   65.29
   5  -1   3 2483.15   65.29
  -5  -1  -3 2546.45   65.79
   5   1   3 2542.15   65.39
   5   1   3 2565.64   64.99
  -5   1  -3 2477.15   66.49
  -5   1  -3 2415.46   65.09
   5   1   3 2576.64   66.39
   5   1   3 2435.66   63.49
   5   1   3 2516.25   65.09
  -5   1  -3 2547.45   66.29
   5   1   3 2559.14   65.19
   5   1   3 2594.24   63.29
  -7  -1  -3 1034.60   29.70
  -7  -1  -3  978.50   28.40
   7  -1   3  933.81   27.60
   7  -1   3  932.91   28.70
   7  -1   3  918.91   28.40
   7  -1   3  889.61   29.00
  -7  -1  -3  966.60   29.60
   7   1   3  977.90   28.10
  -7   1  -3  937.61   29.20
  -7   1  -3  908.21   29.60
   7   1   3  957.90   29.60
   7   1   3  974.50   28.40
   7   1   3  986.40   28.30
   7   1   3  984.30   28.20
  -7   1  -3  876.71   27.60
   9  -1   3 1780.82   48.80
   9  -1   3 1733.43   49.70
   9  -1   3 1716.93   50.59
  -9  -1  -3 1787.82   50.89
  -9  -1  -3 1797.62   49.40
   9  -1   3 1753.72   49.40
  -9  -1  -3 1792.52   50.89
  -9   1  -3 1676.63   48.20
   9   1   3 1762.62   50.69
  -9   1  -3 1771.72   50.59
   9   1   3 1781.02   48.90
   9   1   3 1802.82   49.20
  -9   1  -3 1734.43   51.39
   9   1   3 1760.22   49.10
   9   1   3 1769.82   49.20
 -11  -1  -3  919.71   31.10
 -11  -1  -3  888.31   28.60
  11  -1   3  889.01   28.50
  11  -1   3  826.02   28.70
  11  -1   3  832.02   30.10
  11  -1   3  853.21   28.90
 -11  -1  -3  891.91   30.50
 -11   1  -3  834.32   27.60
 -11   1  -3  862.61   30.10
  11   1   3  884.91   28.80
 -11   1  -3  866.41   31.10
  11   1   3  908.11   28.80
  11   1   3  891.31   28.40
  11   1   3  871.01   28.70
  13  -1   3   77.29   10.70
 -13  -1  -3   82.39    9.70
  13  -1   3   64.09   10.90
 -13  -1  -3   89.99   11.70
  13  -1   3   96.49   11.00
  13  -1   3   84.39   11.50
 -13  -1  -3   86.49   11.00
 -13   1  -3  101.29   11.90
 -13   1  -3  102.99   11.30
  13   1   3   68.99   10.50
  13   1   3   79.19    9.40
  13   1   3   64.29   10.20
 -13   1  -3   95.29   10.00
 -13   1  -3  101.39    9.40
  13   1   3   89.79   10.10
 -15  -1  -3   -4.00    5.20
 -15  -1  -3    5.30    5.40
 -15  -1  -3    1.30    4.40
  15  -1   3   -0.10    5.40
  15  -1   3    7.00    5.70
  15  -1   3   -3.60    5.60
 -15   1  -3    0.50    4.10
  15   1   3    0.60    4.90
 -15   1  -3    1.20    4.30
  15   1   3    4.10    4.50
 -15   1  -3    0.50    5.20
 -15   1  -3   -0.10    5.10
  15   1   3    4.00    5.40
  15   1   3   -0.80    5.00
 -17  -1  -3   88.89   12.50
  17  -1   3   73.19   10.30
  17  -1   3  103.29   13.60
  17  -1   3  106.99   14.10
 -17  -1  -3  106.69   15.20
 -17  -1  -3  109.19   14.20
 -17   1  -3   86.59   14.20
 -17   1  -3  110.79   13.00
  17   1   3  105.19   13.90
  17   1   3   80.79   10.50
  17   1   3   97.39   13.40
 -19  -1  -3  260.67   20.00
  19  -1   3  208.18   20.00
  19  -1   3  216.68   19.40
 -19  -1  -3  237.18   18.00
 -19  -1  -3  262.07   21.30
  19  -1   3  235.48   19.10
  19   1   3  234.98   19.30
  19   1   3  261.77   19.80
 -19   1  -3  189.98   20.50
 -19   1  -3  227.38   19.60
  19   1   3  252.07   19.00
 -19   1  -3  214.48   18.00
  21  -1   3  150.18   18.80
 -21  -1  -3  160.08   18.80
  21  -1   3  109.99   17.50
  21  -1   3  128.39   19.30
 -21  -1  -3  138.09   17.00
 -21  -1  -3  166.08   20.10
 -21   1  -3  101.89   20.00
 -21   1  -3  147.79   18.40
  21   1   3  145.49   18.20
  21   1   3  123.89   18.20
  21   1   3  146.29   19.20
 -21   1  -3  130.89   16.90
  23  -1   3    3.40    9.60
 -23  -1  -3   10.10    9.80
 -23  -1  -3    8.50    7.90
 -23  -1  -3    0.80    8.90
  23  -1   3   -0.10    9.80
  23  -1   3    1.20    8.60
 -23   1  -3   -0.40    8.80
 -23   1  -3   -4.70    7.60
 -23   1  -3   -1.90    9.40
  23   1   3    4.90    9.40
  23   1   3  -13.10    8.90
  23   1   3  -10.10    8.20
  25  -1   3   12.40   11.50
  25  -1   3    9.60   11.30
 -25  -1  -3   14.80   10.40
  25  -1   3   15.50   11.10
 -25  -1  -3    0.50   10.70
 -25  -1  -3   17.50    9.40
 -25   1  -3   25.70   11.40
 -25   1  -3   15.30   11.60
  25   1   3   16.40   11.50
  25   1   3    7.40   11.90
 -25   1  -3   15.70    9.50
  25   1   3   12.40   10.40
 -28  -2   3   -7.40    8.50
 -28  -2   3   -1.80    8.30
  28  -2  -3   -7.70   11.60
  28  -2  -3    2.40    9.80
 -28   2   3   -8.10    9.50
  28   2  -3   -4.60   11.20
  28   2  -3  -17.70    9.00
 -28   2   3   -6.80    8.30
  26  -2  -3  216.78   22.30
  26  -2  -3  173.38   24.70
 -26  -2   3  192.98   20.40
 -26  -2   3  209.48   22.40
  26   2  -3  199.58   19.80
  26   2  -3  245.78   21.20
 -26   2   3  167.18   24.20
  26   2  -3  189.68   22.30
 -26   2   3  193.58   20.10
 -24  -2   3  264.17   22.40
  24  -2  -3  199.58   21.40
 -24  -2   3  224.88   19.60
  24  -2  -3  176.18   23.80
 -24  -2   3  196.78   16.30
 -24   2   3  199.18   23.90
  24   2  -3  225.78   19.00
  24   2  -3  176.68   18.00
 -24   2   3  214.88   19.30
  24   2  -3  193.48   21.30
  22  -2  -3   33.50   11.40
 -22  -2   3   41.50    7.10
  22  -2  -3   36.30   10.30
  22  -2  -3   52.29    8.50
 -22  -2   3   52.59    9.70
 -22  -2   3   51.49   10.10
  22   2  -3   47.20    8.80
  22   2  -3   37.10    9.40
 -22   2   3   43.60   10.60
  22   2  -3   39.60    8.40
 -22   2   3   70.79   11.00
 -22   2   3   51.09    9.10
  22   2  -3   36.10   10.00
 -20  -2   3    6.30    6.40
 -20  -2   3    5.40    4.60
 -20  -2   3    7.30    6.80
  20  -2  -3   -0.50    7.80
  20  -2  -3    9.00    9.00
  20  -2  -3    5.50    5.90
  20   2  -3   -3.70    7.00
 -20   2   3   12.90    6.20
  20   2  -3    2.90    6.40
 -20   2   3   12.30    7.70
  20   2  -3   -3.60    5.70
 -20   2   3    7.30    5.10
 -20   2   3    3.40    4.70
  20   2  -3    1.50    5.80
 -18  -2   3  644.34   29.20
 -18  -2   3  633.04   23.60
 -18  -2   3  601.34   26.80
  18  -2  -3  614.84   27.50
  18  -2  -3  626.04   30.60
  18  -2  -3  592.04   27.40
  18  -2  -3  681.63   24.60
 -18   2   3  648.34   30.60
 -18   2   3  689.23   26.80
  18   2  -3  634.24   27.20
 -18   2   3  700.43   26.90
  18   2  -3  654.53   28.30
  18   2  -3  648.24   24.50
 -18   2   3  617.14   23.40
  18   2  -3  616.54   24.40
  16  -2  -3 1563.24   44.80
 -16  -2   3 1553.14   50.59
  16  -2  -3 1545.35   47.90
 -16  -2   3 1496.45   44.50
 -16  -2   3 1506.65   48.20
  16  -2  -3 1565.54   50.99
 -16  -2   3 1528.75   43.40
  16  -2  -3 1473.65   48.00
  16   2  -3 1536.65   45.10
  16   2  -3 1545.85   45.10
  16   2  -3 1557.04   49.30
 -16   2   3 1516.15   44.60
 -16   2   3 1643.34   48.70
 -16   2   3 1578.14   47.60
  16   2  -3 1547.25   47.90
 -16   2   3 1586.84   52.69
 -14  -2   3 2733.03   76.99
 -14  -2   3 2772.32   72.29
  14  -2  -3 2823.02   79.39
 -14  -2   3 2793.12   78.99
  14  -2  -3 2756.12   76.49
  14  -2  -3 2723.73   76.69
  14  -2  -3 2672.83   73.29
 -14  -2   3 2764.42   73.69
  14   2  -3 2851.31   76.79
  14   2  -3 2805.52   78.19
 -14   2   3 2891.21   77.99
  14   2  -3 2780.02   73.69
  14   2  -3 2737.33   73.79
 -14   2   3 2789.92   76.19
 -14   2   3 2790.82   81.39
 -12  -2   3 2936.21   77.49
  12  -2  -3 3109.39   82.89
 -12  -2   3 3140.29   82.49
 -12  -2   3 3037.60   80.89
  12  -2  -3 2966.20   80.19
  12  -2  -3 2846.52   77.19
 -12  -2   3 2959.40   76.49
  12  -2  -3 3020.10   80.19
  12   2  -3 2903.41   77.29
 -12   2   3 2939.71   75.89
  12   2  -3 3024.90   81.69
 -12   2   3 2931.71   79.39
 -12   2   3 2953.90   81.49
  12   2  -3 2923.11   76.49
 -12   2   3 2912.71   84.29
  12   2  -3 3033.80   79.89
  10  -2  -3 1253.87   37.00
  10  -2  -3 1331.37   39.20
 -10  -2   3 1205.48   33.80
 -10  -2   3 1274.57   34.60
  10  -2  -3 1214.58   34.10
  10  -2  -3 1269.97   36.70
 -10  -2   3 1271.17   37.70
 -10  -2   3 1299.37   37.10
 -10   2   3 1235.68   40.10
 -10   2   3 1252.87   38.30
  10   2  -3 1255.17   34.20
 -10   2   3 1224.88   35.70
  10   2  -3 1225.48   37.90
  10   2  -3 1244.88   36.30
  10   2  -3 1183.68   34.00
 -10   2   3 1212.88   33.70
   8  -2  -3    3.80    2.80
   8  -2  -3    7.10    1.90
  -8  -2   3    2.00    1.50
  -8  -2   3   -0.50    1.90
  -8  -2   3    3.60    1.60
  -8  -2   3    2.20    2.10
   8  -2  -3    2.30    2.30
   8  -2  -3    2.20    2.90
   8   2  -3   -3.80    2.10
  -8   2   3    1.90    2.20
   8   2  -3    2.10    1.70
  -8   2   3    5.50    3.10
  -8   2   3    0.80    1.40
   8   2  -3    2.10    3.00
  -8   2   3    5.50    2.00
   8   2  -3    2.30    1.70
   6  -2  -3 6947.90  173.08
  -6  -2   3 7093.99  171.88
  -6  -2   3 7242.38  170.48
  -6  -2   3 6776.72  170.48
   6  -2  -3 6738.93  172.08
  -6  -2   3 7077.89  172.18
   6  -2  -3 7115.49  172.58
  -6   2   3 6793.62  170.18
   6   2  -3 6840.62  170.78
  -6   2   3 6658.53  173.48
  -6   2   3 6819.12  172.18
  -6   2   3 6743.52  170.88
  -6   2   3 6664.83  173.78
   6   2  -3 6924.91  173.18
   6   2  -3 6840.32  170.98
  -4  -2   3 1277.67   32.80
  -4  -2   3 1235.78   33.70
  -4  -2   3 1266.17   33.50
   4  -2  -3 1256.97   34.40
   4  -2  -3 1246.38   33.60
  -4  -2   3 1218.48   33.10
   4  -2  -3 1282.07   34.70
  -4   2   3 1231.88   34.10
  -4   2   3 1226.78   33.60
   4   2  -3 1244.78   34.70
   4   2  -3 1221.18   33.10
  -4   2   3 1193.78   34.90
   4   2  -3 1219.08   33.20
   4   2  -3 1242.48   32.40
  -4   2   3 1169.18   34.00
  -2  -2   3 4843.02  116.39
  -2  -2   3 4674.23  116.49
   2  -2  -3 4731.93  116.09
   2  -2  -3 4555.34  114.79
  -2  -2   3 4861.31  116.39
  -2  -2   3 4737.33  116.69
   2  -2  -3 4649.13  116.59
  -2   2   3 4615.04  116.19
   2   2  -3 4691.83  116.59
  -2   2   3 4441.96  115.59
  -2   2   3 4602.34  116.79
   2   2  -3 4756.02  116.89
  -2   2   3 4422.26  116.89
  -2   2   3 4628.54  117.19
   2   2  -3 4616.74  116.29
   0  -2  -3   50.69    3.20
   0  -2  -3   51.59    3.20
   0  -2  -3   47.50    3.80
   0  -2   3   48.80    3.80
   0  -2   3   52.89    4.60
   0  -2   3   48.70    4.00
   0  -2  -3   47.40    3.60
   0  -2   3   46.90    3.80
   0  -2   3   46.00    4.00
   0   2   3   53.09    3.80
   0   2   3   49.70    4.20
   0   2   3   50.79    2.80
   0   2   3   49.20    4.30
   0   2   3   49.20    3.20
   0   2   3   49.50    3.60
   0   2  -3   49.00    4.10
   0   2  -3   38.40    3.90
   0   2   3   50.09    3.50
   0   2  -3   46.20    4.00
  -2  -2  -3   25.50    3.10
   2  -2   3   31.60    3.80
  -2  -2  -3   27.10    3.50
  -2  -2  -3   31.30    3.30
   2  -2   3   30.60    4.40
   2  -2   3   30.90    4.00
   2  -2   3   28.70    3.90
   2   2   3   23.00    3.20
   2   2   3   27.20    3.70
  -2   2  -3   26.50    3.90
   2   2   3   27.30    3.30
   2   2   3   27.70    2.80
   2   2   3   27.10    3.60
   2   2   3   24.30    3.70
  -2   2  -3   36.60    3.80
   2   2   3   25.70    3.20
   2   2   3   22.00    2.60
  -2   2  -3   25.90    4.00
   4  -2   3 2302.27   61.89
   4  -2   3 2295.27   61.69
   4  -2   3 2357.46   61.39
  -4  -2  -3 2393.76   61.09
   4  -2   3 2399.56   59.79
  -4  -2  -3 2345.27   61.69
   4  -2   3 2362.16   62.59
  -4  -2  -3 2373.76   60.69
  -4  -2  -3 2402.86   61.19
   4   2   3 2373.26   61.99
   4   2   3 2342.67   60.79
   4   2   3 2385.56   60.59
  -4   2  -3 2271.27   61.79
   4   2   3 2374.56   61.09
  -4   2  -3 2281.87   59.59
   4   2   3 2380.16   61.09
  -4   2  -3 2330.07   62.39
   6  -2   3 2793.92   75.69
   6  -2   3 2875.91   76.99
   6  -2   3 2806.22   75.59
  -6  -2  -3 2928.51   74.89
  -6  -2  -3 2889.21   75.99
  -6  -2  -3 2895.81   75.19
   6  -2   3 2897.61   73.89
   6  -2   3 2896.21   75.49
  -6   2  -3 2821.42   72.29
   6   2   3 2921.61   75.69
   6   2   3 2957.10   73.29
   6   2   3 2862.61   74.69
  -6   2  -3 2824.62   75.39
   6   2   3 2929.61   74.79
  -6   2  -3 2858.81   75.79
  -6   2  -3 2911.21   76.79
   6   2   3 2836.42   74.49
   8  -2   3 4822.62  123.29
   8  -2   3 4716.23  122.79
  -8  -2  -3 4749.12  123.39
   8  -2   3 4834.02  121.29
   8  -2   3 4736.73  122.59
  -8  -2  -3 4678.83  122.79
  -8  -2  -3 4748.62  121.79
  -8   2  -3 4821.62  123.29
   8   2   3 4828.52  121.89
   8   2   3 4618.64  121.49
  -8   2  -3 4845.02  122.29
   8   2   3 4698.53  121.69
   8   2   3 4731.03  122.59
  -8   2  -3 4871.81  124.49
  10  -2   3  964.90   32.20
  10  -2   3  994.20   32.20
 -10  -2  -3  988.00   32.70
  10  -2   3 1023.60   31.20
 -10  -2  -3 1015.60   32.90
 -10  -2  -3  990.70   31.10
  10  -2   3 1001.30   32.20
 -10   2  -3 1011.30   34.00
  10   2   3  994.70   31.30
  10   2   3  998.60   31.70
  10   2   3  986.70   31.20
 -10   2  -3 1025.20   31.60
 -10   2  -3  996.70   32.30
  10   2   3  976.80   31.10
 -12  -2  -3  621.14   25.30
  12  -2   3  660.33   25.40
 -12  -2  -3  619.54   24.90
  12  -2   3  630.74   24.80
  12  -2   3  651.33   23.90
 -12  -2  -3  630.74   23.40
  12  -2   3  630.14   24.50
 -12   2  -3  646.64   24.80
  12   2   3  637.54   23.50
  12   2   3  624.24   24.00
 -12   2  -3  673.43   23.90
 -12   2  -3  653.43   26.40
  12   2   3  595.84   23.40
  12   2   3  631.34   23.70
  14  -2   3  140.09   12.80
  14  -2   3  157.58   13.60
  14  -2   3  110.19   13.20
 -14  -2  -3  116.19   11.40
  14  -2   3  147.79   13.60
 -14  -2  -3  129.39   13.40
 -14  -2  -3  145.19   13.20
  14   2   3  121.99   12.00
 -14   2  -3  132.79   14.50
 -14   2  -3  142.59   12.40
 -14   2  -3  140.49   13.20
  14   2   3  128.49   12.30
  14   2   3  131.99   12.40
  14   2   3  129.29   12.00
 -16  -2  -3   11.70    6.20
 -16  -2  -3    3.40    5.50
  16  -2   3    8.00    7.10
 -16  -2  -3    9.30    6.20
  16  -2   3   10.20    6.50
  16  -2   3    7.70    6.90
  16  -2   3    5.40    6.10
  16   2   3    4.30    6.30
  16   2   3    2.40    6.10
 -16   2  -3    4.50    5.30
 -16   2  -3    2.70    6.30
  16   2   3   10.50    5.70
 -16   2  -3    1.70    6.50
  16   2   3   -4.60    6.00
 -16   2  -3   16.80    5.80
  18  -2   3  514.25   25.90
 -18  -2  -3  483.45   25.40
  18  -2   3  460.85   25.10
  18  -2   3  494.45   25.10
 -18  -2  -3  472.35   23.50
 -18  -2  -3  520.35   27.00
 -18   2  -3  487.95   25.70
  18   2   3  480.95   24.40
  18   2   3  470.45   24.50
 -18   2  -3  463.65   27.20
 -18   2  -3  479.25   23.80
  18   2   3  455.05   24.10
 -20  -2  -3  152.58   19.10
 -20  -2  -3  136.49   17.80
  20  -2   3  135.79   18.70
  20  -2   3  139.49   18.10
  20  -2   3  152.18   18.50
 -20  -2  -3  130.69   16.00
 -20   2  -3  139.59   16.50
  20   2   3  132.99   16.70
 -20   2  -3  141.49   19.80
 -20   2  -3  128.39   17.70
  20   2   3  129.09   17.80
  20   2   3  153.58   17.80
 -22  -2  -3   -0.40    7.30
  22  -2   3   -3.10    9.50
 -22  -2  -3   -0.90    8.00
  22  -2   3    1.60    8.40
 -22  -2  -3   -1.00    8.10
  22  -2   3    6.00    9.20
 -22   2  -3   -8.20    7.00
 -22   2  -3   -1.10    8.20
  22   2   3   -0.90    8.20
  22   2   3   -2.90    8.70
 -22   2  -3    0.60    8.60
 -24  -2  -3    4.90    9.60
 -24  -2  -3    9.10    9.60
 -24  -2  -3    6.10    8.40
  24  -2   3    7.80    9.60
  24  -2   3   18.00   11.40
  24  -2   3   15.20   11.30
  24   2   3    4.30   10.20
  24   2   3   -7.60   10.90
 -24   2  -3   10.30    8.40
  24   2   3    4.80    9.90
 -24   2  -3   13.40   10.70
 -24   2  -3   21.80   10.00
  27  -3  -3   -5.70   12.30
 -27  -3   3    3.70    8.90
 -27  -3   3    6.60    8.60
  27  -3  -3   22.90   11.70
  27   3  -3    4.00   10.60
 -27   3   3    9.30   10.80
 -27   3   3    4.70    8.60
  27   3  -3  -11.50    8.80
 -25  -3   3    0.10    7.80
 -25  -3   3    0.80    7.70
  25  -3  -3    7.50   10.10
  25  -3  -3    6.20   11.40
 -25  -3   3    2.50    6.50
  25   3  -3    2.50    8.10
 -25   3   3    7.80    9.30
 -25   3   3   11.70    8.20
  25   3  -3   -1.90    9.00
  23  -3  -3    3.10    8.60
  23  -3  -3   -5.00    9.40
 -23  -3   3    4.20    7.30
 -23  -3   3    1.80    7.00
 -23  -3   3   -1.90    5.50
  23  -3  -3   -3.50   10.40
 -23   3   3   -2.00    8.30
  23   3  -3  -11.20    7.90
  23   3  -3    1.90    7.20
 -23   3   3    4.90    7.30
  23   3  -3   -3.30    7.40
 -21  -3   3   42.20    8.60
 -21  -3   3   42.40    9.10
 -21  -3   3   41.60    7.10
  21  -3  -3   46.70   10.80
  21  -3  -3   44.50   11.50
  21   3  -3   31.60    9.40
 -21   3   3   37.90    7.90
 -21   3   3   36.70   10.10
 -21   3   3   45.00    8.80
  21   3  -3   49.30    8.60
  21   3  -3   38.60    9.70
  19  -3  -3  204.68   18.90
 -19  -3   3  161.78   17.50
  19  -3  -3  229.88   14.60
 -19  -3   3  197.48   13.50
  19  -3  -3  214.78   22.50
 -19  -3   3  177.08   16.30
 -19   3   3  195.58   13.10
  19   3  -3  170.38   16.40
  19   3  -3  191.68   14.00
 -19   3   3  194.78   15.50
 -19   3   3  189.68   19.60
 -19   3   3  196.08   16.60
  19   3  -3  171.78   16.80
  17  -3  -3  831.82   32.20
 -17  -3   3  812.12   27.90
 -17  -3   3  795.32   31.30
  17  -3  -3  759.02   31.50
  17  -3  -3  810.02   35.10
 -17  -3   3  840.72   32.90
  17  -3  -3  820.52   28.30
 -17   3   3  892.11   32.50
 -17   3   3  819.92   29.90
 -17   3   3  871.31   35.70
  17   3  -3  809.92   30.50
  17   3  -3  855.51   32.60
  17   3  -3  808.22   28.00
  15  -3  -3 1103.49   40.20
  15  -3  -3 1034.00   36.30
 -15  -3   3 1090.09   37.40
 -15  -3   3 1062.99   36.40
  15  -3  -3 1110.89   33.90
 -15  -3   3 1116.79   33.50
  15  -3  -3 1062.69   37.10
 -15   3   3 1071.69   35.10
  15   3  -3 1115.69   37.80
 -15   3   3 1128.19   37.90
 -15   3   3 1120.39   40.90
  15   3  -3 1092.69   35.70
  15   3  -3 1065.19   31.80
  15   3  -3 1051.49   33.10
 -13  -3   3  592.74   22.80
  13  -3  -3  567.64   22.20
 -13  -3   3  585.14   22.90
 -13  -3   3  590.14   20.10
  13  -3  -3  565.54   20.40
  13  -3  -3  589.04   26.00
  13  -3  -3  567.54   23.70
  13   3  -3  580.84   19.80
 -13   3   3  620.64   24.70
 -13   3   3  574.44   21.40
  13   3  -3  568.14   19.20
 -13   3   3  595.64   26.40
  13   3  -3  562.84   23.40
 -13   3   3  617.54   18.60
  13   3  -3  591.64   22.00
 -11  -3   3 3086.79   81.99
  11  -3  -3 3034.40   81.09
  11  -3  -3 3016.20   82.49
 -11  -3   3 3076.49   81.99
  11  -3  -3 3149.78   84.29
 -11  -3   3 3077.89   79.39
  11  -3  -3 2974.50   79.09
 -11   3   3 2997.10   78.39
 -11   3   3 2969.40   80.19
  11   3  -3 3007.30   78.59
  11   3  -3 3115.09   83.29
 -11   3   3 3045.00   84.29
  11   3  -3 3031.50   78.99
  11   3  -3 3102.29   80.79
 -11   3   3 3019.10   85.89
  -9  -3   3   30.40    4.80
   9  -3  -3   33.20    6.10
  -9  -3   3   22.90    4.20
   9  -3  -3   21.30    4.80
   9  -3  -3   26.30    5.00
  -9  -3   3   34.70    6.00
  -9  -3   3   34.40    5.90
   9  -3  -3   30.90    5.20
   9   3  -3   22.90    4.70
   9   3  -3   26.40    3.30
  -9   3   3   21.50    4.50
   9   3  -3   26.80    4.10
  -9   3   3   24.10    5.00
   9   3  -3   21.20    3.30
  -7  -3   3   20.10    3.20
   7  -3  -3   25.90    4.00
  -7  -3   3   15.90    2.70
  -7  -3   3   17.20    2.60
  -7  -3   3   20.00    3.40
   7  -3  -3   14.30    3.50
  -7  -3   3   19.80    3.00
   7   3  -3   15.00    3.60
   7   3  -3   19.90    3.20
  -7   3   3   15.60    3.60
  -7   3   3   23.70    3.60
   7   3  -3   16.80    2.90
  -7   3   3   28.20    4.40
   7   3  -3   15.60    2.80
  -7   3   3   19.10    3.80
  -7   3   3   25.20    4.00
   7   3  -3   18.70    3.20
  -5  -3   3   41.80    4.40
   5  -3  -3   30.00    4.70
  -5  -3   3   38.40    3.80
  -5  -3   3   38.30    4.10
  -5  -3   3   37.50    3.80
   5  -3  -3   34.40    5.00
   5  -3  -3   26.50    3.70
   5  -3  -3   26.10    3.60
  -5   3   3   29.50    4.20
   5   3  -3   39.70    5.40
  -5   3   3   31.30    5.40
  -5   3   3   26.60    4.90
   5   3  -3   35.70    3.60
   5   3  -3   35.30    4.40
  -5   3   3   26.10    4.20
   5   3  -3   39.30    3.60
  -3  -3   3 1461.45   37.90
  -3  -3   3 1382.66   37.60
   3  -3  -3 1386.36   36.50
   3  -3  -3 1398.36   38.00
  -3  -3   3 1471.05   37.90
   3  -3  -3 1409.36   38.20
  -3  -3   3 1414.96   37.80
  -3   3   3 1392.86   38.60
  -3   3   3 1408.86   37.80
   3   3  -3 1435.56   38.50
   3   3  -3 1411.66   37.80
  -3   3   3 1315.47   37.50
  -3   3   3 1355.06   38.30
   3   3  -3 1459.35   38.10
  -3   3   3 1365.96   39.80
  -1  -3   3  632.64   17.90
  -1  -3   3  618.34   18.40
   1  -3  -3  534.95   16.60
   1  -3  -3  569.84   17.50
  -1  -3   3  627.24   18.20
  -1  -3   3  600.54   17.40
  -1  -3   3  605.34   18.20
   1   3  -3  588.24   18.20
   1   3  -3  620.54   17.70
   1   3  -3  624.74   18.10
  -1   3   3  530.35   18.20
  -1   3   3  544.25   18.30
  -1   3   3  538.15   17.30
  -1  -3  -3  319.17   11.20
   1  -3   3  314.57   11.90
  -1  -3  -3  315.27   10.90
  -1  -3  -3  308.77   10.40
   1  -3   3  306.77   11.10
   1  -3   3  306.67   11.50
  -1  -3  -3  303.77    9.90
   1  -3   3  328.87   11.40
  -1   3  -3  300.07   11.50
   1   3   3  317.87   10.90
   1   3   3  318.97   12.00
   1   3   3  308.67   11.60
  -1   3  -3  302.17   10.90
   1   3   3  317.37   10.70
   1   3   3  313.07   10.80
  -1   3  -3  311.67   11.90
  -3  -3  -3  233.08    9.10
   3  -3   3  223.18    9.60
   3  -3   3  235.68   10.10
  -3  -3  -3  224.38    9.00
   3  -3   3  227.98   10.50
   3  -3   3  229.98   10.10
  -3  -3  -3  224.38    9.20
  -3   3  -3  221.78   10.00
   3   3   3  241.18    9.80
   3   3   3  230.58    9.20
  -3   3  -3  213.38    8.70
   3   3   3  234.98   10.30
   3   3   3  224.78    9.20
  -3   3  -3  234.38   10.30
  -5  -3  -3 1072.09   30.60
   5  -3   3 1106.29   32.20
   5  -3   3 1109.79   33.00
   5  -3   3 1123.79   33.40
  -5  -3  -3 1121.89   31.50
  -5  -3  -3 1114.39   31.40
  -5  -3  -3 1093.89   31.80
   5  -3   3 1113.49   32.60
   5   3   3 1080.29   31.50
   5   3   3 1099.79   31.40
  -5   3  -3 1118.39   30.00
  -5   3  -3 1103.09   32.70
   5   3   3 1078.49   31.30
   5   3   3 1092.19   31.40
   5   3   3 1077.59   32.70
  -5   3  -3 1144.39   33.40
   7  -3   3 2765.42   72.89
  -7  -3  -3 2711.53   71.59
  -7  -3  -3 2624.14   71.59
  -7  -3  -3 2825.52   71.99
   7  -3   3 2676.23   73.19
   7  -3   3 2734.83   70.89
   7  -3   3 2789.82   73.29
  -7  -3  -3 2637.14   72.49
  -7   3  -3 2794.42   74.29
   7   3   3 2709.63   71.89
  -7   3  -3 2684.23   68.89
  -7   3  -3 2760.92   73.09
   7   3   3 2684.33   73.39
  -7   3  -3 2737.63   72.79
   7   3   3 2642.74   71.59
   7   3   3 2678.03   71.49
   7   3   3 2730.03   70.79
   9  -3   3 1770.42   51.19
   9  -3   3 1760.12   50.99
  -9  -3  -3 1696.63   50.59
  -9  -3  -3 1738.13   50.39
  -9  -3  -3 1791.42   49.70
   9  -3   3 1830.72   51.19
   9  -3   3 1799.12   49.40
   9   3   3 1722.13   47.40
   9   3   3 1769.42   49.70
  -9   3  -3 1824.92   52.79
   9   3   3 1763.52   49.99
  -9   3  -3 1868.31   51.19
   9   3   3 1740.33   49.60
   9   3   3 1681.83   50.79
  -9   3  -3 1774.52   50.89
  11  -3   3  823.52   28.50
  11  -3   3  825.12   27.50
  11  -3   3  817.92   29.00
 -11  -3  -3  738.03   27.80
 -11  -3  -3  799.02   26.90
 -11  -3  -3  767.92   28.20
  11  -3   3  787.32   28.40
  11   3   3  744.53   26.70
  11   3   3  765.22   28.20
 -11   3  -3  800.22   28.20
 -11   3  -3  818.72   30.30
  11   3   3  793.22   27.30
 -11   3  -3  874.21   28.80
  11   3   3  782.12   26.80
  13  -3   3  296.97   17.20
 -13  -3  -3  269.57   16.60
  13  -3   3  286.67   17.00
 -13  -3  -3  271.47   16.50
  13  -3   3  274.87   16.00
 -13  -3  -3  277.07   15.20
  13  -3   3  295.27   17.60
  13   3   3  264.77   16.20
 -13   3  -3  298.37   16.50
  13   3   3  264.17   15.50
 -13   3  -3  267.67   17.90
  13   3   3  285.67   15.40
 -13   3  -3  272.87   16.40
  13   3   3  272.47   15.70
  15  -3   3  479.05   23.10
 -15  -3  -3  474.75   23.20
  15  -3   3  449.86   21.90
  15  -3   3  416.76   22.80
 -15  -3  -3  454.15   21.00
 -15  -3  -3  472.15   22.80
  15  -3   3  447.56   23.20
 -15   3  -3  409.16   24.20
  15   3   3  437.26   22.00
 -15   3  -3  466.75   21.80
  15   3   3  454.05   22.60
 -15   3  -3  410.96   22.40
  15   3   3  473.75   21.80
  15   3   3  452.95   21.30
  17  -3   3  191.08   17.90
  17  -3   3  188.98   16.80
 -17  -3  -3  169.18   17.20
 -17  -3  -3  181.48   17.00
  17  -3   3  199.48   17.90
  17  -3   3  216.38   18.00
 -17  -3  -3  157.68   15.60
  17   3   3  176.78   16.30
  17   3   3  169.98   16.40
 -17   3  -3  176.98   17.20
  17   3   3  129.49   16.30
 -17   3  -3  217.68   19.20
  17   3   3  148.19   16.30
 -19  -3  -3   15.10    7.90
  19  -3   3    7.20    8.50
 -19  -3  -3    7.50    6.70
  19  -3   3    5.30    7.50
  19  -3   3   13.00    8.50
 -19  -3  -3   11.30    7.20
  19   3   3   10.30    7.60
  19   3   3    1.50    7.70
 -19   3  -3   13.20    7.20
  19   3   3   -2.50    7.70
 -19   3  -3   16.80    8.50
 -19   3  -3   10.10    7.60
  21  -3   3   -2.10    8.90
  21  -3   3   -0.20    8.60
  21  -3   3    7.70    9.10
 -21  -3  -3    4.30    7.70
 -21  -3  -3    9.80    8.10
 -21  -3  -3   12.30    8.60
 -21   3  -3    7.90    7.70
 -21   3  -3    7.20    8.40
  21   3   3    0.30    8.70
 -21   3  -3    9.70    8.50
  21   3   3   -8.20    9.20
  21   3   3   -2.20    8.00
  23  -3   3   31.70   11.30
  23  -3   3   21.20   10.50
 -23  -3  -3   20.30    9.90
  23  -3   3   24.00   10.60
 -23  -3  -3   25.40    8.90
  23   3   3   12.00   10.10
  23   3   3   30.60   10.90
 -23   3  -3   27.60    8.90
 -23   3  -3   18.80   10.30
  23   3   3    9.70   10.60
 -23   3  -3   26.00    9.70
  25  -3   3   51.19   13.00
  25  -3   3   79.29   14.50
  25  -3   3   60.69   19.30
 -25  -3  -3   33.60   15.30
 -25  -3  -3   56.59   11.30
 -25   3  -3   56.39   11.40
  25   3   3   57.19   13.60
 -25   3  -3   69.29   13.10
 -25   3  -3   60.69   14.60
  25   3   3   37.50   13.10
  25   3   3   51.59   14.00
  28  -4  -3   67.49   16.50
  28  -4  -3   63.89   15.50
  28   4  -3   67.39   15.30
 -28   4   3   63.29   12.70
 -26  -4   3  117.39   19.10
  26  -4  -3   85.59   16.30
 -26  -4   3  151.58   20.20
  26  -4  -3  101.29   16.40
 -26  -4   3  112.79   15.90
  26   4  -3  136.69   20.90
  26   4  -3  124.09   18.70
 -26   4   3  128.99   18.20
 -26   4   3  133.59   22.90
 -24  -4   3  189.88   17.40
 -24  -4   3  186.58   20.30
  24  -4  -3  189.48   22.90
  24  -4  -3  171.28   25.00
 -24  -4   3  194.08   21.00
  24   4  -3  187.58   20.70
 -24   4   3  216.28   19.40
  24   4  -3  204.38   20.80
 -24   4   3  212.88   23.20
  24   4  -3  206.98   18.60
 -22  -4   3  180.58   15.70
  22  -4  -3  185.98   23.60
 -22  -4   3  174.68   18.60
  22  -4  -3  201.88   21.30
  22  -4  -3  203.58   17.20
 -22  -4   3  169.48   19.10
 -22   4   3  193.48   22.20
 -22   4   3  198.88   18.50
  22   4  -3  201.98   16.80
  22   4  -3  188.48   18.90
  22   4  -3  167.28   19.20
 -22   4   3  179.68   17.20
 -20  -4   3  162.18   17.10
  20  -4  -3  197.88   19.80
  20  -4  -3  210.68   23.20
 -20  -4   3  178.68   17.60
 -20  -4   3  186.28   14.60
  20   4  -3  162.28   18.20
 -20   4   3  200.68   16.10
 -20   4   3  186.08   17.90
  20   4  -3  159.68   17.10
  20   4  -3  222.08   15.40
 -20   4   3  173.98   21.10
  18  -4  -3  195.78   22.30
  18  -4  -3  216.68   14.60
 -18  -4   3  180.18   15.60
 -18  -4   3  190.58   13.00
  18  -4  -3  175.98   18.20
 -18  -4   3  165.58   15.20
 -18   4   3  173.38   19.50
 -18   4   3  170.68   14.40
 -18   4   3  163.48   16.60
  18   4  -3  143.09   15.10
  18   4  -3  162.48   16.50
  18   4  -3  191.98   13.20
  16  -4  -3   27.40    6.00
 -16  -4   3   30.60    5.00
  16  -4  -3   29.50   10.50
 -16  -4   3   25.60    5.90
 -16  -4   3   22.70    5.50
  16  -4  -3   21.30    7.70
  16  -4  -3   25.50    9.30
 -16   4   3   23.00    7.10
 -16   4   3   25.20    5.60
  16   4  -3   27.40    6.60
  16   4  -3   24.00    5.90
 -16   4   3   26.40    6.60
  16   4  -3   25.70    5.30
 -14  -4   3    8.50    4.00
  14  -4  -3    5.30    6.00
  14  -4  -3   -4.70    4.30
  14  -4  -3   -6.60    4.10
 -14  -4   3    4.80    3.50
 -14  -4   3    7.60    3.30
  14  -4  -3    2.10    7.00
 -14   4   3    3.90    4.30
  14   4  -3    6.80    4.50
 -14   4   3    3.80    2.40
 -14   4   3    5.70    4.80
 -14   4   3    3.70    3.60
  14   4  -3    3.90    3.40
  14   4  -3    3.20    2.90
  14   4  -3    6.00    3.70
 -12  -4   3   57.09    7.90
  12  -4  -3   50.49    7.80
 -12  -4   3   68.99    6.80
  12  -4  -3   49.10    7.40
  12  -4  -3   42.10    5.80
 -12  -4   3   62.79    7.70
 -12  -4   3   66.89    6.20
  12  -4  -3   53.29    8.40
 -12   4   3   54.79    7.30
  12   4  -3   63.69    9.00
 -12   4   3   57.19   10.30
  12   4  -3   55.99    6.80
  12   4  -3   66.49    6.40
 -12   4   3   58.29   10.00
 -12   4   3   60.29    6.10
  12   4  -3   57.19    7.60
  10  -4  -3   36.40    5.60
 -10  -4   3   55.59    6.30
  10  -4  -3   47.90    7.00
 -10  -4   3   58.69    7.00
  10  -4  -3   38.70    5.30
 -10  -4   3   53.79    5.50
  10  -4  -3   43.70    6.90
 -10  -4   3   53.39    7.30
 -10   4   3   54.29    9.40
 -10   4   3   49.10    9.20
  10   4  -3   50.59    6.80
  10   4  -3   48.40    6.50
 -10   4   3   50.49    5.90
  10   4  -3   50.79    8.40
 -10   4   3   61.19    6.50
  10   4  -3   53.89    5.60
   8  -4  -3 2128.29   58.99
  -8  -4   3 2175.18   56.49
  -8  -4   3 2065.79   54.59
   8  -4  -3 2107.29   58.89
  -8  -4   3 2127.09   56.69
   8  -4  -3 2074.09   57.09
  -8  -4   3 1992.00   54.59
  -8  -4   3 2174.18   57.59
   8  -4  -3 2059.09   55.79
   8  -4  -3 2105.79   54.99
   8   4  -3 1989.70   54.59
   8   4  -3 2179.98   56.69
  -8   4   3 2127.39   56.99
   8   4  -3 2160.98   55.89
  -8   4   3 2097.09   55.09
  -8   4   3 2023.10   60.29
  -8   4   3 2128.39   61.39
   8   4  -3 2171.58   58.89
   8   4  -3 2106.99   54.69
  -6  -4   3 1513.05   41.40
   6  -4  -3 1454.45   40.70
   6  -4  -3 1507.25   42.40
  -6  -4   3 1531.75   39.70
  -6  -4   3 1559.64   41.50
   6  -4  -3 1532.95   43.30
   6  -4  -3 1507.75   43.30
  -6  -4   3 1586.74   42.20
  -6  -4   3 1446.46   40.30
  -6   4   3 1457.35   41.90
  -6   4   3 1466.35   41.70
   6   4  -3 1531.55   40.10
  -6   4   3 1430.46   43.90
   6   4  -3 1543.15   41.80
   6   4  -3 1466.15   40.40
   6   4  -3 1579.24   39.70
   6   4  -3 1554.14   43.20
  -6   4   3 1521.05   45.80
  -4  -4   3 2909.91   75.99
   4  -4  -3 2906.11   76.99
   4  -4  -3 2998.20   77.19
  -4  -4   3 3066.59   74.79
  -4  -4   3 3086.09   76.79
  -4  -4   3 3091.39   76.69
   4  -4  -3 2891.31   75.29
  -4  -4   3 2978.90   76.19
   4   4  -3 3064.99   77.39
   4   4  -3 2950.60   76.19
   4   4  -3 3021.10   76.89
  -4   4   3 2844.32   76.79
  -4   4   3 2770.52   77.19
  -4   4   3 2831.22   77.09
  -4   4   3 2966.80   80.19
  -2  -4   3 2854.61   73.69
   2  -4  -3 2845.82   73.99
   2  -4  -3 2857.41   72.79
  -2  -4   3 2910.21   72.89
  -2  -4   3 2908.61   73.79
  -2  -4   3 2869.91   74.19
   2  -4  -3 2821.02   73.89
   2   4  -3 2927.81   73.79
  -2   4   3 2718.93   75.99
  -2   4   3 2785.72   74.49
   2   4  -3 2908.11   74.39
  -2   4   3 2855.81   73.59
  -2   4   3 2831.12   74.99
   2   4  -3 2897.31   74.09
   0  -4   3 2094.19   55.99
   0  -4   3 2146.69   56.39
   0  -4  -3 2113.59   56.09
   0  -4   3 2124.09   57.09
   0  -4   3 2074.99   56.29
   0  -4  -3 2174.58   56.29
   0  -4  -3 2192.28   55.49
   0   4  -3 2142.69   54.99
   0   4   3 2175.18   57.59
   0   4  -3 2095.79   56.29
   0   4  -3 2164.38   57.29
   0   4   3 2160.98   55.79
   0   4  -3 2012.50   55.99
   0   4   3 2181.28   57.39
   0   4   3 2096.19   56.99
   2  -4   3  744.33   23.70
   2  -4   3  741.13   22.50
   2  -4   3  743.23   23.40
  -2  -4  -3  728.43   21.10
  -2  -4  -3  738.23   22.40
  -2  -4  -3  733.83   21.90
   2  -4   3  719.03   23.00
   2   4   3  749.53   23.60
  -2   4  -3  723.53   22.10
   2   4   3  733.83   21.80
  -2   4  -3  770.72   23.90
   2   4   3  753.12   22.40
   2   4   3  733.73   22.30
   2   4   3  733.03   23.70
  -2   4  -3  732.53   23.00
  -4  -4  -3  121.19    7.00
  -4  -4  -3  121.89    7.40
   4  -4   3  123.79    9.10
   4  -4   3  132.39    8.60
  -4  -4  -3  125.29    7.20
   4  -4   3  125.89    9.10
   4  -4   3  136.19    7.90
  -4   4  -3  131.39    8.80
   4   4   3  109.69    8.30
   4   4   3  118.29    7.40
   4   4   3  124.99    8.40
  -4   4  -3  131.39    6.90
   4   4   3  107.39    7.40
  -4   4  -3  140.79    8.50
  -6  -4  -3  146.09    8.70
   6  -4   3  145.99   10.90
  -6  -4  -3  146.49    8.30
   6  -4   3  116.99   10.60
  -6  -4  -3  153.88    8.70
   6  -4   3  171.88    9.40
   6  -4   3  163.68   10.90
  -6   4  -3  158.88    7.40
  -6   4  -3  170.78   10.30
   6   4   3  127.89    8.90
   6   4   3  136.99    8.50
   6   4   3  124.49    8.60
   6   4   3  119.79    9.40
  -8  -4  -3  291.27   13.90
   8  -4   3  317.67   15.90
  -8  -4  -3  315.67   13.50
   8  -4   3  286.97   13.50
   8  -4   3  293.67   15.20
   8  -4   3  340.37   14.70
  -8  -4  -3  298.67   13.30
   8   4   3  257.67   13.10
  -8   4  -3  349.77   11.40
  -8   4  -3  352.36   15.60
   8   4   3  308.27   13.90
   8   4   3  275.77   13.00
   8   4   3  271.17   14.80
  -8   4  -3  321.67   14.40
  -8   4  -3  332.37   16.10
   8   4   3  293.17   13.20
 -10  -4  -3   95.29    8.60
  10  -4   3   89.19   11.30
  10  -4   3   72.19    9.50
  10  -4   3   82.19   10.70
  10  -4   3  108.89   10.10
 -10  -4  -3   84.19    9.30
 -10  -4  -3   77.49    8.80
 -10  -4  -3  106.59    8.80
  10   4   3   76.29    9.10
 -10   4  -3  104.19   10.70
  10   4   3   93.29    9.20
 -10   4  -3  101.59   11.30
  10   4   3   94.59   10.00
 -10   4  -3   85.89    9.70
  10   4   3   81.89    7.90
  10   4   3  100.09    9.00
  12  -4   3  333.67   18.00
 -12  -4  -3  327.37   17.20
  12  -4   3  328.97   17.50
  12  -4   3  292.37   16.60
 -12  -4  -3  331.57   15.80
 -12  -4  -3  333.47   15.90
 -12  -4  -3  300.77   16.40
  12  -4   3  328.37   18.90
 -12   4  -3  350.16   18.00
  12   4   3  311.27   16.20
 -12   4  -3  344.87   19.50
  12   4   3  310.77   16.40
 -12   4  -3  315.97   17.20
  12   4   3  304.77   17.50
  12   4   3  317.87   15.70
 -14  -4  -3   67.89   11.70
 -14  -4  -3   64.79   11.50
  14  -4   3   77.69   12.40
 -14  -4  -3   49.30    7.10
  14  -4   3   62.29    9.70
  14  -4   3   88.39   13.20
  14  -4   3   52.09    8.30
 -14  -4  -3   76.59   10.40
 -14   4  -3   48.10    8.10
 -14   4  -3   79.49   13.50
  14   4   3   72.59   11.80
  14   4   3   85.69   11.30
  14   4   3   67.09   11.70
  14   4   3   52.99    7.90
 -14   4  -3   90.19   12.20
  16  -4   3  483.85   24.70
  16  -4   3  506.45   25.70
  16  -4   3  484.15   26.80
 -16  -4  -3  531.25   25.70
  16  -4   3  463.95   25.30
 -16  -4  -3  558.34   25.50
 -16  -4  -3  523.75   24.00
 -16   4  -3  512.05   27.80
  16   4   3  518.25   25.20
  16   4   3  543.65   25.30
  16   4   3  557.64   26.70
  16   4   3  539.15   25.00
 -16   4  -3  495.25   24.40
 -16   4  -3  493.85   25.10
  18  -4   3  249.88   20.90
  18  -4   3  261.77   22.60
 -18  -4  -3  237.78   21.10
 -18  -4  -3  271.97   20.60
  18  -4   3  249.28   20.20
  18  -4   3  257.17   19.80
 -18  -4  -3  250.17   18.50
 -18   4  -3  263.17   19.40
 -18   4  -3  252.47   19.50
  18   4   3  282.77   20.60
  18   4   3  233.48   20.00
 -18   4  -3  258.27   22.20
  18   4   3  256.97   19.70
  18   4   3  256.97   20.70
  20  -4   3  460.75   28.60
 -20  -4  -3  444.76   24.70
 -20  -4  -3  482.75   27.00
  20  -4   3  388.36   25.70
  20  -4   3  453.95   27.00
 -20   4  -3  407.36   25.70
  20   4   3  425.86   26.20
  20   4   3  423.76   26.10
 -20   4  -3  409.56   28.20
  20   4   3  430.16   26.40
 -22  -4  -3   39.40    9.90
  22  -4   3   75.39   14.10
  22  -4   3   65.49   12.10
 -22  -4  -3   44.30   10.70
  22  -4   3   45.50   11.50
  22   4   3   55.59   11.60
 -22   4  -3   50.59   10.60
  22   4   3   46.20   11.10
  22   4   3   42.60   11.90
 -22   4  -3   51.19   12.70
 -22   4  -3   58.09   10.10
  24  -4   3   83.89   15.20
 -24  -4  -3  110.09   18.20
 -24  -4  -3   71.69   12.90
  24   4   3   62.59   14.10
  24   4   3   51.29   13.20
  24   4   3   67.89   13.30
 -24   4  -3   59.89   12.00
 -24   4  -3   61.89   13.90
 -24   4  -3  111.69   17.60
  27  -5  -3  333.67   29.50
 -27  -5   3  284.47   23.30
 -27  -5   3  285.97   30.50
  27  -5  -3  313.37   31.60
 -27   5   3  317.97   39.20
  27   5  -3  272.97   30.30
  25  -5  -3  467.85   34.60
 -25  -5   3  447.96   28.30
 -25  -5   3  437.26   24.60
  25  -5  -3  508.85   31.60
 -25  -5   3  441.26   24.60
  25   5  -3  486.95   26.30
  25   5  -3  424.46   29.30
 -25   5   3  452.85   37.40
  25   5  -3  474.25   29.20
 -25   5   3  474.05   33.10
 -23  -5   3  607.74   28.10
  23  -5  -3  651.43   36.90
 -23  -5   3  633.94   32.80
 -23  -5   3  591.44   31.50
  23  -5  -3  666.23   35.20
 -23  -5   3  597.14   27.10
  23   5  -3  683.93   29.00
 -23   5   3  626.34   36.50
  23   5  -3  625.44   33.00
 -23   5   3  641.14   32.10
 -23   5   3  650.73   29.80
  23   5  -3  657.33   31.10
  21  -5  -3  351.46   20.40
 -21  -5   3  301.57   22.10
  21  -5  -3  312.57   27.40
 -21  -5   3  305.17   18.00
 -21  -5   3  302.47   18.80
 -21  -5   3  307.37   22.00
  21  -5  -3  334.27   25.10
  21   5  -3  334.37   23.30
 -21   5   3  326.67   25.80
 -21   5   3  316.27   22.80
 -21   5   3  320.97   19.90
  21   5  -3  326.27   19.20
  21   5  -3  350.26   21.60
  19  -5  -3   28.80    9.90
 -19  -5   3   33.10    7.70
 -19  -5   3   25.40    8.30
  19  -5  -3   42.40    7.70
 -19  -5   3   34.50    7.10
 -19  -5   3   47.30    6.90
  19  -5  -3   49.50   12.30
 -19   5   3   30.10    8.90
  19   5  -3   41.00    9.10
 -19   5   3   32.60    7.30
  19   5  -3   43.30    8.50
  19   5  -3   45.00    7.20
 -19   5   3   32.30    8.40
  17  -5  -3    4.60    8.90
 -17  -5   3   -2.40    4.10
 -17  -5   3    0.40    5.30
  17  -5  -3   -6.50    7.30
  17  -5  -3   -6.60    4.90
 -17  -5   3   -2.30    3.50
 -17  -5   3   -6.10    3.70
 -17   5   3  -10.20    5.60
  17   5  -3   -9.80    4.90
 -17   5   3   -7.20    4.30
  17   5  -3   -0.40    4.20
  17   5  -3   -9.60    5.20
 -17   5   3   -5.80    5.20
 -15  -5   3  153.28   11.80
 -15  -5   3  142.79   10.60
  15  -5  -3  130.79   18.10
 -15  -5   3  148.09   12.20
  15  -5  -3  121.99   11.50
 -15  -5   3  133.99   10.00
  15  -5  -3  125.99   15.20
 -15   5   3  128.89   11.10
 -15   5   3  138.19    8.90
  15   5  -3  133.79   10.10
  15   5  -3  139.39   13.40
 -15   5   3  134.89   14.40
  15   5  -3  128.19   11.80
 -15   5   3  117.89   14.80
  15   5  -3  133.09   10.10
  13  -5  -3  475.45   22.60
  13  -5  -3  452.75   18.60
  13  -5  -3  470.15   23.60
 -13  -5   3  486.85   18.60
 -13  -5   3  482.15   20.20
  13  -5  -3  450.15   18.80
 -13  -5   3  501.45   19.30
 -13  -5   3  459.55   17.20
  13   5  -3  463.65   17.40
 -13   5   3  468.85   18.30
  13   5  -3  478.55   18.10
 -13   5   3  468.35   23.50
 -13   5   3  459.15   17.10
  13   5  -3  482.05   21.30
  13   5  -3  474.95   18.90
 -13   5   3  462.45   22.80
  11  -5  -3    1.20    4.60
  11  -5  -3    0.00    3.60
 -11  -5   3    2.90    2.90
 -11  -5   3    4.30    2.60
 -11  -5   3    4.00    2.80
  11  -5  -3    7.10    2.70
 -11  -5   3    7.50    3.40
  11  -5  -3    3.30    3.30
  11  -5  -3   -3.00    4.60
 -11   5   3    7.60    3.00
 -11   5   3    4.20    3.90
 -11   5   3    6.10    2.60
  11   5  -3    6.50    2.80
  11   5  -3    6.50    3.90
  11   5  -3    4.50    3.10
 -11   5   3    4.70    2.80
 -11   5   3    3.40    4.10
  11   5  -3    3.50    2.80
  -9  -5   3  311.37   13.30
   9  -5  -3  330.27   12.10
  -9  -5   3  311.47   14.20
   9  -5  -3  320.27   13.90
  -9  -5   3  305.77   12.00
   9  -5  -3  316.87   15.90
  -9  -5   3  289.47   13.20
   9  -5  -3  315.57   16.30
   9  -5  -3  317.07   13.50
  -9   5   3  321.07   13.50
  -9   5   3  304.87   17.20
   9   5  -3  318.27   12.90
   9   5  -3  301.97   14.90
   9   5  -3  311.47   11.40
   9   5  -3  311.97   13.50
  -9   5   3  322.17   17.10
   9   5  -3  318.67   12.10
  -9   5   3  330.97   13.50
  -9   5   3  312.57   12.00
   7  -5  -3 2890.71   78.29
  -7  -5   3 2912.21   75.99
  -7  -5   3 3013.30   76.79
  -7  -5   3 3070.79   77.39
   7  -5  -3 2800.02   76.99
  -7  -5   3 2944.71   74.79
   7  -5  -3 2937.11   78.99
   7  -5  -3 2780.32   75.79
  -7   5   3 2783.72   81.39
   7   5  -3 2892.21   75.29
   7   5  -3 3018.40   74.69
   7   5  -3 2954.10   78.39
   7   5  -3 3020.60   77.19
  -7   5   3 2812.92   76.89
  -7   5   3 2825.12   79.69
   7   5  -3 2971.70   75.09
  -7   5   3 2835.12   76.49
  -5  -5   3 4672.23  116.49
   5  -5  -3 4633.84  119.09
  -5  -5   3 4764.72  118.49
   5  -5  -3 4501.85  117.19
  -5  -5   3 4810.32  118.49
  -5  -5   3 4645.33  117.49
   5  -5  -3 4650.94  119.59
   5   5  -3 4642.44  117.79
  -5   5   3 4505.05  119.09
   5   5  -3 4722.93  119.29
   5   5  -3 4704.63  115.99
  -5   5   3 4495.45  118.29
  -5   5   3 4630.44  123.09
  -5   5   3 4375.76  119.69
   5   5  -3 4751.32  118.79
  -3  -5   3 5697.43  139.49
  -3  -5   3 5527.25  139.89
   3  -5  -3 5415.96  140.99
  -3  -5   3 5736.13  140.59
   3  -5  -3 5429.46  140.69
   3  -5  -3 5438.06  139.49
  -3  -5   3 5655.53  141.09
  -3   5   3 5610.14  140.39
  -3   5   3 5336.27  140.99
   3   5  -3 5708.03  141.19
   3   5  -3 5653.43  140.69
  -3   5   3 5339.67  141.69
  -3   5   3 5569.74  144.69
   3   5  -3 5727.43  141.09
   1  -5  -3 3984.60  102.39
   1  -5  -3 4102.29  102.89
  -1  -5   3 4050.39  102.29
  -1  -5   3 3990.20  102.09
  -1  -5   3 4034.10  103.39
  -1  -5   3 3981.40  102.19
   1  -5  -3 3895.61  101.49
   1   5  -3 3970.80  102.19
  -1   5   3 3893.41  103.39
   1   5  -3 4137.49  103.59
   1   5  -3 4024.20  101.59
  -1   5   3 4017.30  105.19
  -1   5   3 3980.20  101.89
   1   5  -3 3907.61  102.49
  -1  -5  -3 3414.66   89.39
   1  -5   3 3491.75   90.99
  -1  -5  -3 3488.25   87.69
  -1  -5  -3 3452.15   90.09
  -1  -5  -3 3590.54   90.29
   1  -5   3 3436.66   90.29
   1  -5   3 3560.94   91.69
   1  -5   3 3452.85   89.89
  -1   5  -3 3577.04   91.79
   1   5   3 3390.46   90.99
   1   5   3 3564.34   89.79
  -1   5  -3 3485.75   89.99
  -1   5  -3 3420.36   90.29
  -1   5  -3 3502.65   88.19
   1   5   3 3439.06   91.69
   1   5   3 3555.94   91.79
   3  -5   3   80.39    6.30
   3  -5   3   73.09    6.90
   3  -5   3   65.79    7.80
  -3  -5  -3   65.59    5.30
  -3  -5  -3   69.49    6.10
   3  -5   3   53.99    7.70
  -3  -5  -3   45.20    6.50
   3   5   3   60.09    5.50
  -3   5  -3   71.09    6.80
   3   5   3   53.89    6.20
   3   5   3   61.19    7.00
   3   5   3   58.39    7.20
  -3   5  -3   68.29    5.80
  -3   5  -3   75.09    7.50
   3   5   3   50.19    6.30
  -5  -5  -3   45.70    5.70
   5  -5   3   37.60    5.70
   5  -5   3   32.00    5.60
   5  -5   3   36.10    6.60
  -5  -5  -3   35.50    5.90
   5  -5   3   28.60    5.10
  -5   5  -3   30.00    5.00
  -5   5  -3   20.90    4.40
   5   5   3   26.30    4.10
   5   5   3   46.90    6.10
  -5   5  -3   22.90    4.20
   5   5   3   40.50    6.90
   5   5   3   39.20    6.70
  -7  -5  -3  231.08   11.30
  -7  -5  -3  237.78   11.50
   7  -5   3  204.48   13.00
  -7  -5  -3  222.88   11.30
   7  -5   3  201.68   11.30
   7  -5   3  212.28   14.00
   7   5   3  234.08   11.50
  -7   5  -3  208.98   11.50
  -7   5  -3  200.38   12.60
   7   5   3  239.68   13.20
  -7   5  -3  208.88   12.80
   7   5   3  237.28   12.30
  -7   5  -3  200.48    9.60
   7   5   3  228.48   11.60
   9  -5   3   27.70    6.60
  -9  -5  -3   29.70    4.80
   9  -5   3   24.00    5.60
   9  -5   3   28.10    5.30
  -9  -5  -3   30.70    4.80
  -9  -5  -3   33.20    5.90
   9  -5   3   25.70    4.90
  -9  -5  -3   27.30    4.80
  -9   5  -3   39.50    5.20
  -9   5  -3   19.90    5.00
  -9   5  -3   25.70    5.30
   9   5   3   28.50    4.90
   9   5   3   30.80    4.90
  -9   5  -3   29.00    5.30
   9   5   3   28.60    4.60
   9   5   3   29.10    5.60
 -11  -5  -3   -2.70    3.60
  11  -5   3   -1.50    3.90
  11  -5   3   -9.40    5.40
  11  -5   3   -4.30    4.30
 -11  -5  -3   -4.50    3.40
 -11  -5  -3   -2.40    3.10
  11  -5   3   -1.10    4.90
 -11  -5  -3    3.90    3.70
 -11   5  -3    5.60    4.30
  11   5   3   -1.90    3.50
 -11   5  -3   -0.70    4.10
  11   5   3   -3.60    3.80
  11   5   3    0.70    3.20
 -11   5  -3    1.30    2.20
  11   5   3   -0.50    3.80
 -13  -5  -3   80.39   11.90
 -13  -5  -3   77.29   11.10
  13  -5   3  113.89   12.00
  13  -5   3   93.59   12.10
 -13  -5  -3  106.49   11.10
 -13  -5  -3   92.99   11.60
  13  -5   3   91.89   14.70
  13  -5   3  109.59   13.60
  13   5   3   91.09   11.00
 -13   5  -3  104.59   13.80
  13   5   3   94.89   11.90
 -13   5  -3  102.49   12.70
 -13   5  -3  100.19   11.80
  13   5   3  109.89   12.70
  15  -5   3  599.74   27.70
 -15  -5  -3  596.04   27.10
  15  -5   3  607.04   26.90
 -15  -5  -3  584.64   25.50
 -15  -5  -3  599.74   25.70
  15  -5   3  564.64   26.50
  15  -5   3  572.64   29.60
 -15   5  -3  600.04   26.40
  15   5   3  598.44   25.80
  15   5   3  592.84   26.40
  15   5   3  636.04   28.70
 -15   5  -3  601.14   29.40
 -15   5  -3  592.34   27.30
  17  -5   3  915.41   36.50
 -17  -5  -3  839.82   33.10
 -17  -5  -3  875.21   33.60
  17  -5   3  845.52   37.10
  17  -5   3  820.12   34.50
  17  -5   3  860.11   35.60
 -17  -5  -3  835.62   34.90
 -17   5  -3  887.11   35.10
 -17   5  -3  887.61   35.60
  17   5   3  835.12   34.20
  17   5   3  889.71   37.30
 -17   5  -3  843.12   37.90
  17   5   3  884.21   33.90
  19  -5   3  979.90   42.90
  19  -5   3 1133.29   42.40
 -19  -5  -3  947.01   37.60
 -19  -5  -3  987.50   39.70
 -19  -5  -3  991.40   38.00
  19  -5   3  991.90   40.90
  19  -5   3  933.31   43.50
  19   5   3  994.70   42.90
 -19   5  -3  981.90   43.50
  19   5   3 1021.80   38.90
 -19   5  -3  980.60   39.50
  19   5   3  961.10   39.30
 -19   5  -3 1022.20   39.50
 -21  -5  -3  335.97   22.90
 -21  -5  -3  367.16   24.60
 -21  -5  -3  324.37   22.50
[truncated: 1,494,708 more chars]
