# Supplementary material
Source: publisher figshare collection journal article supplement (https://acs.figshare.com/ndownloader/files/22494656)
Supplement: Supplementary file 1 [file 22494656 › CIF/1U.cif]

data_1u
_audit_creation_date               2019-03-15
_audit_creation_method
;
Olex2 1.2
(compiled 2018.05.29 svn.r3508 for OlexSys, GUI svn.r5506)
;
_shelx_SHELXL_version_number       '2016/6'
_audit_contact_author_address      ?
_audit_contact_author_email        ?
_audit_contact_author_name         ''
_audit_contact_author_phone        ?
_publ_contact_author_id_orcid      ?
_publ_section_references
;
Dolomanov, O.V., Bourhis, L.J., Gildea, R.J, Howard, J.A.K. & Puschmann, H.
 (2009), J. Appl. Cryst. 42, 339-341.

Sheldrick, G.M. (2008). Acta Cryst. A64, 112-122.
;
_chemical_name_common              ?
_chemical_name_systematic
;
 ? 
;
_chemical_formula_moiety           'C7 H7, C22 H17 Cu I N3 O'
_chemical_formula_sum              'C29 H24 Cu I N3 O'
_chemical_formula_weight           620.95
_chemical_melting_point            ?
loop_
  _atom_type_symbol
  _atom_type_description
  _atom_type_scat_dispersion_real
  _atom_type_scat_dispersion_imag
  _atom_type_scat_source
 'C' 'C' 0.0033 0.0016 'International Tables Vol C Tables 4.2.6.8 and 6.1.1.4'
 'H' 'H' 0.0000 0.0000 'International Tables Vol C Tables 4.2.6.8 and 6.1.1.4'
 'Cu' 'Cu' 0.3201 1.2651 'International Tables Vol C Tables 4.2.6.8 and 6.1.1.4'
 'I' 'I' -0.4742 1.8119 'International Tables Vol C Tables 4.2.6.8 and 6.1.1.4'
 'N' 'N' 0.0061 0.0033 'International Tables Vol C Tables 4.2.6.8 and 6.1.1.4'
 'O' 'O' 0.0106 0.0060 'International Tables Vol C Tables 4.2.6.8 and 6.1.1.4'

_shelx_space_group_comment
;
The symmetry employed for this shelxl refinement is uniquely defined
by the following loop, which should always be used as a source of
symmetry information in preference to the above space-group names.
They are only intended as comments.
;
_space_group_crystal_system        'monoclinic'
_space_group_IT_number             15
_space_group_name_H-M_alt          'C 1 2/c 1'
_space_group_name_Hall             '-C 2yc'
loop_
  _space_group_symop_operation_xyz
 'x, y, z'
 '-x, y, -z+1/2'
 'x+1/2, y+1/2, z'
 '-x+1/2, y+1/2, -z+1/2'
 '-x, -y, -z'
 'x, -y, z-1/2'
 '-x+1/2, -y+1/2, -z'
 'x+1/2, -y+1/2, z-1/2'

_cell_length_a                     23.8568(9)
_cell_length_b                     12.7232(5)
_cell_length_c                     17.6759(7)
_cell_angle_alpha                  90
_cell_angle_beta                   112.562(2)
_cell_angle_gamma                  90
_cell_volume                       4954.6(3)
_cell_formula_units_Z              8
_cell_measurement_reflns_used      104
_cell_measurement_temperature      100(2)
_cell_measurement_theta_max        27.58
_cell_measurement_theta_min        2.28
_shelx_estimated_absorpt_T_max     ?
_shelx_estimated_absorpt_T_min     ?
_exptl_absorpt_coefficient_mu      2.156
_exptl_absorpt_correction_T_max    0.772
_exptl_absorpt_correction_T_min    0.685
_exptl_absorpt_correction_type     multi-scan
_exptl_absorpt_process_details     '(SADABS; Bruker, 2000)'
_exptl_absorpt_special_details     ?
_exptl_crystal_colour              'clear dark yellow'
_exptl_crystal_colour_lustre       clear
_exptl_crystal_colour_modifier     dark
_exptl_crystal_colour_primary      yellow
_exptl_crystal_density_diffrn      1.665
_exptl_crystal_density_meas        ?
_exptl_crystal_density_method      'not measured'
_exptl_crystal_description         block
_exptl_crystal_F_000               2472
_exptl_crystal_size_max            0.18
_exptl_crystal_size_mid            0.15
_exptl_crystal_size_min            0.12
_exptl_special_details
;
 ? 
;
_exptl_transmission_factor_max     ?
_exptl_transmission_factor_min     ?
_diffrn_reflns_av_R_equivalents    0.064
_diffrn_reflns_av_unetI/netI       0.0414
_diffrn_reflns_Laue_measured_fraction_full  0.998
_diffrn_reflns_Laue_measured_fraction_max  0.992
_diffrn_reflns_limit_h_max         ?
_diffrn_reflns_limit_h_min         ?
_diffrn_reflns_limit_k_max         ?
_diffrn_reflns_limit_k_min         ?
_diffrn_reflns_limit_l_max         ?
_diffrn_reflns_limit_l_min         ?
_diffrn_reflns_number              6150
_diffrn_reflns_point_group_measured_fraction_full  0.998
_diffrn_reflns_point_group_measured_fraction_max  0.992
_diffrn_reflns_theta_full          25.242
_diffrn_reflns_theta_max           28.377
_diffrn_reflns_theta_min           1.848
_diffrn_ambient_temperature        100.0
_diffrn_detector_area_resol_mean   ?
_diffrn_measured_fraction_theta_full  0.998
_diffrn_measured_fraction_theta_max  0.992
_diffrn_measurement_device_type    'CCD area detector'
_diffrn_measurement_method         'phi omega scans'
_diffrn_radiation_type             MoK\a
_diffrn_radiation_wavelength       0.71073
_diffrn_source                     ?
_reflns_Friedel_coverage           0.000
_reflns_Friedel_fraction_full      .
_reflns_Friedel_fraction_max       .
_reflns_number_gt                  4691
_reflns_number_total               6150
_reflns_special_details
;
 Reflections were merged by SHELXL according to the crystal
 class for the calculation of statistics and refinement.
 
 _reflns_Friedel_fraction is defined as the number of unique
 Friedel pairs measured divided by the number that would be
 possible theoretically, ignoring centric projections and
 systematic absences.
;
_reflns_threshold_expression       'I > 2\s(I)'
_computing_cell_refinement         'Bruker Kappa Apex'
_computing_data_collection         'Bruker Kappa Apex'
_computing_data_reduction          'Bruker SAINT'
_computing_molecular_graphics      'Olex2 (Dolomanov et al., 2009)'
_computing_publication_material    'Olex2 (Dolomanov et al., 2009)'
_computing_structure_refinement    'XL (Sheldrick, 2008)'
_computing_structure_solution      'ShelXS (Sheldrick, 2008)'
_refine_diff_density_max           1.152
_refine_diff_density_min           -1.036
_refine_diff_density_rms           0.133
_refine_ls_extinction_coef         .
_refine_ls_extinction_method       none
_refine_ls_goodness_of_fit_ref     1.074
_refine_ls_hydrogen_treatment      constr
_refine_ls_matrix_type             full
_refine_ls_number_parameters       296
_refine_ls_number_reflns           6150
_refine_ls_number_restraints       1
_refine_ls_R_factor_all            0.0633
_refine_ls_R_factor_gt             0.0457
_refine_ls_restrained_S_all        1.074
_refine_ls_shift/su_max            0.002
_refine_ls_shift/su_mean           0.000
_refine_ls_structure_factor_coef   Fsqd
_refine_ls_weighting_details      
 'w=1/[\s^2^(Fo^2^)+(0.0695P)^2^+11.3016P] where P=(Fo^2^+2Fc^2^)/3'
_refine_ls_weighting_scheme        calc
_refine_ls_wR_factor_gt            0.1227
_refine_ls_wR_factor_ref           0.1341
_refine_special_details            ?
_olex2_refinement_description
;
1. Fixed Uiso
 At 1.2 times of:
  All C(H) groups
 At 1.5 times of:
  All C(H,H,H) groups
2. Restrained distances
 C26-C30
 1.5 with sigma of 0.02
3.a Aromatic/amide H refined with riding coordinates:
 C24(H24), C25(H25), C27(H27), C29(H29), C9(H9), C12(H12), C22(H22), C16(H16),
 C14(H14), C17(H17), C15(H15), C20(H20), C2(H2), C21(H21), C19(H19), C3(H3),
 C6(H6), C5(H5)
3.b Fitted hexagon refined as free rotating group:
 C24(C25,C26,C27,C29,C28)
3.c Idealised Me refined as rotating group:
 C7(H7A,H7B,H7C), C30(H30A,H30B,H30C)
;
_atom_sites_solution_hydrogens     geom
_atom_sites_solution_primary       direct
_atom_sites_solution_secondary     ?
loop_
  _atom_site_label
  _atom_site_type_symbol
  _atom_site_fract_x
  _atom_site_fract_y
  _atom_site_fract_z
  _atom_site_U_iso_or_equiv
  _atom_site_adp_type
  _atom_site_occupancy
  _atom_site_site_symmetry_order
  _atom_site_calc_flag
  _atom_site_refinement_flags_posn
  _atom_site_refinement_flags_adp
  _atom_site_refinement_flags_occupancy
  _atom_site_disorder_assembly
  _atom_site_disorder_group
 C24 C 0.4552(4) 0.5837(7) 0.8019(5) 0.148(5) Uani 1 1 d . . . . .
 H24 H 0.462272 0.640924 0.772183 0.177 Uiso 1 1 calc R . . . .
 C25 C 0.4348(3) 0.6023(4) 0.8645(5) 0.137(5) Uani 1 1 d G . . . .
 H25 H 0.427927 0.672250 0.877623 0.164 Uiso 1 1 calc R . . . .
 C26 C 0.4244(3) 0.5185(6) 0.9079(4) 0.095(3) Uani 1 1 d DG . . . .
 C27 C 0.4345(5) 0.4161(5) 0.8887(6) 0.170(6) Uani 1 1 d G . . . .
 H27 H 0.427377 0.358845 0.918380 0.204 Uiso 1 1 calc R . . . .
 C29 C 0.4549(7) 0.3975(6) 0.8261(7) 0.407(19) Uiso 1 1 d G . . . .
 H29 H 0.461721 0.327517 0.812940 0.489 Uiso 1 1 calc R . . . .
 C28 C 0.4652(6) 0.4813(9) 0.7826(6) 0.50(3) Uiso 1 1 d G . . . .
 I1 I 0.45709(2) 1.14472(2) 0.53686(2) 0.03504(11) Uani 1 1 d . . . . .
 Cu1 Cu 0.50188(2) 0.95179(4) 0.56551(3) 0.03026(14) Uani 1 1 d . . . . .
 N1 N 0.43087(15) 0.8573(3) 0.5551(2) 0.0291(7) Uani 1 1 d . . . . .
 N2 N 0.07040(15) 0.5483(3) 0.1773(2) 0.0310(7) Uani 1 1 d . . . . .
 N3 N 0.25376(15) 0.6132(3) 0.4356(2) 0.0281(7) Uani 1 1 d . . . . .
 O1 O 0.2913(2) 0.1220(3) 0.7743(2) 0.0603(11) Uani 1 1 d . . . . .
 C13 C 0.16279(17) 0.5407(3) 0.3342(2) 0.0279(8) Uani 1 1 d . . . . .
 C9 C 0.21882(19) 0.4483(3) 0.4670(2) 0.0285(8) Uani 1 1 d . . . . .
 H9 H 0.189980 0.392871 0.449843 0.034 Uiso 1 1 calc R . . . .
 C10 C 0.21340(18) 0.5336(3) 0.4160(2) 0.0278(8) Uani 1 1 d . . . . .
 C8 C 0.26663(19) 0.4435(3) 0.5437(2) 0.0295(8) Uani 1 1 d . . . . .
 C12 C 0.30716(19) 0.5280(3) 0.5641(2) 0.0304(9) Uani 1 1 d . . . . .
 H12 H 0.339833 0.529715 0.616117 0.036 Uiso 1 1 calc R . . . .
 C22 C 0.3396(2) 0.7718(4) 0.4681(3) 0.0357(10) Uani 1 1 d . . . . .
 H22 H 0.306636 0.769445 0.416425 0.043 Uiso 1 1 calc R . . . .
 C11 C 0.30004(18) 0.6091(3) 0.5093(2) 0.0283(8) Uani 1 1 d . . . . .
 C18 C 0.34390(18) 0.6970(3) 0.5269(2) 0.0283(8) Uani 1 1 d . . . . .
 C16 C 0.0688(2) 0.4806(4) 0.2341(3) 0.0392(11) Uani 1 1 d . . . . .
 H16 H 0.035500 0.433433 0.219840 0.047 Uiso 1 1 calc R . . . .
 C14 C 0.1648(2) 0.6127(4) 0.2758(3) 0.0330(9) Uani 1 1 d . . . . .
 H14 H 0.197711 0.660399 0.288214 0.040 Uiso 1 1 calc R . . . .
 C17 C 0.1129(2) 0.4752(4) 0.3123(3) 0.0397(11) Uani 1 1 d . . . . .
 H17 H 0.108857 0.426846 0.350884 0.048 Uiso 1 1 calc R . . . .
 C15 C 0.1180(2) 0.6134(4) 0.1994(3) 0.0347(9) Uani 1 1 d . . . . .
 H15 H 0.119765 0.663134 0.160318 0.042 Uiso 1 1 calc R . . . .
 C20 C 0.4339(2) 0.7874(4) 0.6125(3) 0.0438(12) Uani 1 1 d . . . . .
 H20 H 0.466716 0.792506 0.664130 0.053 Uiso 1 1 calc R . . . .
 C1 C 0.2726(2) 0.3555(3) 0.6005(2) 0.0320(9) Uani 1 1 d . . . . .
 C2 C 0.2232(2) 0.2956(3) 0.5962(3) 0.0357(10) Uani 1 1 d . . . . .
 H2 H 0.185070 0.308736 0.553075 0.043 Uiso 1 1 calc R . . . .
 C21 C 0.3827(2) 0.8494(4) 0.4840(3) 0.0375(10) Uani 1 1 d . . . . .
 H21 H 0.378140 0.900002 0.442565 0.045 Uiso 1 1 calc R . . . .
 C19 C 0.3923(2) 0.7080(4) 0.6014(3) 0.0476(13) Uani 1 1 d . . . . .
 H19 H 0.396841 0.660701 0.644924 0.057 Uiso 1 1 calc R . . . .
 C4 C 0.2823(3) 0.1968(4) 0.7148(3) 0.0440(12) Uani 1 1 d . . . . .
 C3 C 0.2270(2) 0.2172(4) 0.6521(3) 0.0420(11) Uani 1 1 d . . . . .
 H3 H 0.192024 0.177758 0.647492 0.050 Uiso 1 1 calc R . . . .
 C6 C 0.3285(3) 0.3318(4) 0.6636(3) 0.0521(14) Uani 1 1 d . . . . .
 H6 H 0.363693 0.370471 0.667888 0.062 Uiso 1 1 calc R . . . .
 C5 C 0.3332(3) 0.2533(4) 0.7194(3) 0.0567(16) Uani 1 1 d . . . . .
 H5 H 0.371455 0.237806 0.761328 0.068 Uiso 1 1 calc R . . . .
 C7 C 0.2412(3) 0.0572(5) 0.7672(4) 0.075(2) Uani 1 1 d . . . . .
 H7A H 0.208854 0.100398 0.772549 0.112 Uiso 1 1 calc GR . . . .
 H7B H 0.253971 0.003941 0.810549 0.112 Uiso 1 1 calc GR . . . .
 H7C H 0.225998 0.022566 0.713590 0.112 Uiso 1 1 calc GR . . . .
 C30 C 0.4133(9) 0.5476(14) 0.9792(10) 0.242(10) Uani 1 1 d D . . . .
 H30A H 0.370460 0.535653 0.969175 0.363 Uiso 1 1 calc GR . . . .
 H30B H 0.423066 0.622097 0.991293 0.363 Uiso 1 1 calc GR . . . .
 H30C H 0.438789 0.504926 1.025889 0.363 Uiso 1 1 calc GR . . . .

loop_
  _atom_site_aniso_label
  _atom_site_aniso_U_11
  _atom_site_aniso_U_22
  _atom_site_aniso_U_33
  _atom_site_aniso_U_23
  _atom_site_aniso_U_13
  _atom_site_aniso_U_12
 C24 0.202(12) 0.179(12) 0.072(6) -0.026(7) 0.063(7) -0.100(10)
 C25 0.085(6) 0.048(5) 0.231(14) 0.031(7) 0.010(8) 0.016(4)
 C26 0.072(5) 0.122(8) 0.084(5) -0.034(5) 0.021(4) -0.009(5)
 C27 0.34(2) 0.078(7) 0.127(9) -0.026(6) 0.122(12) -0.072(10)
 I1 0.03990(18) 0.03263(18) 0.03914(17) 0.00244(11) 0.02246(13) 0.00469(11)
 Cu1 0.0281(3) 0.0333(3) 0.0278(2) 0.0002(2) 0.0090(2) -0.0033(2)
 N1 0.0266(17) 0.0316(19) 0.0286(16) 0.0000(14) 0.0100(14) -0.0034(14)
 N2 0.0271(17) 0.035(2) 0.0296(16) 0.0048(14) 0.0096(14) 0.0037(15)
 N3 0.0291(18) 0.0304(18) 0.0248(15) 0.0007(13) 0.0102(14) 0.0007(14)
 O1 0.110(4) 0.038(2) 0.0352(17) 0.0121(15) 0.031(2) 0.009(2)
 C13 0.0250(19) 0.034(2) 0.0237(17) -0.0018(16) 0.0086(15) 0.0006(17)
 C9 0.034(2) 0.024(2) 0.0292(18) -0.0048(15) 0.0141(17) -0.0033(16)
 C10 0.028(2) 0.031(2) 0.0255(18) -0.0012(16) 0.0114(16) 0.0004(16)
 C8 0.035(2) 0.031(2) 0.0251(18) -0.0001(15) 0.0141(16) 0.0012(17)
 C12 0.032(2) 0.032(2) 0.0244(18) 0.0005(16) 0.0075(16) -0.0029(17)
 C22 0.030(2) 0.044(3) 0.0277(19) 0.0057(18) 0.0051(17) -0.0073(19)
 C11 0.028(2) 0.029(2) 0.0270(18) -0.0022(16) 0.0094(16) 0.0018(16)
 C18 0.029(2) 0.029(2) 0.0277(18) 0.0028(16) 0.0125(16) -0.0007(16)
 C16 0.027(2) 0.054(3) 0.033(2) 0.008(2) 0.0083(18) -0.010(2)
 C14 0.034(2) 0.031(2) 0.031(2) 0.0019(17) 0.0080(18) -0.0060(18)
 C17 0.033(2) 0.056(3) 0.030(2) 0.011(2) 0.0115(18) -0.008(2)
 C15 0.037(2) 0.030(2) 0.033(2) 0.0078(17) 0.0081(18) -0.0013(18)
 C20 0.047(3) 0.051(3) 0.0240(19) 0.0076(19) 0.0028(19) -0.016(2)
 C1 0.041(2) 0.027(2) 0.0261(18) -0.0004(16) 0.0108(17) 0.0051(17)
 C2 0.044(3) 0.029(2) 0.039(2) 0.0037(18) 0.021(2) 0.0053(19)
 C21 0.036(2) 0.039(3) 0.036(2) 0.0113(19) 0.0113(19) -0.0032(19)
 C19 0.054(3) 0.049(3) 0.028(2) 0.010(2) 0.004(2) -0.016(2)
 C4 0.081(4) 0.025(2) 0.032(2) 0.0048(18) 0.028(2) 0.007(2)
 C3 0.053(3) 0.036(3) 0.050(3) 0.007(2) 0.034(2) 0.010(2)
 C6 0.054(3) 0.038(3) 0.046(3) 0.007(2) -0.001(2) -0.015(2)
 C5 0.070(4) 0.038(3) 0.037(2) 0.005(2) -0.007(2) -0.007(3)
 C7 0.106(5) 0.062(4) 0.093(5) 0.045(4) 0.078(4) 0.034(4)
 C30 0.28(2) 0.28(2) 0.203(18) 0.056(17) 0.136(17) -0.067(19)

_geom_special_details
;
 All esds (except the esd in the dihedral angle between two l.s. planes)
 are estimated using the full covariance matrix.  The cell esds are taken
 into account individually in the estimation of esds in distances, angles
 and torsion angles; correlations between esds in cell parameters are only
 used when they are defined by crystal symmetry.  An approximate (isotropic)
 treatment of cell esds is used for estimating esds involving l.s. planes.
;
loop_
  _geom_bond_atom_site_label_1
  _geom_bond_atom_site_label_2
  _geom_bond_distance
  _geom_bond_site_symmetry_2
  _geom_bond_publ_flag
 C24 H24 0.9500 . ?
 C24 C25 1.3900 . ?
 C24 C28 1.3900 . ?
 C25 H25 0.9500 . ?
 C25 C26 1.3900 . ?
 C26 C27 1.3900 . ?
 C26 C30 1.432(14) . ?
 C27 H27 0.9500 . ?
 C27 C29 1.3900 . ?
 C29 H29 0.9500 . ?
 C29 C28 1.3900 . ?
 I1 Cu1 2.6644(6) 5_676 ?
 I1 Cu1 2.6473(6) . ?
 Cu1 Cu1 2.5918(10) 5_676 ?
 Cu1 N1 2.028(3) . ?
 Cu1 N2 2.024(3) 8_566 ?
 N1 C20 1.329(5) . ?
 N1 C21 1.343(6) . ?
 N2 C16 1.334(6) . ?
 N2 C15 1.337(5) . ?
 N3 C10 1.347(5) . ?
 N3 C11 1.347(5) . ?
 O1 C4 1.373(5) . ?
 O1 C7 1.418(8) . ?
 C13 C10 1.488(5) . ?
 C13 C14 1.395(6) . ?
 C13 C17 1.381(6) . ?
 C9 H9 0.9500 . ?
 C9 C10 1.386(6) . ?
 C9 C8 1.399(5) . ?
 C8 C12 1.398(6) . ?
 C8 C1 1.474(6) . ?
 C12 H12 0.9500 . ?
 C12 C11 1.381(6) . ?
 C22 H22 0.9500 . ?
 C22 C18 1.383(6) . ?
 C22 C21 1.375(6) . ?
 C11 C18 1.480(6) . ?
 C18 C19 1.387(6) . ?
 C16 H16 0.9500 . ?
 C16 C17 1.381(6) . ?
 C14 H14 0.9500 . ?
 C14 C15 1.382(6) . ?
 C17 H17 0.9500 . ?
 C15 H15 0.9500 . ?
 C20 H20 0.9500 . ?
 C20 C19 1.375(7) . ?
 C1 C2 1.382(6) . ?
 C1 C6 1.404(7) . ?
 C2 H2 0.9500 . ?
 C2 C3 1.382(6) . ?
 C21 H21 0.9500 . ?
 C19 H19 0.9500 . ?
 C4 C3 1.383(7) . ?
 C4 C5 1.386(8) . ?
 C3 H3 0.9500 . ?
 C6 H6 0.9500 . ?
 C6 C5 1.378(7) . ?
 C5 H5 0.9500 . ?
 C7 H7A 0.9800 . ?
 C7 H7B 0.9800 . ?
 C7 H7C 0.9800 . ?
 C30 H30A 0.9800 . ?
 C30 H30B 0.9800 . ?
 C30 H30C 0.9800 . ?

loop_
  _geom_angle_atom_site_label_1
  _geom_angle_atom_site_label_2
  _geom_angle_atom_site_label_3
  _geom_angle
  _geom_angle_site_symmetry_1
  _geom_angle_site_symmetry_3
  _geom_angle_publ_flag
 C25 C24 H24 120.0 . . ?
 C25 C24 C28 120.0 . . ?
 C28 C24 H24 120.0 . . ?
 C24 C25 H25 120.0 . . ?
 C26 C25 C24 120.0 . . ?
 C26 C25 H25 120.0 . . ?
 C25 C26 C27 120.0 . . ?
 C25 C26 C30 114.8(9) . . ?
 C27 C26 C30 124.4(9) . . ?
 C26 C27 H27 120.0 . . ?
 C29 C27 C26 120.0 . . ?
 C29 C27 H27 120.0 . . ?
 C27 C29 H29 120.0 . . ?
 C28 C29 C27 120.0 . . ?
 C28 C29 H29 120.0 . . ?
 C29 C28 C24 120.0 . . ?
 Cu1 I1 Cu1 58.41(2) . 5_676 ?
 I1 Cu1 I1 121.59(2) . 5_676 ?
 Cu1 Cu1 I1 60.47(2) 5_676 5_676 ?
 Cu1 Cu1 I1 61.13(2) 5_676 . ?
 N1 Cu1 I1 100.20(10) . 5_676 ?
 N1 Cu1 I1 105.70(10) . . ?
 N1 Cu1 Cu1 117.30(10) . 5_676 ?
 N2 Cu1 I1 107.62(10) 8_566 . ?
 N2 Cu1 I1 107.04(10) 8_566 5_676 ?
 N2 Cu1 Cu1 127.62(10) 8_566 5_676 ?
 N2 Cu1 N1 114.95(14) 8_566 . ?
 C20 N1 Cu1 121.9(3) . . ?
 C20 N1 C21 116.1(4) . . ?
 C21 N1 Cu1 121.0(3) . . ?
 C16 N2 Cu1 119.3(3) . 8_465 ?
 C16 N2 C15 116.5(4) . . ?
 C15 N2 Cu1 124.3(3) . 8_465 ?
 C11 N3 C10 117.4(3) . . ?
 C4 O1 C7 117.1(5) . . ?
 C14 C13 C10 120.9(4) . . ?
 C17 C13 C10 121.8(4) . . ?
 C17 C13 C14 117.3(4) . . ?
 C10 C9 H9 119.9 . . ?
 C10 C9 C8 120.2(4) . . ?
 C8 C9 H9 119.9 . . ?
 N3 C10 C13 116.0(4) . . ?
 N3 C10 C9 122.8(4) . . ?
 C9 C10 C13 121.2(4) . . ?
 C9 C8 C1 121.6(4) . . ?
 C12 C8 C9 116.3(4) . . ?
 C12 C8 C1 122.1(4) . . ?
 C8 C12 H12 119.8 . . ?
 C11 C12 C8 120.5(4) . . ?
 C11 C12 H12 119.8 . . ?
 C18 C22 H22 119.8 . . ?
 C21 C22 H22 119.8 . . ?
 C21 C22 C18 120.4(4) . . ?
 N3 C11 C12 122.8(4) . . ?
 N3 C11 C18 115.2(4) . . ?
 C12 C11 C18 122.0(4) . . ?
 C22 C18 C11 121.3(4) . . ?
 C22 C18 C19 116.0(4) . . ?
 C19 C18 C11 122.7(4) . . ?
 N2 C16 H16 118.1 . . ?
 N2 C16 C17 123.8(4) . . ?
 C17 C16 H16 118.1 . . ?
 C13 C14 H14 120.5 . . ?
 C15 C14 C13 118.9(4) . . ?
 C15 C14 H14 120.5 . . ?
 C13 C17 C16 119.6(4) . . ?
 C13 C17 H17 120.2 . . ?
 C16 C17 H17 120.2 . . ?
 N2 C15 C14 123.9(4) . . ?
 N2 C15 H15 118.0 . . ?
 C14 C15 H15 118.0 . . ?
 N1 C20 H20 118.1 . . ?
 N1 C20 C19 123.9(4) . . ?
 C19 C20 H20 118.1 . . ?
 C2 C1 C8 121.5(4) . . ?
 C2 C1 C6 117.2(4) . . ?
 C6 C1 C8 121.2(4) . . ?
 C1 C2 H2 118.8 . . ?
 C3 C2 C1 122.5(4) . . ?
 C3 C2 H2 118.8 . . ?
 N1 C21 C22 123.3(4) . . ?
 N1 C21 H21 118.3 . . ?
 C22 C21 H21 118.3 . . ?
 C18 C19 H19 119.9 . . ?
 C20 C19 C18 120.1(4) . . ?
 C20 C19 H19 119.9 . . ?
 O1 C4 C3 124.4(5) . . ?
 O1 C4 C5 115.9(5) . . ?
 C3 C4 C5 119.6(4) . . ?
 C2 C3 C4 119.3(5) . . ?
 C2 C3 H3 120.3 . . ?
 C4 C3 H3 120.3 . . ?
 C1 C6 H6 119.5 . . ?
 C5 C6 C1 121.0(5) . . ?
 C5 C6 H6 119.5 . . ?
 C4 C5 H5 119.8 . . ?
 C6 C5 C4 120.4(5) . . ?
 C6 C5 H5 119.8 . . ?
 O1 C7 H7A 109.5 . . ?
 O1 C7 H7B 109.5 . . ?
 O1 C7 H7C 109.5 . . ?
 H7A C7 H7B 109.5 . . ?
 H7A C7 H7C 109.5 . . ?
 H7B C7 H7C 109.5 . . ?
 C26 C30 H30A 109.5 . . ?
 C26 C30 H30B 109.5 . . ?
 C26 C30 H30C 109.5 . . ?
 H30A C30 H30B 109.5 . . ?
 H30A C30 H30C 109.5 . . ?
 H30B C30 H30C 109.5 . . ?

_shelx_res_file
;
TITL 1u.res in C2/c
    1u.res
    created by SHELXL-2016/6 at 16:28:21 on 15-Mar-2019
CELL 0.71073 23.8568 12.7232 17.6759 90 112.562 90
ZERR 8 0.0009 0.0005 0.0007 0 0.002 0
LATT 7
SYMM -X,+Y,0.5-Z
SFAC C H Cu I N O
UNIT 232 192 8 8 24 8
DFIX 1.5 C26 C30

L.S. 4
PLAN  4
TEMP -153.15
FREE C25 C28
BOND $H
htab
fmap 2
acta
REM <olex2.extras>
REM <HklSrc "%.\\1u.hkl">
REM </olex2.extras>

WGHT    0.069500   11.301600
FVAR       0.17124
AFIX  66
C24   1    0.455188    0.583664    0.801859    11.00000    0.20178    0.17885 =
         0.07250   -0.02574    0.06341   -0.10046
AFIX  43
H24   2    0.462272    0.640924    0.772183    11.00000   -1.20000
AFIX  65
C25   1    0.434787    0.602272    0.864493    11.00000    0.08500    0.04806 =
         0.23097    0.03110    0.00961    0.01622
AFIX  43
H25   2    0.427927    0.672250    0.877623    11.00000   -1.20000
AFIX  65
C26   1    0.424423    0.518493    0.907914    11.00000    0.07188    0.12200 =
         0.08377   -0.03357    0.02119   -0.00899
C27   1    0.434460    0.416104    0.888703    11.00000    0.33552    0.07837 =
         0.12714   -0.02577    0.12238   -0.07220
AFIX  43
H27   2    0.427377    0.358845    0.918380    11.00000   -1.20000
AFIX  65
C29   1    0.454861    0.397495    0.826070    11.00000    0.40749
AFIX  43
H29   2    0.461721    0.327517    0.812940    11.00000   -1.20000
AFIX  65
C28   1    0.465226    0.481274    0.782648    11.00000    0.50302
AFIX   0

I1    4    0.457088    1.144716    0.536857    11.00000    0.03990    0.03263 =
         0.03914    0.00244    0.02246    0.00469
CU1   3    0.501882    0.951789    0.565514    11.00000    0.02808    0.03332 =
         0.02780    0.00020    0.00896   -0.00328
N1    5    0.430869    0.857276    0.555138    11.00000    0.02662    0.03164 =
         0.02856    0.00001    0.01003   -0.00338
N2    5    0.070395    0.548279    0.177268    11.00000    0.02705    0.03524 =
         0.02963    0.00484    0.00960    0.00372
N3    5    0.253761    0.613180    0.435629    11.00000    0.02910    0.03037 =
         0.02477    0.00074    0.01021    0.00071
O1    6    0.291297    0.122029    0.774333    11.00000    0.11022    0.03802 =
         0.03522    0.01207    0.03071    0.00949
C13   1    0.162790    0.540684    0.334210    11.00000    0.02495    0.03441 =
         0.02368   -0.00177    0.00864    0.00060
C9    1    0.218822    0.448291    0.467000    11.00000    0.03410    0.02395 =
         0.02917   -0.00485    0.01413   -0.00335
AFIX  43
H9    2    0.189980    0.392871    0.449843    11.00000   -1.20000
AFIX   0
C10   1    0.213400    0.533637    0.415954    11.00000    0.02759    0.03149 =
         0.02552   -0.00120    0.01140    0.00040
C8    1    0.266634    0.443504    0.543705    11.00000    0.03476    0.03092 =
         0.02515   -0.00014    0.01413    0.00122
C12   1    0.307164    0.528047    0.564140    11.00000    0.03176    0.03200 =
         0.02440    0.00045    0.00751   -0.00292
AFIX  43
H12   2    0.339833    0.529715    0.616117    11.00000   -1.20000
AFIX   0
C22   1    0.339589    0.771750    0.468115    11.00000    0.03015    0.04394 =
         0.02769    0.00567    0.00508   -0.00729
AFIX  43
H22   2    0.306636    0.769445    0.416425    11.00000   -1.20000
AFIX   0
C11   1    0.300042    0.609129    0.509312    11.00000    0.02751    0.02950 =
         0.02697   -0.00217    0.00936    0.00177
C18   1    0.343899    0.696994    0.526885    11.00000    0.02922    0.02947 =
         0.02768    0.00284    0.01245   -0.00066
C16   1    0.068825    0.480629    0.234051    11.00000    0.02742    0.05383 =
         0.03326    0.00820    0.00828   -0.01004
AFIX  43
H16   2    0.035500    0.433433    0.219840    11.00000   -1.20000
AFIX   0
C14   1    0.164763    0.612658    0.275760    11.00000    0.03369    0.03066 =
         0.03072    0.00194    0.00797   -0.00603
AFIX  43
H14   2    0.197711    0.660399    0.288214    11.00000   -1.20000
AFIX   0
C17   1    0.112872    0.475240    0.312341    11.00000    0.03253    0.05631 =
         0.02985    0.01087    0.01149   -0.00796
AFIX  43
H17   2    0.108857    0.426846    0.350884    11.00000   -1.20000
AFIX   0
C15   1    0.117985    0.613379    0.199409    11.00000    0.03654    0.02968 =
         0.03313    0.00780    0.00811   -0.00127
AFIX  43
H15   2    0.119765    0.663134    0.160318    11.00000   -1.20000
AFIX   0
C20   1    0.433901    0.787364    0.612466    11.00000    0.04697    0.05062 =
         0.02404    0.00756    0.00283   -0.01642
AFIX  43
H20   2    0.466716    0.792506    0.664130    11.00000   -1.20000
AFIX   0
C1    1    0.272640    0.355496    0.600534    11.00000    0.04070    0.02722 =
         0.02614   -0.00042    0.01076    0.00506
C2    1    0.223153    0.295566    0.596157    11.00000    0.04360    0.02916 =
         0.03924    0.00368    0.02144    0.00529
AFIX  43
H2    2    0.185070    0.308736    0.553075    11.00000   -1.20000
AFIX   0
C21   1    0.382680    0.849370    0.484010    11.00000    0.03552    0.03913 =
         0.03569    0.01126    0.01129   -0.00317
AFIX  43
H21   2    0.378140    0.900002    0.442565    11.00000   -1.20000
AFIX   0
C19   1    0.392346    0.708036    0.601410    11.00000    0.05445    0.04922 =
         0.02827    0.00995    0.00381   -0.01589
AFIX  43
H19   2    0.396841    0.660701    0.644924    11.00000   -1.20000
AFIX   0
C4    1    0.282251    0.196839    0.714825    11.00000    0.08093    0.02457 =
         0.03243    0.00482    0.02837    0.00692
C3    1    0.226990    0.217219    0.652088    11.00000    0.05285    0.03646 =
         0.05004    0.00678    0.03440    0.01020
AFIX  43
H3    2    0.192024    0.177758    0.647492    11.00000   -1.20000
AFIX   0
C6    1    0.328536    0.331813    0.663617    11.00000    0.05416    0.03817 =
         0.04551    0.00737   -0.00132   -0.01508
AFIX  43
H6    2    0.363693    0.370471    0.667888    11.00000   -1.20000
AFIX   0
C5    1    0.333162    0.253305    0.719448    11.00000    0.07023    0.03846 =
         0.03653    0.00456   -0.00701   -0.00704
AFIX  43
H5    2    0.371455    0.237806    0.761328    11.00000   -1.20000
AFIX   0
C7    1    0.241158    0.057230    0.767205    11.00000    0.10608    0.06185 =
         0.09261    0.04545    0.07804    0.03355
AFIX 137
H7A   2    0.208854    0.100398    0.772549    11.00000   -1.50000
H7B   2    0.253971    0.003941    0.810549    11.00000   -1.50000
H7C   2    0.225998    0.022566    0.713590    11.00000   -1.50000
AFIX   0

C30   1    0.413307    0.547589    0.979194    11.00000    0.27823    0.28395 =
         0.20314    0.05636    0.13577   -0.06746
AFIX 137
H30A  2    0.370460    0.535653    0.969175    11.00000   -1.50000
H30B  2    0.423066    0.622097    0.991293    11.00000   -1.50000
H30C  2    0.438789    0.504926    1.025889    11.00000   -1.50000
AFIX   0
HKLF 4


REM  1u.res in C2/c
REM R1 =  0.0457 for    4691 Fo > 4sig(Fo)  and  0.0633 for all    6150 data
REM    296 parameters refined using      1 restraints

END

WGHT      0.0695     11.3014

REM Instructions for potential hydrogen bonds
EQIV $2 x-1/2, -y+3/2, z-1/2
HTAB C16 I1_$2
EQIV $4 -x+1/2, -y+3/2, -z+1
HTAB C17 I1_$4
EQIV $5 -x+1/2, y-1/2, -z+1/2
HTAB C15 I1_$5

REM Highest difference peak  1.152,  deepest hole -1.036,  1-sigma level  0.133
Q1    1   0.4350  1.0981  0.5451  11.00000  0.05    1.06
Q2    1   0.4558  0.5851  0.8334  11.00000  0.05    0.96
Q3    1   0.0837  0.4547  0.3601  11.00000  0.05    0.95
Q4    1   0.4424  1.1174  0.4888  11.00000  0.05    0.86
;
_shelx_res_checksum                34439
_shelx_hkl_file
;
   4   0   0 6130.25  111.10
   6   0   0   91.37    3.36
   8   0   0  553.30   12.82
  10   0   0  500.74   12.34
  12   0   0  133.47    5.04
  14   0   0    5.43    3.51
  16   0   0   49.69    7.43
  18   0   0 1032.47   34.71
  20   0   0  345.58   26.40
  22   0   0  204.05   17.52
  24   0   0  534.44   26.36
  26   0   0  451.42   25.27
  28   0   0   85.26   20.35
   1   1   0 6444.89  143.62
   3   1   0 1770.08   25.58
   5   1   0  843.91   11.79
   7   1   0  544.09    8.89
   9   1   0   81.92    3.59
  11   1   0   18.01    1.86
  13   1   0    2.31    1.17
  15   1   0  121.05    4.58
  17   1   0  248.04   10.03
  19   1   0  707.21   27.77
  21   1   0   41.38    8.52
  23   1   0  417.92   15.83
  25   1   0  211.89   13.96
  27   1   0  156.34   13.09
  29   1   0   30.85   10.76
   0   2   0 1979.35   36.50
   2   2   0 1214.74   28.66
   4   2   0 1222.08   17.03
   6   2   0    6.16    1.02
   8   2   0  497.03    7.21
  10   2   0 1265.02   19.14
  12   2   0  740.58   14.79
  14   2   0  752.94   15.68
  16   2   0  559.93   14.37
  18   2   0   39.40    6.30
  20   2   0   38.01    7.82
  22   2   0    1.62    3.57
  24   2   0   20.91    5.49
  26   2   0   13.33    5.32
  28   2   0   39.45   10.79
   1   3   0 1479.45   19.69
   3   3   0  561.12   10.72
   5   3   0   66.55    2.83
   7   3   0 1442.94   20.91
   9   3   0 1881.11   26.72
  11   3   0 2512.97   39.53
  13   3   0 2125.27   34.02
  15   3   0  524.83   14.17
  17   3   0  153.06   10.79
  19   3   0   33.66    7.22
  21   3   0   55.36    6.70
  23   3   0   67.20    8.06
  25   3   0   42.17    6.75
  27   3   0    8.48    6.11
   0   4   0 1971.27   37.63
   2   4   0  830.33   12.15
   4   4   0  276.47    6.77
   6   4   0  439.06    9.74
   8   4   0  789.31   14.30
  10   4   0 1753.57   28.38
  12   4   0 2013.29   26.82
  14   4   0 1081.09   23.26
  16   4   0   34.23    4.46
  18   4   0   21.18    5.09
  20   4   0   75.59    7.44
  22   4   0   85.34    8.39
  24   4   0   94.67    9.35
  26   4   0    5.90    5.15
  28   4   0   -1.26    7.70
   1   5   0    1.95    0.80
   3   5   0   61.09    2.37
   5   5   0    6.78    1.30
   7   5   0  199.49    6.13
   9   5   0   55.84    3.76
  11   5   0    2.27    1.54
  13   5   0  103.20    5.27
  15   5   0   62.45    5.63
  17   5   0    0.69    2.40
  19   5   0    0.35    2.99
  21   5   0    0.13    3.51
  23   5   0    5.06    4.37
  25   5   0    1.62    4.70
  27   5   0   -2.21    5.61
   0   6   0  492.60   11.80
   2   6   0  549.76    9.83
   4   6   0   14.74    1.57
   6   6   0   37.70    2.50
   8   6   0  382.15    8.02
  10   6   0  318.08    7.57
  12   6   0  757.41   14.10
  14   6   0  289.05    7.85
  16   6   0   86.77    5.57
  18   6   0   -1.61    2.31
  20   6   0   -0.74    3.22
  22   6   0   45.74    6.75
  24   6   0    6.32    4.88
  26   6   0   25.17    8.28
   1   7   0 1167.12   21.29
   3   7   0  258.45    6.04
   5   7   0  190.36    4.86
   7   7   0  394.95    6.67
   9   7   0 1007.19   15.29
  11   7   0 1418.12   22.39
  13   7   0 1288.93   19.86
  15   7   0  439.28    9.33
  17   7   0   30.56    4.21
  19   7   0    3.60    2.94
  21   7   0   49.24    6.71
  23   7   0   13.03    5.97
  25   7   0   71.63   15.87
   0   8   0   66.34    4.13
   2   8   0   18.22    1.75
   4   8   0   86.93    3.84
   6   8   0  131.85    4.88
   8   8   0  649.78   12.83
  10   8   0  684.07   13.97
  12   8   0  709.21   14.88
  14   8   0  507.30   12.89
  16   8   0   31.94    3.86
  18   8   0   29.84    6.27
  20   8   0   -0.54    4.52
  22   8   0    6.77    6.41
  24   8   0    3.22    7.33
   1   9   0  734.64   18.40
   3   9   0  791.93   16.32
   5   9   0  289.52    8.23
   7   9   0   82.20    5.43
   9   9   0   78.38    5.64
  11   9   0    7.80    2.82
  13   9   0    4.63    2.80
  15   9   0   85.45    7.00
  17   9   0   19.84    4.24
  19   9   0   56.08    8.47
  21   9   0   65.84    9.60
  23   9   0   49.16   11.08
   0  10   0 2051.04   76.94
   2  10   0 1447.61   32.34
   4  10   0  748.19   24.31
   6  10   0  153.84   10.56
   8  10   0    0.75    2.59
  10  10   0   46.19    4.90
  12  10   0   15.94    3.50
  14  10   0   11.47    3.63
  16  10   0    4.21    2.78
  18  10   0   95.56    7.96
  20  10   0   82.48    9.95
  22  10   0  274.56   17.43
   1  11   0 1760.63   49.22
   3  11   0  649.33   22.00
   5  11   0  283.62   14.00
   7  11   0   12.55    4.71
   9  11   0   88.85    9.75
  11  11   0   18.44    5.82
  13  11   0    1.65    4.24
  15  11   0    7.39    5.66
  17  11   0   19.40    5.36
  19  11   0  249.32   16.12
  21  11   0   74.52   12.73
   0  12   0  714.02   37.00
   2  12   0   15.88    8.05
   4  12   0  181.64   11.57
   6  12   0    6.19    4.34
   8  12   0   44.94    7.49
  10  12   0   62.42    9.31
  12  12   0    9.13    5.97
  14  12   0  118.03   12.73
  16  12   0   15.19    5.59
  18  12   0   98.99   12.09
  20  12   0   27.16    7.36
   1  13   0   21.38    9.67
   3  13   0   37.47    5.89
   5  13   0   25.33    5.99
   7  13   0   39.13    7.28
   9  13   0  321.54   17.42
  11  13   0  204.96   16.70
  13  13   0  280.21   17.36
  15  13   0   74.35   11.55
  17  13   0   46.34    7.85
   2  14   0  195.27   24.38
   4  14   0   13.91   10.12
   6  14   0   68.13    9.20
   8  14   0   59.94    9.25
  10  14   0  263.62   17.43
  12  14   0  263.11   17.93
  14  14   0  122.69   14.08
  16  14   0   34.31    7.56
   3  15   0   13.92   11.29
   5  15   0   -0.10   10.21
   7  15   0   61.75    9.51
   9  15   0   31.51    8.16
  11  15   0   34.16    8.82
  13  15   0   35.78    8.93
   2  16   0   27.19   16.36
   4  16   0   -5.93   10.77
   6  16   0   -1.02   10.73
   8  16   0   10.29    6.83
 -28   0   1   -8.84    8.34
 -26   0   1   -0.93    5.62
 -24   0   1   -3.71    5.12
 -22   0   1    1.64    4.86
 -20   0   1    3.17    3.53
 -18   0   1    0.95    2.90
 -16   0   1    0.77    1.54
 -14   0   1    2.91    1.56
 -12   0   1    0.78    1.34
 -10   0   1   -1.56    1.12
  -8   0   1   -0.47    1.01
  -6   0   1    2.28    1.25
  -4   0   1   -0.62    0.64
  -2   0   1   -3.94    0.58
   0   0   1   -9.98    0.15
   2   0   1   -1.05    0.37
   4   0   1    2.31    0.68
   6   0   1    1.55    1.15
   8   0   1    1.73    1.25
  10   0   1    4.75    1.83
  12   0   1   -0.21    1.56
  14   0   1    1.77    2.13
  16   0   1    5.24    5.09
  18   0   1    4.46    5.32
  20   0   1    6.36    6.72
  22   0   1    0.43    7.60
  24   0   1    3.20    5.60
  26   0   1   -2.33    6.29
  28   0   1   -4.90    9.59
 -29   1   1   56.49   12.38
 -27   1   1   47.39    8.00
 -25   1   1   42.85    6.95
 -23   1   1   81.60    8.48
 -21   1   1  197.84    9.58
 -19   1   1  203.84    8.36
 -17   1   1  935.35   22.28
 -15   1   1  586.22   11.38
 -13   1   1  541.63    9.21
 -11   1   1   28.65    2.11
  -9   1   1  373.27    6.99
  -7   1   1 1540.91   19.85
  -5   1   1 7100.66   84.19
  -3   1   1   30.84    0.91
  -1   1   1    2.21    0.41
   1   1   1   64.48    1.56
   3   1   1  323.49    5.71
   5   1   1 1733.63   23.75
   7   1   1 1361.96   24.54
   9   1   1 1084.21   23.97
  11   1   1  452.69   11.42
  13   1   1    2.82    1.32
  15   1   1   47.13    5.49
  17   1   1  275.71   15.58
  19   1   1  119.17   13.39
  21   1   1  343.00   19.74
  23   1   1    4.70    5.56
  25   1   1   16.86    5.40
  27   1   1   48.00   11.34
 -28   2   1   76.93   11.63
 -26   2   1   99.07   10.26
 -24   2   1    9.46    4.45
 -22   2   1    3.14    2.98
 -20   2   1  148.58    8.20
 -18   2   1 1110.90   20.80
 -16   2   1  840.21   17.27
 -14   2   1  866.06   15.24
 -12   2   1  345.76    7.36
 -10   2   1  365.76    7.38
  -8   2   1  726.49   11.67
  -6   2   1 1377.34   15.64
  -4   2   1 2743.37   36.08
  -2   2   1  672.73   10.15
   0   2   1    0.90    0.63
   2   2   1  575.14   11.90
   4   2   1  869.55   15.69
   6   2   1 4956.69   71.28
   8   2   1 2903.34   36.23
  10   2   1  829.49   17.50
  12   2   1  851.16   18.58
  14   2   1  118.36    7.47
  16   2   1  170.76   12.73
  18   2   1  413.20   20.03
  20   2   1  327.67   18.65
  22   2   1   14.41    6.60
  24   2   1   17.58    5.41
  26   2   1   72.96    9.40
  28   2   1   93.75   15.80
 -29   3   1    8.76    8.57
 -27   3   1   30.93    6.93
 -25   3   1    4.66    4.21
 -23   3   1    4.63    3.83
 -21   3   1   -0.22    2.73
 -19   3   1   29.19    4.29
 -17   3   1  352.96    8.69
 -15   3   1  166.97    6.03
 -13   3   1  294.04    8.19
 -11   3   1  352.69    8.54
  -9   3   1  562.35    9.57
  -7   3   1    5.93    1.09
  -5   3   1  174.24    3.30
  -3   3   1 2058.50   33.45
  -1   3   1  174.88    3.84
   1   3   1  463.18    7.82
   3   3   1 1150.04   17.77
   5   3   1  769.04   13.20
   7   3   1 1259.64   20.66
   9   3   1   84.29    2.91
  11   3   1  213.36    4.62
  13   3   1   83.61    6.79
  15   3   1   11.71    3.50
  17   3   1   36.36    6.93
  19   3   1   14.70    5.52
  21   3   1   11.34    6.04
  23   3   1   20.83    6.10
  25   3   1   24.91    6.11
  27   3   1   35.00    8.65
 -28   4   1   13.53    7.01
 -26   4   1   19.82    5.66
 -24   4   1   25.99    5.99
 -22   4   1    1.06    3.00
 -20   4   1   30.65    4.75
 -18   4   1  118.54    7.39
 -16   4   1  278.33    7.48
 -14   4   1    4.84    1.64
 -12   4   1   -0.15    1.18
 -10   4   1  296.11    5.66
  -8   4   1  773.83   10.87
  -6   4   1  881.42   12.31
  -4   4   1  847.03   12.52
  -2   4   1  494.98    9.56
   0   4   1  236.53    4.30
   2   4   1   48.59    2.77
   4   4   1   60.11    2.58
   6   4   1    0.11    1.00
   8   4   1   51.46    3.47
  10   4   1   14.28    2.15
  12   4   1   82.75    4.02
  14   4   1   92.32    7.53
  16   4   1  241.57   10.91
  18   4   1  503.00   22.53
  20   4   1  296.20   18.05
  22   4   1   62.69    9.12
  24   4   1   27.80    6.28
  26   4   1    0.19    5.31
  28   4   1   -3.60    7.53
 -27   5   1   92.99   11.92
 -25   5   1   81.22    9.11
 -23   5   1   13.77    5.00
 -21   5   1   11.48    3.73
 -19   5   1  341.71   11.34
 -17   5   1  633.16   13.80
 -15   5   1  473.46   10.87
 -13   5   1   31.61    2.34
 -11   5   1    6.58    1.41
  -9   5   1  734.88   10.80
  -7   5   1 2323.88   27.79
  -5   5   1 2914.59   39.15
  -3   5   1 1839.66   25.19
  -1   5   1 1002.54   15.74
   1   5   1  216.43    4.17
   3   5   1  145.13    4.62
   5   5   1   17.60    1.79
   7   5   1 2827.43   55.10
   9   5   1  361.19    9.67
  11   5   1   53.35    4.32
  13   5   1  236.29    8.07
  15   5   1  603.60   18.60
  17   5   1  952.55   26.39
  19   5   1  718.41   29.06
  21   5   1  292.05   15.27
  23   5   1   82.46    8.87
  25   5   1    1.06    4.97
  27   5   1    4.27    6.57
 -26   6   1   69.15   10.29
 -24   6   1   20.22    5.61
 -22   6   1    2.69    3.69
 -20   6   1   46.33    5.46
 -18   6   1  179.10    8.03
 -16   6   1  248.88    7.87
 -14   6   1   24.35    2.58
 -12   6   1   13.57    2.01
 -10   6   1   79.13    3.79
  -8   6   1  302.15    6.09
  -6   6   1 2134.03   27.40
  -4   6   1 1825.80   25.53
  -2   6   1 1135.12   16.35
   0   6   1   79.50    2.96
   2   6   1  148.21    4.77
   4   6   1   77.42    3.89
   6   6   1  312.50    7.15
   8   6   1  904.25   18.56
  10   6   1   12.88    2.53
  12   6   1   40.92    4.16
  14   6   1  422.99   12.02
  16   6   1  421.53   15.54
  18   6   1  407.42   16.02
  20   6   1  348.16   13.71
  22   6   1   91.91    8.87
  24   6   1    6.58    4.74
  26   6   1   20.24    9.19
 -27   7   1    4.87   10.74
 -25   7   1   10.12    7.96
 -23   7   1   12.31    6.04
 -21   7   1   26.01    5.41
 -19   7   1   14.80    3.36
 -17   7   1    4.58    2.47
 -15   7   1   21.93    2.75
 -13   7   1   26.47    2.76
 -11   7   1   40.42    3.23
  -9   7   1   -0.92    1.12
  -7   7   1    9.90    1.32
  -5   7   1    3.84    1.22
  -3   7   1   65.02    2.65
  -1   7   1    2.39    1.63
   1   7   1  221.98    4.64
   3   7   1    1.33    1.12
   5   7   1  685.25   12.63
   7   7   1    5.45    1.55
   9   7   1  108.88    5.88
  11   7   1   73.77    5.67
  13   7   1  153.82    7.52
  15   7   1   38.22    4.66
  17   7   1    7.09    3.63
  19   7   1    6.56    3.43
  21   7   1   10.52    5.52
  23   7   1    3.85    5.29
  25   7   1    0.79   10.17
 -26   8   1    5.43   12.12
 -24   8   1    4.39    6.94
 -22   8   1    5.96    6.83
 -20   8   1  121.35   11.12
 -18   8   1  354.35   15.21
 -16   8   1  248.26    8.79
 -14   8   1  419.85   10.45
 -12   8   1   65.60    4.29
 -10   8   1   -1.31    1.38
  -8   8   1  524.21    9.92
  -6   8   1  475.55    9.18
  -4   8   1  458.89    8.53
  -2   8   1  197.94    5.99
   0   8   1    3.51    1.12
   2   8   1   15.60    1.73
   4   8   1  982.00   17.16
   6   8   1 1061.33   16.68
   8   8   1 1051.31   21.77
  10   8   1  243.70    8.76
  12   8   1   90.90    7.58
  14   8   1    0.27    2.53
  16   8   1  104.53    7.64
  18   8   1   67.91    6.22
  20   8   1   81.15    9.66
  22   8   1    1.10    6.90
  24   8   1   -0.51    8.62
 -25   9   1   32.88   15.29
 -23   9   1    5.52    7.19
 -21   9   1   29.01    7.06
 -19   9   1  215.97   14.68
 -17   9   1  346.61   12.04
 -15   9   1  381.88   11.86
 -13   9   1  156.82    7.36
 -11   9   1   28.03    3.54
  -9   9   1  212.77    7.07
  -7   9   1  381.03    9.24
  -5   9   1  608.93   13.49
  -3   9   1  672.95   17.68
  -1   9   1  105.41    6.30
   1   9   1    2.76    2.02
   3   9   1  592.72   13.17
   5   9   1  794.06   15.22
   7   9   1  766.88   17.15
   9   9   1  579.81   14.69
  11   9   1  100.79    7.08
  13   9   1    3.52    2.84
  15   9   1   56.14    6.00
  17   9   1  275.80    9.67
  19   9   1  169.06   13.55
  21   9   1   37.77    7.94
  23   9   1   -1.98    7.09
 -24  10   1   -2.38    9.69
 -22  10   1   12.96    6.35
 -20  10   1   36.33    7.52
 -18  10   1   18.71    4.49
 -16  10   1   53.20    5.23
 -14  10   1   70.91    6.40
 -12  10   1   -0.68    2.37
 -10  10   1   20.29    3.63
  -8  10   1    0.67    2.52
  -6  10   1   23.70    5.35
  -4  10   1   34.00    5.71
  -2  10   1    8.99    2.99
   0  10   1    8.70    2.57
   2  10   1    5.73    2.68
   4  10   1   34.69    5.58
   6  10   1   85.44    8.72
   8  10   1   83.81    7.32
  10  10   1    1.27    2.39
  12  10   1   38.38    4.98
  14  10   1   50.49    5.83
  16  10   1   40.38    6.55
  18  10   1    9.07    4.26
  20  10   1   23.49    6.89
  22  10   1   -2.13    5.67
 -21  11   1    0.73    6.73
 -19  11   1   59.89    8.79
 -17  11   1   19.55    6.54
 -15  11   1   90.59    8.48
 -13  11   1   -0.70    4.06
 -11  11   1   -1.48    3.97
  -9  11   1    7.17    4.58
  -7  11   1  242.59   13.39
  -5  11   1  198.15   11.58
  -3  11   1    1.89    3.14
  -1  11   1  256.89    9.84
   1  11   1   24.26    5.99
   3  11   1   61.27    7.14
   5  11   1  130.51   10.85
   7  11   1  173.32   12.05
   9  11   1  161.55   13.47
  11  11   1   12.27    5.39
  13  11   1    2.54    4.38
  15  11   1    4.88    5.23
  17  11   1   47.35    9.10
  19  11   1   63.97    8.36
  21  11   1    1.10    6.69
 -20  12   1   42.19    8.23
 -18  12   1  164.34   14.89
 -16  12   1  157.30   11.97
 -14  12   1  226.14   15.13
 -12  12   1   10.23    5.71
 -10  12   1   -2.43    3.99
  -8  12   1  319.79   16.23
  -6  12   1  432.29   18.58
  -4  12   1  501.96   19.47
  -2  12   1   23.65    4.91
   0  12   1    3.40    4.08
   2  12   1   13.88    3.74
   4  12   1  475.58   18.70
   6  12   1  327.62   16.13
   8  12   1  319.94   16.41
  10  12   1  208.23   14.55
  12  12   1   15.00    6.64
  14  12   1   -5.61    4.99
  16  12   1   15.87    6.92
  18  12   1   92.54    9.42
  20  12   1   51.70   17.11
 -19  13   1   25.88    8.70
 -17  13   1  120.08   13.77
 -15  13   1   34.77    6.83
 -13  13   1  107.57   12.66
 -11  13   1   -1.61    5.18
  -9  13   1   32.09    7.49
  -7  13   1   43.70    7.76
  -5  13   1  311.08   15.56
  -3  13   1    1.89    3.55
  -1  13   1   23.21    9.36
   1  13   1  105.86   17.29
   3  13   1   14.77    8.54
   5  13   1  258.26   14.11
   7  13   1  180.47   13.20
   9  13   1  120.19   12.78
  11  13   1   81.20   10.86
  13  13   1    3.86    6.15
  15  13   1   -0.26    5.97
  17  13   1   15.66    5.94
 -16  14   1    0.67    5.30
 -14  14   1    4.01    4.88
 -12  14   1   29.00    7.58
 -10  14   1   -6.87    5.46
  -8  14   1   23.65    7.07
  -6  14   1    0.45    4.69
  -4  14   1   22.33   10.90
  -2  14   1   31.74   11.01
   2  14   1   69.93   16.65
   4  14   1   -2.68    8.37
   6  14   1    4.85    5.01
   8  14   1    0.50    5.08
  10  14   1    4.44    5.76
  12  14   1    3.80    6.59
  14  14   1    5.82    6.52
  16  14   1    9.85    7.49
 -13  15   1    4.04    6.71
 -11  15   1    2.59    6.28
  -9  15   1   53.84    9.76
  -7  15   1  186.43   14.38
  -5  15   1  135.02   22.28
  -3  15   1   73.88   17.56
  -1  15   1   58.70   25.67
   3  15   1    3.31   10.53
   5  15   1   60.06   16.67
   7  15   1   46.62    8.57
   9  15   1   49.79    9.26
  11  15   1   -1.91    6.29
  13  15   1   -1.06    6.20
 -10  16   1   -0.42    6.30
  -8  16   1  108.62   12.14
  -6  16   1  134.78   23.18
  -4  16   1   71.67   19.33
  -2  16   1   60.36   16.72
   4  16   1   33.27   14.65
   6  16   1   17.94   13.65
   8  16   1   69.71    9.84
 -30   0   2   14.05   11.86
 -28   0   2    0.86    7.12
 -26   0   2  166.19   17.76
 -24   0   2  435.31   18.77
 -22   0   2  899.13   27.41
 -20   0   2 1151.43   31.08
 -18   0   2  862.27   24.33
 -16   0   2  472.80   12.34
 -14   0   2   -1.02    1.40
 -12   0   2  582.50   13.12
 -10   0   2  577.42   12.53
  -8   0   2  650.82   14.91
  -6   0   2   33.22    2.24
  -4   0   2 5617.70   79.12
  -2   0   2 1618.81   53.10
   0   0   2 6772.09  122.05
   2   0   2 7492.76  104.77
   4   0   2 1528.02   20.57
   6   0   2  844.46   14.88
   8   0   2  269.68   10.21
  10   0   2   94.06    6.31
  12   0   2  289.52   12.02
  14   0   2  160.89    9.21
  16   0   2  227.33   19.76
  18   0   2   45.37   12.27
  20   0   2  303.09   25.24
  22   0   2  220.82   26.71
  24   0   2  170.44   25.11
  26   0   2  185.50   20.89
  28   0   2   42.26   16.52
 -29   1   2    0.79    6.96
 -27   1   2  103.26   10.73
 -25   1   2   21.78    4.98
 -23   1   2  841.45   19.01
 -21   1   2  449.17   12.33
 -19   1   2  604.35   13.91
 -17   1   2  478.56    9.09
 -15   1   2   52.45    3.03
 -13   1   2    1.13    1.01
 -11   1   2   70.00    2.82
  -9   1   2   29.30    1.85
  -7   1   2    4.97    1.08
  -5   1   2    7.76    0.78
  -3   1   2 1631.20   16.81
  -1   1   2  998.22   16.53
   1   1   2 3345.71   40.18
   3   1   2 9999.00   98.60
   5   1   2 3491.21   45.64
   7   1   2 1102.04   14.84
   9   1   2   61.97    2.86
  11   1   2  255.81    6.23
  13   1   2  135.70    5.91
  15   1   2   42.74    5.32
  17   1   2   22.91    6.13
  19   1   2   43.02    8.63
  21   1   2  128.30   14.18
  23   1   2  147.66   16.26
  25   1   2   76.93   13.14
  27   1   2   28.90   10.56
 -30   2   2   44.51   11.79
 -28   2   2    3.47    5.58
 -26   2   2   -0.22    4.02
 -24   2   2    3.59    3.63
 -22   2   2  105.33    7.25
 -20   2   2   17.66    3.32
 -18   2   2   81.34    4.96
 -16   2   2  228.52    6.48
 -14   2   2  301.45    5.86
 -12   2   2  225.53    4.97
 -10   2   2  617.30    9.31
  -8   2   2 1205.53   16.40
  -6   2   2  688.56    9.56
  -4   2   2 7460.62   77.99
  -2   2   2   -0.14    0.54
   0   2   2   23.43    1.26
   2   2   2  904.50   12.85
   4   2   2  335.48    5.94
   6   2   2  200.47    4.38
   8   2   2   69.21    2.69
  10   2   2 1780.12   25.36
  12   2   2  207.30    6.94
  14   2   2  322.16   11.99
  16   2   2   58.14    8.45
  18   2   2    0.53    4.01
  20   2   2   17.70    6.66
  22   2   2   42.70    9.48
  24   2   2    8.72    7.24
  26   2   2    4.92    5.65
  28   2   2    2.80    8.30
 -29   3   2   13.53    8.59
 -27   3   2   -3.86    4.44
 -25   3   2   19.88    4.69
 -23   3   2   13.37    4.11
 -21   3   2   57.57    5.39
 -19   3   2   81.18    5.74
 -17   3   2    8.50    2.14
 -15   3   2   68.91    4.12
 -13   3   2  881.29   14.27
 -11   3   2  799.32   12.66
  -9   3   2 4543.19   51.95
  -7   3   2 3450.02   42.32
  -5   3   2 5239.08   58.72
  -3   3   2   55.29    1.88
  -1   3   2 3739.18   59.46
   1   3   2 1635.95   22.27
   3   3   2 1956.21   32.59
   5   3   2  200.71    5.50
   7   3   2    1.80    1.07
   9   3   2 1390.32   26.02
  11   3   2 1443.04   23.97
  13   3   2 1407.02   32.82
  15   3   2  724.69   20.91
  17   3   2   -2.37    3.59
  19   3   2  104.15   12.02
  21   3   2    4.44    5.15
  23   3   2   24.33    8.19
  25   3   2   25.70    7.37
  27   3   2   29.43   10.10
 -28   4   2   -1.63    5.26
 -26   4   2    6.53    4.91
 -24   4   2   19.51    4.79
 -22   4   2  115.91    8.40
 -20   4   2  258.60    9.03
 -18   4   2   12.25    2.74
 -16   4   2    4.39    1.79
 -14   4   2  741.78   12.92
 -12   4   2  553.38   10.00
 -10   4   2 1930.99   22.54
  -8   4   2 1384.70   16.51
  -6   4   2 2413.41   32.72
  -4   4   2   -0.57    0.70
  -2   4   2 1313.25   20.01
   0   4   2 1515.59   22.85
   2   4   2 1434.10   18.39
   4   4   2  968.80   16.01
   6   4   2    0.60    1.00
   8   4   2   94.13    4.62
  10   4   2 1006.10   20.49
  12   4   2 1143.50   20.62
  14   4   2  471.55   15.65
  16   4   2  105.67    8.81
  18   4   2   54.24    9.15
  20   4   2   -0.14    4.33
  22   4   2    3.28    5.56
  24   4   2   56.42    9.33
  26   4   2   16.34    7.21
 -29   5   2   -3.95    7.31
 -27   5   2    2.55    5.09
 -25   5   2    1.77    4.37
 -23   5   2    0.97    3.48
 -21   5   2    0.36    2.85
 -19   5   2   24.49    3.72
 -17   5   2    2.03    1.75
 -15   5   2   47.81    3.67
 -13   5   2   50.66    2.78
 -11   5   2    1.82    0.97
  -9   5   2  229.71    4.80
  -7   5   2  150.63    3.44
  -5   5   2  324.28    7.94
  -3   5   2   40.81    2.15
  -1   5   2   26.16    1.80
   1   5   2  261.25    5.14
   3   5   2  344.13    7.18
   5   5   2  115.85    3.90
   7   5   2    2.28    1.23
   9   5   2   75.93    4.43
  11   5   2  147.69    6.50
  13   5   2    2.37    2.07
  15   5   2   28.44    3.63
  17   5   2    4.32    3.50
  19   5   2    6.44    5.10
  21   5   2    8.49    6.20
  23   5   2    3.66    5.39
  25   5   2   -0.68    5.48
 -28   6   2    3.62    8.14
 -26   6   2   22.16    5.73
 -24   6   2   58.93    7.73
 -22   6   2   61.64    6.59
 -20   6   2   41.84    5.73
 -18   6   2   24.46    3.48
 -16   6   2    0.11    1.81
 -14   6   2  221.65    5.61
 -12   6   2  425.19    7.35
 -10   6   2  845.40   12.27
  -8   6   2  680.69    9.93
  -6   6   2  491.19    7.64
  -4   6   2  118.86    3.78
  -2   6   2   39.01    2.38
   0   6   2  799.47   12.15
   2   6   2 1632.37   21.15
   4   6   2  228.22    5.75
   6   6   2  190.93    5.50
   8   6   2   45.71    3.65
  10   6   2  285.75    9.05
  12   6   2  413.59   11.79
  14   6   2  327.43   10.53
  16   6   2  173.43    7.91
  18   6   2   16.54    4.94
  20   6   2    8.38    5.92
  22   6   2    7.91    5.91
  24   6   2   36.87    7.02
  26   6   2   19.78   10.36
 -27   7   2   -3.35   10.68
 -25   7   2   24.65    8.73
 -23   7   2   86.67   10.16
 -21   7   2   74.33    6.89
 -19   7   2   93.36    6.39
 -17   7   2    2.14    2.25
 -15   7   2  108.05    5.03
 -13   7   2  850.97   13.20
 -11   7   2 1283.60   20.29
  -9   7   2 1914.23   25.78
  -7   7   2  790.91   13.12
  -5   7   2  514.02    9.21
  -3   7   2   15.29    2.15
  -1   7   2  743.21   14.80
   1   7   2  939.07   12.32
   3   7   2 1335.54   21.78
   5   7   2   64.10    3.69
   7   7   2    0.39    1.32
   9   7   2  254.29    8.46
  11   7   2  730.60   17.21
  13   7   2  659.24   16.53
  15   7   2  479.28   13.80
  17   7   2  140.47    6.38
  19   7   2   16.78    5.34
  21   7   2   33.00    7.59
  23   7   2   14.14    6.67
  25   7   2   42.45   16.14
 -26   8   2   -5.56   11.06
 -24   8   2    3.20    6.86
 -22   8   2    0.68    5.66
 -20   8   2   14.58    4.31
 -18   8   2   27.84    5.26
 -16   8   2   10.55    2.94
 -14   8   2  198.74    6.43
 -12   8   2  377.62    8.93
 -10   8   2  641.11   12.04
  -8   8   2  700.44   14.01
  -6   8   2  656.33   11.68
  -4   8   2   79.07    3.74
  -2   8   2   31.67    2.36
   0   8   2    9.02    1.40
   2   8   2  115.80    3.99
   4   8   2  159.15    6.00
   6   8   2   27.40    3.36
   8   8   2  164.71    8.20
  10   8   2  369.72   13.13
  12   8   2  323.41   15.06
  14   8   2  273.93   11.86
  16   8   2   24.74    5.04
  18   8   2   72.96    6.62
  20   8   2    0.37    4.48
  22   8   2    4.14    6.80
  24   8   2   18.95   12.50
 -25   9   2   61.38   17.47
 -23   9   2  113.76   15.42
 -21   9   2   56.35    8.36
 -19   9   2  144.59   10.29
 -17   9   2  114.58    7.36
 -15   9   2    8.30    2.58
 -13   9   2    1.43    1.99
 -11   9   2   33.98    3.75
  -9   9   2   86.39    5.23
  -7   9   2    4.20    1.89
  -5   9   2  433.74    9.40
  -3   9   2   57.81    5.41
  -1   9   2  590.62   15.90
   1   9   2  389.63    9.57
   3   9   2  174.87    6.14
   5   9   2  106.16    4.79
   7   9   2   79.47    5.65
   9   9   2   82.09    7.12
  11   9   2   60.38    5.67
  13   9   2   18.24    3.82
  15   9   2    8.92    3.63
  17   9   2    6.10    3.50
  19   9   2    8.60    5.58
  21   9   2   -2.05    4.95
  23   9   2    2.14    7.70
 -24  10   2   87.93   14.23
 -22  10   2  381.07   18.93
 -20  10   2  202.76   14.60
 -18  10   2  285.02   11.19
 -16  10   2  104.22    7.03
 -14  10   2    0.57    2.26
 -12  10   2   73.83    5.46
 -10  10   2  212.50    7.99
  -8  10   2   42.49    5.02
  -6  10   2  201.86   11.54
  -4  10   2  318.64   14.06
  -2  10   2  519.25   15.20
   0  10   2 1442.56   31.84
   2  10   2 1483.11   32.99
   4  10   2  740.96   20.41
   6  10   2  421.37   17.24
   8  10   2   32.17    4.84
  10  10   2   -0.97    2.43
  12  10   2  358.09   12.14
  14  10   2   43.29    5.55
  16  10   2  124.37   10.46
  18  10   2   10.26    3.69
  20  10   2    4.74    5.90
  22  10   2   65.59   10.60
 -23  11   2  155.35   18.10
 -21  11   2  164.89   16.93
 -19  11   2  285.89   15.50
 -17  11   2  187.89   14.20
 -15  11   2    6.71    4.16
 -13  11   2    5.73    4.86
 -11  11   2   85.56    9.85
  -9  11   2   70.71    9.10
  -7  11   2   31.51    6.44
  -5  11   2   47.77    7.10
  -3  11   2  198.50   11.00
  -1  11   2  677.96   18.43
   1  11   2  891.15   29.59
   3  11   2  579.64   20.27
   5  11   2  353.82   15.72
   7  11   2   98.15    9.94
   9  11   2    0.17    4.05
  11  11   2   72.99    9.25
  13  11   2   39.82    7.56
  15  11   2   30.60    7.56
  17  11   2    7.50    6.43
  19  11   2   17.09    5.64
  21  11   2   16.24    8.77
 -20  12   2   44.54   15.77
 -18  12   2   64.63    9.79
 -16  12   2   16.15    6.47
 -14  12   2   27.55    5.66
 -12  12   2   31.62    7.21
 -10  12   2   19.63    6.04
  -8  12   2    4.34    4.67
  -6  12   2   31.35    6.41
  -4  12   2   53.40    7.49
  -2  12   2   16.12    4.31
   0  12   2  104.92   10.74
   2  12   2   71.42   13.83
   4  12   2   83.64    8.85
   6  12   2   34.41    6.63
   8  12   2   19.59    5.86
  10  12   2    1.63    4.82
  12  12   2   13.49    6.42
  14  12   2   -2.85    5.03
  16  12   2    4.82    6.29
  18  12   2    1.46    5.09
 -19  13   2   14.49    7.55
 -17  13   2    3.65    6.48
 -15  13   2   51.84    7.80
 -13  13   2   90.73    9.47
 -11  13   2  228.41   15.77
  -9  13   2  223.14   14.76
  -7  13   2  147.59   12.00
  -5  13   2   34.80    7.02
  -3  13   2   95.06    9.09
  -1  13   2  238.28   21.85
   1  13   2  162.05   21.53
   3  13   2   32.02   10.91
   5  13   2   34.82    6.61
   7  13   2    0.32    4.79
   9  13   2   61.44    9.87
  11  13   2   60.32    9.77
  13  13   2  134.86   14.04
  15  13   2  120.63   14.07
  17  13   2   29.33    8.92
 -16  14   2    7.82    7.22
 -14  14   2   42.29    7.60
 -12  14   2   79.57   10.90
 -10  14   2  338.40   18.87
  -8  14   2  212.87   15.27
  -6  14   2   61.09    8.63
  -4  14   2  138.46   10.83
  -2  14   2   45.42   12.95
   0  14   2  226.17   30.14
   2  14   2  202.54   25.62
   4  14   2  126.59   19.97
   6  14   2   11.35    5.48
   8  14   2   16.06    6.61
  10  14   2  134.30   13.77
  12  14   2  165.96   15.55
  14  14   2  178.88   16.96
 -13  15   2   27.77    7.43
 -11  15   2   17.28    7.15
  -9  15   2   25.29    7.56
  -7  15   2   49.19    8.95
  -5  15   2   -3.70    4.51
  -3  15   2    1.44   10.45
  -1  15   2   35.22   12.83
   3  15   2   68.97   17.02
   5  15   2   -0.38   10.80
   7  15   2   -1.67    5.24
   9  15   2   27.00    8.10
  11  15   2    2.95    6.61
 -10  16   2    9.65    6.80
  -8  16   2   22.58    7.39
  -6  16   2   15.28   12.85
  -4  16   2   -6.79   10.09
  -2  16   2    2.43   10.89
   4  16   2   -8.23   10.53
   6  16   2    1.17   11.25
   8  16   2    2.51    5.93
 -30   0   3   -8.69    8.53
 -28   0   3   -2.42    5.97
 -26   0   3   -1.23    4.80
 -24   0   3    4.83    4.63
 -22   0   3   -1.22    3.66
 -20   0   3   -2.79    2.94
 -18   0   3    0.48    1.90
 -16   0   3    1.12    1.72
 -14   0   3    0.70    1.63
 -12   0   3   -0.66    1.30
 -10   0   3    0.38    1.47
  -8   0   3   -0.05    1.27
  -6   0   3    1.67    1.34
  -4   0   3   -3.00    0.98
  -2   0   3   -4.81    0.55
   0   0   3    0.37    0.68
   2   0   3   -0.52    0.76
   4   0   3    0.33    0.75
   6   0   3    0.79    0.82
   8   0   3    4.14    1.26
  10   0   3    0.15    1.86
  12   0   3   -0.02    2.17
  14   0   3   -0.16    2.51
  16   0   3   -2.78    4.86
  18   0   3   -1.29    5.47
  20   0   3    0.37    6.68
  22   0   3   -0.80    7.08
  24   0   3    0.01    8.40
  26   0   3    1.53   10.06
 -29   1   3    7.16    7.82
 -27   1   3    8.17    4.21
 -25   1   3  188.34   10.59
 -23   1   3   94.83    7.17
 -21   1   3    0.89    2.28
 -19   1   3  430.50   11.32
 -17   1   3  432.91    8.60
 -15   1   3 1540.42   20.97
 -13   1   3 1272.05   17.51
 -11   1   3  476.68    9.12
  -9   1   3  143.31    4.05
  -7   1   3 1134.87   16.77
  -5   1   3 1707.24   20.22
  -3   1   3 2470.45   28.20
  -1   1   3  345.60    4.53
   1   1   3  897.00   14.21
   3   1   3   61.83    1.89
   5   1   3 2000.52   22.27
   7   1   3  804.94   10.78
   9   1   3 1471.71   19.76
  11   1   3 1103.85   19.12
  13   1   3  250.90    8.45
  15   1   3   38.68    5.50
  17   1   3   49.40    8.60
  19   1   3  153.27   15.32
  21   1   3  162.46   16.92
  23   1   3   -0.75    5.63
  25   1   3   -2.30    5.80
  27   1   3    6.56    8.08
 -30   2   3    3.97    7.47
 -28   2   3    7.19    5.22
 -26   2   3  155.44    9.73
 -24   2   3  131.48    8.52
 -22   2   3    3.84    2.72
 -20   2   3   90.89    6.27
 -18   2   3  930.44   16.36
 -16   2   3 1622.92   22.26
 -14   2   3 2553.38   29.95
 -12   2   3 2145.08   25.22
 -10   2   3  747.56   11.41
  -8   2   3   87.39    2.93
  -6   2   3 7102.99   79.05
  -4   2   3  847.22   10.78
  -2   2   3 4051.18   57.89
   0   2   3   44.05    1.93
   2   2   3   34.80    2.01
   4   2   3 1992.35   25.24
   6   2   3 2526.43   34.58
   8   2   3 4284.48   57.04
  10   2   3 1086.48   17.02
  12   2   3  743.65   16.81
  14   2   3  358.56   13.21
  16   2   3   -2.96    2.46
  18   2   3  201.30   16.64
  20   2   3  111.37   13.48
  22   2   3   17.38    7.37
  24   2   3    4.20    6.30
  26   2   3   33.84    9.97
 -29   3   3   13.15    8.62
 -27   3   3    3.87    3.99
 -25   3   3    1.85    3.26
 -23   3   3    1.53    2.75
 -21   3   3   91.07    6.47
 -19   3   3  156.53    6.73
 -17   3   3  598.00   11.97
 -15   3   3  672.12   11.32
 -13   3   3  214.94    5.13
 -11   3   3 2025.13   26.97
  -9   3   3   14.14    1.75
  -7   3   3   19.02    1.40
  -5   3   3  172.93    3.36
  -3   3   3 1529.59   23.10
  -1   3   3  486.07    6.52
   1   3   3  299.54    5.13
   3   3   3  105.40    2.55
   5   3   3  692.31   14.07
   7   3   3 1947.31   30.61
   9   3   3 1288.64   21.83
  11   3   3  715.62   12.59
  13   3   3  337.00   12.50
  15   3   3  646.07   19.74
  17   3   3  114.06   12.28
  19   3   3    7.41    5.30
  21   3   3    1.57    5.03
  23   3   3   25.62    8.84
  25   3   3   41.03    9.98
  27   3   3   58.17   13.13
 -28   4   3   97.47   11.93
 -26   4   3  119.52    9.32
 -24   4   3  153.03    9.14
 -22   4   3   99.36    6.95
 -20   4   3   76.58    5.87
 -18   4   3   43.51    3.83
 -16   4   3    5.73    1.80
 -14   4   3   10.74    1.88
 -12   4   3   35.09    2.63
 -10   4   3   82.27    2.83
  -8   4   3 1757.95   24.94
  -6   4   3 1448.50   17.78
  -4   4   3 3149.68   38.65
  -2   4   3 2956.58   39.12
   0   4   3 2230.33   27.80
   2   4   3  669.35    9.77
   4   4   3  105.41    4.07
   6   4   3   69.99    3.63
   8   4   3  128.28    4.11
  10   4   3   14.46    2.19
  12   4   3  158.60    6.87
  14   4   3   34.60    3.83
  16   4   3  281.45   12.60
  18   4   3  253.44   17.57
  20   4   3  496.12   24.68
  22   4   3  127.20   15.57
  24   4   3  124.11   16.04
  26   4   3   38.43   11.39
 -29   5   3  110.15   13.39
 -27   5   3  268.91   14.59
 -25   5   3  338.14   13.23
 -23   5   3  357.71   12.75
 -21   5   3  107.80    7.23
 -19   5   3    1.01    2.19
 -17   5   3   42.47    3.90
 -15   5   3  198.78    5.91
 -13   5   3  319.44    7.21
 -11   5   3    3.19    1.01
  -9   5   3  399.44    7.22
  -7   5   3 3219.52   40.19
  -5   5   3 4473.00   58.69
  -3   5   3 4922.90   64.14
  -1   5   3 3657.93   48.26
   1   5   3 3770.28   49.87
   3   5   3   98.80    2.72
   5   5   3    0.44    1.10
   7   5   3  205.19    5.97
   9   5   3   79.75    4.31
  11   5   3    7.26    2.36
  13   5   3   20.90    3.41
  15   5   3  267.39    9.32
  17   5   3  584.40   19.89
  19   5   3  873.25   33.99
  21   5   3  420.09   23.31
  23   5   3  199.60   19.69
  25   5   3   98.61   15.82
 -28   6   3   75.07   13.41
 -26   6   3  177.43   11.48
 -24   6   3  227.30   12.38
 -22   6   3  268.46   11.45
 -20   6   3    6.24    2.86
 -18   6   3   19.76    3.25
 -16   6   3   36.73    3.36
 -14   6   3   51.29    3.14
 -12   6   3   20.53    2.05
 -10   6   3   79.34    3.06
  -8   6   3  530.92    8.71
  -6   6   3 2421.12   36.67
  -4   6   3 3017.18   44.31
  -2   6   3 3095.36   45.61
   0   6   3 1639.54   19.82
   2   6   3  750.50   11.00
   4   6   3   90.93    3.66
   6   6   3   37.61    3.00
   8   6   3    2.79    1.51
  10   6   3    6.68    2.36
  12   6   3    2.50    2.20
  14   6   3  281.50   10.01
  16   6   3  328.71   11.06
  18   6   3  626.19   21.54
  20   6   3  317.96   20.20
  22   6   3  163.53   17.93
  24   6   3   94.72   14.78
 -27   7   3    5.31   11.44
 -25   7   3   16.41    6.60
 -23   7   3   27.94    5.86
 -21   7   3   28.40    4.67
 -19   7   3  188.32    8.77
 -17   7   3  157.07    6.48
 -15   7   3  192.13    5.55
 -13   7   3  183.24    5.02
 -11   7   3  287.04    5.97
  -9   7   3   96.72    3.36
  -7   7   3  190.55    4.65
  -5   7   3  105.82    3.98
  -3   7   3  169.06    5.58
  -1   7   3  408.00    8.28
   1   7   3  766.62    9.85
   3   7   3   65.90    3.51
   5   7   3  283.80    7.28
   7   7   3  214.18    6.52
   9   7   3  313.02   11.12
  11   7   3  261.72    9.35
  13   7   3  171.21    8.51
  15   7   3  152.93    8.71
  17   7   3   76.16    6.55
  19   7   3   44.38    7.48
  21   7   3    9.79    7.37
  23   7   3    3.46    6.07
 -26   8   3   34.10   14.98
 -24   8   3   19.21    7.12
 -22   8   3   -0.68    4.79
 -20   8   3   31.61    6.52
 -18   8   3  657.50   18.45
 -16   8   3  599.13   14.15
 -14   8   3  683.13   13.97
 -12   8   3  535.26   10.24
 -10   8   3  269.62    6.79
  -8   8   3   -0.29    1.49
  -6   8   3   76.36    4.24
  -4   8   3  165.57    5.88
  -2   8   3  198.51    5.33
   0   8   3   11.13    1.19
   2   8   3   15.83    1.64
   4   8   3   85.11    4.31
   6   8   3  950.58   17.81
   8   8   3 1500.04   29.84
  10   8   3  729.86   18.65
  12   8   3  532.10   17.29
  14   8   3  182.00   10.26
  16   8   3    1.45    3.46
  18   8   3    5.28    3.64
  20   8   3   42.12   10.00
  22   8   3   41.41    8.39
  24   8   3   -1.94   10.70
 -25   9   3   78.22   14.80
 -23   9   3   26.94    7.07
 -21   9   3    1.93    4.14
 -19   9   3  126.22    9.65
 -17   9   3  472.25   12.72
 -15   9   3  696.79   17.72
 -13   9   3  543.96   12.01
 -11   9   3  595.80   12.33
  -9   9   3    3.46    1.93
  -7   9   3  245.93    7.06
  -5   9   3  364.11    9.72
  -3   9   3  282.77   10.17
  -1   9   3  203.94    8.33
   1   9   3    0.93    1.53
   3   9   3   19.19    3.56
   5   9   3  448.36   11.92
   7   9   3  941.24   23.97
   9   9   3  576.94   17.67
  11   9   3  539.51   17.54
  13   9   3   45.10    7.44
  15   9   3   67.68    7.88
  17   9   3  107.24    9.77
  19   9   3  100.31   11.40
  21   9   3   63.33   10.08
  23   9   3   -0.28    8.13
 -24  10   3   16.48    9.10
 -22  10   3   15.85    6.47
 -20  10   3   -0.16    4.06
 -18  10   3   19.53    3.82
 -16  10   3   21.96    3.90
 -14  10   3  135.86    7.54
 -12  10   3   59.19    4.50
 -10  10   3   15.61    3.09
  -8  10   3   10.63    3.10
  -6  10   3  260.62   13.31
  -4  10   3    0.21    3.01
  -2  10   3   49.74    5.19
   0  10   3    6.10    2.53
   2  10   3    0.80    2.38
   4  10   3   58.60    5.96
   6  10   3   64.38    7.69
   8  10   3   36.24    6.48
  10  10   3   68.05    7.48
  12  10   3   -1.22    3.17
  14  10   3   13.88    4.23
  16  10   3    1.24    3.78
  18  10   3   15.43    4.91
  20  10   3   28.91    7.52
 -23  11   3    6.04    7.83
 -21  11   3    7.95    7.56
 -19  11   3   31.20    5.44
 -17  11   3  111.67   11.53
 -15  11   3   70.59    9.57
 -13  11   3   93.87    8.70
 -11  11   3   38.72    6.99
  -9  11   3   46.14    7.58
  -7  11   3   46.43    7.21
  -5  11   3  300.80   14.62
  -3  11   3   10.54    3.94
  -1  11   3  279.62   10.64
   1  11   3   15.23    5.14
   3  11   3    2.33    2.78
   5  11   3   61.11    7.71
   7  11   3  289.01   14.84
   9  11   3   43.09    7.69
  11  11   3  224.40   14.29
  13  11   3    1.15    5.10
  15  11   3    1.42    5.36
  17  11   3   -2.30    5.45
  19  11   3   20.24    5.38
 -20  12   3   21.76   12.06
 -18  12   3  140.96   13.53
 -16  12   3  416.69   20.55
 -14  12   3  378.97   19.04
 -12  12   3  258.71   12.69
 -10  12   3   -0.14    3.90
  -8  12   3   -4.34    3.62
  -6  12   3  116.99   11.20
  -4  12   3  300.13   14.69
  -2  12   3  112.95    8.86
   0  12   3   40.13    7.11
   2  12   3    3.98    4.55
   4  12   3  109.86    8.99
   6  12   3  382.44   17.40
   8  12   3  371.39   17.95
  10  12   3  555.63   23.46
  12  12   3  208.60   15.70
  14  12   3   20.42    7.41
  16  12   3    4.68    6.74
  18  12   3   30.90    8.92
 -19  13   3   52.70    9.55
 -17  13   3  109.20   13.03
 -15  13   3  270.32   17.37
 -13  13   3  141.05   11.45
 -11  13   3   94.78    9.34
  -9  13   3   28.41    7.08
  -7  13   3    1.03    4.26
  -5  13   3   46.45    7.79
  -3  13   3   14.07    4.81
  -1  13   3   11.97    8.45
   1  13   3   19.03    6.50
   3  13   3   68.75   14.72
   5  13   3  110.34   10.29
   7  13   3  305.65   16.39
   9  13   3  234.65   16.01
  11  13   3  152.46   14.79
  13  13   3   40.30    9.49
  15  13   3    6.11    7.05
  17  13   3   -1.82    9.47
 -16  14   3    6.87    7.42
 -14  14   3    2.24    5.98
 -12  14   3   16.12    6.18
 -10  14   3   32.96    8.01
  -8  14   3   22.16    6.77
  -6  14   3   83.29    9.83
  -4  14   3  220.51   13.48
  -2  14   3   17.90   10.36
   0  14   3   86.88   16.00
   2  14   3   33.48   11.50
   4  14   3   71.10   16.83
   6  14   3    4.32    4.81
   8  14   3   33.77    7.99
  10  14   3   12.05    6.42
  12  14   3   16.05    7.49
  14  14   3    7.80    7.47
 -13  15   3   14.05    7.91
 -11  15   3   -3.31    4.87
  -9  15   3   33.13    8.15
  -7  15   3  217.73   15.34
  -5  15   3  335.28   16.71
  -3  15   3  477.64   35.31
  -1  15   3  138.01   21.38
   3  15   3    2.37   10.12
   5  15   3    0.38   11.28
   7  15   3    6.96    5.65
   9  15   3   10.20    6.96
  11  15   3   -0.37    6.14
 -10  16   3   -0.94    5.32
  -8  16   3  112.15   10.73
  -6  16   3  192.26   26.19
  -4  16   3  344.01   32.42
  -2  16   3  201.77   26.36
   4  16   3  -11.28   10.83
   6  16   3  -13.27    9.95
 -30   0   4   40.40   15.76
 -28   0   4   54.29    9.27
 -26   0   4   57.31    8.85
 -24   0   4  240.64   14.82
 -22   0   4  166.75   12.53
 -20   0   4 1068.38   29.11
 -18   0   4  481.36   13.34
 -16   0   4   97.14    5.83
 -14   0   4  164.25    7.37
 -12   0   4  117.36    5.91
 -10   0   4 2535.10   50.08
  -8   0   4  818.09   18.54
  -6   0   4 4718.64   87.70
  -4   0   4 2801.61   65.34
  -2   0   4  807.87   14.54
   0   0   4 2549.49   41.80
   2   0   4 1470.30   25.40
   4   0   4 4116.35   66.66
   6   0   4 5470.56   78.28
   8   0   4   55.26    2.68
  10   0   4   24.99    4.71
  12   0   4 1123.08   33.20
  14   0   4 1291.38   38.10
  16   0   4  328.36   25.12
  18   0   4  167.85   22.05
  20   0   4   39.92   13.25
  22   0   4   -5.84    7.37
  24   0   4   50.86   15.44
  26   0   4    8.14   11.64
 -29   1   4   61.17    7.99
 -27   1   4   42.69    6.03
 -25   1   4    0.33    3.07
 -23   1   4  201.03    9.94
 -21   1   4  148.25    8.13
 -19   1   4  292.22    8.04
 -17   1   4  116.67    4.68
 -15   1   4   27.56    2.46
 -13   1   4   16.05    2.09
 -11   1   4  114.06    3.96
  -9   1   4  569.63   10.14
  -7   1   4  925.93   14.33
  -5   1   4 3412.29   45.23
  -3   1   4  201.98    3.78
  -1   1   4  829.47   11.19
   1   1   4 1917.56   26.33
   3   1   4 1035.03   13.34
   5   1   4 1345.67   17.03
   7   1   4   16.21    1.22
   9   1   4  131.49    4.16
  11   1   4  508.65   10.84
  13   1   4  585.82   15.01
  15   1   4  232.55   10.91
  17   1   4   27.20    7.18
  19   1   4   35.30    8.04
  21   1   4   13.97    7.08
  23   1   4    2.96    6.36
  25   1   4    9.42    7.60
 -30   2   4   23.81    7.80
 -28   2   4   14.50    4.60
 -26   2   4    5.57    3.64
 -24   2   4   46.14    5.34
 -22   2   4    5.06    2.67
 -20   2   4   59.10    5.07
 -18   2   4   14.52    2.26
 -16   2   4    2.13    1.51
 -14   2   4   14.47    2.06
 -12   2   4   55.50    3.05
 -10   2   4  166.68    4.17
  -8   2   4  522.92    8.48
  -6   2   4 2033.97   24.19
  -4   2   4 1987.49   29.71
  -2   2   4  199.67    4.54
   0   2   4    2.01    0.79
   2   2   4  119.95    2.92
   4   2   4  206.62    4.04
   6   2   4   57.28    2.09
   8   2   4   54.23    2.77
  10   2   4    3.23    1.37
  12   2   4   22.73    2.58
  14   2   4   13.23    3.84
  16   2   4   65.57    7.41
  18   2   4    3.79    4.81
  20   2   4    9.16    5.87
  22   2   4    1.77    5.29
  24   2   4   42.33   10.76
  26   2   4   22.74    9.64
 -29   3   4   56.53    8.28
 -27   3   4   29.48    5.18
 -25   3   4   15.44    4.01
 -23   3   4  178.28    9.57
 -21   3   4  214.12    8.61
 -19   3   4  681.38   13.57
 -17   3   4  288.01    6.94
 -15   3   4  110.46    4.02
 -13   3   4  456.88    8.14
 -11   3   4 1180.56   18.42
  -9   3   4 1152.61   19.32
  -7   3   4 2644.27   31.03
  -5   3   4  297.56    5.39
  -3   3   4  894.15   14.92
  -1   3   4  906.27   12.19
   1   3   4 2085.48   31.28
   3   3   4 1521.60   23.90
   5   3   4 1543.46   20.49
   7   3   4  727.14   12.43
   9   3   4  232.70    5.73
  11   3   4  164.13    5.79
  13   3   4  232.90    8.12
  15   3   4 1050.81   28.23
  17   3   4   25.32    5.39
  19   3   4   36.17    8.19
  21   3   4    5.45    5.48
  23   3   4   54.38   11.44
  25   3   4   59.92   12.80
 -30   4   4   57.96   13.10
 -28   4   4   43.07    7.43
 -26   4   4    5.33    3.69
 -24   4   4   72.00    6.57
 -22   4   4  177.41    9.31
 -20   4   4  302.15    8.65
 -18   4   4  462.40   10.46
 -16   4   4  236.26    6.14
 -14   4   4    1.95    1.28
 -12   4   4  708.01   13.88
 -10   4   4  459.58    7.75
  -8   4   4 1850.56   26.20
  -6   4   4 1264.74   18.45
  -4   4   4  716.05   12.28
  -2   4   4  201.60    4.86
   0   4   4 1367.16   17.99
   2   4   4 1873.65   26.30
   4   4   4 1852.57   24.17
   6   4   4  604.06   12.07
   8   4   4  105.06    4.67
  10   4   4    1.65    1.25
  12   4   4  528.82   13.85
  14   4   4  424.89   12.16
  16   4   4  260.30   12.55
  18   4   4   75.37   10.83
  20   4   4   -2.65    5.18
  22   4   4    0.36    6.06
  24   4   4   57.39   12.12
  26   4   4   48.86   12.57
 -29   5   4   10.75    5.82
 -27   5   4    5.19    4.32
 -25   5   4   -1.99    3.16
 -23   5   4    6.21    3.28
 -21   5   4    1.76    2.57
 -19   5   4   37.99    3.85
 -17   5   4   42.61    4.38
 -15   5   4   19.13    2.44
 -13   5   4    2.76    1.39
 -11   5   4  195.17    4.69
  -9   5   4  316.36    6.76
  -7   5   4   13.91    1.88
  -5   5   4    8.63    1.45
  -3   5   4  121.14    3.49
  -1   5   4  137.31    3.80
   1   5   4  892.32   12.84
   3   5   4    6.40    1.08
   5   5   4   43.71    3.17
   7   5   4   23.83    2.58
   9   5   4    1.38    1.53
  11   5   4   10.91    2.77
  13   5   4    1.90    2.27
  15   5   4   52.74    5.24
  17   5   4    0.06    3.27
  19   5   4    4.32    4.64
  21   5   4   -0.59    5.98
  23   5   4   16.77    8.23
  25   5   4    4.74    8.02
 -28   6   4    6.30    6.44
 -26   6   4   -1.72    3.69
 -24   6   4    6.32    3.72
 -22   6   4   45.75    5.63
 -20   6   4  147.94    7.99
 -18   6   4  188.07    7.55
 -16   6   4   57.23    4.02
 -14   6   4    4.68    1.70
 -12   6   4  232.60    5.36
 -10   6   4  366.44    7.11
  -8   6   4  998.77   17.44
  -6   6   4  962.34   13.84
  -4   6   4  115.76    3.07
  -2   6   4  350.19    7.48
   0   6   4  132.93    3.37
   2   6   4 1359.37   18.53
   4   6   4  406.54    9.10
   6   6   4  229.87    6.67
   8   6   4  151.69    5.07
  10   6   4   34.72    4.03
  12   6   4  149.12    7.78
  14   6   4   87.08    6.76
  16   6   4   33.20    4.62
  18   6   4   68.72    8.82
  20   6   4    1.47    4.66
  22   6   4   10.23    8.18
  24   6   4   -0.45    7.38
 -27   7   4   12.70    8.20
 -25   7   4    0.52    5.24
 -23   7   4   61.60    7.66
 -21   7   4  187.87    8.94
 -19   7   4  219.95    8.53
 -17   7   4  427.60    9.92
 -15   7   4   28.30    2.59
 -13   7   4   25.13    2.37
 -11   7   4  529.94    9.48
  -9   7   4 1416.61   19.98
  -7   7   4 1648.68   24.32
  -5   7   4  749.06   11.90
  -3   7   4   61.53    2.60
  -1   7   4  102.92    3.80
   1   7   4 2074.72   25.36
   3   7   4 1102.81   17.05
   5   7   4 1129.46   19.99
   7   7   4  246.47    7.37
   9   7   4    2.76    2.23
  11   7   4  175.56    7.92
  13   7   4  172.34    8.71
  15   7   4  190.67    9.34
  17   7   4  100.81    7.66
  19   7   4   20.29    6.07
  21   7   4    2.24    4.84
  23   7   4   10.71    8.51
 -26   8   4   10.24    7.18
 -24   8   4   -0.55    5.19
 -22   8   4    4.70    4.78
 -20   8   4   67.33    8.48
 -18   8   4   92.23    8.00
 -16   8   4   32.04    3.72
 -14   8   4   21.26    3.14
 -12   8   4  116.42    5.30
 -10   8   4  188.88    6.02
  -8   8   4  490.00   11.03
  -6   8   4  222.45    8.57
  -4   8   4  168.56    6.10
  -2   8   4   15.64    2.01
   0   8   4  395.73    8.54
   2   8   4  337.23    6.37
   4   8   4  154.27    5.34
   6   8   4  373.99    9.42
   8   8   4    0.67    2.27
  10   8   4    9.47    2.98
  12   8   4   17.43    4.03
  14   8   4  141.42   10.59
  16   8   4   21.60    5.04
  18   8   4    2.25    3.50
  20   8   4   -3.53    5.56
  22   8   4    4.63    7.42
 -25   9   4    8.94    6.73
 -23   9   4   27.03    7.50
 -21   9   4   51.76    8.48
 -19   9   4    8.56    4.10
 -17   9   4   31.49    4.10
 -15   9   4   -0.73    2.17
 -13   9   4   12.21    2.98
 -11   9   4    6.64    2.20
  -9   9   4    2.31    1.73
  -7   9   4  197.66    8.63
  -5   9   4   23.63    3.59
  -3   9   4   12.85    3.15
  -1   9   4    0.30    2.23
   1   9   4   23.75    2.85
   3   9   4  125.74    6.09
   5   9   4   36.35    4.05
   7   9   4   51.18    5.87
   9   9   4    6.94    3.44
  11   9   4    6.70    3.57
  13   9   4  104.35    9.29
  15   9   4   -1.10    3.62
  17   9   4  111.70   10.24
  19   9   4    3.18    4.40
  21   9   4    8.50    6.75
 -24  10   4   19.91    7.65
 -22  10   4  168.79   14.16
 -20  10   4  198.09   11.89
 -18  10   4  176.23    8.51
 -16  10   4   86.78    6.47
 -14  10   4    5.13    2.70
 -12  10   4   26.49    3.55
 -10  10   4  565.76   12.25
  -8  10   4  159.60   11.34
  -6  10   4 1242.94   36.56
  -4  10   4  112.67    9.68
  -2  10   4   37.32    4.81
   0  10   4  263.85    9.90
   2  10   4  510.34   14.98
   4  10   4  516.25   15.76
   6  10   4  291.94   14.28
   8  10   4   -5.52    3.26
  10  10   4    8.21    3.89
  12  10   4  353.44   14.64
  14  10   4  232.20   12.86
  16  10   4  133.70   11.41
  18  10   4   33.86    6.24
  20  10   4   34.24    8.75
 -23  11   4   42.81   11.01
 -21  11   4  109.57   11.77
 -19  11   4  182.21   13.72
 -17  11   4   70.74    9.62
 -15  11   4    0.80    4.31
 -13  11   4    0.07    4.01
 -11  11   4  223.82   11.10
  -9  11   4   82.32    7.80
  -7  11   4  318.58   15.59
  -5  11   4  280.13   14.18
  -3  11   4   87.84    8.67
  -1  11   4   28.24    4.44
   1  11   4  186.45   12.36
   3  11   4  335.18   12.08
   5  11   4  436.22   17.97
   7  11   4   69.36    8.72
   9  11   4    3.56    4.56
  11  11   4   89.88   10.71
  13  11   4  279.96   16.72
  15  11   4  124.86   13.53
  17  11   4   64.37   10.87
  19  11   4   30.55    8.27
 -22  12   4   -2.76   10.46
 -20  12   4    2.89   10.04
 -18  12   4   -0.09    5.23
 -16  12   4    1.58    5.45
 -14  12   4    9.09    5.62
 -12  12   4    1.27    3.73
 -10  12   4    3.28    3.70
  -8  12   4    1.35    4.18
  -6  12   4    3.27    4.10
  -4  12   4   -1.22    3.67
  -2  12   4   38.83    6.18
   0  12   4    2.79    4.67
   2  12   4   11.72    5.02
   4  12   4    2.36    3.64
   6  12   4    7.55    4.58
   8  12   4   18.80    6.18
  10  12   4    9.65    5.62
  12  12   4   18.00    6.70
  14  12   4    9.62    6.47
  16  12   4   -0.10    6.58
  18  12   4    4.87    7.44
 -19  13   4   38.98    8.39
 -17  13   4   44.01    9.24
 -15  13   4    4.51    6.15
 -13  13   4   11.72    6.57
 -11  13   4   68.01    8.40
  -9  13   4  114.55    9.96
  -7  13   4  308.70   16.46
  -5  13   4   24.75    6.27
  -3  13   4   19.90    5.11
  -1  13   4   36.73   11.54
   1  13   4  133.84   13.36
   3  13   4  156.15   20.88
   5  13   4   95.15    9.53
   7  13   4  137.50   13.17
   9  13   4    4.31    5.47
  11  13   4    6.60    6.26
  13  13   4    4.29    6.40
  15  13   4   50.14   10.40
 -18  14   4   52.65   13.14
 -16  14   4   80.93   12.15
 -14  14   4   24.94    7.96
 -12  14   4   21.25    7.85
 -10  14   4  144.86   11.61
  -8  14   4  289.37   14.20
  -6  14   4  109.33   11.51
  -4  14   4   57.77    8.07
  -2  14   4    6.79    8.64
   0  14   4   37.63   11.93
   2  14   4  282.05   25.67
   4  14   4  169.29   22.54
   6  14   4  138.80   12.23
   8  14   4   36.77    8.38
  10  14   4   24.61    7.84
  12  14   4   60.13   10.64
 -15  15   4   26.10   13.03
 -13  15   4    8.79    7.40
 -11  15   4    4.98    6.45
  -9  15   4    4.63    5.27
  -7  15   4   75.30    8.65
  -5  15   4    9.95    5.16
  -3  15   4    8.63   10.99
  -1  15   4   11.39   10.04
   3  15   4   60.42   17.01
   5  15   4   42.83   15.58
   7  15   4   12.62   12.99
   9  15   4    3.33    6.40
 -10  16   4    7.91    5.74
  -8  16   4    6.18    5.87
  -6  16   4   15.17    5.41
  -4  16   4    8.89    7.46
  -2  16   4   14.66   10.99
   4  16   4    4.44   11.61
   6  16   4   28.46   15.92
 -30   0   5   -3.85    7.03
 -28   0   5   -3.21    5.15
 -26   0   5    0.97    4.49
 -24   0   5   -2.83    3.69
 -22   0   5   -2.26    3.22
 -20   0   5   -1.51    2.28
 -18   0   5   -1.22    1.90
 -16   0   5   -1.08    1.90
 -14   0   5   -1.30    1.72
 -12   0   5   -1.31    1.46
 -10   0   5    0.03    1.54
  -8   0   5    0.59    1.41
  -6   0   5    0.31    1.65
  -4   0   5   -0.11    1.10
  -2   0   5   -3.49    0.87
   0   0   5   -0.03    1.11
   2   0   5    2.34    1.29
   4   0   5   -1.16    1.03
   6   0   5    0.01    1.15
   8   0   5    0.78    1.27
  10   0   5    2.67    1.28
  12   0   5    1.09    2.56
  14   0   5    2.30    3.10
  16   0   5    1.83    6.30
  18   0   5   -4.07    5.08
  20   0   5    5.60    8.82
  22   0   5   -7.98    6.98
  24   0   5  -14.02    6.90
  26   0   5   -5.08    9.31
 -31   1   5    6.95    5.78
 -29   1   5    5.86    4.68
 -27   1   5    8.50    3.85
 -25   1   5  129.31    8.65
 -23   1   5  124.11    8.03
 -21   1   5   48.15    4.93
 -19   1   5    5.93    1.90
 -17   1   5  137.76    5.22
 -15   1   5 1726.23   26.68
 -13   1   5 1351.23   21.42
 -11   1   5 2493.87   35.44
  -9   1   5  354.08    7.42
  -7   1   5  395.57    7.70
  -5   1   5 1146.61   18.65
  -3   1   5 2527.15   31.53
  -1   1   5 1481.24   18.15
   1   1   5 1042.95   15.72
   3   1   5  270.91    5.40
   5   1   5  228.00    4.63
   7   1   5  805.08   11.38
   9   1   5  440.95    8.07
  11   1   5 1049.87   17.24
  13   1   5  320.70   10.68
  15   1   5   36.36    5.81
  17   1   5    0.85    4.46
  19   1   5   15.04    6.16
  21   1   5   38.43    9.41
  23   1   5   18.11    8.33
  25   1   5    5.45    7.14
 -30   2   5    0.45    5.29
 -28   2   5    9.62    4.27
 -26   2   5   72.70    6.85
 -24   2   5  119.71    7.92
 -22   2   5   53.39    5.19
 -20   2   5   -0.33    1.70
 -18   2   5  194.72    5.83
 -16   2   5 1161.18   18.34
 -14   2   5 2433.07   35.55
 -12   2   5 4368.70   59.51
 -10   2   5  832.25   12.71
  -8   2   5 1637.85   21.98
  -6   2   5  500.80    7.32
  -4   2   5  366.42    6.93
  -2   2   5  934.81   13.15
   0   2   5 2044.54   24.57
   2   2   5  164.99    3.98
   4   2   5  325.37    6.73
   6   2   5  537.25    8.30
   8   2   5 1499.71   22.74
  10   2   5 1457.08   22.30
  12   2   5 1106.17   20.55
  14   2   5  211.30   10.60
  16   2   5  138.28   10.62
  18   2   5   15.50    6.23
  20   2   5   28.66    8.31
  22   2   5   46.19   10.51
  24   2   5   31.41    9.82
 -29   3   5   -0.32    4.20
 -27   3   5    2.66    3.43
 -25   3   5    1.65    3.06
 -23   3   5   -1.01    2.47
 -21   3   5   33.60    4.31
 -19   3   5   92.31    4.97
 -17   3   5  305.97    7.32
 -15   3   5  656.24   11.65
 -13   3   5 1071.36   16.36
 -11   3   5 1584.89   22.07
  -9   3   5  475.27    9.83
  -7   3   5  998.06   15.14
  -5   3   5   24.46    2.13
  -3   3   5  151.48    3.79
  -1   3   5   38.35    1.94
   1   3   5   38.34    2.38
   3   3   5  230.09    5.01
   5   3   5  680.88    9.96
   7   3   5  587.81   10.91
   9   3   5  823.05   14.23
  11   3   5  744.15   15.37
  13   3   5  185.00    7.70
  15   3   5   95.42    8.87
  17   3   5    7.85    3.92
  19   3   5    6.62    5.98
  21   3   5   -2.24    4.96
  23   3   5    3.21    6.39
  25   3   5    0.82    8.17
 -30   4   5   12.86    7.07
 -28   4   5   64.09    7.15
 -26   4   5  244.71   11.52
 -24   4   5  331.01   11.20
 -22   4   5  352.99   10.89
 -20   4   5  160.40    7.06
 -18   4   5  124.61    6.22
 -16   4   5    6.13    1.76
 -14   4   5    1.49    1.31
 -12   4   5    8.77    1.73
 -10   4   5   29.84    1.89
  -8   4   5 1529.06   22.57
  -6   4   5 2109.78   32.63
  -4   4   5 1666.06   29.13
  -2   4   5 1687.86   26.24
   0   4   5 1483.14   19.69
   2   4   5 1402.87   22.59
   4   4   5  303.11    5.99
   6   4   5  182.57    5.88
   8   4   5    4.97    1.58
  10   4   5    7.05    1.71
  12   4   5   40.52    4.60
  14   4   5    4.77    2.57
  16   4   5   47.09    7.08
  18   4   5  174.90   13.40
  20   4   5  205.79   19.29
  22   4   5   74.09   12.78
  24   4   5   85.37   14.70
 -29   5   5   48.45    8.27
 -27   5   5  295.05   12.86
 -25   5   5  658.77   16.89
 -23   5   5  716.14   16.87
 -21   5   5  739.99   15.18
 -19   5   5   85.23    5.42
 -17   5   5    1.78    1.60
 -15   5   5   99.84    5.27
 -13   5   5  570.61   12.34
 -11   5   5  338.58    6.63
  -9   5   5  628.51   12.23
  -7   5   5  991.24   17.14
  -5   5   5 1941.43   33.76
  -3   5   5 5536.30   79.62
  -1   5   5 1545.78   24.61
   1   5   5 3765.81   50.58
   3   5   5 1399.46   19.29
   5   5   5  187.59    5.94
   7   5   5   19.23    2.62
   9   5   5   53.23    4.19
  11   5   5   32.52    4.24
  13   5   5  387.61   12.21
  15   5   5   64.42    5.93
  17   5   5   72.32    9.07
  19   5   5  407.12   17.93
  21   5   5  484.99   26.29
  23   5   5  193.48   20.45
 -28   6   5   90.20   11.93
 -26   6   5  264.81   12.50
 -24   6   5  319.30   11.16
 -22   6   5  811.49   19.77
 -20   6   5  138.74    7.01
 -18   6   5   86.83    5.74
 -16   6   5   32.88    3.20
 -14   6   5   60.91    4.01
 -12   6   5  226.32    6.06
 -10   6   5  183.42    5.80
  -8   6   5  592.95   11.81
  -6   6   5  712.88   14.86
  -4   6   5 2252.00   34.44
  -2   6   5 1984.67   30.87
   0   6   5  992.60   13.33
   2   6   5 1156.20   17.86
   4   6   5  635.21   10.22
   6   6   5   79.79    5.31
   8   6   5    3.47    1.86
  10   6   5    3.84    2.40
  12   6   5  267.49   10.01
  14   6   5   -1.66    2.47
  16   6   5  131.18    8.63
  18   6   5  182.95   14.12
  20   6   5  292.18   16.78
  22   6   5  218.10   21.12
  24   6   5   51.38   12.52
 -27   7   5   21.33    8.78
 -25   7   5   30.45    7.52
 -23   7   5   33.14    5.44
 -21   7   5  116.74    6.88
 -19   7   5  131.30    7.14
 -17   7   5  182.26    6.51
 -15   7   5   81.55    4.58
 -13   7   5  256.56    6.29
 -11   7   5   83.62    4.82
  -9   7   5  603.17   12.33
  -7   7   5  142.00    4.79
  -5   7   5  304.20    5.99
  -3   7   5  201.99    5.24
  -1   7   5   41.21    2.82
   1   7   5  333.25    6.11
   3   7   5    2.47    1.08
   5   7   5  316.51    7.71
   7   7   5  255.21    7.83
   9   7   5   30.55    4.20
  11   7   5  322.85   11.17
  13   7   5   31.79    4.69
  15   7   5  126.66    8.82
  17   7   5   41.81    5.65
  19   7   5   21.98    6.25
  21   7   5   51.97    9.17
  23   7   5    7.98    9.45
 -26   8   5    4.86    6.40
 -24   8   5   56.89    9.30
 -22   8   5    4.04    5.08
 -20   8   5    8.96    4.71
 -18   8   5  140.34    9.47
 -16   8   5  586.62   13.74
 -14   8   5  790.17   15.61
 -12   8   5 1033.96   19.90
 -10   8   5  523.08   13.35
  -8   8   5  353.61   11.87
  -6   8   5    0.79    1.71
  -4   8   5  198.79    5.24
  -2   8   5  163.39    4.79
   0   8   5  432.34    8.80
   2   8   5   -0.19    1.11
   4   8   5   40.76    3.22
   6   8   5  403.86    9.33
   8   8   5  497.99   13.71
  10   8   5  857.87   23.22
  12   8   5  262.71   10.48
  14   8   5  386.61   15.45
  16   8   5    2.98    4.26
  18   8   5    5.52    4.24
  20   8   5   -0.14    6.36
  22   8   5   33.92   10.06
 -25   9   5   84.59   11.06
 -23   9   5   45.08    8.26
 -21   9   5   17.64    5.78
 -19   9   5    2.78    3.76
 -17   9   5  218.80    8.76
 -15   9   5  735.73   18.28
 -13   9   5  654.46   14.95
 -11   9   5  629.74   14.10
  -9   9   5  373.99   12.94
  -7   9   5   24.26    3.44
  -5   9   5   65.06    5.01
  -3   9   5  229.50    8.17
  -1   9   5  540.68   15.55
   1   9   5  245.33    7.46
   3   9   5    7.51    2.34
   5   9   5   58.02    4.50
   7   9   5  289.94   11.68
   9   9   5  744.60   21.61
  11   9   5  438.23   16.10
  13   9   5  157.93   11.64
  15   9   5   59.98    7.86
  17   9   5    0.77    4.36
  19   9   5   61.49   12.01
  21   9   5   19.61    9.53
 -24  10   5   10.63    6.44
 -22  10   5   15.64    6.31
 -20  10   5   11.43    4.64
 -18  10   5    3.26    3.69
 -16  10   5   11.33    3.37
 -14  10   5   77.79    5.91
 -12  10   5   90.52    6.06
 -10  10   5    8.44    3.01
  -8  10   5   88.06    7.69
  -6  10   5   15.32    3.94
  -4  10   5   76.79    7.03
  -2  10   5   76.27    7.27
   0  10   5   23.93    4.03
   2  10   5    4.90    2.82
   4  10   5   39.68    5.15
   6  10   5    6.37    3.97
   8  10   5   84.85    9.49
  10  10   5   50.14    6.48
  12  10   5   53.49    7.37
  14  10   5   -1.45    3.66
  16  10   5    0.71    4.56
  18  10   5    2.37    4.77
  20  10   5    6.50    6.89
 -23  11   5    9.35    7.42
 -21  11   5   -2.06    4.99
 -19  11   5    4.29    4.48
 -17  11   5  102.71   10.08
 -15  11   5   52.04    8.40
 -13  11   5  200.78   14.33
 -11  11   5  221.15   13.66
  -9  11   5   56.47    6.73
  -7  11   5  110.81    9.07
  -5  11   5   25.53    5.07
  -3  11   5   17.51    4.90
  -1  11   5  104.49    9.17
   1  11   5   69.11    8.98
   3  11   5    2.35    2.70
   5  11   5   -2.83    3.25
   7  11   5   99.35   10.43
   9  11   5   33.32    7.41
  11  11   5   16.06    6.54
  13  11   5   87.89   11.44
  15  11   5   69.55   11.02
  17  11   5    3.87    6.55
 -22  12   5   32.86   14.66
 -20  12   5   -5.83    8.91
 -18  12   5   27.38    7.08
 -16  12   5  306.92   17.21
 -14  12   5  430.97   20.48
 -12  12   5  592.76   24.35
 -10  12   5  371.61   18.53
  -8  12   5    9.74    4.21
  -6  12   5   38.59    6.11
  -4  12   5  148.01   10.27
  -2  12   5  167.34   11.01
   0  12   5  144.83   19.00
   2  12   5   89.39   10.79
   4  12   5   12.40    4.75
   6  12   5  162.44   12.12
   8  12   5  176.93   13.43
  10  12   5  253.39   16.31
  12  12   5   96.14   12.30
  14  12   5  137.76   14.76
  16  12   5    4.56    7.22
 -19  13   5    5.56    6.06
 -17  13   5   31.23    8.35
 -15  13   5  193.70   16.69
 -13  13   5  294.32   17.69
 -11  13   5  300.82   17.53
  -9  13   5  101.49    9.76
  -7  13   5   44.26    6.48
  -5  13   5   49.36    6.85
  -3  13   5   25.75    5.01
  -1  13   5   14.76    8.69
   1  13   5   26.66   10.09
   3  13   5   68.91   14.16
   5  13   5   25.87    5.87
   7  13   5  199.85   13.94
   9  13   5   76.50   10.54
  11  13   5  126.77   13.47
  13  13   5   54.70   10.49
  15  13   5   27.83    9.04
 -18  14   5    6.07    8.52
 -16  14   5   27.10    8.82
 -14  14   5    3.11    6.47
 -12  14   5   25.65    7.91
 -10  14   5   26.07    7.44
  -8  14   5   33.15    6.59
  -6  14   5   52.29    7.32
  -4  14   5   59.64    7.27
  -2  14   5   54.29    9.68
   0  14   5   65.05   10.21
   2  14   5   84.72   16.89
   4  14   5   32.91   12.97
   6  14   5   34.42   14.04
   8  14   5   19.60    7.11
  10  14   5    1.29    6.04
  12  14   5    6.16    6.99
 -15  15   5   11.33   11.52
 -13  15   5   20.47    7.97
 -11  15   5    1.01    6.47
  -9  15   5    2.28    5.64
  -7  15   5  164.14   12.47
  -5  15   5  100.43    9.42
  -3  15   5  309.72   20.51
  -1  15   5  217.12   18.68
   3  15   5  110.16   21.96
   5  15   5    9.83   12.98
   7  15   5    3.51   12.05
   9  15   5   -4.38    6.03
 -10  16   5   14.30    7.59
  -8  16   5   30.40    8.02
  -6  16   5   71.44    8.46
  -4  16   5  122.41   15.21
  -2  16   5  182.76   18.18
   4  16   5   38.58   16.83
 -30   0   6  190.59   21.12
 -28   0   6  440.28   20.36
 -26   0   6   98.17   11.21
 -24   0   6   23.91    6.12
 -22   0   6    3.04    3.42
 -20   0   6  225.90    9.43
 -18   0   6  637.03   18.82
 -16   0   6  226.46    9.55
 -14   0   6  163.62    7.75
 -12   0   6  173.34    7.56
 -10   0   6 2440.91   49.21
  -8   0   6 3832.67   73.52
  -6   0   6 5064.67  116.83
  -4   0   6 5094.56   94.69
  -2   0   6  821.27   15.69
   0   0   6  538.18   11.54
   2   0   6  634.37   13.41
   4   0   6  285.11    7.82
   6   0   6 2094.67   36.87
   8   0   6   47.86    3.64
  10   0   6  128.13    5.17
  12   0   6  753.87   26.18
  14   0   6  903.81   30.75
  16   0   6  994.48   51.08
  18   0   6  616.67   39.30
  20   0   6  292.97   33.93
  22   0   6  118.82   22.23
  24   0   6   -0.52    9.41
 -31   1   6   40.81    8.16
 -29   1   6  208.54   12.04
 -27   1   6   43.13    5.76
 -25   1   6   67.37    6.41
 -23   1   6   38.21    4.75
 -21   1   6   16.90    2.94
 -19   1   6   13.94    2.31
 -17   1   6  522.44   11.50
 -15   1   6   27.82    2.90
 -13   1   6  130.46    4.98
 -11   1   6  631.45   11.77
  -9   1   6 1919.18   28.01
  -7   1   6 2119.64   32.70
  -5   1   6 4455.84   64.96
  -3   1   6 1986.88   25.68
  -1   1   6  302.10    5.32
   1   1   6  112.38    3.33
   3   1   6    4.94    1.10
   5   1   6   46.01    2.56
   7   1   6   24.09    2.11
   9   1   6    2.07    0.91
  11   1   6  207.68    6.88
  13   1   6  331.06   11.32
  15   1   6  563.22   19.29
  17   1   6  433.51   22.41
  19   1   6  227.89   19.38
  21   1   6   71.10   12.03
  23   1   6   49.17   11.70
  25   1   6   -1.08    6.53
 -30   2   6    0.87    5.13
 -28   2   6    1.67    3.50
 -26   2   6    6.34    3.56
 -24   2   6   17.37    3.78
 -22   2   6  170.48    8.97
 -20   2   6  207.11    6.54
 -18   2   6  173.87    6.28
 -16   2   6  176.92    6.18
 -14   2   6  203.07    6.23
 -12   2   6  361.55    8.32
 -10   2   6   97.08    3.75
  -8   2   6    5.76    1.38
  -6   2   6    7.67    1.11
  -4   2   6  289.37    5.44
  -2   2   6   70.05    2.07
   0   2   6  407.90    6.77
   2   2   6  210.45    4.54
   4   2   6 1163.74   15.70
   6   2   6  889.98   13.71
   8   2   6  567.19    8.94
  10   2   6  158.17    4.96
  12   2   6   81.50    5.00
  14   2   6  111.03    9.45
  16   2   6   69.50    8.14
  18   2   6    6.22    5.42
  20   2   6   22.48    8.15
  22   2   6    9.43    7.39
  24   2   6   38.68   11.07
 -31   3   6   83.69   10.45
 -29   3   6   43.43    6.96
 -27   3   6   18.72    4.43
 -25   3   6    1.71    2.91
 -23   3   6   75.28    6.05
 -21   3   6  563.95   12.61
 -19   3   6  966.05   15.96
 -17   3   6  848.39   16.17
 -15   3   6  812.52   13.74
 -13   3   6   64.37    3.58
 -11   3   6    2.53    1.23
  -9   3   6   84.72    3.89
  -7   3   6  500.56    9.02
  -5   3   6 3334.47   49.86
  -3   3   6   59.19    2.67
  -1   3   6    9.45    1.14
   1   3   6  641.66   10.31
   3   3   6 2699.25   34.83
   5   3   6 2623.19   34.17
   7   3   6 1805.91   22.92
   9   3   6  824.01   14.65
  11   3   6   -1.02    1.63
  13   3   6   32.70    4.21
  15   3   6   73.53    8.13
  17   3   6   32.79    6.42
  19   3   6   20.27    7.33
  21   3   6    5.58    6.44
  23   3   6   59.84   12.89
 -30   4   6   54.59    8.64
 -28   4   6   11.52    4.50
 -26   4   6   10.45    3.88
 -24   4   6    2.55    3.18
 -22   4   6  131.10    7.51
 -20   4   6  382.57    9.89
 -18   4   6  693.93   12.61
 -16   4   6  698.88   14.00
 -14   4   6  365.30    8.01
 -12   4   6    3.81    1.34
 -10   4   6  141.28    3.92
  -8   4   6 2511.24   35.28
  -6   4   6 1009.05   17.60
  -4   4   6 2204.25   30.92
  -2   4   6    1.17    1.07
   0   4   6  304.66    6.35
   2   4   6 1326.53   20.13
   4   4   6 2012.42   27.06
   6   4   6 1557.04   20.19
   8   4   6  763.62   13.98
  10   4   6   47.61    3.50
  12   4   6  115.53    7.18
  14   4   6   62.00    5.92
  16   4   6   15.74    4.74
  18   4   6   81.46    9.60
  20   4   6   -2.90    6.02
  22   4   6   -3.04    6.46
  24   4   6   10.72    8.46
 -29   5   6    1.82    4.46
 -27   5   6    2.50    3.73
 -25   5   6   10.24    4.00
 -23   5   6   10.44    3.58
 -21   5   6    2.95    2.49
 -19   5   6   10.73    2.55
 -17   5   6   38.09    4.24
 -15   5   6    4.53    2.01
 -13   5   6   60.91    4.31
 -11   5   6   84.94    3.32
  -9   5   6    2.98    1.44
  -7   5   6  373.06    9.43
  -5   5   6    0.14    1.29
  -3   5   6    8.48    1.62
  -1   5   6    5.46    1.05
   1   5   6   -0.81    0.97
   3   5   6   92.12    4.15
   5   5   6   30.71    2.29
   7   5   6   95.58    5.63
   9   5   6   15.01    2.42
  11   5   6  306.42   10.69
  13   5   6   38.97    4.87
  15   5   6    3.56    2.94
  17   5   6    0.95    4.11
  19   5   6    5.94    5.14
  21   5   6    1.89    6.80
  23   5   6    4.88    7.15
 -28   6   6   34.73    7.24
 -26   6   6    8.44    4.11
 -24   6   6   16.45    3.92
 -22   6   6   37.73    4.87
 -20   6   6  218.89    7.70
 -18   6   6  469.79   10.78
 -16   6   6  250.25    7.46
 -14   6   6   37.98    3.72
 -12   6   6    1.22    1.34
 -10   6   6  170.44    5.67
  -8   6   6  237.51    7.37
  -6   6   6  192.77    6.37
  -4   6   6  722.45   13.45
  -2   6   6   88.27    4.00
   0   6   6   49.28    2.63
   2   6   6  323.51    7.22
   4   6   6  544.33    9.48
   6   6   6  751.48   15.38
   8   6   6  527.42   12.51
  10   6   6   35.79    3.94
  12   6   6    5.12    2.93
  14   6   6  166.26    9.39
  16   6   6   20.25    4.32
  18   6   6   41.65    7.75
  20   6   6    7.07    5.62
  22   6   6    6.13    7.14
 -27   7   6   40.71   10.73
 -25   7   6    9.68    5.73
 -23   7   6   56.68    6.41
 -21   7   6  285.98    9.00
 -19   7   6  490.50   12.23
 -17   7   6  732.19   13.86
 -15   7   6  324.93    8.49
 -13   7   6   44.74    3.88
 -11   7   6    3.18    1.81
  -9   7   6  230.62    7.53
  -7   7   6  894.62   18.44
  -5   7   6  742.67   13.97
  -3   7   6  294.68    7.41
  -1   7   6   -0.60    1.25
   1   7   6  681.44   11.03
   3   7   6 1279.32   20.09
   5   7   6 1712.84   29.05
   7   7   6  942.95   20.66
   9   7   6  705.25   17.76
  11   7   6   70.91    6.42
  13   7   6    2.55    2.89
  15   7   6   86.75    7.62
  17   7   6   62.70    6.71
  19   7   6   22.19    6.77
  21   7   6    2.44    5.87
 -26   8   6    7.04    5.68
 -24   8   6    0.95    5.16
 -22   8   6   78.56    8.33
 -20   8   6  214.96   14.33
 -18   8   6  234.29   10.52
 -16   8   6  236.27    9.98
 -14   8   6  202.74    8.30
 -12   8   6   26.02    3.84
 -10   8   6  236.16    8.36
  -8   8   6   87.47    6.83
  -6   8   6   26.62    3.82
  -4   8   6  129.65    4.88
  -2   8   6   48.67    3.52
   0   8   6   46.25    3.53
   2   8   6  441.69    9.05
   4   8   6  959.80   18.29
   6   8   6  349.31    9.65
   8   8   6  739.31   18.14
  10   8   6   25.26    4.20
  12   8   6   -0.14    3.08
  14   8   6   12.19    4.31
  16   8   6    2.29    4.16
  18   8   6    0.38    4.04
  20   8   6    7.62    7.55
 -25   9   6   10.28    6.16
 -23   9   6   -2.17    4.53
 -21   9   6    2.89    4.52
 -19   9   6    5.97    3.88
 -17   9   6    0.92    3.33
 -15   9   6    7.66    2.57
 -13   9   6    5.16    2.53
 -11   9   6  363.67   11.28
  -9   9   6  131.60    8.86
  -7   9   6  939.20   23.70
  -5   9   6  190.10    8.49
  -3   9   6  470.22   14.10
  -1   9   6  113.61    6.69
   1   9   6    4.84    1.91
   3   9   6   16.15    2.98
   5   9   6    7.38    2.59
   7   9   6   29.68    4.81
   9   9   6   51.06    6.52
  11   9   6   64.60    9.07
  13   9   6  107.26    9.90
  15   9   6   39.77    7.10
  17   9   6  129.84   11.79
  19   9   6   34.59   10.23
 -24  10   6    2.36    5.68
 -22  10   6   -5.11    4.79
 -20  10   6   51.08    7.04
 -18  10   6   85.80    7.98
 -16  10   6  110.07    7.16
 -14  10   6   -0.50    2.43
 -12  10   6   54.36    4.82
 -10  10   6  517.41   16.73
  -8  10   6  908.86   29.74
  -6  10   6 1252.73   37.28
  -4  10   6 1252.31   30.38
  -2  10   6  308.05   11.87
   0  10   6    9.88    2.96
   2  10   6   26.29    3.62
   4  10   6   95.78    6.73
   6  10   6   57.31    7.98
   8  10   6    7.10    4.76
  10  10   6   16.14    4.75
  12  10   6   54.66    7.38
  14  10   6  302.81   15.53
  16  10   6  252.41   15.37
  18  10   6  107.44   11.15
 -23  11   6    4.94    7.59
 -21  11   6    5.87    5.27
 -19  11   6   55.12    8.37
 -17  11   6   79.34    8.95
 -15  11   6   -3.01    4.05
 -13  11   6   -1.07    3.98
 -11  11   6  177.44   14.49
  -9  11   6  587.66   23.07
  -7  11   6  598.88   23.07
  -5  11   6  688.30   20.53
  -3  11   6  696.16   20.45
  -1  11   6   31.15    4.85
   1  11   6   -2.63    2.89
   3  11   6   24.64    3.97
   5  11   6   90.86    9.44
   7  11   6   29.04    6.45
   9  11   6    9.45    5.66
  11  11   6   47.59    9.09
  13  11   6  157.86   14.65
  15  11   6  236.24   17.60
  17  11   6  131.98   14.86
 -22  12   6   12.03   13.04
 -20  12   6    4.97   10.30
 -18  12   6   -2.95    4.71
 -16  12   6    5.04    5.33
 -14  12   6   21.82    6.61
 -12  12   6    3.62    5.20
 -10  12   6  152.44   13.83
  -8  12   6   58.79    8.83
  -6  12   6   56.71    8.37
  -4  12   6   52.70    6.77
  -2  12   6    4.75    3.55
   0  12   6   72.60   10.00
   2  12   6   11.96    4.70
   4  12   6   99.71    9.18
   6  12   6    2.01    4.45
   8  12   6   43.62    8.31
  10  12   6   32.86    8.29
  12  12   6   50.82    9.69
  14  12   6   21.95    7.99
  16  12   6   30.92    8.88
 -19  13   6  182.38   13.73
 -17  13   6   47.13    9.39
 -15  13   6  106.12   12.67
 -13  13   6   34.30    8.50
 -11  13   6    8.69    6.07
  -9  13   6    8.33    5.56
  -7  13   6   83.78   10.31
  -5  13   6   14.69    5.03
  -3  13   6   48.27    6.36
  -1  13   6   10.68    6.27
   1  13   6   52.25    9.25
   3  13   6  198.47   24.37
   5  13   6  321.84   15.34
   7  13   6  207.87   14.38
   9  13   6   77.11   10.55
  11  13   6   12.66    7.07
  13  13   6   -0.66    6.66
 -18  14   6  101.11   15.71
 -16  14   6   92.28   12.67
 -14  14   6   27.63    8.67
 -12  14   6    6.66    6.18
 -10  14   6   40.17    8.64
  -8  14   6   60.65    9.79
  -6  14   6  137.40   12.88
  -4  14   6   92.46    8.94
  -2  14   6    4.66    5.77
   0  14   6   16.58    7.34
   4  14   6  364.33   31.22
   6  14   6  190.84   25.83
   8  14   6  116.52   12.24
  10  14   6   29.00    8.33
 -13  15   6    2.40    6.43
 -11  15   6    6.31    6.98
  -9  15   6    2.27    6.12
  -7  15   6   41.18    8.32
  -5  15   6   23.26    6.70
  -3  15   6    5.58    9.21
  -1  15   6    4.37    9.01
   3  15   6   40.61   14.80
   5  15   6   77.45   18.48
   7  15   6    5.51   13.92
  -8  16   6    1.61    6.26
  -6  16   6    8.59    6.12
  -4  16   6   29.32   13.59
  -2  16   6    2.31   11.08
   0  16   6    4.55   13.57
 -30   0   7   -4.27    7.05
 -28   0   7    1.73    5.13
 -26   0   7   -1.44    4.37
 -24   0   7   -3.04    3.58
 -22   0   7    3.04    3.67
 -20   0   7   -2.30    2.54
 -18   0   7    1.00    2.41
 -16   0   7   -0.66    2.07
 -14   0   7   -0.49    1.95
 -12   0   7    0.94    1.81
 -10   0   7    0.35    1.76
  -8   0   7    0.98    2.22
  -6   0   7   -0.33    1.28
  -4   0   7   -0.66    0.74
  -2   0   7   -0.03    1.10
   0   0   7    4.17    1.51
   2   0   7    2.11    1.44
   4   0   7    2.89    1.54
   6   0   7    0.53    1.34
   8   0   7    1.89    1.53
  10   0   7    2.50    2.08
  12   0   7    1.70    3.33
  14   0   7    0.15    3.66
  16   0   7   -0.90    5.24
  18   0   7   -0.46    7.01
  20   0   7   -2.21    6.62
  22   0   7   -3.55    8.18
  24   0   7   -3.52   11.40
 -31   1   7   20.65    6.78
 -29   1   7    1.00    3.91
 -27   1   7    3.15    3.59
 -25   1   7  102.13    7.51
 -23   1   7  276.60    9.78
 -21   1   7  171.21    6.67
 -19   1   7   67.38    4.94
 -17   1   7   12.57    2.44
 -15   1   7  703.97   13.78
 -13   1   7 1051.52   17.94
 -11   1   7 2027.18   30.08
  -9   1   7  937.27   19.51
  -7   1   7  263.33    6.68
  -5   1   7  119.93    2.80
  -3   1   7  188.03    3.55
  -1   1   7 1514.44   19.32
   1   1   7 1194.64   18.55
   3   1   7  571.81    9.21
   5   1   7    7.72    1.39
   7   1   7   27.96    2.25
   9   1   7  219.46    5.57
  11   1   7  236.48    7.80
  13   1   7  359.32   12.35
  15   1   7  130.25   10.73
  17   1   7    7.00    5.86
  19   1   7   24.09    8.18
  21   1   7    7.40    7.07
  23   1   7   20.69    9.27
 -30   2   7   41.95    7.81
 -28   2   7   11.60    4.24
 -26   2   7   65.65    6.67
 -24   2   7  180.45    9.56
 -22   2   7  421.91   10.84
 -20   2   7  249.62    7.58
 -18   2   7    0.36    1.81
 -16   2   7  223.15    7.01
 -14   2   7  993.16   17.51
 -12   2   7 3125.22   40.64
 -10   2   7 2602.11   36.99
  -8   2   7 1048.81   18.54
  -6   2   7   56.33    2.44
  -4   2   7  251.69    5.28
  -2   2   7 1099.26   13.64
   0   2   7 1729.84   21.92
   2   2   7  703.90   10.71
   4   2   7  396.62    7.27
   6   2   7   67.54    3.58
   8   2   7  241.94    5.36
  10   2   7  376.18   10.17
  12   2   7  633.83   14.56
  14   2   7  217.92   12.08
  16   2   7  221.63   13.64
  18   2   7   16.92    7.21
  20   2   7   25.30    8.41
  22   2   7   81.53   14.55
  24   2   7   39.36   11.33
 -31   3   7   58.07    9.37
 -29   3   7    4.02    4.48
 -27   3   7   18.82    4.53
 -25   3   7   11.32    3.67
 -23   3   7   10.25    3.10
 -21   3   7   83.09    5.31
 -19   3   7    4.17    2.21
 -17   3   7   27.56    3.36
 -15   3   7  323.98    7.65
 -13   3   7  415.67    8.52
 -11   3   7 1548.39   22.10
  -9   3   7  148.39    5.23
  -7   3   7    9.64    1.40
  -5   3   7  137.18    4.29
  -3   3   7   35.01    2.41
  -1   3   7  173.33    3.74
   1   3   7  106.71    3.68
   3   3   7  171.82    4.40
   5   3   7    9.81    1.63
   7   3   7   35.16    2.43
   9   3   7   19.02    2.45
  11   3   7   58.28    4.84
  13   3   7  121.94    7.47
  15   3   7   89.28    9.04
  17   3   7    0.53    3.97
  19   3   7    7.47    6.12
  21   3   7   21.94    8.94
  23   3   7   34.72   11.00
 -30   4   7   18.26    5.75
 -28   4   7   11.21    4.29
 -26   4   7  244.33   11.84
 -24   4   7   79.32    6.47
 -22   4   7  233.15    8.52
 -20   4   7   58.49    4.30
 -18   4   7  104.85    6.14
 -16   4   7    1.83    1.95
 -14   4   7    9.49    1.81
 -12   4   7   21.86    2.56
 -10   4   7 1027.30   16.79
  -8   4   7   46.34    2.80
  -6   4   7   91.57    4.06
  -4   4   7  579.08    9.84
  -2   4   7  176.78    5.11
   0   4   7 1353.80   20.63
   2   4   7  488.59   10.46
   4   4   7  197.79    5.22
   6   4   7   58.25    3.07
   8   4   7   71.40    4.44
  10   4   7  155.59    7.11
  12   4   7   15.36    3.55
  14   4   7    6.29    3.10
  16   4   7    6.03    4.46
  18   4   7   -1.76    4.12
  20   4   7    5.12    6.56
  22   4   7   -2.03    6.83
 -29   5   7    4.35    4.60
 -27   5   7   67.55    6.75
 -25   5   7  440.06   13.46
 -23   5   7  491.10   13.51
 -21   5   7  602.04   13.34
 -19   5   7  256.52    7.85
 -17   5   7   -0.03    1.77
 -15   5   7   50.29    3.69
 -13   5   7  570.37   10.91
 -11   5   7  756.33   12.16
  -9   5   7 1375.60   23.51
  -7   5   7   98.61    4.51
  -5   5   7   21.73    2.22
  -3   5   7 1563.93   25.53
  -1   5   7 2106.83   27.50
   1   5   7 1586.28   25.98
   3   5   7  943.72   15.88
   5   5   7  112.91    4.03
   7   5   7    7.46    2.02
   9   5   7  632.44   12.93
  11   5   7   22.71    4.12
  13   5   7  463.20   14.36
  15   5   7   69.84    6.73
  17   5   7    0.34    4.13
  19   5   7    4.65    5.07
  21   5   7   25.10    9.95
  23   5   7   52.22   12.65
 -28   6   7   12.61    5.62
 -26   6   7  107.94    8.02
 -24   6   7  206.35   10.41
 -22   6   7  371.17   11.39
 -20   6   7  276.95    8.51
 -18   6   7   30.73    3.78
 -16   6   7   14.81    2.74
 -14   6   7  175.30    6.52
 -12   6   7  163.21    5.79
 -10   6   7  449.70   11.43
  -8   6   7  206.94    7.01
  -6   6   7  159.35    6.03
  -4   6   7   39.47    3.14
  -2   6   7 1626.29   26.79
   0   6   7  776.63   12.11
   2   6   7  575.65   11.01
   4   6   7  499.47   11.05
   6   6   7   36.57    3.72
   8   6   7   27.13    3.15
  10   6   7  148.11    8.43
  12   6   7   95.78    7.41
  14   6   7  132.83    9.23
  16   6   7    8.33    3.98
  18   6   7   -0.84    4.81
  20   6   7   13.69    6.77
  22   6   7   24.54    9.98
 -27   7   7   -6.72    6.28
 -25   7   7   23.93    6.69
 -23   7   7    2.28    3.22
 -21   7   7    7.19    2.93
 -19   7   7   23.92    3.44
 -17   7   7   -1.28    2.08
 -15   7   7   88.45    6.61
 -13   7   7  215.05    7.06
 -11   7   7   44.44    3.80
  -9   7   7   -2.73    1.48
  -7   7   7   49.11    4.16
  -5   7   7   20.10    2.50
  -3   7   7    5.95    1.72
  -1   7   7    8.43    1.94
   1   7   7    2.88    1.41
   3   7   7   37.02    3.05
   5   7   7   14.00    2.65
   7   7   7  122.71    6.92
   9   7   7  182.15    9.08
  11   7   7   97.23    7.59
  13   7   7   15.93    4.19
  15   7   7   11.60    4.01
  17   7   7    4.12    3.86
  19   7   7   -2.09    4.98
  21   7   7   -3.66    5.57
 -28   8   7    4.69    6.83
 -26   8   7    0.32    5.61
 -24   8   7  102.95   11.53
 -22   8   7  129.85   10.57
 -20   8   7   96.65    8.80
 -18   8   7   -0.61    3.08
 -16   8   7   87.07    8.33
 -14   8   7  532.83   14.24
 -12   8   7 2058.66   38.50
 -10   8   7  151.90    8.04
  -8   8   7  204.64    9.10
  -6   8   7    8.93    2.30
  -4   8   7  183.73    6.79
  -2   8   7  207.32    6.55
   0   8   7  250.24    7.37
   2   8   7  287.59    7.20
   4   8   7   39.06    3.83
   6   8   7   45.20    4.37
   8   8   7    6.14    2.59
  10   8   7  107.37    8.11
  12   8   7  264.36   11.19
  14   8   7  247.61   12.64
  16   8   7   38.43    6.96
  18   8   7   -4.94    4.52
  20   8   7   19.84    9.08
 -25   9   7   76.34   10.67
 -23   9   7  155.60   11.91
 -21   9   7  182.12   14.02
 -19   9   7   60.28    6.89
 -17   9   7   -1.03    3.15
 -15   9   7  102.49    7.26
 -13   9   7  993.03   22.21
 -11   9   7  681.69   19.73
  -9   9   7  744.28   20.58
  -7   9   7    4.36    3.03
  -5   9   7   77.97    6.69
  -3   9   7  142.68    7.76
  -1   9   7  630.56   16.29
   1   9   7  275.22    9.34
   3   9   7  265.70    7.63
   5   9   7   -0.17    2.36
   7   9   7    9.31    3.70
   9   9   7   72.78    7.86
  11   9   7  281.44   13.45
  13   9   7  150.67   11.83
  15   9   7  133.17   11.72
  17   9   7   28.02    6.91
  19   9   7   16.01    5.93
 -24  10   7   25.93    7.66
 -22  10   7   10.12    5.97
 -20  10   7   36.84    6.22
 -18  10   7    5.06    3.88
 -16  10   7   -1.71    2.46
 -14  10   7   26.41    3.86
 -12  10   7   59.81    6.75
 -10  10   7  117.08    9.09
  -8  10   7   30.51    6.22
  -6  10   7   26.30    5.93
  -4  10   7    5.17    3.97
  -2  10   7   10.72    4.53
   0  10   7   81.08    7.08
   2  10   7    1.44    2.57
   4  10   7   23.67    4.31
   6  10   7    0.84    3.94
   8  10   7   27.32    6.24
  10  10   7   17.50    5.17
  12  10   7   21.09    5.65
  14  10   7   19.34    5.77
  16  10   7   12.95    6.20
  18  10   7   10.64    6.40
 -23  11   7    5.96    7.82
 -21  11   7   10.48    5.94
 -19  11   7   -4.47    4.06
 -17  11   7   13.61    5.16
 -15  11   7   47.50    7.97
 -13  11   7  203.40   13.43
 -11  11   7  118.60   11.69
  -9  11   7  127.74   12.22
  -7  11   7   17.30    5.95
  -5  11   7    7.55    4.67
  -3  11   7   31.33    6.62
  -1  11   7   62.46    7.89
   1  11   7  143.33    8.33
   3  11   7   17.51    5.83
   5  11   7   49.98    7.59
   7  11   7    0.09    4.48
   9  11   7   28.09    7.27
  11  11   7   53.93    9.58
  13  11   7   21.18    7.92
  15  11   7   18.30    7.86
  17  11   7    1.39    9.84
 -22  12   7   95.79   20.57
 -20  12   7    6.83   10.51
 -18  12   7    6.26    5.42
 -16  12   7   92.10   10.94
 -14  12   7  249.12   15.67
 -12  12   7  439.81   20.74
 -10  12   7  376.02   18.93
  -8  12   7  205.36   14.63
  -6  12   7    0.52    4.29
  -4  12   7   63.16    8.83
  -2  12   7  205.55   12.94
   0  12   7  291.24   13.57
   2  12   7  193.52   16.05
   4  12   7   57.21    7.20
   6  12   7    2.18    4.58
   8  12   7   17.38    6.61
  10  12   7  129.52   13.81
  12  12   7  137.90   14.61
  14  12   7   52.22   10.79
 -19  13   7   -1.26    5.39
 -17  13   7    5.92    6.14
 -15  13   7   68.64   10.47
 -13  13   7  159.91   15.00
 -11  13   7  243.36   17.35
  -9  13   7   84.85   11.03
  -7  13   7   63.42    9.20
  -5  13   7   -2.82    3.87
  -3  13   7   20.62    5.91
  -1  13   7   76.36   15.55
   1  13   7   71.01   15.06
   3  13   7   28.68   11.49
   5  13   7   -1.61    9.79
   7  13   7   18.16    6.68
   9  13   7   15.10    6.53
  11  13   7   70.67   10.88
  13  13   7   33.75    9.41
 -16  14   7    0.48    6.58
 -14  14   7   -0.86    6.25
 -12  14   7    3.07    6.30
 -10  14   7    6.32    6.55
  -8  14   7    1.63    5.26
  -6  14   7    2.14    5.11
  -4  14   7   19.20    6.42
  -2  14   7   19.67   10.30
   0  14   7   26.61   12.69
   4  14   7    9.16   11.65
   6  14   7    4.35   10.86
   8  14   7   13.24    6.76
  10  14   7    3.82    6.50
 -13  15   7  130.20   15.24
 -11  15   7   18.14    7.52
  -9  15   7   70.27   10.99
  -7  15   7    4.87    6.12
  -5  15   7    0.89    5.32
  -3  15   7   84.81   18.10
  -1  15   7  176.07   24.86
   1  15   7  164.65   31.01
   3  15   7   61.57   19.30
   5  15   7    6.67   13.04
   7  15   7    1.93   12.29
  -8  16   7    3.08    6.20
  -6  16   7    4.33    6.02
  -4  16   7   40.23   14.31
  -2  16   7   53.10   16.36
   0  16   7  158.11   24.52
 -30   0   8  207.79   21.68
 -28   0   8  648.44   24.88
 -26   0   8  604.96   22.74
 -24   0   8  363.70   16.50
 -22   0   8   66.07    6.62
 -20   0   8    9.73    3.75
 -18   0   8  178.17    9.77
 -16   0   8   26.50    4.38
 -14   0   8  334.29   12.06
 -12   0   8   53.76    5.40
 -10   0   8  562.22   19.75
  -8   0   8 3673.29   88.61
  -6   0   8 5843.68  109.47
  -4   0   8 5918.73   84.84
  -2   0   8 3503.16   58.50
   0   0   8 2579.68   44.55
   2   0   8  121.17    5.35
   4   0   8    9.43    2.18
   6   0   8  382.38   12.14
   8   0   8   63.92    4.85
  10   0   8    1.32    2.15
  12   0   8  186.62    8.61
  14   0   8  279.11   16.12
  16   0   8  530.95   36.89
  18   0   8  424.79   34.49
  20   0   8  287.71   34.31
  22   0   8   57.56   18.04
 -31   1   8   70.47    9.74
 -29   1   8  215.21   11.90
 -27   1   8  353.77   12.50
 -25   1   8  269.20   10.46
 -23   1   8  208.08    9.27
 -21   1   8   -0.41    1.96
 -19   1   8   18.09    2.96
 -17   1   8   23.34    3.12
 -15   1   8   -0.62    1.41
 -13   1   8   50.06    3.70
 -11   1   8  578.09   12.76
  -9   1   8 1598.93   26.51
  -7   1   8 1723.73   28.20
  -5   1   8 2575.97   30.85
  -3   1   8 1839.15   21.48
  -1   1   8 2497.57   30.52
   1   1   8  902.05   14.04
   3   1   8  107.32    3.85
   5   1   8   54.01    3.11
   7   1   8    2.43    1.24
   9   1   8   15.85    2.07
  11   1   8   47.96    4.46
  13   1   8  212.93   10.35
  15   1   8  336.44   15.30
  17   1   8  303.18   19.76
  19   1   8  270.09   22.72
  21   1   8   73.40   13.48
  23   1   8   35.71   10.86
 -30   2   8    0.82    5.12
 -28   2   8    5.99    3.70
 -26   2   8   42.10    5.46
 -24   2   8    9.51    3.33
 -22   2   8   48.71    4.29
 -20   2   8  328.11    9.59
 -18   2   8  680.92   14.40
 -16   2   8  359.62    9.35
 -14   2   8  701.20   13.82
 -12   2   8  156.78    4.70
 -10   2   8  437.92   10.11
  -8   2   8  119.74    4.79
  -6   2   8  133.04    3.68
  -4   2   8   37.44    2.52
  -2   2   8  534.66    7.91
   0   2   8 1098.45   15.26
   2   2   8   65.99    3.28
   4   2   8  542.76    9.33
   6   2   8  377.74    8.00
   8   2   8  583.15   10.80
  10   2   8  370.72   10.51
  12   2   8  171.05    7.49
  14   2   8   26.44    4.13
  16   2   8   93.95   10.14
  18   2   8   16.49    7.41
  20   2   8    9.59    7.50
  22   2   8    1.45    6.94
 -31   3   8   25.97    6.89
 -29   3   8   51.25    7.25
 -27   3   8   51.95    6.07
 -25   3   8    0.79    2.75
 -23   3   8    2.29    2.43
 -21   3   8  303.05    8.77
 -19   3   8  988.91   18.96
 -17   3   8 1475.96   24.94
 -15   3   8 1088.09   19.34
 -13   3   8 1607.02   23.37
 -11   3   8   33.81    3.03
  -9   3   8   25.30    2.82
  -7   3   8    5.73    1.24
  -5   3   8 2356.57   31.09
  -3   3   8  221.73    5.39
  -1   3   8   35.30    2.14
   1   3   8  127.76    4.17
   3   3   8  532.37    9.23
   5   3   8 2203.80   30.12
   7   3   8 1227.27   18.73
   9   3   8  867.05   16.10
  11   3   8  530.83   13.44
  13   3   8    8.33    3.11
  15   3   8   14.13    3.52
  17   3   8    3.95    4.46
  19   3   8    1.26    5.44
  21   3   8   39.93   10.77
  23   3   8   26.03   10.91
 -30   4   8   43.40    7.07
 -28   4   8   95.01    8.01
 -26   4   8   56.67    6.30
 -24   4   8   12.08    3.74
 -22   4   8   12.57    3.16
 -20   4   8  258.86    8.61
 -18   4   8  936.10   18.09
 -16   4   8  721.25   14.71
 -14   4   8 1290.44   19.99
 -12   4   8   91.30    4.95
 -10   4   8  202.52    7.62
  -8   4   8  230.75    6.19
  -6   4   8  498.17   11.12
  -4   4   8  542.45    9.71
  -2   4   8  949.37   14.89
   0   4   8    0.89    1.06
   2   4   8  250.38    6.07
   4   4   8  533.19   10.03
   6   4   8 1602.41   23.25
   8   4   8  569.90   12.04
  10   4   8  557.68   13.81
  12   4   8   21.39    4.16
  14   4   8   11.35    3.58
  16   4   8   88.67    7.26
  18   4   8   60.09    9.26
  20   4   8    0.58    7.01
  22   4   8    4.35    8.63
 -29   5   8    9.66    4.83
 -27   5   8    4.53    3.65
 -25   5   8    4.11    3.50
 -23   5   8    9.41    3.28
 -21   5   8   -0.65    2.30
 -19   5   8   52.72    4.75
 -17   5   8   34.56    4.19
 -15   5   8   32.58    3.12
 -13   5   8   84.56    5.02
 -11   5   8    2.53    1.31
  -9   5   8   11.76    2.04
  -7   5   8    4.95    1.71
  -5   5   8    3.67    1.45
  -3   5   8   31.00    2.74
  -1   5   8   95.19    3.42
   1   5   8    2.15    1.25
   3   5   8   13.69    2.04
   5   5   8   41.42    3.19
   7   5   8  132.67    4.85
   9   5   8   41.32    4.39
  11   5   8    0.42    2.54
  13   5   8    0.09    2.83
  15   5   8   21.12    4.56
  17   5   8   12.11    5.43
  19   5   8    3.35    5.16
  21   5   8   -4.64    7.07
 -28   6   8   31.16    6.59
 -26   6   8   33.57    5.41
 -24   6   8   -5.03    2.80
 -22   6   8   15.16    3.15
 -20   6   8   90.66    6.37
 -18   6   8  382.47   11.48
 -16   6   8  525.57   12.00
 -14   6   8  206.32    7.84
 -12   6   8  206.26    6.60
 -10   6   8   33.45    3.67
  -8   6   8  238.90    7.87
  -6   6   8  387.62    9.01
  -4   6   8  339.53    8.50
  -2   6   8  298.01    8.01
   0   6   8   22.63    2.06
   2   6   8  206.91    6.55
   4   6   8  307.32    7.25
   6   6   8  328.10    7.58
   8   6   8  911.68   17.26
  10   6   8    4.65    3.04
  12   6   8   27.53    4.67
  14   6   8    6.14    3.86
  16   6   8   18.22    4.90
  18   6   8   25.94    7.38
  20   6   8    4.34    6.03
 -29   7   8   54.69   17.90
 -27   7   8   54.79   11.83
 -25   7   8    7.24    5.36
 -23   7   8    4.31    3.34
 -21   7   8   70.87    5.44
 -19   7   8  503.99   12.60
 -17   7   8  739.78   17.18
 -15   7   8  843.60   19.92
 -13   7   8  697.88   14.71
 -11   7   8  360.86   10.43
  -9   7   8   -0.20    1.90
  -7   7   8  384.68   10.70
  -5   7   8  540.23   13.30
  -3   7   8  516.12   11.51
  -1   7   8   52.18    4.06
   1   7   8   77.69    4.26
   3   7   8  396.85    9.09
   5   7   8  982.98   18.61
   7   7   8 1193.60   21.07
   9   7   8  522.87   15.30
  11   7   8  112.84    8.54
  13   7   8    5.45    3.46
  15   7   8    6.44    3.83
  17   7   8   33.24    5.79
  19   7   8   27.73    7.53
 -28   8   8    3.78    7.67
 -26   8   8   -0.17    5.47
 -24   8   8   -4.42    4.39
 -22   8   8   21.97    5.47
 -20   8   8  152.45   10.77
 -18   8   8  392.58   15.68
 -16   8   8  211.29   10.92
 -14   8   8 1115.41   23.91
 -12   8   8   84.22    7.09
 -10   8   8   72.13    6.60
  -8   8   8   23.29    3.44
  -6   8   8    1.70    1.99
  -4   8   8  102.53    5.87
  -2   8   8    1.67    1.88
   0   8   8   62.61    4.56
   2   8   8  177.00    5.78
   4   8   8  794.07   14.72
   6   8   8  594.28   14.24
   8   8   8   81.06    6.71
  10   8   8  216.99   10.30
  12   8   8   82.00    7.73
  14   8   8    0.60    3.73
  16   8   8   10.16    5.41
  18   8   8    0.81    5.09
 -27   9   8   74.06   19.63
 -25   9   8   70.89   10.60
 -23   9   8   10.99    5.14
 -21   9   8   27.88    5.88
 -19   9   8    2.59    3.76
 -17   9   8   -0.30    3.90
 -15   9   8   48.43    5.20
 -13   9   8  237.97   10.81
 -11   9   8   47.16    5.84
  -9   9   8  158.78    9.64
  -7   9   8  481.79   15.58
  -5   9   8  399.91   13.64
  -3   9   8  546.98   16.44
  -1   9   8  296.43    9.81
   1   9   8  217.08    8.34
   3   9   8  119.83    5.70
   5   9   8   58.16    5.72
   7   9   8    6.37    3.70
   9   9   8   -1.13    3.05
  11   9   8   61.12    7.97
  13   9   8   87.74    9.61
  15   9   8   33.07    6.91
  17   9   8   68.26    9.48
 -24  10   8   96.79   10.52
 -22  10   8   -1.92    4.30
 -20  10   8    1.94    4.20
 -18  10   8   30.77    5.46
 -16  10   8   72.80    5.86
 -14  10   8    6.51    3.70
 -12  10   8   33.36    5.49
 -10  10   8  231.30   11.02
  -8  10   8  326.39   16.22
  -6  10   8 1272.10   38.41
  -4  10   8 1135.58   35.12
  -2  10   8  809.28   27.16
   0  10   8  482.02   15.76
   2  10   8   82.13    7.00
   4  10   8    2.11    3.26
   6  10   8   54.77    8.07
   8  10   8  123.68   10.52
  10  10   8    1.27    4.15
  12  10   8    8.10    4.44
  14  10   8  145.21   12.53
  16  10   8  184.11   14.26
 -23  11   8   65.68   10.25
 -21  11   8    6.72    5.49
 -19  11   8    2.67    4.08
 -17  11   8   60.06    7.92
 -15  11   8    3.06    4.56
 -13  11   8    2.53    4.54
 -11  11   8   74.31    9.79
  -9  11   8  244.63   14.68
  -7  11   8  563.19   22.67
  -5  11   8  766.61   27.29
  -3  11   8  544.63   21.60
  -1  11   8  634.69   23.11
   1  11   8   43.14    5.62
   3  11   8   19.39    6.61
   5  11   8   20.79    5.78
   7  11   8   39.96    7.89
   9  11   8    6.63    5.71
  11  11   8    5.72    6.06
  13  11   8   94.09   12.27
  15  11   8   87.32   12.62
 -22  12   8   11.91   12.37
 -20  12   8   14.09   11.69
 -18  12   8    6.98   10.40
 -16  12   8   37.42    7.98
 -14  12   8   34.27    7.70
 -12  12   8   38.60    7.89
 -10  12   8   71.88    9.97
  -8  12   8  104.21   11.57
  -6  12   8   68.77    9.33
  -4  12   8   30.08    6.72
  -2  12   8   74.23    9.05
   0  12   8   65.09    7.68
   2  12   8   19.98    7.03
   4  12   8   67.21   15.91
   6  12   8   16.28    6.12
   8  12   8   20.53    7.02
  10  12   8   23.09    7.94
  12  12   8   39.49    9.36
  14  12   8   23.74    8.87
 -19  13   8  161.53   25.45
 -17  13   8  188.93   16.15
 -15  13   8  145.64   14.79
 -13  13   8   96.61   11.86
 -11  13   8   48.08    9.32
  -9  13   8    2.23    5.24
  -7  13   8    9.65    5.19
  -5  13   8   76.59   10.06
  -3  13   8   13.17    5.72
  -1  13   8    1.86    3.97
   1  13   8   24.40   10.61
   3  13   8   47.42   13.77
   5  13   8  201.78   27.45
   7  13   8  197.80   14.21
   9  13   8  164.84   15.34
  11  13   8   38.20    9.30
 -16  14   8  154.81   15.60
 -14  14   8  103.42   13.07
 -12  14   8   40.88    9.23
 -10  14   8    1.15    5.89
  -8  14   8   16.06    6.91
  -6  14   8  149.17   14.11
  -4  14   8  103.54   10.87
  -2  14   8   47.22   14.85
   0  14   8    1.37    9.27
   2  14   8   14.06   10.89
   4  14   8   83.87   18.84
   6  14   8  168.65   26.36
   8  14   8  247.13   16.01
 -13  15   8    9.56    7.68
 -11  15   8   -1.94    6.50
  -9  15   8    1.26    6.47
  -7  15   8    6.95    5.92
  -5  15   8   25.19    7.33
  -3  15   8    7.01   10.87
  -1  15   8   13.04   11.84
   1  15   8   19.75   12.49
   5  15   8   31.37   14.77
  -4  16   8   13.65   12.46
 -30   0   9   -3.00    7.27
 -28   0   9   -3.49    4.85
 -26   0   9    8.07    5.09
 -24   0   9   -0.53    3.86
 -22   0   9    0.79    3.23
 -20   0   9   -0.92    2.78
 -18   0   9    2.55    2.86
 -16   0   9   -0.16    2.13
 -14   0   9    0.75    2.14
 -12   0   9   -4.13    1.57
 -10   0   9   -1.07    2.37
  -8   0   9    1.67    1.63
  -6   0   9    2.41    1.66
  -4   0   9   -0.17    0.96
  -2   0   9    0.09    1.38
   0   0   9    2.38    1.63
   2   0   9    4.68    1.90
   4   0   9    4.82    1.92
   6   0   9    0.70    1.73
   8   0   9   -0.79    1.71
  10   0   9   -0.92    2.31
  12   0   9    2.21    2.68
  14   0   9   10.69    5.41
  16   0   9    8.48    8.15
  18   0   9    3.36    8.62
  20   0   9    1.67    9.39
  22   0   9   -0.65    9.25
 -31   1   9   62.23    9.60
 -29   1   9    2.22    4.14
 -27   1   9    2.75    3.46
 -25   1   9  103.77    7.82
 -23   1   9  348.57   10.88
 -21   1   9  232.43    8.47
 -19   1   9  419.41   10.96
 -17   1   9  164.97    6.94
 -15   1   9    1.62    1.64
 -13   1   9  424.94   10.97
 -11   1   9 1092.24   19.93
  -9   1   9  460.19   10.52
  -7   1   9  540.35   10.28
  -5   1   9   59.28    2.54
  -3   1   9   37.99    2.10
  -1   1   9  788.77   11.95
   1   1   9 1654.76   23.43
   3   1   9 1082.49   15.75
   5   1   9  170.41    4.86
   7   1   9   85.49    4.18
   9   1   9   19.93    2.85
  11   1   9   49.99    3.98
  13   1   9  187.39    8.08
  15   1   9  102.84   10.38
  17   1   9    1.02    5.66
  19   1   9    7.31    7.21
  21   1   9    6.66    7.52
 -30   2   9   63.52    9.01
 -28   2   9    7.24    3.82
 -26   2   9   48.12    5.72
 -24   2   9  309.15   10.74
 -22   2   9  473.82   12.49
 -20   2   9  610.88   14.11
 -18   2   9  532.99   12.50
 -16   2   9   36.41    3.79
 -14   2   9   26.16    3.04
 -12   2   9  919.96   17.86
 -10   2   9 1246.95   22.38
  -8   2   9  729.05   14.78
  -6   2   9  514.86    8.30
  -4   2   9   54.69    3.18
  -2   2   9  243.16    4.85
   0   2   9 3127.54   38.05
   2   2   9 1163.47   16.64
   4   2   9 1177.99   18.20
   6   2   9  284.99    6.55
   8   2   9   24.57    2.61
  10   2   9   33.52    3.31
  12   2   9  214.98    8.71
  14   2   9   77.73    6.44
  16   2   9   29.05    6.46
  18   2   9    7.02    6.66
  20   2   9   10.63    7.89
  22   2   9   29.91   10.84
 -31   3   9   22.91    6.87
 -29   3   9    1.92    4.17
 -27   3   9    4.24    3.54
 -25   3   9   13.05    3.74
 -23   3   9  135.54    7.99
 -21   3   9  108.23    6.89
 -19   3   9  131.06    7.17
 -17   3   9  146.16    6.93
 -15   3   9    1.91    1.88
 -13   3   9    6.24    1.88
 -11   3   9  263.63    7.90
  -9   3   9    1.40    1.43
  -7   3   9  319.46    6.72
  -5   3   9   67.64    3.56
  -3   3   9  357.64    7.54
  -1   3   9  282.33    5.52
   1   3   9 1149.88   17.56
   3   3   9  217.04    5.52
   5   3   9  259.93    6.66
   7   3   9   87.37    4.53
   9   3   9   15.10    2.51
  11   3   9    2.02    2.33
  13   3   9    2.39    2.94
  15   3   9   14.63    4.00
  17   3   9    3.81    4.74
  19   3   9   13.42    7.80
  21   3   9   17.46    8.85
 -30   4   9   10.55    5.08
 -28   4   9   23.23    5.16
 -26   4   9    0.85    3.27
 -24   4   9   16.62    3.51
 -22   4   9   31.88    4.03
 -20   4   9   95.60    6.40
 -18   4   9   25.44    3.56
 -16   4   9   13.39    2.77
 -14   4   9  309.70    8.41
 -12   4   9  379.10   10.14
 -10   4   9 1130.18   21.22
  -8   4   9  751.06   12.54
  -6   4   9   68.21    3.46
  -4   4   9  160.29    4.78
  -2   4   9   11.26    1.92
   0   4   9   25.92    2.30
   2   4   9    3.53    1.43
   4   4   9    4.75    1.59
   6   4   9    7.01    1.78
   8   4   9   11.04    2.08
  10   4   9  226.39    8.61
  12   4   9  192.88   10.49
  14   4   9  248.60   11.25
  16   4   9  149.36    9.23
  18   4   9   52.36    9.14
  20   4   9   16.29    7.31
 -29   5   9   23.19    5.55
 -27   5   9   12.85    4.20
 -25   5   9   11.67    4.10
 -23   5   9  251.53    9.24
 -21   5   9  332.03   10.36
 -19   5   9  322.79    9.80
 -17   5   9  160.46    7.48
 -15   5   9  147.64    7.27
 -13   5   9 1551.99   28.02
 -11   5   9 1945.05   27.02
  -9   5   9 1523.54   24.29
  -7   5   9 1557.03   24.75
  -5   5   9   59.83    3.63
  -3   5   9   19.33    2.53
  -1   5   9  103.98    3.58
   1   5   9  345.04    7.64
   3   5   9  301.92    7.27
   5   5   9  170.08    5.47
   7   5   9  132.46    5.31
   9   5   9  266.73    9.39
  11   5   9  273.67   11.07
  13   5   9  562.68   17.06
  15   5   9  389.49   14.15
  17   5   9  186.27   15.01
  19   5   9   59.76    9.89
  21   5   9   -6.35    5.59
 -28   6   9   18.72    6.12
 -26   6   9   -3.50    3.24
 -24   6   9   11.36    3.50
 -22   6   9   96.53    6.91
 -20   6   9  166.19    9.33
 -18   6   9   54.78    6.18
 -16   6   9  311.89    9.95
 -14   6   9 1236.45   21.83
 -12   6   9  693.79   13.64
 -10   6   9 1629.33   26.11
  -8   6   9  554.76   12.65
  -6   6   9  608.87   14.64
  -4   6   9    3.82    1.60
  -2   6   9   24.03    2.75
   0   6   9   98.73    4.56
   2   6   9  213.92    6.00
   4   6   9   44.78    3.47
   6   6   9   15.23    2.39
   8   6   9   38.63    4.50
  10   6   9   30.75    4.84
  12   6   9  441.60   14.89
  14   6   9  228.08   12.21
  16   6   9  179.75   11.00
  18   6   9   97.82   11.67
  20   6   9   -7.32    5.57
 -27   7   9   20.90    9.47
 -25   7   9    6.57    5.75
 -23   7   9   35.58    4.99
 -21   7   9   14.54    3.27
 -19   7   9    0.86    3.18
 -17   7   9    0.41    2.60
 -15   7   9  105.64    6.85
 -13   7   9    3.01    2.19
 -11   7   9   91.79    6.15
  -9   7   9    1.00    1.98
  -7   7   9    0.18    1.95
  -5   7   9   56.88    4.88
  -3   7   9   10.12    2.22
  -1   7   9  107.30    5.96
   1   7   9   63.47    4.00
   3   7   9  198.95    7.03
   5   7   9  245.33    6.85
   7   7   9   11.95    2.89
   9   7   9  104.76    8.13
  11   7   9    6.04    3.53
  13   7   9   66.73    7.28
  15   7   9   10.55    4.52
  17   7   9   20.02    5.36
  19   7   9    3.36    6.16
 -28   8   9   -4.55    6.40
 -26   8   9   15.69    6.80
 -24   8   9  148.00   11.74
 -22   8   9  262.91   14.96
 -20   8   9  262.49   14.90
 -18   8   9  162.89   10.76
 -16   8   9    8.06    4.14
 -14   8   9    1.49    2.85
 -12   8   9  288.82   11.56
 -10   8   9  580.20   17.53
  -8   8   9   53.49    4.78
  -6   8   9  169.93    7.20
  -4   8   9   50.66    4.68
  -2   8   9  246.08    7.89
   0   8   9  494.92   12.01
   2   8   9  830.34   15.29
   4   8   9  478.55   10.73
   6   8   9  134.75    7.63
   8   8   9   16.90    3.96
  10   8   9   14.85    4.37
  12   8   9   39.38    6.10
  14   8   9   48.18    7.22
  16   8   9    6.58    5.58
  18   8   9   -2.46    4.83
 -25   9   9   45.23    9.20
 -23   9   9  160.12   12.07
 -21   9   9  210.52   13.39
 -19   9   9  269.79   11.59
 -17   9   9   44.85    6.87
 -15   9   9    1.30    3.02
 -13   9   9   41.63    5.64
 -11   9   9  633.05   19.10
  -9   9   9  576.20   17.88
  -7   9   9  189.53    9.55
  -5   9   9    3.33    3.00
  -3   9   9   70.89    6.70
  -1   9   9  520.92   14.22
   1   9   9  502.05   12.62
   3   9   9  331.58    9.28
   5   9   9  306.12   11.13
   7   9   9    6.19    3.31
   9   9   9    7.41    4.18
  11   9   9   22.05    5.88
  13   9   9  116.71   11.24
  15   9   9   16.20    6.52
  17   9   9   19.54    7.14
 -24  10   9   19.38    6.38
 -22  10   9   16.70    5.62
 -20  10   9   11.51    4.34
 -18  10   9   15.35    4.70
 -16  10   9    3.38    3.60
 -14  10   9    1.56    3.27
 -12  10   9    4.43    3.60
 -10  10   9   30.74    5.39
  -8  10   9   17.38    5.50
  -6  10   9   58.74    8.22
  -4  10   9   19.91    5.65
  -2  10   9    3.83    4.10
   0  10   9  116.51    9.00
   2  10   9   38.76    5.30
   4  10   9   36.86    5.45
   6  10   9   16.10    5.35
   8  10   9   -2.27    3.90
  10  10   9   34.34    6.44
  12  10   9   16.15    5.99
  14  10   9    9.35    5.75
  16  10   9    7.32    6.40
 -23  11   9   14.97    7.23
 -21  11   9   73.52    8.67
 -19  11   9   55.33   10.20
 -17  11   9   -4.70    3.74
 -15  11   9   -4.08    4.13
 -13  11   9   51.09    8.60
 -11  11   9  104.23   11.02
  -9  11   9  217.62   14.08
  -7  11   9    5.17    4.97
  -5  11   9   23.86    6.15
  -3  11   9   40.20    7.20
  -1  11   9   65.01    8.49
   1  11   9  115.60    8.97
   3  11   9   39.55    8.66
   5  11   9   97.43    9.44
   7  11   9    6.99    5.68
   9  11   9    3.99    5.63
  11  11   9    7.37    6.44
  13  11   9   -0.68    6.16
 -22  12   9  124.74   16.58
 -20  12   9  100.49   19.78
 -18  12   9  167.83   23.74
 -16  12   9    2.58    5.17
 -14  12   9   25.16    7.58
 -12  12   9  180.56   15.37
 -10  12   9  334.00   18.06
  -8  12   9  165.84   14.74
  -6  12   9   47.47    8.35
  -4  12   9    5.13    4.92
  -2  12   9  121.75   11.60
   0  12   9  289.97   14.52
   2  12   9  278.09   18.00
   4  12   9  167.50   16.50
   6  12   9   78.69    9.63
   8  12   9    1.11    5.33
  10  12   9   -4.18    6.02
  12  12   9   20.67    8.15
 -19  13   9   66.09   16.45
 -17  13   9   16.25    6.94
 -15  13   9   -2.37    5.68
 -13  13   9   20.14    7.21
 -11  13   9   79.70   11.32
  -9  13   9   45.70    8.99
  -7  13   9   12.64    6.30
  -5  13   9    2.27    5.20
  -3  13   9   34.35    7.35
  -1  13   9   72.08    8.61
   1  13   9  168.24   23.67
   3  13   9   89.89   12.77
   5  13   9   86.26   19.69
   7  13   9    4.61    5.70
   9  13   9   -6.18    5.95
 -16  14   9   -4.08    6.37
 -14  14   9   14.12    7.48
 -12  14   9   13.10    7.03
 -10  14   9   34.32    8.69
  -8  14   9   15.58    6.72
  -6  14   9   20.25    7.15
  -4  14   9    9.41    6.03
  -2  14   9    0.54    4.49
   0  14   9   10.46    9.93
   2  14   9    2.22   10.38
   4  14   9   14.47   12.97
   6  14   9   -2.05   10.88
 -11  15   9  106.78   13.97
  -9  15   9  274.39   19.40
  -7  15   9   38.37    8.53
  -5  15   9   13.51    6.92
  -3  15   9   -4.23    9.69
  -1  15   9   14.21   11.10
   1  15   9   18.23   13.63
 -30   0  10  206.12   21.37
 -28   0  10  350.96   18.20
 -26   0  10  517.99   21.04
 -24   0  10  553.84   21.62
 -22   0  10  420.78   16.68
 -20   0  10    8.51    3.85
 -18   0  10  110.63    9.21
 -16   0  10  343.71   13.34
 -14   0  10  242.65   13.30
 -12   0  10  132.52   11.53
 -10   0  10   84.08    5.19
  -8   0  10  497.16   14.21
  -6   0  10 2939.47   59.13
  -4   0  10 3490.14   52.29
  -2   0  10 1745.01   32.37
   0   0  10 1098.67   22.59
   2   0  10  281.81    9.17
   4   0  10   24.82    3.50
   6   0  10  145.81    7.25
   8   0  10  362.68   11.12
  10   0  10  331.85   12.86
  12   0  10   40.89    5.41
  14   0  10    4.29    4.81
  16   0  10   53.19   14.38
  18   0  10   58.36   17.08
  20   0  10   82.10   19.57
 -31   1  10   66.27    9.85
 -29   1  10  126.16    9.33
 -27   1  10  233.22   11.85
 -25   1  10  252.82   11.88
 -23   1  10  467.24   12.78
 -21   1  10   15.54    3.17
 -19   1  10   34.16    4.04
 -17   1  10   71.00    5.22
 -15   1  10    5.60    2.30
 -13   1  10   20.45    3.52
 -11   1  10    5.78    1.83
  -9   1  10   39.78    3.17
  -7   1  10  690.90   12.75
  -5   1  10  963.70   14.98
  -3   1  10 2229.59   26.29
  -1   1  10  737.21   11.70
   1   1  10  938.93   15.24
   3   1  10   95.59    4.46
   5   1  10   -0.59    1.27
   7   1  10  145.25    5.16
   9   1  10   59.29    4.55
  11   1  10    5.33    2.08
  13   1  10   20.56    3.72
  15   1  10   45.19    8.11
  17   1  10   17.83    6.37
  19   1  10   52.56   11.73
  21   1  10   59.11   13.23
 -30   2  10   11.77    5.94
 -28   2  10   -0.63    3.31
 -26   2  10    1.01    3.12
 -24   2  10   -1.98    3.15
 -22   2  10   44.14    4.94
 -20   2  10   28.98    3.96
 -18   2  10  330.86    9.72
 -16   2  10  259.68    8.10
 -14   2  10  399.17   12.53
 -12   2  10  267.50    8.04
 -10   2  10  220.83    7.14
  -8   2  10  112.29    4.42
  -6   2  10    2.59    1.06
  -4   2  10  105.82    4.24
  -2   2  10  119.84    3.73
   0   2  10   87.11    3.91
   2   2  10   63.93    3.62
   4   2  10   78.66    4.12
   6   2  10  118.33    4.85
   8   2  10  127.95    5.60
  10   2  10   82.73    5.02
  12   2  10   60.06    5.64
  14   2  10   16.34    4.07
  16   2  10   10.83    5.15
  18   2  10   -1.25    4.68
  20   2  10   -3.28    6.34
 -31   3  10   -0.68    5.15
 -29   3  10   47.73    7.06
 -27   3  10   55.02    6.25
 -25   3  10  168.73    9.57
 -23   3  10    9.60    3.04
 -21   3  10    0.76    2.41
 -19   3  10  134.54    7.46
 -17   3  10 1041.28   19.72
 -15   3  10 1152.19   22.92
 -13   3  10 1445.90   26.27
 -11   3  10  699.23   15.10
  -9   3  10   40.87    3.83
  -7   3  10   53.13    2.84
  -5   3  10  458.44    8.99
  -3   3  10  818.35   13.77
  -1   3  10  338.20    6.47
   1   3  10   64.05    3.86
   3   3  10   78.88    4.15
   5   3  10  387.81    8.78
   7   3  10  784.71   14.11
   9   3  10  416.26   10.31
  11   3  10  197.26    8.69
  13   3  10   91.58    7.89
  15   3  10   -2.59    3.07
  17   3  10   25.50    6.63
  19   3  10    3.81    4.70
 -30   4  10   12.30    5.34
 -28   4  10  135.73    9.41
 -26   4  10  114.50    8.15
 -24   4  10   96.64    7.08
 -22   4  10    8.13    3.10
 -20   4  10   28.34    3.92
 -18   4  10  479.28   12.08
 -16   4  10  830.81   18.55
 -14   4  10  885.60   18.55
 -12   4  10  375.68   10.43
 -10   4  10  272.40    8.51
  -8   4  10   44.23    3.03
  -6   4  10  131.31    4.56
  -4   4  10  506.00    9.91
  -2   4  10  855.97   14.52
   0   4  10  199.39    5.33
   2   4  10   41.35    3.08
   4   4  10   82.83    4.64
   6   4  10  450.36    9.79
   8   4  10  591.03   12.82
  10   4  10  338.18   11.04
  12   4  10   77.43    7.62
  14   4  10   11.06    4.32
  16   4  10   10.30    4.20
  18   4  10   45.78    8.80
  20   4  10   44.60    9.42
 -29   5  10    4.69    4.55
 -27   5  10   14.15    4.45
 -25   5  10    0.73    3.15
 -23   5  10    2.89    3.01
 -21   5  10    7.08    2.93
 -19   5  10   20.23    3.99
 -17   5  10  118.86    7.67
 -15   5  10    1.21    2.02
 -13   5  10    1.34    1.79
 -11   5  10  172.74    6.50
  -9   5  10   11.16    2.10
  -7   5  10   29.63    3.49
  -5   5  10   11.80    1.92
  -3   5  10  119.67    5.13
  -1   5  10    3.89    1.29
   1   5  10    6.83    1.82
   3   5  10  176.99    5.67
   5   5  10  116.62    5.40
   7   5  10  149.38    5.80
   9   5  10   15.26    3.35
  11   5  10    0.91    2.94
  13   5  10   -1.69    3.41
  15   5  10   -0.26    3.78
  17   5  10   13.62    6.27
  19   5  10    0.18    5.50
 -28   6  10   42.74    7.53
 -26   6  10   53.24    6.22
 -24   6  10   66.79    5.83
 -22   6  10   -2.91    2.91
 -20   6  10   36.58    6.84
 -18   6  10  333.98   11.27
 -16   6  10  148.26    8.51
 -14   6  10  345.79   10.60
 -12   6  10  351.98    8.93
 -10   6  10   91.54    5.40
  -8   6  10   16.70    2.78
  -6   6  10  182.35    6.67
  -4   6  10  221.94    6.82
  -2   6  10  278.67    8.55
   0   6  10  113.36    4.72
   2   6  10  145.31    5.91
   4   6  10  142.66    5.79
   6   6  10   57.57    4.08
   8   6  10  401.29   11.99
  10   6  10  136.74    8.73
  12   6  10   34.15    5.61
  14   6  10    4.50    4.19
  16   6  10    8.70    4.79
  18   6  10   30.14    8.64
 -27   7  10  133.99   16.77
 -25   7  10   70.75    8.75
 -23   7  10   37.72    5.28
 -21   7  10    2.54    3.59
 -19   7  10  441.88   15.11
 -17   7  10  611.43   17.63
 -15   7  10 1023.78   24.02
 -13   7  10  142.99    6.66
 -11   7  10 1013.47   20.14
  -9   7  10   -2.18    1.92
  -7   7  10    9.96    2.60
  -5   7  10  306.49    9.19
  -3   7  10  466.42   10.72
  -1   7  10  329.24    8.81
   1   7  10  115.93    5.16
   3   7  10   -0.15    1.59
   5   7  10   31.43    3.28
   7   7  10  960.60   20.68
   9   7  10  516.97   14.72
  11   7  10  237.06   11.93
  13   7  10   20.90    5.20
  15   7  10    5.77    4.49
  17   7  10   68.66    8.22
 -26   8  10   19.27    7.16
 -24   8  10   11.19    5.23
 -22   8  10    3.85    4.39
 -20   8  10   45.96    7.69
 -18   8  10  244.69   13.73
 -16   8  10  350.65   15.17
 -14   8  10  259.31    9.85
 -12   8  10   96.10    7.90
 -10   8  10  251.82    9.30
  -8   8  10    0.49    2.25
  -6   8  10   11.59    3.02
  -4   8  10   56.63    5.22
  -2   8  10   42.83    4.14
   0   8  10    2.19    2.14
   2   8  10    3.36    2.01
   4   8  10   46.01    3.83
   6   8  10  131.23    7.14
   8   8  10  328.69   11.43
  10   8  10   75.51    7.55
  12   8  10   55.76    7.03
  14   8  10   -0.21    4.46
  16   8  10   16.68    6.36
 -25   9  10   40.46    7.51
 -23   9  10   53.76    7.82
 -21   9  10   18.04    5.42
 -19   9  10    2.45    4.50
 -17   9  10    6.26    4.39
 -15   9  10    0.14    2.96
 -13   9  10    4.39    3.33
 -11   9  10    2.51    3.25
  -9   9  10   27.30    5.02
  -7   9  10  120.09    9.07
  -5   9  10  226.85   10.71
  -3   9  10  214.10   10.31
  -1   9  10  267.37    9.29
   1   9  10   45.84    4.47
   3   9  10   75.55    5.36
   5   9  10   -1.05    2.53
   7   9  10   -0.14    2.98
   9   9  10   -1.47    3.95
  11   9  10    5.78    4.91
  13   9  10   -5.36    4.56
  15   9  10   -4.69    5.27
 -24  10  10  188.51   13.60
 -22  10  10   80.13    9.17
 -20  10  10   -3.17    4.12
 -18  10  10    5.83    4.83
 -16  10  10   97.99    8.48
 -14  10  10  102.91    8.89
 -12  10  10   75.12    8.00
 -10  10  10    5.77    3.64
  -8  10  10   80.46    8.91
  -6  10  10  456.27   19.87
  -4  10  10  902.74   30.48
  -2  10  10  482.41   20.02
   0  10  10  530.91   17.56
   2  10  10  133.08    9.55
   4  10  10    4.71    3.69
   6  10  10   68.76    7.73
   8  10  10   64.90    8.66
  10  10  10    3.97    4.46
  12  10  10    3.34    5.46
  14  10  10   -3.89    5.48
 -23  11  10  156.77   14.79
 -21  11  10   18.11    6.05
 -19  11  10    2.35    4.02
 -17  11  10   19.12    5.74
 -15  11  10   70.84    9.37
 -13  11  10   49.19    8.83
 -11  11  10    0.32    4.59
  -9  11  10    6.40    5.04
  -7  11  10  216.02   14.79
  -5  11  10  475.14   20.86
  -3  11  10  471.55   20.55
  -1  11  10  235.76   13.88
   1  11  10  191.51   12.55
   3  11  10   -5.23    4.98
   5  11  10   29.30    5.60
   7  11  10   24.88    7.38
   9  11  10   32.28    8.13
  11  11  10   14.27    7.31
  13  11  10   10.95    7.42
 -20  12  10   24.80    9.98
 -18  12  10   15.04   11.91
 -16  12  10    3.31    5.49
 -14  12  10   11.19    6.43
 -12  12  10   12.09    6.24
 -10  12  10    2.79    5.40
  -8  12  10   13.66    6.19
  -6  12  10   25.55    6.67
  -4  12  10   81.52   10.07
  -2  12  10   26.19    6.74
   0  12  10    1.75    4.27
   2  12  10    4.29    6.50
   4  12  10    1.75    6.05
   6  12  10    3.51    5.14
   8  12  10    1.97    5.68
  10  12  10   -1.95    6.35
 -19  13  10  100.45   20.29
 -17  13  10   54.80    9.45
 -15  13  10  138.27   14.21
 -13  13  10  105.80   13.16
 -11  13  10  104.37   11.90
  -9  13  10    3.76    5.48
  -7  13  10   -0.37    5.18
  -5  13  10   37.72    7.97
  -3  13  10   21.14    6.60
  -1  13  10   48.99    7.59
   1  13  10   -0.16    9.07
   3  13  10   -1.45    7.01
   5  13  10   20.78   13.68
   7  13  10   83.93   10.17
   9  13  10   50.17    9.64
 -16  14  10  105.89   12.78
 -14  14  10  113.88   13.85
 -12  14  10  150.45   15.56
 -10  14  10    6.15    6.51
  -8  14  10    3.24    5.72
  -6  14  10   76.71   11.06
  -4  14  10   95.11   11.36
  -2  14  10  105.26   10.78
   0  14  10   19.45   10.87
   2  14  10    2.71    9.64
   4  14  10   31.41   15.23
 -11  15  10   -7.76    9.85
  -9  15  10    9.90    7.00
  -7  15  10    2.03    6.24
  -5  15  10   15.27    6.84
  -3  15  10    6.87   10.67
  -1  15  10    3.98   10.05
   1  15  10    7.47   11.52
 -30   0  11   -7.90    6.45
 -28   0  11    1.69    5.76
 -26   0  11   -1.71    5.72
 -24   0  11   -3.57    3.73
 -22   0  11   -3.32    3.31
 -20   0  11    1.03    3.36
 -18   0  11   -2.61    2.45
 -16   0  11   -3.25    3.07
 -14   0  11   -2.28    2.50
 -12   0  11    0.89    2.99
 -10   0  11   -0.26    1.63
  -8   0  11    1.48    1.90
  -6   0  11    2.23    2.02
  -4   0  11   -0.82    1.11
  -2   0  11    1.11    1.69
   0   0  11    1.49    1.88
   2   0  11    2.01    2.02
   4   0  11    2.63    2.22
   6   0  11    0.69    2.20
   8   0  11   -0.34    2.46
  10   0  11    2.78    3.11
  12   0  11    2.37    2.99
  14   0  11   -1.38    4.66
  16   0  11    1.45    5.56
  18   0  11    5.92    9.31
  20   0  11    0.19   10.61
 -31   1  11   36.86    7.69
 -29   1  11   43.18    6.44
 -27   1  11   -1.54    3.43
 -25   1  11   -0.03    4.06
 -23   1  11  182.10    9.39
 -21   1  11  379.10   11.19
 -19   1  11  675.37   15.25
 -17   1  11  562.65   14.56
 -15   1  11  181.32    8.86
 -13   1  11    3.64    2.33
 -11   1  11  638.70   14.17
  -9   1  11  271.07    7.09
  -7   1  11  665.59   12.89
  -5   1  11   51.38    2.93
  -3   1  11    1.07    1.02
  -1   1  11  239.73    5.88
   1   1  11  391.56    8.66
   3   1  11  692.13   12.01
   5   1  11  633.69   11.48
   7   1  11  166.12    5.64
   9   1  11   50.88    4.45
  11   1  11   -1.39    2.09
  13   1  11   19.94    3.88
  15   1  11   62.18    7.67
  17   1  11   20.26    6.62
  19   1  11   11.28    7.89
 -30   2  11   45.46    8.00
 -28   2  11   25.75    5.04
 -26   2  11   -2.74    3.46
 -24   2  11  166.51    9.25
 -22   2  11  342.27   10.85
 -20   2  11 1399.50   25.47
 -18   2  11 1118.82   23.33
 -16   2  11  749.42   19.56
 -14   2  11   56.97    5.78
 -12   2  11   13.00    2.55
 -10   2  11  776.10   16.41
  -8   2  11  891.24   15.91
  -6   2  11  202.65    4.93
  -4   2  11   13.85    2.07
  -2   2  11  294.04    5.95
   0   2  11 1559.90   21.58
   2   2  11  725.15   12.33
   4   2  11 1077.66   16.66
   6   2  11  606.95   11.26
   8   2  11  245.65    7.97
  10   2  11   24.54    3.39
  12   2  11   -0.05    2.56
  14   2  11   31.30    4.47
  16   2  11   21.94    6.66
  18   2  11    3.16    5.65
  20   2  11   -2.22    7.00
 -31   3  11    1.72    5.41
 -29   3  11    2.02    4.12
 -27   3  11    3.80    3.75
 -25   3  11    6.80    3.80
 -23   3  11   79.18    6.45
 -21   3  11  235.35    9.50
 -19   3  11  547.08   14.91
 -17   3  11  580.25   14.98
 -15   3  11  226.37    9.75
 -13   3  11  197.14    7.41
 -11   3  11    1.02    1.81
  -9   3  11    5.25    1.93
  -7   3  11    9.69    1.54
  -5   3  11   55.33    3.66
  -3   3  11  361.61    8.20
  -1   3  11  608.96   10.62
   1   3  11  417.36    9.09
   3   3  11  338.12    7.72
   5   3  11  387.03    9.10
   7   3  11  189.76    6.58
   9   3  11  142.69    6.82
  11   3  11   59.40    6.40
  13   3  11    2.39    3.14
  15   3  11   22.26    5.08
  17   3  11    4.96    5.41
  19   3  11    3.47    6.07
 -30   4  11  112.23   11.25
 -28   4  11   98.46    8.63
 -26   4  11   28.65    5.06
 -24   4  11   -3.69    2.86
 -22   4  11    6.27    2.92
 -20   4  11   10.90    3.54
 -18   4  11   25.60    4.20
 -16   4  11   13.69    3.87
 -14   4  11  270.66    9.73
 -12   4  11  462.46   12.14
 -10   4  11  726.90   16.10
  -8   4  11 1120.74   19.43
  -6   4  11  539.20   10.51
  -4   4  11 1156.81   18.43
  -2   4  11  297.92    6.59
   0   4  11   72.60    4.01
   2   4  11    8.71    1.93
   4   4  11   30.44    3.16
   6   4  11    0.16    1.73
   8   4  11   39.86    3.98
  10   4  11  125.07    8.22
  12   4  11  192.17   10.16
  14   4  11  310.01   12.99
  16   4  11  152.02   10.11
  18   4  11   31.68    8.15
 -29   5  11  236.84   14.05
 -27   5  11   90.56    7.75
 -25   5  11   15.90    4.24
 -23   5  11   21.46    4.20
 -21   5  11   71.64    6.86
 -19   5  11  140.29    8.83
 -17   5  11    2.78    2.99
 -15   5  11   14.57    3.64
 -13   5  11  636.22   15.26
 -11   5  11 1252.46   24.24
  -9   5  11 1997.19   31.16
  -7   5  11 2213.14   34.05
  -5   5  11 2099.93   29.96
  -3   5  11  639.08   12.33
  -1   5  11    1.91    1.47
   1   5  11    8.14    2.05
   3   5  11  575.49   11.58
   5   5  11   -0.89    1.70
   7   5  11   10.95    2.65
   9   5  11   62.69    5.94
  11   5  11  265.12   10.47
  13   5  11  445.15   15.78
  15   5  11  345.24   14.27
  17   5  11  136.59   14.22
 -28   6  11  132.41   11.84
 -26   6  11   18.45    4.72
 -24   6  11   16.63    4.67
 -22   6  11   -1.49    3.68
 -20   6  11   89.17    8.40
 -18   6  11   55.20    6.40
 -16   6  11  188.29   10.58
 -14   6  11  220.25    8.78
 -12   6  11  491.60   11.20
 -10   6  11 1264.71   21.94
  -8   6  11 1428.99   24.20
  -6   6  11 1121.02   20.16
  -4   6  11  574.09   13.58
  -2   6  11  130.28    6.29
   0   6  11   33.91    3.07
   2   6  11    2.13    1.69
   4   6  11  200.82    6.72
   6   6  11   87.61    5.14
   8   6  11   98.97    7.27
  10   6  11  112.88    8.02
  12   6  11  287.14   13.08
  14   6  11  221.19   12.33
  16   6  11  121.49   10.26
  18   6  11   97.31   12.61
 -27   7  11   30.51   10.33
 -25   7  11   13.26    5.32
 -23   7  11   44.31    6.05
 -21   7  11   81.06    8.24
 -19   7  11   82.74    9.01
 -17   7  11  351.37   15.56
 -15   7  11   59.92    6.21
 -13   7  11   17.32    3.04
 -11   7  11    4.34    2.41
  -9   7  11  186.54    7.86
  -7   7  11   42.63    4.37
  -5   7  11  213.47    7.98
  -3   7  11  220.78    7.48
  -1   7  11  145.29    6.80
   1   7  11  305.66    8.36
   3   7  11    7.25    2.21
   5   7  11  162.20    6.50
   7   7  11   45.64    5.29
   9   7  11  282.01   10.78
  11   7  11   49.34    6.70
  13   7  11   16.09    5.32
  15   7  11   64.57    7.92
  17   7  11   -1.34    4.91
 -26   8  11   -1.16    6.53
 -24   8  11   60.52    8.34
 -22   8  11  335.72   17.06
 -20   8  11  181.02   17.56
 -18   8  11  806.23   32.77
 -16   8  11  359.27   15.69
 -14   8  11   69.18    6.09
 -12   8  11   12.88    3.51
 -10   8  11  196.65    7.92
  -8   8  11  151.74    7.72
  -6   8  11  180.65    7.74
  -4   8  11    7.15    2.76
  -2   8  11   77.17    5.50
   0   8  11  422.67   10.87
   2   8  11  828.49   14.98
   4   8  11  168.49    7.06
   6   8  11  349.14   11.44
   8   8  11   87.39    7.30
  10   8  11   41.14    6.15
  12   8  11   -3.06    3.87
  14   8  11    0.18    5.14
  16   8  11    3.92    5.90
 -25   9  11    4.62    5.19
 -23   9  11   49.91    7.74
 -21   9  11  238.18   21.10
 -19   9  11  467.23   24.74
 -17   9  11  405.42   17.49
 -15   9  11   77.29    6.75
 -13   9  11    0.20    2.88
 -11   9  11  119.57    8.53
  -9   9  11  425.82   15.50
  -7   9  11  290.89   12.48
  -5   9  11   14.10    4.01
  -3   9  11    0.34    3.01
  -1   9  11  264.09    8.97
   1   9  11  426.02   12.06
   3   9  11  151.78    6.42
   5   9  11  288.99   10.33
   7   9  11  154.17   10.11
   9   9  11   28.52    6.19
  11   9  11   -4.19    4.35
  13   9  11   14.34    6.45
  15   9  11   31.36    7.46
 -24  10  11    5.32    5.38
 -22  10  11    2.56    5.34
 -20  10  11   74.75   12.41
 -18  10  11   10.76    5.71
 -16  10  11    6.52    4.96
 -14  10  11   -2.77    3.08
 -12  10  11    2.37    3.70
 -10  10  11   35.00    5.93
  -8  10  11   21.16    5.11
  -6  10  11   13.18    5.64
  -4  10  11    4.20    4.64
  -2  10  11   39.79    7.35
   0  10  11    4.19    4.12
   2  10  11    4.48    3.39
   4  10  11   18.94    4.17
   6  10  11    9.19    4.47
   8  10  11    0.69    4.65
  10  10  11   -1.89    4.68
  12  10  11    2.77    5.41
 -23  11  11    8.33    6.90
 -21  11  11   31.40    7.24
 -19  11  11   33.62    7.60
 -17  11  11   64.60    7.32
 -15  11  11   15.94    6.54
 -13  11  11    0.21    4.85
 -11  11  11   41.36    8.08
  -9  11  11   65.33    9.68
  -7  11  11   60.72    9.30
  -5  11  11   41.64    7.90
  -3  11  11    7.43    4.95
  -1  11  11   32.60    7.17
   1  11  11  145.73    9.97
   3  11  11   72.22    9.21
   5  11  11    8.33    4.38
   7  11  11   28.91    8.04
   9  11  11   19.12    7.31
  11  11  11    8.54    7.42
 -20  12  11  124.40   17.04
 -18  12  11  215.27   20.61
 -16  12  11  194.68   14.76
 -14  12  11   12.69    6.29
 -12  12  11   57.64    9.97
 -10  12  11   98.80   12.16
  -8  12  11  148.06   14.07
  -6  12  11   58.46    9.12
  -4  12  11   31.25    7.09
  -2  12  11   27.67    6.74
   0  12  11  132.57   11.89
   2  12  11  375.97   21.90
   4  12  11  121.79   14.85
   6  12  11  154.17   24.34
   8  12  11   26.14    7.88
 -17  13  11  109.58   12.28
 -15  13  11   44.18    8.94
 -13  13  11   18.81    7.65
 -11  13  11   25.71    7.98
  -9  13  11   15.38    6.82
  -7  13  11   32.71    7.87
  -5  13  11    2.60    5.27
  -3  13  11    4.66    5.80
  -1  13  11   59.36    8.89
   1  13  11   66.31   15.51
   3  13  11  111.05   14.41
   5  13  11  122.02   22.42
   7  13  11   30.97   16.06
 -14  14  11   50.96   10.56
 -12  14  11   16.83    7.40
 -10  14  11   33.98    8.80
  -8  14  11   19.81    7.34
  -6  14  11   71.56   10.90
  -4  14  11   60.54    9.89
  -2  14  11    7.98    5.76
   0  14  11   41.00   14.32
   2  14  11   -8.81    9.03
  -7  15  11  157.56   23.82
  -5  15  11   96.38   11.91
 -30   0  12    0.76    7.44
 -28   0  12   61.89    9.93
 -26   0  12  252.01   21.20
 -24   0  12  341.59   16.08
 -22   0  12  460.08   18.23
 -20   0  12   87.25    9.09
 -18   0  12   61.98    9.17
 -16   0  12  515.14   22.31
 -14   0  12 1014.70   34.03
 -12   0  12 1236.02   38.66
 -10   0  12  412.12   13.45
  -8   0  12  300.57   11.22
  -6   0  12   70.59    6.20
  -4   0  12  320.69    9.56
  -2   0  12  656.74   15.97
   0   0  12  663.29   16.48
   2   0  12  250.49   10.75
   4   0  12   -0.25    2.21
   6   0  12  199.78    8.98
   8   0  12  159.32   10.10
  10   0  12  735.32   22.30
  12   0  12  200.10   11.03
  14   0  12   61.99   11.10
  16   0  12    7.05    7.03
  18   0  12    8.68   10.88
 -31   1  12    0.10    5.36
 -29   1  12    6.94    4.78
 -27   1  12   63.63    8.24
 -25   1  12  125.84    8.39
 -23   1  12  227.00   10.29
 -21   1  12   83.73    6.48
 -19   1  12    4.08    3.28
 -17   1  12   77.03    7.14
 -15   1  12  232.00   10.05
 -13   1  12  856.92   21.30
 -11   1  12  132.55    6.52
  -9   1  12  208.03    6.41
  -7   1  12   -0.20    1.33
  -5   1  12  151.33    5.16
  -3   1  12  204.14    5.36
  -1   1  12  171.38    5.15
   1   1  12   89.89    4.62
   3   1  12    0.14    1.55
   5   1  12   40.32    3.42
   7   1  12  186.88    6.85
   9   1  12   90.33    6.10
  11   1  12  199.60    7.99
  13   1  12  104.28    7.55
  15   1  12   11.66    4.74
  17   1  12   -0.58    4.84
  19   1  12   -0.22    7.16
 -30   2  12   -0.43    5.07
 -28   2  12    5.65    4.02
 -26   2  12   15.21    5.06
 -24   2  12   29.53    4.58
 -22   2  12   -1.21    2.55
 -20   2  12    1.76    2.91
 -18   2  12   -0.70    2.75
 -16   2  12   12.48    3.65
 -14   2  12   -1.64    2.06
 -12   2  12    5.29    2.23
 -10   2  12   89.63    5.87
  -8   2  12   79.57    4.71
  -6   2  12  108.77    4.61
  -4   2  12   56.60    3.82
  -2   2  12  150.89    5.06
   0   2  12  250.95    6.45
   2   2  12   60.37    3.90
   4   2  12    0.20    1.60
   6   2  12    2.82    1.89
   8   2  12   22.80    3.47
  10   2  12    2.54    2.47
  12   2  12    6.82    3.27
  14   2  12   13.17    3.89
  16   2  12   -1.22    5.16
  18   2  12    8.27    6.24
 -31   3  12    3.17    8.31
 -29   3  12   37.73    6.47
 -27   3  12   66.02    7.36
 -25   3  12  486.07   15.50
 -23   3  12  317.02   10.80
 -21   3  12   27.98    4.75
 -19   3  12    0.93    3.11
 -17   3  12   58.62    6.39
 -15   3  12  483.70   15.26
 -13   3  12  593.41   16.93
 -11   3  12  590.68   14.25
  -9   3  12  249.45    8.49
  -7   3  12    8.55    1.76
  -5   3  12  371.80    8.48
  -3   3  12  431.14    9.50
  -1   3  12  409.48    8.48
   1   3  12 1617.45   24.39
   3   3  12   41.12    3.43
   5   3  12   11.04    2.24
   7   3  12  224.86    8.18
   9   3  12  175.45    7.53
  11   3  12   83.42    7.10
  13   3  12   11.08    4.03
  15   3  12    4.10    4.08
  17   3  12   14.33    6.94
 -30   4  12    0.63    4.76
 -28   4  12   61.88    7.36
 -26   4  12  216.24   12.13
 -24   4  12  296.10   10.99
 -22   4  12  215.31   10.99
 -20   4  12    1.47    3.02
 -18   4  12   26.87    4.86
 -16   4  12   87.30    7.57
 -14   4  12  320.70   12.12
 -12   4  12  593.77   14.65
 -10   4  12  250.78    8.73
  -8   4  12   89.54    5.22
  -6   4  12  179.98    5.99
  -4   4  12   92.02    5.00
  -2   4  12  605.40   12.13
   0   4  12  678.25   12.02
   2   4  12  372.55    8.43
   4   4  12  134.47    6.37
   6   4  12  250.26    7.67
   8   4  12  125.60    6.63
  10   4  12  142.27    9.02
  12   4  12   95.69    7.78
  14   4  12   12.75    4.75
  16   4  12    3.02    4.28
  18   4  12   35.55    8.82
 -29   5  12    5.63    5.00
 -27   5  12    6.69    4.19
 -25   5  12   16.14    5.39
 -23   5  12   36.71    5.36
 -21   5  12   -0.70    2.98
 -19   5  12   16.78    4.39
 -17   5  12  139.40    9.90
 -15   5  12   30.27    5.20
 -13   5  12   95.80    6.73
 -11   5  12    2.20    1.80
  -9   5  12    0.97    1.88
  -7   5  12    3.88    2.20
  -5   5  12   13.76    2.72
  -3   5  12    6.68    2.19
  -1   5  12   25.20    2.60
   1   5  12   14.47    2.45
   3   5  12    6.80    2.12
   5   5  12    1.27    1.95
   7   5  12    0.01    2.21
   9   5  12   12.19    3.80
  11   5  12   11.99    4.20
  13   5  12    5.57    4.40
  15   5  12    5.02    4.69
  17   5  12    9.74    7.07
 -28   6  12   20.75    6.55
 -26   6  12   60.74    7.20
 -24   6  12   72.87    8.20
 -22   6  12   70.71    7.16
 -20   6  12   31.22    5.55
 -18   6  12   64.15    8.60
 -16   6  12  205.76   14.42
 -14   6  12  169.12    8.78
 -12   6  12  480.83   11.25
 -10   6  12  166.75    7.30
  -8   6  12   -0.05    1.76
  -6   6  12    3.14    1.89
  -4   6  12  271.89    8.52
  -2   6  12  436.16   10.92
   0   6  12  118.43    5.35
   2   6  12  125.67    6.24
   4   6  12   30.47    3.48
   6   6  12    7.66    2.63
   8   6  12   83.39    7.07
  10   6  12   29.99    5.04
  12   6  12   46.50    6.84
  14   6  12   18.69    5.55
  16   6  12    4.19    5.03
 -27   7  12   79.63   14.06
 -25   7  12  156.07   14.25
 -23   7  12  176.44   12.36
 -21   7  12  125.03   11.57
 -19   7  12    6.68    4.45
 -17   7  12  197.51   13.62
 -15   7  12  312.06   12.00
 -13   7  12  484.64   13.68
 -11   7  12  278.94    9.28
  -9   7  12  210.48    8.26
  -7   7  12    7.65    2.68
  -5   7  12  142.60    7.91
  -3   7  12  452.64   12.52
  -1   7  12  621.76   15.21
   1   7  12  314.24    8.22
   3   7  12   69.04    4.76
   5   7  12    4.47    2.41
   7   7  12   95.96    7.51
   9   7  12   93.25    7.58
  11   7  12  115.04    9.83
  13   7  12   14.15    5.30
  15   7  12    5.96    5.19
 -26   8  12   23.33    7.75
 -24   8  12   64.86    9.81
 -22   8  12   13.33    7.33
 -20   8  12    0.89    6.07
 -18   8  12   -0.78    5.16
 -16   8  12   43.67    7.03
 -14   8  12  181.55   11.85
 -12   8  12  116.48    7.36
 -10   8  12   33.95    4.27
  -8   8  12  101.48    6.95
  -6   8  12  172.43    8.21
  -4   8  12   43.32    4.74
  -2   8  12  205.35    8.57
   0   8  12  160.54    7.89
   2   8  12  151.75    6.88
   4   8  12    1.63    2.28
   6   8  12    5.61    3.34
   8   8  12    2.19    3.41
  10   8  12   49.54    6.92
  12   8  12   -5.52    4.16
  14   8  12    3.99    5.92
 -25   9  12    7.82    6.18
 -23   9  12   27.15    9.39
 -21   9  12    9.83    7.39
 -19   9  12    0.46    5.77
 -17   9  12   39.20    7.40
 -15   9  12   28.68    4.46
 -13   9  12    8.07    3.49
 -11   9  12   48.79    6.06
  -9   9  12   -0.29    2.98
  -7   9  12    7.60    3.63
  -5   9  12    0.43    2.95
  -3   9  12    7.86    3.56
  -1   9  12   53.57    5.44
   1   9  12    6.64    3.00
   3   9  12   42.49    4.27
   5   9  12    0.48    3.19
   7   9  12    8.36    4.38
   9   9  12   54.15    8.12
  11   9  12   36.84    7.69
  13   9  12   50.80    8.81
 -24  10  12  194.85   16.65
 -22  10  12   66.93   12.69
 -20  10  12   12.53    7.49
 -18  10  12   26.58    6.87
 -16  10  12  163.52   13.43
 -14  10  12  258.71   12.03
 -12  10  12  374.11   13.78
 -10  10  12   56.46    6.35
  -8  10  12   21.61    4.70
  -6  10  12   18.10    5.50
  -4  10  12  106.53    9.84
  -2  10  12   76.41    8.45
   0  10  12  131.67   10.72
   2  10  12   87.00    7.65
   4  10  12   24.10    4.66
   6  10  12   51.00    7.25
   8  10  12   97.16   12.05
  10  10  12  189.10   14.18
  12  10  12   93.24   10.91
 -21  11  12   48.60   11.47
 -19  11  12   -0.33    5.28
 -17  11  12   35.45   10.13
 -15  11  12   93.71    9.57
 -13  11  12  174.87   13.21
 -11  11  12  125.02   11.19
  -9  11  12   64.70    9.78
  -7  11  12    2.66    4.87
  -5  11  12   29.22    7.42
  -3  11  12   72.62    8.53
  -1  11  12  123.77   10.65
   1  11  12   35.17    5.70
   3  11  12   15.04    6.37
   5  11  12   12.81    4.88
   7  11  12   67.91   10.04
   9  11  12  112.61   13.23
 -20  12  12    9.97   10.73
 -18  12  12   -0.05    7.44
 -16  12  12   -0.93    4.37
 -14  12  12    1.93    5.18
 -12  12  12   -0.89    5.32
 -10  12  12   -0.13    5.20
  -8  12  12    0.98    5.44
  -6  12  12    3.30    5.64
  -4  12  12    1.13    5.18
  -2  12  12   -0.83    4.79
   0  12  12    4.66    4.61
   2  12  12    5.90    5.63
   4  12  12   12.02    7.52
   6  12  12    1.33   12.15
   8  12  12    1.10    6.51
 -17  13  12   13.72    7.24
 -15  13  12   71.43    9.59
 -13  13  12    8.46    7.14
 -11  13  12  107.24   13.65
  -9  13  12   25.67    8.13
  -7  13  12    5.65    6.30
  -5  13  12   29.48    8.07
  -3  13  12   75.59   10.40
  -1  13  12  110.07   11.64
   1  13  12   49.85   10.87
   3  13  12   23.05    9.14
   5  13  12   16.18   13.52
 -12  14  12   85.15   12.47
 -10  14  12   59.27   11.06
  -8  14  12    8.22    7.16
  -6  14  12    5.45    6.67
  -4  14  12   69.32   10.52
  -2  14  12  102.85   11.25
   0  14  12   97.75   20.24
 -30   0  13    0.93    7.22
 -28   0  13   -2.84    6.27
 -26   0  13   -3.94    4.39
 -24   0  13    0.93    4.46
 -22   0  13   -1.14    4.79
 -20   0  13    0.07    4.27
 -18   0  13    2.04    3.98
 -16   0  13   -1.15    3.79
 -14   0  13   -1.83    3.42
 -12   0  13    1.40    3.27
 -10   0  13   -1.56    2.95
  -8   0  13   -1.43    2.02
  -6   0  13    1.07    2.28
  -4   0  13    7.92    2.34
  -2   0  13    3.24    2.12
   0   0  13   -0.15    1.91
   2   0  13   -0.89    2.01
   4   0  13    3.64    2.68
   6   0  13    1.19    2.73
   8   0  13   -2.69    3.03
  10   0  13    0.74    3.54
  12   0  13   -4.90    3.05
  14   0  13   -2.45    6.00
  16   0  13    1.37    6.70
 -31   1  13   35.44    7.60
 -29   1  13   72.19    8.84
 -27   1  13   34.10    6.68
 -25   1  13   11.83    3.86
 -23   1  13   54.17    6.16
 -21   1  13  189.55   12.07
 -19   1  13  534.49   17.12
 -17   1  13  682.32   19.45
 -15   1  13  621.09   18.04
 -13   1  13  103.81    8.08
 -11   1  13   66.98    6.43
  -9   1  13  311.01    9.69
  -7   1  13  208.49    6.88
  -5   1  13  683.17   12.67
  -3   1  13   10.16    1.88
  -1   1  13   -2.82    1.28
   1   1  13  153.60    5.71
   3   1  13  256.83    7.10
   5   1  13  359.59    8.65
   7   1  13  201.25    8.06
   9   1  13   58.03    5.12
  11   1  13   38.41    4.45
  13   1  13   12.96    3.96
  15   1  13   22.42    5.92
  17   1  13    0.80    5.67
 -30   2  13   65.68    9.43
 -28   2  13  100.80   10.29
 -26   2  13    5.57    3.95
 -24   2  13   23.02    4.83
 -22   2  13  242.67   13.45
 -20   2  13  487.56   16.50
 -18   2  13  964.48   24.66
 -16   2  13 1330.40   30.44
 -14   2  13  274.07   11.23
 -12   2  13   84.13    7.22
 -10   2  13   87.63    6.09
  -8   2  13  194.26    7.72
  -6   2  13  430.85    9.36
  -4   2  13  269.34    7.28
  -2   2  13   42.64    3.27
   0   2  13  157.57    5.77
   2   2  13  734.62   13.15
   4   2  13  319.47    8.11
   6   2  13  357.47    9.43
   8   2  13  423.46   11.55
  10   2  13   67.98    5.52
  12   2  13    4.30    3.46
  14   2  13   21.94    4.77
  16   2  13   12.48    6.59
 -29   3  13    0.69    4.42
 -27   3  13    3.20    4.35
 -25   3  13    7.72    4.05
 -23   3  13  193.48   11.19
 -21   3  13   92.13    8.61
 -19   3  13  236.32   12.00
 -17   3  13  715.81   20.15
 -15   3  13  241.13   10.75
 -13   3  13  187.37   10.31
 -11   3  13   45.72    4.65
  -9   3  13   11.96    2.90
  -7   3  13    5.19    1.92
  -5   3  13   23.65    2.82
  -3   3  13   36.19    3.33
  -1   3  13   48.46    3.55
   1   3  13  995.34   17.24
   3   3  13  131.50    6.25
   5   3  13  264.96    7.46
   7   3  13  173.29    7.81
   9   3  13   83.55    6.11
  11   3  13    4.71    3.40
  13   3  13   -4.13    3.11
  15   3  13   -1.91    3.97
  17   3  13   -1.08    5.70
 -30   4  13   77.09    9.93
 -28   4  13  108.24   12.54
 -26   4  13  121.76   10.75
 -24   4  13   30.88    5.48
 -22   4  13  216.97   13.37
 -20   4  13   93.40    8.66
 -18   4  13    1.59    3.07
 -16   4  13   33.68    5.33
 -14   4  13   90.30    7.86
 -12   4  13  151.34    7.98
 -10   4  13  578.68   14.72
  -8   4  13  977.28   18.30
  -6   4  13  481.40   11.52
  -4   4  13  816.64   15.02
  -2   4  13   62.98    4.56
   0   4  13   80.48    4.54
   2   4  13    4.15    1.93
   4   4  13   86.98    5.51
   6   4  13    5.27    2.69
   8   4  13    4.00    2.75
  10   4  13   12.73    4.02
  12   4  13   11.22    4.19
  14   4  13   34.99    6.45
  16   4  13   39.77    8.96
 -29   5  13  196.78   14.43
 -27   5  13  252.44   17.81
 -25   5  13  131.90   11.12
 -23   5  13   17.25    5.07
 -21   5  13    3.10    3.87
 -19   5  13  113.36    9.36
 -17   5  13  322.36   13.10
 -15   5  13   30.92    5.22
 -13   5  13   -0.13    2.24
 -11   5  13  505.71   13.76
  -9   5  13 1294.67   22.79
  -7   5  13 1891.71   30.77
  -5   5  13 1394.22   24.42
  -3   5  13  950.82   17.05
  -1   5  13   20.81    3.08
   1   5  13    7.16    2.30
   3   5  13   19.55    3.01
   5   5  13    5.56    2.41
   7   5  13   17.50    3.44
   9   5  13   -2.93    3.07
  11   5  13   43.47    6.15
  13   5  13   18.36    5.61
  15   5  13  183.79   12.69
 -28   6  13  119.61   11.61
 -26   6  13  232.63   14.76
 -24   6  13   14.64    5.27
 -22   6  13   38.16    6.41
 -20   6  13   15.69    4.86
 -18   6  13   13.05    4.23
 -16   6  13   75.68    9.35
 -14   6  13    0.39    2.23
 -12   6  13  176.54    9.71
 -10   6  13  393.85   11.50
  -8   6  13 1051.00   19.97
  -6   6  13  831.63   17.04
  -4   6  13  515.15   12.64
  -2   6  13  335.80    9.77
   0   6  13    9.08    2.80
   2   6  13    9.58    2.42
   4   6  13   36.10    3.83
   6   6  13    4.19    2.58
   8   6  13   -1.70    2.99
  10   6  13   23.93    4.87
  12   6  13   48.39    7.18
  14   6  13   71.68    8.38
 -27   7  13    8.86    6.66
 -25   7  13   60.72   11.96
 -23   7  13   21.09    6.27
 -21   7  13  157.27   13.34
 -19   7  13   16.13    5.03
 -17   7  13  106.14    9.12
 -15   7  13   87.85    7.18
 -13   7  13    5.08    3.03
 -11   7  13  128.90    6.71
  -9   7  13   85.60    6.43
  -7   7  13   97.30    6.89
  -5   7  13   50.28    5.13
  -3   7  13   29.72    4.72
  -1   7  13    3.90    2.57
   1   7  13   24.47    3.21
   3   7  13   51.41    4.42
   5   7  13  151.21    7.56
   7   7  13   53.51    6.09
   9   7  13   42.84    5.90
  11   7  13   35.59    6.53
  13   7  13   -5.78    4.28
 -26   8  13    5.08    6.11
 -24   8  13    4.08    6.79
 -22   8  13  169.59   18.29
 -20   8  13   90.42   13.67
 -18   8  13  508.35   26.17
 -16   8  13  371.09   16.58
 -14   8  13  296.81   15.05
 -12   8  13   10.41    3.16
 -10   8  13    3.58    2.76
  -8   8  13  103.78    7.09
  -6   8  13  314.88   10.61
  -4   8  13   65.12    6.00
  -2   8  13   -1.89    2.63
   0   8  13    8.83    2.77
   2   8  13  399.43   10.54
   4   8  13  293.00    8.78
   6   8  13  171.87    9.96
   8   8  13  141.60    9.52
  10   8  13   33.60    6.61
  12   8  13   -3.10    4.36
 -25   9  13    7.27    6.18
 -23   9  13   17.60    8.59
 -21   9  13   96.76   13.95
 -19   9  13  201.02   19.32
 -17   9  13  458.30   19.51
 -15   9  13  165.38   13.57
 -13   9  13   78.05    7.09
 -11   9  13   28.83    4.92
  -9   9  13   20.85    4.63
  -7   9  13  265.98   11.45
  -5   9  13  217.60   11.05
  -3   9  13   97.21    8.14
  -1   9  13    0.99    2.95
   1   9  13  260.53    9.33
   3   9  13  145.66    6.42
   5   9  13  223.89   11.45
   7   9  13   91.68    8.53
   9   9  13   74.90    9.53
  11   9  13    3.94    5.63
 -24  10  13    8.35    6.86
 -22  10  13    7.22    7.53
 -20  10  13   -1.78    6.70
 -18  10  13   23.89    6.85
 -16  10  13   83.35   10.27
 -14  10  13    3.89    3.63
 -12  10  13   12.38    4.48
 -10  10  13   69.99    7.43
  -8  10  13   -0.46    3.34
  -6  10  13   26.92    6.07
  -4  10  13   15.30    5.38
  -2  10  13    1.94    4.08
   0  10  13    8.70    4.70
   2  10  13   35.21    5.60
   4  10  13    9.92    7.01
   6  10  13    3.08    4.98
   8  10  13    6.10    6.12
  10  10  13   -1.72    5.57
 -21  11  13   43.00   11.24
 -19  11  13   83.50   10.69
 -17  11  13   60.56   11.76
 -15  11  13   17.13    5.81
 -13  11  13   17.41    5.94
 -11  11  13   -2.61    4.78
  -9  11  13    4.93    4.83
  -7  11  13   43.05    7.65
  -5  11  13   41.35    7.08
  -3  11  13   27.07    6.53
  -1  11  13    2.01    4.47
   1  11  13    6.80    4.43
   3  11  13   18.26    8.45
   5  11  13   80.20   12.99
   7  11  13    3.09    5.98
 -18  12  13  258.26   25.07
 -16  12  13  120.57   11.24
 -14  12  13  174.44   13.76
 -12  12  13   -3.43    5.09
 -10  12  13    5.84    5.49
  -8  12  13   81.73    9.71
  -6  12  13  129.07   11.76
  -4  12  13   62.01    8.63
  -2  12  13   -2.58    4.37
   0  12  13   18.95    5.97
   2  12  13   34.51    7.90
   4  12  13   99.87   13.74
   6  12  13  146.73   19.52
 -15  13  13   72.02   10.91
 -13  13  13   27.36    7.65
 -11  13  13    5.94    5.79
  -9  13  13    9.14    6.09
  -7  13  13    1.08    5.34
  -5  13  13   11.24    6.00
  -3  13  13    3.01    4.78
  -1  13  13    2.51    4.96
   1  13  13   19.78    9.69
   3  13  13   51.24   11.23
 -10  14  13   14.88    8.36
  -8  14  13   21.47    8.23
  -6  14  13   53.99   10.17
  -4  14  13   47.06    8.36
 -30   0  14   36.45   11.23
 -28   0  14    9.42    8.03
 -26   0  14  202.36   19.46
 -24   0  14   94.93   13.18
 -22   0  14  173.49   17.37
 -20   0  14   12.29    5.47
 -18   0  14    5.26    4.75
 -16   0  14  645.43   26.86
 -14   0  14  623.97   25.83
 -12   0  14 1065.46   36.35
 -10   0  14 2054.90   58.67
  -8   0  14  460.69   15.85
  -6   0  14  602.02   18.94
  -4   0  14  240.25    8.77
  -2   0  14  183.62    8.28
   0   0  14  208.23    9.23
   2   0  14  127.17    8.44
   4   0  14    5.11    3.04
   6   0  14  125.42   10.72
   8   0  14  441.40   17.24
  10   0  14  512.30   18.91
  12   0  14  357.34   15.83
  14   0  14  220.47   20.87
  16   0  14   72.20   13.05
 -29   1  14   22.99   10.05
 -27   1  14   -2.28    4.80
 -25   1  14   27.76    6.03
 -23   1  14   13.79    4.71
 -21   1  14   -0.75    3.49
 -19   1  14   -1.70    2.82
 -17   1  14  231.64   13.34
 -15   1  14  128.26    9.55
 -13   1  14  653.19   18.69
 -11   1  14  643.36   18.39
  -9   1  14  790.20   17.90
  -7   1  14  390.17   10.25
  -5   1  14  295.54    7.73
  -3   1  14   36.69    3.14
  -1   1  14    2.53    1.71
   1   1  14   21.43    2.83
   3   1  14    0.42    1.90
   5   1  14   10.35    2.51
   7   1  14  207.55    8.55
   9   1  14  250.34    9.74
  11   1  14  210.12    9.33
  13   1  14  216.78   11.27
  15   1  14   59.60    8.51
 -30   2  14   13.56    6.19
 -28   2  14   24.35    9.30
 -26   2  14   36.26    6.71
 -24   2  14   58.37    7.86
 -22   2  14  132.88   10.62
 -20   2  14  173.68   11.83
 -18   2  14   65.06    7.05
 -16   2  14   69.57    7.20
 -14   2  14   -0.18    2.61
 -12   2  14   39.64    5.56
 -10   2  14    1.95    2.42
  -8   2  14   43.24    4.80
  -6   2  14  109.86    5.25
  -4   2  14  181.97    6.70
  -2   2  14  293.77    7.33
   0   2  14  202.77    6.48
   2   2  14  188.62    6.70
   4   2  14   64.19    4.54
   6   2  14  164.83    8.02
   8   2  14   25.32    4.07
  10   2  14   33.14    4.44
  12   2  14    9.99    3.98
  14   2  14    9.57    4.39
  16   2  14   14.36    6.52
 -29   3  14   13.34    8.69
 -27   3  14   39.48    7.07
 -25   3  14  249.76   15.21
 -23   3  14  615.97   20.31
 -21   3  14  523.04   18.05
 -19   3  14  119.03    9.66
 -17   3  14   37.54    5.81
 -15   3  14  104.32    8.83
 -13   3  14  140.47    9.72
 -11   3  14  283.82    9.90
  -9   3  14  145.96    7.91
  -7   3  14   13.97    2.72
  -5   3  14   84.12    5.02
  -3   3  14  858.46   15.90
  -1   3  14  200.81    6.42
   1   3  14 1041.63   18.21
   3   3  14  471.44   11.05
   5   3  14  111.99    6.42
   7   3  14   14.10    3.53
   9   3  14   24.06    4.06
  11   3  14   47.33    6.37
  13   3  14   10.54    4.61
  15   3  14    2.82    4.65
 -28   4  14    7.44    7.64
 -26   4  14  116.07   12.88
 -24   4  14  170.49   12.49
 -22   4  14  730.25   22.39
 -20   4  14  171.83   12.04
 -18   4  14  105.02    9.33
 -16   4  14   52.79    6.71
 -14   4  14  131.19    9.61
 -12   4  14  464.48   13.28
 -10   4  14  282.50   10.07
  -8   4  14  152.23    7.01
  -6   4  14    8.78    2.59
  -4   4  14  217.55    7.11
  -2   4  14  508.40   11.55
   0   4  14  245.93    7.00
   2   4  14  263.46    7.52
   4   4  14  199.83    7.69
   6   4  14   19.53    3.65
   8   4  14    1.26    2.91
  10   4  14   13.76    4.43
  12   4  14   47.29    6.48
  14   4  14   12.17    5.29
 -29   5  14   -3.15    4.67
 -27   5  14    0.68    5.75
 -25   5  14    2.41    4.50
 -23   5  14    6.53    4.53
 -21   5  14   25.17    5.67
 -19   5  14   73.66    8.22
 -17   5  14   21.76    4.96
 -15   5  14   -1.69    2.93
 -13   5  14   -1.15    2.30
 -11   5  14   22.67    4.03
  -9   5  14    5.12    2.39
  -7   5  14   -0.22    2.07
  -5   5  14    8.57    2.69
  -3   5  14   96.65    5.82
  -1   5  14    4.26    2.41
   1   5  14    2.72    2.17
   3   5  14    9.89    2.72
   5   5  14   12.00    3.18
   7   5  14   -1.29    2.51
   9   5  14    8.20    4.00
  11   5  14    1.80    3.99
  13   5  14    8.56    5.27
 -28   6  14    7.75    6.58
 -26   6  14   67.48   10.41
 -24   6  14  193.01   13.60
 -22   6  14  107.44   10.08
 -20   6  14   66.72    8.24
 -18   6  14    2.36    3.65
 -16   6  14   10.44    4.15
 -14   6  14   59.02    6.11
 -12   6  14  132.77    8.48
 -10   6  14  157.81    7.53
  -8   6  14   17.45    3.21
  -6   6  14   -0.76    2.24
  -4   6  14   14.30    3.19
  -2   6  14   84.96    6.04
   0   6  14  268.27    9.15
   2   6  14  223.74    7.50
   4   6  14  115.99    7.03
   6   6  14    2.28    2.93
   8   6  14    2.08    3.57
  10   6  14   21.33    5.19
  12   6  14    8.67    5.04
  14   6  14   45.29   17.42
 -27   7  14   36.23   10.92
 -25   7  14  240.74   22.32
 -23   7  14  222.39   20.86
 -21   7  14  425.71   16.73
 -19   7  14   78.06    8.60
 -17   7  14   -1.33    3.50
 -15   7  14   53.17    6.00
 -13   7  14  287.66   11.12
 -11   7  14  247.42    8.92
  -9   7  14  128.16    7.40
  -7   7  14   -1.07    2.24
  -5   7  14    2.46    2.62
  -3   7  14  316.02   10.94
  -1   7  14  354.19   10.72
   1   7  14  498.51   13.08
   3   7  14  307.32    9.02
   5   7  14   92.07    6.47
   7   7  14    5.17    3.78
   9   7  14    5.63    4.07
  11   7  14   17.47    5.73
  13   7  14   42.77    7.38
 -26   8  14   27.93   10.30
 -24   8  14   94.75   14.86
 -22   8  14  162.90   18.07
 -20   8  14   71.92   12.82
 -18   8  14   71.37   12.46
 -16   8  14   -1.74    4.19
 -14   8  14    6.62    4.82
 -12   8  14   41.31    4.92
 -10   8  14   -0.91    2.55
  -8   8  14    0.80    2.71
  -6   8  14   27.67    4.42
  -4   8  14  113.04    7.79
  -2   8  14  249.42   11.23
   0   8  14   56.45    5.42
   2   8  14  287.02   10.86
   4   8  14   79.43    5.97
   6   8  14   21.92    4.81
   8   8  14    6.19    4.19
  10   8  14    0.66    4.67
 -25   9  14    3.37    7.68
 -23   9  14   -4.62    6.51
 -21   9  14    4.40    6.98
 -19   9  14   10.28    6.76
 -17   9  14   42.11    7.95
 -15   9  14   26.84    6.55
 -13   9  14  242.63   11.47
 -11   9  14  127.73    9.33
  -9   9  14  202.36   11.35
  -7   9  14   47.89    6.34
  -5   9  14   21.31    4.78
  -3   9  14   37.33    5.80
  -1   9  14    0.44    3.09
   1   9  14   12.40    3.66
   3   9  14   -2.26    3.11
   5   9  14   56.97    6.91
   7   9  14   30.80    5.98
   9   9  14   25.37    6.37
 -22  10  14   37.37   11.37
 -20  10  14    7.98    7.20
 -18  10  14   -3.24    4.95
 -16  10  14  128.39   12.38
 -14  10  14  166.44   10.72
 -12  10  14  570.43   18.00
 -10  10  14  452.89   15.82
  -8  10  14  293.30   13.03
  -6  10  14   79.12    9.46
  -4  10  14   -0.64    4.26
  -2  10  14    1.50    4.65
   0  10  14   88.07    9.52
   2  10  14    8.66    4.58
   4  10  14   30.28    9.23
   6  10  14   94.34   10.14
   8  10  14   77.24    9.67
 -21  11  14   20.57   12.48
 -19  11  14    7.08    6.61
 -17  11  14   59.06   12.09
 -15  11  14   70.27    8.52
 -13  11  14  184.42   13.94
 -11  11  14  314.65   16.32
  -9  11  14  415.91   18.34
  -7  11  14   81.16   10.05
  -5  11  14   24.95    6.62
  -3  11  14    0.41    4.47
  -1  11  14   24.17    6.36
   1  11  14    3.41    4.64
   3  11  14    5.13    7.47
   5  11  14   -7.67    7.64
 -18  12  14    9.50   11.77
 -16  12  14   24.13    6.36
 -14  12  14   21.28    6.57
 -12  12  14    0.44    5.15
 -10  12  14   31.40    7.53
  -8  12  14    7.75    6.04
  -6  12  14   43.07    7.89
  -4  12  14   16.52    6.24
  -2  12  14    3.44    4.84
   0  12  14   -0.25    4.79
   2  12  14   20.69   10.14
   4  12  14   25.98   10.26
 -13  13  14   17.80    7.46
 -11  13  14   23.47    9.13
  -9  13  14    6.71    6.11
  -7  13  14   -3.23    5.18
  -5  13  14   24.68    7.20
  -3  13  14   25.23    7.28
  -1  13  14   70.19    8.96
 -30   0  15   -1.54   12.27
 -28   0  15   -3.82    9.33
 -26   0  15   -3.84    6.22
 -24   0  15   -3.62    5.48
 -22   0  15    1.74    5.14
 -20   0  15   -1.13    4.82
 -18   0  15   -3.82    4.22
 -16   0  15    2.17    4.30
 -14   0  15   -3.66    3.57
 -12   0  15    5.93    4.30
 -10   0  15    2.91    4.31
  -8   0  15   -0.66    2.57
  -6   0  15    3.33    3.35
  -4   0  15   -0.46    2.11
  -2   0  15    0.74    2.34
   0   0  15    1.28    2.70
   2   0  15   -3.33    2.30
   4   0  15    0.16    2.92
   6   0  15   -1.79    3.43
   8   0  15   -0.02    3.83
  10   0  15    3.98    4.36
  12   0  15    2.40    4.27
  14   0  15   -4.00    6.30
 -29   1  15   54.05   12.69
 -27   1  15   63.94    9.29
 -25   1  15   71.42    8.62
 -23   1  15   39.62    6.71
 -21   1  15   34.53    6.14
 -19   1  15  197.98   12.65
 -17   1  15  317.96   13.27
 -15   1  15  568.06   17.99
 -13   1  15  187.52   11.63
 -11   1  15   21.05    4.43
  -9   1  15   63.41    5.60
  -7   1  15  222.32    7.99
  -5   1  15  772.96   14.58
  -3   1  15   81.86    4.58
  -1   1  15   38.26    3.48
   1   1  15    6.05    2.12
   3   1  15    1.98    2.10
   5   1  15  176.22    8.52
   7   1  15   66.37    5.72
   9   1  15   33.92    4.66
  11   1  15   16.76    4.03
  13   1  15   -1.09    3.64
 -30   2  15   64.39   14.02
 -28   2  15  147.18   17.88
 -26   2  15   29.74    6.73
 -24   2  15   93.99    9.71
 -22   2  15    0.89    3.69
 -20   2  15  132.14   10.54
 -18   2  15  463.24   16.50
 -16   2  15  695.59   20.51
 -14   2  15  800.17   22.10
 -12   2  15  215.48   11.83
 -10   2  15   -0.20    2.25
  -8   2  15  280.98   10.10
  -6   2  15  646.61   12.97
  -4   2  15  730.93   14.34
  -2   2  15  172.02    6.07
   0   2  15    3.76    2.07
   2   2  15    2.79    2.03
   4   2  15  304.45    8.48
   6   2  15   73.79    6.03
   8   2  15  117.92    7.57
  10   2  15   42.96    5.09
  12   2  15   -0.73    3.59
  14   2  15    0.30    4.12
 -29   3  15    7.54    7.87
 -27   3  15   -3.08    4.92
 -25   3  15   -1.59    4.39
 -23   3  15   -0.80    4.11
 -21   3  15    9.40    4.64
 -19   3  15  105.45    9.60
 -17   3  15  101.08    9.27
 -15   3  15  138.15   10.17
 -13   3  15   66.89    7.20
 -11   3  15   21.02    3.76
  -9   3  15   -5.10    1.70
  -7   3  15    7.59    2.52
  -5   3  15  142.69    6.53
  -3   3  15    3.87    2.14
  -1   3  15   57.00    4.15
   1   3  15    6.61    2.20
   3   3  15   29.11    3.72
   5   3  15   28.09    3.92
   7   3  15   12.66    3.50
   9   3  15    9.67    3.56
  11   3  15   -2.87    3.46
  13   3  15   -1.35    4.01
 -28   4  15   72.28   12.47
 -26   4  15   72.01    8.98
 -24   4  15    2.54    4.32
 -22   4  15   28.69    6.36
 -20   4  15   -2.43    3.50
 -18   4  15  134.94   10.70
 -16   4  15   26.77    5.38
 -14   4  15   59.88    7.02
 -12   4  15   13.58    3.44
 -10   4  15    3.60    2.72
  -8   4  15   89.34    5.77
  -6   4  15   82.16    5.76
  -4   4  15  159.22    6.94
  -2   4  15  224.94    7.96
   0   4  15    0.57    1.94
   2   4  15    9.64    2.52
   4   4  15    4.56    2.77
   6   4  15   25.51    4.26
   8   4  15   15.83    3.99
  10   4  15    8.95    4.34
  12   4  15   -0.15    4.04
 -27   5  15  185.08   16.23
 -25   5  15  178.54   13.64
 -23   5  15    2.47    4.91
 -21   5  15   -1.79    3.57
 -19   5  15   99.57    9.58
 -17   5  15  365.98   14.84
 -15   5  15  358.70   14.30
 -13   5  15   67.11    6.24
 -11   5  15    3.75    2.80
  -9   5  15   67.11    5.25
  -7   5  15  511.44   12.78
  -5   5  15  473.26   12.45
  -3   5  15  481.80   11.64
  -1   5  15  166.65    8.03
   1   5  15   -0.75    2.09
   3   5  15   39.08    4.18
   5   5  15   87.95    6.66
   7   5  15  122.08    7.65
   9   5  15  242.23   12.46
  11   5  15   -0.59    4.05
  13   5  15    3.10    4.54
 -28   6  15   66.66   18.64
 -26   6  15  132.31   13.86
 -24   6  15   15.64    5.88
 -22   6  15   19.66    5.97
 -20   6  15   34.50    6.46
 -18   6  15   43.60    6.62
 -16   6  15  160.00   11.54
 -14   6  15   99.59    7.81
 -12   6  15    0.62    2.59
 -10   6  15   60.31    5.13
  -8   6  15  259.93    9.35
  -6   6  15  224.19    9.10
  -4   6  15  388.58   11.42
  -2   6  15  146.81    7.99
   0   6  15   22.69    3.92
   2   6  15   -0.10    2.30
   4   6  15   79.40    6.21
   6   6  15   67.61    5.95
   8   6  15  149.67   10.17
  10   6  15   13.32    4.85
  12   6  15    1.54    4.54
 -27   7  15   -2.46    9.68
 -25   7  15   -0.05    6.45
 -23   7  15   -6.87    4.31
 -21   7  15   11.70    5.06
 -19   7  15    2.55    4.13
 -17   7  15   18.00    5.14
 -15   7  15   13.30    3.96
 -13   7  15   39.11    5.38
 -11   7  15   -0.45    2.22
  -9   7  15   -1.18    2.11
  -7   7  15    8.93    3.18
  -5   7  15    2.59    2.93
  -3   7  15    2.44    3.14
  -1   7  15    2.03    2.78
   1   7  15    2.83    2.96
   3   7  15    1.92    2.89
   5   7  15    4.80    3.30
   7   7  15    0.74    3.84
   9   7  15   -1.25    4.06
  11   7  15    7.12    4.87
 -24   8  15    1.87    7.60
 -22   8  15   -0.82    6.63
 -20   8  15   46.02   11.04
 -18   8  15  205.72   20.33
 -16   8  15  268.76   15.48
 -14   8  15  164.67   13.27
 -12   8  15  102.00    7.34
 -10   8  15    0.27    2.80
  -8   8  15   71.07    6.52
  -6   8  15  147.47    9.08
  -4   8  15  259.62   12.06
  -2   8  15   12.99    3.84
   0   8  15   26.01    4.32
   2   8  15    6.76    3.28
   4   8  15   29.28    4.34
   6   8  15   68.01    7.23
   8   8  15   61.90    7.25
  10   8  15   12.89    5.12
 -23   9  15    8.44    7.64
 -21   9  15   20.64    9.27
 -19   9  15  102.78   15.50
 -17   9  15  200.91   15.66
 -15   9  15  227.22   16.05
 -13   9  15  125.54    9.17
 -11   9  15   11.33    4.53
  -9   9  15   41.71    6.31
  -7   9  15  115.63    9.25
  -5   9  15  260.03   12.40
  -3   9  15  156.03   10.84
  -1   9  15   55.59    6.39
   1   9  15    4.99    3.36
   3   9  15   21.90    4.91
   5   9  15   75.67    7.76
   7   9  15   91.25    9.28
 -22  10  15    7.33   10.57
 -20  10  15    3.54    7.19
 -18  10  15    1.23    5.18
 -16  10  15   32.24    7.67
 -14  10  15   28.48    5.36
 -12  10  15   -2.69    3.91
 -10  10  15    1.53    4.24
  -8  10  15   27.31    5.49
  -6  10  15    1.56    4.86
  -4  10  15   33.78    6.76
  -2  10  15    2.51    4.75
   0  10  15   -3.22    4.43
   2  10  15    0.89    4.78
   4  10  15   34.92    9.71
   6  10  15    5.32    5.31
 -19  11  15    7.46    8.87
 -17  11  15  152.27   17.86
 -15  11  15   27.92    9.67
 -13  11  15   19.05    6.52
 -11  11  15    4.88    5.20
  -9  11  15    3.04    5.15
  -7  11  15   24.39    6.83
  -5  11  15   26.10    6.79
  -3  11  15  114.26   11.49
  -1  11  15   11.65    5.59
   1  11  15   -0.90    5.20
   3  11  15    3.32    7.92
 -16  12  15  138.64   23.34
 -14  12  15  163.39   14.81
 -12  12  15   18.25    6.63
 -10  12  15   -0.52    5.18
  -8  12  15   21.31    7.12
  -6  12  15  156.17   13.60
  -4  12  15   94.34   10.89
  -2  12  15   58.72    8.93
   0  12  15    3.26    5.32
 -11  13  15   12.07   10.17
  -9  13  15    0.30    7.16
  -7  13  15   18.29    8.64
  -5  13  15   89.72   15.91
 -28   0  16  193.34   30.09
 -26   0  16   12.12    8.22
 -24   0  16   47.73   10.72
 -22   0  16  143.80   16.41
 -20   0  16   39.21    9.45
 -18   0  16   99.60   13.57
 -16   0  16  192.86   17.41
 -14   0  16  344.08   19.67
 -12   0  16  885.34   33.85
 -10   0  16 1530.19   48.89
  -8   0  16 1266.54   33.33
  -6   0  16  263.63   13.33
  -4   0  16  182.94    8.62
  -2   0  16  250.57   10.20
   0   0  16  158.14    9.42
   2   0  16    1.96    3.20
   4   0  16   17.58    5.32
   6   0  16   -1.23    3.52
   8   0  16   59.69    8.47
  10   0  16  156.95   12.79
  12   0  16  127.98   11.43
 -29   1  16   61.40   13.66
 -27   1  16  120.10   11.31
 -25   1  16   10.58    5.07
 -23   1  16   35.20    6.61
 -21   1  16    3.56    4.01
 -19   1  16   15.46    4.86
 -17   1  16   44.42    6.56
 -15   1  16   86.14    8.52
 -13   1  16  530.35   17.47
 -11   1  16  778.56   21.94
  -9   1  16  692.31   17.51
  -7   1  16  809.59   17.28
  -5   1  16    2.50    2.09
  -3   1  16  257.37    7.15
  -1   1  16   -0.10    1.90
   1   1  16    4.64    2.28
   3   1  16    0.83    2.24
   5   1  16    0.41    2.77
   7   1  16   28.35    4.47
   9   1  16   53.55    5.82
  11   1  16   68.57    6.41
  13   1  16   66.01    7.40
 -28   2  16    6.66    6.31
 -26   2  16  184.79   13.86
 -24   2  16   54.21    8.19
 -22   2  16  133.87   11.54
 -20   2  16   89.60    9.05
 -18   2  16  144.95   11.10
 -16   2  16   26.30    5.42
 -14   2  16   98.05    9.00
 -12   2  16   29.69    5.38
 -10   2  16   48.07    5.55
  -8   2  16   90.25    7.09
  -6   2  16   38.88    3.75
  -4   2  16    4.98    2.31
  -2   2  16   26.95    3.14
   0   2  16  406.71    9.81
   2   2  16  145.81    7.04
   4   2  16  143.81    7.54
   6   2  16  149.16    8.48
   8   2  16    8.05    3.66
  10   2  16    2.37    3.43
  12   2  16    3.92    4.32
 -29   3  16   -0.64    7.39
 -27   3  16   14.53    6.39
 -25   3  16  206.98   14.34
 -23   3  16  522.95   19.37
 -21   3  16  416.73   16.71
 -19   3  16  395.42   15.80
 -17   3  16   91.43    8.84
 -15   3  16   24.68    5.03
 -13   3  16   22.35    5.03
 -11   3  16  105.01    7.74
  -9   3  16   72.59    6.45
  -7   3  16   46.96    4.39
  -5   3  16    8.02    2.51
  -3   3  16   38.62    4.10
  -1   3  16  237.56    7.42
   1   3  16  422.61   10.83
   3   3  16  612.41   13.86
   5   3  16  221.26    9.31
   7   3  16   44.46    5.23
   9   3  16    1.27    3.26
  11   3  16    9.66    4.69
 -28   4  16    1.39    6.46
 -26   4  16   50.27    8.18
 -24   4  16  144.65   12.55
 -22   4  16  477.06   18.30
 -20   4  16  288.37   15.51
 -18   4  16  121.09   10.54
 -16   4  16   66.91    7.89
 -14   4  16   12.63    4.24
 -12   4  16  145.99    9.36
 -10   4  16  107.87    7.99
  -8   4  16  178.90    7.79
  -6   4  16    7.39    2.88
  -4   4  16   -2.77    2.02
  -2   4  16  100.70    6.41
   0   4  16  166.20    6.98
   2   4  16  419.82   10.32
   4   4  16  219.78    9.32
   6   4  16   47.84    5.30
   8   4  16   -3.25    3.15
  10   4  16    4.07    4.29
  12   4  16   52.04    7.11
 -27   5  16   -1.73    5.81
 -25   5  16    3.05    5.28
 -23   5  16   -3.40    4.60
 -21   5  16   13.92    5.10
 -19   5  16    6.95    4.42
 -17   5  16    6.78    4.48
 -15   5  16   -2.22    3.20
 -13   5  16    1.91    2.94
 -11   5  16   14.34    4.03
  -9   5  16    6.04    2.70
  -7   5  16    1.11    2.39
  -5   5  16    0.53    2.46
  -3   5  16   -1.71    2.27
  -1   5  16    2.58    2.67
   1   5  16   38.91    4.48
   3   5  16    6.27    3.04
   5   5  16    3.50    3.28
   7   5  16    4.37    3.47
   9   5  16    4.74    4.40
  11   5  16    6.02    4.44
 -26   6  16    6.50    5.96
 -24   6  16  110.02   10.78
 -22   6  16  208.63   14.57
 -20   6  16  158.40   12.23
 -18   6  16   96.48    9.67
 -16   6  16   10.48    4.72
 -14   6  16    1.43    3.16
 -12   6  16  116.73    8.48
 -10   6  16  109.18    6.90
  -8   6  16   75.08    6.10
  -6   6  16   29.38    4.30
  -4   6  16    2.15    2.83
  -2   6  16   30.88    4.44
   0   6  16   93.17    7.00
   2   6  16  137.28    7.39
   4   6  16  103.00    7.20
   6   6  16   13.84    4.10
   8   6  16    5.47    4.55
  10   6  16    4.91    4.61
 -25   7  16  150.58   18.37
 -23   7  16  167.03   13.61
 -21   7  16  492.37   22.60
 -19   7  16  228.77   17.73
 -17   7  16  111.53   12.40
 -15   7  16   22.03    5.50
 -13   7  16   81.65    8.79
 -11   7  16  145.20    7.80
  -9   7  16  208.39    9.19
  -7   7  16    6.24    3.40
  -5   7  16   -2.46    2.80
  -3   7  16   49.03    5.74
  -1   7  16  164.03    9.15
   1   7  16  348.69   12.66
   3   7  16  286.51   10.38
   5   7  16  114.68    7.62
   7   7  16   10.97    4.78
   9   7  16   -2.28    4.21
 -24   8  16   78.65   14.31
 -22   8  16  167.28   18.72
 -20   8  16  102.72   15.48
 -18   8  16   78.51   13.40
 -16   8  16   48.79    8.15
 -14   8  16   18.22    6.02
 -12   8  16   -0.52    2.89
 -10   8  16    3.87    3.27
  -8   8  16   17.74    4.19
  -6   8  16   42.31    6.29
  -4   8  16    6.27    3.67
  -2   8  16  117.37    8.67
   0   8  16   68.59    6.35
   2   8  16  231.16   11.57
   4   8  16   97.65    6.88
   6   8  16   43.57    6.15
   8   8  16    2.17    4.56
 -23   9  16   -3.83   10.01
 -21   9  16    0.96    7.12
 -19   9  16    3.63    7.68
 -17   9  16    4.06    6.12
 -15   9  16   54.51    8.91
 -13   9  16  117.75    8.97
 -11   9  16  206.62   11.59
  -9   9  16  105.19    9.21
  -7   9  16  119.76    9.97
  -5   9  16   83.13    8.36
  -3   9  16   32.42    6.19
  -1   9  16    1.44    3.42
   1   9  16   24.84    4.87
   3   9  16   -3.05    3.75
   5   9  16   26.90    5.70
 -20  10  16   32.73   13.55
 -18  10  16    1.15    5.76
 -16  10  16   -0.57    5.42
 -14  10  16  207.76   11.33
 -12  10  16  254.70   12.88
 -10  10  16  510.56   17.62
  -8  10  16  303.41   14.02
  -6  10  16  286.82   16.08
  -4  10  16    1.40    5.15
  -2  10  16   13.77    5.84
   0  10  16   12.48    5.79
   2  10  16    1.32    5.08
   4  10  16    0.42    7.72
 -17  11  16   31.91   12.89
 -15  11  16   38.38   10.57
 -13  11  16  153.60   12.73
 -11  11  16  195.46   14.12
  -9  11  16  342.04   17.69
  -7  11  16  171.25   14.40
  -5  11  16   31.04    7.36
  -3  11  16   45.38    8.38
  -1  11  16    8.92    5.84
   1  11  16    1.85    6.26
 -14  12  16    0.93    6.12
 -12  12  16   23.01    8.26
 -10  12  16   21.39    8.22
  -8  12  16   23.24    7.56
  -6  12  16    1.49    5.82
  -4  12  16   21.80    7.15
 -28   0  17   -1.07    7.14
 -26   0  17   -3.70    6.61
 -24   0  17   -7.59    5.16
 -22   0  17   -3.62    5.35
 -20   0  17   -2.40    5.08
 -18   0  17   -2.05    4.87
 -16   0  17    0.62    4.74
 -14   0  17    1.93    5.00
 -12   0  17   -3.31    4.24
 -10   0  17   -0.30    4.13
  -8   0  17   -4.52    3.27
  -6   0  17   -0.89    3.10
  -4   0  17   -0.49    2.62
  -2   0  17   -3.70    2.72
   0   0  17    4.65    3.47
   2   0  17   -1.28    3.03
   4   0  17    0.74    4.08
   6   0  17    1.56    4.50
   8   0  17    2.77    4.87
  10   0  17   -1.42    4.95
 -29   1  17   21.67   10.59
 -27   1  17   72.86    9.78
 -25   1  17  147.63   12.70
 -23   1  17  116.67   10.94
 -21   1  17    7.04    4.28
 -19   1  17   -0.51    3.50
 -17   1  17  151.15   11.59
 -15   1  17  199.36   12.88
 -13   1  17  272.70   12.99
 -11   1  17   60.65    7.43
  -9   1  17   -2.99    3.01
  -7   1  17   12.73    3.56
  -5   1  17  793.23   15.59
  -3   1  17  148.00    6.27
  -1   1  17  298.50    8.54
   1   1  17    9.87    2.75
   3   1  17   -0.59    2.37
   5   1  17   12.70    3.73
   7   1  17   28.72    4.76
   9   1  17   18.36    4.35
  11   1  17   10.11    4.21
 -28   2  17  258.94   19.70
 -26   2  17  115.37   11.61
 -24   2  17  245.26   15.97
 -22   2  17   29.72    6.32
 -20   2  17   28.20    6.23
 -18   2  17  148.94   11.56
 -16   2  17  234.98   14.17
 -14   2  17  259.81   13.23
 -12   2  17  257.42   12.71
 -10   2  17   -2.05    3.04
  -8   2  17   99.50    7.67
  -6   2  17  176.46    8.04
  -4   2  17  515.28   12.23
  -2   2  17  552.46   11.64
   0   2  17  114.93    6.31
   2   2  17   36.77    4.07
   4   2  17   -3.94    2.70
   6   2  17   34.60    4.88
   8   2  17   13.86    4.20
  10   2  17    8.93    4.22
 -27   3  17   76.97   10.25
 -25   3  17   37.87    7.69
 -23   3  17    9.36    5.18
 -21   3  17   95.28   10.04
 -19   3  17    4.61    4.54
 -17   3  17    4.05    3.91
 -15   3  17    9.76    4.22
 -13   3  17    3.52    3.62
 -11   3  17   35.47    5.89
  -9   3  17  129.97    8.93
  -7   3  17   -0.50    2.45
  -5   3  17  129.55    7.23
  -3   3  17  145.90    7.70
  -1   3  17  275.69    8.27
   1   3  17   10.54    2.77
   3   3  17   37.90    4.76
   5   3  17   21.68    4.30
   7   3  17   23.09    4.64
   9   3  17   11.39    4.14
 -28   4  17    1.77    6.29
 -26   4  17   19.99    6.36
 -24   4  17   -1.19    4.74
 -22   4  17   -2.96    4.44
 -20   4  17    4.95    4.63
 -18   4  17   54.81    7.73
 -16   4  17  126.65   10.58
 -14   4  17  295.53   14.09
 -12   4  17  245.84   14.59
 -10   4  17   95.70    7.80
  -8   4  17   25.60    3.84
  -6   4  17    6.72    2.99
  -4   4  17   11.48    3.04
  -2   4  17   10.94    3.20
   0   4  17    3.11    2.45
   2   4  17   46.85    4.85
   4   4  17   55.69    5.66
   6   4  17  100.08    7.63
   8   4  17   44.53    5.73
  10   4  17   29.79    6.05
 -27   5  17   59.24   10.71
 -25   5  17   65.54    9.41
 -23   5  17   17.31    6.06
 -21   5  17   -2.12    4.50
 -19   5  17   51.72    7.59
 -17   5  17  303.93   15.37
 -15   5  17  529.66   18.77
 -13   5  17  588.04   19.68
 -11   5  17  302.53   11.83
  -9   5  17   50.35    4.98
  -7   5  17    1.28    2.59
  -5   5  17   90.93    6.77
  -3   5  17  127.00    7.43
  -1   5  17   57.49    5.30
   1   5  17   -1.03    2.31
   3   5  17   45.62    5.18
   5   5  17  144.36    8.64
   7   5  17  164.19    9.41
   9   5  17  151.95   10.91
 -26   6  17   34.83    7.91
 -24   6  17   15.23    6.26
 -22   6  17   -1.64    4.77
 -20   6  17   15.16    5.74
 -18   6  17  107.00   10.65
 -16   6  17  216.08   14.09
 -14   6  17  452.46   17.28
 -12   6  17  132.46    9.48
 -10   6  17  129.61    7.34
  -8   6  17    6.06    3.14
  -6   6  17    5.24    3.09
  -4   6  17   30.39    4.67
  -2   6  17   20.97    4.00
   0   6  17    3.35    3.36
   2   6  17   25.80    4.27
   4   6  17   53.70    5.68
   6   6  17   84.05    7.02
   8   6  17   66.77    7.68
 -25   7  17    6.91    6.51
 -23   7  17   27.36    8.39
 -21   7  17   -1.08    4.88
 -19   7  17    0.27    4.40
 -17   7  17    2.22    4.70
 -15   7  17   -0.67    4.13
 -13   7  17   29.15    5.36
 -11   7  17    1.19    2.76
  -9   7  17    7.92    3.18
  -7   7  17   15.88    4.31
  -5   7  17   55.10    6.24
  -3   7  17   30.95    5.13
  -1   7  17    4.77    3.47
   1   7  17   26.55    5.27
   3   7  17   33.72    4.82
   5   7  17   34.51    5.09
   7   7  17   -0.10    4.33
 -22   8  17   33.49   11.36
 -20   8  17   -5.61    6.66
 -18   8  17   32.18    9.96
 -16   8  17  113.59   12.54
 -14   8  17   27.56    7.30
 -12   8  17   58.76    7.54
 -10   8  17    0.89    3.32
  -8   8  17    4.83    3.40
  -6   8  17  154.16    9.88
  -4   8  17  289.55   12.38
  -2   8  17  217.12   12.03
   0   8  17   37.82    5.38
   2   8  17   56.52    6.92
   4   8  17    0.43    4.19
   6   8  17   -0.75    4.32
 -21   9  17   47.46   17.16
 -19   9  17   23.09    9.91
 -17   9  17   45.18    8.79
 -15   9  17  155.30   13.98
 -13   9  17   56.15    6.60
 -11   9  17   77.90    8.04
  -9   9  17    0.30    4.03
  -7   9  17   31.59    6.21
  -5   9  17  193.92   12.99
  -3   9  17  221.86   13.15
  -1   9  17  106.72    8.67
   1   9  17   21.85    5.26
   3   9  17    0.84    4.67
 -18  10  17    9.52    8.08
 -16  10  17   11.18    6.55
 -14  10  17    8.19    6.29
 -12  10  17    1.15    4.10
 -10  10  17    0.06    4.24
  -8  10  17    7.10    4.82
  -6  10  17   -2.36    5.12
  -4  10  17   46.78    8.27
  -2  10  17    2.90    5.50
   0  10  17    3.85    6.39
   2  10  17   -0.09   11.58
 -15  11  17   95.91   20.09
 -13  11  17    1.78    5.50
 -11  11  17    8.27    5.62
  -9  11  17   -1.47    5.19
  -7  11  17    9.85    6.54
  -5  11  17    8.94    6.18
  -3  11  17   19.98    7.09
 -28   0  18  115.12   16.72
 -26   0  18   15.37    8.95
 -24   0  18   -1.03    6.75
 -22   0  18  140.96   16.64
 -20   0  18   98.97   14.48
 -18   0  18  138.92   16.78
 -16   0  18   -0.26    5.08
 -14   0  18   33.84    8.65
 -12   0  18  176.95   17.13
 -10   0  18  392.36   22.15
  -8   0  18  212.72   19.21
  -6   0  18  446.21   18.25
  -4   0  18  323.75   11.81
  -2   0  18   12.21    3.96
   0   0  18    2.36    3.47
   2   0  18   88.05    8.48
   4   0  18   64.18    8.66
   6   0  18   35.60    7.32
   8   0  18    3.46    5.39
 -27   1  18   23.71    7.39
 -25   1  18   -4.38    4.88
 -23   1  18   12.88    5.56
 -21   1  18   33.45    6.79
 -19   1  18   34.49    6.54
 -17   1  18    3.07    4.29
 -15   1  18    7.67    4.24
 -13   1  18   50.52    7.24
 -11   1  18  217.48   13.44
  -9   1  18   16.49    4.88
  -7   1  18  466.61   14.80
  -5   1  18  137.31    6.83
  -3   1  18  103.25    5.61
  -1   1  18    9.79    2.80
   1   1  18    5.03    2.60
   3   1  18   19.83    4.19
   5   1  18   17.54    4.18
   7   1  18    9.10    4.14
   9   1  18   -2.17    3.66
 -28   2  18   -0.13    5.72
 -26   2  18    8.13    5.99
 -24   2  18   29.76    6.87
 -22   2  18   18.80    6.08
 -20   2  18  120.26   11.09
 -18   2  18   58.01    8.19
 -16   2  18   54.59    7.72
 -14   2  18   49.22    7.09
 -12   2  18    2.37    3.63
 -10   2  18   10.17    4.39
  -8   2  18    2.56    3.18
  -6   2  18   48.36    4.78
  -4   2  18    5.09    2.62
  -2   2  18    6.20    2.51
   0   2  18    8.75    2.80
   2   2  18   16.65    3.64
   4   2  18   12.09    3.99
   6   2  18   16.50    4.23
   8   2  18    6.05    3.99
 -27   3  18   26.54    7.39
 -25   3  18   13.42    6.20
 -23   3  18  139.07   12.17
 -21   3  18  316.40   16.29
 -19   3  18  323.49   15.29
 -17   3  18  359.57   15.66
 -15   3  18   56.22    7.72
 -13   3  18    3.05    3.82
 -11   3  18   94.55    9.39
  -9   3  18  232.47   11.33
  -7   3  18   63.28    5.47
  -5   3  18   63.83    5.78
  -3   3  18   -2.18    2.49
  -1   3  18   47.35    4.33
   1   3  18   49.92    4.72
   3   3  18  159.28    9.19
   5   3  18   50.21    5.91
   7   3  18   77.59    7.07
 -26   4  18   -1.60    5.38
 -24   4  18    7.47    5.59
 -22   4  18  176.10   13.75
 -20   4  18  300.74   15.94
 -18   4  18  210.04   14.41
 -16   4  18  241.62   14.12
 -14   4  18   -0.51    3.97
 -12   4  18   17.94    5.23
 -10   4  18  226.48   11.32
  -8   4  18  129.80    7.27
  -6   4  18  109.83    7.42
  -4   4  18   34.21    4.78
  -2   4  18   14.27    3.56
   0   4  18   15.37    3.19
   2   4  18  179.50    8.52
   4   4  18   39.74    5.28
   6   4  18   39.25    5.36
   8   4  18    6.06    4.05
 -25   5  18    5.42    5.82
 -23   5  18    1.47    5.16
 -21   5  18    4.17    4.96
 -19   5  18    2.59    4.62
 -17   5  18    8.26    4.95
 -15   5  18    2.93    4.31
 -13   5  18    8.20    4.30
 -11   5  18   38.00    5.80
  -9   5  18    2.05    2.69
  -7   5  18    6.73    3.26
  -5   5  18   -6.13    2.59
  -3   5  18   -1.80    2.87
  -1   5  18    3.71    3.16
   1   5  18    7.74    3.34
   3   5  18   19.35    4.23
   5   5  18    5.01    3.75
   7   5  18    0.82    3.73
 -24   6  18   32.25    7.49
 -22   6  18   61.08    9.19
 -20   6  18  129.40   11.91
 -18   6  18  115.18   11.24
 -16   6  18   60.87    8.48
 -14   6  18    3.16    4.30
 -12   6  18    1.72    3.74
 -10   6  18   71.34    5.98
  -8   6  18   72.97    6.27
  -6   6  18   58.01    5.97
  -4   6  18    7.86    3.76
  -2   6  18   -1.70    3.08
   0   6  18   24.85    4.75
   2   6  18   56.37    5.52
   4   6  18   50.99    5.87
   6   6  18   37.46    5.26
 -23   7  18   85.40   13.03
 -21   7  18  196.88   14.71
 -19   7  18  289.71   17.36
 -17   7  18  160.94   13.03
 -15   7  18   81.08    9.46
 -13   7  18   -3.31    3.52
 -11   7  18   58.98    7.08
  -9   7  18  121.09    8.05
  -7   7  18  113.71    8.52
  -5   7  18   37.36    5.72
  -3   7  18    5.71    4.01
  -1   7  18   19.12    4.47
   1   7  18   77.74    7.88
   3   7  18  152.44   10.55
   5   7  18   71.64    6.68
 -22   8  18   52.51   17.20
 -20   8  18   89.30   15.53
 -18   8  18   56.06   12.40
 -16   8  18   77.16   14.09
 -14   8  18    3.78    5.71
 -12   8  18    3.66    4.24
 -10   8  18    2.59    3.50
  -8   8  18   21.14    4.68
  -6   8  18   17.68    4.71
  -4   8  18    5.08    3.95
  -2   8  18   51.98    6.79
   0   8  18    8.82    4.76
   2   8  18   48.57    7.04
 -19   9  18   10.47   12.63
 -17   9  18    7.36    6.40
 -15   9  18   -2.01    5.75
 -13   9  18   18.79    7.18
 -11   9  18   41.69    6.56
  -9   9  18   56.86    7.37
  -7   9  18   42.81    6.85
  -5   9  18    6.26    5.15
  -3   9  18   29.03    6.37
  -1   9  18    6.36    4.78
   1   9  18   -2.17    4.31
 -16  10  18   18.73    8.64
 -14  10  18    7.34    7.62
 -12  10  18   67.20    7.70
 -10  10  18  109.15    9.94
  -8  10  18  120.54   11.17
  -6  10  18  233.34   16.89
  -4  10  18   16.92    6.85
  -2  10  18   34.29    8.06
  -9  11  18   43.29   13.59
 -26   0  19    3.38    7.90
 -24   0  19   -1.58    6.82
 -22   0  19    4.20    6.78
 -20   0  19    2.55    6.73
 -18   0  19   -3.63    4.97
 -16   0  19   -8.02    4.85
 -14   0  19   -0.59    5.08
 -12   0  19   -1.49    4.37
 -10   0  19   -0.34    5.13
  -8   0  19    4.76    5.67
  -6   0  19    0.97    4.12
  -4   0  19    0.02    2.90
  -2   0  19    0.71    3.41
   0   0  19   -1.53    3.41
   2   0  19    5.28    4.86
   4   0  19   -0.64    4.45
   6   0  19   -1.86    4.98
 -27   1  19   31.76    8.36
 -25   1  19  160.10   13.81
 -23   1  19   81.16    9.81
 -21   1  19  149.77   12.57
 -19   1  19    1.14    4.17
 -17   1  19    4.61    4.49
 -15   1  19  117.62   10.76
 -13   1  19   91.79    9.62
 -11   1  19   45.02    7.15
  -9   1  19  107.10   10.46
  -7   1  19    3.59    3.42
  -5   1  19  114.65    8.16
  -3   1  19  336.61   10.35
  -1   1  19   91.88    6.08
   1   1  19  180.64    8.76
   3   1  19    7.24    3.70
   5   1  19   -1.81    3.39
   7   1  19    2.98    3.86
 -26   2  19  115.59   12.18
 -24   2  19  271.83   17.60
 -22   2  19  179.83   13.91
 -20   2  19   93.98   10.29
 -18   2  19   14.18    5.56
 -16   2  19   39.71    6.78
 -14   2  19   70.60    8.67
 -12   2  19   62.44    7.92
 -10   2  19  189.63   13.15
  -8   2  19   -0.77    3.04
  -6   2  19   97.24    6.63
  -4   2  19  218.75    9.08
  -2   2  19  454.32   12.46
   0   2  19  235.20    8.79
   2   2  19  149.93    8.94
   4   2  19   15.28    4.34
   6   2  19    0.97    3.65
 -25   3  19   64.13    9.80
 -23   3  19   64.79    9.14
 -21   3  19   97.26   10.52
 -19   3  19   52.59    8.10
 -17   3  19    1.48    4.55
 -15   3  19   -1.78    4.00
 -13   3  19    2.88    4.03
 -11   3  19    1.49    4.06
  -9   3  19   11.22    4.14
  -7   3  19   57.40    6.63
  -5   3  19  149.01    8.76
  -3   3  19   68.30    6.05
  -1   3  19  200.48    8.13
   1   3  19   73.02    6.06
   3   3  19   11.76    4.13
   5   3  19   80.44    7.12
 -24   4  19    2.07    5.18
 -22   4  19   -0.97    4.98
 -20   4  19    7.06    5.34
 -18   4  19  122.25   11.40
 -16   4  19   55.75    8.07
 -14   4  19  282.88   15.92
 -12   4  19  236.05   15.04
 -10   4  19  223.72   12.08
  -8   4  19   66.00    7.24
  -6   4  19   16.81    3.87
  -4   4  19    4.72    3.38
  -2   4  19    1.44    3.20
   0   4  19   -0.93    3.24
   2   4  19    5.54    3.67
   4   4  19   27.47    4.80
   6   4  19   51.89    6.24
 -25   5  19   19.39    7.98
 -23   5  19   50.88    8.72
 -21   5  19    5.18    5.51
 -19   5  19   36.14    7.38
 -17   5  19  180.67   13.80
 -15   5  19  365.81   16.48
 -13   5  19  575.71   20.73
 -11   5  19  570.28   17.73
  -9   5  19  299.00   13.34
  -7   5  19   48.42    5.56
  -5   5  19   -4.87    3.00
  -3   5  19   18.32    4.45
  -1   5  19    0.60    3.21
   1   5  19   -1.40    3.94
   3   5  19    1.92    3.46
   5   5  19   53.08    6.18
 -22   6  19    3.68    5.54
 -20   6  19    3.36    5.13
 -18   6  19   94.68   10.51
 -16   6  19  113.22   11.03
 -14   6  19  397.29   17.22
 -12   6  19  205.46   12.48
 -10   6  19  309.11   14.17
  -8   6  19  121.61    8.20
  -6   6  19   18.23    4.30
  -4   6  19    5.46    3.70
  -2   6  19    0.38    3.59
   0   6  19    4.08    4.22
   2   6  19    3.66    4.62
   4   6  19    8.82    4.07
 -21   7  19   24.04    7.90
 -19   7  19   -2.11    5.27
 -17   7  19   29.50    6.91
 -15   7  19   17.02    6.05
 -13   7  19   27.94    5.89
 -11   7  19   12.13    4.86
  -9   7  19   30.02    4.95
  -7   7  19   26.16    5.27
  -5   7  19   13.72    4.72
  -3   7  19   58.54    7.33
  -1   7  19   42.95    6.63
   1   7  19   69.67    7.84
 -20   8  19   52.73   17.26
 -18   8  19    4.56   10.60
 -16   8  19   32.95   10.65
 -14   8  19   11.54    6.55
 -12   8  19   43.81    7.52
 -10   8  19    6.28    3.97
  -8   8  19   -2.85    3.58
  -6   8  19   43.98    6.19
  -4   8  19   54.27    6.84
  -2   8  19  223.10   12.63
   0   8  19   84.14    8.43
 -17   9  19    1.44    7.87
 -15   9  19   58.44   12.51
 -13   9  19   47.79    9.41
 -11   9  19   63.84    7.62
  -9   9  19    6.44    4.87
  -7   9  19    1.89    4.86
  -5   9  19   45.56    7.72
  -3   9  19   80.79    9.15
 -12  10  19    4.01    5.83
 -10  10  19   19.45    6.27
  -8  10  19    3.23    8.73
 -26   0  20  101.60   24.24
 -24   0  20    8.37    8.34
 -22   0  20   13.08    8.15
 -20   0  20  345.14   23.30
 -18   0  20  223.51   21.98
 -16   0  20  307.56   23.02
 -14   0  20   75.62   13.02
 -12   0  20    1.59    5.80
 -10   0  20  218.97   21.14
  -8   0  20  126.94   16.13
  -6   0  20   15.58    5.88
  -4   0  20  150.73   13.74
  -2   0  20   -4.19    3.43
   0   0  20   27.11    5.72
   2   0  20    4.18    5.22
   4   0  20   80.03   10.36
 -25   1  20   12.77    6.44
 -23   1  20    6.72    5.72
 -21   1  20   22.53    6.56
 -19   1  20  123.80   11.81
 -17   1  20  144.71   12.61
 -15   1  20   71.79    8.97
 -13   1  20   82.27    9.51
 -11   1  20   85.72    9.48
  -9   1  20    1.72    3.84
  -7   1  20   95.12    8.62
  -5   1  20    6.11    3.42
  -3   1  20    8.88    3.34
  -1   1  20    3.53    2.79
   1   1  20   61.18    6.24
   3   1  20   27.83    5.06
   5   1  20   54.70    6.43
 -24   2  20    6.35    5.57
 -22   2  20    4.98    5.11
 -20   2  20   27.09    7.02
 -18   2  20   -4.80    4.29
 -16   2  20    0.20    4.16
 -14   2  20   -3.08    4.03
 -12   2  20    5.82    4.69
 -10   2  20    3.49    4.30
  -8   2  20   59.90    7.20
  -6   2  20    0.17    3.63
  -4   2  20   43.13    4.84
  -2   2  20    1.85    3.24
   0   2  20   10.56    3.58
   2   2  20    8.36    3.79
   4   2  20    1.35    3.82
 -25   3  20   19.02    8.23
 -23   3  20    3.80    5.48
 -21   3  20   71.64    9.69
 -19   3  20  148.47   12.83
 -17   3  20  137.80   12.35
 -15   3  20   78.36    9.66
 -13   3  20   -1.14    4.21
 -11   3  20    4.81    4.68
  -9   3  20   98.77    8.75
  -7   3  20  199.86   12.09
  -5   3  20   93.50    7.37
  -3   3  20  128.03    7.99
  -1   3  20    4.28    3.55
   1   3  20    3.75    3.57
   3   3  20   16.41    4.58
 -24   4  20   -2.19    5.95
 -22   4  20   16.55    6.32
 -20   4  20   87.89   10.55
 -18   4  20   96.97   10.74
 -16   4  20   97.28   10.56
 -14   4  20    6.48    4.71
 -12   4  20   -2.75    3.97
 -10   4  20   11.59    4.49
  -8   4  20  131.21    9.99
  -6   4  20  109.73    7.85
  -4   4  20   62.52    6.34
  -2   4  20   48.71    5.60
   0   4  20   -2.36    3.67
   2   4  20   23.44    4.78
 -23   5  20    2.98    6.72
 -21   5  20   -3.96    4.72
 -19   5  20    0.95    5.17
 -17   5  20    0.50    4.59
 -15   5  20   -2.65    4.47
 -13   5  20   14.60    5.75
 -11   5  20   -2.19    3.88
  -9   5  20    6.52    4.46
  -7   5  20   12.88    3.92
  -5   5  20    2.38    3.54
  -3   5  20    2.92    3.75
  -1   5  20   -0.19    4.29
   1   5  20   -5.57    4.06
 -22   6  20   18.48    9.45
 -20   6  20   37.42    8.46
 -18   6  20  105.86   11.37
 -16   6  20   76.88   10.04
 -14   6  20   30.52    7.08
 -12   6  20   21.55    5.56
 -10   6  20   14.16    5.23
  -8   6  20   50.49    5.92
  -6   6  20   33.51    5.25
  -4   6  20   61.42    7.42
  -2   6  20   11.79    4.72
   0   6  20   -0.87    4.37
 -19   7  20  104.20   16.26
 -17   7  20  126.61   13.29
 -15   7  20   65.82    9.63
 -13   7  20    6.85    4.81
 -11   7  20   17.81    5.73
  -9   7  20   63.90    6.47
  -7   7  20  121.61    9.44
  -5   7  20   75.16    7.94
  -3   7  20   49.20    7.02
  -1   7  20   37.30    6.74
 -16   8  20   27.56   14.98
 -14   8  20    5.49    8.15
 -12   8  20    1.77    5.52
 -10   8  20    5.57    4.20
  -8   8  20   26.68    5.55
  -6   8  20   13.04    4.84
  -4   8  20   19.51    5.62
 -11   9  20    4.10    5.58
  -9   9  20   -3.67    9.11
 -24   0  21   -7.87   10.12
 -22   0  21    6.23    7.99
 -20   0  21    2.77    7.27
 -18   0  21    5.62    7.76
 -16   0  21    2.88    6.68
 -14   0  21    1.48    6.63
 -12   0  21   -1.83    5.98
 -10   0  21    9.40    7.21
  -8   0  21   -1.22    5.91
  -6   0  21    0.02    5.22
  -4   0  21    0.17    5.46
  -2   0  21    0.43    3.94
   0   0  21   -1.95    4.94
   2   0  21   -0.25    5.03
 -23   1  21  122.17   13.43
 -21   1  21   96.99   11.40
 -19   1  21   44.52    8.46
 -17   1  21   12.46    5.62
 -15   1  21    2.44    4.96
 -13   1  21   65.87    9.04
 -11   1  21   57.35    8.66
  -9   1  21   64.48    8.72
  -7   1  21   23.77    5.38
  -5   1  21    5.46    3.75
  -3   1  21   31.84    4.77
  -1   1  21   81.96    6.12
   1   1  21  135.79    8.83
 -22   2  21  206.98   16.26
 -20   2  21  108.90   11.45
 -18   2  21   58.77    8.83
 -16   2  21    2.28    4.40
 -14   2  21    8.51    5.33
 -12   2  21  157.58   13.29
 -10   2  21   93.09   10.57
  -8   2  21   26.43    5.75
  -6   2  21   -1.65    3.87
  -4   2  21   61.93    5.83
  -2   2  21   82.90    6.88
   0   2  21  175.01    9.21
   2   2  21  101.98    9.28
 -23   3  21   86.30   15.19
 -21   3  21   77.80   10.38
 -19   3  21   56.42    8.99
 -17   3  21    6.48    5.39
 -15   3  21   45.31    7.84
 -13   3  21   16.82    5.84
 -11   3  21   -1.00    4.50
  -9   3  21    3.30    4.08
  -7   3  21    6.70    4.49
  -5   3  21   38.38    5.40
  -3   3  21   47.46    5.68
  -1   3  21    9.92    4.43
   1   3  21   40.74    6.61
 -22   4  21   -4.63    6.79
 -20   4  21    0.65    5.50
 -18   4  21   19.70    6.52
 -16   4  21   40.68    7.99
 -14   4  21   32.70    7.40
 -12   4  21  101.17   10.84
 -10   4  21  154.69   11.53
  -8   4  21  106.48    9.76
  -6   4  21   40.94    5.56
  -4   4  21    8.07    4.21
  -2   4  21    4.00    3.78
   0   4  21    3.60    4.71
 -21   5  21   29.11   10.57
 -19   5  21   -2.98    6.67
 -17   5  21   40.65    7.94
 -15   5  21   47.09    8.29
 -13   5  21  243.92   16.48
 -11   5  21  290.53   14.39
  -9   5  21  281.75   14.77
  -7   5  21  108.30    8.14
  -5   5  21   16.53    4.78
  -3   5  21   15.48    4.80
  -1   5  21   17.50    5.56
 -18   6  21    4.34    7.68
 -16   6  21   39.05   10.89
 -14   6  21   51.89    8.49
 -12   6  21  201.79   13.20
 -10   6  21  141.04   11.25
  -8   6  21   65.22    6.58
  -6   6  21  112.33    8.76
  -4   6  21    3.14    4.48
 -15   7  21   -2.71    7.11
 -13   7  21   17.60    7.11
 -11   7  21    8.35    5.76
  -9   7  21    1.93    4.04
  -7   7  21    5.22    4.47
 -22   0  22   48.75   17.10
 -20   0  22  117.30   24.45
 -18   0  22  246.92   24.54
 -16   0  22  455.59   27.79
 -14   0  22   92.78   15.28
 -12   0  22  231.04   23.17
 -10   0  22    2.98    7.23
  -8   0  22    0.41    7.06
  -6   0  22    7.11    5.97
  -4   0  22    8.26    6.53
  -2   0  22    0.63    6.06
 -21   1  22   67.20   13.48
 -19   1  22   47.10    9.48
 -17   1  22  248.76   17.05
 -15   1  22   73.51    9.90
 -13   1  22  161.50   13.78
 -11   1  22    1.47    5.15
  -9   1  22   20.19    6.45
  -7   1  22    7.97    4.84
  -5   1  22    0.69    4.11
  -3   1  22    4.37    4.61
  -1   1  22    3.16    5.07
 -20   2  22    1.57    7.79
 -18   2  22   -1.03    4.76
 -16   2  22    4.72    5.30
 -14   2  22   -0.19    5.02
 -12   2  22    5.43    5.51
 -10   2  22   36.69    7.99
  -8   2  22   40.13    7.01
  -6   2  22   81.26    8.80
  -4   2  22   41.05    5.22
  -2   2  22   23.09    5.22
 -19   3  22    4.18    7.88
 -17   3  22   77.04   10.68
 -15   3  22  141.23   13.01
 -13   3  22    1.78    5.15
 -11   3  22   10.37    6.02
  -9   3  22   30.75    6.43
  -7   3  22   94.52    9.60
  -5   3  22  194.91   13.12
  -3   3  22  119.89    8.38
 -18   4  22   44.82   12.27
 -16   4  22  153.94   18.59
 -14   4  22   28.16    7.28
 -12   4  22    1.92    5.08
 -10   4  22    6.38    4.97
  -8   4  22   34.67    6.63
  -6   4  22   54.84    6.16
  -4   4  22  111.24    8.68
 -17   5  22   11.77    8.53
 -15   5  22   -0.86    7.04
 -13   5  22    3.23    6.66
 -11   5  22   -3.69    4.74
  -9   5  22    0.78    4.71
  -7   5  22    7.75    5.28
 -14   6  22   28.43   15.57
 -12   6  22    5.63    6.28
 -10   6  22   -0.10    6.13
 -18   0  23   -0.84   10.32
 -16   0  23    1.37   10.27
 -14   0  23    3.24   11.74
 -12   0  23    6.48    7.69
 -10   0  23    2.63    7.38
  -8   0  23   -1.54    7.66
  -6   0  23    3.80    6.48
 -17   1  23   19.67    9.76
 -15   1  23   -3.40    6.85
 -13   1  23   17.58    8.65
 -11   1  23   21.82    7.17
  -9   1  23   65.23    9.63
  -7   1  23   39.14    7.27
 -16   2  23   12.12    8.89
 -14   2  23    1.77    7.53
 -12   2  23   29.74    9.35
 -10   2  23  119.38   12.63
  -8   2  23   47.12    7.59
 -15   3  23    8.62    8.68
 -13   3  23    3.85    8.12
 -11   3  23   -7.73    6.75
  -9   3  23   27.52    7.38

_computing_structure_solution     'SHELXT 2014/4 (Sheldrick, 2014)'
;
_shelx_hkl_checksum                1030
_olex2_submission_special_instructions  'No special instructions were received'
