# Supplementary material
Source: publisher figshare collection journal article supplement (https://acs.figshare.com/ndownloader/files/22494656)
Supplement: Supplementary file 1 [file 22494656 › CIF/1V.cif]

data_1v
_audit_creation_date               2019-03-30
_audit_creation_method
;
Olex2 1.2
(compiled 2018.05.29 svn.r3508 for OlexSys, GUI svn.r5506)
;
_shelx_SHELXL_version_number       '2016/6'
_audit_contact_author_address      ?
_audit_contact_author_email        ?
_audit_contact_author_name         ''
_audit_contact_author_phone        ?
_publ_contact_author_id_orcid      ?
_publ_section_references
;
Dolomanov, O.V., Bourhis, L.J., Gildea, R.J, Howard, J.A.K. & Puschmann, H.
 (2009), J. Appl. Cryst. 42, 339-341.

Sheldrick, G.M. (2008). Acta Cryst. A64, 112-122.
;
_chemical_name_common              ?
_chemical_name_systematic          ?
_chemical_formula_moiety           'C22 H17 Cu I N3 O, C6 H4 Cl1.5'
_chemical_formula_sum              'C28 H21 Cl1.50 Cu I N3 O'
_chemical_formula_weight           659.09
_chemical_melting_point            ?
loop_
  _atom_type_symbol
  _atom_type_description
  _atom_type_scat_dispersion_real
  _atom_type_scat_dispersion_imag
  _atom_type_scat_source
 'C' 'C' 0.0033 0.0016 'International Tables Vol C Tables 4.2.6.8 and 6.1.1.4'
 'H' 'H' 0.0000 0.0000 'International Tables Vol C Tables 4.2.6.8 and 6.1.1.4'
 'Cl' 'Cl' 0.1484 0.1585 'International Tables Vol C Tables 4.2.6.8 and 6.1.1.4'
 'Cu' 'Cu' 0.3201 1.2651 'International Tables Vol C Tables 4.2.6.8 and 6.1.1.4'
 'I' 'I' -0.4742 1.8119 'International Tables Vol C Tables 4.2.6.8 and 6.1.1.4'
 'N' 'N' 0.0061 0.0033 'International Tables Vol C Tables 4.2.6.8 and 6.1.1.4'
 'O' 'O' 0.0106 0.0060 'International Tables Vol C Tables 4.2.6.8 and 6.1.1.4'

_shelx_space_group_comment
;
The symmetry employed for this shelxl refinement is uniquely defined
by the following loop, which should always be used as a source of
symmetry information in preference to the above space-group names.
They are only intended as comments.
;
_space_group_crystal_system        'monoclinic'
_space_group_IT_number             15
_space_group_name_H-M_alt          'C 1 2/c 1'
_space_group_name_Hall             '-C 2yc'
loop_
  _space_group_symop_operation_xyz
 'x, y, z'
 '-x, y, -z+1/2'
 'x+1/2, y+1/2, z'
 '-x+1/2, y+1/2, -z+1/2'
 '-x, -y, -z'
 'x, -y, z-1/2'
 '-x+1/2, -y+1/2, -z'
 'x+1/2, -y+1/2, z-1/2'

_cell_length_a                     23.9180(9)
_cell_length_b                     12.7420(5)
_cell_length_c                     17.8041(7)
_cell_angle_alpha                  90
_cell_angle_beta                   112.848(2)
_cell_angle_gamma                  90
_cell_volume                       5000.3(3)
_cell_formula_units_Z              8
_cell_measurement_reflns_used      9887
_cell_measurement_temperature      100
_cell_measurement_theta_max        25.41
_cell_measurement_theta_min        2.42
_shelx_estimated_absorpt_T_max     ?
_shelx_estimated_absorpt_T_min     ?
_exptl_absorpt_coefficient_mu      2.296
_exptl_absorpt_correction_T_max    0.7452
_exptl_absorpt_correction_T_min    0.5188
_exptl_absorpt_correction_type     multi-scan
_exptl_absorpt_process_details    
 'SADABS-2014/4 (Bruker,2014/4) was used for absorption correction. wR2(int) was 0.1712 before and 0.0520 after correction. The Ratio of minimum to maximum transmission is 0.6962. The \l/2 correction factor is 0.00150.'
_exptl_absorpt_special_details     ?
_exptl_crystal_colour              'clear light yellow'
_exptl_crystal_colour_lustre       clear
_exptl_crystal_colour_modifier     light
_exptl_crystal_colour_primary      yellow
_exptl_crystal_density_diffrn      1.751
_exptl_crystal_density_meas        ?
_exptl_crystal_density_method      ?
_exptl_crystal_description         block
_exptl_crystal_F_000               2604
_exptl_crystal_size_max            0.45
_exptl_crystal_size_mid            0.35
_exptl_crystal_size_min            0.3
_exptl_transmission_factor_max     ?
_exptl_transmission_factor_min     ?
_diffrn_reflns_av_R_equivalents    0.0381
_diffrn_reflns_av_unetI/netI       0.0311
_diffrn_reflns_Laue_measured_fraction_full  0.999
_diffrn_reflns_Laue_measured_fraction_max  0.989
_diffrn_reflns_limit_h_max         28
_diffrn_reflns_limit_h_min         -27
_diffrn_reflns_limit_k_max         15
_diffrn_reflns_limit_k_min         -15
_diffrn_reflns_limit_l_max         21
_diffrn_reflns_limit_l_min         -21
_diffrn_reflns_number              22626
_diffrn_reflns_point_group_measured_fraction_full  0.999
_diffrn_reflns_point_group_measured_fraction_max  0.989
_diffrn_reflns_theta_full          25.242
_diffrn_reflns_theta_max           25.579
_diffrn_reflns_theta_min           1.846
_diffrn_ambient_temperature        100.0
_diffrn_detector_area_resol_mean   ?
_diffrn_measured_fraction_theta_full  0.999
_diffrn_measured_fraction_theta_max  0.989
_diffrn_measurement_device_type    'Bruker APEX-II CCD'
_diffrn_measurement_method         '\f and \w scans'
_diffrn_radiation_type             MoK\a
_diffrn_radiation_wavelength       0.71073
_diffrn_source                     ?
_reflns_Friedel_coverage           0.000
_reflns_Friedel_fraction_full      .
_reflns_Friedel_fraction_max       .
_reflns_number_gt                  3646
_reflns_number_total               4660
_reflns_special_details
;
 Reflections were merged by SHELXL according to the crystal
 class for the calculation of statistics and refinement.
 
 _reflns_Friedel_fraction is defined as the number of unique
 Friedel pairs measured divided by the number that would be
 possible theoretically, ignoring centric projections and
 systematic absences.
;
_reflns_threshold_expression       'I > 2\s(I)'
_computing_cell_refinement         'SAINT v8.34A (Bruker, 2013)'
_computing_data_collection         ?
_computing_data_reduction          'SAINT v8.34A (Bruker, 2013)'
_computing_molecular_graphics      'Olex2 (Dolomanov et al., 2009)'
_computing_publication_material    'Olex2 (Dolomanov et al., 2009)'
_computing_structure_refinement    'XL (Sheldrick, 2008)'
_computing_structure_solution      'ShelXS (Sheldrick, 2008)'
_refine_diff_density_max           2.220
_refine_diff_density_min           -2.520
_refine_diff_density_rms           0.236
_refine_ls_extinction_coef         .
_refine_ls_extinction_method       none
_refine_ls_goodness_of_fit_ref     1.035
_refine_ls_hydrogen_treatment      constr
_refine_ls_matrix_type             full
_refine_ls_number_parameters       287
_refine_ls_number_reflns           4660
_refine_ls_number_restraints       21
_refine_ls_R_factor_all            0.1017
_refine_ls_R_factor_gt             0.0812
_refine_ls_restrained_S_all        1.034
_refine_ls_shift/su_max            0.002
_refine_ls_shift/su_mean           0.000
_refine_ls_structure_factor_coef   Fsqd
_refine_ls_weighting_details      
 'w=1/[\s^2^(Fo^2^)+(0.1501P)^2^+101.0342P] where P=(Fo^2^+2Fc^2^)/3'
_refine_ls_weighting_scheme        calc
_refine_ls_wR_factor_gt            0.2275
_refine_ls_wR_factor_ref           0.2560
_refine_special_details            ?
_olex2_refinement_description
;
1. Fixed Uiso
 At 1.2 times of:
  All C(H) groups
 At 1.5 times of:
  All C(H,H,H) groups
2. Rigid bond restraints
 C29, C28, C27, C26, C25, C24
 with sigma for 1-2 distances of 0.01 and sigma for 1-3 distances of 0.01
3. Uiso/Uaniso restraints and constraints
C29 \\sim Cl2: within 2A with sigma of 0.04 and sigma for terminal atoms of 0.08
Uanis(C26) = Uanis(C24)
Uanis(C24) = Uanis(C25)
Uanis(C28) = Uanis(C27)
4. Rigid body (RIGU) restrains
 Cl2, C29
 with sigma for 1-2 distances of 0.004 and sigma for 1-3 distances of 0.004
5.a Aromatic/amide H refined with riding coordinates:
 C9(H9), C7(H7), C12(H12), C4(H4), C5(H5), C16(H16), C15(H15), C13(H13),
 C20(H20), C21(H21), C2(H2), C1(H1), C18(H18), C19(H19), C28(H28), C27(H27),
 C26(H26), C25(H25)
5.b Fitted hexagon refined as free rotating group:
 C28(C27,C26,C25,C24,C29)
5.c Idealised Me refined as rotating group:
 C23(H23A,H23B,H23C)
;
_atom_sites_solution_hydrogens     geom
_atom_sites_solution_primary       direct
_atom_sites_solution_secondary     ?
loop_
  _atom_site_label
  _atom_site_type_symbol
  _atom_site_fract_x
  _atom_site_fract_y
  _atom_site_fract_z
  _atom_site_U_iso_or_equiv
  _atom_site_adp_type
  _atom_site_occupancy
  _atom_site_site_symmetry_order
  _atom_site_calc_flag
  _atom_site_refinement_flags_posn
  _atom_site_refinement_flags_adp
  _atom_site_refinement_flags_occupancy
  _atom_site_disorder_assembly
  _atom_site_disorder_group
 I1 I 1.04395(3) 0.64266(5) 0.96520(5) 0.0516(3) Uani 1 1 d . . . . .
 Cu02 Cu 0.99889(5) 0.45095(9) 0.93479(7) 0.0403(4) Uani 1 1 d . . . . .
 N003 N 0.7484(3) 0.3865(6) 0.5661(5) 0.0369(16) Uani 1 1 d . . . . .
 N004 N 0.5701(3) 0.1432(6) 0.4464(5) 0.0404(17) Uani 1 1 d . . . . .
 N14 N 0.9305(3) 0.4526(6) 0.8232(5) 0.0450(19) Uani 1 1 d . . . . .
 O1 O 0.7057(5) 0.8718(6) 0.2258(5) 0.065(2) Uani 1 1 d . . . . .
 C9 C 0.7819(4) 0.5500(6) 0.5338(6) 0.0350(18) Uani 1 1 d . . . . .
 H9 H 0.810085 0.606285 0.551472 0.042 Uiso 1 1 calc R . . . .
 C11 C 0.8381(4) 0.4600(6) 0.6674(6) 0.0346(18) Uani 1 1 d . . . . .
 C8 C 0.7350(4) 0.5537(6) 0.4572(6) 0.0364(19) Uani 1 1 d . . . . .
 C10 C 0.7878(4) 0.4651(6) 0.5844(6) 0.0352(18) Uani 1 1 d . . . . .
 C7 C 0.6951(4) 0.4679(7) 0.4374(6) 0.0380(19) Uani 1 1 d . . . . .
 H7 H 0.662753 0.464987 0.385331 0.046 Uiso 1 1 calc R . . . .
 C6 C 0.7022(4) 0.3884(7) 0.4921(6) 0.0376(19) Uani 1 1 d . . . . .
 C12 C 0.8880(4) 0.5262(8) 0.6896(6) 0.046(2) Uani 1 1 d . . . . .
 H12 H 0.891764 0.574994 0.651500 0.055 Uiso 1 1 calc R . . . .
 C4 C 0.6609(4) 0.2281(8) 0.5339(6) 0.045(2) Uani 1 1 d . . . . .
 H4 H 0.693635 0.229795 0.585664 0.054 Uiso 1 1 calc R . . . .
 C5 C 0.6167(4) 0.1542(7) 0.5181(6) 0.043(2) Uani 1 1 d . . . . .
 H5 H 0.619157 0.107417 0.560819 0.052 Uiso 1 1 calc R . . . .
 C16 C 0.8368(4) 0.3899(7) 0.7255(6) 0.042(2) Uani 1 1 d . . . . .
 H16 H 0.803807 0.342370 0.712619 0.051 Uiso 1 1 calc R . . . .
 C17 C 0.7275(4) 0.6390(6) 0.3997(6) 0.0380(19) Uani 1 1 d . . . . .
 C3 C 0.6585(4) 0.3003(7) 0.4756(6) 0.0375(19) Uani 1 1 d . . . . .
 C15 C 0.8827(4) 0.3873(7) 0.8019(6) 0.044(2) Uani 1 1 d . . . . .
 H15 H 0.880441 0.338007 0.840608 0.052 Uiso 1 1 calc R . . . .
 C22 C 0.7162(6) 0.7984(7) 0.2841(6) 0.051(3) Uani 1 1 d . . . . .
 C13 C 0.9315(4) 0.5209(8) 0.7664(7) 0.047(2) Uani 1 1 d . . . . .
 H13 H 0.964683 0.568322 0.780588 0.057 Uiso 1 1 calc R . . . .
 C20 C 0.7773(4) 0.6995(7) 0.4027(7) 0.044(2) Uani 1 1 d . . . . .
 H20 H 0.815900 0.686347 0.444766 0.053 Uiso 1 1 calc R . . . .
 C21 C 0.7721(5) 0.7774(8) 0.3466(7) 0.050(2) Uani 1 1 d . . . . .
 H21 H 0.806838 0.816957 0.350508 0.060 Uiso 1 1 calc R . . . .
 C2 C 0.6114(5) 0.2874(8) 0.3994(6) 0.052(3) Uani 1 1 d . . . . .
 H2 H 0.608046 0.333602 0.355942 0.062 Uiso 1 1 calc R . . . .
 C1 C 0.5698(5) 0.2079(8) 0.3872(6) 0.054(3) Uani 1 1 d . . . . .
 H1 H 0.539456 0.198578 0.334125 0.065 Uiso 1 1 calc R . . . .
 C18 C 0.6715(5) 0.6630(8) 0.3359(7) 0.050(2) Uani 1 1 d . . . . .
 H18 H 0.636654 0.623523 0.331194 0.060 Uiso 1 1 calc R . . . .
 C19 C 0.6658(6) 0.7406(8) 0.2808(7) 0.055(3) Uani 1 1 d . . . . .
 H19 H 0.627032 0.755585 0.239791 0.066 Uiso 1 1 calc R . . . .
 C23 C 0.7556(7) 0.9365(10) 0.2318(10) 0.080(4) Uani 1 1 d . . . . .
 H23A H 0.741222 0.995524 0.193913 0.120 Uiso 1 1 calc GR . . . .
 H23B H 0.784960 0.895294 0.218139 0.120 Uiso 1 1 calc GR . . . .
 H23C H 0.775094 0.963153 0.287637 0.120 Uiso 1 1 calc GR . . . .
 C28 C 0.5635(13) 0.619(2) 0.673(2) 0.242(13) Uani 1 1 d . U . . .
 H28 H 0.560372 0.684038 0.697536 0.290 Uiso 1 1 calc R . . . .
 C27 C 0.5836(13) 0.6178(19) 0.609(2) 0.242(13) Uani 1 1 d G U . . .
 H27 H 0.594228 0.681524 0.590642 0.290 Uiso 1 1 calc R . . . .
 C26 C 0.5882(13) 0.523(3) 0.5736(16) 0.264(12) Uani 1 1 d G U . . .
 H26 H 0.601953 0.522056 0.530195 0.317 Uiso 1 1 calc R . . . .
 C25 C 0.5727(15) 0.4298(19) 0.601(2) 0.264(12) Uani 1 1 d G U . . .
 H25 H 0.575822 0.365100 0.576642 0.317 Uiso 1 1 calc R . . . .
 C24 C 0.5526(15) 0.431(2) 0.665(2) 0.264(12) Uani 1 1 d G U . . .
 C29 C 0.5480(13) 0.526(3) 0.7006(16) 0.244(12) Uani 1 1 d G U . . .
 Cl2 Cl 0.500000 0.5675(14) 0.750000 0.226(6) Uani 1 2 d S TU P . .
 Cl1 Cl 0.5046(12) 0.3474(14) 0.7085(13) 0.365(12) Uiso 1 1 d . . . . .

loop_
  _atom_site_aniso_label
  _atom_site_aniso_U_11
  _atom_site_aniso_U_22
  _atom_site_aniso_U_33
  _atom_site_aniso_U_23
  _atom_site_aniso_U_13
  _atom_site_aniso_U_12
 I1 0.0444(4) 0.0388(4) 0.0825(6) -0.0199(3) 0.0366(4) -0.0130(3)
 Cu02 0.0265(6) 0.0330(6) 0.0576(7) -0.0081(5) 0.0120(5) 0.0033(4)
 N003 0.028(4) 0.034(4) 0.051(4) 0.002(3) 0.017(3) 0.000(3)
 N004 0.030(4) 0.042(4) 0.049(4) 0.007(3) 0.014(3) 0.002(3)
 N14 0.026(4) 0.032(4) 0.071(5) 0.002(4) 0.012(4) -0.005(3)
 O1 0.111(7) 0.040(4) 0.055(4) 0.011(3) 0.045(5) 0.008(4)
 C9 0.029(4) 0.026(4) 0.052(5) -0.003(4) 0.018(4) -0.001(3)
 C11 0.027(4) 0.025(4) 0.056(5) 0.001(4) 0.021(4) 0.002(3)
 C8 0.039(5) 0.025(4) 0.049(5) 0.000(3) 0.021(4) 0.003(3)
 C10 0.028(4) 0.026(4) 0.053(5) 0.001(4) 0.017(4) 0.002(3)
 C7 0.036(4) 0.030(4) 0.046(5) 0.004(4) 0.014(4) -0.003(4)
 C6 0.032(4) 0.032(4) 0.052(5) 0.003(4) 0.020(4) -0.003(4)
 C12 0.032(5) 0.043(5) 0.063(6) 0.010(4) 0.020(4) -0.008(4)
 C4 0.027(4) 0.045(5) 0.053(5) 0.013(4) 0.005(4) -0.008(4)
 C5 0.031(4) 0.043(5) 0.051(5) 0.014(4) 0.010(4) -0.007(4)
 C16 0.034(5) 0.030(4) 0.058(6) 0.004(4) 0.012(4) -0.007(4)
 C17 0.042(5) 0.025(4) 0.052(5) -0.001(4) 0.024(4) 0.005(3)
 C3 0.033(4) 0.034(5) 0.049(5) 0.002(4) 0.020(4) -0.004(4)
 C15 0.042(5) 0.030(4) 0.053(5) 0.007(4) 0.013(4) -0.007(4)
 C22 0.080(8) 0.026(5) 0.058(6) -0.002(4) 0.040(6) 0.008(5)
 C13 0.023(4) 0.044(5) 0.071(6) 0.003(5) 0.014(4) -0.008(4)
 C20 0.041(5) 0.027(5) 0.072(6) 0.004(4) 0.031(5) 0.007(4)
 C21 0.065(7) 0.029(5) 0.075(7) 0.001(4) 0.049(6) 0.005(4)
 C2 0.060(6) 0.040(5) 0.046(5) 0.009(4) 0.010(5) -0.019(5)
 C1 0.052(6) 0.048(6) 0.047(5) 0.012(4) 0.003(4) -0.018(5)
 C18 0.049(6) 0.035(5) 0.061(6) 0.002(4) 0.015(5) -0.005(4)
 C19 0.063(7) 0.036(5) 0.057(6) 0.003(4) 0.014(5) -0.005(5)
 C23 0.116(11) 0.058(8) 0.105(10) 0.039(7) 0.084(10) 0.030(8)
 C28 0.23(3) 0.195(17) 0.33(4) -0.007(19) 0.14(3) 0.10(2)
 C27 0.23(3) 0.195(17) 0.33(4) -0.007(19) 0.14(3) 0.10(2)
 C26 0.34(3) 0.214(19) 0.23(3) -0.07(2) 0.11(2) -0.02(3)
 C25 0.34(3) 0.214(19) 0.23(3) -0.07(2) 0.11(2) -0.02(3)
 C24 0.34(3) 0.214(19) 0.23(3) -0.07(2) 0.11(2) -0.02(3)
 C29 0.30(3) 0.21(2) 0.19(2) -0.028(19) 0.062(19) 0.05(2)
 Cl2 0.203(14) 0.237(16) 0.185(12) 0.000 0.018(9) 0.000

_geom_special_details
;
 All esds (except the esd in the dihedral angle between two l.s. planes)
 are estimated using the full covariance matrix.  The cell esds are taken
 into account individually in the estimation of esds in distances, angles
 and torsion angles; correlations between esds in cell parameters are only
 used when they are defined by crystal symmetry.  An approximate (isotropic)
 treatment of cell esds is used for estimating esds involving l.s. planes.
;
loop_
  _geom_bond_atom_site_label_1
  _geom_bond_atom_site_label_2
  _geom_bond_distance
  _geom_bond_site_symmetry_2
  _geom_bond_publ_flag
 I1 Cu02 2.6399(13) . ?
 I1 Cu02 2.6570(14) 5_767 ?
 Cu02 Cu02 2.619(2) 5_767 ?
 Cu02 N004 2.028(8) 8_556 ?
 Cu02 N14 2.025(8) . ?
 N003 C10 1.326(11) . ?
 N003 C6 1.352(12) . ?
 N004 C5 1.337(12) . ?
 N004 C1 1.335(12) . ?
 N14 C15 1.344(12) . ?
 N14 C13 1.342(13) . ?
 O1 C22 1.346(12) . ?
 O1 C23 1.420(17) . ?
 C9 H9 0.9500 . ?
 C9 C8 1.391(13) . ?
 C9 C10 1.379(12) . ?
 C11 C10 1.501(13) . ?
 C11 C12 1.389(12) . ?
 C11 C16 1.376(13) . ?
 C8 C7 1.403(12) . ?
 C8 C17 1.455(12) . ?
 C7 H7 0.9500 . ?
 C7 C6 1.371(13) . ?
 C6 C3 1.482(12) . ?
 C12 H12 0.9500 . ?
 C12 C13 1.360(14) . ?
 C4 H4 0.9500 . ?
 C4 C5 1.361(13) . ?
 C4 C3 1.371(13) . ?
 C5 H5 0.9500 . ?
 C16 H16 0.9500 . ?
 C16 C15 1.376(14) . ?
 C17 C20 1.403(13) . ?
 C17 C18 1.412(14) . ?
 C3 C2 1.396(14) . ?
 C15 H15 0.9500 . ?
 C22 C21 1.393(16) . ?
 C22 C19 1.396(16) . ?
 C13 H13 0.9500 . ?
 C20 H20 0.9500 . ?
 C20 C21 1.381(14) . ?
 C21 H21 0.9500 . ?
 C2 H2 0.9500 . ?
 C2 C1 1.377(14) . ?
 C1 H1 0.9500 . ?
 C18 H18 0.9500 . ?
 C18 C19 1.361(15) . ?
 C19 H19 0.9500 . ?
 C23 H23A 0.9800 . ?
 C23 H23B 0.9800 . ?
 C23 H23C 0.9800 . ?
 C28 H28 0.9500 . ?
 C28 C27 1.3900 . ?
 C28 C29 1.3900 . ?
 C27 H27 0.9500 . ?
 C27 C26 1.3900 . ?
 C26 H26 0.9500 . ?
 C26 C25 1.3900 . ?
 C25 H25 0.9500 . ?
 C25 C24 1.3900 . ?
 C24 C29 1.3900 . ?
 C24 Cl1 1.94(3) . ?
 C29 Cl2 1.78(3) . ?
 Cl1 Cl1 1.58(4) 2_656 ?

loop_
  _geom_angle_atom_site_label_1
  _geom_angle_atom_site_label_2
  _geom_angle_atom_site_label_3
  _geom_angle
  _geom_angle_site_symmetry_1
  _geom_angle_site_symmetry_3
  _geom_angle_publ_flag
 Cu02 I1 Cu02 59.28(4) . 5_767 ?
 I1 Cu02 I1 120.72(4) . 5_767 ?
 Cu02 Cu02 I1 60.69(4) 5_767 . ?
 Cu02 Cu02 I1 60.04(5) 5_767 5_767 ?
 N004 Cu02 I1 105.4(2) 8_556 . ?
 N004 Cu02 I1 101.2(2) 8_556 5_767 ?
 N004 Cu02 Cu02 117.7(2) 8_556 5_767 ?
 N14 Cu02 I1 106.7(2) . 5_767 ?
 N14 Cu02 I1 107.5(2) . . ?
 N14 Cu02 Cu02 126.5(2) . 5_767 ?
 N14 Cu02 N004 115.7(3) . 8_556 ?
 C10 N003 C6 117.4(8) . . ?
 C5 N004 Cu02 121.0(6) . 8_455 ?
 C1 N004 Cu02 122.6(6) . 8_455 ?
 C1 N004 C5 115.8(8) . . ?
 C15 N14 Cu02 123.1(7) . . ?
 C13 N14 Cu02 120.2(6) . . ?
 C13 N14 C15 116.8(8) . . ?
 C22 O1 C23 116.4(10) . . ?
 C8 C9 H9 119.8 . . ?
 C10 C9 H9 119.8 . . ?
 C10 C9 C8 120.4(8) . . ?
 C12 C11 C10 121.7(8) . . ?
 C16 C11 C10 121.7(8) . . ?
 C16 C11 C12 116.6(9) . . ?
 C9 C8 C7 115.5(8) . . ?
 C9 C8 C17 123.2(8) . . ?
 C7 C8 C17 121.3(8) . . ?
 N003 C10 C9 123.3(8) . . ?
 N003 C10 C11 115.5(7) . . ?
 C9 C10 C11 121.1(8) . . ?
 C8 C7 H7 119.5 . . ?
 C6 C7 C8 120.9(8) . . ?
 C6 C7 H7 119.5 . . ?
 N003 C6 C7 122.3(8) . . ?
 N003 C6 C3 115.3(8) . . ?
 C7 C6 C3 122.4(8) . . ?
 C11 C12 H12 120.2 . . ?
 C13 C12 C11 119.6(9) . . ?
 C13 C12 H12 120.2 . . ?
 C5 C4 H4 119.8 . . ?
 C5 C4 C3 120.5(9) . . ?
 C3 C4 H4 119.8 . . ?
 N004 C5 C4 124.2(9) . . ?
 N004 C5 H5 117.9 . . ?
 C4 C5 H5 117.9 . . ?
 C11 C16 H16 119.4 . . ?
 C11 C16 C15 121.1(8) . . ?
 C15 C16 H16 119.4 . . ?
 C20 C17 C8 120.8(9) . . ?
 C20 C17 C18 115.9(9) . . ?
 C18 C17 C8 123.2(9) . . ?
 C4 C3 C6 122.5(8) . . ?
 C4 C3 C2 116.0(8) . . ?
 C2 C3 C6 121.5(8) . . ?
 N14 C15 C16 121.9(9) . . ?
 N14 C15 H15 119.0 . . ?
 C16 C15 H15 119.0 . . ?
 O1 C22 C21 125.7(10) . . ?
 O1 C22 C19 115.7(11) . . ?
 C21 C22 C19 118.6(9) . . ?
 N14 C13 C12 124.0(8) . . ?
 N14 C13 H13 118.0 . . ?
 C12 C13 H13 118.0 . . ?
 C17 C20 H20 119.0 . . ?
 C21 C20 C17 122.1(10) . . ?
 C21 C20 H20 119.0 . . ?
 C22 C21 H21 119.8 . . ?
 C20 C21 C22 120.4(10) . . ?
 C20 C21 H21 119.8 . . ?
 C3 C2 H2 120.0 . . ?
 C1 C2 C3 120.0(9) . . ?
 C1 C2 H2 120.0 . . ?
 N004 C1 C2 123.2(9) . . ?
 N004 C1 H1 118.4 . . ?
 C2 C1 H1 118.4 . . ?
 C17 C18 H18 118.8 . . ?
 C19 C18 C17 122.5(10) . . ?
 C19 C18 H18 118.8 . . ?
 C22 C19 H19 119.7 . . ?
 C18 C19 C22 120.6(10) . . ?
 C18 C19 H19 119.7 . . ?
 O1 C23 H23A 109.5 . . ?
 O1 C23 H23B 109.5 . . ?
 O1 C23 H23C 109.5 . . ?
 H23A C23 H23B 109.5 . . ?
 H23A C23 H23C 109.5 . . ?
 H23B C23 H23C 109.5 . . ?
 C27 C28 H28 120.0 . . ?
 C27 C28 C29 120.0 . . ?
 C29 C28 H28 120.0 . . ?
 C28 C27 H27 120.0 . . ?
 C26 C27 C28 120.0 . . ?
 C26 C27 H27 120.0 . . ?
 C27 C26 H26 120.0 . . ?
 C27 C26 C25 120.0 . . ?
 C25 C26 H26 120.0 . . ?
 C26 C25 H25 120.0 . . ?
 C24 C25 C26 120.0 . . ?
 C24 C25 H25 120.0 . . ?
 C25 C24 C29 120.0 . . ?
 C25 C24 Cl1 140(2) . . ?
 C29 C24 Cl1 97(2) . . ?
 C28 C29 Cl2 103(2) . . ?
 C24 C29 C28 120.0 . . ?
 C24 C29 Cl2 132(2) . . ?
 C29 Cl2 C29 145(4) 2_656 . ?
 Cl1 Cl1 C24 134(2) 2_656 . ?

_shelx_res_file
;
TITL 1v.res in C2/c
    1v.res
    created by SHELXL-2016/6 at 15:14:45 on 30-Mar-2019
REM Old TITL ty3 in C2/c
REM SHELXT solution in C2/c
REM R1 0.221, Rweak 0.006, Alpha 0.033, Orientation as input
REM Formula found by SHELXT: C47 N10 Cu2 I2
CELL 0.71073 23.918 12.742 17.8041 90 112.848 90
ZERR 8 0.0009 0.0005 0.0007 0 0.002 0
LATT 7
SYMM -X,+Y,0.5-Z
SFAC C H Cl Cu I N O
UNIT 224 168 12 8 8 24 8
DELU C29 C28 C27 C26 C25 C24
SIMU C29 Cl2
RIGU Cl2 C29
EADP C26 C24
EADP C24 C25
EADP C28 C27

L.S. 5
PLAN  10
TEMP -173.15
htab
BOND $H
fmap 2
acta
REM <olex2.extras>
REM <HklSrc "%.\\1v.hkl">
REM </olex2.extras>

WGHT    0.150100  101.034195
FVAR       0.17164
I1    5    1.043951    0.642660    0.965203    11.00000    0.04439    0.03879 =
         0.08254   -0.01992    0.03657   -0.01300
CU02  4    0.998891    0.450947    0.934787    11.00000    0.02646    0.03300 =
         0.05756   -0.00813    0.01197    0.00334
N003  6    0.748432    0.386469    0.566091    11.00000    0.02820    0.03385 =
         0.05058    0.00160    0.01736    0.00040
N004  6    0.570136    0.143155    0.446364    11.00000    0.02964    0.04160 =
         0.04890    0.00653    0.01419    0.00153
N14   6    0.930493    0.452623    0.823203    11.00000    0.02556    0.03221 =
         0.07085    0.00204    0.01183   -0.00538
O1    7    0.705681    0.871812    0.225780    11.00000    0.11145    0.04019 =
         0.05523    0.01063    0.04528    0.00796
C9    1    0.781926    0.549991    0.533832    11.00000    0.02874    0.02607 =
         0.05228   -0.00308    0.01810   -0.00127
AFIX  43
H9    2    0.810085    0.606285    0.551472    11.00000   -1.20000
AFIX   0
C11   1    0.838072    0.460019    0.667398    11.00000    0.02679    0.02530 =
         0.05627    0.00089    0.02107    0.00182
C8    1    0.735003    0.553712    0.457193    11.00000    0.03926    0.02512 =
         0.04861    0.00003    0.02107    0.00313
C10   1    0.787820    0.465051    0.584377    11.00000    0.02754    0.02587 =
         0.05335    0.00053    0.01707    0.00250
C7    1    0.695110    0.467950    0.437395    11.00000    0.03573    0.03008 =
         0.04638    0.00402    0.01400   -0.00265
AFIX  43
H7    2    0.662753    0.464987    0.385331    11.00000   -1.20000
AFIX   0
C6    1    0.702170    0.388351    0.492136    11.00000    0.03167    0.03198 =
         0.05205    0.00262    0.01956   -0.00292
C12   1    0.888014    0.526236    0.689643    11.00000    0.03241    0.04302 =
         0.06288    0.01023    0.02019   -0.00758
AFIX  43
H12   2    0.891764    0.574994    0.651500    11.00000   -1.20000
AFIX   0
C4    1    0.660911    0.228148    0.533888    11.00000    0.02720    0.04533 =
         0.05264    0.01273    0.00479   -0.00766
AFIX  43
H4    2    0.693635    0.229795    0.585664    11.00000   -1.20000
AFIX   0
C5    1    0.616730    0.154192    0.518111    11.00000    0.03086    0.04311 =
         0.05061    0.01369    0.00998   -0.00689
AFIX  43
H5    2    0.619157    0.107417    0.560819    11.00000   -1.20000
AFIX   0
C16   1    0.836841    0.389865    0.725459    11.00000    0.03428    0.02977 =
         0.05755    0.00363    0.01178   -0.00654
AFIX  43
H16   2    0.803807    0.342370    0.712619    11.00000   -1.20000
AFIX   0
C17   1    0.727467    0.639043    0.399749    11.00000    0.04218    0.02515 =
         0.05182   -0.00098    0.02397    0.00528
C3    1    0.658504    0.300292    0.475553    11.00000    0.03343    0.03386 =
         0.04870    0.00224    0.01975   -0.00437
C15   1    0.882669    0.387327    0.801850    11.00000    0.04193    0.03032 =
         0.05332    0.00668    0.01280   -0.00657
AFIX  43
H15   2    0.880441    0.338007    0.840608    11.00000   -1.20000
AFIX   0
C22   1    0.716230    0.798449    0.284099    11.00000    0.07999    0.02586 =
         0.05801   -0.00156    0.03977    0.00787
C13   1    0.931534    0.520866    0.766373    11.00000    0.02328    0.04376 =
         0.07082    0.00348    0.01382   -0.00787
AFIX  43
H13   2    0.964683    0.568322    0.780588    11.00000   -1.20000
AFIX   0
C20   1    0.777338    0.699484    0.402748    11.00000    0.04113    0.02716 =
         0.07226    0.00392    0.03095    0.00747
AFIX  43
H20   2    0.815900    0.686347    0.444766    11.00000   -1.20000
AFIX   0
C21   1    0.772126    0.777435    0.346561    11.00000    0.06496    0.02939 =
         0.07525    0.00056    0.04938    0.00456
AFIX  43
H21   2    0.806838    0.816957    0.350508    11.00000   -1.20000
AFIX   0
C2    1    0.611417    0.287443    0.399395    11.00000    0.05965    0.04043 =
         0.04625    0.00905    0.01011   -0.01904
AFIX  43
H2    2    0.608046    0.333602    0.355942    11.00000   -1.20000
AFIX   0
C1    1    0.569847    0.207884    0.387223    11.00000    0.05243    0.04760 =
         0.04661    0.01211    0.00298   -0.01772
AFIX  43
H1    2    0.539456    0.198578    0.334125    11.00000   -1.20000
AFIX   0
C18   1    0.671544    0.663025    0.335895    11.00000    0.04944    0.03459 =
         0.06072    0.00199    0.01522   -0.00513
AFIX  43
H18   2    0.636654    0.623523    0.331194    11.00000   -1.20000
AFIX   0
C19   1    0.665761    0.740637    0.280821    11.00000    0.06305    0.03588 =
         0.05701    0.00257    0.01378   -0.00502
AFIX  43
H19   2    0.627032    0.755585    0.239791    11.00000   -1.20000
AFIX   0
C23   1    0.755606    0.936451    0.231836    11.00000    0.11568    0.05783 =
         0.10536    0.03926    0.08447    0.02970
AFIX 137
H23A  2    0.741222    0.995524    0.193913    11.00000   -1.50000
H23B  2    0.784960    0.895294    0.218139    11.00000   -1.50000
H23C  2    0.775094    0.963153    0.287637    11.00000   -1.50000
AFIX  66

C28   1    0.563508    0.619296    0.672996    11.00000    0.23257    0.19489 =
         0.32629   -0.00749    0.14008    0.09773
AFIX  43
H28   2    0.560372    0.684038    0.697536    11.00000   -1.20000
AFIX  65
C27   1    0.583619    0.617803    0.609499    11.00000    0.23257    0.19489 =
         0.32629   -0.00749    0.14008    0.09773
AFIX  43
H27   2    0.594228    0.681524    0.590642    11.00000   -1.20000
AFIX  65
C26   1    0.588208    0.523076    0.573592    11.00000    0.34229    0.21382 =
         0.23404   -0.07097    0.11061   -0.01729
AFIX  43
H26   2    0.601953    0.522056    0.530195    11.00000   -1.20000
AFIX  65
C25   1    0.572685    0.429842    0.601182    11.00000    0.34229    0.21382 =
         0.23404   -0.07097    0.11061   -0.01729
AFIX  43
H25   2    0.575822    0.365100    0.576642    11.00000   -1.20000
AFIX  65
C24   1    0.552574    0.431334    0.664679    11.00000    0.34229    0.21382 =
         0.23404   -0.07097    0.11061   -0.01729
C29   1    0.547985    0.526060    0.700586    11.00000    0.30383    0.21360 =
         0.18549   -0.02807    0.06214    0.05244
AFIX   0
CL2   3    0.500000    0.567527    0.750000    10.50000    0.20259    0.23742 =
         0.18456    0.00000    0.01806    0.00000
CL1   3    0.504609    0.347438    0.708484    11.00000    0.36527
HKLF 4


REM  1v.res in C2/c
REM R1 =  0.0812 for    3646 Fo > 4sig(Fo)  and  0.1017 for all    4660 data
REM    287 parameters refined using     21 restraints

END

WGHT      0.1501    101.0139

REM Instructions for potential hydrogen bonds
EQIV $5 -x+2, y, -z+3/2
HTAB C12 I1_$5
EQIV $1 -x+2, -y+1, -z+2
HTAB C15 I1_$1
HTAB C13 I1
EQIV $6 -x+1, -y+1, -z+1
HTAB C2 Cl2_$6

REM Highest difference peak  2.220,  deepest hole -2.520,  1-sigma level  0.236
Q1    1   0.5895  0.5619  0.4963  11.00000  0.05    2.22
Q2    1   0.5784  0.6599  0.6911  11.00000  0.05    1.94
Q3    1   0.5712  0.5911  0.6991  11.00000  0.05    1.55
Q4    1   0.5917  0.0545  0.4971  11.00000  0.05    1.20
Q5    1   0.6024  0.4682  0.5857  11.00000  0.05    1.18
Q6    1   0.5703  0.5414  0.5858  11.00000  0.05    1.12
Q7    1   1.0524  0.6407  0.9165  11.00000  0.05    1.04
Q8    1   0.9090  0.5470  0.6341  11.00000  0.05    1.03
Q9    1   1.0092  0.6342  0.9317  11.00000  0.05    1.00
Q10   1   0.6323  0.1450  0.3920  11.00000  0.05    0.98
;
_shelx_res_checksum                83526
_shelx_hkl_file
;
   2   0   0 3231.28   59.29
   4   0   0 6755.82  119.89
  -4   0   0 6743.52  122.49
  -4   0   0 6290.27  119.69
  -6   0   0   39.80    3.00
   6   0   0   37.00    3.00
  -6   0   0   43.60    4.30
  -8   0   0  170.48    9.00
  -8   0   0  152.38    6.40
   8   0   0  148.49    6.40
 -10   0   0  115.89    6.40
 -10   0   0  123.49    8.90
  10   0   0  115.19    6.40
 -12   0   0   11.50    4.20
 -12   0   0    8.90    2.70
  12   0   0    9.50    3.10
 -14   0   0   58.79    8.10
  14   0   0   50.79    5.90
 -14   0   0   58.19    6.60
 -16   0   0  131.39   12.50
  16   0   0  141.89    9.90
 -16   0   0  123.89    9.80
 -18   0   0 1425.06   42.60
  18   0   0 1352.86   36.20
  20   0   0  577.34   22.10
  22   0   0  152.08   13.80
  24   0   0  682.93   27.20
  26   0   0  377.36   22.20
  -1  -1   0 4269.67   83.49
   1   1   0 4427.86   81.39
   1   1   0 4678.03   81.39
  -1   1   0 4633.84   82.29
  -1   1   0 4447.65   82.69
  -3  -1   0 1138.29   26.00
   3  -1   0 1125.49   22.60
  -3   1   0 1122.89   24.00
   3   1   0 1174.68   24.90
   3   1   0 1156.08   22.30
  -5  -1   0  587.64   17.30
   5  -1   0  536.45   13.00
  -5   1   0  554.94   14.40
   5   1   0  543.55   12.80
   7  -1   0  172.68    6.60
  -7  -1   0  164.98    9.60
  -7   1   0  175.48    7.70
   7   1   0  172.38    6.50
  -7   1   0  202.28    7.90
   9  -1   0   14.40    2.50
  -9  -1   0   17.60    4.10
  -9   1   0   12.60    2.80
  -9   1   0   12.00    2.50
   9   1   0   17.90    2.70
 -11  -1   0  135.39   10.80
  11  -1   0  116.79    6.80
 -11   1   0  103.99    7.50
  11   1   0  127.79    6.90
 -11   1   0  109.49    8.10
 -13  -1   0   14.40    4.70
  13  -1   0   13.70    3.30
 -13   1   0   20.10    4.30
  13   1   0   11.50    3.20
 -13   1   0    9.00    3.10
 -15  -1   0  164.28   13.80
  15  -1   0  164.38    9.90
  15   1   0  171.48   10.10
 -15   1   0  164.18   11.10
 -15   1   0  198.18   12.30
  17  -1   0  331.87   15.10
 -17  -1   0  353.96   20.90
 -17   1   0  334.87   16.70
  17   1   0  339.67   15.30
 -19  -1   0  800.32   32.80
  19  -1   0  783.02   25.70
  19   1   0  817.62   26.00
  21  -1   0   66.79    9.40
  21   1   0   78.69    9.50
  23  -1   0  383.96   20.50
  23   1   0  381.86   19.90
  25  -1   0  188.68   16.70
  25   1   0  202.08   26.40
  25   1   0  198.68   16.60
   0  -2   0 2083.99   41.90
   0   2   0 2008.50   41.00
   0   2   0 2116.29   40.20
   2  -2   0 1328.37   26.30
  -2  -2   0 1326.27   30.60
  -2   2   0 1339.17   28.00
   2   2   0 1295.37   26.70
   2   2   0 1382.66   26.20
  -4  -2   0 1319.87   32.50
   4  -2   0 1322.87   27.00
   4   2   0 1356.46   26.50
  -4   2   0 1333.37   29.50
  -4   2   0 1296.67   29.80
   6  -2   0   15.80    2.40
  -6  -2   0   19.00    4.00
   6   2   0   22.50    4.30
  -6   2   0   11.40    2.70
   6   2   0   21.90    2.70
   8  -2   0  611.14   16.10
  -8  -2   0  612.04   22.10
   8   2   0  636.14   15.80
   8   2   0  620.14   20.30
  -8   2   0  624.74   18.70
  10  -2   0 1325.17   30.30
 -10  -2   0 1329.47   38.60
  10   2   0 1344.67   29.80
 -10   2   0 1328.97   33.30
  10   2   0 1311.37   36.20
  12  -2   0  695.63   19.60
 -12  -2   0  674.83   26.80
  12   2   0  677.33   25.50
 -12   2   0  692.53   22.20
  12   2   0  694.53   19.10
 -14  -2   0  700.43   28.50
  14  -2   0  679.23   20.50
 -14   2   0  691.43   23.40
  14   2   0  642.94   27.40
  14   2   0  682.43   20.30
  16  -2   0  469.05   17.90
 -16  -2   0  514.45   25.90
  16   2   0  502.15   18.00
 -16   2   0  528.35   21.30
  16   2   0  537.45   25.90
 -18  -2   0   64.39   11.30
  18  -2   0   60.39    8.20
  18   2   0   76.89    8.80
  18   2   0  109.89   15.40
 -18   2   0   47.60    7.80
 -20  -2   0   67.49   12.10
  20  -2   0  103.29   11.50
  20   2   0  115.79   17.40
  20   2   0  104.29   11.00
  22  -2   0   29.40    8.60
  22   2   0   57.09   16.00
  22   2   0   41.30    8.10
  24  -2   0   21.40    7.80
  24   2   0   32.50    8.30
  24   2   0   12.70   13.30
  26  -2   0   16.30    8.70
  26   2   0   -6.70   13.80
  26   2   0   15.80    7.90
   1  -3   0 1051.49   24.30
  -1  -3   0 1038.30   26.20
   1   3   0  999.10   23.70
  -1   3   0 1048.80   23.50
   1   3   0 1050.69   22.60
  -1   3   0  999.00   24.60
   3  -3   0  330.97    9.20
  -3  -3   0  323.07   13.30
   3   3   0  318.77    9.70
  -3   3   0  323.17   10.90
   3   3   0  341.27    9.10
  -3   3   0  315.57   11.80
  -5  -3   0  170.68   10.50
   5  -3   0  186.48    6.90
  -5   3   0  177.68    9.20
   5   3   0  191.38    6.50
  -5   3   0  180.68    8.60
   7  -3   0 1643.34   34.70
  -7  -3   0 1610.94   43.10
   7   3   0 1663.03   34.00
  -7   3   0 1597.54   38.70
  -7   3   0 1661.03   38.80
  -9  -3   0 1786.12   48.30
   9  -3   0 1732.63   38.20
  -9   3   0 1795.12   42.90
   9   3   0 1788.12   37.60
   9   3   0 1813.02   44.30
 -11  -3   0 2510.95   63.79
  11  -3   0 2432.26   51.89
  11   3   0 2470.05   59.39
 -11   3   0 2445.06   56.69
  11   3   0 2519.15   51.39
 -13  -3   0 2202.88   60.79
  13  -3   0 2189.88   48.80
 -13   3   0 2258.27   53.79
  13   3   0 2254.67   48.40
  13   3   0 2233.38   57.49
  15  -3   0  551.54   18.90
 -15  -3   0  533.55   27.30
  15   3   0  565.74   26.00
 -15   3   0  567.74   22.70
  15   3   0  549.65   18.20
  17  -3   0  136.79   10.90
 -17  -3   0  105.19   15.10
  17   3   0  151.28   10.60
  17   3   0  141.89   16.30
 -17   3   0  135.29   13.30
  19  -3   0   21.10    6.00
 -19  -3   0   20.00    9.00
  19   3   0   13.50    8.70
  19   3   0   18.20    5.70
 -19   3   0   10.00    5.60
 -21  -3   0   65.69   12.90
  21  -3   0   59.29    9.20
  21   3   0   69.59   15.30
  21   3   0   58.99    8.80
  23  -3   0   28.00    8.00
  23   3   0   26.50   13.80
  23   3   0   27.50    7.50
  25  -3   0   27.30    9.20
  25   3   0   26.70   16.30
  25   3   0   15.70    7.70
   0  -4   0 2315.87   50.69
   0   4   0 2343.37   47.50
   0   4   0 2269.07   49.40
  -2  -4   0 1024.90   28.90
   2  -4   0 1052.69   25.30
   2  -4   0 1015.40   23.20
   2   4   0 1072.89   23.80
  -2   4   0 1068.49   25.50
  -2   4   0 1028.00   27.00
   2   4   0 1015.00   25.20
  -4  -4   0  360.86   16.30
   4  -4   0  387.66   11.30
   4   4   0  394.96   11.00
  -4   4   0  365.56   13.20
  -4   4   0  373.66   14.60
   4   4   0  376.06   11.90
  -6  -4   0  416.06   18.70
   6  -4   0  403.36   12.40
  -6   4   0  406.76   16.10
   6   4   0  428.86   11.80
  -6   4   0  403.16   15.10
  -8  -4   0  813.32   29.40
   8  -4   0  794.92   20.70
  -8   4   0  846.82   25.10
  -8   4   0  808.62   25.40
   8   4   0  802.82   19.90
 -10  -4   0 1542.65   46.30
  10  -4   0 1492.55   34.90
 -10   4   0 1547.45   40.50
 -10   4   0 1579.04   40.90
  10   4   0 1552.74   34.30
  12  -4   0 1504.65   36.20
 -12  -4   0 1596.44   48.80
 -12   4   0 1531.95   42.40
 -12   4   0 1554.94   41.90
  12   4   0 1556.94   35.50
 -14  -4   0  830.82   34.90
  14  -4   0  790.72   23.80
 -14   4   0  857.31   30.10
  14   4   0  814.92   23.20
 -14   4   0  844.02   29.30
 -16  -4   0    0.70    7.30
  16  -4   0    6.70    4.30
 -16   4   0    7.30    5.80
  16   4   0    9.30    4.20
  16   4   0    5.90    6.90
 -16   4   0    2.00    4.60
  18  -4   0    5.90    5.10
 -18  -4   0   -1.90    7.50
  18   4   0    5.90    4.20
  18   4   0   -3.80    7.30
 -18   4   0   -6.90    6.90
 -18   4   0    3.20    4.90
  20  -4   0   89.29   10.30
 -20  -4   0   91.89   14.80
  20   4   0  120.99   17.90
 -20   4   0   71.89   10.70
 -20   4   0   88.29   14.60
  22  -4   0  120.79   13.30
 -22  -4   0   93.49   15.70
  22   4   0  125.49   12.70
 -22   4   0   68.69   14.10
  22   4   0  113.99   18.10
  24  -4   0  142.99   15.50
  24   4   0  117.29   20.40
  24   4   0   98.09   11.70
 -24   4   0   81.29   17.40
  -1  -5   0   17.00    4.10
   1  -5   0   22.60    4.30
   1   5   0   14.70    3.30
   1   5   0   23.30    3.60
  -1   5   0   19.00    3.60
  -1   5   0   13.80    3.50
  -3  -5   0   30.70    5.70
   3  -5   0   31.50    3.70
   3  -5   0   34.10    4.20
  -3   5   0   33.30    4.70
  -3   5   0   27.80    4.50
   3   5   0   27.40    3.90
   3   5   0   41.20    4.30
   5  -5   0   13.50    2.90
  -5  -5   0   15.00    4.60
   5   5   0   14.50    2.70
  -5   5   0   12.50    3.80
   5   5   0   14.20    2.90
  -5   5   0    3.50    3.10
  -7  -5   0  197.78   14.60
   7  -5   0  207.48    9.10
  -7   5   0  209.08   11.70
  -7   5   0  199.38   12.60
   7   5   0  196.58    8.30
   9  -5   0  154.88    8.60
  -9  -5   0  163.68   14.40
  -9   5   0  156.38   11.90
  -9   5   0  166.68   11.70
   9   5   0  163.48    8.00
  11  -5   0   14.20    3.70
 -11  -5   0   21.80    6.90
 -11   5   0   23.60    5.90
  11   5   0   22.50    3.70
 -11   5   0   20.50    5.20
  13  -5   0  128.99    9.30
 -13  -5   0  173.38   17.00
 -13   5   0  143.09   13.10
  13   5   0  132.49    8.70
 -13   5   0  123.59   12.50
 -15  -5   0   60.19   11.80
  15  -5   0   45.90    6.60
 -15   5   0   42.00    7.70
  15   5   0   50.19    6.50
 -15   5   0   40.40    8.60
  17  -5   0   10.20    5.10
 -17  -5   0    7.20   10.20
  17   5   0   18.30    5.50
 -17   5   0    4.50    6.50
 -17   5   0   12.10    6.20
  19  -5   0   23.00    6.80
 -19  -5   0    8.40    9.70
  19   5   0   22.50    6.10
 -19   5   0   19.90   10.10
 -19   5   0   11.30    6.50
 -21  -5   0   24.50   12.30
  21  -5   0   27.10    7.30
 -21   5   0   14.20    7.50
  21   5   0   36.00    7.60
 -21   5   0   14.00   10.00
  23  -5   0    7.20    6.90
 -23  -5   0    4.10   10.80
  23   5   0    7.50    6.00
 -23   5   0   11.50   10.20
  25  -5   0    4.70    7.70
 -25  -5   0   -1.20   12.90
  25   5   0   14.30    7.30
 -25   5   0    4.80   12.00
   0  -6   0  328.57   15.60
   0   6   0  340.67   15.00
   0   6   0  329.37   12.90
   2  -6   0  445.26   16.90
  -2  -6   0  455.45   19.70
  -2   6   0  462.35   18.50
  -2   6   0  463.05   16.30
   2   6   0  424.66   16.60
   2   6   0  454.65   15.00
  -4  -6   0    1.10    3.20
   4  -6   0    3.90    2.50
   4  -6   0    7.50    2.90
  -4   6   0    3.80    3.20
  -4   6   0    1.70    3.00
   4   6   0    4.60    2.40
   4   6   0    6.80    3.00
  -6  -6   0   51.29    8.40
   6  -6   0   56.69    5.70
   6   6   0   59.89    6.40
  -6   6   0   45.30    6.60
  -6   6   0   56.49    7.00
   6   6   0   51.59    5.20
  -8  -6   0  436.66   23.20
   8  -6   0  469.85   15.50
  -8   6   0  471.55   19.20
  -8   6   0  471.55   20.50
   8   6   0  461.35   14.60
  10  -6   0  281.87   12.20
 -10  -6   0  300.37   20.10
 -10   6   0  300.47   17.00
 -10   6   0  276.07   15.80
  10   6   0  269.47   11.30
 -12  -6   0  733.33   33.50
  12  -6   0  738.43   22.50
 -12   6   0  728.03   27.80
 -12   6   0  768.42   28.80
  12   6   0  713.83   21.30
 -14  -6   0  262.67   22.40
  14  -6   0  268.37   13.60
 -14   6   0  257.77   18.20
 -14   6   0  289.87   18.40
  14   6   0  238.98   12.40
  16  -6   0   68.69    8.40
 -16  -6   0   64.49   13.60
  16   6   0   87.49    9.20
 -16   6   0   67.39   11.70
 -16   6   0   69.79   10.50
  18  -6   0    7.10    5.40
 -18  -6   0    2.20    8.80
 -18   6   0    4.50    8.40
 -18   6   0    1.90    5.90
  18   6   0    6.70    4.70
  20  -6   0    9.60    6.30
 -20  -6   0   -8.90    8.90
  20   6   0   10.50    5.60
 -20   6   0    9.80    8.70
 -20   6   0    7.70    7.00
 -22  -6   0   24.40   13.00
  22  -6   0   45.50    9.50
  22   6   0   27.60    7.30
 -22   6   0   22.90   11.30
 -22   6   0   27.50   11.10
 -24  -6   0    6.50   12.90
  24  -6   0    7.90    7.90
 -24   6   0   -7.40   11.10
  24   6   0    5.70    6.50
   1  -7   0 1267.07   36.00
  -1  -7   0 1265.17   38.00
  -1   7   0 1252.07   36.00
   1   7   0 1278.97   35.50
  -1   7   0 1254.67   32.50
   1   7   0 1278.07   32.20
   3  -7   0  191.48   11.10
  -3  -7   0  193.58   14.40
  -3   7   0  198.38   13.10
  -3   7   0  192.78   11.20
   3   7   0  194.38   11.90
   3   7   0  186.78    9.80
  -5  -7   0  230.58   16.30
   5  -7   0  230.48   10.80
   5   7   0  232.28   10.50
  -5   7   0  224.78   12.70
   5   7   0  221.48   12.30
  -5   7   0  218.18   14.10
   7  -7   0  459.85   16.00
  -7  -7   0  462.25   24.20
  -7   7   0  456.05   21.00
   7   7   0  452.05   16.60
   7   7   0  451.55   15.20
  -7   7   0  439.76   18.90
   9  -7   0 1159.88   30.20
  -9  -7   0 1169.78   42.50
   9   7   0 1168.58   29.20
  -9   7   0 1163.38   35.20
  -9   7   0 1153.28   37.20
 -11  -7   0 1404.96   49.10
  11  -7   0 1309.57   34.20
 -11   7   0 1387.26   42.50
  11   7   0 1328.27   33.20
 -11   7   0 1345.67   40.70
  13  -7   0 1190.88   32.50
 -13  -7   0 1178.08   47.10
 -13   7   0 1247.78   40.70
  13   7   0 1151.68   31.20
 -13   7   0 1232.98   39.90
 -15  -7   0  341.57   27.30
  15  -7   0  370.16   16.90
 -15   7   0  345.27   22.20
  15   7   0  346.27   15.60
 -15   7   0  353.26   22.40
  17  -7   0   16.80    6.50
 -17  -7   0    6.80    9.50
 -17   7   0    8.90    8.50
 -17   7   0   22.00    8.40
  17   7   0   24.40    5.80
 -19  -7   0    1.00    9.50
  19  -7   0   -1.20    5.40
 -19   7   0  -10.40    5.70
  19   7   0    3.40    4.60
 -19   7   0   -5.00    6.80
  21  -7   0   47.80   10.20
 -21  -7   0   46.00   13.90
 -21   7   0   43.00   13.30
 -21   7   0   30.30    9.30
  21   7   0   34.50    7.70
  23  -7   0    3.80    7.60
 -23  -7   0   -3.30   11.60
  23   7   0   -1.90    7.00
 -23   7   0   -6.30   10.30
   0  -8   0   44.20    7.30
   0   8   0   42.30    5.90
   0   8   0   33.30    6.30
   2  -8   0   13.30    4.30
  -2  -8   0   20.00    5.80
   2   8   0   11.30    4.40
  -2   8   0   18.20    4.90
  -2   8   0   15.30    4.20
   2   8   0   20.70    4.40
   4  -8   0  152.88   10.70
  -4  -8   0  138.89   14.20
   4   8   0  147.69   11.80
  -4   8   0  126.39   10.50
  -4   8   0  157.98   12.90
   4   8   0  155.08    9.80
   6  -8   0  228.88   12.00
  -6  -8   0  232.58   18.60
   6   8   0  224.28   11.50
   6   8   0  218.58   13.50
  -6   8   0  239.08   14.40
  -6   8   0  238.48   16.20
  -8  -8   0  775.32   35.00
   8  -8   0  789.52   23.90
  -8   8   0  778.92   28.00
   8   8   0  776.52   22.90
  -8   8   0  752.02   30.00
   8   8   0  833.42   27.70
 -10  -8   0  997.70   41.50
  10  -8   0  926.31   27.50
 -10   8   0  931.11   32.50
 -10   8   0  969.20   35.20
  10   8   0  950.80   26.40
  12  -8   0  912.01   27.50
 -12  -8   0  918.51   41.60
  12   8   0  869.61   25.90
 -12   8   0  911.01   35.50
 -12   8   0  932.21   33.70
 -14  -8   0  498.15   32.60
  14  -8   0  539.05   20.80
  14   8   0  518.65   19.30
 -14   8   0  507.65   27.40
 -14   8   0  548.95   27.00
  16  -8   0   33.40    7.10
 -16  -8   0   30.70   12.30
  16   8   0   38.70    6.80
 -16   8   0   24.70    8.70
 -16   8   0   52.39   10.90
  18  -8   0    7.50    6.70
 -18  -8   0   20.10   12.00
 -18   8   0   17.00    8.20
 -18   8   0    7.90    8.70
  18   8   0    3.00    4.70
  20  -8   0    8.70    7.00
 -20  -8   0   12.50   11.10
 -20   8   0   10.80   10.70
 -20   8   0   14.20    8.40
 -22  -8   0    5.80   12.50
  22  -8   0    8.20    8.00
 -22   8   0  -11.00   10.50
 -22   8   0    4.60    8.00
  -1  -9   0  406.66   21.30
   1  -9   0  384.96   20.00
  -1   9   0  384.16   16.80
   1   9   0  390.56   16.50
  -1   9   0  394.86   20.20
   1   9   0  392.16   20.10
  -3  -9   0  499.85   25.10
   3  -9   0  499.15   21.50
   3   9   0  471.45   18.30
  -3   9   0  486.85   19.70
   3   9   0  479.75   21.90
  -3   9   0  480.85   23.10
  -5  -9   0  304.07   21.30
   5   9   0  297.77   14.40
  -5   9   0  289.77   16.50
   5   9   0  291.37   17.30
  -5   9   0  319.47   19.30
   7  -9   0  141.99   10.90
  -7  -9   0  162.78   18.40
   7   9   0  111.69   10.00
  -7   9   0  151.38   13.20
  -7   9   0  148.59   14.40
   7   9   0  162.08   13.30
   9  -9   0  188.48   12.40
  -9  -9   0  182.88   21.10
  -9   9   0  183.28   16.70
   9   9   0  179.48   11.10
  -9   9   0  204.98   15.60
  11  -9   0   25.30    6.30
 -11  -9   0   18.20   10.40
 -11   9   0   11.70    6.60
  11   9   0   21.60    4.90
 -11   9   0   20.60    7.60
 -13  -9   0   27.90   11.00
  13  -9   0   26.30    6.70
 -13   9   0   17.10    8.30
 -13   9   0   19.30    8.40
 -15  -9   0   51.09   13.80
  15  -9   0   39.40    8.00
 -15   9   0   39.30    9.80
 -15   9   0   55.29   11.50
  15   9   0   35.40    9.70
  17  -9   0   12.30    6.80
 -17  -9   0   14.20   11.50
 -17   9   0    9.30    9.40
 -17   9   0   17.60    8.00
  19  -9   0   64.69   10.00
 -19  -9   0   63.29   16.30
 -19   9   0   47.40   11.00
 -19   9   0   64.89   13.90
 -21  -9   0   40.70   16.60
  21  -9   0   37.70    8.70
 -21   9   0   39.60   13.10
 -21   9   0   27.60   10.20
   0 -10   0 2382.56   62.89
   0  10   0 2329.77   61.59
   0  10   0 2203.78   54.49
  -2 -10   0 1465.25   47.50
   2 -10   0 1440.26   43.60
  -2  10   0 1454.55   45.20
  -2  10   0 1400.06   39.20
   2  10   0 1467.05   44.50
   2  10   0 1385.36   38.20
  -4 -10   0  805.32   34.80
   4  10   0  785.02   30.10
  -4  10   0  788.12   27.30
  -4  10   0  803.92   32.10
   4  10   0  726.93   25.40
  -6 -10   0  132.99   17.10
  -6  10   0  143.19   13.10
   6  10   0  139.19   11.50
   6  10   0  155.38   14.50
  -6  10   0  146.39   16.40
  -8 -10   0    3.40    6.90
  -8  10   0    0.40    5.20
   8  10   0   -4.20    3.70
  -8  10   0   -5.90    5.40
  10 -10   0   22.50    6.40
 -10 -10   0   26.50   10.80
 -10  10   0   18.30    7.10
 -10  10   0   21.40    8.00
 -12 -10   0   10.50    9.20
  12 -10   0    5.90    5.40
 -12  10   0    4.60    7.40
 -12  10   0   10.70    6.80
 -14 -10   0   -0.40    8.80
  14 -10   0  -10.00    5.10
 -14  10   0    8.50    7.60
 -14  10   0    3.20    8.20
 -16 -10   0   12.60   11.40
  16 -10   0    4.90    6.20
 -16  10   0   20.60   10.10
 -16  10   0   22.30    8.90
  18 -10   0  137.09   14.80
 -18 -10   0  104.29   19.70
 -18  10   0   85.09   14.10
 -18  10   0   95.89   15.10
  20 -10   0   83.09   11.50
 -20 -10   0   87.99   19.00
 -20  10   0  102.99   16.50
 -20  10   0  111.39   16.80
  -1 -11   0 1626.04   51.89
   1 -11   0 1656.63   50.49
  -1  11   0 1604.04   43.80
   1  11   0 1690.43   50.89
  -1  11   0 1656.53   50.69
   1  11   0 1568.64   43.00
  -3 -11   0  714.83   33.70
   3  11   0  685.43   25.40
   3  11   0  736.33   30.80
  -3  11   0  734.93   26.60
  -3  11   0  729.23   32.30
  -5 -11   0  252.97   22.00
   5  11   0  229.18   17.90
  -5  11   0  227.78   15.60
  -5  11   0  224.88   20.00
  -7 -11   0   15.30    8.60
  -7  11   0   13.10    6.40
  -7  11   0    3.40    7.00
  -9 -11   0   84.79   14.90
  -9  11   0   72.09   11.10
  -9  11   0   67.09   12.40
 -11 -11   0   15.60    9.70
  11 -11   0   23.00    6.90
 -11  11   0   11.40    7.50
 -11  11   0   18.00    8.10
  13 -11   0    6.00    6.20
 -13 -11   0   19.30   11.30
 -13  11   0    4.60    7.80
 -13  11   0   10.50    7.80
  15 -11   0   36.40    8.50
 -15 -11   0   20.80   13.00
 -15  11   0   30.30   10.50
 -15  11   0   26.60   10.10
 -17 -11   0   27.00   14.30
  17 -11   0   23.10    8.00
 -17  11   0   32.90   12.00
 -17  11   0   20.90   10.50
   0 -12   0 1084.99   54.19
   0  12   0 1050.09   40.10
  -2 -12   0   20.30    8.60
   2  12   0   20.50    7.70
  -2  12   0   15.40    7.80
  -2  12   0   13.50    6.50
  -4 -12   0  220.08   21.50
  -4  12   0  227.88   16.40
  -4  12   0  197.88   20.20
   4  12   0  207.38   19.20
  -6 -12   0   -3.40    7.80
  -6  12   0   11.40    6.50
  -6  12   0    2.70    6.50
  -8 -12   0   17.30   10.70
  -8  12   0   15.40    7.30
  -8  12   0    2.60    6.00
 -10 -12   0   24.50   11.80
 -10  12   0   21.60    9.00
 -10  12   0   26.80    8.80
 -12 -12   0   -8.70    9.50
 -12  12   0    1.00    8.10
 -12  12   0   -2.30    7.60
  14 -12   0   84.49   12.10
 -14 -12   0   98.89   20.00
 -14  12   0  107.29   16.70
 -14  12   0  111.19   16.10
 -16 -12   0   28.80   15.30
  16 -12   0   19.00    9.10
 -16  12   0   20.60   12.00
 -16  12   0   47.20   12.00
   1  13   0    4.60    6.40
  -1  13   0   10.90    7.50
  -3 -13   0   27.00   10.50
  -3  13   0   24.90    9.00
   3  13   0   30.70   10.00
  -5 -13   0   27.40   10.60
  -5  13   0   17.50    8.60
  -7 -13   0   18.10   10.80
  -7  13   0   11.90    8.10
  -9 -13   0  217.58   26.80
  -9  13   0  203.48   19.40
  -9  13   0  236.28   24.10
 -11 -13   0   90.99   18.40
 -11  13   0  135.39   16.50
 -11  13   0  115.29   16.80
 -13 -13   0  293.57   32.60
 -13  13   0  328.87   29.30
 -13  13   0  292.87   24.60
   0  14   0   58.69   12.10
  -2  14   0  101.99   14.90
  -4 -14   0    7.80    9.80
  -4  14   0   31.30   10.20
  -6 -14   0   51.89   14.10
  -6  14   0   57.09   13.30
  -8 -14   0   64.09   16.00
  -8  14   0   56.29   13.80
 -10 -14   0  193.88   25.50
 -10  14   0  255.27   26.30
  -1  15   0   46.80   12.20
  -3  15   0   21.70   10.60
  -5  15   0    6.20    9.60
  26   0  -1    5.90    7.60
  24   0  -1   13.20    7.20
  22   0  -1    0.70    5.90
  20   0  -1   -2.40    4.40
  18   0  -1   35.50    6.40
 -18   0   1   23.70    6.40
 -16   0   1   19.90    5.40
  16   0  -1   15.60    4.30
 -14   0   1   23.10    3.70
  14   0  -1   27.50    4.50
 -14   0   1   21.50    4.80
 -12   0   1    6.40    3.00
 -12   0   1    3.50    2.20
  12   0  -1    5.10    2.50
  10   0  -1   -1.90    1.50
 -10   0   1    0.80    2.10
 -10   0   1   -0.50    1.60
   8   0  -1    6.80    1.80
  -8   0   1    4.60    1.60
  -8   0   1    6.60    2.40
  -6   0   1    7.70    1.60
  -6   0   1    9.60    2.30
   6   0  -1    7.10    1.60
  -4   0   1   13.90    1.70
   4   0  -1    7.60    1.30
  -4   0   1    8.90    1.70
  -2   0   1   -6.20    0.20
   2   0  -1   -5.90    0.20
  -2   0   1   -5.90    0.20
   0   0   1   -7.40    0.40
   0   0   1   -8.20    0.20
   2   0   1    1.30    0.90
   2   0   1    2.60    0.70
   2   0   1    3.80    0.80
  -2   0  -1    1.70    0.70
  -2   0  -1    1.90    0.90
  -4   0  -1   47.40    3.80
  -4   0  -1   42.50    2.80
   4   0   1   47.70    3.60
   4   0   1   47.90    3.00
   6   0   1   50.99    3.80
   6   0   1   36.30    3.90
  -6   0  -1   39.40    4.60
   8   0   1   60.99    4.30
   8   0   1   54.59    4.50
   8   0   1   47.40    4.80
  -8   0  -1   42.30    5.40
 -10   0  -1   38.40    4.40
 -10   0  -1   33.00    5.20
  10   0   1   51.49    4.90
 -12   0  -1   -1.00    2.90
  12   0   1   -0.50    2.40
 -12   0  -1    1.50    2.00
 -14   0  -1    2.50    2.70
 -14   0  -1    0.30    3.70
  14   0   1   -1.50    2.80
  16   0   1   16.40    4.70
 -16   0  -1    9.60    3.80
 -16   0  -1   15.10    5.80
  18   0   1   15.00    5.50
 -18   0  -1   18.80    6.80
  20   0   1   17.10    5.90
  22   0   1    1.40    6.60
  24   0   1    1.30    6.70
  26   0   1   -2.10    7.80
  27  -1  -1   34.60    9.70
  27   1  -1   37.30    9.90
  27   1  -1   63.19   19.40
  25  -1  -1   46.70    9.80
  25   1  -1   47.00    9.80
  25   1  -1   41.30   14.90
  23  -1  -1  116.69   12.70
  23   1  -1  153.38   14.10
  21  -1  -1  108.49   11.70
  21   1  -1  120.89   12.00
  19  -1  -1  145.59   12.10
 -19  -1   1  131.89   15.20
  19   1  -1  151.48   12.00
 -17  -1   1  826.72   31.10
  17  -1  -1  835.82   24.70
 -17   1   1  802.32   25.90
 -17   1   1  847.92   27.70
  17   1  -1  788.42   24.40
  15  -1  -1  581.24   18.80
 -15  -1   1  596.44   24.50
  15   1  -1  593.64   19.00
 -15   1   1  590.64   20.30
 -15   1   1  621.04   21.20
 -13  -1   1  668.23   24.50
  13  -1  -1  598.14   18.10
 -13   1   1  625.54   19.90
 -13   1   1  638.34   20.50
  13   1  -1  629.84   18.50
  11  -1  -1   14.30    2.90
 -11  -1   1   14.60    4.20
 -11   1   1   11.90    3.20
 -11   1   1   13.10    3.10
  11   1  -1   11.80    2.80
   9  -1  -1  267.97    9.30
  -9  -1   1  278.77   13.30
  -9   1   1  263.27   10.50
   9   1  -1  269.07    9.20
  -9   1   1  282.57   10.40
  -7  -1   1 1588.14   37.80
   7  -1  -1 1513.45   32.00
  -7   1   1 1541.85   33.90
   7   1  -1 1532.55   32.00
  -7   1   1 1631.44   32.90
  -5  -1   1 7182.68  135.29
   5  -1  -1 7169.98  130.19
   5   1  -1 7069.79  133.59
   5   1  -1 7225.48  130.19
  -5   1   1 7033.40  132.09
   3  -1  -1  107.79    3.50
  -3  -1   1  105.19    5.40
  -3   1   1  110.49    4.70
   3   1  -1  113.89    3.70
   3   1  -1  117.59    5.10
  -1  -1   1   14.60    1.60
   1   1  -1   11.90    1.00
   1   1  -1   11.70    1.20
  -1   1   1   14.00    1.60
   1  -1   1   19.10    2.10
  -1  -1  -1   14.90    1.90
   1  -1   1   18.00    1.20
   1  -1   1   11.50    1.20
   1   1   1   12.40    1.40
   1   1   1   14.50    0.80
   1   1   1   14.20    1.50
  -1   1  -1   16.50    1.80
  -1   1  -1   17.30    1.60
   3  -1   1  191.48    5.80
   3  -1   1  199.58    5.10
  -3  -1  -1  204.18    8.00
   3  -1   1  201.18    7.50
   3   1   1  190.48    5.70
   3   1   1  198.58    5.30
   3   1   1  210.08    7.50
  -3   1  -1  196.28    7.20
  -3   1  -1  192.18    6.40
   3   1   1  195.78    6.60
   5  -1   1 1183.58   27.90
  -5  -1  -1 1198.38   29.40
   5  -1   1 1191.58   24.10
   5  -1   1 1198.28   25.10
   5   1   1 1196.48   24.50
   5   1   1 1254.27   25.20
   5   1   1 1222.28   26.80
  -5   1  -1 1147.09   26.00
  -5   1  -1 1197.98   25.60
   7  -1   1  964.30   22.10
   7  -1   1  983.70   21.40
  -7  -1  -1  964.20   20.70
  -7  -1  -1  982.20   27.20
   7  -1   1  940.51   24.90
   7   1   1  977.00   21.60
  -7   1  -1  997.40   23.70
   7   1   1  987.50   24.00
  -7   1  -1  915.51   22.80
   7   1   1  992.30   22.20
   9  -1   1  845.72   20.50
  -9  -1  -1  795.32   25.70
   9  -1   1  833.52   20.20
   9   1   1  828.82   20.10
   9   1   1  815.32   20.60
  -9   1  -1  790.02   21.30
  -9   1  -1  833.82   22.80
 -11  -1  -1  218.68    8.60
  11  -1   1  239.28    9.90
 -11  -1  -1  237.08   14.10
 -11   1  -1  246.08   12.10
 -11   1  -1  224.38   10.50
  11   1   1  231.38   10.00
  11   1   1  241.08    9.80
 -13  -1  -1    7.60    4.90
  13  -1   1   12.00    3.50
 -13   1  -1    7.90    3.40
 -13   1  -1   16.40    4.80
  13   1   1    8.60    3.30
 -15  -1  -1   67.59   10.00
  15  -1   1   77.89    8.00
  15   1   1   79.39    7.80
 -15   1  -1   69.39    9.00
 -15   1  -1   67.39    8.70
  17  -1   1  308.07   15.00
 -17  -1  -1  283.87   19.90
 -17   1  -1  296.47   16.20
  17   1   1  318.27   14.80
  19  -1   1  174.38   13.00
 -19  -1  -1  157.18   17.30
  19   1   1  159.88   12.20
  21  -1   1  253.27   16.30
  21   1   1  258.07   15.90
  23  -1   1   17.40    8.10
  23   1   1   26.70    8.00
  25  -1   1   23.60    9.00
  25   1   1   24.60   15.20
  25   1   1   23.60    8.50
  26  -2  -1  107.39   13.90
  26   2  -1   88.29   11.70
  26   2  -1   80.09   19.30
  24  -2  -1   28.30    8.20
  24   2  -1   34.30   13.90
  24   2  -1   44.70    9.20
  22  -2  -1    6.70    6.00
  22   2  -1    4.20    5.60
  22   2  -1    6.30   10.40
 -20  -2   1   65.29   11.80
  20  -2  -1   76.29    9.10
  20   2  -1   76.39   14.40
  20   2  -1   71.49    8.80
  18  -2  -1 1154.28   32.00
 -18  -2   1 1133.09   40.80
  18   2  -1 1210.18   42.10
  18   2  -1 1169.08   32.10
 -18   2   1 1143.29   34.70
  16  -2  -1  864.31   24.90
 -16  -2   1  871.01   33.10
  16   2  -1  872.61   32.90
  16   2  -1  878.91   25.10
 -16   2   1  864.91   27.90
  14  -2  -1 1128.69   29.10
 -14  -2   1 1174.38   38.00
  14   2  -1 1144.09   36.60
 -14   2   1 1158.08   32.30
  14   2  -1 1170.48   29.10
 -12  -2   1  523.35   22.80
  12  -2  -1  534.25   16.30
 -12   2   1  532.85   19.00
  12   2  -1  553.94   16.40
  12   2  -1  558.04   22.10
  10  -2  -1  319.87   10.90
 -10  -2   1  312.87   16.20
  10   2  -1  303.17   10.70
 -10   2   1  328.37   13.50
  10   2  -1  320.87   15.10
   8  -2  -1  635.54   15.90
  -8  -2   1  604.44   21.80
  -8   2   1  624.34   18.80
   8   2  -1  606.74   19.80
   8   2  -1  631.84   15.80
   6  -2  -1 1315.07   27.40
  -6  -2   1 1296.17   34.00
   6   2  -1 1358.66   27.60
  -6   2   1 1272.07   30.60
   6   2  -1 1324.07   31.50
   4  -2  -1 2259.07   43.50
  -4  -2   1 2273.17   49.60
   4   2  -1 2337.57   43.90
  -4   2   1 2226.58   47.00
  -2  -2   1  462.95   13.80
   2  -2  -1  452.65    9.80
   2  -2  -1  440.76   10.60
  -2   2   1  441.96   11.00
   2   2  -1  452.75   11.00
  -2   2   1  437.96    9.70
   2   2  -1  445.06   10.60
   0  -2   1   49.40    3.40
   0  -2  -1   44.00    3.50
   0   2   1   44.70    2.70
   0   2  -1   45.20    3.30
   0   2   1   49.30    3.50
   0   2  -1   40.90    2.90
   0   2   1   48.10    2.40
  -2  -2  -1  739.63   19.50
   2  -2   1  726.33   16.20
   2   2   1  730.03   17.30
  -2   2  -1  732.43   18.00
   2   2   1  744.93   16.30
   2   2   1  769.92   14.80
  -2   2  -1  698.33   17.50
  -4  -2  -1 1049.49   27.00
   4  -2   1 1019.70   22.10
  -4   2  -1  986.90   23.90
   4   2   1 1013.60   21.10
   4   2   1 1004.60   23.90
   4   2   1 1042.60   20.90
  -4   2  -1 1055.09   24.90
   6  -2   1 5167.08   97.99
  -6  -2  -1 5276.77  105.49
  -6   2  -1 5029.00  100.29
   6   2   1 5217.78  100.99
  -6   2  -1 5323.57  102.19
   6   2   1 5283.47  102.59
   6   2   1 5235.28   96.79
   8  -2   1 2866.31   58.09
  -8  -2  -1 2952.40   66.69
   8   2   1 2965.00   57.29
   8   2   1 2986.80   64.09
  -8   2  -1 2850.41   60.59
  10  -2   1  662.53   18.40
 -10  -2  -1  656.93   25.10
 -10   2  -1  649.54   20.40
  10   2   1  671.23   17.80
  10   2   1  685.53   23.70
  12  -2   1  578.04   17.90
 -12  -2  -1  617.84   25.40
  12   2   1  592.04   23.80
 -12   2  -1  570.04   20.00
  12   2   1  589.54   17.40
  14  -2   1  212.98   11.00
 -14  -2  -1  204.78   16.20
 -14   2  -1  225.08   12.10
  14   2   1  206.08   10.70
 -14   2  -1  199.48   12.70
  14   2   1  198.68   15.80
  16  -2   1  182.58   11.60
 -16  -2  -1  195.78   17.70
  16   2   1  222.78   17.90
 -16   2  -1  180.58   13.30
  16   2   1  191.08   11.30
  18  -2   1  326.07   16.30
 -18  -2  -1  330.27   22.80
  18   2   1  367.66   16.20
 -18   2  -1  341.37   18.70
  18   2   1  342.87   23.90
  20  -2   1  178.58   13.80
 -20  -2  -1  150.88   19.30
  20   2   1  168.68   21.00
  20   2   1  195.48   13.30
  22  -2   1   -8.20    5.70
  22   2   1    5.20    5.80
  22   2   1    2.30   11.50
  24  -2   1   55.89   10.90
  24   2   1   70.19   17.50
  24   2   1   52.59    9.70
  25  -3  -1    4.50    7.30
  25   3  -1    1.70   12.40
  25   3  -1   14.60    7.30
  23  -3  -1    4.70    6.50
 -23  -3   1    9.20    9.20
  23   3  -1    8.00    6.30
  23   3  -1   16.00   11.90
  21  -3  -1    9.60    6.00
 -21  -3   1    6.00    7.50
  21   3  -1    2.80    8.50
  21   3  -1    4.00    5.00
  19  -3  -1   58.99    8.20
 -19  -3   1   54.99   11.40
  19   3  -1   62.09    7.90
 -19   3   1   37.70    7.30
  19   3  -1   64.69   13.40
  17  -3  -1  426.86   17.10
 -17  -3   1  415.06   24.70
  17   3  -1  430.76   16.70
 -17   3   1  395.26   20.10
  17   3  -1  444.86   24.50
  15  -3  -1  294.37   13.30
 -15  -3   1  323.37   20.70
 -15   3   1  311.97   16.70
  15   3  -1  304.07   19.10
  15   3  -1  328.47   13.60
 -13  -3   1  401.36   21.80
  13  -3  -1  390.36   14.30
  13   3  -1  399.96   19.90
 -13   3   1  410.46   17.90
  13   3  -1  387.16   13.90
 -11  -3   1  463.25   22.00
  11  -3  -1  454.85   14.50
  11   3  -1  454.55   19.50
 -11   3   1  452.35   18.10
  11   3  -1  464.35   14.40
  -9  -3   1  360.56   17.90
   9  -3  -1  364.46   11.70
   9   3  -1  344.87   11.40
  -9   3   1  336.67   14.60
   7  -3  -1   43.70    3.90
  -7  -3   1   30.70    5.30
   7   3  -1   43.60    3.80
  -7   3   1   50.39    6.00
  -5  -3   1  123.29    8.90
   5  -3  -1   99.49    4.80
  -5   3   1  108.79    7.50
   5   3  -1  107.19    5.10
  -5   3   1  118.89    6.60
   3  -3  -1 1865.91   37.00
  -3  -3   1 1878.41   43.70
  -3   3   1 1927.01   39.30
   3   3  -1 1957.50   38.60
   3   3  -1 1907.81   38.40
  -3   3   1 1836.92   41.50
   1  -3  -1  118.69    6.20
  -1  -3   1  121.69    7.10
  -1   3   1  118.99    5.20
   1   3  -1  107.69    5.70
   1   3  -1  130.49    6.00
  -1   3   1  124.49    6.90
  -1   3   1  117.89    5.00
  -1  -3  -1  493.05   15.70
   1  -3   1  505.35   13.70
  -1   3  -1  475.95   14.20
   1   3   1  471.15   13.90
  -1   3  -1  505.55   14.30
   1   3   1  503.25   11.70
   1   3   1  481.55   13.40
   3  -3   1 1282.57   27.60
  -3  -3  -1 1324.27   33.10
  -3   3  -1 1290.87   30.10
   3   3   1 1258.77   27.50
  -3   3  -1 1296.87   30.30
   3   3   1 1281.67   29.60
   3   3   1 1338.17   25.90
  -5  -3  -1  891.81   26.80
   5  -3   1  879.81   20.70
  -5   3  -1  854.31   23.30
   5   3   1  906.31   19.30
  -5   3  -1  895.11   23.90
   5   3   1  874.21   23.20
   7  -3   1 1307.47   29.50
  -7  -3  -1 1369.66   37.80
  -7   3  -1 1341.47   33.80
  -7   3  -1 1278.17   32.60
   7   3   1 1327.87   28.20
   9  -3   1  124.69    7.30
  -9  -3  -1  150.18   12.30
   9   3   1  148.59    7.10
  -9   3  -1  143.69   10.00
  -9   3  -1  134.19    9.40
   9   3   1  146.79   11.10
  11  -3   1  145.49    8.40
 -11  -3  -1  161.48   13.80
 -11   3  -1  136.59   11.00
  11   3   1  147.89    7.90
  11   3   1  145.09   12.20
 -11   3  -1  145.09   10.60
  13  -3   1   41.60    5.80
 -13  -3  -1   52.29    9.80
  13   3   1   50.09    5.70
  13   3   1   54.09    9.50
 -13   3  -1   38.00    6.30
 -15  -3  -1    9.70    6.80
  15  -3   1   10.80    4.60
 -15   3  -1   10.90    4.70
  15   3   1   19.50    7.50
  15   3   1   11.60    3.90
  17  -3   1   96.59   10.40
 -17  -3  -1   93.09   13.90
  17   3   1   75.49   14.10
  17   3   1  110.59    9.80
 -17   3  -1  104.09   12.10
  19  -3   1   44.50    8.20
 -19  -3  -1   34.50   10.80
 -19   3  -1   33.90    7.60
  19   3   1   36.40    7.10
  19   3   1   30.60   11.80
  21  -3   1    0.30    6.10
 -21  -3  -1   25.20    9.80
  21   3   1   17.40    6.10
  21   3   1   -3.70   10.40
 -21   3  -1   -0.80    8.70
  23  -3   1   43.30    9.30
 -23   3  -1   29.70   13.30
  23   3   1   56.89   16.90
  23   3   1   48.90    8.80
  25  -3   1   42.60   10.40
  25   3   1   38.30   16.30
 -25   3  -1   23.40   14.30
  25   3   1   32.80    8.80
  26  -4  -1   60.19   12.00
  26   4  -1   43.20    9.60
 -26   4   1   51.49   15.10
  24  -4  -1   38.10    9.40
 -24  -4   1   31.40   12.40
  24   4  -1   46.80   15.50
 -24   4   1   26.80   11.70
  24   4  -1   45.30    9.00
  22  -4  -1    2.90    5.80
 -22  -4   1   -7.50    8.10
  22   4  -1   -8.40    9.10
  22   4  -1   -2.60    4.90
 -20  -4   1   22.40    9.70
  20  -4  -1   22.50    6.80
  20   4  -1   16.40    9.50
  20   4  -1   21.90    6.20
 -20   4   1   20.80    7.10
  18  -4  -1   95.19   10.00
 -18  -4   1   83.99   13.90
  18   4  -1   98.59    9.40
  18   4  -1   81.09   13.40
 -18   4   1  106.89   13.20
 -16  -4   1  233.08   19.80
  16  -4  -1  238.98   12.70
  16   4  -1  257.27   12.60
 -16   4   1  265.67   17.10
  14  -4  -1   25.10    4.60
 -14  -4   1   30.50    8.70
 -14   4   1   31.60    6.60
  14   4  -1   33.70    4.90
  12  -4  -1    8.00    3.20
 -12  -4   1    7.10    5.00
 -12   4   1    4.90    3.70
  12   4  -1    8.20    2.70
 -10  -4   1  276.37   17.50
  10  -4  -1  259.87   10.60
 -10   4   1  284.27   14.20
  10   4  -1  275.67   10.50
 -10   4   1  270.77   14.30
   8  -4  -1  566.24   15.80
  -8  -4   1  558.94   23.60
  -8   4   1  569.14   19.20
  -8   4   1  591.24   20.70
   8   4  -1  578.74   15.80
  -6  -4   1  554.84   21.90
   6  -4  -1  539.65   14.40
   6   4  -1  542.35   14.70
  -6   4   1  535.85   17.20
  -6   4   1  553.24   19.20
  -4  -4   1  350.96   15.70
   4  -4  -1  338.37   10.00
   4   4  -1  361.66   11.10
   4   4  -1  328.87   11.00
  -4   4   1  342.77   12.10
  -4   4   1  344.87   14.00
  -2  -4   1  245.08   11.80
   2  -4  -1  243.58    9.80
   2  -4  -1  229.28    7.60
   2   4  -1  245.98    9.20
  -2   4   1  245.48    9.10
  -2   4   1  233.98   10.80
   2   4  -1  225.88    9.40
   0  -4  -1  182.18    9.50
   0  -4   1  209.38    9.60
   0   4   1  190.08    7.30
   0   4   1  192.98    9.30
   0   4  -1  176.88    8.70
   0   4  -1  182.98    8.30
  -2  -4  -1   33.70    5.20
   2  -4   1   34.90    3.90
   2  -4   1   31.00    3.50
  -2   4  -1   26.10    3.80
  -2   4  -1   35.40    4.40
   2   4   1   27.60    3.70
   2   4   1   38.70    3.30
   4  -4   1  113.89    6.00
  -4  -4  -1  123.09    9.40
   4   4   1  112.39    5.00
   4   4   1  109.99    6.00
  -4   4  -1  115.89    7.80
  -4   4  -1  114.79    7.50
   6  -4   1   54.39    4.70
  -6  -4  -1   37.50    6.10
   6   4   1   57.39    4.00
  -6   4  -1   35.40    5.10
  -6   4  -1   55.39    6.40
   8  -4   1  219.38    9.60
  -8  -4  -1  203.68   14.30
   8   4   1  235.18    8.60
  -8   4  -1  210.08   12.30
  -8   4  -1  224.78   12.30
  10  -4   1  108.29    7.60
 -10  -4  -1  101.79   11.80
 -10   4  -1  112.99    9.80
  10   4   1  113.69    6.80
 -10   4  -1  100.49   10.00
 -12  -4  -1   43.00    9.10
  12  -4   1   21.00    4.80
 -12   4  -1   21.90    6.50
  12   4   1   28.80    4.40
 -12   4  -1   28.90    5.70
  14  -4   1   39.30    6.00
 -14  -4  -1   29.80    8.90
 -14   4  -1   45.60    7.20
  14   4   1   44.00    5.50
  14   4   1   51.09   10.00
 -14   4  -1   40.60    8.00
  16  -4   1  186.38   12.00
 -16  -4  -1  155.68   19.10
 -16   4  -1  206.38   16.50
  16   4   1  180.28   17.60
  16   4   1  182.98   11.40
 -16   4  -1  214.08   15.40
 -18  -4  -1  357.86   26.50
  18  -4   1  359.36   17.10
  18   4   1  370.76   25.00
 -18   4  -1  371.16   21.20
 -18   4  -1  354.56   23.10
  18   4   1  374.76   16.80
 -20  -4  -1  198.58   23.00
  20  -4   1  218.88   15.00
  20   4   1  213.88   21.90
 -20   4  -1  237.28   19.40
 -20   4  -1  216.68   21.20
  20   4   1  215.68   14.30
 -22  -4  -1   45.10   13.30
  22  -4   1   55.39   10.40
 -22   4  -1   40.30   14.20
  22   4   1   58.09   14.80
  22   4   1   43.70    8.20
  24  -4   1   33.00    9.20
  24   4   1   38.30    8.70
  24   4   1   33.10   14.40
 -24   4  -1   29.60   13.80
 -25  -5   1   79.39   16.90
  25  -5  -1  106.69   13.20
 -25   5   1  112.09   18.10
  25   5  -1  142.19   15.30
 -23  -5   1   43.10   13.30
  23  -5  -1   44.00    8.80
 -23   5   1   46.80   12.50
  23   5  -1   49.70    9.20
  21  -5  -1   -7.90    5.00
 -21  -5   1   -7.60    8.80
 -21   5   1   -6.90    7.40
  21   5  -1   -0.70    4.90
 -21   5   1   -8.20    5.80
  19  -5  -1  147.69   12.30
 -19  -5   1  150.58   19.60
 -19   5   1  168.58   16.20
 -19   5   1  130.59   15.60
  19   5  -1  129.29   11.40
  17  -5  -1  399.76   17.20
 -17  -5   1  422.36   27.70
  17   5  -1  412.66   17.10
 -17   5   1  403.46   22.90
 -17   5   1  459.25   23.10
 -15  -5   1  301.07   21.90
  15  -5  -1  273.97   13.30
 -15   5   1  286.17   18.10
 -15   5   1  316.37   18.70
  15   5  -1  282.77   13.20
  13  -5  -1   28.90    4.80
 -13  -5   1   28.30    7.80
  13   5  -1   36.90    5.10
 -13   5   1   38.60    7.00
 -13   5   1   40.20    7.60
  11  -5  -1   21.10    3.80
 -11  -5   1   16.00    6.50
 -11   5   1   16.60    4.80
 -11   5   1   13.50    4.70
  11   5  -1   22.70    3.80
   9  -5  -1  782.32   20.80
  -9  -5   1  750.72   30.30
  -9   5   1  792.22   26.80
  -9   5   1  764.62   24.90
   9   5  -1  796.92   20.70
   7  -5  -1 2938.21   59.59
  -7  -5   1 2949.60   72.09
  -7   5   1 2981.10   64.39
   7   5  -1 2990.40   59.89
  -7   5   1 3003.50   67.49
   5  -5  -1 3577.04   69.39
  -5  -5   1 3482.65   80.39
  -5   5   1 3658.03   77.09
   5   5  -1 3465.65   70.99
   5   5  -1 3630.14   70.59
  -5   5   1 3531.45   72.99
   3  -5  -1 2297.67   49.70
   3  -5  -1 2290.07   46.40
  -3  -5   1 2248.48   54.89
  -3   5   1 2302.77   52.79
   3   5  -1 2331.57   48.40
  -3   5   1 2279.67   48.90
   3   5  -1 2266.57   49.40
  -1  -5   1 1220.68   33.30
   1  -5  -1 1223.08   32.10
  -1   5   1 1265.07   29.00
   1   5  -1 1276.27   31.40
  -1   5   1 1214.68   32.30
   1   5  -1 1253.07   30.00
   1  -5   1  252.37   11.50
  -1  -5  -1  251.97   13.00
  -1   5  -1  256.67   11.20
   1   5   1  265.97    9.50
  -1   5  -1  248.78   11.80
   1   5   1  242.98   11.60
   3  -5   1  109.89    6.50
  -3  -5  -1  107.29    9.50
   3  -5   1  116.39    6.70
  -3   5  -1  110.39    8.40
   3   5   1  122.09    7.90
  -3   5  -1  115.89    8.10
   3   5   1  113.19    5.70
  -5  -5  -1   35.50    6.40
   5  -5   1   34.50    4.30
   5   5   1   36.40    3.60
  -5   5  -1   31.90    5.10
  -5   5  -1   27.60    4.60
   5   5   1   37.90    4.50
  -7  -5  -1 2045.00   54.99
   7  -5   1 1994.90   44.00
  -7   5  -1 2067.79   49.99
  -7   5  -1 2024.00   49.10
   7   5   1 2059.99   42.10
   9  -5   1  170.48    9.30
  -9  -5  -1  188.08   15.10
  -9   5  -1  181.78   12.60
   9   5   1  177.88    8.20
  -9   5  -1  191.98   12.60
 -11  -5  -1    6.70    5.50
  11  -5   1    2.80    3.40
 -11   5  -1    5.00    5.10
 -11   5  -1    8.80    3.90
  11   5   1    8.90    3.10
  13  -5   1  278.97   13.20
 -13  -5  -1  260.47   20.70
 -13   5  -1  300.87   18.10
 -13   5  -1  255.47   16.40
  13   5   1  273.97   12.00
 -15  -5  -1  677.83   34.00
  15  -5   1  649.64   22.30
  15   5   1  649.34   21.00
 -15   5  -1  689.23   28.90
 -15   5  -1  663.93   27.30
  17  -5   1  882.91   28.20
 -17  -5  -1  922.61   42.10
  17   5   1  897.81   27.20
 -17   5  -1  935.21   34.50
 -17   5  -1  870.61   35.40
 -19  -5  -1  658.23   37.50
  19  -5   1  622.34   24.10
 -19   5  -1  670.03   29.30
 -19   5  -1  622.44   31.50
  19   5   1  619.14   23.00
 -21  -5  -1  164.48   22.30
  21  -5   1  241.88   16.60
  21   5   1  220.38   15.10
 -21   5  -1  236.38   24.60
 -21   5  -1  252.97   23.50
 -23  -5  -1   47.40   14.40
  23  -5   1   50.09   10.40
 -23   5  -1   60.59   15.60
  23   5   1   35.70    8.20
  24  -6  -1   62.09   11.00
 -24  -6   1   55.39   15.70
 -24   6   1   79.09   16.60
  24   6  -1   70.79   10.80
  22  -6  -1   29.90    8.90
 -22  -6   1   15.60   11.50
  22   6  -1   28.60    7.50
 -22   6   1   37.50   12.60
 -22   6   1   27.90    9.60
  20  -6  -1   10.40    6.30
 -20  -6   1    6.20   10.80
 -20   6   1   23.10    9.50
 -20   6   1   22.20    9.00
  20   6  -1   12.80    5.70
 -18  -6   1  205.48   22.60
  18  -6  -1  201.08   13.70
 -18   6   1  222.48   18.80
  18   6  -1  194.38   13.00
 -18   6   1  219.38   19.20
 -16  -6   1  258.17   23.10
  16  -6  -1  271.27   14.40
 -16   6   1  254.87   18.90
 -16   6   1  271.07   19.40
  16   6  -1  272.87   13.70
  14  -6  -1   48.10    6.40
 -14  -6   1   48.80   10.70
  14   6  -1   49.10    6.30
 -14   6   1   44.90    8.00
 -14   6   1   56.19    9.30
 -12  -6   1   22.60    7.70
  12  -6  -1   22.50    4.50
  12   6  -1   12.90    4.00
 -12   6   1   16.40    5.50
 -12   6   1   25.10    6.40
 -10  -6   1   66.89   11.00
  10  -6  -1   71.49    6.60
  10   6  -1   64.19    6.30
 -10   6   1   69.29    8.60
 -10   6   1   53.39    8.10
  -8  -6   1  309.47   19.20
   8  -6  -1  309.67   11.70
  -8   6   1  324.57   15.10
  -8   6   1  298.37   16.50
   8   6  -1  284.07   11.50
  -6  -6   1 2001.30   54.79
   6  -6  -1 1991.90   43.10
   6   6  -1 2038.50   45.30
   6   6  -1 2039.80   44.20
  -6   6   1 2004.30   46.90
  -6   6   1 2019.10   50.99
   4  -6  -1 1735.23   40.90
   4  -6  -1 1779.02   38.40
  -4  -6   1 1747.43   47.80
   4   6  -1 1719.33   41.00
  -4   6   1 1724.23   45.10
   4   6  -1 1817.02   40.30
  -4   6   1 1773.42   41.20
   2  -6  -1 1058.09   29.60
  -2  -6   1 1038.20   32.00
  -2   6   1 1041.70   30.70
  -2   6   1 1043.10   26.90
   2   6  -1 1036.60   27.20
   2   6  -1 1012.80   28.50
   0  -6   1   66.29    7.30
   0  -6  -1   61.69    7.70
   0   6  -1   64.99    6.40
   0   6   1   55.59    7.30
   0   6  -1   56.29    6.80
   0   6   1   58.99    5.50
  -2  -6  -1  106.39   10.00
   2  -6   1  102.69    8.00
  -2   6  -1  102.29    9.00
   2   6   1  106.69    6.50
   2   6   1  102.69    8.50
  -2   6  -1  108.89    8.40
  -4  -6  -1  236.78   15.20
   4  -6   1  236.38   10.70
  -4   6  -1  244.88   13.70
   4   6   1  259.47   12.30
   4   6   1  262.77    9.70
  -4   6  -1  246.78   12.80
  -6  -6  -1  513.05   23.50
   6  -6   1  483.65   15.90
   6   6   1  452.25   15.60
  -6   6  -1  468.95   19.80
   6   6   1  476.35   14.00
  -6   6  -1  484.05   18.90
  -8  -6  -1 1147.79   39.80
   8  -6   1 1143.79   29.10
   8   6   1 1141.69   27.00
  -8   6  -1 1115.69   34.60
  -8   6  -1 1172.68   34.10
 -10  -6  -1   18.30    6.60
  10  -6   1   21.70    4.60
 -10   6  -1   22.50    6.40
 -10   6  -1   12.70    4.50
  10   6   1   19.70    3.80
  12  -6   1   78.39    8.40
 -12  -6  -1   78.89   12.40
  12   6   1   64.39    7.10
 -12   6  -1   81.29   11.00
 -12   6  -1   58.49    8.40
 -14  -6  -1  460.25   28.90
  14  -6   1  447.76   18.20
  14   6   1  421.46   16.40
 -14   6  -1  483.15   24.40
 -14   6  -1  457.45   23.50
  16  -6   1  371.56   17.70
 -16  -6  -1  402.66   28.90
  16   6   1  361.26   16.10
 -16   6  -1  396.66   22.80
 -16   6  -1  395.76   23.80
  18  -6   1  355.66   18.10
 -18  -6  -1  347.57   29.80
  18   6   1  336.67   16.30
 -18   6  -1  353.56   22.30
 -18   6  -1  354.96   24.20
  20  -6   1  247.48   16.90
 -20  -6  -1  211.18   26.60
 -20   6  -1  215.68   19.60
 -20   6  -1  251.57   23.40
  20   6   1  233.28   15.20
 -22  -6  -1   27.30   12.70
  22  -6   1   34.60    9.00
 -22   6  -1   27.10   12.10
  22   6   1   30.10    8.40
  24  -6   1  -10.90    7.10
  23  -7  -1   27.90    9.00
 -23  -7   1   26.80   13.90
  23   7  -1   33.30    8.10
 -23   7   1   30.40   13.00
 -23   7   1   28.30   13.90
 -21  -7   1   38.00   14.80
  21  -7  -1   45.00    9.10
 -21   7   1   50.99   10.90
 -21   7   1   38.60   12.40
  21   7  -1   46.70    8.70
  19  -7  -1   29.60    7.60
 -19  -7   1   28.30   12.10
 -19   7   1   16.30    7.90
  19   7  -1   25.00    6.40
 -19   7   1   30.10   10.10
  17  -7  -1    7.80    5.60
 -17  -7   1   17.50   10.30
  17   7  -1   14.20    5.10
 -17   7   1    3.00    6.50
 -17   7   1   25.90    9.20
 -15  -7   1   14.00    9.20
  15  -7  -1   34.30    6.10
 -15   7   1   24.80    7.80
  15   7  -1   28.70    5.60
 -15   7   1   41.10    8.80
 -13  -7   1   15.20    8.50
  13  -7  -1   20.30    4.80
 -13   7   1   12.80    5.80
  13   7  -1   16.00    4.50
 -13   7   1   15.40    6.80
 -11  -7   1   22.70    8.00
  11  -7  -1   28.40    5.10
 -11   7   1   21.50    6.30
 -11   7   1   25.20    6.90
  11   7  -1   25.30    5.00
  -9  -7   1   23.20    7.30
   9  -7  -1   20.00    4.20
   9   7  -1   15.70    4.00
  -9   7   1   15.90    5.50
  -9   7   1   21.40    5.70
  -7  -7   1   19.80    6.50
   7  -7  -1   32.40    4.70
   7   7  -1   24.20    4.50
  -7   7   1   18.40    5.30
  -7   7   1   30.90    5.70
   7   7  -1   29.90    4.90
   5  -7  -1   28.90    4.70
  -5  -7   1   31.00    6.80
   5  -7  -1   29.70    4.50
   5   7  -1   30.90    5.00
   5   7  -1   34.00    5.10
  -5   7   1   24.30    5.50
  -5   7   1   43.10    6.20
   3  -7  -1  158.68   10.50
  -3  -7   1  140.29   12.30
   3   7  -1  144.29    9.10
  -3   7   1  142.49    9.40
   3   7  -1  147.59   10.30
  -3   7   1  143.89   11.50
  -1  -7   1    3.30    3.60
   1  -7  -1    3.90    3.50
   1   7  -1    4.00    3.30
  -1   7   1   10.10    4.20
   1   7  -1    9.90    3.60
  -1   7   1    4.00    2.70
  -1  -7  -1  150.58   12.30
   1  -7   1  155.88   11.20
   1   7   1  150.88    8.60
  -1   7  -1  137.49   10.70
   1   7   1  137.19   11.20
  -1   7  -1  142.49    9.70
   3  -7   1   29.80    4.80
  -3  -7  -1   17.30    6.20
   3   7   1   21.70    5.00
  -3   7  -1   19.50    5.10
   3   7   1   26.40    4.20
  -5  -7  -1  486.45   23.90
   5  -7   1  486.25   16.90
  -5   7  -1  501.25   21.30
  -5   7  -1  467.45   19.20
   5   7   1  484.55   15.20
   5   7   1  454.85   17.90
   7  -7   1   11.60    3.80
  -7  -7  -1    6.80    5.40
   7   7   1    7.60    2.90
  -7   7  -1   11.60    5.10
  -7   7  -1    0.30    3.50
   7   7   1   13.30    3.10
  -9  -7  -1   49.20   10.00
   9  -7   1   83.79    8.20
  -9   7  -1   78.79    9.60
   9   7   1   70.89    6.60
  -9   7  -1   58.39    8.70
 -11  -7  -1   61.79   11.70
  11  -7   1   69.99    8.00
  11   7   1   64.99    6.80
 -11   7  -1   85.89   11.30
 -11   7  -1   71.49    9.90
  13  -7   1  198.88   12.80
 -13  -7  -1  196.18   21.50
  13   7   1  201.38   11.50
 -13   7  -1  206.78   17.40
 -13   7  -1  228.28   18.30
  15  -7   1   74.79    9.10
 -15  -7  -1   97.19   16.20
 -15   7  -1  112.59   14.70
 -15   7  -1   83.79   11.60
  15   7   1  103.89    9.60
  17  -7   1   23.30    6.60
 -17  -7  -1   36.40   12.60
  17   7   1   22.90    5.70
 -17   7  -1   35.70   10.60
 -17   7  -1   18.50    7.10
 -19  -7  -1   20.60   12.60
  19  -7   1   14.90    6.50
 -19   7  -1   20.70   10.10
  19   7   1   17.00    5.70
 -19   7  -1   19.30    8.20
 -21  -7  -1   14.80   11.70
  21  -7   1   -3.70    6.60
 -21   7  -1   10.40    7.80
 -21   7  -1    0.70   11.10
  23  -7   1   -6.50    6.80
 -23  -7  -1   14.40   12.10
 -23   7  -1  -22.60   10.40
 -22  -8   1   -1.10   11.50
  22  -8  -1    6.90    7.70
 -22   8   1    7.60    7.70
  22   8  -1   10.90    7.00
 -22   8   1   -6.10   11.00
 -20  -8   1  114.89   19.60
  20  -8  -1  108.69   12.20
 -20   8   1  167.68   19.60
 -20   8   1   90.39   15.50
  20   8  -1  118.89   12.50
  18  -8  -1  326.57   17.80
 -18  -8   1  335.37   29.50
 -18   8   1  353.66   24.60
 -18   8   1  320.97   23.90
  18   8  -1  303.87   16.70
  16  -8  -1  245.58   14.80
 -16  -8   1  264.47   25.70
 -16   8   1  264.07   21.80
  16   8  -1  239.88   14.00
 -16   8   1  221.28   19.70
 -14  -8   1  412.96   29.20
  14  -8  -1  429.86   17.80
 -14   8   1  409.16   25.30
 -14   8   1  406.16   23.10
  14   8  -1  413.36   17.40
  12  -8  -1   99.79    9.40
 -12  -8   1   74.19   13.30
 -12   8   1   89.39   11.40
 -12   8   1   74.49   10.90
  12   8  -1  104.89    9.30
 -10  -8   1   -1.70    6.50
  10  -8  -1   12.40    4.40
  10   8  -1    9.30    4.20
 -10   8   1   15.60    5.90
 -10   8   1    8.20    5.20
  -8  -8   1  226.28   19.30
   8  -8  -1  256.67   12.20
   8   8  -1  257.97   14.10
   8   8  -1  245.48   12.50
  -8   8   1  227.58   14.70
  -8   8   1  280.87   18.20
  -6  -8   1  324.67   20.60
   6  -8  -1  308.67   13.40
   6   8  -1  312.97   15.70
  -6   8   1  313.47   15.60
   6   8  -1  320.07   14.20
  -6   8   1  321.17   18.70
   4  -8  -1  275.17   14.30
  -4  -8   1  286.57   18.30
   4   8  -1  263.77   13.20
   4   8  -1  289.27   15.30
  -4   8   1  304.17   17.40
  -4   8   1  274.27   14.10
  -2  -8   1  134.59   12.30
   2  -8  -1  134.89   11.30
   2   8  -1  137.89   11.20
  -2   8   1  147.89   12.40
   2   8  -1  143.79    9.70
  -2   8   1  139.99    9.30
   0  -8   1   10.10    4.20
   0  -8  -1    5.90    4.00
   0   8  -1   10.30    3.90
   0   8   1    8.30    4.80
   0   8   1    7.70    3.30
   0   8  -1    6.00    3.70
  -2  -8  -1    8.20    5.10
   2  -8   1   12.60    4.20
  -2   8  -1   16.30    4.70
   2   8   1   14.90    3.80
  -2   8  -1    8.10    3.90
   2   8   1   12.40    5.00
  -4  -8  -1  998.40   36.90
   4  -8   1 1031.00   29.30
  -4   8  -1 1014.80   33.40
  -4   8  -1 1017.40   31.20
   4   8   1  995.40   31.60
   4   8   1  992.70   26.70
   6  -8   1  945.31   27.80
  -6  -8  -1  986.00   38.20
   6   8   1  966.20   29.50
  -6   8  -1  977.90   31.50
   6   8   1 1008.60   26.10
  -6   8  -1  996.20   33.80
   8  -8   1  887.91   26.30
  -8  -8  -1  842.32   36.90
   8   8   1  832.72   35.10
  -8   8  -1  827.42   30.10
   8   8   1  859.21   23.70
  -8   8  -1  888.81   32.40
 -10  -8  -1  180.48   20.20
  10  -8   1  184.08   12.30
 -10   8  -1  175.68   15.60
 -10   8  -1  189.78   16.30
  10   8   1  164.68   10.10
  12  -8   1   88.39    9.90
 -12  -8  -1   78.59   14.30
 -12   8  -1   99.79   13.20
 -12   8  -1   68.89   10.40
  12   8   1   88.89    8.40
  14  -8   1    3.90    4.90
 -14  -8  -1   -8.70    8.00
  14   8   1    3.40    3.80
 -14   8  -1   -0.50    5.60
 -14   8  -1    6.10    7.00
 -16  -8  -1   62.69   14.80
  16  -8   1   70.59    9.40
 -16   8  -1   73.39   12.70
  18  -8   1   59.69    9.60
 -18  -8  -1   54.09   14.50
 -18   8  -1   47.50   10.70
 -18   8  -1   67.19   13.70
  20  -8   1   83.29   11.60
 -20  -8  -1   70.79   16.80
 -20   8  -1   74.09   12.80
 -20   8  -1   64.79   15.20
 -22  -8  -1    0.40   10.90
  22  -8   1   -4.80    7.00
 -22   8  -1   -3.50   10.60
 -22   8  -1    2.80    7.20
  21  -9  -1   23.40    8.10
 -21  -9   1   26.20   14.40
 -21   9   1   23.50   10.10
 -21   9   1   12.80   10.40
 -19  -9   1   94.59   19.10
  19  -9  -1  127.99   13.80
 -19   9   1   93.39   13.70
 -19   9   1  106.49   16.00
 -17  -9   1  275.77   28.30
  17  -9  -1  275.97   16.90
  17   9  -1  251.77   15.40
 -17   9   1  268.37   22.50
 -17   9   1  308.17   23.90
  15  -9  -1  375.06   18.50
 -15  -9   1  406.46   30.40
 -15   9   1  433.86   26.70
  15   9  -1  415.96   18.40
 -15   9   1  429.66   24.80
  13  -9  -1  154.68   12.40
 -13  -9   1  137.39   18.90
  13   9  -1  139.49   11.20
 -13   9   1  132.09   16.40
 -13   9   1  137.39   14.80
 -11  -9   1   53.49   12.50
  11  -9  -1   44.30    7.20
 -11   9   1   39.60    9.00
 -11   9   1   41.80   10.20
  11   9  -1   43.40    6.80
   9  -9  -1  212.18   12.40
  -9  -9   1  198.98   20.30
   9   9  -1  199.38   12.20
  -9   9   1  216.68   15.40
  -9   9   1  209.68   17.70
   7  -9  -1  357.36   15.40
  -7  -9   1  383.36   24.40
   7   9  -1  305.97   15.30
  -7   9   1  361.56   21.10
  -7   9   1  355.76   17.90
   7   9  -1  369.56   18.50
  -5  -9   1  716.53   31.80
  -5   9   1  772.32   30.30
   5   9  -1  706.53   24.10
  -5   9   1  709.23   25.00
   5   9  -1  736.63   26.90
  -3  -9   1  533.35   26.20
   3  -9  -1  566.54   23.30
  -3   9   1  570.04   20.70
   3   9  -1  608.64   24.10
   3   9  -1  557.24   20.80
  -3   9   1  586.94   25.90
   1  -9  -1  144.39   13.30
  -1  -9   1  153.18   13.80
  -1   9   1  140.69   13.50
  -1   9   1  136.09   10.10
   1   9  -1  138.99   10.90
   1   9  -1  145.99   12.70
   1  -9   1   10.30    5.10
  -1  -9  -1    6.50    4.90
   1   9   1   14.70    5.60
  -1   9  -1    7.60    4.40
  -1   9  -1    9.90    5.00
   1   9   1   15.50    4.40
  -3  -9  -1  594.24   27.90
   3  -9   1  605.44   23.30
   3   9   1  563.34   19.90
   3   9   1  600.44   25.10
  -3   9  -1  576.14   22.60
  -3   9  -1  596.64   25.70
  -5  -9  -1  765.82   33.70
  -5   9  -1  749.42   27.50
   5   9   1  753.62   23.00
  -5   9  -1  770.12   30.10
   5   9   1  760.52   27.80
   7  -9   1  707.83   24.10
  -7  -9  -1  726.33   34.40
  -7   9  -1  744.83   30.10
   7   9   1  683.83   21.80
   7   9   1  766.92   29.90
  -7   9  -1  700.73   27.40
   9  -9   1  503.15   20.40
  -9  -9  -1  492.55   30.50
  -9   9  -1  469.65   24.80
  -9   9  -1  514.85   24.40
   9   9   1  466.15   17.40
 -11  -9  -1   21.40   11.30
  11  -9   1   29.40    6.70
 -11   9  -1   32.90    8.20
 -11   9  -1   30.00    8.70
 -13  -9  -1  -14.70    8.10
  13  -9   1   -1.10    4.60
 -13   9  -1   -1.60    5.80
 -13   9  -1   -2.70    6.40
  15  -9   1   91.09   11.10
 -15  -9  -1   72.39   16.10
 -15   9  -1   84.19   13.00
 -15   9  -1  113.09   15.10
  17  -9   1  323.27   19.10
 -17  -9  -1  333.07   30.90
 -17   9  -1  348.97   25.50
 -17   9  -1  373.36   25.90
  19  -9   1  110.79   13.20
 -19  -9  -1   94.79   19.10
 -19   9  -1   87.19   13.90
 -19   9  -1   95.39   16.60
  21  -9   1   37.60    9.30
 -21  -9  -1   31.40   14.50
 -21   9  -1   17.80    9.50
 -21   9  -1   43.30   13.90
 -20 -10   1    0.40   12.60
  20 -10  -1    7.20    7.20
 -20  10   1   11.40    9.70
 -20  10   1   15.30   10.80
 -18 -10   1   40.70   15.10
  18 -10  -1   36.50    8.20
 -18  10   1   32.40   10.60
 -18  10   1   50.99   12.10
 -16 -10   1   59.79   15.50
  16 -10  -1   75.59   10.10
 -16  10   1   62.29   12.10
 -16  10   1   57.19   11.40
 -14 -10   1  221.08   25.10
  14 -10  -1  183.48   14.20
 -14  10   1  219.08   20.60
  14  10  -1  214.08   21.80
 -14  10   1  178.58   18.10
  12 -10  -1   22.40    6.20
 -12 -10   1   22.20    9.80
 -12  10   1   31.70    9.50
 -12  10   1   19.30    8.70
  12  10  -1   25.00    6.10
  10 -10  -1    1.90    5.00
 -10 -10   1   13.30    8.20
 -10  10   1   -5.50    5.80
 -10  10   1    7.20    6.50
  -8 -10   1    0.80    6.30
  -8  10   1   -3.50    4.80
  -8  10   1   -6.60    6.00
   8  10  -1    1.20    4.50
  -6 -10   1   35.70    9.70
   6  10  -1   42.60    8.00
   6  10  -1   41.10    7.60
  -6  10   1   26.30    8.00
  -6  10   1   32.50    7.00
  -4 -10   1  108.29   14.30
  -4  10   1  151.58   15.70
  -4  10   1  141.39   11.60
   4  10  -1  126.49   12.10
   4  10  -1  141.49   14.00
  -2 -10   1   44.90   10.00
   2 -10  -1   59.59    9.20
   2  10  -1   62.99    8.90
   2  10  -1   50.79    8.80
  -2  10   1   59.29    9.40
  -2  10   1   56.39    7.80
   0 -10  -1   11.10    6.40
   0 -10   1   12.30    7.00
   0  10   1   21.00    7.00
   0  10  -1   23.00    6.70
   0  10   1   24.60    5.50
   0  10  -1   15.60    5.90
  -2 -10  -1   43.60   10.40
   2 -10   1   39.60    8.30
   2  10   1   35.70    6.50
  -2  10  -1   38.00    7.80
  -2  10  -1   25.00    7.00
   2  10   1   36.00    7.90
  -4 -10  -1   98.99   14.50
  -4  10  -1  109.99   14.00
   4  10   1  101.49   10.20
   4  10   1  120.99   13.90
  -4  10  -1  114.29   12.10
  -6 -10  -1   95.69   14.90
  -6  10  -1   81.89   11.30
   6  10   1  128.39   13.80
  -6  10  -1  128.89   13.30
  -8 -10  -1   59.09   13.00
  -8  10  -1   58.49   10.60
  -8  10  -1   75.39   11.00
 -10 -10  -1   -4.00    7.80
  10 -10   1    0.90    5.30
 -10  10  -1   -1.60    5.40
 -10  10  -1    0.50    5.90
 -12 -10  -1    8.60   10.00
  12 -10   1   14.90    6.90
 -12  10  -1   20.40    7.70
 -12  10  -1   18.90    8.20
 -14 -10  -1   96.59   17.80
  14 -10   1  101.09   11.70
 -14  10  -1  103.19   15.50
 -14  10  -1  151.08   18.80
 -16 -10  -1   83.69   18.60
  16 -10   1   46.70    9.50
 -16  10  -1   55.59   12.10
 -16  10  -1   74.49   14.40
  18 -10   1   40.20    9.70
 -18 -10  -1   19.60   13.80
 -18  10  -1   19.50    9.10
 -18  10  -1   33.60   12.10
  19 -11  -1   45.50    9.90
 -19 -11   1   61.59   17.30
 -19  11   1   53.79   13.60
 -19  11   1   51.69   13.30
  17 -11  -1   22.00    7.60
 -17 -11   1   28.10   13.70
 -17  11   1   36.50   11.00
 -17  11   1   35.30   10.70
  15 -11  -1   65.19    9.60
 -15 -11   1   67.39   15.90
 -15  11   1   82.49   14.30
 -15  11   1   78.09   13.00
 -13 -11   1   -5.70    7.90
  13 -11  -1   -2.00    5.30
 -13  11   1   15.30    7.80
 -13  11   1   -2.40    6.30
  11 -11  -1   -5.40    4.50
 -11 -11   1    0.60    8.10
 -11  11   1    3.20    7.00
 -11  11   1    0.00    5.90
  -9 -11   1    8.60    8.10
  -9  11   1    0.90    6.00
  -9  11   1   -7.80    6.20
  -7 -11   1  198.08   20.90
  -7  11   1  186.98   15.00
  -7  11   1  189.48   20.10
   7  11  -1  184.58   13.70
  -5 -11   1  109.69   15.10
  -5  11   1  145.59   12.50
  -5  11   1   89.19   12.90
   5  11  -1  108.29   11.80
   5  11  -1  140.99   14.60
  -3 -11   1    0.70    7.20
   3  11  -1    4.10    5.50
  -3  11   1   11.40    5.20
  -3  11   1    0.60    5.90
   3  11  -1    3.00    5.40
   1 -11  -1  234.68   19.00
  -1 -11   1  187.98   18.90
   1  11  -1  241.48   19.00
  -1  11   1  218.68   14.70
  -1  11   1  268.17   20.10
   1  11  -1  182.98   14.60
  -1 -11  -1   28.10    8.80
   1 -11   1   19.10    8.20
  -1  11  -1   24.50    7.20
  -1  11  -1   21.30    7.00
  -3 -11  -1   49.60   11.30
   3  11   1   40.20    9.10
  -3  11  -1   46.40    9.30
  -3  11  -1   59.89    9.20
  -5 -11  -1   54.09   12.30
  -5  11  -1   57.29    9.60
   5  11   1   45.70    9.30
  -5  11  -1   59.99   11.30
  -7 -11  -1   77.99   14.90
  -7  11  -1   83.49   11.40
  -7  11  -1   76.29   12.10
  -9 -11  -1  115.79   17.60
  -9  11  -1  110.89   13.70
  -9  11  -1  129.29   17.10
  11 -11   1   15.50    7.20
 -11 -11  -1   10.00    9.90
 -11  11  -1   17.70    8.50
 -11  11  -1   24.60    8.80
 -13 -11  -1   28.30   13.20
  13 -11   1   24.40    8.10
 -13  11  -1   20.80    9.30
 -13  11  -1   32.20   10.40
  15 -11   1   21.40    8.20
 -15 -11  -1   14.50   13.00
 -15  11  -1   12.60    9.30
 -15  11  -1   22.10    9.80
 -17 -11  -1    9.50   12.80
  17 -11   1   -2.10    6.70
 -17  11  -1    1.80    9.60
 -17  11  -1    2.50    9.90
  16 -12  -1  102.09   12.90
 -16 -12   1  121.19   21.00
 -16  12   1  110.29   16.10
 -16  12   1  108.79   17.40
  14 -12  -1  185.78   16.40
 -14 -12   1  152.18   21.70
 -14  12   1  190.28   20.50
 -14  12   1  120.69   17.20
 -12 -12   1   20.60   11.80
 -12  12   1    5.70    8.20
 -12  12   1    4.00    8.60
 -10 -12   1    3.20    9.70
 -10  12   1   -3.40    7.80
 -10  12   1    1.00    6.50
  -8 -12   1  344.57   27.70
  -8  12   1  300.77   24.20
  -8  12   1  294.87   18.90
  -6 -12   1  296.97   25.10
  -6  12   1  278.47   23.30
  -6  12   1  256.07   22.80
  -4 -12   1  482.35   29.30
   4  12  -1  488.65   25.90
  -4  12   1  520.35   29.60
  -2 -12   1    7.90    6.90
   2  12  -1   11.80    6.20
   2  12  -1   11.50    6.50
  -2  12   1   21.80    8.30
   0 -12  -1    7.90    7.10
   0  12  -1   10.50    6.70
   0  12   1    8.10    6.80
   0  12  -1    5.60    5.00
  -2 -12  -1   30.40    9.80
  -2  12  -1   20.20    7.50
  -2  12  -1   27.40    7.60
   2  12   1   17.70    8.10
  -4 -12  -1  370.06   26.50
  -4  12  -1  353.26   24.00
  -4  12  -1  322.57   19.80
   4  12   1  319.07   26.00
  -6 -12  -1  311.37   26.20
  -6  12  -1  307.07   23.20
  -6  12  -1  293.47   19.50
  -8 -12  -1  268.07   26.40
  -8  12  -1  271.47   19.80
  -8  12  -1  303.07   23.70
 -10 -12  -1  119.79   19.10
 -10  12  -1  101.79   14.70
 -10  12  -1  129.89   15.30
 -12 -12  -1   35.50   13.30
 -12  12  -1   26.10   11.00
 -12  12  -1   10.80   10.00
  14 -12   1    6.70    7.50
 -14 -12  -1    4.20   11.60
 -14  12  -1    6.90    9.10
 -14  12  -1    8.30    9.90
 -16 -12  -1   25.50   14.40
  16 -12   1   17.00    9.30
 -16  12  -1    9.10   10.80
 -16  12  -1   24.10   11.00
 -13 -13   1  134.29   21.70
 -13  13   1  199.28   25.10
 -11 -13   1   -3.30   10.40
 -11  13   1   19.90   10.90
  -9 -13   1   26.40   13.10
  -9  13   1   19.10   10.00
  -7 -13   1   36.00   12.60
  -7  13   1   25.90    9.60
  -5 -13   1  378.26   28.00
  -5  13   1  371.66   26.80
  -3 -13   1    0.20    6.70
   3  13  -1   11.60    7.00
  -3  13   1    3.10    6.90
   1  13  -1    6.50    6.50
  -1  13   1   11.70    8.00
  -1  13  -1  131.99   17.30
   1  13   1   91.09   13.80
  -3 -13  -1   45.00   11.90
  -3  13  -1   39.20    9.80
  -3  13  -1   41.40   10.70
   3  13   1   57.89   17.70
  -5 -13  -1  303.97   26.50
  -5  13  -1  342.47   24.60
  -5  13  -1  297.17   20.40
  -7 -13  -1  225.78   25.50
  -7  13  -1  293.67   24.10
  -7  13  -1  276.27   20.40
  -9 -13  -1  101.99   19.00
  -9  13  -1   78.29   13.70
  -9  13  -1   70.79   12.60
 -11 -13  -1   75.19   17.90
 -11  13  -1   65.29   12.70
 -11  13  -1   58.09   14.10
 -13 -13  -1   -3.90   12.00
 -13  13  -1    6.30    9.60
 -13  13  -1  -10.30    8.90
 -10 -14   1   10.80   12.40
 -10  14   1    3.10    8.50
  -8 -14   1    4.90   11.10
  -8  14   1   22.00   11.10
  -6 -14   1   -0.70    9.30
  -6  14   1    6.60    8.70
  -4 -14   1    2.50   10.10
  -4  14   1   17.90    8.80
   2  14  -1    2.20    8.10
  -2  14   1   -0.60    7.10
   0  14  -1   26.00    9.80
   0  14   1   20.40   10.10
  -2  14  -1   80.19   13.40
  -4 -14  -1   -2.10    9.00
  -4  14  -1    6.40    7.80
  -6 -14  -1  -15.40    8.00
  -6  14  -1   -1.70    7.70
  -8 -14  -1    5.70   11.50
  -8  14  -1    4.60    8.60
 -10 -14  -1   -1.70   12.00
 -10  14  -1    5.20    8.60
  -5  15   1   79.99   15.30
  -3  15   1   40.90   12.40
  -1  15   1   67.09   14.10
  -1  15  -1   25.50   10.10
  -3  15  -1   -3.50    8.00
  -5 -15  -1   27.20   20.00
  -5  15  -1   45.70   13.40
  24   0  -2  512.45   23.30
  22   0  -2  930.01   30.20
  20   0  -2 1107.09   32.00
  18   0  -2  824.42   25.60
 -18   0   2  881.11   30.00
 -16   0   2  325.77   16.50
  16   0  -2  303.37   13.40
 -14   0   2   10.30    3.00
  14   0  -2   15.30    3.70
 -14   0   2   13.40    4.10
  12   0  -2  720.13   19.30
 -12   0   2  726.53   22.80
 -12   0   2  704.33   19.00
 -10   0   2  828.62   23.10
  10   0  -2  804.12   19.80
 -10   0   2  772.02   19.50
   8   0  -2 1131.79   24.70
  -8   0   2 1115.29   24.70
  -8   0   2 1155.68   27.70
  -6   0   2  412.96   12.00
   6   0  -2  393.16   10.20
  -6   0   2  384.26   10.40
  -4   0   2 4276.77   76.89
  -4   0   2 3965.50   75.69
   4   0  -2 4083.09   75.49
  -2   0   2 1034.70   20.80
   0   0   2 5896.71  105.39
   0   0   2 5670.33  106.09
  -2   0  -2 6042.30  110.89
   2   0   2 6213.18  111.49
   2   0   2 5901.01  109.99
   2   0   2 5867.41  109.09
   4   0   2  939.41   20.10
   4   0   2  987.10   22.40
  -4   0  -2  955.70   20.90
   4   0   2  934.91   20.80
  -4   0  -2  964.00   22.90
   6   0   2  395.36   10.90
  -6   0  -2  394.56   13.60
   6   0   2  400.56   12.80
   6   0   2  391.46   11.50
  -6   0  -2  391.36   11.30
   8   0   2   92.49    5.40
  -8   0  -2   87.79    7.40
  -8   0  -2   87.99    5.50
   8   0   2   90.29    6.60
   8   0   2   89.79    5.80
  10   0   2  198.38    8.60
 -10   0  -2  180.58   11.40
 -10   0  -2  180.28    8.50
  10   0   2  201.58    9.40
  10   0   2  190.18   10.10
  12   0   2  439.86   17.00
 -12   0  -2  435.96   15.00
  12   0   2  466.35   15.20
 -12   0  -2  501.25   20.40
 -14   0  -2  189.68   14.20
  14   0   2  207.98   10.70
 -14   0  -2  188.08   10.40
  16   0   2  151.98   10.70
 -16   0  -2  139.19   14.00
 -16   0  -2  130.29   12.90
  18   0   2    0.80    4.60
  20   0   2  335.77   17.50
  22   0   2  264.07   17.30
  24   0   2  248.88   18.10
  27  -1  -2   69.99   11.60
  27   1  -2   54.99   18.30
  27   1  -2   70.89   11.60
  25  -1  -2   32.70    8.30
  25   1  -2    7.50    6.80
  25   1  -2   26.40   13.40
  23  -1  -2  808.72   28.80
  23   1  -2  821.22   28.60
  21  -1  -2  436.96   19.10
  21   1  -2  404.96   18.80
  19  -1  -2  672.73   23.00
 -19  -1   2  684.63   28.80
  19   1  -2  702.73   23.60
  17  -1  -2  617.64   20.40
 -17  -1   2  616.04   25.70
 -17   1   2  614.54   21.30
  17   1  -2  610.84   20.40
 -17   1   2  624.34   22.00
  15  -1  -2  108.49    8.30
 -15  -1   2  135.09   11.90
 -15   1   2  116.29    9.00
 -15   1   2  112.79    9.50
  15   1  -2  112.09    8.40
  13  -1  -2   11.30    3.10
 -13  -1   2   12.90    4.20
 -13   1   2    7.60    3.30
  13   1  -2   10.30    3.30
 -13   1   2   16.00    3.50
  11  -1  -2   57.09    5.00
 -11  -1   2   58.09    7.00
  11   1  -2   59.79    5.10
 -11   1   2   66.39    5.60
 -11   1   2   50.49    5.80
   9  -1  -2    9.50    2.10
  -9  -1   2   14.50    3.40
  -9   1   2    9.70    2.40
  -9   1   2   12.90    2.30
   9   1  -2   10.90    2.20
   7  -1  -2  118.99    5.10
  -7  -1   2  122.89    7.60
   7   1  -2  118.09    5.30
  -7   1   2  124.79    5.20
  -7   1   2  111.59    6.40
  -5  -1   2  177.08    8.20
   5  -1  -2  184.38    5.70
  -5   1   2  193.88    5.50
   5   1  -2  193.98    7.90
   5   1  -2  187.98    6.20
  -5   1   2  178.88    7.30
  -3  -1   2 2037.90   41.00
  -3  -1   2 2059.49   38.50
   3  -1  -2 1992.80   37.60
   3   1  -2 2039.00   38.80
  -3   1   2 1928.01   40.00
  -3   1   2 2079.19   38.10
  -1  -1   2 1253.77   24.20
  -1  -1   2 1254.37   24.80
  -1   1   2 1051.39   23.30
   1   1  -2 1195.18   23.60
  -1   1   2 1201.68   24.50
   1   1  -2 1171.48   24.30
   1  -1   2 3228.08   58.29
  -1  -1  -2 3129.89   60.99
   1  -1   2 3019.80   58.39
   1  -1   2 3235.78   60.89
  -1   1  -2 3094.49   59.19
   1   1   2 3087.39   59.19
   1   1   2 3124.99   59.09
  -1   1  -2 3150.98   60.19
   3  -1   2 9999.00  174.88
   3  -1   2 9920.31  178.68
  -3  -1  -2 9781.52  179.28
   3  -1   2 9520.35  175.28
   3   1   2 9589.44  175.98
  -3   1  -2 9296.17  176.18
  -3   1  -2 9727.03  177.98
   3   1   2 9460.35  173.98
   3   1   2 9654.53  176.48
   5  -1   2 3261.17   62.19
  -5  -1  -2 3288.07   67.89
   5  -1   2 3297.17   62.99
   5  -1   2 3291.87   66.59
   5   1   2 3348.26   63.99
  -5   1  -2 3322.77   66.49
   5   1   2 3284.87   62.09
  -5   1  -2 3339.97   64.49
  -5   1  -2 3177.98   63.99
   5   1   2 3319.77   64.49
   7  -1   2 1075.99   27.80
   7  -1   2 1073.09   23.90
   7  -1   2 1092.19   24.60
  -7  -1  -2 1087.49   23.90
  -7  -1  -2 1104.09   29.90
  -7   1  -2 1051.69   25.50
   7   1   2 1094.49   26.20
   7   1   2 1072.89   25.30
  -7   1  -2 1084.69   26.40
   7   1   2 1108.29   23.90
   9  -1   2   80.99    7.60
   9  -1   2   80.29    6.00
   9  -1   2   93.99    6.00
  -9  -1  -2   87.99    8.90
  -9  -1  -2   92.89    5.50
   9   1   2   94.29    5.80
   9   1   2   93.09    6.50
  -9   1  -2   64.69    7.40
  -9   1  -2   87.49    6.30
   9   1   2   88.29    6.90
 -11  -1  -2  127.69   10.90
  11  -1   2  107.29    7.00
  11  -1   2  100.39    7.00
 -11  -1  -2  107.39    6.50
 -11   1  -2  103.39    7.60
  11   1   2  112.69    8.20
  11   1   2  101.29    7.50
 -11   1  -2  106.69    9.00
  11   1   2  107.39    7.00
 -13  -1  -2   27.30    6.40
 -13  -1  -2   21.60    3.50
  13  -1   2   24.90    4.40
  13   1   2   21.40    4.40
  13   1   2   24.80    4.50
 -13   1  -2   19.30    3.90
 -13   1  -2   18.40    4.90
 -15  -1  -2   13.00    6.00
  15  -1   2   24.30    5.00
 -15   1  -2   19.60    5.40
  15   1   2   18.50    4.70
 -15   1  -2   13.70    4.40
  17  -1   2   -2.70    4.40
 -17  -1  -2  -10.70    5.40
  17   1   2    5.60    4.60
 -17   1  -2    1.30    4.90
  19  -1   2   87.09   10.40
 -19  -1  -2   78.59   13.40
  19   1   2   80.09    9.50
  21  -1   2  209.48   15.60
  21   1   2  230.98   15.60
  23  -1   2  224.98   17.60
  23   1   2  258.27   17.30
  25  -1   2   70.99   11.90
  25   1   2   73.09   11.30
  25   1   2   97.39   21.20
  26  -2  -2    3.00    7.00
  26   2  -2   -5.70    6.60
  26   2  -2   -1.30   11.20
  24  -2  -2   -3.60    5.70
  24   2  -2    2.00    6.20
  24   2  -2    6.90   12.60
 -22  -2   2   83.99   14.30
  22  -2  -2  137.09   12.70
  22   2  -2  118.29   12.30
  22   2  -2  151.78   20.70
 -20  -2   2   38.60    9.50
  20  -2  -2   46.10    7.30
  20   2  -2   38.00    7.20
  20   2  -2   53.69   12.50
 -18  -2   2   57.99   10.40
  18  -2  -2   51.89    7.10
  18   2  -2   53.39    7.30
  18   2  -2   95.29   14.50
 -18   2   2   52.19    7.50
 -16  -2   2  122.79   13.20
  16  -2  -2  121.09    9.10
  16   2  -2  105.79   13.10
 -16   2   2  108.09   11.00
  16   2  -2  122.89    9.10
  14  -2  -2  201.88   10.20
 -14  -2   2  220.38   15.40
  14   2  -2  216.68   10.40
 -14   2   2  200.98   12.70
  14   2  -2  229.88   15.50
  12  -2  -2  187.78    8.80
 -12  -2   2  196.88   13.40
  12   2  -2  192.88    9.00
  12   2  -2  174.38   12.60
 -12   2   2  183.28   11.20
  10  -2  -2  640.94   17.00
 -10  -2   2  648.04   23.40
  10   2  -2  628.04   21.80
 -10   2   2  644.94   20.10
  10   2  -2  658.73   17.30
   8  -2  -2  948.31   21.70
  -8  -2   2  959.10   28.30
   8   2  -2  981.90   26.60
  -8   2   2  939.41   25.00
   8   2  -2  982.90   22.30
  -6  -2   2  342.47   13.80
   6  -2  -2  322.77    9.10
  -6   2   2  325.47   12.10
   6   2  -2  334.57    9.70
   4  -2  -2 6504.45  118.59
  -4  -2   2 6621.54  125.19
  -4   2   2 6181.98  122.69
  -4   2   2 6736.73  118.09
   4   2  -2 6558.04  120.09
  -2  -2   2    3.10    1.60
   2  -2  -2    3.60    0.80
  -2   2   2    4.80    1.80
   2   2  -2    4.50    1.40
  -2   2   2    3.90    1.10
   0  -2   2    9.80    1.70
   0  -2  -2   12.60    2.40
   0  -2   2   12.10    2.20
   0   2  -2   14.50    2.50
   0   2   2    8.30    1.70
   0   2   2    6.10    1.70
   0   2  -2    8.40    1.60
   2  -2   2  505.65   12.90
   2  -2   2  530.25   15.50
   2  -2   2  530.45   11.80
  -2  -2  -2  507.65   15.60
   2   2   2  492.65   12.90
  -2   2  -2  502.55   14.50
   2   2   2  506.85   10.60
  -2   2  -2  516.65   13.80
   2   2   2  515.15   13.60
   4  -2   2  158.68    5.20
   4  -2   2  162.98    6.40
   4  -2   2  148.29    8.30
  -4  -2  -2  167.58    9.10
  -4   2  -2  150.98    7.90
   4   2   2  162.28    7.20
   4   2   2  141.89    7.80
   4   2   2  144.49    6.20
   4   2   2  158.78    5.10
   6  -2   2  264.67    9.10
   6  -2   2  257.87   12.00
  -6  -2  -2  283.97   13.20
   6  -2   2  257.47    7.50
  -6   2  -2  240.58   10.00
   6   2   2  253.97    8.90
   6   2   2  255.37    7.90
  -6   2  -2  267.07   11.60
  -6   2  -2  254.87    8.90
   6   2   2  261.37   10.40
   6   2   2  267.57   11.80
  -8  -2  -2   74.49    8.90
   8  -2   2   66.69    7.90
   8  -2   2   84.39    5.70
   8  -2   2   76.89    4.60
   8   2   2   79.89    5.10
   8   2   2   96.79    5.90
  -8   2  -2   81.99    6.00
  -8   2  -2   75.39    6.50
   8   2   2   86.69    8.40
  -8   2  -2   85.09    8.00
   8   2   2   80.49    7.00
  10  -2   2 1651.23   36.80
  10  -2   2 1625.04   34.90
 -10  -2  -2 1599.04   34.30
 -10  -2  -2 1617.34   45.20
  10   2   2 1613.74   39.80
 -10   2  -2 1618.64   39.00
 -10   2  -2 1679.83   38.30
  10   2   2 1660.43   43.50
  10   2   2 1685.73   35.90
 -12  -2  -2  176.48   14.60
  12  -2   2  220.48   10.50
  12   2   2  197.28    9.80
 -12   2  -2  185.28   11.30
 -12   2  -2  206.88   11.80
  14  -2   2  388.66   15.30
 -14  -2  -2  358.36   21.30
 -14   2  -2  390.96   17.30
 -14   2  -2  392.76   17.00
  14   2   2  402.46   14.90
  16  -2   2   70.19    8.40
 -16  -2  -2   61.49   10.80
 -16   2  -2   57.49    7.80
  16   2   2   56.29   12.70
 -18  -2  -2   -4.10    6.80
  18  -2   2   -1.50    5.10
  18   2   2    5.60    4.50
 -18   2  -2    0.60    4.60
  18   2   2    2.40    8.60
 -20  -2  -2   21.90    9.50
  20  -2   2   26.90    7.80
  20   2   2   43.10   13.50
  20   2   2   39.50    7.50
  22  -2   2   67.79   10.90
 -22   2  -2   91.79   16.30
  22   2   2   74.19   10.20
  22   2   2   78.39   17.30
  24  -2   2   11.30    8.60
 -24   2  -2   19.90   12.90
  24   2   2   14.20    7.70
  24   2   2    1.50   13.30
  27  -3  -2   -6.70    7.40
  27   3  -2    8.30   13.30
  27   3  -2    7.20    7.30
  25  -3  -2    9.30    7.40
  25   3  -2    9.70    7.00
  25   3  -2  -12.20   10.80
 -23  -3   2   15.50    9.40
  23  -3  -2   19.20    7.10
  23   3  -2   12.20   12.20
  23   3  -2   16.50    6.70
 -21  -3   2  101.39   14.70
  21  -3  -2  140.69   12.40
  21   3  -2  122.19   17.80
  21   3  -2  110.09   11.70
  19  -3  -2  121.59   10.80
 -19  -3   2   92.89   13.20
 -19   3   2  133.39   14.00
  19   3  -2  129.79   16.50
  19   3  -2  124.79   10.60
 -17  -3   2   10.70    6.80
  17  -3  -2    6.70    3.90
 -17   3   2    3.80    4.90
  17   3  -2   15.80    4.70
  17   3  -2    9.20    7.00
  15  -3  -2   74.19    7.60
 -15  -3   2   66.39   10.30
  15   3  -2   77.29    7.40
 -15   3   2   64.79    8.30
  15   3  -2   97.49   12.70
 -13  -3   2  620.54   26.10
  13  -3  -2  564.24   17.60
  13   3  -2  589.24   17.90
 -13   3   2  590.54   21.90
  13   3  -2  575.94   23.70
 -11  -3   2  530.55   22.90
  11  -3  -2  508.15   15.50
  11   3  -2  515.15   15.60
  11   3  -2  543.45   20.80
 -11   3   2  539.35   19.90
   9  -3  -2 3529.85   69.49
  -9  -3   2 3573.64   80.19
  -9   3   2 3548.94   75.29
   9   3  -2 3622.34   70.09
   7  -3  -2 2926.51   56.99
  -7  -3   2 2952.10   66.59
   7   3  -2 2983.70   57.79
  -7   3   2 2888.71   62.49
  -5  -3   2 5236.28  106.69
   5  -3  -2 5315.87   97.99
   5   3  -2 5431.36   99.69
  -5   3   2 5214.48  103.89
   3  -3  -2   91.49    3.70
  -3  -3   2   96.29    7.00
   3  -3  -2   94.69    5.00
  -3   3   2   94.19    4.10
  -3   3   2  122.09    7.40
   3   3  -2   89.49    4.60
  -3   3   2   93.39    4.80
   3   3  -2   97.29    5.50
  -1  -3   2 4560.14   87.19
   1  -3  -2 4486.95   86.39
  -1   3   2 4472.95   83.79
   1   3  -2 4496.55   85.99
   1   3  -2 4379.56   84.79
  -1   3   2 4387.46   86.89
   1  -3   2 2143.59   41.50
  -1  -3  -2 2072.19   45.20
   1  -3   2 1974.60   44.80
   1   3   2 2036.00   42.50
   1   3   2 2064.49   42.10
  -1   3  -2 2079.59   43.80
  -1   3  -2 1973.70   42.60
   3  -3   2 2212.68   41.70
  -3  -3  -2 2141.59   49.20
   3  -3   2 2122.99   48.30
   3  -3   2 2170.18   44.00
   3   3   2 2170.18   45.50
   3   3   2 2148.89   43.70
  -3   3  -2 2136.19   46.70
   3   3   2 2226.68   41.00
  -3   3  -2 2145.79   45.90
   5  -3   2  230.88    8.60
  -5  -3  -2  228.88   12.40
  -5   3  -2  214.88   10.70
   5   3   2  241.78   10.20
   5   3   2  229.78    7.00
  -5   3  -2  225.68   10.00
   5   3   2  229.08    8.10
   7  -3   2   10.00    2.80
  -7  -3  -2    2.60    3.30
  -7   3  -2    5.60    2.40
  -7   3  -2   11.40    4.00
   7   3   2    9.30    2.00
   7   3   2    3.50    2.30
  -9  -3  -2 1176.78   37.20
   9  -3   2 1237.58   29.30
   9   3   2 1233.78   27.50
  -9   3  -2 1190.58   31.90
   9   3   2 1237.08   34.90
  -9   3  -2 1234.68   34.30
   9   3   2 1229.78   32.60
  11  -3   2 1379.76   33.40
 -11  -3  -2 1425.46   43.80
 -11   3  -2 1405.86   37.10
  11   3   2 1435.56   40.80
 -11   3  -2 1390.46   39.40
  11   3   2 1397.66   32.10
 -13  -3  -2 1072.19   38.90
  13  -3   2 1053.29   28.60
  13   3   2 1087.89   27.70
 -13   3  -2 1079.09   35.00
  13   3   2 1082.29   36.60
 -13   3  -2 1124.99   32.70
  15  -3   2  515.25   19.00
 -15  -3  -2  536.85   28.00
 -15   3  -2  523.75   24.80
  15   3   2  527.85   26.50
  15   3   2  519.85   18.20
 -15   3  -2  549.05   22.40
  17  -3   2   15.20    6.20
 -17  -3  -2   12.70    8.70
 -17   3  -2    5.80    7.90
 -17   3  -2   12.20    5.10
  17   3   2   17.50   10.00
  17   3   2   14.40    5.00
  19  -3   2  103.59   11.40
 -19  -3  -2   68.29   13.40
  19   3   2   99.69   10.60
 -19   3  -2   69.49   13.00
  19   3   2   94.69   15.70
 -19   3  -2   78.29   11.60
  21  -3   2   -5.00    5.90
 -21  -3  -2    7.70    9.00
 -21   3  -2   -4.00    9.10
  21   3   2    6.70    5.70
  21   3   2    6.70   11.60
  23  -3   2   10.00    7.30
  23   3   2   20.80    7.00
  23   3   2   15.60   13.10
 -23   3  -2    8.60   10.90
  25  -3   2   24.00    9.10
  25   3   2   24.00    8.20
  25   3   2   22.40   15.90
  26  -4  -2   -5.90    7.00
  26   4  -2    0.10    7.20
 -24  -4   2    7.00   10.60
  24  -4  -2    7.80    7.50
  24   4  -2    7.50    6.60
 -22  -4   2   75.39   14.80
  22  -4  -2   83.49   10.60
  22   4  -2  109.29   12.20
  22   4  -2   95.99   17.10
  20  -4  -2  279.27   15.60
 -20  -4   2  262.97   22.60
 -20   4   2  250.87   18.30
  20   4  -2  270.87   14.90
  20   4  -2  253.67   21.40
 -18  -4   2   27.00    9.00
  18  -4  -2   36.60    6.40
  18   4  -2   31.60    6.00
 -18   4   2   32.80    7.90
  16  -4  -2   29.90    5.40
 -16  -4   2   40.70    9.90
 -16   4   2   29.50    7.20
  16   4  -2   43.90    6.00
  14  -4  -2  605.14   19.00
 -14  -4   2  608.74   28.30
 -14   4   2  595.14   23.90
  14   4  -2  589.74   18.70
 -12  -4   2  558.54   25.60
  12  -4  -2  574.74   17.30
  12   4  -2  567.34   17.30
 -12   4   2  557.24   22.10
 -10  -4   2 2070.09   55.99
  10  -4  -2 2080.39   44.50
  10   4  -2 2135.39   45.10
 -10   4   2 2167.58   51.79
   8  -4  -2 1646.04   35.00
  -8  -4   2 1596.24   45.10
  -8   4   2 1676.53   39.20
  -8   4   2 1634.74   41.50
   8   4  -2 1671.53   35.80
  -6  -4   2 2730.73   63.79
   6  -4  -2 2733.13   53.29
  -6   4   2 2772.92   56.89
   6   4  -2 2737.33   54.99
  -6   4   2 2639.94   59.99
  -4  -4   2    7.00    2.90
   4  -4  -2    5.90    1.60
   4  -4  -2    7.60    2.10
  -4   4   2    4.90    2.10
  -4   4   2    8.00    2.90
   4   4  -2    7.50    2.40
  -4   4   2    7.00    1.60
   4   4  -2    6.60    1.80
  -2  -4   2 1193.78   30.80
   2  -4  -2 1109.19   23.80
   2  -4  -2 1165.68   28.10
   2   4  -2 1177.58   27.80
   2   4  -2 1150.28   27.10
  -2   4   2 1147.29   29.80
  -2   4   2 1174.68   25.70
  -2   4   2 1153.88   25.50
   0  -4  -2 1398.56   34.00
   0  -4   2 1378.06   32.70
   0   4   2 1384.46   33.20
   0   4  -2 1381.26   32.50
   0   4   2 1434.56   28.70
   0   4   2 1328.97   30.50
   0   4  -2 1373.86   32.00
   2  -4   2 1366.46   29.40
   2  -4   2 1297.27   29.80
  -2  -4  -2 1356.26   35.10
   2   4   2 1332.17   31.10
  -2   4  -2 1340.67   32.50
   2   4   2 1358.06   26.80
   2   4   2 1296.87   30.80
  -2   4  -2 1314.17   31.90
  -4  -4  -2  788.22   25.90
   4  -4   2  792.12   20.30
  -4   4  -2  795.22   23.10
   4   4   2  814.72   17.50
  -4   4  -2  795.42   22.80
   4   4   2  767.32   19.90
   4   4   2  784.72   22.10
   6  -4   2   19.40    3.30
  -6  -4  -2   15.10    4.70
   6   4   2   17.20    4.00
  -6   4  -2   17.70    3.80
  -6   4  -2   17.50    4.20
   6   4   2   18.00    2.70
   6   4   2   21.60    2.50
  -8  -4  -2  193.08   14.20
   8  -4   2  203.58    9.50
  -8   4  -2  205.28   12.40
   8   4   2  197.48    7.90
  -8   4  -2  200.98   11.70
 -10  -4  -2 1283.87   41.60
  10  -4   2 1233.28   31.00
  10   4   2 1282.47   29.30
 -10   4  -2 1306.57   37.20
 -10   4  -2 1251.07   35.20
  12  -4   2 1302.27   33.40
 -12  -4  -2 1351.36   45.00
 -12   4  -2 1336.57   38.10
 -12   4  -2 1323.27   39.80
  12   4   2 1307.27   31.20
 -14  -4  -2  419.06   25.30
  14  -4   2  404.86   16.40
 -14   4  -2  390.96   21.10
  14   4   2  398.76   22.40
 -14   4  -2  390.46   19.50
  14   4   2  407.16   15.30
  16  -4   2   92.89   10.20
 -16  -4  -2   82.39   14.80
  16   4   2   86.99   14.20
  16   4   2  104.09    9.50
 -16   4  -2   71.69   11.90
 -16   4  -2  106.29   12.60
  18  -4   2   12.50    5.60
 -18  -4  -2    3.80    9.00
  18   4   2   18.70    6.20
  18   4   2    6.00    9.90
 -18   4  -2   13.20    8.70
 -18   4  -2   11.30    5.80
  20  -4   2   -1.70    6.00
 -20  -4  -2   -0.90    9.30
  20   4   2   -0.10   10.50
 -20   4  -2   -7.80    8.70
  20   4   2    5.90    5.40
 -22  -4  -2   28.20   12.80
  22  -4   2   15.20    7.50
 -22   4  -2   16.30   12.00
  22   4   2    6.10   11.90
  22   4   2   16.80    6.50
 -24   4  -2   30.90   14.70
  24   4   2   36.30   16.10
  24   4   2   47.10    9.00
 -25  -5   2    5.50   11.40
  25  -5  -2    3.40    7.70
 -25   5   2   19.10   11.90
  25   5  -2    4.80    7.00
 -23  -5   2    5.00   11.00
  23  -5  -2    7.00    7.10
 -23   5   2   16.80   10.10
  23   5  -2    3.10    5.90
  21  -5  -2   23.90    6.80
 -21  -5   2   22.90   10.90
 -21   5   2   11.70    7.30
  21   5  -2   26.00    6.60
 -21   5   2   32.90    9.70
 -19  -5   2   41.90   11.90
  19  -5  -2   52.69    8.40
  19   5  -2   50.19    7.60
 -19   5   2   43.40    8.90
  17  -5  -2   29.30    6.10
 -17  -5   2   34.00   10.60
  17   5  -2   43.80    6.90
 -17   5   2   35.10    8.30
  15  -5  -2   65.69    7.20
 -15  -5   2   58.09   11.00
 -15   5   2   57.89    9.50
 -15   5   2   67.19    9.60
  15   5  -2   70.79    7.40
 -13  -5   2   23.20    7.20
  13  -5  -2   26.00    4.60
  13   5  -2   28.10    4.50
 -13   5   2   21.30    5.80
 -13   5   2   25.10    6.00
 -11  -5   2   26.60    6.60
  11  -5  -2   13.80    3.30
 -11   5   2   12.60    4.10
  11   5  -2   15.10    3.40
 -11   5   2   22.00    5.20
  -9  -5   2  216.08   15.50
   9  -5  -2  211.48    9.10
  -9   5   2  223.48   12.00
  -9   5   2  219.38   13.70
   9   5  -2  209.28    9.40
   7  -5  -2  129.09    6.80
  -7  -5   2  140.99   12.40
  -7   5   2  117.49   10.40
  -7   5   2  142.39    9.20
   7   5  -2  125.09    7.50
   5  -5  -2  167.48    7.90
   5  -5  -2  154.68    6.80
  -5  -5   2  168.28   12.20
   5   5  -2  145.99    8.10
  -5   5   2  154.08    8.70
   5   5  -2  156.58    8.00
  -5   5   2  136.79   10.60
   3  -5  -2  110.79    5.60
  -3  -5   2  109.79    9.40
   3  -5  -2  115.39    7.60
  -3   5   2  114.29    6.10
   3   5  -2  114.99    7.40
  -3   5   2  110.39    6.80
  -3   5   2  108.59    9.10
   3   5  -2  119.89    7.40
  -1  -5   2   70.79    7.10
   1  -5  -2   67.99    6.80
  -1   5   2   72.59    5.00
   1   5  -2   65.89    6.00
   1   5  -2   63.79    6.00
  -1   5   2   65.19    7.00
  -1   5   2   71.29    5.40
   1  -5   2  267.27   11.30
  -1  -5  -2  253.17   13.20
   1   5   2  250.77    8.50
   1   5   2  253.97   10.70
   1   5   2  261.57   12.20
  -1   5  -2  252.77   11.70
  -1   5  -2  261.77   11.90
  -3  -5  -2  358.96   16.80
   3  -5   2  335.37   12.20
   3  -5   2  342.37   11.30
   3   5   2  322.97   13.20
   3   5   2  334.17   12.90
  -3   5  -2  324.17   14.10
  -3   5  -2  339.27   14.30
   3   5   2  333.17    9.60
   5  -5   2   68.49    5.90
  -5  -5  -2   72.49    9.10
   5   5   2   67.59    5.70
   5   5   2   71.79    4.30
  -5   5  -2   58.39    6.80
   5   5   2   72.29    7.10
  -5   5  -2   73.49    7.70
   7  -5   2    7.90    3.00
  -7  -5  -2    6.60    4.40
   7   5   2    8.00    2.20
  -7   5  -2    6.90    3.40
  -7   5  -2    6.70    3.90
   7   5   2    7.30    2.20
  -9  -5  -2   52.79    9.30
   9  -5   2   60.49    6.30
  -9   5  -2   57.39    8.30
   9   5   2   64.89    5.30
  -9   5  -2   46.50    6.60
 -11  -5  -2  186.08   16.70
  11  -5   2  145.19    9.90
 -11   5  -2  177.38   14.10
 -11   5  -2  182.68   13.00
  11   5   2  164.08    8.50
 -13  -5  -2    4.70    6.10
  13  -5   2    6.30    4.00
  13   5   2    4.80    3.20
 -13   5  -2    3.20    4.30
 -13   5  -2   17.60    6.70
 -15  -5  -2   19.00   10.30
  15  -5   2    5.60    4.50
 -15   5  -2   18.00    7.80
  15   5   2   10.10    4.30
 -15   5  -2    3.10    4.70
  17  -5   2    5.00    5.60
 -17  -5  -2   -5.30    8.40
 -17   5  -2    5.60    8.70
  17   5   2    4.30    4.70
 -17   5  -2    4.20    5.90
  19  -5   2   -2.80    5.70
 -19  -5  -2   -9.80    8.30
  19   5   2    6.10    5.50
 -19   5  -2   -1.60    9.30
 -19   5  -2    3.50    6.50
 -21  -5  -2   23.40   13.90
  21  -5   2   31.10    8.70
  21   5   2   32.40    7.50
 -21   5  -2   26.80   12.50
  23  -5   2    1.00    7.20
 -23  -5  -2    5.70   11.30
 -23   5  -2    2.30   12.30
  23   5   2    5.10    6.30
  24  -6  -2   33.90    9.50
 -24  -6   2   20.50   12.50
  24   6  -2   37.20    8.50
 -24   6   2   33.60   13.00
 -22  -6   2   25.10   12.60
  22  -6  -2   53.19    9.90
 -22   6   2   56.69   13.50
 -22   6   2   35.10   10.00
  22   6  -2   44.00    8.00
  20  -6  -2   28.70    6.90
 -20  -6   2   23.30   11.20
 -20   6   2   35.60   10.00
  20   6  -2   29.40    6.90
 -20   6   2   27.50    8.60
  18  -6  -2   26.00    6.20
 -18  -6   2   16.90    9.70
 -18   6   2   21.10    7.60
  18   6  -2   24.70    6.10
 -18   6   2   27.00    8.40
  16  -6  -2    2.30    3.90
 -16  -6   2    6.60    8.20
 -16   6   2   -2.80    4.90
 -16   6   2   -3.80    5.10
  16   6  -2   13.30    4.50
  14  -6  -2  214.18   11.50
 -14  -6   2  221.08   19.70
 -14   6   2  247.28   16.40
  14   6  -2  229.98   12.00
 -14   6   2  230.48   17.10
  12  -6  -2  372.06   14.20
 -12  -6   2  336.57   22.20
 -12   6   2  387.86   18.60
  12   6  -2  375.86   14.60
 -12   6   2  390.06   20.40
  10  -6  -2  708.93   20.00
 -10  -6   2  693.63   30.30
 -10   6   2  712.23   24.40
 -10   6   2  740.13   27.50
  10   6  -2  718.43   20.80
  -8  -6   2  505.35   24.20
   8  -6  -2  506.45   15.20
  -8   6   2  489.15   21.40
   8   6  -2  478.85   16.20
  -8   6   2  512.35   18.80
  -6  -6   2  375.46   20.00
   6  -6  -2  409.96   12.80
  -6   6   2  408.46   15.30
   6   6  -2  393.26   14.50
   6   6  -2  396.46   14.60
  -6   6   2  406.96   18.80
   4  -6  -2  102.99    6.30
  -4  -6   2   93.99   10.10
   4  -6  -2  103.29    7.90
   4   6  -2  108.19    7.80
  -4   6   2  103.99   10.30
  -4   6   2  100.39    7.50
   4   6  -2  101.89    7.70
  -2  -6   2    2.60    3.00
   2  -6  -2    2.90    3.00
  -2   6   2   -1.60    3.30
  -2   6   2    4.00    2.80
   2   6  -2   12.10    3.60
   2   6  -2    8.10    2.80
   0  -6   2  463.45   18.00
   0  -6  -2  449.16   18.90
   0   6   2  432.56   18.00
   0   6  -2  461.15   17.30
   0   6   2  435.46   13.90
   0   6  -2  456.15   16.70
  -2  -6  -2  892.31   30.00
   2  -6   2  903.61   25.30
  -2   6  -2  898.01   26.70
   2   6   2  914.21   21.80
   2   6   2  882.01   26.60
  -2   6  -2  889.31   27.20
  -4  -6  -2  147.09   12.60
   4  -6   2  136.19    8.80
   4  -6   2  143.59    7.40
  -4   6  -2  136.59   10.30
   4   6   2  142.49    6.50
  -4   6  -2  137.39   10.40
   4   6   2  140.19    9.00
   6  -6   2  125.29    8.30
  -6  -6  -2  130.49   12.70
  -6   6  -2  124.99   10.50
   6   6   2  118.39    7.90
  -6   6  -2  123.49   10.50
   6   6   2  129.89    6.30
  -8  -6  -2   16.20    6.00
   8  -6   2   19.00    4.50
  -8   6  -2   13.80    5.10
   8   6   2   16.90    3.10
   8   6   2   14.00    2.90
  -8   6  -2   18.70    5.20
 -10  -6  -2  319.17   21.30
  10  -6   2  303.87   13.60
 -10   6  -2  297.57   17.50
 -10   6  -2  318.87   17.70
  10   6   2  304.57   11.60
  12  -6   2  388.46   16.40
 -12  -6  -2  390.96   25.40
 -12   6  -2  375.46   21.10
  12   6   2  388.76   14.40
 -12   6  -2  413.76   21.00
 -14  -6  -2  303.17   25.40
  14  -6   2  319.27   15.70
 -14   6  -2  271.47   20.50
  14   6   2  287.07   13.40
 -14   6  -2  325.17   20.10
 -16  -6  -2  130.59   19.30
  16  -6   2  139.89   12.90
 -16   6  -2  139.09   16.80
 -16   6  -2  147.89   15.70
  16   6   2  161.58   11.20
 -18  -6  -2    8.40   11.00
  18  -6   2   12.40    6.90
 -18   6  -2   -4.50    9.10
 -18   6  -2   11.40    7.10
  18   6   2   23.50    6.30
  20  -6   2    6.10    6.70
 -20  -6  -2    7.80   12.00
 -20   6  -2    5.10    6.60
  20   6   2    3.40    5.40
 -20   6  -2   16.90   11.10
 -22  -6  -2   -5.00   11.10
  22  -6   2   12.70    8.00
 -22   6  -2   13.20   11.30
  23  -7  -2   55.79   10.80
 -23  -7   2   40.10   15.20
 -23   7   2   51.89   11.90
  23   7  -2   60.99    9.40
 -23   7   2   68.19   15.40
 -21  -7   2   45.30   14.00
  21  -7  -2   46.10    9.10
 -21   7   2   47.70   11.20
  21   7  -2   56.09    8.90
 -21   7   2   39.10   12.20
  19  -7  -2   61.49    9.40
 -19  -7   2   59.09   13.90
 -19   7   2   52.79   10.70
 -19   7   2   67.09   12.70
  19   7  -2   54.09    8.50
  17  -7  -2    2.00    4.70
 -17  -7   2    2.20    8.40
 -17   7   2   -4.40    6.20
  17   7  -2    4.50    4.60
 -17   7   2    2.60    7.10
  15  -7  -2   63.69    7.60
 -15  -7   2   64.39   13.30
 -15   7   2   64.99   10.70
  15   7  -2   68.69    8.00
 -15   7   2   59.29   10.30
 -13  -7   2  724.33   34.80
  13  -7  -2  714.33   22.20
 -13   7   2  717.93   27.70
  13   7  -2  696.13   22.60
 -13   7   2  752.92   30.80
  11  -7  -2 1255.17   31.10
 -11  -7   2 1237.68   44.90
 -11   7   2 1239.58   36.90
 -11   7   2 1243.38   40.20
  11   7  -2 1195.48   31.90
   9  -7  -2 2113.19   46.40
  -9  -7   2 2145.39   61.39
  -9   7   2 2127.69   56.59
   9   7  -2 2106.79   48.10
  -9   7   2 2139.69   51.89
  -7  -7   2  933.41   35.30
   7  -7  -2  999.90   25.00
   7   7  -2  989.80   27.30
  -7   7   2  967.30   32.90
   7   7  -2  954.10   26.80
  -7   7   2  970.50   28.30
   5  -7  -2  669.63   18.90
   5  -7  -2  669.83   21.70
  -5  -7   2  663.33   27.20
   5   7  -2  671.23   21.70
   5   7  -2  656.43   21.30
  -5   7   2  665.93   21.30
  -5   7   2  689.73   26.10
  -3  -7   2    2.10    3.60
   3  -7  -2    5.20    3.00
  -3   7   2    0.40    3.30
   3   7  -2    2.80    3.00
  -3   7   2    5.20    2.80
   3   7  -2    3.90    2.90
   1  -7  -2  754.02   26.30
  -1  -7   2  788.52   27.00
  -1   7   2  747.93   21.10
   1   7  -2  746.13   23.60
   1   7  -2  751.72   24.80
  -1   7   2  736.53   26.40
   1  -7   2  916.41   28.30
  -1  -7  -2  925.51   31.50
  -1   7  -2  941.51   27.80
   1   7   2  895.21   29.30
  -1   7  -2  931.21   29.00
   1   7   2  902.31   23.60
  -3  -7  -2 1199.18   39.00
   3  -7   2 1231.68   31.80
  -3   7  -2 1189.18   34.00
   3   7   2 1198.28   33.90
  -3   7  -2 1200.58   35.20
   3   7   2 1186.98   28.10
  -5  -7  -2    8.10    5.30
   5  -7   2   12.30    3.90
   5   7   2   12.10    2.80
  -5   7  -2    6.80    4.20
   5   7   2    9.80    3.60
  -5   7  -2   10.60    4.20
   7  -7   2   20.70    4.90
  -7  -7  -2    9.30    6.00
  -7   7  -2   12.30    5.10
   7   7   2   19.20    4.00
  -7   7  -2   21.50    6.30
   7   7   2   16.70    3.20
  -9  -7  -2  383.96   23.90
   9  -7   2  379.46   16.10
  -9   7  -2  383.06   20.40
  -9   7  -2  368.46   19.60
   9   7   2  370.56   13.00
 -11  -7  -2  795.72   36.60
  11  -7   2  775.02   24.90
  11   7   2  734.43   21.60
 -11   7  -2  796.72   30.70
 -11   7  -2  790.22   30.80
 -13  -7  -2  636.54   35.20
  13  -7   2  643.34   23.00
 -13   7  -2  660.93   29.60
  13   7   2  633.94   20.30
 -13   7  -2  653.83   28.90
  15  -7   2  498.65   20.70
 -15  -7  -2  447.36   32.10
 -15   7  -2  476.75   26.70
 -15   7  -2  527.75   26.80
  15   7   2  463.65   18.00
 -17  -7  -2   69.89   16.20
  17  -7   2   88.49   10.90
 -17   7  -2   87.49   14.60
 -17   7  -2   54.79   10.30
 -19  -7  -2   11.30   11.60
  19  -7   2   14.90    7.30
 -19   7  -2    6.20    9.30
 -19   7  -2    9.10    6.60
  21  -7   2   48.10   10.10
 -21  -7  -2   15.30   13.80
 -21   7  -2   30.70   13.50
 -21   7  -2   34.80    9.70
 -22  -8   2   -3.50   11.60
  22  -8  -2   -4.80    6.20
  22   8  -2    0.90    5.50
 -22   8   2    4.20   10.00
 -22   8   2    1.70    7.80
  20  -8  -2   21.00    7.60
 -20  -8   2   15.10   11.40
  20   8  -2   22.90    6.60
 -20   8   2   26.90   11.70
 -20   8   2   26.90    9.50
  18  -8  -2    5.50    6.10
 -18  -8   2   12.60   10.20
 -18   8   2    8.30    9.00
 -18   8   2   17.40    8.70
  18   8  -2   18.00    5.90
 -16  -8   2   -3.00    8.10
  16  -8  -2   -0.10    4.70
  16   8  -2    0.20    4.20
 -16   8   2   -3.70    7.40
 -16   8   2   -8.90    5.60
  14  -8  -2  170.98   11.70
 -14  -8   2  136.99   18.10
  14   8  -2  156.08   11.70
 -14   8   2  154.78   18.40
 -14   8   2  174.98   16.20
  12  -8  -2  379.86   15.50
 -12  -8   2  385.96   26.40
  12   8  -2  345.77   16.00
 -12   8   2  366.06   19.80
 -12   8   2  367.06   23.00
  10  -8  -2  761.62   22.70
 -10  -8   2  755.22   35.00
 -10   8   2  781.42   27.40
 -10   8   2  787.62   31.50
  10   8  -2  749.03   24.00
   8  -8  -2  679.13   20.50
  -8  -8   2  671.83   31.20
  -8   8   2  671.73   24.10
  -8   8   2  679.43   28.50
   8   8  -2  690.03   23.10
   8   8  -2  664.23   22.30
   6  -8  -2  684.43   22.70
   6  -8  -2  686.73   20.50
  -6  -8   2  708.33   30.20
  -6   8   2  672.63   23.00
  -6   8   2  697.03   28.20
   6   8  -2  695.23   23.50
   6   8  -2  663.23   22.40
  -4  -8   2   53.89    8.90
   4  -8  -2   57.79    7.70
  -4   8   2   42.40    6.30
  -4   8   2   38.90    7.20
   4   8  -2   54.19    7.10
   4   8  -2   39.40    6.10
  -2  -8   2   46.00    7.80
   2  -8  -2   51.29    7.70
  -2   8   2   41.20    7.20
   2   8  -2   48.20    6.90
   2   8  -2   45.10    6.50
  -2   8   2   47.10    5.90
   0  -8   2   28.80    5.80
   0  -8  -2   29.30    6.50
   0   8  -2   25.00    5.30
   0   8   2   28.10    6.60
   0   8   2   28.20    4.40
   0   8  -2   26.80    5.60
  -2  -8  -2  214.48   15.90
   2  -8   2  201.38   12.50
  -2   8  -2  210.38   13.10
  -2   8  -2  209.68   14.10
   2   8   2  208.98   10.30
   2   8   2  238.68   15.20
   4  -8   2  207.18   11.70
  -4  -8  -2  192.88   16.30
   4   8   2  194.28    9.60
   4   8   2  197.78   13.30
  -4   8  -2  202.68   14.00
  -4   8  -2  194.98   14.30
   6  -8   2   37.80    6.30
  -6  -8  -2   28.50    9.10
  -6   8  -2   32.60    7.20
   6   8   2   30.20    4.40
  -6   8  -2   20.20    5.90
   6   8   2   31.70    6.00
   8  -8   2  206.98   13.20
  -8  -8  -2  220.08   20.50
  -8   8  -2  205.38   16.10
  -8   8  -2  201.78   16.00
   8   8   2  187.98    9.80
  10  -8   2  451.55   19.10
 -10  -8  -2  478.75   29.60
 -10   8  -2  454.75   23.60
 -10   8  -2  464.95   24.10
  10   8   2  433.76   15.60
  12  -8   2  443.06   19.50
 -12  -8  -2  418.36   30.10
 -12   8  -2  428.86   24.60
 -12   8  -2  434.76   24.20
 -14  -8  -2  261.57   26.40
  14  -8   2  254.27   15.70
 -14   8  -2  238.48   20.30
 -14   8  -2  262.47   20.60
  16  -8   2   22.60    7.00
 -16  -8  -2   16.90   11.20
 -16   8  -2   15.70    7.90
 -16   8  -2   32.90   10.50
 -18  -8  -2   19.00   12.20
  18  -8   2    9.90    7.00
 -18   8  -2   24.70    8.70
 -18   8  -2   23.00   10.80
 -20  -8  -2   -1.00   11.80
  20  -8   2    6.10    7.10
 -20   8  -2   13.20   10.90
 -20   8  -2   14.60    7.70
 -21  -9   2   24.80   14.20
  21  -9  -2   27.90    7.90
 -21   9   2   17.30    9.90
 -21   9   2   23.40   10.00
  21   9  -2   34.20    8.60
 -19  -9   2   77.89   16.70
  19  -9  -2   91.89   11.00
 -19   9   2   89.29   14.00
 -19   9   2   89.09   15.30
  19   9  -2   79.39   10.10
  17  -9  -2   49.60    8.40
  17   9  -2   58.89    8.40
 -17   9   2   53.29   12.10
 -17   9   2   61.39   11.60
 -15  -9   2   17.80   10.60
  15  -9  -2   22.70    6.30
  15   9  -2   13.80    5.50
 -15   9   2   28.80   10.30
 -15   9   2   21.60    8.50
  13  -9  -2    5.00    5.10
 -13  -9   2   11.50    9.50
 -13   9   2    1.10    6.50
  13   9  -2    3.10    4.40
 -13   9   2   -2.60    7.30
 -11  -9   2   -6.20    6.50
  11  -9  -2    9.70    4.70
 -11   9   2   -3.10    6.40
 -11   9   2   12.20    6.00
  11   9  -2   16.10    5.10
   9  -9  -2  195.48   11.40
  -9  -9   2  199.38   19.70
  -9   9   2  181.58   17.20
  -9   9   2  198.98   14.40
   9   9  -2  216.58   13.20
   7  -9  -2   46.10    6.10
  -7  -9   2   39.90    9.30
  -7   9   2   55.19    7.70
   7   9  -2   40.90    7.20
   7   9  -2   50.59    7.60
  -7   9   2   38.70    7.80
   5  -9  -2  524.35   22.10
  -5  -9   2  524.55   26.60
   5   9  -2  527.85   21.70
   5   9  -2  489.45   20.30
  -5   9   2  504.25   19.80
  -5   9   2  518.65   25.10
   3  -9  -2   32.40    6.60
  -3  -9   2   35.30    8.00
   3   9  -2   38.50    6.80
  -3   9   2   40.60    7.80
   3   9  -2   38.40    6.90
  -3   9   2   39.50    6.00
   1  -9  -2  559.84   24.80
  -1  -9   2  523.45   24.10
   1   9  -2  580.04   23.60
  -1   9   2  515.75   18.70
  -1   9   2  522.05   24.40
   1   9  -2  526.35   21.10
   1  -9   2  397.26   19.60
  -1  -9  -2  397.46   22.00
   1   9   2  385.76   20.70
   1   9   2  380.16   15.20
  -1   9  -2  393.06   19.80
  -1   9  -2  406.96   18.70
   3  -9   2  304.17   16.20
  -3  -9  -2  306.77   20.60
   3   9   2  311.17   18.10
  -3   9  -2  324.87   17.20
   3   9   2  288.77   13.10
  -3   9  -2  312.47   18.50
  -5  -9  -2  209.28   18.70
  -5   9  -2  201.08   16.00
  -5   9  -2  178.48   15.00
   5   9   2  188.78   14.40
   5   9   2  189.78   11.40
  -7  -9  -2  167.18   19.40
  -7   9  -2  176.28   16.00
  -7   9  -2  208.48   16.90
  -9  -9  -2  224.88   23.20
   9  -9   2  248.18   15.40
  -9   9  -2  233.48   18.50
  -9   9  -2  238.38   18.50
  11  -9   2  136.79   12.70
 -11  -9  -2  100.49   17.20
 -11   9  -2  143.29   16.50
 -11   9  -2  146.79   16.20
  13  -9   2   10.50    5.60
 -13  -9  -2   -1.50    8.70
 -13   9  -2   15.70    8.00
 -13   9  -2    6.00    5.90
  15  -9   2   21.60    7.40
 -15  -9  -2   27.70   12.10
 -15   9  -2   23.90    8.10
 -15   9  -2   36.40   10.20
 -17  -9  -2    1.40   11.40
  17  -9   2   13.50    7.40
 -17   9  -2   20.30   10.20
 -17   9  -2    9.20    8.00
 -19  -9  -2   26.70   13.70
  19  -9   2   22.20    9.00
 -19   9  -2   24.60   12.10
 -19   9  -2   18.50    9.30
  20 -10  -2  207.68   16.50
 -20 -10   2  153.78   23.60
 -20  10   2  226.98   24.30
 -20  10   2  231.78   23.00
 -18 -10   2  257.57   29.50
  18 -10  -2  274.77   17.10
 -18  10   2  298.27   25.70
 -18  10   2  302.17   23.40
  16 -10  -2   98.49   11.20
 -16 -10   2   87.89   16.70
 -16  10   2   99.59   14.20
 -16  10   2   99.09   14.40
  16  10  -2   85.19   10.30
  14 -10  -2   -4.60    4.50
 -14 -10   2   -2.40    8.30
 -14  10   2    2.20    7.40
  14  10  -2   -6.80    3.70
 -14  10   2    7.10    7.30
 -12 -10   2   73.99   13.90
  12 -10  -2   78.59    9.30
 -12  10   2   86.79   13.60
 -12  10   2   93.49   12.50
  12  10  -2   79.39    9.40
  10 -10  -2  190.08   12.90
 -10 -10   2  202.78   21.00
 -10  10   2  212.58   16.40
 -10  10   2  175.88   19.60
  10  10  -2  183.18   13.10
  -8 -10   2   42.20   10.00
  -8  10   2   36.90    7.70
  -8  10   2   22.30    9.20
   8  10  -2   36.40    7.30
  -6 -10   2  108.29   14.30
  -6  10   2  126.79   16.20
  -6  10   2  133.19   11.60
   6  10  -2  131.29   13.00
   6  10  -2  104.29   11.30
  -4 -10   2  342.47   23.00
  -4  10   2  376.36   16.80
  -4  10   2  373.66   22.80
   4  10  -2  377.96   18.40
   4  10  -2  376.76   19.80
   2 -10  -2  476.45   23.90
  -2 -10   2  495.05   25.70
   2  10  -2  503.75   23.50
  -2  10   2  516.65   25.90
   2  10  -2  481.25   21.10
  -2  10   2  489.65   18.80
   0 -10  -2 1158.68   41.00
   0 -10   2 1198.28   39.80
   0  10  -2 1220.88   39.50
   0  10   2 1169.98   36.60
   0  10  -2 1208.18   36.20
   0  10   2 1232.18   41.30
  -2 -10  -2 1245.18   44.10
   2 -10   2 1208.98   38.80
  -2  10  -2 1225.08   40.40
   2  10   2 1229.68   40.80
  -2  10  -2 1199.88   36.90
  -4 -10  -2  531.45   29.10
  -4  10  -2  518.15   25.30
  -4  10  -2  464.95   22.10
   4  10   2  507.55   24.10
  -6 -10  -2  352.56   25.30
  -6  10  -2  328.87   20.90
   6  10   2  369.46   25.10
  -6  10  -2  313.07   19.50
  -8 -10  -2   35.40   11.20
  -8  10  -2   48.30    9.50
  -8  10  -2   34.30    9.10
  10 -10   2    8.20    6.00
 -10 -10  -2    6.90    9.60
 -10  10  -2   15.10    7.90
 -10  10  -2    6.00    5.40
  12 -10   2  192.58   15.80
 -12 -10  -2  217.68   25.00
 -12  10  -2  195.88   19.50
 -12  10  -2  221.48   19.80
 -14 -10  -2    8.20   11.10
  14 -10   2   27.00    8.00
 -14  10  -2   19.50   10.20
 -14  10  -2   15.50    8.00
 -16 -10  -2   16.50   13.60
  16 -10   2   41.90    9.50
 -16  10  -2   43.50   12.70
 -16  10  -2   31.70   11.00
 -18 -10  -2    2.40   12.40
  18 -10   2   18.20    8.80
 -18  10  -2   -3.20    7.90
 -18  10  -2    9.20   10.90
  19 -11  -2  318.67   20.20
 -19 -11   2  300.17   33.70
 -19  11   2  332.37   28.80
 -19  11   2  295.67   25.60
  17 -11  -2  194.38   15.70
 -17 -11   2  245.08   29.90
 -17  11   2  228.58   21.10
 -17  11   2  242.58   24.90
  15 -11  -2    8.70    5.80
 -15 -11   2    2.10   10.10
 -15  11   2    2.30    8.00
 -15  11   2    5.40    8.20
  13 -11  -2    0.50    5.20
 -13 -11   2   -0.70    9.20
 -13  11   2    2.10    6.50
 -13  11   2   -3.50    6.60
  13  11  -2    3.90    7.20
  11 -11  -2   85.99   10.20
 -11 -11   2   84.89   15.60
 -11  11   2   95.09   13.90
 -11  11   2   99.39   12.60
  11  11  -2   71.09    9.60
  -9 -11   2  123.39   17.30
   9  11  -2  130.19   12.60
  -9  11   2  141.69   13.80
  -9  11   2  123.39   16.60
  -7 -11   2   24.70    9.30
   7  11  -2   36.20    8.00
  -7  11   2   26.60    9.70
  -7  11   2   33.70    7.50
  -5 -11   2    3.30    7.30
   5  11  -2    9.10    5.80
  -5  11   2    5.10    6.20
   5  11  -2   14.80    5.80
  -5  11   2   -3.10    6.80
  -3 -11   2  185.58   18.70
  -3  11   2  187.78   18.90
   3  11  -2  206.58   16.80
   3  11  -2  164.28   14.00
  -1 -11   2  624.54   29.80
   1 -11  -2  659.53   30.40
   1  11  -2  634.34   28.50
   1  11  -2  593.64   24.70
  -1  11   2  676.93   31.00
  -1 -11  -2  955.10   38.80
  -1  11  -2  859.31   31.00
  -1  11  -2  938.21   35.80
   1  11   2  978.40   37.40
  -3 -11  -2  634.14   32.60
   3  11   2  607.54   28.40
  -3  11  -2  624.34   25.90
  -3  11  -2  597.14   28.70
  -5 -11  -2  306.77   25.00
  -5  11  -2  306.27   19.20
   5  11   2  320.77   26.90
  -5  11  -2  326.67   22.20
  -7 -11  -2   50.99   13.10
  -7  11  -2   64.69   10.60
  -7  11  -2   47.90    9.80
  -9 -11  -2   16.90   10.50
  -9  11  -2    6.70    6.70
  -9  11  -2    7.50    7.60
 -11 -11  -2   61.89   15.10
  11 -11   2   67.99   10.90
 -11  11  -2   49.80   12.20
 -11  11  -2   75.29   12.30
 -13 -11  -2   58.49   16.60
  13 -11   2   44.10    9.50
 -13  11  -2   50.79   12.50
 -13  11  -2   41.70   10.60
 -15 -11  -2   10.20   13.00
  15 -11   2    6.00    7.70
 -15  11  -2   19.80   11.20
 -15  11  -2    5.60    9.20
  17 -11   2   -3.30    7.30
 -17 -11  -2   -8.40   11.70
 -17  11  -2   -6.20    7.70
 -17  11  -2    0.90    9.70
  16 -12  -2   39.80    8.90
 -16 -12   2   48.80   17.00
 -16  12   2   48.40   12.70
 -16  12   2   55.29   12.10
 -14 -12   2   39.70   14.70
  14 -12  -2   26.50    7.90
 -14  12   2   42.70   11.20
 -14  12   2   23.40   11.60
 -12 -12   2   27.20   12.60
 -12  12   2   33.60   10.80
 -12  12   2   18.10   10.40
 -10 -12   2  -10.20    8.20
 -10  12   2   -4.90    7.30
  -8 -12   2    1.80    8.50
  -8  12   2    4.60    7.90
  -6 -12   2   23.80   10.10
   6  12  -2   30.60    7.70
  -6  12   2   34.20   10.70
  -4 -12   2  137.09   17.40
   4  12  -2  153.68   16.00
  -4  12   2  134.29   16.60
   4  12  -2  100.59   11.80
  -2 -12   2   17.50    8.10
   2  12  -2   25.30    7.80
   2  12  -2   20.00    7.40
  -2  12   2   18.60    8.60
   0 -12  -2  240.78   20.60
   0  12  -2  191.88   15.60
   0  12   2  256.97   21.30
   0  12  -2  244.08   19.30
  -2 -12  -2  118.79   16.00
  -2  12  -2   89.19   12.40
  -2  12  -2  117.99   13.30
   2  12   2  138.29   17.30
  -4 -12  -2   97.99   15.90
  -4  12  -2   96.49   13.60
  -4  12  -2  116.89   13.50
  -6 -12  -2   37.60   12.40
  -6  12  -2   37.30    9.70
  -6  12  -2   32.70    8.90
  -8 -12  -2   -0.30   10.50
  -8  12  -2   13.30    7.90
  -8  12  -2   18.40    7.70
 -10 -12  -2    8.70   11.30
 -10  12  -2   10.30    8.40
 -10  12  -2   17.00    8.80
 -12 -12  -2    0.90   11.20
 -12  12  -2    4.30    8.10
 -12  12  -2    7.40    8.90
  14 -12   2    9.20    8.10
 -14 -12  -2    4.80   12.30
 -14  12  -2   -6.50    8.10
 -14  12  -2    1.70   10.10
 -15 -13   2   42.10   15.90
 -15  13   2   31.80   12.40
 -13 -13   2   43.40   15.70
 -13  13   2   46.10   13.10
 -11 -13   2  127.89   20.30
 -11  13   2  160.98   21.10
  -9 -13   2  138.49   20.20
  -9  13   2  187.48   23.30
  -7 -13   2   56.09   13.50
  -7  13   2   66.99   13.30
  -5 -13   2   33.20   11.00
  -5  13   2   52.89   12.50
  -3 -13   2   68.69   12.80
   3  13  -2   66.09   11.10
  -3  13   2   64.79   12.90
   1  13  -2  145.59   15.00
   1  13  -2  149.99   17.40
  -1  13   2  166.78   20.50
  -1 -13  -2   90.59   16.10
  -1  13  -2   98.59   12.40
  -1  13  -2   87.59   12.70
   1  13   2  105.59   15.20
  -3 -13  -2    6.50    8.20
  -3  13  -2    4.80    5.90
  -3  13  -2   -0.40    6.40
  -5 -13  -2   57.69   13.80
  -5  13  -2   51.99   11.80
  -5  13  -2   38.50   10.10
  -7 -13  -2   -5.10    9.30
  -7  13  -2    4.90    7.10
  -7  13  -2   -1.20    7.30
  -9 -13  -2   50.89   15.80
  -9  13  -2   50.89   12.40
  -9  13  -2   55.29   12.00
 -11 -13  -2   27.40   13.80
 -11  13  -2   42.20   12.40
 -11  13  -2   32.40   11.50
 -13 -13  -2   96.49   20.60
 -13  13  -2  102.59   17.10
 -10 -14   2  335.97   31.80
 -10  14   2  346.07   30.00
  -8 -14   2  201.58   25.10
  -8  14   2  128.09   18.40
  -6 -14   2   46.50   13.20
  -6  14   2   45.00   12.00
  -4  14   2  182.88   22.70
   2  14  -2   71.59   13.30
  -2  14   2   87.79   15.10
   0  14   2  204.58   23.10
   0  14  -2  173.58   19.80
  -2  14  -2  318.77   24.30
  -4 -14  -2   76.09   15.70
  -4  14  -2   76.89   13.40
  -6 -14  -2   12.90   10.80
  -6  14  -2    7.20    9.20
  -6  14  -2   12.10    8.30
  -8 -14  -2   23.70   13.60
  -8  14  -2   25.90   10.60
  -8  14  -2   14.20   10.50
  -5  15   2   -0.40   10.00
  -3  15   2    8.80   10.50
   1  15  -2   68.49   19.70
  -1  15   2   66.09   14.10
  -1  15  -2   20.00    9.20
  -3  15  -2   72.99   13.90
  28   0  -3   13.30    7.50
  26   0  -3    0.50    6.00
  24   0  -3   49.90    8.70
  22   0  -3    0.40    5.00
  20   0  -3   -7.40    4.10
 -18   0   3   10.10    5.00
  18   0  -3    9.00    4.00
 -16   0   3   31.10    5.50
  16   0  -3   27.50    4.60
 -14   0   3   14.00    3.90
  14   0  -3   13.80    3.50
 -12   0   3    2.30    2.50
 -12   0   3    3.50    2.30
  12   0  -3    0.80    2.00
 -10   0   3    2.70    2.00
 -10   0   3   -0.70    1.80
  10   0  -3   -0.30    1.60
   8   0  -3    6.20    1.70
  -8   0   3    5.10    1.60
  -8   0   3    3.70    1.90
  -6   0   3    1.90    1.30
  -6   0   3    3.60    1.50
   6   0  -3    5.00    1.60
  -4   0   3    1.20    1.50
   4   0  -3    1.70    1.30
  -4   0   3   -1.40    1.30
  -2   0   3   -1.60    1.10
   0   0   3    0.20    0.90
   0   0   3    0.60    1.20
   2   0   3    6.40    2.00
  -4   0  -3    7.90    2.40
   4   0   3    7.30    2.20
  -4   0  -3    5.40    1.60
  -4   0  -3    8.30    2.40
  -6   0  -3    5.60    1.90
   6   0   3    4.90    1.90
   6   0   3    3.90    2.30
  -6   0  -3    8.00    2.70
   8   0   3   13.00    3.30
   8   0   3   17.60    3.00
  -8   0  -3   13.80    3.80
  -8   0  -3   11.50    2.50
   8   0   3   19.70    3.40
  10   0   3    5.00    2.90
 -10   0  -3    5.70    2.50
 -10   0  -3    9.00    3.90
  10   0   3    9.70    3.00
  10   0   3    6.20    2.50
  12   0   3    5.90    3.10
 -12   0  -3    3.50    2.80
  12   0   3   -1.80    2.80
  12   0   3   -1.10    2.60
 -12   0  -3   -5.40    3.70
 -14   0  -3   -4.60    4.70
  14   0   3   -3.50    3.60
 -14   0  -3   -0.30    2.80
  14   0   3    2.20    3.30
  16   0   3    9.00    4.80
 -16   0  -3    6.60    6.30
  18   0   3   18.60    5.90
  20   0   3    8.60    6.30
  22   0   3   -4.50    5.90
  24   0   3   -2.20    7.40
  27  -1  -3   20.50    8.20
  27   1  -3   15.50    7.90
  27   1  -3   23.80   15.60
  25  -1  -3  162.78   15.00
  25   1  -3  156.68   21.80
  25   1  -3  158.38   15.00
  23  -1  -3   90.69   10.60
  23   1  -3   96.29   11.00
  21  -1  -3    1.30    4.70
 -21  -1   3    0.10    5.90
  21   1  -3    2.50    4.70
 -19  -1   3  357.46   20.40
  19  -1  -3  389.26   16.60
  19   1  -3  366.96   16.40
  17  -1  -3  403.26   16.00
 -17  -1   3  422.56   20.40
 -17   1   3  413.76   16.80
 -17   1   3  431.56   17.30
  17   1  -3  414.16   16.10
 -15  -1   3 1702.33   45.80
  15  -1  -3 1725.03   39.70
 -15   1   3 1769.92   40.90
  15   1  -3 1705.53   39.70
 -15   1   3 1665.33   40.70
  13  -1  -3 1365.16   32.10
 -13  -1   3 1398.36   38.10
 -13   1   3 1418.66   33.30
  13   1  -3 1357.76   32.30
 -13   1   3 1378.36   33.70
 -11  -1   3  505.05   18.60
  11  -1  -3  475.55   14.20
 -11   1   3  496.55   14.80
  11   1  -3  492.75   14.50
 -11   1   3  464.25   15.60
   9  -1  -3  163.78    6.80
  -9  -1   3  181.08    9.80
  -9   1   3  157.68    8.10
  -9   1   3  175.48    7.00
   9   1  -3  168.78    7.10
  -7  -1   3  834.22   22.60
   7  -1  -3  821.42   18.60
  -7   1   3  898.71   19.00
  -7   1   3  810.92   20.80
   7   1  -3  825.22   22.00
   7   1  -3  844.22   19.30
  -5  -1   3 1092.29   23.00
  -5  -1   3 1117.19   26.20
   5  -1  -3 1103.29   22.70
   5   1  -3 1161.68   23.70
  -5   1   3 1096.99   25.10
  -5   1   3 1153.78   23.20
   5   1  -3 1141.49   25.70
  -3  -1   3 1945.91   39.60
   3  -1  -3 1971.60   36.70
  -3  -1   3 1966.10   38.90
  -3   1   3 1947.31   39.80
  -3   1   3 1976.60   38.20
   3   1  -3 1996.00   38.70
  -1  -1   3  502.75   13.30
  -1  -1   3  524.45   12.30
   1   1  -3  500.45   12.70
  -1   1   3  491.05   12.80
  -1   1   3  474.75   12.00
   1  -1   3  636.84   14.50
   1  -1   3  598.84   14.30
   1  -1   3  627.84   16.50
  -1   1  -3  628.04   15.10
   1   1   3  586.64   14.30
   1   1   3  617.54   15.50
   1   1   3  644.24   15.10
  -1   1  -3  614.84   15.90
   1   1   3  605.44   12.50
   3  -1   3  142.39    7.60
   3  -1   3  148.59    5.70
   3  -1   3  134.59    5.50
  -3  -1  -3  131.69    7.60
  -3   1  -3  120.89    6.00
   3   1   3  137.19    6.10
  -3   1  -3  144.39    7.20
   3   1   3  133.09    4.60
   3   1   3  134.09    6.60
  -5  -1  -3 2229.18   50.09
   5  -1   3 2279.07   49.00
   5  -1   3 2245.38   44.90
   5  -1   3 2304.47   44.90
   5   1   3 2188.88   43.60
  -5   1  -3 2162.68   46.10
   5   1   3 2305.47   46.90
  -5   1  -3 2243.68   48.50
   5   1   3 2228.78   46.40
  -7  -1  -3  915.91   27.30
   7  -1   3  938.31   25.90
   7  -1   3  955.80   22.30
  -7  -1  -3  904.91   21.90
   7  -1   3  905.11   21.80
  -7   1  -3  966.40   25.10
   7   1   3  901.81   21.20
   7   1   3  910.81   23.60
  -7   1  -3  932.01   26.00
   7   1   3  927.31   23.70
  -7   1  -3  921.31   23.40
   9  -1   3 1557.44   34.40
  -9  -1  -3 1549.24   41.40
   9  -1   3 1519.15   38.60
   9  -1   3 1505.65   34.10
  -9  -1  -3 1529.45   34.00
   9   1   3 1541.25   33.70
  -9   1  -3 1538.05   35.90
   9   1   3 1578.44   36.70
  -9   1  -3 1550.44   38.00
   9   1   3 1552.74   36.20
  11  -1   3  884.71   23.60
  11  -1   3  919.71   23.80
  11  -1   3  877.71   27.60
 -11  -1  -3  896.71   30.40
 -11  -1  -3  881.71   23.00
  11   1   3  887.71   25.40
 -11   1  -3  857.91   24.70
  11   1   3  897.81   23.10
  11   1   3  916.51   26.00
 -11   1  -3  940.31   28.00
 -13  -1  -3  141.99   13.50
  13  -1   3  151.58    9.40
  13  -1   3  128.69   11.70
  13  -1   3  157.98    9.70
 -13  -1  -3  148.19    9.00
  13   1   3  154.38   10.30
 -13   1  -3  164.68   10.60
  13   1   3  152.88    9.20
 -13   1  -3  162.98   12.60
  13   1   3  144.79   10.50
 -15  -1  -3   18.40    7.20
  15  -1   3   15.50    4.80
 -15   1  -3    8.70    4.20
 -15   1  -3    9.80    5.00
  15   1   3   14.00    4.60
 -17  -1  -3   21.60    8.20
  17  -1   3   23.70    6.10
  17   1   3   26.00    6.20
 -17   1  -3   16.30    8.50
  19  -1   3  142.89   12.90
  19   1   3  138.69   12.40
  21  -1   3   78.99   10.50
  21   1   3   88.19   10.60
  23  -1   3   -8.30    6.70
 -23   1  -3    0.10   10.80
  23   1   3   11.10   12.40
  23   1   3    3.10    6.50
  26  -2  -3  159.18   15.70
  26   2  -3  150.98   22.70
  26   2  -3  142.29   15.20
  24  -2  -3  140.89   13.60
  24   2  -3  135.99   19.60
  24   2  -3  125.99   13.50
 -22  -2   3   11.30    7.50
  22  -2  -3    8.00    5.30
  22   2  -3   16.40    9.90
  22   2  -3    2.50    5.00
  20  -2  -3   51.29    7.60
 -20  -2   3   43.00    9.30
  20   2  -3   56.69   12.00
  20   2  -3   49.30    7.50
 -18  -2   3  693.93   29.50
  18  -2  -3  687.63   22.10
  18   2  -3  681.63   22.30
  18   2  -3  678.13   30.10
 -18   2   3  704.23   25.00
 -16  -2   3 1442.06   43.70
  16  -2  -3 1455.55   35.20
  16   2  -3 1433.66   35.40
  16   2  -3 1426.86   43.60
 -16   2   3 1418.56   38.20
 -14  -2   3 2476.95   61.39
  14  -2  -3 2398.36   51.89
  14   2  -3 2497.95   60.59
 -14   2   3 2393.86   55.39
  14   2  -3 2402.96   52.09
  12  -2  -3 2470.05   50.99
 -12  -2   3 2502.55   59.79
 -12   2   3 2381.86   54.49
  12   2  -3 2448.06   58.19
  12   2  -3 2451.15   51.29
  10  -2  -3  922.01   22.20
 -10  -2   3  960.80   29.10
  10   2  -3  950.40   22.80
  10   2  -3  938.21   27.40
 -10   2   3  894.61   25.40
   8  -2  -3  101.79    5.10
  -8  -2   3   98.99    8.10
  -8   2   3   89.89    7.00
   8   2  -3  101.89    5.50
   8   2  -3  109.39    7.70
   6  -2  -3 7482.65  137.79
  -6  -2   3 7482.95  144.89
  -6   2   3 7907.61  137.29
  -6   2   3 7183.98  142.39
   6   2  -3 7684.83  139.39
   4  -2  -3  654.43   13.80
  -4  -2   3  647.74   15.60
  -4  -2   3  657.93   18.60
   4   2  -3  623.14   14.40
   4   2  -3  669.53   16.20
  -4   2   3  657.53   14.60
  -2  -2   3 3921.61   72.89
  -2  -2   3 3816.42   72.49
  -2   2   3 3802.22   70.59
  -2   2   3 3614.74   72.69
   2   2  -3 3653.13   70.59
   2   2  -3 3690.13   72.19
   0  -2   3  118.29    5.10
   0  -2   3  121.19    6.60
   0  -2  -3  117.69    6.60
   0   2  -3  119.19    6.30
   0   2   3  123.19    5.40
   0   2  -3  116.99    5.40
   0   2   3  115.69    6.00
   2  -2   3   24.90    2.60
   2  -2   3   23.80    2.90
   2   2   3   24.20    3.40
  -2   2  -3   17.00    3.10
   2   2   3   22.80    3.10
   4  -2   3 1652.73   35.20
   4  -2   3 1724.03   39.70
   4  -2   3 1770.62   34.30
  -4  -2  -3 1709.63   40.60
  -4   2  -3 1625.64   36.60
   4   2   3 1685.53   36.80
   4   2   3 1680.33   32.90
   4   2   3 1685.43   37.90
   4   2   3 1673.43   36.00
  -4   2  -3 1686.93   38.80
  -6  -2  -3 2016.20   48.10
   6  -2   3 2016.90   40.00
   6  -2   3 1984.60   41.40
   6  -2   3 1993.20   46.40
   6   2   3 1974.50   45.50
   6   2   3 1963.00   43.50
  -6   2  -3 1932.91   43.20
   6   2   3 1994.00   42.20
  -6   2  -3 2020.50   45.90
   6   2   3 1942.51   39.40
  -8  -2  -3 3461.25   76.09
   8  -2   3 3339.57   67.09
   8  -2   3 3295.47   65.09
   8  -2   3 3370.56   72.99
  -8   2  -3 3338.37   68.49
   8   2   3 3376.56   67.89
   8   2   3 3408.16   69.99
  -8   2  -3 3379.56   72.69
   8   2   3 3341.17   65.29
  -8   2  -3 3269.57   69.09
   8   2   3 3367.46   73.09
 -10  -2  -3  786.82   20.20
  10  -2   3  786.72   26.20
 -10  -2  -3  801.42   28.90
  10  -2   3  762.72   19.80
  10  -2   3  768.62   21.30
 -10   2  -3  783.12   23.00
  10   2   3  763.52   21.70
 -10   2  -3  797.02   23.60
 -10   2  -3  778.62   26.30
  10   2   3  800.02   20.40
  10   2   3  766.62   27.20
  10   2   3  806.12   24.30
 -12  -2  -3  537.25   25.00
 -12  -2  -3  548.15   16.40
  12  -2   3  550.24   17.90
  12  -2   3  549.35   16.80
  12   2   3  555.54   20.70
  12   2   3  532.65   18.10
 -12   2  -3  572.24   20.20
 -12   2  -3  529.15   19.70
 -12   2  -3  557.34   23.10
  12   2   3  549.95   17.00
 -14  -2  -3  194.68   17.10
  14  -2   3  208.38   11.60
 -14   2  -3  195.88   15.40
 -14   2  -3  203.08   13.80
  14   2   3  217.48   11.20
 -14   2  -3  199.28   13.00
  16  -2   3   -5.20    3.60
 -16  -2  -3   13.80    7.50
  16   2   3   -2.20    3.80
 -16   2  -3   -2.40    4.00
 -16   2  -3   -0.90    5.90
  16   2   3   -1.30    7.70
 -18  -2  -3  275.47   22.60
  18  -2   3  265.37   15.40
 -18   2  -3  262.97   20.80
  18   2   3  270.77   14.60
  18   2   3  290.47   24.20
  20  -2   3   76.89   10.00
 -20  -2  -3   63.89   15.30
  20   2   3   89.09   17.30
  20   2   3   61.29    8.90
 -20   2  -3   63.19   13.20
  22  -2   3   14.40    7.70
 -22   2  -3    2.90    9.80
  22   2   3    2.30    6.10
  22   2   3    8.90   11.80
  24  -2   3    1.30    7.60
  24   2   3    5.70    7.20
  24   2   3    2.20   15.00
 -24   2  -3    4.20   10.80
  27  -3  -3   -1.60    7.40
  27   3  -3    8.80   14.20
  27   3  -3    4.30    7.70
  25  -3  -3    4.40    6.90
  25   3  -3    8.60   12.70
  25   3  -3   -2.70    6.00
 -23  -3   3    0.50    7.30
  23  -3  -3    5.70    6.20
  23   3  -3    1.40    6.00
  23   3  -3   -8.30   11.10
 -21  -3   3   80.39   13.10
  21  -3  -3  105.69   11.30
  21   3  -3   87.99    9.90
  21   3  -3  115.69   16.80
  19  -3  -3  206.58   12.60
 -19  -3   3  197.68   18.80
  19   3  -3  227.48   13.40
  19   3  -3  218.28   19.30
 -19   3   3  191.88   16.10
  17  -3  -3  694.43   22.00
 -17  -3   3  695.53   30.60
  17   3  -3  737.23   30.30
 -17   3   3  689.53   26.30
  17   3  -3  711.83   22.50
 -15  -3   3  862.31   32.90
  15  -3  -3  858.11   24.00
  15   3  -3  851.71   24.20
  15   3  -3  906.71   31.90
 -15   3   3  836.42   28.40
  13  -3  -3  250.47   10.90
 -13  -3   3  251.07   16.40
 -13   3   3  271.67   14.80
  13   3  -3  265.47   11.20
  13   3  -3  253.47   15.80
 -11  -3   3 2060.69   53.59
  11  -3  -3 2060.69   43.50
  11   3  -3 2099.79   44.30
 -11   3   3 2017.80   48.90
  -9  -3   3   16.00    4.70
   9  -3  -3   25.90    3.20
  -9   3   3   20.80    4.50
   9   3  -3   16.20    3.10
  -7  -3   3   16.50    3.90
   7  -3  -3   13.60    2.20
  -7   3   3   15.00    3.50
   7   3  -3   13.50    2.60
  -5  -3   3  137.19    8.90
   5  -3  -3  137.89    5.00
  -5  -3   3  132.69    6.10
   5   3  -3  135.69    6.60
   5   3  -3  128.79    5.10
  -5   3   3  134.99    5.00
  -5   3   3  137.09    8.50
   3  -3  -3 1214.88   23.30
  -3  -3   3 1173.28   27.40
  -3  -3   3 1221.08   29.80
   3  -3  -3 1184.98   27.00
  -3   3   3 1207.48   24.70
  -3   3   3 1146.89   29.00
  -3   3   3 1203.78   25.10
   3   3  -3 1213.78   27.60
   3   3  -3 1146.59   25.40
  -1  -3   3  659.73   17.60
   1  -3  -3  644.34   18.30
  -1  -3   3  644.44   18.50
   1   3  -3  646.74   18.00
  -1   3   3  658.53   18.20
  -1   3   3  645.44   16.10
   1   3  -3  640.94   16.50
  -1  -3  -3  252.37   11.20
   1  -3   3  258.87   11.10
   1  -3   3  258.67    8.50
   1   3   3  236.28    9.30
  -1   3  -3  257.57   10.50
   1   3   3  252.17    9.20
  -1   3  -3  233.38    9.20
  -3  -3  -3  188.68   10.50
   3  -3   3  183.48   10.10
   3  -3   3  175.08    7.50
   3  -3   3  199.98    6.70
   3   3   3  177.08    8.30
  -3   3  -3  180.98    9.30
   3   3   3  168.98    7.60
  -3   3  -3  175.88    8.30
   5  -3   3  936.31   27.70
   5  -3   3  988.30   20.90
   5  -3   3  937.41   22.90
  -5  -3  -3  979.40   29.20
  -5   3  -3  922.01   26.40
   5   3   3  915.51   24.60
   5   3   3  931.81   23.00
  -5   3  -3  937.81   24.90
   5   3   3  935.11   20.00
  -7  -3  -3 1939.31   49.90
   7  -3   3 1905.51   41.60
   7  -3   3 1956.70   48.00
  -7   3  -3 1886.61   44.10
  -7   3  -3 1982.50   47.00
   7   3   3 1934.91   38.90
   7   3   3 1901.41   41.50
   7   3   3 1928.31   44.40
   7   3   3 1857.61   45.90
   9  -3   3 1104.29   27.60
  -9  -3  -3 1115.19   36.10
   9   3   3 1097.79   30.60
   9   3   3 1096.89   25.50
  -9   3  -3 1065.79   30.10
   9   3   3 1119.59   33.20
   9   3   3 1090.89   27.50
  -9   3  -3 1158.48   33.40
 -11  -3  -3  505.85   24.30
 -11  -3  -3  424.46   13.90
  11  -3   3  441.26   16.00
  11   3   3  470.35   14.70
  11   3   3  401.96   15.00
 -11   3  -3  446.46   20.60
  11   3   3  444.66   21.30
  11   3   3  467.95   19.10
 -11   3  -3  461.35   18.60
  13  -3   3  177.18   10.90
 -13  -3  -3  176.68   17.20
  13   3   3  176.48    9.80
  13   3   3  171.48   15.20
 -13   3  -3  168.48   14.60
 -13   3  -3  183.98   13.10
  15  -3   3  366.76   16.70
 -15  -3  -3  374.76   24.90
 -15   3  -3  370.86   22.20
  15   3   3  423.46   23.80
 -15   3  -3  408.26   19.70
  15   3   3  401.86   15.90
 -17  -3  -3   95.49   14.00
  17  -3   3  117.79   11.30
 -17   3  -3  124.29   13.30
  17   3   3  104.49   10.40
  17   3   3  100.29   16.40
 -17   3  -3   87.49   13.70
  19  -3   3    9.10    6.40
 -19  -3  -3   19.50    9.80
 -19   3  -3    6.40    8.70
  19   3   3   14.00    5.70
  19   3   3   14.50   11.60
  21  -3   3    9.70    6.70
 -21  -3  -3   27.90   11.20
  21   3   3   18.50   14.30
 -21   3  -3    1.40    9.40
  21   3   3    8.20    6.10
  23  -3   3   40.60    9.70
  23   3   3   34.10    8.70
  23   3   3   55.19   17.40
  26  -4  -3   99.69   12.60
  26   4  -3  137.69   15.20
 -24  -4   3  166.98   21.40
  24  -4  -3  146.99   14.90
  24   4  -3  149.09   14.70
  22  -4  -3   91.29   10.70
 -22  -4   3   87.49   14.80
  22   4  -3   92.69   10.70
 -20  -4   3   54.39   11.70
  20  -4  -3   55.39    8.50
 -20   4   3   43.00    9.10
  20   4  -3   61.79    8.70
  18  -4  -3   98.59    9.60
 -18  -4   3   69.59   12.50
 -18   4   3   56.39    9.50
  18   4  -3   72.09    8.00
 -16  -4   3   23.20    7.80
  16  -4  -3   16.90    4.40
  16   4  -3   30.60    5.00
 -16   4   3   15.90    6.10
  14  -4  -3   11.60    4.00
 -14  -4   3    9.10    5.70
 -14   4   3   13.30    5.10
  14   4  -3   18.70    3.80
  12  -4  -3  151.68    8.30
 -12  -4   3  145.49   13.30
  12   4  -3  150.48    8.50
 -12   4   3  151.98   12.10
  10  -4  -3   54.59    5.10
 -10  -4   3   55.59    8.20
 -10   4   3   56.29    7.40
  10   4  -3   59.29    5.80
   8  -4  -3 1914.01   39.10
  -8  -4   3 1876.91   49.70
   8   4  -3 1940.41   41.00
  -8   4   3 1839.52   46.20
   6  -4  -3 1497.15   30.30
  -6  -4   3 1413.76   39.20
  -6   4   3 1438.36   33.10
   6   4  -3 1427.76   30.60
   6   4  -3 1522.55   33.20
  -6   4   3 1426.46   37.20
   4  -4  -3 3552.84   64.69
  -4  -4   3 3387.06   73.89
   4  -4  -3 3443.86   68.29
  -4   4   3 3390.96   66.89
   4   4  -3 3502.15   69.29
  -4   4   3 3541.15   65.89
  -4   4   3 3372.46   72.49
   4   4  -3 3342.27   66.99
   2  -4  -3 3798.72   75.59
  -2  -4   3 3717.83   77.09
  -2  -4   3 3650.43   75.89
   2   4  -3 3702.73   73.39
  -2   4   3 3786.52   72.29
   2   4  -3 3780.92   75.29
  -2   4   3 3757.12   77.19
   0  -4  -3 2652.63   57.59
   0  -4   3 2697.73   54.89
   0  -4   3 2570.44   57.39
   0   4  -3 2600.34   54.49
   0   4   3 2658.63   53.79
   0   4  -3 2644.94   56.09
   0   4   3 2611.54   55.79
  -2  -4  -3  896.41   27.10
   2  -4   3  883.91   22.70
   2  -4   3  921.41   27.00
   2  -4   3  934.81   21.70
  -2   4  -3  890.21   24.10
   2   4   3  941.81   23.90
  -2   4  -3  905.11   25.40
   2   4   3  912.11   23.60
   4  -4   3  183.68    6.70
   4  -4   3  168.98    8.20
  -4  -4  -3  175.48   12.00
   4  -4   3  187.88   11.70
  -4   4  -3  186.18   10.50
  -4   4  -3  170.68    9.40
   4   4   3  165.88    8.10
   4   4   3  157.18    9.10
   4   4   3  182.08    5.70
   6  -4   3  201.18    9.40
  -6  -4  -3  198.38   13.80
  -6   4  -3  222.88   12.30
   6   4   3  202.08   11.10
   6   4   3  185.78    8.90
   6   4   3  206.28    7.10
  -6   4  -3  198.88   11.00
   8  -4   3  343.07   13.30
  -8  -4  -3  365.46   19.70
   8   4   3  359.96   13.20
   8   4   3  366.46   11.10
   8   4   3  379.36   16.00
  -8   4  -3  376.26   16.00
  -8   4  -3  365.46   17.20
  10  -4   3   99.99    8.30
 -10  -4  -3  103.39   12.60
 -10   4  -3  108.19   10.00
  10   4   3  108.99    9.80
  10   4   3  107.89    6.70
 -10   4  -3   82.89   10.00
 -12  -4  -3  229.28   18.60
  12  -4   3  206.98   11.90
 -12   4  -3  223.98   14.40
  12   4   3  231.88   10.40
 -12   4  -3  200.78   15.80
 -14  -4  -3   18.90    8.90
  14  -4   3   28.00    6.30
  14   4   3   62.09   11.50
 -14   4  -3   33.50    6.90
  14   4   3   34.20    5.50
 -14   4  -3   35.80    9.30
 -16  -4  -3  295.37   25.40
  16  -4   3  367.56   17.30
  16   4   3  377.06   24.00
  16   4   3  354.66   15.60
 -16   4  -3  301.87   22.00
 -16   4  -3  379.46   20.80
 -18  -4  -3  232.18   23.80
  18  -4   3  230.98   15.30
 -18   4  -3  224.08   21.00
 -18   4  -3  227.48   17.70
  18   4   3  241.08   22.70
  18   4   3  207.98   13.60
  20  -4   3  472.15   22.20
 -20  -4  -3  445.36   32.60
  20   4   3  407.26   19.40
 -20   4  -3  407.66   29.20
  20   4   3  485.75   30.80
 -22  -4  -3   97.39   17.60
  22  -4   3  107.39   13.00
 -22   4  -3  102.39   18.20
  22   4   3   95.99   11.50
  25  -5  -3  392.16   21.70
 -25  -5   3  358.66   29.70
  25   5  -3  338.97   20.50
 -23  -5   3  424.96   31.00
  23  -5  -3  430.96   21.40
  23   5  -3  429.46   20.90
 -21  -5   3  113.79   16.90
  21  -5  -3  156.88   13.20
 -21   5   3  136.59   17.10
  21   5  -3  137.39   12.50
 -19  -5   3   12.60    9.10
  19  -5  -3    5.60    5.10
  19   5  -3    3.80    4.70
 -19   5   3    9.40    6.80
 -17  -5   3   19.00    8.90
  17  -5  -3   16.40    5.10
 -17   5   3   14.70    6.90
  17   5  -3   21.20    5.10
  15  -5  -3  185.78   10.40
 -15  -5   3  188.28   17.70
 -15   5   3  195.58   15.60
  15   5  -3  199.78   10.90
 -13  -5   3  418.76   23.40
  13  -5  -3  417.46   14.70
  13   5  -3  424.46   15.50
 -13   5   3  433.76   21.00
  11  -5  -3    4.50    2.50
 -11  -5   3    6.90    4.20
 -11   5   3    9.10    4.30
  11   5  -3    5.30    2.80
  -9  -5   3  336.57   19.00
   9  -5  -3  369.66   11.90
  -9   5   3  368.36   17.80
  -9   5   3  373.36   15.10
   9   5  -3  367.96   13.30
  -7  -5   3 2989.80   71.19
   7  -5  -3 2991.10   58.49
  -7   5   3 3020.90   68.09
   7   5  -3 2950.80   61.49
  -7   5   3 2907.11   62.19
   5  -5  -3 3725.43   70.69
  -5  -5   3 3745.13   82.59
   5  -5  -3 3719.13   74.09
  -5   5   3 3632.74   73.69
   5   5  -3 3815.72   75.69
   5   5  -3 3652.83   73.59
  -5   5   3 3703.53   80.29
  -5   5   3 3695.23   71.19
   3  -5  -3 3577.14   69.19
   3  -5  -3 3675.93   75.19
  -3  -5   3 3702.43   79.39
  -3   5   3 3658.23   71.59
   3   5  -3 3617.54   73.59
  -3   5   3 3637.54   78.39
   3   5  -3 3726.03   75.19
  -3   5   3 3702.13   71.49
  -1  -5   3 2697.63   58.29
   1  -5  -3 2660.93   58.59
   1   5  -3 2562.64   55.69
   1   5  -3 2612.14   56.89
  -1   5   3 2585.74   54.19
  -1   5   3 2608.44   58.49
   1  -5   3 2888.61   59.49
  -1  -5  -3 2810.12   64.19
   1   5   3 2750.12   60.89
  -1   5  -3 2800.72   60.59
   1   5   3 2877.71   59.59
  -1   5  -3 2911.11   62.09
   3  -5   3   74.99    6.40
  -3  -5  -3   60.39    7.80
   3  -5   3   74.59    5.20
  -3   5  -3   69.19    6.80
   3   5   3   63.79    6.60
  -3   5  -3   58.49    7.00
   3   5   3   51.29    6.10
  -5  -5  -3   27.20    6.20
   5  -5   3   24.00    3.80
   5   5   3   26.60    4.80
  -5   5  -3   27.10    5.20
   5   5   3   36.70    3.20
  -5   5  -3   18.20    4.10
   5   5   3   26.90    3.90
  -7  -5  -3  277.17   17.40
   7  -5   3  279.57   12.10
  -7   5  -3  290.47   14.60
  -7   5  -3  280.57   15.00
   7   5   3  282.87    9.30
   7   5   3  278.77   11.30
   7   5   3  279.57   14.00
   9  -5   3   95.79    8.20
  -9  -5  -3   97.39   12.50
  -9   5  -3   79.59    9.70
   9   5   3  108.49    6.40
   9   5   3  100.59    9.70
  -9   5  -3   95.79    9.80
   9   5   3   96.59    7.30
 -11  -5  -3   14.00    6.80
  11  -5   3   14.70    4.40
 -11   5  -3   16.30    4.80
 -11   5  -3    3.80    5.40
  11   5   3   14.10    3.30
  13  -5   3   26.70    6.10
 -13  -5  -3   29.30    9.40
 -13   5  -3   28.30    8.40
 -13   5  -3   34.20    7.10
  13   5   3   26.10    5.00
  15  -5   3  335.57   16.50
 -15  -5  -3  297.07   25.10
 -15   5  -3  315.37   21.90
 -15   5  -3  330.97   20.10
  15   5   3  300.07   14.10
 -17  -5  -3  530.85   33.90
  17  -5   3  561.14   22.80
 -17   5  -3  587.44   30.60
 -17   5  -3  560.74   26.80
  17   5   3  547.65   20.50
  19  -5   3  771.42   28.30
 -19  -5  -3  735.33   41.60
 -19   5  -3  782.72   33.00
 -19   5  -3  774.62   36.90
  19   5   3  721.03   25.60
  21  -5   3  323.67   19.70
 -21  -5  -3  286.97   30.00
 -21   5  -3  310.77   26.90
  21   5   3  240.58   20.30
 -23  -5  -3  102.09   20.20
  23  -5   3  127.19   14.80
 -23   5  -3  120.99   20.90
 -24  -6   3  348.87   30.30
  24  -6  -3  337.27   19.90
 -24   6   3  325.47   26.30
  24   6  -3  298.97   18.60
  22  -6  -3  343.77   19.10
 -22  -6   3  306.37   28.50
  22   6  -3  322.07   18.20
 -22   6   3  320.17   24.10
 -22   6   3  326.57   24.40
  20  -6  -3   22.30    6.80
 -20  -6   3   28.90   11.90
 -20   6   3   41.10    9.90
  20   6  -3   23.50    6.70
 -20   6   3   17.50    8.60
  18  -6  -3   26.40    6.00
 -18  -6   3   17.50    9.60
 -18   6   3   15.90    7.70
  18   6  -3   15.20    5.50
 -18   6   3   21.00    7.60
  16  -6  -3   36.80    6.00
 -16  -6   3   28.90   10.30
  16   6  -3   32.20    5.90
 -16   6   3   31.70    8.20
 -16   6   3   33.20    8.40
 -14  -6   3   52.99   10.50
  14  -6  -3   42.20    5.60
  14   6  -3   49.70    6.40
 -14   6   3   45.10    7.90
 -14   6   3   38.00    8.10
  12  -6  -3   19.10    3.90
 -12  -6   3   30.00    8.10
 -12   6   3    9.30    5.10
  12   6  -3   18.10    4.30
 -12   6   3   22.90    5.80
 -10  -6   3  108.99   12.90
  10  -6  -3  129.59    7.50
 -10   6   3  123.39   12.40
  10   6  -3  131.19    8.80
 -10   6   3  131.89   10.30
  -8  -6   3  538.55   24.80
   8  -6  -3  537.05   15.50
  -8   6   3  529.15   18.80
  -8   6   3  534.25   22.60
   8   6  -3  535.85   17.80
  -6  -6   3 2289.67   59.29
   6  -6  -3 2293.17   46.60
   6  -6  -3 2329.87   49.70
  -6   6   3 2253.67   46.40
  -6   6   3 2272.77   50.09
   6   6  -3 2273.77   49.70
   6   6  -3 2245.18   50.79
  -6   6   3 2290.77   56.69
   4  -6  -3 3345.87   65.49
   4  -6  -3 3405.06   71.19
  -4  -6   3 3396.46   77.39
   4   6  -3 3389.26   70.99
  -4   6   3 3349.06   75.49
  -4   6   3 3327.37   67.99
  -4   6   3 3369.56   67.09
   4   6  -3 3326.27   69.99
  -2  -6   3 3742.93   82.69
   2  -6  -3 3805.92   81.09
   2   6  -3 3831.12   79.59
  -2   6   3 3789.62   82.79
   2   6  -3 3817.22   78.89
  -2   6   3 3788.42   76.29
  -2   6   3 3856.41   74.69
   0  -6  -3 1719.23   44.90
   0  -6   3 1748.03   42.60
   0   6   3 1696.13   40.00
   0   6  -3 1715.33   42.20
   0   6  -3 1742.93   42.10
   0   6   3 1702.23   43.30
  -2  -6  -3  787.62   28.30
   2  -6   3  797.92   22.70
  -2   6  -3  806.82   25.20
   2   6   3  797.02   23.90
   2   6   3  773.52   24.40
  -2   6  -3  802.72   25.40
   4  -6   3   31.30    5.00
  -4  -6  -3   29.10    7.00
   4  -6   3   35.20    4.40
   4   6   3   34.10    5.00
   4   6   3   26.10    5.10
  -4   6  -3   39.00    6.50
  -4   6  -3   38.80    6.10
   4   6   3   36.50    3.60
  -6  -6  -3   88.69   11.40
   6  -6   3   79.89    7.40
   6   6   3   94.79    5.20
   6   6   3   94.19    7.30
   6   6   3   90.09    8.70
  -6   6  -3   86.69    9.30
  -6   6  -3   85.99    9.50
   8  -6   3    8.50    4.00
  -8  -6  -3    6.60    4.60
   8   6   3   10.20    3.00
   8   6   3   10.20    2.60
  -8   6  -3    9.80    5.10
  -8   6  -3    2.20    3.50
 -10  -6  -3    5.60    5.80
  10  -6   3    3.90    3.60
 -10   6  -3    0.50    4.10
  10   6   3    3.00    2.50
 -10   6  -3    9.60    5.20
 -12  -6  -3   29.60    9.20
  12  -6   3   32.10    6.10
 -12   6  -3   24.60    6.70
 -12   6  -3   28.70    8.10
  12   6   3   24.40    4.70
  14  -6   3  443.16   19.00
 -14  -6  -3  471.15   29.90
  14   6   3  389.16   15.90
 -14   6  -3  438.86   23.60
 -14   6  -3  459.25   25.50
  16  -6   3  381.36   18.90
 -16  -6  -3  393.96   30.20
 -16   6  -3  399.96   23.40
 -16   6  -3  368.66   25.30
  16   6   3  358.96   16.20
  18  -6   3  572.44   24.30
 -18  -6  -3  599.34   38.60
 -18   6  -3  605.24   32.90
 -18   6  -3  610.34   29.70
  20  -6   3  310.77   19.30
 -20  -6  -3  298.47   30.60
 -20   6  -3  284.17   22.50
 -20   6  -3  326.67   27.60
 -22  -6  -3   85.09   19.40
  22  -6   3   82.89   12.00
 -22   6  -3   97.09   18.30
  25  -7  -3   25.20    9.00
 -25   7   3   43.60   14.20
  25   7  -3   33.00    8.30
 -23  -7   3   67.39   16.50
  23  -7  -3   58.79   10.20
 -23   7   3   55.29   11.70
 -23   7   3   51.69   12.40
  23   7  -3   63.29    9.70
  21  -7  -3   39.60    9.10
 -21  -7   3   44.20   14.30
 -21   7   3   38.00   10.40
 -21   7   3   43.60   12.50
 -19  -7   3  260.97   26.00
  19  -7  -3  232.28   15.10
  19   7  -3  236.28   15.00
 -19   7   3  226.38   21.30
 -19   7   3  195.98   19.00
 -17  -7   3  142.79   18.30
  17  -7  -3  152.48   11.70
  17   7  -3  146.99   11.90
 -17   7   3  143.29   18.20
 -17   7   3  121.79   14.20
 -15  -7   3  127.29   16.90
  15  -7  -3  157.58   10.70
 -15   7   3  151.98   14.70
  15   7  -3  145.09   11.20
 -15   7   3  155.78   17.30
 -13  -7   3  110.29   14.50
  13  -7  -3  158.68    9.70
 -13   7   3  152.08   16.00
 -13   7   3  151.08   13.20
  13   7  -3  152.28   10.60
  11  -7  -3  227.68   10.70
 -11  -7   3  240.68   19.50
 -11   7   3  213.98   14.10
 -11   7   3  235.58   17.40
  11   7  -3  225.88   12.10
  -9  -7   3   79.59   11.40
   9  -7  -3  127.39    7.60
  -9   7   3  114.99   12.90
  -9   7   3  114.49   10.00
   9   7  -3   96.39    8.80
   7  -7  -3  261.77   10.30
  -7  -7   3  229.98   17.20
  -7   7   3  248.88   16.40
   7   7  -3  267.37   12.90
  -7   7   3  246.08   12.40
   7   7  -3  249.78   12.10
   5  -7  -3  285.07   10.80
   5  -7  -3  308.67   14.00
  -5  -7   3  294.07   17.60
   5   7  -3  298.67   13.80
  -5   7   3  288.67   16.90
   5   7  -3  298.77   13.60
  -5   7   3  276.57   12.50
  -3  -7   3  326.17   17.40
   3  -7  -3  336.57   15.60
  -3   7   3  312.37   17.10
   3   7  -3  299.47   14.20
   3   7  -3  320.37   14.50
  -3   7   3  305.17   12.20
   1  -7  -3  390.96   18.20
  -1  -7   3  374.76   17.60
   1   7  -3  367.96   16.20
  -1   7   3  372.56   12.80
   1   7  -3  369.46   16.30
  -1   7   3  363.66   18.00
  -1   7   3  371.06   14.60
   1  -7   3  754.82   24.30
  -1  -7  -3  744.53   27.80
   1   7   3  724.23   25.60
   1   7   3  715.63   19.00
  -1   7  -3  734.73   24.90
  -1   7  -3  715.63   24.40
   1   7   3  716.73   23.00
  -3  -7  -3   17.40    6.40
   3  -7   3   15.00    3.80
  -3   7  -3   27.30    6.10
   3   7   3   18.20    3.00
  -3   7  -3   16.20    4.40
   3   7   3   13.50    4.30
  -5  -7  -3  224.88   17.60
   5  -7   3  256.47   12.80
   5   7   3  233.78   12.90
  -5   7  -3  248.08   15.00
   5   7   3  237.38    8.90
  -5   7  -3  251.77   15.10
   7  -7   3  151.18   10.60
  -7  -7  -3  129.09   15.00
   7   7   3  137.69    9.50
   7   7   3  131.19    6.90
  -7   7  -3  133.59   12.40
  -7   7  -3  134.39   12.60
   9  -7   3  298.57   14.90
  -9  -7  -3  313.37   22.60
  -9   7  -3  329.17   19.10
  -9   7  -3  311.67   18.80
   9   7   3  311.37   11.70
  11  -7   3  278.57   15.20
 -11  -7  -3  287.77   23.50
  11   7   3  280.57   12.10
 -11   7  -3  266.97   19.10
 -11   7  -3  295.07   19.50
  13  -7   3  238.38   14.90
 -13  -7  -3  229.98   23.60
 -13   7  -3  234.68   19.80
 -13   7  -3  255.17   19.30
 -15  -7  -3  279.67   27.40
  15  -7   3  273.67   16.40
 -15   7  -3  305.17   23.00
 -15   7  -3  280.47   20.90
  17  -7   3   95.49   11.40
 -17  -7  -3   98.49   19.40
 -17   7  -3   85.69   12.40
 -17   7  -3  132.69   18.60
 -19  -7  -3   75.59   17.90
  19  -7   3   76.89   10.90
 -19   7  -3   86.09   15.70
 -19   7  -3   62.79   11.30
 -21  -7  -3    7.30   12.50
  21  -7   3   14.00    8.10
 -21   7  -3   20.50   12.50
 -21   7  -3   22.90    8.60
 -24  -8   3   37.00   14.70
  24  -8  -3   23.20    8.10
  24   8  -3   11.20    6.80
 -24   8   3    8.00   10.90
 -24   8   3   10.60   11.20
 -22  -8   3    3.00   11.50
  22  -8  -3   -1.40    6.00
 -22   8   3   -1.00    8.30
 -22   8   3    3.60    9.60
  22   8  -3    7.30    6.00
  20  -8  -3   26.40    7.60
 -20  -8   3   38.40   14.60
 -20   8   3   23.60    9.50
 -20   8   3   28.10   10.80
  20   8  -3   29.20    7.20
  18  -8  -3  541.85   21.90
 -18  -8   3  604.64   36.70
 -18   8   3  527.45   27.90
  18   8  -3  566.14   22.80
 -18   8   3  564.24   31.20
  16  -8  -3  433.86   18.50
 -16  -8   3  457.65   31.20
  16   8  -3  426.16   19.20
 -16   8   3  407.36   23.80
 -16   8   3  455.15   27.40
  14  -8  -3  560.14   19.90
 -14  -8   3  567.74   32.70
  14   8  -3  537.65   20.90
 -14   8   3  554.04   25.50
 -14   8   3  594.04   30.20
  12  -8  -3  467.35   16.90
 -12  -8   3  418.46   27.40
  12   8  -3  467.15   18.60
 -12   8   3  453.35   21.40
 -12   8   3  492.85   26.40
  10  -8  -3  212.08   10.80
 -10  -8   3  184.88   18.90
  10   8  -3  213.98   12.90
 -10   8   3  233.48   17.90
 -10   8   3  229.48   14.20
   8  -8  -3    3.90    3.00
  -8  -8   3    2.90    5.90
  -8   8   3    5.90    4.90
   8   8  -3    6.30    3.80
   8   8  -3    9.70    4.60
  -8   8   3    4.10    3.60
   6  -8  -3   80.39    6.90
   6  -8  -3   77.99    8.20
  -6  -8   3   66.49   10.10
  -6   8   3   78.29    8.30
   6   8  -3   91.99    9.00
  -6   8   3   91.99   12.00
   6   8  -3   83.79    9.10
   4  -8  -3  175.78   12.10
  -4  -8   3  180.18   14.60
  -4   8   3  173.78   10.20
   4   8  -3  182.18   11.80
   4   8  -3  177.68   11.70
  -4   8   3  177.58   14.40
  -2  -8   3  193.48   13.90
   2  -8  -3  183.58   13.20
   2   8  -3  184.18   12.00
  -2   8   3  176.88    9.50
   2   8  -3  188.48   12.30
  -2   8   3  175.88   14.10
   0  -8   3    8.40    3.90
   0  -8  -3    0.40    3.40
   0   8  -3    3.40    3.20
   0   8  -3   -1.70    3.10
   0   8   3   -0.10    3.90
   0   8   3    1.60    2.30
   2  -8   3   11.00    4.00
  -2  -8  -3   15.40    6.10
  -2   8  -3   10.20    4.90
   2   8   3   14.30    5.20
   2   8   3   12.00    3.20
  -2   8  -3   16.90    5.10
   4  -8   3   23.90    4.70
  -4  -8  -3   13.80    6.40
  -4   8  -3   17.10    5.30
   4   8   3   20.70    5.70
   4   8   3   24.90    3.70
  -4   8  -3   15.90    6.00
   6  -8   3  784.82   25.50
  -6  -8  -3  789.82   34.80
  -6   8  -3  786.62   29.70
   6   8   3  767.82   25.90
   6   8   3  761.02   24.90
  -6   8  -3  752.12   28.70
  -8  -8  -3 1046.20   42.80
   8  -8   3 1066.39   31.90
  -8   8  -3 1050.79   36.60
  -8   8  -3 1054.09   36.40
 -10  -8  -3  505.45   31.00
  10  -8   3  530.75   21.30
 -10   8  -3  490.75   25.80
 -10   8  -3  566.24   26.70
 -12  -8  -3  375.16   29.90
  12  -8   3  398.26   19.20
 -12   8  -3  420.26   24.60
 -12   8  -3  403.66   24.10
  14  -8   3  117.29   13.10
 -14  -8  -3   93.59   17.20
 -14   8  -3  118.89   16.10
 -14   8  -3  102.09   13.50
 -16  -8  -3   -8.80   11.40
  16  -8   3    4.00    5.90
 -16   8  -3   -4.90    6.20
 -16   8  -3   12.40    9.40
 -18  -8  -3   13.00   12.70
  18  -8   3    3.00    6.40
 -18   8  -3    7.30    8.40
 -18   8  -3   14.10    9.70
 -20  -8  -3   30.90   14.80
  20  -8   3   44.00    9.80
 -20   8  -3   46.50   13.60
 -20   8  -3   45.00   10.80
 -21  -9   3  -11.70   10.10
  21  -9  -3   -2.90    5.20
 -21   9   3   -8.40    7.50
  21   9  -3   -6.60    5.10
 -21   9   3   -0.10    9.20
 -19  -9   3   75.09   16.80
  19  -9  -3   87.29   10.40
 -19   9   3   63.09   12.80
  19   9  -3   85.79   10.40
 -19   9   3   92.19   14.60
 -17  -9   3  429.66   32.50
  17  -9  -3  401.36   18.70
  17   9  -3  423.96   20.00
 -17   9   3  424.36   25.10
 -17   9   3  432.06   28.20
 -15  -9   3  748.13   39.50
  15  -9  -3  755.42   25.00
 -15   9   3  730.93   31.20
 -15   9   3  775.92   35.80
  15   9  -3  753.82   26.60
  13  -9  -3  576.54   20.60
 -13  -9   3  601.84   34.00
 -13   9   3  564.34   25.60
 -13   9   3  571.54   30.80
  13   9  -3  558.74   22.20
 -11  -9   3  609.24   33.00
  11  -9  -3  620.14   20.80
  11   9  -3  621.04   23.10
 -11   9   3  648.94   31.50
 -11   9   3  639.44   25.20
  -9  -9   3   -3.00    5.80
   9  -9  -3   -2.30    3.00
  -9   9   3   -1.60    4.20
  -9   9   3   -1.90    5.00
   9   9  -3    3.20    4.80
   7  -9  -3  216.78   11.00
  -7  -9   3  215.08   18.70
  -7   9   3  215.28   17.50
  -7   9   3  208.08   12.70
   7   9  -3  206.08   13.40
   7   9  -3  206.48   13.50
  -5  -9   3  296.57   20.20
   5  -9  -3  313.87   16.80
   5   9  -3  302.07   16.40
  -5   9   3  324.87   20.30
   5   9  -3  304.97   16.20
  -5   9   3  313.17   14.50
   3  -9  -3  300.77   17.20
  -3  -9   3  285.17   18.70
   3   9  -3  277.37   15.50
  -3   9   3  273.37   12.80
   3   9  -3  267.37   15.70
  -3   9   3  289.17   18.80
   1  -9  -3  163.98   13.90
  -1  -9   3  166.08   13.90
  -1   9   3  172.38    9.80
   1   9  -3  175.58   13.50
   1   9  -3  158.88   12.60
  -1   9   3  164.48   15.00
  -1  -9  -3    9.20    5.80
   1  -9   3    3.70    4.30
  -1   9  -3    0.50    3.70
  -1   9  -3    3.70    4.70
   1   9   3    0.50    4.20
   3  -9   3   19.70    5.60
  -3  -9  -3   21.30    7.40
   3   9   3    8.90    5.30
  -3   9  -3   17.40    6.00
  -3   9  -3   12.90    5.90
  -5  -9  -3  468.85   26.80
  -5   9  -3  428.26   22.10
   5   9   3  432.16   20.90
  -5   9  -3  458.35   23.00
  -7  -9  -3  915.71   39.80
  -7   9  -3  856.51   33.30
  -7   9  -3  852.81   32.60
   9  -9   3  512.85   22.50
  -9  -9  -3  511.95   32.20
  -9   9  -3  553.34   26.90
  -9   9  -3  520.35   26.30
  11  -9   3  429.86   20.40
 -11  -9  -3  390.06   31.00
 -11   9  -3  438.76   25.10
 -11   9  -3  391.26   24.00
  13  -9   3    6.50    6.00
 -13  -9  -3    1.60   10.90
 -13   9  -3    6.70    7.80
 -13   9  -3    1.20    6.60
  15  -9   3   29.60    8.60
 -15  -9  -3   18.30   13.00
 -15   9  -3   25.20    8.90
 -15   9  -3   37.60   11.20
  17  -9   3   99.49   12.50
 -17  -9  -3   97.39   20.20
 -17   9  -3   84.19   13.70
 -17   9  -3  114.19   16.50
 -19  -9  -3   67.29   18.40
  19  -9   3   59.19   11.10
 -19   9  -3   67.69   13.30
 -19   9  -3   88.49   16.30
 -20 -10   3   -5.70   11.80
  20 -10  -3    3.60    5.80
 -20  10   3    3.60    8.40
  20  10  -3   12.50    6.70
 -20  10   3   21.60    9.80
  18 -10  -3   16.80    6.10
 -18 -10   3   16.00   12.80
 -18  10   3    7.90    8.40
  18  10  -3    8.30    6.30
 -18  10   3   22.40    9.20
 -16 -10   3   35.10   13.20
  16 -10  -3   47.10    7.80
 -16  10   3   40.10   11.60
  16  10  -3   42.40    8.20
 -16  10   3   53.79   11.10
 -14 -10   3  121.29   18.20
  14 -10  -3  128.29   11.60
 -14  10   3  147.49   18.90
 -14  10   3  151.08   15.70
  14  10  -3  130.89   12.50
  12 -10  -3   65.39    8.30
 -12 -10   3   55.29   12.60
  12  10  -3   58.99    8.60
 -12  10   3   49.00   11.00
 -12  10   3   62.69   10.60
 -10 -10   3   24.10    9.70
  10 -10  -3    9.80    5.10
 -10  10   3   20.40    7.20
  10  10  -3    9.30    5.60
 -10  10   3    6.40    8.40
  -8 -10   3    2.50    6.50
  -8  10   3   -2.00    4.90
  -8  10   3   -8.10    5.80
   8  10  -3   -2.00    4.80
  -6 -10   3  393.46   24.70
   6  10  -3  388.76   19.50
  -6  10   3  413.86   24.80
  -6  10   3  368.66   17.40
   6  10  -3  388.26   19.50
   4 -10  -3    7.00    5.20
  -4 -10   3   -0.90    5.30
  -4  10   3    5.40    5.80
   4  10  -3    7.70    5.50
   4  10  -3    2.80    4.60
   2 -10  -3   85.59   11.80
  -2 -10   3  103.59   13.00
   2  10  -3  119.89   12.20
   2  10  -3   99.09   12.60
  -2  10   3   90.19   12.00
   0 -10  -3   19.20    7.50
   0 -10   3    5.40    5.90
   0  10  -3    8.80    6.00
   0  10  -3   14.10    6.10
   0  10   3   12.40    6.90
  -2 -10  -3    8.90    7.30
  -2  10  -3   10.70    6.40
  -2  10  -3    1.80    5.10
   2  10   3    2.00    5.10
  -4 -10  -3   93.19   14.30
   4  10   3  131.59   14.10
  -4  10  -3  113.59   14.10
  -4  10  -3  108.89   12.60
  -6 -10  -3  109.79   16.10
  -6  10  -3  144.49   15.30
  -6  10  -3  160.78   16.10
  -8 -10  -3   45.40   12.60
  -8  10  -3   33.20    8.30
  -8  10  -3   60.79   10.90
 -10 -10  -3   48.60   14.30
  10 -10   3   54.59    9.60
 -10  10  -3   48.60    9.90
 -10  10  -3   63.89   11.90
  12 -10   3   17.30    8.20
 -12 -10  -3    5.70   10.40
 -12  10  -3   21.20    8.80
 -12  10  -3   11.40    9.30
  14 -10   3    5.20    7.00
 -14 -10  -3   -2.30    9.60
 -14  10  -3    4.40    8.70
 -14  10  -3    6.00    7.10
 -16 -10  -3    9.00   12.50
  16 -10   3   18.40    8.50
 -16  10  -3   23.60    9.30
 -16  10  -3   17.50   11.80
 -18 -10  -3   43.00   17.40
  18 -10   3   46.20   10.90
 -18  10  -3   37.40   11.40
 -18  10  -3   44.70   14.60
  19 -11  -3   57.79   10.00
 -19 -11   3   36.20   15.80
 -19  11   3   36.30   11.80
 -19  11   3   58.39   12.70
 -17 -11   3   56.89   16.40
  17 -11  -3   93.99   11.20
 -17  11   3   79.69   14.30
 -17  11   3   74.29   13.10
  15 -11  -3   35.00    7.10
 -15 -11   3   28.40   13.30
 -15  11   3   29.40   10.20
 -15  11   3   41.20    9.80
  15  11  -3   19.30    7.20
  13 -11  -3   51.19    7.90
 -13 -11   3   29.60   11.50
 -13  11   3   49.99    9.80
 -13  11   3   27.50    9.40
  13  11  -3   29.40    7.10
  11 -11  -3    7.60    4.90
 -11 -11   3    5.90    8.20
 -11  11   3    5.40    5.70
 -11  11   3    6.30    7.10
  11  11  -3   -0.50    5.10
  -9 -11   3   35.90   11.50
   9  11  -3   42.30    8.40
  -9  11   3   31.40    9.90
  -7 -11   3   73.69   13.20
  -7  11   3   56.39   12.10
   7  11  -3   69.69    9.80
  -5 -11   3  183.08   18.80
  -5  11   3  162.18   19.50
   5  11  -3  162.58   14.30
   5  11  -3  169.78   14.40
  -3 -11   3   -6.00    5.50
  -3  11   3   -8.10    6.20
   3  11  -3   -2.30    4.90
   3  11  -3    1.70    5.50
  -1 -11   3  169.28   17.20
   1 -11  -3  198.88   18.10
  -1  11   3  229.78   19.90
   1  11  -3  178.78   15.10
   1  11  -3  174.18   16.90
  -1 -11  -3   15.50    8.10
  -1  11  -3   18.00    6.90
   1  11   3   11.80    6.70
  -1  11  -3    6.00    5.70
  -3 -11  -3   15.70    8.60
  -3  11  -3    8.70    5.60
   3  11   3   10.60    6.00
  -3  11  -3    4.60    6.00
  -5 -11  -3   35.80   11.80
  -5  11  -3   36.20    8.60
  -5  11  -3   27.90    8.30
  -7 -11  -3  207.08   23.40
  -7  11  -3  223.88   19.60
  -7  11  -3  212.38   18.30
  -9 -11  -3   26.50   11.50
  -9  11  -3   37.30    9.10
  -9  11  -3   34.90   10.20
 -11 -11  -3  268.47   27.70
 -11  11  -3  312.67   23.80
 -11  11  -3  264.17   22.70
  13 -11   3   25.30    8.80
 -13 -11  -3   35.00   14.90
 -13  11  -3   34.40   10.40
 -13  11  -3   23.40   10.30
 -15 -11  -3    1.80   13.50
  15 -11   3    7.10    8.20
 -15  11  -3   12.10   11.50
 -15  11  -3   10.50    9.10
 -16 -12   3  390.36   34.80
 -16  12   3  429.76   32.00
 -14 -12   3  382.86   32.30
 -14  12   3  355.16   29.30
 -12 -12   3  294.87   27.90
 -12  12   3  312.17   26.90
 -10 -12   3   16.60   10.80
 -10  12   3   16.30   10.10
  10  12  -3   15.40    7.10
  -8 -12   3    8.40    9.00
   8  12  -3    3.80    5.70
  -8  12   3    8.20    7.90
  -6 -12   3   43.40   11.60
   6  12  -3   35.30    8.00
  -6  12   3   28.40   10.20
  -4 -12   3  106.79   15.30
  -4  12   3  123.89   16.90
   4  12  -3  123.09   14.70
   4  12  -3  123.19   13.70
  -2 -12   3   61.79   11.30
   2  12  -3   59.69   10.10
  -2  12   3   48.40   12.00
   2  12  -3   73.39   10.60
   0 -12  -3   26.40    9.70
   0  12  -3   34.50    9.10
   0  12   3   30.50    9.00
   0  12  -3   24.20    7.80
  -2 -12  -3   -1.90    6.70
  -2  12  -3   -8.30    5.10
  -2  12  -3   -0.30    5.40
   2  12   3   -3.50    5.40
  -4 -12  -3  108.69   16.60
  -4  12  -3  107.09   13.40
  -4  12  -3   81.59   12.10
  -6 -12  -3  369.66   29.10
  -6  12  -3  366.46   22.90
  -6  12  -3  379.86   25.60
  -8 -12  -3  359.76   30.90
  -8  12  -3  388.26   26.30
  -8  12  -3  345.27   23.70
 -10 -12  -3  513.55   36.70
 -10  12  -3  520.15   31.30
 -10  12  -3  482.85   28.70
 -12 -12  -3  169.98   24.70
 -12  12  -3  184.88   23.30
 -12  12  -3  201.28   21.70
 -14 -12  -3    9.00   14.10
 -14  12  -3   23.00   11.80
 -14  12  -3   -1.40   10.80
 -15 -13   3  296.57   32.40
 -15  13   3  342.57   30.30
 -13 -13   3  155.28   22.20
 -13  13   3  134.19   19.20
 -11 -13   3   97.09   18.00
 -11  13   3  111.49   16.90
  -9 -13   3   21.00   11.70
  -9  13   3   11.70    9.80
  -7 -13   3   -3.20    7.90
  -7  13   3   -0.20    7.20
  -5 -13   3   51.89   12.40
   5  13  -3   49.20    9.70
  -5  13   3   51.99   12.80
  -3 -13   3   70.59   14.40
  -3  13   3   53.89   13.10
   3  13  -3   58.59   10.60
   3  13  -3   66.39   10.50
   1  13  -3   27.20    8.30
  -1  13   3   24.80   10.20
   1  13  -3   29.50    8.30
  -1 -13  -3   14.70    8.60
  -1  13  -3   21.10    8.00
  -1  13  -3   18.10    8.50
   1  13   3   17.10    8.40
  -3 -13  -3   69.29   15.20
  -3  13  -3   75.39   12.20
  -3  13  -3   61.19   11.70
  -5 -13  -3  142.89   21.00
  -5  13  -3  178.48   19.90
  -5  13  -3  155.78   17.40
  -7 -13  -3  297.97   30.40
  -7  13  -3  286.27   22.50
  -7  13  -3  282.37   24.50
  -9 -13  -3  143.19   22.10
  -9  13  -3  205.58   23.60
  -9  13  -3  192.08   21.00
 -11 -13  -3  140.79   23.40
 -11  13  -3  121.79   16.80
 -11  13  -3  133.69   18.90
 -12 -14   3   22.70   13.30
 -12  14   3   26.40   11.30
 -10 -14   3   32.20   13.60
 -10  14   3   43.70   13.30
  -8 -14   3   47.10   13.70
  -8  14   3   54.79   14.00
  -6 -14   3   57.89   13.60
  -6  14   3   60.09   13.70
  -4  14   3  142.19   19.00
   2  14  -3   -0.20    6.60
  -2  14   3   -0.90    9.20
   0  14  -3  138.89   18.50
   0  14   3  172.38   22.30
   0  14  -3  146.29   18.10
  -2  14  -3   31.00    8.90
  -2  14  -3   26.20    9.70
  -4 -14  -3  138.69   20.50
  -4  14  -3  167.28   20.50
  -4  14  -3  128.09   15.50
  -6 -14  -3   24.30   13.30
  -6  14  -3   41.00   11.10
  -6  14  -3   34.60   11.20
  -8 -14  -3   61.79   17.30
  -8  14  -3   59.39   14.00
  -8  14  -3   85.19   14.40
  -5  15   3  316.27   30.70
  -3  15   3  425.06   32.50
   1  15  -3   91.89   15.40
  -1  15   3  106.89   16.40
  -1  15  -3  114.89   15.80
  -3  15  -3   18.70    9.90
  28   0  -4   81.89   12.20
  28   0  -4   72.69   19.10
  26   0  -4   13.80    7.30
  24   0  -4  162.48   14.20
  22   0  -4   90.69   10.50
 -20   0   4 1137.29   38.90
  20   0  -4 1115.59   31.90
  18   0  -4  400.66   16.20
 -18   0   4  412.06   18.50
  16   0  -4   51.19    6.00
 -16   0   4   69.29    8.30
 -14   0   4  217.78   11.70
  14   0  -4  200.88    9.90
 -12   0   4   26.50    3.50
 -12   0   4   31.20    4.60
  12   0  -4   29.40    4.00
 -10   0   4 1751.02   38.40
  10   0  -4 1909.31   39.00
 -10   0   4 1905.91   41.40
  -8   0   4  461.45   13.00
   8   0  -4  473.25   12.60
  -8   0   4  482.45   14.10
  -6   0   4 3659.23   72.39
  -6   0   4 3914.51   73.19
   6   0  -4 3829.82   71.39
  -4   0   4 1677.33   35.50
   4   0  -4 1756.12   33.80
  -4   0   4 1714.63   35.10
  -2   0   4  209.08    8.10
   2   0  -4  197.28    6.50
  -2   0   4  215.78    7.40
   0   0  -4 3746.23   70.89
   0   0   4 3868.41   71.49
   0   0   4 3588.74   72.59
   2   0   4 2347.47   48.00
   2   0   4 2205.18   43.70
  -2   0  -4 2223.68   45.90
   2   0   4 2283.37   45.60
  -4   0  -4 4436.86   86.79
   4   0   4 4404.96   83.39
   4   0   4 4514.75   85.49
   4   0   4 4417.16   87.69
  -6   0  -4 5256.47  101.39
   6   0   4 5054.29   98.29
   6   0   4 5088.29  100.89
  -6   0  -4 5159.68  102.99
   6   0   4 5077.69   96.59
  -6   0  -4 5112.39   98.59
   8   0   4  122.59    7.50
  -8   0  -4  120.39    7.60
   8   0   4  132.39    9.10
  -8   0  -4  125.09    9.60
   8   0   4  106.09    6.50
  10   0   4   39.10    5.90
  10   0   4   40.20    4.90
  10   0   4   47.10    5.80
 -10   0  -4   46.10    6.10
 -10   0  -4   41.90    6.50
 -12   0  -4  848.02   29.50
 -12   0  -4  798.22   23.60
  12   0   4  772.62   22.30
  12   0   4  790.92   24.00
  12   0   4  797.52   26.30
 -14   0  -4  811.02   30.90
  14   0   4  802.72   23.60
 -14   0  -4  784.12   24.40
  14   0   4  771.72   27.00
  14   0   4  772.52   25.00
 -16   0  -4   93.59   12.40
  16   0   4  107.59   10.00
  18   0   4   18.80    6.40
  20   0   4   -6.90    5.50
  22   0   4   -9.90    5.50
 -22   0  -4   -3.80    8.70
  24   0   4   30.50    9.30
 -24   0  -4   24.80   13.40
  27  -1  -4   26.40    8.80
  27   1  -4   34.50   15.50
  27   1  -4   25.70    8.70
  25  -1  -4   10.50    6.60
  25   1  -4    6.80   11.70
  25   1  -4    6.90    7.00
  23  -1  -4  140.49   12.90
  23   1  -4  129.69   12.80
  23   1  -4  133.99   18.70
 -21  -1   4  132.19   14.20
  21  -1  -4  111.39   11.10
  21   1  -4  114.99   11.20
  19  -1  -4  278.57   14.00
 -19  -1   4  255.17   17.20
  19   1  -4  265.17   13.70
  17  -1  -4  130.99    9.40
 -17  -1   4  136.59   12.30
 -17   1   4  147.29   10.90
  17   1  -4  140.99    9.80
 -17   1   4  147.49   10.10
 -15  -1   4   23.50    5.90
  15  -1  -4   24.90    4.60
 -15   1   4   22.30    4.70
  15   1  -4   24.70    4.50
 -15   1   4   22.50    4.30
 -13  -1   4    7.00    3.60
  13  -1  -4   12.20    3.00
 -13   1   4    5.10    3.10
 -13   1   4    7.10    2.80
  13   1  -4    8.40    3.00
 -11  -1   4  312.97   13.90
  11  -1  -4  308.77   10.70
 -11   1   4  311.07   10.90
 -11   1   4  283.67   12.00
  11   1  -4  317.57   11.00
   9  -1  -4  920.51   21.20
  -9  -1   4  933.81   25.30
   9   1  -4  928.41   21.80
   9   1  -4  877.01   24.80
  -9   1   4  955.30   21.60
  -9   1   4  884.11   22.90
   7  -1  -4 1278.37   26.10
  -7  -1   4 1208.88   26.00
  -7  -1   4 1239.08   29.70
  -7   1   4 1271.97   26.60
   7   1  -4 1270.57   26.90
   7   1  -4 1253.97   29.40
  -7   1   4 1160.48   28.00
  -5  -1   4 3460.35   67.79
   5  -1  -4 3490.75   64.19
  -5  -1   4 3360.76   65.89
  -5   1   4 3393.26   67.39
  -5   1   4 3474.15   65.59
   5   1  -4 3482.95   65.69
  -3  -1   4  400.06   11.70
  -3  -1   4  404.26   12.10
   3  -1  -4  420.86    9.30
  -3   1   4  430.86   11.30
  -3   1   4  405.26   12.20
   3   1  -4  414.36   11.30
  -1  -1   4  360.36   11.80
  -1  -1   4  371.36   10.50
  -1   1   4  353.46   10.40
   1   1  -4  370.36   10.90
  -1   1   4  346.87   11.30
   1  -1   4 1230.18   28.80
   1  -1   4 1278.87   26.40
  -1  -1  -4 1196.98   25.00
   1  -1   4 1171.78   25.70
   1   1   4 1165.68   23.70
  -1   1  -4 1209.18   27.70
   1   1   4 1221.78   26.80
   1   1   4 1192.38   27.70
   1   1   4 1237.78   25.70
  -3  -1  -4  584.14   15.60
   3  -1   4  604.54   15.10
  -3  -1  -4  619.14   19.10
   3  -1   4  607.94   18.20
   3  -1   4  641.54   15.70
   3   1   4  610.64   17.50
   3   1   4  586.34   16.20
  -3   1  -4  598.64   17.50
   3   1   4  609.04   13.70
  -3   1  -4  584.54   16.30
   5  -1   4  855.01   20.60
   5  -1   4  869.21   24.50
   5  -1   4  880.61   21.00
  -5  -1  -4  899.61   25.90
   5   1   4  848.62   22.00
   5   1   4  856.81   19.40
  -5   1  -4  892.61   24.20
   5   1   4  870.21   23.30
  -5   1  -4  853.21   22.10
  -7  -1  -4   10.30    2.60
   7  -1   4   20.00    3.00
   7  -1   4   17.40    3.20
  -7  -1  -4   20.30    4.70
   7  -1   4   13.80    4.40
  -7   1  -4   17.40    3.50
   7   1   4   13.40    2.90
  -7   1  -4   23.80    4.20
  -7   1  -4   17.90    4.80
   7   1   4   23.10    3.70
   7   1   4   17.10    3.60
  -9  -1  -4  214.48   13.50
   9  -1   4  211.98    9.30
  -9  -1  -4  207.58    9.60
   9  -1   4  221.58   12.70
   9  -1   4  194.18    9.50
   9   1   4  203.88   10.90
   9   1   4  191.58    8.70
  -9   1  -4  200.58   10.50
  -9   1  -4  211.58   12.70
  -9   1  -4  196.68   12.00
   9   1   4  202.48   10.50
 -11  -1  -4  553.84   23.70
  11  -1   4  546.15   17.20
  11  -1   4  541.65   21.20
  11  -1   4  502.35   17.30
 -11  -1  -4  545.45   17.30
 -11   1  -4  495.95   20.90
 -11   1  -4  508.75   21.80
 -11   1  -4  542.15   18.90
  11   1   4  547.95   16.70
  11   1   4  526.85   19.20
  11   1   4  536.15   19.00
  13  -1   4  644.14   24.50
 -13  -1  -4  651.63   27.60
  13  -1   4  614.84   19.80
 -13  -1  -4  589.94   19.40
  13  -1   4  585.64   20.10
  13   1   4  639.94   22.20
 -13   1  -4  613.54   21.40
 -13   1  -4  585.74   24.40
  13   1   4  656.73   19.70
  13   1   4  569.84   21.60
 -13   1  -4  585.54   25.10
  15  -1   4  272.17   13.90
  15  -1   4  263.07   14.70
 -15  -1  -4  277.07   20.10
 -15   1  -4  229.68   16.30
 -15   1  -4  286.17   19.00
  15   1   4  243.48   14.80
  15   1   4  262.07   13.30
 -15   1  -4  264.07   14.80
 -17  -1  -4   10.60    8.20
  17  -1   4   16.50    5.60
  17   1   4   11.10    5.30
 -17   1  -4   24.70    8.40
  19  -1   4    3.60    5.80
  19   1   4    9.80    5.70
 -19   1  -4   10.50    8.30
  21  -1   4   -7.50    6.00
 -21   1  -4    7.00    8.90
  21   1   4    5.60    6.30
  23  -1   4   -2.00    6.50
  23   1   4    2.30   12.80
 -23   1  -4   -4.60    9.80
  23   1   4   -2.10    6.60
  28  -2  -4   12.00    8.50
  28   2  -4   17.00    8.30
  28   2  -4   36.70   16.10
  26  -2  -4    3.50    6.90
  26   2  -4    3.70   11.40
  26   2  -4    3.60    6.30
  24  -2  -4   42.50    8.70
  24   2  -4   46.40   14.20
  24   2  -4   40.70    8.20
 -22  -2   4    5.60    6.70
  22  -2  -4   18.50    5.80
  22   2  -4   12.70    9.70
  22   2  -4   10.00    5.40
 -20  -2   4  122.99   14.90
  20  -2  -4  114.79   10.50
  20   2  -4  123.19   10.80
  20   2  -4  104.19   15.90
  18  -2  -4   41.30    6.10
 -18  -2   4   34.40    8.00
  18   2  -4   40.50    6.10
  18   2  -4   32.10    9.60
 -18   2   4   37.20    6.60
  16  -2  -4   26.00    4.80
 -16  -2   4   21.00    6.30
 -16   2   4   13.50    3.50
 -16   2   4   22.40    5.20
  16   2  -4   20.80    4.60
  16   2  -4   11.60    6.50
  14  -2  -4   15.20    3.90
 -14  -2   4   21.30    6.10
  14   2  -4   24.10    7.30
 -14   2   4   16.50    4.90
 -14   2   4   12.70    3.10
  14   2  -4   25.20    4.30
  12  -2  -4   65.79    5.90
 -12  -2   4   86.99    9.30
  12   2  -4   78.79    9.30
  12   2  -4   77.49    6.40
 -12   2   4   92.19    5.60
 -12   2   4   63.89    8.30
 -10  -2   4  158.98   10.70
  10  -2  -4  142.59    6.80
 -10   2   4  152.58    6.20
 -10   2   4  154.68    9.40
  10   2  -4  145.39   10.00
  10   2  -4  141.99    7.40
  -8  -2   4  472.45   17.20
   8  -2  -4  464.15   12.40
  -8   2   4  492.25   12.20
   8   2  -4  467.65   13.40
  -8   2   4  459.05   15.80
  -6  -2   4 2176.58   41.90
  -6  -2   4 2107.29   46.30
   6  -2  -4 2018.40   40.00
  -6   2   4 2164.88   41.10
  -6   2   4 1923.11   44.30
   6   2  -4 2050.19   42.30
   4  -2  -4 1843.52   34.90
  -4  -2   4 1843.32   40.20
  -4  -2   4 1864.71   38.60
  -4   2   4 1866.71   37.10
  -4   2   4 1781.62   39.90
   4   2  -4 1864.61   38.60
  -2  -2   4  107.19    5.70
  -2  -2   4   95.39    6.00
   2   2  -4   96.29    5.80
  -2   2   4  106.49    6.20
   2   2  -4   90.99    4.90
  -2   2   4   96.99    5.00
   0  -2   4    6.30    1.60
   0  -2   4    7.60    2.20
   0   2  -4    7.50    2.40
   0   2   4    7.80    2.00
   0   2   4    9.60    2.00
   0   2  -4    5.10    1.60
   2  -2   4   72.89    6.30
   2  -2   4   66.59    4.50
  -2  -2  -4   80.99    6.70
   2  -2   4   74.49    4.80
   2   2   4   82.99    5.30
  -2   2  -4   68.79    5.00
   2   2   4   65.69    5.40
  -2   2  -4   76.39    5.90
   4  -2   4  189.78    7.50
  -4  -2  -4  194.78   11.10
   4  -2   4  193.28   10.60
   4  -2   4  190.28    7.90
   4   2   4  210.18    9.00
  -4   2  -4  183.78    8.70
   4   2   4  191.28    6.10
  -4   2  -4  180.38    9.70
   4   2   4  177.88    8.70
   4   2   4  174.58    9.10
   6  -2   4   49.99    5.30
   6  -2   4   37.10    5.70
   6  -2   4   60.09    4.70
  -6  -2  -4   51.89    7.00
   6   2   4   46.30    6.40
  -6   2  -4   49.80    6.50
  -6   2  -4   36.40    4.80
   6   2   4   62.39    5.90
   6   2   4   52.39    6.10
   6   2   4   49.40    4.00
  -8  -2  -4   34.20    6.70
   8  -2   4   52.59    5.40
   8  -2   4   44.30    4.40
   8  -2   4   42.80    7.00
   8   2   4   35.60    5.40
  -8   2  -4   44.00    6.80
   8   2   4   50.79    6.30
  -8   2  -4   34.40    5.10
   8   2   4   51.79    7.70
  -8   2  -4   45.60    5.80
   8   2   4   47.60    4.50
  10  -2   4    5.10    2.70
 -10  -2  -4    1.60    2.40
 -10  -2  -4   -5.20    4.20
  10  -2   4    5.50    3.30
  10  -2   4    1.70    3.80
  10   2   4    2.30    2.80
  10   2   4    1.40    2.50
 -10   2  -4   -4.40    4.00
 -10   2  -4   -1.80    3.20
  10   2   4    0.80    3.40
  10   2   4    5.20    5.30
 -10   2  -4    2.20    3.00
  12  -2   4   37.30    5.40
 -12  -2  -4   28.80    4.20
 -12  -2  -4   25.20    7.80
  12  -2   4   24.90    4.70
  12  -2   4   21.70    6.00
  12   2   4   34.60    5.10
 -12   2  -4   35.00    8.00
  12   2   4   31.10    5.00
 -12   2  -4   17.50    6.20
  12   2   4   18.20    5.40
 -12   2  -4   28.50    5.30
 -14  -2  -4   10.80    6.60
  14  -2   4   23.10    5.20
 -14   2  -4   17.10    4.90
 -14   2  -4    9.50    6.00
  14   2   4   16.30    5.20
  14   2   4   23.10    4.80
  14   2   4    9.30    8.50
 -16  -2  -4   93.79   13.80
  16  -2   4   95.79   10.30
  16   2   4   85.99    9.60
 -16   2  -4   97.79   11.40
 -16   2  -4   71.69   12.10
  16   2   4   76.69   14.90
 -18  -2  -4    0.10    7.20
  18  -2   4   -3.70    4.80
  18   2   4    6.20    4.90
 -18   2  -4   -4.70    7.10
  18   2   4   -8.70    9.00
  20  -2   4    6.60    6.60
  20   2   4    5.40    5.50
 -20   2  -4    2.20    9.10
  20   2   4    1.10   11.40
  22  -2   4   -3.00    6.60
  22   2   4   10.90   13.10
 -22   2  -4   11.70   10.90
  22   2   4    2.90    6.20
  27  -3  -4   42.70    9.90
  27   3  -4   59.69   16.80
  27   3  -4   36.90    9.80
  25  -3  -4    1.90    6.80
  25   3  -4    6.00   10.40
  25   3  -4   13.70    7.10
 -23  -3   4  153.48   18.40
  23  -3  -4  160.98   13.50
  23   3  -4  145.49   13.40
  23   3  -4  137.39   18.80
 -21  -3   4  211.38   19.60
  21  -3  -4  250.37   14.70
  21   3  -4  240.88   14.70
  21   3  -4  264.17   21.40
  19  -3  -4  754.72   24.10
 -19  -3   4  701.43   31.70
  19   3  -4  751.92   32.40
 -19   3   4  745.03   28.20
  19   3  -4  722.43   24.10
 -17  -3   4  329.37   20.70
  17  -3  -4  323.07   14.20
  17   3  -4  315.07   19.80
  17   3  -4  337.87   14.60
 -17   3   4  334.97   18.30
  15  -3  -4  195.68   10.20
 -15  -3   4  201.68   15.60
  15   3  -4  190.98   14.60
 -15   3   4  194.28   13.90
  15   3  -4  202.68   10.50
  13  -3  -4  390.36   13.50
 -13  -3   4  400.76   20.00
  13   3  -4  391.56   14.00
 -13   3   4  373.76   17.30
  11  -3  -4  866.61   21.50
 -11  -3   4  852.61   29.30
  11   3  -4  876.41   22.70
 -11   3   4  861.71   26.60
  -9  -3   4 1177.18   34.20
   9  -3  -4 1187.98   26.00
   9   3  -4 1168.78   27.40
  -9   3   4 1162.08   31.70
   7  -3  -4 2398.66   46.90
  -7  -3   4 2409.36   55.59
  -7   3   4 2334.27   53.39
   7   3  -4 2442.16   49.80
  -7   3   4 2484.35   46.90
  -5  -3   4  241.98    9.20
   5  -3  -4  245.78    6.80
  -5  -3   4  256.87   11.80
  -5   3   4  232.88   10.90
   5   3  -4  233.08    7.70
   5   3  -4  244.48    9.60
  -5   3   4  238.88    7.80
  -3  -3   4  576.54   16.90
  -3  -3   4  593.84   17.60
   3   3  -4  548.65   14.80
  -3   3   4  575.44   14.80
  -3   3   4  588.54   17.70
   3   3  -4  584.54   16.70
  -1  -3   4  739.43   19.10
   1  -3  -4  740.43   21.00
  -1  -3   4  722.03   20.90
  -1   3   4  731.33   20.30
   1   3  -4  718.03   18.50
   1   3  -4  726.13   20.20
  -1   3   4  733.13   18.40
   1  -3   4 1677.53   34.60
   1  -3   4 1645.64   39.20
  -1  -3  -4 1636.64   39.50
  -1   3  -4 1666.33   38.20
   1   3   4 1593.54   36.40
  -1   3  -4 1607.04   36.10
   1   3   4 1621.04   35.80
   3  -3   4  950.40   27.40
  -3  -3  -4  962.00   28.20
   3  -3   4  967.60   21.90
   3  -3   4  918.41   23.20
   3   3   4  970.50   24.50
  -3   3  -4  946.21   26.30
   3   3   4  940.11   24.10
  -3   3  -4  939.61   24.50
  -5  -3  -4  959.20   30.30
   5  -3   4 1014.90   24.80
   5  -3   4 1008.60   22.90
   5  -3   4  964.60   29.10
  -5   3  -4  992.70   28.30
  -5   3  -4 1001.30   26.50
   5   3   4  995.80   26.30
   5   3   4  980.70   25.20
   5   3   4  985.60   21.00
   7  -3   4  417.26   12.30
   7  -3   4  392.26   17.90
   7  -3   4  382.66   13.70
  -7  -3  -4  405.26   19.40
   7   3   4  384.66   11.30
   7   3   4  391.76   14.40
  -7   3  -4  410.36   15.70
   7   3   4  423.76   17.00
  -7   3  -4  398.06   17.50
   7   3   4  386.16   15.40
   9  -3   4   87.19    5.50
  -9  -3  -4   69.79    9.90
   9  -3   4   74.49    7.10
   9  -3   4   81.89   10.30
   9   3   4   79.59    5.70
  -9   3  -4   75.79    8.40
   9   3   4   79.09    7.50
   9   3   4   73.19    8.30
   9   3   4   80.09    9.50
  -9   3  -4   69.49    6.90
  -9   3  -4   73.99    9.20
  11  -3   4  246.88   12.00
  11  -3   4  229.68    9.60
  11  -3   4  242.68   16.10
 -11  -3  -4  242.28   18.30
 -11  -3  -4  265.47   11.00
  11   3   4  240.58   14.10
  11   3   4  246.88   16.40
 -11   3  -4  242.78   14.20
 -11   3  -4  242.28   12.30
 -11   3  -4  237.18   15.80
  11   3   4  249.68   10.60
  11   3   4  265.47   12.50
 -13  -3  -4  254.77   20.00
  13  -3   4  268.27   13.30
  13   3   4  273.07   12.10
  13   3   4  260.17   19.00
 -13   3  -4  259.47   17.90
 -13   3  -4  274.27   15.70
  13   3   4  257.27   15.80
 -15  -3  -4  762.72   35.50
  15  -3   4  797.52   25.50
 -15   3  -4  750.72   31.90
 -15   3  -4  798.32   28.60
  15   3   4  777.52   23.70
  15   3   4  823.82   34.90
  17  -3   4   26.50    6.90
 -17  -3  -4   14.00    8.80
  17   3   4   10.50    9.90
  17   3   4   24.30    6.00
 -17   3  -4   17.80    6.10
 -17   3  -4   15.20    9.10
  19  -3   4   20.60    7.20
 -19  -3  -4   24.50   10.80
 -19   3  -4   21.10   10.30
  19   3   4   24.00    6.70
  19   3   4   30.80   12.80
 -21  -3  -4   18.00   16.70
  21  -3   4   11.30    7.30
 -21   3  -4   -1.20   10.40
  21   3   4    8.60    6.40
  21   3   4   -4.80   11.00
  23  -3   4   17.30    8.70
  23   3   4   18.40    7.80
  23   3   4   54.09   18.10
 -23   3  -4   21.90   13.70
  26  -4  -4   -3.60    6.80
  26   4  -4   -6.20    6.90
 -24  -4   4   57.29   13.10
  24  -4  -4   68.19   10.10
  24   4  -4   65.99    9.80
 -22  -4   4  162.38   19.70
  22  -4  -4  120.29   12.70
  22   4  -4  125.79   12.90
 -20  -4   4  411.16   26.20
  20  -4  -4  397.46   17.60
 -20   4   4  387.16   22.30
  20   4  -4  375.86   17.80
  18  -4  -4  535.15   19.40
 -18  -4   4  540.95   28.40
 -18   4   4  538.25   25.30
  18   4  -4  533.85   19.80
 -16  -4   4  357.46   21.90
  16  -4  -4  324.27   13.80
  16   4  -4  335.67   14.40
 -16   4   4  331.47   19.20
 -14  -4   4    5.90    5.10
  14  -4  -4   18.90    3.90
  14   4  -4   15.10    3.80
 -14   4   4   14.70    5.30
  12  -4  -4  650.23   18.20
 -12  -4   4  640.14   26.80
 -12   4   4  650.03   24.20
  12   4  -4  671.13   19.60
  10  -4  -4  285.47   10.10
 -10  -4   4  278.57   16.30
 -10   4   4  280.07   14.80
  10   4  -4  292.57   11.40
  -8  -4   4 1425.16   39.70
   8  -4  -4 1388.46   29.60
  -8   4   4 1326.07   36.70
   8   4  -4 1404.76   32.40
   6  -4  -4  901.31   19.60
  -6  -4   4  865.31   22.40
  -6  -4   4  871.21   27.80
   6   4  -4  876.81   20.60
  -6   4   4  887.71   26.70
   6   4  -4  886.51   23.20
  -6   4   4  929.31   20.30
   4  -4  -4  506.85   15.70
  -4  -4   4  487.05   15.90
   4  -4  -4  495.35   11.40
  -4  -4   4  495.05   18.20
   4   4  -4  515.35   16.20
  -4   4   4  473.75   17.50
  -4   4   4  492.15   13.40
  -4   4   4  500.35   13.10
   4   4  -4  482.15   14.00
  -2  -4   4   75.99    6.60
  -2  -4   4   84.19    7.00
   2  -4  -4   84.29    6.80
   2   4  -4   81.39    5.70
  -2   4   4   81.89    5.40
  -2   4   4   77.79    6.80
   2   4  -4   87.09    6.80
   0  -4   4 1715.03   37.40
   0  -4  -4 1674.13   41.00
   0  -4   4 1658.23   40.70
   0   4   4 1686.03   39.10
   0   4  -4 1685.33   39.60
   0   4  -4 1614.24   37.50
   0   4   4 1685.13   37.20
  -2  -4  -4 2144.09   51.59
   2  -4   4 2206.68   51.29
   2  -4   4 2175.98   44.40
  -2   4  -4 2092.39   47.20
   2   4   4 2129.49   46.80
  -2   4  -4 2131.59   49.20
   2   4   4 2157.58   47.00
  -4  -4  -4 1803.22   46.50
   4  -4   4 1779.82   36.70
   4  -4   4 1742.33   39.30
   4  -4   4 1799.62   45.40
   4   4   4 1752.72   41.10
  -4   4  -4 1729.93   41.30
  -4   4  -4 1759.12   43.40
   4   4   4 1679.73   39.20
   6  -4   4  452.65   12.90
   6  -4   4  453.65   20.20
   6  -4   4  422.96   14.90
  -6  -4  -4  429.76   20.90
  -6   4  -4  434.76   18.20
  -6   4  -4  433.96   16.90
   6   4   4  444.06   17.10
   6   4   4  436.76   15.10
   6   4   4  442.56   11.60
   8  -4   4   38.20    5.30
   8  -4   4   45.90    7.70
  -8  -4  -4   37.90    8.40
  -8   4  -4   41.40    5.90
   8   4   4   38.00    6.40
  -8   4  -4   33.00    6.60
   8   4   4   34.20    4.80
   8   4   4   45.80    4.40
  10  -4   4   -4.10    2.90
 -10  -4  -4   -0.20    5.20
 -10   4  -4   -0.40    3.00
  10   4   4   -1.90    3.60
  10   4   4    3.20    2.30
  10   4   4   -3.50    3.00
 -10   4  -4   -3.90    4.90
 -12  -4  -4  467.05   26.20
  12  -4   4  456.05   17.70
  12   4   4  450.25   15.20
 -12   4  -4  467.25   20.50
 -12   4  -4  461.15   23.00
  12   4   4  444.16   20.40
  14  -4   4  298.27   15.50
 -14  -4  -4  307.87   23.80
  14   4   4  291.27   13.20
 -14   4  -4  295.77   20.50
  14   4   4  255.87   20.70
 -14   4  -4  296.87   18.10
  16  -4   4  181.58   13.40
 -16  -4  -4  181.68   21.10
 -16   4  -4  166.18   15.80
  16   4   4  167.28   11.50
  16   4   4  169.18   18.80
 -16   4  -4  188.68   19.00
  18  -4   4   33.50    7.80
 -18  -4  -4   45.10   12.40
 -18   4  -4   31.70    8.00
  18   4   4   54.29   13.50
 -18   4  -4   39.90   11.90
  18   4   4   30.70    6.80
 -20  -4  -4    9.50   11.20
  20  -4   4    9.80    7.50
  20   4   4   12.80    6.80
 -20   4  -4    8.30   11.70
  20   4   4   34.50   13.80
  22  -4   4    0.00    7.60
 -22  -4  -4    3.60   11.10
  22   4   4   20.50   12.60
 -22   4  -4    6.80   11.40
  25  -5  -4   -5.80    6.70
 -25  -5   4    3.10   10.60
  25   5  -4    4.20    6.40
  23  -5  -4   20.60    8.10
 -23  -5   4    4.20    9.50
  23   5  -4   18.40    7.30
 -21  -5   4    7.80    9.40
  21  -5  -4    3.80    5.60
 -21   5   4    5.70    7.00
  21   5  -4   10.10    5.70
 -19  -5   4   45.70   11.50
  19  -5  -4   48.20    7.50
  19   5  -4   43.60    7.10
 -19   5   4   44.90    9.70
 -17  -5   4   54.49   11.10
  17  -5  -4   50.29    7.00
  17   5  -4   47.80    6.60
 -17   5   4   43.30    9.00
 -15  -5   4   16.70    7.40
  15  -5  -4   17.90    4.70
  15   5  -4   24.70    5.10
 -15   5   4   15.80    6.10
 -13  -5   4   17.80    6.30
  13  -5  -4   11.10    3.40
  13   5  -4   13.10    4.10
 -13   5   4    9.50    5.00
 -11  -5   4  172.28   14.10
  11  -5  -4  165.48    7.90
  11   5  -4  148.19    8.90
 -11   5   4  150.98   12.80
   9  -5  -4  458.85   13.50
  -9  -5   4  472.85   22.10
  -9   5   4  459.45   20.10
   9   5  -4  465.45   15.90
   7  -5  -4   11.60    2.70
  -7  -5   4   12.70    5.10
   7  -5  -4   13.00    2.50
  -7   5   4   18.00    4.70
  -7   5   4   12.10    3.30
  -7   5   4   11.10    2.20
   7   5  -4   18.40    4.10
   7   5  -4   11.10    2.50
   5  -5  -4    9.90    2.00
   5  -5  -4    9.40    3.00
  -5   5   4   16.10    3.30
   5   5  -4   14.90    3.70
  -5   5   4    9.50    2.40
  -5   5   4   25.60    5.70
   5   5  -4    7.50    2.40
  -3  -5   4   90.89    8.70
   3  -5  -4   83.49    7.80
   3   5  -4  101.79    7.80
  -3   5   4   83.09    9.00
   3   5  -4   93.19    6.70
  -3   5   4   87.49    6.20
   1  -5  -4   62.79    7.80
  -1  -5   4   71.29    7.10
  -1  -5   4   67.49    8.00
   1   5  -4   77.89    6.60
  -1   5   4   71.69    7.60
  -1   5   4   69.59    6.20
   1   5  -4   78.99    7.50
   1  -5   4 1061.99   26.60
  -1  -5  -4 1062.29   31.60
   1  -5   4 1064.39   31.50
  -1   5  -4 1052.99   28.20
  -1   5  -4 1055.89   29.60
   1   5   4 1020.10   28.50
   1   5   4 1029.50   27.30
  -3  -5  -4    9.60    4.10
   3  -5   4    9.20    2.40
   3  -5   4   11.60    3.20
   3  -5   4    6.10    3.60
  -3   5  -4    9.80    3.80
   3   5   4   10.70    3.30
   3   5   4   13.00    3.30
  -3   5  -4   11.20    3.10
   5  -5   4   83.49    7.30
   5  -5   4   98.29    5.70
  -5  -5  -4   95.89   10.90
   5   5   4   88.69    4.40
   5   5   4   76.99    8.10
   5   5   4   92.79    7.30
  -5   5  -4   96.79    9.60
  -5   5  -4   87.39    8.50
   7  -5   4   20.70    4.40
  -7  -5  -4   21.80    6.40
  -7   5  -4   17.10    4.30
   7   5   4   24.00    4.00
   7   5   4   27.20    3.00
   7   5   4   17.20    4.70
  -7   5  -4   14.00    5.10
   9  -5   4   11.10    4.00
  -9  -5  -4   13.70    6.60
   9   5   4   20.50    3.40
   9   5   4   19.20    4.00
  -9   5  -4   14.50    4.50
   9   5   4   13.70    5.00
  -9   5  -4   18.90    6.40
 -11  -5  -4   26.10    8.70
  11  -5   4   29.70    5.60
 -11   5  -4   27.60    7.40
  11   5   4   21.40    6.10
  11   5   4   26.60    4.40
 -11   5  -4   30.50    6.40
  13  -5   4    7.00    4.60
 -13  -5  -4    9.10    8.50
  13   5   4   15.10    4.20
 -13   5  -4    7.30    5.30
 -13   5  -4    2.60    6.40
 -15  -5  -4   92.99   15.40
  15  -5   4  112.19   11.80
 -15   5  -4   65.49   10.00
 -15   5  -4   76.59   13.40
  15   5   4   99.99    9.40
  17  -5   4    5.40    6.00
 -17  -5  -4   12.20    9.60
 -17   5  -4   -5.80    8.80
  17   5   4   -0.80    4.50
 -17   5  -4    5.00    6.20
 -19  -5  -4   -8.80    9.90
  19  -5   4    2.20    7.40
 -19   5  -4    0.20    6.20
 -19   5  -4   -6.60   10.10
  21  -5   4   10.60    8.40
 -21  -5  -4   27.90   13.80
 -21   5  -4    5.00   12.70
 -26  -6   4    0.00   11.70
  26  -6  -4    6.00    7.80
 -26   6   4   10.80   11.10
  26   6  -4   13.40    7.60
  24  -6  -4   -2.30    7.20
 -24  -6   4    3.60   10.80
  24   6  -4    6.70    6.60
 -24   6   4   -4.60    8.70
 -22  -6   4   40.00   13.00
  22  -6  -4   32.80    8.30
 -22   6   4   42.00   11.10
  22   6  -4   36.90    8.00
 -22   6   4   19.70    9.70
 -20  -6   4   86.49   15.80
  20  -6  -4   79.99    9.80
 -20   6   4   64.49   11.80
 -20   6   4   58.09   11.00
  20   6  -4   84.09    9.80
  18  -6  -4  120.19   10.70
 -18  -6   4   91.79   14.80
 -18   6   4   95.49   12.60
  18   6  -4  110.29   10.90
 -18   6   4  107.59   13.60
 -16  -6   4   17.30    8.10
  16  -6  -4   22.90    5.30
 -16   6   4   19.70    7.30
  16   6  -4   20.40    5.20
 -16   6   4   24.10    7.50
 -14  -6   4   14.60    7.80
  14  -6  -4   13.00    4.10
  14   6  -4   15.20    4.50
 -14   6   4    7.00    5.00
 -14   6   4    1.40    5.00
  12  -6  -4  194.18    9.40
 -12  -6   4  188.18   16.60
 -12   6   4  175.58   12.20
  12   6  -4  192.78   10.80
 -12   6   4  196.38   15.60
 -10  -6   4  182.38   15.50
  10  -6  -4  191.88    8.80
 -10   6   4  202.18   15.00
 -10   6   4  200.38   11.80
  10   6  -4  194.78   10.90
   8  -6  -4  812.22   20.20
  -8  -6   4  788.42   30.50
  -8   6   4  867.51   29.60
   8   6  -4  781.92   21.60
   8   6  -4  827.82   24.10
  -8   6   4  775.42   23.40
  -6  -6   4  990.90   33.20
   6  -6  -4  980.20   22.60
   6  -6  -4  994.50   26.60
   6   6  -4  956.90   25.70
  -6   6   4  992.00   32.00
  -6   6   4 1000.20   23.60
   6   6  -4 1014.80   28.10
  -6   6   4  953.60   25.30
   4  -6  -4  177.88    7.10
  -4  -6   4  202.18   13.30
   4  -6  -4  177.38   10.80
   4   6  -4  195.38   10.10
  -4   6   4  172.88   12.80
  -4   6   4  187.28    8.90
   4   6  -4  170.68   10.80
  -4   6   4  169.38    8.30
   2  -6  -4  138.49   10.90
  -2  -6   4  161.88   11.40
  -2   6   4  151.68    8.90
  -2   6   4  152.88   12.00
   2   6  -4  158.48    9.60
   2   6  -4  160.58   10.70
   0  -6  -4   51.79    7.70
   0  -6   4   74.69    7.70
   0   6   4   59.69    7.50
   0   6   4   64.49    7.20
   0   6  -4   76.79    8.30
   0   6  -4   68.49    7.30
   2  -6   4  971.50   25.80
  -2  -6  -4  930.41   31.90
   2   6   4  940.91   28.30
   2   6   4  969.90   27.60
  -2   6  -4 1004.00   28.70
  -2   6  -4  961.20   29.50
   4  -6   4  362.06   12.30
   4  -6   4  356.26   14.60
  -4  -6  -4  344.47   19.50
   4   6   4  346.37   14.80
  -4   6  -4  327.97   16.60
  -4   6  -4  344.27   16.00
   4   6   4  354.86   15.80
   6  -6   4  224.58   12.10
  -6  -6  -4  214.48   16.60
   6   6   4  235.98   13.40
  -6   6  -4  214.08   14.40
   6   6   4  221.38   11.10
   6   6   4  223.58    7.90
  -6   6  -4  225.08   13.70
  -8  -6  -4  149.19   15.30
   8  -6   4  140.79   10.10
   8   6   4  133.79   11.40
   8   6   4  132.39    6.80
  -8   6  -4  137.49   12.70
  -8   6  -4  156.68   12.60
   8   6   4  154.78    9.60
 -10  -6  -4   16.70    7.30
  10  -6   4   20.20    5.40
 -10   6  -4   23.50    6.70
  10   6   4   23.90    3.90
 -10   6  -4   21.10    5.70
  12  -6   4  168.68   12.20
 -12  -6  -4  129.59   17.30
 -12   6  -4  162.28   16.10
  12   6   4  137.79    9.20
 -12   6  -4  150.68   15.10
 -14  -6  -4   42.10   12.30
  14  -6   4   58.29    8.80
 -14   6  -4   53.69   11.40
 -14   6  -4   45.60    9.00
 -16  -6  -4    6.00    9.90
  16  -6   4   15.10    6.70
 -16   6  -4   -2.70    8.70
 -16   6  -4   12.40    6.70
 -18  -6  -4   29.00   14.40
  18  -6   4   46.70   10.30
 -18   6  -4   41.00   13.70
 -18   6  -4   66.79   11.50
  20  -6   4   -8.90    7.40
 -20  -6  -4   -6.00   12.60
 -20   6  -4   -2.60   11.60
 -20   6  -4   10.00    7.50
 -25  -7   4    4.80   11.90
  25  -7  -4    1.10    7.20
  25   7  -4    0.80    6.40
 -25   7   4   -6.10   10.20
  23  -7  -4   36.30    8.70
 -23  -7   4   49.40   14.40
 -23   7   4   56.69   13.10
 -23   7   4   44.50   11.30
  23   7  -4   44.00    8.60
  21  -7  -4  191.68   14.90
 -21  -7   4  207.08   25.10
 -21   7   4  149.09   17.80
  21   7  -4  207.38   15.00
 -21   7   4  233.78   22.00
  19  -7  -4  249.18   15.20
 -19  -7   4  276.37   26.10
 -19   7   4  231.38   19.70
  19   7  -4  252.07   15.40
 -19   7   4  266.37   22.90
  17  -7  -4  412.26   17.40
 -17  -7   4  402.56   28.40
 -17   7   4  447.06   26.70
  17   7  -4  392.36   18.40
 -17   7   4  413.86   22.70
  15  -7  -4   30.10    5.50
 -15  -7   4   23.90    9.60
  15   7  -4   31.50    6.80
 -15   7   4   24.10    7.20
 -15   7   4   17.60    7.50
 -13  -7   4   11.40    7.30
  13  -7  -4   21.40    4.40
 -13   7   4   12.50    6.80
  13   7  -4   11.50    4.50
 -13   7   4    7.50    5.10
  11  -7  -4  484.25   15.50
 -11  -7   4  436.06   25.40
 -11   7   4  451.75   23.60
  11   7  -4  455.55   17.80
 -11   7   4  448.76   19.00
  -9  -7   4 1271.77   43.60
   9  -7  -4 1290.97   30.40
  -9   7   4 1334.27   35.10
   9   7  -4 1336.07   35.00
   9   7  -4 1276.97   32.20
  -9   7   4 1324.67   41.60
   7  -7  -4 1560.24   38.10
  -7  -7   4 1519.95   46.90
   7  -7  -4 1551.34   34.10
  -7   7   4 1531.85   37.40
  -7   7   4 1502.55   44.80
  -7   7   4 1570.04   34.50
   7   7  -4 1533.05   39.20
   7   7  -4 1562.64   37.80
   5  -7  -4  609.54   21.20
  -5  -7   4  609.04   25.30
   5  -7  -4  583.64   16.00
  -5   7   4  565.64   24.30
  -5   7   4  597.84   18.20
   5   7  -4  592.54   20.90
  -5   7   4  591.24   17.80
   5   7  -4  577.04   19.80
   3  -7  -4   34.50    6.20
  -3  -7   4   34.50    6.40
   3   7  -4   30.60    5.40
  -3   7   4   30.70    4.10
   3   7  -4   26.60    4.60
  -3   7   4   18.20    5.30
  -3   7   4   29.30    4.50
  -1  -7   4  138.99   10.70
   1  -7  -4  134.99   11.50
   1   7  -4  124.19   10.50
   1   7  -4  156.78   10.60
  -1   7   4  143.59   12.00
  -1   7   4  141.99    9.30
   1  -7   4 2140.69   50.09
  -1  -7  -4 2111.69   55.79
  -1   7  -4 2161.28   52.09
   1   7   4 2063.09   49.30
  -1   7  -4 2080.99   51.19
   1   7   4 2062.89   51.99
   3  -7   4  889.31   24.60
  -3  -7  -4  851.71   32.70
   3   7   4  836.62   27.10
  -3   7  -4  873.71   28.50
  -3   7  -4  865.41   29.10
   3   7   4  850.21   27.60
   5  -7   4  827.22   25.60
  -5  -7  -4  827.72   33.70
   5  -7   4  861.11   22.20
   5   7   4  828.22   28.00
   5   7   4  819.42   26.00
  -5   7  -4  811.52   28.50
  -5   7  -4  856.01   29.50
  -7  -7  -4  128.49   16.00
   7  -7   4  144.69   11.30
   7   7   4  120.99   12.10
  -7   7  -4  138.59   13.50
   7   7   4  144.09    9.90
  -7   7  -4  142.89   12.90
  -9  -7  -4    2.70    6.60
   9  -7   4    3.80    4.20
  -9   7  -4    0.90    4.80
  -9   7  -4    7.60    6.30
  11  -7   4  162.48   12.70
 -11  -7  -4  130.49   17.90
 -11   7  -4  139.19   15.70
 -11   7  -4  160.28   16.40
  13  -7   4  128.69   12.70
 -13  -7  -4   98.49   16.20
 -13   7  -4  113.79   15.10
 -13   7  -4  128.29   16.00
  15  -7   4  163.68   14.40
 -15  -7  -4  118.79   18.80
 -15   7  -4  169.68   17.50
 -15   7  -4  144.29   18.00
 -17  -7  -4   43.20   15.30
  17  -7   4   42.60    9.50
 -17   7  -4   36.10   12.30
 -17   7  -4   52.79   10.60
  19  -7   4    4.50    6.70
 -19  -7  -4  -11.60   11.40
 -19   7  -4    5.00    9.60
 -19   7  -4    9.00    7.30
  21  -7   4   11.50    8.60
 -21  -7  -4    1.50   13.40
 -21   7  -4   13.40   11.60
 -21   7  -4    5.20    8.10
  24  -8  -4   -1.20    6.10
 -24  -8   4   -0.70   11.00
 -24   8   4   -7.10    7.80
  24   8  -4    4.80    6.10
 -24   8   4    7.00   10.30
 -22  -8   4    2.40   10.40
  22  -8  -4    9.60    6.50
  22   8  -4    6.20    5.70
 -22   8   4   -9.90    7.30
 -22   8   4    8.40    9.50
 -20  -8   4   70.59   15.50
  20  -8  -4   56.59    8.40
  20   8  -4   83.79   10.30
 -20   8   4   59.49   12.60
 -20   8   4   91.79   14.20
 -18  -8   4   84.19   15.80
  18  -8  -4   83.89    9.80
 -18   8   4   83.79   14.10
 -18   8   4   87.29   13.50
  18   8  -4   96.09   10.80
 -16  -8   4   60.19   13.80
  16  -8  -4   40.00    6.90
 -16   8   4   46.80   10.60
 -16   8   4   52.09   10.40
  16   8  -4   52.89    8.30
  14  -8  -4   21.10    5.20
 -14  -8   4   16.70    9.00
  14   8  -4   24.10    6.60
 -14   8   4   15.10    8.60
 -14   8   4   17.70    7.30
  12  -8  -4  131.69    9.20
 -12  -8   4  102.19   14.50
 -12   8   4  133.09   16.60
 -12   8   4  113.99   12.10
  12   8  -4  120.59   11.20
  10  -8  -4  270.67   11.60
 -10  -8   4  255.67   20.60
 -10   8   4  277.17   19.60
 -10   8   4  276.57   14.90
  10   8  -4  275.67   14.80
   8  -8  -4  588.84   17.60
  -8  -8   4  551.04   27.70
  -8   8   4  579.14   20.50
  -8   8   4  590.24   26.90
   8   8  -4  588.24   20.50
   8   8  -4  582.64   21.70
   6  -8  -4  281.97   11.20
  -6  -8   4  284.87   18.80
   6  -8  -4  296.97   14.80
   6   8  -4  295.07   15.30
  -6   8   4  307.17   19.00
   6   8  -4  278.37   14.30
  -6   8   4  298.77   13.30
  -4  -8   4  184.28   14.70
   4  -8  -4  220.48   13.60
   4   8  -4  209.78   12.50
  -4   8   4  214.68   10.90
   4   8  -4  212.98   13.30
  -4   8   4  207.18   15.50
  -4   8   4  203.68   10.20
   2  -8  -4   43.70    7.70
  -2  -8   4   32.30    6.80
  -2   8   4   30.30    5.10
  -2   8   4   26.90    6.50
   2   8  -4   27.00    6.00
  -2   8   4   30.00    4.20
   2   8  -4   27.30    5.50
   0  -8  -4  391.46   20.80
   0  -8   4  436.96   19.20
   0   8  -4  431.86   19.10
   0   8   4  415.46   17.20
   0   8  -4  391.36   18.50
   0   8   4  430.86   20.50
  -2  -8  -4  352.66   20.70
   2  -8   4  357.76   16.00
  -2   8  -4  350.06   18.00
   2   8   4  345.07   16.60
   2   8   4  347.07   18.20
  -2   8  -4  357.86   18.00
   4  -8   4  138.89    9.40
  -4  -8  -4  143.09   15.50
   4   8   4  100.09   11.50
  -4   8  -4  133.99   12.50
  -4   8  -4  112.09   12.40
  -6  -8  -4  173.78   19.30
   6   8   4  185.38   13.20
  -6   8  -4  219.98   16.10
  -6   8  -4  194.48   16.20
   8  -8   4   68.89    9.20
  -8  -8  -4   57.49   13.50
  -8   8  -4   65.79   10.70
  -8   8  -4   73.89   10.00
  10  -8   4    8.30    5.90
 -10  -8  -4   -3.10    7.80
 -10   8  -4   12.10    8.00
 -10   8  -4    3.70    5.30
 -12  -8  -4   86.79   15.80
  12  -8   4  105.19   11.80
 -12   8  -4   91.49   12.90
 -12   8  -4   86.29   13.60
  14  -8   4  139.99   14.10
 -14  -8  -4  113.89   18.60
 -14   8  -4  149.69   17.50
 -14   8  -4  122.09   16.50
  16  -8   4   18.00    7.50
 -16  -8  -4   14.70   12.70
 -16   8  -4   17.20    7.70
 -16   8  -4   29.20   11.10
 -18  -8  -4    8.80   13.30
  18  -8   4    1.70    7.10
 -18   8  -4    9.50    9.90
 -18   8  -4   -0.30    7.00
 -20  -8  -4   30.90   16.00
  20  -8   4   15.70    9.40
 -20   8  -4    4.70    8.50
 -20   8  -4    6.70   11.70
 -23  -9   4   30.60   15.00
  23  -9  -4   28.60    8.50
  23   9  -4   24.00    7.90
 -23   9   4   13.70   10.20
 -23   9   4    8.10   10.40
  21  -9  -4   37.40    8.30
 -21  -9   4   36.30   14.20
  21   9  -4   37.60    7.90
 -21   9   4    9.10    9.90
 -21   9   4   34.60   12.10
 -19  -9   4   -0.30   10.00
  19  -9  -4   -4.60    4.60
 -19   9   4  -13.20    7.40
  19   9  -4   10.80    5.90
 -19   9   4   -0.80    7.80
 -17  -9   4   13.60   10.90
  17  -9  -4   18.80    6.00
 -17   9   4   15.40    9.10
  17   9  -4   16.50    6.10
 -17   9   4   13.60    8.80
 -15  -9   4    7.40    9.40
  15  -9  -4    3.80    5.00
 -15   9   4    1.50    7.30
  15   9  -4    8.50    5.70
 -15   9   4    9.50    8.70
 -13  -9   4    8.60    8.30
  13  -9  -4    2.30    4.50
 -13   9   4    3.30    7.90
 -13   9   4    4.70    6.70
  13   9  -4    0.10    5.10
  11  -9  -4    2.00    4.00
 -11  -9   4    4.40    7.30
 -11   9   4  -10.00    6.60
 -11   9   4    2.10    5.20
  11   9  -4   -0.60    4.90
   9  -9  -4   10.20    3.90
  -9  -9   4    6.40    6.00
  -9   9   4   10.30    5.20
  -9   9   4   13.30    6.50
   9   9  -4   12.60    5.80
  -7  -9   4  137.99   15.60
   7  -9  -4  152.58    9.20
   7   9  -4  178.98   13.10
  -7   9   4  146.59   10.80
   7   9  -4  143.99   11.60
  -7   9   4  180.28   16.50
  -5  -9   4   30.60    7.90
   5  -9  -4   26.60    5.90
  -5   9   4   27.00    5.00
  -5   9   4   27.40    7.90
   5   9  -4   42.40    7.40
   5   9  -4   18.20    5.20
  -3  -9   4   14.70    5.90
   3  -9  -4   25.00    6.60
   3   9  -4   20.20    5.80
   3   9  -4   25.60    6.20
  -3   9   4   17.90    6.30
   1  -9  -4   21.90    6.90
  -1  -9   4   15.80    5.90
  -1   9   4   24.70    7.10
   1   9  -4   24.80    6.70
   1   9  -4   24.60    6.00
   1  -9   4   -0.60    4.10
  -1  -9  -4    1.70    4.90
   1   9   4    3.10    4.50
  -1   9  -4   -2.70    3.60
  -1   9  -4   -1.90    4.20
  -3  -9  -4   28.60    8.40
  -3   9  -4   24.90    7.20
  -3   9  -4   32.00    7.00
   3   9   4   32.00    7.00
  -5  -9  -4   13.30    7.70
  -5   9  -4   23.10    6.80
   5   9   4    9.10    6.00
  -5   9  -4    9.90    7.30
  -7  -9  -4   73.09   14.40
  -7   9  -4   66.49   10.00
  -7   9  -4   59.29   10.90
  -9  -9  -4   10.30    9.70
   9  -9   4   -1.80    5.60
  -9   9  -4    8.70    7.70
  -9   9  -4   11.30    6.00
  11  -9   4   11.00    6.80
 -11  -9  -4    2.20   10.80
 -11   9  -4   18.40    9.00
 -11   9  -4   11.50    6.70
 -13  -9  -4   66.39   16.90
  13  -9   4   75.29   10.40
 -13   9  -4   69.69   11.70
 -13   9  -4   87.89   13.90
 -15  -9  -4   14.20   13.30
  15  -9   4   10.10    7.00
 -15   9  -4    1.00    6.60
 -15   9  -4   14.00    9.50
  17  -9   4  118.19   14.20
 -17  -9  -4  115.09   23.00
 -17   9  -4  119.79   18.30
 -17   9  -4  113.69   16.70
  20 -10  -4  155.98   13.90
 -20 -10   4  121.39   20.90
 -20  10   4  131.99   18.50
 -20  10   4  123.39   16.20
  20  10  -4  127.89   14.40
 -18 -10   4   96.39   18.30
  18 -10  -4  129.39   12.00
  18  10  -4   78.39   10.70
 -18  10   4  111.09   17.90
 -18  10   4  104.59   14.30
 -16 -10   4   31.90   12.40
  16 -10  -4   48.70    7.70
 -16  10   4   61.89   11.00
  16  10  -4   50.09    8.70
 -16  10   4   41.60   11.10
  14 -10  -4   -3.90    4.30
 -14 -10   4    3.60    8.30
  14  10  -4   -1.10    4.70
 -14  10   4    5.80    7.50
 -14  10   4   -1.00    6.10
 -12 -10   4   19.00    9.50
  12 -10  -4   27.10    6.00
 -12  10   4   25.90    7.60
  12  10  -4   23.00    6.80
 -12  10   4   22.80    9.90
 -10 -10   4  456.55   28.50
  10 -10  -4  429.86   17.40
  10  10  -4  398.56   20.30
 -10  10   4  423.06   20.70
 -10  10   4  408.46   26.80
  -8 -10   4   78.79   12.90
  -8  10   4   77.49   12.40
   8  10  -4   71.49    9.80
  -6 -10   4 1267.37   45.10
  -6  10   4 1296.57   45.50
   6  10  -4 1241.18   38.10
   6  10  -4 1264.37   38.20
   4 -10  -4   97.39   12.20
  -4 -10   4   93.59   12.80
   4  10  -4   95.39   11.10
   4  10  -4   98.09   11.40
  -4  10   4   97.89   13.20
   2 -10  -4    7.30    5.70
  -2 -10   4   12.90    6.90
   2  10  -4   20.20    6.60
  -2  10   4   27.30    7.90
   2  10  -4   16.10    6.70
   0 -10  -4  198.88   17.50
   0 -10   4  156.28   14.90
   0  10   4  199.58   17.20
   0  10  -4  174.38   15.70
   0  10  -4  196.98   15.50
  -2 -10  -4  471.45   26.90
   2  10   4  455.15   23.80
  -2  10  -4  436.56   22.30
  -2  10  -4  450.75   23.40
  -4 -10  -4  429.26   27.40
  -4  10  -4  446.46   23.70
  -4  10  -4  443.16   22.90
   4  10   4  451.25   23.00
  -6 -10  -4  302.57   25.30
  -6  10  -4  342.17   21.50
  -6  10  -4  309.97   20.90
  -8 -10  -4    4.00    8.20
  -8  10  -4   -1.60    7.10
  -8  10  -4   11.80    7.00
  10 -10   4   -1.80    6.10
 -10 -10  -4    4.70    8.70
 -10  10  -4    1.10    5.80
 -10  10  -4   -6.00    7.20
 -12 -10  -4  249.78   28.40
  12 -10   4  289.87   19.40
 -12  10  -4  260.07   22.50
 -12  10  -4  294.57   23.40
  14 -10   4  175.28   17.70
 -14 -10  -4  116.09   21.60
 -14  10  -4  202.68   21.80
 -14  10  -4  123.69   17.80
 -16 -10  -4   60.39   18.00
  16 -10   4   59.19   11.50
 -16  10  -4   63.29   13.30
 -16  10  -4   69.09   15.70
 -19 -11   4  105.39   20.50
  19 -11  -4  134.69   14.20
 -19  11   4  189.88   24.30
  19  11  -4  109.79   13.30
 -19  11   4  135.59   16.60
  17 -11  -4   73.29   10.00
 -17 -11   4   63.69   16.50
 -17  11   4   80.29   13.40
  17  11  -4   48.70   10.20
 -17  11   4   77.99   14.30
  15 -11  -4    9.20    5.70
 -15 -11   4   -6.90    8.30
 -15  11   4    6.20    8.00
  15  11  -4    6.30    6.40
 -13 -11   4   -0.60    8.30
  13  11  -4    3.30    5.60
 -13  11   4    6.00    7.30
 -11 -11   4  240.28   23.40
 -11  11   4  201.58   21.10
  11  11  -4  207.98   16.00
  -9 -11   4   53.09   12.40
  -9  11   4   61.39   13.40
   9  11  -4   55.99    9.80
  -7 -11   4  485.25   28.50
   7  11  -4  465.35   22.20
  -7  11   4  446.46   29.10
  -5 -11   4  221.58   19.90
   5  11  -4  280.37   17.60
  -5  11   4  173.08   20.80
   5  11  -4  243.18   17.00
   3 -11  -4   65.49   12.70
  -3 -11   4   59.09   11.00
  -3  11   4   47.70   11.50
   3  11  -4   56.99    9.20
   3  11  -4   69.49   10.70
  -1 -11   4   84.39   12.20
   1 -11  -4   96.19   14.10
   1  11  -4   92.49   12.10
   1  11  -4   95.09   12.30
  -1  11   4  129.09   16.90
  -1 -11  -4  307.17   22.90
  -1  11  -4  264.57   19.40
   1  11   4  293.17   21.00
  -1  11  -4  267.27   18.40
  -3 -11  -4  395.56   27.20
  -3  11  -4  415.16   22.70
  -3  11  -4  370.56   23.20
   3  11   4  429.86   23.90
  -5 -11  -4  365.76   27.80
  -5  11  -4  381.46   22.50
  -5  11  -4  387.16   24.10
  -7 -11  -4   21.70   10.80
  -7  11  -4   20.90    8.70
  -7  11  -4   26.50    8.30
  -9 -11  -4    3.10    9.10
  -9  11  -4    6.10    7.20
  -9  11  -4    2.00    8.50
 -11 -11  -4  128.49   21.70
 -11  11  -4   97.19   15.00
 -11  11  -4  101.79   14.90
 -13 -11  -4  175.58   24.30
  13 -11   4  236.18   19.40
 -13  11  -4  214.08   23.10
 -13  11  -4  225.28   23.10
  15 -11   4   78.69   12.80
 -15 -11  -4   64.79   18.80
 -15  11  -4   84.89   16.40
 -15  11  -4   45.40   12.70
 -18 -12   4   -6.50   12.50
 -18  12   4   14.30   10.80
 -16 -12   4   -5.50   11.20
 -16  12   4   12.70    9.70
 -14 -12   4    9.60   11.00
 -14  12   4    9.70    9.50
  14  12  -4   18.00    7.60
 -12 -12   4   12.90    9.90
 -12  12   4   12.90    9.30
  12  12  -4   -2.60    6.30
 -10 -12   4   14.60    9.40
  10  12  -4   21.40    7.90
 -10  12   4    8.90    9.60
  -8 -12   4    1.80    8.40
   8  12  -4   16.70    7.10
  -8  12   4   -3.30    7.40
  -6 -12   4   24.20   10.10
   6  12  -4   19.70    8.00
  -6  12   4   19.20   10.70
  -4 -12   4   -4.30    6.00
   4  12  -4    5.40    5.70
  -4  12   4   -7.60    7.60
   4  12  -4   -1.00    5.80
  -2 -12   4   34.80    9.10
  -2  12   4   24.00    9.70
   2  12  -4   46.60    9.70
   2  12  -4   33.30    7.80
   0 -12  -4    0.50    7.60
   0  12  -4    5.00    5.60
   0  12   4    6.00    6.90
   0  12  -4    4.30    6.70
  -2 -12  -4   16.30    9.80
  -2  12  -4   13.40    6.90
   2  12   4   20.80    7.90
  -2  12  -4   15.50    8.00
  -4 -12  -4    1.60    8.80
  -4  12  -4    1.20    5.60
  -4  12  -4   -3.20    6.80
  -6 -12  -4   18.90   10.90
  -6  12  -4   26.20    9.10
  -6  12  -4    5.00    6.70
  -8 -12  -4   61.29   15.50
  -8  12  -4   75.49   13.70
  -8  12  -4   67.29   12.20
 -10 -12  -4   21.90   12.10
 -10  12  -4   18.20   10.90
 -10  12  -4   48.70   12.00
 -12 -12  -4   54.39   16.90
 -12  12  -4   60.59   13.60
 -12  12  -4   52.09   13.40
 -15 -13   4   -3.40   12.20
 -15  13   4    5.80    9.50
 -13 -13   4    2.80   10.80
 -13  13   4   11.00   11.00
 -11 -13   4   58.39   15.40
 -11  13   4   39.80   12.40
  -9 -13   4   29.60   12.00
  -9  13   4   41.20   12.70
   9  13  -4   39.90    9.70
  -7 -13   4  246.88   23.70
   7  13  -4  220.48   17.80
  -7  13   4  243.48   25.30
  -5 -13   4   -4.00    6.80
   5  13  -4    0.80    6.40
  -5  13   4    1.10    7.90
  -3  13   4   10.80    9.10
   3  13  -4   14.60    7.80
   3  13  -4   19.70    7.00
  -1  13   4   -2.60    7.50
   1  13  -4    8.70    6.80
   1  13  -4   10.50    7.40
  -1 -13  -4   67.59   14.30
  -1  13  -4   70.19   12.00
  -1  13  -4   68.29   11.20
   1  13   4   50.39   11.50
  -3 -13  -4   40.90   13.30
  -3  13  -4   50.69   10.90
  -3  13  -4   39.10   10.50
  -5 -13  -4   43.10   14.00
  -5  13  -4   32.60    9.80
  -5  13  -4   49.90   12.00
  -7 -13  -4  106.19   19.60
  -7  13  -4  112.69   16.80
  -7  13  -4   89.79   14.60
  -9 -13  -4   32.30   14.30
  -9  13  -4   22.60   11.00
  -9  13  -4   24.30   11.20
 -11 -13  -4    7.10   12.90
 -11  13  -4   12.00   10.70
 -11  13  -4    4.80    9.10
 -12 -14   4    6.20   12.30
 -12  14   4   -4.70    9.60
 -10 -14   4   82.69   17.10
 -10  14   4   72.99   15.80
  -8 -14   4  272.67   26.70
  -8  14   4  268.57   28.60
  -6 -14   4   62.89   13.70
  -6  14   4   66.49   14.80
  -4  14   4   30.00   11.20
   4  14  -4   23.40    9.60
   2  14  -4    4.10    6.30
   2  14  -4   -7.10    7.20
  -2  14   4    1.70    8.10
   0  14  -4   40.10   10.40
   0  14  -4   53.09   11.20
   0  14   4   52.79   12.90
  -2 -14  -4  191.68   32.60
  -2  14  -4  257.47   21.50
  -2  14  -4  261.27   23.30
  -4 -14  -4  152.28   22.10
  -4  14  -4  185.48   20.30
  -4  14  -4  195.68   21.60
  -6 -14  -4   50.69   17.20
  -6  14  -4   54.79   12.10
  -6  14  -4   51.09   12.80
  -5  15   4    5.40   10.80
  -3  15   4   15.60   10.60
   1  15  -4   20.70    8.70
  -1  15   4   45.90   12.50
  -1  15  -4   25.60    9.20
  28   0  -5    5.00    7.40
  28   0  -5   26.50   14.60
  26   0  -5    6.70    6.60
  24   0  -5   12.20    6.20
  22   0  -5   15.20    5.30
  20   0  -5   -0.10    3.90
 -18   0   5   -4.70    3.20
  18   0  -5    7.40    3.80
 -16   0   5    0.70    2.70
 -16   0   5    3.00    3.30
  16   0  -5    0.70    3.00
 -14   0   5   18.30    3.40
 -14   0   5   26.20    4.50
  14   0  -5   22.20    3.90
 -12   0   5    8.70    3.00
  12   0  -5    7.70    2.70
 -12   0   5    5.50    2.60
 -10   0   5    4.60    2.20
 -10   0   5    0.30    2.00
  10   0  -5    3.40    2.00
  -8   0   5    3.20    1.80
  -8   0   5    3.40    1.70
   8   0  -5    1.80    1.70
  -6   0   5    2.30    1.70
   6   0  -5    2.50    1.40
  -6   0   5    2.30    1.40
  -4   0   5    2.50    1.50
  -4   0   5    0.00    1.80
   4   0  -5    6.70    1.80
  -2   0   5    1.30    2.10
  -2   0   5   -0.20    1.70
   0   0  -5    2.80    1.70
   0   0   5    2.70    2.10
   0   0   5    2.60    1.70
   2   0   5    4.30    1.80
  -2   0  -5    5.80    2.10
   2   0   5    3.60    1.50
   2   0   5    2.50    2.20
   4   0   5   -0.40    1.50
   4   0   5    1.40    2.20
   4   0   5    2.90    1.80
  -4   0  -5    0.30    2.30
  -6   0  -5    1.70    2.70
  -6   0  -5   -1.80    1.90
   6   0   5    2.00    1.90
   6   0   5   -2.90    2.20
  -6   0  -5   -0.30    3.00
   6   0   5   -3.10    1.50
  -8   0  -5    4.70    3.70
   8   0   5    5.80    2.70
   8   0   5    6.30    2.60
  -8   0  -5    3.10    2.50
   8   0   5    4.80    3.10
  -8   0  -5   -0.70    3.00
 -10   0  -5   12.80    4.60
 -10   0  -5   15.80    3.90
  10   0   5   12.10    4.30
  10   0   5   17.00    3.80
 -10   0  -5   15.10    4.50
  10   0   5   15.80    3.70
  12   0   5   13.40    4.10
 -12   0  -5   11.00    5.60
  12   0   5   13.40    4.10
 -12   0  -5   14.90    5.80
 -12   0  -5    9.90    4.20
  12   0   5    2.60    4.30
 -14   0  -5  -12.60    4.70
  14   0   5   -3.60    3.80
 -14   0  -5   -1.70    5.60
  14   0   5   -3.00    4.20
  14   0   5   -1.60    3.80
 -14   0  -5   -6.20    3.60
  16   0   5   -5.10    4.40
 -16   0  -5  -16.60    6.10
  16   0   5  -10.20    4.50
 -16   0  -5   -7.50    6.50
  18   0   5   -4.50    5.30
 -18   0  -5   -5.00    8.00
  20   0   5   -3.60    5.50
 -20   0  -5   -0.70    7.90
  22   0   5   -0.60    5.80
 -22   0  -5    6.10    9.40
  27  -1  -5    6.00    7.50
  27   1  -5    7.00    7.30
  27   1  -5   16.20   13.20
  25  -1  -5  144.69   14.30
  25   1  -5  142.99   20.20
  25   1  -5  157.38   14.50
  23  -1  -5   78.29   10.00
  23   1  -5  102.79   16.20
  23   1  -5  107.59   11.90
  21  -1  -5   42.50    7.20
 -21  -1   5   41.90    8.20
  21   1  -5   52.69    8.00
  21   1  -5   56.99   12.70
 -19  -1   5    0.20    5.30
  19  -1  -5    4.00    4.20
  19   1  -5    4.50    4.20
 -19   1   5   -5.10    5.30
  17  -1  -5  115.69    8.80
 -17  -1   5  115.69   11.30
 -17   1   5  113.89    9.00
 -17   1   5  117.99    9.90
  17   1  -5  108.39    8.90
  15  -1  -5 1477.95   35.40
 -15  -1   5 1561.54   41.10
 -15   1   5 1464.05   36.50
  15   1  -5 1521.95   36.10
 -15   1   5 1593.84   36.40
  13  -1  -5 1211.08   29.00
 -13  -1   5 1251.27   33.80
 -13   1   5 1257.77   29.40
 -13   1   5 1168.58   30.20
  13   1  -5 1219.48   29.40
 -11  -1   5 2382.66   52.39
  11  -1  -5 2315.47   47.40
  11   1  -5 2260.17   52.49
 -11   1   5 2208.08   49.20
  11   1  -5 2338.87   48.10
 -11   1   5 2335.17   47.90
  -9  -1   5  338.67   13.00
   9  -1  -5  332.37   10.30
  -9  -1   5  318.47   10.30
  -9   1   5  334.27   10.80
  -9   1   5  309.17   12.00
   9   1  -5  345.77   13.30
   9   1  -5  341.37   10.80
  -7  -1   5  393.76   12.00
   7  -1  -5  395.66   10.70
  -7  -1   5  423.26   13.60
  -7   1   5  383.86   13.10
  -7   1   5  411.46   11.90
   7   1  -5  396.16   11.60
  -5  -1   5  899.11   22.00
   5  -1  -5  890.91   18.60
  -5  -1   5  847.02   21.40
  -5   1   5  903.21   20.70
  -5   1   5  869.31   22.10
   5   1  -5  863.41   20.30
  -3  -1   5 2391.36   49.40
  -3  -1   5 2367.56   48.10
   3  -1  -5 2454.55   44.70
  -3   1   5 2432.66   47.90
   3   1  -5 2342.07   47.50
  -3   1   5 2234.88   48.80
  -1  -1   5 1481.65   33.80
   1  -1  -5 1474.95   28.90
  -1  -1   5 1430.96   31.40
  -1   1   5 1436.36   33.00
  -1   1   5 1470.35   31.60
   1   1  -5 1413.76   31.60
   1  -1   5  795.92   21.90
   1  -1   5  794.82   19.40
  -1  -1  -5  778.82   18.00
   1   1   5  788.82   19.70
  -1   1  -5  773.82   20.40
   1   1   5  766.42   21.00
   1   1   5  699.13   16.30
   3  -1   5  357.76   13.90
   3  -1   5  325.27   10.60
  -3  -1  -5  347.77   11.40
   3  -1   5  367.26   11.60
   3   1   5  336.77    9.30
  -3   1  -5  326.87   11.80
  -3   1  -5  345.67   12.80
   3   1   5  352.56   13.30
   3   1   5  348.47   12.00
  -5  -1  -5  251.07   10.50
   5  -1   5  242.38    9.30
  -5  -1  -5  256.57   13.30
   5  -1   5  246.38   12.40
   5  -1   5  243.58    9.80
  -5   1  -5  232.08   10.40
  -5   1  -5  234.28   11.70
   5   1   5  238.98    8.20
   5   1   5  243.98   11.90
   5   1   5  248.48   10.30
   7  -1   5  567.14   20.60
  -7  -1  -5  599.44   19.50
   7  -1   5  587.04   16.80
  -7  -1  -5  606.34   23.00
   7  -1   5  581.54   17.40
  -7   1  -5  595.74   20.70
   7   1   5  580.54   18.60
   7   1   5  593.84   19.90
   7   1   5  579.44   15.70
  -7   1  -5  612.74   21.00
  -7   1  -5  586.74   18.60
   9  -1   5  307.47   12.40
  -9  -1  -5  310.77   16.80
   9  -1   5  298.77   11.90
   9  -1   5  318.97   15.90
  -9  -1  -5  300.37   12.80
   9   1   5  309.87   14.50
  -9   1  -5  315.97   15.80
  -9   1  -5  286.27   15.30
  -9   1  -5  305.57   13.50
   9   1   5  315.57   11.40
   9   1   5  323.57   13.60
  11  -1   5  667.43   20.70
 -11  -1  -5  674.03   27.40
  11  -1   5  657.73   24.80
  11  -1   5  674.93   20.40
 -11  -1  -5  661.03   20.70
  11   1   5  663.03   23.00
 -11   1  -5  661.13   24.90
 -11   1  -5  668.63   22.10
  11   1   5  649.34   22.00
  11   1   5  674.23   19.60
 -11   1  -5  660.63   25.50
 -13  -1  -5  177.58   16.70
  13  -1   5  175.28   11.00
  13  -1   5  188.18   14.50
 -13  -1  -5  193.88   11.70
  13  -1   5  180.18   11.20
 -13   1  -5  194.58   12.80
 -13   1  -5  178.58   14.60
 -13   1  -5  166.48   15.30
  13   1   5  175.28   13.30
  13   1   5  178.78   12.60
  13   1   5  196.38   10.80
  15  -1   5    1.00    5.50
  15  -1   5    7.00    4.60
 -15  -1  -5   -1.90    7.20
  15   1   5   -0.90    4.70
 -15   1  -5    2.80    4.10
 -15   1  -5   -3.30    6.20
  15   1   5    0.60    4.10
 -15   1  -5   -0.60    6.70
  17  -1   5    7.90    5.00
 -17  -1  -5   -5.40    7.40
 -17   1  -5    7.10    7.50
  17   1   5   -2.50    4.50
  19  -1   5   23.70    6.70
 -19   1  -5   25.90   10.00
  19   1   5   26.10    7.10
 -21  -1  -5   11.20   10.40
  21  -1   5   27.30    8.00
 -21   1  -5   17.00   10.50
  21   1   5   31.10    8.10
 -23  -1  -5   10.10   11.10
  23  -1   5   11.20    7.60
  23   1   5    9.10    7.00
  23   1   5   -3.80   14.20
 -23   1  -5   -2.20   11.00
  28  -2  -5   -0.90    8.00
  28   2  -5   -3.40   12.30
  28   2  -5    8.00    7.60
  26  -2  -5   40.30    9.20
  26   2  -5   61.79   10.00
  26   2  -5   66.09   16.50
  24  -2  -5  135.09   13.40
  24   2  -5  142.39   13.70
  24   2  -5  157.08   19.90
  22  -2  -5   83.39    9.70
 -22  -2   5   67.19   10.40
  22   2  -5   81.99   14.50
  22   2  -5   66.89    9.00
 -20  -2   5    6.70    6.40
  20  -2  -5    4.60    4.20
  20   2  -5  -10.40    6.70
  20   2  -5    0.20    4.30
 -18  -2   5  130.59   13.60
  18  -2  -5  125.29    9.80
 -18   2   5  139.69   12.40
  18   2  -5  148.39   14.60
  18   2  -5  141.99   10.40
 -16  -2   5 1085.59   35.10
  16  -2  -5 1112.79   28.70
 -16   2   5 1095.69   31.70
 -16   2   5 1155.88   27.20
  16   2  -5 1084.69   29.10
  16   2  -5 1064.39   35.60
  14  -2  -5 2348.97   50.79
 -14  -2   5 2388.66   58.59
  14   2  -5 2351.56   51.59
 -14   2   5 2490.95   49.60
  14   2  -5 2421.46   58.79
 -14   2   5 2390.66   54.79
 -12  -2   5 4408.46   94.09
  12  -2  -5 4437.36   85.99
 -12   2   5 4258.97   89.89
  12   2  -5 4440.56   87.09
 -12   2   5 4589.34   85.09
  12   2  -5 4475.15   93.49
 -10  -2   5  667.93   22.50
  10  -2  -5  677.13   17.10
 -10   2   5  712.63   17.20
  10   2  -5  695.63   18.50
 -10   2   5  628.64   20.20
  -8  -2   5 1370.46   34.60
  -8  -2   5 1394.06   30.00
   8  -2  -5 1375.06   28.70
  -8   2   5 1451.45   29.70
   8   2  -5 1343.77   30.40
  -8   2   5 1294.37   32.80
  -6  -2   5  582.24   18.00
  -6  -2   5  608.24   16.40
   6  -2  -5  575.14   13.40
   6   2  -5  583.94   15.90
  -6   2   5  561.44   17.80
  -6   2   5  615.84   15.30
  -4  -2   5  341.77   12.00
   4  -2  -5  354.96    8.20
  -4  -2   5  357.26   12.20
  -4   2   5  331.77   12.30
   4   2  -5  339.87   11.40
  -4   2   5  340.97   10.60
  -2  -2   5  540.15   15.10
  -2  -2   5  528.05   16.40
   2   2  -5  517.55   14.50
  -2   2   5  519.25   15.90
   2   2  -5  501.65   15.30
  -2   2   5  528.45   14.60
   0  -2   5 1411.96   34.00
   0  -2   5 1488.75   31.40
   0   2  -5 1379.66   31.60
   0   2  -5 1416.46   33.00
   0   2   5 1420.06   33.10
   0   2   5 1398.86   31.60
   2  -2   5   66.49    4.80
   2  -2   5   60.99    4.80
  -2  -2  -5   70.69    6.80
   2  -2   5   56.89    6.30
  -2   2  -5   58.99    5.20
  -2   2  -5   61.89    5.90
   2   2   5   64.89    5.20
   2   2   5   67.59    6.00
  -4  -2  -5  422.56   12.90
   4  -2   5  422.46   16.50
   4  -2   5  421.26   12.90
  -4  -2  -5  430.36   17.60
   4  -2   5  414.16   13.20
  -4   2  -5  398.76   15.40
   4   2   5  408.96   10.60
  -4   2  -5  409.56   14.30
   4   2   5  401.26   14.50
   4   2   5  408.16   14.90
   4   2   5  416.06   14.30
  -6  -2  -5  675.93   24.80
   6  -2   5  675.33   18.50
   6  -2   5  664.43   18.60
   6  -2   5  671.13   23.20
  -6   2  -5  668.13   22.40
   6   2   5  664.93   22.00
   6   2   5  683.23   20.60
   6   2   5  667.23   21.00
   6   2   5  677.63   16.40
  -6   2  -5  643.54   20.10
   8  -2   5 1488.85   40.50
  -8  -2  -5 1507.35   43.20
   8  -2   5 1472.45   34.60
   8  -2   5 1496.75   34.20
   8   2   5 1458.15   39.90
  -8   2  -5 1510.55   40.50
   8   2   5 1506.05   37.30
   8   2   5 1479.15   37.30
  -8   2  -5 1489.15   37.20
  -8   2  -5 1499.75   38.20
   8   2   5 1503.85   32.60
  10  -2   5 1272.77   32.00
 -10  -2  -5 1279.27   32.10
  10  -2   5 1327.57   38.40
  10  -2   5 1243.48   31.20
 -10  -2  -5 1365.46   42.10
 -10   2  -5 1290.67   36.10
 -10   2  -5 1301.77   38.30
  10   2   5 1253.87   34.20
  10   2   5 1294.47   38.90
  10   2   5 1305.37   30.30
 -10   2  -5 1338.17   35.10
  10   2   5 1304.27   35.00
 -12  -2  -5  904.41   25.40
  12  -2   5  914.81   25.90
  12  -2   5  909.31   31.80
  12  -2   5  887.21   24.80
 -12  -2  -5  892.91   34.90
  12   2   5  850.11   27.40
 -12   2  -5  897.21   29.40
  12   2   5  911.51   24.30
  12   2   5  907.61   28.80
 -12   2  -5  941.01   28.60
 -12   2  -5  870.21   31.80
  12   2   5  889.51   33.10
 -14  -2  -5  103.69   14.30
  14  -2   5  130.49   14.10
  14  -2   5  126.19   10.50
  14   2   5  117.89    9.60
  14   2   5  103.39   15.00
  14   2   5  131.69   12.30
 -14   2  -5  144.79   15.00
 -14   2  -5  121.49   11.80
  16  -2   5   58.49    8.40
 -16  -2  -5   49.99   11.90
  16   2   5   55.29   12.60
 -16   2  -5   53.89   11.10
  16   2   5   48.70    7.30
 -16   2  -5   37.40    7.10
  18  -2   5   19.90    7.10
 -18  -2  -5   20.90    9.40
  18   2   5   28.40   12.20
  18   2   5   25.20    6.50
 -18   2  -5   29.90   10.20
  20  -2   5    9.30    7.00
  20   2   5    9.50    6.50
  20   2   5    4.90   12.20
 -20   2  -5   19.30   11.30
  22  -2   5   12.50    7.50
  22   2   5   11.20   13.10
  22   2   5    9.50    7.00
  27  -3  -5    5.80    7.40
  27   3  -5   19.10   12.70
  27   3  -5   13.90    8.30
  25  -3  -5    9.90    6.90
  25   3  -5    9.80    6.70
  25   3  -5    7.20   10.30
 -23  -3   5    7.40    7.20
  23  -3  -5    0.40    5.40
  23   3  -5    8.60    5.60
  23   3  -5    1.10    8.90
  21  -3  -5   19.10    6.30
 -21  -3   5   11.90    7.70
  21   3  -5   12.30    5.60
  21   3  -5   27.00   10.40
  19  -3  -5   84.89    9.40
 -19  -3   5   80.09   12.40
  19   3  -5   86.39    9.70
  19   3  -5  103.39   14.10
 -19   3   5   56.69    8.90
 -17  -3   5  301.57   19.60
  17  -3  -5  305.07   13.50
  17   3  -5  323.37   14.30
  17   3  -5  324.47   19.20
 -17   3   5  305.97   17.70
 -15  -3   5  660.73   27.20
  15  -3  -5  679.93   20.00
 -15   3   5  650.03   24.30
  15   3  -5  681.53   20.80
 -13  -3   5 1081.89   34.80
  13  -3  -5 1093.99   26.60
 -13   3   5 1081.59   32.00
  13   3  -5 1079.09   27.70
  11  -3  -5 1461.35   32.40
 -11  -3   5 1464.85   40.90
 -11   3   5 1419.56   38.10
 -11   3   5 1490.35   31.10
  11   3  -5 1517.25   34.30
   9  -3  -5  661.63   16.60
  -9  -3   5  678.23   23.60
  -9   3   5  700.03   16.70
   9   3  -5  669.03   18.60
  -9   3   5  657.93   21.80
   7  -3  -5 1124.29   23.00
  -7  -3   5 1080.79   25.30
  -7  -3   5 1056.19   29.90
  -7   3   5 1051.29   28.80
   7   3  -5 1064.89   26.10
  -7   3   5 1098.99   24.10
   7   3  -5 1055.39   23.50
   5  -3  -5   60.69    3.00
  -5  -3   5   53.29    5.50
  -5  -3   5   60.09    6.00
  -5   3   5   58.69    6.20
  -5   3   5   61.99    4.40
   5   3  -5   60.09    5.40
   5   3  -5   51.99    4.10
  -3  -3   5  264.07   10.80
  -3  -3   5  257.97   11.00
  -3   3   5  250.47    9.20
   3   3  -5  244.98    9.20
   3   3  -5  259.47   10.60
  -3   3   5  256.27   11.40
  -1  -3   5   68.39    5.20
  -1  -3   5   65.99    6.50
  -1   3   5   61.29    5.90
  -1   3   5   67.59    5.10
   1   3  -5   60.29    5.70
   1   3  -5   61.19    5.00
  -1  -3  -5   82.59    7.60
   1  -3   5   79.19    5.40
   1  -3   5   76.49    7.70
   1   3   5   86.39    5.90
  -1   3  -5   85.29    6.20
   1   3   5   72.79    6.20
  -1   3  -5   73.59    6.90
  -3  -3  -5  405.66   17.70
   3  -3   5  400.16   16.80
   3  -3   5  386.56   13.40
   3  -3   5  403.96   12.50
  -3   3  -5  397.56   15.80
   3   3   5  389.36   14.20
   3   3   5  405.16   14.50
  -3   3  -5  384.66   14.10
   5  -3   5 1023.40   23.80
  -5  -3  -5  990.50   31.80
   5  -3   5  957.00   24.90
   5  -3   5  961.40   30.00
  -5   3  -5  954.20   28.50
   5   3   5  947.91   26.60
  -5   3  -5  964.20   26.70
   5   3   5  955.40   20.90
   5   3   5  983.20   26.60
   7  -3   5  697.93   18.70
  -7  -3  -5  667.53   27.00
   7  -3   5  697.43   20.00
   7  -3   5  658.83   24.80
  -7   3  -5  686.53   24.30
   7   3   5  687.33   21.90
   7   3   5  684.83   16.80
   7   3   5  637.24   23.30
   7   3   5  663.23   22.00
  -7   3  -5  671.23   21.90
   9  -3   5  774.62   20.90
  -9  -3  -5  789.02   31.30
   9  -3   5  831.62   29.00
   9  -3   5  783.62   22.80
   9   3   5  802.02   20.10
   9   3   5  805.62   25.70
  -9   3  -5  815.62   25.60
   9   3   5  780.02   24.70
  -9   3  -5  765.72   24.20
  -9   3  -5  761.62   27.80
   9   3   5  765.42   27.90
  11  -3   5  605.54   20.00
  11  -3   5  553.14   17.40
  11  -3   5  598.14   25.80
 -11  -3  -5  610.74   28.60
 -11  -3  -5  585.64   19.20
  11   3   5  609.24   22.80
  11   3   5  588.54   17.50
  11   3   5  562.54   20.70
  11   3   5  549.95   25.60
 -11   3  -5  541.35   20.80
 -11   3  -5  604.64   22.70
 -11   3  -5  615.44   25.90
 -13  -3  -5  181.58   18.80
  13  -3   5  186.98   12.10
  13  -3   5  192.28   16.00
 -13   3  -5  185.18   16.60
 -13   3  -5  191.38   14.30
  13   3   5  174.18   17.10
  13   3   5  178.38   10.50
  13   3   5  208.68   14.80
 -15  -3  -5   32.50   10.70
  15  -3   5   35.70    6.60
 -15   3  -5   34.20    7.80
  15   3   5   36.90    8.30
  15   3   5   49.20   11.90
 -15   3  -5   41.10   10.60
  15   3   5   30.80    6.60
  17  -3   5   -2.60    5.30
 -17  -3  -5    9.80    8.80
  17   3   5    6.70   10.50
 -17   3  -5   -0.80    5.10
 -17   3  -5    8.50    8.70
  17   3   5   -2.60    4.90
 -19  -3  -5   11.40   10.30
  19  -3   5    9.50    7.20
  19   3   5   18.60   12.70
 -19   3  -5   21.30   11.60
  19   3   5   -0.10    6.00
  21  -3   5    6.10    7.50
  21   3   5   -0.80    5.90
  21   3   5   13.10   14.20
 -21   3  -5    3.70   11.10
  26  -4  -5  269.27   18.50
  26   4  -5  243.58   18.10
 -24  -4   5  346.87   26.50
  24  -4  -5  351.86   19.20
  24   4  -5  348.07   19.30
 -22  -4   5  375.06   25.90
  22  -4  -5  362.96   18.10
  22   4  -5  366.26   18.60
 -20  -4   5  166.58   18.50
  20  -4  -5  122.69   11.20
 -20   4   5  124.99   15.60
  20   4  -5  139.99   11.80
 -18  -4   5  122.09   15.70
  18  -4  -5  115.89    9.70
  18   4  -5  119.59   10.20
 -18   4   5   93.09   11.60
  16  -4  -5   17.00    4.30
 -16  -4   5   18.60    6.90
 -16   4   5   12.80    6.20
  16   4  -5   16.40    4.20
 -14  -4   5   12.50    5.70
  14  -4  -5    9.40    3.30
  14   4  -5    8.00    3.20
 -14   4   5   10.90    5.30
 -12  -4   5    6.20    4.00
  12  -4  -5    8.00    2.80
  12   4  -5   10.20    3.10
 -12   4   5    5.20    3.90
 -10  -4   5   20.70    5.10
  10  -4  -5   32.20    3.70
  10   4  -5   28.10    4.40
 -10   4   5   23.30    4.90
  -8  -4   5 1106.99   33.10
  -8  -4   5 1065.59   25.70
   8  -4  -5 1093.09   23.70
   8   4  -5 1063.39   27.30
  -8   4   5 1092.79   24.00
  -8   4   5 1086.89   31.30
   8   4  -5 1033.00   23.70
  -6  -4   5 1305.67   35.70
  -6  -4   5 1323.77   31.40
   6  -4  -5 1322.47   26.70
  -6   4   5 1287.67   34.50
   6   4  -5 1313.87   32.10
   6   4  -5 1286.17   28.80
  -6   4   5 1325.67   28.70
  -4  -4   5 1095.39   28.60
  -4  -4   5 1093.89   29.90
   4   4  -5 1084.79   25.90
  -4   4   5 1067.19   29.70
   4   4  -5 1128.19   28.60
  -4   4   5 1131.09   25.80
  -2  -4   5 1119.79   28.60
   2  -4  -5 1137.09   30.10
  -2  -4   5 1108.59   29.90
   2   4  -5 1114.49   29.20
   2   4  -5 1114.59   27.10
  -2   4   5 1120.39   26.50
  -2   4   5 1095.89   29.70
   0  -4   5 1047.60   29.90
   0  -4   5 1116.69   26.60
   0  -4  -5 1077.09   30.40
   0   4   5 1031.90   27.90
   0   4  -5 1031.30   26.70
   0   4  -5 1014.00   28.40
   0   4   5 1058.79   26.40
   2  -4   5 1039.30   25.00
  -2  -4  -5 1036.70   31.40
   2  -4   5 1000.90   30.50
   2   4   5  984.30   26.80
  -2   4  -5 1052.79   29.40
   2   4   5 1032.50   27.10
  -2   4  -5 1034.20   27.40
   4  -4   5  234.48    9.30
   4  -4   5  218.58   10.80
  -4  -4  -5  219.58   14.80
   4  -4   5  223.48   14.20
   4   4   5  208.38   11.40
  -4   4  -5  236.38   13.30
  -4   4  -5  225.28   11.90
   4   4   5  217.88   11.10
   6  -4   5  200.38    8.70
   6  -4   5  207.08   10.40
  -6  -4  -5  167.28   14.70
   6  -4   5  187.98   13.90
   6   4   5  177.28   11.90
  -6   4  -5  193.28   11.40
   6   4   5  188.08    6.80
  -6   4  -5  207.28   13.00
   6   4   5  175.78   10.80
   8  -4   5   20.70    3.40
   8  -4   5   17.30    6.30
   8  -4   5   24.50    4.70
  -8  -4  -5    3.20    6.20
   8   4   5   22.80    3.10
  -8   4  -5   19.30    5.90
  -8   4  -5   18.80    4.70
   8   4   5    6.40    5.00
   8   4   5   13.10    4.50
  10  -4   5   31.00    5.60
  10  -4   5   29.80    7.00
 -10  -4  -5   30.60    8.60
  10   4   5   30.60    6.50
 -10   4  -5   22.60    5.10
  10   4   5   25.70    5.50
 -10   4  -5   35.50    8.00
 -10   4  -5   31.40    5.20
  10   4   5   52.19    5.40
  12  -4   5   24.40    6.10
 -12  -4  -5   19.60    8.20
  12   4   5   28.80    6.80
  12   4   5   30.30    4.80
 -12   4  -5   30.20    6.50
 -12   4  -5   34.10    9.20
 -14  -4  -5   21.80    9.60
  14  -4   5   14.50    6.30
  14   4   5   17.60    5.00
 -14   4  -5   21.50   10.00
  14   4   5   37.50   10.20
  14   4   5   30.90    7.80
 -14   4  -5   18.70    6.40
 -16  -4  -5   14.70    9.50
  16  -4   5    9.10    6.10
 -16   4  -5   -3.20    7.90
  16   4   5   11.30    9.30
  16   4   5    5.70    4.90
 -16   4  -5    3.60    5.90
 -18  -4  -5  120.09   18.50
  18  -4   5  100.49   12.00
  18   4   5  112.79   18.10
 -18   4  -5  121.79   16.10
 -18   4  -5  119.89   17.80
  18   4   5   80.09   12.90
 -20  -4  -5  216.38   26.20
  20  -4   5  205.38   17.10
 -20   4  -5  144.59   19.80
  20   4   5  214.08   24.40
  22  -4   5   70.79   11.60
 -22   4  -5   47.50   15.70
  27  -5  -5  248.98   18.90
 -27  -5   5  186.68   27.90
  27   5  -5  243.78   18.50
 -25  -5   5  550.54   34.30
  25  -5  -5  548.35   24.50
  25   5  -5  562.54   25.00
  23  -5  -5  683.23   25.80
 -23  -5   5  674.63   36.40
  23   5  -5  646.14   26.10
 -21  -5   5  642.04   34.30
  21  -5  -5  651.23   23.70
  21   5  -5  633.44   24.40
 -21   5   5  667.33   30.50
  19  -5  -5   94.69    9.90
 -19  -5   5   64.09   12.20
 -19   5   5   86.29   11.80
  19   5  -5   94.39   10.20
 -17  -5   5    0.10    6.10
  17  -5  -5   -1.70    3.60
  17   5  -5    2.10    3.80
  15  -5  -5   52.69    6.00
 -15  -5   5   41.40    8.90
 -15   5   5   49.60    8.70
  15   5  -5   57.49    6.90
 -13  -5   5  561.04   26.40
  13  -5  -5  554.74   17.10
  13   5  -5  606.34   19.60
 -13   5   5  589.04   24.80
  11  -5  -5  353.76   11.90
 -11  -5   5  343.07   19.40
 -11   5   5  364.36   18.80
  11   5  -5  350.56   14.10
  -9  -5   5  591.74   25.00
   9  -5  -5  636.34   16.40
  -9   5   5  665.53   16.00
   9   5  -5  657.73   20.20
  -9   5   5  623.64   24.10
   7  -5  -5 1081.59   23.20
  -7  -5   5  999.60   27.20
   7  -5  -5 1070.49   26.90
  -7  -5   5 1060.29   33.40
  -7   5   5 1098.49   24.40
   7   5  -5 1034.30   25.00
   7   5  -5 1055.39   28.30
  -7   5   5 1053.29   32.30
  -7   5   5 1047.40   26.00
   5  -5  -5 1886.31   42.90
  -5  -5   5 1783.22   43.00
   5  -5  -5 1884.21   36.30
  -5  -5   5 1867.41   47.00
  -5   5   5 1806.72   38.40
  -5   5   5 1822.82   46.00
   5   5  -5 1792.92   40.10
   5   5  -5 1854.31   43.30
  -5   5   5 1879.01   39.50
  -3  -5   5 5010.10  102.89
  -3  -5   5 5135.29  103.49
   3  -5  -5 5178.68  102.99
  -3   5   5 5168.88   98.29
  -3   5   5 5016.80  103.79
   3   5  -5 5012.50  101.99
   3   5  -5 4948.50   98.89
   1  -5  -5 1254.17   34.80
  -1  -5   5 1223.38   31.80
  -1  -5   5 1252.97   34.70
  -1   5   5 1217.08   33.50
   1   5  -5 1287.57   33.70
  -1   5   5 1289.77   30.80
   1   5  -5 1194.78   30.90
  -1  -5  -5 3748.72   82.19
   1  -5   5 3773.72   75.09
   1  -5   5 3720.53   81.49
   1   5   5 3702.33   76.19
  -1   5  -5 3709.73   79.29
   1   5   5 3614.74   77.29
  -1   5  -5 3635.04   76.79
  -3  -5  -5 1235.78   38.20
   3  -5   5 1300.27   30.10
   3  -5   5 1243.38   37.40
  -3   5  -5 1286.97   34.00
   3   5   5 1248.98   32.80
  -3   5  -5 1306.37   35.90
   3   5   5 1271.07   33.20
   5  -5   5  233.28   11.80
   5  -5   5  219.78    9.30
  -5  -5  -5  203.48   15.40
   5  -5   5  214.38   14.90
   5   5   5  222.58   12.40
  -5   5  -5  225.78   12.70
   5   5   5  210.58   11.40
  -5   5  -5  211.28   13.60
   7  -5   5    6.90    3.50
   7  -5   5    6.80    5.60
  -7  -5  -5   -1.00    4.70
   7  -5   5    6.70    2.40
  -7   5  -5   12.50    4.40
   7   5   5   -0.40    3.00
   7   5   5    1.90    3.60
   7   5   5    7.20    2.10
  -7   5  -5    4.30    4.50
   9  -5   5   16.90    4.90
  -9  -5  -5   18.70    7.20
  -9   5  -5    8.80    5.40
   9   5   5    7.00    4.20
   9   5   5   15.40    5.60
  -9   5  -5   15.70    4.90
   9   5   5   19.50    3.40
  11  -5   5    5.50    4.30
 -11  -5  -5   -0.50    6.40
 -11   5  -5    8.30    4.70
  11   5   5   14.90    3.70
 -11   5  -5    5.10    6.10
  11   5   5    4.90    4.80
  13  -5   5  173.48   13.40
 -13  -5  -5  199.18   21.50
  13   5   5  194.28   16.10
  13   5   5  193.68   11.30
 -13   5  -5  209.08   16.30
 -13   5  -5  159.68   17.60
 -15  -5  -5  143.89   19.40
  15  -5   5  157.68   13.10
 -15   5  -5  165.88   16.70
 -15   5  -5  176.58   18.90
  17  -5   5  142.69   14.20
 -17  -5  -5  129.49   20.10
 -17   5  -5  122.49   17.00
 -17   5  -5   87.39   12.20
 -19  -5  -5  359.76   31.70
  19  -5   5  435.16   22.30
 -19   5  -5  468.65   31.20
 -19   5  -5  420.66   26.00
 -21  -5  -5  397.66   35.40
  21  -5   5  382.66   22.50
 -21   5  -5  418.36   31.80
 -26  -6   5  253.77   28.40
  26  -6  -5  272.47   19.40
 -26   6   5  265.37   25.50
  26   6  -5  272.27   19.20
  24  -6  -5  336.97   19.30
 -24  -6   5  276.27   28.00
  24   6  -5  312.27   19.10
 -22  -6   5  805.72   41.10
  22  -6  -5  855.11   28.60
 -22   6   5  870.61   37.20
  22   6  -5  819.82   29.30
 -20  -6   5  179.48   21.80
  20  -6  -5  140.29   12.30
 -20   6   5  159.08   18.50
  20   6  -5  137.79   12.60
 -18  -6   5   80.09   14.10
  18  -6  -5   98.39    9.80
  18   6  -5   85.49    9.50
 -18   6   5  134.59   16.60
  16  -6  -5   37.70    6.00
 -16  -6   5   42.00   10.10
 -16   6   5   29.40    7.80
  16   6  -5   57.39    7.80
  14  -6  -5   83.89    7.40
 -14  -6   5   75.29   11.50
 -14   6   5   69.69    9.90
  14   6  -5   89.29    8.90
  12  -6  -5  302.87   11.60
 -12  -6   5  310.67   20.30
 -12   6   5  282.77   18.40
  12   6  -5  290.97   13.70
 -12   6   5  275.87   14.50
  10  -6  -5  163.78    7.80
 -10  -6   5  161.38   14.50
 -10   6   5  172.78   14.30
 -10   6   5  159.38   10.30
  10   6  -5  169.88   10.60
   8  -6  -5  513.65   14.20
  -8  -6   5  524.45   23.70
   8  -6  -5  514.05   16.90
  -8   6   5  503.85   17.00
   8   6  -5  507.85   16.00
  -8   6   5  522.75   14.60
  -8   6   5  506.15   22.40
   8   6  -5  526.85   18.70
   6  -6  -5  809.62   18.90
  -6  -6   5  769.92   28.50
   6  -6  -5  812.82   24.00
  -6   6   5  803.72   20.90
   6   6  -5  800.72   22.40
  -6   6   5  833.62   28.70
  -6   6   5  831.32   21.50
   6   6  -5  795.52   24.90
   4  -6  -5 2340.57   53.39
  -4  -6   5 2260.87   55.89
  -4   6   5 2265.17   48.60
   4   6  -5 2257.67   50.29
   4   6  -5 2291.07   52.99
  -4   6   5 2231.88   55.39
   2  -6  -5 1988.00   49.20
  -2  -6   5 1939.41   47.90
   2   6  -5 1943.21   45.50
  -2   6   5 1934.11   49.00
  -2   6   5 1980.20   44.20
   2   6  -5 1960.50   47.60
   0  -6   5  857.81   25.40
   0  -6  -5  887.21   29.70
   0   6   5  865.61   25.00
   0   6  -5  839.22   25.80
   0   6   5  878.61   27.70
   0   6  -5  874.51   27.50
  -2  -6  -5  827.22   30.10
   2  -6   5  798.42   22.90
  -2   6  -5  798.32   27.00
   2   6   5  812.12   25.40
  -2   6  -5  798.72   25.60
   2   6   5  786.42   24.70
  -4  -6  -5  359.86   20.60
   4  -6   5  363.16   13.20
   4   6   5  356.26   15.60
  -4   6  -5  365.56   18.10
  -4   6  -5  387.56   17.30
   4   6   5  366.36   16.60
   6  -6   5   19.20    4.80
   6  -6   5   19.50    3.60
  -6  -6  -5   18.10    6.60
  -6   6  -5   17.70    5.90
  -6   6  -5   21.70    5.10
   6   6   5   20.90    5.40
   6   6   5   24.50    5.00
   8  -6   5    6.60    3.80
  -8  -6  -5   11.20    6.20
   8   6   5    9.20    4.50
   8   6   5    6.50    3.30
  -8   6  -5    4.90    3.80
  -8   6  -5    3.70    5.10
  10  -6   5   11.80    5.00
 -10  -6  -5    9.70    7.90
 -10   6  -5   14.20    5.60
  10   6   5    4.80    5.00
 -10   6  -5    9.80    5.90
 -12  -6  -5   79.79   14.40
  12  -6   5   80.69    9.80
 -12   6  -5   72.89   12.10
 -12   6  -5   72.49   10.20
 -14  -6  -5   28.90   12.50
  14  -6   5   14.10    6.20
 -14   6  -5   10.80    8.70
 -14   6  -5   17.30    7.20
 -16  -6  -5  220.08   26.60
  16  -6   5  228.18   16.50
 -16   6  -5  215.98   22.30
 -16   6  -5  232.88   20.00
 -18  -6  -5  240.38   27.90
  18  -6   5  216.98   17.70
 -18   6  -5  218.98   24.00
 -18   6  -5  231.88   20.70
 -20  -6  -5  274.97   31.70
  20  -6   5  282.87   19.80
 -20   6  -5  280.07   27.70
 -20   6  -5  271.17   22.40
 -25  -7   5   34.70   13.50
  25  -7  -5   39.50    9.40
 -25   7   5   53.89   13.50
  25   7  -5   41.40    9.10
  23  -7  -5   82.29   10.40
 -23  -7   5   77.89   17.20
  23   7  -5  101.09   12.30
 -23   7   5   82.09   14.20
 -23   7   5   55.59   12.50
 -21  -7   5  137.99   19.70
  21  -7  -5  177.78   14.20
  21   7  -5  172.78   14.10
 -21   7   5  119.09   15.20
 -21   7   5  169.28   20.10
 -19  -7   5  114.79   18.30
  19  -7  -5  133.59   12.00
 -19   7   5  103.49   13.70
 -19   7   5  105.09   14.20
  19   7  -5  126.99   12.40
 -17  -7   5   91.19   14.70
  17  -7  -5  112.09   10.40
 -17   7   5   86.49   11.80
  17   7  -5  111.19   11.80
 -17   7   5  114.99   15.10
 -15  -7   5   29.70    9.90
  15  -7  -5   30.30    5.50
  15   7  -5   35.60    7.00
 -15   7   5   26.10    8.40
 -15   7   5   28.50    7.60
 -13  -7   5   93.79   13.30
  13  -7  -5  122.49    8.30
  13   7  -5  132.09   10.60
 -13   7   5  106.19   11.00
 -13   7   5  137.49   15.60
 -11  -7   5   53.09   10.20
  11  -7  -5   58.29    5.90
 -11   7   5   56.69   10.00
 -11   7   5   62.19    7.70
  11   7  -5   58.19    7.80
   9  -7  -5  560.94   18.90
  -9  -7   5  537.45   26.30
   9  -7  -5  574.74   16.20
   9   7  -5  532.55   18.00
   9   7  -5  588.64   21.10
  -9   7   5  561.74   15.80
  -9   7   5  549.65   19.50
   7  -7  -5  196.18    8.30
   7  -7  -5  200.38   11.50
  -7  -7   5  210.38   15.80
  -7   7   5  196.28   14.90
   7   7  -5  196.18   10.80
   7   7  -5  195.98   12.50
  -7   7   5  202.98    9.30
  -7   7   5  196.78   10.20
  -5  -7   5  306.37   17.70
   5  -7  -5  298.87   10.00
   5  -7  -5  329.97   15.60
   5   7  -5  331.67   15.70
  -5   7   5  334.67   12.70
  -5   7   5  321.57   11.90
  -5   7   5  315.97   18.20
   5   7  -5  307.87   13.80
  -3  -7   5  213.08   13.70
   3  -7  -5  210.78   13.40
   3   7  -5  181.18   12.10
  -3   7   5  198.68   10.50
   3   7  -5  219.08   11.80
  -3   7   5  212.58   14.30
   1  -7  -5   38.00    7.00
  -1  -7   5   35.70    6.10
   1   7  -5   32.00    5.20
   1   7  -5   30.10    6.50
  -1   7   5   26.40    5.80
  -1   7   5   41.00    5.70
  -1  -7  -5  219.58   15.60
   1  -7   5  195.88   11.90
  -1   7  -5  217.28   14.10
  -1   7  -5  211.28   13.00
   1   7   5  195.98   13.80
   1   7   5  207.78   12.20
   3  -7   5    2.60    3.10
  -3  -7  -5   -1.10    4.90
  -3   7  -5   -1.80    3.10
   3   7   5   -2.40    3.80
   3   7   5   -0.10    3.60
  -3   7  -5    5.90    4.90
  -5  -7  -5  170.08   17.30
   5  -7   5  194.78   10.10
  -5   7  -5  192.38   14.10
   5   7   5  196.88   14.10
   5   7   5  186.48   12.60
  -5   7  -5  208.68   15.40
   7  -7   5  139.09   11.80
  -7  -7  -5  105.99   15.30
   7   7   5  120.89   12.80
  -7   7  -5  136.09   14.20
   7   7   5  122.39   10.50
  -7   7  -5  120.79   12.70
  -9  -7  -5    8.50    8.00
   9  -7   5   16.30    5.70
  -9   7  -5   13.00    5.90
  -9   7  -5    9.10    6.50
   9   7   5   10.80    6.00
  11  -7   5  284.67   16.40
 -11  -7  -5  262.67   24.90
 -11   7  -5  319.07   21.00
 -11   7  -5  279.77   21.10
  13  -7   5   27.60    7.90
 -13  -7  -5   28.70   11.40
 -13   7  -5   28.60    8.90
 -13   7  -5   25.30   10.10
 -15  -7  -5  153.48   22.20
  15  -7   5  179.78   15.80
 -15   7  -5  195.68   19.70
 -15   7  -5  200.48   21.40
  17  -7   5   67.39   11.40
 -17  -7  -5   65.89   16.30
 -17   7  -5   64.49   11.20
 -17   7  -5   68.79   15.80
 -19  -7  -5   53.79   17.80
  19  -7   5   45.50   10.30
 -19   7  -5   43.00   10.30
 -19   7  -5   44.90   14.10
 -24  -8   5   42.20   14.80
  24  -8  -5   61.19   10.30
 -24   8   5   35.30   12.50
  24   8  -5   59.69   10.40
 -24   8   5   51.59   12.60
  22  -8  -5   17.20    6.90
 -22  -8   5    7.40   11.10
 -22   8   5    6.20    8.50
  22   8  -5   20.90    7.00
 -22   8   5    7.20    9.40
 -20  -8   5   13.80   11.40
  20  -8  -5    5.50    5.50
  20   8  -5    8.60    5.30
 -20   8   5    0.00    7.40
 -20   8   5    9.20    8.20
 -18  -8   5   84.29   15.60
  18  -8  -5   87.99    9.80
  18   8  -5   88.09   10.70
 -18   8   5   91.69   13.70
 -18   8   5   81.59   13.60
  16  -8  -5  451.75   17.90
 -16  -8   5  406.56   29.20
 -16   8   5  476.45   28.10
  16   8  -5  452.65   20.40
 -16   8   5  431.06   23.20
  14  -8  -5  621.14   20.30
 -14  -8   5  589.54   32.80
 -14   8   5  652.53   32.00
  14   8  -5  620.34   23.50
 -14   8   5  604.94   25.40
 -12  -8   5  833.22   37.20
  12  -8  -5  850.51   23.60
  12   8  -5  863.51   28.20
 -12   8   5  816.02   28.40
 -12   8   5  879.51   35.70
  10  -8  -5  446.46   14.90
 -10  -8   5  447.46   25.70
 -10   8   5  429.96   18.20
  10   8  -5  422.86   19.00
 -10   8   5  469.85   25.10
  -8  -8   5  297.17   20.50
   8  -8  -5  340.77   12.20
  -8   8   5  367.06   13.90
  -8   8   5  349.17   14.70
   8   8  -5  330.57   16.70
  -8   8   5  357.66   21.30
   8   8  -5  349.87   15.30
   6  -8  -5    0.70    3.20
   6  -8  -5    3.90    2.30
  -6  -8   5    3.40    4.60
  -6   8   5    3.70    4.50
  -6   8   5    5.90    3.20
  -6   8   5    4.80    2.90
   6   8  -5    3.80    3.70
   6   8  -5    3.30    2.80
   4  -8  -5   64.89    8.70
  -4  -8   5   60.29    8.90
  -4   8   5   81.29    7.90
   4   8  -5   80.49    9.60
  -4   8   5   68.79    9.70
   4   8  -5   78.59    8.50
   2  -8  -5   44.60    8.00
  -2  -8   5   48.20    7.60
   2   8  -5   56.29    8.40
   2   8  -5   44.10    6.80
  -2   8   5   45.50    7.90
  -2   8   5   43.30    6.20
   0  -8   5  330.07   16.50
   0  -8  -5  338.77   19.70
   0   8   5  336.27   15.80
   0   8  -5  317.97   17.40
   0   8   5  314.67   18.00
   0   8  -5  325.97   16.70
  -2  -8  -5    8.10    5.50
   2  -8   5    1.40    3.10
   2   8   5    1.80    3.70
  -2   8  -5    0.70    4.60
  -2   8  -5    4.30    3.60
   2   8   5    1.70    4.70
   4  -8   5   42.70    8.20
  -4  -8  -5   32.40    8.90
   4   8   5   39.60    7.60
  -4   8  -5   29.60    7.90
   4   8   5   22.30    6.50
  -4   8  -5   34.80    6.70
  -6  -8  -5  214.18   20.90
  -6   8  -5  271.97   18.80
  -6   8  -5  253.17   17.80
   6   8   5  208.08   14.80
   6   8   5  213.78   16.30
  -8  -8  -5  411.26   28.80
   8  -8   5  471.15   21.30
  -8   8  -5  454.35   24.80
  -8   8  -5  482.05   24.70
  10  -8   5  731.43   27.30
 -10  -8  -5  672.13   37.40
 -10   8  -5  729.63   31.50
 -10   8  -5  703.73   32.30
  12  -8   5  259.97   17.40
 -12  -8  -5  273.27   27.50
 -12   8  -5  307.77   22.00
 -12   8  -5  277.57   23.00
 -14  -8  -5  248.88   28.60
  14  -8   5  273.57   18.50
 -14   8  -5  300.37   24.50
 -14   8  -5  317.17   23.40
 -16  -8  -5    4.40   11.60
  16  -8   5   -1.60    6.50
 -16   8  -5    5.50    7.60
 -16   8  -5   11.40   10.00
  18  -8   5  -11.60    6.50
 -18  -8  -5   -7.60   11.70
 -18   8  -5   -6.40    6.30
 -18   8  -5    9.70   10.80
  23  -9  -5   48.00    8.90
 -23  -9   5   37.40   14.90
 -23   9   5   29.70   12.40
  23   9  -5   61.49   10.60
 -23   9   5   56.89   13.50
  21  -9  -5   34.20    7.70
 -21   9   5   28.70   10.40
  21   9  -5   36.50    8.40
 -21   9   5    9.60   10.10
 -19  -9   5    4.20   10.00
  19  -9  -5    1.20    5.30
 -19   9   5   -7.30    7.30
  19   9  -5   -0.90    4.60
 -19   9   5   -9.90    7.80
 -17  -9   5  147.89   21.10
  17  -9  -5  140.99   11.50
 -17   9   5  123.69   14.70
  17   9  -5  121.49   12.80
 -17   9   5  132.99   17.50
 -15  -9   5  599.04   34.90
  15  -9  -5  580.84   20.60
 -15   9   5  541.45   25.70
 -15   9   5  597.74   32.30
  15   9  -5  596.84   24.30
  13  -9  -5  417.66   16.50
 -13  -9   5  406.56   28.00
  13   9  -5  426.16   20.40
 -13   9   5  443.56   28.00
 -13   9   5  411.46   21.10
 -11  -9   5  535.35   30.10
  11  -9  -5  544.95   18.60
 -11   9   5  573.14   23.00
 -11   9   5  561.34   30.00
  11   9  -5  556.44   23.30
  -9  -9   5  265.67   20.60
   9  -9  -5  213.38   11.10
  -9   9   5  189.68   13.70
  -9   9   5  244.58   20.10
   9   9  -5  242.38   15.90
  -7  -9   5   35.20    8.80
   7   9  -5   35.80    7.40
  -7   9   5   28.20    7.50
   7   9  -5   27.70    5.80
  -5  -9   5  115.09   13.80
   5  -9  -5  142.99   12.30
   5   9  -5  128.99   11.30
  -5   9   5  151.88   10.00
   5   9  -5  151.78   13.00
  -5   9   5  141.59   15.90
  -3  -9   5  329.67   19.60
   3  -9  -5  310.67   18.80
   3   9  -5  360.16   18.50
  -3   9   5  341.67   15.70
  -3   9   5  333.07   20.50
   3   9  -5  330.17   17.40
  -1  -9   5  639.64   26.00
   1  -9  -5  629.04   28.10
  -1   9   5  658.63   28.00
  -1   9   5  640.74   23.40
   1   9  -5  637.24   25.40
   1   9  -5  608.34   24.90
   1  -9   5  217.08   14.20
  -1  -9  -5  228.08   18.80
   1   9   5  236.08   16.90
   1   9   5  234.28   15.10
  -1   9  -5  219.78   16.00
  -1   9  -5  223.28   15.70
  -3  -9  -5   -2.90    5.80
  -3   9  -5   -2.00    3.70
   3   9   5   -5.90    4.20
  -3   9  -5  -11.80    5.00
  -5  -9  -5   55.29   11.70
   5   9   5   55.89    9.30
  -5   9  -5   53.99    8.90
  -5   9  -5   57.29   10.50
  -7  -9  -5  279.67   24.50
  -7   9  -5  285.97   20.80
  -7   9  -5  321.17   20.80
  -9  -9  -5  665.13   37.10
   9  -9   5  612.94   26.00
  -9   9  -5  703.03   31.10
  -9   9  -5  610.84   30.40
  11  -9   5  394.06   21.50
 -11  -9  -5  382.96   31.50
 -11   9  -5  425.26   25.80
 -11   9  -5  384.66   25.80
 -13  -9  -5   59.59   15.90
  13  -9   5   60.99   10.50
 -13   9  -5   57.69   11.50
 -13   9  -5   81.59   14.20
 -15  -9  -5   11.30   12.70
  15  -9   5   22.20    8.30
 -15   9  -5   20.80   11.20
 -15   9  -5   13.60    8.20
 -17  -9  -5   22.20   15.50
  17  -9   5    9.60    8.20
 -17   9  -5   14.60    9.40
 -17   9  -5   26.50   12.70
  20 -10  -5   20.00    6.70
 -20 -10   5    6.30   13.30
 -20  10   5   20.30    9.60
 -20  10   5    2.60   10.30
  20  10  -5   21.00    7.70
  18 -10  -5    8.20    5.00
 -18 -10   5    4.40   12.00
  18  10  -5   -0.20    5.70
 -18  10   5    9.20    7.90
 -18  10   5   -6.10    8.10
 -16 -10   5   14.90   10.80
  16 -10  -5   23.30    5.70
 -16  10   5   15.00    8.90
  16  10  -5   16.10    6.70
 -16  10   5   28.90    8.10
 -14 -10   5   52.79   12.50
  14 -10  -5   44.90    6.90
 -14  10   5   52.69   12.50
  14  10  -5   54.19    9.30
 -14  10   5   69.29   13.60
 -12 -10   5  157.28   19.80
  12 -10  -5  165.88   17.20
 -12  10   5  106.89   14.80
  12  10  -5  144.19   14.10
 -10 -10   5    9.70    7.30
  10  10  -5   -1.30    6.30
 -10  10   5    6.50    8.20
  -8 -10   5  190.18   19.00
   8  10  -5  163.58   14.90
  -8  10   5  169.28   19.40
  -6 -10   5   61.89   11.20
   6  10  -5   82.79   11.40
  -6  10   5   71.19   11.60
   6  10  -5   59.69    8.70
   4 -10  -5  116.29   13.90
  -4 -10   5   99.79   13.20
  -4  10   5  104.09   13.80
   4  10  -5  100.59   12.10
   4  10  -5   88.39   11.60
   2 -10  -5  155.08   15.70
  -2 -10   5  121.59   14.20
   2  10  -5  152.18   14.50
   2  10  -5  141.39   13.70
  -2  10   5  168.08   16.90
   0 -10  -5   38.80    9.40
   0 -10   5   45.80    8.80
   0  10   5   34.80    8.10
   0  10  -5   23.40    6.80
   0  10  -5   33.50    8.50
  -2 -10  -5   -1.30    6.00
   2  10   5   10.60    6.20
  -2  10  -5   -1.30    5.00
  -2  10  -5   -2.40    5.60
  -4 -10  -5   69.79   14.30
  -4  10  -5   43.00    8.70
  -4  10  -5   68.09   11.20
   4  10   5   66.49   10.60
  -6 -10  -5   21.40    9.90
  -6  10  -5   31.80    9.60
  -6  10  -5   31.70    7.80
  -8 -10  -5   71.59   15.30
  -8  10  -5   56.09   11.90
  -8  10  -5   46.90    9.30
 -10 -10  -5   48.70   14.30
 -10  10  -5   33.70   11.10
 -10  10  -5   41.30   10.30
  12 -10   5    3.40    7.40
 -12 -10  -5   18.30   13.60
 -12  10  -5   -2.50    6.40
 -12  10  -5   -2.40    9.10
 -14 -10  -5   15.70   14.30
  14 -10   5   36.50   10.10
 -14  10  -5   22.20    9.50
 -14  10  -5   27.50   12.20
 -16 -10  -5    5.30   14.50
  16 -10   5   15.70    9.40
 -16  10  -5   20.60   12.80
 -16  10  -5   16.00   10.40
 -19 -11   5   15.50   14.10
  19  11  -5   -0.20    6.80
 -19  11   5   -5.30    9.70
 -17 -11   5   86.59   17.50
  17  11  -5   72.39   11.50
 -17  11   5   99.99   16.80
 -15 -11   5   31.20   11.90
 -15  11   5   14.60    9.90
  15  11  -5   27.50    8.10
 -13 -11   5  126.69   18.00
  13  11  -5  156.68   14.90
 -13  11   5  134.09   17.80
 -11 -11   5  261.57   23.90
 -11  11   5  220.68   22.90
  11  11  -5  213.48   17.20
  -9 -11   5   96.19   14.70
  -9  11   5   72.49   13.40
   9  11  -5   78.09   11.50
  -7 -11   5   46.30   10.70
  -7  11   5   41.20   11.10
   7  11  -5   50.19    9.60
  -5 -11   5   13.60    7.80
   5  11  -5   11.90    5.10
  -5  11   5    6.30    9.10
   5  11  -5   13.00    6.50
   3 -11  -5  -12.60    5.80
  -3 -11   5   10.60    7.10
   3  11  -5    7.70    5.00
  -3  11   5    2.10    7.20
   3  11  -5   16.00    7.30
  -1 -11   5   18.90    7.50
   1 -11  -5   12.70    7.60
   1  11  -5   16.80    6.80
  -1  11   5   16.50    7.90
   1  11  -5   19.80    7.30
  -1 -11  -5   25.60    9.00
   1  11   5   29.50    8.70
  -1  11  -5   25.90    8.00
  -1  11  -5   26.30    8.40
  -3 -11  -5   11.20    8.60
  -3  11  -5   18.20    8.20
   3  11   5    8.70    6.90
  -3  11  -5    6.40    5.90
  -5 -11  -5   20.50    9.90
  -5  11  -5   -0.70    5.70
  -5  11  -5    5.10    7.10
  -7 -11  -5   61.39   13.90
  -7  11  -5   65.29   11.30
  -7  11  -5   68.39   12.10
  -9 -11  -5   13.10   10.60
  -9  11  -5   16.90    9.50
  -9  11  -5   23.10    9.00
 -11 -11  -5   21.40   13.10
 -11  11  -5   14.40    8.80
 -11  11  -5    4.20   10.00
 -13 -11  -5   78.29   18.80
 -13  11  -5   70.99   14.10
 -13  11  -5   75.49   16.90
  15 -11   5  151.08   17.50
 -15 -11  -5  112.59   23.70
 -18 -12   5    1.60   11.90
 -18  12   5    9.40   11.20
  18  12  -5   14.30    8.40
 -16 -12   5  187.78   24.40
  16  12  -5  184.68   17.80
 -16  12   5  264.57   28.20
 -14 -12   5  385.66   32.00
 -14  12   5  420.46   31.90
  14  12  -5  342.77   21.70
 -12 -12   5  601.74   36.10
 -12  12   5  621.24   36.30
  12  12  -5  513.25   25.60
 -10 -12   5  293.77   25.40
 -10  12   5  282.17   26.80
  10  12  -5  299.27   20.00
  -8 -12   5    9.10    9.10
  -8  12   5    1.30    8.90
   8  12  -5   21.30    7.80
  -6 -12   5   43.20   11.40
   6  12  -5   50.19   10.10
  -6  12   5   41.70   13.00
  -4 -12   5   95.79   13.50
  -4  12   5   98.49   15.40
   4  12  -5  105.39   13.60
   4  12  -5  145.99   14.90
   2 -12  -5   39.90   18.00
   2  12  -5   63.49    9.80
  -2  12   5   73.19   13.60
   2  12  -5   87.49   12.60
   0 -12  -5  105.29   16.10
   0  12  -5  155.08   15.60
   0  12  -5  121.69   14.40
   0  12   5  101.79   14.00
  -2 -12  -5   39.30   12.30
  -2  12  -5   63.89   11.90
   2  12   5   66.29   11.80
  -2  12  -5   46.30    9.70
  -4 -12  -5    7.90    9.30
  -4  12  -5    3.60    7.70
  -4  12  -5    8.90    7.20
  -6 -12  -5  147.09   21.00
  -6  12  -5  142.69   16.90
  -6  12  -5  117.09   15.70
  -8 -12  -5  215.78   27.00
  -8  12  -5  142.29   18.00
  -8  12  -5  184.38   22.20
 -10 -12  -5  163.48   24.80
 -10  12  -5  178.28   23.30
 -10  12  -5  214.28   23.00
 -12 -12  -5   50.59   16.90
 -12  12  -5   57.69   14.70
 -12  12  -5   79.69   15.10
 -15 -13   5  241.38   29.70
 -15  13   5  251.07   29.20
 -13 -13   5  356.66   32.00
  13  13  -5  290.67   21.10
 -13  13   5  363.56   31.60
 -11 -13   5  329.17   29.30
  11  13  -5  319.37   21.60
 -11  13   5  351.46   31.00
  -9 -13   5  105.39   17.10
   9  13  -5   85.39   13.10
  -9  13   5   76.09   15.00
  -7 -13   5   30.90   11.30
  -7  13   5   48.80   13.30
   7  13  -5   54.69   10.90
  -5 -13   5   51.79   12.10
  -5  13   5   48.20   12.50
   5  13  -5   48.40   10.80
   3  13  -5   18.50    7.10
   3  13  -5   13.30    8.00
  -3  13   5   11.60    9.30
  -1  13   5   -3.10    7.90
   1  13  -5   -5.80    6.30
   1  13  -5    6.10    6.20
  -1 -13  -5   -3.80    9.00
   1  13   5    2.30    7.60
  -1  13  -5    6.20    6.50
  -1  13  -5   -5.90    7.60
  -3 -13  -5   88.49   17.50
  -3  13  -5  110.39   15.10
  -3  13  -5  135.69   17.40
  -5 -13  -5   88.09   18.50
  -5  13  -5   71.59   12.20
  -5  13  -5   79.69   14.70
  -7 -13  -5  301.47   31.60
  -7  13  -5  305.17   25.80
  -7  13  -5  289.07   24.10
  -9 -13  -5   96.79   19.90
  -9  13  -5  108.29   16.40
  -9  13  -5   93.79   15.30
 -10 -14   5   39.70   14.00
 -10  14   5   45.70   14.00
  -8 -14   5   38.20   13.80
   8  14  -5   33.60   10.30
  -8  14   5   42.00   13.80
  -6 -14   5   19.80   10.40
  -6  14   5   33.90   12.20
   6  14  -5   10.60    8.40
  -4  14   5   24.80   10.70
   4  14  -5    3.30    7.90
   2  14  -5   11.30    8.90
  -2  14   5    2.10    8.20
   2  14  -5    7.80    7.00
   0  14   5   29.70   11.00
   0  14  -5   36.50   11.00
   0  14  -5   17.70    8.00
  -2 -14  -5  144.39   20.40
  -2  14  -5  103.89   14.80
  -2  14  -5  120.89   16.30
  -4 -14  -5   87.39   17.90
  -4  14  -5   61.59   12.50
  -4  14  -5   96.79   15.20
  -6 -14  -5  102.19   20.40
  -6  14  -5   82.89   14.90
  -6  14  -5   86.99   15.60
  -3  15   5  251.17   28.00
  28   0  -6  483.15   34.90
  28   0  -6  439.36   23.70
  26   0  -6  183.78   16.00
  24   0  -6   70.69    9.90
  22   0  -6    1.40    4.50
 -20   0   6  153.48   12.50
  20   0  -6  166.18   11.50
 -18   0   6  772.02   25.10
  18   0  -6  735.23   23.10
 -16   0   6  264.07   13.20
  16   0  -6  238.28   11.50
 -16   0   6  234.78   11.10
 -14   0   6  153.58    8.80
  14   0  -6  179.48    9.20
 -14   0   6  173.68   10.20
 -12   0   6  166.28    9.10
  12   0  -6  177.38    8.60
 -12   0   6  192.48    9.70
 -10   0   6 2889.21   58.59
  10   0  -6 2871.11   56.39
 -10   0   6 2677.73   57.09
  -8   0   6 4239.48   86.79
  -8   0   6 4567.54   87.29
   8   0  -6 4629.04   85.09
   6   0  -6 6101.99  110.09
  -6   0   6 5920.51  112.39
  -6   0   6 5735.33  112.99
  -4   0   6 4803.32   95.29
  -4   0   6 4892.61   93.89
   4   0  -6 4962.80   91.49
  -2   0   6  685.43   18.30
   2   0  -6  690.93   16.80
  -2   0   6  678.73   19.90
   0   0   6  507.05   17.10
   0   0   6  538.25   15.50
   0   0  -6  516.45   14.50
  -2   0  -6  321.67   11.70
   2   0   6  328.07   11.90
   2   0   6  322.97   10.00
   2   0   6  352.46   14.20
  -4   0  -6  410.26   14.80
   4   0   6  426.66   14.40
   4   0   6  448.56   16.90
   4   0   6  424.76   12.50
   6   0   6 1050.39   24.70
   6   0   6 1027.20   29.80
  -6   0  -6 1016.10   28.80
   6   0   6 1059.29   27.20
  -6   0  -6 1035.40   27.20
  -6   0  -6 1051.59   31.50
   8   0   6    8.40    3.90
  -8   0  -6   16.20    4.60
  -8   0  -6   16.70    4.80
   8   0   6   13.80    3.30
  -8   0  -6    9.80    3.40
   8   0   6   16.60    3.60
  10   0   6  266.77   11.60
  10   0   6  242.58   14.50
 -10   0  -6  266.67   16.60
 -10   0  -6  259.47   13.10
  10   0   6  261.97   12.90
 -10   0  -6  259.37   15.00
 -12   0  -6  802.12   25.20
  12   0   6  790.02   23.10
 -12   0  -6  725.43   28.20
  12   0   6  751.92   24.70
 -12   0  -6  818.32   31.10
  12   0   6  745.43   27.60
 -14   0  -6  750.32   25.50
 -14   0  -6  745.13   32.00
 -14   0  -6  734.63   30.10
  14   0   6  748.63   23.50
  14   0   6  726.23   28.40
  14   0   6  739.63   25.60
 -16   0  -6  819.12   41.70
 -16   0  -6  815.62   33.90
  16   0   6  828.82   26.50
 -18   0  -6  382.86   25.70
  18   0   6  426.16   19.30
  20   0   6  218.68   15.70
 -20   0  -6  209.58   22.20
  22   0   6   41.20    9.40
 -22   0  -6   41.90   14.10
  27  -1  -6   56.79   10.10
  27   1  -6   73.49   18.10
  27   1  -6   60.69   10.20
  25  -1  -6   92.59   11.50
  25   1  -6  114.39   18.60
  25   1  -6   98.59   11.50
  23  -1  -6   66.39    9.50
  23   1  -6   83.69   15.50
  23   1  -6   73.19    9.50
  21  -1  -6   22.00    5.80
 -21  -1   6   14.10    6.20
  21   1  -6    8.80    8.90
  21   1  -6   11.20    5.20
 -19  -1   6   10.70    5.30
  19  -1  -6   11.90    4.50
  19   1  -6   16.00    5.00
 -19   1   6   15.80    4.40
  19   1  -6   12.80    7.90
 -17  -1   6  451.65   19.70
  17  -1  -6  461.85   16.50
  17   1  -6  459.85   22.10
  17   1  -6  426.76   16.50
 -17   1   6  429.26   16.70
 -17   1   6  483.05   16.80
  15  -1  -6   65.29    6.70
 -15  -1   6   57.79    7.90
  15   1  -6   51.39    6.00
 -15   1   6   45.90    5.70
  15   1  -6   45.60    8.30
 -15   1   6   51.49    6.40
  13  -1  -6  142.39    8.00
 -13  -1   6  132.19    9.90
  13   1  -6  128.99    8.00
 -13   1   6  139.79    8.00
 -13   1   6  130.79    9.00
  13   1  -6  119.69   10.50
  11  -1  -6  591.14   16.10
 -11  -1   6  577.54   16.20
 -11  -1   6  585.94   19.30
 -11   1   6  582.34   16.70
 -11   1   6  553.14   18.00
  11   1  -6  592.24   16.70
  11   1  -6  565.04   19.70
   9  -1  -6 1517.25   31.20
  -9  -1   6 1478.45   34.90
  -9  -1   6 1410.06   32.30
  -9   1   6 1445.56   32.30
   9   1  -6 1447.26   34.90
  -9   1   6 1407.16   33.80
   9   1  -6 1477.45   32.00
  -7  -1   6 1565.94   35.10
  -7  -1   6 1504.05   33.90
   7  -1  -6 1521.75   31.10
   7   1  -6 1512.85   32.50
  -7   1   6 1456.55   34.70
  -7   1   6 1511.35   33.20
  -5  -1   6 3321.17   66.19
   5  -1  -6 3374.66   62.09
  -5  -1   6 3296.87   66.79
   5   1  -6 3287.77   64.39
  -5   1   6 3200.98   66.89
  -5   1   6 3315.67   65.39
   3  -1  -6 1223.18   24.40
  -3  -1   6 1184.38   29.40
  -3  -1   6 1216.18   27.90
  -3   1   6 1177.28   27.70
   3   1  -6 1179.28   27.10
  -3   1   6 1178.58   29.30
   1  -1  -6  105.69    4.80
  -1  -1   6  106.99    6.20
  -1  -1   6   97.89    7.40
  -1   1   6  100.89    6.20
   1   1  -6  100.39    6.20
  -1   1   6  109.79    7.60
   1  -1   6   18.50    3.10
   1  -1   6   16.50    3.60
  -1  -1  -6   17.20    2.60
   1   1   6   13.00    3.20
  -1   1  -6   19.50    3.40
   1   1   6   13.60    2.70
  -3  -1  -6   43.10    4.50
   3  -1   6   33.20    3.90
   3  -1   6   28.00    4.50
   3  -1   6   49.80    5.00
   3   1   6   42.90    5.00
  -3   1  -6   34.50    4.70
  -3   1  -6   29.90    3.90
   3   1   6   24.90    4.20
   3   1   6   45.30    3.60
  -5  -1  -6   17.20    4.70
   5  -1   6   27.70    3.80
  -5  -1  -6   20.70    4.10
   5  -1   6   13.10    3.90
   5  -1   6   16.80    3.40
   5   1   6   17.10    4.40
   5   1   6   15.80    3.40
  -5   1  -6   17.90    3.60
   5   1   6   18.30    2.90
  -5   1  -6   17.30    4.20
  -7  -1  -6   35.80    6.60
  -7  -1  -6   31.90    5.50
   7  -1   6   33.10    4.60
   7  -1   6   48.90    5.40
   7  -1   6   25.50    5.40
   7   1   6   31.30    4.10
  -7   1  -6   32.90    6.00
  -7   1  -6   29.60    4.60
   7   1   6   30.20    4.60
   7   1   6   29.10    5.00
   9  -1   6    5.40    3.00
   9  -1   6    3.70    3.10
  -9  -1  -6    5.50    3.20
  -9  -1  -6   13.40    4.50
   9  -1   6   14.90    5.40
  -9  -1  -6    9.60    5.40
  -9   1  -6   20.60    4.90
   9   1   6    7.60    3.50
  -9   1  -6    8.40    4.40
   9   1   6   -1.00    2.90
  -9   1  -6    2.90    4.30
   9   1   6    7.00    3.70
 -11  -1  -6  229.08   14.40
 -11  -1  -6  212.68   12.20
  11  -1   6  207.78   15.30
 -11  -1  -6  212.78   16.80
  11  -1   6  204.48   11.90
  11  -1   6  210.28   11.40
  11   1   6  202.58   13.60
 -11   1  -6  209.78   15.50
  11   1   6  217.88   12.90
 -11   1  -6  194.18   14.90
 -11   1  -6  192.68   13.00
  11   1   6  207.28   10.60
 -13  -1  -6  355.66   22.70
  13  -1   6  309.77   14.80
  13  -1   6  346.07   19.50
  13  -1   6  310.47   15.20
 -13  -1  -6  341.27   19.10
 -13  -1  -6  322.27   15.70
  13   1   6  318.77   16.70
 -13   1  -6  312.97   19.60
 -13   1  -6  333.47   16.90
 -13   1  -6  338.07   20.60
  13   1   6  301.77   17.50
  13   1   6  316.57   14.10
 -15  -1  -6  405.66   25.70
  15  -1   6  363.46   17.00
  15  -1   6  372.26   21.20
 -15  -1  -6  334.17   21.60
 -15   1  -6  417.46   19.40
  15   1   6  353.56   19.10
  15   1   6  346.97   16.00
 -15   1  -6  398.16   23.90
 -17  -1  -6  248.18   22.90
 -17  -1  -6  207.98   19.90
  17  -1   6  230.68   15.20
  17   1   6  238.48   14.20
  17   1   6  229.18   17.10
 -17   1  -6  258.27   21.40
 -19  -1  -6   81.49   14.80
  19  -1   6   90.59   11.20
 -19   1  -6   98.79   15.20
  19   1   6  122.89   12.50
  21  -1   6   31.70    8.50
 -21  -1  -6   22.20   11.40
  21   1   6   35.90    8.30
  21   1   6   35.40   14.90
 -21   1  -6   38.70   13.50
  28  -2  -6    7.10    8.30
  28   2  -6   10.10   13.60
  28   2  -6    5.60    7.60
  26  -2  -6   14.00    7.50
  26   2  -6   22.00    7.50
  26   2  -6   25.40   12.90
  24  -2  -6   34.40    8.10
  24   2  -6   25.60    7.10
  24   2  -6   35.30   12.50
  22  -2  -6  134.99   12.30
 -22  -2   6  150.18   15.70
  22   2  -6  152.08   19.10
  22   2  -6  136.69   12.30
  20  -2  -6  234.18   13.40
 -20  -2   6  227.98   17.20
  20   2  -6  197.78   18.10
  20   2  -6  215.58   13.30
 -18  -2   6  184.18   14.90
  18  -2  -6  173.88   10.70
  18   2  -6  173.38   11.30
  18   2  -6  160.78   15.30
 -18   2   6  178.88   12.90
 -16  -2   6  217.38   15.10
  16  -2  -6  263.27   11.80
 -16   2   6  258.77   13.80
  16   2  -6  234.08   11.90
 -16   2   6  240.38   10.70
  16   2  -6  255.97   16.60
  14  -2  -6  199.68    9.50
 -14  -2   6  193.68   13.20
  14   2  -6  212.68   13.90
 -14   2   6  192.88    9.20
  14   2  -6  198.98   10.20
 -14   2   6  191.38   12.00
  12  -2  -6  449.06   14.00
 -12  -2   6  460.65   18.90
  12   2  -6  450.85   18.40
  12   2  -6  471.25   15.20
 -12   2   6  443.36   17.30
 -12   2   6  458.75   14.00
  10  -2  -6  198.18    7.90
 -10  -2   6  200.28    8.60
 -10  -2   6  193.28   11.20
  10   2  -6  187.98    8.60
 -10   2   6  193.98    8.20
 -10   2   6  160.68   10.40
   8  -2  -6    6.70    1.80
  -8  -2   6    9.10    3.00
  -8  -2   6    9.60    2.60
  -8   2   6    6.90    2.90
  -8   2   6   10.10    2.50
  -6  -2   6   10.30    2.80
  -6  -2   6   11.90    3.00
   6  -2  -6   16.90    2.10
  -6   2   6   11.40    3.10
   6   2  -6   18.60    3.20
  -6   2   6   12.80    2.50
  -4  -2   6  348.27   13.10
  -4  -2   6  368.26   12.60
  -4   2   6  352.86   13.30
   4   2  -6  339.37   12.00
  -4   2   6  344.07   11.60
  -2  -2   6  113.29    7.90
  -2  -2   6  112.79    6.60
  -2   2   6  110.19    7.50
   2   2  -6  108.99    6.80
  -2   2   6  109.69    6.50
   0  -2   6  358.06   12.10
   0  -2   6  356.26   14.40
   0   2  -6  349.87   12.30
   0   2  -6  370.46   13.50
   0   2   6  349.57   13.70
   0   2   6  363.46   12.60
  -2  -2  -6  163.18    6.50
   2  -2   6  149.88    7.70
   2  -2   6  150.98    8.10
   2  -2   6  153.28   10.10
  -2   2  -6  162.28    8.70
  -2   2  -6  151.28    9.20
   2   2   6  161.88    9.50
   2   2   6  165.48    8.90
  -4  -2  -6 1005.70   24.30
   4  -2   6  962.00   24.40
   4  -2   6  988.50   24.90
  -4  -2  -6  976.50   30.50
   4  -2   6  989.20   29.20
   4   2   6  971.80   27.40
   4   2   6  900.31   25.90
  -4   2  -6  976.30   28.00
   4   2   6  976.70   25.90
   4   2   6  982.60   21.30
  -4   2  -6  986.00   26.30
  -6  -2  -6  855.71   23.00
   6  -2   6  806.82   21.80
   6  -2   6  796.22   22.00
  -6  -2  -6  803.62   28.50
   6  -2   6  762.42   26.40
   6   2   6  796.72   19.20
   6   2   6  703.83   24.90
  -6   2  -6  812.22   23.90
  -6   2  -6  755.22   25.40
   6   2   6  803.12   23.70
   6   2   6  824.52   25.10
  -8  -2  -6  539.65   18.70
   8  -2   6  493.05   16.40
   8  -2   6  470.55   21.10
   8  -2   6  476.45   16.40
  -8  -2  -6  491.05   23.00
   8   2   6  512.25   19.40
   8   2   6  462.15   14.40
   8   2   6  513.45   18.70
   8   2   6  475.15   20.80
  -8   2  -6  489.55   18.60
  -8   2  -6  457.65   20.50
 -10  -2  -6  129.69    9.70
  10  -2   6  107.89    9.20
 -10  -2  -6  131.59   14.60
  10  -2   6   86.79   10.70
  10  -2   6  134.19    8.90
  10   2   6  134.49   10.90
  10   2   6  138.29   11.40
 -10   2  -6  118.79   11.80
 -10   2  -6  108.19   11.10
 -10   2  -6  124.19   13.10
  10   2   6  118.99    8.30
  10   2   6  140.49   13.60
  12  -2   6   53.89    9.10
 -12  -2  -6   56.89   11.10
 -12  -2  -6   58.89    6.80
  12  -2   6   67.59    7.30
  12  -2   6   61.49    7.50
  12   2   6   56.49    7.70
 -12   2  -6   68.49    8.80
 -12   2  -6   59.39   10.20
  12   2   6   54.39    6.70
  12   2   6   54.79    8.20
 -12   2  -6   60.69    8.90
  12   2   6   82.29   11.90
 -14  -2  -6   63.89   12.80
  14  -2   6   69.69   10.90
  14  -2   6   89.79   10.00
  14   2   6   70.89    8.20
  14   2   6   67.39    9.90
 -14   2  -6   92.79   12.00
 -14   2  -6   98.39   13.50
  14   2   6   97.09   14.80
  16  -2   6   36.50    8.80
 -16  -2  -6   56.89   11.90
  16  -2   6   55.49    8.60
  16   2   6   59.59    9.70
 -16   2  -6   36.40    7.20
  16   2   6   65.99   14.80
  16   2   6   34.30    6.90
 -16   2  -6   54.79   12.40
  18  -2   6   11.00    6.20
 -18  -2  -6   -1.90    8.00
 -18  -2  -6   16.20   10.20
  18   2   6  -12.30   10.90
 -18   2  -6    3.90    8.30
  18   2   6    7.70    6.10
  20  -2   6   21.80    8.10
 -20  -2  -6    1.80    9.20
  20   2   6   29.80    7.90
  20   2   6   40.60   15.60
 -20   2  -6   27.70   12.60
  22  -2   6    3.10    8.00
 -22  -2  -6   14.30   11.80
  22   2   6    1.90    9.20
  22   2   6   20.70   15.30
 -22   2  -6   17.60   13.40
  27  -3  -6   21.20    8.30
  27   3  -6   13.80   12.10
  27   3  -6   16.40    8.00
  25  -3  -6    8.50    6.40
 -25  -3   6   12.40   11.70
  25   3  -6    7.20    6.00
  25   3  -6    8.10   10.40
 -23  -3   6   50.89   10.90
  23  -3  -6   60.19    9.00
  23   3  -6   66.89   14.60
  23   3  -6   46.40    8.30
  21  -3  -6  533.25   20.50
 -21  -3   6  538.95   27.70
  21   3  -6  513.55   20.90
  21   3  -6  519.55   27.70
 -19  -3   6  810.22   32.90
  19  -3  -6  836.82   25.30
  19   3  -6  837.22   26.20
  19   3  -6  835.42   33.00
 -19   3   6  825.52   29.60
  17  -3  -6  823.72   23.70
 -17  -3   6  797.52   31.00
 -17   3   6  776.92   27.70
  17   3  -6  779.62   24.10
 -15  -3   6  795.52   29.50
  15  -3  -6  768.92   21.70
  15   3  -6  750.22   22.60
 -15   3   6  775.82   19.70
 -15   3   6  746.13   26.20
 -13  -3   6   83.49    9.80
  13  -3  -6   84.79    6.40
 -13   3   6   78.59    5.90
 -13   3   6   79.49    9.60
  13   3  -6   85.09    7.20
  11  -3  -6    8.80    2.60
 -11  -3   6   12.60    4.40
  11   3  -6   11.40    3.00
 -11   3   6    8.00    2.60
 -11   3   6    9.40    4.20
  -9  -3   6   93.19    8.60
  -9  -3   6   80.69    6.40
   9  -3  -6   87.09    5.00
   9   3  -6   84.09    6.60
  -9   3   6   85.69    8.40
  -9   3   6   98.99    5.70
  -7  -3   6  314.07   12.10
   7  -3  -6  324.17    8.90
  -7  -3   6  323.57   14.30
  -7   3   6  307.77   13.90
  -7   3   6  326.57   10.70
   7   3  -6  301.37   10.10
   7   3  -6  316.17   12.10
  -5  -3   6 2657.83   57.29
   5  -3  -6 2649.83   49.30
  -5  -3   6 2650.63   55.99
   5   3  -6 2625.44   55.49
   5   3  -6 2551.84   53.19
  -5   3   6 2666.03   57.89
  -5   3   6 2675.63   53.59
  -3  -3   6   94.89    7.60
  -3  -3   6  110.49    7.30
   3   3  -6   98.79    6.20
   3   3  -6  106.49    7.30
  -3   3   6  117.29    6.60
  -3   3   6  101.69    8.00
  -1  -3   6    5.60    2.80
  -1  -3   6    7.30    2.40
  -1   3   6    5.40    2.70
   1   3  -6    4.50    2.00
   1   3  -6    8.20    2.90
  -1   3   6    6.10    2.40
   1  -3   6  555.14   20.00
  -1  -3  -6  560.94   20.80
   1  -3   6  556.24   16.50
   1   3   6  560.44   17.50
   1   3   6  557.04   18.60
  -1   3  -6  567.24   17.60
  -1   3  -6  544.25   19.00
   3  -3   6 2349.17   55.89
   3  -3   6 2401.26   49.99
   3  -3   6 2356.36   50.89
  -3  -3  -6 2355.56   57.39
   3   3   6 2393.86   53.29
   3   3   6 2368.16   51.99
  -3   3  -6 2338.27   51.99
  -3   3  -6 2339.87   54.39
  -5  -3  -6 2091.29   54.69
   5  -3   6 2092.69   45.50
   5  -3   6 2087.69   52.49
  -5  -3  -6 2134.69   45.00
   5  -3   6 2114.29   46.50
   5   3   6 2128.09   48.70
   5   3   6 2147.39   49.50
  -5   3  -6 2008.60   50.59
   5   3   6 2093.89   41.50
  -5   3  -6 2113.79   48.50
   7  -3   6 1274.87   38.10
   7  -3   6 1271.57   32.10
   7  -3   6 1291.77   31.20
  -7  -3  -6 1279.37   40.50
  -7   3  -6 1227.68   36.80
   7   3   6 1259.67   35.30
  -7   3  -6 1278.07   34.30
   7   3   6 1323.27   34.70
   7   3   6 1254.47   28.00
   7   3   6 1315.97   35.00
   9  -3   6  545.65   18.80
   9  -3   6  550.74   24.10
  -9  -3  -6  552.24   26.50
   9  -3   6  563.04   17.70
  -9   3  -6  554.44   21.10
   9   3   6  545.65   21.20
   9   3   6  528.65   23.20
  -9   3  -6  511.85   23.50
   9   3   6  558.04   21.30
   9   3   6  552.44   15.90
 -11  -3  -6   -4.30    3.30
  11  -3   6   -0.50    2.60
  11  -3   6    1.80    4.70
  11  -3   6   -2.50    3.80
 -11  -3  -6   -0.40    6.30
 -11   3  -6    0.80    5.90
  11   3   6   -1.10    5.70
  11   3   6   -0.80    4.30
  11   3   6   -1.50    3.90
 -11   3  -6    0.80    4.00
 -11   3  -6    5.50    4.00
  11   3   6    0.90    2.80
  13  -3   6   32.90    6.50
  13  -3   6   24.20    7.60
 -13  -3  -6   32.10   10.30
 -13   3  -6   23.20    6.60
  13   3   6   24.90    7.20
 -13   3  -6   35.50    9.20
  13   3   6   30.80   10.00
  13   3   6   34.80    5.80
 -15  -3  -6   17.90    9.80
  15  -3   6   24.40    6.40
  15   3   6   17.50    5.20
 -15   3  -6   16.00    6.20
 -15   3  -6   28.10    9.70
  15   3   6   21.60    7.10
  15   3   6   22.10   10.80
 -17  -3  -6    7.30    9.20
  17  -3   6   13.00    6.60
 -17   3  -6    4.70    8.80
 -17   3  -6    0.20    5.10
  17   3   6    6.30    5.30
  17   3   6   -0.30   10.30
  19  -3   6    2.50    6.90
 -19  -3  -6   13.20   10.70
 -19   3  -6    6.80   10.50
  19   3   6   -8.90   10.50
  21  -3   6   -0.40    6.70
  21   3   6    4.40   13.10
 -21   3  -6   -5.50   10.60
 -26  -4   6   32.40   12.10
  26  -4  -6   34.40    9.10
  26   4  -6   42.90    9.10
 -24  -4   6   -8.60    8.00
  24  -4  -6   -0.30    5.60
  24   4  -6   -4.20    5.10
 -22  -4   6   87.59   14.00
  22  -4  -6  106.69   11.40
  22   4  -6  105.29   11.60
  20  -4  -6  412.36   17.50
 -20  -4   6  403.46   25.10
 -20   4   6  390.36   22.50
  20   4  -6  395.56   18.20
 -18  -4   6  773.52   32.60
  18  -4  -6  744.83   23.20
 -18   4   6  776.22   30.30
  18   4  -6  730.13   24.30
 -16  -4   6  710.43   29.70
  16  -4  -6  691.53   20.70
 -16   4   6  635.24   26.60
  16   4  -6  697.83   22.20
  14  -4  -6  358.16   13.00
 -14  -4   6  340.77   19.50
  14   4  -6  347.57   14.40
 -14   4   6  363.26   18.90
  12  -4  -6    5.20    2.40
 -12  -4   6    6.30    4.20
 -12   4   6    4.90    4.20
 -12   4   6    4.70    2.00
  12   4  -6    4.60    3.10
  10  -4  -6   94.49    5.60
 -10  -4   6   85.59    9.50
 -10   4   6   96.09    9.60
  10   4  -6   91.89    7.50
 -10   4   6   97.79    5.70
  -8  -4   6 2282.77   55.29
   8  -4  -6 2289.17   44.90
  -8  -4   6 2257.97   48.80
  -8   4   6 2267.77   53.89
  -8   4   6 2346.97   46.90
   8   4  -6 2305.07   50.19
   8   4  -6 2217.68   46.30
  -6  -4   6  803.12   23.00
   6  -4  -6  794.32   17.30
  -6  -4   6  837.52   25.90
   6   4  -6  784.22   20.40
  -6   4   6  786.12   25.00
   6   4  -6  812.52   23.40
  -6   4   6  818.32   20.60
  -4  -4   6 2134.29   49.30
  -4  -4   6 2145.89   49.20
   4   4  -6 2137.99   45.90
  -4   4   6 2198.98   50.49
  -4   4   6 2181.68   45.80
   4   4  -6 2105.89   48.30
  -2  -4   6   23.80    4.70
  -2  -4   6   22.20    4.20
   2  -4  -6   23.10    4.80
   2   4  -6   23.00    4.40
  -2   4   6   31.00    4.10
   2   4  -6   22.00    3.50
  -2   4   6   27.80    5.10
   0  -4  -6  327.87   15.70
   0  -4   6  332.57   15.90
   0  -4   6  335.37   12.60
   0   4  -6  329.17   14.60
   0   4   6  343.27   12.90
   0   4  -6  308.77   12.90
   0   4   6  309.17   13.90
   2  -4   6 1200.88   35.00
   2  -4   6 1227.58   29.30
  -2  -4  -6 1225.78   36.20
   2   4   6 1177.68   30.90
   2   4   6 1187.88   31.70
  -2   4  -6 1201.28   33.50
  -2   4  -6 1219.88   31.50
   4  -4   6 1525.55   37.10
  -4  -4  -6 1593.84   44.50
   4  -4   6 1555.34   42.70
   4  -4   6 1519.05   34.90
   4   4   6 1516.05   38.60
  -4   4  -6 1506.75   38.30
   4   4   6 1471.95   37.90
  -4   4  -6 1505.45   40.80
   6  -4   6 1064.69   26.70
   6  -4   6 1076.29   28.60
   6  -4   6 1074.09   34.40
  -6  -4  -6 1105.19   37.10
  -6   4  -6 1078.39   33.30
   6   4   6 1056.29   23.10
   6   4   6 1016.40   30.50
  -6   4  -6 1059.79   30.80
   6   4   6 1034.10   30.40
   8  -4   6  415.76   16.50
  -8  -4  -6  413.76   23.70
   8  -4   6  425.46   21.50
   8  -4   6  419.26   14.70
  -8   4  -6  437.96   18.50
   8   4   6  426.56   12.70
   8   4   6  422.16   18.70
   8   4   6  402.66   18.50
  -8   4  -6  423.16   20.50
 -10  -4  -6   -8.90    5.20
  10  -4   6    3.40    3.90
  10  -4   6    4.20    5.50
  10   4   6    7.70    3.20
  10   4   6   -0.30    4.10
 -10   4  -6   -1.90    4.30
 -10   4  -6    7.70    4.40
  10   4   6   -1.60    4.20
 -10   4  -6    3.80    5.90
  12  -4   6  230.38   18.50
 -12  -4  -6  202.98   20.90
  12  -4   6  207.88   13.30
 -12   4  -6  202.48   17.80
 -12   4  -6  238.18   16.20
  12   4   6  205.68   10.60
  12   4   6  211.88   16.10
  14  -4   6   37.90    7.30
 -14   4  -6   52.49   11.10
 -14   4  -6   45.50    8.90
  14   4   6   55.99    7.50
  14   4   6   50.39    9.10
  16  -4   6   16.20    6.40
 -16  -4  -6   20.50   10.40
 -16   4  -6   25.60   10.30
 -16   4  -6    8.40    6.00
  16   4   6    3.50    9.90
  18  -4   6   25.90    7.60
 -18  -4  -6   42.80   14.00
 -18   4  -6    2.40    7.00
 -18   4  -6   18.80   10.30
  18   4   6   26.00   12.50
  20  -4   6   -0.60    7.00
 -20  -4  -6    9.30   11.30
 -20   4  -6    7.40   11.50
  27  -5  -6   12.50    8.00
 -27  -5   6    2.00   10.40
  27   5  -6    5.40    6.70
  25  -5  -6   18.00    7.60
 -25  -5   6    7.50   10.30
  25   5  -6   20.70    7.10
 -23  -5   6   21.90   10.60
  23  -5  -6   13.90    6.60
  23   5  -6   10.40    6.40
 -21  -5   6   10.60    8.50
  21  -5  -6    3.40    5.40
  21   5  -6    8.80    5.60
 -21   5   6    5.80    7.00
 -19  -5   6   23.30    8.90
  19  -5  -6   24.30    5.80
  19   5  -6   10.80    5.10
 -19   5   6   11.00    7.20
  17  -5  -6   74.39    8.00
 -17  -5   6   85.39   12.30
 -17   5   6   56.39    9.70
  17   5  -6   82.29    9.20
 -15  -5   6   23.90    7.00
  15  -5  -6   23.80    4.50
 -15   5   6    4.10    5.80
  15   5  -6   23.90    5.20
  13  -5  -6   50.89    5.40
 -13  -5   6   48.80    8.80
 -13   5   6   48.40    8.50
  13   5  -6   53.49    6.40
 -11  -5   6   97.09   11.20
  11  -5  -6   84.79    6.00
 -11   5   6   84.49   11.20
  11   5  -6   78.59    8.00
   9  -5  -6   13.10    2.70
  -9  -5   6    9.30    4.40
  -9  -5   6   10.40    3.10
   9   5  -6    9.80    2.40
  -9   5   6   14.10    4.50
   9   5  -6   14.20    4.10
  -9   5   6   12.00    2.60
  -7  -5   6  440.66   16.40
  -7  -5   6  454.35   19.90
   7  -5  -6  466.35   11.90
  -7   5   6  463.75   14.10
   7   5  -6  474.65   17.40
  -7   5   6  464.95   19.60
   7   5  -6  441.76   14.20
  -5  -5   6    6.30    3.60
   5  -5  -6    4.30    3.00
  -5  -5   6    5.10    3.40
   5   5  -6   10.70    3.90
   5   5  -6    7.60    2.70
  -5   5   6   10.90    2.60
  -5   5   6    8.30    3.80
  -3  -5   6    2.40    3.40
   3  -5  -6    6.40    3.50
  -3  -5   6   -1.50    3.50
   3   5  -6    7.70    3.00
   3   5  -6    5.00    3.50
  -3   5   6    8.90    3.10
  -3   5   6    4.90    4.00
  -1  -5   6    5.40    4.00
   1  -5  -6    4.20    4.40
  -1  -5   6   -0.10    2.90
   1   5  -6    5.00    3.00
  -1   5   6    4.00    3.10
  -1   5   6   15.00    4.50
   1   5  -6    8.60    4.10
   1  -5   6   45.40    5.50
  -1  -5  -6   41.10    7.50
   1  -5   6   40.40    7.00
  -1   5  -6   40.90    5.40
   1   5   6   32.70    5.40
  -1   5  -6   56.39    7.60
   1   5   6   54.29    6.80
   3  -5   6  186.68    9.60
   3  -5   6  192.78   14.10
  -3  -5  -6  198.58   14.90
  -3   5  -6  191.98   11.50
   3   5   6  193.28   11.60
   3   5   6  182.48   11.30
  -3   5  -6  189.68   12.90
  -5  -5  -6   50.89    9.10
   5  -5   6   69.49    6.40
   5  -5   6   41.00    7.40
   5  -5   6   74.79    8.30
   5   5   6   69.89    8.60
   5   5   6   65.79    8.40
  -5   5  -6   67.09    8.00
  -5   5  -6   65.19    9.20
   7  -5   6   34.70    5.70
   7  -5   6   31.00    8.30
  -7  -5  -6   32.50    8.50
   7  -5   6   38.00    4.70
  -7   5  -6   49.90    8.80
  -7   5  -6   34.00    6.20
   7   5   6   36.60    6.80
   7   5   6   33.10    6.10
   7   5   6   54.99    4.40
   9  -5   6    4.40    4.40
   9  -5   6   -1.10    5.10
  -9  -5  -6   -5.60    6.20
   9   5   6   -1.40    4.70
  -9   5  -6   12.90    6.10
   9   5   6    5.10    4.40
  -9   5  -6    3.20    4.40
  11  -5   6  376.46   17.50
 -11  -5  -6  360.06   26.90
 -11   5  -6  385.86   22.50
 -11   5  -6  361.46   20.00
  11   5   6  336.57   20.10
 -13  -5  -6   -5.20    8.10
  13  -5   6   -5.30    4.70
 -13   5  -6    2.70    5.30
  13   5   6   -9.80    5.40
 -13   5  -6    3.00    7.90
  15  -5   6    9.70    5.60
 -15  -5  -6    9.10   10.10
 -15   5  -6   19.20    9.10
 -15   5  -6    1.40    5.50
  17  -5   6    5.30    6.50
 -17  -5  -6   10.90   10.60
 -17   5  -6    1.90    9.30
 -17   5  -6   -1.60    5.90
 -19  -5  -6   13.90   12.20
  19  -5   6    4.30    6.90
 -19   5  -6   -6.30    6.50
 -19   5  -6    5.20   11.80
  26  -6  -6    0.40    6.90
 -26  -6   6   -9.60   10.20
  26   6  -6   13.20    7.50
  24  -6  -6   31.90    8.40
 -24  -6   6   18.20   11.30
  24   6  -6   39.30    8.60
 -22  -6   6   45.50   13.30
  22  -6  -6   37.30    7.90
  22   6  -6   36.50    8.00
 -22   6   6   41.20   10.90
 -20  -6   6  128.09   17.50
  20  -6  -6  167.68   12.50
  20   6  -6  142.69   12.80
 -20   6   6  184.08   19.40
  18  -6  -6  368.36   15.90
 -18  -6   6  365.56   25.60
  18   6  -6  339.77   17.30
 -18   6   6  367.36   23.40
 -16  -6   6  253.47   20.80
  16  -6  -6  264.37   12.40
  16   6  -6  254.57   14.60
 -16   6   6  290.87   20.50
 -14  -6   6   48.80    9.40
  14  -6  -6   57.09    6.40
 -14   6   6   46.10    9.00
  14   6  -6   58.49    7.30
 -12  -6   6   25.60    7.50
  12  -6  -6   19.60    3.80
  12   6  -6   31.50    5.80
 -12   6   6   27.20    7.20
  10  -6  -6  111.29    7.70
  10  -6  -6  113.59    6.50
 -10  -6   6  115.49   12.70
 -10   6   6  115.79    8.70
  10   6  -6  118.89    9.80
  10   6  -6  113.89    6.90
 -10   6   6   86.19   10.30
 -10   6   6  120.79    6.30
   8  -6  -6  187.88   10.30
  -8  -6   6  182.38   14.10
   8  -6  -6  169.28    7.20
   8   6  -6  173.08    8.90
  -8   6   6  171.58    8.20
  -8   6   6  178.38   13.90
  -8   6   6  167.88    9.20
   8   6  -6  171.58   11.00
  -6  -6   6   83.29    9.60
   6  -6  -6   85.69    8.10
  -6  -6   6   82.99    8.50
   6  -6  -6   90.89    4.50
  -6   6   6   90.29    6.40
  -6   6   6   99.89   10.30
   6   6  -6   80.19    8.30
  -6   6   6   94.69    5.90
   6   6  -6   75.89    6.60
  -4  -6   6  571.94   22.10
  -4  -6   6  586.64   21.80
   4  -6  -6  583.84   21.50
  -4   6   6  563.14   22.50
   4   6  -6  567.24   18.70
  -4   6   6  569.24   17.80
   4   6  -6  571.64   20.80
  -2  -6   6   22.70    5.80
   2  -6  -6   33.90    6.50
  -2  -6   6   21.60    5.00
  -2   6   6   33.10    5.10
   2   6  -6   32.10    6.10
  -2   6   6   22.00    6.10
   2   6  -6   33.30    5.20
   0  -6   6   40.80    7.00
   0  -6  -6   38.90    7.30
   0  -6   6   56.19    7.00
   0   6   6   43.80    6.00
   0   6  -6   51.49    6.60
   0   6  -6   46.10    6.90
   0   6   6   44.70    6.80
  -2  -6  -6  183.18   15.20
   2  -6   6  182.68   14.60
   2  -6   6  210.88   10.90
  -2   6  -6  207.28   12.70
  -2   6  -6  211.88   14.00
   2   6   6  203.48   12.30
   2   6   6  181.68   12.40
  -4  -6  -6  341.87   20.70
   4  -6   6  346.47   19.60
   4  -6   6  343.37   13.70
   4   6   6  347.37   16.60
  -4   6  -6  353.66   18.30
  -4   6  -6  349.47   17.00
   4   6   6  336.27   15.90
   6  -6   6  525.85   17.30
   6  -6   6  510.85   24.80
   6  -6   6  516.55   20.20
  -6  -6  -6  516.75   26.80
   6   6   6  535.85   21.70
  -6   6  -6  534.15   22.10
   6   6   6  518.55   20.00
  -6   6  -6  498.65   23.20
  -8  -6  -6  362.36   24.20
   8  -6   6  379.36   17.50
   8   6   6  373.06   19.30
   8   6   6  388.96   17.60
  -8   6  -6  386.96   19.90
  -8   6  -6  387.16   21.30
 -10  -6  -6   20.00   10.60
  10  -6   6   35.80    7.20
 -10   6  -6   22.70    7.40
 -10   6  -6   27.60    8.40
  10   6   6   24.70    7.90
 -12  -6  -6   28.20   11.10
  12  -6   6   12.70    5.90
 -12   6  -6    3.50    7.90
 -12   6  -6    0.40    5.10
  12   6   6   15.30    6.90
 -14  -6  -6   68.69   16.40
  14  -6   6   92.59   11.30
 -14   6  -6  117.99   15.50
 -14   6  -6  103.59   15.50
 -16  -6  -6    4.90   11.30
  16  -6   6   20.90    8.10
 -16   6  -6   20.60    8.30
 -16   6  -6   13.70   11.10
 -18  -6  -6   20.80   13.80
  18  -6   6    9.40    7.80
 -18   6  -6   14.00    7.80
 -18   6  -6   -2.00   10.40
  20  -6   6  -10.80    7.80
 -20  -6  -6   -1.70   13.50
 -20   6  -6   -6.80   12.10
 -20   6  -6    1.40    7.50
 -25  -7   6   -6.30    9.70
  25  -7  -6   12.60    7.00
  25   7  -6   -3.00    5.90
 -25   7   6   -1.80    8.90
 -23  -7   6   30.90   12.40
  23  -7  -6   43.50    8.20
 -23   7   6   53.29   11.90
  23   7  -6   46.70    8.90
 -23   7   6   29.30   10.90
 -21  -7   6  229.38   25.10
  21  -7  -6  273.07   15.90
 -21   7   6  254.57   20.10
  21   7  -6  256.37   16.50
 -21   7   6  275.37   23.50
  19  -7  -6  503.75   19.50
 -19  -7   6  473.35   31.60
 -19   7   6  519.65   29.50
 -19   7   6  455.25   24.40
  19   7  -6  468.85   21.20
 -17  -7   6  611.54   33.60
  17  -7  -6  630.24   20.90
  17   7  -6  584.04   23.50
 -17   7   6  640.34   31.50
 -17   7   6  604.34   26.40
  15  -7  -6  234.08   11.70
 -15  -7   6  231.38   20.80
 -15   7   6  251.07   16.10
  15   7  -6  195.88   14.00
 -15   7   6  213.88   19.70
  13  -7  -6   14.40    3.70
 -13  -7   6    7.10    6.10
 -13   7   6   10.20    5.00
 -13   7   6   13.00    7.70
  13   7  -6   10.60    5.40
 -11  -7   6    5.80    6.00
  11  -7  -6    6.60    3.00
 -11   7   6    2.40    5.20
  11   7  -6    8.70    4.50
 -11   7   6   13.00    4.50
  -9  -7   6  228.98   17.50
   9  -7  -6  234.18    9.30
   9  -7  -6  228.58   11.90
   9   7  -6  225.28   13.60
  -9   7   6  230.08   11.90
  -9   7   6  246.18    9.90
  -9   7   6  249.48   17.80
   9   7  -6  223.98   11.20
  -7  -7   6  695.13   28.30
   7  -7  -6  713.33   17.60
   7  -7  -6  707.63   23.60
   7   7  -6  715.43   24.70
   7   7  -6  694.23   21.50
  -7   7   6  704.13   20.00
  -7   7   6  692.63   27.80
  -7   7   6  686.33   19.90
   5  -7  -6  698.83   24.60
  -5  -7   6  670.53   26.50
   5   7  -6  675.83   24.20
  -5   7   6  714.13   20.90
   5   7  -6  705.13   22.30
  -5   7   6  708.63   27.30
   3  -7  -6  283.87   15.90
  -3  -7   6  251.07   15.10
   3   7  -6  301.17   15.60
   3   7  -6  290.77   13.80
  -3   7   6  274.07   12.70
  -3   7   6  283.07   16.70
   1  -7  -6    8.40    4.90
  -1  -7   6    8.70    3.70
  -1   7   6    9.00    4.00
  -1   7   6    4.60    4.40
   1   7  -6   10.00    3.90
   1   7  -6    0.80    4.00
  -1  -7  -6  535.65   24.80
   1  -7   6  558.04   19.90
  -1   7  -6  530.05   21.10
  -1   7  -6  500.95   22.00
   1   7   6  494.75   21.40
   1   7   6  537.65   20.20
  -3  -7  -6 1119.59   40.10
   3  -7   6 1133.79   30.20
   3   7   6 1167.48   34.10
  -3   7  -6 1160.18   35.00
   3   7   6 1129.39   34.10
  -3   7  -6 1123.29   36.20
   5  -7   6 1204.78   33.30
  -5  -7  -6 1156.38   42.70
   5   7   6 1131.09   33.90
  -5   7  -6 1156.08   37.70
  -5   7  -6 1148.59   36.30
   5   7   6 1171.78   35.80
   7  -7   6  629.74   23.80
  -7  -7  -6  630.34   32.30
  -7   7  -6  615.74   25.90
   7   7   6  591.64   23.10
   7   7   6  582.54   25.20
  -7   7  -6  628.14   27.60
  -9  -7  -6  378.46   28.20
   9  -7   6  453.85   20.50
  -9   7  -6  439.76   23.00
   9   7   6  380.56   22.00
  -9   7  -6  387.86   23.40
 -11  -7  -6   96.89   17.40
  11  -7   6  115.89   12.40
 -11   7  -6   99.79   14.70
 -11   7  -6   81.79   12.00
  11   7   6   98.09   13.10
  13  -7   6   -5.10    5.00
 -13  -7  -6   -0.10    9.60
 -13   7  -6   -6.40    7.60
 -13   7  -6   -3.30    5.70
 -15  -7  -6   46.20   15.40
  15  -7   6   42.40    9.60
 -15   7  -6   56.39   13.40
 -15   7  -6   48.60   10.70
  17  -7   6   14.10    8.90
 -17  -7  -6    6.70   12.10
 -17   7  -6   19.00   11.40
 -17   7  -6   25.50    9.00
  19  -7   6   -6.50    7.50
 -19  -7  -6   -3.80   14.20
 -19   7  -6   -8.30   10.00
 -19   7  -6    9.40    7.20
  24  -8  -6   -7.10    5.50
 -24  -8   6    5.30   11.20
 -24   8   6    0.60    9.00
 -24   8   6  -23.00    8.20
  24   8  -6    6.40    6.70
  22  -8  -6   76.59    9.80
 -22  -8   6   69.09   16.30
 -22   8   6   74.09   13.30
  22   8  -6   75.79   11.00
 -22   8   6   67.79   13.70
 -20  -8   6  165.48   22.20
  20  -8  -6  193.18   13.50
 -20   8   6  185.48   18.20
 -20   8   6  184.78   21.70
  20   8  -6  203.78   15.40
  18  -8  -6  263.77   14.40
 -18  -8   6  269.27   25.80
  18   8  -6  258.17   16.50
 -18   8   6  253.47   23.80
 -18   8   6  263.87   19.40
 -16  -8   6  245.78   23.70
  16  -8  -6  251.47   13.30
  16   8  -6  250.17   16.40
 -16   8   6  247.28   17.90
 -16   8   6  252.37   22.60
 -14  -8   6  257.97   22.90
  14  -8  -6  227.98   12.10
 -14   8   6  244.88   16.50
 -14   8   6  249.88   22.20
  14   8  -6  243.78   16.00
  12  -8  -6    9.60    4.00
 -12  -8   6   17.90    9.10
 -12   8   6   15.10    7.30
 -12   8   6   11.50    6.10
  12   8  -6    4.70    5.60
 -10  -8   6  171.48   16.90
  10  -8  -6  152.08    8.50
 -10   8   6  154.78   11.10
 -10   8   6  178.38   17.00
  10   8  -6  159.48   13.30
   8  -8  -6  129.29    7.20
  -8  -8   6  138.49   14.90
   8  -8  -6  148.99   11.00
  -8   8   6  128.19   15.30
  -8   8   6  130.19    8.40
  -8   8   6  151.38   12.10
   8   8  -6  129.49    9.80
   8   8  -6  138.89   12.10
   6  -8  -6   32.40    6.60
  -6  -8   6   31.80    7.60
  -6   8   6   25.20    6.80
   6   8  -6   34.00    7.10
  -6   8   6   25.40    4.70
   6   8  -6   30.90    5.50
  -4  -8   6   54.99    8.60
   4  -8  -6   51.19    8.30
  -4   8   6   68.59    7.60
  -4   8   6   54.09    8.60
   4   8  -6   64.09    8.20
   4   8  -6   54.89    8.20
   2  -8  -6  100.19   12.00
  -2  -8   6  153.28   12.30
   2   8  -6  119.09   11.80
  -2   8   6  119.09   10.00
   2   8  -6  123.19   10.70
  -2   8   6  117.89   12.40
   0  -8   6  151.78   11.80
   0  -8  -6  146.99   14.40
   0   8   6  153.98   13.70
   0   8  -6  151.88   13.50
   0   8   6  171.18   12.00
   0   8  -6  140.69   11.90
  -2  -8  -6  605.04   28.60
   2  -8   6  624.24   21.90
   2   8   6  555.94   23.80
   2   8   6  566.94   22.90
  -2   8  -6  582.54   24.00
  -2   8  -6  563.94   24.80
  -4  -8  -6 1149.58   43.10
  -4   8  -6 1126.39   36.70
   4   8   6 1124.49   35.40
  -4   8  -6 1134.09   38.00
   4   8   6 1101.79   35.40
  -6  -8  -6  393.06   27.30
  -6   8  -6  384.26   21.70
  -6   8  -6  372.16   22.80
   6   8   6  368.46   19.10
   6   8   6  372.96   21.10
   8  -8   6  503.05   22.60
  -8  -8  -6  456.85   31.10
   8   8   6  467.15   24.70
  -8   8  -6  526.75   25.90
  -8   8  -6  461.75   26.00
  10  -8   6    5.10    6.70
 -10  -8  -6    9.30   10.30
 -10   8  -6    5.90    6.50
 -10   8  -6    6.00    9.00
  12  -8   6    3.70    6.70
 -12  -8  -6   10.30   11.00
 -12   8  -6    7.20    8.70
 -12   8  -6   -2.40    6.30
 -14  -8  -6    9.50   11.50
  14  -8   6    4.50    6.90
 -14   8  -6   12.10    8.30
 -14   8  -6   18.00   11.40
 -16  -8  -6   -0.20   11.40
  16  -8   6   12.60    8.00
 -16   8  -6   -1.70    7.10
 -16   8  -6   -6.10    9.80
  18  -8   6    5.30    8.40
 -18  -8  -6   11.10   14.00
 -18   8  -6   -9.10   10.00
 -18   8  -6    7.30    7.90
 -23  -9   6   -1.10   11.50
  23  -9  -6    8.70    7.00
 -23   9   6   -5.50    9.70
 -23   9   6   12.20   10.60
  23   9  -6   17.40    7.30
  21  -9  -6    0.50    5.20
 -21  -9   6   -5.60    9.40
 -21   9   6   -8.20    9.00
  21   9  -6    8.40    6.30
 -21   9   6    3.50    8.50
 -19  -9   6   -4.50    9.50
  19  -9  -6   11.60    5.60
 -19   9   6   -2.70    9.10
  19   9  -6   14.80    6.50
 -19   9   6   19.10    8.50
 -17  -9   6   -0.20    9.30
  17  -9  -6    3.90    4.50
 -17   9   6   -1.70    6.60
  17   9  -6    8.80    5.50
 -17   9   6   -7.10    7.40
 -15  -9   6   12.30    9.50
  15  -9  -6   29.50    5.90
 -15   9   6   27.90   10.80
  15   9  -6   32.10    7.90
 -15   9   6   31.60    8.70
  13  -9  -6   -1.60    3.90
 -13  -9   6    8.90    8.60
  13   9  -6   -6.60    5.70
 -13   9   6   -0.80    7.20
 -13   9   6    0.60    7.20
 -11  -9   6  209.38   19.80
 -11   9   6  218.68   20.80
  11   9  -6  198.38   16.50
  -9  -9   6   74.79   11.80
  -9   9   6   70.99   11.50
   9   9  -6   45.10    8.90
  -7  -9   6  655.43   30.30
   7  -9  -6  565.84   35.40
  -7   9   6  666.83   22.60
   7   9  -6  659.43   26.20
   7   9  -6  687.73   24.20
  -7   9   6  674.33   30.80
   5  -9  -6   97.69   11.60
  -5  -9   6   87.69   12.10
   5   9  -6   91.29   11.10
  -5   9   6   60.89    9.80
  -5   9   6  101.59    9.20
   5   9  -6   93.39   10.30
   3  -9  -6  424.16   22.30
  -3  -9   6  396.86   21.40
  -3   9   6  428.26   18.20
  -3   9   6  435.06   23.50
   3   9  -6  416.96   20.60
   3   9  -6  399.76   19.60
  -1  -9   6  109.29   12.20
   1  -9  -6  153.48   15.80
   1   9  -6  129.99   13.80
  -1   9   6  149.99   15.10
  -1   9   6  135.79   12.00
   1   9  -6  128.79   12.90
   1  -9   6   72.39    9.50
  -1  -9  -6   81.69   13.00
  -1   9  -6   61.99    9.30
   1   9   6   63.19   10.00
   1   9   6   61.89    9.00
  -1   9  -6   58.79    9.90
  -3  -9  -6   41.70   10.70
   3   9   6   35.50    7.90
   3   9   6   27.50    7.70
  -3   9  -6   34.20    7.60
  -3   9  -6   35.40    9.00
  -5  -9  -6   16.90    9.40
   5   9   6    6.70    5.60
  -5   9  -6    2.00    7.00
  -5   9  -6   16.90    6.20
   5   9   6   12.30    6.60
  -7  -9  -6    7.60    8.40
  -7   9  -6   10.10    6.50
  -7   9  -6  -10.40    7.60
  -9  -9  -6    6.50    9.60
  -9   9  -6    5.30    6.70
  -9   9  -6  -10.60    8.10
 -11  -9  -6   -0.80   10.00
  11  -9   6   12.00    8.10
 -11   9  -6   12.00    9.80
 -11   9  -6    4.80    6.70
 -13  -9  -6   14.80   13.10
  13  -9   6   25.60    9.20
 -13   9  -6   30.90    9.90
 -13   9  -6   25.10   11.00
  15  -9   6    6.50    7.90
 -15  -9  -6   12.90   13.60
 -15   9  -6   30.80   12.20
 -15   9  -6   12.90    8.40
 -17  -9  -6   85.39   20.90
  17  -9   6   78.99   12.80
 -17   9  -6   87.69   15.10
 -17   9  -6   80.19   16.50
  22 -10  -6   -0.30    6.10
  22  10  -6    0.60    6.10
 -22  10   6   -2.50   10.50
 -20 -10   6   14.20   13.50
  20 -10  -6   17.60    6.90
  20  10  -6   27.50    8.10
 -20  10   6    9.40   10.70
 -18 -10   6   37.50   13.40
  18  10  -6   61.59   10.30
 -18  10   6   54.19   15.20
 -16 -10   6   52.99   14.00
 -16  10   6   55.09   13.00
  16  10  -6   52.89    9.80
 -14 -10   6    9.20    8.30
  14  10  -6   -5.00    5.10
 -14  10   6    2.90    7.50
 -12 -10   6   44.10   11.10
 -12  10   6   46.20   12.00
  12  10  -6   35.20    8.90
 -10 -10   6  496.85   29.00
 -10  10   6  455.85   28.70
  10  10  -6  400.16   22.60
  -8 -10   6  651.03   32.40
  -8  10   6  697.23   33.90
   8  10  -6  646.04   27.60
  -6 -10   6 1011.60   39.40
  -6  10   6 1050.59   40.70
   6  10  -6 1002.20   33.10
   6  10  -6 1023.10   34.90
   4 -10  -6 1068.49   38.90
  -4 -10   6 1116.19   39.90
   4  10  -6 1128.29   37.10
   4  10  -6 1096.29   35.90
  -4  10   6 1198.28   42.40
  -4  10   6 1155.28   33.80
   2 -10  -6  263.07   20.20
  -2 -10   6  256.57   18.60
  -2  10   6  276.07   16.30
  -2  10   6  302.37   21.50
   2  10  -6  282.47   18.80
   2  10  -6  267.37   17.40
   0 -10  -6   11.10    7.30
   0 -10   6    7.70    5.70
   0  10   6   11.10    7.00
   0  10   6   15.70    6.40
   0  10  -6   10.70    6.80
   0  10  -6   10.60    5.80
  -2 -10  -6    5.90    7.50
  -2  10  -6   21.70    8.40
  -2  10  -6   13.00    6.10
   2  10   6    1.70    5.50
  -4 -10  -6   42.50   11.80
   4  10   6   44.50    9.30
  -4  10  -6   37.40    8.30
  -4  10  -6   45.80   10.10
  -6 -10  -6   10.50   10.20
  -6  10  -6    7.40    8.30
  -6  10  -6   12.20    6.60
  -8 -10  -6   -3.90    8.90
  -8  10  -6   -1.10    5.50
  -8  10  -6  -17.10    7.80
 -10 -10  -6   28.20   12.80
 -10  10  -6   18.50   10.50
 -10  10  -6   26.00    8.60
  12 -10   6   56.29   11.10
 -12 -10  -6   47.50   16.50
 -12  10  -6   38.20   11.30
 -12  10  -6   34.30   12.30
  14 -10   6  290.37   22.00
 -14 -10  -6  206.78   28.70
 -14  10  -6  231.48   25.40
 -14  10  -6  271.07   25.40
 -19 -11   6   28.80   14.20
 -19  11   6   30.10   12.80
  19  11  -6   31.00    8.70
 -17 -11   6   85.29   17.40
 -17  11   6   64.99   15.60
  17  11  -6   67.19   10.80
 -15 -11   6   -0.20    8.70
  15  11  -6    0.00    5.70
 -15  11   6  -10.70    7.90
 -13 -11   6   -1.40    7.90
 -13  11   6   12.80    9.50
  13  11  -6   -3.30    6.00
 -11 -11   6  203.28   22.10
 -11  11   6  220.68   23.30
  11  11  -6  182.08   17.00
  -9 -11   6  645.44   33.90
  -9  11   6  704.93   36.10
   9  11  -6  625.34   28.00
  -7 -11   6  567.34   30.30
   7  11  -6  508.55   25.50
  -7  11   6  557.64   32.80
  -5 -11   6  699.53   32.60
   5  11  -6  695.03   29.10
  -5  11   6  721.73   35.10
   5  11  -6  675.13   27.90
  -3 -11   6  620.94   28.90
   3 -11  -6  565.44   30.10
  -3  11   6  587.34   31.60
   3  11  -6  592.84   27.10
   3  11  -6  565.64   25.80
   1 -11  -6    1.60    7.40
  -1 -11   6    8.80    6.40
  -1  11   6    5.80    7.00
   1  11  -6    9.40    5.40
   1  11  -6   18.20    7.80
  -1 -11  -6   -5.50    6.40
  -1  11  -6   -1.70    6.00
   1  11   6   -1.70    5.70
  -1  11  -6    0.40    4.70
  -3 -11  -6   22.20   10.30
  -3  11  -6   22.50    8.60
  -3  11  -6   19.70    7.30
   3  11   6   20.90    7.70
  -5 -11  -6   46.50   13.40
  -5  11  -6   50.79   11.40
  -5  11  -6   42.30    9.70
  -7 -11  -6    6.70    9.00
  -7  11  -6   -7.80    7.00
  -7  11  -6   -1.30    5.70
  -9 -11  -6   27.00   13.60
  -9  11  -6   19.70    8.90
  -9  11  -6   38.80   12.10
 -11 -11  -6   57.49   16.70
 -11  11  -6   63.69   15.40
 -11  11  -6   60.29   12.40
 -13 -11  -6  133.99   23.60
 -13  11  -6  208.68   24.10
 -13  11  -6  197.78   22.50
 -18 -12   6   -2.00   11.90
 -18  12   6  -11.60    9.80
  18  12  -6    2.50    7.20
 -16 -12   6  -14.30    9.70
 -16  12   6   -5.70   10.20
  16  12  -6   -1.00    6.30
 -14 -12   6   14.20   11.80
 -14  12   6   20.10   11.50
  14  12  -6   13.70    8.50
 -12 -12   6    5.70    9.40
  12  12  -6   -0.60    6.70
 -12  12   6    8.90    9.80
 -10 -12   6  218.18   23.50
 -10  12   6  217.88   25.70
  10  12  -6  192.28   17.80
  -8 -12   6   68.49   13.80
  -8  12   6   58.99   13.40
   8  12  -6   87.59   12.80
  -6 -12   6   79.39   13.70
  -6  12   6   56.09   12.90
   6  12  -6   80.29   12.90
  -4 -12   6   27.60    9.40
   4  12  -6   31.20    7.60
  -4  12   6   27.20   11.30
   4  12  -6   33.70   10.10
   2 -12  -6   -7.60    7.00
  -2  12   6   -5.90    7.70
   2  12  -6   -2.30    6.30
   2  12  -6    0.90    4.70
   0 -12  -6   18.60    9.90
   0  12  -6   26.10    7.70
   0  12  -6   10.00    8.00
   0  12   6   11.30    8.20
  -2 -12  -6    8.00    9.40
   2  12   6   10.00    8.10
  -2  12  -6    2.70    6.10
  -2  12  -6   11.70    8.20
  -4 -12  -6   33.50   11.90
  -4  12  -6   26.80   10.40
  -4  12  -6   27.00    8.70
  -6 -12  -6    9.50    9.30
  -6  12  -6    6.80    8.90
  -6  12  -6    1.30    6.70
  -8  12  -6   53.09   13.50
  -8  12  -6   61.19   13.10
 -10 -12  -6   74.69   19.00
 -10  12  -6   70.19   15.20
 -10  12  -6   80.39   15.60
 -15 -13   6   82.79   17.80
 -15  13   6   88.59   18.40
  15  13  -6   77.29   12.20
 -13 -13   6   43.60   14.80
  13  13  -6   32.90   10.00
 -13  13   6   34.90   13.70
 -11 -13   6  -12.70    9.60
  11  13  -6   -4.30    7.50
 -11  13   6    5.90   10.40
  -9 -13   6   10.40   10.20
   9  13  -6   11.70    7.90
  -9  13   6    4.40   10.50
  -7 -13   6   32.90   11.60
  -7  13   6   31.90   12.10
   7  13  -6   31.80    9.80
  -5 -13   6   -1.90    7.00
  -5  13   6   -0.20    7.90
   5  13  -6   -0.80    7.50
  -3  13   6   41.50   12.30
   3  13  -6   33.10   10.20
   3  13  -6   28.50    7.80
  -1  13   6    0.80    8.20
   1  13  -6   15.90    7.00
   1  13  -6   14.40    8.50
  -1 -13  -6    2.70    9.70
  -1  13  -6   19.80    7.80
   1  13   6   16.40    9.90
  -1  13  -6   11.30    9.00
  -3 -13  -6  128.89   20.50
  -3  13  -6  114.19   15.50
  -3  13  -6  157.58   18.90
  -5 -13  -6  245.18   29.40
  -5  13  -6  278.37   24.30
  -5  13  -6  247.08   23.50
  -7 -13  -6  114.99   21.80
  -7  13  -6  133.09   18.30
  -7  13  -6  107.39   15.90
  -9 -13  -6  119.69   23.00
  -9  13  -6   93.29   17.10
  -9  13  -6   85.89   15.60
 -10 -14   6   -5.00    9.90
 -10  14   6   17.00   13.20
  10  14  -6   13.40    8.90
  -8 -14   6   52.39   14.40
  -8  14   6   66.79   15.60
   8  14  -6   42.00   11.40
  -6 -14   6   62.19   19.30
  -6  14   6   74.99   15.00
   6  14  -6   71.09   13.10
   4  14  -6   63.89   12.40
  -4  14   6   73.29   14.50
   2  14  -6   -8.20    7.50
   2  14  -6    0.60    6.20
  -2  14   6   -3.30    7.70
   0  14  -6   17.20    8.30
   0  14   6   15.30   10.40
   0  14  -6   15.40   10.10
  -2 -14  -6   67.29   15.90
  -2  14  -6   52.79   13.00
  -2  14  -6   55.29   11.80
  -4 -14  -6  305.77   32.00
  -4  14  -6  261.57   24.50
  -4  14  -6  295.97   25.10
  28   0  -7    7.20   12.30
  28   0  -7    0.80    7.80
  26   0  -7    4.40    6.50
  26   0  -7   12.10   11.30
  24   0  -7   -3.80    5.20
  22   0  -7   17.30    5.70
  20   0  -7   -5.30    3.50
 -20   0   7    3.10    4.10
 -18   0   7    7.50    4.00
  18   0  -7    3.50    3.80
  16   0  -7   19.70    4.10
 -16   0   7   18.40    3.90
 -16   0   7   14.70    4.10
 -14   0   7    5.20    2.80
  14   0  -7    8.60    2.90
 -14   0   7    1.20    2.60
 -12   0   7   22.60    3.90
 -12   0   7   13.70    3.40
  12   0  -7   13.50    3.10
  10   0  -7    2.90    2.20
 -10   0   7    4.50    2.60
 -10   0   7    5.60    2.80
   8   0  -7    5.70    2.10
  -8   0   7    0.50    2.00
  -8   0   7    5.50    2.70
  -6   0   7   -0.40    1.90
   6   0  -7    5.10    2.00
  -6   0   7    3.20    2.50
  -4   0   7    4.90    2.60
   4   0  -7    9.70    2.30
  -4   0   7    3.90    2.20
   2   0  -7    4.70    1.90
  -2   0   7    2.00    2.00
  -2   0   7   -1.70    2.20
   0   0   7    2.50    2.60
   0   0   7    3.80    2.30
  -2   0  -7    4.70    2.40
   2   0   7    4.80    2.10
   2   0   7    2.80    2.30
   2   0   7    0.90    2.60
   4   0   7    3.80    3.30
   4   0   7    1.20    2.30
   4   0   7    6.80    2.50
  -4   0  -7    0.50    2.60
   6   0   7    0.30    1.90
   6   0   7   -1.90    2.90
   6   0   7   -2.10    2.10
  -6   0  -7   -0.30    2.80
  -6   0  -7   -2.30    2.10
   8   0   7   -4.00    3.00
  -8   0  -7    1.10    3.10
   8   0   7    0.30    2.50
  -8   0  -7    2.90    3.70
  -8   0  -7    2.40    4.20
   8   0   7    2.70    3.00
 -10   0  -7   14.30    6.00
  10   0   7    8.00    4.70
 -10   0  -7    7.60    4.00
  10   0   7   16.10    4.40
  10   0   7   11.70    4.00
 -10   0  -7   12.90    5.80
 -12   0  -7    6.20    6.20
  12   0   7    7.50    4.30
 -12   0  -7    5.30    4.00
  12   0   7    3.30    5.20
 -12   0  -7   13.10    6.70
  12   0   7    9.70    4.20
  14   0   7   -1.20    4.60
  14   0   7   -5.30    4.80
 -14   0  -7   -5.30    7.10
 -14   0  -7    2.90    4.50
 -14   0  -7   -4.20    7.50
  14   0   7   -1.70    4.60
  16   0   7  -10.50    4.30
 -16   0  -7  -20.20    7.00
 -18   0  -7  -13.10    9.00
  18   0   7   -5.00    5.50
  20   0   7   -8.30    6.00
 -20   0  -7    2.10   10.70
  27  -1  -7    0.80    6.90
  27   1  -7    8.00   11.80
  27   1  -7    8.50    7.10
  25  -1  -7  135.59   14.40
  25   1  -7  126.49   13.60
  25   1  -7  125.89   19.10
  23  -1  -7  308.37   17.10
  23   1  -7  319.87   16.90
  23   1  -7  315.37   24.30
  21  -1  -7  187.68   12.70
 -21  -1   7  206.18   15.20
  21   1  -7  175.98   17.80
  21   1  -7  177.38   12.80
  19  -1  -7   66.69    7.90
 -19  -1   7   52.19    8.00
 -19   1   7   62.49    8.00
  19   1  -7   57.49    7.40
  19   1  -7   63.39   11.20
 -17  -1   7   24.50    5.80
  17  -1  -7   25.50    4.80
  17   1  -7   30.40    7.50
 -17   1   7   18.70    4.60
  17   1  -7   24.50    5.10
 -17   1   7   24.50    5.00
 -15  -1   7  575.54   17.50
 -15  -1   7  647.14   22.40
  15  -1  -7  633.44   18.90
  15   1  -7  600.74   23.80
 -15   1   7  655.03   19.60
  15   1  -7  625.34   19.20
 -15   1   7  609.74   20.30
 -13  -1   7  880.91   26.10
 -13  -1   7  831.92   22.40
  13  -1  -7  891.01   22.50
  13   1  -7  876.91   23.10
 -13   1   7  848.12   24.50
  13   1  -7  847.02   27.20
 -13   1   7  849.91   23.00
 -11  -1   7 1662.33   39.30
 -11  -1   7 1564.84   36.30
  11  -1  -7 1616.14   34.90
 -11   1   7 1556.24   37.90
  11   1  -7 1580.64   35.60
  11   1  -7 1627.44   39.50
 -11   1   7 1617.14   36.30
  -9  -1   7  620.64   19.10
   9  -1  -7  602.54   15.70
  -9  -1   7  574.24   18.00
  -9   1   7  615.64   17.50
  -9   1   7  568.94   18.70
   9   1  -7  606.54   16.60
   7  -1  -7  103.89    5.20
  -7  -1   7   97.19    7.50
  -7  -1   7   91.59    6.80
  -7   1   7   86.09    7.30
  -7   1   7   94.09    6.50
   7   1  -7  106.59    6.10
  -5  -1   7  154.48    8.20
  -5  -1   7  165.38    9.30
   5  -1  -7  160.18    6.00
   5   1  -7  155.98    7.60
  -5   1   7  153.08    9.30
  -5   1   7  148.39    7.90
   3  -1  -7  149.09    5.80
  -3  -1   7  125.89    8.80
  -3  -1   7  133.59    7.60
  -3   1   7  126.89    8.60
  -3   1   7  133.19    7.60
   3   1  -7  132.19    7.10
  -1  -1   7 1070.39   29.40
  -1  -1   7 1023.10   26.30
   1  -1  -7 1047.70   23.30
  -1   1   7 1074.09   26.60
   1   1  -7 1048.90   26.10
  -1   1   7 1083.09   29.00
  -1  -1  -7  699.73   18.00
   1  -1   7  669.13   20.10
   1  -1   7  698.23   22.70
   1   1   7  678.33   22.10
   1   1   7  713.43   20.30
  -1   1  -7  684.43   20.30
   3  -1   7  283.47   11.90
   3  -1   7  279.07   14.30
   3  -1   7  289.97   10.90
  -3  -1  -7  286.37   11.20
   3   1   7  284.77   12.20
   3   1   7  277.77    9.20
   3   1   7  294.57   14.20
  -3   1  -7  285.97   12.90
  -3   1  -7  289.57   12.50
  -5  -1  -7   27.20    4.70
   5  -1   7   28.00    4.30
   5  -1   7   26.00    4.40
  -5  -1  -7   23.40    5.60
   5  -1   7   20.50    5.40
   5   1   7   26.00    4.70
  -5   1  -7   29.50    5.40
   5   1   7   26.80    3.50
   5   1   7   22.80    5.20
  -5   1  -7   26.30    4.70
   7  -1   7   19.00    4.40
  -7  -1  -7   23.70    6.50
   7  -1   7   16.00    5.50
   7  -1   7   29.90    4.40
  -7  -1  -7   32.20    5.80
   7   1   7   24.10    5.10
   7   1   7   26.10    4.20
  -7   1  -7   26.20    5.40
   7   1   7   20.40    5.10
  -7   1  -7   20.10    4.60
   9  -1   7  163.88   14.10
   9  -1   7  200.58   11.30
   9  -1   7  213.28   10.80
  -9  -1  -7  212.88   12.30
  -9  -1  -7  208.88   13.20
  -9  -1  -7  201.18   16.10
   9   1   7  212.08   14.20
  -9   1  -7  191.88   12.70
   9   1   7  214.48   10.20
   9   1   7  215.08   12.60
  -9   1  -7  215.68   14.90
  -9   1  -7  195.58   14.00
 -11  -1  -7  199.48   16.90
  11  -1   7  174.98   11.50
  11  -1   7  182.38   15.50
 -11  -1  -7  207.58   14.70
 -11  -1  -7  188.58   12.60
  11  -1   7  188.98   11.50
  11   1   7  187.88   12.60
 -11   1  -7  181.78   15.60
  11   1   7  187.28   10.70
  11   1   7  175.98   14.10
 -11   1  -7  190.68   13.30
 -11   1  -7  162.58   15.30
 -13  -1  -7  246.98   14.90
  13  -1   7  231.28   17.80
  13  -1   7  237.68   14.10
 -13  -1  -7  240.38   17.80
 -13  -1  -7  241.28   20.60
  13  -1   7  241.88   14.00
  13   1   7  247.28   15.50
 -13   1  -7  255.67   18.80
  13   1   7  197.38   16.30
  13   1   7  257.87   13.30
 -13   1  -7  244.48   15.60
 -13   1  -7  208.68   18.70
  15  -1   7   38.10    8.00
 -15  -1  -7   53.89   11.70
  15  -1   7   52.59    9.50
 -15  -1  -7   41.90   11.30
 -15   1  -7   63.09   12.70
 -15   1  -7   54.39    8.40
  15   1   7   64.39    9.90
  15   1   7   50.89    7.50
 -17  -1  -7   -8.30   11.40
 -17  -1  -7  -14.50    7.60
  17  -1   7   -5.10    5.50
 -17   1  -7    6.20    9.80
  17   1   7    1.50    5.50
 -19  -1  -7   27.30   12.30
  19  -1   7   21.50    7.80
  19   1   7   13.10    7.20
 -19   1  -7   27.30   12.20
 -21  -1  -7    2.00   10.40
  21  -1   7   13.90    8.00
  21   1   7   12.50   13.60
 -21   1  -7    8.40   11.60
  21   1   7    6.40    7.30
  28  -2  -7   12.50    8.10
  28   2  -7    9.50    8.20
  28   2  -7    7.20   13.00
  26  -2  -7   57.49   10.00
  26   2  -7   71.79   10.50
  26   2  -7   42.90   13.80
  24  -2  -7  148.19   13.90
 -24  -2   7  103.19   16.50
  24   2  -7  155.98   13.60
  24   2  -7  185.48   20.60
 -22  -2   7  385.56   22.00
  22  -2  -7  408.56   18.70
  22   2  -7  397.06   25.20
  22   2  -7  381.76   18.10
  20  -2  -7  230.68   13.30
 -20  -2   7  227.48   17.00
  20   2  -7  208.98   13.30
  20   2  -7  225.58   18.30
 -18  -2   7    8.10    5.40
  18  -2  -7    3.80    3.90
 -18   2   7    6.30    3.40
  18   2  -7    8.20    6.50
  18   2  -7   -0.70    3.70
 -18   2   7    7.60    4.50
 -16  -2   7  217.98   14.80
  16  -2  -7  245.28   11.30
  16   2  -7  240.58   15.70
  16   2  -7  236.88   12.10
 -16   2   7  241.68   13.50
 -16   2   7  237.78   10.70
  14  -2  -7  922.81   23.60
 -14  -2   7  920.61   29.30
 -14   2   7  924.41   23.50
  14   2  -7  909.01   29.40
 -14   2   7  869.11   26.80
  14   2  -7  906.31   24.70
 -12  -2   7 3017.60   66.99
 -12  -2   7 3022.00   60.99
  12  -2  -7 3002.00   59.99
 -12   2   7 2933.51   64.99
 -12   2   7 3023.60   60.79
  12   2  -7 2917.11   61.49
 -10  -2   7 2312.77   52.89
  10  -2  -7 2307.17   46.60
 -10  -2   7 2328.87   49.30
 -10   2   7 2363.26   48.60
 -10   2   7 2241.28   51.99
  10   2  -7 2281.27   48.70
  -8  -2   7  954.50   26.50
  -8  -2   7  976.10   25.30
   8  -2  -7  949.71   21.20
   8   2  -7  957.70   24.00
  -8   2   7  930.81   26.70
  -8   2   7  964.00   24.00
   6  -2  -7   42.20    3.20
  -6  -2   7   21.10    4.10
  -6  -2   7   44.80    5.50
  -6   2   7   36.30    4.70
  -6   2   7   25.80    4.40
   6   2  -7   33.40    4.30
  -4  -2   7  213.88   11.00
  -4  -2   7  211.18    9.80
  -4   2   7  202.98    9.10
  -4   2   7  192.08   10.60
   4   2  -7  202.48    9.50
  -2  -2   7  910.31   26.30
  -2  -2   7  917.41   24.00
  -2   2   7  912.81   23.90
   2   2  -7  914.91   24.30
  -2   2   7  910.61   26.10
   0  -2   7 1256.67   33.50
   0  -2   7 1279.87   30.50
   0   2   7 1226.48   30.60
   0   2   7 1258.97   33.10
   0   2  -7 1222.18   30.40
   0   2  -7 1243.08   31.40
  -2  -2  -7  274.07    9.70
   2  -2   7  267.97   14.40
   2  -2   7  299.27   12.00
   2   2   7  272.17    8.30
  -2   2  -7  271.67   12.30
   2   2   7  285.97   12.70
  -2   2  -7  272.57   13.00
   2   2   7  282.87   14.10
  -4  -2  -7  109.99   10.90
   4  -2   7  114.49    7.60
   4  -2   7  105.79    7.60
  -4  -2  -7   99.59    7.20
   4  -2   7   97.99   10.30
  -4   2  -7   89.19    8.30
   4   2   7  100.69    5.50
   4   2   7  107.09    9.70
   4   2   7  110.59    8.20
   4   2   7   97.99    8.50
  -4   2  -7  123.69    9.50
   6  -2   7  192.58   10.20
   6  -2   7  181.48   13.10
   6  -2   7  180.18    9.70
  -6  -2  -7  182.48   14.20
  -6  -2  -7  186.38   10.50
   6   2   7  199.18   12.60
   6   2   7  191.08   12.00
   6   2   7  198.08   11.30
  -6   2  -7  199.88   12.50
   6   2   7  173.08    7.80
  -6   2  -7  168.38   10.90
   8  -2   7  246.58   12.70
  -8  -2  -7  254.17   13.50
   8  -2   7  269.47   12.30
  -8  -2  -7  289.87   18.70
   8  -2   7  274.57   16.90
   8   2   7  263.27   15.00
   8   2   7  261.17   10.40
   8   2   7  273.37   16.10
  -8   2  -7  267.27   15.90
   8   2   7  275.07   14.30
  -8   2  -7  248.68   13.70
 -10  -2  -7  253.27   14.50
 -10  -2  -7  224.18   13.30
  10  -2   7  260.17   17.30
  10  -2   7  228.68   12.30
  10  -2   7  231.48   12.50
 -10  -2  -7  242.78   18.80
  10   2   7  233.48   10.70
  10   2   7  212.98   15.10
 -10   2  -7  239.98   15.90
 -10   2  -7  280.37   17.50
  10   2   7  239.98   17.30
 -10   2  -7  258.97   14.80
  10   2   7  258.47   14.80
  12  -2   7  318.37   15.30
 -12  -2  -7  277.67   15.70
 -12  -2  -7  320.37   18.10
  12  -2   7  325.77   20.20
 -12  -2  -7  320.27   23.30
  12  -2   7  300.67   14.70
  12   2   7  325.57   17.50
  12   2   7  288.87   21.10
  12   2   7  313.67   13.30
 -12   2  -7  309.57   17.40
 -12   2  -7  284.87   18.60
  12   2   7  291.37   17.80
 -12   2  -7  327.87   21.00
 -14  -2  -7   76.89   11.30
 -14  -2  -7   85.49   14.20
  14  -2   7   99.69   10.90
  14  -2   7   81.79   11.50
 -14   2  -7   99.59   12.60
  14   2   7   91.39   15.30
 -14   2  -7   80.19   13.20
  14   2   7  105.79    9.50
  14   2   7   75.29   10.40
 -16  -2  -7   71.59   14.50
  16  -2   7   85.39   10.60
 -16  -2  -7   73.89   12.20
  16  -2   7   65.49   10.80
  16   2   7   94.09   15.70
  16   2   7   76.19   11.00
  16   2   7   71.69    8.60
 -16   2  -7   90.49   15.10
 -16   2  -7   69.69   10.00
 -18  -2  -7   27.70   10.10
  18  -2   7   25.40    7.70
 -18  -2  -7   35.10   11.90
 -18   2  -7   32.20   11.60
  18   2   7   53.29   14.70
  18   2   7   21.30    7.00
  20  -2   7   29.90    8.60
  20   2   7   38.30   14.50
 -20   2  -7   15.00   11.50
  27  -3  -7   32.80    8.80
  27   3  -7   20.70    7.70
 -25  -3   7   21.30    9.00
  25  -3  -7   24.50    7.30
  25   3  -7   27.40   11.80
  25   3  -7   19.40    7.10
 -23  -3   7   13.10    7.50
  23  -3  -7   12.40    6.20
  23   3  -7   26.90    6.80
  23   3  -7   22.80   10.50
 -21  -3   7  108.69   13.60
  21  -3  -7  126.59   11.50
  21   3  -7  143.79   16.70
  21   3  -7  110.19   11.40
 -19  -3   7   11.00    6.90
  19  -3  -7    5.60    4.80
  19   3  -7    5.20    4.60
 -19   3   7    4.90    5.90
  17  -3  -7   32.50    5.50
 -17  -3   7   25.70    7.30
  17   3  -7   12.80    4.60
 -17   3   7   15.30    6.10
  15  -3  -7  337.17   12.90
 -15  -3   7  324.37   18.20
  15   3  -7  307.67   13.80
 -15   3   7  322.67   11.80
 -15   3   7  307.67   16.50
  13  -3  -7  292.47   11.20
 -13  -3   7  311.27   16.50
 -13   3   7  310.87   11.30
  13   3  -7  289.77   12.70
 -13   3   7  277.87   14.90
 -11  -3   7 1165.98   28.00
 -11  -3   7 1163.38   33.90
  11  -3  -7 1151.98   26.30
 -11   3   7 1107.99   32.00
  11   3  -7 1148.89   28.90
 -11   3   7 1157.18   27.30
  -9  -3   7  143.29   10.00
  -9  -3   7  126.49    8.40
   9  -3  -7  146.49    6.20
  -9   3   7  122.29    7.50
  -9   3   7  131.69   10.10
   9   3  -7  123.79    8.10
  -7  -3   7    5.60    2.80
   7  -3  -7    6.40    1.70
  -7  -3   7    3.90    2.80
   7   3  -7    5.10    2.70
  -7   3   7    1.10    2.00
  -7   3   7    2.50    2.70
  -5  -3   7  250.37   11.80
  -5  -3   7  230.18   11.90
  -5   3   7  245.38   10.20
  -5   3   7  244.78   12.90
   5   3  -7  251.17   11.20
   5   3  -7  241.08   10.00
  -3  -3   7    5.90    2.60
  -3  -3   7    3.00    2.70
  -3   3   7    1.10    2.30
   3   3  -7    4.40    2.10
  -3   3   7    9.10    3.10
   3   3  -7    3.30    2.40
  -1  -3   7  227.68   10.30
  -1  -3   7  218.28   12.50
   1   3  -7  211.68   11.20
  -1   3   7  219.18   11.80
   1   3  -7  211.78   10.30
  -1   3   7  210.88   10.30
   1  -3   7  102.69    7.30
   1  -3   7   90.99    9.50
  -1  -3  -7  102.69   10.20
   1   3   7  103.69    9.00
   1   3   7  103.09    7.70
  -1   3  -7  100.49    7.90
  -1   3  -7   80.69    8.80
   3  -3   7   89.79    8.10
   3  -3   7  100.69   10.70
  -3  -3  -7  102.19   10.90
   3  -3   7  130.39    8.20
  -3   3  -7  102.59    8.70
   3   3   7   93.49    8.30
   3   3   7  112.89    9.80
  -3   3  -7  110.39   10.30
  -5  -3  -7   -7.40    4.10
   5  -3   7   -2.30    3.60
   5  -3   7   -1.70    2.90
   5  -3   7    3.50    2.70
  -5  -3  -7   -4.90    2.50
   5   3   7    6.60    3.60
   5   3   7   -8.40    3.10
   5   3   7   -2.60    1.90
  -5   3  -7   -0.10    4.00
  -5   3  -7    0.50    3.00
  -7  -3  -7   62.99    7.70
   7  -3   7   77.19    8.30
   7  -3   7   78.59    7.50
   7  -3   7   63.99    8.90
  -7  -3  -7   61.09   10.80
  -7   3  -7   74.79    8.80
  -7   3  -7   83.79   10.30
   7   3   7   65.19    8.40
   7   3   7   75.29    5.70
   7   3   7   72.29    9.50
   7   3   7   81.79   10.00
   9  -3   7   38.90    5.60
  -9  -3  -7   37.50    9.70
   9  -3   7   37.10    7.90
   9  -3   7   45.70    6.40
  -9  -3  -7   44.10    7.00
   9   3   7   52.29    5.50
   9   3   7   40.70    7.20
  -9   3  -7   38.90    6.50
   9   3   7   34.80    7.20
   9   3   7   41.40    9.50
  -9   3  -7   44.80    8.30
  11  -3   7   46.50    6.70
 -11  -3  -7   39.90    7.50
  11  -3   7   32.20    8.10
 -11  -3  -7   31.80   10.10
 -11  -3  -7   37.70    6.40
  11   3   7   35.60    5.30
  11   3   7   43.20    7.90
  11   3   7   37.10    7.30
 -11   3  -7   59.89    9.90
 -11   3  -7   36.90    7.10
 -11   3  -7   43.60    8.20
  11   3   7   38.30   10.70
 -13  -3  -7   65.79   10.40
  13  -3   7  100.09   10.40
 -13  -3  -7   76.99   13.70
  13  -3   7   65.89   10.90
  13   3   7   90.69    8.90
  13   3   7   85.39   14.60
 -13   3  -7   84.19   12.30
  13   3   7   78.59   10.70
 -13   3  -7   64.19    9.30
  15  -3   7   26.00    7.10
 -15  -3  -7   24.40    8.60
  15  -3   7   20.60    8.50
 -15  -3  -7   46.90   13.30
  15   3   7   28.60    7.90
 -15   3  -7   58.29   12.40
  15   3   7   40.90   12.90
  15   3   7   28.60    9.30
 -15   3  -7   25.50    7.50
 -17  -3  -7   -5.90    9.00
  17  -3   7   -4.50    6.00
  17   3   7   -3.20    5.60
 -17   3  -7    0.30    9.10
  17   3   7   -2.20    9.60
 -17   3  -7   -9.30    5.20
  19  -3   7    2.60    6.60
 -19  -3  -7    8.20   10.60
 -19   3  -7    9.40   10.40
  19   3   7   11.80   12.60
  21  -3   7    3.10    7.40
  21   3   7    4.90   14.90
  26  -4  -7  182.88   15.70
  26   4  -7  177.68   16.10
 -24  -4   7   41.40   11.60
  24  -4  -7   49.50    8.30
  24   4  -7   54.59    8.90
  22  -4  -7  181.68   13.50
 -22  -4   7  189.38   19.80
  22   4  -7  173.98   13.80
  20  -4  -7   30.30    6.50
 -20  -4   7   28.10    9.30
  20   4  -7   26.50    6.30
 -20   4   7   23.00    8.00
  18  -4  -7   36.50    6.40
 -18  -4   7   38.90    9.00
 -18   4   7   35.40    8.20
  18   4  -7   38.20    6.50
 -16  -4   7    9.50    5.70
  16  -4  -7    6.20    3.70
 -16   4   7    7.70    5.60
  16   4  -7   13.70    4.30
 -14  -4   7   12.10    5.40
  14  -4  -7    4.70    3.00
  14   4  -7    7.00    3.90
 -14   4   7    1.60    2.50
 -14   4   7    5.00    5.00
 -12  -4   7  133.39   11.90
  12  -4  -7  111.69    6.90
 -12   4   7  112.49   11.10
  12   4  -7  116.39    8.70
 -12   4   7  114.59    6.90
  10  -4  -7  724.93   17.90
 -10  -4   7  717.63   26.00
 -10  -4   7  713.93   20.60
 -10   4   7  736.83   19.20
 -10   4   7  704.23   24.70
  10   4  -7  710.73   18.40
  10   4  -7  730.13   21.80
   8  -4  -7   49.99    3.60
  -8  -4   7   38.20    5.00
  -8  -4   7   40.80    6.10
  -8   4   7   52.59    7.20
   8   4  -7   41.20    5.70
  -8   4   7   48.10    5.10
   8   4  -7   44.20    4.90
  -6  -4   7   76.19    8.00
  -6  -4   7   85.09    8.20
  -6   4   7   79.19    6.10
  -6   4   7   78.79    8.90
   6   4  -7   76.79    6.00
   6   4  -7   70.69    7.40
  -4  -4   7  418.56   17.10
  -4  -4   7  429.46   16.70
   4   4  -7  406.96   16.00
  -4   4   7  435.56   17.50
  -4   4   7  437.76   14.60
   4   4  -7  431.46   14.70
  -2  -4   7  261.47   12.30
  -2  -4   7  256.47   14.00
  -2   4   7  279.27   11.90
  -2   4   7  288.77   14.20
   2   4  -7  260.27   13.00
   2   4  -7  273.47   12.00
   0  -4   7 1280.37   32.00
   0  -4  -7 1263.57   36.90
   0  -4   7 1287.87   36.50
   0   4  -7 1267.57   34.60
   0   4   7 1321.17   32.50
   0   4  -7 1262.07   32.60
   0   4   7 1310.97   34.60
   2  -4   7  537.65   17.50
   2  -4   7  530.35   22.00
  -2  -4  -7  523.15   22.50
   2   4   7  544.05   20.00
  -2   4  -7  517.25   18.60
  -2   4  -7  514.35   21.00
   2   4   7  556.84   18.90
   4  -4   7  262.37   16.40
   4  -4   7  286.87   12.40
  -4  -4  -7  271.87   17.90
   4  -4   7  272.97   13.50
   4   4   7  285.87   14.60
   4   4   7  263.27   14.00
  -4   4  -7  254.97   15.70
  -4   4  -7  287.37   14.10
   6  -4   7   98.89    9.50
  -6  -4  -7   85.59    8.00
  -6  -4  -7   80.79   12.30
   6  -4   7   74.99   10.00
   6  -4   7  113.29    8.20
  -6   4  -7  100.99   11.30
   6   4   7  108.39    5.50
   6   4   7   81.39    9.40
  -6   4  -7  105.79   10.00
   6   4   7  114.89   10.70
   8  -4   7    7.50    5.30
  -8  -4  -7    0.10    7.00
   8  -4   7   21.50    5.20
   8  -4   7   12.70    3.80
   8   4   7   17.10    3.20
   8   4   7   14.00    5.30
  -8   4  -7   10.30    5.90
   8   4   7    8.10    5.90
  -8   4  -7   16.00    4.80
 -10  -4  -7   29.50   11.10
  10  -4   7   52.99   10.00
  10  -4   7   61.79    8.10
 -10   4  -7   54.39   10.10
  10   4   7   47.70    7.60
 -10   4  -7   51.19    8.10
  10   4   7   38.80    8.80
  12  -4   7   17.60    5.90
  12  -4   7   10.30    6.40
 -12  -4  -7    8.20    8.60
 -12   4  -7    9.30    5.50
  12   4   7   15.60    7.00
 -12   4  -7   27.00    8.80
 -14  -4  -7    6.50    8.90
  14  -4   7    5.40    5.30
 -14   4  -7   -1.80    5.10
  14   4   7    6.90    6.00
 -14   4  -7    3.50    7.90
  16  -4   7   -2.40    6.10
 -16  -4  -7    1.60    9.90
 -16   4  -7    4.20    8.70
  16   4   7   -0.10    6.50
 -16   4  -7   -3.10    5.60
 -18  -4  -7    6.30   11.80
  18  -4   7   14.00    7.30
 -18   4  -7   -0.60    9.90
 -18   4  -7   -8.50    6.20
 -20  -4  -7   11.30   12.00
  20  -4   7   15.70    8.20
 -20   4  -7   13.00   12.00
  27  -5  -7   51.89   10.10
 -27  -5   7   11.10   11.90
  27   5  -7   39.70    9.70
  25  -5  -7  366.16   19.40
 -25  -5   7  275.07   26.50
  25   5  -7  327.97   19.50
  23  -5  -7  383.26   18.70
 -23  -5   7  350.56   27.60
  23   5  -7  401.66   19.90
  21  -5  -7  497.85   20.00
 -21  -5   7  504.35   30.10
  21   5  -7  507.95   21.60
 -21   5   7  572.64   27.50
 -19  -5   7  231.88   20.50
  19  -5  -7  248.58   13.30
 -19   5   7  267.87   19.90
  17  -5  -7    4.00    4.00
 -17  -5   7   14.20    7.20
  17   5  -7    6.30    4.50
 -17   5   7    5.70    6.20
  15  -5  -7   64.89    6.60
 -15  -5   7   54.49   10.10
  15   5  -7   60.99    7.50
 -15   5   7   41.40    8.50
 -13  -5   7  506.85   24.40
  13  -5  -7  510.85   15.60
 -13   5   7  495.35   22.90
 -13   5   7  530.65   14.90
  13   5  -7  511.65   18.70
  11  -5  -7  746.03   18.90
 -11  -5   7  765.02   29.00
 -11   5   7  727.03   27.20
 -11   5   7  749.33   19.40
  11   5  -7  741.03   23.40
  -9  -5   7 1161.98   30.30
   9  -5  -7 1195.68   25.70
  -9  -5   7 1139.49   36.00
  -9   5   7 1177.98   35.30
  -9   5   7 1163.98   27.70
   9   5  -7 1137.09   27.50
   9   5  -7 1190.38   31.60
  -7  -5   7   97.99    9.60
  -7  -5   7  112.59    8.90
   7  -5  -7  110.59    4.70
  -7   5   7  106.79    6.90
   7   5  -7  109.49    6.90
  -7   5   7  102.89   10.30
   7   5  -7  105.89    8.90
  -5  -5   7   11.70    4.10
  -5  -5   7   10.00    3.70
  -5   5   7    5.40    4.00
  -5   5   7   11.20    3.10
   5   5  -7   11.30    3.00
   5   5  -7   11.90    4.20
  -3  -5   7 1071.09   30.30
  -3  -5   7 1090.59   32.00
   3  -5  -7 1052.09   31.80
   3   5  -7 1043.50   30.50
  -3   5   7 1058.49   27.60
  -3   5   7 1086.49   32.00
   3   5  -7 1063.89   28.30
  -1  -5   7 1385.46   39.10
  -1  -5   7 1395.36   35.30
   1  -5  -7 1419.66   39.80
  -1   5   7 1361.36   34.50
  -1   5   7 1376.16   37.60
   1   5  -7 1377.86   35.20
   1   5  -7 1392.16   37.60
  -1  -5  -7 1023.80   33.90
   1  -5   7 1016.60   32.80
   1  -5   7 1011.40   27.40
   1   5   7 1016.00   28.60
  -1   5  -7 1004.50   28.90
   1   5   7  966.00   29.50
  -1   5  -7  976.00   30.60
   3  -5   7  549.85   23.60
  -3  -5  -7  557.44   25.10
   3  -5   7  523.45   18.00
  -3   5  -7  571.74   20.80
  -3   5  -7  564.84   22.90
   3   5   7  550.94   20.30
   3   5   7  560.54   21.30
  -5  -5  -7   38.40    8.60
   5  -5   7   43.90    7.60
   5  -5   7   40.60    5.60
   5  -5   7   44.70    7.30
  -5   5  -7   25.30    6.90
   5   5   7   38.90    6.80
  -5   5  -7   44.00    6.40
   5   5   7   48.00    7.00
  -7  -5  -7   10.20    7.00
   7  -5   7    9.20    5.80
   7  -5   7    9.50    3.70
   7  -5   7   21.00    5.60
   7   5   7    7.10    5.10
   7   5   7    9.90    4.90
  -7   5  -7   11.40    4.30
  -7   5  -7    7.30    5.50
   9  -5   7  473.85   19.70
  -9  -5  -7  493.15   29.20
   9  -5   7  488.85   26.30
   9   5   7  481.85   22.20
   9   5   7  475.05   22.20
  -9   5  -7  468.35   24.40
  -9   5  -7  503.45   22.80
  11  -5   7   11.70    7.30
 -11  -5  -7   10.80    9.20
  11  -5   7    6.00    5.30
 -11   5  -7    7.70    7.40
 -11   5  -7   14.60    6.30
  11   5   7    9.00    7.10
 -13  -5  -7  244.08   25.50
  13  -5   7  287.37   16.80
 -13   5  -7  295.37   19.80
 -13   5  -7  314.37   22.50
  13   5   7  280.67   20.20
  15  -5   7   18.80    7.20
 -15  -5  -7   15.60   12.10
 -15   5  -7    5.30    9.20
  15   5   7   15.30    8.50
 -15   5  -7   13.50    6.90
 -17  -5  -7   14.20   11.70
  17  -5   7   -6.30    5.90
 -17   5  -7   -2.80    6.20
 -17   5  -7    2.00    8.90
  19  -5   7   18.20    8.20
 -19  -5  -7   28.40   13.50
 -19   5  -7    5.90   10.40
 -19   5  -7    0.20    7.20
  26  -6  -7  130.39   14.50
 -26  -6   7   70.19   16.20
  26   6  -7   90.79   11.90
  24  -6  -7  183.68   14.60
 -24  -6   7  130.29   19.00
  24   6  -7  158.68   15.00
 -22  -6   7  380.56   29.10
  22  -6  -7  366.86   18.10
 -22   6   7  404.96   25.60
  22   6  -7  364.86   19.30
  20  -6  -7  264.17   14.50
 -20  -6   7  255.67   23.60
  20   6  -7  273.77   16.50
 -20   6   7  274.77   21.70
  18  -6  -7   21.20    5.20
 -18  -6   7    9.80    8.30
 -18   6   7   14.00    7.70
  18   6  -7   15.70    6.00
 -16  -6   7    8.70    6.90
  16  -6  -7   14.90    4.40
  16   6  -7   17.90    6.20
 -16   6   7   19.00    7.60
  14  -6  -7  212.78   10.30
 -14  -6   7  234.98   18.50
 -14   6   7  215.28   18.20
  14   6  -7  212.18   13.00
 -12  -6   7  172.38   15.30
  12  -6  -7  175.18    8.60
  12   6  -7  186.58   12.10
 -12   6   7  156.88   15.30
 -12   6   7  139.09   11.70
  10  -6  -7  444.16   13.20
 -10  -6   7  429.26   22.10
 -10  -6   7  459.85   17.20
  10   6  -7  433.86   14.50
 -10   6   7  456.85   22.00
 -10   6   7  440.96   14.10
  10   6  -7  440.26   18.20
  -8  -6   7  178.98   14.00
   8  -6  -7  192.88    7.30
   8  -6  -7  175.58   11.00
  -8  -6   7  202.38   12.00
  -8   6   7  202.58   14.60
   8   6  -7  188.88    9.50
  -8   6   7  180.78    9.10
   8   6  -7  186.78   12.30
  -8   6   7  188.78    9.30
   6  -6  -7  197.98   12.00
  -6  -6   7  205.78   13.80
  -6  -6   7  193.98   12.40
   6   6  -7  202.78   10.40
  -6   6   7  208.28   14.20
  -6   6   7  202.18    9.80
   6   6  -7  194.68   12.20
  -4  -6   7  121.79   10.60
   4  -6  -7  123.49   10.40
  -4  -6   7  110.69   10.00
  -4   6   7  119.39   11.50
   4   6  -7  110.09    9.90
  -4   6   7  122.89    8.20
   4   6  -7  123.99    8.70
  -2  -6   7 1617.34   41.60
  -2  -6   7 1592.14   44.10
   2  -6  -7 1670.43   45.30
  -2   6   7 1602.44   43.60
   2   6  -7 1592.84   40.20
  -2   6   7 1630.74   39.50
   2   6  -7 1612.94   42.60
   0  -6   7  639.94   25.60
   0  -6  -7  605.54   25.50
   0  -6   7  634.54   21.20
   0   6  -7  588.24   23.20
   0   6  -7  621.04   21.90
   0   6   7  651.83   21.60
   0   6   7  620.94   23.50
   2  -6   7  431.36   22.00
  -2  -6  -7  422.96   22.30
   2  -6   7  414.36   16.30
   2   6   7  431.36   18.10
   2   6   7  413.16   18.70
  -2   6  -7  438.46   18.70
  -2   6  -7  425.66   20.20
  -4  -6  -7  297.87   20.00
   4  -6   7  286.37   19.20
   4  -6   7  266.97   13.00
   4   6   7  279.87   16.20
  -4   6  -7  299.17   17.90
  -4   6  -7  295.67   16.30
   4   6   7  300.77   15.90
   6  -6   7   64.39    8.20
   6  -6   7   95.79   10.60
   6  -6   7   79.19   11.80
  -6  -6  -7   80.79   12.40
  -6   6  -7   75.89    9.80
   6   6   7   93.19   10.40
  -6   6  -7   87.89   11.70
   6   6   7   82.99   10.70
   8  -6   7   36.20    9.10
   8  -6   7   33.90    7.30
  -8  -6  -7   48.40   10.90
   8   6   7   43.40    8.10
  -8   6  -7   36.40    9.00
   8   6   7   27.50    7.60
  -8   6  -7   41.80    8.40
  10  -6   7  175.38   14.10
 -10  -6  -7  197.78   22.10
 -10   6  -7  183.48   16.40
  10   6   7  215.58   17.00
 -10   6  -7  143.79   16.60
  12  -6   7   60.19    9.30
 -12  -6  -7   53.29   14.50
  12   6   7   51.29   10.00
 -12   6  -7   41.20    8.40
 -12   6  -7   62.79   12.30
  14  -6   7   19.50    7.60
 -14  -6  -7    2.10   11.40
 -14   6  -7   19.80    7.80
  14   6   7   12.20    9.10
 -14   6  -7   18.70    9.70
  16  -6   7    0.20    7.10
 -16  -6  -7    3.40   12.70
 -16   6  -7   19.60    8.20
 -16   6  -7   27.40   11.70
 -18  -6  -7   12.60   14.50
  18  -6   7   24.70    9.90
 -18   6  -7   27.70    9.50
 -18   6  -7   42.90   13.80
  25  -7  -7    9.70    7.10
 -25  -7   7   10.20   12.10
 -25   7   7    2.80    9.60
  25   7  -7    8.80    7.30
  23  -7  -7   17.60    6.50
 -23  -7   7   -1.10    9.70
 -23   7   7   -5.60    7.30
  23   7  -7   17.30    6.50
 -23   7   7   10.80    8.70
  21  -7  -7   10.10    5.50
 -21  -7   7    3.10    9.30
 -21   7   7    6.20    7.80
  21   7  -7    8.90    5.80
 -19  -7   7   22.40   10.30
  19  -7  -7   15.10    5.50
  19   7  -7   20.40    6.80
 -19   7   7   17.10    8.80
 -17  -7   7   -6.40    6.90
  17  -7  -7    4.50    4.40
 -17   7   7   -3.30    7.10
  17   7  -7    2.20    5.70
 -17   7   7    2.10    6.40
  15  -7  -7   28.20    5.20
 -15  -7   7   21.00    9.10
  15   7  -7   13.50    6.60
 -15   7   7   19.90    6.90
 -15   7   7   31.60    9.70
  13  -7  -7  108.49    7.80
 -13  -7   7   97.49   13.30
 -13   7   7   88.49   12.50
  13   7  -7   91.29   10.30
 -13   7   7  103.89   10.50
 -11  -7   7    4.60    5.40
  11  -7  -7   -0.50    2.80
  11   7  -7    9.90    4.90
 -11   7   7    2.10    3.70
 -11   7   7    3.90    5.50
   9  -7  -7   -0.80    2.30
   9  -7  -7    6.40    3.90
  -9  -7   7    4.30    4.80
  -9   7   7    5.60    5.50
  -9   7   7    3.00    2.80
   9   7  -7    2.40    2.50
   9   7  -7    8.30    4.60
  -9   7   7    0.60    3.10
  -7  -7   7   42.20    7.80
   7  -7  -7   50.09    7.40
  -7   7   7   33.70    7.10
   7   7  -7   50.99    7.80
   7   7  -7   57.39    6.90
  -7   7   7   41.80    5.50
  -5  -7   7   28.20    6.60
   5  -7  -7   31.40    6.40
  -5  -7   7   20.60    6.50
  -5   7   7   31.90    5.30
  -5   7   7   28.60    6.50
   5   7  -7   34.10    5.40
   5   7  -7   27.70    6.10
   3  -7  -7   43.70    7.80
  -3  -7   7   35.90    6.30
  -3  -7   7   39.30    7.10
   3   7  -7   40.80    7.20
  -3   7   7   42.60    6.00
  -3   7   7   43.30    8.10
   3   7  -7   54.99    7.30
  -1  -7   7   51.19    7.70
   1  -7  -7   43.80    8.10
  -1  -7   7   50.59    7.00
   1   7  -7   34.30    6.80
  -1   7   7   51.49    8.30
  -1   7   7   48.40    6.50
   1   7  -7   64.39    8.10
   1  -7   7    8.40    3.90
  -1  -7  -7   12.90    5.20
   1  -7   7   11.10    4.80
   1   7   7   12.30    4.40
  -1   7  -7    9.20    5.50
   1   7   7    9.60    4.80
  -1   7  -7    9.50    4.40
  -3  -7  -7    8.70    5.90
   3  -7   7   20.30    6.20
   3  -7   7   14.30    4.40
  -3   7  -7    7.90    4.80
   3   7   7   26.70    6.10
  -3   7  -7    5.80    6.40
   3   7   7   12.70    4.60
  -5  -7  -7   47.60   11.40
   5   7   7   44.70    8.30
   5   7   7   54.79    8.40
  -5   7  -7   53.99   10.30
  -5   7  -7   49.80    8.60
  -7  -7  -7   26.80   10.10
   7  -7   7   35.20    7.90
   7   7   7   36.40    7.10
   7   7   7   31.40    8.30
  -7   7  -7   35.10    8.00
  -9  -7  -7  254.57   26.00
   9  -7   7  315.17   18.10
  -9   7  -7  288.07   20.00
  -9   7  -7  280.57   21.60
   9   7   7  269.97   20.10
 -11  -7  -7   65.09   15.30
  11  -7   7   91.89   11.90
 -11   7  -7  100.49   14.90
 -11   7  -7   75.69   11.20
  11   7   7   85.69   12.80
 -13  -7  -7   19.20   12.80
  13  -7   7   20.50    7.60
 -13   7  -7   19.40    7.90
 -13   7  -7   16.30   10.70
  13   7   7   23.00    8.80
 -15  -7  -7   41.00   15.00
  15  -7   7   33.70    9.40
 -15   7  -7   37.90   13.00
 -15   7  -7   38.10   10.80
  17  -7   7   21.10    9.20
 -17  -7  -7   23.70   15.60
 -17   7  -7   24.70   12.80
 -17   7  -7   29.60   10.60
  24  -8  -7  102.19   12.10
 -24  -8   7  102.09   18.80
 -24   8   7  115.79   16.60
 -24   8   7   87.79   15.60
  24   8  -7   88.69   11.40
 -22  -8   7   90.29   16.70
  22  -8  -7  110.69   12.20
 -22   8   7   75.39   13.10
  22   8  -7   84.59   11.50
 -22   8   7   73.69   14.40
 -20  -8   7   56.59   13.40
  20  -8  -7   65.09    8.40
  20   8  -7   59.39    9.80
 -20   8   7   72.89   12.00
 -20   8   7   64.39   13.20
  18  -8  -7    0.40    4.40
 -18  -8   7   -1.50    8.40
  18   8  -7    2.90    5.70
 -18   8   7    1.10    8.10
 -18   8   7    2.90    6.70
  16  -8  -7   29.10    5.90
 -16  -8   7   15.70    9.40
 -16   8   7   22.80   10.10
  16   8  -7   12.60    6.70
 -16   8   7   10.90    6.70
 -14  -8   7  355.66   26.00
  14  -8  -7  375.76   14.70
 -14   8   7  396.66   26.40
  14   8  -7  354.16   19.50
 -14   8   7  329.57   18.80
  12  -8  -7 1525.35   36.00
 -12  -8   7 1551.74   52.39
  12   8  -7 1570.84   43.60
 -12   8   7 1661.83   51.69
 -12   8   7 1541.65   49.90
 -10  -8   7   30.10    8.30
  10   8  -7   31.00    7.10
 -10   8   7   27.20    8.60
   8  -8  -7  155.48   11.70
  -8  -8   7  139.79   14.70
  -8   8   7  138.79   15.50
   8   8  -7  156.18   13.30
  -8   8   7  151.88    9.30
   8   8  -7  150.98   10.40
  -6  -8   7    8.70    5.10
   6  -8  -7    7.40    4.50
  -6   8   7    2.80    3.10
   6   8  -7    6.10    3.20
   6   8  -7   12.00    5.40
  -6   8   7    5.50    5.50
   4  -8  -7   98.39   11.60
  -4  -8   7  116.19   12.10
  -4   8   7  111.59    9.60
   4   8  -7  111.99   11.90
  -4   8   7  104.59   13.10
   4   8  -7  112.99   10.10
  -2  -8   7  165.68   13.10
   2  -8  -7  152.78   14.70
   2   8  -7  153.38   13.90
   2   8  -7  159.58   12.20
  -2   8   7  143.89   11.70
  -2   8   7  165.28   14.80
   0  -8  -7  178.08   16.70
   0  -8   7  188.78   13.30
   0   8  -7  191.28   13.70
   0   8  -7  192.18   15.70
   0   8   7  199.68   13.60
   0   8   7  198.48   15.20
   2  -8   7  309.27   15.50
  -2  -8  -7  280.37   21.00
  -2   8  -7  278.77   19.20
  -2   8  -7  296.07   17.40
   2   8   7  298.57   16.90
   2   8   7  293.27   18.10
  -4  -8  -7   33.90   10.60
   4   8   7   33.80    7.90
  -4   8  -7   27.80    6.90
  -4   8  -7   28.00    8.90
   4   8   7   31.80    7.90
  -6  -8  -7   34.50   11.10
   6   8   7   14.70    7.80
   6   8   7   18.80    7.40
  -6   8  -7   19.40    6.80
  -6   8  -7   18.10    9.20
  -8  -8  -7   31.10   12.40
   8   8   7   38.80    9.80
  -8   8  -7   38.70    9.00
  -8   8  -7   46.70   11.50
  10  -8   7   36.60    9.20
 -10  -8  -7   39.60   13.70
 -10   8  -7   37.60   10.80
 -10   8  -7   29.20    8.50
  10   8   7   38.80    9.90
 -12  -8  -7  229.88   27.60
  12  -8   7  204.98   18.00
 -12   8  -7  258.97   21.30
 -12   8  -7  224.28   23.20
  14  -8   7  113.69   14.00
 -14  -8  -7  134.49   22.60
 -14   8  -7  158.88   20.00
 -14   8  -7  148.79   19.40
  16  -8   7   22.90    9.20
 -16  -8  -7   29.10   15.40
 -16   8  -7   21.60   13.10
 -16   8  -7   27.20   10.10
  23  -9  -7  175.38   14.50
 -23  -9   7  106.49   18.80
  23   9  -7  159.38   15.90
 -23   9   7  129.39   16.70
 -23   9   7  108.69   18.00
  21  -9  -7  184.88   13.90
 -21  -9   7  153.78   20.80
 -21   9   7  135.29   18.70
 -21   9   7  188.88   19.50
  21   9  -7  189.88   16.20
  19  -9  -7  112.09   11.10
 -19  -9   7   81.29   15.40
 -19   9   7   84.79   15.30
 -19   9   7   94.49   15.00
  19   9  -7   97.39   11.90
 -17  -9   7   -2.30    8.20
  17  -9  -7   -1.40    5.00
 -17   9   7  -11.40    7.80
  17   9  -7    0.80    5.10
 -15  -9   7   61.69   14.00
  15   9  -7   61.19   10.00
 -15   9   7   63.49   12.80
 -13  -9   7  915.61   40.90
  13   9  -7  897.21   32.50
 -13   9   7 1044.10   41.80
 -11  -9   7  506.45   29.10
  11   9  -7  496.65   23.70
 -11   9   7  514.35   29.50
  -9  -9   7  590.54   29.80
   9   9  -7  568.14   24.90
  -9   9   7  637.24   30.90
   7  -9  -7   13.20    5.60
  -7  -9   7   -1.10    6.60
  -7   9   7   23.30    8.10
   7   9  -7   14.20    6.70
  -7   9   7    4.60    3.90
   7   9  -7    2.30    4.20
   5  -9  -7   91.89   11.80
  -5  -9   7   77.59   11.20
  -5   9   7   95.29    9.30
   5   9  -7   87.49   11.10
  -5   9   7   83.19   12.20
   5   9  -7   79.39   10.20
   3  -9  -7  172.58   15.50
   3   9  -7  156.98   14.60
  -3   9   7  183.18   12.70
   3   9  -7  168.48   13.50
  -3   9   7  172.58   16.60
   1  -9  -7  607.84   28.90
  -1  -9   7  537.75   24.00
   1   9  -7  582.14   25.70
  -1   9   7  573.24   23.00
  -1   9   7  590.54   27.40
   1   9  -7  535.55   23.80
  -1  -9  -7  136.69   17.40
   1  -9   7  154.28   13.20
  -1   9  -7  116.39   13.50
  -1   9  -7  160.38   14.50
   1   9   7  157.68   14.40
   1   9   7  148.29   15.30
  -3  -9  -7  176.58   20.00
   3   9   7  133.29   15.40
  -3   9  -7  149.09   16.30
   3   9   7  140.39   14.70
  -3   9  -7  160.28   15.20
  -5  -9  -7  -15.00    7.10
  -5   9  -7   -3.40    7.00
   5   9   7    5.30    6.70
   5   9   7    0.10    5.40
  -5   9  -7    7.70    5.50
  -7  -9  -7    6.00    8.80
  -7   9  -7   14.70    6.70
   7   9   7    3.80    7.00
  -7   9  -7   -3.50    8.30
  -9  -9  -7   40.70   14.30
  -9   9  -7   25.20    8.60
   9   9   7   49.30   11.00
  -9   9  -7   33.60   11.40
 -11  -9  -7  133.59   21.10
  11  -9   7  155.08   17.00
 -11   9  -7  143.99   18.40
 -11   9  -7  180.58   20.20
 -13  -9  -7   61.49   17.50
  13  -9   7   58.79   12.00
 -13   9  -7   54.39   14.60
 -13   9  -7   45.60   11.80
 -15  -9  -7   28.10   16.50
  15  -9   7   43.60   11.00
 -15   9  -7   38.30   13.70
 -15   9  -7   36.50   11.30
 -20 -10   7   53.69   16.20
 -20  10   7   41.70   14.10
  20  10  -7   62.29   11.00
 -18 -10   7    7.80   10.30
  18  10  -7   10.00    6.60
 -18  10   7  -10.90    9.10
 -16 -10   7   -5.80    7.70
 -16  10   7  -10.30    7.80
  16  10  -7   -2.70    5.30
 -14 -10   7   27.00   10.80
  14  10  -7   31.30    8.70
 -14  10   7   20.00    9.80
 -12 -10   7   78.99   13.60
  12  10  -7   58.89   10.80
 -12  10   7   70.49   13.60
 -10 -10   7   73.49   13.50
 -10  10   7   86.19   14.20
  10  10  -7   88.19   11.80
  -8 -10   7    3.90    7.40
   8  10  -7   -7.20    6.10
  -8  10   7    3.70    7.80
  -6 -10   7   92.39   13.60
   6  10  -7   86.89   11.90
  -6  10   7  105.29   14.60
  -6  10   7  100.49   12.40
   6  10  -7   99.59   12.00
  -4 -10   7   75.59   12.00
   4 -10  -7   87.19   12.70
   4  10  -7   88.49   12.30
  -4  10   7   82.19    9.90
   4  10  -7   66.09    9.20
  -4  10   7   98.59   13.90
  -2 -10   7   62.49   10.10
   2 -10  -7   79.39   13.00
   2  10  -7   73.89   10.00
   2  10  -7   95.49   13.00
  -2  10   7   72.99    9.80
  -2  10   7   76.39   12.00
   0 -10  -7  152.48   18.40
   0 -10   7  145.89   14.20
   0  10   7  154.58   18.00
   0  10   7  137.69   13.90
   0  10  -7  146.19   15.80
   0  10  -7  159.78   15.40
  -2 -10  -7   -5.00    6.80
  -2  10  -7   -3.20    6.40
   2  10   7   -5.50    5.20
  -2  10  -7    1.40    5.30
   2  10   7   -1.80    5.60
  -4 -10  -7    0.30    8.30
   4  10   7   -4.10    6.50
   4  10   7   10.30    6.60
  -4  10  -7    8.70    8.10
  -4  10  -7    5.50    6.00
  -6 -10  -7   27.80   12.20
  -6  10  -7   28.10   10.10
  -6  10  -7   25.70    8.20
  -8 -10  -7   69.29   16.90
  -8  10  -7   70.29   12.10
  -8  10  -7   80.49   14.90
 -10 -10  -7   32.80   13.70
 -10  10  -7   30.20   11.80
 -10  10  -7   18.20    8.90
 -12 -10  -7   19.00   13.30
 -12  10  -7    4.90    8.20
 -12  10  -7    5.60   10.60
 -14 -10  -7    3.70   14.00
  14 -10   7   21.60    9.80
 -14  10  -7    1.90   11.80
 -14  10  -7    8.90    8.80
 -19 -11   7  -13.00   10.00
  19  11  -7   -0.70    6.40
 -19  11   7  -11.40    9.50
 -17 -11   7    1.70   10.80
  17  11  -7   12.40    7.80
 -17  11   7  -15.40    8.80
 -15 -11   7    6.70   10.40
 -15  11   7   32.00   12.40
  15  11  -7   30.20    9.40
 -13 -11   7   99.89   17.50
 -13  11   7  103.59   16.40
  13  11  -7   85.19   12.10
 -11 -11   7   48.40   12.60
 -11  11   7   50.19   12.50
  11  11  -7   62.69   11.40
  -9 -11   7   94.09   14.40
  -9  11   7  111.69   16.80
   9  11  -7   85.79   12.40
  -7 -11   7   12.10    8.10
  -7  11   7    8.80    8.90
   7  11  -7   17.90    8.10
  -5 -11   7    4.60    7.10
  -5  11   7   13.50    9.00
   5  11  -7    0.00    6.60
   5  11  -7   13.80    6.00
  -3 -11   7    7.10    6.90
   3 -11  -7    9.30    8.20
   3  11  -7    8.50    5.70
  -3  11   7    8.00    8.90
   3  11  -7   19.80    8.20
   1 -11  -7   -0.60    7.70
  -1  11   7   11.10    8.70
   1  11  -7   23.00    6.60
   1  11  -7   25.70    8.70
  -1 -11  -7   45.40   11.90
  -1  11  -7   53.49   10.00
   1  11   7   52.59   11.10
  -1  11  -7   67.39   11.40
  -3 -11  -7   24.20   10.70
   3  11   7   21.40    8.40
  -3  11  -7   20.90    9.30
  -3  11  -7   19.30    7.40
  -5 -11  -7   43.70   12.50
  -5  11  -7   58.89   12.10
  -5  11  -7   45.90   10.50
  -7 -11  -7   13.50   10.90
  -7  11  -7   14.80   10.00
  -7  11  -7   13.50    8.60
  -9 -11  -7   17.50   12.40
  -9  11  -7   -3.00    9.00
  -9  11  -7    4.90    7.30
 -11 -11  -7   46.80   15.50
 -11  11  -7   25.00   13.00
 -11  11  -7   64.49   13.00
 -16 -12   7   39.60   16.00
  16  12  -7   55.59   10.80
 -16  12   7   84.19   18.20
 -14 -12   7  150.28   21.90
 -14  12   7  169.78   21.50
  14  12  -7  164.08   17.90
 -12 -12   7  302.07   27.90
  12  12  -7  297.47   21.70
 -12  12   7  350.96   30.80
 -10 -12   7  305.87   26.30
  10  12  -7  311.37   21.60
 -10  12   7  395.76   30.50
  -8 -12   7  164.48   19.80
   8  12  -7  171.38   17.60
  -8  12   7  145.89   18.80
  -6 -12   7   13.20    8.10
   6  12  -7   10.00    8.40
  -6  12   7   17.80   10.40
  -4 -12   7   16.70    8.30
  -4  12   7    2.00    9.40
   4  12  -7   10.90    7.60
   4  12  -7   14.00    6.50
   2 -12  -7   81.29   14.90
   2  12  -7  124.39   14.70
  -2  12   7   73.89   14.00
   2  12  -7  105.69   14.10
   0 -12  -7  103.79   16.90
   0  12  -7  103.79   14.10
   0  12   7  101.89   15.50
   0  12  -7   91.99   13.10
  -2 -12  -7   79.29   16.30
  -2  12  -7   57.89   11.00
  -2  12  -7   90.69   13.80
   2  12   7   65.39   12.20
  -4 -12  -7   14.70   11.10
  -4  12  -7   -6.40    8.60
  -4  12  -7    7.20    6.90
  -6 -12  -7    2.90   10.20
  -6  12  -7   -0.80    7.40
  -6  12  -7  -10.20    7.90
  -8 -12  -7   29.70   13.90
  -8  12  -7   12.80   11.30
  -8  12  -7   19.10   10.30
 -10 -12  -7   98.89   21.10
 -10  12  -7   79.89   14.40
 -10  12  -7   87.89   16.70
 -15 -13   7   25.60   14.10
 -15  13   7   41.00   15.90
 -13 -13   7   97.59   18.60
  13  13  -7  105.79   14.30
 -13  13   7  161.78   22.50
 -11 -13   7  148.79   20.20
 -11  13   7  244.48   28.60
  11  13  -7  165.98   18.50
  -9 -13   7   60.19   14.20
  -9  13   7   94.49   18.10
   9  13  -7   53.89   11.30
  -7 -13   7   23.90   10.40
   7  13  -7   27.30    9.70
  -7  13   7   55.39   14.50
  -5 -13   7   -0.70    7.10
   5  13  -7   -8.50    7.30
  -5  13   7   16.50    9.50
  -3  13   7   46.40   12.20
   3  13  -7   38.70    8.40
   3  13  -7   63.69   12.60
   1  13  -7   68.19   11.90
  -1  13   7   59.49   13.10
   1  13  -7   68.19   12.70
  -1 -13  -7   82.29   16.20
  -1  13  -7   38.20   11.80
  -1  13  -7   61.59   11.80
   1  13   7   64.99   14.50
  -3 -13  -7   16.90   11.40
  -3  13  -7    9.80    7.90
  -3  13  -7   10.00    9.70
  -5 -13  -7   12.50   13.30
  -5  13  -7    5.90    9.00
  -5  13  -7    4.50   10.50
  -7 -13  -7   41.90   16.70
  -7  13  -7   53.39   14.10
  -7  13  -7   33.60   11.30
 -10 -14   7  -16.40    8.70
 -10  14   7   -2.30   11.20
  10  14  -7  -16.30    7.10
  -8 -14   7  -10.80    8.70
  -8  14   7   11.90   11.00
   8  14  -7   -2.90    7.80
  -6  14   7   27.90   11.30
   6  14  -7   -3.90    8.60
   4  14  -7    4.60    9.00
  -4  14   7   -0.10    8.40
   2  14  -7   -4.30    8.50
   2  14  -7    6.70    6.10
  -2  14   7    7.50    8.90
   0  14  -7    6.20   10.20
   0  14  -7   13.00    7.10
   0  14   7    6.90    9.80
  -2 -14  -7   23.50   12.90
  -2  14  -7   21.50    9.10
  -2  14  -7    5.70   10.90
  28   0  -8  617.34   27.30
  28   0  -8  573.04   37.40
  26   0  -8  667.23   36.50
  26   0  -8  655.73   27.00
  24   0  -8  447.76   28.90
  24   0  -8  424.66   20.40
  22   0  -8   65.39    8.60
 -20   0   8   -0.10    3.80
  20   0  -8    4.00    4.40
  18   0  -8  162.58   10.70
 -18   0   8  179.28   11.70
  16   0  -8   13.30    4.00
 -16   0   8   19.40    4.60
 -16   0   8   14.40    3.90
 -14   0   8  200.98   11.10
  14   0  -8  203.28    9.90
 -14   0   8  200.38   10.70
 -12   0   8  149.19    9.20
  12   0  -8  150.68    8.10
 -12   0   8  127.49    9.00
  10   0  -8  420.66   15.00
  10   0  -8  445.76   13.50
 -10   0   8  436.96   16.20
 -10   0   8  439.76   15.50
   8   0  -8 2601.04   51.29
  -8   0   8 2566.24   54.59
  -8   0   8 2461.85   55.49
   6   0  -8 3973.60   76.19
  -6   0   8 3950.40   79.69
  -6   0   8 3946.51   81.89
   4   0  -8 3911.71   75.69
  -4   0   8 3916.11   79.09
  -4   0   8 3902.31   81.69
  -2   0   8 2161.78   47.60
   2   0  -8 2140.39   44.80
  -2   0   8 2124.89   50.29
   0   0   8 1524.25   39.40
   0   0   8 1496.95   36.00
   0   0  -8 1488.25   34.10
  -2   0  -8   34.90    4.90
   2   0   8   24.90    4.40
   2   0   8   27.00    5.90
   4   0   8   28.40    5.50
   4   0   8   28.20    5.20
   4   0   8   34.10    4.20
  -4   0  -8   31.70    5.20
  -6   0  -8  351.56   15.70
  -6   0  -8  346.37   15.70
   6   0   8  343.97   17.80
   6   0   8  365.76   13.00
   6   0   8  355.56   15.40
  -8   0  -8   15.90    6.10
   8   0   8   15.30    4.00
   8   0   8    7.80    4.90
   8   0   8   12.30    3.90
  -8   0  -8   17.00    5.40
  -8   0  -8   13.20    4.60
  10   0   8    7.10    4.20
 -10   0  -8   17.30    6.70
  10   0   8    8.50    5.20
  10   0   8    8.00    4.00
 -10   0  -8    7.50    4.50
 -10   0  -8    2.50    5.70
  12   0   8  204.88   16.80
  12   0   8  211.08   13.80
 -12   0  -8  192.38   14.00
 -12   0  -8  197.68   17.00
 -12   0  -8  205.88   18.30
  12   0   8  191.78   12.20
 -14   0  -8  207.98   18.80
 -14   0  -8  224.08   15.80
  14   0   8  221.48   13.70
  14   0   8  225.98   15.30
  14   0   8  215.08   18.00
 -14   0  -8  231.68   20.90
 -16   0  -8  366.86   25.20
  16   0   8  356.56   18.00
  18   0   8  219.48   15.90
 -18   0  -8  209.18   22.10
 -20   0  -8  140.09   19.70
  20   0   8  176.08   16.10
  27  -1  -8  359.86   20.90
  27   1  -8  332.97   28.40
  27   1  -8  347.77   20.70
  25  -1  -8  252.67   17.20
  25   1  -8  267.77   16.80
  25   1  -8  262.57   24.30
 -23  -1   8  216.58   21.10
  23  -1  -8  237.58   15.40
  23   1  -8  209.38   14.70
  23   1  -8  246.68   21.60
 -21  -1   8    0.50    4.80
  21  -1  -8    4.60    4.40
  21   1  -8    1.50    7.80
  21   1  -8   -0.70    4.50
 -19  -1   8   25.20    6.10
  19  -1  -8   20.90    5.50
 -19   1   8   27.80    5.40
  19   1  -8   29.00    6.00
  19   1  -8   27.50    8.80
 -17  -1   8   30.30    6.00
  17  -1  -8   34.90    5.40
  17   1  -8   25.10    7.90
 -17   1   8   26.50    5.10
 -17   1   8   22.10    4.40
  17   1  -8   22.70    5.00
 -15  -1   8    1.40    3.20
 -15  -1   8    0.30    2.70
  15  -1  -8    5.20    2.70
  15   1  -8    2.60    4.40
 -15   1   8    3.60    3.40
  15   1  -8    0.00    2.50
 -15   1   8    3.60    2.90
 -13  -1   8   12.10    4.10
 -13  -1   8    6.90    3.20
  13  -1  -8   12.70    3.20
  13   1  -8   17.90    5.40
 -13   1   8   11.50    3.80
 -13   1   8   12.30    3.40
  13   1  -8   11.90    3.40
 -11  -1   8  439.46   16.80
 -11  -1   8  436.26   16.00
  11  -1  -8  455.55   13.70
  11   1  -8  460.45   14.80
 -11   1   8  445.46   16.70
 -11   1   8  451.05   15.40
  -9  -1   8 1604.34   38.70
  -9  -1   8 1664.53   39.00
   9  -1  -8 1672.73   34.60
  -9   1   8 1653.83   37.60
   9   1  -8 1635.74   35.90
  -9   1   8 1543.85   38.90
  -7  -1   8 2012.60   45.40
  -7  -1   8 2081.89   46.90
   7  -1  -8 2046.10   40.80
  -7   1   8 1967.70   46.90
  -7   1   8 2019.00   44.70
   7   1  -8 2029.50   43.00
   5  -1  -8 2551.14   49.50
  -5  -1   8 2542.65   56.49
  -5  -1   8 2568.44   54.49
  -5   1   8 2496.85   53.99
  -5   1   8 2444.36   56.39
   5   1  -8 2571.74   52.49
  -3  -1   8 1435.76   34.40
   3  -1  -8 1492.05   30.30
  -3  -1   8 1443.26   37.20
   3   1  -8 1413.86   32.90
  -3   1   8 1394.26   37.00
  -3   1   8 1409.06   34.70
  -1  -1   8 1708.23   42.80
  -1  -1   8 1708.53   39.40
   1  -1  -8 1666.63   35.40
  -1   1   8 1637.74   39.10
   1   1  -8 1671.43   38.30
  -1   1   8 1714.53   42.70
   1  -1   8  673.03   20.70
  -1  -1  -8  654.03   18.20
   1  -1   8  674.63   23.60
   1   1   8  685.53   23.40
   1   1   8  670.53   20.70
  -1   1  -8  677.83   20.70
   3  -1   8  117.49    7.40
   3  -1   8  107.29   10.30
  -3  -1  -8  109.09    7.50
   3  -1   8   90.89    7.70
  -3   1  -8  107.09    8.60
   3   1   8   97.79   10.00
  -3   1  -8  106.09    8.60
   3   1   8  105.19    8.40
   3   1   8   96.39    5.90
  -5  -1  -8    9.30    3.50
   5  -1   8    8.00    4.10
  -5  -1  -8    6.70    5.40
   5  -1   8   15.60    3.30
   5  -1   8   10.20    4.00
  -5   1  -8    7.30    3.40
   5   1   8    2.70    4.30
   5   1   8   10.90    3.70
   5   1   8   16.80    3.20
  -5   1  -8   24.60    5.20
  -7  -1  -8   15.80    6.40
   7  -1   8   20.10    4.30
   7  -1   8   21.30    4.90
   7  -1   8   11.60    5.40
  -7  -1  -8   23.10    5.20
  -7   1  -8   17.60    4.70
  -7   1  -8   24.90    5.80
   7   1   8   17.50    5.10
   7   1   8   18.30    4.40
   7   1   8   18.00    3.70
   9  -1   8   71.79    7.90
  -9  -1  -8   73.59    9.10
  -9  -1  -8   57.69   10.30
   9  -1   8   82.19    8.40
  -9  -1  -8   89.59   10.50
   9  -1   8   66.59    9.20
  -9   1  -8   76.69   10.50
   9   1   8   66.99    7.10
   9   1   8   54.89    7.70
   9   1   8   75.69    9.60
  -9   1  -8   60.39    7.60
  -9   1  -8   68.69    9.60
  11  -1   8   97.29    9.70
  11  -1   8  110.39   10.50
 -11  -1  -8  104.69   11.20
 -11  -1  -8   90.49   13.00
 -11  -1  -8  106.89   12.60
  11  -1   8   86.99   11.70
  11   1   8   91.09    8.80
  11   1   8   97.29   10.90
 -11   1  -8   92.49   12.30
 -11   1  -8   83.99   10.90
 -11   1  -8   89.99   12.30
  11   1   8  113.19   13.00
  13  -1   8  278.67   19.60
  13  -1   8  267.27   15.00
  13  -1   8  246.78   15.40
 -13  -1  -8  265.97   22.70
 -13  -1  -8  289.27   16.40
 -13  -1  -8  239.28   18.60
 -13   1  -8  247.78   20.10
  13   1   8  292.17   14.20
  13   1   8  265.07   18.40
 -13   1  -8  273.87   21.10
  13   1   8  281.57   17.10
 -13   1  -8  271.07   16.90
 -15  -1  -8  303.77   25.00
 -15  -1  -8  299.87   21.40
  15  -1   8  306.17   21.00
  15  -1   8  272.17   16.20
  15   1   8  268.97   14.90
 -15   1  -8  255.37   22.10
  15   1   8  272.17   18.00
 -15   1  -8  300.87   19.00
 -17  -1  -8  250.47   22.10
  17  -1   8  258.27   16.70
 -17   1  -8  264.57   23.80
  17   1   8  268.17   16.20
  19  -1   8  195.28   16.10
 -19  -1  -8  137.09   20.10
  19   1   8  227.38   21.00
  19   1   8  163.78   22.60
 -19   1  -8  155.68   20.40
  28  -2  -8   15.90    7.90
  28   2  -8   16.80   13.30
  28   2  -8   17.70    8.30
  26  -2  -8   56.59    9.70
  26   2  -8   43.00   14.80
  26   2  -8   52.29    9.50
 -24  -2   8   14.20    7.40
  24  -2  -8    8.90    6.00
  24   2  -8    5.70   10.30
  24   2  -8   19.00    6.50
  22  -2  -8   43.80    7.90
 -22  -2   8   40.70    9.10
  22   2  -8   37.70    7.00
  22   2  -8   37.20   11.10
  20  -2  -8  232.98   13.50
 -20  -2   8  247.88   17.50
  20   2  -8  233.58   18.70
  20   2  -8  210.68   13.40
  18  -2  -8  510.45   18.30
 -18  -2   8  517.65   23.00
  18   2  -8  496.85   24.10
 -18   2   8  508.05   21.10
 -18   2   8  532.35   17.50
  18   2  -8  497.85   18.90
 -16  -2   8  264.47   15.70
  16  -2  -8  264.57   11.80
  16   2  -8  252.37   12.70
  16   2  -8  255.17   16.00
 -16   2   8  263.37   14.60
 -16   2   8  275.17   11.80
  14  -2  -8  610.24   17.90
 -14  -2   8  588.74   18.90
 -14  -2   8  632.34   23.00
  14   2  -8  598.54   19.10
 -14   2   8  613.74   18.50
 -14   2   8  593.94   21.60
 -12  -2   8  107.69    9.60
  12  -2  -8  114.59    6.90
 -12  -2   8  113.79    8.60
 -12   2   8  101.49    9.70
  12   2  -8   98.39    7.50
 -12   2   8   98.99    7.40
 -10  -2   8  416.06   16.60
  10  -2  -8  419.96   12.40
 -10  -2   8  428.76   15.60
 -10   2   8  400.86   16.80
  10   2  -8  417.96   14.30
 -10   2   8  410.86   14.40
  -8  -2   8   74.59    7.20
  -8  -2   8   73.09    7.50
   8  -2  -8   69.39    4.60
  -8   2   8   56.79    6.30
  -8   2   8   70.79    8.10
   8   2  -8   80.89    6.60
   6  -2  -8   57.79    3.90
  -6  -2   8   35.60    5.50
  -6  -2   8   62.99    6.40
   6   2  -8   67.79    6.50
  -6   2   8   37.60    5.10
  -6   2   8   48.30    6.00
  -4  -2   8   23.90    4.10
  -4  -2   8   15.70    4.20
  -4   2   8    1.90    3.30
  -4   2   8    7.90    3.80
  -2  -2   8  379.96   16.60
  -2  -2   8  406.26   14.60
  -2   2   8  358.36   14.20
  -2   2   8  360.96   16.70
   2   2  -8  401.96   14.70
   0  -2   8  727.43   21.10
   0  -2   8  668.63   23.70
   0   2   8  690.43   21.30
   0   2  -8  669.33   21.00
   0   2  -8  713.13   21.80
   0   2   8  737.13   24.50
   2  -2   8   10.10    3.50
   2  -2   8   11.00    4.70
  -2  -2  -8    7.30    2.60
  -2   2  -8   17.40    4.50
   2   2   8    9.00    4.10
   2   2   8    7.80    4.20
  -2   2  -8    9.70    3.40
  -4  -2  -8  315.07   12.10
   4  -2   8  300.37   16.80
   4  -2   8  333.97   13.20
   4  -2   8  296.37   13.30
  -4  -2  -8  302.67   17.70
   4   2   8  311.17   14.50
   4   2   8  301.27   10.00
  -4   2  -8  293.57   14.90
   4   2   8  311.17   16.40
   4   2   8  269.97   13.50
  -4   2  -8  289.47   13.90
   6  -2   8  243.88   16.00
  -6  -2  -8  260.27   18.10
   6  -2   8  284.47   12.60
  -6  -2  -8  285.17   13.30
   6  -2   8  267.67   13.50
   6   2   8  288.37   16.60
  -6   2  -8  269.87   15.40
  -6   2  -8  290.47   14.40
   6   2   8  270.27   14.20
   6   2   8  284.97   10.30
  -8  -2  -8  433.46   18.20
   8  -2   8  415.16   16.40
   8  -2   8  440.86   17.30
  -8  -2  -8  406.86   23.30
   8  -2   8  408.56   21.00
   8   2   8  400.36   13.80
   8   2   8  343.17   20.10
  -8   2  -8  426.26   18.40
  -8   2  -8  394.96   20.00
   8   2   8  422.26   18.40
   8   2   8  402.86   20.20
 -10  -2  -8  240.98   20.20
  10  -2   8  239.98   13.50
 -10  -2  -8  236.08   14.40
  10  -2   8  242.18   12.90
 -10  -2  -8  254.97   15.70
  10  -2   8  239.98   17.90
  10   2   8  242.78   15.10
 -10   2  -8  238.28   17.40
 -10   2  -8  208.88   17.10
 -10   2  -8  257.47   15.60
  10   2   8  250.27   17.00
  10   2   8  236.18   11.40
  10   2   8  231.68   18.30
 -12  -2  -8  102.89   15.60
  12  -2   8  109.19   12.00
 -12  -2  -8  117.19   13.70
  12  -2   8  116.89   11.40
  12  -2   8  113.99   13.70
 -12  -2  -8  101.19   11.80
  12   2   8  116.09   13.90
  12   2   8  114.49   13.10
  12   2   8  134.09   16.40
 -12   2  -8   95.69   11.00
 -12   2  -8  120.59   14.60
 -12   2  -8  128.29   16.20
  12   2   8  111.29    9.80
 -14  -2  -8   30.80   11.60
  14  -2   8   23.40    8.30
 -14  -2  -8   15.10    8.60
  14  -2   8   30.10    7.50
 -14   2  -8   18.30    7.40
 -14   2  -8   14.70    9.10
  14   2   8   42.60   11.40
  14   2   8   22.10    8.00
  14   2   8   21.10    6.00
  16  -2   8   58.39    9.30
 -16  -2  -8   84.39   19.50
  16  -2   8   80.59   12.60
 -16  -2  -8   59.49   14.70
  16   2   8   70.99   11.70
 -16   2  -8  105.49   15.40
 -16   2  -8   61.39   10.20
  16   2   8   84.09   16.80
  18  -2   8   24.80    8.00
 -18   2  -8   29.70   11.30
  18   2   8   17.10   12.80
  20  -2   8    2.80    7.30
  20   2   8   10.80   13.10
 -20   2  -8    3.20   10.80
  27  -3  -8   53.09   10.10
  27   3  -8   43.00    8.60
  25  -3  -8   -5.10    5.00
 -25  -3   8   -3.60    6.20
  25   3  -8    4.70    5.50
  23  -3  -8   -1.30    5.10
 -23  -3   8   -0.60    6.50
  23   3  -8    0.80    4.80
 -21  -3   8  195.48   17.80
  21  -3  -8  213.78   13.60
  21   3  -8  219.28   14.00
 -19  -3   8  848.22   32.40
  19  -3  -8  811.52   24.90
  19   3  -8  795.12   25.80
 -19   3   8  789.52   28.70
  17  -3  -8 1287.07   32.00
 -17  -3   8 1225.88   39.30
 -17   3   8 1194.28   36.30
  17   3  -8 1211.08   33.10
 -17   3   8 1312.77   36.30
 -15  -3   8 1032.30   33.80
  15  -3  -8 1036.10   26.40
 -15   3   8 1063.99   26.40
 -15   3   8 1021.30   31.70
  15   3  -8  997.20   28.30
 -13  -3   8 1486.25   41.50
  13  -3  -8 1477.55   33.30
  13   3  -8 1402.06   35.50
 -13   3   8 1479.05   40.10
 -13   3   8 1552.14   34.70
 -11  -3   8   56.19    7.60
  11  -3  -8   73.39    5.40
 -11  -3   8   81.19    7.70
 -11   3   8   57.79    6.10
  11   3  -8   72.89    7.10
 -11   3   8   46.20    6.60
  -9  -3   8   23.70    4.70
   9  -3  -8   23.60    2.90
  -9  -3   8   27.40    4.40
  -9   3   8   21.60    3.70
   9   3  -8   22.60    4.20
  -9   3   8   15.30    4.50
  -7  -3   8    3.80    2.90
  -7  -3   8    5.90    3.00
   7  -3  -8    6.20    1.80
  -7   3   8    7.30    2.70
  -7   3   8    5.10    3.70
   7   3  -8    3.90    3.50
  -5  -3   8 1721.43   40.80
  -5  -3   8 1700.83   41.80
  -5   3   8 1670.93   38.60
   5   3  -8 1663.83   38.30
   5   3  -8 1656.13   39.60
  -5   3   8 1694.03   42.20
  -3  -3   8   76.89    7.30
  -3  -3   8   77.19    8.70
   3   3  -8   83.69    6.90
  -3   3   8   86.79    8.90
   3   3  -8   88.39    7.60
  -3   3   8   80.29    6.80
  -1  -3   8    0.30    3.20
  -1  -3   8   -0.70    2.80
   1   3  -8    2.90    2.50
   1   3  -8    0.10    3.00
  -1   3   8   -1.80    2.80
  -1   3   8    8.10    3.10
   1  -3   8  202.88   13.60
   1  -3   8  211.38   10.80
   1   3   8  223.58   13.20
  -1   3  -8  244.48   13.20
  -1   3  -8  203.48   11.20
   1   3   8  191.48   11.60
   3  -3   8  393.36   19.10
   3  -3   8  414.56   15.70
  -3  -3  -8  403.96   20.40
  -3   3  -8  399.16   16.40
   3   3   8  386.16   16.30
   3   3   8  382.66   18.40
  -3   3  -8  403.76   17.90
   5  -3   8 1466.45   42.40
  -5  -3  -8 1397.36   44.60
  -5  -3  -8 1443.86   34.40
   5  -3   8 1488.25   36.80
   5  -3   8 1469.75   36.40
  -5   3  -8 1473.95   38.40
   5   3   8 1503.25   41.20
   5   3   8 1399.76   30.70
  -5   3  -8 1438.06   40.80
   5   3   8 1431.06   38.10
   7  -3   8  712.23   22.60
   7  -3   8  707.33   28.20
  -7  -3  -8  682.83   30.40
   7  -3   8  668.63   22.50
  -7  -3  -8  715.33   22.60
   7   3   8  672.13   24.50
   7   3   8  694.33   27.00
  -7   3  -8  713.63   24.60
  -7   3  -8  735.33   27.90
   7   3   8  683.13   18.20
   9  -3   8  463.85   23.60
  -9  -3  -8  446.26   18.80
   9  -3   8  447.56   18.20
   9  -3   8  435.16   17.70
  -9  -3  -8  446.76   26.10
   9   3   8  414.26   22.00
   9   3   8  425.26   14.40
  -9   3  -8  483.05   20.60
   9   3   8  440.56   22.00
   9   3   8  453.65   20.30
  -9   3  -8  436.56   22.50
  11  -3   8  295.87   20.30
 -11  -3  -8  303.07   23.30
 -11  -3  -8  257.27   15.70
 -11  -3  -8  279.67   18.30
  11  -3   8  263.67   15.20
  11   3   8  276.37   17.40
  11   3   8  259.17   19.60
  11   3   8  263.47   17.90
 -11   3  -8  265.67   19.90
 -11   3  -8  295.87   17.80
  13  -3   8    3.00    5.00
 -13  -3  -8    4.70    9.20
  13  -3   8    4.30    6.20
  13   3   8    0.10    7.90
 -13   3  -8    1.90    6.40
 -13   3  -8    4.00    5.70
  13   3   8   -2.30    5.40
 -15  -3  -8    9.70   10.10
  15  -3   8    9.90    6.10
  15  -3   8    5.50    7.00
 -15   3  -8   11.90    8.30
  15   3   8    9.90    7.20
  15   3   8   -0.50    9.30
 -15   3  -8   -0.90    6.00
  17  -3   8   12.60    6.50
 -17  -3  -8    7.40    9.90
  17   3   8    5.60    6.60
 -17   3  -8   -5.80    5.70
 -17   3  -8    7.90    9.40
  17   3   8   -5.70   11.10
  19  -3   8    2.70    6.80
 -19  -3  -8   16.60   14.00
  19   3   8   -4.70   12.50
 -19   3  -8    2.20   10.00
  28   4  -8  104.29   12.90
  26  -4  -8   66.89    9.60
 -26  -4   8   37.50   11.40
  26   4  -8   71.39   11.00
  24  -4  -8   24.50    6.80
 -24  -4   8    7.70    9.10
  24   4  -8   28.90    7.40
  22  -4  -8   18.90    5.90
 -22  -4   8   11.50    8.70
  22   4  -8   15.30    6.20
  20  -4  -8  250.37   13.90
 -20  -4   8  265.57   20.40
  20   4  -8  256.37   15.00
 -20   4   8  252.27   18.50
  18  -4  -8  837.02   24.70
 -18  -4   8  856.31   33.50
  18   4  -8  809.22   26.30
 -18   4   8  844.92   31.10
 -16  -4   8  514.55   24.50
  16  -4  -8  501.85   17.00
  16   4  -8  458.15   18.60
 -16   4   8  502.25   22.80
 -14  -4   8  978.00   34.10
  14  -4  -8 1011.70   25.50
 -14   4   8  996.10   32.30
 -14   4   8 1058.19   25.80
  14   4  -8  981.90   28.30
  12  -4  -8   17.80    3.30
 -12  -4   8   16.50    3.90
 -12  -4   8   18.20    5.20
  12   4  -8   21.30    3.20
 -12   4   8   20.30    5.80
 -12   4   8    8.60    3.60
  12   4  -8   17.20    4.40
 -10  -4   8   87.69    8.30
  10  -4  -8   96.39    5.50
 -10  -4   8   91.29    9.90
 -10   4   8   98.09    7.00
 -10   4   8  104.79   10.60
  10   4  -8  101.69    8.40
  10   4  -8   81.29    6.30
  -8  -4   8  273.47   14.40
   8  -4  -8  269.17    8.30
  -8  -4   8  279.57   13.10
  -8   4   8  270.87   15.10
   8   4  -8  276.57   10.90
  -8   4   8  284.27   11.30
   8   4  -8  250.27   12.30
  -6  -4   8  471.95   18.20
  -6  -4   8  475.95   18.40
  -6   4   8  473.75   15.70
   6   4  -8  451.75   17.10
  -6   4   8  469.45   19.40
   6   4  -8  473.05   15.60
  -4  -4   8  356.56   15.20
  -4  -4   8  358.76   16.60
  -4   4   8  358.46   16.70
   4   4  -8  355.16   13.90
  -4   4   8  351.06   13.70
   4   4  -8  344.57   15.00
  -2  -4   8  752.12   22.80
  -2  -4   8  727.43   25.40
  -2   4   8  749.92   24.90
  -2   4   8  747.53   22.30
   2   4  -8  718.33   22.20
   2   4  -8  726.33   23.70
   0  -4   8    9.00    4.60
   0  -4   8    7.70    3.50
   0  -4  -8    9.30    4.80
   0   4  -8    9.60    3.60
   0   4   8   14.50    3.80
   0   4   8    8.20    3.70
   0   4  -8   16.50    4.80
   2  -4   8  296.37   13.20
  -2  -4  -8  299.07   17.70
   2  -4   8  280.27   16.70
  -2   4  -8  273.37   15.50
   2   4   8  295.47   14.00
  -2   4  -8  285.67   13.90
   2   4   8  301.87   16.00
   4  -4   8  499.25   22.60
   4  -4   8  508.85   17.90
  -4  -4  -8  502.25   24.50
   4   4   8  438.06   21.40
  -4   4  -8  496.25   19.40
   4   4   8  504.35   19.50
  -4   4  -8  472.75   21.50
   6  -4   8 1217.08   32.00
   6  -4   8 1206.18   33.30
  -6  -4  -8 1188.78   41.80
   6  -4   8 1206.48   39.20
   6   4   8 1178.38   34.90
  -6   4  -8 1203.98   34.90
   6   4   8 1200.98   37.30
  -6   4  -8 1176.28   37.70
  -8  -4  -8  281.67   21.90
   8  -4   8  272.37   19.60
   8  -4   8  263.17   13.80
   8  -4   8  294.07   14.90
  -8   4  -8  256.07   18.10
  -8   4  -8  271.07   16.50
   8   4   8  274.37   16.50
   8   4   8  257.87   18.20
  10  -4   8  221.58   14.10
 -10  -4  -8  199.38   21.50
  10  -4   8  222.68   19.50
  10   4   8  209.78   15.90
 -10   4  -8  225.28   16.40
  10   4   8  171.18   16.30
 -10   4  -8  222.68   18.10
 -12  -4  -8   -7.10    8.00
  12  -4   8   -7.20    5.90
  12  -4   8   -2.70    4.60
 -12   4  -8    7.20    7.30
 -12   4  -8   -9.00    4.70
  12   4   8   -0.20    5.60
 -14  -4  -8   18.30   11.30
  14  -4   8   25.80    9.00
  14  -4   8   28.10    7.50
  14   4   8   18.20    8.20
 -14   4  -8   14.30    6.70
 -14   4  -8   22.50    9.80
  16  -4   8   45.10    9.20
 -16  -4  -8   58.19   15.10
 -16   4  -8   30.10    8.90
 -16   4  -8   50.49   12.40
  16   4   8   44.40   10.60
  18  -4   8   15.20    8.10
 -18  -4  -8   32.30   13.20
 -18   4  -8   37.40   12.60
 -18   4  -8    4.40    6.80
  27  -5  -8   24.30    8.20
 -27  -5   8   -2.40   10.10
  27   5  -8   27.70    8.30
  25  -5  -8   26.70    7.80
 -25  -5   8   13.70   10.60
  25   5  -8   25.10    7.70
 -23  -5   8  -10.90    8.10
  23  -5  -8    1.10    4.90
  23   5  -8    5.30    5.40
  21  -5  -8    0.80    4.30
 -21  -5   8   -4.20    7.50
 -21   5   8   10.40    6.50
  21   5  -8    7.90    5.40
  19  -5  -8   45.90    6.90
 -19  -5   8   30.40    8.90
  19   5  -8   35.10    7.00
 -19   5   8   46.80    9.50
  17  -5  -8   41.80    6.30
 -17  -5   8   41.50    9.40
  17   5  -8   37.00    6.80
 -17   5   8   33.80    8.40
 -15  -5   8   20.60    6.90
  15  -5  -8    8.70    3.80
 -15   5   8   11.90    6.40
  15   5  -8   19.80    5.40
  13  -5  -8   38.20    4.80
 -13  -5   8   35.50    7.50
 -13   5   8   44.10    8.60
  13   5  -8   42.70    6.60
 -13   5   8   32.00    4.70
 -11  -5   8   32.50    6.50
 -11  -5   8   26.20    4.80
  11  -5  -8   29.00    3.80
 -11   5   8   28.70    6.60
  11   5  -8   38.60    6.50
 -11   5   8   26.10    4.20
  11   5  -8   39.20    4.90
   9  -5  -8    7.50    2.20
  -9  -5   8    3.60    4.30
  -9  -5   8    6.10    3.60
  -9   5   8    5.00    3.00
  -9   5   8    6.50    5.00
   9   5  -8    7.20    2.60
   9   5  -8   10.10    4.00
  -7  -5   8   14.00    4.20
  -7  -5   8   17.70    4.80
   7   5  -8   15.40    3.30
  -7   5   8   16.00    3.50
  -7   5   8   13.70    5.20
   7   5  -8   18.00    4.70
  -5  -5   8   15.40    4.50
  -5  -5   8   21.20    4.80
  -5   5   8   15.30    3.80
  -5   5   8   19.50    5.00
   5   5  -8   13.00    4.30
   5   5  -8   19.10    3.60
   3  -5  -8   11.60    4.90
  -3  -5   8    8.70    4.90
  -3  -5   8   14.80    4.30
   3   5  -8   10.50    3.50
  -3   5   8   13.80    4.50
  -3   5   8   21.40    4.20
   3   5  -8   10.40    4.10
  -1  -5   8   24.00    6.20
   1  -5  -8   16.60    5.30
  -1  -5   8   31.50    5.30
  -1   5   8   27.20    4.70
  -1   5   8   25.80    5.50
   1   5  -8   33.80    6.40
   1   5  -8   17.80    4.20
   1  -5   8   24.10    7.00
  -1  -5  -8   19.60    6.60
   1  -5   8   20.60    4.60
  -1   5  -8   25.90    6.40
  -1   5  -8   19.60    4.70
   1   5   8   25.20    5.90
   1   5   8   19.90    5.10
   3  -5   8   27.00    6.70
  -3  -5  -8   31.00    7.50
   3  -5   8   27.20    5.10
  -3   5  -8   48.40    8.20
   3   5   8   24.40    6.00
   3   5   8   29.60    5.80
  -3   5  -8   22.40    4.90
   5  -5   8   41.30    8.30
   5  -5   8   44.30    6.00
  -5  -5  -8   33.70    8.00
   5   5   8   41.20    7.00
   5   5   8   27.90    7.20
  -5   5  -8   34.40    7.90
  -5   5  -8   34.90    6.10
   7  -5   8   69.69   11.00
   7  -5   8   72.39    9.40
   7  -5   8   72.89    8.80
  -7  -5  -8   66.99   11.40
   7   5   8   62.89    9.60
  -7   5  -8   74.59   11.50
   7   5   8   95.99   11.40
  -7   5  -8   99.79   11.80
   9  -5   8    9.20    5.30
  -9  -5  -8    5.90    8.20
   9   5   8    0.30    5.60
   9   5   8  -10.70    5.10
  -9   5  -8    6.20    6.80
  -9   5  -8    1.10    5.20
  11  -5   8   -3.80    7.70
  11  -5   8   16.00    6.80
 -11  -5  -8    3.10   10.90
  11   5   8   -3.20    6.50
 -11   5  -8   18.60    8.80
 -11   5  -8    7.60    6.30
 -13  -5  -8   -3.90   11.40
  13  -5   8   27.90    7.70
  13   5   8   -0.20    7.80
 -13   5  -8   27.20    9.90
 -13   5  -8    8.20    7.40
 -15  -5  -8   26.50   14.90
  15  -5   8   36.20    9.40
 -15   5  -8   34.20   11.70
  15   5   8   34.60   11.40
 -15   5  -8   41.50   10.00
 -17  -5  -8    8.30   12.40
  17  -5   8   -0.70    6.70
 -17   5  -8    5.00    7.00
 -17   5  -8   17.00   10.30
 -19  -5  -8   -3.40   11.80
  19  -5   8   -0.70    7.30
  26  -6  -8   31.20    8.40
 -26  -6   8   13.90   11.00
  26   6  -8   38.60    9.20
 -24  -6   8    0.10    9.20
  24  -6  -8    4.20    5.60
  24   6  -8    0.50    5.40
 -22  -6   8    9.70   10.00
  22  -6  -8   16.50    5.80
 -22   6   8   12.40    8.10
  22   6  -8   15.90    6.40
 -20  -6   8   16.70    9.80
  20  -6  -8   37.60    6.70
 -20   6   8   30.60    8.70
  20   6  -8   31.10    7.00
 -18  -6   8  209.48   20.70
  18  -6  -8  224.78   12.40
  18   6  -8  216.78   15.00
 -18   6   8  252.87   19.70
 -16  -6   8  484.25   26.60
  16  -6  -8  427.96   15.80
  16   6  -8  417.36   19.20
 -16   6   8  459.35   24.40
  14  -6  -8  124.79    8.20
 -14  -6   8  156.48   15.80
  14   6  -8  147.39   12.10
 -14   6   8  132.19   16.10
 -12  -6   8  141.49   14.40
  12  -6  -8  148.49    8.20
 -12   6   8  158.28    8.80
 -12   6   8  130.09   15.30
  12   6  -8  169.78   12.50
 -10  -6   8   13.80    4.50
  10  -6  -8   16.80    3.30
 -10  -6   8   21.00    6.10
 -10   6   8   10.60    6.00
  10   6  -8   18.90    3.50
 -10   6   8   20.90    4.20
  10   6  -8   20.80    6.10
   8  -6  -8  145.79   10.50
  -8  -6   8  142.99   11.50
  -8  -6   8  131.19   12.40
  -8   6   8  119.39    8.70
  -8   6   8  152.78   14.00
   8   6  -8  135.69   11.50
   8   6  -8  145.79    8.90
   6  -6  -8  246.78   14.10
  -6  -6   8  225.48   14.50
  -6  -6   8  252.77   14.90
   6   6  -8  226.78   13.80
  -6   6   8  234.88   11.60
   6   6  -8  232.58   11.60
  -6   6   8  240.98   15.80
   4  -6  -8   99.69   10.30
  -4  -6   8  115.09   11.50
  -4  -6   8  116.79   10.40
  -4   6   8  100.79   11.50
  -4   6   8  103.69    8.40
   4   6  -8  108.69   10.20
   4   6  -8  122.09    9.00
  -2  -6   8  230.58   15.60
  -2  -6   8  225.68   13.20
   2  -6  -8  236.28   15.50
   2   6  -8  231.48   14.30
  -2   6   8  221.98   14.90
   2   6  -8  228.08   12.80
  -2   6   8  237.18   12.20
   0  -6  -8   24.70    7.00
   0  -6   8   31.90    5.40
   0  -6   8   23.40    6.80
   0   6   8   18.40    5.00
   0   6  -8   13.60    4.40
   0   6  -8   25.70    6.50
   0   6   8   23.70    6.00
   2  -6   8  102.99    9.20
   2  -6   8  101.29   12.60
  -2  -6  -8   83.59   11.80
   2   6   8   97.09   10.50
  -2   6  -8  117.59   12.50
   2   6   8  113.29   11.40
  -2   6  -8  105.49   11.00
   4  -6   8  128.89   10.20
  -4  -6  -8  128.29   15.70
   4  -6   8  112.79   14.20
  -4   6  -8  164.28   15.00
   4   6   8  133.39   12.20
   4   6   8  145.69   12.80
  -4   6  -8  134.69   12.30
  -6  -6  -8  260.07   21.00
   6  -6   8  196.08   19.90
   6  -6   8  276.97   20.10
   6   6   8  276.87   17.00
   6   6   8  261.67   16.80
  -6   6  -8  224.08   18.50
  -6   6  -8  263.27   17.10
   8  -6   8  543.65   29.70
   8  -6   8  581.54   24.20
  -8  -6  -8  557.34   32.60
  -8   6  -8  531.65   27.90
  -8   6  -8  626.34   26.70
   8   6   8  577.34   25.30
   8   6   8  580.54   25.60
 -10  -6  -8    1.20    9.10
  10  -6   8   10.40    7.10
  10  -6   8    2.90    7.10
  10   6   8   11.00    7.40
 -10   6  -8   -0.70    5.00
 -10   6  -8    4.60    8.60
 -12  -6  -8   13.30   12.40
  12  -6   8   28.60    8.30
  12   6   8   20.70    9.00
 -12   6  -8   21.90    7.90
 -12   6  -8   18.20   10.10
  14  -6   8   23.10    8.30
 -14  -6  -8    3.10   13.20
 -14   6  -8   27.90   11.00
  14   6   8   11.20    9.70
 -14   6  -8   14.40    8.10
  16  -6   8    9.40    7.40
 -16  -6  -8   -6.10   11.20
 -16   6  -8    7.50   10.00
 -16   6  -8   -6.00    6.30
  18  -6   8    3.80    8.30
 -18  -6  -8    6.80   12.80
 -18   6  -8   -0.90    7.10
 -18   6  -8   14.80   11.50
 -25  -7   8   16.00   11.40
  25  -7  -8   -1.20    6.20
  25   7  -8    8.50    7.00
  23  -7  -8    5.30    5.80
 -23  -7   8   -1.60    9.30
 -23   7   8   -2.20    7.70
  23   7  -8   -5.00    5.00
 -21  -7   8   90.49   16.80
  21  -7  -8   71.29    8.70
  21   7  -8   73.79   10.50
 -21   7   8   71.19   12.20
  19  -7  -8  531.85   19.50
 -19  -7   8  513.55   31.70
 -19   7   8  571.04   30.10
  19   7  -8  571.04   23.70
 -17  -7   8  678.73   34.60
  17  -7  -8  675.63   21.30
 -17   7   8  673.03   32.10
  17   7  -8  685.63   26.10
 -15  -7   8  598.04   31.10
  15  -7  -8  653.93   19.60
 -15   7   8  687.33   30.90
  15   7  -8  599.54   24.20
 -13  -7   8  627.94   30.40
  13  -7  -8  597.04   17.90
 -13   7   8  563.04   22.20
  13   7  -8  630.44   24.10
 -13   7   8  658.53   29.80
 -11  -7   8  343.27   21.50
  11  -7  -8  336.27   11.90
  11   7  -8  367.16   18.10
 -11   7   8  366.56   22.50
 -11   7   8  292.87   16.30
  -9  -7   8   -3.20    4.20
   9  -7  -8    8.50    4.20
  -9  -7   8   21.40    6.50
   9   7  -8   10.90    5.10
  -9   7   8    2.00    5.70
   9   7  -8    6.30    3.00
  -9   7   8    0.10    3.10
   7  -7  -8  259.27   15.20
  -7  -7   8  257.77   15.80
  -7  -7   8  238.78   16.30
  -7   7   8  241.88   17.80
  -7   7   8  253.57   12.30
   7   7  -8  254.57   12.70
   7   7  -8  226.18   14.70
  -5  -7   8  421.26   20.80
  -5  -7   8  423.76   20.30
   5  -7  -8  411.46   20.40
   5   7  -8  435.66   20.00
  -5   7   8  426.06   21.80
  -5   7   8  416.76   16.60
   5   7  -8  429.66   17.30
  -3  -7   8  329.27   17.10
  -3  -7   8  315.07   18.50
   3  -7  -8  311.97   18.40
  -3   7   8  312.47   15.00
   3   7  -8  313.67   17.40
  -3   7   8  318.77   18.50
   3   7  -8  317.97   15.40
  -1  -7   8    5.80    3.90
   1  -7  -8   10.30    5.30
  -1  -7   8    1.40    3.90
  -1   7   8    3.80    4.70
   1   7  -8    3.90    3.50
   1   7  -8   -5.60    4.20
  -1   7   8    1.70    3.50
   1  -7   8  168.58   11.60
  -1  -7  -8  175.98   16.00
   1  -7   8  185.88   15.90
  -1   7  -8  150.78   14.10
   1   7   8  161.78   12.10
   1   7   8  161.38   13.80
  -1   7  -8  158.68   12.80
   3  -7   8  445.56   24.40
  -3  -7  -8  468.15   26.10
   3  -7   8  449.06   18.30
   3   7   8  440.16   21.00
  -3   7  -8  442.86   21.20
   3   7   8  465.25   20.90
  -3   7  -8  445.86   23.00
  -5  -7  -8  965.60   40.50
   5  -7   8  937.91   37.50
   5   7   8  953.90   32.70
  -5   7  -8  989.60   36.30
  -5   7  -8  942.91   33.30
   5   7   8  950.40   32.60
  -7  -7  -8  967.40   42.40
   7   7   8  890.11   32.70
   7   7   8  913.71   33.50
  -7   7  -8  959.50   34.70
  -7   7  -8  866.11   35.80
  -9  -7  -8  245.98   26.00
   9  -7   8  327.67   19.30
  -9   7  -8  307.67   21.00
   9   7   8  298.37   20.90
  -9   7  -8  313.57   23.40
 -11  -7  -8   34.80   13.30
  11  -7   8   34.80    9.30
 -11   7  -8   35.60    9.30
  11   7   8   30.70    9.40
 -11   7  -8   46.10   13.00
 -13  -7  -8    4.70   12.20
  13  -7   8    0.20    7.10
 -13   7  -8    2.00    9.30
  13   7   8    5.00    8.20
 -13   7  -8   -0.80    6.40
 -15  -7  -8   -9.50   10.70
  15  -7   8    6.00    7.30
 -15   7  -8   -9.20    9.70
 -15   7  -8    3.70    7.10
  17  -7   8   -3.60    7.10
 -17  -7  -8   11.90   14.40
 -17   7  -8    6.90    8.70
 -17   7  -8    8.40   11.70
  24  -8  -8   -5.50    5.50
 -24  -8   8   -7.80    9.70
  24   8  -8    0.80    6.30
 -24   8   8  -18.10    7.50
 -24   8   8   -6.10    8.10
  22  -8  -8   24.70    6.90
 -22  -8   8   14.10   10.90
 -22   8   8   12.40    9.60
  22   8  -8   26.40    7.90
 -22   8   8   20.60    9.60
  20  -8  -8  155.68   12.00
 -20  -8   8   96.49   17.10
 -20   8   8  145.19   15.80
 -20   8   8   98.69   15.00
  20   8  -8  136.99   14.40
 -18  -8   8  342.17   27.10
  18  -8  -8  361.66   15.70
 -18   8   8  358.66   21.70
 -18   8   8  365.86   26.70
  18   8  -8  342.97   19.30
  16  -8  -8  195.38   13.00
 -16  -8   8  204.48   21.70
 -16   8   8  194.58   21.10
  16   8  -8  195.58   15.60
 -14  -8   8 1097.99   43.70
 -14   8   8 1195.88   43.20
  14   8  -8 1020.50   34.70
 -12  -8   8    6.60    7.80
 -12   8   8   38.00   10.00
  12   8  -8    7.10    6.50
 -10  -8   8   45.90   10.10
  10   8  -8   41.10    8.30
 -10   8   8   44.30   10.10
   8  -8  -8    9.20    4.50
  -8  -8   8    7.10    5.80
   8   8  -8    3.50    3.30
  -8   8   8    8.60    3.60
  -8   8   8    0.70    5.70
   8   8  -8    7.70    5.20
  -6  -8   8    8.80    5.30
   6  -8  -8   20.10    5.70
   6   8  -8   12.90    4.10
   6   8  -8   12.50    5.70
  -6   8   8   22.50    4.90
  -6   8   8   14.70    6.70
  -4  -8   8   54.09    8.60
   4  -8  -8   68.69   10.10
  -4   8   8   57.59    7.50
   4   8  -8   50.49    8.80
  -4   8   8   75.19   11.20
   4   8  -8   78.99    9.30
  -2  -8   8    3.20    4.60
   2  -8  -8    8.90    5.80
  -2   8   8   10.70    4.90
   2   8  -8    2.20    6.20
  -2   8   8    9.80    5.60
   2   8  -8    7.40    4.40
   0  -8   8  105.19   11.40
   0  -8  -8   87.49   12.50
   0   8   8   99.39   11.40
   0   8   8  110.79   13.50
   0   8  -8  105.89   11.80
   0   8  -8  100.89   13.00
   2  -8   8  220.48   14.20
  -2  -8  -8  216.68   20.30
   2   8   8  240.58   16.20
   2   8   8  232.28   16.90
  -2   8  -8  206.18   17.50
  -2   8  -8  233.98   16.50
  -4  -8  -8  719.33   35.90
  -4   8  -8  823.42   31.00
   4   8   8  736.33   29.10
  -4   8  -8  710.53   31.30
   4   8   8  801.02   29.80
  -6  -8  -8  486.65   31.30
   6   8   8  436.26   23.70
  -6   8  -8  440.06   26.10
   6   8   8  406.06   22.30
  -6   8  -8  490.25   24.90
  -8  -8  -8   34.70   13.30
  -8   8  -8   37.30    8.40
  -8   8  -8   42.80   10.90
   8   8   8   38.40    9.80
 -10  -8  -8   45.30   15.00
  10  -8   8   57.49   10.60
  10   8   8   36.50   10.80
 -10   8  -8   52.29   10.70
 -10   8  -8   64.19   13.90
 -12  -8  -8  -16.90   10.70
  12  -8   8    9.30    8.50
  12   8   8    5.10    8.90
 -12   8  -8   26.90   13.20
 -12   8  -8    4.40    7.30
 -14  -8  -8   16.10   14.10
  14  -8   8    5.80    8.80
 -14   8  -8    8.10   11.60
 -14   8  -8    6.70    8.70
  16  -8   8  -10.30    8.00
 -16  -8  -8    3.00   13.00
 -16   8  -8   -4.70    7.70
 -16   8  -8    0.70   11.80
 -23  -9   8    5.40   11.40
 -23   9   8    0.80   10.00
  23   9  -8    9.90    7.10
 -21  -9   8   28.00   13.30
 -21   9   8   36.20   12.20
  21   9  -8   40.00    9.00
 -19  -9   8   11.00   10.00
  19   9  -8    2.40    6.10
 -19   9   8   -8.80    8.30
 -17  -9   8   16.60    9.90
  17   9  -8    7.40    5.80
 -17   9   8   -0.80    8.70
 -15  -9   8   54.79   11.90
  15   9  -8   65.59   10.50
 -15   9   8   66.09   13.30
 -13  -9   8  118.49   16.90
 -13   9   8  195.48   21.10
  13   9  -8  135.39   14.70
 -11  -9   8   13.30    8.20
  11   9  -8   21.90    9.10
 -11   9   8   32.30    9.30
  -9  -9   8   63.39   11.60
  -9   9   8   73.69   12.00
   9   9  -8   67.69   11.70
   7  -9  -8  323.47   19.10
  -7  -9   8  309.67   21.60
  -7   9   8  361.26   23.70
  -7   9   8  348.97   15.90
   7   9  -8  346.07   17.30
   7   9  -8  329.87   20.00
  -5  -9   8  235.58   18.10
   5  -9  -8  222.08   17.20
  -5   9   8  261.47   20.20
   5   9  -8  236.98   15.10
  -5   9   8  250.57   14.30
   5   9  -8  236.38   17.60
  -3  -9   8  435.66   22.50
   3  -9  -8  419.06   23.70
  -3   9   8  462.85   25.50
   3   9  -8  440.66   20.80
  -3   9   8  451.65   19.70
   3   9  -8  431.06   22.60
   1  -9  -8  320.77   22.70
  -1  -9   8  316.87   18.80
  -1   9   8  319.47   18.00
   1   9  -8  323.97   20.70
   1   9  -8  339.17   19.10
  -1   9   8  341.67   21.80
   1  -9   8  375.46   19.00
  -1  -9  -8  357.66   25.50
   1   9   8  362.96   20.40
   1   9   8  355.36   22.50
  -1   9  -8  376.96   20.80
  -1   9  -8  361.26   22.30
  -3  -9  -8  301.17   26.00
   3   9   8  259.57   19.40
   3   9   8  301.67   19.90
  -3   9  -8  327.47   20.30
  -3   9  -8  271.37   20.40
  -5  -9  -8   94.49   16.50
  -5   9  -8   93.89   14.40
  -5   9  -8  118.79   14.90
   5   9   8   87.49   11.80
   5   9   8   79.49   12.10
  -7  -9  -8   -7.30    8.70
  -7   9  -8   -4.20    7.80
   7   9   8    5.00    7.00
  -7   9  -8    9.10    6.10
  -9  -9  -8    8.70   11.50
   9   9   8   -0.70    6.90
  -9   9  -8  -19.00    8.40
  -9   9  -8    1.20    6.80
 -11  -9  -8   43.60   15.80
 -11   9  -8   20.40   11.40
 -11   9  -8   36.60   11.10
  13  -9   8   53.89   12.20
 -13  -9  -8   48.60   17.20
 -13   9  -8   47.50   14.20
 -13   9  -8   33.40   10.90
 -15  -9  -8   11.00   14.30
  15  -9   8    9.00    9.80
 -15   9  -8    3.50    8.70
 -15   9  -8    6.30   12.30
 -20 -10   8  -16.10    9.10
 -20  10   8    1.60   10.40
  20  10  -8    0.80    6.60
 -18 -10   8    3.90    9.70
 -18  10   8   -1.90   10.00
  18  10  -8    8.60    6.30
 -16 -10   8   30.20   11.30
  16  10  -8   29.30    8.40
 -16  10   8   30.50   12.00
 -14 -10   8    8.20    8.10
 -14  10   8   15.80   10.00
  14  10  -8    4.90    6.60
 -12 -10   8   34.70   10.20
  12  10  -8   17.60    8.10
 -12  10   8   32.80   10.10
 -10 -10   8  105.59   15.00
  10  10  -8  107.69   13.60
 -10  10   8  113.59   15.70
  -8 -10   8  159.38   18.40
   8  10  -8  146.79   16.00
  -8  10   8  195.68   21.40
   6 -10  -8  904.71   36.70
  -6 -10   8  903.31   37.50
  -6  10   8 1000.60   31.10
   6  10  -8  942.11   32.60
  -6  10   8 1066.39   40.80
   6  10  -8  960.70   35.20
  -4 -10   8  708.83   31.50
   4 -10  -8  745.63   33.50
  -4  10   8  774.42   27.80
  -4  10   8  845.82   36.10
   4  10  -8  792.92   31.80
   4  10  -8  781.82   29.50
  -2 -10   8  620.74   28.40
   2 -10  -8  682.43   32.80
  -2  10   8  659.73   26.40
   2  10  -8  709.13   28.50
   2  10  -8  656.53   29.50
  -2  10   8  699.53   33.00
   0 -10  -8  415.56   27.60
   0  10   8  422.16   22.20
   0  10  -8  453.85   23.60
   0  10   8  445.26   26.00
   0  10  -8  441.06   24.70
  -2 -10  -8   82.19   15.50
   2  10   8   64.19   11.90
  -2  10  -8   60.59   11.70
   2  10   8   53.89   10.10
  -2  10  -8   59.89   10.60
  -4 -10  -8   -2.20    9.10
  -4  10  -8    4.70    6.00
   4  10   8   -5.60    5.50
  -4  10  -8    7.70    8.00
   4  10   8    6.50    7.30
  -6 -10  -8    6.50   10.20
  -6  10  -8   14.50    9.30
   6  10   8    9.00    7.90
  -6  10  -8   19.60    7.50
  -8 -10  -8   64.19   17.30
  -8  10  -8   53.89   13.10
  -8  10  -8   49.20   10.70
 -10 -10  -8   -6.20   10.90
 -10  10  -8    4.20    8.20
 -10  10  -8   -9.10   10.40
 -12 -10  -8   45.70   17.50
 -12  10  -8   25.70   13.40
 -12  10  -8   22.60   10.40
 -19 -11   8  -16.30    8.90
  19  11  -8   -5.50    5.90
 -19  11   8  -21.20    8.10
 -17 -11   8   26.60   12.10
 -17  11   8   29.70   13.50
  17  11  -8   34.80    9.20
 -15 -11   8   -2.90    9.00
 -15  11   8   -2.10    9.90
  15  11  -8    3.60    6.80
 -13 -11   8   -4.40    8.30
 -13  11   8   -6.10    8.30
  13  11  -8    7.40    7.70
 -11 -11   8   57.99   13.10
  11  11  -8   73.69   12.60
 -11  11   8   57.09   13.30
  -9 -11   8  235.78   21.80
   9  11  -8  214.18   19.00
  -9  11   8  255.07   24.80
  -7 -11   8  489.65   28.30
  -7  11   8  550.14   32.20
   7  11  -8  457.65   25.50
  -5 -11   8  528.55   28.60
   5  11  -8  559.74   25.70
   5  11  -8  572.34   28.10
  -5  11   8  632.94   33.60
  -3 -11   8  411.86   24.60
   3 -11  -8  386.56   27.10
   3  11  -8  413.06   22.70
  -3  11   8  433.86   22.10
  -3  11   8  454.55   29.20
   3  11  -8  409.36   24.70
   1 -11  -8  463.85   30.20
  -1  11   8  447.26   23.60
   1  11  -8  437.56   24.10
   1  11  -8  479.85   26.20
  -1  11   8  430.26   28.10
  -1 -11  -8    4.80    9.00
  -1  11  -8   20.90    9.00
   1  11   8    4.90    6.70
   1  11   8   17.20    8.50
  -1  11  -8   25.30    7.60
  -3 -11  -8   10.90    9.40
  -3  11  -8   -2.20    7.60
  -3  11  -8   -3.40    5.50
   3  11   8   -3.80    6.20
   3  11   8   -3.80    6.00
  -5 -11  -8   18.10   10.80
  -5  11  -8   14.00    9.00
  -5  11  -8   11.60    7.40
  -7 -11  -8   10.20   11.40
  -7  11  -8   21.70    9.80
  -7  11  -8   21.40   10.70
  -9 -11  -8    8.30   12.90
  -9  11  -8   -4.90    9.70
  -9  11  -8   -2.40    8.50
 -11 -11  -8   34.10   17.10
 -11  11  -8   28.40   11.00
 -11  11  -8   14.60   13.00
 -16 -12   8    7.20   12.60
 -16  12   8    3.00   11.20
  16  12  -8   11.20    7.70
 -14 -12   8   -8.20   10.60
 -14  12   8    0.10   12.60
  14  12  -8    5.80    7.60
 -12 -12   8   28.50   12.30
 -12  12   8   41.70   13.70
  12  12  -8   32.60   10.20
 -10 -12   8   61.49   13.40
  10  12  -8  112.49   15.40
 -10  12   8  118.79   18.10
  -8 -12   8  173.78   20.10
  -8  12   8  216.98   24.60
   8  12  -8  156.68   17.90
  -6 -12   8   92.39   14.10
   6  12  -8   99.29   14.90
  -6  12   8  103.09   16.80
  -4 -12   8   64.99   11.60
   4  12  -8   52.99    9.40
   4  12  -8   36.80   10.00
  -4  12   8   38.60   11.20
   2 -12  -8   39.30   11.20
  -2  12   8   24.80   10.70
   2  12  -8   37.80   10.70
   2  12  -8   36.40    8.20
   0 -12  -8   20.10   10.70
   0  12  -8   31.40    8.30
   0  12   8   27.60    9.60
   0  12  -8   33.00   10.30
  -2 -12  -8   13.60   10.50
   2  12   8   11.00    8.90
  -2  12  -8   10.70    7.30
  -2  12  -8    8.40    8.70
  -4 -12  -8   14.70   10.90
  -4  12  -8   12.10    8.00
  -4  12  -8   23.10   11.00
  -6 -12  -8   23.20   13.20
  -6  12  -8   -1.90    7.60
  -6  12  -8   15.40   10.80
  -8 -12  -8   46.40   16.70
  -8  12  -8   29.60   11.00
  -8  12  -8   23.30   12.00
 -13 -13   8   33.00   13.10
  13  13  -8   37.90   10.80
 -13  13   8   83.59   18.30
 -11 -13   8   24.20   11.70
 -11  13   8   40.40   14.50
  11  13  -8   53.29   12.30
  -9 -13   8    1.00    8.90
  -9  13   8    5.70   10.70
   9  13  -8    1.10    7.70
  -7 -13   8   -5.80    7.90
   7  13  -8  -11.70    6.90
  -7  13   8    2.60    9.80
   5  13  -8   49.70   11.60
  -5  13   8   48.30   13.20
   3  13  -8   -0.50    8.10
  -3  13   8    6.20    9.00
   3  13  -8    7.10    6.40
   1 -13  -8   20.00   11.50
  -1  13   8    3.40    9.30
   1  13  -8    9.80    7.10
   1  13  -8   10.30   10.20
  -1 -13  -8   17.20   10.80
   1  13   8   22.50   11.00
[truncated: 301,974 more chars]
