# Supplementary material
Source: publisher figshare collection journal article supplement (https://acs.figshare.com/ndownloader/files/22494656)
Supplement: Supplementary file 1 [file 22494656 › CIF/1W.cif]

data_1w
_audit_creation_date               2019-03-12
_audit_creation_method
;
Olex2 1.2
(compiled 2018.05.29 svn.r3508 for OlexSys, GUI svn.r5506)
;
_shelx_SHELXL_version_number       '2016/6'
_audit_contact_author_address      ?
_audit_contact_author_email        ?
_audit_contact_author_name         ''
_audit_contact_author_phone        ?
_publ_contact_author_id_orcid      ?
_publ_section_references
;
Dolomanov, O.V., Bourhis, L.J., Gildea, R.J, Howard, J.A.K. & Puschmann, H.
 (2009), J. Appl. Cryst. 42, 339-341.

Sheldrick, G.M. (2008). Acta Cryst. A64, 112-122.
;
_chemical_name_common              ?
_chemical_name_systematic          ?
_chemical_formula_moiety           'C44 H34 Cu2 I2 N6 O2, 2(C6 H7 N)'
_chemical_formula_sum              'C56 H48 Cu2 I2 N8 O2'
_chemical_formula_weight           1245.90
_chemical_melting_point            ?
loop_
  _atom_type_symbol
  _atom_type_description
  _atom_type_scat_dispersion_real
  _atom_type_scat_dispersion_imag
  _atom_type_scat_source
 'C' 'C' 0.0033 0.0016 'International Tables Vol C Tables 4.2.6.8 and 6.1.1.4'
 'H' 'H' 0.0000 0.0000 'International Tables Vol C Tables 4.2.6.8 and 6.1.1.4'
 'Cu' 'Cu' 0.3201 1.2651 'International Tables Vol C Tables 4.2.6.8 and 6.1.1.4'
 'I' 'I' -0.4742 1.8119 'International Tables Vol C Tables 4.2.6.8 and 6.1.1.4'
 'N' 'N' 0.0061 0.0033 'International Tables Vol C Tables 4.2.6.8 and 6.1.1.4'
 'O' 'O' 0.0106 0.0060 'International Tables Vol C Tables 4.2.6.8 and 6.1.1.4'

_shelx_space_group_comment
;
The symmetry employed for this shelxl refinement is uniquely defined
by the following loop, which should always be used as a source of
symmetry information in preference to the above space-group names.
They are only intended as comments.
;
_space_group_crystal_system        'triclinic'
_space_group_IT_number             2
_space_group_name_H-M_alt          'P -1'
_space_group_name_Hall             '-P 1'
loop_
  _space_group_symop_operation_xyz
 'x, y, z'
 '-x, -y, -z'

_cell_length_a                     12.5064(12)
_cell_length_b                     13.6759(12)
_cell_length_c                     17.5120(16)
_cell_angle_alpha                  109.965(4)
_cell_angle_beta                   89.613(4)
_cell_angle_gamma                  114.963(4)
_cell_volume                       2518.8(4)
_cell_formula_units_Z              2
_cell_measurement_reflns_used      9974
_cell_measurement_temperature      100(2)
_cell_measurement_theta_max        25.36
_cell_measurement_theta_min        2.37
_shelx_estimated_absorpt_T_max     0.484
_shelx_estimated_absorpt_T_min     0.449
_exptl_absorpt_coefficient_mu      2.121
_exptl_absorpt_correction_T_max    0.745211
_exptl_absorpt_correction_T_min    0.486962
_exptl_absorpt_correction_type     multi-scan
_exptl_absorpt_process_details
;
 TWINABS-2012/1 (Bruker,2012) was used for absorption correction.

Final HKLF 4 output contains 37291 reflections, Rint = 0.0545
 (24792 with I > 3sig(I), Rint = 0.0504)
;
_exptl_absorpt_special_details     ?
_exptl_crystal_colour              'clear dark brown'
_exptl_crystal_colour_lustre       clear
_exptl_crystal_colour_modifier     dark
_exptl_crystal_colour_primary      brown
_exptl_crystal_density_diffrn      1.643
_exptl_crystal_density_meas        ?
_exptl_crystal_density_method      ?
_exptl_crystal_description         block
_exptl_crystal_F_000               1240
_exptl_crystal_size_max            0.45
_exptl_crystal_size_mid            0.4
_exptl_crystal_size_min            0.4
_exptl_transmission_factor_max     ?
_exptl_transmission_factor_min     ?
_diffrn_reflns_av_R_equivalents    ?
_diffrn_reflns_av_unetI/netI       0.0523
_diffrn_reflns_Laue_measured_fraction_full  0.991
_diffrn_reflns_Laue_measured_fraction_max  0.990
_diffrn_reflns_limit_h_max         15
_diffrn_reflns_limit_h_min         -15
_diffrn_reflns_limit_k_max         15
_diffrn_reflns_limit_k_min         -16
_diffrn_reflns_limit_l_max         21
_diffrn_reflns_limit_l_min         0
_diffrn_reflns_number              8943
_diffrn_reflns_point_group_measured_fraction_full  0.991
_diffrn_reflns_point_group_measured_fraction_max  0.990
_diffrn_reflns_theta_full          25.242
_diffrn_reflns_theta_max           25.371
_diffrn_reflns_theta_min           2.037
_diffrn_ambient_temperature        100.0
_diffrn_detector_area_resol_mean   ?
_diffrn_measured_fraction_theta_full  0.991
_diffrn_measured_fraction_theta_max  0.990
_diffrn_measurement_device_type    'Bruker APEX-II CCD'
_diffrn_measurement_method         '\f and \w scans'
_diffrn_radiation_type             MoK\a
_diffrn_radiation_wavelength       0.71073
_diffrn_source                     ?
_reflns_Friedel_coverage           0.000
_reflns_Friedel_fraction_full      .
_reflns_Friedel_fraction_max       .
_reflns_number_gt                  7041
_reflns_number_total               8943
_reflns_special_details
;
 _reflns_Friedel_fraction is defined as the number of unique
 Friedel pairs measured divided by the number that would be
 possible theoretically, ignoring centric projections and
 systematic absences.
;
_reflns_threshold_expression       'I > 2\s(I)'
_computing_cell_refinement         'SAINT V8.38A (?, 2016)'
_computing_data_collection         ?
_computing_data_reduction          'SAINT V8.38A (?, 2016)'
_computing_molecular_graphics      'Olex2 (Dolomanov et al., 2009)'
_computing_publication_material    'Olex2 (Dolomanov et al., 2009)'
_computing_structure_refinement    'XL (Sheldrick, 2008)'
_computing_structure_solution      'ShelXS (Sheldrick, 2008)'
_refine_diff_density_max           1.435
_refine_diff_density_min           -1.455
_refine_diff_density_rms           0.176
_refine_ls_extinction_coef         .
_refine_ls_extinction_method       none
_refine_ls_goodness_of_fit_ref     1.109
_refine_ls_hydrogen_treatment      constr
_refine_ls_matrix_type             full
_refine_ls_number_parameters       636
_refine_ls_number_reflns           8943
_refine_ls_number_restraints       0
_refine_ls_R_factor_all            0.0730
_refine_ls_R_factor_gt             0.0477
_refine_ls_restrained_S_all        1.109
_refine_ls_shift/su_max            0.000
_refine_ls_shift/su_mean           0.000
_refine_ls_structure_factor_coef   Fsqd
_refine_ls_weighting_details      
 'w=1/[\s^2^(Fo^2^)+(0.0221P)^2^+13.3524P] where P=(Fo^2^+2Fc^2^)/3'
_refine_ls_weighting_scheme        calc
_refine_ls_wR_factor_gt            0.0973
_refine_ls_wR_factor_ref           0.1148
_refine_special_details
;
 Refined as a 2-component twin.
;
_olex2_refinement_description
;
1. Twinned data refinement
 Scales: 0.5485(13)
 0.4515(13)
2. Fixed Uiso
 At 1.2 times of:
  All C(H) groups, All N(H,H) groups
 At 1.5 times of:
  All C(H,H,H) groups
3.a Rotating group:
 N7(H7A,H7B), N8(H8A,H8B)
3.b Aromatic/amide H refined with riding coordinates:
 C5(H5), C4(H4), C21(H21), C2(H2), C20(H20), C36(H36), C8(H8), C10(H10),
 C1(H1), C35(H35), C37(H37), C34(H34), C19(H19), C22(H22), C16(H16), C32(H32),
 C30(H30), C39(H39), C13(H13), C24(H24), C23(H23), C27(H27), C42(H42), C55(H55),
  C43(H43), C15(H15), C40(H40), C50(H50), C56(H56), C26(H26), C12(H12),
 C49(H49), C47(H47), C53(H53), C52(H52), C45(H45), C54(H54), C46(H46)
3.c Idealised Me refined as rotating group:
 C17(H17A,H17B,H17C), C44(H44A,H44B,H44C)
;
_atom_sites_solution_hydrogens     mixed
_atom_sites_solution_primary       direct
_atom_sites_solution_secondary     ?
loop_
  _atom_site_label
  _atom_site_type_symbol
  _atom_site_fract_x
  _atom_site_fract_y
  _atom_site_fract_z
  _atom_site_U_iso_or_equiv
  _atom_site_adp_type
  _atom_site_occupancy
  _atom_site_site_symmetry_order
  _atom_site_calc_flag
  _atom_site_refinement_flags_posn
  _atom_site_refinement_flags_adp
  _atom_site_refinement_flags_occupancy
  _atom_site_disorder_assembly
  _atom_site_disorder_group
 I1 I 0.59029(5) 0.39857(4) 0.53529(3) 0.02559(13) Uani 1 1 d . . . . .
 I2 I -0.32993(5) -0.43828(4) -0.05909(3) 0.02914(13) Uani 1 1 d . . . . .
 Cu2 Cu -0.43479(9) -0.49627(7) 0.06095(6) 0.0251(2) Uani 1 1 d . . . . .
 Cu1 Cu 0.44090(8) 0.49712(7) 0.56168(6) 0.0253(2) Uani 1 1 d . . . . .
 O2 O 1.1674(5) 1.0360(5) 1.2548(3) 0.0355(14) Uani 1 1 d . . . . .
 N4 N 0.5122(6) 0.6302(5) 0.6732(4) 0.0245(14) Uani 1 1 d . . . . .
 N6 N 0.5821(6) 1.3566(5) 1.0475(4) 0.0226(14) Uani 1 1 d . . . . .
 O1 O -0.5880(6) 0.0853(5) 0.7638(3) 0.0415(15) Uani 1 1 d . . . . .
 N1 N -0.3552(6) -0.3623(5) 0.1711(4) 0.0277(15) Uani 1 1 d . . . . .
 N5 N 0.6362(6) 0.9913(5) 0.9284(4) 0.0218(14) Uani 1 1 d . . . . .
 N3 N 0.2770(6) 0.3618(5) 0.5422(4) 0.0238(14) Uani 1 1 d . . . . .
 N2 N -0.1195(6) 0.0050(5) 0.4217(4) 0.0252(14) Uani 1 1 d . . . . .
 C3 C 0.6167(7) 0.8109(6) 0.8275(4) 0.0202(15) Uani 1 1 d . . . . .
 C5 C 0.5886(7) 0.6281(6) 0.7254(5) 0.0297(18) Uani 1 1 d . . . . .
 H5 H 0.605993 0.563303 0.709492 0.036 Uiso 1 1 calc R . . . .
 C4 C 0.6436(7) 0.7172(5) 0.8020(4) 0.0262(17) Uani 1 1 d . . . . .
 H4 H 0.699083 0.713767 0.836463 0.031 Uiso 1 1 calc R . . . .
 C21 C 0.6488(7) 1.3529(6) 1.1050(4) 0.0268(17) Uani 1 1 d . . . . .
 H21 H 0.675551 1.414958 1.157181 0.032 Uiso 1 1 calc R . . . .
 C2 C 0.5390(7) 0.8134(6) 0.7724(5) 0.0290(18) Uani 1 1 d . . . . .
 H2 H 0.519963 0.877013 0.786555 0.035 Uiso 1 1 calc R . . . .
 C20 C 0.5428(8) 1.2643(6) 0.9748(5) 0.032(2) Uani 1 1 d . . . . .
 H20 H 0.493271 1.262365 0.932867 0.038 Uiso 1 1 calc R . . . .
 C6 C 0.6725(7) 0.9073(6) 0.9087(4) 0.0234(16) Uani 1 1 d . . . . .
 C11 C 0.9078(7) 1.0114(6) 1.0903(4) 0.0235(16) Uani 1 1 d . . . . .
 C36 C -0.4065(7) -0.3697(6) 0.2367(5) 0.0289(18) Uani 1 1 d . . . . .
 H36 H -0.473784 -0.440698 0.230460 0.035 Uiso 1 1 calc R . . . .
 C8 C 0.7737(7) 1.0903(6) 1.0545(4) 0.0201(15) Uani 1 1 d . . . . .
 H8 H 0.807166 1.155234 1.105111 0.024 Uiso 1 1 calc R . . . .
 C33 C -0.2710(7) -0.1765(6) 0.3243(5) 0.0261(17) Uani 1 1 d . . . . .
 C10 C 0.7587(7) 0.9109(6) 0.9596(4) 0.0247(17) Uani 1 1 d . . . . .
 H10 H 0.781025 0.849333 0.943685 0.030 Uiso 1 1 calc R . . . .
 C1 C 0.4900(8) 0.7230(7) 0.6975(5) 0.034(2) Uani 1 1 d . . . . .
 H1 H 0.437306 0.726558 0.660852 0.041 Uiso 1 1 calc R . . . .
 C18 C 0.6460(7) 1.1727(6) 1.0181(4) 0.0207(16) Uani 1 1 d . . . . .
 C9 C 0.8137(7) 1.0047(6) 1.0347(4) 0.0231(16) Uani 1 1 d . . . . .
 C35 C -0.2577(7) -0.2624(6) 0.1825(5) 0.0257(17) Uani 1 1 d . . . . .
 H35 H -0.218145 -0.254662 0.136848 0.031 Uiso 1 1 calc R . . . .
 C38 C -0.3691(7) 0.0424(6) 0.5862(4) 0.0232(16) Uani 1 1 d . . . . .
 C37 C -0.3688(8) -0.2804(6) 0.3145(5) 0.0301(19) Uani 1 1 d . . . . .
 H37 H -0.409266 -0.290807 0.359300 0.036 Uiso 1 1 calc R . . . .
 C34 C -0.2122(7) -0.1697(6) 0.2581(5) 0.0259(17) Uani 1 1 d . . . . .
 H34 H -0.140818 -0.102040 0.263964 0.031 Uiso 1 1 calc R . . . .
 C7 C 0.6861(7) 1.0817(6) 1.0015(4) 0.0231(16) Uani 1 1 d . . . . .
 C25 C 0.0410(7) 0.1885(6) 0.5105(5) 0.0234(17) Uani 1 1 d . . . . .
 C19 C 0.5716(8) 1.1739(6) 0.9591(5) 0.0295(18) Uani 1 1 d . . . . .
 H19 H 0.540614 1.110852 0.907448 0.035 Uiso 1 1 calc R . . . .
 C22 C 0.6808(8) 1.2656(6) 1.0934(5) 0.0306(19) Uani 1 1 d . . . . .
 H22 H 0.727551 1.268222 1.137298 0.037 Uiso 1 1 calc R . . . .
 C16 C 0.9357(7) 0.9192(6) 1.0759(5) 0.0278(17) Uani 1 1 d . . . . .
 H16 H 0.894809 0.850659 1.028317 0.033 Uiso 1 1 calc R . . . .
 C32 C -0.1644(7) 0.1119(6) 0.5477(5) 0.0262(17) Uani 1 1 d . . . . .
 H32 H -0.136187 0.177659 0.597880 0.031 Uiso 1 1 calc R . . . .
 C30 C -0.3175(7) -0.0662(6) 0.4557(5) 0.0281(18) Uani 1 1 d . . . . .
 H30 H -0.397769 -0.125251 0.440263 0.034 Uiso 1 1 calc R . . . .
 C39 C -0.4650(7) -0.0540(6) 0.5912(5) 0.0273(17) Uani 1 1 d . . . . .
 H39 H -0.479369 -0.129284 0.554121 0.033 Uiso 1 1 calc R . . . .
 C41 C -0.5228(7) 0.0644(7) 0.7030(5) 0.0269(17) Uani 1 1 d . . . . .
 C31 C -0.2837(7) 0.0301(6) 0.5296(5) 0.0257(17) Uani 1 1 d . . . . .
 C14 C 1.0822(8) 1.0223(6) 1.1983(5) 0.0316(19) Uani 1 1 d . . . . .
 C51 C 0.9706(8) 0.3652(7) 0.9392(6) 0.038(2) Uani 1 1 d . . . . .
 C13 C 1.0579(7) 1.1165(7) 1.2139(5) 0.036(2) Uani 1 1 d . . . . .
 H13 H 1.100030 1.184964 1.261320 0.044 Uiso 1 1 calc R . . . .
 C24 C 0.1211(7) 0.1750(6) 0.4581(5) 0.0294(18) Uani 1 1 d . . . . .
 H24 H 0.097015 0.106525 0.410136 0.035 Uiso 1 1 calc R . . . .
 C23 C 0.2369(8) 0.2626(6) 0.4765(5) 0.0323(18) Uani 1 1 d . . . . .
 H23 H 0.291123 0.251547 0.440216 0.039 Uiso 1 1 calc R . . . .
 C27 C 0.1995(8) 0.3736(7) 0.5918(5) 0.037(2) Uani 1 1 d . . . . .
 H27 H 0.226147 0.443289 0.639199 0.045 Uiso 1 1 calc R . . . .
 C17 C 1.1965(8) 0.9413(7) 1.2389(5) 0.039(2) Uani 1 1 d . . . . .
 H17A H 1.125794 0.872710 1.238676 0.058 Uiso 1 1 calc GR . . . .
 H17B H 1.260766 0.962352 1.281817 0.058 Uiso 1 1 calc GR . . . .
 H17C H 1.222913 0.923962 1.185121 0.058 Uiso 1 1 calc GR . . . .
 C29 C -0.2340(7) -0.0750(6) 0.4054(4) 0.0225(16) Uani 1 1 d . . . . .
 C28 C -0.0866(7) 0.0983(6) 0.4933(4) 0.0224(16) Uani 1 1 d . . . . .
 C42 C -0.4299(7) 0.1633(7) 0.6970(5) 0.0336(19) Uani 1 1 d . . . . .
 H42 H -0.418347 0.238483 0.732268 0.040 Uiso 1 1 calc R . . . .
 C55 C 1.0417(9) 0.3926(7) 0.8153(6) 0.042(2) Uani 1 1 d . . . . .
 H55 H 1.104011 0.405325 0.783113 0.050 Uiso 1 1 calc R . . . .
 C43 C -0.3545(7) 0.1516(6) 0.6397(5) 0.0315(19) Uani 1 1 d . . . . .
 H43 H -0.291343 0.219526 0.636741 0.038 Uiso 1 1 calc R . . . .
 N7 N 0.9904(8) 0.3527(7) 1.0133(5) 0.058(2) Uani 1 1 d . . . . .
 H7A H 0.955135 0.383813 1.049017 0.070 Uiso 1 1 d GR . . . .
 H7B H 0.961403 0.279792 1.004677 0.070 Uiso 1 1 d GR . . . .
 C15 C 1.0208(7) 0.9238(6) 1.1285(5) 0.0292(18) Uani 1 1 d . . . . .
 H15 H 1.037286 0.858914 1.116723 0.035 Uiso 1 1 calc R . . . .
 C40 C -0.5406(8) -0.0436(7) 0.6487(5) 0.037(2) Uani 1 1 d . . . . .
 H40 H -0.605053 -0.111531 0.650654 0.044 Uiso 1 1 calc R . . . .
 C50 C 0.1652(9) 0.6471(8) 0.6884(6) 0.044(2) Uani 1 1 d . . . . .
 H50 H 0.236895 0.658559 0.716371 0.053 Uiso 1 1 calc R . . . .
 C56 C 1.0611(8) 0.3851(7) 0.8905(5) 0.037(2) Uani 1 1 d . . . . .
 H56 H 1.136734 0.393459 0.909384 0.044 Uiso 1 1 calc R . . . .
 C26 C 0.0820(7) 0.2910(7) 0.5793(5) 0.038(2) Uani 1 1 d . . . . .
 H26 H 0.030266 0.304326 0.617127 0.045 Uiso 1 1 calc R . . . .
 C12 C 0.9733(8) 1.1114(7) 1.1613(5) 0.035(2) Uani 1 1 d . . . . .
 H12 H 0.958389 1.177197 1.172925 0.042 Uiso 1 1 calc R . . . .
 C49 C 0.0615(8) 0.6184(7) 0.7236(6) 0.044(2) Uani 1 1 d . . . . .
 H49 H 0.062838 0.610915 0.775558 0.053 Uiso 1 1 calc R . . . .
 C48 C -0.0428(9) 0.6009(7) 0.6834(6) 0.047(2) Uani 1 1 d . . . . .
 C47 C -0.0408(9) 0.6126(8) 0.6070(7) 0.052(3) Uani 1 1 d . . . . .
 H47 H -0.111835 0.601513 0.578347 0.062 Uiso 1 1 calc R . . . .
 N8 N -0.1469(8) 0.5750(8) 0.7174(6) 0.064(3) Uani 1 1 d . . . . .
 H8A H -0.145043 0.541245 0.750498 0.077 Uiso 1 1 d GR . . . .
 H8B H -0.151250 0.638519 0.744330 0.077 Uiso 1 1 d GR . . . .
 C53 C 0.8449(9) 0.3657(8) 0.8358(6) 0.050(3) Uani 1 1 d . . . . .
 H53 H 0.770692 0.360800 0.817721 0.060 Uiso 1 1 calc R . . . .
 C52 C 0.8629(9) 0.3569(8) 0.9096(7) 0.054(3) Uani 1 1 d . . . . .
 H52 H 0.800243 0.344759 0.941544 0.065 Uiso 1 1 calc R . . . .
 C45 C 0.1649(10) 0.6590(8) 0.6132(6) 0.052(3) Uani 1 1 d . . . . .
 H45 H 0.236098 0.680315 0.589822 0.062 Uiso 1 1 calc R . . . .
 C54 C 0.9343(9) 0.3819(7) 0.7869(6) 0.047(2) Uani 1 1 d . . . . .
 H54 H 0.920856 0.385404 0.734761 0.057 Uiso 1 1 calc R . . . .
 C44 C -0.6884(10) -0.0134(9) 0.7662(7) 0.053(3) Uani 1 1 d . . . . .
 H44A H -0.741202 -0.054776 0.712878 0.080 Uiso 1 1 calc GR . . . .
 H44B H -0.731955 0.011550 0.809416 0.080 Uiso 1 1 calc GR . . . .
 H44C H -0.661559 -0.065273 0.777999 0.080 Uiso 1 1 calc GR . . . .
 C46 C 0.0603(10) 0.6395(8) 0.5730(7) 0.053(3) Uani 1 1 d . . . . .
 H46 H 0.058496 0.644932 0.520421 0.064 Uiso 1 1 calc R . . . .

loop_
  _atom_site_aniso_label
  _atom_site_aniso_U_11
  _atom_site_aniso_U_22
  _atom_site_aniso_U_33
  _atom_site_aniso_U_23
  _atom_site_aniso_U_13
  _atom_site_aniso_U_12
 I1 0.0272(3) 0.0257(2) 0.0250(3) 0.0116(2) 0.0037(2) 0.0111(2)
 I2 0.0290(3) 0.0358(3) 0.0290(3) 0.0182(2) 0.0073(2) 0.0153(2)
 Cu2 0.0322(5) 0.0232(4) 0.0219(5) 0.0082(4) 0.0022(4) 0.0141(4)
 Cu1 0.0236(5) 0.0227(4) 0.0237(5) 0.0086(4) 0.0008(4) 0.0049(4)
 O2 0.034(3) 0.037(3) 0.029(3) 0.011(2) -0.003(3) 0.011(2)
 N4 0.022(3) 0.025(3) 0.026(3) 0.010(3) 0.006(3) 0.010(2)
 N6 0.022(3) 0.020(3) 0.028(3) 0.011(2) 0.003(3) 0.009(2)
 O1 0.048(4) 0.057(4) 0.028(3) 0.016(3) 0.016(3) 0.030(3)
 N1 0.037(4) 0.020(3) 0.025(4) 0.009(3) 0.003(3) 0.011(3)
 N5 0.024(4) 0.025(3) 0.018(3) 0.013(2) 0.000(3) 0.008(2)
 N3 0.024(3) 0.026(3) 0.020(3) 0.009(3) 0.001(3) 0.009(3)
 N2 0.025(4) 0.025(3) 0.022(3) 0.009(3) 0.001(3) 0.008(3)
 C3 0.025(4) 0.023(3) 0.011(3) 0.009(3) 0.003(3) 0.008(3)
 C5 0.042(5) 0.025(4) 0.027(4) 0.016(3) 0.002(4) 0.014(3)
 C4 0.043(5) 0.015(3) 0.016(4) 0.004(3) -0.003(3) 0.010(3)
 C21 0.036(5) 0.032(4) 0.013(4) 0.005(3) 0.003(3) 0.018(3)
 C2 0.029(5) 0.031(4) 0.023(4) 0.002(3) -0.007(3) 0.017(3)
 C20 0.040(5) 0.026(4) 0.024(4) 0.007(3) -0.008(4) 0.010(3)
 C6 0.033(4) 0.020(3) 0.018(4) 0.008(3) 0.006(3) 0.013(3)
 C11 0.024(4) 0.023(3) 0.020(4) 0.010(3) 0.008(3) 0.007(3)
 C36 0.033(4) 0.022(3) 0.018(4) 0.009(3) 0.010(3) 0.000(3)
 C8 0.027(4) 0.022(3) 0.011(3) 0.005(3) 0.000(3) 0.012(3)
 C33 0.033(4) 0.027(4) 0.021(4) 0.012(3) 0.006(3) 0.013(3)
 C10 0.036(5) 0.024(3) 0.015(4) 0.005(3) 0.004(3) 0.017(3)
 C1 0.035(5) 0.036(4) 0.028(4) 0.009(4) 0.000(4) 0.015(4)
 C18 0.024(4) 0.022(3) 0.016(4) 0.009(3) 0.002(3) 0.009(3)
 C9 0.024(4) 0.027(4) 0.017(4) 0.010(3) 0.006(3) 0.010(3)
 C35 0.022(4) 0.030(4) 0.026(4) 0.011(3) 0.010(3) 0.011(3)
 C38 0.023(4) 0.025(3) 0.016(4) 0.004(3) 0.000(3) 0.009(3)
 C37 0.043(5) 0.030(4) 0.014(4) 0.011(3) 0.006(3) 0.011(3)
 C34 0.017(4) 0.026(4) 0.030(4) 0.009(3) 0.006(3) 0.007(3)
 C7 0.029(4) 0.026(3) 0.016(4) 0.009(3) 0.007(3) 0.012(3)
 C25 0.021(4) 0.022(3) 0.023(4) 0.010(3) 0.000(3) 0.005(3)
 C19 0.039(5) 0.028(4) 0.019(4) 0.003(3) -0.003(3) 0.018(3)
 C22 0.051(5) 0.034(4) 0.012(4) 0.008(3) 0.001(4) 0.025(4)
 C16 0.034(4) 0.025(4) 0.018(4) 0.008(3) -0.001(3) 0.008(3)
 C32 0.027(4) 0.022(3) 0.023(4) 0.007(3) -0.002(3) 0.006(3)
 C30 0.029(4) 0.023(3) 0.025(4) 0.008(3) -0.004(3) 0.005(3)
 C39 0.027(4) 0.029(4) 0.022(4) 0.008(3) -0.001(3) 0.010(3)
 C41 0.025(4) 0.042(4) 0.023(4) 0.014(3) 0.002(3) 0.022(3)
 C31 0.030(4) 0.023(3) 0.024(4) 0.010(3) 0.001(3) 0.010(3)
 C14 0.034(5) 0.032(4) 0.023(4) 0.013(3) -0.001(4) 0.008(3)
 C51 0.037(5) 0.028(4) 0.046(5) 0.011(4) 0.011(4) 0.012(3)
 C13 0.031(5) 0.032(4) 0.027(5) -0.007(3) -0.013(4) 0.010(3)
 C24 0.027(4) 0.024(4) 0.022(4) 0.003(3) -0.001(3) 0.002(3)
 C23 0.028(4) 0.037(4) 0.030(4) 0.013(3) 0.016(4) 0.013(3)
 C27 0.031(5) 0.035(4) 0.029(5) 0.001(3) 0.010(4) 0.009(4)
 C17 0.041(5) 0.039(4) 0.035(5) 0.014(4) -0.012(4) 0.017(4)
 C29 0.033(4) 0.026(3) 0.013(3) 0.007(3) 0.002(3) 0.016(3)
 C28 0.020(4) 0.030(4) 0.020(4) 0.013(3) 0.002(3) 0.010(3)
 C42 0.020(4) 0.043(4) 0.031(5) 0.004(4) -0.002(3) 0.015(3)
 C55 0.045(6) 0.044(5) 0.037(5) 0.015(4) 0.007(4) 0.021(4)
 C43 0.018(4) 0.024(4) 0.039(5) 0.005(3) -0.004(3) 0.002(3)
 N7 0.092(7) 0.048(5) 0.041(5) 0.025(4) 0.025(5) 0.031(5)
 C15 0.033(5) 0.023(4) 0.032(4) 0.014(3) 0.002(4) 0.010(3)
 C40 0.039(5) 0.038(4) 0.040(5) 0.023(4) 0.004(4) 0.017(4)
 C50 0.038(5) 0.051(5) 0.040(5) 0.011(4) -0.001(4) 0.022(4)
 C56 0.026(5) 0.034(4) 0.047(5) 0.006(4) 0.000(4) 0.017(3)
 C26 0.024(4) 0.036(4) 0.029(5) -0.005(4) 0.011(4) 0.005(3)
 C12 0.039(5) 0.032(4) 0.035(5) 0.005(3) -0.002(4) 0.022(4)
 C49 0.038(5) 0.043(5) 0.033(5) 0.001(4) -0.006(4) 0.012(4)
 C48 0.041(6) 0.039(5) 0.052(6) 0.006(4) 0.002(5) 0.019(4)
 C47 0.039(6) 0.049(5) 0.062(7) 0.021(5) -0.009(5) 0.014(4)
 N8 0.055(6) 0.059(5) 0.070(7) 0.011(5) 0.012(5) 0.028(4)
 C53 0.036(5) 0.053(6) 0.048(6) 0.005(5) -0.007(5) 0.019(4)
 C52 0.035(6) 0.041(5) 0.061(7) 0.004(5) 0.011(5) 0.007(4)
 C45 0.045(6) 0.057(6) 0.045(6) 0.012(5) 0.003(5) 0.020(5)
 C54 0.050(6) 0.041(5) 0.038(5) 0.008(4) -0.008(5) 0.014(4)
 C44 0.060(7) 0.068(6) 0.056(7) 0.039(5) 0.031(6) 0.038(5)
 C46 0.051(7) 0.049(5) 0.047(6) 0.017(5) -0.004(5) 0.014(5)

_geom_special_details
;
 All esds (except the esd in the dihedral angle between two l.s. planes)
 are estimated using the full covariance matrix.  The cell esds are taken
 into account individually in the estimation of esds in distances, angles
 and torsion angles; correlations between esds in cell parameters are only
 used when they are defined by crystal symmetry.  An approximate (isotropic)
 treatment of cell esds is used for estimating esds involving l.s. planes.
;
loop_
  _geom_bond_atom_site_label_1
  _geom_bond_atom_site_label_2
  _geom_bond_distance
  _geom_bond_site_symmetry_2
  _geom_bond_publ_flag
 I1 Cu1 2.6840(11) 2_666 ?
 I1 Cu1 2.6850(11) . ?
 I2 Cu2 2.6868(12) 2_445 ?
 I2 Cu2 2.6442(11) . ?
 Cu2 Cu2 2.6431(19) 2_445 ?
 Cu2 N6 2.046(6) 1_434 ?
 Cu2 N1 2.035(6) . ?
 Cu1 Cu1 2.6140(19) 2_666 ?
 Cu1 N4 2.037(6) . ?
 Cu1 N3 2.030(6) . ?
 O2 C14 1.367(10) . ?
 O2 C17 1.426(10) . ?
 N4 C5 1.341(10) . ?
 N4 C1 1.342(10) . ?
 N6 C21 1.340(10) . ?
 N6 C20 1.358(9) . ?
 O1 C41 1.363(10) . ?
 O1 C44 1.417(11) . ?
 N1 C36 1.325(10) . ?
 N1 C35 1.343(9) . ?
 N5 C6 1.345(9) . ?
 N5 C7 1.355(9) . ?
 N3 C23 1.334(9) . ?
 N3 C27 1.321(11) . ?
 N2 C29 1.341(10) . ?
 N2 C28 1.357(9) . ?
 C3 C4 1.387(10) . ?
 C3 C2 1.392(10) . ?
 C3 C6 1.484(9) . ?
 C5 H5 0.9500 . ?
 C5 C4 1.395(10) . ?
 C4 H4 0.9500 . ?
 C21 H21 0.9500 . ?
 C21 C22 1.366(11) . ?
 C2 H2 0.9500 . ?
 C2 C1 1.374(10) . ?
 C20 H20 0.9500 . ?
 C20 C19 1.370(11) . ?
 C6 C10 1.378(11) . ?
 C11 C9 1.485(11) . ?
 C11 C16 1.389(11) . ?
 C11 C12 1.412(10) . ?
 C36 H36 0.9500 . ?
 C36 C37 1.398(10) . ?
 C8 H8 0.9500 . ?
 C8 C9 1.399(10) . ?
 C8 C7 1.380(10) . ?
 C33 C37 1.384(10) . ?
 C33 C34 1.378(11) . ?
 C33 C29 1.509(10) . ?
 C10 H10 0.9500 . ?
 C10 C9 1.401(10) . ?
 C1 H1 0.9500 . ?
 C18 C7 1.470(10) . ?
 C18 C19 1.404(11) . ?
 C18 C22 1.392(10) . ?
 C35 H35 0.9500 . ?
 C35 C34 1.393(10) . ?
 C38 C39 1.388(10) . ?
 C38 C31 1.475(11) . ?
 C38 C43 1.399(10) . ?
 C37 H37 0.9500 . ?
 C34 H34 0.9500 . ?
 C25 C24 1.381(12) . ?
 C25 C28 1.500(10) . ?
 C25 C26 1.389(10) . ?
 C19 H19 0.9500 . ?
 C22 H22 0.9500 . ?
 C16 H16 0.9500 . ?
 C16 C15 1.378(11) . ?
 C32 H32 0.9500 . ?
 C32 C31 1.391(11) . ?
 C32 C28 1.381(11) . ?
 C30 H30 0.9500 . ?
 C30 C31 1.400(10) . ?
 C30 C29 1.380(11) . ?
 C39 H39 0.9500 . ?
 C39 C40 1.390(12) . ?
 C41 C42 1.399(11) . ?
 C41 C40 1.379(11) . ?
 C14 C13 1.384(12) . ?
 C14 C15 1.383(10) . ?
 C51 N7 1.403(12) . ?
 C51 C56 1.402(12) . ?
 C51 C52 1.391(14) . ?
 C13 H13 0.9500 . ?
 C13 C12 1.371(12) . ?
 C24 H24 0.9500 . ?
 C24 C23 1.384(11) . ?
 C23 H23 0.9500 . ?
 C27 H27 0.9500 . ?
 C27 C26 1.385(11) . ?
 C17 H17A 0.9800 . ?
 C17 H17B 0.9800 . ?
 C17 H17C 0.9800 . ?
 C42 H42 0.9500 . ?
 C42 C43 1.388(12) . ?
 C55 H55 0.9500 . ?
 C55 C56 1.386(13) . ?
 C55 C54 1.367(14) . ?
 C43 H43 0.9500 . ?
 N7 H7A 0.8601 . ?
 N7 H7B 0.8604 . ?
 C15 H15 0.9500 . ?
 C40 H40 0.9500 . ?
 C50 H50 0.9500 . ?
 C50 C49 1.394(14) . ?
 C50 C45 1.381(14) . ?
 C56 H56 0.9500 . ?
 C26 H26 0.9500 . ?
 C12 H12 0.9500 . ?
 C49 H49 0.9500 . ?
 C49 C48 1.374(13) . ?
 C48 C47 1.400(14) . ?
 C48 N8 1.385(13) . ?
 C47 H47 0.9500 . ?
 C47 C46 1.355(15) . ?
 N8 H8A 0.8607 . ?
 N8 H8B 0.8602 . ?
 C53 H53 0.9500 . ?
 C53 C52 1.367(15) . ?
 C53 C54 1.393(15) . ?
 C52 H52 0.9500 . ?
 C45 H45 0.9500 . ?
 C45 C46 1.367(14) . ?
 C54 H54 0.9500 . ?
 C44 H44A 0.9800 . ?
 C44 H44B 0.9800 . ?
 C44 H44C 0.9800 . ?
 C46 H46 0.9500 . ?

loop_
  _geom_angle_atom_site_label_1
  _geom_angle_atom_site_label_2
  _geom_angle_atom_site_label_3
  _geom_angle
  _geom_angle_site_symmetry_1
  _geom_angle_site_symmetry_3
  _geom_angle_publ_flag
 Cu1 I1 Cu1 58.27(4) 2_666 . ?
 Cu2 I2 Cu2 59.44(4) . 2_445 ?
 I2 Cu2 I2 120.56(4) . 2_445 ?
 Cu2 Cu2 I2 61.08(4) 2_445 . ?
 Cu2 Cu2 I2 59.48(4) 2_445 2_445 ?
 N6 Cu2 I2 103.91(18) 1_434 2_445 ?
 N6 Cu2 I2 102.46(18) 1_434 . ?
 N6 Cu2 Cu2 117.40(17) 1_434 2_445 ?
 N1 Cu2 I2 104.9(2) . 2_445 ?
 N1 Cu2 I2 110.10(19) . . ?
 N1 Cu2 Cu2 127.29(19) . 2_445 ?
 N1 Cu2 N6 115.2(2) . 1_434 ?
 I1 Cu1 I1 121.73(4) 2_666 . ?
 Cu1 Cu1 I1 60.84(4) 2_666 . ?
 Cu1 Cu1 I1 60.88(4) 2_666 2_666 ?
 N4 Cu1 I1 102.89(18) . 2_666 ?
 N4 Cu1 I1 104.91(19) . . ?
 N4 Cu1 Cu1 119.56(18) . 2_666 ?
 N3 Cu1 I1 104.15(18) . . ?
 N3 Cu1 I1 102.86(18) . 2_666 ?
 N3 Cu1 Cu1 118.66(18) . 2_666 ?
 N3 Cu1 N4 121.7(3) . . ?
 C14 O2 C17 116.8(6) . . ?
 C5 N4 Cu1 119.2(5) . . ?
 C5 N4 C1 117.1(7) . . ?
 C1 N4 Cu1 123.7(6) . . ?
 C21 N6 Cu2 121.8(5) . 1_676 ?
 C21 N6 C20 115.8(6) . . ?
 C20 N6 Cu2 121.6(5) . 1_676 ?
 C41 O1 C44 116.0(7) . . ?
 C36 N1 Cu2 118.3(5) . . ?
 C36 N1 C35 116.4(6) . . ?
 C35 N1 Cu2 125.2(5) . . ?
 C6 N5 C7 118.3(6) . . ?
 C23 N3 Cu1 123.6(5) . . ?
 C27 N3 Cu1 119.8(5) . . ?
 C27 N3 C23 116.4(7) . . ?
 C29 N2 C28 116.1(7) . . ?
 C4 C3 C2 117.2(6) . . ?
 C4 C3 C6 121.5(7) . . ?
 C2 C3 C6 121.2(6) . . ?
 N4 C5 H5 118.7 . . ?
 N4 C5 C4 122.6(7) . . ?
 C4 C5 H5 118.7 . . ?
 C3 C4 C5 119.7(7) . . ?
 C3 C4 H4 120.1 . . ?
 C5 C4 H4 120.1 . . ?
 N6 C21 H21 117.9 . . ?
 N6 C21 C22 124.2(7) . . ?
 C22 C21 H21 117.9 . . ?
 C3 C2 H2 120.2 . . ?
 C1 C2 C3 119.5(7) . . ?
 C1 C2 H2 120.2 . . ?
 N6 C20 H20 118.6 . . ?
 N6 C20 C19 122.9(7) . . ?
 C19 C20 H20 118.6 . . ?
 N5 C6 C3 116.4(7) . . ?
 N5 C6 C10 122.4(6) . . ?
 C10 C6 C3 121.2(6) . . ?
 C16 C11 C9 121.9(6) . . ?
 C16 C11 C12 116.1(7) . . ?
 C12 C11 C9 122.0(7) . . ?
 N1 C36 H36 117.6 . . ?
 N1 C36 C37 124.7(7) . . ?
 C37 C36 H36 117.6 . . ?
 C9 C8 H8 119.6 . . ?
 C7 C8 H8 119.6 . . ?
 C7 C8 C9 120.9(6) . . ?
 C37 C33 C29 119.6(7) . . ?
 C34 C33 C37 117.9(7) . . ?
 C34 C33 C29 122.5(7) . . ?
 C6 C10 H10 119.7 . . ?
 C6 C10 C9 120.6(7) . . ?
 C9 C10 H10 119.7 . . ?
 N4 C1 C2 123.8(8) . . ?
 N4 C1 H1 118.1 . . ?
 C2 C1 H1 118.1 . . ?
 C19 C18 C7 122.8(6) . . ?
 C22 C18 C7 122.4(7) . . ?
 C22 C18 C19 114.8(7) . . ?
 C8 C9 C11 122.2(6) . . ?
 C8 C9 C10 116.1(7) . . ?
 C10 C9 C11 121.6(7) . . ?
 N1 C35 H35 118.5 . . ?
 N1 C35 C34 122.9(7) . . ?
 C34 C35 H35 118.5 . . ?
 C39 C38 C31 121.4(6) . . ?
 C39 C38 C43 117.0(7) . . ?
 C43 C38 C31 121.6(7) . . ?
 C36 C37 H37 120.9 . . ?
 C33 C37 C36 118.1(7) . . ?
 C33 C37 H37 120.9 . . ?
 C33 C34 C35 119.8(7) . . ?
 C33 C34 H34 120.1 . . ?
 C35 C34 H34 120.1 . . ?
 N5 C7 C8 121.8(6) . . ?
 N5 C7 C18 115.7(7) . . ?
 C8 C7 C18 122.5(6) . . ?
 C24 C25 C28 122.0(6) . . ?
 C24 C25 C26 117.4(7) . . ?
 C26 C25 C28 120.6(7) . . ?
 C20 C19 C18 121.2(7) . . ?
 C20 C19 H19 119.4 . . ?
 C18 C19 H19 119.4 . . ?
 C21 C22 C18 120.9(7) . . ?
 C21 C22 H22 119.5 . . ?
 C18 C22 H22 119.5 . . ?
 C11 C16 H16 118.9 . . ?
 C15 C16 C11 122.1(7) . . ?
 C15 C16 H16 118.9 . . ?
 C31 C32 H32 119.7 . . ?
 C28 C32 H32 119.7 . . ?
 C28 C32 C31 120.6(7) . . ?
 C31 C30 H30 120.1 . . ?
 C29 C30 H30 120.1 . . ?
 C29 C30 C31 119.8(7) . . ?
 C38 C39 H39 119.0 . . ?
 C38 C39 C40 121.9(7) . . ?
 C40 C39 H39 119.0 . . ?
 O1 C41 C42 115.5(7) . . ?
 O1 C41 C40 125.8(8) . . ?
 C40 C41 C42 118.7(8) . . ?
 C32 C31 C38 121.8(7) . . ?
 C32 C31 C30 116.3(8) . . ?
 C30 C31 C38 121.8(7) . . ?
 O2 C14 C13 115.7(7) . . ?
 O2 C14 C15 125.4(7) . . ?
 C15 C14 C13 119.0(8) . . ?
 C56 C51 N7 119.9(9) . . ?
 C52 C51 N7 123.0(9) . . ?
 C52 C51 C56 117.1(9) . . ?
 C14 C13 H13 119.9 . . ?
 C12 C13 C14 120.3(7) . . ?
 C12 C13 H13 119.9 . . ?
 C25 C24 H24 120.4 . . ?
 C25 C24 C23 119.1(7) . . ?
 C23 C24 H24 120.4 . . ?
 N3 C23 C24 124.0(8) . . ?
 N3 C23 H23 118.0 . . ?
 C24 C23 H23 118.0 . . ?
 N3 C27 H27 117.9 . . ?
 N3 C27 C26 124.2(7) . . ?
 C26 C27 H27 117.9 . . ?
 O2 C17 H17A 109.5 . . ?
 O2 C17 H17B 109.5 . . ?
 O2 C17 H17C 109.5 . . ?
 H17A C17 H17B 109.5 . . ?
 H17A C17 H17C 109.5 . . ?
 H17B C17 H17C 109.5 . . ?
 N2 C29 C33 115.9(7) . . ?
 N2 C29 C30 124.1(6) . . ?
 C30 C29 C33 120.0(7) . . ?
 N2 C28 C25 115.9(7) . . ?
 N2 C28 C32 123.1(7) . . ?
 C32 C28 C25 121.0(6) . . ?
 C41 C42 H42 119.9 . . ?
 C43 C42 C41 120.1(7) . . ?
 C43 C42 H42 119.9 . . ?
 C56 C55 H55 119.5 . . ?
 C54 C55 H55 119.5 . . ?
 C54 C55 C56 121.0(9) . . ?
 C38 C43 H43 119.2 . . ?
 C42 C43 C38 121.7(7) . . ?
 C42 C43 H43 119.2 . . ?
 C51 N7 H7A 109.3 . . ?
 C51 N7 H7B 109.0 . . ?
 H7A N7 H7B 109.4 . . ?
 C16 C15 C14 120.5(7) . . ?
 C16 C15 H15 119.8 . . ?
 C14 C15 H15 119.8 . . ?
 C39 C40 H40 119.7 . . ?
 C41 C40 C39 120.5(8) . . ?
 C41 C40 H40 119.7 . . ?
 C49 C50 H50 119.7 . . ?
 C45 C50 H50 119.7 . . ?
 C45 C50 C49 120.7(10) . . ?
 C51 C56 H56 119.6 . . ?
 C55 C56 C51 120.8(9) . . ?
 C55 C56 H56 119.6 . . ?
 C25 C26 H26 120.5 . . ?
 C27 C26 C25 119.0(7) . . ?
 C27 C26 H26 120.5 . . ?
 C11 C12 H12 119.0 . . ?
 C13 C12 C11 122.0(7) . . ?
 C13 C12 H12 119.0 . . ?
 C50 C49 H49 120.0 . . ?
 C48 C49 C50 120.1(10) . . ?
 C48 C49 H49 120.0 . . ?
 C49 C48 C47 118.1(10) . . ?
 C49 C48 N8 121.7(10) . . ?
 N8 C48 C47 120.3(10) . . ?
 C48 C47 H47 119.4 . . ?
 C46 C47 C48 121.3(10) . . ?
 C46 C47 H47 119.4 . . ?
 C48 N8 H8A 109.0 . . ?
 C48 N8 H8B 109.1 . . ?
 H8A N8 H8B 109.4 . . ?
 C52 C53 H53 119.7 . . ?
 C52 C53 C54 120.6(10) . . ?
 C54 C53 H53 119.7 . . ?
 C51 C52 H52 119.1 . . ?
 C53 C52 C51 121.7(10) . . ?
 C53 C52 H52 119.1 . . ?
 C50 C45 H45 120.6 . . ?
 C46 C45 C50 118.8(10) . . ?
 C46 C45 H45 120.6 . . ?
 C55 C54 C53 118.7(10) . . ?
 C55 C54 H54 120.7 . . ?
 C53 C54 H54 120.7 . . ?
 O1 C44 H44A 109.5 . . ?
 O1 C44 H44B 109.5 . . ?
 O1 C44 H44C 109.5 . . ?
 H44A C44 H44B 109.5 . . ?
 H44A C44 H44C 109.5 . . ?
 H44B C44 H44C 109.5 . . ?
 C47 C46 C45 121.1(10) . . ?
 C47 C46 H46 119.5 . . ?
 C45 C46 H46 119.5 . . ?

_shelx_res_file
;
TITL 1w.res in P-1
    1w.res
    created by SHELXL-2016/6 at 15:52:23 on 12-Mar-2019
REM Old TITL mo_PD040918_0m_4.hkl
REM SHELXT solution in P-1
REM R1 0.143, Rweak 0.012, Alpha 0.096, Orientation as input
REM Formula found by SHELXT: C56 Cu2 I2 N7 O1
CELL 0.71073 12.5064 13.6759 17.512 109.965 89.613 114.963
ZERR 2 0.0012 0.0012 0.0016 0.004 0.004 0.004
LATT 1
SFAC C H Cu I N O
UNIT 112 96 4 4 16 4

L.S. 4
PLAN  20
SIZE 0.45 0.4 0.4
TEMP -173.15
HTAB
BOND $H
fmap 2
acta
REM <olex2.extras>
REM <HklSrc "%.\\1w.hkl">
REM </olex2.extras>

WGHT    0.022100   13.352400
BASF   0.45151
FVAR       0.41204
I1    4    0.590291    0.398569    0.535290    11.00000    0.02715    0.02575 =
         0.02498    0.01162    0.00366    0.01112
I2    4   -0.329927   -0.438276   -0.059092    11.00000    0.02896    0.03576 =
         0.02901    0.01822    0.00726    0.01535
CU2   3   -0.434792   -0.496273    0.060951    11.00000    0.03220    0.02315 =
         0.02187    0.00822    0.00221    0.01409
CU1   3    0.440899    0.497124    0.561681    11.00000    0.02363    0.02266 =
         0.02373    0.00865    0.00083    0.00494
O2    6    1.167392    1.035976    1.254779    11.00000    0.03434    0.03669 =
         0.02885    0.01088   -0.00299    0.01098
N4    5    0.512227    0.630155    0.673230    11.00000    0.02198    0.02503 =
         0.02616    0.01049    0.00635    0.00963
N6    5    0.582080    1.356574    1.047510    11.00000    0.02199    0.01974 =
         0.02798    0.01143    0.00319    0.00904
O1    6   -0.587975    0.085283    0.763813    11.00000    0.04806    0.05658 =
         0.02791    0.01639    0.01560    0.03025
N1    5   -0.355197   -0.362343    0.171135    11.00000    0.03715    0.01991 =
         0.02461    0.00943    0.00264    0.01051
N5    5    0.636203    0.991276    0.928426    11.00000    0.02438    0.02471 =
         0.01782    0.01330    0.00009    0.00808
N3    5    0.276968    0.361795    0.542160    11.00000    0.02357    0.02575 =
         0.02024    0.00854    0.00055    0.00941
N2    5   -0.119477    0.005014    0.421704    11.00000    0.02502    0.02487 =
         0.02235    0.00924    0.00100    0.00782
C3    1    0.616733    0.810943    0.827522    11.00000    0.02493    0.02323 =
         0.01149    0.00950    0.00260    0.00756
C5    1    0.588614    0.628065    0.725362    11.00000    0.04170    0.02501 =
         0.02677    0.01627    0.00157    0.01357
AFIX  43
H5    2    0.605993    0.563303    0.709492    11.00000   -1.20000
AFIX   0
C4    1    0.643551    0.717221    0.801959    11.00000    0.04264    0.01528 =
         0.01554    0.00365   -0.00343    0.00996
AFIX  43
H4    2    0.699083    0.713767    0.836463    11.00000   -1.20000
AFIX   0
C21   1    0.648806    1.352868    1.104997    11.00000    0.03637    0.03163 =
         0.01270    0.00492    0.00268    0.01795
AFIX  43
H21   2    0.675551    1.414958    1.157181    11.00000   -1.20000
AFIX   0
C2    1    0.538985    0.813363    0.772443    11.00000    0.02941    0.03147 =
         0.02318    0.00219   -0.00659    0.01718
AFIX  43
H2    2    0.519963    0.877013    0.786555    11.00000   -1.20000
AFIX   0
C20   1    0.542845    1.264293    0.974763    11.00000    0.03968    0.02639 =
         0.02380    0.00743   -0.00800    0.01045
AFIX  43
H20   2    0.493271    1.262365    0.932867    11.00000   -1.20000
AFIX   0
C6    1    0.672487    0.907327    0.908666    11.00000    0.03325    0.02049 =
         0.01762    0.00753    0.00552    0.01273
C11   1    0.907787    1.011373    1.090309    11.00000    0.02447    0.02319 =
         0.02036    0.01020    0.00761    0.00674
C36   1   -0.406503   -0.369650    0.236726    11.00000    0.03313    0.02189 =
         0.01834    0.00876    0.00951   -0.00045
AFIX  43
H36   2   -0.473784   -0.440698    0.230460    11.00000   -1.20000
AFIX   0
C8    1    0.773662    1.090327    1.054518    11.00000    0.02700    0.02179 =
         0.01127    0.00453   -0.00005    0.01191
AFIX  43
H8    2    0.807166    1.155234    1.105111    11.00000   -1.20000
AFIX   0
C33   1   -0.270972   -0.176525    0.324302    11.00000    0.03274    0.02715 =
         0.02112    0.01218    0.00649    0.01324
C10   1    0.758708    0.910940    0.959615    11.00000    0.03621    0.02444 =
         0.01473    0.00470    0.00420    0.01677
AFIX  43
H10   2    0.781025    0.849333    0.943685    11.00000   -1.20000
AFIX   0
C1    1    0.489974    0.723039    0.697538    11.00000    0.03482    0.03618 =
         0.02807    0.00883    0.00010    0.01499
AFIX  43
H1    2    0.437306    0.726558    0.660852    11.00000   -1.20000
AFIX   0
C18   1    0.646021    1.172671    1.018111    11.00000    0.02410    0.02242 =
         0.01562    0.00914    0.00166    0.00877
C9    1    0.813738    1.004715    1.034720    11.00000    0.02420    0.02720 =
         0.01746    0.00967    0.00620    0.01006
C35   1   -0.257741   -0.262427    0.182453    11.00000    0.02189    0.02950 =
         0.02564    0.01096    0.00959    0.01097
AFIX  43
H35   2   -0.218145   -0.254662    0.136848    11.00000   -1.20000
AFIX   0
C38   1   -0.369133    0.042435    0.586248    11.00000    0.02333    0.02478 =
         0.01615    0.00355   -0.00040    0.00903
C37   1   -0.368823   -0.280414    0.314470    11.00000    0.04272    0.03013 =
         0.01399    0.01145    0.00640    0.01076
AFIX  43
H37   2   -0.409266   -0.290807    0.359300    11.00000   -1.20000
AFIX   0
C34   1   -0.212172   -0.169721    0.258065    11.00000    0.01747    0.02632 =
         0.02954    0.00882    0.00580    0.00721
AFIX  43
H34   2   -0.140818   -0.102040    0.263964    11.00000   -1.20000
AFIX   0
C7    1    0.686098    1.081717    1.001509    11.00000    0.02860    0.02557 =
         0.01571    0.00858    0.00664    0.01191
C25   1    0.040974    0.188480    0.510490    11.00000    0.02140    0.02183 =
         0.02278    0.00980    0.00000    0.00462
C19   1    0.571596    1.173886    0.959135    11.00000    0.03924    0.02821 =
         0.01920    0.00300   -0.00326    0.01780
AFIX  43
H19   2    0.540614    1.110852    0.907448    11.00000   -1.20000
AFIX   0
C22   1    0.680849    1.265551    1.093394    11.00000    0.05117    0.03416 =
         0.01209    0.00763    0.00119    0.02472
AFIX  43
H22   2    0.727551    1.268222    1.137298    11.00000   -1.20000
AFIX   0
C16   1    0.935693    0.919170    1.075935    11.00000    0.03360    0.02500 =
         0.01827    0.00758   -0.00088    0.00759
AFIX  43
H16   2    0.894809    0.850659    1.028317    11.00000   -1.20000
AFIX   0
C32   1   -0.164417    0.111890    0.547688    11.00000    0.02683    0.02199 =
         0.02307    0.00706   -0.00182    0.00577
AFIX  43
H32   2   -0.136187    0.177659    0.597880    11.00000   -1.20000
AFIX   0
C30   1   -0.317550   -0.066198    0.455712    11.00000    0.02858    0.02266 =
         0.02524    0.00821   -0.00438    0.00488
AFIX  43
H30   2   -0.397769   -0.125251    0.440263    11.00000   -1.20000
AFIX   0
C39   1   -0.464994   -0.053995    0.591162    11.00000    0.02685    0.02867 =
         0.02232    0.00795   -0.00138    0.00990
AFIX  43
H39   2   -0.479369   -0.129284    0.554121    11.00000   -1.20000
AFIX   0
C41   1   -0.522792    0.064390    0.702972    11.00000    0.02481    0.04235 =
         0.02308    0.01422    0.00229    0.02196
C31   1   -0.283728    0.030111    0.529599    11.00000    0.02977    0.02281 =
         0.02361    0.00977    0.00067    0.00995
C14   1    1.082230    1.022309    1.198253    11.00000    0.03434    0.03248 =
         0.02264    0.01322   -0.00116    0.00782

C51   1    0.970610    0.365234    0.939151    11.00000    0.03676    0.02778 =
         0.04571    0.01130    0.01081    0.01184
C13   1    1.057930    1.116478    1.213904    11.00000    0.03050    0.03176 =
         0.02732   -0.00655   -0.01255    0.00966
AFIX  43
H13   2    1.100030    1.184964    1.261320    11.00000   -1.20000
AFIX   0
C24   1    0.121073    0.175024    0.458139    11.00000    0.02706    0.02400 =
         0.02238    0.00343   -0.00108    0.00237
AFIX  43
H24   2    0.097015    0.106525    0.410136    11.00000   -1.20000
AFIX   0
C23   1    0.236887    0.262649    0.476519    11.00000    0.02759    0.03736 =
         0.03014    0.01325    0.01618    0.01253
AFIX  43
H23   2    0.291123    0.251547    0.440216    11.00000   -1.20000
AFIX   0
C27   1    0.199514    0.373645    0.591837    11.00000    0.03086    0.03542 =
         0.02919    0.00082    0.01044    0.00906
AFIX  43
H27   2    0.226147    0.443289    0.639199    11.00000   -1.20000
AFIX   0
C17   1    1.196493    0.941346    1.238852    11.00000    0.04062    0.03916 =
         0.03539    0.01357   -0.01201    0.01678
AFIX 137
H17A  2    1.125794    0.872710    1.238676    11.00000   -1.50000
H17B  2    1.260766    0.962352    1.281817    11.00000   -1.50000
H17C  2    1.222913    0.923962    1.185121    11.00000   -1.50000
AFIX   0
C29   1   -0.233955   -0.075040    0.405409    11.00000    0.03285    0.02579 =
         0.01257    0.00744    0.00172    0.01606
C28   1   -0.086627    0.098329    0.493333    11.00000    0.02044    0.02955 =
         0.01959    0.01336    0.00248    0.00991
C42   1   -0.429858    0.163264    0.697022    11.00000    0.01977    0.04260 =
         0.03084    0.00358   -0.00193    0.01504
AFIX  43
H42   2   -0.418347    0.238483    0.732268    11.00000   -1.20000
AFIX   0

C55   1    1.041727    0.392567    0.815350    11.00000    0.04468    0.04381 =
         0.03720    0.01451    0.00682    0.02054
AFIX  43
H55   2    1.104011    0.405325    0.783113    11.00000   -1.20000
AFIX   0

C43   1   -0.354495    0.151618    0.639726    11.00000    0.01760    0.02381 =
         0.03902    0.00489   -0.00354    0.00180
AFIX  43
H43   2   -0.291343    0.219526    0.636741    11.00000   -1.20000
AFIX   0

N7    5    0.990363    0.352652    1.013289    11.00000    0.09211    0.04807 =
         0.04120    0.02455    0.02541    0.03096
AFIX   7
H7A   2    0.955135    0.383813    1.049017    11.00000   -1.20000
H7B   2    0.961403    0.279792    1.004677    11.00000   -1.20000
AFIX   0

C15   1    1.020757    0.923820    1.128494    11.00000    0.03279    0.02317 =
         0.03238    0.01388    0.00190    0.01033
AFIX  43
H15   2    1.037286    0.858914    1.116723    11.00000   -1.20000
AFIX   0
C40   1   -0.540600   -0.043646    0.648699    11.00000    0.03875    0.03775 =
         0.03997    0.02265    0.00354    0.01651
AFIX  43
H40   2   -0.605053   -0.111531    0.650654    11.00000   -1.20000
AFIX   0

C50   1    0.165242    0.647080    0.688385    11.00000    0.03811    0.05075 =
         0.04015    0.01073   -0.00100    0.02230
AFIX  43
H50   2    0.236895    0.658559    0.716371    11.00000   -1.20000
AFIX   0

C56   1    1.061140    0.385062    0.890547    11.00000    0.02620    0.03361 =
         0.04701    0.00567   -0.00046    0.01736
AFIX  43
H56   2    1.136734    0.393459    0.909384    11.00000   -1.20000
AFIX   0

C26   1    0.082014    0.291041    0.579273    11.00000    0.02383    0.03553 =
         0.02863   -0.00524    0.01083    0.00451
AFIX  43
H26   2    0.030266    0.304326    0.617127    11.00000   -1.20000
AFIX   0
C12   1    0.973343    1.111400    1.161278    11.00000    0.03851    0.03173 =
         0.03525    0.00535   -0.00216    0.02161
AFIX  43
H12   2    0.958389    1.177197    1.172925    11.00000   -1.20000
AFIX   0

C49   1    0.061466    0.618384    0.723639    11.00000    0.03770    0.04349 =
         0.03313    0.00146   -0.00642    0.01231
AFIX  43
H49   2    0.062838    0.610915    0.775558    11.00000   -1.20000
AFIX   0
C48   1   -0.042801    0.600891    0.683369    11.00000    0.04069    0.03900 =
         0.05214    0.00602    0.00225    0.01938
C47   1   -0.040844    0.612625    0.606957    11.00000    0.03855    0.04855 =
         0.06185    0.02116   -0.00908    0.01372
AFIX  43
H47   2   -0.111835    0.601513    0.578347    11.00000   -1.20000
AFIX   0
N8    5   -0.146856    0.575009    0.717424    11.00000    0.05473    0.05934 =
         0.06963    0.01141    0.01236    0.02836
AFIX   7
H8A   2   -0.145043    0.541245    0.750498    11.00000   -1.20000
H8B   2   -0.151250    0.638519    0.744330    11.00000   -1.20000
AFIX   0

C53   1    0.844888    0.365729    0.835809    11.00000    0.03566    0.05307 =
         0.04834    0.00517   -0.00739    0.01949
AFIX  43
H53   2    0.770692    0.360800    0.817721    11.00000   -1.20000
AFIX   0
C52   1    0.862921    0.356903    0.909605    11.00000    0.03511    0.04128 =
         0.06071    0.00382    0.01057    0.00671
AFIX  43
H52   2    0.800243    0.344759    0.941544    11.00000   -1.20000
AFIX   0

C45   1    0.164915    0.658985    0.613190    11.00000    0.04457    0.05739 =
         0.04489    0.01194    0.00292    0.01997
AFIX  43
H45   2    0.236098    0.680315    0.589822    11.00000   -1.20000
AFIX   0

C54   1    0.934288    0.381883    0.786880    11.00000    0.05026    0.04117 =
         0.03762    0.00794   -0.00759    0.01381
AFIX  43
H54   2    0.920856    0.385404    0.734761    11.00000   -1.20000
AFIX   0

C44   1   -0.688420   -0.013416    0.766211    11.00000    0.06046    0.06773 =
         0.05577    0.03921    0.03148    0.03843
AFIX 137
H44A  2   -0.741202   -0.054776    0.712878    11.00000   -1.50000
H44B  2   -0.731955    0.011550    0.809416    11.00000   -1.50000
H44C  2   -0.661559   -0.065273    0.777999    11.00000   -1.50000
AFIX   0

C46   1    0.060306    0.639517    0.573014    11.00000    0.05125    0.04909 =
         0.04748    0.01661   -0.00443    0.01359
AFIX  43
H46   2    0.058496    0.644932    0.520421    11.00000   -1.20000
AFIX   0
HKLF 5


REM  1w.res in P-1
REM R1 =  0.0477 for    7041 Fo > 4sig(Fo)  and  0.0730 for all    8943 data
REM    636 parameters refined using      0 restraints

END

WGHT      0.0220     13.3567

REM Instructions for potential hydrogen bonds
HTAB C5 I1
EQIV $5 x+1, y+1, z+1
HTAB C4 I2_$5
EQIV $2 -x-1, -y-1, -z
HTAB C36 I2_$2
EQIV $1 -x+1, -y+1, -z+1
HTAB C1 I1_$1
EQIV $6 -x, -y, -z+1
HTAB C37 I1_$6
EQIV $7 -x+1, -y, -z+1
HTAB C56 I2_$7

REM Highest difference peak  1.435,  deepest hole -1.455,  1-sigma level  0.176
Q1    1   0.6391  0.6648  0.8423  11.00000  0.05    1.43
Q2    1   0.4865  0.7637  0.8698  11.00000  0.05    1.42
Q3    1   0.3538  0.3326  0.5316  11.00000  0.05    1.33
Q4    1  -0.3765 -0.4025 -0.0430  11.00000  0.05    1.28
Q5    1   0.8172  0.4676  0.9158  11.00000  0.05    1.25
Q6    1   0.6229  0.3545  0.5172  11.00000  0.05    1.23
Q7    1   0.4514  0.4228  0.5510  11.00000  0.05    1.20
Q8    1  -0.4874 -0.3415  0.3436  11.00000  0.05    1.19
Q9    1   0.4823  1.3405  1.0427  11.00000  0.05    1.17
Q10   1  -0.2438 -0.2657  0.3455  11.00000  0.05    1.17
Q11   1   0.3029  0.5406  0.5838  11.00000  0.05    1.16
Q12   1   0.7026  1.4647  1.0388  11.00000  0.05    1.14
Q13   1   0.5829  0.4874  0.5468  11.00000  0.05    1.13
Q14   1  -0.4620 -0.4376  0.0800  11.00000  0.05    1.10
Q15   1  -0.2832 -0.3446 -0.0214  11.00000  0.05    1.10
Q16   1   0.0760  0.4885  0.5808  11.00000  0.05    1.05
Q17   1   0.8469  0.3520  1.0181  11.00000  0.05    1.04
Q18   1  -0.3194 -0.5163 -0.0701  11.00000  0.05    1.00
Q19   1  -0.5498 -0.5293  0.0636  11.00000  0.05    0.94
Q20   1   0.5440  0.4499  0.5611  11.00000  0.05    0.92
;
_shelx_res_checksum                49622
_shelx_hkl_file
;
  -2   2   0 1599.95 30.0674  -2
   2   0   0 1599.95 30.0674   1
  -3   3   0 910.296 17.6788  -2
   3   0   0 910.296 17.6788   1
  -4   4   0 1263.43 24.5853  -2
   4   0   0 1263.43 24.5853   1
  -5   5   0 530.899 15.6129  -2
   5   0   0 530.899 15.6129   1
  -6   6   0 342.122 12.0385  -2
   6   0   0 342.122 12.0385   1
  -7   7   0 659.895 31.4263  -2
   7   0   0 659.895 31.4263   1
  -8   8   0 1389.98 67.0975  -2
   8   0   0 1389.98 67.0975   1
   9   0   0 290.599 12.8150   1
  10   0   0 51.6952 9.46535   1
  11   0   0 179.049 23.5964   1
  12   0   0 236.552 35.1374   1
  13   0   0 32.5501 12.0205   1
 -13   1   0 31.1769 11.1494   1
 -12   1   0 247.761 26.7940   1
 -11   1   0 248.694 22.2621   1
 -10   1   0 4.02413 7.81084   1
  -9   8   0 81.4177 16.1057  -2
  -9   1   0 81.4177 16.1057   1
  -8   7   0 445.655 23.8719  -2
  -8   1   0 445.655 23.8719   1
  -7   6   0 677.000 23.9078  -2
  -7   1   0 677.000 23.9078   1
  -6   5   0 178.477 8.49776  -2
  -6   1   0 178.477 8.49776   1
  -5   4   0 444.211 12.0765  -2
  -5   1   0 444.211 12.0765   1
  -4   3   0 2708.27 49.4356  -2
  -4   1   0 2708.27 49.4356   1
  -3   2   0 2284.39 41.7257  -2
  -3   1   0 2284.39 41.7257   1
  -2   1   0 2201.86 51.1310  -2
  -2   1   0 2201.86 51.1310   1
  -1   2   0 2504.38 46.1856  -2
   1   1   0 2504.38 46.1856   1
  -2   3   0 1767.73 33.3226  -2
   2   1   0 1767.73 33.3226   1
  -3   4   0 50.2873 3.79258  -2
   3   1   0 50.2873 3.79258   1
  -4   5   0 331.926 10.9923  -2
   4   1   0 331.926 10.9923   1
  -5   6   0 535.638 20.0841  -2
   5   1   0 535.638 20.0841   1
   6   1   0 113.419 5.63624   1
   7   1   0 825.099 19.1813   1
   8   1   0 1589.42 34.5684   1
   9   1   0 462.891 21.4800   1
  10   1   0 58.4884 12.9212   1
  11   1   0 164.246 24.2819   1
  12   1   0 158.343 30.7694   1
  13   1   0 112.351 30.5474   1
 -14   2   0 4.84743 9.20916   1
 -13   2   0 0.09704 5.69153   1
 -12   2   0 -8.1424 6.19075   1
 -10   8   0 124.621 17.7902  -2
 -10   2   0 124.621 17.7902   1
  -9   7   0 307.599 20.2021  -2
  -9   2   0 307.599 20.2021   1
  -8   6   0 62.4920 7.66227  -2
  -8   2   0 62.4920 7.66227   1
  -7   5   0 171.997 9.28008  -2
  -7   2   0 171.997 9.28008   1
  -6   4   0 77.8525 6.77813  -2
  -6   2   0 77.8525 6.77813   1
  -5   3   0 805.680 18.4139  -2
  -5   2   0 805.680 18.4139   1
  -4   2   0 5176.84 89.3862  -2
  -4   2   0 5176.84 89.3862   1
  -3   1   0 2240.37 45.1277  -2
  -3   2   0 2240.37 45.1277   1
   2   0   0 1492.03 34.7892  -2
  -2   2   0 1492.03 34.7892   1
  -1   2   0 1173.95 18.1283   1
   0   2   0 5258.97 61.5609   1
  -1   3   0 2244.00 70.9325  -2
   1   2   0 2244.00 70.9325   1
  -2   4   0 307.839 17.0069  -2
   2   2   0 307.839 17.0069   1
  -3   5   0 1367.34 35.9997  -2
   3   2   0 1367.34 35.9997   1
   4   2   0 265.169 7.57251   1
   5   2   0 250.853 7.72031   1
   6   2   0 45.2993 4.70106   1
   7   2   0 1235.31 25.4190   1
   8   2   0 2122.15 53.2315   1
   9   2   0 726.648 27.9716   1
  10   2   0 3.90118 4.53026   1
  11   2   0 15.8020 5.80850   1
  12   2   0 239.590 35.7158   1
 -13  10   0 -34.423 28.2675  -2
 -13   3   0 -34.423 28.2675   1
 -12   9   0 32.3137 26.9154  -2
 -12   3   0 32.3137 26.9154   1
 -11   8   0 157.676 29.7677  -2
 -11   3   0 157.676 29.7677   1
 -10   7   0 871.064 31.2818  -2
 -10   3   0 871.064 31.2818   1
  -9   6   0 808.421 31.5627  -2
  -9   3   0 808.421 31.5627   1
  -8   5   0 67.8207 7.91871  -2
  -8   3   0 67.8207 7.91871   1
  -7   4   0 897.731 24.3031  -2
  -7   3   0 897.731 24.3031   1
  -6   3   0 92.5641 6.40468  -2
  -6   3   0 92.5641 6.40468   1
  -5   2   0 779.027 19.7934  -2
  -5   3   0 779.027 19.7934   1
  -4   1   0 2440.00 62.2712  -2
  -4   3   0 2440.00 62.2712   1
   3   0   0 803.030 20.5561  -2
  -3   3   0 803.030 20.5561   1
   2   1   0 1413.59 23.2422  -2
  -2   3   0 1413.59 23.2422   1
  -1   3   0 1732.78 26.7619   1
   0   3   0 409.747 6.75323   1
   1   3   0 886.114 14.0955   1
   2   3   0 25.8298 2.29343   1
   3   3   0 331.855 8.39483   1
   4   3   0 947.083 17.6439   1
   5   3   0 168.065 6.82773   1
   6   3   0 242.842 8.68693   1
   7   3   0 1427.30 33.8973   1
   8   3   0 1279.47 38.8082   1
   9   3   0 759.858 32.0906   1
  10   3   0 51.7752 8.71650   1
  11   3   0 -0.9977 7.38873   1
 -12   8   0 87.4450 26.0156  -2
 -12   4   0 87.4450 26.0156   1
 -11   7   0 790.768 51.5575  -2
 -11   4   0 790.768 51.5575   1
 -10   6   0 1385.83 34.3855  -2
 -10   4   0 1385.83 34.3855   1
  -9   5   0 736.721 27.9180  -2
  -9   4   0 736.721 27.9180   1
  -8   4   0 74.2569 9.27518  -2
  -8   4   0 74.2569 9.27518   1
  -7   3   0 895.844 28.8533  -2
  -7   4   0 895.844 28.8533   1
  -6   2   0 100.071 8.60569  -2
  -6   4   0 100.071 8.60569   1
  -5   1   0 381.826 13.9379  -2
  -5   4   0 381.826 13.9379   1
   4   0   0 1164.44 41.6290  -2
  -4   4   0 1164.44 41.6290   1
   3   1   0 52.1507 8.18411  -2
  -3   4   0 52.1507 8.18411   1
  -2   4   0 350.545 9.49308   1
  -1   4   0 2657.98 36.1755   1
   0   4   0 1026.92 14.5734   1
   1   4   0 94.0099 8.50909   1
   2   4   0 3.58112 2.22846   1
   3   4   0 766.533 13.5958   1
   4   4   0 915.669 17.7867   1
   5   4   0 745.833 16.0152   1
   6   4   0 5.88528 2.63213   1
   7   4   0 633.033 25.1079   1
   8   4   0 275.820 19.3464   1
   9   4   0 514.110 26.7284   1
  10   4   0 2.12412 4.67586   1
  11   4   0 208.420 20.6147   1
 -14   9   0 234.167 35.5711  -2
 -14   5   0 234.167 35.5711   1
 -12   7   0 -12.076 18.4950  -2
 -12   5   0 -12.076 18.4950   1
 -11   6   0 3014.93 118.244  -2
 -11   5   0 3014.93 118.244   1
 -10   5   0 1936.82 52.5607  -2
 -10   5   0 1936.82 52.5607   1
  -9   4   0 693.219 20.2875  -2
  -9   5   0 693.219 20.2875   1
  -8   3   0 27.0744 11.5842  -2
  -8   5   0 27.0744 11.5842   1
  -7   2   0 179.069 9.61825  -2
  -7   5   0 179.069 9.61825   1
  -6   1   0 142.458 10.4996  -2
  -6   5   0 142.458 10.4996   1
   5   0   0 480.299 23.1058  -2
  -5   5   0 480.299 23.1058   1
   4   1   0 420.625 14.8544  -2
  -4   5   0 420.625 14.8544   1
   3   2   0 1556.41 54.7125  -2
  -3   5   0 1556.41 54.7125   1
  -2   5   0 249.112 7.21113   1
  -1   5   0 1386.36 20.9822   1
   0   5   0 369.750 8.09748   1
   1   5   0 310.830 7.01956   1
   2   5   0 59.5467 3.60347   1
   3   5   0 56.0533 4.42060   1
   4   5   0 755.625 16.2167   1
   5   5   0 313.170 13.1903   1
   6   5   0 -0.3163 2.31833   1
   7   5   0 216.550 17.2040   1
   8   5   0 130.155 15.1565   1
   9   5   0 178.901 17.5510   1
  10   5   0 3.01656 7.78167   1
 -15   6   0 404.220 44.1184   1
 -14   8   0 934.286 60.9394  -2
 -14   6   0 934.286 60.9394   1
 -13   7   0 219.926 30.4196  -2
 -13   6   0 219.926 30.4196   1
 -12   6   0 331.282 32.5233  -2
 -12   6   0 331.282 32.5233   1
 -11   5   0 3080.13 119.326  -2
 -11   6   0 3080.13 119.326   1
 -10   4   0 1596.59 71.6623  -2
 -10   6   0 1596.59 71.6623   1
  -9   3   0 717.670 27.8527  -2
  -9   6   0 717.670 27.8527   1
  -8   2   0 64.2813 10.2180  -2
  -8   6   0 64.2813 10.2180   1
  -7   1   0 698.536 26.1205  -2
  -7   6   0 698.536 26.1205   1
   6   0   0 332.414 15.9384  -2
  -6   6   0 332.414 15.9384   1
   5   1   0 454.914 25.4011  -2
  -5   6   0 454.914 25.4011   1
  -4   6   0 61.3460 4.73298   1
  -3   6   0 1806.17 30.2387   1
  -2   6   0 1608.54 24.4938   1
  -1   6   0 601.585 11.5095   1
   0   6   0 22.9114 2.11273   1
   1   6   0 300.149 7.44215   1
   2   6   0 58.5553 5.54681   1
   3   6   0 88.8308 4.99761   1
   4   6   0 9.49889 2.25662   1
   5   6   0 1.06017 2.23376   1
   6   6   0 18.4321 4.85516   1
   7   6   0 73.5951 12.4633   1
   8   6   0 -3.7157 3.66088   1
   9   6   0 -2.9239 5.77786   1
 -15   8   0 516.191 46.6212  -2
 -15   7   0 516.191 46.6212   1
 -14   7   0 472.454 41.4992  -2
 -14   7   0 472.454 41.4992   1
 -13   6   0 263.308 31.2678  -2
 -13   7   0 263.308 31.2678   1
 -12   5   0 0.73740 17.4137  -2
 -12   7   0 0.73740 17.4137   1
 -11   4   0 747.433 45.7688  -2
 -11   7   0 747.433 45.7688   1
 -10   3   0 759.965 30.0662  -2
 -10   7   0 759.965 30.0662   1
  -9   2   0 294.716 26.3211  -2
  -9   7   0 294.716 26.3211   1
  -8   1   0 453.184 22.3523  -2
  -8   7   0 453.184 22.3523   1
   7   0   0 747.090 38.3694  -2
  -7   7   0 747.090 38.3694   1
  -6   7   0 477.922 18.4981   1
  -5   7   0 446.435 13.4307   1
  -4   7   0 921.588 20.8993   1
  -3   7   0 1932.07 33.3441   1
  -2   7   0 1732.21 26.7594   1
  -1   7   0 446.621 9.87266   1
   0   7   0 199.741 6.60485   1
   1   7   0 38.7191 3.86217   1
   2   7   0 36.2019 3.76594   1
   3   7   0 -1.3758 1.35113   1
   4   7   0 3.76337 2.11481   1
   5   7   0 135.295 13.3433   1
   6   7   0 228.678 17.3129   1
   7   7   0 110.124 14.6501   1
   8   7   0 -2.3985 4.50768   1
 -15   7   0 494.780 45.5545  -2
 -15   8   0 494.780 45.5545   1
 -13   5   0 120.194 26.4081  -2
 -13   8   0 120.194 26.4081   1
 -12   4   0 110.787 23.5689  -2
 -12   8   0 110.787 23.5689   1
 -11   3   0 177.056 16.0253  -2
 -11   8   0 177.056 16.0253   1
 -10   2   0 166.431 16.7842  -2
 -10   8   0 166.431 16.7842   1
  -9   1   0 61.2521 20.7753  -2
  -9   8   0 61.2521 20.7753   1
  -8   8   0 327.281 15.1672   1
  -7   8   0 1179.73 25.5965   1
  -6   8   0 920.664 23.0631   1
  -5   8   0 134.555 7.18830   1
  -4   8   0 265.750 9.42091   1
  -3   8   0 1297.01 24.3002   1
  -2   8   0 3505.72 49.7856   1
  -1   8   0 195.663 6.63020   1
   0   8   0 367.937 9.71105   1
   1   8   0 3.65293 1.35886   1
   2   8   0 7.23990 1.63226   1
   3   8   0 2.65068 1.81764   1
   4   8   0 115.928 8.30765   1
   5   8   0 351.274 15.9274   1
   6   8   0 475.838 26.6680   1
   7   8   0 19.6387 5.90709   1
   8   8   0 -5.7084 4.31775   1
 -13   4   0 23.7652 23.9290  -2
 -13   9   0 23.7652 23.9290   1
 -12   3   0 37.9427 14.0726  -2
 -12   9   0 37.9427 14.0726   1
 -11   2   0 -6.3324 19.6298  -2
 -11   9   0 -6.3324 19.6298   1
 -10   9   0 -0.9290 2.56155   1
  -9   9   0 12.0725 3.46679   1
  -8   9   0 341.323 12.8903   1
  -7   9   0 1181.17 29.9559   1
  -6   9   0 1698.66 45.1405   1
  -5   9   0 341.859 12.5847   1
  -4   9   0 390.532 11.0011   1
  -3   9   0 365.920 7.85942   1
  -2   9   0 1265.52 22.1427   1
  -1   9   0 517.946 13.4848   1
   0   9   0 862.534 19.2033   1
   1   9   0 776.091 20.7603   1
   2   9   0 283.636 10.4180   1
   3   9   0 61.2606 6.73200   1
   4   9   0 87.7662 9.17007   1
   5   9   0 494.189 25.8281   1
   6   9   0 456.670 25.2510   1
   7   9   0 18.9480 6.19109   1
 -13   3   0 -12.644 23.5142  -2
 -13  10   0 -12.644 23.5142   1
 -12  10   0 8.68596 3.83374   1
 -11  10   0 133.747 12.4894   1
 -10  10   0 176.053 13.0405   1
  -9  10   0 31.2043 4.27199   1
  -8  10   0 280.738 12.1085   1
  -7  10   0 1007.08 26.1537   1
  -6  10   0 1420.54 34.5765   1
  -5  10   0 73.5272 6.50320   1
  -4  10   0 3.49734 1.36239   1
  -3  10   0 70.6221 7.96470   1
  -2  10   0 448.576 17.1243   1
  -1  10   0 178.090 7.14349   1
   0  10   0 327.718 11.9636   1
   1  10   0 117.888 8.12511   1
   2  10   0 458.945 16.6706   1
   3  10   0 33.1535 3.44673   1
   4  10   0 102.778 12.8020   1
   5  10   0 407.752 23.0500   1
 -14  11   0 12.5949 8.84258   1
 -13  11   0 159.236 18.3448   1
 -12  11   0 131.868 13.2656   1
 -11  11   0 -2.2240 2.40944   1
 -10  11   0 114.464 9.53620   1
  -9  11   0 55.4035 7.11545   1
  -8  11   0 188.861 11.2564   1
  -7  11   0 433.329 15.7372   1
  -6  11   0 541.120 16.9940   1
  -5  11   0 88.1416 5.00579   1
  -4  11   0 5.47248 3.04691   1
  -3  11   0 185.469 13.5533   1
  -2  11   0 38.3225 6.12107   1
  -1  11   0 31.7306 6.29175   1
   0  11   0 19.4868 3.61486   1
   1  11   0 503.240 16.3250   1
   2  11   0 402.203 23.4796   1
   3  11   0 21.6016 3.43230   1
   4  11   0 2.15093 4.82022   1
 -13  12   0 100.479 10.9021   1
 -12  12   0 3.52494 3.34561   1
 -11  12   0 17.0700 3.62389   1
 -10  12   0 15.6488 3.68581   1
  -9  12   0 44.8998 4.95864   1
  -8  12   0 65.9621 8.39296   1
  -7  12   0 76.7935 8.05791   1
  -6  12   0 40.2340 3.81408   1
  -5  12   0 3.43923 3.57866   1
  -4  12   0 6.25646 3.50892   1
  -3  12   0 -0.5434 3.14094   1
  -2  12   0 244.262 16.1465   1
  -1  12   0 4.87580 3.92745   1
   0  12   0 177.416 16.6635   1
   1  12   0 407.511 21.5093   1
   2  12   0 280.087 18.8986   1
   3  12   0 23.7237 6.77451   1
 -12  13   0 42.1792 5.75566   1
  12   1   0 196.237 34.8161  -2
 -11  13   0 196.237 34.8161   1
 -10  13   0 13.8926 4.55887   1
  -9  13   0 -5.0350 3.71925   1
  -8  13   0 75.3283 11.3189   1
  -7  13   0 80.2760 7.57359   1
  -6  13   0 8.83280 3.87962   1
  -5  13   0 94.3330 12.5395   1
  -4  13   0 14.1383 4.68830   1
  -3  13   0 8.15650 4.30202   1
  -2  13   0 155.506 20.4185   1
  -1  13   0 6.19786 4.19143   1
   0  13   0 60.4613 11.7169   1
   1  13   0 267.796 18.8101   1
  12   2   0 200.656 32.9629  -2
 -11  14   0 200.656 32.9629   1
  11   3   0 -4.2151 22.0892  -2
 -10  14   0 -4.2151 22.0892   1
  10   4   0 131.659 27.2855  -2
  -9  14   0 131.659 27.2855   1
  -8  14   0 53.3094 7.08826   1
  -7  14   0 -0.2240 4.04668   1
  -6  14   0 152.201 14.8978   1
  -5  14   0 213.338 18.8660   1
  -4  14   0 4.64694 4.41986   1
  -3  14   0 -4.9203 3.87268   1
  -2  14   0 28.0622 6.28781   1
  -1  14   0 2.28600 4.29984   1
  -9  15   0 230.443 12.4150   1
  -8  15   0 110.698 14.1517   1
  -7  15   0 17.1273 8.71215   1
   7   9   0 57.8446 18.9153  -2
  -6  15   0 57.8446 18.9153   1
  -5  15   0 73.4250 12.8790   1
  -4  15   0 17.7465 5.57900   1
   3 -15   1 147.037 15.8868   1
   4 -15   1 125.587 15.0977   1
   5 -15   1 139.691 15.4649   1
   6 -15   1 -6.9535 5.14648   1
  -8  -8   1 9.08377 22.0742  -2
   7 -15   1 9.08377 22.0742   1
   8 -15   1 7.30790 7.81973   1
   9 -15   1 2.58054 2.45628   1
  10 -15   1 8.18728 3.75044   1
   0 -14   1 159.208 18.5664   1
   1 -14   1 11.9313 5.60353   1
   2 -14   1 13.5447 5.33754   1
   3 -14   1 109.184 13.5453   1
   4 -14   1 14.3296 4.87412   1
   5 -14   1 21.8244 6.54233   1
   6 -14   1 56.4821 10.9141   1
   7 -14   1 155.936 15.0387   1
   8 -14   1 203.967 10.4935   1
   9 -14   1 12.2131 3.40579   1
  10 -14   1 48.1061 6.41131   1
 -12  -2   1 375.425 40.1117  -2
  11 -14   1 375.425 40.1117   1
  12 -14   1 194.727 15.7118   1
  -2 -13   1 4.47079 5.05784   1
  -1 -13   1 100.272 13.8384   1
   0 -13   1 81.1828 18.7968   1
   1 -13   1 144.606 14.2050   1
   2 -13   1 0.99277 3.93786   1
   3 -13   1 -1.7060 3.29108   1
   4 -13   1 12.3376 4.35663   1
   5 -13   1 1.84158 3.87470   1
   6 -13   1 72.2555 11.4460   1
   7 -13   1 487.634 15.9281   1
   8 -13   1 420.735 15.9350   1
   9 -13   1 194.520 12.0796   1
 -11  -2   1 155.506 29.5623  -2
  10 -13   1 155.506 29.5623   1
  11 -13   1 341.002 15.8860   1
  12 -13   1 378.307 17.3521   1
  13 -13   1 101.742 13.2977   1
  -3 -12   1 100.003 14.3240   1
  -2 -12   1 -2.5922 3.68088   1
  -1 -12   1 67.4454 11.6265   1
   0 -12   1 217.300 15.8839   1
   1 -12   1 -1.6114 3.70623   1
   2 -12   1 1.68203 3.43151   1
   3 -12   1 54.1928 10.4052   1
   4 -12   1 149.378 13.1780   1
   5 -12   1 100.490 11.6539   1
   6 -12   1 16.8259 3.15063   1
   7 -12   1 241.055 11.5221   1
   8 -12   1 799.751 23.6085   1
   9 -12   1 83.1681 8.49415   1
  10 -12   1 -5.8361 2.53809   1
  11 -12   1 96.0756 9.86553   1
  12 -12   1 27.9455 4.85618   1
  13 -12   1 -0.1381 6.66558   1
  -5 -11   1 5.66287 4.61643   1
  -4 -11   1 10.0990 4.40666   1
  -3 -11   1 0.47391 2.80391   1
  -2 -11   1 7.52203 4.37135   1
  -1 -11   1 159.676 13.8513   1
   0 -11   1 376.049 19.4362   1
   1 -11   1 29.4358 5.90744   1
   2 -11   1 13.9393 4.42567   1
   3 -11   1 166.174 13.0240   1
   4 -11   1 264.652 13.2653   1
   5 -11   1 279.706 13.6265   1
   6 -11   1 42.0417 5.55011   1
   7 -11   1 476.062 16.6829   1
   8 -11   1 299.439 14.1882   1
   9 -11   1 20.3224 3.63118   1
  10 -11   1 8.65243 3.19765   1
  11 -11   1 11.4343 3.90086   1
  12 -11   1 0.28860 4.42066   1
 -13   2   1 59.8413 27.4389  -2
  13 -11   1 59.8413 27.4389   1
  14 -11   1 32.7369 12.5083   1
  -6 -10   1 50.1947 8.95975   1
  -5 -10   1 4.51823 3.96565   1
  -4 -10   1 1.54856 3.30509   1
  -3 -10   1 11.3068 2.49175   1
  -2 -10   1 1.54088 1.74828   1
  -1 -10   1 0.37131 2.10108   1
   0 -10   1 49.0891 9.06177   1
   1 -10   1 962.043 26.0606   1
   2 -10   1 316.459 13.7200   1
   3 -10   1 50.9503 7.57660   1
   4 -10   1 392.472 16.3293   1
   5 -10   1 88.2996 6.57128   1
   6 -10   1 27.0716 3.50154   1
   7 -10   1 100.118 8.80457   1
   8 -10   1 68.3915 8.33878   1
   9 -10   1 0.37147 2.61930   1
  10 -10   1 12.3122 3.62454   1
  11 -10   1 72.3786 10.3968   1
 -12   2   1 240.535 21.7991  -2
  12 -10   1 240.535 21.7991   1
 -13   3   1 117.513 28.8597  -2
  13 -10   1 117.513 28.8597   1
  -7  -9   1 -5.1955 4.30880   1
  -6  -9   1 21.0733 5.64923   1
  -5  -9   1 18.8268 3.88243   1
  -4  -9   1 27.3243 3.54746   1
  -3  -9   1 168.931 8.80041   1
  -2  -9   1 95.7246 6.42645   1
  -1  -9   1 21.4475 2.46726   1
   0  -9   1 934.671 19.7682   1
   1  -9   1 812.041 22.2715   1
   2  -9   1 405.092 12.7339   1
   3  -9   1 7.36862 2.62395   1
   4  -9   1 36.2495 3.67987   1
   5  -9   1 3.79425 1.75543   1
   6  -9   1 13.4152 2.79635   1
   7  -9   1 25.2250 3.76806   1
   8  -9   1 14.2519 3.63499   1
   9  -9   1 125.460 10.8586   1
 -10   1   1 46.7175 11.2563  -2
  10  -9   1 46.7175 11.2563   1
 -11   2   1 4.92700 11.9482  -2
  11  -9   1 4.92700 11.9482   1
 -12   3   1 435.376 38.9540  -2
  12  -9   1 435.376 38.9540   1
 -13   4   1 473.287 40.6363  -2
  13  -9   1 473.287 40.6363   1
  -8  -8   1 -1.9555 7.15176   1
  -7  -8   1 -0.0312 6.03456   1
  -6  -8   1 -6.2749 3.68049   1
  -5  -8   1 8.29834 3.10694   1
  -4  -8   1 252.158 10.7698   1
  -3  -8   1 716.991 17.8414   1
  -2  -8   1 976.098 19.0120   1
  -1  -8   1 10.3084 2.15528   1
   0  -8   1 238.288 7.36905   1
   1  -8   1 1149.83 24.8377   1
   2  -8   1 351.761 11.1313   1
   3  -8   1 2.08097 1.72795   1
   4  -8   1 12.3489 1.88373   1
   5  -8   1 0.86615 1.41874   1
   6  -8   1 6.61109 2.19394   1
   7  -8   1 4.52118 2.46821   1
  -8   0   1 401.714 29.5497  -2
   8  -8   1 401.714 29.5497   1
  -9   1   1 984.923 51.1399  -2
   9  -8   1 984.923 51.1399   1
 -10   2   1 665.023 27.0453  -2
  10  -8   1 665.023 27.0453   1
 -11   3   1 104.192 24.7087  -2
  11  -8   1 104.192 24.7087   1
 -12   4   1 365.269 34.6840  -2
  12  -8   1 365.269 34.6840   1
 -13   5   1 279.508 32.4343  -2
  13  -8   1 279.508 32.4343   1
 -14   6   1 75.2637 24.3153  -2
  14  -8   1 75.2637 24.3153   1
 -15   7   1 49.0552 24.8169  -2
  15  -8   1 49.0552 24.8169   1
  -9  -7   1 -3.8166 4.50708   1
  -8  -7   1 2.55954 4.67335   1
  -7  -7   1 90.7952 14.1947   1
  -6  -7   1 122.646 13.6280   1
  -5  -7   1 -1.1986 2.24095   1
  -4  -7   1 416.099 13.3435   1
  -3  -7   1 1106.05 23.2426   1
  -2  -7   1 815.428 14.9832   1
  -1  -7   1 27.1033 7.05179   1
   0  -7   1 228.076 6.86495   1
   1  -7   1 653.263 15.1203   1
   2  -7   1 52.8737 4.74539   1
   3  -7   1 834.411 16.7076   1
   4  -7   1 99.5271 5.45640   1
   5  -7   1 715.373 18.5203   1
  -6  -1   1 614.001 21.8886  -2
   6  -7   1 614.001 21.8886   1
  -7   0   1 182.415 10.8559  -2
   7  -7   1 182.415 10.8559   1
  -8   1   1 934.738 33.4916  -2
   8  -7   1 934.738 33.4916   1
  -9   2   1 1422.52 58.1172  -2
   9  -7   1 1422.52 58.1172   1
 -10   3   1 476.374 35.4708  -2
  10  -7   1 476.374 35.4708   1
 -11   4   1 226.448 28.4563  -2
  11  -7   1 226.448 28.4563   1
 -12   5   1 92.4575 22.3007  -2
  12  -7   1 92.4575 22.3007   1
 -13   6   1 103.861 22.7133  -2
  13  -7   1 103.861 22.7133   1
 -14   7   1 15.9553 21.1041  -2
  14  -7   1 15.9553 21.1041   1
  15  -7   1 6.81817 9.97789   1
 -10  -6   1 17.8397 6.47418   1
  -9  -6   1 -2.0878 4.35569   1
  -8  -6   1 11.7766 4.66011   1
  -7  -6   1 263.585 18.6043   1
  -6  -6   1 419.896 17.0812   1
  -5  -6   1 80.6834 9.55467   1
  -4  -6   1 114.916 6.39882   1
  -3  -6   1 1106.63 18.6854   1
  -2  -6   1 744.229 14.7261   1
  -1  -6   1 157.889 5.04248   1
   0  -6   1 8.19465 1.10862   1
   1  -6   1 89.9221 4.96697   1
   2  -6   1 268.021 8.31455   1
   3  -6   1 33.2225 3.73611   1
  -4  -2   1 1329.88 48.0371  -2
   4  -6   1 1329.88 48.0371   1
  -5  -1   1 3101.81 72.3676  -2
   5  -6   1 3101.81 72.3676   1
  -6   0   1 2580.94 61.6194  -2
   6  -6   1 2580.94 61.6194   1
  -7   1   1 74.0484 7.22500  -2
   7  -6   1 74.0484 7.22500   1
  -8   2   1 649.076 24.6896  -2
   8  -6   1 649.076 24.6896   1
  -9   3   1 1456.40 44.0324  -2
   9  -6   1 1456.40 44.0324   1
 -10   4   1 377.348 32.7228  -2
  10  -6   1 377.348 32.7228   1
 -11   5   1 95.2598 21.0283  -2
  11  -6   1 95.2598 21.0283   1
 -14   8   1 38.9036 24.5467  -2
  14  -6   1 38.9036 24.5467   1
  15  -6   1 4.06064 9.13780   1
 -10  -5   1 155.079 18.8109   1
  -9  -5   1 56.2587 8.53196   1
  -8  -5   1 3.61630 4.44001   1
  -7  -5   1 401.421 21.7399   1
  -6  -5   1 436.644 16.9106   1
  -5  -5   1 12.0333 2.21851   1
  -4  -5   1 918.327 18.1581   1
  -3  -5   1 439.966 9.76433   1
  -2  -5   1 259.552 6.76421   1
  -1  -5   1 3.37338 0.85348   1
   0  -5   1 30.9356 2.07672   1
   1  -5   1 328.910 8.60882   1
   2  -5   1 518.474 10.6417   1
  -3  -2   1 590.267 18.5091  -2
   3  -5   1 590.267 18.5091   1
  -4  -1   1 818.580 18.8811  -2
   4  -5   1 818.580 18.8811   1
  -5   0   1 4220.01 94.5726  -2
   5  -5   1 4220.01 94.5726   1
  -6   1   1 3175.52 74.8091  -2
   6  -5   1 3175.52 74.8091   1
  -7   2   1 286.311 10.9847  -2
   7  -5   1 286.311 10.9847   1
  -8   3   1 419.281 28.9703  -2
   8  -5   1 419.281 28.9703   1
  -9   4   1 472.907 21.7683  -2
   9  -5   1 472.907 21.7683   1
 -10   5   1 128.625 23.1090  -2
  10  -5   1 128.625 23.1090   1
 -11   6   1 195.844 27.9525  -2
  11  -5   1 195.844 27.9525   1
 -12   7   1 -17.673 19.2194  -2
  12  -5   1 -17.673 19.2194   1
 -14   9   1 66.4244 30.0272  -2
  14  -5   1 66.4244 30.0272   1
 -11  -4   1 7.43691 5.30224   1
 -10  -4   1 328.564 22.7652   1
  -9  -4   1 293.372 20.1675   1
  -8  -4   1 49.4641 8.00499   1
  -7  -4   1 205.852 14.7161   1
  -6  -4   1 73.7290 6.57154   1
  -5  -4   1 2.72544 1.52599   1
  -4  -4   1 21.5049 2.13880   1
  -3  -4   1 335.545 7.93887   1
  -2  -4   1 415.201 8.52988   1
  -1  -4   1 24.2344 3.91995   1
   0  -4   1 139.097 3.48349   1
   1  -4   1 1886.05 30.3714   1
  -2  -2   1 2129.88 40.4783  -2
   2  -4   1 2129.88 40.4783   1
  -3  -1   1 462.342 13.8378  -2
   3  -4   1 462.342 13.8378   1
  -4   0   1 843.669 34.2484  -2
   4  -4   1 843.669 34.2484   1
  -5   1   1 3196.55 63.9288  -2
   5  -4   1 3196.55 63.9288   1
  -6   2   1 2455.63 60.5803  -2
   6  -4   1 2455.63 60.5803   1
  -7   3   1 3.38621 5.36187  -2
   7  -4   1 3.38621 5.36187   1
  -8   4   1 -5.2880 6.98944  -2
   8  -4   1 -5.2880 6.98944   1
  -9   5   1 -13.300 13.7998  -2
   9  -4   1 -13.300 13.7998   1
 -10   6   1 -2.8913 10.2303  -2
  10  -4   1 -2.8913 10.2303   1
 -11   7   1 12.4332 22.7435  -2
  11  -4   1 12.4332 22.7435   1
 -12   8   1 651.273 50.9280  -2
  12  -4   1 651.273 50.9280   1
 -14  10   1 -7.2515 31.2373  -2
  14  -4   1 -7.2515 31.2373   1
 -12  -3   1 16.6656 6.08181   1
 -11  -3   1 231.225 20.5711   1
 -10  -3   1 264.995 19.8633   1
  -9  -3   1 227.187 17.5632   1
  -8  -3   1 2.29021 3.42380   1
  -7  -3   1 5.00369 2.03000   1
  -6  -3   1 15.8113 2.73331   1
  -5  -3   1 70.6872 4.84003   1
  -4  -3   1 188.370 6.53608   1
   3  -6   1 797.542 34.2149  -2
  -3  -3   1 797.542 34.2149   1
   2  -5   1 1868.78 64.2648  -2
  -2  -3   1 1868.78 64.2648   1
  -1  -3   1 222.140 8.68358   1
   0  -3   1 316.663 12.8648  -2
   0  -3   1 316.663 12.8648   1
   1  -3   1 5909.24 84.5374   1
  -2  -1   1 3805.07 59.8220  -2
   2  -3   1 3805.07 59.8220   1
  -3   0   1 3362.26 74.9886  -2
   3  -3   1 3362.26 74.9886   1
  -4   1   1 918.182 36.9046  -2
   4  -3   1 918.182 36.9046   1
  -5   2   1 1707.99 43.7802  -2
   5  -3   1 1707.99 43.7802   1
  -6   3   1 407.782 17.0642  -2
   6  -3   1 407.782 17.0642   1
  -7   4   1 87.5829 9.43917  -2
   7  -3   1 87.5829 9.43917   1
  -8   5   1 9.54558 5.41769  -2
   8  -3   1 9.54558 5.41769   1
  -9   6   1 216.002 11.8274  -2
   9  -3   1 216.002 11.8274   1
 -11   8   1 241.484 34.6713  -2
  11  -3   1 241.484 34.6713   1
 -12   9   1 326.200 40.8789  -2
  12  -3   1 326.200 40.8789   1
 -13  10   1 526.612 51.8661  -2
  13  -3   1 526.612 51.8661   1
  14  -3   1 175.744 34.7430   1
 -12  -2   1 12.0155 6.44656   1
 -11  -2   1 17.7311 5.83267   1
 -10  -2   1 129.244 13.5875   1
  -9  -2   1 22.2412 7.65029   1
  -8  -2   1 -0.2468 2.39998   1
  -7  -2   1 65.1743 5.35796   1
  -6  -2   1 287.303 8.79071   1
  -5  -2   1 558.538 12.0059   1
   4  -6   1 1103.14 32.7707  -2
  -4  -2   1 1103.14 32.7707   1
   3  -5   1 680.133 17.0241  -2
  -3  -2   1 680.133 17.0241   1
   2  -4   1 2355.43 54.4571  -2
  -2  -2   1 2355.43 54.4571   1
   1  -3   1 8803.73 186.572  -2
  -1  -2   1 8803.73 186.572   1
   0  -2   1 0.61218 0.53433   1
  -1  -1   1 155.819 6.22550  -2
   1  -2   1 155.819 6.22550   1
  -2   0   1 726.093 18.7717  -2
   2  -2   1 726.093 18.7717   1
  -3   1   1 286.050 10.5103  -2
   3  -2   1 286.050 10.5103   1
  -4   2   1 668.010 20.5303  -2
   4  -2   1 668.010 20.5303   1
  -5   3   1 445.930 13.7019  -2
   5  -2   1 445.930 13.7019   1
  -6   4   1 208.044 10.2149  -2
   6  -2   1 208.044 10.2149   1
  -7   5   1 280.326 11.9644  -2
   7  -2   1 280.326 11.9644   1
  -8   6   1 395.806 16.4107  -2
   8  -2   1 395.806 16.4107   1
  -9   7   1 645.098 26.5778  -2
   9  -2   1 645.098 26.5778   1
 -10   8   1 198.548 20.1990  -2
  10  -2   1 198.548 20.1990   1
 -11   9   1 118.299 31.2085  -2
  11  -2   1 118.299 31.2085   1
  12  -2   1 277.827 35.2076   1
  13  -2   1 383.039 42.8288   1
  14  -2   1 31.8505 11.6824   1
 -13  -1   1 149.923 33.2107   1
 -12  -1   1 37.2632 11.3865   1
 -11  -1   1 -3.5301 5.54480   1
 -10  -1   1 0.17768 3.26027   1
  -9  -1   1 2.99596 3.46358   1
  -8  -1   1 2.97144 2.64402   1
  -7  -1   1 100.323 6.13138   1
   6  -7   1 644.314 16.9113  -2
  -6  -1   1 644.314 16.9113   1
   5  -6   1 3171.39 47.8500  -2
  -5  -1   1 3171.39 47.8500   1
   4  -5   1 681.515 13.5739  -2
  -4  -1   1 681.515 13.5739   1
   3  -4   1 531.952 14.6613  -2
  -3  -1   1 531.952 14.6613   1
   2  -3   1 3787.99 53.3848  -2
  -2  -1   1 3787.99 53.3848   1
   1  -2   1 144.216 4.34314  -2
  -1  -1   1 144.216 4.34314   1
  -2   1   1 88.3330 6.58124  -2
   2  -1   1 88.3330 6.58124   1
  -3   2   1 522.788 24.0161  -2
   3  -1   1 522.788 24.0161   1
  -4   3   1 273.439 10.3912  -2
   4  -1   1 273.439 10.3912   1
  -5   4   1 74.7324 5.40089  -2
   5  -1   1 74.7324 5.40089   1
  -6   5   1 283.788 10.6845  -2
   6  -1   1 283.788 10.6845   1
  -7   6   1 443.370 24.5882  -2
   7  -1   1 443.370 24.5882   1
  -8   7   1 813.162 33.2156  -2
   8  -1   1 813.162 33.2156   1
  -9   8   1 871.353 53.9476  -2
   9  -1   1 871.353 53.9476   1
  10  -1   1 297.006 22.5363   1
  11  -1   1 5.24992 5.70178   1
  12  -1   1 230.327 34.3023   1
  13  -1   1 298.253 28.4739   1
 -13   0   1 10.1045 10.5366   1
 -11   0   1 -0.2943 6.01439   1
 -10   0   1 66.2212 9.78180   1
   9  -9   1 646.804 45.6642  -2
  -9   0   1 646.804 45.6642   1
   8  -8   1 401.566 32.7665  -2
  -8   0   1 401.566 32.7665   1
   7  -7   1 239.160 15.0001  -2
  -7   0   1 239.160 15.0001   1
   6  -6   1 2889.97 51.2980  -2
  -6   0   1 2889.97 51.2980   1
   5  -5   1 4042.96 73.5232  -2
  -5   0   1 4042.96 73.5232   1
   4  -4   1 741.476 17.4800  -2
  -4   0   1 741.476 17.4800   1
   3  -3   1 3621.49 57.6227  -2
  -3   0   1 3621.49 57.6227   1
   2  -2   1 711.998 11.1182  -2
  -2   0   1 711.998 11.1182   1
   1  -1   1 11.8909 2.24213  -2
  -1   0   1 11.8909 2.24213   1
  -1   1   1 42.9546 3.45591  -2
   1   0   1 42.9546 3.45591   1
  -2   2   1 1102.54 18.8031  -2
   2   0   1 1102.54 18.8031   1
  -3   3   1 1690.74 60.5478  -2
   3   0   1 1690.74 60.5478   1
  -4   4   1 331.019 10.9556  -2
   4   0   1 331.019 10.9556   1
  -5   5   1 268.015 10.9888  -2
   5   0   1 268.015 10.9888   1
  -6   6   1 1271.11 32.4130  -2
   6   0   1 1271.11 32.4130   1
   7   0   1 538.970 15.5840   1
   8   0   1 104.022 8.33864   1
   9   0   1 405.388 19.4204   1
  10   0   1 173.756 20.9116   1
  11   0   1 -1.0068 5.56571   1
  12   0   1 25.7463 11.0155   1
  13   0   1 19.9359 10.3844   1
 -12   1   1 -3.7390 5.17854   1
 -11   1   1 58.6014 9.96575   1
  10  -9   1 51.7978 17.4619  -2
 -10   1   1 51.7978 17.4619   1
   9  -8   1 1132.80 44.0905  -2
  -9   1   1 1132.80 44.0905   1
   8  -7   1 773.268 23.3246  -2
  -8   1   1 773.268 23.3246   1
   7  -6   1 122.737 10.0895  -2
  -7   1   1 122.737 10.0895   1
   6  -5   1 3067.71 53.1984  -2
  -6   1   1 3067.71 53.1984   1
   5  -4   1 3071.69 47.8809  -2
  -5   1   1 3071.69 47.8809   1
   4  -3   1 948.430 18.4957  -2
  -4   1   1 948.430 18.4957   1
   3  -2   1 272.200 6.40060  -2
  -3   1   1 272.200 6.40060   1
   2  -1   1 95.4087 6.28150  -2
  -2   1   1 95.4087 6.28150   1
  -1   1   1 0.58709 0.56693   1
   0   1   1 2.20524 0.32304   1
   1   1   1 12.7638 1.69689   1
   2   1   1 677.525 15.2692   1
  -3   4   1 1808.25 35.7305  -2
   3   1   1 1808.25 35.7305   1
  -4   5   1 447.749 17.1023  -2
   4   1   1 447.749 17.1023   1
  -5   6   1 3221.17 113.232  -2
   5   1   1 3221.17 113.232   1
   6   1   1 2118.12 32.5004   1
   7   1   1 206.533 9.06896   1
   8   1   1 -1.0205 3.13241   1
   9   1   1 12.2538 4.80181   1
  10   1   1 181.312 16.8263   1
  11   1   1 31.9116 10.5818   1
  12   1   1 -6.2028 7.61839   1
 -14   2   1 14.9975 10.3111   1
 -13   2   1 127.567 27.4599   1
  10  -8   1 808.961 36.3334  -2
 -10   2   1 808.961 36.3334   1
   9  -7   1 1323.07 46.0894  -2
  -9   2   1 1323.07 46.0894   1
   8  -6   1 585.491 16.2693  -2
  -8   2   1 585.491 16.2693   1
   7  -5   1 325.327 11.8486  -2
  -7   2   1 325.327 11.8486   1
   6  -4   1 2361.85 45.1298  -2
  -6   2   1 2361.85 45.1298   1
   5  -3   1 1686.86 33.0492  -2
  -5   2   1 1686.86 33.0492   1
   4  -2   1 667.903 16.9123  -2
  -4   2   1 667.903 16.9123   1
   3  -1   1 578.745 18.0240  -2
  -3   2   1 578.745 18.0240   1
  -1   2   1 8.31548 1.31273   1
   0   2   1 429.775 6.58204   1
  -1   3   1 1780.13 57.7525  -2
   1   2   1 1780.13 57.7525   1
   2   2   1 4510.98 60.3781   1
   3   2   1 2316.50 33.8521   1
   4   2   1 252.156 7.64965   1
   5   2   1 8.21261 1.50435   1
   6   2   1 206.032 8.76411   1
   7   2   1 222.954 10.0756   1
   8   2   1 -3.0119 3.18411   1
   9   2   1 9.31553 4.41963   1
  10   2   1 185.208 17.8054   1
  11   2   1 53.4434 11.8717   1
  12   2   1 5.66796 8.75749   1
  14 -11   1 -4.2365 31.7280  -2
 -14   3   1 -4.2365 31.7280   1
  13 -10   1 177.532 34.5010  -2
 -13   3   1 177.532 34.5010   1
  12  -9   1 407.276 40.4328  -2
 -12   3   1 407.276 40.4328   1
  11  -8   1 39.5021 22.4686  -2
 -11   3   1 39.5021 22.4686   1
  10  -7   1 530.635 26.7768  -2
 -10   3   1 530.635 26.7768   1
   9  -6   1 1316.00 38.2824  -2
  -9   3   1 1316.00 38.2824   1
   8  -5   1 489.463 21.7431  -2
  -8   3   1 489.463 21.7431   1
   7  -4   1 10.1309 3.08952  -2
  -7   3   1 10.1309 3.08952   1
   6  -3   1 370.245 11.5031  -2
  -6   3   1 370.245 11.5031   1
   5  -2   1 467.270 14.8263  -2
  -5   3   1 467.270 14.8263   1
   4  -1   1 238.980 10.8881  -2
  -4   3   1 238.980 10.8881   1
   3   0   1 1363.36 59.2273  -2
  -3   3   1 1363.36 59.2273   1
  -2   3   1 479.665 13.2255   1
  -1   3   1 1549.56 27.7954   1
   0   3   1 276.656 5.46103   1
   1   3   1 342.169 6.72490   1
   2   3   1 1932.37 26.0248   1
   3   3   1 1407.83 22.9324   1
   4   3   1 122.397 5.73428   1
   5   3   1 54.1885 4.75633   1
   6   3   1 19.6269 2.64413   1
   7   3   1 4.01332 3.56043   1
   8   3   1 -5.6530 3.09384   1
   9   3   1 111.806 14.9581   1
  10   3   1 113.919 15.6641   1
  11   3   1 217.297 20.3703   1
  14 -10   1 15.8660 25.1922  -2
 -14   4   1 15.8660 25.1922   1
  12  -8   1 426.169 39.1159  -2
 -12   4   1 426.169 39.1159   1
  11  -7   1 211.550 27.2367  -2
 -11   4   1 211.550 27.2367   1
  10  -6   1 402.401 33.0061  -2
 -10   4   1 402.401 33.0061   1
   9  -5   1 421.927 15.3789  -2
  -9   4   1 421.927 15.3789   1
   8  -4   1 0.04863 3.27989  -2
  -8   4   1 0.04863 3.27989   1
   7  -3   1 82.4716 9.42374  -2
  -7   4   1 82.4716 9.42374   1
   6  -2   1 189.515 11.7151  -2
  -6   4   1 189.515 11.7151   1
   5  -1   1 105.311 8.81879  -2
  -5   4   1 105.311 8.81879   1
   4   0   1 430.583 15.9371  -2
  -4   4   1 430.583 15.9371   1
   3   1   1 1399.58 33.0651  -2
  -3   4   1 1399.58 33.0651   1
  -2   4   1 2199.13 34.0027   1
  -1   4   1 2284.75 31.6484   1
   0   4   1 436.864 8.55994   1
   1   4   1 163.036 4.66280   1
   2   4   1 1353.11 19.9653   1
   3   4   1 541.959 12.0922   1
   4   4   1 388.473 10.6083   1
   5   4   1 101.661 6.20042   1
   6   4   1 204.631 11.9037   1
   7   4   1 86.7104 12.7259   1
   8   4   1 10.3291 4.87485   1
   9   4   1 205.325 18.6197   1
  10   4   1 610.910 31.6422   1
  11   4   1 136.166 18.6680   1
  14  -9   1 56.5792 25.9575  -2
 -14   5   1 56.5792 25.9575   1
  12  -7   1 31.6670 19.9116  -2
 -12   5   1 31.6670 19.9116   1
  11  -6   1 75.8787 19.1279  -2
 -11   5   1 75.8787 19.1279   1
  10  -5   1 148.322 14.4924  -2
 -10   5   1 148.322 14.4924   1
   9  -4   1 9.35601 8.34132  -2
  -9   5   1 9.35601 8.34132   1
   8  -3   1 -3.8786 7.24307  -2
  -8   5   1 -3.8786 7.24307   1
   7  -2   1 260.777 14.7330  -2
  -7   5   1 260.777 14.7330   1
   6  -1   1 256.693 13.8462  -2
  -6   5   1 256.693 13.8462   1
   5   0   1 352.771 15.6109  -2
  -5   5   1 352.771 15.6109   1
   4   1   1 329.946 17.5950  -2
  -4   5   1 329.946 17.5950   1
  -3   5   1 346.005 12.1483   1
  -2   5   1 1220.71 21.7573   1
  -1   5   1 1817.94 26.6119   1
   0   5   1 652.246 11.0054   1
   1   5   1 202.279 5.83478   1
   2   5   1 757.215 13.4059   1
   3   5   1 548.515 11.6970   1
   4   5   1 42.2923 4.11276   1
   5   5   1 72.5169 8.28026   1
   6   5   1 244.467 13.5392   1
   7   5   1 333.293 20.8596   1
   8   5   1 1.06858 4.11470   1
   9   5   1 6.19693 5.37443   1
  10   5   1 247.377 21.6207   1
 -15   6   1 35.2790 11.5583   1
  14  -8   1 70.9720 24.2417  -2
 -14   6   1 70.9720 24.2417   1
  13  -7   1 89.5977 21.5131  -2
 -13   6   1 89.5977 21.5131   1
  11  -5   1 172.382 15.2955  -2
 -11   6   1 172.382 15.2955   1
  10  -4   1 -2.8098 9.96701  -2
 -10   6   1 -2.8098 9.96701   1
   9  -3   1 216.989 16.4802  -2
  -9   6   1 216.989 16.4802   1
   8  -2   1 432.435 21.5800  -2
  -8   6   1 432.435 21.5800   1
   7  -1   1 567.139 23.6614  -2
  -7   6   1 567.139 23.6614   1
   6   0   1 1084.57 33.5946  -2
  -6   6   1 1084.57 33.5946   1
  -5   6   1 2032.08 39.5060   1
  -4   6   1 792.370 18.1332   1
  -3   6   1 119.451 6.41140   1
  -2   6   1 178.129 5.57606   1
  -1   6   1 938.312 16.1721   1
   0   6   1 80.6478 4.15586   1
   1   6   1 52.6658 3.56843   1
   2   6   1 9.15931 1.58165   1
   3   6   1 14.3291 2.12916   1
   4   6   1 0.61391 1.86443   1
   5   6   1 132.248 10.3502   1
   6   6   1 344.689 20.6075   1
   7   6   1 471.859 25.0402   1
   8   6   1 21.3789 6.53571   1
   9   6   1 15.5414 5.30260   1
  15  -8   1 27.2895 21.5219  -2
 -15   7   1 27.2895 21.5219   1
  14  -7   1 31.8832 21.4650  -2
 -14   7   1 31.8832 21.4650   1
  13  -6   1 69.8817 21.4445  -2
 -13   7   1 69.8817 21.4445   1
  12  -5   1 1.15880 17.5758  -2
 -12   7   1 1.15880 17.5758   1
  11  -4   1 113.431 21.3789  -2
 -11   7   1 113.431 21.3789   1
  10  -3   1 0.71226 11.9194  -2
 -10   7   1 0.71226 11.9194   1
   9  -2   1 676.416 44.5140  -2
  -9   7   1 676.416 44.5140   1
   8  -1   1 944.213 34.8016  -2
  -8   7   1 944.213 34.8016   1
  -7   7   1 86.8536 7.78918   1
  -6   7   1 218.952 8.55841   1
  -5   7   1 897.270 21.0232   1
  -4   7   1 597.153 19.6175   1
  -3   7   1 0.02677 1.50695   1
  -2   7   1 493.309 10.6887   1
  -1   7   1 15.0823 1.90623   1
   0   7   1 -2.1672 1.38374   1
   1   7   1 109.224 5.03944   1
   2   7   1 2.14155 1.57438   1
   3   7   1 239.656 8.96979   1
   4   7   1 7.59274 2.62843   1
   5   7   1 16.4223 3.57512   1
   6   7   1 215.669 17.6717   1
   7   7   1 443.764 26.5419   1
   8   7   1 15.9067 5.78857   1
  13  -5   1 141.051 25.3664  -2
 -13   8   1 141.051 25.3664   1
  12  -4   1 656.735 30.0874  -2
 -12   8   1 656.735 30.0874   1
  11  -3   1 345.346 23.7446  -2
 -11   8   1 345.346 23.7446   1
  10  -2   1 184.187 17.2854  -2
 -10   8   1 184.187 17.2854   1
   9  -1   1 750.561 49.3132  -2
  -9   8   1 750.561 49.3132   1
  -8   8   1 824.418 25.4775   1
  -7   8   1 365.294 12.1987   1
  -6   8   1 11.5533 2.39026   1
  -5   8   1 283.315 10.3044   1
  -4   8   1 10.0586 2.41253   1
  -3   8   1 5.99456 1.35781   1
  -2   8   1 4.72582 1.21537   1
  -1   8   1 64.0696 4.37838   1
   0   8   1 173.656 7.54553   1
   1   8   1 112.568 6.00966   1
   2   8   1 121.843 6.89327   1
   3   8   1 95.9043 7.34849   1
   4   8   1 119.824 10.1650   1
   5   8   1 1.65769 3.66685   1
   6   8   1 131.783 15.9550   1
   7   8   1 67.1048 8.79735   1
  13  -4   1 650.034 29.7854  -2
 -13   9   1 650.034 29.7854   1
  12  -3   1 337.454 23.0642  -2
 -12   9   1 337.454 23.0642   1
 -11   9   1 241.572 19.0959   1
 -10   9   1 10.1662 3.56030   1
  -9   9   1 405.147 15.1984   1
  -8   9   1 241.519 11.5652   1
  -7   9   1 51.2407 6.68940   1
  -6   9   1 -0.5804 1.80212   1
  -5   9   1 30.2113 3.95880   1
  -4   9   1 5.11200 1.41537   1
  -3   9   1 106.737 5.37691   1
  -2   9   1 0.65329 1.24173   1
  -1   9   1 439.349 12.4095   1
   0   9   1 709.848 19.5976   1
   1   9   1 235.716 9.56385   1
   2   9   1 53.0244 6.82985   1
   3   9   1 311.309 12.1571   1
   4   9   1 144.555 11.2304   1
   5   9   1 -5.5405 3.60033   1
   6   9   1 1.88137 4.45391   1
 -13  10   1 166.854 15.1874   1
 -12  10   1 466.552 21.5559   1
 -11  10   1 319.653 14.2221   1
 -10  10   1 5.89375 2.89054   1
  -9  10   1 0.26656 2.46478   1
  -8  10   1 73.6173 7.48091   1
  -7  10   1 11.1854 2.82409   1
  -6  10   1 23.9124 4.24497   1
  -5  10   1 287.624 11.2448   1
  -4  10   1 667.744 13.8102   1
  -3  10   1 291.089 10.2192   1
  -2  10   1 82.8938 5.75290   1
  -1  10   1 361.808 11.4718   1
   0  10   1 793.708 21.1492   1
   1  10   1 7.16597 2.16022   1
   2  10   1 0.84774 2.17150   1
   3  10   1 5.42627 3.23507   1
   4  10   1 2.43854 3.06793   1
   5  10   1 -3.6767 5.18654   1
  14  -3   1 222.848 27.8036  -2
 -14  11   1 222.848 27.8036   1
 -13  11   1 8.03270 3.69435   1
 -12  11   1 166.465 11.7869   1
 -11  11   1 69.1915 10.0721   1
 -10  11   1 1.17693 2.68581   1
  -9  11   1 8.78672 2.95460   1
  -8  11   1 2.66809 2.31095   1
  -7  11   1 6.57046 2.69858   1
  -6  11   1 6.55331 2.19491   1
  -5  11   1 403.181 13.6024   1
  -4  11   1 947.817 17.6143   1
  -3  11   1 584.547 14.8129   1
  -2  11   1 44.7347 4.82839   1
  -1  11   1 310.476 11.7870   1
   0  11   1 344.549 13.1753   1
   1  11   1 180.489 14.6100   1
   2  11   1 18.4276 3.45969   1
   3  11   1 -0.5540 6.32577   1
   4  11   1 6.67357 4.66444   1
 -13  12   1 2.77210 3.44294   1
 -12  12   1 33.0066 5.17502   1
 -11  12   1 21.6336 3.96626   1
 -10  12   1 3.73285 2.84075   1
  -9  12   1 17.6801 3.40841   1
  -8  12   1 257.729 11.9961   1
  -7  12   1 197.337 11.0050   1
  -6  12   1 6.40294 1.76423   1
  -5  12   1 279.394 8.70278   1
  -4  12   1 834.077 30.0532   1
  -3  12   1 274.282 16.7560   1
  -2  12   1 -1.2776 3.50340   1
  -1  12   1 2.49265 3.82277   1
   0  12   1 58.2842 10.9507   1
   1  12   1 24.1257 5.44922   1
   2  12   1 21.2409 5.88981   1
 -12  13   1 -1.7589 3.34324   1
  12   1   1 10.0430 26.4902  -2
 -11  13   1 10.0430 26.4902   1
 -10  13   1 11.0383 3.46424   1
  -9  13   1 103.921 9.30099   1
  -8  13   1 256.338 12.9244   1
  -7  13   1 186.483 8.29268   1
  -6  13   1 3.31876 1.36220   1
  -5  13   1 157.868 14.0710   1
  -4  13   1 131.807 13.2858   1
  -3  13   1 101.842 12.7433   1
  -2  13   1 31.1234 5.75281   1
  -1  13   1 5.65666 6.56935   1
   0  13   1 -6.4225 3.73983   1
   1  13   1 -0.1698 6.26835   1
  12   2   1 77.3820 26.4653  -2
 -11  14   1 77.3820 26.4653   1
  11   3   1 232.124 31.4816  -2
 -10  14   1 232.124 31.4816   1
  -9  14   1 17.4977 3.71743   1
  -8  14   1 208.283 11.7286   1
  -7  14   1 261.199 17.9118   1
  -6  14   1 3.50681 4.71154   1
  -5  14   1 0.51432 3.99619   1
  -4  14   1 76.6920 12.2185   1
  -3  14   1 18.2120 5.71526   1
  -2  14   1 4.13963 4.53417   1
  -1  14   1 9.21984 4.79693   1
  -8  15   1 15.2239 5.52115   1
  -7  15   1 26.4813 6.47832   1
  -6  15   1 8.10369 5.13132   1
  -5  15   1 -3.5949 3.84399   1
   2 -15   2 2.96742 5.29036   1
   3 -15   2 -4.1268 4.19851   1
   4 -15   2 23.7272 6.17641   1
   5 -15   2 163.383 16.5174   1
   6 -15   2 170.274 16.3405   1
   7 -15   2 -6.5556 6.19686   1
  -9  -7   2 126.957 26.8704  -2
   8 -15   2 126.957 26.8704   1
 -10  -5   2 253.972 35.4286  -2
   9 -15   2 253.972 35.4286   1
  10 -15   2 131.920 12.4401   1
   0 -14   2 15.5918 5.59133   1
   1 -14   2 -2.1065 4.07335   1
   2 -14   2 47.5022 8.10112   1
   3 -14   2 -1.7240 3.77962   1
   4 -14   2 82.7845 14.6115   1
   5 -14   2 217.561 17.0814   1
   6 -14   2 86.3817 12.5250   1
   7 -14   2 1.32071 3.72527   1
   8 -14   2 238.479 17.6919   1
   9 -14   2 330.804 14.7518   1
 -11  -3   2 235.202 33.6894  -2
  10 -14   2 235.202 33.6894   1
  11 -14   2 -0.4466 4.69340   1
  12 -14   2 -9.6240 3.29181   1
  -2 -13   2 9.95972 5.46308   1
  -1 -13   2 144.190 15.1240   1
   0 -13   2 6.62249 4.40289   1
   1 -13   2 18.0786 5.43388   1
   2 -13   2 18.0087 5.39447   1
   3 -13   2 19.1441 5.12503   1
   4 -13   2 9.48794 3.99580   1
   5 -13   2 98.5309 12.1627   1
   6 -13   2 45.8908 7.51513   1
   7 -13   2 -2.9943 4.22528   1
   8 -13   2 99.2099 8.79283   1
   9 -13   2 60.2365 8.57091   1
 -11  -2   2 -23.935 24.5047  -2
  10 -13   2 -23.935 24.5047   1
  11 -13   2 -5.0348 2.74289   1
  12 -13   2 -3.2254 3.77381   1
  13 -13   2 17.6031 5.74746   1
  -3 -12   2 -3.7316 2.85525   1
  -2 -12   2 125.442 14.0105   1
  -1 -12   2 177.280 16.7912   1
   0 -12   2 489.836 23.2253   1
   1 -12   2 10.9063 4.18666   1
   2 -12   2 77.9515 11.3664   1
   3 -12   2 201.695 15.0644   1
   4 -12   2 0.57601 2.91644   1
   5 -12   2 49.8171 9.84200   1
   6 -12   2 56.4586 15.3891   1
   7 -12   2 6.72017 2.40836   1
   8 -12   2 68.3806 8.08597   1
   9 -12   2 -0.4556 3.45039   1
  10 -12   2 3.28933 3.32991   1
  11 -12   2 2.19248 2.98336   1
  12 -12   2 11.9906 4.56225   1
  13 -12   2 89.8449 16.2037   1
  -5 -11   2 97.0919 14.6938   1
  -4 -11   2 15.0295 4.17130   1
  -3 -11   2 22.6084 3.71379   1
  -2 -11   2 428.856 15.6918   1
  -1 -11   2 1487.65 44.4353   1
   0 -11   2 116.679 12.1568   1
   1 -11   2 12.8655 4.12676   1
   2 -11   2 71.2878 10.0860   1
   3 -11   2 153.595 12.4680   1
   4 -11   2 1.83206 2.98924   1
   5 -11   2 8.53337 3.78858   1
   6 -11   2 12.8310 2.41282   1
   7 -11   2 101.719 8.40042   1
   8 -11   2 5.32039 2.76027   1
   9 -11   2 3.81765 2.58294   1
  10 -11   2 103.083 10.9524   1
  11 -11   2 165.856 13.1820   1
  12 -11   2 -4.4595 5.24501   1
 -13   2   2 0.11923 27.2369  -2
  13 -11   2 0.11923 27.2369   1
 -14   3   2 65.6104 31.7017  -2
  14 -11   2 65.6104 31.7017   1
  -6 -10   2 160.489 16.9003   1
  -5 -10   2 206.509 17.2941   1
  -4 -10   2 72.8356 9.33376   1
  -3 -10   2 100.937 9.09170   1
  -2 -10   2 879.052 23.8112   1
  -1 -10   2 452.950 20.4469   1
   0 -10   2 660.058 25.2037   1
   1 -10   2 56.8631 13.6609   1
   2 -10   2 4.44059 2.49753   1
   3 -10   2 3.65226 2.66425   1
   4 -10   2 26.3076 4.26760   1
   5 -10   2 97.1987 8.81666   1
   6 -10   2 319.014 12.4955   1
   7 -10   2 559.247 18.4817   1
   8 -10   2 84.0373 9.05263   1
   9 -10   2 78.7455 11.7078   1
  10 -10   2 405.822 18.4232   1
 -11   1   2 209.692 20.6998  -2
  11 -10   2 209.692 20.6998   1
 -12   2   2 141.500 27.6186  -2
  12 -10   2 141.500 27.6186   1
 -13   3   2 -4.1254 25.6181  -2
  13 -10   2 -4.1254 25.6181   1
  -7  -9   2 52.7426 8.59161   1
  -6  -9   2 337.794 21.4228   1
  -5  -9   2 440.457 15.4948   1
  -4  -9   2 292.627 11.7866   1
  -3  -9   2 58.7968 6.25152   1
  -2  -9   2 373.387 14.0690   1
  -1  -9   2 943.301 23.3362   1
   0  -9   2 326.435 13.6412   1
   1  -9   2 179.830 10.9471   1
   2  -9   2 142.973 8.04100   1
   3  -9   2 79.9563 7.47110   1
   4  -9   2 270.686 12.1032   1
   5  -9   2 35.5060 4.43192   1
   6  -9   2 691.195 19.9233   1
   7  -9   2 1424.25 41.8743   1
   8  -9   2 164.720 14.4018   1
  -9   0   2 630.673 27.4463  -2
   9  -9   2 630.673 27.4463   1
 -10   1   2 160.394 13.4184  -2
  10  -9   2 160.394 13.4184   1
 -11   2   2 329.700 34.9481  -2
  11  -9   2 329.700 34.9481   1
 -12   3   2 1.87920 22.3717  -2
  12  -9   2 1.87920 22.3717   1
 -13   4   2 11.3070 22.9027  -2
  13  -9   2 11.3070 22.9027   1
  -8  -8   2 12.6472 5.52754   1
  -7  -8   2 16.4642 6.57716   1
  -6  -8   2 329.534 20.2194   1
  -5  -8   2 584.297 19.8176   1
  -4  -8   2 509.301 15.0976   1
  -3  -8   2 34.1450 3.23309   1
  -2  -8   2 243.994 8.92839   1
  -1  -8   2 334.150 10.6140   1
   0  -8   2 290.707 11.7058   1
   1  -8   2 247.752 9.54286   1
   2  -8   2 168.656 9.11314   1
   3  -8   2 1050.90 25.5068   1
   4  -8   2 132.573 6.64833   1
   5  -8   2 593.129 16.7176   1
   6  -8   2 904.539 28.9433   1
  -7  -1   2 3327.04 113.063  -2
   7  -8   2 3327.04 113.063   1
  -8   0   2 1664.97 33.7967  -2
   8  -8   2 1664.97 33.7967   1
 -10   2   2 609.368 41.3018  -2
  10  -8   2 609.368 41.3018   1
 -11   3   2 13.4608 19.9071  -2
  11  -8   2 13.4608 19.9071   1
 -13   5   2 -2.8658 19.7230  -2
  13  -8   2 -2.8658 19.7230   1
 -14   6   2 215.571 31.5657  -2
  14  -8   2 215.571 31.5657   1
  -9  -7   2 11.1314 5.75288   1
  -8  -7   2 113.941 18.5190   1
  -7  -7   2 62.3102 8.34773   1
  -6  -7   2 218.921 13.9865   1
  -5  -7   2 466.164 15.1935   1
  -4  -7   2 89.7777 7.05781   1
  -3  -7   2 -1.2365 1.27755   1
  -2  -7   2 42.0625 3.91265   1
  -1  -7   2 2.87692 0.99691   1
   0  -7   2 0.36752 0.91191   1
   1  -7   2 194.552 7.64232   1
   2  -7   2 357.573 12.4770   1
   3  -7   2 1407.94 30.7373   1
  -4  -3   2 2285.75 80.7194  -2
   4  -7   2 2285.75 80.7194   1
  -5  -2   2 276.586 13.1578  -2
   5  -7   2 276.586 13.1578   1
  -6  -1   2 913.918 22.6257  -2
   6  -7   2 913.918 22.6257   1
  -7   0   2 2405.46 49.4470  -2
   7  -7   2 2405.46 49.4470   1
  -8   1   2 1563.55 44.3955  -2
   8  -7   2 1563.55 44.3955   1
  -9   2   2 791.923 38.5285  -2
   9  -7   2 791.923 38.5285   1
 -10   3   2 149.904 24.3689  -2
  10  -7   2 149.904 24.3689   1
 -11   4   2 130.412 24.6797  -2
  11  -7   2 130.412 24.6797   1
 -13   6   2 386.078 38.4197  -2
  13  -7   2 386.078 38.4197   1
 -14   7   2 737.547 55.4839  -2
  14  -7   2 737.547 55.4839   1
  15  -7   2 204.549 36.3580   1
 -10  -6   2 7.82955 5.76714   1
  -9  -6   2 53.4152 9.24324   1
  -8  -6   2 240.761 18.0685   1
  -7  -6   2 7.41971 4.20130   1
  -6  -6   2 186.796 11.7260   1
  -5  -6   2 303.924 11.6119   1
  -4  -6   2 42.7809 4.34816   1
  -3  -6   2 2.19891 1.48547   1
  -2  -6   2 1.54432 1.03981   1
  -1  -6   2 160.355 4.96318   1
   0  -6   2 462.929 9.68307   1
   1  -6   2 364.766 10.0512   1
   2  -6   2 1336.37 28.4611   1
   3  -6   2 3424.83 53.5419   1
  -4  -2   2 1928.40 37.7449  -2
   4  -6   2 1928.40 37.7449   1
  -5  -1   2 66.7958 5.98383  -2
   5  -6   2 66.7958 5.98383   1
  -6   0   2 1179.49 27.5699  -2
   6  -6   2 1179.49 27.5699   1
  -7   1   2 1595.07 43.7695  -2
   7  -6   2 1595.07 43.7695   1
  -8   2   2 267.493 23.9699  -2
   8  -6   2 267.493 23.9699   1
  -9   3   2 121.829 12.5537  -2
   9  -6   2 121.829 12.5537   1
 -10   4   2 477.864 36.9630  -2
  10  -6   2 477.864 36.9630   1
 -11   5   2 475.823 38.9850  -2
  11  -6   2 475.823 38.9850   1
 -12   6   2 155.051 27.8549  -2
  12  -6   2 155.051 27.8549   1
 -14   8   2 668.024 55.0068  -2
  14  -6   2 668.024 55.0068   1
 -10  -5   2 -3.0481 5.26640   1
  -9  -5   2 -1.7075 4.02920   1
  -8  -5   2 20.4058 5.76221   1
  -7  -5   2 105.040 13.1428   1
  -6  -5   2 35.8201 4.19006   1
  -5  -5   2 -1.0967 1.53969   1
  -4  -5   2 618.385 12.8426   1
  -3  -5   2 161.947 5.68380   1
  -2  -5   2 177.687 5.49167   1
  -1  -5   2 497.348 9.14165   1
   0  -5   2 339.099 7.39434   1
   1  -5   2 178.584 6.12952   1
   2  -5   2 1996.91 32.1933   1
  -3  -2   2 4491.20 80.4691  -2
   3  -5   2 4491.20 80.4691   1
  -4  -1   2 2295.65 43.9277  -2
   4  -5   2 2295.65 43.9277   1
  -5   0   2 85.4154 7.71555  -2
   5  -5   2 85.4154 7.71555   1
  -6   1   2 1022.06 30.6114  -2
   6  -5   2 1022.06 30.6114   1
  -7   2   2 29.7013 6.79905  -2
   7  -5   2 29.7013 6.79905   1
  -8   3   2 11.3593 10.4250  -2
   8  -5   2 11.3593 10.4250   1
  -9   4   2 423.063 32.2987  -2
   9  -5   2 423.063 32.2987   1
 -10   5   2 1717.91 79.5226  -2
  10  -5   2 1717.91 79.5226   1
 -11   6   2 1058.87 61.6925  -2
  11  -5   2 1058.87 61.6925   1
 -12   7   2 101.926 27.6839  -2
  12  -5   2 101.926 27.6839   1
 -14   9   2 565.971 53.6291  -2
  14  -5   2 565.971 53.6291   1
 -11  -4   2 20.6951 10.2255   1
 -10  -4   2 6.04757 5.31710   1
  -9  -4   2 46.9481 7.81010   1
  -8  -4   2 163.330 15.0760   1
  -7  -4   2 125.359 11.8864   1
  -6  -4   2 55.8119 5.70127   1
  -5  -4   2 241.516 8.39561   1
  -4  -4   2 811.177 14.2018   1
  -3  -4   2 7.98204 1.31731   1
   2  -6   2 1190.54 47.5512  -2
  -2  -4   2 1190.54 47.5512   1
  -1  -4   2 308.250 6.73484   1
   0  -4   2 319.627 6.66118   1
   1  -4   2 6.04613 1.34925   1
  -2  -2   2 1777.77 42.5159  -2
   2  -4   2 1777.77 42.5159   1
  -3  -1   2 5669.01 100.357  -2
   3  -4   2 5669.01 100.357   1
  -4   0   2 174.601 13.3157  -2
   4  -4   2 174.601 13.3157   1
  -5   1   2 228.684 11.2517  -2
   5  -4   2 228.684 11.2517   1
  -6   2   2 217.221 12.1888  -2
   6  -4   2 217.221 12.1888   1
  -7   3   2 605.061 23.0398  -2
   7  -4   2 605.061 23.0398   1
  -8   4   2 128.795 14.7386  -2
   8  -4   2 128.795 14.7386   1
  -9   5   2 293.007 29.1258  -2
   9  -4   2 293.007 29.1258   1
 -10   6   2 1987.47 88.5427  -2
  10  -4   2 1987.47 88.5427   1
 -11   7   2 777.143 54.9815  -2
  11  -4   2 777.143 54.9815   1
 -12   8   2 398.752 42.8221  -2
  12  -4   2 398.752 42.8221   1
 -14  10   2 105.345 37.8547  -2
  14  -4   2 105.345 37.8547   1
 -12  -3   2 5.76256 5.39688   1
 -11  -3   2 0.42262 6.22286   1
 -10  -3   2 66.8557 8.72996   1
  -9  -3   2 53.9647 8.98282   1
  -8  -3   2 1049.20 33.0825   1
  -7  -3   2 642.552 16.6143   1
  -6  -3   2 13.4665 2.17720   1
  -5  -3   2 283.888 8.39258   1
  -4  -3   2 1129.67 18.9314   1
   3  -6   2 4987.37 110.315  -2
  -3  -3   2 4987.37 110.315   1
   2  -5   2 1804.04 36.1092  -2
  -2  -3   2 1804.04 36.1092   1
   1  -4   2 116.395 10.4289  -2
  -1  -3   2 116.395 10.4289   1
   0  -3   2 33.1331 3.31015  -2
   0  -3   2 33.1331 3.31015   1
  -1  -2   2 77.3960 8.38785  -2
   1  -3   2 77.3960 8.38785   1
  -2  -1   2 9246.98 139.786  -2
   2  -3   2 9246.98 139.786   1
  -3   0   2 399.085 11.2822  -2
   3  -3   2 399.085 11.2822   1
  -4   1   2 2818.50 65.4681  -2
   4  -3   2 2818.50 65.4681   1
  -5   2   2 95.5231 7.71409  -2
   5  -3   2 95.5231 7.71409   1
  -6   3   2 290.630 14.5934  -2
   6  -3   2 290.630 14.5934   1
  -7   4   2 824.262 29.0055  -2
   7  -3   2 824.262 29.0055   1
  -8   5   2 412.368 20.9719  -2
   8  -3   2 412.368 20.9719   1
  -9   6   2 235.535 16.2652  -2
   9  -3   2 235.535 16.2652   1
 -10   7   2 1462.69 74.7019  -2
  10  -3   2 1462.69 74.7019   1
 -11   8   2 631.670 50.6320  -2
  11  -3   2 631.670 50.6320   1
 -13  10   2 -13.138 31.8253  -2
  13  -3   2 -13.138 31.8253   1
  14  -3   2 -4.4415 8.96797   1
 -12  -2   2 -3.3711 8.14896   1
 -11  -2   2 17.0517 5.30240   1
 -10  -2   2 77.8531 11.5332   1
  -9  -2   2 161.102 13.9257   1
  -8  -2   2 1399.10 31.5443   1
  -7  -2   2 943.880 18.7572   1
  -6  -2   2 275.256 8.32831   1
   5  -7   2 401.960 13.7676  -2
  -5  -2   2 401.960 13.7676   1
   4  -6   2 2063.82 33.2678  -2
  -4  -2   2 2063.82 33.2678   1
   3  -5   2 4207.24 60.4534  -2
  -3  -2   2 4207.24 60.4534   1
   2  -4   2 1488.84 22.4620  -2
  -2  -2   2 1488.84 22.4620   1
   1  -3   2 68.7283 4.97644  -2
  -1  -2   2 68.7283 4.97644   1
   0  -2   2 6945.91 161.961  -2
   0  -2   2 6945.91 161.961   1
  -1  -1   2 1807.53 29.1994  -2
   1  -2   2 1807.53 29.1994   1
  -2   0   2 40.8763 3.01938  -2
   2  -2   2 40.8763 3.01938   1
  -3   1   2 4081.42 90.8477  -2
   3  -2   2 4081.42 90.8477   1
  -4   2   2 2789.61 65.6982  -2
   4  -2   2 2789.61 65.6982   1
  -5   3   2 975.571 29.6553  -2
   5  -2   2 975.571 29.6553   1
  -6   4   2 598.879 18.1671  -2
   6  -2   2 598.879 18.1671   1
  -7   5   2 1182.31 29.7122  -2
   7  -2   2 1182.31 29.7122   1
  -8   6   2 815.630 33.2033  -2
   8  -2   2 815.630 33.2033   1
  -9   7   2 259.755 31.1248  -2
   9  -2   2 259.755 31.1248   1
 -10   8   2 408.633 40.5906  -2
  10  -2   2 408.633 40.5906   1
  11  -2   2 83.2971 25.5337   1
  12  -2   2 1.34443 7.29519   1
  14  -2   2 -9.3051 6.87835   1
 -13  -1   2 22.9532 10.5202   1
 -12  -1   2 46.3722 12.3435   1
 -11  -1   2 220.948 29.0578   1
 -10  -1   2 -0.3968 3.60229   1
  -9  -1   2 205.169 11.1501   1
  -8  -1   2 1870.15 46.0861   1
  -7  -1   2 2437.46 39.5458   1
   6  -7   2 920.267 18.6505  -2
  -6  -1   2 920.267 18.6505   1
   5  -6   2 78.1327 5.47884  -2
  -5  -1   2 78.1327 5.47884   1
   4  -5   2 2409.80 36.4520  -2
  -4  -1   2 2409.80 36.4520   1
   3  -4   2 5873.53 99.3743  -2
  -3  -1   2 5873.53 99.3743   1
   2  -3   2 9577.13 136.422  -2
  -2  -1   2 9577.13 136.422   1
   1  -2   2 1774.59 29.5738  -2
  -1  -1   2 1774.59 29.5738   1
   0  -1   2 2392.12 59.8431  -2
   0  -1   2 2392.12 59.8431   1
  -1   0   2 957.115 18.8817  -2
   1  -1   2 957.115 18.8817   1
  -2   1   2 338.821 9.59529  -2
   2  -1   2 338.821 9.59529   1
  -3   2   2 2275.69 77.1965  -2
   3  -1   2 2275.69 77.1965   1
  -4   3   2 2447.72 46.8803  -2
   4  -1   2 2447.72 46.8803   1
  -5   4   2 1558.85 33.6773  -2
   5  -1   2 1558.85 33.6773   1
  -6   5   2 116.588 8.52202  -2
   6  -1   2 116.588 8.52202   1
   7  -1   2 8.58762 2.78596   1
  -8   7   2 7.06928 18.3659  -2
   8  -1   2 7.06928 18.3659   1
   9  -1   2 5.63014 4.56600   1
  10  -1   2 55.4941 18.8176   1
  11  -1   2 -7.0311 4.43050   1
  12  -1   2 1.96343 7.03096   1
  13  -1   2 -5.2302 8.48334   1
 -13   0   2 21.5019 10.8378   1
 -12   0   2 185.349 45.1239   1
 -11   0   2 195.659 27.7286   1
 -10   0   2 -1.8602 3.99730   1
   9  -9   2 798.960 29.6874  -2
  -9   0   2 798.960 29.6874   1
   8  -8   2 1875.98 44.7147  -2
  -8   0   2 1875.98 44.7147   1
   7  -7   2 2434.77 64.4947  -2
  -7   0   2 2434.77 64.4947   1
   6  -6   2 1148.49 24.4469  -2
  -6   0   2 1148.49 24.4469   1
   5  -5   2 91.5059 5.88520  -2
  -5   0   2 91.5059 5.88520   1
   4  -4   2 130.347 5.16364  -2
  -4   0   2 130.347 5.16364   1
   3  -3   2 398.842 9.96502  -2
  -3   0   2 398.842 9.96502   1
   2  -2   2 46.5903 1.92335  -2
  -2   0   2 46.5903 1.92335   1
   1  -1   2 955.557 22.5809  -2
  -1   0   2 955.557 22.5809   1
   0   0   2 9194.96 347.877  -2
   0   0   2 9194.96 347.877   1
  -1   1   2 5824.89 167.751  -2
   1   0   2 5824.89 167.751   1
  -2   2   2 784.751 20.7631  -2
   2   0   2 784.751 20.7631   1
  -3   3   2 3308.33 60.3634  -2
   3   0   2 3308.33 60.3634   1
  -4   4   2 1613.73 33.6879  -2
   4   0   2 1613.73 33.6879   1
  -5   5   2 676.196 23.3489  -2
   5   0   2 676.196 23.3489   1
  -6   6   2 209.395 23.1002  -2
   6   0   2 209.395 23.1002   1
   7   0   2 6.80131 1.92093   1
   8   0   2 8.78317 2.80741   1
   9   0   2 262.758 16.4541   1
  10   0   2 -4.3545 8.57315   1
  11   0   2 13.6367 7.23615   1
  12   0   2 115.536 30.1556   1
  13   0   2 26.6148 9.15326   1
 -14   1   2 -1.9931 7.89655   1
 -13   1   2 14.0684 8.32690   1
 -12   1   2 348.494 36.1633   1
  11 -10   2 244.646 33.0619  -2
 -11   1   2 244.646 33.0619   1
  10  -9   2 118.562 18.9069  -2
 -10   1   2 118.562 18.9069   1
   9  -8   2 310.098 22.6907  -2
  -9   1   2 310.098 22.6907   1
   8  -7   2 1550.50 32.2839  -2
  -8   1   2 1550.50 32.2839   1
   7  -6   2 1524.46 35.4241  -2
  -7   1   2 1524.46 35.4241   1
   6  -5   2 899.898 18.3671  -2
  -6   1   2 899.898 18.3671   1
   5  -4   2 233.490 9.21026  -2
  -5   1   2 233.490 9.21026   1
   4  -3   2 2758.60 48.2866  -2
  -4   1   2 2758.60 48.2866   1
   3  -2   2 3845.00 65.4401  -2
  -3   1   2 3845.00 65.4401   1
   2  -1   2 410.289 24.1146  -2
  -2   1   2 410.289 24.1146   1
   1   0   2 5869.93 142.336  -2
  -1   1   2 5869.93 142.336   1
   0   1   2 4193.81 59.9560   1
   1   1   2 9999.99 143.036   1
  -2   3   2 1720.91 55.1785  -2
   2   1   2 1720.91 55.1785   1
  -3   4   2 806.964 31.5662  -2
   3   1   2 806.964 31.5662   1
   4   1   2 131.161 6.43051   1
   5   1   2 966.663 20.8085   1
   6   1   2 166.884 8.52584   1
   7   1   2 166.305 7.53030   1
   8   1   2 458.158 21.0578   1
   9   1   2 418.365 21.1731   1
  10   1   2 11.3788 4.53033   1
  11   1   2 4.50216 7.91419   1
  12   1   2 151.618 32.4261   1
 -14   2   2 147.267 34.7434   1
  13 -11   2 25.0734 27.7685  -2
 -13   2   2 25.0734 27.7685   1
  11  -9   2 259.417 31.6257  -2
 -11   2   2 259.417 31.6257   1
  10  -8   2 620.518 31.5897  -2
 -10   2   2 620.518 31.5897   1
   9  -7   2 874.053 25.3440  -2
  -9   2   2 874.053 25.3440   1
   8  -6   2 297.908 11.0554  -2
  -8   2   2 297.908 11.0554   1
   7  -5   2 28.9117 4.61051  -2
  -7   2   2 28.9117 4.61051   1
   6  -4   2 226.276 9.11412  -2
  -6   2   2 226.276 9.11412   1
   5  -3   2 115.092 5.42056  -2
  -5   2   2 115.092 5.42056   1
   4  -2   2 2629.41 56.7522  -2
  -4   2   2 2629.41 56.7522   1
   3  -1   2 2505.17 72.1096  -2
  -3   2   2 2505.17 72.1096   1
   2   0   2 975.985 25.7854  -2
  -2   2   2 975.985 25.7854   1
  -1   2   2 5064.99 71.6334   1
   0   2   2 1541.77 49.7920  -2
   0   2   2 1541.77 49.7920   1
  -1   3   2 7205.46 211.684  -2
   1   2   2 7205.46 211.684   1
   2   2   2 666.493 12.1740   1
   3   2   2 18.3845 2.07985   1
   4   2   2 65.3552 4.37565   1
   5   2   2 0.79615 1.25498   1
   6   2   2 107.543 6.41170   1
   7   2   2 418.422 19.2741   1
   8   2   2 692.449 28.3406   1
   9   2   2 515.249 23.9544   1
  10   2   2 111.611 14.9606   1
  11   2   2 3.27294 6.25229   1
  12   2   2 32.8775 12.2490   1
  14 -11   2 94.7135 32.7565  -2
 -14   3   2 94.7135 32.7565   1
  13 -10   2 30.1849 25.8484  -2
 -13   3   2 30.1849 25.8484   1
  12  -9   2 27.4547 21.7819  -2
 -12   3   2 27.4547 21.7819   1
  11  -8   2 -15.031 18.0765  -2
 -11   3   2 -15.031 18.0765   1
  10  -7   2 143.808 15.1819  -2
 -10   3   2 143.808 15.1819   1
   9  -6   2 122.869 8.44293  -2
  -9   3   2 122.869 8.44293   1
   8  -5   2 34.1803 5.07581  -2
  -8   3   2 34.1803 5.07581   1
   7  -4   2 582.985 16.8976  -2
  -7   3   2 582.985 16.8976   1
   6  -3   2 313.916 16.0658  -2
  -6   3   2 313.916 16.0658   1
   5  -2   2 840.151 22.9451  -2
  -5   3   2 840.151 22.9451   1
   4  -1   2 2404.06 100.390  -2
  -4   3   2 2404.06 100.390   1
   3   0   2 3199.01 75.9039  -2
  -3   3   2 3199.01 75.9039   1
   2   1   2 1861.28 60.0468  -2
  -2   3   2 1861.28 60.0468   1
  -1   3   2 2313.58 34.5701   1
   0   3   2 1133.55 15.6765   1
   1   3   2 1739.67 23.3850   1
   2   3   2 61.0471 3.68135   1
   3   3   2 396.059 9.71706   1
   4   3   2 121.758 5.83526   1
   5   3   2 281.369 10.6165   1
   6   3   2 -2.2100 1.73856   1
   7   3   2 371.486 19.0432   1
   8   3   2 954.558 33.4451   1
   9   3   2 886.921 36.5540   1
  10   3   2 32.9670 7.10616   1
  11   3   2 27.0741 7.13967   1
  14 -10   2 12.7630 24.6013  -2
 -14   4   2 12.7630 24.6013   1
  12  -8   2 -4.7810 17.7690  -2
 -12   4   2 -4.7810 17.7690   1
  11  -7   2 129.209 15.9180  -2
 -11   4   2 129.209 15.9180   1
  10  -6   2 531.550 21.1384  -2
 -10   4   2 531.550 21.1384   1
   9  -5   2 471.890 14.7159  -2
  -9   4   2 471.890 14.7159   1
   8  -4   2 102.016 11.3859  -2
  -8   4   2 102.016 11.3859   1
   7  -3   2 768.263 23.3274  -2
  -7   4   2 768.263 23.3274   1
   6  -2   2 695.182 25.3991  -2
  -6   4   2 695.182 25.3991   1
   5  -1   2 1207.25 35.5344  -2
  -5   4   2 1207.25 35.5344   1
   4   0   2 1480.71 39.1217  -2
  -4   4   2 1480.71 39.1217   1
   3   1   2 768.028 29.3594  -2
  -3   4   2 768.028 29.3594   1
  -2   4   2 2.17612 1.12304   1
  -1   4   2 881.532 14.1575   1
   0   4   2 542.430 9.34785   1
   1   4   2 162.322 4.90338   1
   2   4   2 494.793 9.91360   1
   3   4   2 539.695 12.2582   1
   4   4   2 507.167 12.6335   1
   5   4   2 351.935 12.8799   1
   6   4   2 0.95260 2.39731   1
   7   4   2 265.236 18.2020   1
   8   4   2 443.096 24.6031   1
   9   4   2 191.254 18.6580   1
  10   4   2 56.5915 14.3217   1
  14  -9   2 71.1409 25.5426  -2
 -14   5   2 71.1409 25.5426   1
  11  -6   2 510.292 26.2500  -2
 -11   5   2 510.292 26.2500   1
  10  -5   2 1867.67 58.6191  -2
 -10   5   2 1867.67 58.6191   1
   9  -4   2 403.587 22.3705  -2
  -9   5   2 403.587 22.3705   1
   8  -3   2 275.481 25.5942  -2
  -8   5   2 275.481 25.5942   1
   7  -2   2 1141.15 36.7973  -2
  -7   5   2 1141.15 36.7973   1
   6  -1   2 159.483 11.9222  -2
  -6   5   2 159.483 11.9222   1
   5   0   2 551.832 19.8514  -2
  -5   5   2 551.832 19.8514   1
   4   1   2 169.836 14.0025  -2
  -4   5   2 169.836 14.0025   1
  -3   5   2 59.1998 4.27838   1
  -2   5   2 128.331 5.12160   1
  -1   5   2 21.5881 2.76194   1
   0   5   2 263.916 7.72396   1
   1   5   2 190.993 5.67641   1
   2   5   2 300.443 7.97153   1
   3   5   2 123.606 6.21680   1
   4   5   2 225.497 9.70050   1
   5   5   2 607.523 21.3923   1
   6   5   2 87.8358 12.4082   1
   7   5   2 26.7054 6.32291   1
   8   5   2 443.619 25.2820   1
   9   5   2 110.834 16.0322   1
  10   5   2 -0.6971 5.49906   1
  14  -8   2 285.561 32.9003  -2
 -14   6   2 285.561 32.9003   1
  12  -6   2 197.004 17.9640  -2
 -12   6   2 197.004 17.9640   1
  11  -5   2 1065.34 40.0299  -2
 -11   6   2 1065.34 40.0299   1
  10  -4   2 2279.68 68.8299  -2
 -10   6   2 2279.68 68.8299   1
   9  -3   2 315.272 20.5237  -2
  -9   6   2 315.272 20.5237   1
   8  -2   2 712.986 27.9375  -2
  -8   6   2 712.986 27.9375   1
   7  -1   2 42.0912 9.49343  -2
  -7   6   2 42.0912 9.49343   1
  -6   6   2 218.758 8.22304   1
  -5   6   2 38.6354 3.90222   1
  -4   6   2 -0.7953 1.57990   1
  -3   6   2 281.585 8.39087   1
  -2   6   2 3296.65 45.9040   1
  -1   6   2 4.45684 1.23151   1
   0   6   2 113.910 4.96309   1
   1   6   2 658.607 12.3817   1
   2   6   2 148.685 5.90385   1
   3   6   2 3.75204 2.08802   1
   4   6   2 83.5092 7.59179   1
   5   6   2 256.946 13.6631   1
   6   6   2 37.6501 6.58428   1
   7   6   2 18.3076 5.88668   1
   8   6   2 85.8801 15.5277   1
   9   6   2 -4.1984 5.19035   1
  14  -7   2 752.790 51.9316  -2
 -14   7   2 752.790 51.9316   1
  13  -6   2 278.282 20.0200  -2
 -13   7   2 278.282 20.0200   1
  12  -5   2 107.906 14.5456  -2
 -12   7   2 107.906 14.5456   1
  11  -4   2 852.712 35.4757  -2
 -11   7   2 852.712 35.4757   1
  10  -3   2 1709.41 55.5879  -2
 -10   7   2 1709.41 55.5879   1
   9  -2   2 277.221 32.9661  -2
  -9   7   2 277.221 32.9661   1
   8  -1   2 -21.815 17.5474  -2
  -8   7   2 -21.815 17.5474   1
  -7   7   2 2.20852 1.54712   1
  -6   7   2 109.892 6.21232   1
  -5   7   2 -1.4430 1.11842   1
  -4   7   2 152.447 9.05701   1
  -3   7   2 696.504 15.4245   1
  -2   7   2 2100.23 35.5426   1
  -1   7   2 106.801 5.58757   1
   0   7   2 44.9478 3.98546   1
   1   7   2 296.637 8.18792   1
   2   7   2 346.541 10.4135   1
   3   7   2 360.899 12.7560   1
   4   7   2 125.939 10.6176   1
   5   7   2 73.7894 12.0601   1
   6   7   2 2.69603 4.31140   1
   7   7   2 -1.6388 3.83016   1
   8   7   2 -2.1912 4.63597   1
  14  -6   2 623.383 46.6044  -2
 -14   8   2 623.383 46.6044   1
  13  -5   2 267.151 22.7459  -2
 -13   8   2 267.151 22.7459   1
  12  -4   2 401.001 24.3267  -2
 -12   8   2 401.001 24.3267   1
  11  -3   2 627.466 30.6827  -2
 -11   8   2 627.466 30.6827   1
 -10   8   2 335.070 21.2520   1
  -9   8   2 260.982 14.3059   1
  -8   8   2 114.496 7.86023   1
  -7   8   2 274.229 10.4534   1
  -6   8   2 520.523 14.1892   1
  -5   8   2 168.974 7.88632   1
  -4   8   2 322.744 14.2150   1
  -3   8   2 1317.65 22.4600   1
  -2   8   2 1637.20 26.9361   1
  -1   8   2 956.998 17.9360   1
   0   8   2 -0.9306 1.34157   1
   1   8   2 228.326 9.21048   1
   2   8   2 225.158 8.74254   1
   3   8   2 67.6314 8.26532   1
   4   8   2 34.6178 5.27878   1
   5   8   2 19.7887 5.40626   1
   6   8   2 11.2010 5.12126   1
   7   8   2 83.5726 20.5064   1
  14  -5   2 511.930 37.3276  -2
 -14   9   2 511.930 37.3276   1
  13  -4   2 49.9557 18.2909  -2
 -13   9   2 49.9557 18.2909   1
  12  -3   2 88.1618 23.1729  -2
 -12   9   2 88.1618 23.1729   1
 -11   9   2 105.425 11.7310   1
 -10   9   2 54.8332 6.50401   1
  -9   9   2 73.2762 7.34931   1
  -8   9   2 202.192 11.8011   1
  -7   9   2 802.910 20.5553   1
  -6   9   2 736.280 21.5935   1
  -5   9   2 292.296 11.1430   1
  -4   9   2 10.0608 1.91926   1
  -3   9   2 473.686 11.6838   1
  -2   9   2 1346.85 26.1365   1
  -1   9   2 445.611 12.7322   1
   0   9   2 3.91766 1.93549   1
   1   9   2 1.53022 1.93093   1
   2   9   2 3.96976 2.17386   1
   3   9   2 3.18271 3.26960   1
   4   9   2 8.99232 4.02490   1
   5   9   2 44.8710 7.57695   1
   6   9   2 185.941 18.6729   1
  14  -4   2 258.863 33.6488  -2
 -14  10   2 258.863 33.6488   1
  13  -3   2 -1.1519 22.5086  -2
 -13  10   2 -1.1519 22.5086   1
 -12  10   2 6.32377 3.21135   1
 -11  10   2 40.6258 5.80958   1
 -10  10   2 15.6273 3.33950   1
  -9  10   2 13.9817 3.25246   1
  -8  10   2 247.027 11.1422   1
  -7  10   2 295.749 11.6100   1
  -6  10   2 801.688 21.2343   1
  -5  10   2 270.340 10.8107   1
  -4  10   2 1.10304 1.61165   1
  -3  10   2 493.605 13.9049   1
  -2  10   2 43.6060 4.78885   1
  -1  10   2 294.219 10.6197   1
   0  10   2 58.7698 5.81152   1
   1  10   2 172.555 10.6595   1
   2  10   2 216.054 11.9039   1
   3  10   2 85.7684 13.9603   1
   4  10   2 16.2774 4.82546   1
   5  10   2 325.198 22.1332   1
 -13  11   2 23.9553 4.42539   1
 -12  11   2 7.11397 3.38454   1
 -11  11   2 0.40503 2.75431   1
 -10  11   2 113.807 9.30679   1
  -9  11   2 267.201 13.2019   1
  -8  11   2 7.36186 2.67360   1
  -7  11   2 396.444 14.7388   1
  -6  11   2 705.546 21.2114   1
  -5  11   2 312.905 10.3491   1
  -4  11   2 8.28419 2.45518   1
  -3  11   2 133.216 9.89727   1
  -2  11   2 164.780 10.8942   1
  -1  11   2 160.992 9.20774   1
   0  11   2 40.4720 7.34511   1
   1  11   2 271.426 23.0168   1
   2  11   2 220.680 13.3406   1
   3  11   2 71.3464 19.4865   1
 -13  12   2 135.845 11.7949   1
 -12  12   2 12.7017 3.71311   1
 -11  12   2 -3.8483 2.84938   1
  11   1   2 121.408 27.8066  -2
 -10  12   2 121.408 27.8066   1
  -9  12   2 3.43596 2.91147   1
  -8  12   2 8.24725 2.68278   1
  -7  12   2 125.032 9.06857   1
  -6  12   2 193.883 10.3387   1
  -5  12   2 45.5347 4.60137   1
  -4  12   2 0.91343 1.40460   1
  -3  12   2 122.577 7.51650   1
  -2  12   2 0.42403 3.86946   1
  -1  12   2 24.0567 3.62243   1
   0  12   2 99.9349 12.5738   1
   1  12   2 129.149 13.7723   1
   2  12   2 283.013 19.3665   1
  13   0   2 57.0833 29.5975  -2
 -12  13   2 57.0833 29.5975   1
 -11  13   2 -2.3683 3.68273   1
 -10  13   2 -6.0964 3.09290   1
  -9  13   2 87.1869 9.23067   1
  -8  13   2 5.31448 2.67890   1
  -7  13   2 100.814 7.24932   1
  -6  13   2 45.9093 4.80837   1
  -5  13   2 6.15410 1.48698   1
  -4  13   2 5.76463 4.57297   1
  -3  13   2 0.52558 4.63347   1
  -2  13   2 0.64856 3.63727   1
  -1  13   2 8.54116 4.50907   1
   0  13   2 10.5424 4.98652   1
  11   3   2 -3.3144 23.2397  -2
 -10  14   2 -3.3144 23.2397   1
  -9  14   2 4.33704 3.58055   1
  -8  14   2 7.66368 2.93254   1
  -7  14   2 28.9603 5.24296   1
  -6  14   2 5.91724 5.45666   1
  -5  14   2 32.3712 6.64223   1
  -4  14   2 72.8377 12.2253   1
  -3  14   2 7.26222 4.68881   1
  -2  14   2 -6.0804 3.51086   1
   5 -16   3 58.5752 10.1822   1
   6 -16   3 -6.8709 6.54559   1
   7 -16   3 13.5943 5.99532   1
   8 -16   3 20.4442 6.32427   1
   2 -15   3 12.5681 5.99422   1
   3 -15   3 317.093 21.4070   1
   4 -15   3 404.813 23.4447   1
   5 -15   3 280.214 19.8740   1
   6 -15   3 22.3822 5.57018   1
   7 -15   3 -2.7238 4.10889   1
   8 -15   3 9.08893 4.93837   1
   9 -15   3 -4.1824 5.23014   1
  10 -15   3 0.76497 3.12853   1
 -12  -3   3 274.481 37.7685  -2
  11 -15   3 274.481 37.7685   1
  -1 -14   3 270.078 19.5822   1
   0 -14   3 424.450 23.6149   1
   1 -14   3 25.2039 5.93879   1
   2 -14   3 -3.9963 3.83661   1
   3 -14   3 230.247 17.3990   1
   4 -14   3 596.500 38.9441   1
   5 -14   3 456.630 23.4352   1
   6 -14   3 111.285 13.4522   1
   7 -14   3 -2.9399 3.89144   1
   8 -14   3 20.9494 5.56494   1
   9 -14   3 1.91721 2.75229   1
 -11  -3   3 43.7562 27.5143  -2
  10 -14   3 43.7562 27.5143   1
  11 -14   3 464.328 20.0243   1
  12 -14   3 400.506 16.9283   1
  -2 -13   3 78.9310 13.4638   1
  -1 -13   3 198.569 16.7351   1
   0 -13   3 134.188 14.2685   1
   1 -13   3 226.414 18.9316   1
   2 -13   3 -0.0387 3.68432   1
   3 -13   3 181.612 15.5427   1
   4 -13   3 333.098 19.5413   1
   5 -13   3 116.061 13.1666   1
   6 -13   3 91.6488 12.4236   1
   7 -13   3 489.393 23.8848   1
   8 -13   3 402.423 15.4761   1
 -10  -3   3 187.166 29.0151  -2
   9 -13   3 187.166 29.0151   1
  10 -13   3 76.8020 7.95205   1
  11 -13   3 404.956 17.0068   1
  12 -13   3 514.901 19.6082   1
  13 -13   3 144.977 18.5452   1
  -4 -12   3 98.5438 11.1820   1
  -3 -12   3 149.787 11.0764   1
  -2 -12   3 18.0911 5.58474   1
  -1 -12   3 103.999 12.5873   1
   0 -12   3 401.344 20.9372   1
   1 -12   3 91.5301 11.8323   1
   2 -12   3 22.6165 5.33375   1
   3 -12   3 186.588 14.8080   1
   4 -12   3 52.5168 10.0379   1
   5 -12   3 1.56700 3.58013   1
   6 -12   3 221.590 15.6630   1
   7 -12   3 306.949 12.6562   1
   8 -12   3 657.397 21.1512   1
   9 -12   3 256.743 14.0140   1
  10 -12   3 4.71235 3.53246   1
  11 -12   3 444.208 20.4690   1
  12 -12   3 559.414 30.9025   1
  13 -12   3 235.790 21.9073   1
  -5 -11   3 4.47488 3.73680   1
  -4 -11   3 19.9868 4.36273   1
  -3 -11   3 30.1011 5.20687   1
  -2 -11   3 1.77475 2.22514   1
  -1 -11   3 5.94414 3.51230   1
   0 -11   3 132.036 12.6293   1
   1 -11   3 5.78512 3.41002   1
   2 -11   3 26.7278 5.61557   1
   3 -11   3 9.78184 3.75344   1
   4 -11   3 -0.0865 2.53979   1
   5 -11   3 56.2741 9.66979   1
   6 -11   3 13.3675 2.30666   1
   7 -11   3 457.980 16.3029   1
   8 -11   3 776.989 23.6266   1
   9 -11   3 187.455 15.7939   1
  10 -11   3 1.00079 2.69222   1
  11 -11   3 151.480 12.4196   1
 -12   1   3 150.824 30.6737  -2
  12 -11   3 150.824 30.6737   1
 -13   2   3 48.1720 28.7327  -2
  13 -11   3 48.1720 28.7327   1
 -14   3   3 3.73565 28.1719  -2
  14 -11   3 3.73565 28.1719   1
  -6 -10   3 216.056 18.1325   1
  -5 -10   3 87.3522 11.9475   1
  -4 -10   3 -0.1968 2.69914   1
  -3 -10   3 0.03800 2.24833   1
  -2 -10   3 0.52107 1.92893   1
  -1 -10   3 56.2158 5.92624   1
   0 -10   3 80.5389 10.2548   1
   1 -10   3 369.961 18.1872   1
   2 -10   3 471.237 17.1890   1
   3 -10   3 75.7521 9.60582   1
   4 -10   3 264.235 12.7726   1
   5 -10   3 149.585 7.02369   1
   6 -10   3 32.3769 5.04730   1
   7 -10   3 262.272 12.7866   1
   8 -10   3 516.213 23.6128   1
   9 -10   3 245.417 13.8188   1
 -10   0   3 -0.0903 12.2526  -2
  10 -10   3 -0.0903 12.2526   1
 -11   1   3 14.2090 15.9810  -2
  11 -10   3 14.2090 15.9810   1
 -12   2   3 16.6021 16.5171  -2
  12 -10   3 16.6021 16.5171   1
 -13   3   3 34.5440 26.7307  -2
  13 -10   3 34.5440 26.7307   1
  -7  -9   3 208.685 18.1955   1
  -6  -9   3 205.256 25.3151   1
  -5  -9   3 129.298 11.8525   1
  -4  -9   3 67.5030 8.61532   1
  -3  -9   3 125.813 9.15493   1
  -2  -9   3 277.816 11.8757   1
  -1  -9   3 160.531 8.20568   1
   0  -9   3 82.5613 8.15966   1
   1  -9   3 685.448 17.8140   1
   2  -9   3 677.878 20.1978   1
   3  -9   3 7.09697 2.84862   1
   4  -9   3 179.703 10.3107   1
   5  -9   3 156.796 7.87142   1
   6  -9   3 0.72641 1.71234   1
   7  -9   3 255.618 15.1717   1
   8  -9   3 148.080 9.77439   1
  -9   0   3 137.929 12.3436  -2
   9  -9   3 137.929 12.3436   1
 -10   1   3 24.3011 14.0172  -2
  10  -9   3 24.3011 14.0172   1
 -11   2   3 129.859 26.2673  -2
  11  -9   3 129.859 26.2673   1
 -13   4   3 82.3202 26.9925  -2
  13  -9   3 82.3202 26.9925   1
  -8  -8   3 -6.8742 4.35977   1
  -7  -8   3 40.4630 7.48294   1
  -6  -8   3 168.360 15.6474   1
  -5  -8   3 55.2653 10.9675   1
  -4  -8   3 337.667 14.4339   1
  -3  -8   3 814.575 22.3935   1
  -2  -8   3 1071.73 25.7679   1
  -1  -8   3 74.8079 4.78296   1
   0  -8   3 788.688 17.8717   1
   1  -8   3 1725.82 31.9122   1
   2  -8   3 798.111 21.2598   1
   3  -8   3 77.5771 6.83236   1
  -4  -4   3 304.953 24.0067  -2
   4  -8   3 304.953 24.0067   1
   5  -8   3 4.15128 4.13591   1
  -6  -2   3 23.6079 11.4143  -2
   6  -8   3 23.6079 11.4143   1
  -7  -1   3 44.7399 8.97406  -2
   7  -8   3 44.7399 8.97406   1
  -8   0   3 19.1022 6.87083  -2
   8  -8   3 19.1022 6.87083   1
  -9   1   3 694.629 27.0377  -2
   9  -8   3 694.629 27.0377   1
 -10   2   3 1076.63 57.1675  -2
  10  -8   3 1076.63 57.1675   1
 -11   3   3 -7.7338 19.3565  -2
  11  -8   3 -7.7338 19.3565   1
 -12   4   3 117.749 26.9526  -2
  12  -8   3 117.749 26.9526   1
 -13   5   3 -6.0231 18.3102  -2
  13  -8   3 -6.0231 18.3102   1
 -14   6   3 -18.100 19.7762  -2
  14  -8   3 -18.100 19.7762   1
  -9  -7   3 80.9292 19.0849   1
  -8  -7   3 -4.4378 3.98703   1
  -7  -7   3 -1.9188 3.57999   1
  -6  -7   3 14.5432 4.89368   1
  -5  -7   3 84.1752 8.78013   1
  -4  -7   3 928.841 24.7632   1
  -3  -7   3 1772.61 30.1373   1
  -2  -7   3 1590.54 26.5863   1
  -1  -7   3 465.520 11.7072   1
   0  -7   3 368.585 8.46652   1
   1  -7   3 1700.44 30.5920   1
   2  -7   3 1827.71 37.7637   1
  -3  -4   3 3373.06 111.890  -2
   3  -7   3 3373.06 111.890   1
  -4  -3   3 75.7538 16.1693  -2
   4  -7   3 75.7538 16.1693   1
  -5  -2   3 468.716 18.0619  -2
   5  -7   3 468.716 18.0619   1
  -6  -1   3 613.691 17.4362  -2
   6  -7   3 613.691 17.4362   1
  -7   0   3 434.903 18.6441  -2
   7  -7   3 434.903 18.6441   1
  -8   1   3 263.780 15.5612  -2
   8  -7   3 263.780 15.5612   1
  -9   2   3 1415.01 57.8299  -2
   9  -7   3 1415.01 57.8299   1
 -10   3   3 853.528 50.9181  -2
  10  -7   3 853.528 50.9181   1
 -11   4   3 60.5595 20.3735  -2
  11  -7   3 60.5595 20.3735   1
 -13   6   3 209.088 32.4817  -2
  13  -7   3 209.088 32.4817   1
 -10  -6   3 15.8840 8.08167   1
  -9  -6   3 6.75553 4.98876   1
  -8  -6   3 9.28182 4.75510   1
  -7  -6   3 27.4259 5.65914   1
  -6  -6   3 13.9993 3.25603   1
  -5  -6   3 -0.6050 1.78256   1
  -4  -6   3 866.309 15.9785   1
  -3  -6   3 2351.22 36.2039   1
  -2  -6   3 2757.21 39.2629   1
  -1  -6   3 327.675 8.23311   1
   0  -6   3 75.9426 3.62320   1
   1  -6   3 599.426 13.3108   1
   2  -6   3 354.526 11.7851   1
  -3  -3   3 612.687 21.9880  -2
   3  -6   3 612.687 21.9880   1
  -4  -2   3 2220.73 43.1035  -2
   4  -6   3 2220.73 43.1035   1
  -5  -1   3 4018.53 74.4474  -2
   5  -6   3 4018.53 74.4474   1
  -6   0   3 3497.29 60.4693  -2
   6  -6   3 3497.29 60.4693   1
  -7   1   3 148.680 11.1609  -2
   7  -6   3 148.680 11.1609   1
  -8   2   3 422.585 30.4580  -2
   8  -6   3 422.585 30.4580   1
  -9   3   3 1485.14 45.4862  -2
   9  -6   3 1485.14 45.4862   1
 -10   4   3 927.315 53.8340  -2
  10  -6   3 927.315 53.8340   1
 -12   6   3 -10.383 20.2011  -2
  12  -6   3 -10.383 20.2011   1
 -14   8   3 -22.988 27.0376  -2
  14  -6   3 -22.988 27.0376   1
 -11  -5   3 -0.0729 6.77386   1
 -10  -5   3 -7.4275 5.37711   1
  -9  -5   3 0.25309 4.04938   1
  -8  -5   3 -1.2056 3.72560   1
  -7  -5   3 154.814 13.9579   1
  -6  -5   3 374.519 15.8116   1
  -5  -5   3 4.01404 1.60480   1
  -4  -5   3 234.193 7.88134   1
  -3  -5   3 1162.91 19.7832   1
  -2  -5   3 1684.98 25.4407   1
  -1  -5   3 272.075 7.00247   1
   0  -5   3 2.03713 0.76056   1
  -1  -4   3 360.327 21.7545  -2
   1  -5   3 360.327 21.7545   1
  -2  -3   3 100.942 7.79265  -2
   2  -5   3 100.942 7.79265   1
  -3  -2   3 135.071 6.46299  -2
   3  -5   3 135.071 6.46299   1
  -4  -1   3 2228.07 46.7701  -2
   4  -5   3 2228.07 46.7701   1
  -5   0   3 5491.74 105.559  -2
   5  -5   3 5491.74 105.559   1
  -6   1   3 3816.77 89.0467  -2
   6  -5   3 3816.77 89.0467   1
  -7   2   3 232.460 13.4325  -2
   7  -5   3 232.460 13.4325   1
  -8   3   3 767.144 37.1003  -2
   8  -5   3 767.144 37.1003   1
  -9   4   3 1690.99 76.2528  -2
   9  -5   3 1690.99 76.2528   1
 -10   5   3 719.256 48.6384  -2
  10  -5   3 719.256 48.6384   1
 -11   6   3 79.3272 25.7674  -2
  11  -5   3 79.3272 25.7674   1
 -14   9   3 104.607 36.5822  -2
  14  -5   3 104.607 36.5822   1
 -10  -4   3 6.41535 6.13024   1
  -9  -4   3 122.575 17.8259   1
  -8  -4   3 0.82688 4.07521   1
  -7  -4   3 257.505 11.2655   1
  -6  -4   3 310.207 11.6450   1
  -5  -4   3 98.7368 5.53362   1
  -4  -4   3 324.127 7.95365   1
  -3  -4   3 2910.06 40.0132   1
   2  -6   3 1116.84 24.8886  -2
  -2  -4   3 1116.84 24.8886   1
   1  -5   3 444.381 12.1700  -2
  -1  -4   3 444.381 12.1700   1
   0  -4   3 22.8728 2.73536   1
  -1  -3   3 1444.90 34.9785  -2
   1  -4   3 1444.90 34.9785   1
  -2  -2   3 5989.78 127.617  -2
   2  -4   3 5989.78 127.617   1
  -3  -1   3 332.475 9.06853  -2
   3  -4   3 332.475 9.06853   1
  -4   0   3 4144.97 80.7027  -2
   4  -4   3 4144.97 80.7027   1
  -5   1   3 5563.00 123.899  -2
   5  -4   3 5563.00 123.899   1
  -6   2   3 4184.60 97.5658  -2
   6  -4   3 4184.60 97.5658   1
  -7   3   3 434.314 19.2704  -2
   7  -4   3 434.314 19.2704   1
  -8   4   3 532.031 30.0642  -2
   8  -4   3 532.031 30.0642   1
  -9   5   3 595.893 42.2014  -2
   9  -4   3 595.893 42.2014   1
 -10   6   3 357.854 37.8941  -2
  10  -4   3 357.854 37.8941   1
 -11   7   3 30.6683 27.1087  -2
  11  -4   3 30.6683 27.1087   1
 -12   8   3 242.455 36.6049  -2
  12  -4   3 242.455 36.6049   1
 -13   9   3 169.909 37.4811  -2
  13  -4   3 169.909 37.4811   1
 -14  10   3 44.7002 36.3930  -2
  14  -4   3 44.7002 36.3930   1
 -12  -3   3 17.4917 6.40823   1
 -11  -3   3 -4.2577 5.72494   1
 -10  -3   3 41.9425 7.38137   1
  -9  -3   3 262.967 18.0779   1
  -8  -3   3 -0.1195 2.22850   1
  -7  -3   3 127.503 7.46195   1
  -6  -3   3 211.111 7.85339   1
  -5  -3   3 6.37275 1.43691   1
   4  -7   3 108.033 10.6160  -2
  -4  -3   3 108.033 10.6160   1
   3  -6   3 534.405 14.7607  -2
  -3  -3   3 534.405 14.7607   1
   2  -5   3 85.7537 5.56794  -2
  -2  -3   3 85.7537 5.56794   1
   1  -4   3 1604.29 34.7243  -2
  -1  -3   3 1604.29 34.7243   1
   0  -3   3 118.322 5.54583  -2
   0  -3   3 118.322 5.54583   1
  -1  -2   3 2046.32 41.6626  -2
   1  -3   3 2046.32 41.6626   1
  -2  -1   3 2325.42 46.4338  -2
   2  -3   3 2325.42 46.4338   1
  -3   0   3 799.937 19.0401  -2
   3  -3   3 799.937 19.0401   1
  -4   1   3 3199.00 74.0087  -2
   4  -3   3 3199.00 74.0087   1
  -5   2   3 4121.83 94.9872  -2
   5  -3   3 4121.83 94.9872   1
  -6   3   3 3134.79 77.1250  -2
   6  -3   3 3134.79 77.1250   1
  -7   4   3 647.125 38.4892  -2
   7  -3   3 647.125 38.4892   1
  -8   5   3 83.4207 8.62664  -2
   8  -3   3 83.4207 8.62664   1
  -9   6   3 76.3059 23.9691  -2
   9  -3   3 76.3059 23.9691   1
 -11   8   3 111.041 30.8604  -2
  11  -3   3 111.041 30.8604   1
  13  -3   3 564.974 51.1044   1
  14  -3   3 559.289 53.3993   1
 -12  -2   3 369.285 39.2960   1
 -11  -2   3 5.06273 3.91803   1
 -10  -2   3 199.169 16.1633   1
  -9  -2   3 78.9240 9.96665   1
  -8  -2   3 42.0938 7.22165   1
  -7  -2   3 15.1817 2.27932   1
  -6  -2   3 0.40899 1.23691   1
   5  -7   3 498.658 12.5873  -2
  -5  -2   3 498.658 12.5873   1
   4  -6   3 2157.63 33.5327  -2
  -4  -2   3 2157.63 33.5327   1
   3  -5   3 145.712 7.93270  -2
  -3  -2   3 145.712 7.93270   1
   2  -4   3 6574.39 90.7819  -2
  -2  -2   3 6574.39 90.7819   1
   1  -3   3 1814.14 28.7818  -2
  -1  -2   3 1814.14 28.7818   1
   0  -2   3 141.558 5.57050  -2
   0  -2   3 141.558 5.57050   1
  -1  -1   3 2170.40 36.6050  -2
   1  -2   3 2170.40 36.6050   1
  -2   0   3 5367.48 92.1683  -2
   2  -2   3 5367.48 92.1683   1
  -3   1   3 1540.50 42.6546  -2
   3  -2   3 1540.50 42.6546   1
  -4   2   3 3533.60 71.2663  -2
   4  -2   3 3533.60 71.2663   1
  -5   3   3 6314.24 141.142  -2
   5  -2   3 6314.24 141.142   1
  -6   4   3 2184.28 57.6352  -2
   6  -2   3 2184.28 57.6352   1
  -7   5   3 57.6429 10.7249  -2
   7  -2   3 57.6429 10.7249   1
  -8   6   3 33.3684 8.62704  -2
   8  -2   3 33.3684 8.62704   1
  -9   7   3 3.33366 19.6246  -2
   9  -2   3 3.33366 19.6246   1
  10  -2   3 10.6357 5.55755   1
  11  -2   3 5.71794 7.54686   1
  12  -2   3 293.859 32.4892   1
  13  -2   3 411.367 31.7195   1
 -13  -1   3 647.784 52.3827   1
 -12  -1   3 260.660 33.8552   1
 -11  -1   3 16.5444 7.35569   1
 -10  -1   3 90.8006 11.4097   1
  -9  -1   3 317.746 14.1219   1
  -8  -1   3 5.87847 2.12940   1
   7  -8   3 56.9462 9.97246  -2
  -7  -1   3 56.9462 9.97246   1
   6  -7   3 709.805 17.0580  -2
  -6  -1   3 709.805 17.0580   1
   5  -6   3 3747.08 61.1966  -2
  -5  -1   3 3747.08 61.1966   1
   4  -5   3 2206.36 35.9651  -2
  -4  -1   3 2206.36 35.9651   1
   3  -4   3 303.752 6.88799  -2
  -3  -1   3 303.752 6.88799   1
   2  -3   3 2357.34 36.0152  -2
  -2  -1   3 2357.34 36.0152   1
   1  -2   3 2097.02 37.6381  -2
  -1  -1   3 2097.02 37.6381   1
   0  -1   3 25.1929 2.27255  -2
   0  -1   3 25.1929 2.27255   1
  -1   0   3 768.177 19.4610  -2
   1  -1   3 768.177 19.4610   1
  -2   1   3 46.2618 4.37840  -2
   2  -1   3 46.2618 4.37840   1
  -3   2   3 219.811 10.5449  -2
   3  -1   3 219.811 10.5449   1
  -4   3   3 1450.85 30.8192  -2
   4  -1   3 1450.85 30.8192   1
  -5   4   3 753.048 20.3863  -2
   5  -1   3 753.048 20.3863   1
  -6   5   3 85.7922 8.19932  -2
   6  -1   3 85.7922 8.19932   1
   7  -1   3 26.7180 3.88621   1
   8  -1   3 47.8434 8.03410   1
   9  -1   3 96.4344 15.6349   1
  10  -1   3 108.376 23.2458   1
  11  -1   3 17.8435 11.7263   1
  12  -1   3 271.852 25.6474   1
  13  -1   3 465.158 48.3889   1
 -13   0   3 385.603 41.2533   1
 -12   0   3 130.201 35.8464   1
 -11   0   3 72.3474 9.84802   1
   9  -9   3 198.567 21.8574  -2
  -9   0   3 198.567 21.8574   1
   8  -8   3 52.5857 8.18022  -2
  -8   0   3 52.5857 8.18022   1
   7  -7   3 435.603 18.8059  -2
  -7   0   3 435.603 18.8059   1
   6  -6   3 3640.42 65.1734  -2
  -6   0   3 3640.42 65.1734   1
   5  -5   3 5540.70 115.689  -2
  -5   0   3 5540.70 115.689   1
   4  -4   3 4168.19 71.1648  -2
  -4   0   3 4168.19 71.1648   1
   3  -3   3 891.119 15.4880  -2
  -3   0   3 891.119 15.4880   1
   2  -2   3 5311.85 106.882  -2
  -2   0   3 5311.85 106.882   1
   1  -1   3 652.785 13.5837  -2
  -1   0   3 652.785 13.5837   1
   0   0   3 81.6647 3.24609  -2
   0   0   3 81.6647 3.24609   1
  -1   1   3 1836.09 45.3213  -2
   1   0   3 1836.09 45.3213   1
   2   0   3 1072.99 41.3335   1
  -3   3   3 211.314 10.3653  -2
   3   0   3 211.314 10.3653   1
  -4   4   3 351.311 15.4582  -2
   4   0   3 351.311 15.4582   1
  -5   5   3 447.080 30.3523  -2
   5   0   3 447.080 30.3523   1
   6   0   3 190.124 8.65679   1
   7   0   3 68.6241 7.08695   1
   8   0   3 52.2178 11.5695   1
   9   0   3 66.7940 15.6771   1
  10   0   3 261.072 24.4410   1
  11   0   3 -3.1433 5.79821   1
  12   0   3 60.2898 15.6518   1
 -14   1   3 182.591 31.0250   1
 -13   1   3 176.979 29.8550   1
  11 -10   3 -24.014 19.8673  -2
 -11   1   3 -24.014 19.8673   1
  10  -9   3 20.3972 15.6354  -2
 -10   1   3 20.3972 15.6354   1
   9  -8   3 664.932 21.9280  -2
  -9   1   3 664.932 21.9280   1
   8  -7   3 306.963 13.5364  -2
  -8   1   3 306.963 13.5364   1
   7  -6   3 161.499 8.15239  -2
  -7   1   3 161.499 8.15239   1
   6  -5   3 3804.68 83.5346  -2
  -6   1   3 3804.68 83.5346   1
   5  -4   3 5379.49 90.5618  -2
  -5   1   3 5379.49 90.5618   1
   4  -3   3 3084.24 59.5334  -2
  -4   1   3 3084.24 59.5334   1
   3  -2   3 1315.93 43.6409  -2
  -3   1   3 1315.93 43.6409   1
   2  -1   3 34.5061 2.23987  -2
  -2   1   3 34.5061 2.23987   1
   1   0   3 2059.64 43.9118  -2
  -1   1   3 2059.64 43.9118   1
   0   1   3 23.5327 4.20957  -2
   0   1   3 23.5327 4.20957   1
  -1   2   3 131.824 10.9020  -2
   1   1   3 131.824 10.9020   1
  -2   3   3 1309.08 44.5479  -2
   2   1   3 1309.08 44.5479   1
  -3   4   3 1515.88 52.1461  -2
   3   1   3 1515.88 52.1461   1
   4   1   3 740.062 16.9041   1
   5   1   3 0.74735 1.35556   1
   6   1   3 218.417 10.3451   1
   7   1   3 268.002 11.5231   1
   8   1   3 18.3327 4.84699   1
   9   1   3 138.007 14.2107   1
  10   1   3 28.6189 5.97425   1
  11   1   3 -1.1925 9.42586   1
  12   1   3 40.7208 13.4538   1
 -14   2   3 34.4555 11.7300   1
  13 -11   3 154.440 32.4747  -2
 -13   2   3 154.440 32.4747   1
  11  -9   3 103.522 18.5922  -2
 -11   2   3 103.522 18.5922   1
  10  -8   3 1275.78 33.8855  -2
 -10   2   3 1275.78 33.8855   1
   9  -7   3 1349.18 33.8366  -2
  -9   2   3 1349.18 33.8366   1
   8  -6   3 452.705 14.4668  -2
  -8   2   3 452.705 14.4668   1
   7  -5   3 238.125 9.13160  -2
  -7   2   3 238.125 9.13160   1
   6  -4   3 4333.72 92.6617  -2
  -6   2   3 4333.72 92.6617   1
   5  -3   3 4124.21 87.2485  -2
  -5   2   3 4124.21 87.2485   1
   4  -2   3 3645.05 147.764  -2
  -4   2   3 3645.05 147.764   1
   3  -1   3 222.169 8.54573  -2
  -3   2   3 222.169 8.54573   1
   2   0   3 1066.37 28.5500  -2
  -2   2   3 1066.37 28.5500   1
   1   1   3 105.372 16.2974  -2
  -1   2   3 105.372 16.2974   1
   0   2   3 9.19594 1.19595   1
  -1   3   3 2056.37 65.2242  -2
   1   2   3 2056.37 65.2242   1
   2   2   3 927.329 16.0057   1
   3   2   3 4100.22 57.1840   1
   4   2   3 1672.02 27.4724   1
   5   2   3 -1.0996 1.22105   1
   6   2   3 303.619 10.1711   1
   7   2   3 419.287 22.2465   1
   8   2   3 4.97917 3.96011   1
   9   2   3 2.73316 4.30453   1
  10   2   3 -2.7129 4.41658   1
  11   2   3 14.1503 5.69148   1
  14 -11   3 14.6489 27.4238  -2
 -14   3   3 14.6489 27.4238   1
  13 -10   3 64.8460 26.0173  -2
 -13   3   3 64.8460 26.0173   1
  12  -9   3 5.60888 19.8983  -2
 -12   3   3 5.60888 19.8983   1
  11  -8   3 -0.3501 12.4357  -2
 -11   3   3 -0.3501 12.4357   1
  10  -7   3 902.779 23.7806  -2
 -10   3   3 902.779 23.7806   1
   9  -6   3 1493.30 32.4170  -2
  -9   3   3 1493.30 32.4170   1
   8  -5   3 769.206 19.3369  -2
  -8   3   3 769.206 19.3369   1
   7  -4   3 409.223 12.1435  -2
  -7   3   3 409.223 12.1435   1
   6  -3   3 2537.52 57.5403  -2
  -6   3   3 2537.52 57.5403   1
   5  -2   3 6381.49 129.628  -2
  -5   3   3 6381.49 129.628   1
   4  -1   3 1578.58 35.5099  -2
  -4   3   3 1578.58 35.5099   1
   3   0   3 231.592 9.85258  -2
  -3   3   3 231.592 9.85258   1
  -2   3   3 453.733 9.28775   1
  -1   3   3 1566.34 27.7981   1
   0   3   3 119.561 3.99269   1
   1   3   3 57.0311 3.66102   1
   2   3   3 3766.82 52.6450   1
   3   3   3 3824.69 54.4110   1
   4   3   3 1597.97 27.1577   1
   5   3   3 37.4890 4.36560   1
   6   3   3 16.9801 2.95061   1
   7   3   3 173.541 15.9510   1
   8   3   3 29.9570 6.25760   1
   9   3   3 114.705 15.7222   1
  10   3   3 9.93953 6.11661   1
  11   3   3 12.6176 6.22431   1
  14 -10   3 35.1627 23.3240  -2
 -14   4   3 35.1627 23.3240   1
  13  -9   3 173.953 32.1430  -2
 -13   4   3 173.953 32.1430   1
  12  -8   3 202.857 19.3220  -2
 -12   4   3 202.857 19.3220   1
  11  -7   3 119.754 12.1207  -2
 -11   4   3 119.754 12.1207   1
  10  -6   3 982.071 24.3674  -2
 -10   4   3 982.071 24.3674   1
   9  -5   3 1707.08 39.2268  -2
  -9   4   3 1707.08 39.2268   1
   8  -4   3 595.122 29.2526  -2
  -8   4   3 595.122 29.2526   1
   7  -3   3 580.850 19.9490  -2
  -7   4   3 580.850 19.9490   1
   6  -2   3 2155.04 59.4898  -2
  -6   4   3 2155.04 59.4898   1
   5  -1   3 683.468 22.0855  -2
  -5   4   3 683.468 22.0855   1
   4   0   3 317.148 13.3225  -2
  -4   4   3 317.148 13.3225   1
  -3   4   3 180.734 6.00226   1
  -2   4   3 589.343 11.2702   1
  -1   4   3 874.120 14.3543   1
   0   4   3 438.341 8.93962   1
   1   4   3 794.964 13.2037   1
   2   4   3 1138.59 19.9890   1
   3   4   3 2413.67 37.2670   1
   4   4   3 1369.84 24.7921   1
   5   4   3 11.5413 3.14111   1
   6   4   3 1.00420 3.23779   1
   7   4   3 0.67623 5.04323   1
   8   4   3 -4.1691 3.58486   1
   9   4   3 123.373 19.9161   1
  10   4   3 248.856 22.0966   1
  14  -9   3 57.5496 23.2572  -2
 -14   5   3 57.5496 23.2572   1
  12  -7   3 10.9975 10.8661  -2
 -12   5   3 10.9975 10.8661   1
  11  -6   3 10.0726 6.34461  -2
 -11   5   3 10.0726 6.34461   1
  10  -5   3 815.226 33.7547  -2
 -10   5   3 815.226 33.7547   1
   9  -4   3 647.753 28.3933  -2
  -9   5   3 647.753 28.3933   1
   8  -3   3 74.2371 20.2070  -2
  -8   5   3 74.2371 20.2070   1
   7  -2   3 51.7157 9.78926  -2
  -7   5   3 51.7157 9.78926   1
   6  -1   3 68.6231 8.26068  -2
  -6   5   3 68.6231 8.26068   1
   5   0   3 321.935 16.8273  -2
  -5   5   3 321.935 16.8273   1
  -4   5   3 28.1954 3.96747   1
  -3   5   3 372.937 10.2130   1
  -2   5   3 1910.15 30.7175   1
  -1   5   3 2783.46 39.1439   1
   0   5   3 564.390 11.2803   1
   1   5   3 74.7175 8.67717   1
   2   5   3 1582.04 26.5403   1
   3   5   3 1378.63 24.6948   1
   4   5   3 287.129 11.8253   1
   5   5   3 66.6759 8.68442   1
   6   5   3 5.66584 4.17820   1
   7   5   3 24.3759 6.10611   1
   8   5   3 3.66419 6.18029   1
   9   5   3 27.7365 7.48606   1
  14  -8   3 26.3252 17.9079  -2
 -14   6   3 26.3252 17.9079   1
  13  -7   3 254.399 29.2462  -2
 -13   6   3 254.399 29.2462   1
  12  -6   3 20.3151 12.0248  -2
 -12   6   3 20.3151 12.0248   1
  11  -5   3 136.188 16.3802  -2
 -11   6   3 136.188 16.3802   1
  10  -4   3 335.746 21.5625  -2
 -10   6   3 335.746 21.5625   1
   9  -3   3 93.2941 13.5958  -2
  -9   6   3 93.2941 13.5958   1
   8  -2   3 6.05045 19.2888  -2
  -8   6   3 6.05045 19.2888   1
   7  -1   3 47.2816 9.11463  -2
  -7   6   3 47.2816 9.11463   1
  -6   6   3 42.0480 4.26722   1
  -5   6   3 247.272 9.86454   1
  -4   6   3 58.3052 5.49460   1
  -3   6   3 185.637 6.67823   1
  -2   6   3 461.434 9.99203   1
  -1   6   3 1259.26 20.6196   1
   0   6   3 706.305 13.8933   1
   1   6   3 72.1057 4.33012   1
   2   6   3 756.295 16.6104   1
   3   6   3 916.638 21.4770   1
   4   6   3 155.446 9.62440   1
   5   6   3 285.108 18.5870   1
   6   6   3 235.353 17.6807   1
   7   6   3 363.067 27.1251   1
   8   6   3 25.7566 6.63181   1
   9   6   3 9.85569 6.27361   1
  14  -7   3 -11.214 19.1492  -2
 -14   7   3 -11.214 19.1492   1
  13  -6   3 -9.6061 17.5566  -2
 -13   7   3 -9.6061 17.5566   1
  12  -5   3 -2.4896 21.7899  -2
 -12   7   3 -2.4896 21.7899   1
  11  -4   3 64.6719 15.3941  -2
 -11   7   3 64.6719 15.3941   1
  10  -3   3 3.61579 21.3692  -2
 -10   7   3 3.61579 21.3692   1
   9  -2   3 32.6222 12.8892  -2
  -9   7   3 32.6222 12.8892   1
  -8   7   3 457.666 16.5367   1
  -7   7   3 346.895 11.3087   1
  -6   7   3 -0.2451 1.27926   1
  -5   7   3 27.4288 4.45658   1
  -4   7   3 40.7854 5.65983   1
  -3   7   3 45.3210 4.36514   1
  -2   7   3 932.750 16.8978   1
  -1   7   3 393.113 9.78945   1
   0   7   3 68.6669 4.69922   1
   1   7   3 105.486 6.35076   1
   2   7   3 160.580 9.41467   1
   3   7   3 121.568 8.35173   1
   4   7   3 0.64726 2.39903   1
   5   7   3 99.7441 13.5526   1
   6   7   3 294.989 30.9620   1
   7   7   3 293.717 21.5093   1
   8   7   3 100.356 16.4568   1
  13  -5   3 14.6199 16.2036  -2
 -13   8   3 14.6199 16.2036   1
  12  -4   3 265.868 22.1218  -2
 -12   8   3 265.868 22.1218   1
  11  -3   3 170.170 19.6305  -2
 -11   8   3 170.170 19.6305   1
  10  -2   3 26.4215 12.9675  -2
 -10   8   3 26.4215 12.9675   1
  -9   8   3 166.834 9.39091   1
  -8   8   3 1025.43 23.7810   1
  -7   8   3 482.223 14.2292   1
  -6   8   3 157.303 7.69115   1
  -5   8   3 50.5444 6.67168   1
  -4   8   3 99.1576 7.15965   1
  -3   8   3 85.3892 5.12307   1
  -2   8   3 216.631 7.36418   1
  -1   8   3 153.529 7.04388   1
   0   8   3 9.93736 2.10584   1
   1   8   3 21.4522 3.79018   1
   2   8   3 2.57058 2.12177   1
   3   8   3 -2.2369 2.33379   1
   4   8   3 -0.5294 2.82996   1
   5   8   3 80.3448 13.5066   1
   6   8   3 155.055 16.8622   1
   7   8   3 150.726 17.6680   1
  14  -5   3 63.0790 27.7855  -2
 -14   9   3 63.0790 27.7855   1
  13  -4   3 186.816 22.5029  -2
 -13   9   3 186.816 22.5029   1
  12  -3   3 434.921 35.7433  -2
 -12   9   3 434.921 35.7433   1
 -11   9   3 542.744 18.1226   1
 -10   9   3 113.307 8.88039   1
  -9   9   3 27.6920 5.10300   1
  -8   9   3 635.206 18.1410   1
  -7   9   3 967.660 22.7535   1
  -6   9   3 90.7565 7.15419   1
  -5   9   3 5.74440 2.95107   1
  -4   9   3 -1.0194 1.40724   1
  -3   9   3 10.8151 2.16033   1
  -2   9   3 359.018 11.2611   1
  -1   9   3 0.34056 1.56180   1
   0   9   3 146.420 7.82806   1
   1   9   3 91.5985 7.24623   1
   2   9   3 -2.1793 2.71014   1
   3   9   3 54.8508 10.5575   1
   4   9   3 53.1654 9.00065   1
   5   9   3 7.85474 5.01537   1
   6   9   3 95.0933 15.8436   1
  14  -4   3 97.4313 18.4736  -2
 -14  10   3 97.4313 18.4736   1
 -13  10   3 136.036 11.4194   1
 -12  10   3 441.855 17.3152   1
 -11  10   3 315.932 14.1127   1
 -10  10   3 16.0531 3.07782   1
  -9  10   3 115.220 8.66084   1
  -8  10   3 718.834 22.7024   1
  -7  10   3 219.380 10.2496   1
  -6  10   3 148.241 8.77249   1
  -5  10   3 228.278 13.6384   1
  -4  10   3 218.594 9.14881   1
  -3  10   3 223.577 9.22246   1
  -2  10   3 173.095 8.53306   1
  -1  10   3 192.222 9.55389   1
   0  10   3 518.321 15.1202   1
   1  10   3 170.978 10.4530   1
   2  10   3 50.4522 14.6895   1
   3  10   3 -3.9248 3.24167   1
   4  10   3 3.67522 4.52557   1
 -13  11   3 88.5087 11.8474   1
 -12  11   3 680.294 21.6656   1
 -11  11   3 571.474 19.1308   1
 -10  11   3 345.831 14.4623   1
  -9  11   3 0.05978 2.15960   1
  -8  11   3 64.8802 7.49727   1
  -7  11   3 103.993 8.76099   1
  -6  11   3 107.240 8.23918   1
  -5  11   3 245.659 11.3230   1
  -4  11   3 479.888 14.2812   1
  -3  11   3 230.311 10.3902   1
  -2  11   3 55.4692 9.40049   1
  -1  11   3 139.351 12.2763   1
   0  11   3 547.722 23.2180   1
   1  11   3 438.628 17.1557   1
   2  11   3 68.0062 18.0572   1
   3  11   3 10.7653 8.19876   1
 -12  12   3 342.820 15.6488   1
 -11  12   3 296.083 14.2850   1
 -10  12   3 106.845 9.49039   1
  -9  12   3 16.3657 3.52533   1
  -8  12   3 8.98122 2.78001   1
  -7  12   3 4.39288 2.42225   1
  -6  12   3 34.2223 5.33189   1
  -5  12   3 354.706 13.2130   1
  -4  12   3 780.498 19.3315   1
  -3  12   3 713.391 20.2431   1
  -2  12   3 59.1676 7.11613   1
  -1  12   3 27.3602 4.43928   1
   0  12   3 165.828 14.1428   1
   1  12   3 168.228 15.0643   1
  12   1   3 74.6599 25.9609  -2
 -11  13   3 74.6599 25.9609   1
 -10  13   3 3.64268 3.36128   1
  -9  13   3 11.5761 3.81536   1
  -8  13   3 51.3651 6.92181   1
  -7  13   3 20.6312 2.90848   1
  -6  13   3 3.68333 1.95856   1
  -5  13   3 199.762 8.40516   1
  -4  13   3 334.988 18.8849   1
  -3  13   3 402.863 20.3051   1
  -2  13   3 123.743 13.3673   1
  -1  13   3 11.9901 5.12186   1
  -9  14   3 -0.1506 2.88515   1
  -8  14   3 95.9719 7.96670   1
  -7  14   3 104.465 9.36509   1
  -6  14   3 -1.0798 2.31561   1
  -5  14   3 19.2448 5.25308   1
  -4  14   3 279.232 18.2722   1
  -3  14   3 202.010 15.8087   1
   4 -16   4 -1.5438 7.01443   1
   5 -16   4 5.85407 5.30573   1
   6 -16   4 4.29696 4.95572   1
   7 -16   4 -4.3645 4.12199   1
   8 -16   4 1.15129 5.36079   1
   9 -16   4 93.6995 22.3520   1
   1 -15   4 22.7508 6.33154   1
   2 -15   4 44.8333 8.84383   1
   3 -15   4 4.73774 5.85632   1
   4 -15   4 4.36020 4.56058   1
   5 -15   4 6.01001 4.92104   1
   6 -15   4 6.17756 4.93353   1
   7 -15   4 10.0724 5.28183   1
   8 -15   4 5.54643 5.11340   1
   9 -15   4 96.9716 18.6683   1
  10 -15   4 125.074 12.0212   1
 -12  -3   4 124.645 34.2999  -2
  11 -15   4 124.645 34.2999   1
  -1 -14   4 26.3497 6.31603   1
   0 -14   4 -2.2411 3.93027   1
   1 -14   4 87.7317 13.0750   1
   2 -14   4 -1.6834 3.88636   1
   3 -14   4 9.02410 4.78894   1
   4 -14   4 8.91846 4.72481   1
   5 -14   4 42.4848 8.32026   1
   6 -14   4 289.390 19.1118   1
   7 -14   4 157.399 15.2800   1
   8 -14   4 -3.0545 3.42186   1
   9 -14   4 108.347 9.53881   1
  10 -14   4 60.5371 14.4816   1
  11 -14   4 14.8842 3.88958   1
  12 -14   4 10.8958 3.84727   1
  -3 -13   4 -3.7300 5.03958   1
  -2 -13   4 -0.2832 4.16154   1
  -1 -13   4 2.61880 4.53605   1
   0 -13   4 10.4544 4.81025   1
   1 -13   4 112.989 13.1563   1
   2 -13   4 226.439 17.1558   1
   3 -13   4 132.040 13.7098   1
   4 -13   4 -0.1849 3.07106   1
   5 -13   4 332.731 19.5030   1
   6 -13   4 296.215 18.7674   1
   7 -13   4 170.859 15.0104   1
   8 -13   4 0.79148 2.08314   1
 -10  -3   4 90.6510 25.6361  -2
   9 -13   4 90.6510 25.6361   1
  10 -13   4 81.4419 9.87677   1
  11 -13   4 2.70901 3.18273   1
  12 -13   4 9.94064 5.44966   1
  13 -13   4 -0.0001 4.76926   1
  -4 -12   4 8.72019 3.61935   1
  -3 -12   4 -0.0392 2.70826   1
  -2 -12   4 40.6991 7.66460   1
  -1 -12   4 100.084 12.4600   1
   0 -12   4 19.6964 5.08196   1
   1 -12   4 4.44440 3.65041   1
   2 -12   4 210.009 15.5930   1
   3 -12   4 220.709 15.6804   1
   4 -12   4 14.7622 4.46502   1
   5 -12   4 71.0143 10.7166   1
   6 -12   4 680.749 26.5837   1
   7 -12   4 193.499 10.0977   1
   8 -12   4 12.1050 3.08627   1
   9 -12   4 3.53033 3.00252   1
  10 -12   4 -0.7770 3.66215   1
  11 -12   4 -3.6664 4.92352   1
  12 -12   4 4.91897 8.26239   1
 -13   1   4 -21.699 26.8758  -2
  13 -12   4 -21.699 26.8758   1
  -5 -11   4 8.61683 4.00192   1
  -4 -11   4 1.53251 3.06438   1
  -3 -11   4 2.66401 2.54758   1
  -2 -11   4 27.3891 4.51694   1
  -1 -11   4 181.135 14.5019   1
   0 -11   4 4.77959 3.51986   1
   1 -11   4 225.955 15.2440   1
   2 -11   4 967.114 32.7789   1
   3 -11   4 792.493 29.0169   1
   4 -11   4 78.8599 9.70069   1
   5 -11   4 39.9179 6.18779   1
   6 -11   4 340.107 11.9471   1
   7 -11   4 66.4556 6.98570   1
   8 -11   4 14.4972 3.68966   1
   9 -11   4 -4.6369 2.65163   1
  10 -11   4 105.449 9.53280   1
 -11   0   4 327.312 33.9271  -2
  11 -11   4 327.312 33.9271   1
 -12   1   4 179.532 31.1434  -2
  12 -11   4 179.532 31.1434   1
 -13   2   4 57.3321 20.2731  -2
  13 -11   4 57.3321 20.2731   1
 -14   3   4 421.373 45.3028  -2
  14 -11   4 421.373 45.3028   1
  -6 -10   4 1.22754 4.13030   1
  -5 -10   4 23.2879 6.12688   1
  -4 -10   4 134.940 10.7796   1
  -3 -10   4 3.79590 2.65511   1
  -2 -10   4 213.832 10.5732   1
  -1 -10   4 807.069 22.8824   1
   0 -10   4 275.380 15.5893   1
   1 -10   4 13.7473 3.83269   1
   2 -10   4 281.385 15.0879   1
   3 -10   4 501.603 17.8936   1
   4 -10   4 215.238 11.5100   1
   5 -10   4 0.56011 2.55275   1
   6 -10   4 33.7698 4.68910   1
   7 -10   4 17.4903 3.96077   1
   8 -10   4 6.90859 2.61418   1
   9 -10   4 117.650 10.1687   1
 -10   0   4 474.316 25.9702  -2
  10 -10   4 474.316 25.9702   1
 -11   1   4 564.278 30.4389  -2
  11 -10   4 564.278 30.4389   1
 -12   2   4 126.413 19.4218  -2
  12 -10   4 126.413 19.4218   1
 -13   3   4 -9.5693 23.4878  -2
  13 -10   4 -9.5693 23.4878   1
  -7  -9   4 2.62611 4.50864   1
  -6  -9   4 74.6274 13.0531   1
  -5  -9   4 275.615 17.7830   1
  -4  -9   4 256.496 13.1854   1
  -3  -9   4 1.79963 2.43107   1
  -2  -9   4 397.830 14.1346   1
  -1  -9   4 427.363 13.6478   1
   0  -9   4 261.093 12.2891   1
   1  -9   4 34.3612 6.01694   1
   2  -9   4 344.261 14.2968   1
   3  -9   4 118.845 8.44266   1
   4  -9   4 2.52623 2.46206   1
   5  -9   4 14.9659 3.03229   1
   6  -9   4 212.248 8.79679   1
  -7  -2   4 514.500 29.5918  -2
   7  -9   4 514.500 29.5918   1
  -8  -1   4 373.724 15.4405  -2
   8  -9   4 373.724 15.4405   1
  -9   0   4 66.6339 20.9492  -2
   9  -9   4 66.6339 20.9492   1
 -10   1   4 506.788 27.9515  -2
  10  -9   4 506.788 27.9515   1
 -11   2   4 555.739 42.7734  -2
  11  -9   4 555.739 42.7734   1
 -12   3   4 5.13018 21.5386  -2
  12  -9   4 5.13018 21.5386   1
 -13   4   4 10.5320 22.2420  -2
  13  -9   4 10.5320 22.2420   1
 -14   5   4 199.373 31.3086  -2
  14  -9   4 199.373 31.3086   1
  -8  -8   4 22.4792 6.10614   1
  -7  -8   4 -4.8109 3.68100   1
  -6  -8   4 203.106 16.3638   1
  -5  -8   4 630.070 21.0996   1
  -4  -8   4 349.152 14.5546   1
  -3  -8   4 83.9929 7.84548   1
  -2  -8   4 245.216 10.6723   1
  -1  -8   4 287.956 8.66632   1
   0  -8   4 39.3766 5.20479   1
   1  -8   4 8.16463 2.40731   1
   2  -8   4 297.170 11.6573   1
   3  -8   4 49.8849 5.82050   1
  -4  -4   4 546.308 32.4018  -2
   4  -8   4 546.308 32.4018   1
  -5  -3   4 580.952 34.1154  -2
   5  -8   4 580.952 34.1154   1
  -6  -2   4 712.980 22.7249  -2
   6  -8   4 712.980 22.7249   1
  -7  -1   4 2144.31 45.4113  -2
   7  -8   4 2144.31 45.4113   1
  -8   0   4 1254.20 27.4877  -2
   8  -8   4 1254.20 27.4877   1
  -9   1   4 742.839 29.0418  -2
   9  -8   4 742.839 29.0418   1
 -10   2   4 1144.27 60.9183  -2
  10  -8   4 1144.27 60.9183   1
 -11   3   4 923.583 55.8789  -2
  11  -8   4 923.583 55.8789   1
 -13   5   4 51.5413 22.2289  -2
  13  -8   4 51.5413 22.2289   1
  -9  -7   4 72.7666 10.1893   1
  -8  -7   4 77.2778 13.5695   1
  -7  -7   4 1.25726 3.89365   1
  -6  -7   4 201.127 15.4653   1
  -5  -7   4 554.457 18.7502   1
  -4  -7   4 381.497 14.5540   1
  -3  -7   4 59.0641 5.43252   1
  -2  -7   4 233.919 8.22728   1
  -1  -7   4 80.4457 4.93876   1
   0  -7   4 233.306 6.70327   1
   1  -7   4 112.225 7.14644   1
   2  -7   4 1.57301 2.05059   1
  -3  -4   4 1086.58 46.8438  -2
   3  -7   4 1086.58 46.8438   1
  -4  -3   4 433.337 13.9804  -2
   4  -7   4 433.337 13.9804   1
  -5  -2   4 1310.75 28.5378  -2
   5  -7   4 1310.75 28.5378   1
  -6  -1   4 2025.15 38.5856  -2
   6  -7   4 2025.15 38.5856   1
  -7   0   4 2281.38 49.1655  -2
   7  -7   4 2281.38 49.1655   1
  -8   1   4 608.912 36.7799  -2
   8  -7   4 608.912 36.7799   1
  -9   2   4 -10.722 10.8596  -2
   9  -7   4 -10.722 10.8596   1
 -10   3   4 453.192 36.6982  -2
  10  -7   4 453.192 36.6982   1
 -11   4   4 314.689 32.4580  -2
  11  -7   4 314.689 32.4580   1
 -12   5   4 7.59301 19.0481  -2
  12  -7   4 7.59301 19.0481   1
 -10  -6   4 1.40196 5.70511   1
  -9  -6   4 123.892 15.5799   1
  -8  -6   4 164.248 15.6012   1
  -7  -6   4 42.1790 7.47859   1
  -6  -6   4 1.24174 2.85477   1
  -5  -6   4 796.298 19.7001   1
  -4  -6   4 79.0731 5.62436   1
  -3  -6   4 209.339 7.78022   1
  -2  -6   4 1.45487 1.20353   1
  -1  -6   4 2.22786 1.07269   1
   0  -6   4 3.21155 1.07058   1
  -1  -5   4 206.060 19.3795  -2
   1  -6   4 206.060 19.3795   1
  -2  -4   4 538.169 20.6822  -2
   2  -6   4 538.169 20.6822   1
  -3  -3   4 1198.43 34.4764  -2
   3  -6   4 1198.43 34.4764   1
  -4  -2   4 2104.91 51.8793  -2
   4  -6   4 2104.91 51.8793   1
  -5  -1   4 101.029 6.22410  -2
   5  -6   4 101.029 6.22410   1
  -6   0   4 1251.17 25.9297  -2
   6  -6   4 1251.17 25.9297   1
  -7   1   4 1406.12 40.3934  -2
   7  -6   4 1406.12 40.3934   1
  -8   2   4 502.365 33.2664  -2
   8  -6   4 502.365 33.2664   1
 -10   4   4 24.2451 17.7738  -2
  10  -6   4 24.2451 17.7738   1
 -12   6   4 49.8289 23.6908  -2
  12  -6   4 49.8289 23.6908   1
 -14   8   4 209.629 38.5431  -2
  14  -6   4 209.629 38.5431   1
 -11  -5   4 44.6112 9.26717   1
 -10  -5   4 5.19639 5.83727   1
  -9  -5   4 262.433 18.6499   1
  -8  -5   4 300.360 19.0938   1
  -7  -5   4 215.811 15.3563   1
  -6  -5   4 16.3402 3.50395   1
  -5  -5   4 81.7657 5.88711   1
  -4  -5   4 4.97358 1.51098   1
   3  -8   4 120.123 17.2255  -2
  -3  -5   4 120.123 17.2255   1
  -2  -5   4 4.29715 1.23062   1
   1  -6   4 230.992 12.9340  -2
  -1  -5   4 230.992 12.9340   1
   0  -5   4 2947.20 68.4406  -2
   0  -5   4 2947.20 68.4406   1
  -1  -4   4 706.912 16.6563  -2
   1  -5   4 706.912 16.6563   1
  -2  -3   4 414.212 14.6038  -2
   2  -5   4 414.212 14.6038   1
  -3  -2   4 4242.47 62.0053  -2
   3  -5   4 4242.47 62.0053   1
  -4  -1   4 1397.56 31.9363  -2
   4  -5   4 1397.56 31.9363   1
  -5   0   4 255.812 9.19688  -2
   5  -5   4 255.812 9.19688   1
  -6   1   4 263.560 13.6754  -2
   6  -5   4 263.560 13.6754   1
  -7   2   4 577.295 22.5617  -2
   7  -5   4 577.295 22.5617   1
  -8   3   4 63.2670 11.6026  -2
   8  -5   4 63.2670 11.6026   1
  -9   4   4 -16.997 14.4914  -2
   9  -5   4 -16.997 14.4914   1
 -10   5   4 113.157 25.5103  -2
  10  -5   4 113.157 25.5103   1
 -11   6   4 309.111 36.9609  -2
  11  -5   4 309.111 36.9609   1
 -12   7   4 42.7920 27.2200  -2
  12  -5   4 42.7920 27.2200   1
 -13   8   4 81.7074 32.3082  -2
  13  -5   4 81.7074 32.3082   1
 -14   9   4 281.064 44.4729  -2
  14  -5   4 281.064 44.4729   1
 -11  -4   4 146.202 17.0378   1
 -10  -4   4 -0.6068 3.80740   1
  -9  -4   4 66.6603 14.7828   1
  -8  -4   4 67.3866 14.4533   1
  -7  -4   4 6.68188 2.68517   1
  -6  -4   4 -0.2831 2.10717   1
  -5  -4   4 0.63377 1.37745   1
  -4  -4   4 378.648 10.2182   1
   3  -7   4 1057.22 31.6399  -2
  -3  -4   4 1057.22 31.6399   1
   2  -6   4 497.400 14.0534  -2
  -2  -4   4 497.400 14.0534   1
   1  -5   4 779.861 18.3998  -2
  -1  -4   4 779.861 18.3998   1
   0  -4   4 1820.83 39.5352  -2
   0  -4   4 1820.83 39.5352   1
  -1  -3   4 1654.39 40.9565  -2
   1  -4   4 1654.39 40.9565   1
  -2  -2   4 2939.24 49.5642  -2
   2  -4   4 2939.24 49.5642   1
  -3  -1   4 1193.06 23.2015  -2
   3  -4   4 1193.06 23.2015   1
  -4   0   4 1958.13 41.3949  -2
   4  -4   4 1958.13 41.3949   1
  -5   1   4 120.599 8.94716  -2
   5  -4   4 120.599 8.94716   1
  -6   2   4 278.355 14.8566  -2
   6  -4   4 278.355 14.8566   1
  -7   3   4 -0.2124 9.82282  -2
   7  -4   4 -0.2124 9.82282   1
  -8   4   4 321.964 18.5244  -2
   8  -4   4 321.964 18.5244   1
  -9   5   4 3.25213 18.3277  -2
   9  -4   4 3.25213 18.3277   1
 -10   6   4 382.206 38.0446  -2
  10  -4   4 382.206 38.0446   1
 -11   7   4 691.192 54.0882  -2
  11  -4   4 691.192 54.0882   1
 -13   9   4 177.955 39.2952  -2
  13  -4   4 177.955 39.2952   1
  14  -4   4 24.3316 12.5245   1
 -12  -3   4 101.576 15.6381   1
 -11  -3   4 53.7045 10.6688   1
 -10  -3   4 13.6927 4.91373   1
  -9  -3   4 -3.2025 4.65252   1
  -8  -3   4 0.18481 2.17177   1
  -7  -3   4 7.71653 2.64173   1
  -6  -3   4 29.0230 3.67580   1
  -5  -3   4 660.548 16.3866   1
   4  -7   4 475.527 14.2932  -2
  -4  -3   4 475.527 14.2932   1
   3  -6   4 1252.37 21.9258  -2
  -3  -3   4 1252.37 21.9258   1
   2  -5   4 394.676 13.8062  -2
  -2  -3   4 394.676 13.8062   1
   1  -4   4 1859.68 27.0983  -2
  -1  -3   4 1859.68 27.0983   1
   0  -3   4 7986.09 144.408  -2
   0  -3   4 7986.09 144.408   1
  -1  -2   4 4486.65 92.3420  -2
   1  -3   4 4486.65 92.3420   1
  -2  -1   4 3760.37 57.2600  -2
   2  -3   4 3760.37 57.2600   1
  -3   0   4 2215.10 48.9120  -2
   3  -3   4 2215.10 48.9120   1
  -4   1   4 1007.09 21.4061  -2
   4  -3   4 1007.09 21.4061   1
  -5   2   4 210.797 12.5759  -2
   5  -3   4 210.797 12.5759   1
  -6   3   4 245.309 14.4558  -2
   6  -3   4 245.309 14.4558   1
  -8   5   4 357.387 19.3011  -2
   8  -3   4 357.387 19.3011   1
  -9   6   4 368.828 35.5208  -2
   9  -3   4 368.828 35.5208   1
 -10   7   4 247.857 34.9794  -2
  10  -3   4 247.857 34.9794   1
 -11   8   4 958.028 64.7410  -2
  11  -3   4 958.028 64.7410   1
  12  -3   4 452.053 48.2203   1
  13  -3   4 -6.3466 8.59887   1
 -12  -2   4 17.1847 8.89667   1
 -11  -2   4 1.90534 4.10023   1
 -10  -2   4 5.22139 4.12339   1
  -9  -2   4 23.6271 3.80692   1
  -8  -2   4 267.369 12.0182   1
  -7  -2   4 322.589 10.2262   1
   6  -8   4 589.330 14.8548  -2
  -6  -2   4 589.330 14.8548   1
   5  -7   4 1608.85 27.0926  -2
  -5  -2   4 1608.85 27.0926   1
   4  -6   4 2249.43 34.5972  -2
  -4  -2   4 2249.43 34.5972   1
   3  -5   4 4234.67 56.5933  -2
  -3  -2   4 4234.67 56.5933   1
   2  -4   4 3170.55 42.9326  -2
  -2  -2   4 3170.55 42.9326   1
   1  -3   4 4451.88 84.0871  -2
  -1  -2   4 4451.88 84.0871   1
   0  -2   4 6585.95 109.215  -2
   0  -2   4 6585.95 109.215   1
  -1  -1   4 513.013 9.62170  -2
   1  -2   4 513.013 9.62170   1
  -2   0   4 378.983 14.9882  -2
   2  -2   4 378.983 14.9882   1
  -3   1   4 834.104 20.7087  -2
   3  -2   4 834.104 20.7087   1
  -4   2   4 582.826 20.7999  -2
   4  -2   4 582.826 20.7999   1
  -5   3   4 2400.60 61.5841  -2
   5  -2   4 2400.60 61.5841   1
  -6   4   4 1719.14 38.0037  -2
   6  -2   4 1719.14 38.0037   1
  -7   5   4 1109.14 33.8181  -2
   7  -2   4 1109.14 33.8181   1
  -8   6   4 720.795 31.9036  -2
   8  -2   4 720.795 31.9036   1
  -9   7   4 510.541 42.5616  -2
   9  -2   4 510.541 42.5616   1
  10  -2   4 16.9392 5.63958   1
  11  -2   4 221.961 32.9025   1
  12  -2   4 106.832 21.1760   1
  13  -2   4 18.0204 9.87006   1
 -13  -1   4 6.69572 7.50673   1
 -12  -1   4 9.01392 8.21226   1
 -11  -1   4 -4.2143 5.23554   1
 -10  -1   4 -0.8302 3.45860   1
   9 -10   4 302.944 33.0216  -2
  -9  -1   4 302.944 33.0216   1
   8  -9   4 396.936 16.9924  -2
  -8  -1   4 396.936 16.9924   1
   7  -8   4 2206.18 48.4925  -2
  -7  -1   4 2206.18 48.4925   1
   6  -7   4 1786.07 29.5875  -2
  -6  -1   4 1786.07 29.5875   1
   5  -6   4 125.772 5.43507  -2
  -5  -1   4 125.772 5.43507   1
   4  -5   4 1474.38 22.4979  -2
  -4  -1   4 1474.38 22.4979   1
   3  -4   4 1126.02 22.6431  -2
  -3  -1   4 1126.02 22.6431   1
   2  -3   4 3837.85 54.5316  -2
  -2  -1   4 3837.85 54.5316   1
   1  -2   4 505.111 15.1657  -2
  -1  -1   4 505.111 15.1657   1
   0  -1   4 1682.85 37.6906  -2
   0  -1   4 1682.85 37.6906   1
  -1   0   4 779.632 20.9807  -2
   1  -1   4 779.632 20.9807   1
  -2   1   4 403.186 13.5186  -2
   2  -1   4 403.186 13.5186   1
  -3   2   4 1779.48 38.9500  -2
   3  -1   4 1779.48 38.9500   1
  -4   3   4 1660.37 35.1958  -2
   4  -1   4 1660.37 35.1958   1
  -5   4   4 768.928 25.9764  -2
   5  -1   4 768.928 25.9764   1
  -6   5   4 346.350 28.0683  -2
   6  -1   4 346.350 28.0683   1
  -7   6   4 1138.92 58.4599  -2
   7  -1   4 1138.92 58.4599   1
   8  -1   4 1274.09 48.5020   1
   9  -1   4 245.303 20.7432   1
  10  -1   4 -4.0733 5.65680   1
  11  -1   4 19.4267 9.88140   1
  12  -1   4 38.4746 12.4220   1
  13  -1   4 10.5523 8.83784   1
 -13   0   4 -2.2432 6.74895   1
 -12   0   4 113.880 28.6492   1
  11 -11   4 415.882 37.7234  -2
 -11   0   4 415.882 37.7234   1
  10 -10   4 531.691 41.1579  -2
 -10   0   4 531.691 41.1579   1
   9  -9   4 44.6873 10.1342  -2
  -9   0   4 44.6873 10.1342   1
   8  -8   4 1328.50 33.5793  -2
  -8   0   4 1328.50 33.5793   1
   7  -7   4 2518.60 58.0275  -2
  -7   0   4 2518.60 58.0275   1
   6  -6   4 1218.31 26.5628  -2
  -6   0   4 1218.31 26.5628   1
   5  -5   4 228.900 8.33046  -2
  -5   0   4 228.900 8.33046   1
   4  -4   4 1971.54 36.4789  -2
  -4   0   4 1971.54 36.4789   1
   3  -3   4 2221.84 36.1380  -2
  -3   0   4 2221.84 36.1380   1
   2  -2   4 314.979 12.4775  -2
  -2   0   4 314.979 12.4775   1
   1  -1   4 671.768 12.1225  -2
  -1   0   4 671.768 12.1225   1
   0   0   4 3651.10 62.3793  -2
   0   0   4 3651.10 62.3793   1
  -1   1   4 1250.29 33.6654  -2
   1   0   4 1250.29 33.6654   1
  -2   2   4 492.468 17.4502  -2
   2   0   4 492.468 17.4502   1
  -3   3   4 1099.82 40.4587  -2
   3   0   4 1099.82 40.4587   1
  -4   4   4 2605.95 93.8546  -2
   4   0   4 2605.95 93.8546   1
  -5   5   4 1073.93 51.3885  -2
   5   0   4 1073.93 51.3885   1
   6   0   4 75.4234 6.28313   1
   7   0   4 182.112 9.93841   1
   8   0   4 149.566 14.3083   1
   9   0   4 137.813 19.3942   1
  10   0   4 5.85614 5.61699   1
  11   0   4 3.34853 10.6968   1
  12   0   4 -0.1348 8.45471   1
  13 -12   4 79.9880 29.3690  -2
 -13   1   4 79.9880 29.3690   1
  11 -10   4 603.594 43.8386  -2
 -11   1   4 603.594 43.8386   1
  10  -9   4 404.062 18.1708  -2
 -10   1   4 404.062 18.1708   1
   9  -8   4 573.807 19.7398  -2
  -9   1   4 573.807 19.7398   1
   8  -7   4 741.314 20.0538  -2
  -8   1   4 741.314 20.0538   1
   7  -6   4 1520.39 37.8499  -2
  -7   1   4 1520.39 37.8499   1
   6  -5   4 261.308 9.31878  -2
  -6   1   4 261.308 9.31878   1
   5  -4   4 144.472 5.45737  -2
  -5   1   4 144.472 5.45737   1
   4  -3   4 945.423 23.7344  -2
  -4   1   4 945.423 23.7344   1
   3  -2   4 750.841 30.6250  -2
  -3   1   4 750.841 30.6250   1
   2  -1   4 339.607 8.88341  -2
  -2   1   4 339.607 8.88341   1
   1   0   4 1036.93 53.0734  -2
  -1   1   4 1036.93 53.0734   1
   0   1   4 2231.33 55.4280  -2
   0   1   4 2231.33 55.4280   1
  -1   2   4 2139.73 47.2239  -2
   1   1   4 2139.73 47.2239   1
  -2   3   4 1059.91 38.9149  -2
   2   1   4 1059.91 38.9149   1
   3   1   4 364.799 10.7137   1
   4   1   4 1247.50 25.0435   1
   5   1   4 237.102 11.5001   1
   6   1   4 22.1670 3.01328   1
   7   1   4 146.727 14.2966   1
   8   1   4 255.650 18.8867   1
   9   1   4 -1.8708 3.88759   1
  10   1   4 99.7352 15.5196   1
  11   1   4 32.4812 10.3480   1
  12   1   4 92.7457 29.0007   1
 -14   2   4 23.8185 8.70443   1
  13 -11   4 49.5319 25.7899  -2
 -13   2   4 49.5319 25.7899   1
  11  -9   4 551.018 40.0765  -2
 -11   2   4 551.018 40.0765   1
  10  -8   4 1315.08 34.1724  -2
 -10   2   4 1315.08 34.1724   1
   9  -7   4 12.1856 5.25949  -2
  -9   2   4 12.1856 5.25949   1
   8  -6   4 591.794 16.7261  -2
  -8   2   4 591.794 16.7261   1
   7  -5   4 630.778 22.3866  -2
  -7   2   4 630.778 22.3866   1
   6  -4   4 241.024 8.47996  -2
  -6   2   4 241.024 8.47996   1
   5  -3   4 151.769 14.4981  -2
  -5   2   4 151.769 14.4981   1
   4  -2   4 480.228 13.7416  -2
  -4   2   4 480.228 13.7416   1
   3  -1   4 1794.55 40.0779  -2
  -3   2   4 1794.55 40.0779   1
   2   0   4 617.898 26.7275  -2
  -2   2   4 617.898 26.7275   1
   1   1   4 1696.79 77.7482  -2
  -1   2   4 1696.79 77.7482   1
   0   2   4 4775.15 69.8425   1
   1   2   4 2336.31 33.5979   1
   2   2   4 627.352 12.4771   1
   3   2   4 4.31092 1.25770   1
   4   2   4 985.810 18.8654   1
   5   2   4 97.0711 6.17498   1
   6   2   4 65.9964 6.77839   1
   7   2   4 -2.0836 3.83473   1
   8   2   4 54.8100 7.98345   1
   9   2   4 15.5847 5.63410   1
  10   2   4 0.10943 5.31968   1
  11   2   4 63.9073 10.4815   1
  14 -11   4 374.410 40.1006  -2
 -14   3   4 374.410 40.1006   1
  13 -10   4 18.3253 22.0037  -2
 -13   3   4 18.3253 22.0037   1
  12  -9   4 27.9822 19.4218  -2
 -12   3   4 27.9822 19.4218   1
  11  -8   4 931.999 27.3180  -2
 -11   3   4 931.999 27.3180   1
  10  -7   4 502.506 16.3227  -2
 -10   3   4 502.506 16.3227   1
   9  -6   4 13.2145 4.45244  -2
  -9   3   4 13.2145 4.45244   1
   8  -5   4 59.1461 5.52979  -2
  -8   3   4 59.1461 5.52979   1
   7  -4   4 -4.5814 6.94208  -2
  -7   3   4 -4.5814 6.94208   1
   6  -3   4 286.081 13.8163  -2
  -6   3   4 286.081 13.8163   1
   5  -2   4 1900.82 62.5187  -2
  -5   3   4 1900.82 62.5187   1
   4  -1   4 1773.95 58.8711  -2
  -4   3   4 1773.95 58.8711   1
   3   0   4 1265.34 33.8240  -2
  -3   3   4 1265.34 33.8240   1
   2   1   4 1387.62 67.6823  -2
  -2   3   4 1387.62 67.6823   1
  -1   3   4 233.275 7.52462   1
   0   3   4 3725.58 56.1292   1
   1   3   4 1537.59 24.0896   1
   2   3   4 59.0652 4.10779   1
   3   3   4 3.00576 1.30226   1
   4   3   4 216.052 8.03249   1
   5   3   4 2.71910 1.97668   1
   6   3   4 4.06333 2.75014   1
   7   3   4 4.72022 4.45559   1
   8   3   4 31.1598 6.35510   1
   9   3   4 514.372 27.8413   1
  10   3   4 35.2478 7.59427   1
  11   3   4 16.1162 6.41522   1
  14 -10   4 290.719 34.0422  -2
 -14   4   4 290.719 34.0422   1
  12  -8   4 -16.858 18.8120  -2
 -12   4   4 -16.858 18.8120   1
  11  -7   4 334.141 13.4038  -2
 -11   4   4 334.141 13.4038   1
  10  -6   4 79.4002 7.44783  -2
 -10   4   4 79.4002 7.44783   1
   9  -5   4 1.14264 9.03525  -2
  -9   4   4 1.14264 9.03525   1
   8  -4   4 288.999 21.6621  -2
  -8   4   4 288.999 21.6621   1
   7  -3   4 1711.61 43.6852  -2
  -7   4   4 1711.61 43.6852   1
   6  -2   4 2221.60 72.3651  -2
  -6   4   4 2221.60 72.3651   1
   5  -1   4 617.527 20.6665  -2
  -5   4   4 617.527 20.6665   1
  -4   4   4 761.593 23.1864   1
  -3   4   4 1631.16 27.9717   1
  -2   4   4 442.818 13.5251   1
   0   4   4 18.4069 2.02941   1
   1   4   4 2.65670 1.11458   1
   2   4   4 54.2791 4.22159   1
   3   4   4 39.1554 4.92093   1
   4   4   4 194.665 10.5310   1
   5   4   4 124.120 8.30006   1
   6   4   4 409.772 22.2474   1
   7   4   4 5.43618 4.39466   1
   8   4   4 352.249 23.3408   1
   9   4   4 127.987 17.1897   1
  10   4   4 113.084 22.8557   1
  14  -9   4 188.150 28.9729  -2
 -14   5   4 188.150 28.9729   1
  13  -8   4 65.6682 24.5408  -2
 -13   5   4 65.6682 24.5408   1
  12  -7   4 16.0620 10.0752  -2
 -12   5   4 16.0620 10.0752   1
  11  -6   4 -3.8194 6.68296  -2
 -11   5   4 -3.8194 6.68296   1
  10  -5   4 214.471 16.0128  -2
 -10   5   4 214.471 16.0128   1
   9  -4   4 36.4559 12.0669  -2
  -9   5   4 36.4559 12.0669   1
   8  -3   4 265.524 29.6958  -2
  -8   5   4 265.524 29.6958   1
   7  -2   4 1224.02 29.2745  -2
  -7   5   4 1224.02 29.2745   1
   6  -1   4 364.000 15.9688  -2
  -6   5   4 364.000 15.9688   1
  -5   5   4 154.458 7.23680   1
  -4   5   4 280.752 9.75995   1
  -3   5   4 474.602 11.1937   1
  -2   5   4 432.574 9.71347   1
  -1   5   4 47.9615 3.18133   1
   0   5   4 1.54183 1.06969   1
   1   5   4 3.86882 1.29038   1
   2   5   4 115.334 6.09824   1
   3   5   4 14.5959 2.46411   1
   4   5   4 203.412 10.8883   1
   5   5   4 726.493 29.2649   1
   6   5   4 282.121 19.5569   1
   7   5   4 2.22966 4.07352   1
   8   5   4 28.3518 6.44641   1
   9   5   4 224.733 23.5173   1
  12  -6   4 40.2510 14.3360  -2
 -12   6   4 40.2510 14.3360   1
  11  -5   4 344.919 23.3822  -2
 -11   6   4 344.919 23.3822   1
  10  -4   4 508.488 27.8495  -2
 -10   6   4 508.488 27.8495   1
   9  -3   4 454.977 25.0051  -2
  -9   6   4 454.977 25.0051   1
   8  -2   4 620.731 23.7136  -2
  -8   6   4 620.731 23.7136   1
   7  -1   4 970.880 36.9793  -2
  -7   6   4 970.880 36.9793   1
  -6   6   4 516.266 15.7244   1
  -5   6   4 326.987 11.6521   1
  -4   6   4 12.6378 2.39883   1
  -3   6   4 263.985 8.88355   1
  -2   6   4 6.39983 1.38941   1
  -1   6   4 14.5552 1.85310   1
   0   6   4 204.899 6.70175   1
   1   6   4 510.666 13.5942   1
   2   6   4 156.528 8.16740   1
   3   6   4 10.2062 3.14665   1
   4   6   4 585.377 20.5607   1
   5   6   4 413.873 22.7156   1
   6   6   4 302.083 20.3913   1
   7   6   4 -6.1120 3.74729   1
   8   6   4 24.9186 6.81986   1
  14  -7   4 9.48706 15.5892  -2
 -14   7   4 9.48706 15.5892   1
  12  -5   4 51.6717 15.7364  -2
 -12   7   4 51.6717 15.7364   1
  11  -4   4 786.616 35.6813  -2
 -11   7   4 786.616 35.6813   1
  10  -3   4 407.391 25.0214  -2
 -10   7   4 407.391 25.0214   1
   9  -2   4 529.220 23.6488  -2
  -9   7   4 529.220 23.6488   1
  -8   7   4 6.23808 2.41711   1
  -7   7   4 460.429 13.3313   1
  -6   7   4 228.967 10.2678   1
  -5   7   4 69.6397 6.27568   1
  -4   7   4 -1.4784 1.36516   1
  -3   7   4 22.6580 2.51376   1
  -2   7   4 8.41688 1.63914   1
  -1   7   4 41.0595 4.28304   1
   0   7   4 277.276 8.55151   1
   1   7   4 509.137 13.7572   1
   2   7   4 149.163 9.26775   1
   3   7   4 391.568 14.8571   1
   4   7   4 27.4207 5.69920   1
   5   7   4 272.125 19.4954   1
   6   7   4 132.208 15.7084   1
   7   7   4 2.20898 6.43744   1
  14  -6   4 279.187 26.0895  -2
 -14   8   4 279.187 26.0895   1
  13  -5   4 70.5246 35.0471  -2
 -13   8   4 70.5246 35.0471   1
  12  -4   4 164.795 19.7340  -2
 -12   8   4 164.795 19.7340   1
  11  -3   4 1081.30 45.2347  -2
 -11   8   4 1081.30 45.2347   1
 -10   8   4 618.935 21.1999   1
  -9   8   4 751.375 20.5926   1
  -8   8   4 58.3290 6.19505   1
  -7   8   4 6.33080 2.14840   1
  -6   8   4 2.85479 2.43941   1
  -5   8   4 5.31292 2.47103   1
  -4   8   4 12.4895 2.56023   1
  -3   8   4 223.238 7.73275   1
  -2   8   4 193.559 7.11685   1
  -1   8   4 247.756 9.08147   1
   0   8   4 25.3388 3.15206   1
   1   8   4 146.700 8.38708   1
   2   8   4 414.871 19.8866   1
   3   8   4 64.8003 9.19317   1
   4   8   4 14.1568 5.07075   1
   5   8   4 -0.4340 4.70742   1
   6   8   4 -2.6456 4.41704   1
  14  -5   4 308.370 27.6965  -2
 -14   9   4 308.370 27.6965   1
  13  -4   4 310.533 26.1200  -2
 -13   9   4 310.533 26.1200   1
 -12   9   4 9.35878 4.02841   1
 -11   9   4 186.155 11.7616   1
 -10   9   4 87.7845 8.32719   1
  -9   9   4 1.45749 2.22875   1
  -8   9   4 6.75077 2.50565   1
  -7   9   4 59.9333 6.41386   1
  -6   9   4 40.3906 7.72756   1
  -5   9   4 364.492 15.9114   1
  -4   9   4 37.7079 3.85090   1
  -3   9   4 389.066 11.7208   1
  -2   9   4 718.403 17.0794   1
  -1   9   4 709.736 17.2378   1
   0   9   4 8.65227 2.61830   1
   1   9   4 153.048 10.3551   1
   2   9   4 297.642 17.5486   1
   3   9   4 17.7728 4.79870   1
   4   9   4 3.08367 4.28831   1
   5   9   4 8.90201 5.14515   1
 -13  10   4 117.234 10.7951   1
 -12  10   4 23.6668 4.20458   1
 -11  10   4 2.97128 3.35483   1
 -10  10   4 19.4190 3.47867   1
  -9  10   4 2.91094 2.49092   1
  -8  10   4 27.5064 3.54618   1
  -7  10   4 37.5952 4.05577   1
  -6  10   4 207.128 12.1353   1
  -5  10   4 159.756 9.46273   1
  -4  10   4 3.05593 2.25731   1
  -3  10   4 155.466 8.17587   1
  -2  10   4 444.395 13.3695   1
  -1  10   4 183.445 9.16501   1
   0  10   4 13.5735 3.21303   1
   1  10   4 18.5171 4.83807   1
   2  10   4 48.4985 8.89854   1
   3  10   4 -4.5321 5.70468   1
   4  10   4 -1.8414 6.48473   1
 -13  11   4 42.4960 6.00718   1
 -12  11   4 1.33601 3.23542   1
 -11  11   4 -3.4965 2.70516   1
 -10  11   4 2.30863 2.68127   1
  -9  11   4 161.081 10.0311   1
  -8  11   4 6.87909 2.68542   1
  -7  11   4 98.3697 7.99825   1
  -6  11   4 184.825 11.9661   1
  -5  11   4 124.704 9.00082   1
  -4  11   4 9.29183 2.99566   1
  -3  11   4 167.160 11.4111   1
  -2  11   4 221.852 13.8946   1
  -1  11   4 7.03254 2.66708   1
   0  11   4 -5.9412 4.34464   1
   2  11   4 5.44246 6.52797   1
  13  -1   4 66.3907 29.1992  -2
 -12  12   4 66.3907 29.1992   1
 -11  12   4 18.4026 3.77471   1
 -10  12   4 86.9472 9.17013   1
  -9  12   4 46.1631 6.63910   1
  -8  12   4 26.0278 4.36676   1
  -7  12   4 12.3840 3.00863   1
  -6  12   4 280.345 11.6004   1
  -5  12   4 219.009 21.3660   1
  -4  12   4 7.94660 3.76093   1
  -3  12   4 0.51904 2.38333   1
  -2  12   4 17.5854 3.43297   1
  -1  12   4 2.00461 4.03986   1
   0  12   4 -4.0611 2.94083   1
   1  12   4 13.0882 8.28183   1
  12   1   4 104.106 26.6295  -2
 -11  13   4 104.106 26.6295   1
 -10  13   4 6.33403 3.03487   1
  -9  13   4 218.366 11.7349   1
  -8  13   4 113.455 9.88731   1
  -7  13   4 -1.6750 2.18772   1
  -6  13   4 49.9349 7.21955   1
  -5  13   4 80.3594 8.76156   1
  -4  13   4 0.88400 4.01989   1
  -3  13   4 -3.2995 3.91748   1
  -2  13   4 -4.6982 3.73357   1
  -8  14   4 3.31188 3.45673   1
  -7  14   4 -8.3729 4.66033   1
  -6  14   4 -2.1497 2.42437   1
  -5  14   4 -3.0298 2.20702   1
   4 -16   5 187.972 18.4869   1
   5 -16   5 177.419 17.5888   1
   6 -16   5 1.84496 4.42674   1
   7 -16   5 84.4871 14.6251   1
   8 -16   5 165.433 17.2976   1
 -10  -6   5 215.910 37.4463  -2
   9 -16   5 215.910 37.4463   1
   1 -15   5 1.52498 4.98180   1
   2 -15   5 15.4911 5.47451   1
   3 -15   5 312.031 21.6006   1
   4 -15   5 685.515 32.6706   1
   5 -15   5 344.326 21.9730   1
   6 -15   5 40.7364 8.33191   1
   7 -15   5 45.6134 8.33476   1
   8 -15   5 46.6737 11.0496   1
   9 -15   5 97.7938 18.5189   1
 -11  -4   5 3.45297 27.3449  -2
  10 -15   5 3.45297 27.3449   1
 -12  -3   5 41.9949 32.3897  -2
  11 -15   5 41.9949 32.3897   1
  -1 -14   5 119.905 15.4439   1
   0 -14   5 239.289 18.5439   1
   1 -14   5 14.0463 5.93302   1
   2 -14   5 8.94898 4.70978   1
   3 -14   5 509.113 28.1262   1
   4 -14   5 970.464 36.7662   1
   5 -14   5 869.261 34.0029   1
   6 -14   5 121.427 14.1737   1
   7 -14   5 3.97645 3.99533   1
   8 -14   5 25.5848 6.01025   1
 -10  -4   5 3.98025 24.0199  -2
   9 -14   5 3.98025 24.0199   1
  10 -14   5 8.92778 4.14523   1
  11 -14   5 119.947 10.9021   1
  12 -14   5 350.039 16.2820   1
  -3 -13   5 -4.3581 2.49066   1
  -2 -13   5 162.175 16.1091   1
  -1 -13   5 134.547 16.2658   1
   0 -13   5 207.753 17.9967   1
   1 -13   5 414.756 22.0351   1
   2 -13   5 5.47929 3.94567   1
   3 -13   5 356.806 20.4174   1
   4 -13   5 689.245 28.8786   1
   5 -13   5 507.503 24.7014   1
   6 -13   5 129.389 13.6184   1
   7 -13   5 12.3791 4.72580   1
   8 -13   5 56.8536 7.05402   1
   9 -13   5 4.65814 2.86355   1
  10 -13   5 20.3237 4.31898   1
  11 -13   5 215.313 16.0872   1
  12 -13   5 567.564 31.6203   1
  13 -13   5 296.202 24.1890   1
  -4 -12   5 -0.7323 3.10165   1
  -3 -12   5 -0.9602 2.89796   1
  -2 -12   5 13.4142 3.33727   1
  -1 -12   5 297.697 18.6875   1
   0 -12   5 468.410 22.7550   1
   1 -12   5 233.633 16.3804   1
   2 -12   5 7.00669 3.79223   1
   3 -12   5 222.990 16.0494   1
   4 -12   5 328.186 18.7915   1
   5 -12   5 125.751 13.1321   1
   6 -12   5 70.9459 11.0262   1
   7 -12   5 219.054 10.9075   1
   8 -12   5 378.859 15.9304   1
   9 -12   5 131.149 12.9806   1
  10 -12   5 -4.9732 4.42795   1
  11 -12   5 463.301 26.7766   1
  12 -12   5 761.302 36.5507   1
 -13   1   5 587.085 34.8789  -2
  13 -12   5 587.085 34.8789   1
  -5 -11   5 10.6943 4.46268   1
  -4 -11   5 4.00106 3.24226   1
  -3 -11   5 174.256 11.0218   1
  -2 -11   5 6.48853 2.31794   1
  -1 -11   5 12.6847 4.46497   1
   0 -11   5 431.279 20.9201   1
   1 -11   5 250.016 16.0120   1
   2 -11   5 6.87120 3.71707   1
   3 -11   5 124.347 11.9425   1
   4 -11   5 51.6848 9.09324   1
   5 -11   5 0.53055 2.72945   1
   6 -11   5 17.1567 3.75040   1
   7 -11   5 157.800 9.52256   1
   8 -11   5 378.146 18.1220   1
   9 -11   5 500.304 16.9900   1
  10 -11   5 12.2480 3.22238   1
 -11   0   5 443.632 27.8822  -2
  11 -11   5 443.632 27.8822   1
 -12   1   5 1073.44 63.4851  -2
  12 -11   5 1073.44 63.4851   1
 -13   2   5 559.940 34.0469  -2
  13 -11   5 559.940 34.0469   1
 -14   3   5 152.218 33.7686  -2
  14 -11   5 152.218 33.7686   1
  -6 -10   5 332.424 17.2717   1
  -5 -10   5 128.238 12.8738   1
  -4 -10   5 12.3530 3.24988   1
  -3 -10   5 3.94533 2.63724   1
  -2 -10   5 27.7425 3.20072   1
  -1 -10   5 112.941 8.31688   1
   0 -10   5 94.0057 10.6903   1
   1 -10   5 -0.3711 2.73970   1
   2 -10   5 29.1615 5.27322   1
   3 -10   5 38.8331 7.13900   1
   4 -10   5 1.75883 2.41541   1
   5 -10   5 8.27224 1.84057   1
   6 -10   5 -1.9804 1.01935   1
   7 -10   5 359.495 12.9190   1
   8 -10   5 1134.53 27.1170   1
  -9  -1   5 640.180 29.0989  -2
   9 -10   5 640.180 29.0989   1
 -10   0   5 -19.825 12.8858  -2
  10 -10   5 -19.825 12.8858   1
 -11   1   5 468.378 28.5382  -2
  11 -10   5 468.378 28.5382   1
 -12   2   5 472.310 29.5217  -2
  12 -10   5 472.310 29.5217   1
 -13   3   5 315.582 26.2582  -2
  13 -10   5 315.582 26.2582   1
  -7  -9   5 283.774 20.0516   1
  -6  -9   5 285.393 16.1363   1
  -5  -9   5 189.154 15.1267   1
  -4  -9   5 19.3417 3.74489   1
  -3  -9   5 0.44585 2.24039   1
  -2  -9   5 18.6925 3.58662   1
  -1  -9   5 17.6943 3.38927   1
   0  -9   5 7.61428 3.26048   1
   1  -9   5 92.3088 8.01284   1
   2  -9   5 776.691 21.2840   1
   3  -9   5 137.382 8.93449   1
  -4  -5   5 450.831 32.0046  -2
   4  -9   5 450.831 32.0046   1
  -5  -4   5 484.315 33.9641  -2
   5  -9   5 484.315 33.9641   1
  -6  -3   5 578.584 28.0952  -2
   6  -9   5 578.584 28.0952   1
  -7  -2   5 156.773 12.1523  -2
   7  -9   5 156.773 12.1523   1
  -8  -1   5 290.878 14.4668  -2
   8  -9   5 290.878 14.4668   1
  -9   0   5 522.911 24.3236  -2
   9  -9   5 522.911 24.3236   1
 -10   1   5 -4.8778 12.3623  -2
  10  -9   5 -4.8778 12.3623   1
 -11   2   5 -15.565 13.4363  -2
  11  -9   5 -15.565 13.4363   1
 -12   3   5 27.7952 21.2660  -2
  12  -9   5 27.7952 21.2660   1
 -14   5   5 52.0408 23.5134  -2
  14  -9   5 52.0408 23.5134   1
  -8  -8   5 -6.7200 4.72691   1
  -7  -8   5 238.965 18.3216   1
  -6  -8   5 895.593 26.8541   1
  -5  -8   5 308.038 14.5655   1
  -4  -8   5 86.2421 8.49236   1
  -3  -8   5 184.928 10.1856   1
  -2  -8   5 223.713 9.07161   1
  -1  -8   5 -0.0191 1.29818   1
   0  -8   5 74.3935 4.97793   1
   1  -8   5 1841.25 37.7153   1
   2  -8   5 1134.06 26.4684   1
   3  -8   5 301.544 9.31044   1
   4  -8   5 2.78100 0.99155   1
  -5  -3   5 366.605 16.3452  -2
   5  -8   5 366.605 16.3452   1
  -6  -2   5 16.8496 6.06868  -2
   6  -8   5 16.8496 6.06868   1
  -7  -1   5 357.042 14.8586  -2
   7  -8   5 357.042 14.8586   1
  -8   0   5 146.367 10.8805  -2
   8  -8   5 146.367 10.8805   1
  -9   1   5 156.539 12.1844  -2
   9  -8   5 156.539 12.1844   1
 -10   2   5 137.878 23.8317  -2
  10  -8   5 137.878 23.8317   1
 -11   3   5 23.7081 17.2754  -2
  11  -8   5 23.7081 17.2754   1
 -14   6   5 21.5105 25.7325  -2
  14  -8   5 21.5105 25.7325   1
  -9  -7   5 125.461 17.1256   1
  -8  -7   5 -1.4407 3.98752   1
  -7  -7   5 142.636 14.3450   1
  -6  -7   5 64.9230 10.7317   1
  -5  -7   5 79.4682 8.32167   1
  -4  -7   5 428.703 15.3173   1
  -3  -7   5 741.670 17.5140   1
  -2  -7   5 878.578 16.9276   1
  -1  -7   5 939.727 17.2696   1
   0  -7   5 187.354 7.34191   1
   1  -7   5 1914.57 31.7299   1
  -2  -5   5 7053.10 217.798  -2
   2  -7   5 7053.10 217.798   1
  -3  -4   5 3086.95 74.4443  -2
   3  -7   5 3086.95 74.4443   1
  -4  -3   5 185.301 8.94285  -2
   4  -7   5 185.301 8.94285   1
  -5  -2   5 456.716 12.9620  -2
   5  -7   5 456.716 12.9620   1
  -6  -1   5 51.9163 5.70428  -2
   6  -7   5 51.9163 5.70428   1
  -7   0   5 13.7080 6.53019  -2
   7  -7   5 13.7080 6.53019   1
  -8   1   5 39.7815 15.1612  -2
   8  -7   5 39.7815 15.1612   1
  -9   2   5 226.856 24.8119  -2
   9  -7   5 226.856 24.8119   1
 -10   3   5 541.140 39.9939  -2
  10  -7   5 541.140 39.9939   1
 -11   4   5 64.4052 21.2385  -2
  11  -7   5 64.4052 21.2385   1
 -12   5   5 85.1288 24.8657  -2
  12  -7   5 85.1288 24.8657   1
 -14   7   5 43.3924 28.9392  -2
  14  -7   5 43.3924 28.9392   1
 -10  -6   5 304.901 24.5759   1
  -9  -6   5 86.0489 13.6404   1
  -8  -6   5 -0.9161 3.42222   1
  -7  -6   5 1.82533 3.57689   1
  -6  -6   5 14.5296 3.38423   1
  -5  -6   5 11.0437 2.47110   1
  -4  -6   5 377.782 11.5298   1
  -3  -6   5 1499.39 27.1544   1
  -2  -6   5 2948.95 45.8910   1
   1  -7   5 2100.77 76.8390  -2
  -1  -6   5 2100.77 76.8390   1
   0  -6   5 141.368 17.0846  -2
   0  -6   5 141.368 17.0846   1
  -1  -5   5 4396.80 99.0050  -2
   1  -6   5 4396.80 99.0050   1
  -2  -4   5 2159.06 48.1344  -2
   2  -6   5 2159.06 48.1344   1
  -3  -3   5 1149.24 29.5003  -2
   3  -6   5 1149.24 29.5003   1
  -4  -2   5 2126.11 42.6014  -2
   4  -6   5 2126.11 42.6014   1
  -5  -1   5 331.945 10.7823  -2
   5  -6   5 331.945 10.7823   1
  -6   0   5 173.697 7.73400  -2
   6  -6   5 173.697 7.73400   1
  -7   1   5 182.484 12.3067  -2
   7  -6   5 182.484 12.3067   1
  -8   2   5 255.044 20.0950  -2
   8  -6   5 255.044 20.0950   1
 -10   4   5 817.512 52.2794  -2
  10  -6   5 817.512 52.2794   1
 -11   5   5 10.1285 19.8236  -2
  11  -6   5 10.1285 19.8236   1
 -12   6   5 75.7464 26.9210  -2
  12  -6   5 75.7464 26.9210   1
 -11  -5   5 126.513 16.7931   1
 -10  -5   5 215.418 18.0879   1
  -9  -5   5 12.0308 4.82823   1
  -8  -5   5 5.02710 3.79436   1
  -7  -5   5 11.5928 4.18173   1
  -6  -5   5 172.090 10.0246   1
  -5  -5   5 16.7846 2.85095   1
  -4  -5   5 507.251 11.7484   1
   3  -8   5 2816.92 95.0001  -2
  -3  -5   5 2816.92 95.0001   1
   2  -7   5 7398.14 129.917  -2
  -2  -5   5 7398.14 129.917   1
   1  -6   5 4126.05 93.5340  -2
  -1  -5   5 4126.05 93.5340   1
   0  -5   5 24.2648 7.05729  -2
   0  -5   5 24.2648 7.05729   1
  -1  -4   5 1183.17 24.2057  -2
   1  -5   5 1183.17 24.2057   1
  -2  -3   5 3332.68 67.0314  -2
   2  -5   5 3332.68 67.0314   1
  -3  -2   5 2723.41 52.4250  -2
   3  -5   5 2723.41 52.4250   1
  -4  -1   5 2071.93 37.8536  -2
   4  -5   5 2071.93 37.8536   1
  -5   0   5 1261.14 25.7884  -2
   5  -5   5 1261.14 25.7884   1
  -6   1   5 2840.89 70.1873  -2
   6  -5   5 2840.89 70.1873   1
  -7   2   5 367.482 27.1501  -2
   7  -5   5 367.482 27.1501   1
  -8   3   5 186.061 14.2914  -2
   8  -5   5 186.061 14.2914   1
  -9   4   5 1704.11 79.1923  -2
   9  -5   5 1704.11 79.1923   1
 -10   5   5 782.266 53.2615  -2
  10  -5   5 782.266 53.2615   1
 -11   6   5 126.928 30.5924  -2
  11  -5   5 126.928 30.5924   1
 -12   7   5 59.6542 28.4871  -2
  12  -5   5 59.6542 28.4871   1
 -11  -4   5 20.4922 6.00667   1
 -10  -4   5 0.58729 4.22995   1
  -9  -4   5 0.11245 3.85682   1
  -8  -4   5 -5.0785 3.02490   1
  -7  -4   5 120.961 9.82345   1
  -6  -4   5 439.287 15.0263   1
  -5  -4   5 157.544 7.12480   1
  -4  -4   5 138.542 6.44832   1
   3  -7   5 3514.04 55.8471  -2
  -3  -4   5 3514.04 55.8471   1
   2  -6   5 2277.29 43.7735  -2
  -2  -4   5 2277.29 43.7735   1
   1  -5   5 1265.35 30.5974  -2
  -1  -4   5 1265.35 30.5974   1
   0  -4   5 29.2343 4.04472  -2
   0  -4   5 29.2343 4.04472   1
  -1  -3   5 1356.01 28.3273  -2
   1  -4   5 1356.01 28.3273   1
  -2  -2   5 115.516 5.93004  -2
   2  -4   5 115.516 5.93004   1
  -3  -1   5 182.635 6.60928  -2
   3  -4   5 182.635 6.60928   1
  -4   0   5 930.066 20.1012  -2
   4  -4   5 930.066 20.1012   1
  -5   1   5 5277.41 92.1774  -2
   5  -4   5 5277.41 92.1774   1
  -6   2   5 3900.46 93.3345  -2
   6  -4   5 3900.46 93.3345   1
  -8   4   5 719.508 44.2267  -2
   8  -4   5 719.508 44.2267   1
  -9   5   5 1089.21 61.6767  -2
   9  -4   5 1089.21 61.6767   1
 -10   6   5 838.054 57.6108  -2
  10  -4   5 838.054 57.6108   1
 -11   7   5 214.335 37.5875  -2
  11  -4   5 214.335 37.5875   1
  13  -4   5 -9.6211 7.57431   1
  14  -4   5 2.06135 9.35397   1
 -12  -3   5 54.5015 9.21513   1
 -11  -3   5 10.2908 6.22866   1
 -10  -3   5 83.8106 12.2455   1
  -9  -3   5 333.177 19.0990   1
  -8  -3   5 109.374 9.91569   1
  -7  -3   5 33.8817 4.40246   1
  -6  -3   5 508.236 13.0686   1
   5  -8   5 430.494 16.3568  -2
  -5  -3   5 430.494 16.3568   1
   4  -7   5 216.289 7.48858  -2
  -4  -3   5 216.289 7.48858   1
   3  -6   5 1326.00 19.6419  -2
  -3  -3   5 1326.00 19.6419   1
   2  -5   5 3504.85 54.1088  -2
  -2  -3   5 3504.85 54.1088   1
   1  -4   5 1481.76 25.7146  -2
  -1  -3   5 1481.76 25.7146   1
   0  -3   5 1.70625 3.21243  -2
   0  -3   5 1.70625 3.21243   1
  -1  -2   5 631.529 22.3402  -2
   1  -3   5 631.529 22.3402   1
  -2  -1   5 61.8079 4.57895  -2
   2  -3   5 61.8079 4.57895   1
  -3   0   5 121.034 5.33443  -2
   3  -3   5 121.034 5.33443   1
  -4   1   5 3526.50 70.6340  -2
   4  -3   5 3526.50 70.6340   1
  -5   2   5 2524.23 63.7117  -2
   5  -3   5 2524.23 63.7117   1
  -6   3   5 2200.18 59.1043  -2
   6  -3   5 2200.18 59.1043   1
  -7   4   5 1034.45 48.6845  -2
   7  -3   5 1034.45 48.6845   1
  -8   5   5 293.582 15.7025  -2
   8  -3   5 293.582 15.7025   1
  -9   6   5 610.189 46.3373  -2
   9  -3   5 610.189 46.3373   1
 -10   7   5 203.736 35.4329  -2
  10  -3   5 203.736 35.4329   1
  11  -3   5 45.4239 12.4115   1
  12  -3   5 11.4834 10.0295   1
  13  -3   5 34.6724 12.0173   1
 -12  -2   5 212.481 30.0573   1
 -11  -2   5 2.94038 3.72254   1
 -10  -2   5 96.2415 12.2549   1
  -9  -2   5 176.526 14.7777   1
   8 -10   5 1032.10 33.2918  -2
  -8  -2   5 1032.10 33.2918   1
   7  -9   5 169.240 9.68684  -2
  -7  -2   5 169.240 9.68684   1
   6  -8   5 4.71923 5.34426  -2
  -6  -2   5 4.71923 5.34426   1
   5  -7   5 571.928 12.3533  -2
  -5  -2   5 571.928 12.3533   1
   4  -6   5 2234.51 37.2886  -2
  -4  -2   5 2234.51 37.2886   1
   3  -5   5 2559.24 35.8517  -2
  -3  -2   5 2559.24 35.8517   1
   2  -4   5 105.800 4.59648  -2
  -2  -2   5 105.800 4.59648   1
   1  -3   5 590.827 17.9661  -2
  -1  -2   5 590.827 17.9661   1
   0  -2   5 16.8724 3.39573  -2
   0  -2   5 16.8724 3.39573   1
  -1  -1   5 1526.20 29.4039  -2
   1  -2   5 1526.20 29.4039   1
  -2   0   5 1114.89 20.6187  -2
   2  -2   5 1114.89 20.6187   1
  -3   1   5 151.281 7.22892  -2
   3  -2   5 151.281 7.22892   1
  -4   2   5 1559.09 36.3147  -2
   4  -2   5 1559.09 36.3147   1
  -5   3   5 6505.95 126.155  -2
   5  -2   5 6505.95 126.155   1
  -6   4   5 3500.27 93.3696  -2
   6  -2   5 3500.27 93.3696   1
  -7   5   5 246.194 13.3839  -2
   7  -2   5 246.194 13.3839   1
  -8   6   5 81.4566 23.1765  -2
   8  -2   5 81.4566 23.1765   1
   9  -2   5 96.7956 14.8309   1
  10  -2   5 73.2786 23.1788   1
  11  -2   5 82.2136 16.9458   1
  12  -2   5 39.4124 6.44975   1
  13  -2   5 124.311 32.6429   1
 -13  -1   5 416.448 41.5501   1
 -12  -1   5 355.476 36.1281   1
 -11  -1   5 22.7460 7.96446   1
  10 -11   5 413.626 37.3909  -2
 -10  -1   5 413.626 37.3909   1
   9 -10   5 732.416 24.5002  -2
  -9  -1   5 732.416 24.5002   1
   8  -9   5 231.463 13.9684  -2
  -8  -1   5 231.463 13.9684   1
   7  -8   5 315.522 11.8285  -2
  -7  -1   5 315.522 11.8285   1
   6  -7   5 64.5251 4.50527  -2
  -6  -1   5 64.5251 4.50527   1
   5  -6   5 390.223 10.7880  -2
  -5  -1   5 390.223 10.7880   1
   4  -5   5 2228.94 35.4209  -2
  -4  -1   5 2228.94 35.4209   1
   3  -4   5 179.980 5.00180  -2
  -3  -1   5 179.980 5.00180   1
   2  -3   5 71.7844 3.07289  -2
  -2  -1   5 71.7844 3.07289   1
   1  -2   5 1513.33 29.0407  -2
  -1  -1   5 1513.33 29.0407   1
   0  -1   5 622.995 20.1979  -2
   0  -1   5 622.995 20.1979   1
  -1   0   5 1813.22 37.9038  -2
   1  -1   5 1813.22 37.9038   1
  -2   1   5 2717.44 59.9150  -2
   2  -1   5 2717.44 59.9150   1
  -3   2   5 524.199 21.2484  -2
   3  -1   5 524.199 21.2484   1
  -4   3   5 2388.94 50.3751  -2
   4  -1   5 2388.94 50.3751   1
  -5   4   5 3543.53 93.6845  -2
   5  -1   5 3543.53 93.6845   1
   6  -1   5 1074.86 33.1756   1
   7  -1   5 339.865 15.1094   1
   8  -1   5 6.23131 6.00863   1
   9  -1   5 -2.6130 4.09457   1
  10  -1   5 4.51235 7.51511   1
  11  -1   5 1.57233 5.93745   1
  12  -1   5 22.5229 11.9143   1
 -13   0   5 649.935 50.3181   1
  11 -11   5 377.100 35.2686  -2
 -11   0   5 377.100 35.2686   1
  10 -10   5 16.1165 30.6649  -2
 -10   0   5 16.1165 30.6649   1
   9  -9   5 397.678 18.6034  -2
  -9   0   5 397.678 18.6034   1
   8  -8   5 154.623 9.20344  -2
  -8   0   5 154.623 9.20344   1
   7  -7   5 21.5209 5.65921  -2
  -7   0   5 21.5209 5.65921   1
   6  -6   5 195.533 12.6543  -2
  -6   0   5 195.533 12.6543   1
   5  -5   5 1305.00 26.8667  -2
  -5   0   5 1305.00 26.8667   1
   4  -4   5 996.275 21.1781  -2
  -4   0   5 996.275 21.1781   1
   3  -3   5 143.182 8.18239  -2
  -3   0   5 143.182 8.18239   1
   2  -2   5 1023.03 26.0530  -2
  -2   0   5 1023.03 26.0530   1
   1  -1   5 2051.85 32.2110  -2
  -1   0   5 2051.85 32.2110   1
   0   0   5 454.889 10.8761  -2
   0   0   5 454.889 10.8761   1
  -1   1   5 1437.52 46.9434  -2
   1   0   5 1437.52 46.9434   1
  -2   2   5 281.980 13.4493  -2
   2   0   5 281.980 13.4493   1
  -3   3   5 420.434 18.4651  -2
   3   0   5 420.434 18.4651   1
   4   0   5 95.5921 6.21275   1
   5   0   5 941.352 21.4775   1
   6   0   5 100.000 7.24199   1
   7   0   5 18.8112 4.97858   1
   8   0   5 5.06499 4.23533   1
   9   0   5 11.5512 6.10664   1
  10   0   5 80.6283 14.3300   1
  11   0   5 54.1148 15.1554   1
  12   0   5 -2.8787 7.97457   1
  13 -12   5 570.703 47.5702  -2
 -13   1   5 570.703 47.5702   1
  11 -10   5 442.454 30.0871  -2
 -11   1   5 442.454 30.0871   1
  10  -9   5 -12.128 14.6948  -2
 -10   1   5 -12.128 14.6948   1
   9  -8   5 132.805 9.37726  -2
  -9   1   5 132.805 9.37726   1
   8  -7   5 43.0268 5.61326  -2
  -8   1   5 43.0268 5.61326   1
   7  -6   5 196.992 19.3339  -2
  -7   1   5 196.992 19.3339   1
   6  -5   5 2721.14 43.7894  -2
  -6   1   5 2721.14 43.7894   1
   5  -4   5 5697.46 96.4965  -2
  -5   1   5 5697.46 96.4965   1
   4  -3   5 4106.66 120.778  -2
  -4   1   5 4106.66 120.778   1
   3  -2   5 129.524 7.21770  -2
  -3   1   5 129.524 7.21770   1
   2  -1   5 2313.97 51.6440  -2
  -2   1   5 2313.97 51.6440   1
   1   0   5 1858.54 33.2177  -2
  -1   1   5 1858.54 33.2177   1
   0   1   5 1093.77 31.2936  -2
   0   1   5 1093.77 31.2936   1
  -1   2   5 342.213 11.3851  -2
   1   1   5 342.213 11.3851   1
   2   1   5 3.07032 1.24328   1
   3   1   5 468.640 12.8786   1
   4   1   5 581.278 15.3616   1
   5   1   5 215.474 11.4789   1
   6   1   5 -1.1315 2.12603   1
   7   1   5 143.962 14.6834   1
   8   1   5 33.5084 7.19652   1
   9   1   5 108.434 14.4305   1
  10   1   5 343.372 38.4280   1
  11   1   5 10.4674 8.39839   1
 -14   2   5 32.7984 9.97256   1
  13 -11   5 481.480 42.5843  -2
 -13   2   5 481.480 42.5843   1
  11  -9   5 -9.5341 7.83338  -2
 -11   2   5 -9.5341 7.83338   1
  10  -8   5 218.940 11.6975  -2
 -10   2   5 218.940 11.6975   1
   9  -7   5 265.747 11.4410  -2
  -9   2   5 265.747 11.4410   1
   8  -6   5 312.040 11.1943  -2
  -8   2   5 312.040 11.1943   1
   7  -5   5 309.846 10.0301  -2
  -7   2   5 309.846 10.0301   1
   6  -4   5 3542.03 62.7969  -2
  -6   2   5 3542.03 62.7969   1
   5  -3   5 2753.81 87.4795  -2
  -5   2   5 2753.81 87.4795   1
   4  -2   5 1836.04 42.7919  -2
  -4   2   5 1836.04 42.7919   1
   3  -1   5 489.733 14.0419  -2
  -3   2   5 489.733 14.0419   1
   2   0   5 241.863 9.65324  -2
  -2   2   5 241.863 9.65324   1
   1   1   5 328.625 13.8105  -2
  -1   2   5 328.625 13.8105   1
   0   2   5 72.6572 4.25217   1
   1   2   5 153.467 5.27631   1
   2   2   5 399.114 9.58864   1
   3   2   5 638.651 13.7256   1
   4   2   5 639.172 14.5041   1
   5   2   5 72.9974 5.79454   1
   6   2   5 106.137 9.22565   1
   7   2   5 182.091 16.4170   1
   8   2   5 1.46370 4.54158   1
   9   2   5 10.0082 5.34611   1
  10   2   5 4.48692 6.47742   1
  11   2   5 -8.2741 7.16859   1
  14 -11   5 147.482 28.9469  -2
 -14   3   5 147.482 28.9469   1
  13 -10   5 347.091 35.6508  -2
 -13   3   5 347.091 35.6508   1
  12  -9   5 70.5023 19.8177  -2
 -12   3   5 70.5023 19.8177   1
  11  -8   5 54.3950 8.50934  -2
 -11   3   5 54.3950 8.50934   1
  10  -7   5 630.577 18.6306  -2
 -10   3   5 630.577 18.6306   1
   9  -6   5 858.651 21.7879  -2
  -9   3   5 858.651 21.7879   1
   8  -5   5 242.755 14.8368  -2
  -8   3   5 242.755 14.8368   1
   7  -4   5 398.936 25.8561  -2
  -7   3   5 398.936 25.8561   1
   6  -3   5 1997.16 67.8682  -2
  -6   3   5 1997.16 67.8682   1
   5  -2   5 6578.30 182.298  -2
  -5   3   5 6578.30 182.298   1
   4  -1   5 3235.51 98.1904  -2
  -4   3   5 3235.51 98.1904   1
   3   0   5 530.798 40.4852  -2
  -3   3   5 530.798 40.4852   1
  -2   3   5 60.1815 4.58296   1
  -1   3   5 11.0900 1.61086   1
   0   3   5 45.3808 3.14553   1
   1   3   5 6.82999 1.31160   1
   2   3   5 914.970 17.2154   1
   3   3   5 1587.63 26.9908   1
   4   3   5 1567.28 28.0840   1
   5   3   5 43.2715 5.06925   1
   6   3   5 556.498 25.8780   1
   7   3   5 452.783 24.5953   1
   8   3   5 54.0356 8.86413   1
   9   3   5 3.12105 4.95523   1
  10   3   5 5.39664 5.93979   1
  14 -10   5 55.3872 22.6112  -2
 -14   4   5 55.3872 22.6112   1
  13  -9   5 -3.3766 15.9284  -2
 -13   4   5 -3.3766 15.9284   1
  12  -8   5 -4.5779 11.4606  -2
 -12   4   5 -4.5779 11.4606   1
  11  -7   5 79.1700 7.95728  -2
 -11   4   5 79.1700 7.95728   1
  10  -6   5 944.221 23.7691  -2
 -10   4   5 944.221 23.7691   1
   9  -5   5 1809.67 37.2426  -2
  -9   4   5 1809.67 37.2426   1
   8  -4   5 849.371 33.6224  -2
  -8   4   5 849.371 33.6224   1
   7  -3   5 751.360 35.6621  -2
  -7   4   5 751.360 35.6621   1
   6  -2   5 2913.51 62.9101  -2
  -6   4   5 2913.51 62.9101   1
   5  -1   5 3450.85 83.9737  -2
  -5   4   5 3450.85 83.9737   1
  -4   4   5 739.450 17.6316   1
  -3   4   5 798.213 18.8048   1
  -2   4   5 264.356 9.36412   1
  -1   4   5 138.484 6.69646   1
   0   4   5 313.999 8.69057   1
   1   4   5 17.2323 2.08791   1
   2   4   5 941.619 18.1887   1
   3   4   5 1746.64 29.6619   1
   4   4   5 1524.89 31.4299   1
   5   4   5 2.43102 2.94110   1
   6   4   5 30.5527 6.14629   1
   7   4   5 20.8158 5.62385   1
   8   4   5 32.4028 9.67950   1
   9   4   5 7.89631 7.42888   1
  14  -9   5 45.6093 19.0008  -2
 -14   5   5 45.6093 19.0008   1
  13  -8   5 38.4460 22.4384  -2
 -13   5   5 38.4460 22.4384   1
  12  -7   5 110.070 16.7598  -2
 -12   5   5 110.070 16.7598   1
  11  -6   5 43.2303 7.89119  -2
 -11   5   5 43.2303 7.89119   1
  10  -5   5 798.911 29.3737  -2
 -10   5   5 798.911 29.3737   1
   9  -4   5 1050.54 39.7112  -2
  -9   5   5 1050.54 39.7112   1
   8  -3   5 359.027 14.1497  -2
  -8   5   5 359.027 14.1497   1
   7  -2   5 222.388 12.6328  -2
  -7   5   5 222.388 12.6328   1
  -6   5   5 460.139 17.3038   1
  -5   5   5 744.583 18.7708   1
  -4   5   5 357.061 9.36884   1
  -3   5   5 344.378 11.4771   1
  -2   5   5 322.038 10.5169   1
  -1   5   5 456.461 9.44838   1
   0   5   5 528.911 12.8155   1
   1   5   5 84.1271 5.66377   1
   2   5   5 1335.20 24.0497   1
   3   5   5 1453.41 29.9712   1
   4   5   5 498.023 15.6856   1
   5   5   5 427.467 22.8701   1
   6   5   5 13.4370 5.29464   1
   7   5   5 -0.9443 4.39500   1
   8   5   5 -1.1474 6.71183   1
   9   5   5 24.5183 7.64944   1
  14  -8   5 43.9054 16.6153  -2
 -14   6   5 43.9054 16.6153   1
  13  -7   5 185.171 29.2285  -2
 -13   6   5 185.171 29.2285   1
  12  -6   5 46.0159 16.6708  -2
 -12   6   5 46.0159 16.6708   1
  11  -5   5 138.411 17.7880  -2
 -11   6   5 138.411 17.7880   1
  10  -4   5 719.418 32.2594  -2
 -10   6   5 719.418 32.2594   1
   9  -3   5 628.583 20.4961  -2
  -9   6   5 628.583 20.4961   1
   8  -2   5 71.4420 11.3015  -2
  -8   6   5 71.4420 11.3015   1
  -7   6   5 122.663 7.72687   1
  -6   6   5 199.524 9.23228   1
  -5   6   5 163.513 7.96761   1
  -4   6   5 0.21478 1.27106   1
  -3   6   5 13.8087 2.10580   1
  -2   6   5 395.042 9.08517   1
  -1   6   5 1481.98 23.7812   1
   0   6   5 737.355 17.3067   1
   1   6   5 12.5361 2.49618   1
   2   6   5 389.226 12.9572   1
   3   6   5 1027.03 24.2569   1
   4   6   5 425.969 17.5829   1
   5   6   5 147.484 14.7227   1
   6   6   5 4.44776 4.81827   1
   7   6   5 11.0244 5.41922   1
   8   6   5 -1.9284 6.74207   1
  14  -7   5 86.9051 25.8765  -2
 -14   7   5 86.9051 25.8765   1
  12  -5   5 75.3742 21.4521  -2
 -12   7   5 75.3742 21.4521   1
  11  -4   5 213.210 14.3460  -2
 -11   7   5 213.210 14.3460   1
  10  -3   5 227.818 14.5170  -2
 -10   7   5 227.818 14.5170   1
  -9   7   5 19.2431 5.18457   1
  -8   7   5 4.77588 2.13546   1
  -7   7   5 44.7246 6.13300   1
  -6   7   5 383.487 13.8410   1
  -5   7   5 0.38560 1.65725   1
  -4   7   5 87.1245 5.57633   1
  -3   7   5 12.1633 1.92103   1
  -2   7   5 501.951 11.2511   1
  -1   7   5 866.560 16.4772   1
   0   7   5 447.251 12.3234   1
   1   7   5 14.6777 2.83338   1
   2   7   5 245.955 11.3608   1
   3   7   5 250.362 11.6659   1
   4   7   5 165.309 15.8270   1
   5   7   5 188.949 26.5282   1
   6   7   5 112.196 16.2018   1
   7   7   5 194.191 19.7036   1
  14  -6   5 6.48158 24.1081  -2
 -14   8   5 6.48158 24.1081   1
  12  -4   5 51.9476 12.3749  -2
 -12   8   5 51.9476 12.3749   1
  11  -3   5 83.3919 15.7610  -2
 -11   8   5 83.3919 15.7610   1
 -10   8   5 6.80647 2.87622   1
  -9   8   5 1.90137 2.24310   1
  -8   8   5 200.152 9.46216   1
  -7   8   5 279.513 12.6475   1
  -6   8   5 89.7566 7.99032   1
  -5   8   5 75.9399 7.24089   1
  -4   8   5 2.70826 1.99112   1
  -3   8   5 5.65150 1.62644   1
  -2   8   5 109.194 6.11391   1
  -1   8   5 207.220 8.41968   1
   0   8   5 65.0889 6.10169   1
   1   8   5 38.3752 6.55014   1
   2   8   5 9.60522 3.04834   1
   3   8   5 13.8213 4.79282   1
   4   8   5 4.27202 4.45953   1
   5   8   5 6.26721 4.99760   1
   6   8   5 207.402 19.5518   1
 -13   9   5 36.0117 6.47576   1
 -12   9   5 23.0140 5.89564   1
 -11   9   5 346.051 14.1154   1
 -10   9   5 137.537 9.19518   1
  -9   9   5 21.5838 3.32620   1
  -8   9   5 369.503 13.0999   1
  -7   9   5 1286.07 32.7061   1
  -6   9   5 87.9607 9.03256   1
  -5   9   5 97.8192 8.62570   1
  -4   9   5 636.919 18.0406   1
  -3   9   5 21.0997 2.68607   1
  -2   9   5 12.9103 2.40259   1
  -1   9   5 75.4486 6.47404   1
   0   9   5 -2.7765 2.41582   1
   1   9   5 47.5074 5.96576   1
   2   9   5 17.6304 4.33398   1
   3   9   5 -2.7513 5.45555   1
   4   9   5 0.66377 4.38136   1
   5   9   5 0.92194 4.50950   1
 -13  10   5 66.3581 7.92767   1
 -12  10   5 342.431 14.6574   1
 -11  10   5 273.379 13.0830   1
 -10  10   5 249.683 11.9172   1
  -9  10   5 39.3743 5.83583   1
  -8  10   5 690.311 18.8893   1
  -7  10   5 453.990 17.5989   1
  -6  10   5 166.074 10.9283   1
  -5  10   5 3.80073 2.21647   1
  -4  10   5 58.3633 6.86731   1
  -3  10   5 4.00668 2.15478   1
  -2  10   5 -0.5285 2.10896   1
  -1  10   5 -1.1017 2.22262   1
   0  10   5 104.128 12.8241   1
   1  10   5 188.082 19.1052   1
   2  10   5 27.8570 9.13574   1
   3  10   5 15.0515 8.58221   1
 -12  11   5 417.075 16.5419   1
 -11  11   5 469.213 17.0962   1
 -10  11   5 109.741 9.34432   1
  -9  11   5 19.5133 3.51549   1
  -8  11   5 291.557 12.2005   1
  -7  11   5 454.010 15.8642   1
  -6  11   5 229.003 12.0549   1
  -5  11   5 183.104 9.82941   1
  -4  11   5 47.2548 6.05377   1
  -3  11   5 155.093 8.84489   1
  -2  11   5 27.4180 5.25502   1
  -1  11   5 33.8935 7.09110   1
   0  11   5 233.671 24.8172   1
   1  11   5 188.090 24.1670   1
   2  11   5 28.6859 9.68817   1
  12   0   5 305.129 32.2469  -2
 -11  12   5 305.129 32.2469   1
  11   1   5 229.301 26.5200  -2
 -10  12   5 229.301 26.5200   1
  -9  12   5 3.26698 2.77221   1
  -8  12   5 55.8672 9.19958   1
  -7  12   5 82.0973 7.93278   1
  -6  12   5 48.9029 7.89126   1
  -5  12   5 165.228 12.5386   1
  -4  12   5 438.663 15.7373   1
  -3  12   5 256.124 13.6075   1
  -2  12   5 68.7332 10.6322   1
  -1  12   5 6.43652 4.37433   1
   0  12   5 302.079 29.3342   1
 -10  13   5 68.4247 8.42350   1
  -9  13   5 20.3316 4.39764   1
  -8  13   5 -6.0288 2.36141   1
  -7  13   5 -4.0785 3.38980   1
  -6  13   5 2.40002 2.50840   1
  -5  13   5 208.996 12.0130   1
  -4  13   5 401.104 16.0170   1
  -3  13   5 306.339 14.5684   1
   4 -16   6 19.4525 6.04186   1
   5 -16   6 79.2767 14.3737   1
   6 -16   6 13.4572 5.66489   1
   7 -16   6 2.71956 4.78009   1
   8 -16   6 20.2638 6.57022   1
 -10  -6   6 2.76672 29.8353  -2
   9 -16   6 2.76672 29.8353   1
   1 -15   6 2.80224 4.64507   1
   2 -15   6 24.9883 6.20330   1
   3 -15   6 22.1538 6.14265   1
   4 -15   6 4.47828 5.16665   1
   5 -15   6 4.66207 5.75600   1
   6 -15   6 3.60768 5.18826   1
   7 -15   6 33.5022 8.98631   1
   8 -15   6 15.8978 8.79714   1
   9 -15   6 -3.6534 4.09328   1
 -11  -4   6 132.448 32.8182  -2
  10 -15   6 132.448 32.8182   1
 -12  -3   6 183.334 38.0659  -2
  11 -15   6 183.334 38.0659   1
  -1 -14   6 459.766 25.2984   1
   0 -14   6 156.466 16.1807   1
   1 -14   6 34.1564 7.88539   1
   2 -14   6 6.29459 4.15969   1
   3 -14   6 -4.1610 4.00975   1
   4 -14   6 4.51514 4.14427   1
   5 -14   6 78.4447 18.9397   1
   6 -14   6 170.648 15.7715   1
   7 -14   6 194.540 16.8475   1
   8 -14   6 28.0349 6.29168   1
   9 -14   6 16.2298 4.51198   1
  10 -14   6 83.8891 10.4927   1
  11 -14   6 49.1004 6.23476   1
  12 -14   6 11.8181 5.63734   1
  -3 -13   6 27.4680 5.19632   1
  -2 -13   6 130.649 15.0133   1
  -1 -13   6 253.508 19.0207   1
   0 -13   6 22.7375 8.11135   1
   1 -13   6 73.1896 11.9561   1
   2 -13   6 9.14395 4.14459   1
   3 -13   6 99.6768 12.8042   1
   4 -13   6 2.68565 3.69870   1
   5 -13   6 189.038 16.0743   1
   6 -13   6 339.584 20.7257   1
   7 -13   6 438.236 23.3958   1
   8 -13   6 93.5408 8.29533   1
   9 -13   6 30.5864 5.03605   1
  10 -13   6 157.248 16.7310   1
  11 -13   6 0.48759 3.37212   1
  12 -13   6 -4.2814 4.92857   1
  13 -13   6 23.9358 6.59121   1
  -4 -12   6 13.0679 3.70881   1
  -3 -12   6 6.74359 3.00966   1
  -2 -12   6 202.693 11.1467   1
  -1 -12   6 82.2079 12.5349   1
   0 -12   6 61.1741 10.9540   1
   1 -12   6 295.112 18.3097   1
   2 -12   6 341.817 19.3711   1
   3 -12   6 552.970 24.6599   1
   4 -12   6 5.08001 3.89589   1
   5 -12   6 22.9760 5.53902   1
   6 -12   6 681.708 26.8423   1
   7 -12   6 762.103 21.2940   1
   8 -12   6 83.3747 8.86618   1
   9 -12   6 -1.5603 2.94415   1
  10 -12   6 22.7224 3.89692   1
  11 -12   6 11.1596 5.20437   1
 -13   1   6 -13.347 25.5793  -2
  13 -12   6 -13.347 25.5793   1
  -5 -11   6 209.990 14.7554   1
  -4 -11   6 27.0447 8.73612   1
  -3 -11   6 -3.2842 2.40514   1
  -2 -11   6 -1.1289 2.20932   1
  -1 -11   6 9.29062 4.40751   1
   0 -11   6 22.2155 4.92558   1
   1 -11   6 200.784 14.6818   1
   2 -11   6 478.163 22.0364   1
   3 -11   6 920.604 32.2754   1
   4 -11   6 163.220 13.1332   1
   5 -11   6 29.6517 5.72084   1
   6 -11   6 436.342 14.7441   1
   7 -11   6 502.460 15.4735   1
   8 -11   6 146.034 11.2372   1
   9 -11   6 2.73476 3.19080   1
 -10  -1   6 -19.686 13.0206  -2
  10 -11   6 -19.686 13.0206   1
 -11   0   6 171.578 20.3186  -2
  11 -11   6 171.578 20.3186   1
 -12   1   6 14.4044 24.5886  -2
  12 -11   6 14.4044 24.5886   1
 -13   2   6 -2.1123 17.9968  -2
  13 -11   6 -2.1123 17.9968   1
 -14   3   6 378.715 43.7370  -2
  14 -11   6 378.715 43.7370   1
  -6 -10   6 46.9582 5.91037   1
  -5 -10   6 14.1927 4.29949   1
  -4 -10   6 3.61817 2.95442   1
  -3 -10   6 -2.5752 2.25259   1
  -2 -10   6 8.60512 2.49228   1
  -1 -10   6 70.8166 6.43924   1
   0 -10   6 65.1796 9.70774   1
   1 -10   6 244.074 15.1565   1
   2 -10   6 804.024 27.1191   1
   3 -10   6 1021.98 31.3316   1
   4 -10   6 532.179 21.7961   1
   5 -10   6 8.92210 1.94029   1
   6 -10   6 287.541 10.6913   1
  -7  -3   6 599.957 32.1847  -2
   7 -10   6 599.957 32.1847   1
  -8  -2   6 21.8996 11.1493  -2
   8 -10   6 21.8996 11.1493   1
  -9  -1   6 510.312 39.9775  -2
   9 -10   6 510.312 39.9775   1
 -10   0   6 378.778 24.7896  -2
  10 -10   6 378.778 24.7896   1
 -11   1   6 455.770 27.7598  -2
  11 -10   6 455.770 27.7598   1
 -12   2   6 47.9194 22.3246  -2
  12 -10   6 47.9194 22.3246   1
 -13   3   6 168.361 22.0338  -2
  13 -10   6 168.361 22.0338   1
 -14   4   6 556.691 34.8680  -2
  14 -10   6 556.691 34.8680   1
  -7  -9   6 -5.0370 5.15500   1
  -6  -9   6 12.5717 3.91393   1
  -5  -9   6 -1.8259 2.90918   1
  -4  -9   6 5.17323 2.94405   1
  -3  -9   6 74.4353 8.03586   1
  -2  -9   6 46.4064 6.57745   1
  -1  -9   6 291.842 11.2517   1
   0  -9   6 353.860 17.1278   1
   1  -9   6 51.7649 7.50317   1
   2  -9   6 779.844 21.6575   1
  -3  -6   6 1378.30 60.9166  -2
   3  -9   6 1378.30 60.9166   1
  -4  -5   6 990.463 48.9387  -2
   4  -9   6 990.463 48.9387   1
  -5  -4   6 43.9573 12.7517  -2
   5  -9   6 43.9573 12.7517   1
  -6  -3   6 315.191 17.0297  -2
   6  -9   6 315.191 17.0297   1
  -7  -2   6 343.168 13.4430  -2
   7  -9   6 343.168 13.4430   1
  -8  -1   6 573.933 20.1644  -2
   8  -9   6 573.933 20.1644   1
  -9   0   6 85.1995 12.6216  -2
   9  -9   6 85.1995 12.6216   1
 -10   1   6 551.016 29.2677  -2
  10  -9   6 551.016 29.2677   1
 -11   2   6 816.069 36.7920  -2
  11  -9   6 816.069 36.7920   1
 -12   3   6 161.434 28.0222  -2
  12  -9   6 161.434 28.0222   1
 -13   4   6 44.3771 22.0065  -2
  13  -9   6 44.3771 22.0065   1
 -14   5   6 504.500 47.8493  -2
  14  -9   6 504.500 47.8493   1
  -8  -8   6 -4.6475 4.04726   1
  -7  -8   6 54.5545 8.02517   1
  -6  -8   6 6.09455 3.09195   1
  -5  -8   6 101.715 10.1567   1
  -4  -8   6 213.680 11.4539   1
  -3  -8   6 131.835 8.87954   1
  -2  -8   6 159.282 7.78862   1
  -1  -8   6 755.334 15.3735   1
   0  -8   6 84.8369 5.78430   1
  -1  -7   6 22.7388 14.5943  -2
   1  -8   6 22.7388 14.5943   1
  -2  -6   6 1038.56 48.1346  -2
   2  -8   6 1038.56 48.1346   1
  -3  -5   6 284.792 24.4829  -2
   3  -8   6 284.792 24.4829   1
  -4  -4   6 64.1098 15.6865  -2
   4  -8   6 64.1098 15.6865   1
  -5  -3   6 -3.2782 5.36038  -2
   5  -8   6 -3.2782 5.36038   1
  -6  -2   6 13.8273 7.31713  -2
   6  -8   6 13.8273 7.31713   1
  -7  -1   6 21.5065 7.16506  -2
   7  -8   6 21.5065 7.16506   1
  -8   0   6 75.7655 12.0878  -2
   8  -8   6 75.7655 12.0878   1
  -9   1   6 471.540 19.2979  -2
   9  -8   6 471.540 19.2979   1
 -10   2   6 1331.08 66.9455  -2
  10  -8   6 1331.08 66.9455   1
 -11   3   6 793.988 52.0814  -2
  11  -8   6 793.988 52.0814   1
 -12   4   6 87.4650 23.8768  -2
  12  -8   6 87.4650 23.8768   1
 -14   6   6 102.613 31.2834  -2
  14  -8   6 102.613 31.2834   1
  -9  -7   6 51.4495 9.03347   1
  -8  -7   6 349.045 21.0294   1
  -7  -7   6 145.215 14.1087   1
  -6  -7   6 2.45351 2.67620   1
  -5  -7   6 220.273 11.8338   1
   4 -11   6 806.225 43.4274  -2
  -4  -7   6 806.225 43.4274   1
  -3  -7   6 154.920 7.61919   1
   2  -9   6 694.723 40.0962  -2
  -2  -7   6 694.723 40.0962   1
  -1  -7   6 7.08900 1.56854   1
   0  -7   6 39.8216 14.6989  -2
   0  -7   6 39.8216 14.6989   1
  -1  -6   6 251.374 15.1313  -2
   1  -7   6 251.374 15.1313   1
  -2  -5   6 844.913 22.7184  -2
   2  -7   6 844.913 22.7184   1
  -3  -4   6 118.399 10.1274  -2
   3  -7   6 118.399 10.1274   1
  -4  -3   6 242.617 8.45529  -2
   4  -7   6 242.617 8.45529   1
  -5  -2   6 321.864 11.2473  -2
   5  -7   6 321.864 11.2473   1
  -6  -1   6 6.95651 5.67248  -2
   6  -7   6 6.95651 5.67248   1
  -7   0   6 973.529 26.5531  -2
   7  -7   6 973.529 26.5531   1
  -8   1   6 178.996 13.8026  -2
   8  -7   6 178.996 13.8026   1
  -9   2   6 140.885 21.2260  -2
   9  -7   6 140.885 21.2260   1
 -10   3   6 1410.28 71.1345  -2
  10  -7   6 1410.28 71.1345   1
 -11   4   6 887.500 56.9309  -2
  11  -7   6 887.500 56.9309   1
 -12   5   6 77.4327 26.8002  -2
  12  -7   6 77.4327 26.8002   1
 -14   7   6 19.5646 29.5468  -2
  14  -7   6 19.5646 29.5468   1
 -10  -6   6 1.48983 6.58990   1
  -9  -6   6 170.842 16.4336   1
  -8  -6   6 573.912 25.6260   1
  -7  -6   6 373.659 19.8463   1
  -6  -6   6 11.6407 3.16607   1
  -5  -6   6 279.399 10.4510   1
  -4  -6   6 788.835 18.4201   1
   3  -9   6 1197.27 54.1474  -2
  -3  -6   6 1197.27 54.1474   1
   2  -8   6 776.871 40.4540  -2
  -2  -6   6 776.871 40.4540   1
   1  -7   6 222.010 14.9626  -2
  -1  -6   6 222.010 14.9626   1
   0  -6   6 65.5630 10.2885  -2
   0  -6   6 65.5630 10.2885   1
  -1  -5   6 502.297 15.8928  -2
   1  -6   6 502.297 15.8928   1
  -2  -4   6 298.400 13.9616  -2
   2  -6   6 298.400 13.9616   1
  -3  -3   6 79.2323 8.31469  -2
   3  -6   6 79.2323 8.31469   1
  -4  -2   6 4639.84 77.5419  -2
   4  -6   6 4639.84 77.5419   1
  -5  -1   6 544.990 14.8778  -2
   5  -6   6 544.990 14.8778   1
  -6   0   6 56.4736 5.42640  -2
   6  -6   6 56.4736 5.42640   1
  -7   1   6 1461.44 43.0203  -2
   7  -6   6 1461.44 43.0203   1
  -8   2   6 355.130 19.0410  -2
   8  -6   6 355.130 19.0410   1
  -9   3   6 329.950 31.3500  -2
   9  -6   6 329.950 31.3500   1
 -10   4   6 649.692 46.8587  -2
  10  -6   6 649.692 46.8587   1
 -11   5   6 116.227 27.9228  -2
  11  -6   6 116.227 27.9228   1
 -12   6   6 -19.282 23.5206  -2
  12  -6   6 -19.282 23.5206   1
  14  -6   6 -3.0727 8.29115   1
 -11  -5   6 46.4066 8.78606   1
 -10  -5   6 4.64068 4.75659   1
  -9  -5   6 317.384 19.6775   1
  -8  -5   6 829.295 30.9018   1
  -7  -5   6 605.363 24.5244   1
  -6  -5   6 35.9230 5.82451   1
  -5  -5   6 42.5070 5.40687   1
   4  -9   6 1024.07 46.5768  -2
  -4  -5   6 1024.07 46.5768   1
   3  -8   6 199.103 20.4131  -2
  -3  -5   6 199.103 20.4131   1
   2  -7   6 787.142 20.7530  -2
  -2  -5   6 787.142 20.7530   1
   1  -6   6 584.192 21.1792  -2
  -1  -5   6 584.192 21.1792   1
   0  -5   6 1853.26 34.8647  -2
   0  -5   6 1853.26 34.8647   1
  -1  -4   6 1977.71 44.1319  -2
   1  -5   6 1977.71 44.1319   1
  -2  -3   6 28.2009 5.81986  -2
   2  -5   6 28.2009 5.81986   1
  -3  -2   6 1241.54 23.9239  -2
   3  -5   6 1241.54 23.9239   1
  -4  -1   6 3164.02 50.7102  -2
   4  -5   6 3164.02 50.7102   1
  -5   0   6 179.100 7.32215  -2
   5  -5   6 179.100 7.32215   1
  -6   1   6 220.359 13.3268  -2
   6  -5   6 220.359 13.3268   1
  -8   3   6 35.2693 14.9548  -2
   8  -5   6 35.2693 14.9548   1
  -9   4   6 65.6177 21.9687  -2
   9  -5   6 65.6177 21.9687   1
 -10   5   6 77.2455 25.9474  -2
  10  -5   6 77.2455 25.9474   1
  14  -5   6 -5.8690 8.58554   1
 -11  -4   6 44.9381 8.99324   1
 -10  -4   6 4.58859 4.99659   1
  -9  -4   6 300.770 18.3188   1
  -8  -4   6 897.385 26.8821   1
  -7  -4   6 459.040 15.8726   1
  -6  -4   6 1.77251 1.90409   1
   5  -9   6 52.2460 17.0409  -2
  -5  -4   6 52.2460 17.0409   1
   4  -8   6 69.0334 7.47154  -2
  -4  -4   6 69.0334 7.47154   1
   3  -7   6 124.704 6.63545  -2
  -3  -4   6 124.704 6.63545   1
   2  -6   6 339.836 9.02860  -2
  -2  -4   6 339.836 9.02860   1
   1  -5   6 1991.04 33.9959  -2
  -1  -4   6 1991.04 33.9959   1
   0  -4   6 3421.31 62.1262  -2
   0  -4   6 3421.31 62.1262   1
  -1  -3   6 3460.61 62.6016  -2
   1  -4   6 3460.61 62.6016   1
  -2  -2   6 140.794 6.21059  -2
   2  -4   6 140.794 6.21059   1
  -3  -1   6 5329.12 87.5940  -2
   3  -4   6 5329.12 87.5940   1
  -4   0   6 6081.78 91.2558  -2
   4  -4   6 6081.78 91.2558   1
  -5   1   6 413.026 14.5317  -2
   5  -4   6 413.026 14.5317   1
  -6   2   6 196.228 13.4485  -2
   6  -4   6 196.228 13.4485   1
  -7   3   6 55.9570 14.0894  -2
   7  -4   6 55.9570 14.0894   1
  -8   4   6 -9.1657 15.4332  -2
   8  -4   6 -9.1657 15.4332   1
  -9   5   6 35.4549 23.7872  -2
   9  -4   6 35.4549 23.7872   1
 -10   6   6 -21.901 23.7340  -2
  10  -4   6 -21.901 23.7340   1
  12  -4   6 15.7409 13.0687   1
  13  -4   6 -11.892 7.99074   1
 -12  -3   6 160.425 17.0986   1
 -11  -3   6 281.747 20.9328   1
 -10  -3   6 5.85127 4.35467   1
  -9  -3   6 242.232 16.4702   1
  -8  -3   6 488.958 18.3845   1
   7 -10   6 587.070 22.7556  -2
  -7  -3   6 587.070 22.7556   1
   6  -9   6 206.367 10.6063  -2
  -6  -3   6 206.367 10.6063   1
   5  -8   6 -3.7992 5.90655  -2
  -5  -3   6 -3.7992 5.90655   1
   4  -7   6 287.333 8.15565  -2
  -4  -3   6 287.333 8.15565   1
   3  -6   6 99.6359 4.93911  -2
  -3  -3   6 99.6359 4.93911   1
   2  -5   6 26.5712 4.01518  -2
  -2  -3   6 26.5712 4.01518   1
   1  -4   6 3207.23 49.6227  -2
  -1  -3   6 3207.23 49.6227   1
   0  -3   6 6297.34 106.166  -2
   0  -3   6 6297.34 106.166   1
  -1  -2   6 8803.42 145.061  -2
   1  -3   6 8803.42 145.061   1
  -2  -1   6 176.334 8.58977  -2
   2  -3   6 176.334 8.58977   1
  -3   0   6 141.614 6.31421  -2
   3  -3   6 141.614 6.31421   1
  -4   1   6 271.415 10.3375  -2
   4  -3   6 271.415 10.3375   1
  -5   2   6 295.060 13.5096  -2
   5  -3   6 295.060 13.5096   1
  -6   3   6 20.1106 8.77240  -2
   6  -3   6 20.1106 8.77240   1
  -7   4   6 615.891 21.2016  -2
   7  -3   6 615.891 21.2016   1
  -8   5   6 435.587 37.5158  -2
   8  -3   6 435.587 37.5158   1
  -9   6   6 314.062 38.0152  -2
   9  -3   6 314.062 38.0152   1
  10  -3   6 -8.1203 5.41761   1
  11  -3   6 37.4814 11.3798   1
  12  -3   6 313.897 40.4360   1
  13  -3   6 11.1921 9.85042   1
 -12  -2   6 184.450 28.4031   1
 -11  -2   6 13.1536 4.67941   1
 -10  -2   6 -1.6077 3.25840   1
   9 -11   6 0.47842 20.4811  -2
  -9  -2   6 0.47842 20.4811   1
   8 -10   6 25.0731 8.95649  -2
  -8  -2   6 25.0731 8.95649   1
   7  -9   6 297.173 11.0337  -2
  -7  -2   6 297.173 11.0337   1
   6  -8   6 22.8695 4.90757  -2
  -6  -2   6 22.8695 4.90757   1
   5  -7   6 330.407 8.65173  -2
  -5  -2   6 330.407 8.65173   1
   4  -6   6 4791.49 71.1176  -2
  -4  -2   6 4791.49 71.1176   1
   3  -5   6 1189.13 21.7779  -2
  -3  -2   6 1189.13 21.7779   1
   2  -4   6 128.415 4.93441  -2
  -2  -2   6 128.415 4.93441   1
   1  -3   6 8033.30 160.703  -2
  -1  -2   6 8033.30 160.703   1
   0  -2   6 9878.05 161.548  -2
   0  -2   6 9878.05 161.548   1
  -1  -1   6 4043.16 84.6977  -2
   1  -2   6 4043.16 84.6977   1
  -2   0   6 133.646 7.55366  -2
   2  -2   6 133.646 7.55366   1
  -3   1   6 504.498 17.0291  -2
   3  -2   6 504.498 17.0291   1
  -4   2   6 112.802 9.49869  -2
   4  -2   6 112.802 9.49869   1
  -5   3   6 218.181 16.2090  -2
   5  -2   6 218.181 16.2090   1
  -6   4   6 148.946 13.0898  -2
   6  -2   6 148.946 13.0898   1
  -7   5   6 1249.48 44.5807  -2
   7  -2   6 1249.48 44.5807   1
   8  -2   6 1245.08 45.1031   1
   9  -2   6 739.945 33.6986   1
  10  -2   6 2.44353 4.67464   1
  11  -2   6 65.1801 14.9836   1
  12  -2   6 182.049 19.9447   1
  13  -2   6 49.4029 13.7860   1
 -13  -1   6 0.90416 7.27328   1
 -12  -1   6 7.84789 7.38040   1
  10 -11   6 -19.702 18.3618  -2
 -10  -1   6 -19.702 18.3618   1
   9 -10   6 361.078 17.5334  -2
  -9  -1   6 361.078 17.5334   1
   8  -9   6 438.792 16.8012  -2
  -8  -1   6 438.792 16.8012   1
   7  -8   6 30.9944 5.54878  -2
  -7  -1   6 30.9944 5.54878   1
   6  -7   6 3.95463 5.19802  -2
  -6  -1   6 3.95463 5.19802   1
   5  -6   6 576.982 11.3218  -2
  -5  -1   6 576.982 11.3218   1
   4  -5   6 3339.55 59.5703  -2
  -4  -1   6 3339.55 59.5703   1
   3  -4   6 5371.21 79.9047  -2
  -3  -1   6 5371.21 79.9047   1
   2  -3   6 166.518 6.75169  -2
  -2  -1   6 166.518 6.75169   1
   1  -2   6 3628.72 63.2291  -2
  -1  -1   6 3628.72 63.2291   1
   0  -1   6 2537.49 45.6452  -2
   0  -1   6 2537.49 45.6452   1
  -1   0   6 1235.95 25.7573  -2
   1  -1   6 1235.95 25.7573   1
  -2   1   6 420.658 21.1282  -2
   2  -1   6 420.658 21.1282   1
  -3   2   6 108.280 8.60180  -2
   3  -1   6 108.280 8.60180   1
  -4   3   6 1041.64 27.7079  -2
   4  -1   6 1041.64 27.7079   1
  -5   4   6 297.616 26.0092  -2
   5  -1   6 297.616 26.0092   1
   6  -1   6 59.2340 6.44744   1
   7  -1   6 1228.64 44.6824   1
   8  -1   6 1432.20 73.2530   1
   9  -1   6 929.058 59.0695   1
  10  -1   6 31.4098 7.45822   1
  11  -1   6 26.0158 6.44389   1
  12  -1   6 111.330 20.0763   1
  13 -13   6 108.383 30.2807  -2
 -13   0   6 108.383 30.2807   1
  12 -12   6 12.0122 22.6452  -2
 -12   0   6 12.0122 22.6452   1
  11 -11   6 138.458 24.9547  -2
 -11   0   6 138.458 24.9547   1
  10 -10   6 291.313 15.8390  -2
 -10   0   6 291.313 15.8390   1
   9  -9   6 79.0739 8.67263  -2
  -9   0   6 79.0739 8.67263   1
   8  -8   6 127.676 8.44264  -2
  -8   0   6 127.676 8.44264   1
   7  -7   6 999.116 32.7776  -2
  -7   0   6 999.116 32.7776   1
   6  -6   6 60.6619 3.92473  -2
  -6   0   6 60.6619 3.92473   1
   5  -5   6 179.540 6.41274  -2
  -5   0   6 179.540 6.41274   1
   4  -4   6 6211.32 127.751  -2
  -4   0   6 6211.32 127.751   1
   3  -3   6 166.063 9.11042  -2
  -3   0   6 166.063 9.11042   1
   2  -2   6 110.819 3.81127  -2
  -2   0   6 110.819 3.81127   1
   1  -1   6 969.387 16.9944  -2
  -1   0   6 969.387 16.9944   1
   0   0   6 3439.41 100.858  -2
   0   0   6 3439.41 100.858   1
  -1   1   6 217.857 10.3091  -2
   1   0   6 217.857 10.3091   1
  -2   2   6 120.751 10.7689  -2
   2   0   6 120.751 10.7689   1
   3   0   6 532.971 13.0372   1
   4   0   6 931.968 19.4782   1
   5   0   6 196.338 9.23169   1
   6   0   6 7.44774 2.49174   1
   7   0   6 858.682 33.1851   1
   8   0   6 2530.97 109.061   1
   9   0   6 910.932 59.4868   1
  10   0   6 119.102 26.1160   1
  11   0   6 6.02103 8.97085   1
  12   0   6 7.65113 8.88580   1
  13 -12   6 18.6670 24.4721  -2
 -13   1   6 18.6670 24.4721   1
  11 -10   6 395.162 34.2333  -2
 -11   1   6 395.162 34.2333   1
  10  -9   6 621.287 20.6168  -2
 -10   1   6 621.287 20.6168   1
   9  -8   6 422.304 15.5039  -2
  -9   1   6 422.304 15.5039   1
   8  -7   6 162.632 12.8878  -2
  -8   1   6 162.632 12.8878   1
   7  -6   6 1424.30 26.3768  -2
  -7   1   6 1424.30 26.3768   1
   6  -5   6 234.125 7.38184  -2
  -6   1   6 234.125 7.38184   1
   5  -4   6 313.913 14.4380  -2
  -5   1   6 313.913 14.4380   1
   4  -3   6 306.153 22.0643  -2
  -4   1   6 306.153 22.0643   1
   3  -2   6 474.768 15.4247  -2
  -3   1   6 474.768 15.4247   1
   2  -1   6 301.824 10.1071  -2
  -2   1   6 301.824 10.1071   1
   1   0   6 217.750 9.38775  -2
  -1   1   6 217.750 9.38775   1
   0   1   6 88.8635 7.77266  -2
   0   1   6 88.8635 7.77266   1
  -1   2   6 142.310 13.0188  -2
   1   1   6 142.310 13.0188   1
   2   1   6 126.185 7.82451   1
   3   1   6 274.603 9.24963   1
   4   1   6 876.773 24.5444   1
   5   1   6 685.584 18.4891   1
   6   1   6 7.58078 3.80307   1
   7   1   6 755.381 31.6782   1
   8   1   6 816.730 34.4563   1
   9   1   6 214.449 18.5999   1
 -14   2   6 11.9119 7.85593   1
  13 -11   6 33.1474 22.4506  -2
 -13   2   6 33.1474 22.4506   1
  11  -9   6 835.282 25.0321  -2
 -11   2   6 835.282 25.0321   1
  10  -8   6 1589.68 38.3937  -2
 -10   2   6 1589.68 38.3937   1
   9  -7   6 191.158 9.02565  -2
  -9   2   6 191.158 9.02565   1
   8  -6   6 340.385 11.0699  -2
  -8   2   6 340.385 11.0699   1
   7  -5   6 659.752 19.1572  -2
  -7   2   6 659.752 19.1572   1
   6  -4   6 228.479 21.6588  -2
  -6   2   6 228.479 21.6588   1
   5  -3   6 279.969 22.4661  -2
  -5   2   6 279.969 22.4661   1
   4  -2   6 70.2617 14.7466  -2
  -4   2   6 70.2617 14.7466   1
   3  -1   6 108.561 6.43419  -2
  -3   2   6 108.561 6.43419   1
   2   0   6 120.950 8.21031  -2
  -2   2   6 120.950 8.21031   1
  -1   2   6 8.10765 1.72321   1
   0   2   6 729.798 16.3087   1
   1   2   6 85.7079 3.95084   1
   3   2   6 323.200 9.39589   1
   4   2   6 486.063 12.6969   1
   5   2   6 357.972 13.0332   1
   6   2   6 3.67566 2.77568   1
   7   2   6 -2.8387 5.15200   1
   8   2   6 78.6265 14.1501   1
   9   2   6 -0.5902 4.30342   1
  10   2   6 39.6695 8.14437   1
  11   2   6 -0.9794 9.14551   1
  14 -11   6 418.118 39.5387  -2
 -14   3   6 418.118 39.5387   1
  13 -10   6 202.806 28.3089  -2
 -13   3   6 202.806 28.3089   1
  12  -9   6 228.970 38.1503  -2
 -12   3   6 228.970 38.1503   1
  11  -8   6 952.339 40.2211  -2
 -11   3   6 952.339 40.2211   1
  10  -7   6 1550.64 37.1191  -2
 -10   3   6 1550.64 37.1191   1
   9  -6   6 459.414 21.6331  -2
  -9   3   6 459.414 21.6331   1
   8  -5   6 84.5556 5.66555  -2
  -8   3   6 84.5556 5.66555   1
   7  -4   6 53.4345 5.21044  -2
  -7   3   6 53.4345 5.21044   1
   6  -3   6 19.3392 3.91688  -2
  -6   3   6 19.3392 3.91688   1
   5  -2   6 175.274 7.69688  -2
  -5   3   6 175.274 7.69688   1
   4  -1   6 961.771 41.9852  -2
  -4   3   6 961.771 41.9852   1
  -3   3   6 829.429 18.4537   1
  -2   3   6 2061.02 40.7162   1
  -1   3   6 919.245 19.1820   1
   0   3   6 1055.04 22.0886   1
   1   3   6 966.504 18.9669   1
   2   3   6 372.429 9.80907   1
   3   3   6 120.690 6.34377   1
   4   3   6 75.0221 6.66377   1
   5   3   6 11.0431 3.26040   1
   6   3   6 -0.6776 3.94299   1
   7   3   6 47.1298 8.28412   1
   8   3   6 -5.9154 5.18963   1
   9   3   6 -2.1259 5.93910   1
  10   3   6 6.60172 5.78327   1
  14 -10   6 508.409 33.0011  -2
 -14   4   6 508.409 33.0011   1
  13  -9   6 77.4157 15.8429  -2
 -13   4   6 77.4157 15.8429   1
  12  -8   6 145.464 23.1198  -2
 -12   4   6 145.464 23.1198   1
  11  -7   6 1022.80 41.4564  -2
 -11   4   6 1022.80 41.4564   1
  10  -6   6 754.868 21.9593  -2
 -10   4   6 754.868 21.9593   1
   9  -5   6 167.280 15.4871  -2
  -9   4   6 167.280 15.4871   1
   8  -4   6 -1.8828 5.25570  -2
  -8   4   6 -1.8828 5.25570   1
   7  -3   6 600.287 18.3060  -2
  -7   4   6 600.287 18.3060   1
   6  -2   6 132.847 7.87448  -2
  -6   4   6 132.847 7.87448   1
   5  -1   6 310.577 35.1780  -2
  -5   4   6 310.577 35.1780   1
  -4   4   6 382.500 15.0715   1
  -3   4   6 1442.85 30.4920   1
  -2   4   6 2450.72 48.4501   1
  -1   4   6 209.316 8.00734   1
   0   4   6 10.2573 1.56715   1
   1   4   6 309.237 9.44676   1
   2   4   6 224.574 8.07951   1
   3   4   6 8.90615 2.35878   1
   4   4   6 85.5121 7.60362   1
   5   4   6 94.0412 9.43293   1
   6   4   6 1.50521 4.43716   1
   7   4   6 22.3586 5.95669   1
   8   4   6 -2.3925 4.61881   1
   9   4   6 2.88436 5.55113   1
  14  -9   6 636.201 35.3886  -2
 -14   5   6 636.201 35.3886   1
  13  -8   6 187.634 20.6878  -2
 -13   5   6 187.634 20.6878   1
  12  -7   6 96.9621 21.2556  -2
 -12   5   6 96.9621 21.2556   1
  11  -6   6 137.499 19.1247  -2
 -11   5   6 137.499 19.1247   1
  10  -5   6 127.698 9.43501  -2
 -10   5   6 127.698 9.43501   1
   9  -4   6 56.7725 8.07661  -2
  -9   5   6 56.7725 8.07661   1
   8  -3   6 405.916 14.4254  -2
  -8   5   6 405.916 14.4254   1
   7  -2   6 1053.17 36.4901  -2
  -7   5   6 1053.17 36.4901   1
  -6   5   6 647.156 21.8893   1
  -5   5   6 452.140 13.2308   1
  -4   5   6 339.631 11.3030   1
  -3   5   6 1760.56 37.2279   1
  -2   5   6 1495.32 29.1100   1
  -1   5   6 598.899 16.6165   1
   0   5   6 0.49260 1.75683   1
   1   5   6 7.28535 1.83377   1
   2   5   6 12.9829 2.37335   1
   3   5   6 -0.5244 1.99142   1
   4   5   6 2.51076 3.48236   1
   5   5   6 201.310 17.0621   1
   6   5   6 502.320 26.6504   1
   7   5   6 167.812 17.2001   1
   8   5   6 -4.2458 5.83598   1
  14  -8   6 153.675 20.4948  -2
 -14   6   6 153.675 20.4948   1
  13  -7   6 0.73290 29.7706  -2
 -13   6   6 0.73290 29.7706   1
  12  -6   6 1.27758 18.9337  -2
 -12   6   6 1.27758 18.9337   1
  11  -5   6 30.9610 9.17987  -2
 -11   6   6 30.9610 9.17987   1
  10  -4   6 5.99302 8.40789  -2
 -10   6   6 5.99302 8.40789   1
   9  -3   6 289.415 17.7966  -2
  -9   6   6 289.415 17.7966   1
  -8   6   6 47.4063 6.45545   1
  -7   6   6 1157.92 38.1640   1
  -6   6   6 1714.30 40.6257   1
  -5   6   6 55.6431 5.41327   1
  -4   6   6 5.80199 1.92640   1
  -3   6   6 1337.83 31.1315   1
  -2   6   6 750.410 18.3495   1
  -1   6   6 441.660 12.9021   1
   0   6   6 117.883 6.65936   1
   1   6   6 151.131 8.87535   1
   2   6   6 165.415 9.09589   1
   3   6   6 4.25278 2.60832   1
   4   6   6 -2.6845 3.67331   1
   5   6   6 305.329 20.7724   1
   6   6   6 315.605 21.9773   1
   7   6   6 127.085 17.0481   1
  14  -7   6 36.1767 19.2282  -2
 -14   7   6 36.1767 19.2282   1
  13  -6   6 -27.038 31.6036  -2
 -13   7   6 -27.038 31.6036   1
  12  -5   6 -8.3468 9.22578  -2
 -12   7   6 -8.3468 9.22578   1
  11  -4   6 20.3864 9.15744  -2
 -11   7   6 20.3864 9.15744   1
 -10   7   6 125.724 9.58845   1
  -9   7   6 177.572 10.6690   1
  -8   7   6 46.1516 6.15378   1
  -7   7   6 378.537 13.7378   1
  -6   7   6 986.777 24.9427   1
  -5   7   6 574.682 16.7620   1
  -4   7   6 2.59722 2.17535   1
  -3   7   6 68.2101 6.39484   1
  -2   7   6 80.6018 4.89181   1
  -1   7   6 136.106 7.27181   1
   0   7   6 131.595 8.62227   1
   1   7   6 333.497 13.6142   1
   2   7   6 400.320 15.6942   1
   3   7   6 233.334 13.5664   1
   4   7   6 103.229 14.5377   1
   5   7   6 635.791 30.4827   1
   6   7   6 573.757 30.0620   1
  14  -6   6 10.4644 35.8180  -2
 -14   8   6 10.4644 35.8180   1
  13  -5   6 8.43046 12.6072  -2
 -13   8   6 8.43046 12.6072   1
  12  -4   6 98.1708 22.0550  -2
 -12   8   6 98.1708 22.0550   1
 -11   8   6 11.5748 3.41888   1
 -10   8   6 266.035 11.4810   1
  -9   8   6 148.132 8.74162   1
  -8   8   6 94.5941 7.67424   1
  -7   8   6 432.218 15.6359   1
  -6   8   6 724.636 21.0361   1
  -5   8   6 58.8716 6.69143   1
  -4   8   6 450.331 13.3448   1
  -3   8   6 1.27643 1.63798   1
  -2   8   6 3.70461 1.72373   1
  -1   8   6 27.7902 4.04558   1
   0   8   6 121.326 9.15366   1
   1   8   6 525.430 18.2601   1
   2   8   6 625.422 25.5761   1
   3   8   6 -2.4085 5.83008   1
   4   8   6 -2.7153 4.22627   1
   5   8   6 275.073 21.1645   1
 -13   9   6 256.430 14.7561   1
 -12   9   6 50.1887 7.77723   1
 -11   9   6 41.9837 5.37205   1
 -10   9   6 327.157 12.9150   1
  -9   9   6 45.5609 6.24719   1
  -8   9   6 76.3913 7.38987   1
  -7   9   6 1.91979 2.59962   1
  -6   9   6 106.820 8.73213   1
  -5   9   6 81.7487 7.53346   1
  -4   9   6 135.060 7.74145   1
  -3   9   6 15.6590 2.82953   1
  -2   9   6 53.7868 6.61622   1
  -1   9   6 20.6244 4.61012   1
   0   9   6 109.643 9.58267   1
   1   9   6 343.256 15.5317   1
   3   9   6 129.385 21.3572   1
   4   9   6 8.79661 6.46194   1
 -13  10   6 177.013 11.8219   1
 -12  10   6 -1.6059 3.80343   1
 -11  10   6 -2.2998 2.83753   1
 -10  10   6 18.6074 3.51726   1
  -9  10   6 -0.4871 2.33058   1
  -8  10   6 0.09318 2.16767   1
  -7  10   6 74.4065 8.48223   1
  -6  10   6 3.13539 2.86019   1
  -5  10   6 168.052 8.98719   1
  -4  10   6 11.3350 3.36021   1
  -3  10   6 1.41116 3.61658   1
  -2  10   6 123.256 8.17517   1
  -1  10   6 67.9477 10.5891   1
   0  10   6 45.8520 7.25781   1
   1  10   6 168.706 22.1247   1
   2  10   6 200.061 25.5071   1
   3  10   6 22.9674 10.3749   1
 -12  11   6 19.3758 4.03233   1
 -11  11   6 8.05086 3.28519   1
 -10  11   6 -0.9740 2.55449   1
  -9  11   6 18.4396 3.52191   1
  -8  11   6 21.0192 3.30999   1
  -7  11   6 7.55135 3.66340   1
  -6  11   6 104.193 8.79470   1
  -5  11   6 83.0772 8.79590   1
  -4  11   6 146.290 10.1947   1
  -3  11   6 10.4651 3.86839   1
  -2  11   6 74.6382 8.63853   1
  -1  11   6 17.0903 10.5640   1
   0  11   6 7.63336 6.42522   1
   1  11   6 72.8714 19.0947   1
  12   0   6 -27.680 21.0000  -2
 -11  12   6 -27.680 21.0000   1
 -10  12   6 32.6413 4.41227   1
  -9  12   6 134.917 10.6537   1
  -8  12   6 49.8167 5.60801   1
  -7  12   6 2.66254 2.61765   1
  -6  12   6 132.927 10.5441   1
  -5  12   6 129.771 10.7735   1
  -4  12   6 50.3375 7.77539   1
  -2  12   6 1.72731 6.03844   1
  -1  12   6 -2.0571 5.02335   1
  -8  13   6 116.972 10.1982   1
  -7  13   6 3.29825 2.73828   1
  -6  13   6 26.0443 4.37113   1
  -5  13   6 130.177 11.6909   1
  -4  13   6 6.95717 6.20389   1
   3 -16   7 -2.0980 4.77390   1
   4 -16   7 16.9522 6.11468   1
   5 -16   7 28.6844 6.93356   1
   6 -16   7 -1.1837 4.59866   1
   7 -16   7 51.8962 9.45437   1
  -9  -7   7 350.818 42.3429  -2
   8 -16   7 350.818 42.3429   1
 -10  -6   7 276.946 40.8653  -2
   9 -16   7 276.946 40.8653   1
   1 -15   7 3.73818 5.12761   1
   2 -15   7 26.4484 6.79087   1
   3 -15   7 124.041 15.1636   1
   4 -15   7 291.445 20.6075   1
   5 -15   7 155.502 16.9964   1
   6 -15   7 4.00213 5.05653   1
   7 -15   7 233.059 25.4504   1
   8 -15   7 255.021 20.2151   1
   9 -15   7 173.884 17.8881   1
 -11  -4   7 -14.534 28.2983  -2
  10 -15   7 -14.534 28.2983   1
  11 -15   7 30.7768 7.78278   1
  -1 -14   7 13.0344 5.61889   1
   0 -14   7 56.9658 8.89579   1
   1 -14   7 3.74413 4.41163   1
   2 -14   7 2.87449 4.80551   1
   3 -14   7 66.8980 19.4538   1
   4 -14   7 359.193 22.2291   1
   5 -14   7 348.922 21.4520   1
   6 -14   7 60.8050 18.4184   1
   7 -14   7 126.098 14.9825   1
   8 -14   7 224.762 27.3741   1
   9 -14   7 125.804 11.8979   1
  10 -14   7 0.56709 2.87654   1
  11 -14   7 -0.0165 4.94796   1
  12 -14   7 3.57310 5.38220   1
  -3 -13   7 63.0724 7.32190   1
  -2 -13   7 15.4750 5.57821   1
  -1 -13   7 92.5177 13.6065   1
   0 -13   7 136.510 15.4407   1
   1 -13   7 157.520 15.1373   1
   2 -13   7 18.3113 5.05544   1
   3 -13   7 233.367 17.1628   1
   4 -13   7 778.705 31.3075   1
   5 -13   7 760.955 31.2020   1
   6 -13   7 62.4174 8.61519   1
   7 -13   7 13.1921 4.76949   1
   8 -13   7 69.2691 7.90490   1
   9 -13   7 27.8224 6.88564   1
  10 -13   7 5.25479 3.09279   1
  11 -13   7 17.0917 5.62664   1
  12 -13   7 181.391 20.2117   1
 -13   0   7 337.890 28.2827  -2
  13 -13   7 337.890 28.2827   1
  -4 -12   7 -1.3644 3.11817   1
  -3 -12   7 2.03433 2.87597   1
  -2 -12   7 0.77929 2.26007   1
  -1 -12   7 11.8472 4.87975   1
   0 -12   7 261.588 17.5751   1
   1 -12   7 601.239 26.1339   1
   2 -12   7 236.660 16.6088   1
   3 -12   7 9.36835 4.19434   1
   4 -12   7 294.121 18.6088   1
   5 -12   7 281.868 18.5635   1
   6 -12   7 42.0319 7.92394   1
   7 -12   7 2.81804 3.55927   1
   8 -12   7 6.83375 2.49251   1
   9 -12   7 3.46693 2.77588   1
  10 -12   7 -2.3554 3.39840   1
 -11  -1   7 329.947 34.7825  -2
  11 -12   7 329.947 34.7825   1
 -12   0   7 733.642 37.0722  -2
  12 -12   7 733.642 37.0722   1
 -13   1   7 626.717 35.7986  -2
  13 -12   7 626.717 35.7986   1
  -5 -11   7 0.73660 3.38070   1
  -4 -11   7 -3.2685 2.73892   1
  -3 -11   7 58.0665 8.22672   1
  -2 -11   7 106.664 8.82856   1
  -1 -11   7 20.0409 5.00513   1
   0 -11   7 504.084 22.8666   1
   1 -11   7 276.804 16.9622   1
   2 -11   7 87.2448 11.1779   1
   3 -11   7 126.765 12.7181   1
   4 -11   7 410.526 19.6827   1
   5 -11   7 112.671 6.64295   1
   6 -11   7 8.57414 1.66504   1
   7 -11   7 10.4520 2.33464   1
   8 -11   7 283.930 12.5063   1
  -9  -2   7 495.257 37.6687  -2
   9 -11   7 495.257 37.6687   1
 -10  -1   7 22.4499 14.4927  -2
  10 -11   7 22.4499 14.4927   1
 -11   0   7 138.138 18.7657  -2
  11 -11   7 138.138 18.7657   1
 -12   1   7 558.901 45.4354  -2
  12 -11   7 558.901 45.4354   1
 -13   2   7 516.482 33.2115  -2
  13 -11   7 516.482 33.2115   1
  -7 -10   7 23.5766 9.01723   1
  -6 -10   7 132.003 13.7966   1
  -5 -10   7 76.9567 10.1188   1
  -4 -10   7 28.2070 4.39412   1
  -3 -10   7 347.991 14.6087   1
  -2 -10   7 131.313 9.26836   1
  -1 -10   7 1.43762 1.76044   1
   0 -10   7 79.1111 5.26650   1
   1 -10   7 433.567 20.3117   1
   2 -10   7 30.4585 5.69341   1
   3 -10   7 43.7546 7.62666   1
   4 -10   7 3.57512 1.47240   1
   5 -10   7 17.0970 3.87684   1
  -6  -4   7 436.635 24.4222  -2
   6 -10   7 436.635 24.4222   1
  -7  -3   7 411.301 21.9039  -2
   7 -10   7 411.301 21.9039   1
  -8  -2   7 1040.30 25.7240  -2
   8 -10   7 1040.30 25.7240   1
  -9  -1   7 1183.94 39.7459  -2
   9 -10   7 1183.94 39.7459   1
 -10   0   7 195.222 19.4712  -2
  10 -10   7 195.222 19.4712   1
 -11   1   7 59.9716 15.6587  -2
  11 -10   7 59.9716 15.6587   1
 -12   2   7 438.481 39.9238  -2
  12 -10   7 438.481 39.9238   1
 -13   3   7 389.513 29.0247  -2
  13 -10   7 389.513 29.0247   1
 -14   4   7 -8.1715 14.3845  -2
  14 -10   7 -8.1715 14.3845   1
  -7  -9   7 167.772 16.3740   1
  -6  -9   7 273.103 14.9610   1
  -5  -9   7 116.964 10.4876   1
  -4  -9   7 17.8176 3.49727   1
  -3  -9   7 359.649 14.4899   1
  -2  -9   7 372.803 14.0471   1
  -1  -9   7 5.02139 1.74982   1
   0  -9   7 369.825 12.1721   1
   1  -9   7 31.4892 3.61107   1
  -2  -7   7 98.3311 20.6294  -2
   2  -9   7 98.3311 20.6294   1
  -3  -6   7 353.488 20.8490  -2
   3  -9   7 353.488 20.8490   1
  -4  -5   7 19.3378 15.7781  -2
   4  -9   7 19.3378 15.7781   1
  -5  -4   7 659.272 39.7100  -2
   5  -9   7 659.272 39.7100   1
  -6  -3   7 352.111 12.7272  -2
   6  -9   7 352.111 12.7272   1
  -7  -2   7 29.0086 7.35728  -2
   7  -9   7 29.0086 7.35728   1
  -8  -1   7 493.375 25.5773  -2
   8  -9   7 493.375 25.5773   1
  -9   0   7 1304.66 35.1040  -2
   9  -9   7 1304.66 35.1040   1
 -10   1   7 433.802 26.7989  -2
  10  -9   7 433.802 26.7989   1
 -11   2   7 42.5131 14.5474  -2
  11  -9   7 42.5131 14.5474   1
 -12   3   7 137.832 25.1538  -2
  12  -9   7 137.832 25.1538   1
  -8  -8   7 -1.0316 3.94248   1
  -7  -8   7 340.607 20.3198   1
  -6  -8   7 597.136 21.0073   1
  -5  -8   7 231.484 13.6556   1
  -4  -8   7 1.00978 2.38295   1
  -3  -8   7 18.0994 3.14692   1
   2 -10   7 36.8868 17.6370  -2
  -2  -8   7 36.8868 17.6370   1
   1  -9   7 29.8657 17.9345  -2
  -1  -8   7 29.8657 17.9345   1
   0  -8   7 171.939 21.5382  -2
   0  -8   7 171.939 21.5382   1
  -1  -7   7 424.745 30.5112  -2
   1  -8   7 424.745 30.5112   1
  -2  -6   7 1262.12 56.0181  -2
   2  -8   7 1262.12 56.0181   1
   3  -8   7 112.314 11.6463   1
  -4  -4   7 519.627 25.6833  -2
   4  -8   7 519.627 25.6833   1
  -5  -3   7 888.511 24.6150  -2
   5  -8   7 888.511 24.6150   1
  -6  -2   7 1182.76 26.7229  -2
   6  -8   7 1182.76 26.7229   1
  -7  -1   7 82.6639 8.82803  -2
   7  -8   7 82.6639 8.82803   1
  -8   0   7 286.596 17.3490  -2
   8  -8   7 286.596 17.3490   1
  -9   1   7 257.557 19.1745  -2
   9  -8   7 257.557 19.1745   1
 -10   2   7 18.4799 11.4893  -2
  10  -8   7 18.4799 11.4893   1
 -12   4   7 -20.735 17.4866  -2
  12  -8   7 -20.735 17.4866   1
  -9  -7   7 201.679 17.8973   1
  -8  -7   7 0.40612 4.60028   1
  -7  -7   7 231.088 16.1594   1
  -6  -7   7 559.839 19.4538   1
  -5  -7   7 236.398 12.5197   1
   4 -11   7 348.689 32.1008  -2
  -4  -7   7 348.689 32.1008   1
   3 -10   7 80.4234 19.9930  -2
  -3  -7   7 80.4234 19.9930   1
   2  -9   7 149.886 20.5558  -2
  -2  -7   7 149.886 20.5558   1
   1  -8   7 464.252 31.7884  -2
  -1  -7   7 464.252 31.7884   1
   0  -7   7 10.4859 12.7453  -2
   0  -7   7 10.4859 12.7453   1
  -1  -6   7 1170.31 28.4671  -2
   1  -7   7 1170.31 28.4671   1
  -2  -5   7 4349.55 100.805  -2
   2  -7   7 4349.55 100.805   1
  -3  -4   7 2090.21 48.4389  -2
   3  -7   7 2090.21 48.4389   1
  -4  -3   7 1251.71 31.8364  -2
   4  -7   7 1251.71 31.8364   1
  -5  -2   7 1635.16 33.0024  -2
   5  -7   7 1635.16 33.0024   1
  -6  -1   7 526.657 21.0727  -2
   6  -7   7 526.657 21.0727   1
  -7   0   7 10.0060 5.61295  -2
   7  -7   7 10.0060 5.61295   1
  -8   1   7 196.647 12.2583  -2
   8  -7   7 196.647 12.2583   1
  -9   2   7 -5.5407 13.0484  -2
   9  -7   7 -5.5407 13.0484   1
 -10   3   7 -18.974 16.8641  -2
  10  -7   7 -18.974 16.8641   1
 -11   4   7 -13.698 18.0830  -2
  11  -7   7 -13.698 18.0830   1
 -12   5   7 2.01889 22.3375  -2
  12  -7   7 2.01889 22.3375   1
  14  -7   7 -0.4525 8.61004   1
 -10  -6   7 252.590 21.0136   1
  -9  -6   7 216.338 17.1908   1
  -8  -6   7 15.0269 4.63307   1
  -7  -6   7 217.509 15.2890   1
  -6  -6   7 78.7189 10.2729   1
  -5  -6   7 26.2291 3.86203   1
   4 -10   7 131.184 20.1400  -2
  -4  -6   7 131.184 20.1400   1
   3  -9   7 444.589 21.0951  -2
  -3  -6   7 444.589 21.0951   1
  -2  -6   7 983.440 18.7935   1
   1  -7   7 1114.73 34.6717  -2
  -1  -6   7 1114.73 34.6717   1
   0  -6   7 247.194 11.3470  -2
   0  -6   7 247.194 11.3470   1
  -1  -5   7 2886.78 51.5479  -2
   1  -6   7 2886.78 51.5479   1
  -2  -4   7 4918.26 97.1580  -2
   2  -6   7 4918.26 97.1580   1
  -3  -3   7 839.449 20.2543  -2
   3  -6   7 839.449 20.2543   1
  -4  -2   7 212.015 9.31585  -2
   4  -6   7 212.015 9.31585   1
  -5  -1   7 11.6951 4.95893  -2
   5  -6   7 11.6951 4.95893   1
  -6   0   7 16.2060 4.43255  -2
   6  -6   7 16.2060 4.43255   1
  -9   3   7 47.2563 18.1457  -2
   9  -6   7 47.2563 18.1457   1
 -10   4   7 237.175 31.8501  -2
  10  -6   7 237.175 31.8501   1
 -11   5   7 38.2425 24.0585  -2
  11  -6   7 38.2425 24.0585   1
 -13   7   7 107.169 35.4643  -2
  13  -6   7 107.169 35.4643   1
  14  -6   7 34.5257 13.2114   1
 -11  -5   7 28.8578 6.71771   1
 -10  -5   7 271.483 19.0240   1
  -9  -5   7 192.958 15.9371   1
  -8  -5   7 2.63895 3.45745   1
  -7  -5   7 6.55832 3.02564   1
  -6  -5   7 7.92125 2.34602   1
  -5  -5   7 1.02380 1.78612   1
   4  -9   7 51.3749 8.19279  -2
  -4  -5   7 51.3749 8.19279   1
   3  -8   7 1381.80 36.7984  -2
  -3  -5   7 1381.80 36.7984   1
   2  -7   7 4625.71 104.393  -2
  -2  -5   7 4625.71 104.393   1
   1  -6   7 2803.32 49.6477  -2
  -1  -5   7 2803.32 49.6477   1
   0  -5   7 2.18080 5.75239  -2
   0  -5   7 2.18080 5.75239   1
  -1  -4   7 2036.32 41.7871  -2
   1  -5   7 2036.32 41.7871   1
  -2  -3   7 2524.36 42.3917  -2
   2  -5   7 2524.36 42.3917   1
  -3  -2   7 955.058 23.5454  -2
   3  -5   7 955.058 23.5454   1
  -4  -1   7 144.405 7.84540  -2
   4  -5   7 144.405 7.84540   1
  -5   0   7 147.306 7.11047  -2
   5  -5   7 147.306 7.11047   1
  -6   1   7 104.987 8.26352  -2
   6  -5   7 104.987 8.26352   1
  -7   2   7 -15.873 10.6661  -2
   7  -5   7 -15.873 10.6661   1
  -8   3   7 12.2509 15.2192  -2
   8  -5   7 12.2509 15.2192   1
  -9   4   7 658.290 47.1384  -2
   9  -5   7 658.290 47.1384   1
 -10   5   7 691.454 52.4227  -2
  10  -5   7 691.454 52.4227   1
 -11   6   7 -18.976 22.8323  -2
  11  -5   7 -18.976 22.8323   1
  13  -5   7 177.168 33.9892   1
 -11  -4   7 4.31290 4.37408   1
 -10  -4   7 28.7273 6.28268   1
  -9  -4   7 14.0406 4.35759   1
  -8  -4   7 2.19867 3.18400   1
  -7  -4   7 0.19450 2.14823   1
   6 -10   7 499.957 20.0371  -2
  -6  -4   7 499.957 20.0371   1
   5  -9   7 556.072 17.3688  -2
  -5  -4   7 556.072 17.3688   1
   4  -8   7 689.128 15.2632  -2
  -4  -4   7 689.128 15.2632   1
   3  -7   7 2221.13 33.6952  -2
  -3  -4   7 2221.13 33.6952   1
   2  -6   7 5018.05 76.1854  -2
  -2  -4   7 5018.05 76.1854   1
   1  -5   7 1902.23 33.0423  -2
  -1  -4   7 1902.23 33.0423   1
   0  -4   7 -2.0303 5.01251  -2
   0  -4   7 -2.0303 5.01251   1
  -1  -3   7 1348.91 29.2768  -2
   1  -4   7 1348.91 29.2768   1
  -2  -2   7 300.372 9.51773  -2
   2  -4   7 300.372 9.51773   1
  -3  -1   7 58.5245 4.92862  -2
   3  -4   7 58.5245 4.92862   1
  -4   0   7 529.956 15.3542  -2
   4  -4   7 529.956 15.3542   1
  -5   1   7 761.740 19.9774  -2
   5  -4   7 761.740 19.9774   1
  -6   2   7 1580.11 49.6496  -2
   6  -4   7 1580.11 49.6496   1
  -7   3   7 426.340 22.1321  -2
   7  -4   7 426.340 22.1321   1
  -8   4   7 550.457 40.1341  -2
   8  -4   7 550.457 40.1341   1
  -9   5   7 857.574 55.6365  -2
   9  -4   7 857.574 55.6365   1
 -10   6   7 361.288 42.2616  -2
  10  -4   7 361.288 42.2616   1
  11  -4   7 206.538 32.6995   1
  12  -4   7 -3.6683 6.87975   1
  13  -4   7 33.3277 12.9245   1
 -12  -3   7 -1.8161 4.34300   1
 -11  -3   7 30.0598 6.22831   1
 -10  -3   7 -2.3441 3.15096   1
  -9  -3   7 5.21169 5.04359   1
   8 -11   7 205.149 16.2544  -2
  -8  -3   7 205.149 16.2544   1
   7 -10   7 354.656 13.5873  -2
  -7  -3   7 354.656 13.5873   1
   6  -9   7 386.604 12.6305  -2
  -6  -3   7 386.604 12.6305   1
   5  -8   7 845.462 18.6835  -2
  -5  -3   7 845.462 18.6835   1
   4  -7   7 1289.11 23.9364  -2
  -4  -3   7 1289.11 23.9364   1
   3  -6   7 894.053 18.4326  -2
  -3  -3   7 894.053 18.4326   1
   2  -5   7 2483.02 40.5032  -2
  -2  -3   7 2483.02 40.5032   1
   1  -4   7 1435.16 30.6516  -2
  -1  -3   7 1435.16 30.6516   1
   0  -3   7 45.3694 4.68540  -2
   0  -3   7 45.3694 4.68540   1
  -1  -2   7 38.7793 4.29518  -2
   1  -3   7 38.7793 4.29518   1
  -2  -1   7 123.378 7.12084  -2
   2  -3   7 123.378 7.12084   1
  -3   0   7 137.873 7.76013  -2
   3  -3   7 137.873 7.76013   1
  -4   1   7 530.839 18.3572  -2
   4  -3   7 530.839 18.3572   1
  -5   2   7 1724.38 41.6522  -2
   5  -3   7 1724.38 41.6522   1
  -6   3   7 997.265 35.7454  -2
   6  -3   7 997.265 35.7454   1
  -7   4   7 740.504 31.9968  -2
   7  -3   7 740.504 31.9968   1
  -8   5   7 353.309 21.9139  -2
   8  -3   7 353.309 21.9139   1
   9  -3   7 615.805 29.5025   1
  10  -3   7 482.084 44.5464   1
  11  -3   7 93.6488 26.5588   1
  12  -3   7 -7.7578 6.11910   1
  13  -3   7 -3.2942 8.61391   1
 -12  -2   7 30.0443 9.58214   1
 -11  -2   7 -6.8284 7.06758   1
  10 -12   7 -23.079 18.7138  -2
 -10  -2   7 -23.079 18.7138   1
   9 -11   7 398.321 19.9633  -2
  -9  -2   7 398.321 19.9633   1
   8 -10   7 1118.00 33.6500  -2
  -8  -2   7 1118.00 33.6500   1
   7  -9   7 27.4493 7.38428  -2
  -7  -2   7 27.4493 7.38428   1
   6  -8   7 1086.15 22.6136  -2
  -6  -2   7 1086.15 22.6136   1
   5  -7   7 1762.63 31.6702  -2
  -5  -2   7 1762.63 31.6702   1
   4  -6   7 220.523 8.48844  -2
  -4  -2   7 220.523 8.48844   1
   3  -5   7 823.681 16.3869  -2
  -3  -2   7 823.681 16.3869   1
   2  -4   7 297.598 8.33506  -2
  -2  -2   7 297.598 8.33506   1
   1  -3   7 43.4870 4.45174  -2
  -1  -2   7 43.4870 4.45174   1
   0  -2   7 11.8169 3.80515  -2
   0  -2   7 11.8169 3.80515   1
  -1  -1   7 79.3425 7.18204  -2
   1  -2   7 79.3425 7.18204   1
  -2   0   7 168.076 8.46628  -2
   2  -2   7 168.076 8.46628   1
  -3   1   7 324.320 12.6683  -2
   3  -2   7 324.320 12.6683   1
  -4   2   7 2074.66 60.7796  -2
   4  -2   7 2074.66 60.7796   1
  -5   3   7 2361.35 68.7331  -2
   5  -2   7 2361.35 68.7331   1
  -6   4   7 1615.80 53.5199  -2
   6  -2   7 1615.80 53.5199   1
  -7   5   7 895.955 53.1437  -2
   7  -2   7 895.955 53.1437   1
   8  -2   7 -1.6017 3.63684   1
   9  -2   7 127.039 16.1769   1
  10  -2   7 84.1043 19.0558   1
  11  -2   7 26.0070 7.10200   1
  12  -2   7 -5.5131 5.22564   1
 -13  -1   7 94.8527 26.1738   1
  12 -13   7 266.162 35.0056  -2
 -12  -1   7 266.162 35.0056   1
  10 -11   7 -6.3864 16.9757  -2
 -10  -1   7 -6.3864 16.9757   1
   9 -10   7 1148.77 34.3792  -2
  -9  -1   7 1148.77 34.3792   1
   8  -9   7 406.640 14.8635  -2
  -8  -1   7 406.640 14.8635   1
   7  -8   7 89.5312 6.78155  -2
  -7  -1   7 89.5312 6.78155   1
   6  -7   7 530.894 14.8412  -2
  -6  -1   7 530.894 14.8412   1
   5  -6   7 14.1580 3.03440  -2
  -5  -1   7 14.1580 3.03440   1
   4  -5   7 131.777 4.87521  -2
  -4  -1   7 131.777 4.87521   1
   3  -4   7 61.3087 3.24569  -2
  -3  -1   7 61.3087 3.24569   1
   2  -3   7 117.459 7.97249  -2
  -2  -1   7 117.459 7.97249   1
   1  -2   7 88.7438 5.05511  -2
  -1  -1   7 88.7438 5.05511   1
   0  -1   7 10.7051 3.36291  -2
   0  -1   7 10.7051 3.36291   1
  -1   0   7 1175.03 30.2931  -2
   1  -1   7 1175.03 30.2931   1
  -2   1   7 751.244 32.3819  -2
   2  -1   7 751.244 32.3819   1
  -3   2   7 973.869 32.3404  -2
   3  -1   7 973.869 32.3404   1
   4  -1   7 42.2654 8.34442   1
   5  -1   7 752.525 20.8168   1
   6  -1   7 1475.92 33.1385   1
   7  -1   7 261.246 20.0697   1
   8  -1   7 27.0915 6.27878   1
   9  -1   7 31.1517 7.47562   1
  10  -1   7 -9.0522 5.82960   1
  11  -1   7 1.33507 7.80943   1
  12  -1   7 -1.1283 8.24548   1
  13 -13   7 376.918 40.3905  -2
 -13   0   7 376.918 40.3905   1
  12 -12   7 777.990 51.8352  -2
 -12   0   7 777.990 51.8352   1
  11 -11   7 108.172 22.6734  -2
 -11   0   7 108.172 22.6734   1
  10 -10   7 236.669 14.3509  -2
 -10   0   7 236.669 14.3509   1
   9  -9   7 1298.27 30.8949  -2
  -9   0   7 1298.27 30.8949   1
   8  -8   7 335.355 16.2081  -2
  -8   0   7 335.355 16.2081   1
   7  -7   7 6.51274 3.65794  -2
  -7   0   7 6.51274 3.65794   1
   6  -6   7 7.67650 6.10149  -2
  -6   0   7 7.67650 6.10149   1
   5  -5   7 122.868 9.12844  -2
  -5   0   7 122.868 9.12844   1
   4  -4   7 500.936 18.3060  -2
  -4   0   7 500.936 18.3060   1
   3  -3   7 175.614 17.4557  -2
  -3   0   7 175.614 17.4557   1
   2  -2   7 171.104 5.23520  -2
  -2   0   7 171.104 5.23520   1
   1  -1   7 1252.75 26.8237  -2
  -1   0   7 1252.75 26.8237   1
   0   0   7 825.525 23.2811  -2
   0   0   7 825.525 23.2811   1
  -1   1   7 1833.30 43.1131  -2
   1   0   7 1833.30 43.1131   1
  -2   2   7 920.476 36.9072  -2
   2   0   7 920.476 36.9072   1
   3   0   7 1364.78 25.3703   1
   4   0   7 86.0458 6.86332   1
   5   0   7 193.887 8.88905   1
   6   0   7 192.478 12.8326   1
   7   0   7 488.378 28.3699   1
   8   0   7 7.52157 5.15408   1
   9   0   7 14.1279 5.95308   1
  10   0   7 27.8876 10.1625   1
  11   0   7 19.5787 7.64976   1
  13 -12   7 820.756 55.1973  -2
 -13   1   7 820.756 55.1973   1
  12 -11   7 626.019 45.0806  -2
 -12   1   7 626.019 45.0806   1
  11 -10   7 68.4583 19.2154  -2
 -11   1   7 68.4583 19.2154   1
  10  -9   7 337.273 13.7865  -2
 -10   1   7 337.273 13.7865   1
   9  -8   7 267.550 19.9926  -2
  -9   1   7 267.550 19.9926   1
   8  -7   7 167.411 6.96470  -2
  -8   1   7 167.411 6.96470   1
   7  -6   7 -4.0584 6.56338  -2
  -7   1   7 -4.0584 6.56338   1
   6  -5   7 90.0411 9.26411  -2
  -6   1   7 90.0411 9.26411   1
   5  -4   7 674.150 22.5191  -2
  -5   1   7 674.150 22.5191   1
   4  -3   7 626.656 34.7084  -2
  -4   1   7 626.656 34.7084   1
   3  -2   7 299.937 11.7462  -2
  -3   1   7 299.937 11.7462   1
   2  -1   7 686.501 18.9718  -2
  -2   1   7 686.501 18.9718   1
   1   0   7 2298.66 76.0757  -2
  -1   1   7 2298.66 76.0757   1
   0   1   7 312.800 11.6958   1
   1   1   7 58.9952 4.81634   1
   2   1   7 635.547 14.8552   1
   3   1   7 518.541 13.6809   1
   4   1   7 2.62498 2.00792   1
   5   1   7 87.3259 9.31024   1
   6   1   7 219.338 16.9126   1
   7   1   7 518.229 26.6284   1
   8   1   7 6.04465 4.46401   1
   9   1   7 1.09594 6.23593   1
  10   1   7 19.1232 9.63225   1
  11   1   7 31.5496 11.4728   1
  13 -11   7 492.342 40.5433  -2
 -13   2   7 492.342 40.5433   1
  11  -9   7 39.0773 14.3942  -2
 -11   2   7 39.0773 14.3942   1
  10  -8   7 17.9998 5.32543  -2
 -10   2   7 17.9998 5.32543   1
   9  -7   7 -5.7931 6.95214  -2
  -9   2   7 -5.7931 6.95214   1
   8  -6   7 72.7240 4.76829  -2
  -8   2   7 72.7240 4.76829   1
   6  -4   7 1466.95 58.7777  -2
  -6   2   7 1466.95 58.7777   1
   5  -3   7 1933.87 47.1809  -2
  -5   2   7 1933.87 47.1809   1
   4  -2   7 2549.43 57.6055  -2
  -4   2   7 2549.43 57.6055   1
   3  -1   7 1212.61 49.8591  -2
  -3   2   7 1212.61 49.8591   1
   2   0   7 813.647 51.9240  -2
  -2   2   7 813.647 51.9240   1
  -1   2   7 486.622 12.2142   1
   0   2   7 937.003 20.2084   1
   1   2   7 39.3992 3.20621   1
   2   2   7 121.225 5.29199   1
   3   2   7 12.9791 2.04495   1
   4   2   7 14.9687 2.36607   1
   5   2   7 0.39640 2.91857   1
   6   2   7 183.739 12.1290   1
   7   2   7 1.64430 4.10800   1
   8   2   7 23.7069 5.94990   1
   9   2   7 4.02054 4.85752   1
  10   2   7 96.8292 16.8327   1
 -14   3   7 -0.1269 6.24343   1
  13 -10   7 382.741 34.9240  -2
 -13   3   7 382.741 34.9240   1
  12  -9   7 230.640 38.1306  -2
 -12   3   7 230.640 38.1306   1
  11  -8   7 22.3109 13.2566  -2
 -11   3   7 22.3109 13.2566   1
  10  -7   7 0.81797 10.7764  -2
 -10   3   7 0.81797 10.7764   1
   9  -6   7 88.7692 5.72130  -2
  -9   3   7 88.7692 5.72130   1
   8  -5   7 -7.6418 10.6583  -2
  -8   3   7 -7.6418 10.6583   1
   7  -4   7 266.640 34.6630  -2
  -7   3   7 266.640 34.6630   1
   6  -3   7 887.586 43.3502  -2
  -6   3   7 887.586 43.3502   1
   5  -2   7 2495.62 56.5237  -2
  -5   3   7 2495.62 56.5237   1
   4  -1   7 1577.56 42.9704  -2
  -4   3   7 1577.56 42.9704   1
  -3   3   7 189.212 7.12664   1
  -2   3   7 183.094 7.50746   1
  -1   3   7 405.186 11.5289   1
   0   3   7 206.797 8.23919   1
   1   3   7 2.43436 1.12263   1
   2   3   7 4.97667 1.60692   1
   3   3   7 103.381 6.11781   1
   4   3   7 107.924 7.91657   1
   5   3   7 136.289 10.3027   1
   6   3   7 2.44533 4.35682   1
   7   3   7 313.018 22.1945   1
   8   3   7 19.2807 6.33944   1
   9   3   7 22.9658 6.92176   1
  14 -10   7 15.9457 15.1083  -2
 -14   4   7 15.9457 15.1083   1
  13  -9   7 69.9191 16.5851  -2
 -13   4   7 69.9191 16.5851   1
  12  -8   7 25.0658 23.6071  -2
 -12   4   7 25.0658 23.6071   1
  11  -7   7 3.18614 13.4891  -2
 -11   4   7 3.18614 13.4891   1
  10  -6   7 192.634 17.3375  -2
 -10   4   7 192.634 17.3375   1
   9  -5   7 714.570 19.2725  -2
  -9   4   7 714.570 19.2725   1
   8  -4   7 717.911 20.3957  -2
  -8   4   7 717.911 20.3957   1
   7  -3   7 536.809 49.0173  -2
  -7   4   7 536.809 49.0173   1
   6  -2   7 1145.66 72.3627  -2
  -6   4   7 1145.66 72.3627   1
  -5   4   7 1517.58 40.8672   1
  -4   4   7 1348.38 29.2327   1
  -3   4   7 337.714 10.9479   1
  -2   4   7 30.2432 4.15883   1
  -1   4   7 11.9744 2.23810   1
   0   4   7 11.8174 2.21539   1
   1   4   7 3.04248 1.58029   1
   2   4   7 120.676 6.46974   1
   3   4   7 532.095 15.6666   1
   4   4   7 897.587 26.0391   1
   5   4   7 11.8009 3.52876   1
   6   4   7 363.043 22.6803   1
   7   4   7 343.523 35.2925   1
   8   4   7 142.169 19.1406   1
   9   4   7 -4.8782 7.44345   1
  14  -9   7 31.9358 16.5683  -2
 -14   5   7 31.9358 16.5683   1
  13  -8   7 -16.197 14.1219  -2
 -13   5   7 -16.197 14.1219   1
  12  -7   7 99.3346 33.3382  -2
 -12   5   7 99.3346 33.3382   1
  11  -6   7 91.0722 9.29589  -2
 -11   5   7 91.0722 9.29589   1
  10  -5   7 611.012 18.0620  -2
 -10   5   7 611.012 18.0620   1
   9  -4   7 884.075 24.0427  -2
  -9   5   7 884.075 24.0427   1
   8  -3   7 435.431 18.4868  -2
  -8   5   7 435.431 18.4868   1
  -7   5   7 23.0067 5.18224   1
  -6   5   7 226.638 11.2555   1
  -5   5   7 889.329 28.5825   1
  -4   5   7 739.350 19.3096   1
  -3   5   7 105.155 6.78149   1
  -2   5   7 17.7644 2.75575   1
  -1   5   7 55.9443 5.73205   1
   0   5   7 111.452 7.31976   1
   1   5   7 8.36378 2.06990   1
   2   5   7 127.217 8.67067   1
   3   5   7 1108.52 29.0440   1
   4   5   7 353.502 15.7371   1
   5   5   7 151.726 16.2742   1
   6   5   7 3.51206 5.19674   1
   7   5   7 57.5719 10.1994   1
   8   5   7 21.9237 7.00865   1
  14  -8   7 27.9016 18.3713  -2
 -14   6   7 27.9016 18.3713   1
  13  -7   7 70.9112 9.90963  -2
 -13   6   7 70.9112 9.90963   1
  12  -6   7 180.067 13.6532  -2
 -12   6   7 180.067 13.6532   1
  11  -5   7 9.36309 8.23878  -2
 -11   6   7 9.36309 8.23878   1
  10  -4   7 332.333 14.4771  -2
 -10   6   7 332.333 14.4771   1
   9  -3   7 811.036 30.8650  -2
  -9   6   7 811.036 30.8650   1
  -8   6   7 513.317 19.8949   1
  -7   6   7 144.961 8.21676   1
  -6   6   7 0.90967 1.71286   1
  -5   6   7 209.796 12.4785   1
  -4   6   7 77.9245 6.64117   1
  -3   6   7 -0.5190 1.65499   1
  -2   6   7 36.0759 4.91702   1
  -1   6   7 166.154 9.04280   1
   0   6   7 475.131 14.0921   1
   1   6   7 47.1782 6.23249   1
   2   6   7 196.576 11.0083   1
   3   6   7 581.149 21.7684   1
   4   6   7 338.661 18.0854   1
   5   6   7 13.6534 5.72166   1
   6   6   7 -2.2359 4.24784   1
   7   6   7 5.90549 7.52759   1
  13  -6   7 162.539 12.9463  -2
 -13   7   7 162.539 12.9463   1
  12  -5   7 128.431 13.6543  -2
 -12   7   7 128.431 13.6543   1
 -11   7   7 47.3515 6.76668   1
 -10   7   7 8.87284 2.87848   1
  -9   7   7 177.848 10.1292   1
  -8   7   7 57.0148 6.59864   1
  -7   7   7 84.7406 7.34762   1
  -6   7   7 324.321 12.2201   1
  -5   7   7 3.73894 2.96872   1
  -4   7   7 139.563 9.03274   1
  -3   7   7 134.466 8.98680   1
  -2   7   7 9.95073 3.01813   1
  -1   7   7 529.048 16.4024   1
   0   7   7 450.940 15.6295   1
   1   7   7 85.9449 8.18245   1
   2   7   7 99.3918 11.1037   1
   3   7   7 461.666 21.8906   1
   4   7   7 267.644 29.2003   1
   5   7   7 48.8412 8.23700   1
   6   7   7 6.00031 5.03900   1
  13  -5   7 161.208 23.7815  -2
 -13   8   7 161.208 23.7815   1
 -12   8   7 6.44410 3.35183   1
 -11   8   7 61.4245 8.79585   1
 -10   8   7 -0.3215 2.39853   1
  -9   8   7 -2.1105 1.92179   1
  -8   8   7 2.63927 2.59985   1
  -7   8   7 97.4250 8.30747   1
  -6   8   7 4.55961 3.74400   1
  -5   8   7 60.3720 8.73720   1
  -4   8   7 12.1447 3.45331   1
  -3   8   7 45.1445 7.13687   1
  -2   8   7 57.6594 9.48166   1
  -1   8   7 166.953 13.4489   1
   0   8   7 359.878 19.1074   1
   1   8   7 58.6817 10.5611   1
   2   8   7 5.73039 4.29312   1
   3   8   7 5.45896 7.06844   1
   4   8   7 16.1275 8.09144   1
   5   8   7 23.2455 6.11933   1
 -13   9   7 -6.9974 5.20998   1
 -12   9   7 1.93129 3.07544   1
 -11   9   7 -1.8599 2.25050   1
 -10   9   7 -1.5652 2.53990   1
  -9   9   7 10.5717 2.82184   1
  -8   9   7 31.6095 5.05178   1
  -7   9   7 547.204 18.5687   1
  -6   9   7 139.715 12.7918   1
  -5   9   7 11.8222 3.21210   1
  -4   9   7 347.873 16.3374   1
  -3   9   7 102.711 9.95049   1
  -2   9   7 71.9684 14.8192   1
  -1   9   7 140.660 13.0963   1
   0   9   7 77.4723 11.1680   1
   1   9   7 16.0162 5.08197   1
   2   9   7 -4.0699 5.29723   1
   3   9   7 -4.8960 6.31895   1
 -12  10   7 12.5561 4.12987   1
 -11  10   7 -4.9861 2.60618   1
 -10  10   7 15.0590 5.02301   1
  -9  10   7 0.59720 2.24458   1
  -8  10   7 464.355 17.3194   1
  -7  10   7 478.627 17.1159   1
  -6  10   7 112.403 13.2586   1
  -5  10   7 1.85974 3.09006   1
  -4  10   7 78.5681 13.0511   1
  -3  10   7 30.4854 5.68496   1
  -2  10   7 54.2891 15.1281   1
  -1  10   7 0.54496 4.44883   1
   0  10   7 -5.6180 9.88739   1
   1  10   7 4.83081 6.96852   1
   2  10   7 9.02797 8.87720   1
  12  -1   7 167.503 25.2885  -2
 -11  11   7 167.503 25.2885   1
 -10  11   7 171.428 11.4734   1
  -9  11   7 -0.1914 2.86165   1
  -8  11   7 231.511 10.8283   1
  -7  11   7 367.961 15.4127   1
  -6  11   7 106.844 14.6007   1
  -5  11   7 15.8465 5.10700   1
  -4  11   7 -0.0199 4.09499   1
  -3  11   7 3.18143 3.40105   1
  -2  11   7 -3.7949 5.52501   1
  -1  11   7 0.74251 6.39086   1
   0  11   7 10.8134 6.45993   1
  -9  12   7 -3.7600 2.44452   1
  -8  12   7 100.900 8.60090   1
  -7  12   7 227.745 12.4984   1
  -6  12   7 86.1882 12.6596   1
  -5  12   7 19.6150 6.92298   1
  -4  12   7 2.43116 3.40944   1
  -3  12   7 5.69128 5.61249   1
  -2  12   7 -4.6321 6.02024   1
   3 -16   8 13.6562 5.94693   1
   4 -16   8 13.7267 5.92537   1
   5 -16   8 145.373 17.0965   1
   6 -16   8 180.301 17.8241   1
   7 -16   8 -3.7177 4.20449   1
  -9  -7   8 -6.4986 27.9136  -2
   8 -16   8 -6.4986 27.9136   1
 -10  -6   8 71.0670 32.0913  -2
   9 -16   8 71.0670 32.0913   1
   1 -15   8 9.69400 6.02568   1
   2 -15   8 23.1110 6.30127   1
   3 -15   8 8.18730 5.53567   1
   4 -15   8 12.1719 5.37147   1
   5 -15   8 9.44401 5.09140   1
   6 -15   8 9.59017 5.80044   1
   7 -15   8 -0.6216 6.02959   1
   8 -15   8 9.49673 5.51360   1
   9 -15   8 29.2385 7.26202   1
  10 -15   8 -2.3891 3.24362   1
  11 -15   8 1.20486 3.51187   1
  -1 -14   8 324.453 21.6204   1
   0 -14   8 317.256 21.4002   1
   1 -14   8 12.7163 5.12577   1
   2 -14   8 20.8371 7.20872   1
   3 -14   8 5.68606 5.10485   1
   4 -14   8 2.58667 4.41769   1
   5 -14   8 25.8473 5.81542   1
   6 -14   8 -1.5885 3.46910   1
   7 -14   8 30.6235 8.72324   1
   8 -14   8 79.9328 18.4452   1
   9 -14   8 -0.7883 2.56343   1
  10 -14   8 13.9995 4.42068   1
  11 -14   8 5.19432 4.65768   1
  12 -14   8 -0.4747 6.27786   1
  -3 -13   8 -3.5614 2.70663   1
  -2 -13   8 295.677 20.2654   1
  -1 -13   8 688.143 30.4182   1
   0 -13   8 367.548 22.9422   1
   1 -13   8 74.6867 12.0836   1
   2 -13   8 20.5046 5.55915   1
   3 -13   8 -2.4650 3.09132   1
   4 -13   8 8.41305 4.17045   1
   5 -13   8 2.15523 3.93269   1
   6 -13   8 81.3694 12.7750   1
   7 -13   8 348.491 20.0856   1
   8 -13   8 277.694 10.5564   1
   9 -13   8 2.36381 3.55017   1
  10 -13   8 32.9964 4.72453   1
 -11  -2   8 285.739 32.5808  -2
  11 -13   8 285.739 32.5808   1
  12 -13   8 -4.0553 4.68823   1
  -4 -12   8 340.195 16.4785   1
  -3 -12   8 1.12683 2.96472   1
  -2 -12   8 293.006 13.5482   1
  -1 -12   8 592.388 26.4798   1
   0 -12   8 421.656 21.8260   1
   1 -12   8 188.073 15.0381   1
   2 -12   8 15.9957 4.85938   1
   3 -12   8 114.266 12.3931   1
   4 -12   8 109.233 12.7336   1
   5 -12   8 6.37193 4.20047   1
   6 -12   8 716.768 21.5531   1
   7 -12   8 459.870 15.1981   1
   8 -12   8 692.933 20.1833   1
   9 -12   8 6.80757 2.76589   1
 -10  -2   8 17.0681 20.0284  -2
  10 -12   8 17.0681 20.0284   1
 -11  -1   8 247.718 32.0617  -2
  11 -12   8 247.718 32.0617   1
 -12   0   8 62.2125 28.1835  -2
  12 -12   8 62.2125 28.1835   1
  -5 -11   8 683.885 23.8343   1
  -4 -11   8 129.761 11.0325   1
  -3 -11   8 5.37344 2.95950   1
  -2 -11   8 172.535 10.6616   1
  -1 -11   8 405.585 14.3558   1
   0 -11   8 106.706 12.1266   1
   1 -11   8 79.2225 10.9885   1
   2 -11   8 625.120 25.9659   1
   3 -11   8 501.690 23.1857   1
   4 -11   8 288.449 10.2674   1
   5 -11   8 2.35461 3.78585   1
   6 -11   8 886.446 22.2038   1
   7 -11   8 1990.17 48.9697   1
  -8  -3   8 2566.00 95.0273  -2
   8 -11   8 2566.00 95.0273   1
  -9  -2   8 383.291 24.1610  -2
   9 -11   8 383.291 24.1610   1
 -10  -1   8 9.62038 13.5153  -2
  10 -11   8 9.62038 13.5153   1
 -11   0   8 -14.005 20.3323  -2
  11 -11   8 -14.005 20.3323   1
 -12   1   8 -11.299 22.3742  -2
  12 -11   8 -11.299 22.3742   1
 -13   2   8 -13.099 22.6537  -2
  13 -11   8 -13.099 22.6537   1
  -6 -10   8 305.927 17.0566   1
  -5 -10   8 298.413 15.3357   1
  -4 -10   8 204.230 12.4422   1
  -3 -10   8 5.53418 2.84582   1
  -2 -10   8 30.1788 4.97850   1
   1 -11   8 55.9319 26.4104  -2
  -1 -10   8 55.9319 26.4104   1
   0 -10   8 82.8066 5.24466   1
   1 -10   8 225.508 7.62331   1
   2 -10   8 1026.50 24.3360   1
   3 -10   8 792.659 20.1931   1
  -4  -6   8 639.286 41.6651  -2
   4 -10   8 639.286 41.6651   1
  -5  -5   8 180.341 25.9626  -2
   5 -10   8 180.341 25.9626   1
  -6  -4   8 1024.84 33.5145  -2
   6 -10   8 1024.84 33.5145   1
  -7  -3   8 2716.06 51.4725  -2
   7 -10   8 2716.06 51.4725   1
  -8  -2   8 936.684 29.6299  -2
   8 -10   8 936.684 29.6299   1
  -9  -1   8 31.5214 14.0051  -2
   9 -10   8 31.5214 14.0051   1
 -10   0   8 35.7556 14.1303  -2
  10 -10   8 35.7556 14.1303   1
 -11   1   8 18.2811 14.2867  -2
  11 -10   8 18.2811 14.2867   1
 -12   2   8 90.2889 17.5556  -2
  12 -10   8 90.2889 17.5556   1
 -13   3   8 51.1186 22.7031  -2
  13 -10   8 51.1186 22.7031   1
  -7  -9   8 -0.5767 3.66105   1
  -6  -9   8 128.788 11.2284   1
  -5  -9   8 104.013 9.94082   1
  -4  -9   8 0.37390 2.47365   1
  -3  -9   8 29.9332 3.98530   1
   2 -11   8 471.446 38.0082  -2
  -2  -9   8 471.446 38.0082   1
   1 -10   8 153.267 26.5755  -2
  -1  -9   8 153.267 26.5755   1
   0  -9   8 46.6501 19.5325  -2
   0  -9   8 46.6501 19.5325   1
  -1  -8   8 268.571 28.9123  -2
   1  -9   8 268.571 28.9123   1
   2  -9   8 1337.63 29.2202   1
  -3  -6   8 1430.62 63.7757  -2
   3  -9   8 1430.62 63.7757   1
  -4  -5   8 1645.15 69.9437  -2
   4  -9   8 1645.15 69.9437   1
  -5  -4   8 113.635 10.4327  -2
   5  -9   8 113.635 10.4327   1
  -6  -3   8 1358.33 30.0177  -2
   6  -9   8 1358.33 30.0177   1
  -7  -2   8 2260.81 44.8000  -2
   7  -9   8 2260.81 44.8000   1
  -8  -1   8 594.603 25.5832  -2
   8  -9   8 594.603 25.5832   1
  -9   0   8 161.449 16.6337  -2
   9  -9   8 161.449 16.6337   1
 -10   1   8 177.520 18.9324  -2
  10  -9   8 177.520 18.9324   1
 -11   2   8 451.672 27.3314  -2
  11  -9   8 451.672 27.3314   1
 -12   3   8 59.1633 14.9232  -2
  12  -9   8 59.1633 14.9232   1
  -8  -8   8 -6.8727 4.99521   1
  -7  -8   8 63.9062 9.82688   1
  -6  -8   8 97.9226 11.2116   1
  -5  -8   8 30.6617 4.87092   1
   4 -12   8 133.587 25.6004  -2
  -4  -8   8 133.587 25.6004   1
   3 -11   8 466.389 35.4578  -2
  -3  -8   8 466.389 35.4578   1
   2 -10   8 873.679 49.1701  -2
  -2  -8   8 873.679 49.1701   1
   1  -9   8 321.633 27.1530  -2
  -1  -8   8 321.633 27.1530   1
   0  -8   8 9.76098 15.9822  -2
   0  -8   8 9.76098 15.9822   1
  -1  -7   8 8.53342 11.3544  -2
   1  -8   8 8.53342 11.3544   1
  -2  -6   8 864.273 44.3474  -2
   2  -8   8 864.273 44.3474   1
  -3  -5   8 2664.90 96.9193  -2
   3  -8   8 2664.90 96.9193   1
  -4  -4   8 703.363 22.9223  -2
   4  -8   8 703.363 22.9223   1
  -5  -3   8 80.0530 8.97207  -2
   5  -8   8 80.0530 8.97207   1
  -6  -2   8 609.557 17.7141  -2
   6  -8   8 609.557 17.7141   1
  -7  -1   8 353.152 19.6662  -2
   7  -8   8 353.152 19.6662   1
  -8   0   8 171.658 12.1583  -2
   8  -8   8 171.658 12.1583   1
  -9   1   8 299.930 20.7780  -2
   9  -8   8 299.930 20.7780   1
 -10   2   8 917.802 38.8567  -2
  10  -8   8 917.802 38.8567   1
 -11   3   8 866.065 56.5301  -2
  11  -8   8 866.065 56.5301   1
 -12   4   8 139.323 29.0175  -2
  12  -8   8 139.323 29.0175   1
  -9  -7   8 -2.7761 4.23712   1
  -8  -7   8 44.2950 7.20195   1
  -7  -7   8 90.2043 10.0678   1
  -6  -7   8 44.5189 8.92351   1
  -5  -7   8 83.2403 8.13619   1
   4 -11   8 713.489 41.6591  -2
  -4  -7   8 713.489 41.6591   1
   3 -10   8 1120.68 53.5530  -2
  -3  -7   8 1120.68 53.5530   1
   2  -9   8 1110.17 53.8818  -2
  -2  -7   8 1110.17 53.8818   1
   1  -8   8 34.4474 15.9785  -2
  -1  -7   8 34.4474 15.9785   1
   0  -7   8 787.331 40.3890  -2
   0  -7   8 787.331 40.3890   1
  -1  -6   8 66.8457 9.65503  -2
   1  -7   8 66.8457 9.65503   1
  -2  -5   8 282.543 19.5697  -2
   2  -7   8 282.543 19.5697   1
  -3  -4   8 788.672 23.8350  -2
   3  -7   8 788.672 23.8350   1
  -4  -3   8 829.313 24.6575  -2
   4  -7   8 829.313 24.6575   1
  -5  -2   8 1.40966 6.16051  -2
   5  -7   8 1.40966 6.16051   1
  -6  -1   8 15.4843 5.64688  -2
   6  -7   8 15.4843 5.64688   1
  -7   0   8 22.2081 6.13036  -2
   7  -7   8 22.2081 6.13036   1
  -8   1   8 31.9566 9.78195  -2
   8  -7   8 31.9566 9.78195   1
  -9   2   8 343.048 31.9836  -2
   9  -7   8 343.048 31.9836   1
 -10   3   8 1295.07 69.2876  -2
  10  -7   8 1295.07 69.2876   1
 -11   4   8 987.376 62.6234  -2
  11  -7   8 987.376 62.6234   1
 -13   6   8 36.9615 30.3044  -2
  13  -7   8 36.9615 30.3044   1
 -10  -6   8 6.09471 4.67509   1
  -9  -6   8 112.956 13.8502   1
  -8  -6   8 176.595 14.7580   1
  -7  -6   8 486.883 21.7997   1
  -6  -6   8 68.6923 6.76385   1
  -5  -6   8 173.251 10.2571   1
   4 -10   8 714.453 39.7867  -2
  -4  -6   8 714.453 39.7867   1
   3  -9   8 1262.55 39.9705  -2
  -3  -6   8 1262.55 39.9705   1
   2  -8   8 827.994 42.7025  -2
  -2  -6   8 827.994 42.7025   1
   1  -7   8 74.0619 8.60520  -2
  -1  -6   8 74.0619 8.60520   1
   0  -6   8 115.261 8.20251  -2
   0  -6   8 115.261 8.20251   1
  -1  -5   8 523.306 18.0240  -2
   1  -6   8 523.306 18.0240   1
  -2  -4   8 546.356 14.9684  -2
   2  -6   8 546.356 14.9684   1
  -3  -3   8 1082.11 23.3713  -2
   3  -6   8 1082.11 23.3713   1
  -4  -2   8 413.785 14.2545  -2
   4  -6   8 413.785 14.2545   1
  -5  -1   8 507.681 14.1053  -2
   5  -6   8 507.681 14.1053   1
  -6   0   8 69.4455 9.54180  -2
   6  -6   8 69.4455 9.54180   1
  -7   1   8 198.866 12.4458  -2
   7  -6   8 198.866 12.4458   1
  -9   3   8 543.740 41.0452  -2
   9  -6   8 543.740 41.0452   1
 -10   4   8 796.906 53.6307  -2
  10  -6   8 796.906 53.6307   1
 -11   5   8 1015.59 66.5232  -2
  11  -6   8 1015.59 66.5232   1
 -10  -5   8 -6.2207 3.72148   1
  -9  -5   8 136.573 14.0709   1
  -8  -5   8 700.370 26.8962   1
  -7  -5   8 911.389 35.2509   1
  -6  -5   8 93.5400 7.49335   1
  -5  -5   8 8.35629 2.82612   1
   4  -9   8 1827.72 34.0593  -2
  -4  -5   8 1827.72 34.0593   1
   3  -8   8 2391.48 76.3064  -2
  -3  -5   8 2391.48 76.3064   1
   2  -7   8 250.119 10.3467  -2
  -2  -5   8 250.119 10.3467   1
   1  -6   8 447.039 12.8253  -2
  -1  -5   8 447.039 12.8253   1
   0  -5   8 23.9356 6.72273  -2
   0  -5   8 23.9356 6.72273   1
  -1  -4   8 1648.73 35.9807  -2
   1  -5   8 1648.73 35.9807   1
  -2  -3   8 129.596 7.18703  -2
   2  -5   8 129.596 7.18703   1
  -3  -2   8 163.842 8.99890  -2
   3  -5   8 163.842 8.99890   1
  -4  -1   8 533.381 14.3805  -2
   4  -5   8 533.381 14.3805   1
  -5   0   8 148.242 7.76455  -2
   5  -5   8 148.242 7.76455   1
  -6   1   8 418.181 29.8912  -2
   6  -5   8 418.181 29.8912   1
  -7   2   8 750.268 29.6896  -2
   7  -5   8 750.268 29.6896   1
  -8   3   8 -9.0874 16.7169  -2
   8  -5   8 -9.0874 16.7169   1
  -9   4   8 417.480 39.0649  -2
   9  -5   8 417.480 39.0649   1
 -10   5   8 860.133 58.6640  -2
  10  -5   8 860.133 58.6640   1
 -11   6   8 300.948 40.3575  -2
  11  -5   8 300.948 40.3575   1
  13  -5   8 -6.1392 8.19129   1
 -11  -4   8 1.59398 4.19177   1
 -10  -4   8 -4.5678 3.48904   1
   9 -13   8 300.703 24.1378  -2
  -9  -4   8 300.703 24.1378   1
  -8  -4   8 426.646 15.2993   1
   7 -11   8 2028.21 79.9659  -2
  -7  -4   8 2028.21 79.9659   1
   6 -10   8 1042.22 24.6947  -2
  -6  -4   8 1042.22 24.6947   1
   5  -9   8 127.126 8.10566  -2
  -5  -4   8 127.126 8.10566   1
   4  -8   8 537.660 14.4624  -2
  -4  -4   8 537.660 14.4624   1
   3  -7   8 663.096 17.0130  -2
  -3  -4   8 663.096 17.0130   1
   2  -6   8 534.084 13.7367  -2
  -2  -4   8 534.084 13.7367   1
   1  -5   8 1590.79 28.9987  -2
  -1  -4   8 1590.79 28.9987   1
   0  -4   8 2830.93 54.1230  -2
   0  -4   8 2830.93 54.1230   1
  -1  -3   8 2724.39 51.9767  -2
   1  -4   8 2724.39 51.9767   1
  -2  -2   8 499.798 13.2310  -2
   2  -4   8 499.798 13.2310   1
  -3  -1   8 2638.07 51.0490  -2
   3  -4   8 2638.07 51.0490   1
  -4   0   8 2043.38 36.7711  -2
   4  -4   8 2043.38 36.7711   1
  -5   1   8 1059.34 31.0455  -2
   5  -4   8 1059.34 31.0455   1
  -6   2   8 393.165 20.8548  -2
   6  -4   8 393.165 20.8548   1
  -7   3   8 94.0806 13.6140  -2
   7  -4   8 94.0806 13.6140   1
  -8   4   8 63.3134 13.5894  -2
   8  -4   8 63.3134 13.5894   1
  -9   5   8 372.788 38.8012  -2
   9  -4   8 372.788 38.8012   1
 -10   6   8 148.755 33.3261  -2
  10  -4   8 148.755 33.3261   1
  11  -4   8 155.463 29.6427   1
  12  -4   8 -6.1997 6.77347   1
  13  -4   8 3.00528 9.91120   1
 -12  -3   8 105.794 24.7403   1
 -11  -3   8 165.139 15.2111   1
 -10  -3   8 15.4506 4.50004   1
   9 -12   8 261.286 29.8306  -2
  -9  -3   8 261.286 29.8306   1
   8 -11   8 2719.16 66.9927  -2
  -8  -3   8 2719.16 66.9927   1
   7 -10   8 3333.15 61.8103  -2
  -7  -3   8 3333.15 61.8103   1
   6  -9   8 1422.87 29.6754  -2
  -6  -3   8 1422.87 29.6754   1
   5  -8   8 82.9842 6.44254  -2
  -5  -3   8 82.9842 6.44254   1
   4  -7   8 795.195 21.4379  -2
  -4  -3   8 795.195 21.4379   1
   3  -6   8 873.629 18.2748  -2
  -3  -3   8 873.629 18.2748   1
   2  -5   8 111.750 5.73203  -2
  -2  -3   8 111.750 5.73203   1
   1  -4   8 2499.54 48.2705  -2
  -1  -3   8 2499.54 48.2705   1
   0  -3   8 6817.66 115.762  -2
   0  -3   8 6817.66 115.762   1
  -1  -2   8 3338.04 60.7825  -2
   1  -3   8 3338.04 60.7825   1
  -2  -1   8 818.411 20.9198  -2
   2  -3   8 818.411 20.9198   1
  -3   0   8 584.504 17.1353  -2
   3  -3   8 584.504 17.1353   1
  -4   1   8 2962.95 57.4240  -2
   4  -3   8 2962.95 57.4240   1
  -5   2   8 1186.67 65.4798  -2
   5  -3   8 1186.67 65.4798   1
  -6   3   8 331.878 16.8539  -2
   6  -3   8 331.878 16.8539   1
  -7   4   8 51.9397 14.5643  -2
   7  -3   8 51.9397 14.5643   1
  -8   5   8 112.692 17.6138  -2
   8  -3   8 112.692 17.6138   1
   9  -3   8 50.9389 9.09073   1
  10  -3   8 56.3257 10.1465   1
  11  -3   8 11.1607 10.8398   1
  12  -3   8 50.9542 14.4402   1
  12 -14   8 147.965 31.8563  -2
 -12  -2   8 147.965 31.8563   1
  10 -12   8 -15.740 17.7240  -2
 -10  -2   8 -15.740 17.7240   1
   9 -11   8 429.026 19.6571  -2
  -9  -2   8 429.026 19.6571   1
   8 -10   8 994.330 28.4285  -2
  -8  -2   8 994.330 28.4285   1
   7  -9   8 2156.03 39.3523  -2
  -7  -2   8 2156.03 39.3523   1
   6  -8   8 657.681 16.7890  -2
  -6  -2   8 657.681 16.7890   1
   5  -7   8 26.5410 4.91448  -2
  -5  -2   8 26.5410 4.91448   1
   4  -6   8 440.882 12.6765  -2
  -4  -2   8 440.882 12.6765   1
   3  -5   8 149.589 5.71279  -2
  -3  -2   8 149.589 5.71279   1
   2  -4   8 469.876 13.8595  -2
  -2  -2   8 469.876 13.8595   1
   1  -3   8 3134.66 57.2753  -2
  -1  -2   8 3134.66 57.2753   1
   0  -2   8 9298.33 169.876  -2
   0  -2   8 9298.33 169.876   1
  -1  -1   8 3341.96 73.6270  -2
   1  -2   8 3341.96 73.6270   1
  -2   0   8 1929.30 39.3851  -2
   2  -2   8 1929.30 39.3851   1
  -3   1   8 871.301 35.9530  -2
   3  -2   8 871.301 35.9530   1
  -4   2   8 442.674 23.8428  -2
   4  -2   8 442.674 23.8428   1
  -5   3   8 392.416 36.3546  -2
   5  -2   8 392.416 36.3546   1
  -6   4   8 679.578 44.3974  -2
   6  -2   8 679.578 44.3974   1
   7  -2   8 151.463 16.4381   1
   8  -2   8 629.568 32.1835   1
   9  -2   8 432.356 27.6408   1
  10  -2   8 97.0974 17.0400   1
  11  -2   8 99.8082 18.0620   1
  12  -2   8 35.8746 9.01293   1
  12 -13   8 127.790 29.0160  -2
 -12  -1   8 127.790 29.0160   1
   9 -10   8 51.5582 8.04250  -2
  -9  -1   8 51.5582 8.04250   1
   8  -9   8 695.240 21.1423  -2
  -8  -1   8 695.240 21.1423   1
   7  -8   8 385.002 16.1971  -2
  -7  -1   8 385.002 16.1971   1
   6  -7   8 5.64399 9.44670  -2
  -6  -1   8 5.64399 9.44670   1
   5  -6   8 499.992 14.0714  -2
  -5  -1   8 499.992 14.0714   1
   4  -5   8 495.730 14.7642  -2
  -4  -1   8 495.730 14.7642   1
   3  -4   8 2635.72 42.2618  -2
  -3  -1   8 2635.72 42.2618   1
   2  -3   8 697.856 21.8498  -2
  -2  -1   8 697.856 21.8498   1
   1  -2   8 2838.56 51.8136  -2
  -1  -1   8 2838.56 51.8136   1
   0  -1   8 8722.81 174.627  -2
   0  -1   8 8722.81 174.627   1
  -1   0   8 3698.71 79.8176  -2
   1  -1   8 3698.71 79.8176   1
  -2   1   8 2020.87 39.2141  -2
   2  -1   8 2020.87 39.2141   1
  -3   2   8 139.526 23.5446  -2
   3  -1   8 139.526 23.5446   1
   4  -1   8 360.508 14.0635   1
   5  -1   8 185.137 10.2625   1
   6  -1   8 66.2222 12.1236   1
   7  -1   8 750.263 35.5895   1
   8  -1   8 558.418 31.4260   1
   9  -1   8 268.818 23.7198   1
  10  -1   8 11.0572 7.06302   1
  11  -1   8 17.2056 8.04051   1
 -13   0   8 -2.3690 5.70971   1
  12 -12   8 20.7998 21.5484  -2
 -12   0   8 20.7998 21.5484   1
  10 -10   8 6.19427 15.2865  -2
 -10   0   8 6.19427 15.2865   1
   9  -9   8 165.855 18.3590  -2
  -9   0   8 165.855 18.3590   1
   8  -8   8 167.639 7.47458  -2
  -8   0   8 167.639 7.47458   1
   7  -7   8 23.2400 9.15403  -2
  -7   0   8 23.2400 9.15403   1
   6  -6   8 49.6324 9.88698  -2
  -6   0   8 49.6324 9.88698   1
   5  -5   8 122.510 9.81343  -2
  -5   0   8 122.510 9.81343   1
   4  -4   8 1996.95 49.2874  -2
  -4   0   8 1996.95 49.2874   1
   3  -3   8 761.347 39.5476  -2
  -3   0   8 761.347 39.5476   1
   2  -2   8 1560.92 25.9151  -2
  -2   0   8 1560.92 25.9151   1
   1  -1   8 3191.46 100.066  -2
  -1   0   8 3191.46 100.066   1
   0   0   8 8113.84 160.097  -2
   0   0   8 8113.84 160.097   1
  -1   1   8 4136.30 79.3046  -2
   1   0   8 4136.30 79.3046   1
  -2   2   8 141.052 14.8949  -2
   2   0   8 141.052 14.8949   1
   3   0   8 19.4784 3.25428   1
   4   0   8 13.3637 2.64157   1
   5   0   8 88.7130 8.53191   1
   6   0   8 155.784 17.3218   1
   7   0   8 327.818 24.3631   1
   8   0   8 599.090 33.9437   1
   9   0   8 697.750 42.7069   1
  10   0   8 243.853 25.4532   1
  11   0   8 3.48610 7.06802   1
  13 -12   8 -12.465 21.3951  -2
 -13   1   8 -12.465 21.3951   1
  12 -11   8 -11.389 17.8172  -2
 -12   1   8 -11.389 17.8172   1
  11 -10   8 21.3162 14.2376  -2
 -11   1   8 21.3162 14.2376   1
  10  -9   8 157.765 18.5238  -2
 -10   1   8 157.765 18.5238   1
   9  -8   8 321.076 11.4929  -2
  -9   1   8 321.076 11.4929   1
   8  -7   8 34.5545 5.40967  -2
  -8   1   8 34.5545 5.40967   1
   7  -6   8 231.530 15.6092  -2
  -7   1   8 231.530 15.6092   1
   6  -5   8 425.253 20.9556  -2
  -6   1   8 425.253 20.9556   1
   5  -4   8 848.292 26.9804  -2
  -5   1   8 848.292 26.9804   1
   4  -3   8 2975.96 98.0193  -2
  -4   1   8 2975.96 98.0193   1
   3  -2   8 970.646 26.6086  -2
  -3   1   8 970.646 26.6086   1
   2  -1   8 1485.04 36.1679  -2
  -2   1   8 1485.04 36.1679   1
   1   0   8 3563.22 109.778  -2
  -1   1   8 3563.22 109.778   1
   0   1   8 1985.84 64.5862  -2
   0   1   8 1985.84 64.5862   1
   1   1   8 274.861 9.88205   1
   2   1   8 74.2803 5.49803   1
   3   1   8 408.457 13.0537   1
   4   1   8 799.281 19.2914   1
   5   1   8 614.743 23.3421   1
   6   1   8 28.5049 5.33296   1
   7   1   8 278.144 17.3840   1
   8   1   8 1250.53 39.5598   1
   9   1   8 1393.60 60.2771   1
  10   1   8 255.690 26.2407   1
  13 -11   8 3.90301 17.8076  -2
 -13   2   8 3.90301 17.8076   1
  12 -10   8 94.2137 17.1296  -2
 -12   2   8 94.2137 17.1296   1
  11  -9   8 500.875 30.4216  -2
 -11   2   8 500.875 30.4216   1
  10  -8   8 946.634 24.7098  -2
 -10   2   8 946.634 24.7098   1
   9  -7   8 410.226 16.9688  -2
  -9   2   8 410.226 16.9688   1
   8  -6   8 175.539 16.0603  -2
  -8   2   8 175.539 16.0603   1
   7  -5   8 870.624 32.2272  -2
  -7   2   8 870.624 32.2272   1
   6  -4   8 413.783 45.1055  -2
  -6   2   8 413.783 45.1055   1
   5  -3   8 798.508 57.3098  -2
  -5   2   8 798.508 57.3098   1
   4  -2   8 359.082 13.8621  -2
  -4   2   8 359.082 13.8621   1
   3  -1   8 143.834 19.7852  -2
  -3   2   8 143.834 19.7852   1
  -2   2   8 0.84890 1.22430   1
  -1   2   8 284.461 9.23380   1
   0   2   8 61.4709 4.91132   1
   1   2   8 29.8920 3.09718   1
   2   2   8 45.5922 4.30682   1
   3   2   8 39.2733 3.56589   1
   4   2   8 291.961 12.1891   1
   5   2   8 360.459 14.3938   1
   6   2   8 119.291 15.1448   1
   7   2   8 27.0449 6.52892   1
   8   2   8 609.660 33.3686   1
   9   2   8 705.829 29.9258   1
  10   2   8 116.411 22.0080   1
  13 -10   8 67.5209 16.7899  -2
 -13   3   8 67.5209 16.7899   1
  12  -9   8 62.7791 29.3296  -2
 -12   3   8 62.7791 29.3296   1
  11  -8   8 871.278 40.0260  -2
 -11   3   8 871.278 40.0260   1
  10  -7   8 1316.70 50.1876  -2
 -10   3   8 1316.70 50.1876   1
   9  -6   8 696.792 33.7508  -2
  -9   3   8 696.792 33.7508   1
   8  -5   8 -18.490 16.9258  -2
  -8   3   8 -18.490 16.9258   1
   7  -4   8 90.5979 31.5707  -2
  -7   3   8 90.5979 31.5707   1
   5  -2   8 295.113 15.7621  -2
  -5   3   8 295.113 15.7621   1
  -4   3   8 26.4417 2.85329   1
  -3   3   8 78.5869 5.28083   1
  -2   3   8 187.828 8.06070   1
  -1   3   8 601.638 15.2243   1
   0   3   8 142.742 7.49602   1
   1   3   8 54.7790 4.28305   1
   2   3   8 79.4092 5.00507   1
   3   3   8 46.3413 5.48746   1
   4   3   8 417.528 16.2530   1
   5   3   8 80.8669 10.4947   1
   6   3   8 16.4044 5.17369   1
   7   3   8 224.809 19.6489   1
   8   3   8 202.735 21.3433   1
   9   3   8 31.1278 8.15687   1
  13  -9   8 158.471 20.7282  -2
 -13   4   8 158.471 20.7282   1
  12  -8   8 215.951 41.3309  -2
 -12   4   8 215.951 41.3309   1
  11  -7   8 1000.94 43.3887  -2
 -11   4   8 1000.94 43.3887   1
  10  -6   8 964.979 41.9939  -2
 -10   4   8 964.979 41.9939   1
   9  -5   8 569.771 30.6158  -2
  -9   4   8 569.771 30.6158   1
   8  -4   8 79.3043 22.8010  -2
  -8   4   8 79.3043 22.8010   1
   7  -3   8 25.1702 20.0523  -2
  -7   4   8 25.1702 20.0523   1
   6  -2   8 565.394 50.6049  -2
  -6   4   8 565.394 50.6049   1
  -5   4   8 94.0994 7.20723   1
  -4   4   8 13.3433 2.60572   1
  -3   4   8 650.249 17.3422   1
  -2   4   8 1102.47 23.5236   1
  -1   4   8 643.057 17.2153   1
   0   4   8 8.15888 2.13502   1
   1   4   8 111.039 6.03117   1
   2   4   8 132.533 8.01060   1
   3   4   8 0.91855 2.30161   1
   4   4   8 18.1207 4.21050   1
   5   4   8 91.1163 10.1956   1
   6   4   8 -0.8186 4.16906   1
   7   4   8 120.237 16.9835   1
   8   4   8 22.6441 7.16635   1
  13  -8   8 80.7123 8.82196  -2
 -13   5   8 80.7123 8.82196   1
  12  -7   8 130.443 37.8758  -2
 -12   5   8 130.443 37.8758   1
  11  -6   8 958.229 41.9566  -2
 -11   5   8 958.229 41.9566   1
  10  -5   8 1111.51 45.3309  -2
 -10   5   8 1111.51 45.3309   1
   9  -4   8 513.490 29.2688  -2
  -9   5   8 513.490 29.2688   1
  -8   5   8 117.203 10.2955   1
  -7   5   8 36.2304 4.94153   1
  -6   5   8 280.391 9.91748   1
  -5   5   8 43.3893 6.21336   1
  -4   5   8 116.062 6.99554   1
  -3   5   8 837.723 21.7991   1
  -2   5   8 1482.97 30.2002   1
  -1   5   8 908.815 22.8433   1
   0   5   8 100.993 7.61032   1
   1   5   8 78.6459 6.43530   1
   2   5   8 104.778 9.24243   1
   3   5   8 23.8807 4.03737   1
   4   5   8 1.92142 3.89615   1
   5   5   8 59.9504 12.8948   1
   6   5   8 119.649 16.5271   1
   7   5   8 22.5941 9.37058   1
  13  -7   8 199.065 10.6051  -2
 -13   6   8 199.065 10.6051   1
  12  -6   8 161.457 39.3835  -2
 -12   6   8 161.457 39.3835   1
  11  -5   8 314.628 26.2037  -2
 -11   6   8 314.628 26.2037   1
  10  -4   8 192.773 23.8515  -2
 -10   6   8 192.773 23.8515   1
  -9   6   8 99.7048 6.98324   1
  -8   6   8 364.472 15.6705   1
  -7   6   8 954.974 23.7559   1
  -6   6   8 1582.63 45.7208   1
  -5   6   8 180.964 12.0169   1
  -4   6   8 1.10059 2.06249   1
  -3   6   8 554.995 15.6674   1
  -2   6   8 1546.56 32.1213   1
  -1   6   8 648.090 18.3100   1
   0   6   8 273.460 14.6365   1
   1   6   8 0.19531 2.62809   1
   2   6   8 3.86600 5.65866   1
   3   6   8 0.03754 5.01900   1
   4   6   8 15.9052 4.60931   1
   5   6   8 112.373 15.8010   1
   6   6   8 285.899 22.4632   1
  13  -6   8 30.5737 6.77698  -2
 -13   7   8 30.5737 6.77698   1
  12  -5   8 -24.736 8.67328  -2
 -12   7   8 -24.736 8.67328   1
 -11   7   8 -5.1471 2.04326   1
 -10   7   8 -3.7138 2.08990   1
  -9   7   8 -0.6578 1.82998   1
  -8   7   8 148.422 8.71093   1
  -7   7   8 738.488 20.3273   1
  -6   7   8 1243.61 39.7583   1
  -5   7   8 593.063 24.8971   1
  -4   7   8 0.62266 2.22323   1
  -3   7   8 656.385 24.1244   1
  -2   7   8 1204.98 33.8199   1
  -1   7   8 519.990 20.8573   1
   0   7   8 171.043 16.6437   1
   1   7   8 34.9475 9.11093   1
   2   7   8 100.221 11.3141   1
   3   7   8 23.5398 5.67795   1
   4   7   8 6.99122 6.87019   1
   5   7   8 181.017 19.0074   1
 -13   8   8 25.3189 4.00773   1
 -12   8   8 2.78432 2.85687   1
 -11   8   8 -1.3791 2.87937   1
 -10   8   8 -3.2969 3.72917   1
  -9   8   8 6.94903 2.41330   1
  -8   8   8 -0.9510 2.30787   1
  -7   8   8 296.643 16.7973   1
  -6   8   8 221.744 15.4763   1
  -5   8   8 343.302 20.1437   1
  -4   8   8 -0.8103 2.44427   1
  -3   8   8 71.8903 9.47859   1
  -2   8   8 265.290 15.0437   1
  -1   8   8 79.0967 13.1357   1
   0   8   8 196.211 21.0139   1
   1   8   8 273.270 16.2919   1
   2   8   8 222.153 16.3488   1
   3   8   8 106.599 20.4656   1
   4   8   8 15.1048 8.41379   1
 -12   9   8 26.1717 4.43547   1
 -11   9   8 -3.5118 2.31741   1
 -10   9   8 14.6125 3.04697   1
  -9   9   8 80.8834 7.15581   1
  -8   9   8 -0.1622 2.50633   1
  -7   9   8 85.5192 15.9227   1
  -6   9   8 282.284 18.0616   1
  -5   9   8 90.6779 12.4218   1
  -4   9   8 0.40037 3.84829   1
  -3   9   8 7.36021 4.85995   1
  -2   9   8 106.517 14.7249   1
  -1   9   8 31.9816 7.32397   1
   0   9   8 164.698 14.2533   1
   1   9   8 381.957 27.1010   1
   2   9   8 254.619 28.1033   1
   3   9   8 104.388 21.4489   1
 -11  10   8 -2.0590 2.63496   1
 -10  10   8 15.6998 3.28099   1
  -9  10   8 5.59760 2.49086   1
  -8  10   8 -2.6938 3.75196   1
  -7  10   8 139.828 14.2428   1
  -6  10   8 13.1488 5.46141   1
  -5  10   8 80.3452 12.8644   1
  -4  10   8 -4.2866 4.00678   1
  -3  10   8 2.41235 4.55238   1
  -2  10   8 10.2320 5.80982   1
  -1  10   8 0.29452 4.85920   1
   0  10   8 38.7896 10.1982   1
   1  10   8 150.429 17.0290   1
 -10  11   8 0.46324 2.59694   1
  -9  11   8 -2.7614 2.96222   1
  -8  11   8 3.54582 5.23495   1
  -7  11   8 15.3368 5.59715   1
  -6  11   8 -2.9619 4.26119   1
  -5  11   8 3.82327 4.75306   1
  -4  11   8 17.6967 5.84035   1
  -3  11   8 -3.0023 4.66614   1
  -2  11   8 11.6013 6.32671   1
  -1  11   8 1.35892 5.23577   1
  -8  12   8 49.5217 10.5420   1
  -7  12   8 14.3741 6.09654   1
  -6  12   8 2.03509 4.21019   1
  -5  12   8 78.9918 12.9833   1
   4 -16   9 124.552 16.4508   1
   5 -16   9 114.628 16.1134   1
   6 -16   9 11.7499 5.86927   1
   7 -16   9 21.6364 6.87490   1
  -9  -7   9 98.5147 34.0444  -2
   8 -16   9 98.5147 34.0444   1
   1 -15   9 58.5490 10.6452   1
   2 -15   9 2.90725 5.04159   1
   3 -15   9 -1.5666 3.53703   1
   4 -15   9 3.89870 4.83198   1
   5 -15   9 -0.0844 4.01122   1
   6 -15   9 5.02565 4.79567   1
   7 -15   9 160.652 17.0138   1
   8 -15   9 306.864 22.0476   1
 -10  -5   9 330.765 42.2886  -2
   9 -15   9 330.765 42.2886   1
  10 -15   9 -3.4872 3.02184   1
  -1 -14   9 5.50714 5.29050   1
   0 -14   9 25.5949 6.45480   1
   1 -14   9 28.1547 6.44140   1
   2 -14   9 -5.5589 4.12366   1
   3 -14   9 3.34229 7.97349   1
   4 -14   9 71.9664 19.3201   1
   5 -14   9 107.109 16.8628   1
   6 -14   9 5.36717 6.72986   1
   7 -14   9 151.485 24.8232   1
   8 -14   9 496.527 36.0909   1
   9 -14   9 258.640 11.7182   1
  10 -14   9 -1.7659 4.14085   1
  11 -14   9 19.6472 5.63663   1
  -3 -13   9 100.300 10.1144   1
  -2 -13   9 8.62408 5.26300   1
  -1 -13   9 1.10748 4.52561   1
   0 -13   9 0.75033 4.41510   1
   1 -13   9 55.3965 11.7077   1
   2 -13   9 79.2388 12.2199   1
   3 -13   9 5.05218 4.08642   1
   4 -13   9 105.420 12.9667   1
   5 -13   9 291.304 19.4502   1
   6 -13   9 11.5257 2.05687   1
   7 -13   9 212.790 10.6447   1
   8 -13   9 308.623 12.6818   1
   9 -13   9 28.9769 4.86301   1
  10 -13   9 0.51233 3.92916   1
 -11  -2   9 23.0519 25.4968  -2
  11 -13   9 23.0519 25.4968   1
 -12  -1   9 -18.378 17.5713  -2
  12 -13   9 -18.378 17.5713   1
  -4 -12   9 9.13455 3.96203   1
  -3 -12   9 8.02802 3.88835   1
  -2 -12   9 7.27281 3.00686   1
  -1 -12   9 3.72670 2.14110   1
   0 -12   9 54.0178 16.2925   1
   1 -12   9 282.298 18.2722   1
   2 -12   9 218.952 16.4376   1
   3 -12   9 11.4041 5.05595   1
   4 -12   9 383.405 21.2768   1
   5 -12   9 418.597 15.1356   1
   6 -12   9 2.58482 2.14169   1
   7 -12   9 -3.3713 2.03642   1
   8 -12   9 216.114 11.3149   1
  -9  -3   9 36.3598 16.6832  -2
   9 -12   9 36.3598 16.6832   1
 -10  -2   9 -26.544 18.7551  -2
  10 -12   9 -26.544 18.7551   1
 -11  -1   9 -29.375 22.5987  -2
  11 -12   9 -29.375 22.5987   1
 -12   0   9 37.1896 18.0081  -2
  12 -12   9 37.1896 18.0081   1
 -13   1   9 156.000 31.2612  -2
  13 -12   9 156.000 31.2612   1
  -5 -11   9 3.15818 3.85173   1
  -4 -11   9 5.12528 3.10109   1
  -3 -11   9 70.6454 9.26268   1
  -2 -11   9 141.401 10.2768   1
  -1 -11   9 29.6486 3.35651   1
   0 -11   9 226.705 8.33436   1
   1 -11   9 548.389 13.2032   1
   2 -11   9 504.357 15.1673   1
   3 -11   9 1.30601 1.76457   1
   4 -11   9 167.341 13.6654   1
   5 -11   9 330.600 13.0448   1
   6 -11   9 242.407 14.0355   1
  -7  -4   9 125.919 15.5022  -2
   7 -11   9 125.919 15.5022   1
  -8  -3   9 58.5005 15.7748  -2
   8 -11   9 58.5005 15.7748   1
  -9  -2   9 75.7375 15.3795  -2
   9 -11   9 75.7375 15.3795   1
 -10  -1   9 98.4723 16.7773  -2
  10 -11   9 98.4723 16.7773   1
 -11   0   9 -4.8357 19.5672  -2
  11 -11   9 -4.8357 19.5672   1
 -12   1   9 198.027 21.9505  -2
  12 -11   9 198.027 21.9505   1
 -13   2   9 197.972 33.3265  -2
  13 -11   9 197.972 33.3265   1
  -6 -10   9 0.26705 3.35299   1
  -5 -10   9 1.30415 2.95374   1
  -4 -10   9 108.854 9.97858   1
   3 -13   9 396.024 35.5134  -2
  -3 -10   9 396.024 35.5134   1
   2 -12   9 492.896 39.4252  -2
  -2 -10   9 492.896 39.4252   1
   1 -11   9 493.088 40.5489  -2
  -1 -10   9 493.088 40.5489   1
   0 -10   9 214.459 29.1482  -2
   0 -10   9 214.459 29.1482   1
  -1  -9   9 1120.24 56.4297  -2
   1 -10   9 1120.24 56.4297   1
  -2  -8   9 1192.72 59.4840  -2
   2 -10   9 1192.72 59.4840   1
   3 -10   9 159.663 8.94834   1
  -4  -6   9 29.8242 19.9723  -2
   4 -10   9 29.8242 19.9723   1
   5 -10   9 -1.5258 2.49766   1
  -6  -4   9 730.744 28.1576  -2
   6 -10   9 730.744 28.1576   1
  -7  -3   9 63.4390 9.77456  -2
   7 -10   9 63.4390 9.77456   1
  -8  -2   9 304.899 16.1925  -2
   8 -10   9 304.899 16.1925   1
  -9  -1   9 693.013 31.9368  -2
   9 -10   9 693.013 31.9368   1
 -10   0   9 261.674 21.3653  -2
  10 -10   9 261.674 21.3653   1
 -11   1   9 28.8938 19.1244  -2
  11 -10   9 28.8938 19.1244   1
 -12   2   9 308.874 24.8698  -2
  12 -10   9 308.874 24.8698   1
 -13   3   9 83.1838 26.4022  -2
  13 -10   9 83.1838 26.4022   1
  -7  -9   9 8.68011 3.75350   1
  -6  -9   9 58.2085 10.8504   1
  -5  -9   9 62.0259 8.58599   1
   4 -13   9 174.729 28.6106  -2
  -4  -9   9 174.729 28.6106   1
   3 -12   9 594.956 40.0205  -2
  -3  -9   9 594.956 40.0205   1
   2 -11   9 1158.83 57.7019  -2
  -2  -9   9 1158.83 57.7019   1
   1 -10   9 1035.55 55.6263  -2
  -1  -9   9 1035.55 55.6263   1
   0  -9   9 277.045 28.9330  -2
   0  -9   9 277.045 28.9330   1
  -1  -8   9 679.164 41.0517  -2
   1  -9   9 679.164 41.0517   1
  -2  -7   9 394.885 32.2714  -2
   2  -9   9 394.885 32.2714   1
  -3  -6   9 113.539 13.6067  -2
   3  -9   9 113.539 13.6067   1
  -4  -5   9 123.668 11.5516  -2
   4  -9   9 123.668 11.5516   1
  -5  -4   9 1256.26 34.6117  -2
   5  -9   9 1256.26 34.6117   1
  -6  -3   9 387.242 17.5815  -2
   6  -9   9 387.242 17.5815   1
  -7  -2   9 224.698 14.5789  -2
   7  -9   9 224.698 14.5789   1
  -8  -1   9 470.868 19.5328  -2
   8  -9   9 470.868 19.5328   1
  -9   0   9 912.370 37.4585  -2
   9  -9   9 912.370 37.4585   1
 -10   1   9 315.909 22.7512  -2
  10  -9   9 315.909 22.7512   1
 -11   2   9 38.2005 13.2453  -2
  11  -9   9 38.2005 13.2453   1
 -12   3   9 216.329 22.9266  -2
  12  -9   9 216.329 22.9266   1
 -13   4   9 89.0878 19.8319  -2
  13  -9   9 89.0878 19.8319   1
  -8  -8   9 -2.0802 5.78820   1
  -7  -8   9 69.8089 9.93199   1
  -6  -8   9 242.450 13.3179   1
  -5  -8   9 93.8140 9.17447   1
   4 -12   9 463.289 36.9571  -2
  -4  -8   9 463.289 36.9571   1
   3 -11   9 523.647 35.8802  -2
  -3  -8   9 523.647 35.8802   1
   2 -10   9 1174.61 56.4577  -2
  -2  -8   9 1174.61 56.4577   1
   1  -9   9 627.010 39.2739  -2
  -1  -8   9 627.010 39.2739   1
   0  -8   9 -5.0138 15.4387  -2
   0  -8   9 -5.0138 15.4387   1
  -1  -7   9 174.763 15.6582  -2
   1  -8   9 174.763 15.6582   1
  -2  -6   9 6.49718 10.2933  -2
   2  -8   9 6.49718 10.2933   1
  -3  -5   9 67.9167 10.6523  -2
   3  -8   9 67.9167 10.6523   1
  -4  -4   9 244.370 11.8638  -2
   4  -8   9 244.370 11.8638   1
  -5  -3   9 1650.20 41.3013  -2
   5  -8   9 1650.20 41.3013   1
  -6  -2   9 1575.61 34.2188  -2
   6  -8   9 1575.61 34.2188   1
  -7  -1   9 114.861 10.3183  -2
   7  -8   9 114.861 10.3183   1
  -8   0   9 374.757 15.9558  -2
   8  -8   9 374.757 15.9558   1
  -9   1   9 797.071 34.7507  -2
   9  -8   9 797.071 34.7507   1
 -10   2   9 753.070 35.6438  -2
  10  -8   9 753.070 35.6438   1
 -11   3   9 45.3664 14.9565  -2
  11  -8   9 45.3664 14.9565   1
  -9  -7   9 43.5883 8.37678   1
  -8  -7   9 -2.9419 3.66486   1
  -7  -7   9 136.048 11.0205   1
  -6  -7   9 451.625 20.4334   1
  -5  -7   9 244.845 14.2172   1
   4 -11   9 146.135 26.1230  -2
  -4  -7   9 146.135 26.1230   1
   3 -10   9 298.871 27.7837  -2
  -3  -7   9 298.871 27.7837   1
   2  -9   9 456.032 31.6049  -2
  -2  -7   9 456.032 31.6049   1
   1  -8   9 190.392 11.3756  -2
  -1  -7   9 190.392 11.3756   1
   0  -7   9 19.2820 7.98587  -2
   0  -7   9 19.2820 7.98587   1
  -1  -6   9 156.089 12.1701  -2
   1  -7   9 156.089 12.1701   1
  -2  -5   9 692.579 22.7592  -2
   2  -7   9 692.579 22.7592   1
  -3  -4   9 408.378 15.5483  -2
   3  -7   9 408.378 15.5483   1
  -4  -3   9 1113.35 33.9566  -2
   4  -7   9 1113.35 33.9566   1
  -5  -2   9 2079.63 48.7488  -2
   5  -7   9 2079.63 48.7488   1
  -6  -1   9 1422.64 37.1705  -2
   6  -7   9 1422.64 37.1705   1
  -7   0   9 272.519 12.3910  -2
   7  -7   9 272.519 12.3910   1
  -8   1   9 474.651 24.9154  -2
   8  -7   9 474.651 24.9154   1
  -9   2   9 608.044 30.7469  -2
   9  -7   9 608.044 30.7469   1
 -10   3   9 116.372 25.1252  -2
  10  -7   9 116.372 25.1252   1
 -11   4   9 100.942 27.2644  -2
  11  -7   9 100.942 27.2644   1
 -10  -6   9 265.686 19.4376   1
  -9  -6   9 256.268 17.9413   1
  -8  -6   9 4.52183 3.46893   1
  -7  -6   9 174.952 11.2262   1
  -6  -6   9 388.120 17.8398   1
  -5  -6   9 309.799 15.0532   1
   4 -10   9 12.8475 17.5520  -2
  -4  -6   9 12.8475 17.5520   1
   3  -9   9 123.013 18.8735  -2
  -3  -6   9 123.013 18.8735   1
   2  -8   9 8.35145 7.78054  -2
  -2  -6   9 8.35145 7.78054   1
   1  -7   9 129.200 9.78802  -2
  -1  -6   9 129.200 9.78802   1
   0  -6   9 -7.5641 5.90789  -2
   0  -6   9 -7.5641 5.90789   1
  -1  -5   9 1053.72 27.6059  -2
   1  -6   9 1053.72 27.6059   1
  -2  -4   9 1422.74 28.5606  -2
   2  -6   9 1422.74 28.5606   1
  -3  -3   9 37.6061 5.45604  -2
   3  -6   9 37.6061 5.45604   1
  -4  -2   9 718.145 20.4289  -2
   4  -6   9 718.145 20.4289   1
  -5  -1   9 2414.13 48.8910  -2
   5  -6   9 2414.13 48.8910   1
  -6   0   9 1539.17 34.5360  -2
   6  -6   9 1539.17 34.5360   1
  -7   1   9 294.698 19.3028  -2
   7  -6   9 294.698 19.3028   1
  -8   2   9 68.0258 19.7089  -2
   8  -6   9 68.0258 19.7089   1
  -9   3   9 138.766 26.9902  -2
   9  -6   9 138.766 26.9902   1
 -10   4   9 127.199 28.8171  -2
  10  -6   9 127.199 28.8171   1
 -11   5   9 -28.396 24.3806  -2
  11  -6   9 -28.396 24.3806   1
 -12   6   9 28.7136 30.7279  -2
  12  -6   9 28.7136 30.7279   1
 -13   7   9 46.7774 38.9540  -2
  13  -6   9 46.7774 38.9540   1
 -10  -5   9 203.190 18.1298   1
  -9  -5   9 339.925 19.0416   1
  -8  -5   9 166.738 13.4158   1
  -7  -5   9 0.90572 2.47806   1
   6 -11   9 889.618 45.1795  -2
  -6  -5   9 889.618 45.1795   1
   5 -10   9 -3.8138 6.17767  -2
  -5  -5   9 -3.8138 6.17767   1
   4  -9   9 132.703 9.56250  -2
  -4  -5   9 132.703 9.56250   1
   3  -8   9 53.4752 7.76338  -2
  -3  -5   9 53.4752 7.76338   1
   2  -7   9 678.604 17.9024  -2
  -2  -5   9 678.604 17.9024   1
   1  -6   9 985.757 22.5835  -2
  -1  -5   9 985.757 22.5835   1
   0  -5   9 22.0544 6.18151  -2
   0  -5   9 22.0544 6.18151   1
  -1  -4   9 811.474 22.4319  -2
   1  -5   9 811.474 22.4319   1
  -2  -3   9 791.302 18.6669  -2
   2  -5   9 791.302 18.6669   1
  -3  -2   9 943.313 24.2928  -2
   3  -5   9 943.313 24.2928   1
  -4  -1   9 394.541 14.2061  -2
   4  -5   9 394.541 14.2061   1
  -5   0   9 585.051 18.3138  -2
   5  -5   9 585.051 18.3138   1
  -6   1   9 397.973 15.3698  -2
   6  -5   9 397.973 15.3698   1
  -7   2   9 -4.0358 10.6031  -2
   7  -5   9 -4.0358 10.6031   1
  -9   4   9 32.0227 23.5846  -2
   9  -5   9 32.0227 23.5846   1
 -10   5   9 94.5237 29.8563  -2
  10  -5   9 94.5237 29.8563   1
  12  -5   9 43.4409 14.1169   1
  13  -5   9 174.704 37.1872   1
 -11  -4   9 1.48511 4.24652   1
 -10  -4   9 130.560 13.7402   1
  -9  -4   9 245.908 12.6194   1
   8 -12   9 168.925 14.4978  -2
  -8  -4   9 168.925 14.4978   1
   7 -11   9 118.349 9.95276  -2
  -7  -4   9 118.349 9.95276   1
   6 -10   9 740.464 19.4693  -2
  -6  -4   9 740.464 19.4693   1
   5  -9   9 1267.90 27.6680  -2
  -5  -4   9 1267.90 27.6680   1
   4  -8   9 247.535 11.2051  -2
  -4  -4   9 247.535 11.2051   1
   3  -7   9 375.522 11.9322  -2
  -3  -4   9 375.522 11.9322   1
   2  -6   9 1402.95 28.3302  -2
  -2  -4   9 1402.95 28.3302   1
   1  -5   9 779.968 21.1884  -2
  -1  -4   9 779.968 21.1884   1
   0  -4   9 128.359 8.15525  -2
   0  -4   9 128.359 8.15525   1
  -1  -3   9 1758.00 32.3349  -2
   1  -4   9 1758.00 32.3349   1
  -2  -2   9 2028.42 42.1580  -2
   2  -4   9 2028.42 42.1580   1
  -3  -1   9 198.051 10.0163  -2
   3  -4   9 198.051 10.0163   1
  -4   0   9 364.074 13.6409  -2
   4  -4   9 364.074 13.6409   1
  -5   1   9 297.243 13.2018  -2
   5  -4   9 297.243 13.2018   1
  -6   2   9 259.927 19.8445  -2
   6  -4   9 259.927 19.8445   1
  -7   3   9 14.5527 13.0035  -2
   7  -4   9 14.5527 13.0035   1
  -8   4   9 81.2892 16.0075  -2
   8  -4   9 81.2892 16.0075   1
  -9   5   9 111.868 17.6675  -2
   9  -4   9 111.868 17.6675   1
  10  -4   9 84.3911 25.8932   1
  11  -4   9 26.4488 10.7576   1
  12  -4   9 10.0422 10.7752   1
 -11  -3   9 -4.9521 3.43222   1
 -10  -3   9 36.6779 9.88770   1
   9 -12   9 33.1089 19.5602  -2
  -9  -3   9 33.1089 19.5602   1
   8 -11   9 22.1803 7.88190  -2
  -8  -3   9 22.1803 7.88190   1
   7 -10   9 69.0399 9.40193  -2
  -7  -3   9 69.0399 9.40193   1
   6  -9   9 443.089 12.8209  -2
  -6  -3   9 443.089 12.8209   1
   5  -8   9 1703.50 36.4641  -2
  -5  -3   9 1703.50 36.4641   1
   4  -7   9 998.486 21.5367  -2
  -4  -3   9 998.486 21.5367   1
   3  -6   9 47.0300 4.48853  -2
  -3  -3   9 47.0300 4.48853   1
   2  -5   9 761.557 16.4644  -2
  -2  -3   9 761.557 16.4644   1
   1  -4   9 1879.37 38.8328  -2
  -1  -3   9 1879.37 38.8328   1
   0  -3   9 248.707 10.5626  -2
   0  -3   9 248.707 10.5626   1
  -1  -2   9 1158.11 26.5925  -2
   1  -3   9 1158.11 26.5925   1
  -2  -1   9 226.291 10.8216  -2
   2  -3   9 226.291 10.8216   1
  -3   0   9 21.8496 5.85983  -2
   3  -3   9 21.8496 5.85983   1
  -4   1   9 5.19350 7.13438  -2
   4  -3   9 5.19350 7.13438   1
  -5   2   9 24.5311 12.2890  -2
   5  -3   9 24.5311 12.2890   1
  -6   3   9 48.5718 14.1735  -2
   6  -3   9 48.5718 14.1735   1
  -7   4   9 415.505 26.9601  -2
   7  -3   9 415.505 26.9601   1
   8  -3   9 14.2984 4.94994   1
   9  -3   9 238.279 21.5074   1
  10  -3   9 231.806 21.8561   1
  11  -3   9 15.9842 6.33546   1
  12  -3   9 -6.9644 9.00835   1
 -12  -2   9 11.1092 7.79549   1
  11 -13   9 6.43960 22.2790  -2
 -11  -2   9 6.43960 22.2790   1
  10 -12   9 -23.018 17.0851  -2
 -10  -2   9 -23.018 17.0851   1
   9 -11   9 116.705 21.5695  -2
  -9  -2   9 116.705 21.5695   1
   8 -10   9 291.759 13.9698  -2
  -8  -2   9 291.759 13.9698   1
   7  -9   9 219.229 11.1082  -2
  -7  -2   9 219.229 11.1082   1
   6  -8   9 1570.42 36.4070  -2
  -6  -2   9 1570.42 36.4070   1
   5  -7   9 2076.33 44.3306  -2
  -5  -2   9 2076.33 44.3306   1
   4  -6   9 659.469 28.2935  -2
  -4  -2   9 659.469 28.2935   1
   3  -5   9 805.477 16.9971  -2
  -3  -2   9 805.477 16.9971   1
   2  -4   9 2295.54 45.0488  -2
  -2  -2   9 2295.54 45.0488   1
   1  -3   9 1271.97 28.0818  -2
  -1  -2   9 1271.97 28.0818   1
   0  -2   9 106.541 6.89608  -2
   0  -2   9 106.541 6.89608   1
  -1  -1   9 204.290 12.5919  -2
   1  -2   9 204.290 12.5919   1
  -2   0   9 192.932 10.0365  -2
   2  -2   9 192.932 10.0365   1
  -3   1   9 116.899 10.3579  -2
   3  -2   9 116.899 10.3579   1
  -4   2   9 439.932 40.3569  -2
   4  -2   9 439.932 40.3569   1
  -5   3   9 263.005 27.5793  -2
   5  -2   9 263.005 27.5793   1
  -6   4   9 484.403 39.1430  -2
   6  -2   9 484.403 39.1430   1
   7  -2   9 395.974 25.7287   1
   8  -2   9 92.8431 16.0476   1
   9  -2   9 172.417 19.6770   1
  10  -2   9 257.788 30.9958   1
  11  -2   9 57.9922 11.2514   1
  12  -2   9 -8.9165 5.57269   1
  12 -13   9 -4.5861 23.1299  -2
 -12  -1   9 -4.5861 23.1299   1
  10 -11   9 91.9764 18.2403  -2
 -10  -1   9 91.9764 18.2403   1
   9 -10   9 754.106 22.6558  -2
  -9  -1   9 754.106 22.6558   1
   8  -9   9 479.485 27.3197  -2
  -8  -1   9 479.485 27.3197   1
   7  -8   9 83.4318 9.96105  -2
  -7  -1   9 83.4318 9.96105   1
   6  -7   9 1399.68 41.4321  -2
  -6  -1   9 1399.68 41.4321   1
   5  -6   9 2445.87 69.8316  -2
  -5  -1   9 2445.87 69.8316   1
   4  -5   9 402.764 19.8214  -2
  -4  -1   9 402.764 19.8214   1
   3  -4   9 181.931 5.88477  -2
  -3  -1   9 181.931 5.88477   1
   2  -3   9 227.355 11.5788  -2
  -2  -1   9 227.355 11.5788   1
   1  -2   9 263.101 9.63480  -2
  -1  -1   9 263.101 9.63480   1
   0  -1   9 10.0261 6.99520  -2
   0  -1   9 10.0261 6.99520   1
  -1   0   9 217.005 9.50056  -2
   1  -1   9 217.005 9.50056   1
  -2   1   9 1745.68 35.8071  -2
   2  -1   9 1745.68 35.8071   1
   3  -1   9 1322.55 29.9042   1
   4  -1   9 608.271 18.6114   1
   5  -1   9 3.60643 3.11714   1
   6  -1   9 367.788 24.5199   1
   7  -1   9 199.732 20.2722   1
   8  -1   9 6.10841 5.41966   1
   9  -1   9 -0.0764 5.67712   1
  10  -1   9 94.5579 18.8044   1
  11  -1   9 -3.4112 15.2767   1
 -13   0   9 23.9582 17.3667   1
  12 -12   9 -15.729 20.8484  -2
 -12   0   9 -15.729 20.8484   1
  10 -10   9 264.219 22.9192  -2
 -10   0   9 264.219 22.9192   1
   9  -9   9 889.796 23.4194  -2
  -9   0   9 889.796 23.4194   1
   8  -8   9 368.696 17.6441  -2
  -8   0   9 368.696 17.6441   1
   7  -7   9 321.861 28.9636  -2
  -7   0   9 321.861 28.9636   1
   6  -6   9 1401.34 45.8125  -2
  -6   0   9 1401.34 45.8125   1
   5  -5   9 553.097 23.5197  -2
  -5   0   9 553.097 23.5197   1
   4  -4   9 397.405 17.8508  -2
  -4   0   9 397.405 17.8508   1
   3  -3   9 28.2811 2.76605  -2
  -3   0   9 28.2811 2.76605   1
   2  -2   9 196.799 5.95282  -2
  -2   0   9 196.799 5.95282   1
   1  -1   9 226.697 11.1504  -2
  -1   0   9 226.697 11.1504   1
   0   0   9 263.870 13.4887  -2
   0   0   9 263.870 13.4887   1
  -1   1   9 1311.40 41.4084  -2
   1   0   9 1311.40 41.4084   1
   2   0   9 391.203 16.1737   1
   3   0   9 815.961 27.4836   1
   4   0   9 608.585 19.1018   1
   5   0   9 136.113 16.3412   1
   6   0   9 114.639 16.7407   1
   7   0   9 359.860 28.5185   1
   8   0   9 62.6379 12.8741   1
   9   0   9 -2.5818 8.09472   1
  10   0   9 1.82474 6.25469   1
  11   0   9 13.4268 9.02914   1
  13 -12   9 116.668 25.4096  -2
 -13   1   9 116.668 25.4096   1
  12 -11   9 205.278 23.8569  -2
 -12   1   9 205.278 23.8569   1
  11 -10   9 16.6590 31.5701  -2
 -11   1   9 16.6590 31.5701   1
  10  -9   9 330.669 23.6544  -2
 -10   1   9 330.669 23.6544   1
   9  -8   9 813.563 36.5599  -2
  -9   1   9 813.563 36.5599   1
   8  -7   9 515.392 20.3037  -2
  -8   1   9 515.392 20.3037   1
   7  -6   9 245.147 15.8045  -2
  -7   1   9 245.147 15.8045   1
   6  -5   9 351.353 42.0497  -2
  -6   1   9 351.353 42.0497   1
   5  -4   9 241.465 14.6464  -2
  -5   1   9 241.465 14.6464   1
   4  -3   9 -0.1462 19.7226  -2
  -4   1   9 -0.1462 19.7226   1
   3  -2   9 80.1986 6.80746  -2
  -3   1   9 80.1986 6.80746   1
   2  -1   9 1654.05 91.8988  -2
  -2   1   9 1654.05 91.8988   1
  -1   1   9 1065.80 26.8030   1
   0   1   9 712.224 17.3202   1
   1   1   9 67.9032 13.7221   1
   2   1   9 1414.43 30.0997   1
   3   1   9 1613.42 30.8978   1
   4   1   9 724.901 26.5718   1
   5   1   9 10.7697 4.19081   1
   6   1   9 462.715 21.7434   1
   7   1   9 2.05576 3.71467   1
   8   1   9 33.7500 7.78690   1
   9   1   9 5.29176 5.97823   1
  10   1   9 42.2343 10.1129   1
  13 -11   9 145.460 21.1131  -2
 -13   2   9 145.460 21.1131   1
  12 -10   9 314.235 25.5566  -2
 -12   2   9 314.235 25.5566   1
  11  -9   9 34.4193 28.6275  -2
 -11   2   9 34.4193 28.6275   1
  10  -8   9 714.280 35.5790  -2
 -10   2   9 714.280 35.5790   1
   9  -7   9 475.534 20.2786  -2
  -9   2   9 475.534 20.2786   1
   8  -6   9 61.9926 29.5455  -2
  -8   2   9 61.9926 29.5455   1
   7  -5   9 -20.120 9.65380  -2
  -7   2   9 -20.120 9.65380   1
   6  -4   9 221.152 24.9483  -2
  -6   2   9 221.152 24.9483   1
   5  -3   9 -19.074 25.3514  -2
  -5   2   9 -19.074 25.3514   1
   4  -2   9 359.980 14.3324  -2
  -4   2   9 359.980 14.3324   1
  -3   2   9 54.1173 3.66824   1
  -2   2   9 207.379 7.56953   1
  -1   2   9 1225.56 28.1991   1
   0   2   9 687.016 17.8334   1
   1   2   9 100.899 5.07108   1
   2   2   9 382.052 11.2130   1
   3   2   9 625.133 17.8346   1
   4   2   9 213.057 10.7286   1
   5   2   9 1.04350 2.58973   1
   6   2   9 -2.5730 3.20107   1
   7   2   9 0.64811 3.78733   1
   8   2   9 -3.3776 4.45216   1
   9   2   9 23.2828 8.47533   1
  13 -10   9 192.636 21.7593  -2
 -13   3   9 192.636 21.7593   1
  12  -9   9 288.611 25.1671  -2
 -12   3   9 288.611 25.1671   1
  11  -8   9 76.8431 16.8294  -2
 -11   3   9 76.8431 16.8294   1
  10  -7   9 105.232 18.0516  -2
 -10   3   9 105.232 18.0516   1
   9  -6   9 118.393 12.7055  -2
  -9   3   9 118.393 12.7055   1
   7  -4   9 11.0703 9.57876  -2
  -7   3   9 11.0703 9.57876   1
   6  -3   9 26.5224 19.6725  -2
  -6   3   9 26.5224 19.6725   1
   5  -2   9 302.440 13.3789  -2
  -5   3   9 302.440 13.3789   1
  -4   3   9 291.716 8.87177   1
  -3   3   9 169.207 7.43368   1
  -2   3   9 520.324 15.2646   1
  -1   3   9 733.818 18.0714   1
   0   3   9 575.303 16.1554   1
   1   3   9 8.08178 2.72415   1
   2   3   9 299.950 10.4207   1
   3   3   9 415.996 14.5214   1
   4   3   9 132.815 9.26822   1
   5   3   9 -2.3982 3.34045   1
   6   3   9 147.667 14.7594   1
   7   3   9 129.756 15.2112   1
   8   3   9 47.4965 7.71152   1
  13  -9   9 100.263 19.6251  -2
 -13   4   9 100.263 19.6251   1
  12  -8   9 73.9641 18.8735  -2
 -12   4   9 73.9641 18.8735   1
  11  -7   9 80.2139 18.2286  -2
 -11   4   9 80.2139 18.2286   1
  10  -6   9 141.487 19.5901  -2
 -10   4   9 141.487 19.5901   1
   9  -5   9 30.4475 16.2207  -2
  -9   4   9 30.4475 16.2207   1
   8  -4   9 126.604 37.2793  -2
  -8   4   9 126.604 37.2793   1
   7  -3   9 270.083 18.9242  -2
  -7   4   9 270.083 18.9242   1
  -6   4   9 0.07742 7.45720   1
  -5   4   9 311.444 13.3662   1
  -4   4   9 528.782 14.8366   1
  -3   4   9 13.5181 2.49057   1
  -2   4   9 100.049 6.47714   1
  -1   4   9 567.750 16.0788   1
   0   4   9 207.297 9.83164   1
   1   4   9 1.28970 2.10205   1
   2   4   9 8.56859 2.74445   1
   3   4   9 7.88800 2.81870   1
   4   4   9 14.6330 4.13296   1
   5   4   9 9.39185 4.40926   1
   6   4   9 173.896 18.2336   1
   7   4   9 84.2443 17.6595   1
   8   4   9 18.0101 6.08176   1
  13  -8   9 -33.787 33.3048  -2
 -13   5   9 -33.787 33.3048   1
  12  -7   9 17.3753 35.7019  -2
 -12   5   9 17.3753 35.7019   1
  11  -6   9 41.7269 17.1880  -2
 -11   5   9 41.7269 17.1880   1
  10  -5   9 74.9618 18.4519  -2
 -10   5   9 74.9618 18.4519   1
  -9   5   9 38.7596 4.78483   1
  -8   5   9 329.336 17.3180   1
  -7   5   9 285.616 10.0544   1
  -6   5   9 -2.6139 2.05717   1
  -5   5   9 -0.8356 2.39042   1
  -4   5   9 166.627 8.43538   1
  -3   5   9 55.9242 6.41944   1
  -2   5   9 35.5211 3.93888   1
  -1   5   9 128.735 8.66853   1
   0   5   9 -1.8886 2.24914   1
   1   5   9 38.9478 9.26472   1
   2   5   9 12.0528 5.19181   1
   3   5   9 75.9390 9.48880   1
   4   5   9 82.9514 7.35582   1
   5   5   9 -1.6534 4.47856   1
   6   5   9 131.597 16.7319   1
   7   5   9 240.589 19.8048   1
  13  -7   9 -5.0618 18.4073  -2
 -13   6   9 -5.0618 18.4073   1
  12  -6   9 160.927 43.9143  -2
 -12   6   9 160.927 43.9143   1
  11  -5   9 95.7624 20.7579  -2
 -11   6   9 95.7624 20.7579   1
 -10   6   9 18.1209 5.19713   1
  -9   6   9 30.7720 15.3825   1
  -8   6   9 132.898 8.20376   1
  -7   6   9 216.270 11.4001   1
  -6   6   9 425.736 18.7425   1
  -5   6   9 337.025 16.9145   1
  -4   6   9 223.655 10.7189   1
  -3   6   9 5.22992 2.44235   1
  -2   6   9 -1.2659 2.15750   1
  -1   6   9 -1.8065 3.52709   1
   0   6   9 52.9119 11.6522   1
   1   6   9 0.68918 4.07469   1
   2   6   9 2.88004 3.44435   1
   3   6   9 91.4982 12.5768   1
   4   6   9 40.5389 17.8986   1
   5   6   9 -3.2744 4.26135   1
   6   6   9 21.0352 6.78943   1
  13  -6   9 250.243 26.2980  -2
 -13   7   9 250.243 26.2980   1
 -12   7   9 238.837 21.5858   1
 -11   7   9 231.077 21.6874   1
 -10   7   9 31.9475 8.95539   1
  -9   7   9 47.5031 5.42828   1
  -8   7   9 388.138 13.3130   1
  -7   7   9 532.095 21.7809   1
  -6   7   9 134.381 11.0580   1
  -5   7   9 2.28822 2.43100   1
  -4   7   9 4.34990 3.42530   1
  -3   7   9 21.2136 5.37007   1
  -2   7   9 5.45374 4.12386   1
  -1   7   9 177.343 16.7104   1
   0   7   9 246.007 19.3291   1
   1   7   9 243.269 20.4940   1
   2   7   9 0.07527 3.38666   1
   3   7   9 103.142 18.9771   1
   4   7   9 157.824 23.5544   1
   5   7   9 -4.0482 7.44745   1
 -12   8   9 191.237 20.9760   1
 -11   8   9 357.285 11.6488   1
 -10   8   9 65.7579 5.97489   1
  -9   8   9 16.2657 3.75142   1
  -8   8   9 110.729 10.7249   1
  -7   8   9 6.47430 3.38445   1
  -6   8   9 8.62485 4.32148   1
  -5   8   9 -0.6642 3.32636   1
  -4   8   9 48.7082 9.03810   1
  -3   8   9 95.6995 13.1055   1
  -2   8   9 6.97701 5.05048   1
  -1   8   9 73.7958 12.9408   1
   0   8   9 341.353 24.0106   1
   1   8   9 222.603 21.2063   1
   2   8   9 73.8778 15.2226   1
   3   8   9 -0.1644 6.70864   1
 -11   9   9 163.325 10.3112   1
 -10   9   9 17.2289 2.94935   1
  -9   9   9 -2.9536 3.03996   1
  -8   9   9 8.14500 3.72783   1
  -7   9   9 -7.4019 9.16634   1
  -6   9   9 3.94945 4.16514   1
  -5   9   9 130.816 14.2010   1
  -4   9   9 292.270 19.5862   1
  -3   9   9 305.392 21.7227   1
  -2   9   9 46.1600 10.5823   1
  -1   9   9 14.3620 5.33477   1
   0   9   9 204.866 20.5151   1
   1   9   9 216.401 21.5697   1
   2   9   9 10.9330 6.33305   1
 -11  10   9 10.4910 11.3502   1
 -10  10   9 0.04745 2.82890   1
  -9  10   9 -2.5370 3.85111   1
  -8  10   9 10.0373 5.04551   1
  -7  10   9 95.3081 14.4582   1
  -6  10   9 4.21821 4.33038   1
  -5  10   9 29.7059 6.53413   1
  -4  10   9 226.482 19.4033   1
  -3  10   9 216.965 19.7687   1
  -2  10   9 34.9685 7.65893   1
  -1  10   9 -4.7546 5.14332   1
   0  10   9 23.8937 5.76122   1
  -9  11   9 14.0076 3.76206   1
  -8  11   9 99.0987 13.4386   1
  -7  11   9 202.790 18.0881   1
  -6  11   9 26.2337 6.82660   1
  -5  11   9 18.6624 6.89344   1
  -4  11   9 197.433 20.0915   1
  -3  11   9 88.6659 15.5081   1
   4 -16  10 -1.0956 4.74591   1
   5 -16  10 79.7686 23.2190   1
   6 -16  10 147.165 17.4614   1
   7 -16  10 9.00142 5.58202   1
  -9  -7  10 -23.052 29.5470  -2
   8 -16  10 -23.052 29.5470   1
   1 -15  10 -2.1049 4.39451   1
   2 -15  10 83.2877 14.5084   1
   3 -15  10 19.5843 6.43089   1
   4 -15  10 1.68520 4.09647   1
   5 -15  10 107.441 14.6114   1
   6 -15  10 147.183 16.5028   1
   7 -15  10 102.134 15.4591   1
  -9  -6  10 42.4917 30.7461  -2
   8 -15  10 42.4917 30.7461   1
 -10  -5  10 -17.382 29.7087  -2
   9 -15  10 -17.382 29.7087   1
  10 -15  10 54.0959 6.41458   1
  -1 -14  10 113.402 15.3495   1
   0 -14  10 147.662 16.0387   1
   1 -14  10 4.29823 4.43161   1
   2 -14  10 30.7770 6.93390   1
   3 -14  10 256.223 20.1596   1
   4 -14  10 29.4336 9.03742   1
   5 -14  10 2.23473 4.83047   1
   6 -14  10 -5.3993 3.98901   1
   7 -14  10 17.4512 2.79066   1
   8 -14  10 62.5290 8.36807   1
   9 -14  10 3.39415 2.69197   1
  10 -14  10 7.25281 3.75271   1
  11 -14  10 5.32748 4.84632   1
  -3 -13  10 3.85255 3.31824   1
  -2 -13  10 198.548 11.5482   1
  -1 -13  10 397.000 23.7118   1
   0 -13  10 338.699 20.8528   1
   1 -13  10 12.5957 4.62792   1
   2 -13  10 125.432 14.6404   1
   3 -13  10 102.842 13.0791   1
   4 -13  10 11.0702 4.44938   1
   5 -13  10 -0.3000 3.63808   1
   6 -13  10 10.6013 2.32532   1
   7 -13  10 62.5372 7.23659   1
   8 -13  10 120.604 9.83915   1
   9 -13  10 -2.0355 3.29164   1
 -10  -3  10 46.3890 23.2179  -2
  10 -13  10 46.3890 23.2179   1
 -11  -2  10 284.678 25.1501  -2
  11 -13  10 284.678 25.1501   1
 -12  -1  10 -8.9484 17.8817  -2
  12 -13  10 -8.9484 17.8817   1
  -4 -12  10 143.855 12.1806   1
  -3 -12  10 0.56789 2.84394   1
  -2 -12  10 179.093 11.4684   1
  -1 -12  10 774.493 18.3619   1
   0 -12  10 496.597 12.9311   1
   1 -12  10 162.406 7.91781   1
   2 -12  10 -0.3122 3.32466   1
   3 -12  10 37.2287 4.92115   1
   4 -12  10 22.3192 3.94770   1
   5 -12  10 61.1071 7.28618   1
   6 -12  10 162.566 11.5677   1
   7 -12  10 159.780 12.8432   1
   8 -12  10 170.447 19.1818   1
  -9  -3  10 141.514 17.7823  -2
   9 -12  10 141.514 17.7823   1
 -10  -2  10 146.472 25.5496  -2
  10 -12  10 146.472 25.5496   1
 -11  -1  10 349.392 26.7819  -2
  11 -12  10 349.392 26.7819   1
 -12   0  10 36.3762 17.2923  -2
  12 -12  10 36.3762 17.2923   1
  -5 -11  10 404.710 20.0536   1
  -4 -11  10 280.730 18.4111   1
  -3 -11  10 -3.3560 3.03645   1
   2 -13  10 305.087 34.2603  -2
  -2 -11  10 305.087 34.2603   1
  -1 -11  10 920.169 24.9521   1
   0 -11  10 970.860 56.0270  -2
   0 -11  10 970.860 56.0270   1
  -1 -10  10 284.130 33.9132  -2
   1 -11  10 284.130 33.9132   1
   2 -11  10 1.39305 2.27387   1
   3 -11  10 5.14833 2.28592   1
  -4  -7  10 142.485 27.4823  -2
   4 -11  10 142.485 27.4823   1
   5 -11  10 87.3894 10.2018   1
  -6  -5  10 317.221 33.8234  -2
   6 -11  10 317.221 33.8234   1
  -7  -4  10 1468.29 45.9067  -2
   7 -11  10 1468.29 45.9067   1
  -8  -3  10 818.919 32.4988  -2
   8 -11  10 818.919 32.4988   1
  -9  -2  10 46.0689 23.6682  -2
   9 -11  10 46.0689 23.6682   1
 -10  -1  10 291.259 31.4001  -2
  10 -11  10 291.259 31.4001   1
 -11   0  10 301.812 24.7097  -2
  11 -11  10 301.812 24.7097   1
 -12   1  10 50.7156 16.8500  -2
  12 -11  10 50.7156 16.8500   1
 -13   2  10 -3.0075 20.0713  -2
  13 -11  10 -3.0075 20.0713   1
  -6 -10  10 99.0614 11.2046   1
  -5 -10  10 281.462 17.8657   1
  -4 -10  10 339.273 20.2514   1
   3 -13  10 66.7492 26.8224  -2
  -3 -10  10 66.7492 26.8224   1
   2 -12  10 36.3045 24.0781  -2
  -2 -10  10 36.3045 24.0781   1
   1 -11  10 260.658 31.0857  -2
  -1 -10  10 260.658 31.0857   1
   0 -10  10 232.859 30.8028  -2
   0 -10  10 232.859 30.8028   1
  -1  -9  10 340.147 33.0488  -2
   1 -10  10 340.147 33.0488   1
  -2  -8  10 420.255 35.6070  -2
   2 -10  10 420.255 35.6070   1
  -3  -7  10 678.990 43.8777  -2
   3 -10  10 678.990 43.8777   1
  -4  -6  10 713.198 45.3206  -2
   4 -10  10 713.198 45.3206   1
  -5  -5  10 45.7422 20.3747  -2
   5 -10  10 45.7422 20.3747   1
  -6  -4  10 203.914 16.5306  -2
   6 -10  10 203.914 16.5306   1
  -7  -3  10 1337.49 50.0654  -2
   7 -10  10 1337.49 50.0654   1
  -8  -2  10 652.911 24.7377  -2
   8 -10  10 652.911 24.7377   1
  -9  -1  10 154.298 17.6326  -2
   9 -10  10 154.298 17.6326   1
 -10   0  10 71.2239 14.5581  -2
  10 -10  10 71.2239 14.5581   1
 -11   1  10 98.7764 22.5836  -2
  11 -10  10 98.7764 22.5836   1
 -12   2  10 18.8822 19.3813  -2
  12 -10  10 18.8822 19.3813   1
 -13   3  10 -32.256 21.3148  -2
  13 -10  10 -32.256 21.3148   1
  -7  -9  10 -4.2872 3.20730   1
  -6  -9  10 33.6613 5.41188   1
  -5  -9  10 203.061 12.2745   1
   4 -13  10 352.984 32.3835  -2
  -4  -9  10 352.984 32.3835   1
   3 -12  10 15.3721 22.9884  -2
  -3  -9  10 15.3721 22.9884   1
   2 -11  10 20.6314 21.4357  -2
  -2  -9  10 20.6314 21.4357   1
   1 -10  10 261.889 30.9815  -2
  -1  -9  10 261.889 30.9815   1
   0  -9  10 71.3727 22.3112  -2
   0  -9  10 71.3727 22.3112   1
  -1  -8  10 27.1704 18.3595  -2
   1  -9  10 27.1704 18.3595   1
  -2  -7  10 312.769 19.0549  -2
   2  -9  10 312.769 19.0549   1
  -3  -6  10 1144.15 56.4809  -2
   3  -9  10 1144.15 56.4809   1
  -4  -5  10 1362.09 41.3727  -2
   4  -9  10 1362.09 41.3727   1
  -5  -4  10 38.2370 9.82307  -2
   5  -9  10 38.2370 9.82307   1
  -6  -3  10 936.402 39.0819  -2
   6  -9  10 936.402 39.0819   1
  -7  -2  10 3086.97 68.6064  -2
   7  -9  10 3086.97 68.6064   1
  -8  -1  10 907.104 29.0780  -2
   8  -9  10 907.104 29.0780   1
  -9   0  10 48.1699 12.6380  -2
   9  -9  10 48.1699 12.6380   1
 -10   1  10 24.5199 11.3956  -2
  10  -9  10 24.5199 11.3956   1
 -11   2  10 -5.7654 18.3909  -2
  11  -9  10 -5.7654 18.3909   1
 -12   3  10 -15.721 20.0166  -2
  12  -9  10 -15.721 20.0166   1
 -13   4  10 14.0873 17.9760  -2
  13  -9  10 14.0873 17.9760   1
  -8  -8  10 78.5605 12.9350   1
  -7  -8  10 -0.6103 3.79369   1
  -6  -8  10 22.7581 5.05712   1
  -5  -8  10 208.386 14.0393   1
   4 -12  10 83.2275 23.3480  -2
  -4  -8  10 83.2275 23.3480   1
   3 -11  10 19.4919 19.8195  -2
  -3  -8  10 19.4919 19.8195   1
   2 -10  10 293.593 31.8268  -2
  -2  -8  10 293.593 31.8268   1
   1  -9  10 10.9105 18.3308  -2
  -1  -8  10 10.9105 18.3308   1
   0  -8  10 35.9065 17.9876  -2
   0  -8  10 35.9065 17.9876   1
  -1  -7  10 52.8312 18.0990  -2
   1  -8  10 52.8312 18.0990   1
  -2  -6  10 616.984 19.3191  -2
   2  -8  10 616.984 19.3191   1
  -3  -5  10 2482.29 48.8461  -2
   3  -8  10 2482.29 48.8461   1
  -4  -4  10 1535.05 40.0514  -2
   4  -8  10 1535.05 40.0514   1
  -5  -3  10 163.075 12.7099  -2
   5  -8  10 163.075 12.7099   1
  -6  -2  10 562.740 27.9052  -2
   6  -8  10 562.740 27.9052   1
  -7  -1  10 837.234 23.1037  -2
   7  -8  10 837.234 23.1037   1
  -8   0  10 254.377 18.4215  -2
   8  -8  10 254.377 18.4215   1
  -9   1  10 147.898 16.8261  -2
   9  -8  10 147.898 16.8261   1
 -10   2  10 225.498 21.2850  -2
  10  -8  10 225.498 21.2850   1
 -11   3  10 264.704 34.4963  -2
  11  -8  10 264.704 34.4963   1
 -12   4  10 128.598 29.7937  -2
  12  -8  10 128.598 29.7937   1
 -13   5  10 53.6124 30.7557  -2
  13  -8  10 53.6124 30.7557   1
  -9  -7  10 -3.6550 3.91870   1
  -8  -7  10 18.7518 5.22413   1
  -7  -7  10 0.38569 2.64751   1
  -6  -7  10 63.0845 8.16584   1
  -5  -7  10 2.30583 3.09619   1
   4 -11  10 86.7484 23.7053  -2
  -4  -7  10 86.7484 23.7053   1
   3 -10  10 528.125 37.1048  -2
  -3  -7  10 528.125 37.1048   1
   2  -9  10 321.146 16.9905  -2
  -2  -7  10 321.146 16.9905   1
   1  -8  10 63.9740 8.49752  -2
  -1  -7  10 63.9740 8.49752   1
   0  -7  10 354.819 13.7656  -2
   0  -7  10 354.819 13.7656   1
  -1  -6  10 54.3403 15.6276  -2
   1  -7  10 54.3403 15.6276   1
  -2  -5  10 394.598 16.0048  -2
   2  -7  10 394.598 16.0048   1
  -3  -4  10 1723.26 38.9177  -2
   3  -7  10 1723.26 38.9177   1
  -4  -3  10 1430.95 41.4553  -2
   4  -7  10 1430.95 41.4553   1
  -5  -2  10 60.2138 9.96438  -2
   5  -7  10 60.2138 9.96438   1
  -6  -1  10 665.141 20.6062  -2
   6  -7  10 665.141 20.6062   1
  -7   0  10 312.246 13.5681  -2
   7  -7  10 312.246 13.5681   1
  -8   1  10 299.236 21.1502  -2
   8  -7  10 299.236 21.1502   1
  -9   2  10 124.361 17.7115  -2
   9  -7  10 124.361 17.7115   1
 -10   3  10 572.577 46.7560  -2
  10  -7  10 572.577 46.7560   1
 -12   5  10 130.115 35.5250  -2
  12  -7  10 130.115 35.5250   1
 -10  -6  10 10.3105 4.68496   1
  -9  -6  10 -0.9356 3.57629   1
  -8  -6  10 22.0375 4.90394   1
  -7  -6  10 136.153 11.7844   1
  -6  -6  10 113.475 9.08019   1
  -5  -6  10 64.5819 8.35027   1
   4 -10  10 623.361 23.2740  -2
  -4  -6  10 623.361 23.2740   1
   3  -9  10 1074.10 32.3092  -2
  -3  -6  10 1074.10 32.3092   1
   2  -8  10 580.111 17.5347  -2
  -2  -6  10 580.111 17.5347   1
   1  -7  10 88.2189 8.63690  -2
  -1  -6  10 88.2189 8.63690   1
   0  -6  10 833.638 26.4399  -2
   0  -6  10 833.638 26.4399   1
  -1  -5  10 -2.7080 8.12654  -2
   1  -6  10 -2.7080 8.12654   1
  -2  -4  10 512.972 15.0117  -2
   2  -6  10 512.972 15.0117   1
  -3  -3  10 1266.09 30.9079  -2
   3  -6  10 1266.09 30.9079   1
  -4  -2  10 56.2278 6.16314  -2
   4  -6  10 56.2278 6.16314   1
  -5  -1  10 68.7978 7.46922  -2
   5  -6  10 68.7978 7.46922   1
  -6   0  10 121.577 8.41992  -2
   6  -6  10 121.577 8.41992   1
  -7   1  10 65.8762 11.1260  -2
   7  -6  10 65.8762 11.1260   1
  -8   2  10 75.1063 11.3912  -2
   8  -6  10 75.1063 11.3912   1
  -9   3  10 630.325 46.5004  -2
   9  -6  10 630.325 46.5004   1
 -10   4  10 889.572 59.6645  -2
  10  -6  10 889.572 59.6645   1
 -12   6  10 285.535 44.8677  -2
  12  -6  10 285.535 44.8677   1
  13  -6  10 4.46756 10.7197   1
  10 -15  10 32.0611 17.7836  -2
 -10  -5  10 32.0611 17.7836   1
  -9  -5  10 -6.2011 3.04460   1
  -8  -5  10 256.006 18.0219   1
   7 -12  10 855.669 37.1639  -2
  -7  -5  10 855.669 37.1639   1
   6 -11  10 447.371 19.2973  -2
  -6  -5  10 447.371 19.2973   1
   5 -10  10 39.1887 8.50775  -2
  -5  -5  10 39.1887 8.50775   1
   4  -9  10 1434.41 35.4727  -2
  -4  -5  10 1434.41 35.4727   1
   3  -8  10 2483.46 54.5641  -2
  -3  -5  10 2483.46 54.5641   1
   2  -7  10 406.564 14.4044  -2
  -2  -5  10 406.564 14.4044   1
   1  -6  10 16.3926 5.04247  -2
  -1  -5  10 16.3926 5.04247   1
   0  -5  10 976.362 27.7520  -2
   0  -5  10 976.362 27.7520   1
  -1  -4  10 471.989 16.5506  -2
   1  -5  10 471.989 16.5506   1
  -2  -3  10 240.906 9.73550  -2
   2  -5  10 240.906 9.73550   1
  -3  -2  10 193.946 10.4321  -2
   3  -5  10 193.946 10.4321   1
  -4  -1  10 22.0632 7.60519  -2
   4  -5  10 22.0632 7.60519   1
  -5   0  10 187.560 13.3793  -2
   5  -5  10 187.560 13.3793   1
  -6   1  10 360.952 18.5274  -2
   6  -5  10 360.952 18.5274   1
  -7   2  10 165.207 17.6703  -2
   7  -5  10 165.207 17.6703   1
  -8   3  10 98.0667 16.7634  -2
   8  -5  10 98.0667 16.7634   1
  -9   4  10 409.156 23.7254  -2
   9  -5  10 409.156 23.7254   1
 -10   5  10 958.236 63.9654  -2
  10  -5  10 958.236 63.9654   1
  11  -5  10 337.333 41.6387   1
  12  -5  10 136.779 33.7708   1
 -11  -4  10 2.06069 4.40014   1
 -10  -4  10 -2.6914 4.23064   1
  -9  -4  10 87.7574 28.6262   1
   8 -12  10 1455.71 41.2758  -2
  -8  -4  10 1455.71 41.2758   1
   7 -11  10 1471.36 32.1388  -2
  -7  -4  10 1471.36 32.1388   1
   6 -10  10 244.537 13.0001  -2
  -6  -4  10 244.537 13.0001   1
   5  -9  10 4.93062 8.46221  -2
  -5  -4  10 4.93062 8.46221   1
   4  -8  10 1449.85 34.9902  -2
  -4  -4  10 1449.85 34.9902   1
   3  -7  10 1796.24 33.0876  -2
  -3  -4  10 1796.24 33.0876   1
   2  -6  10 632.435 16.1657  -2
  -2  -4  10 632.435 16.1657   1
   1  -5  10 429.782 15.8312  -2
  -1  -4  10 429.782 15.8312   1
   0  -4  10 7.75518 3.11456  -2
   0  -4  10 7.75518 3.11456   1
  -1  -3  10 299.059 12.0101  -2
   1  -4  10 299.059 12.0101   1
  -2  -2  10 158.964 9.53294  -2
   2  -4  10 158.964 9.53294   1
  -3  -1  10 274.389 14.6906  -2
   3  -4  10 274.389 14.6906   1
  -4   0  10 758.430 22.0801  -2
   4  -4  10 758.430 22.0801   1
  -5   1  10 561.499 19.0933  -2
   5  -4  10 561.499 19.0933   1
  -6   2  10 203.642 18.7406  -2
   6  -4  10 203.642 18.7406   1
  -7   3  10 315.002 24.4468  -2
   7  -4  10 315.002 24.4468   1
  -8   4  10 352.414 26.4763  -2
   8  -4  10 352.414 26.4763   1
  -9   5  10 648.627 33.3183  -2
   9  -4  10 648.627 33.3183   1
  10  -4  10 76.9885 21.2628   1
  11  -4  10 40.5226 13.1290   1
  12  -4  10 48.4605 14.9527   1
  11 -14  10 3.22823 24.7569  -2
 -11  -3  10 3.22823 24.7569   1
 -10  -3  10 -0.9977 3.88863   1
   9 -12  10 202.041 26.1545  -2
  -9  -3  10 202.041 26.1545   1
   8 -11  10 1008.87 28.7185  -2
  -8  -3  10 1008.87 28.7185   1
   7 -10  10 1435.31 35.5547  -2
  -7  -3  10 1435.31 35.5547   1
   6  -9  10 991.842 32.3220  -2
  -6  -3  10 991.842 32.3220   1
   5  -8  10 176.802 9.54430  -2
  -5  -3  10 176.802 9.54430   1
   4  -7  10 1339.83 26.0276  -2
  -4  -3  10 1339.83 26.0276   1
   3  -6  10 1232.94 24.9338  -2
  -3  -3  10 1232.94 24.9338   1
   2  -5  10 230.006 8.09248  -2
  -2  -3  10 230.006 8.09248   1
   1  -4  10 310.786 12.0026  -2
  -1  -3  10 310.786 12.0026   1
   0  -3  10 2217.25 44.5595  -2
   0  -3  10 2217.25 44.5595   1
  -1  -2  10 909.018 28.6514  -2
   1  -3  10 909.018 28.6514   1
  -2  -1  10 1067.74 26.6898  -2
   2  -3  10 1067.74 26.6898   1
  -3   0  10 413.251 18.2269  -2
   3  -3  10 413.251 18.2269   1
  -4   1  10 1774.39 39.2173  -2
   4  -3  10 1774.39 39.2173   1
  -5   2  10 906.220 62.3595  -2
   5  -3  10 906.220 62.3595   1
  -6   3  10 354.802 24.7224  -2
   6  -3  10 354.802 24.7224   1
  -7   4  10 17.5805 21.9925  -2
   7  -3  10 17.5805 21.9925   1
   8  -3  10 228.091 21.9205   1
   9  -3  10 8.92072 5.84188   1
  10  -3  10 -5.1780 6.51741   1
  11  -3  10 33.6914 8.56082   1
  12  -3  10 -7.8014 8.15754   1
 -12  -2  10 73.8640 17.1453   1
  11 -13  10 263.810 32.3543  -2
 -11  -2  10 263.810 32.3543   1
   9 -11  10 96.4092 18.1760  -2
  -9  -2  10 96.4092 18.1760   1
   8 -10  10 830.901 38.9198  -2
  -8  -2  10 830.901 38.9198   1
   7  -9  10 3373.54 98.1138  -2
  -7  -2  10 3373.54 98.1138   1
   6  -8  10 636.269 30.8799  -2
  -6  -2  10 636.269 30.8799   1
   5  -7  10 69.8680 12.3797  -2
  -5  -2  10 69.8680 12.3797   1
   4  -6  10 60.1736 6.83819  -2
  -4  -2  10 60.1736 6.83819   1
   3  -5  10 164.917 6.29539  -2
  -3  -2  10 164.917 6.29539   1
   2  -4  10 115.313 7.95267  -2
  -2  -2  10 115.313 7.95267   1
   1  -3  10 850.075 21.4032  -2
  -1  -2  10 850.075 21.4032   1
   0  -2  10 4469.93 79.5260  -2
   0  -2  10 4469.93 79.5260   1
  -1  -1  10 3168.46 72.5274  -2
   1  -2  10 3168.46 72.5274   1
  -2   0  10 1189.02 34.2634  -2
   2  -2  10 1189.02 34.2634   1
  -3   1  10 1375.90 37.6779  -2
   3  -2  10 1375.90 37.6779   1
   4  -2  10 536.951 20.2549   1
   5  -2  10 1187.30 73.5280   1
   6  -2  10 -0.0729 3.91014   1
   7  -2  10 0.83654 5.94546   1
   8  -2  10 11.8448 6.57535   1
   9  -2  10 -6.5840 7.07562   1
  10  -2  10 -6.4402 5.00125   1
  11  -2  10 7.30800 11.2701   1
  12 -13  10 3.40146 22.7559  -2
 -12  -1  10 3.40146 22.7559   1
  11 -12  10 347.484 33.9179  -2
 -11  -1  10 347.484 33.9179   1
  10 -11  10 244.433 22.9010  -2
 -10  -1  10 244.433 22.9010   1
   9 -10  10 121.665 17.9735  -2
  -9  -1  10 121.665 17.9735   1
   8  -9  10 944.381 40.3810  -2
  -8  -1  10 944.381 40.3810   1
   7  -8  10 774.741 34.8581  -2
  -7  -1  10 774.741 34.8581   1
   6  -7  10 640.403 28.8055  -2
  -6  -1  10 640.403 28.8055   1
   5  -6  10 62.2093 9.11700  -2
  -5  -1  10 62.2093 9.11700   1
   4  -5  10 30.6216 7.09063  -2
  -4  -1  10 30.6216 7.09063   1
   3  -4  10 333.501 8.93413  -2
  -3  -1  10 333.501 8.93413   1
   2  -3  10 809.598 17.3111  -2
  -2  -1  10 809.598 17.3111   1
   1  -2  10 2468.93 46.2910  -2
  -1  -1  10 2468.93 46.2910   1
   0  -1  10 2831.61 52.6499  -2
   0  -1  10 2831.61 52.6499   1
  -1   0  10 3077.68 56.8826  -2
   1  -1  10 3077.68 56.8826   1
  -2   1  10 1079.78 30.6342  -2
   2  -1  10 1079.78 30.6342   1
   3  -1  10 15.8565 3.00076   1
   4  -1  10 196.478 12.6020   1
   5  -1  10 110.714 15.8435   1
   6  -1  10 63.1652 14.5968   1
   7  -1  10 3.91263 5.86814   1
   8  -1  10 24.0128 7.80126   1
   9  -1  10 191.697 43.2828   1
  10  -1  10 38.5910 9.15105   1
  11  -1  10 -0.9019 7.05913   1
  12 -12  10 -12.321 18.9376  -2
 -12   0  10 -12.321 18.9376   1
  11 -11  10 318.139 26.8142  -2
 -11   0  10 318.139 26.8142   1
  10 -10  10 77.5594 15.4706  -2
 -10   0  10 77.5594 15.4706   1
   9  -9  10 38.4221 13.6814  -2
  -9   0  10 38.4221 13.6814   1
   8  -8  10 273.834 15.2717  -2
  -8   0  10 273.834 15.2717   1
   7  -7  10 280.211 41.7392  -2
  -7   0  10 280.211 41.7392   1
   6  -6  10 104.312 12.2668  -2
  -6   0  10 104.312 12.2668   1
   5  -5  10 142.241 22.4122  -2
  -5   0  10 142.241 22.4122   1
   4  -4  10 736.051 26.8205  -2
  -4   0  10 736.051 26.8205   1
   3  -3  10 510.653 15.8535  -2
  -3   0  10 510.653 15.8535   1
   2  -2  10 1174.88 26.2886  -2
  -2   0  10 1174.88 26.2886   1
   1  -1  10 2515.74 66.0802  -2
  -1   0  10 2515.74 66.0802   1
   0   0  10 2273.39 51.7528  -2
   0   0  10 2273.39 51.7528   1
  -1   1  10 4148.54 128.024  -2
   1   0  10 4148.54 128.024   1
   2   0  10 517.578 15.2701   1
   3   0  10 77.1859 7.76610   1
   4   0  10 10.7943 5.13637   1
   5   0  10 790.629 41.9425   1
   6   0  10 11.8425 5.64497   1
   7   0  10 648.048 36.2247   1
   8   0  10 432.993 31.0672   1
   9   0  10 391.263 31.2700   1
  10   0  10 35.0314 9.56897   1
  12 -11  10 33.8777 16.5337  -2
 -12   1  10 33.8777 16.5337   1
  11 -10  10 109.088 36.2442  -2
 -11   1  10 109.088 36.2442   1
  10  -9  10 32.0791 13.1118  -2
 -10   1  10 32.0791 13.1118   1
   9  -8  10 174.193 19.0869  -2
  -9   1  10 174.193 19.0869   1
   8  -7  10 239.452 19.4733  -2
  -8   1  10 239.452 19.4733   1
   7  -6  10 11.1155 12.0872  -2
  -7   1  10 11.1155 12.0872   1
   6  -5  10 278.899 39.3923  -2
  -6   1  10 278.899 39.3923   1
   5  -4  10 389.903 32.3078  -2
  -5   1  10 389.903 32.3078   1
   4  -3  10 1610.44 67.1032  -2
  -4   1  10 1610.44 67.1032   1
   3  -2  10 1504.02 41.7792  -2
  -3   1  10 1504.02 41.7792   1
  -2   1  10 79.8094 6.22969   1
  -1   1  10 513.791 18.0143   1
   0   1  10 766.428 24.4129   1
   1   1  10 1075.13 20.6890   1
   2   1  10 264.284 11.2766   1
   3   1  10 66.5070 7.30525   1
   4   1  10 3.50351 2.74750   1
   5   1  10 234.636 15.8063   1
   6   1  10 169.378 15.1277   1
   7   1  10 29.5784 8.09943   1
   8   1  10 430.586 49.4445   1
   9   1  10 488.374 35.3794   1
  13 -11  10 -23.677 29.8349  -2
 -13   2  10 -23.677 29.8349   1
  12 -10  10 -9.4858 13.5433  -2
 -12   2  10 -9.4858 13.5433   1
  11  -9  10 7.54837 26.6460  -2
 -11   2  10 7.54837 26.6460   1
  10  -8  10 215.838 21.5641  -2
 -10   2  10 215.838 21.5641   1
   9  -7  10 106.897 12.7776  -2
  -9   2  10 106.897 12.7776   1
   8  -6  10 46.6841 13.5516  -2
  -8   2  10 46.6841 13.5516   1
   7  -5  10 138.332 16.3910  -2
  -7   2  10 138.332 16.3910   1
   6  -4  10 264.815 15.8161  -2
  -6   2  10 264.815 15.8161   1
   5  -3  10 699.250 59.5404  -2
  -5   2  10 699.250 59.5404   1
   4  -2  10 774.344 62.6353  -2
  -4   2  10 774.344 62.6353   1
  -3   2  10 468.392 15.9036   1
  -2   2  10 292.468 10.3564   1
  -1   2  10 133.802 6.99635   1
   0   2  10 370.319 12.5476   1
   1   2  10 335.830 15.8209   1
   2   2  10 8.22308 2.13793   1
   3   2  10 22.4233 3.94190   1
   4   2  10 119.477 9.04295   1
   5   2  10 129.147 9.79346   1
   6   2  10 162.481 14.7997   1
   7   2  10 8.92686 5.09155   1
   8   2  10 548.068 27.2221   1
   9   2  10 457.760 35.3740   1
  13 -10  10 20.7657 29.1786  -2
 -13   3  10 20.7657 29.1786   1
  12  -9  10 -32.021 27.0995  -2
 -12   3  10 -32.021 27.0995   1
  11  -8  10 279.102 47.3397  -2
 -11   3  10 279.102 47.3397   1
  10  -7  10 615.063 34.1607  -2
 -10   3  10 615.063 34.1607   1
   9  -6  10 742.197 37.3272  -2
  -9   3  10 742.197 37.3272   1
   8  -5  10 59.5850 14.3323  -2
  -8   3  10 59.5850 14.3323   1
   7  -4  10 218.337 16.6969  -2
  -7   3  10 218.337 16.6969   1
   6  -3  10 402.560 50.3183  -2
  -6   3  10 402.560 50.3183   1
  -5   3  10 -0.5511 7.59835   1
  -4   3  10 75.6383 4.77274   1
  -3   3  10 29.0845 4.04780   1
  -2   3  10 1.06399 1.39976   1
  -1   3  10 85.5698 6.77066   1
   0   3  10 158.926 8.79180   1
   1   3  10 22.1737 4.21246   1
   2   3  10 21.5864 4.34894   1
   3   3  10 -0.7417 2.68957   1
   4   3  10 53.1747 6.27205   1
   5   3  10 278.440 14.0525   1
   6   3  10 85.2819 13.5608   1
   7   3  10 3.42782 5.27093   1
   8   3  10 41.1490 8.19399   1
  13  -9  10 53.5747 19.8309  -2
 -13   4  10 53.5747 19.8309   1
  12  -8  10 82.4877 19.1018  -2
 -12   4  10 82.4877 19.1018   1
  11  -7  10 502.846 59.9591  -2
 -11   4  10 502.846 59.9591   1
  10  -6  10 1051.75 45.9096  -2
 -10   4  10 1051.75 45.9096   1
   9  -5  10 367.647 23.0185  -2
  -9   4  10 367.647 23.0185   1
  -8   4  10 88.9055 10.3335   1
  -7   4  10 -4.3178 2.40435   1
  -6   4  10 210.383 35.6850   1
  -5   4  10 99.3611 7.53222   1
  -4   4  10 105.259 6.17322   1
  -3   4  10 24.9245 3.63354   1
  -2   4  10 175.058 9.35987   1
  -1   4  10 59.9968 7.20499   1
   0   4  10 5.69795 2.82147   1
   1   4  10 111.794 13.8531   1
   2   4  10 215.350 18.3944   1
   3   4  10 -1.1684 2.89204   1
   4   4  10 1.76483 3.98593   1
   5   4  10 229.540 14.8666   1
   6   4  10 18.7118 5.31097   1
   7   4  10 -2.3927 4.51473   1
  13  -8  10 145.216 24.9635  -2
 -13   5  10 145.216 24.9635   1
  12  -7  10 141.592 21.5663  -2
 -12   5  10 141.592 21.5663   1
  11  -6  10 412.620 56.0279  -2
 -11   5  10 412.620 56.0279   1
  10  -5  10 1146.40 48.0594  -2
 -10   5  10 1146.40 48.0594   1
  -9   5  10 625.563 62.4496   1
  -8   5  10 230.275 40.0676   1
  -7   5  10 7.21645 10.3420   1
  -6   5  10 -4.1651 2.10080   1
  -5   5  10 89.0261 8.88518   1
  -4   5  10 -2.9913 2.56685   1
  -3   5  10 159.352 9.12451   1
  -2   5  10 646.078 21.1341   1
  -1   5  10 287.491 17.9010   1
   0   5  10 100.885 12.8179   1
   1   5  10 261.310 19.2235   1
   2   5  10 139.257 16.1804   1
   3   5  10 38.6537 6.74842   1
   4   5  10 8.86514 4.29614   1
   5   5  10 21.2831 6.11022   1
   6   5  10 28.8285 6.81187   1
  12  -6  10 254.484 25.7593  -2
 -12   6  10 254.484 25.7593   1
  11  -5  10 276.954 49.7851  -2
 -11   6  10 276.954 49.7851   1
 -10   6  10 525.718 30.6928   1
  -9   6  10 509.642 56.8858   1
  -8   6  10 83.1941 28.9258   1
  -7   6  10 21.8171 5.38497   1
  -6   6  10 1.63197 2.93678   1
  -5   6  10 13.4637 2.94369   1
  -4   6  10 81.9385 7.47309   1
  -3   6  10 248.423 16.8996   1
  -2   6  10 831.305 33.5135   1
  -1   6  10 378.171 22.2789   1
   0   6  10 193.622 17.8125   1
   1   6  10 -2.4449 4.03788   1
   2   6  10 100.362 15.6876   1
   3   6  10 13.7653 4.41941   1
   4   6  10 -5.6916 5.05331   1
   5   6  10 -2.7708 6.32333   1
 -12   7  10 -2.1825 5.07882   1
 -11   7  10 88.2689 33.1861   1
 -10   7  10 84.3966 10.4501   1
  -9   7  10 -2.4522 3.56286   1
  -8   7  10 -2.3372 2.34606   1
  -7   7  10 134.145 10.9922   1
  -6   7  10 740.798 28.3014   1
  -5   7  10 360.993 14.4027   1
  -4   7  10 15.4631 6.15897   1
  -3   7  10 265.537 18.3781   1
  -2   7  10 547.381 27.7846   1
  -1   7  10 830.521 36.5380   1
   0   7  10 83.2194 12.8627   1
   1   7  10 9.27845 5.45747   1
   2   7  10 2.41667 4.33225   1
   3   7  10 -0.0755 4.76543   1
   4   7  10 -3.9664 5.63368   1
 -11   8  10 10.7909 4.98209   1
 -10   8  10 0.39158 1.95641   1
  -9   8  10 -2.2596 2.61208   1
  -8   8  10 5.88030 2.77531   1
  -7   8  10 311.803 17.2383   1
  -6   8  10 282.895 16.9307   1
  -5   8  10 406.608 16.5074   1
  -4   8  10 67.2073 11.5965   1
  -3   8  10 127.072 15.0458   1
  -2   8  10 416.465 25.5447   1
  -1   8  10 353.516 23.9949   1
   0   8  10 39.2381 10.4825   1
   1   8  10 42.8799 16.4462   1
   2   8  10 10.2758 6.91490   1
 -11   9  10 -4.6622 4.23346   1
 -10   9  10 3.38610 2.53547   1
  -9   9  10 10.5249 3.96645   1
  -8   9  10 3.09430 3.19850   1
  -7   9  10 27.3611 15.6611   1
  -6   9  10 397.725 25.3107   1
  -5   9  10 311.270 21.1650   1
  -4   9  10 20.4312 6.32153   1
  -3   9  10 47.4991 11.0645   1
  -2   9  10 114.523 15.8179   1
  -1   9  10 68.8437 13.6136   1
   0   9  10 1.71603 5.39482   1
   1   9  10 18.0113 7.13203   1
  -9  10  10 19.6313 6.58708   1
  -8  10  10 8.17908 11.3351   1
  -7  10  10 47.2174 10.2369   1
  -6  10  10 166.234 16.4992   1
  -5  10  10 124.736 14.8744   1
  -4  10  10 8.21834 6.00085   1
  -3  10  10 3.58671 5.12406   1
  -2  10  10 -8.2771 4.40468   1
   4 -16  11 370.196 24.8607   1
   5 -16  11 226.800 20.3801   1
   6 -16  11 14.5400 5.75345   1
   7 -16  11 -3.7326 4.58934   1
   1 -15  11 160.337 17.0551   1
   2 -15  11 20.3707 6.44456   1
   3 -15  11 117.159 16.0299   1
   4 -15  11 264.428 20.8477   1
   5 -15  11 192.623 18.1351   1
   6 -15  11 87.4516 14.4538   1
   7 -15  11 90.8469 14.3185   1
   8 -15  11 111.480 9.36669   1
 -10  -5  11 92.9074 35.7275  -2
   9 -15  11 92.9074 35.7275   1
  -1 -14  11 15.4504 5.73028   1
   0 -14  11 185.392 17.4377   1
   1 -14  11 114.758 15.2219   1
   2 -14  11 -2.8864 3.96402   1
   3 -14  11 7.53104 4.94295   1
   4 -14  11 44.4191 8.29199   1
   5 -14  11 4.61272 4.63465   1
   6 -14  11 0.95947 4.59629   1
   7 -14  11 20.8377 6.20729   1
   8 -14  11 226.270 13.1993   1
   9 -14  11 160.756 15.0032   1
  10 -14  11 0.97057 4.19805   1
  11 -14  11 263.656 22.2358   1
  -3 -13  11 57.5748 7.62098   1
   2 -15  11 14.4245 31.5286  -2
  -2 -13  11 14.4245 31.5286   1
   1 -14  11 99.2690 35.8429  -2
  -1 -13  11 99.2690 35.8429   1
   0 -13  11 22.2256 5.75201   1
   1 -13  11 15.0945 6.02892   1
   2 -13  11 1.27275 3.40253   1
   3 -13  11 20.1734 5.43117   1
   4 -13  11 3.98702 1.86820   1
   5 -13  11 44.0737 5.43625   1
   6 -13  11 15.9423 5.25602   1
   7 -13  11 81.1573 19.9572   1
   8 -13  11 899.289 38.5952   1
   9 -13  11 304.523 20.8949   1
 -10  -3  11 -9.1715 24.0631  -2
  10 -13  11 -9.1715 24.0631   1
 -11  -2  11 102.251 19.9452  -2
  11 -13  11 102.251 19.9452   1
  -4 -12  11 -0.5277 3.59159   1
   3 -15  11 60.0962 30.4722  -2
  -3 -12  11 60.0962 30.4722   1
   2 -14  11 8.62850 27.8624  -2
  -2 -12  11 8.62850 27.8624   1
  -1 -12  11 3.63448 2.17863   1
   0 -12  11 3.08768 1.69938   1
  -1 -11  11 78.5003 28.5843  -2
   1 -12  11 78.5003 28.5843   1
   2 -12  11 85.7427 9.61753   1
   3 -12  11 10.6363 2.64480   1
   4 -12  11 16.2408 2.91521   1
   5 -12  11 17.3303 3.05703   1
   6 -12  11 4.36391 3.14512   1
   7 -12  11 276.350 23.5285   1
  -8  -4  11 479.629 25.0590  -2
   8 -12  11 479.629 25.0590   1
 -11  -1  11 45.4584 17.2883  -2
  11 -12  11 45.4584 17.2883   1
 -12   0  11 18.7820 25.0811  -2
  12 -12  11 18.7820 25.0811   1
  -5 -11  11 111.022 13.8762   1
   4 -15  11 154.699 34.7808  -2
  -4 -11  11 154.699 34.7808   1
  -3 -11  11 -0.4334 2.95073   1
  -2 -11  11 104.553 10.7766   1
   1 -12  11 77.3859 26.2076  -2
  -1 -11  11 77.3859 26.2076   1
   0 -11  11 169.053 30.0354  -2
   0 -11  11 169.053 30.0354   1
  -1 -10  11 446.038 40.0895  -2
   1 -11  11 446.038 40.0895   1
   2 -11  11 700.602 21.2707   1
  -3  -8  11 1288.18 66.9846  -2
   3 -11  11 1288.18 66.9846   1
  -4  -7  11 164.721 29.6135  -2
   4 -11  11 164.721 29.6135   1
  -5  -6  11 435.721 39.0532  -2
   5 -11  11 435.721 39.0532   1
  -6  -5  11 883.382 33.2977  -2
   6 -11  11 883.382 33.2977   1
  -7  -4  11 36.7930 21.6343  -2
   7 -11  11 36.7930 21.6343   1
  -8  -3  11 169.261 29.0760  -2
   8 -11  11 169.261 29.0760   1
  -9  -2  11 82.5827 25.0006  -2
   9 -11  11 82.5827 25.0006   1
 -10  -1  11 -19.865 18.5418  -2
  10 -11  11 -19.865 18.5418   1
 -11   0  11 21.5128 15.1669  -2
  11 -11  11 21.5128 15.1669   1
 -12   1  11 1.75236 19.4033  -2
  12 -11  11 1.75236 19.4033   1
  -6 -10  11 141.034 12.0703   1
  -5 -10  11 75.5366 9.90881   1
  -4 -10  11 43.3619 6.39737   1
   3 -13  11 168.987 28.2323  -2
  -3 -10  11 168.987 28.2323   1
   2 -12  11 181.157 29.8472  -2
  -2 -10  11 181.157 29.8472   1
   1 -11  11 361.479 36.1395  -2
  -1 -10  11 361.479 36.1395   1
   0 -10  11 -19.278 21.3735  -2
   0 -10  11 -19.278 21.3735   1
  -1  -9  11 1212.73 61.4647  -2
   1 -10  11 1212.73 61.4647   1
  -2  -8  11 2576.30 102.305  -2
   2 -10  11 2576.30 102.305   1
  -3  -7  11 1589.15 48.4967  -2
   3 -10  11 1589.15 48.4967   1
  -4  -6  11 77.7760 12.5878  -2
   4 -10  11 77.7760 12.5878   1
  -5  -5  11 108.947 14.0505  -2
   5 -10  11 108.947 14.0505   1
  -6  -4  11 91.6717 17.9060  -2
   6 -10  11 91.6717 17.9060   1
  -7  -3  11 27.7193 11.3190  -2
   7 -10  11 27.7193 11.3190   1
  -8  -2  11 -13.624 16.9680  -2
   8 -10  11 -13.624 16.9680   1
  -9  -1  11 83.0410 14.9511  -2
   9 -10  11 83.0410 14.9511   1
 -10   0  11 206.358 25.9977  -2
  10 -10  11 206.358 25.9977   1
 -11   1  11 29.0846 12.8145  -2
  11 -10  11 29.0846 12.8145   1
 -12   2  11 -1.0239 19.1671  -2
  12 -10  11 -1.0239 19.1671   1
  -7  -9  11 2.04657 3.33700   1
  -6  -9  11 7.35736 3.56410   1
  -5  -9  11 3.40087 3.12993   1
   4 -13  11 254.105 30.2684  -2
  -4  -9  11 254.105 30.2684   1
   3 -12  11 473.335 37.1517  -2
  -3  -9  11 473.335 37.1517   1
   2 -11  11 2006.31 83.6199  -2
  -2  -9  11 2006.31 83.6199   1
   1 -10  11 1236.02 61.3190  -2
  -1  -9  11 1236.02 61.3190   1
   0  -9  11 13.0971 20.3855  -2
   0  -9  11 13.0971 20.3855   1
  -1  -8  11 1497.44 44.7929  -2
   1  -9  11 1497.44 44.7929   1
  -2  -7  11 2504.26 65.3997  -2
   2  -9  11 2504.26 65.3997   1
  -3  -6  11 805.989 27.5318  -2
   3  -9  11 805.989 27.5318   1
  -4  -5  11 88.1281 12.6143  -2
   4  -9  11 88.1281 12.6143   1
  -5  -4  11 250.339 16.0879  -2
   5  -9  11 250.339 16.0879   1
  -6  -3  11 41.4439 13.8715  -2
   6  -9  11 41.4439 13.8715   1
  -7  -2  11 12.2697 11.9107  -2
   7  -9  11 12.2697 11.9107   1
  -8  -1  11 189.960 13.5304  -2
   8  -9  11 189.960 13.5304   1
  -9   0  11 586.482 29.6335  -2
   9  -9  11 586.482 29.6335   1
 -10   1  11 280.462 22.1990  -2
  10  -9  11 280.462 22.1990   1
 -11   2  11 161.904 20.6136  -2
  11  -9  11 161.904 20.6136   1
 -12   3  11 90.4218 19.7740  -2
  12  -9  11 90.4218 19.7740   1
  -8  -8  11 -7.1485 3.80951   1
  -7  -8  11 6.67028 3.69923   1
  -6  -8  11 2.82115 3.49860   1
  -5  -8  11 -0.3129 2.86765   1
   4 -12  11 28.0820 21.0868  -2
  -4  -8  11 28.0820 21.0868   1
   3 -11  11 1358.28 62.4778  -2
  -3  -8  11 1358.28 62.4778   1
   2 -10  11 2638.28 66.4368  -2
  -2  -8  11 2638.28 66.4368   1
   1  -9  11 1398.50 63.9792  -2
  -1  -8  11 1398.50 63.9792   1
   0  -8  11 -4.2166 17.1399  -2
   0  -8  11 -4.2166 17.1399   1
  -1  -7  11 901.991 47.7469  -2
   1  -8  11 901.991 47.7469   1
  -2  -6  11 1184.19 37.6461  -2
   2  -8  11 1184.19 37.6461   1
  -3  -5  11 679.925 24.5156  -2
   3  -8  11 679.925 24.5156   1
  -4  -4  11 370.484 16.3181  -2
   4  -8  11 370.484 16.3181   1
  -5  -3  11 602.153 26.1106  -2
   5  -8  11 602.153 26.1106   1
  -6  -2  11 943.702 29.7703  -2
   6  -8  11 943.702 29.7703   1
  -7  -1  11 339.486 15.1582  -2
   7  -8  11 339.486 15.1582   1
  -8   0  11 325.919 14.1856  -2
   8  -8  11 325.919 14.1856   1
  -9   1  11 853.027 37.5131  -2
   9  -8  11 853.027 37.5131   1
 -10   2  11 647.521 34.5834  -2
  10  -8  11 647.521 34.5834   1
 -12   4  11 -10.122 25.1851  -2
  12  -8  11 -10.122 25.1851   1
  -9  -7  11 -7.2360 4.14595   1
  -8  -7  11 -5.0116 5.01146   1
  -7  -7  11 3.02794 3.26178   1
  -6  -7  11 344.769 17.6305   1
  -5  -7  11 293.234 15.2912   1
   4 -11  11 219.651 25.3649  -2
  -4  -7  11 219.651 25.3649   1
   3 -10  11 1720.79 46.6850  -2
  -3  -7  11 1720.79 46.6850   1
   2  -9  11 2516.13 62.4250  -2
  -2  -7  11 2516.13 62.4250   1
   1  -8  11 924.679 27.9201  -2
  -1  -7  11 924.679 27.9201   1
   0  -7  11 4.35947 9.63631  -2
   0  -7  11 4.35947 9.63631   1
  -1  -6  11 292.323 16.0399  -2
   1  -7  11 292.323 16.0399   1
  -2  -5  11 362.244 16.9620  -2
   2  -7  11 362.244 16.9620   1
  -3  -4  11 157.971 9.49306  -2
   3  -7  11 157.971 9.49306   1
  -4  -3  11 614.593 25.6678  -2
   4  -7  11 614.593 25.6678   1
  -5  -2  11 1494.84 36.0085  -2
   5  -7  11 1494.84 36.0085   1
  -6  -1  11 1459.87 35.6180  -2
   6  -7  11 1459.87 35.6180   1
  -7   0  11 165.135 11.2259  -2
   7  -7  11 165.135 11.2259   1
  -8   1  11 580.436 23.5501  -2
   8  -7  11 580.436 23.5501   1
  -9   2  11 1013.94 42.2266  -2
   9  -7  11 1013.94 42.2266   1
 -10   3  11 743.029 37.9820  -2
  10  -7  11 743.029 37.9820   1
  -9  -6  11 52.0740 8.97547   1
  -8  -6  11 -1.6864 4.07185   1
  -7  -6  11 82.8380 9.82523   1
   6 -12  11 35.4743 13.3661  -2
  -6  -6  11 35.4743 13.3661   1
   5 -11  11 337.352 17.1459  -2
  -5  -6  11 337.352 17.1459   1
   4 -10  11 100.840 11.1262  -2
  -4  -6  11 100.840 11.1262   1
   3  -9  11 840.344 27.3001  -2
  -3  -6  11 840.344 27.3001   1
   2  -8  11 1104.17 26.3825  -2
  -2  -6  11 1104.17 26.3825   1
   1  -7  11 290.050 14.0421  -2
  -1  -6  11 290.050 14.0421   1
   0  -6  11 47.5569 11.2721  -2
   0  -6  11 47.5569 11.2721   1
  -1  -5  11 195.855 17.1678  -2
   1  -6  11 195.855 17.1678   1
  -2  -4  11 221.749 11.7032  -2
   2  -6  11 221.749 11.7032   1
  -3  -3  11 65.9634 9.80707  -2
   3  -6  11 65.9634 9.80707   1
  -4  -2  11 1094.36 34.8201  -2
   4  -6  11 1094.36 34.8201   1
  -5  -1  11 2467.97 51.7430  -2
   5  -6  11 2467.97 51.7430   1
  -6   0  11 2673.36 65.9646  -2
   6  -6  11 2673.36 65.9646   1
  -7   1  11 690.611 27.0556  -2
   7  -6  11 690.611 27.0556   1
  -8   2  11 365.540 19.2136  -2
   8  -6  11 365.540 19.2136   1
  -9   3  11 746.058 28.2650  -2
   9  -6  11 746.058 28.2650   1
 -10   4  11 368.611 42.3599  -2
  10  -6  11 368.611 42.3599   1
 -11   5  11 119.620 33.9763  -2
  11  -6  11 119.620 33.9763   1
  12  -6  11 19.9887 11.2309   1
 -10  -5  11 82.9817 12.5050   1
  -9  -5  11 323.822 17.5671   1
  -8  -5  11 164.641 12.7813   1
   7 -12  11 252.160 15.5696  -2
  -7  -5  11 252.160 15.5696   1
   6 -11  11 1137.62 33.3536  -2
  -6  -5  11 1137.62 33.3536   1
   5 -10  11 162.786 13.4313  -2
  -5  -5  11 162.786 13.4313   1
   4  -9  11 61.4377 8.89981  -2
  -4  -5  11 61.4377 8.89981   1
   3  -8  11 575.608 19.8655  -2
  -3  -5  11 575.608 19.8655   1
   2  -7  11 359.597 14.5849  -2
  -2  -5  11 359.597 14.5849   1
   1  -6  11 175.678 8.52958  -2
  -1  -5  11 175.678 8.52958   1
   0  -5  11 47.5816 7.57678  -2
   0  -5  11 47.5816 7.57678   1
  -1  -4  11 108.575 7.69558  -2
   1  -5  11 108.575 7.69558   1
  -2  -3  11 764.018 22.0806  -2
   2  -5  11 764.018 22.0806   1
  -3  -2  11 218.144 14.2630  -2
   3  -5  11 218.144 14.2630   1
  -4  -1  11 1254.57 31.1778  -2
   4  -5  11 1254.57 31.1778   1
  -5   0  11 2783.69 89.8760  -2
   5  -5  11 2783.69 89.8760   1
  -6   1  11 1853.09 60.7965  -2
   6  -5  11 1853.09 60.7965   1
  -7   2  11 318.506 19.5740  -2
   7  -5  11 318.506 19.5740   1
  -8   3  11 135.042 18.8120  -2
   8  -5  11 135.042 18.8120   1
  -9   4  11 42.4483 17.7970  -2
   9  -5  11 42.4483 17.7970   1
  10  -5  11 83.9910 25.0818   1
  11  -5  11 28.5833 11.1986   1
  12  -5  11 108.724 32.4893   1
 -10  -4  11 12.6589 8.52234   1
   9 -13  11 468.863 25.9899  -2
  -9  -4  11 468.863 25.9899   1
   8 -12  11 486.137 20.4394  -2
  -8  -4  11 486.137 20.4394   1
   7 -11  11 42.1849 9.44861  -2
  -7  -4  11 42.1849 9.44861   1
   6 -10  11 133.346 10.4137  -2
  -6  -4  11 133.346 10.4137   1
   5  -9  11 252.105 13.4821  -2
  -5  -4  11 252.105 13.4821   1
   4  -8  11 395.888 14.7104  -2
  -4  -4  11 395.888 14.7104   1
   3  -7  11 162.510 9.26352  -2
  -3  -4  11 162.510 9.26352   1
   2  -6  11 226.206 8.96292  -2
  -2  -4  11 226.206 8.96292   1
   1  -5  11 124.920 8.78284  -2
  -1  -4  11 124.920 8.78284   1
   0  -4  11 182.259 10.5543  -2
   0  -4  11 182.259 10.5543   1
  -1  -3  11 718.003 20.4288  -2
   1  -4  11 718.003 20.4288   1
  -2  -2  11 562.203 22.5919  -2
   2  -4  11 562.203 22.5919   1
  -3  -1  11 334.593 14.5372  -2
   3  -4  11 334.593 14.5372   1
  -4   0  11 1901.20 41.6628  -2
   4  -4  11 1901.20 41.6628   1
  -5   1  11 1452.58 82.7665  -2
   5  -4  11 1452.58 82.7665   1
  -6   2  11 913.485 39.5806  -2
   6  -4  11 913.485 39.5806   1
  -7   3  11 168.217 21.6979  -2
   7  -4  11 168.217 21.6979   1
  -8   4  11 5.41113 17.3403  -2
   8  -4  11 5.41113 17.3403   1
   9  -4  11 8.70080 5.72587   1
  10  -4  11 1.74389 5.34580   1
  11 -14  11 224.129 32.4279  -2
 -11  -3  11 224.129 32.4279   1
   9 -12  11 276.707 28.3489  -2
  -9  -3  11 276.707 28.3489   1
   8 -11  11 179.374 21.1541  -2
  -8  -3  11 179.374 21.1541   1
   7 -10  11 15.9198 15.1848  -2
  -7  -3  11 15.9198 15.1848   1
   6  -9  11 42.1610 7.32032  -2
  -6  -3  11 42.1610 7.32032   1
   5  -8  11 553.561 16.7845  -2
  -5  -3  11 553.561 16.7845   1
   4  -7  11 674.070 16.5064  -2
  -4  -3  11 674.070 16.5064   1
   3  -6  11 50.6888 4.33606  -2
  -3  -3  11 50.6888 4.33606   1
   2  -5  11 697.360 19.6697  -2
  -2  -3  11 697.360 19.6697   1
   1  -4  11 763.172 22.4477  -2
  -1  -3  11 763.172 22.4477   1
   0  -3  11 395.059 15.1784  -2
   0  -3  11 395.059 15.1784   1
  -1  -2  11 497.824 20.4941  -2
   1  -3  11 497.824 20.4941   1
  -2  -1  11 648.096 20.2915  -2
   2  -3  11 648.096 20.2915   1
  -3   0  11 848.820 24.1017  -2
   3  -3  11 848.820 24.1017   1
  -4   1  11 1010.76 32.1978  -2
   4  -3  11 1010.76 32.1978   1
  -5   2  11 512.102 47.4193  -2
   5  -3  11 512.102 47.4193   1
   6  -3  11 359.148 40.4242   1
   7  -3  11 227.119 21.9974   1
   8  -3  11 11.7381 5.71661   1
   9  -3  11 -2.5318 5.88238   1
  10  -3  11 113.965 19.7180   1
  11  -3  11 5.34519 7.69384   1
  11 -13  11 95.7195 25.2874  -2
 -11  -2  11 95.7195 25.2874   1
   9 -11  11 101.839 17.7201  -2
  -9  -2  11 101.839 17.7201   1
   8 -10  11 -11.088 12.4953  -2
  -8  -2  11 -11.088 12.4953   1
   7  -9  11 34.3079 33.5404  -2
  -7  -2  11 34.3079 33.5404   1
   6  -8  11 962.370 39.9005  -2
  -6  -2  11 962.370 39.9005   1
   5  -7  11 1724.91 42.2692  -2
  -5  -2  11 1724.91 42.2692   1
   4  -6  11 1118.22 30.1652  -2
  -4  -2  11 1118.22 30.1652   1
   3  -5  11 205.087 7.18213  -2
  -3  -2  11 205.087 7.18213   1
   2  -4  11 537.008 17.0015  -2
  -2  -2  11 537.008 17.0015   1
   1  -3  11 681.087 19.5345  -2
  -1  -2  11 681.087 19.5345   1
   0  -2  11 120.809 12.0991  -2
   0  -2  11 120.809 12.0991   1
  -1  -1  11 344.601 15.7270  -2
   1  -2  11 344.601 15.7270   1
  -2   0  11 70.3640 11.8719  -2
   2  -2  11 70.3640 11.8719   1
  -3   1  11 273.624 18.2927  -2
   3  -2  11 273.624 18.2927   1
   4  -2  11 80.4273 9.62260   1
   5  -2  11 664.148 34.6184   1
   6  -2  11 -2.6218 4.06539   1
   7  -2  11 16.4279 5.77382   1
   8  -2  11 232.860 23.4652   1
   9  -2  11 118.243 28.3921   1
  10  -2  11 120.078 21.5397   1
  11  -2  11 3.80205 7.22483   1
 -12  -1  11 143.774 49.0442   1
  11 -12  11 78.1545 20.7908  -2
 -11  -1  11 78.1545 20.7908   1
   9 -10  11 73.5325 17.1488  -2
  -9  -1  11 73.5325 17.1488   1
   8  -9  11 185.381 18.7081  -2
  -8  -1  11 185.381 18.7081   1
   7  -8  11 354.490 21.7151  -2
  -7  -1  11 354.490 21.7151   1
   6  -7  11 1459.02 50.0872  -2
  -6  -1  11 1459.02 50.0872   1
   5  -6  11 2139.80 65.1015  -2
  -5  -1  11 2139.80 65.1015   1
   4  -5  11 1383.75 93.3083  -2
  -4  -1  11 1383.75 93.3083   1
   3  -4  11 320.501 10.0881  -2
  -3  -1  11 320.501 10.0881   1
   2  -3  11 522.068 16.0471  -2
  -2  -1  11 522.068 16.0471   1
   1  -2  11 471.285 14.1935  -2
  -1  -1  11 471.285 14.1935   1
   0  -1  11 195.465 10.2104  -2
   0  -1  11 195.465 10.2104   1
  -1   0  11 58.5786 8.78024  -2
   1  -1  11 58.5786 8.78024   1
  -2   1  11 544.595 28.2342  -2
   2  -1  11 544.595 28.2342   1
   3  -1  11 326.519 14.5705   1
   4  -1  11 936.032 41.9724   1
   5  -1  11 -0.1477 4.65174   1
   6  -1  11 216.333 22.0651   1
   7  -1  11 406.558 29.6930   1
   8  -1  11 74.6785 22.8030   1
   9  -1  11 -6.8370 5.32556   1
  10  -1  11 35.3864 9.73821   1
  12 -12  11 0.49730 16.5172  -2
 -12   0  11 0.49730 16.5172   1
  11 -11  11 4.51432 14.8763  -2
 -11   0  11 4.51432 14.8763   1
  10 -10  11 146.010 40.7807  -2
 -10   0  11 146.010 40.7807   1
   9  -9  11 587.866 32.4087  -2
  -9   0  11 587.866 32.4087   1
   8  -8  11 306.986 22.1035  -2
  -8   0  11 306.986 22.1035   1
   7  -7  11 152.747 34.6959  -2
  -7   0  11 152.747 34.6959   1
   6  -6  11 2100.93 64.0145  -2
  -6   0  11 2100.93 64.0145   1
   5  -5  11 2885.71 151.778  -2
  -5   0  11 2885.71 151.778   1
   4  -4  11 2029.24 58.9229  -2
  -4   0  11 2029.24 58.9229   1
   3  -3  11 1070.52 28.5940  -2
  -3   0  11 1070.52 28.5940   1
   2  -2  11 67.2488 5.28356  -2
  -2   0  11 67.2488 5.28356   1
   1  -1  11 57.9658 27.2035  -2
  -1   0  11 57.9658 27.2035   1
   0   0  11 2.96765 1.45294   1
  -1   1  11 165.029 14.8786  -2
   1   0  11 165.029 14.8786   1
   2   0  11 150.270 9.18444   1
   3   0  11 693.670 29.7993   1
   4   0  11 332.254 24.9915   1
   5   0  11 688.326 36.8163   1
   6   0  11 -6.9064 4.29461   1
   7   0  11 533.356 34.5477   1
   8   0  11 60.0049 15.7893   1
   9   0  11 4.84991 6.80653   1
  10   0  11 -7.5165 11.0917   1
  12 -11  11 5.93766 14.8942  -2
 -12   1  11 5.93766 14.8942   1
  11 -10  11 25.7506 13.6997  -2
 -11   1  11 25.7506 13.6997   1
  10  -9  11 237.653 42.7147  -2
 -10   1  11 237.653 42.7147   1
   9  -8  11 799.425 37.9753  -2
  -9   1  11 799.425 37.9753   1
   8  -7  11 566.490 29.4525  -2
  -8   1  11 566.490 29.4525   1
   7  -6  11 510.127 26.7112  -2
  -7   1  11 510.127 26.7112   1
   6  -5  11 1565.88 49.6895  -2
  -6   1  11 1565.88 49.6895   1
   5  -4  11 1538.43 99.2487  -2
  -5   1  11 1538.43 99.2487   1
   4  -3  11 992.505 75.4181  -2
  -4   1  11 992.505 75.4181   1
   3  -2  11 293.909 13.0207  -2
  -3   1  11 293.909 13.0207   1
  -2   1  11 357.628 13.6201   1
  -1   1  11 160.708 8.55001   1
   0   1  11 -0.2577 1.96054   1
   1   1  11 6.97892 3.22000   1
   2   1  11 487.433 17.1077   1
   3   1  11 1215.21 44.9189   1
   4   1  11 1126.66 48.1802   1
   5   1  11 9.36195 5.93816   1
   6   1  11 106.617 18.0520   1
   7   1  11 77.2832 22.5046   1
   8   1  11 -8.4498 5.42884   1
   9   1  11 -9.1980 5.36289   1
  12 -10  11 27.2993 16.5817  -2
 -12   2  11 27.2993 16.5817   1
  11  -9  11 208.499 22.5146  -2
 -11   2  11 208.499 22.5146   1
  10  -8  11 630.419 64.9721  -2
 -10   2  11 630.419 64.9721   1
   9  -7  11 1002.14 32.0382  -2
  -9   2  11 1002.14 32.0382   1
   8  -6  11 390.431 23.8583  -2
  -8   2  11 390.431 23.8583   1
   7  -5  11 258.045 18.8176  -2
  -7   2  11 258.045 18.8176   1
   6  -4  11 691.981 27.0779  -2
  -6   2  11 691.981 27.0779   1
   5  -3  11 445.860 53.7880  -2
  -5   2  11 445.860 53.7880   1
  -4   2  11 120.881 6.49355   1
  -3   2  11 228.164 11.2102   1
  -2   2  11 47.2486 5.74717   1
  -1   2  11 351.543 13.1906   1
   0   2  11 262.586 11.9756   1
   1   2  11 16.4722 10.1728   1
   2   2  11 604.404 18.5423   1
   3   2  11 1481.44 36.5309   1
   4   2  11 647.622 19.9654   1
   5   2  11 117.681 10.1295   1
   6   2  11 -1.4767 3.43747   1
   7   2  11 111.046 20.2401   1
   8   2  11 11.8555 6.30702   1
  12  -9  11 93.2933 20.0107  -2
 -12   3  11 93.2933 20.0107   1
  11  -8  11 125.254 19.9330  -2
 -11   3  11 125.254 19.9330   1
  10  -7  11 615.396 63.4494  -2
 -10   3  11 615.396 63.4494   1
   9  -6  11 612.739 66.2457  -2
  -9   3  11 612.739 66.2457   1
   8  -5  11 157.836 16.9408  -2
  -8   3  11 157.836 16.9408   1
   7  -4  11 135.585 39.1688  -2
  -7   3  11 135.585 39.1688   1
  -6   3  11 0.76954 7.16331   1
  -5   3  11 216.549 37.0773   1
  -4   3  11 349.279 43.1652   1
  -3   3  11 3.16968 1.72527   1
  -2   3  11 208.381 9.85399   1
  -1   3  11 824.759 23.1822   1
   0   3  11 569.754 19.4366   1
   1   3  11 10.5095 4.10585   1
   2   3  11 222.683 18.4994   1
   3   3  11 761.263 35.0982   1
   4   3  11 648.919 20.4944   1
   5   3  11 69.2659 8.15330   1
   6   3  11 38.2719 7.57956   1
   7   3  11 21.5768 6.42412   1
  12  -8  11 18.1074 17.5118  -2
 -12   4  11 18.1074 17.5118   1
  11  -7  11 130.726 21.1128  -2
 -11   4  11 130.726 21.1128   1
  10  -6  11 286.504 49.2035  -2
 -10   4  11 286.504 49.2035   1
   9  -5  11 21.3055 37.9905  -2
  -9   4  11 21.3055 37.9905   1
  -8   4  11 -3.1526 8.35734   1
  -7   4  11 102.788 31.0017   1
  -6   4  11 126.944 31.6486   1
  -5   4  11 3.23058 2.29785   1
  -4   4  11 413.106 13.1106   1
  -3   4  11 85.8739 6.80532   1
  -2   4  11 133.640 8.96248   1
  -1   4  11 501.243 17.7959   1
   0   4  11 511.112 25.3161   1
   1   4  11 9.36639 5.18698   1
   2   4  11 95.8415 15.0225   1
   3   4  11 318.707 15.6658   1
   4   4  11 222.442 17.1024   1
   5   4  11 75.1843 14.5890   1
   6   4  11 31.1568 6.43056   1
  11  -6  11 70.8548 41.1627  -2
 -11   5  11 70.8548 41.1627   1
  10  -5  11 39.4570 41.2906  -2
 -10   5  11 39.4570 41.2906   1
  -9   5  11 -6.0221 8.77922   1
  -8   5  11 142.867 34.8542   1
  -7   5  11 209.541 38.9045   1
  -6   5  11 17.8671 4.86158   1
  -5   5  11 6.04315 3.12572   1
  -4   5  11 154.153 8.72990   1
  -3   5  11 2.21570 2.44392   1
  -2   5  11 101.582 13.0420   1
  -1   5  11 258.619 17.9896   1
   0   5  11 282.083 20.2608   1
   1   5  11 2.25664 4.12490   1
   2   5  11 57.5041 11.4198   1
   3   5  11 86.3227 10.9677   1
   4   5  11 22.2254 5.43070   1
   5   5  11 31.8049 8.52231   1
  12  -6  11 32.7385 23.6967  -2
 -12   6  11 32.7385 23.6967   1
 -11   6  11 15.5939 6.39722   1
 -10   6  11 30.8641 9.93062   1
  -8   6  11 57.0809 19.6579   1
  -7   6  11 79.1868 7.21913   1
  -6   6  11 289.182 14.6641   1
  -5   6  11 29.3718 5.30414   1
  -4   6  11 130.144 9.04320   1
  -3   6  11 15.1007 9.62621   1
  -2   6  11 10.2919 5.04226   1
  -1   6  11 47.2597 9.79173   1
   0   6  11 -3.8018 4.36042   1
   1   6  11 2.65051 4.52687   1
   2   6  11 14.8700 8.59245   1
   3   6  11 -5.1899 4.20594   1
   4   6  11 -2.5840 6.95188   1
 -11   7  11 203.486 22.3134   1
 -10   7  11 62.5891 10.7548   1
  -9   7  11 0.66027 11.0132   1
  -8   7  11 333.169 14.5993   1
  -7   7  11 301.618 15.2873   1
  -6   7  11 59.6463 8.72888   1
  -5   7  11 -4.8267 2.84217   1
  -4   7  11 -3.3459 2.58764   1
  -3   7  11 4.78117 4.02416   1
  -2   7  11 36.8914 9.07015   1
  -1   7  11 -0.4322 4.41233   1
   0   7  11 2.55268 5.19327   1
   1   7  11 15.4849 6.99847   1
   2   7  11 45.4262 11.6524   1
   3   7  11 17.6247 8.20408   1
 -11   8  11 188.268 14.0571   1
 -10   8  11 56.1111 15.0237   1
  -9   8  11 9.68113 11.4093   1
  -8   8  11 171.490 11.5923   1
  -7   8  11 342.597 18.4346   1
  -6   8  11 167.261 14.7292   1
  -5   8  11 34.2711 10.2529   1
  -4   8  11 58.6738 11.4418   1
  -3   8  11 79.2131 13.4291   1
  -2   8  11 2.08396 4.59476   1
  -1   8  11 6.23268 5.81040   1
   0   8  11 195.742 20.8909   1
   1   8  11 207.620 21.5084   1
 -10   9  11 143.096 40.1179   1
  -9   9  11 -7.6151 10.0003   1
  -8   9  11 38.3508 8.11657   1
  -7   9  11 60.5348 11.8757   1
  -6   9  11 29.0860 6.58449   1
  -5   9  11 42.5569 9.26202   1
  -4   9  11 224.601 19.1516   1
  -3   9  11 258.910 21.0440   1
  -2   9  11 53.0013 11.5875   1
  -1   9  11 1.18852 6.62368   1
  -7  10  11 -1.7672 4.33854   1
  -6  10  11 -1.6777 4.32389   1
  -5  10  11 57.3247 12.0436   1
  -4  10  11 320.391 22.9976   1
   2 -15  12 1.27208 5.33873   1
   3 -15  12 98.8619 15.3486   1
   4 -15  12 15.8097 6.16505   1
   5 -15  12 15.3185 6.28496   1
   6 -15  12 149.798 17.1150   1
   7 -15  12 153.068 10.2435   1
  -9  -6  12 69.6301 31.5855  -2
   8 -15  12 69.6301 31.5855   1
   9 -15  12 34.9062 8.61940   1
  -1 -14  12 -0.5547 5.10478   1
   0 -14  12 -0.5891 4.19485   1
   1 -14  12 5.07654 5.16388   1
   2 -14  12 132.079 15.2770   1
   3 -14  12 349.152 22.1220   1
   4 -14  12 95.4098 14.1119   1
   5 -14  12 -4.0593 3.81841   1
   6 -14  12 289.220 13.4278   1
   7 -14  12 350.602 16.0138   1
   8 -14  12 81.7515 21.8388   1
   9 -14  12 3.95469 7.12440   1
  10 -14  12 14.8725 5.26791   1
  -2 -13  12 -3.9301 2.77549   1
   1 -14  12 128.533 34.0059  -2
  -1 -13  12 128.533 34.0059   1
   0 -13  12 45.1656 6.27165   1
   1 -13  12 4.40012 6.06988   1
   2 -13  12 149.584 8.91140   1
   3 -13  12 315.540 14.7602   1
   4 -13  12 272.675 12.6188   1
   5 -13  12 71.4780 8.13585   1
   6 -13  12 141.167 11.4864   1
   7 -13  12 12.5989 3.89113   1
  -8  -5  12 61.4602 22.0368  -2
   8 -13  12 61.4602 22.0368   1
  -9  -4  12 34.2781 24.6323  -2
   9 -13  12 34.2781 24.6323   1
 -11  -2  12 50.0157 29.4482  -2
  11 -13  12 50.0157 29.4482   1
  -4 -12  12 27.4134 6.73638   1
   3 -15  12 57.8247 30.2206  -2
  -3 -12  12 57.8247 30.2206   1
   2 -14  12 86.6323 31.0648  -2
  -2 -12  12 86.6323 31.0648   1
  -1 -12  12 333.963 13.3760   1
   0 -12  12 250.814 10.8933   1
  -1 -11  12 405.332 40.4727  -2
   1 -12  12 405.332 40.4727   1
  -2 -10  12 66.5358 26.8666  -2
   2 -12  12 66.5358 26.8666   1
  -3  -9  12 282.992 34.1671  -2
   3 -12  12 282.992 34.1671   1
   4 -12  12 8.05399 3.09098   1
   5 -12  12 128.079 10.4955   1
  -6  -6  12 30.5579 22.9169  -2
   6 -12  12 30.5579 22.9169   1
   7 -12  12 9.91232 10.2089   1
 -10  -2  12 112.464 29.2442  -2
  10 -12  12 112.464 29.2442   1
 -11  -1  12 305.153 25.5037  -2
  11 -12  12 305.153 25.5037   1
  -5 -11  12 108.545 11.6056   1
   4 -15  12 344.973 38.0530  -2
  -4 -11  12 344.973 38.0530   1
   3 -14  12 336.981 39.1701  -2
  -3 -11  12 336.981 39.1701   1
  -2 -11  12 30.6728 6.42206   1
   1 -12  12 592.461 43.7750  -2
  -1 -11  12 592.461 43.7750   1
   0 -11  12 1040.95 58.7426  -2
   0 -11  12 1040.95 58.7426   1
  -1 -10  12 459.753 41.5509  -2
   1 -11  12 459.753 41.5509   1
  -2  -9  12 271.654 34.2979  -2
   2 -11  12 271.654 34.2979   1
  -3  -8  12 209.362 31.8175  -2
   3 -11  12 209.362 31.8175   1
  -4  -7  12 87.1785 25.8549  -2
   4 -11  12 87.1785 25.8549   1
  -5  -6  12 62.1591 24.3550  -2
   5 -11  12 62.1591 24.3550   1
  -6  -5  12 -19.647 18.5088  -2
   6 -11  12 -19.647 18.5088   1
  -7  -4  12 182.021 17.2024  -2
   7 -11  12 182.021 17.2024   1
  -8  -3  12 177.765 20.2272  -2
   8 -11  12 177.765 20.2272   1
 -10  -1  12 467.363 28.9467  -2
  10 -11  12 467.363 28.9467   1
 -11   0  12 492.705 30.7738  -2
  11 -11  12 492.705 30.7738   1
 -12   1  12 147.546 27.0007  -2
  12 -11  12 147.546 27.0007   1
  -6 -10  12 12.6425 3.97747   1
  -5 -10  12 208.241 13.3848   1
  -4 -10  12 430.456 20.4828   1
   3 -13  12 319.366 36.0228  -2
  -3 -10  12 319.366 36.0228   1
   2 -12  12 81.5409 27.0515  -2
  -2 -10  12 81.5409 27.0515   1
   1 -11  12 582.816 42.3107  -2
  -1 -10  12 582.816 42.3107   1
   0 -10  12 791.708 49.2896  -2
   0 -10  12 791.708 49.2896   1
  -1  -9  12 66.1397 14.6412  -2
   1 -10  12 66.1397 14.6412   1
  -2  -8  12 91.2730 15.2007  -2
   2 -10  12 91.2730 15.2007   1
  -3  -7  12 74.3627 14.3839  -2
   3 -10  12 74.3627 14.3839   1
  -4  -6  12 4.84430 19.2330  -2
   4 -10  12 4.84430 19.2330   1
  -5  -5  12 152.833 20.4590  -2
   5 -10  12 152.833 20.4590   1
  -6  -4  12 94.6744 22.2121  -2
   6 -10  12 94.6744 22.2121   1
  -7  -3  12 553.724 41.7260  -2
   7 -10  12 553.724 41.7260   1
  -8  -2  12 506.714 40.7908  -2
   8 -10  12 506.714 40.7908   1
  -9  -1  12 -20.839 17.9957  -2
   9 -10  12 -20.839 17.9957   1
 -10   0  12 342.703 33.6834  -2
  10 -10  12 342.703 33.6834   1
 -11   1  12 474.568 29.8128  -2
  11 -10  12 474.568 29.8128   1
 -12   2  12 133.444 20.7546  -2
  12 -10  12 133.444 20.7546   1
  -7  -9  12 6.52144 3.62822   1
  -6  -9  12 0.87706 3.75337   1
  -5  -9  12 323.684 18.2903   1
   4 -13  12 612.520 43.0974  -2
  -4  -9  12 612.520 43.0974   1
   3 -12  12 370.188 33.7732  -2
  -3  -9  12 370.188 33.7732   1
   2 -11  12 289.507 31.5694  -2
  -2  -9  12 289.507 31.5694   1
   1 -10  12 118.496 24.7806  -2
  -1  -9  12 118.496 24.7806   1
   0  -9  12 164.805 16.1405  -2
   0  -9  12 164.805 16.1405   1
  -1  -8  12 19.1074 19.1598  -2
   1  -9  12 19.1074 19.1598   1
  -2  -7  12 28.3615 8.76344  -2
   2  -9  12 28.3615 8.76344   1
  -3  -6  12 103.653 13.6945  -2
   3  -9  12 103.653 13.6945   1
  -4  -5  12 207.653 21.1279  -2
   4  -9  12 207.653 21.1279   1
  -5  -4  12 465.642 23.4489  -2
   5  -9  12 465.642 23.4489   1
  -6  -3  12 618.346 32.2502  -2
   6  -9  12 618.346 32.2502   1
  -7  -2  12 994.763 41.0476  -2
   7  -9  12 994.763 41.0476   1
  -8  -1  12 689.591 32.0800  -2
   8  -9  12 689.591 32.0800   1
  -9   0  12 120.380 15.8382  -2
   9  -9  12 120.380 15.8382   1
 -10   1  12 208.687 27.8636  -2
  10  -9  12 208.687 27.8636   1
 -11   2  12 119.980 27.8600  -2
  11  -9  12 119.980 27.8600   1
 -12   3  12 6.49616 17.9697  -2
  12  -9  12 6.49616 17.9697   1
  -8  -8  12 150.187 15.0948   1
  -7  -8  12 157.620 12.0920   1
  -6  -8  12 0.55447 2.81479   1
  -5  -8  12 476.936 20.0603   1
   4 -12  12 63.6947 21.0145  -2
  -4  -8  12 63.6947 21.0145   1
   3 -11  12 195.266 16.0511  -2
  -3  -8  12 195.266 16.0511   1
   2 -10  12 120.216 13.9083  -2
  -2  -8  12 120.216 13.9083   1
   1  -9  12 15.3722 18.3081  -2
  -1  -8  12 15.3722 18.3081   1
   0  -8  12 2.05805 17.7398  -2
   0  -8  12 2.05805 17.7398   1
  -1  -7  12 68.2069 11.3019  -2
   1  -8  12 68.2069 11.3019   1
  -2  -6  12 -7.4566 9.69597  -2
   2  -8  12 -7.4566 9.69597   1
  -3  -5  12 852.190 37.8718  -2
   3  -8  12 852.190 37.8718   1
  -4  -4  12 832.650 28.6972  -2
   4  -8  12 832.650 28.6972   1
  -5  -3  12 209.950 13.8252  -2
   5  -8  12 209.950 13.8252   1
  -6  -2  12 574.307 20.7827  -2
   6  -8  12 574.307 20.7827   1
  -7  -1  12 867.001 26.1922  -2
   7  -8  12 867.001 26.1922   1
  -8   0  12 728.068 34.1555  -2
   8  -8  12 728.068 34.1555   1
  -9   1  12 4.27960 12.4446  -2
   9  -8  12 4.27960 12.4446   1
 -10   2  12 40.2282 21.7866  -2
  10  -8  12 40.2282 21.7866   1
 -11   3  12 -25.053 21.9404  -2
  11  -8  12 -25.053 21.9404   1
  -8  -7  12 114.762 13.5442   1
  -7  -7  12 25.9084 6.01213   1
  -6  -7  12 6.65224 3.70888   1
  -5  -7  12 9.57114 2.87401   1
   4 -11  12 60.9092 20.6969  -2
  -4  -7  12 60.9092 20.6969   1
   3 -10  12 68.0521 11.3585  -2
  -3  -7  12 68.0521 11.3585   1
   2  -9  12 27.1558 10.6138  -2
  -2  -7  12 27.1558 10.6138   1
   1  -8  12 71.0200 10.2446  -2
  -1  -7  12 71.0200 10.2446   1
   0  -7  12 453.704 19.0758  -2
   0  -7  12 453.704 19.0758   1
  -1  -6  12 1003.82 31.9351  -2
   1  -7  12 1003.82 31.9351   1
  -2  -5  12 5.90401 8.31648  -2
   2  -7  12 5.90401 8.31648   1
  -3  -4  12 1647.76 39.5734  -2
   3  -7  12 1647.76 39.5734   1
  -4  -3  12 1103.80 30.2448  -2
   4  -7  12 1103.80 30.2448   1
  -5  -2  12 207.300 12.9932  -2
   5  -7  12 207.300 12.9932   1
  -6  -1  12 443.643 21.1355  -2
   6  -7  12 443.643 21.1355   1
  -7   0  12 600.398 24.3324  -2
   7  -7  12 600.398 24.3324   1
  -8   1  12 2.91496 10.5091  -2
   8  -7  12 2.91496 10.5091   1
  -9   2  12 -1.1229 11.5342  -2
   9  -7  12 -1.1229 11.5342   1
 -11   4  12 -22.441 17.7180  -2
  11  -7  12 -22.441 17.7180   1
  12  -7  12 40.6398 10.3320   1
  -9  -6  12 -0.7034 5.16632   1
  -8  -6  12 11.2138 3.56105   1
  -7  -6  12 5.13860 3.36134   1
   6 -12  12 20.6112 10.0377  -2
  -6  -6  12 20.6112 10.0377   1
   5 -11  12 66.6429 10.8905  -2
  -5  -6  12 66.6429 10.8905   1
   4 -10  12 -11.808 10.1024  -2
  -4  -6  12 -11.808 10.1024   1
   3  -9  12 93.0268 10.4133  -2
  -3  -6  12 93.0268 10.4133   1
   2  -8  12 9.76696 6.56920  -2
  -2  -6  12 9.76696 6.56920   1
   1  -7  12 905.679 22.9604  -2
  -1  -6  12 905.679 22.9604   1
   0  -6  12 2339.71 72.9147  -2
   0  -6  12 2339.71 72.9147   1
  -1  -5  12 325.183 18.6406  -2
   1  -6  12 325.183 18.6406   1
  -2  -4  12 296.500 15.0005  -2
   2  -6  12 296.500 15.0005   1
  -3  -3  12 1617.43 53.4079  -2
   3  -6  12 1617.43 53.4079   1
  -4  -2  12 867.360 25.7208  -2
   4  -6  12 867.360 25.7208   1
  -5  -1  12 279.536 17.8292  -2
   5  -6  12 279.536 17.8292   1
  -6   0  12 112.568 13.4176  -2
   6  -6  12 112.568 13.4176   1
  -7   1  12 62.1080 15.6790  -2
   7  -6  12 62.1080 15.6790   1
  -8   2  12 33.1260 12.3257  -2
   8  -6  12 33.1260 12.3257   1
  -9   3  12 53.9871 13.8863  -2
   9  -6  12 53.9871 13.8863   1
 -10   4  12 74.1313 26.7081  -2
  10  -6  12 74.1313 26.7081   1
 -11   5  12 63.5336 33.5966  -2
  11  -6  12 63.5336 33.5966   1
  12  -6  12 158.385 36.1666   1
 -10  -5  12 6.15430 4.90280   1
  -9  -5  12 6.78510 18.1838   1
   8 -13  12 68.3166 12.1573  -2
  -8  -5  12 68.3166 12.1573   1
   7 -12  12 -4.1234 9.44546  -2
  -7  -5  12 -4.1234 9.44546   1
   6 -11  12 8.52470 8.15671  -2
  -6  -5  12 8.52470 8.15671   1
   5 -10  12 126.279 12.5765  -2
  -5  -5  12 126.279 12.5765   1
   4  -9  12 223.521 12.0604  -2
  -4  -5  12 223.521 12.0604   1
   3  -8  12 1045.68 24.8555  -2
  -3  -5  12 1045.68 24.8555   1
   2  -7  12 16.3876 5.85754  -2
  -2  -5  12 16.3876 5.85754   1
   1  -6  12 324.161 20.6470  -2
  -1  -5  12 324.161 20.6470   1
   0  -5  12 1251.85 27.3222  -2
   0  -5  12 1251.85 27.3222   1
  -1  -4  12 785.738 20.3964  -2
   1  -5  12 785.738 20.3964   1
  -2  -3  12 291.559 14.5965  -2
   2  -5  12 291.559 14.5965   1
  -3  -2  12 423.923 18.8086  -2
   3  -5  12 423.923 18.8086   1
  -4  -1  12 280.712 25.4930  -2
   4  -5  12 280.712 25.4930   1
  -5   0  12 52.6543 12.3629  -2
   5  -5  12 52.6543 12.3629   1
  -6   1  12 107.202 17.3773  -2
   6  -5  12 107.202 17.3773   1
  -7   2  12 62.5728 17.6171  -2
   7  -5  12 62.5728 17.6171   1
  -8   3  12 296.913 21.0012  -2
   8  -5  12 296.913 21.0012   1
  -9   4  12 221.656 23.6831  -2
   9  -5  12 221.656 23.6831   1
  10  -5  12 9.76299 6.05356   1
  11  -5  12 136.578 32.6219   1
  -9  -4  12 2.81500 16.4589   1
   8 -12  12 5.18347 8.51264  -2
  -8  -4  12 5.18347 8.51264   1
   7 -11  12 153.848 11.3024  -2
  -7  -4  12 153.848 11.3024   1
   6 -10  12 120.127 10.8149  -2
  -6  -4  12 120.127 10.8149   1
   5  -9  12 403.415 16.9665  -2
  -5  -4  12 403.415 16.9665   1
   4  -8  12 743.749 18.9271  -2
  -4  -4  12 743.749 18.9271   1
   3  -7  12 1780.72 41.0036  -2
  -3  -4  12 1780.72 41.0036   1
   2  -6  12 372.496 12.0037  -2
  -2  -4  12 372.496 12.0037   1
   1  -5  12 686.785 20.5449  -2
  -1  -4  12 686.785 20.5449   1
   0  -4  12 1468.16 34.1887  -2
   0  -4  12 1468.16 34.1887   1
  -1  -3  12 202.915 11.7172  -2
   1  -4  12 202.915 11.7172   1
  -2  -2  12 58.0505 9.51724  -2
   2  -4  12 58.0505 9.51724   1
  -3  -1  12 19.6101 11.7408  -2
   3  -4  12 19.6101 11.7408   1
  -4   0  12 175.207 15.1866  -2
   4  -4  12 175.207 15.1866   1
  -5   1  12 130.791 34.5905  -2
   5  -4  12 130.791 34.5905   1
  -6   2  12 184.651 20.6372  -2
   6  -4  12 184.651 20.6372   1
  -7   3  12 234.876 36.3456  -2
   7  -4  12 234.876 36.3456   1
   8  -4  12 419.200 29.6457   1
   9  -4  12 220.687 22.9259   1
  10  -4  12 9.18033 6.08043   1
  11  -4  12 74.7652 12.9257   1
  10 -13  12 -3.8838 19.6891  -2
 -10  -3  12 -3.8838 19.6891   1
   9 -12  12 -30.998 38.3263  -2
  -9  -3  12 -30.998 38.3263   1
   8 -11  12 198.554 22.1989  -2
  -8  -3  12 198.554 22.1989   1
   7 -10  12 639.322 19.4754  -2
  -7  -3  12 639.322 19.4754   1
   6  -9  12 800.307 25.7982  -2
  -6  -3  12 800.307 25.7982   1
   5  -8  12 200.579 8.84442  -2
  -5  -3  12 200.579 8.84442   1
   4  -7  12 1003.54 24.8789  -2
  -4  -3  12 1003.54 24.8789   1
   3  -6  12 1886.74 35.9160  -2
  -3  -3  12 1886.74 35.9160   1
   2  -5  12 348.846 15.3796  -2
  -2  -3  12 348.846 15.3796   1
   1  -4  12 168.691 12.3081  -2
  -1  -3  12 168.691 12.3081   1
   0  -3  12 8.47005 8.58378  -2
   0  -3  12 8.47005 8.58378   1
  -1  -2  12 -5.4051 8.94332  -2
   1  -3  12 -5.4051 8.94332   1
  -2  -1  12 46.9124 12.7984  -2
   2  -3  12 46.9124 12.7984   1
  -3   0  12 97.6652 14.8510  -2
   3  -3  12 97.6652 14.8510   1
  -4   1  12 276.958 21.5588  -2
   4  -3  12 276.958 21.5588   1
   5  -3  12 431.079 46.3792   1
   6  -3  12 6.34750 4.03462   1
   7  -3  12 35.0828 8.04255   1
   8  -3  12 553.638 34.7278   1
   9  -3  12 67.4453 10.7143   1
  10  -3  12 1.37601 6.94758   1
  11  -3  12 12.8291 8.00981   1
  11 -13  12 58.3410 23.1159  -2
 -11  -2  12 58.3410 23.1159   1
  10 -12  12 125.108 21.9766  -2
 -10  -2  12 125.108 21.9766   1
   9 -11  12 -2.6290 14.3255  -2
  -9  -2  12 -2.6290 14.3255   1
   8 -10  12 462.059 28.7253  -2
  -8  -2  12 462.059 28.7253   1
   7  -9  12 1072.54 88.5626  -2
  -7  -2  12 1072.54 88.5626   1
   6  -8  12 636.279 30.9316  -2
  -6  -2  12 636.279 30.9316   1
   5  -7  12 186.571 11.2637  -2
  -5  -2  12 186.571 11.2637   1
   4  -6  12 794.537 31.8843  -2
  -4  -2  12 794.537 31.8843   1
   3  -5  12 358.276 12.4365  -2
  -3  -2  12 358.276 12.4365   1
   2  -4  12 46.8379 9.75767  -2
  -2  -2  12 46.8379 9.75767   1
   1  -3  12 5.09132 7.63678  -2
  -1  -2  12 5.09132 7.63678   1
   0  -2  12 36.1257 9.11527  -2
   0  -2  12 36.1257 9.11527   1
  -1  -1  12 173.673 10.8660  -2
   1  -2  12 173.673 10.8660   1
  -2   0  12 223.795 17.4066  -2
   2  -2  12 223.795 17.4066   1
  -3   1  12 394.402 19.2147  -2
   3  -2  12 394.402 19.2147   1
   4  -2  12 292.859 18.0866   1
   5  -2  12 766.065 29.9652   1
   6  -2  12 104.780 18.7453   1
   7  -2  12 96.8203 18.4047   1
   8  -2  12 130.664 20.5766   1
   9  -2  12 246.789 26.3992   1
  10  -2  12 34.1563 9.53552   1
  11 -12  12 335.825 33.8958  -2
 -11  -1  12 335.825 33.8958   1
  10 -11  12 458.408 31.3814  -2
 -10  -1  12 458.408 31.3814   1
   9 -10  12 -11.925 11.8553  -2
  -9  -1  12 -11.925 11.8553   1
   8  -9  12 652.208 33.3713  -2
  -8  -1  12 652.208 33.3713   1
   7  -8  12 896.341 38.9057  -2
  -7  -1  12 896.341 38.9057   1
   6  -7  12 432.078 24.2773  -2
  -6  -1  12 432.078 24.2773   1
   5  -6  12 236.528 16.7520  -2
  -5  -1  12 236.528 16.7520   1
   4  -5  12 241.561 40.6995  -2
  -4  -1  12 241.561 40.6995   1
   3  -4  12 25.2010 4.39662  -2
  -3  -1  12 25.2010 4.39662   1
   2  -3  12 19.6679 5.22992  -2
  -2  -1  12 19.6679 5.22992   1
   1  -2  12 138.435 8.54330  -2
  -1  -1  12 138.435 8.54330   1
   0  -1  12 903.044 22.4574  -2
   0  -1  12 903.044 22.4574   1
  -1   0  12 654.163 26.5430  -2
   1  -1  12 654.163 26.5430   1
  -2   1  12 625.525 31.6187  -2
   2  -1  12 625.525 31.6187   1
   3  -1  12 205.197 12.0616   1
   4  -1  12 1703.37 45.9855   1
   5  -1  12 570.937 34.0088   1
   6  -1  12 202.491 21.8442   1
   7  -1  12 5.70426 5.19084   1
   8  -1  12 34.0353 8.98040   1
   9  -1  12 27.0132 8.71252   1
  10  -1  12 -11.365 6.33867   1
 -12   0  12 66.2003 18.6640   1
  11 -11  12 468.197 31.8391  -2
 -11   0  12 468.197 31.8391   1
  10 -10  12 264.562 46.9933  -2
 -10   0  12 264.562 46.9933   1
   9  -9  12 93.2553 15.4439  -2
  -9   0  12 93.2553 15.4439   1
   8  -8  12 715.388 33.6818  -2
  -8   0  12 715.388 33.6818   1
   7  -7  12 608.818 65.7390  -2
  -7   0  12 608.818 65.7390   1
   6  -6  12 140.962 15.1907  -2
  -6   0  12 140.962 15.1907   1
   5  -5  12 75.3956 11.4480  -2
  -5   0  12 75.3956 11.4480   1
   4  -4  12 125.245 35.2701  -2
  -4   0  12 125.245 35.2701   1
   3  -3  12 80.6938 6.87854  -2
  -3   0  12 80.6938 6.87854   1
   2  -2  12 191.104 8.30762  -2
  -2   0  12 191.104 8.30762   1
   1  -1  12 501.825 24.9024  -2
  -1   0  12 501.825 24.9024   1
   0   0  12 174.979 13.0454   1
   1   0  12 953.354 25.0199   1
   2   0  12 409.877 15.8426   1
   3   0  12 7.84418 4.04242   1
   4   0  12 301.771 24.7601   1
   5   0  12 121.300 18.4397   1
   6   0  12 85.3481 17.3913   1
   7   0  12 -0.3970 5.83391   1
   8   0  12 4.00301 6.84038   1
   9   0  12 1.36746 6.98278   1
  12 -11  12 59.4767 20.0314  -2
 -12   1  12 59.4767 20.0314   1
  11 -10  12 448.677 30.3545  -2
 -11   1  12 448.677 30.3545   1
  10  -9  12 142.367 38.4171  -2
 -10   1  12 142.367 38.4171   1
   9  -8  12 10.9624 13.7951  -2
  -9   1  12 10.9624 13.7951   1
   8  -7  12 26.7279 31.9122  -2
  -8   1  12 26.7279 31.9122   1
   7  -6  12 31.9437 13.3090  -2
  -7   1  12 31.9437 13.3090   1
   6  -5  12 72.6446 12.4367  -2
  -6   1  12 72.6446 12.4367   1
   5  -4  12 114.266 12.3841  -2
  -5   1  12 114.266 12.3841   1
   4  -3  12 216.071 41.1286  -2
  -4   1  12 216.071 41.1286   1
  -3   1  12 324.548 44.3297   1
  -2   1  12 443.882 17.8557   1
  -1   1  12 147.313 10.5719   1
   0   1  12 343.027 17.9961   1
   1   1  12 641.103 28.2502   1
   2   1  12 356.665 18.2883   1
   3   1  12 98.1005 27.4719   1
   4   1  12 25.1811 13.3282   1
   5   1  12 5.50473 5.30766   1
   6   1  12 25.3610 7.32452   1
   7   1  12 -3.8440 5.41736   1
   8   1  12 9.66756 7.15760   1
  12 -10  12 97.8708 20.3763  -2
 -12   2  12 97.8708 20.3763   1
  11  -9  12 97.3416 19.4342  -2
 -11   2  12 97.3416 19.4342   1
  10  -8  12 -26.887 30.7826  -2
 -10   2  12 -26.887 30.7826   1
   8  -6  12 16.3065 14.4997  -2
  -8   2  12 16.3065 14.4997   1
   7  -5  12 39.5805 34.5351  -2
  -7   2  12 39.5805 34.5351   1
   6  -4  12 204.204 14.4824  -2
  -6   2  12 204.204 14.4824   1
  -5   2  12 139.466 33.8916   1
  -4   2  12 10.6213 9.86713   1
  -3   2  12 893.739 28.5868   1
  -2   2  12 687.480 24.5683   1
  -1   2  12 108.837 10.3641   1
   0   2  12 70.0878 8.35898   1
   1   2  12 157.387 11.0412   1
   2   2  12 91.0631 14.0755   1
   3   2  12 27.6269 7.39031   1
   4   2  12 4.93509 3.52233   1
   5   2  12 18.4085 4.07808   1
   6   2  12 23.6347 8.10108   1
   7   2  12 3.38848 5.47383   1
  12  -9  12 40.8844 18.3748  -2
 -12   3  12 40.8844 18.3748   1
  11  -8  12 -12.725 16.6064  -2
 -11   3  12 -12.725 16.6064   1
  10  -7  12 -38.860 32.1769  -2
 -10   3  12 -38.860 32.1769   1
   9  -6  12 44.8844 38.5939  -2
  -9   3  12 44.8844 38.5939   1
   8  -5  12 188.225 47.6927  -2
  -8   3  12 188.225 47.6927   1
  -7   3  12 150.365 36.0822   1
  -6   3  12 551.072 58.5569   1
  -5   3  12 334.498 45.5379   1
  -4   3  12 409.148 17.1597   1
  -3   3  12 305.724 15.3541   1
  -2   3  12 329.353 12.9210   1
  -1   3  12 80.2862 8.02179   1
   0   3  12 11.2530 5.00545   1
   1   3  12 -2.6342 3.92506   1
   2   3  12 11.0203 5.65378   1
   3   3  12 0.24002 4.76906   1
   4   3  12 30.1312 5.23125   1
   5   3  12 92.8378 12.3160   1
   6   3  12 207.900 17.9473   1
   7   3  12 17.2272 6.24479   1
  12  -8  12 -29.995 17.6119  -2
 -12   4  12 -29.995 17.6119   1
  11  -7  12 52.8137 19.6476  -2
 -11   4  12 52.8137 19.6476   1
  10  -6  12 18.0925 39.9596  -2
 -10   4  12 18.0925 39.9596   1
   9  -5  12 205.419 51.0121  -2
  -9   4  12 205.419 51.0121   1
  -8   4  12 15.9497 11.7897   1
  -7   4  12 372.778 49.8666   1
  -6   4  12 494.239 55.6635   1
  -5   4  12 172.553 34.4029   1
  -4   4  12 -1.2066 1.61983   1
  -3   4  12 44.0615 5.85409   1
  -2   4  12 110.978 8.68666   1
  -1   4  12 19.8488 5.74506   1
   0   4  12 -2.4311 3.86769   1
   1   4  12 0.66474 4.31043   1
   2   4  12 11.1698 5.31252   1
   3   4  12 110.779 16.6247   1
   4   4  12 74.6886 9.54167   1
   5   4  12 90.8257 17.3468   1
   6   4  12 325.062 22.3348   1
  11  -6  12 147.245 23.1465  -2
 -11   5  12 147.245 23.1465   1
 -10   5  12 366.183 27.2392   1
  -9   5  12 244.003 47.3633   1
  -8   5  12 19.9965 14.5676   1
  -7   5  12 124.023 34.5044   1
  -6   5  12 110.594 33.1046   1
  -5   5  12 34.7933 4.90999   1
  -4   5  12 18.6324 3.05966   1
  -3   5  12 8.89609 3.08903   1
  -2   5  12 32.0587 8.28385   1
  -1   5  12 123.481 14.8702   1
   0   5  12 0.10209 4.29011   1
   1   5  12 202.589 19.5248   1
   2   5  12 331.503 24.4004   1
   3   5  12 174.685 21.6279   1
   4   5  12 13.2884 7.36970   1
 -11   6  12 62.3919 15.7073   1
 -10   6  12 171.637 42.5272   1
  -9   6  12 198.479 44.0464   1
  -8   6  12 236.735 43.8820   1
  -7   6  12 3.96628 2.22111   1
  -6   6  12 -0.2676 2.79807   1
  -5   6  12 14.9390 3.05834   1
  -4   6  12 -3.1749 3.37654   1
  -3   6  12 7.77378 3.08274   1
  -2   6  12 93.5178 13.6519   1
  -1   6  12 74.9511 12.3298   1
   0   6  12 15.6986 7.34501   1
   1   6  12 59.8371 16.4352   1
   2   6  12 165.777 19.8681   1
   3   6  12 82.2499 12.3718   1
 -11   7  12 3.98829 13.0419   1
 -10   7  12 121.363 39.2689   1
  -8   7  12 13.5749 16.2216   1
  -7   7  12 46.3459 7.08866   1
  -6   7  12 6.14183 3.54408   1
  -5   7  12 14.1413 4.78682   1
  -4   7  12 -3.5033 3.88225   1
  -3   7  12 15.9852 6.31977   1
  -2   7  12 130.081 16.2447   1
  -1   7  12 241.447 20.1493   1
   0   7  12 5.74361 5.13345   1
   1   7  12 30.6058 10.8851   1
   2   7  12 54.2856 12.9470   1
 -10   8  12 10.1497 12.3159   1
  -9   8  12 -5.3431 10.3173   1
  -8   8  12 6.58222 3.51730   1
  -7   8  12 -1.1367 3.21444   1
  -6   8  12 26.7150 6.86173   1
  -5   8  12 57.5078 10.4419   1
  -4   8  12 -5.8716 4.14720   1
  -3   8  12 24.5776 6.24034   1
  -2   8  12 169.707 17.6981   1
  -1   8  12 108.639 16.8583   1
   0   8  12 16.6786 7.12897   1
  -8   9  12 9.55771 4.08970   1
  -7   9  12 33.5908 9.71668   1
  -6   9  12 130.784 13.7355   1
  -5   9  12 109.612 15.0440   1
  -4   9  12 69.5096 12.9221   1
  -3   9  12 7.19897 5.24603   1
   2 -15  13 36.0049 7.75897   1
   3 -15  13 54.1996 12.8368   1
   4 -15  13 358.056 23.6916   1
   5 -15  13 343.546 23.5902   1
   6 -15  13 61.9863 7.83452   1
   7 -15  13 -3.9699 5.87262   1
   8 -15  13 5.34610 6.94440   1
   0 -14  13 144.013 9.64035   1
   1 -14  13 254.002 19.7275   1
   2 -14  13 10.1708 5.13471   1
   3 -14  13 22.8787 6.29641   1
   4 -14  13 295.817 13.3517   1
   5 -14  13 452.711 17.1658   1
   6 -14  13 214.855 12.7911   1
   7 -14  13 70.4420 13.6882   1
   8 -14  13 18.8484 7.87446   1
   9 -14  13 28.8393 10.3532   1
  10 -14  13 -6.5073 6.52242   1
  -2 -13  13 21.3944 3.56200   1
   1 -14  13 141.799 36.7909  -2
  -1 -13  13 141.799 36.7909   1
   0 -13  13 267.272 38.2250  -2
   0 -13  13 267.272 38.2250   1
  -1 -12  13 248.101 39.2529  -2
   1 -13  13 248.101 39.2529   1
   2 -13  13 13.6364 3.44218   1
   3 -13  13 209.336 12.1288   1
   4 -13  13 489.682 19.6867   1
   5 -13  13 23.9101 4.18290   1
   6 -13  13 -4.9692 3.06517   1
   7 -13  13 -1.9000 3.93749   1
  -8  -5  13 413.854 42.3935  -2
   8 -13  13 413.854 42.3935   1
  -9  -4  13 459.069 44.8173  -2
   9 -13  13 459.069 44.8173   1
 -10  -3  13 6.76892 26.1538  -2
  10 -13  13 6.76892 26.1538   1
   3 -15  13 48.7153 29.9149  -2
  -3 -12  13 48.7153 29.9149   1
   2 -14  13 52.9532 29.7056  -2
  -2 -12  13 52.9532 29.7056   1
   1 -13  13 159.594 34.6118  -2
  -1 -12  13 159.594 34.6118   1
   0 -12  13 64.9307 8.79239   1
   1 -12  13 59.2670 9.89477   1
  -2 -10  13 144.121 30.5342  -2
   2 -12  13 144.121 30.5342   1
  -3  -9  13 198.588 31.8301  -2
   3 -12  13 198.588 31.8301   1
  -4  -8  13 101.768 28.2216  -2
   4 -12  13 101.768 28.2216   1
  -5  -7  13 83.8149 28.0233  -2
   5 -12  13 83.8149 28.0233   1
  -6  -6  13 66.1157 25.1736  -2
   6 -12  13 66.1157 25.1736   1
   7 -12  13 154.000 42.5220   1
  -9  -3  13 453.849 43.1482  -2
   9 -12  13 453.849 43.1482   1
 -10  -2  13 17.7156 24.7690  -2
  10 -12  13 17.7156 24.7690   1
 -11  -1  13 95.8490 27.8506  -2
  11 -12  13 95.8490 27.8506   1
  -5 -11  13 188.638 16.0279   1
   4 -15  13 275.713 40.9837  -2
  -4 -11  13 275.713 40.9837   1
   3 -14  13 2.17994 26.5753  -2
  -3 -11  13 2.17994 26.5753   1
  -2 -11  13 -1.0854 4.55059   1
   1 -12  13 105.535 28.7392  -2
  -1 -11  13 105.535 28.7392   1
   0 -11  13 43.2311 26.8490  -2
   0 -11  13 43.2311 26.8490   1
  -1 -10  13 95.3577 26.9937  -2
   1 -11  13 95.3577 26.9937   1
  -2  -9  13 663.742 47.0384  -2
   2 -11  13 663.742 47.0384   1
  -3  -8  13 426.890 39.3556  -2
   3 -11  13 426.890 39.3556   1
  -4  -7  13 50.8131 24.3156  -2
   4 -11  13 50.8131 24.3156   1
  -5  -6  13 303.941 34.0535  -2
   5 -11  13 303.941 34.0535   1
  -6  -5  13 416.041 24.0633  -2
   6 -11  13 416.041 24.0633   1
  -7  -4  13 1.43039 16.0325  -2
   7 -11  13 1.43039 16.0325   1
  -8  -3  13 295.392 33.5352  -2
   8 -11  13 295.392 33.5352   1
 -10  -1  13 19.7055 13.8554  -2
  10 -11  13 19.7055 13.8554   1
 -11   0  13 126.383 29.0712  -2
  11 -11  13 126.383 29.0712   1
  -6 -10  13 343.567 17.0306   1
  -5 -10  13 263.550 16.9732   1
   4 -14  13 218.861 33.5771  -2
  -4 -10  13 218.861 33.5771   1
  -3 -10  13 10.3345 3.53066   1
   2 -12  13 152.341 28.5453  -2
  -2 -10  13 152.341 28.5453   1
   1 -11  13 68.7200 24.3280  -2
  -1 -10  13 68.7200 24.3280   1
   0 -10  13 -14.461 12.8319  -2
   0 -10  13 -14.461 12.8319   1
  -1  -9  13 566.663 26.7502  -2
   1 -10  13 566.663 26.7502   1
  -2  -8  13 1643.89 50.2371  -2
   2 -10  13 1643.89 50.2371   1
  -3  -7  13 979.293 55.8093  -2
   3 -10  13 979.293 55.8093   1
  -4  -6  13 12.6696 20.1203  -2
   4 -10  13 12.6696 20.1203   1
  -5  -5  13 379.031 27.6736  -2
   5 -10  13 379.031 27.6736   1
  -6  -4  13 247.595 23.1512  -2
   6 -10  13 247.595 23.1512   1
  -8  -2  13 176.094 17.3466  -2
   8 -10  13 176.094 17.3466   1
  -9  -1  13 53.9091 17.2980  -2
   9 -10  13 53.9091 17.2980   1
 -10   0  13 26.1694 10.5102  -2
  10 -10  13 26.1694 10.5102   1
 -11   1  13 88.4249 25.7190  -2
  11 -10  13 88.4249 25.7190   1
  -6  -9  13 216.053 13.2659   1
  -5  -9  13 102.834 12.2868   1
  -4  -9  13 249.161 14.8976   1
   3 -12  13 263.629 28.7973  -2
  -3  -9  13 263.629 28.7973   1
   2 -11  13 647.858 27.3579  -2
  -2  -9  13 647.858 27.3579   1
   1 -10  13 533.238 24.9208  -2
  -1  -9  13 533.238 24.9208   1
   0  -9  13 -8.3709 11.0842  -2
   0  -9  13 -8.3709 11.0842   1
  -1  -8  13 1094.64 37.1122  -2
   1  -9  13 1094.64 37.1122   1
  -2  -7  13 2853.80 109.105  -2
   2  -9  13 2853.80 109.105   1
  -3  -6  13 1004.88 36.0804  -2
   3  -9  13 1004.88 36.0804   1
  -4  -5  13 15.3998 10.3524  -2
   4  -9  13 15.3998 10.3524   1
  -5  -4  13 71.2729 16.2946  -2
   5  -9  13 71.2729 16.2946   1
  -6  -3  13 56.0856 19.0189  -2
   6  -9  13 56.0856 19.0189   1
  -7  -2  13 53.1006 12.6247  -2
   7  -9  13 53.1006 12.6247   1
  -8  -1  13 16.4738 7.19968  -2
   8  -9  13 16.4738 7.19968   1
  -9   0  13 37.4088 17.9648  -2
   9  -9  13 37.4088 17.9648   1
 -10   1  13 68.8891 23.3562  -2
  10  -9  13 68.8891 23.3562   1
 -11   2  13 37.8231 16.7926  -2
  11  -9  13 37.8231 16.7926   1
  -7  -8  13 3.77029 4.15319   1
  -6  -8  13 64.9292 10.0262   1
  -5  -8  13 165.310 13.0608   1
   4 -12  13 71.6724 12.8734  -2
  -4  -8  13 71.6724 12.8734   1
   3 -11  13 531.853 23.3662  -2
  -3  -8  13 531.853 23.3662   1
   2 -10  13 1686.38 47.4774  -2
  -2  -8  13 1686.38 47.4774   1
   1  -9  13 1103.22 35.7341  -2
  -1  -8  13 1103.22 35.7341   1
   0  -8  13 51.1635 11.1308  -2
   0  -8  13 51.1635 11.1308   1
  -1  -7  13 1922.69 48.4077  -2
   1  -8  13 1922.69 48.4077   1
  -2  -6  13 1667.25 45.6565  -2
   2  -8  13 1667.25 45.6565   1
  -3  -5  13 1066.56 30.6754  -2
   3  -8  13 1066.56 30.6754   1
  -4  -4  13 75.5244 12.1453  -2
   4  -8  13 75.5244 12.1453   1
  -5  -3  13 52.9732 13.0005  -2
   5  -8  13 52.9732 13.0005   1
  -6  -2  13 54.3374 9.77676  -2
   6  -8  13 54.3374 9.77676   1
  -7  -1  13 -1.6278 9.20019  -2
   7  -8  13 -1.6278 9.20019   1
  -8   0  13 67.4467 14.8007  -2
   8  -8  13 67.4467 14.8007   1
  -9   1  13 332.696 33.8005  -2
   9  -8  13 332.696 33.8005   1
 -11   3  13 161.973 23.4978  -2
  11  -8  13 161.973 23.4978   1
  -8  -7  13 -7.3590 3.80729   1
  -7  -7  13 0.49318 3.16487   1
  -6  -7  13 -6.7663 4.13666   1
   5 -12  13 118.386 20.7704  -2
  -5  -7  13 118.386 20.7704   1
   4 -11  13 54.8216 10.8916  -2
  -4  -7  13 54.8216 10.8916   1
   3 -10  13 1043.95 33.1319  -2
  -3  -7  13 1043.95 33.1319   1
   2  -9  13 3056.94 67.2458  -2
  -2  -7  13 3056.94 67.2458   1
   1  -8  13 2052.08 49.5545  -2
  -1  -7  13 2052.08 49.5545   1
   0  -7  13 -2.3317 13.5537  -2
   0  -7  13 -2.3317 13.5537   1
  -1  -6  13 764.780 36.1941  -2
   1  -7  13 764.780 36.1941   1
  -2  -5  13 1135.70 34.4110  -2
   2  -7  13 1135.70 34.4110   1
  -3  -4  13 694.184 23.3780  -2
   3  -7  13 694.184 23.3780   1
  -4  -3  13 407.041 24.7831  -2
   4  -7  13 407.041 24.7831   1
  -5  -2  13 487.067 27.9834  -2
   5  -7  13 487.067 27.9834   1
  -6  -1  13 955.898 34.2452  -2
   6  -7  13 955.898 34.2452   1
  -7   0  13 119.801 14.0618  -2
   7  -7  13 119.801 14.0618   1
  -8   1  13 411.899 26.0370  -2
   8  -7  13 411.899 26.0370   1
  -9   2  13 345.507 24.6465  -2
   9  -7  13 345.507 24.6465   1
 -11   4  13 87.0105 32.4309  -2
  11  -7  13 87.0105 32.4309   1
  -9  -6  13 -2.7730 3.98889   1
  -8  -6  13 3.84655 17.5848   1
   7 -13  13 1.15495 10.4664  -2
  -7  -6  13 1.15495 10.4664   1
   6 -12  13 126.032 12.2046  -2
  -6  -6  13 126.032 12.2046   1
   5 -11  13 340.562 20.8046  -2
  -5  -6  13 340.562 20.8046   1
   4 -10  13 -8.3295 8.17025  -2
  -4  -6  13 -8.3295 8.17025   1
   3  -9  13 928.143 27.8980  -2
  -3  -6  13 928.143 27.8980   1
   2  -8  13 1661.78 41.3071  -2
  -2  -6  13 1661.78 41.3071   1
   1  -7  13 790.808 21.5497  -2
  -1  -6  13 790.808 21.5497   1
   0  -6  13 124.269 11.5820  -2
   0  -6  13 124.269 11.5820   1
  -1  -5  13 336.853 21.1459  -2
   1  -6  13 336.853 21.1459   1
  -2  -4  13 195.016 10.3055  -2
   2  -6  13 195.016 10.3055   1
  -3  -3  13 300.659 20.7068  -2
   3  -6  13 300.659 20.7068   1
  -4  -2  13 1067.99 43.2238  -2
   4  -6  13 1067.99 43.2238   1
  -5  -1  13 1805.71 60.9770  -2
   5  -6  13 1805.71 60.9770   1
  -6   0  13 1170.02 39.2169  -2
   6  -6  13 1170.02 39.2169   1
  -7   1  13 324.133 25.8308  -2
   7  -6  13 324.133 25.8308   1
  -8   2  13 256.471 23.0104  -2
   8  -6  13 256.471 23.0104   1
  -9   3  13 626.635 34.4277  -2
   9  -6  13 626.635 34.4277   1
 -10   4  13 840.544 63.6614  -2
  10  -6  13 840.544 63.6614   1
  11  -6  13 423.472 31.7864   1
   9 -14  13 27.8173 12.5494  -2
  -9  -5  13 27.8173 12.5494   1
   8 -13  13 357.664 21.7805  -2
  -8  -5  13 357.664 21.7805   1
   7 -12  13 66.8645 10.4017  -2
  -7  -5  13 66.8645 10.4017   1
   6 -11  13 428.098 20.5367  -2
  -6  -5  13 428.098 20.5367   1
   5 -10  13 330.885 17.6285  -2
  -5  -5  13 330.885 17.6285   1
   4  -9  13 5.68865 6.94380  -2
  -4  -5  13 5.68865 6.94380   1
   3  -8  13 1032.74 24.5169  -2
  -3  -5  13 1032.74 24.5169   1
   2  -7  13 1070.58 29.5532  -2
  -2  -5  13 1070.58 29.5532   1
   1  -6  13 415.689 24.8938  -2
  -1  -5  13 415.689 24.8938   1
   0  -5  13 0.71012 2.09981  -2
   0  -5  13 0.71012 2.09981   1
  -1  -4  13 95.5000 11.3122  -2
   1  -5  13 95.5000 11.3122   1
  -2  -3  13 100.503 12.0901  -2
   2  -5  13 100.503 12.0901   1
  -3  -2  13 135.837 26.6955  -2
   3  -5  13 135.837 26.6955   1
  -5   0  13 1530.53 54.4562  -2
   5  -5  13 1530.53 54.4562   1
  -6   1  13 1349.58 52.4107  -2
   6  -5  13 1349.58 52.4107   1
  -7   2  13 874.938 42.3074  -2
   7  -5  13 874.938 42.3074   1
  -8   3  13 253.879 24.7257  -2
   8  -5  13 253.879 24.7257   1
  -9   4  13 183.196 36.9348  -2
   9  -5  13 183.196 36.9348   1
  10  -5  13 323.479 27.5226   1
  11  -5  13 113.271 31.5991   1
  10 -14  13 -23.150 22.1189  -2
 -10  -4  13 -23.150 22.1189   1
   8 -12  13 260.647 13.5018  -2
  -8  -4  13 260.647 13.5018   1
   7 -11  13 28.8678 7.35262  -2
  -7  -4  13 28.8678 7.35262   1
   6 -10  13 300.545 14.6698  -2
  -6  -4  13 300.545 14.6698   1
   5  -9  13 120.126 9.65125  -2
  -5  -4  13 120.126 9.65125   1
   4  -8  13 45.7461 5.96449  -2
  -4  -4  13 45.7461 5.96449   1
   3  -7  13 639.331 19.1819  -2
  -3  -4  13 639.331 19.1819   1
   2  -6  13 181.598 8.74974  -2
  -2  -4  13 181.598 8.74974   1
   1  -5  13 115.212 9.47190  -2
  -1  -4  13 115.212 9.47190   1
   0  -4  13 6.81651 5.76438  -2
   0  -4  13 6.81651 5.76438   1
  -1  -3  13 139.117 13.1367  -2
   1  -4  13 139.117 13.1367   1
  -2  -2  13 206.042 15.8695  -2
   2  -4  13 206.042 15.8695   1
  -3  -1  13 373.153 23.2241  -2
   3  -4  13 373.153 23.2241   1
  -4   0  13 1674.01 90.9296  -2
   4  -4  13 1674.01 90.9296   1
  -5   1  13 2063.24 82.3711  -2
   5  -4  13 2063.24 82.3711   1
  -6   2  13 1314.21 51.2825  -2
   6  -4  13 1314.21 51.2825   1
   7  -4  13 646.844 34.2107   1
   8  -4  13 2.04949 3.91606   1
   9  -4  13 26.1535 8.13487   1
  10  -4  13 21.7328 8.25511   1
  10 -13  13 5.24479 20.5830  -2
 -10  -3  13 5.24479 20.5830   1
   8 -11  13 394.202 28.5449  -2
  -8  -3  13 394.202 28.5449   1
   6  -9  13 28.2875 27.4182  -2
  -6  -3  13 28.2875 27.4182   1
   5  -8  13 68.3554 9.43072  -2
  -5  -3  13 68.3554 9.43072   1
   4  -7  13 372.532 12.5966  -2
  -4  -3  13 372.532 12.5966   1
   3  -6  13 334.986 10.9611  -2
  -3  -3  13 334.986 10.9611   1
   2  -5  13 117.769 9.01646  -2
  -2  -3  13 117.769 9.01646   1
   1  -4  13 154.509 10.4728  -2
  -1  -3  13 154.509 10.4728   1
   0  -3  13 269.961 18.3665  -2
   0  -3  13 269.961 18.3665   1
  -1  -2  13 511.352 25.0219  -2
   1  -3  13 511.352 25.0219   1
  -2  -1  13 221.531 16.5109  -2
   2  -3  13 221.531 16.5109   1
  -3   0  13 393.380 21.3936  -2
   3  -3  13 393.380 21.3936   1
  -4   1  13 1061.74 50.0902  -2
   4  -3  13 1061.74 50.0902   1
   5  -3  13 261.014 20.8252   1
   6  -3  13 123.681 13.6028   1
   7  -3  13 163.436 21.7781   1
   8  -3  13 22.0097 8.94320   1
   9  -3  13 66.8596 13.9067   1
  10  -3  13 -13.250 6.78436   1
 -11  -2  13 162.624 25.9039   1
  10 -12  13 40.5594 20.4051  -2
 -10  -2  13 40.5594 20.4051   1
   9 -11  13 327.523 57.2657  -2
  -9  -2  13 327.523 57.2657   1
   8 -10  13 208.291 23.3593  -2
  -8  -2  13 208.291 23.3593   1
   7  -9  13 43.7694 28.1760  -2
  -7  -2  13 43.7694 28.1760   1
   6  -8  13 63.2055 12.5243  -2
  -6  -2  13 63.2055 12.5243   1
   5  -7  13 369.433 52.4492  -2
  -5  -2  13 369.433 52.4492   1
   4  -6  13 1021.98 25.2499  -2
  -4  -2  13 1021.98 25.2499   1
   3  -5  13 214.473 11.7965  -2
  -3  -2  13 214.473 11.7965   1
   2  -4  13 153.652 8.88839  -2
  -2  -2  13 153.652 8.88839   1
   1  -3  13 527.743 17.0971  -2
  -1  -2  13 527.743 17.0971   1
   0  -2  13 749.395 22.8315  -2
   0  -2  13 749.395 22.8315   1
  -1  -1  13 508.612 24.3092  -2
   1  -2  13 508.612 24.3092   1
  -2   0  13 53.4024 10.6358  -2
   2  -2  13 53.4024 10.6358   1
  -3   1  13 794.086 40.2306  -2
   3  -2  13 794.086 40.2306   1
   4  -2  13 40.5593 10.1006   1
   5  -2  13 170.279 16.6971   1
   6  -2  13 143.179 20.2040   1
   7  -2  13 30.2799 8.72936   1
   8  -2  13 17.1937 7.18136   1
   9  -2  13 -1.7905 6.12353   1
  11 -12  13 133.553 24.7895  -2
 -11  -1  13 133.553 24.7895   1
  10 -11  13 29.4412 16.8472  -2
 -10  -1  13 29.4412 16.8472   1
   9 -10  13 -16.902 28.0263  -2
  -9  -1  13 -16.902 28.0263   1
   8  -9  13 -6.6927 27.6445  -2
  -8  -1  13 -6.6927 27.6445   1
   7  -8  13 -11.457 25.0813  -2
  -7  -1  13 -11.457 25.0813   1
   6  -7  13 919.392 80.7416  -2
  -6  -1  13 919.392 80.7416   1
   5  -6  13 1629.65 54.0297  -2
  -5  -1  13 1629.65 54.0297   1
   4  -5  13 822.762 32.6995  -2
  -4  -1  13 822.762 32.6995   1
   3  -4  13 364.034 13.8003  -2
  -3  -1  13 364.034 13.8003   1
   2  -3  13 159.470 8.90621  -2
  -2  -1  13 159.470 8.90621   1
   1  -2  13 527.655 16.3145  -2
  -1  -1  13 527.655 16.3145   1
   0  -1  13 693.664 22.1553  -2
   0  -1  13 693.664 22.1553   1
  -1   0  13 560.940 29.2092  -2
   1  -1  13 560.940 29.2092   1
   2  -1  13 8.90238 3.22612   1
   3  -1  13 202.347 16.7395   1
   4  -1  13 42.8235 10.3230   1
   5  -1  13 146.904 20.3658   1
   6  -1  13 -1.9246 4.37628   1
   7  -1  13 42.7431 15.6824   1
   8  -1  13 13.2150 7.11424   1
   9  -1  13 1.80355 5.14863   1
  11 -11  13 112.872 21.3978  -2
 -11   0  13 112.872 21.3978   1
  10 -10  13 38.3589 16.8586  -2
 -10   0  13 38.3589 16.8586   1
   9  -9  13 -2.9890 27.1557  -2
  -9   0  13 -2.9890 27.1557   1
   8  -8  13 44.3406 33.9698  -2
  -8   0  13 44.3406 33.9698   1
   7  -7  13 81.0027 34.8557  -2
  -7   0  13 81.0027 34.8557   1
   6  -6  13 1033.93 39.5789  -2
  -6   0  13 1033.93 39.5789   1
   5  -5  13 1566.06 50.1054  -2
  -5   0  13 1566.06 50.1054   1
   4  -4  13 1909.17 57.5970  -2
  -4   0  13 1909.17 57.5970   1
   3  -3  13 438.792 54.8382  -2
  -3   0  13 438.792 54.8382   1
   2  -2  13 19.5485 8.78812  -2
  -2   0  13 19.5485 8.78812   1
   1  -1  13 525.996 25.8259  -2
  -1   0  13 525.996 25.8259   1
   0   0  13 299.411 16.8310   1
   1   0  13 38.7779 5.90829   1
   2   0  13 38.9895 7.10953   1
   3   0  13 65.9140 10.8778   1
   4   0  13 536.146 27.3460   1
   5   0  13 153.348 20.4361   1
   6   0  13 25.6123 7.55476   1
   7   0  13 196.465 25.1370   1
   8   0  13 92.3577 15.4445   1
  11 -10  13 89.9164 21.0033  -2
 -11   1  13 89.9164 21.0033   1
  10  -9  13 50.7193 17.6024  -2
 -10   1  13 50.7193 17.6024   1
   9  -8  13 304.067 52.5317  -2
  -9   1  13 304.067 52.5317   1
   8  -7  13 402.848 59.2030  -2
  -8   1  13 402.848 59.2030   1
   7  -6  13 283.523 50.1424  -2
  -7   1  13 283.523 50.1424   1
   6  -5  13 1039.03 82.9452  -2
  -6   1  13 1039.03 82.9452   1
   5  -4  13 1908.87 120.705  -2
  -5   1  13 1908.87 120.705   1
  -4   1  13 1169.02 88.6256   1
  -3   1  13 386.906 15.7121   1
  -2   1  13 12.8937 3.57074   1
  -1   1  13 8.71731 3.49252   1
   0   1  13 5.43842 4.38806   1
   1   1  13 5.89446 9.38736   1
   2   1  13 27.1514 7.46750   1
   3   1  13 437.312 23.3278   1
   4   1  13 451.268 52.2286   1
   5   1  13 112.180 11.8979   1
   6   1  13 -1.6894 5.53433   1
   7   1  13 151.963 22.3902   1
   8   1  13 94.9852 34.0758   1
  11  -9  13 51.4382 21.5771  -2
 -11   2  13 51.4382 21.5771   1
  10  -8  13 370.627 28.8148  -2
 -10   2  13 370.627 28.8148   1
   9  -7  13 306.009 55.3623  -2
  -9   2  13 306.009 55.3623   1
   8  -6  13 201.292 50.0775  -2
  -8   2  13 201.292 50.0775   1
   7  -5  13 693.647 69.3167  -2
  -7   2  13 693.647 69.3167   1
   6  -4  13 985.650 81.1222  -2
  -6   2  13 985.650 81.1222   1
  -5   2  13 431.628 52.6210   1
  -4   2  13 414.066 16.0610   1
  -3   2  13 632.310 23.5021   1
  -2   2  13 131.300 10.6640   1
  -1   2  13 107.136 10.7486   1
   0   2  13 30.7527 13.8177   1
   1   2  13 17.6180 12.1488   1
   2   2  13 216.195 38.3503   1
   3   2  13 540.865 57.8155   1
   4   2  13 1016.29 37.7233   1
   5   2  13 81.5773 12.7969   1
   6   2  13 4.37721 6.12596   1
   7   2  13 3.47195 6.76317   1
  11  -8  13 217.912 28.8885  -2
 -11   3  13 217.912 28.8885   1
  10  -7  13 208.496 49.9322  -2
 -10   3  13 208.496 49.9322   1
   9  -6  13 598.769 70.9414  -2
  -9   3  13 598.769 70.9414   1
   8  -5  13 202.048 53.1770  -2
  -8   3  13 202.048 53.1770   1
  -7   3  13 95.8484 34.2375   1
  -6   3  13 15.1550 12.8483   1
  -5   3  13 40.9174 15.1666   1
  -4   3  13 280.027 13.8532   1
  -3   3  13 33.8246 7.36519   1
  -2   3  13 2.89303 3.03288   1
  -1   3  13 168.739 17.0169   1
   0   3  13 156.239 15.7027   1
   1   3  13 28.3084 6.90923   1
   2   3  13 344.321 24.3359   1
   3   3  13 568.145 31.7500   1
   4   3  13 704.821 24.6434   1
   5   3  13 196.542 21.6564   1
   6   3  13 1.04386 14.8160   1
  11  -7  13 213.969 28.9359  -2
 -11   4  13 213.969 28.9359   1
  -9   4  13 17.4460 14.9251   1
  -8   4  13 123.594 38.6187   1
  -7   4  13 39.4808 16.0779   1
  -6   4  13 14.7444 11.0696   1
  -5   4  13 187.111 37.3849   1
  -4   4  13 33.7966 15.4616   1
  -3   4  13 92.4377 7.63801   1
  -2   4  13 148.578 10.2743   1
  -1   4  13 154.400 15.4654   1
   0   4  13 380.615 24.1497   1
   1   4  13 -0.4360 4.27551   1
   2   4  13 102.904 16.0270   1
   3   4  13 319.539 25.6338   1
   4   4  13 343.727 26.1481   1
   5   4  13 73.7932 10.1181   1
 -11   5  13 2.50776 5.80618   1
  -9   5  13 95.7990 35.1643   1
  -8   5  13 34.6944 17.0679   1
  -7   5  13 19.1644 13.2114   1
  -6   5  13 25.6532 15.3969   1
  -5   5  13 24.8510 3.71154   1
  -4   5  13 17.2053 3.31976   1
  -3   5  13 46.1673 9.22946   1
  -2   5  13 16.8395 5.35868   1
  -1   5  13 333.813 22.7025   1
   0   5  13 189.506 18.2317   1
   1   5  13 26.5067 7.35981   1
   2   5  13 40.2870 9.63452   1
   3   5  13 138.533 18.9077   1
   4   5  13 75.6074 11.6150   1
 -10   6  13 -1.3144 11.5282   1
  -9   6  13 5.37501 11.2726   1
  -8   6  13 -14.987 12.5832   1
  -7   6  13 78.8622 38.7560   1
  -6   6  13 182.248 12.3583   1
  -5   6  13 1.86409 2.73846   1
  -4   6  13 26.4979 5.49303   1
  -3   6  13 15.1720 5.68476   1
  -2   6  13 27.3111 6.84394   1
  -1   6  13 73.6053 15.6188   1
   0   6  13 65.1842 13.0598   1
   1   6  13 9.11898 6.31579   1
   2   6  13 -0.8741 5.00476   1
  -9   7  13 8.25903 13.3489   1
  -8   7  13 176.413 41.7362   1
  -7   7  13 310.502 14.4153   1
  -6   7  13 146.484 12.5192   1
  -5   7  13 0.48546 4.16117   1
  -4   7  13 -3.4371 4.17815   1
  -3   7  13 17.6406 6.52760   1
  -2   7  13 -0.9960 4.79857   1
  -1   7  13 19.4475 6.36207   1
   0   7  13 8.37275 10.2089   1
  -8   8  13 29.8602 6.62885   1
  -7   8  13 279.763 15.6735   1
  -6   8  13 162.963 40.7341   1
  -5   8  13 15.5690 5.14117   1
  -4   8  13 6.37126 4.99034   1
  -3   8  13 -0.2911 5.32370   1
  -2   8  13 0.23546 4.20204   1
   3 -15  14 -4.1817 4.53928   1
   4 -15  14 -6.4088 4.05871   1
   5 -15  14 9.51337 3.11361   1
  -7  -8  14 413.164 46.9148  -2
   6 -15  14 413.164 46.9148   1
  -8  -7  14 627.947 55.2234  -2
   7 -15  14 627.947 55.2234   1
   0 -14  14 76.9293 9.10784   1
   1 -14  14 6.74759 2.23383   1
  -2 -12  14 -10.986 31.7718  -2
   2 -14  14 -10.986 31.7718   1
   3 -14  14 71.7652 9.28722   1
   4 -14  14 113.216 10.5999   1
   5 -14  14 -2.8658 2.98261   1
   6 -14  14 155.670 13.6030   1
   7 -14  14 507.279 22.3033   1
   8 -14  14 188.824 28.4658   1
   9 -14  14 3.66584 8.04804   1
  -1 -13  14 1.49130 2.75560   1
   0 -13  14 44.5132 30.3390  -2
   0 -13  14 44.5132 30.3390   1
   1 -13  14 4.98711 3.77518   1
   2 -13  14 319.630 15.3125   1
   3 -13  14 708.948 23.4306   1
   4 -13  14 444.344 20.1532   1
   5 -13  14 -1.8714 4.48225   1
  -6  -7  14 309.572 29.1365  -2
   6 -13  14 309.572 29.1365   1
  -7  -6  14 562.961 47.7036  -2
   7 -13  14 562.961 47.7036   1
  -8  -5  14 699.374 53.1275  -2
   8 -13  14 699.374 53.1275   1
  -9  -4  14 19.7839 27.2291  -2
   9 -13  14 19.7839 27.2291   1
 -10  -3  14 21.5327 26.1480  -2
  10 -13  14 21.5327 26.1480   1
   3 -15  14 -38.618 28.3869  -2
  -3 -12  14 -38.618 28.3869   1
  -2 -12  14 -4.2339 3.00767   1
   1 -13  14 -12.458 27.1971  -2
  -1 -12  14 -12.458 27.1971   1
   0 -12  14 6.44553 3.95867   1
   1 -12  14 10.9479 3.88098   1
   2 -12  14 320.892 17.7349   1
  -3  -9  14 732.114 50.9729  -2
   3 -12  14 732.114 50.9729   1
  -4  -8  14 610.758 47.0621  -2
   4 -12  14 610.758 47.0621   1
  -5  -7  14 69.5507 26.2960  -2
   5 -12  14 69.5507 26.2960   1
  -8  -4  14 143.547 29.4981  -2
   8 -12  14 143.547 29.4981   1
  -9  -3  14 -8.5229 22.9971  -2
   9 -12  14 -8.5229 22.9971   1
 -10  -2  14 26.7455 24.8927  -2
  10 -12  14 26.7455 24.8927   1
   4 -15  14 18.6737 29.0811  -2
  -4 -11  14 18.6737 29.0811   1
   3 -14  14 90.5386 30.5135  -2
  -3 -11  14 90.5386 30.5135   1
  -2 -11  14 71.2359 10.5143   1
  -1 -11  14 59.7439 10.3910   1
   0 -11  14 157.590 30.1160  -2
   0 -11  14 157.590 30.1160   1
  -1 -10  14 21.6398 23.7707  -2
   1 -11  14 21.6398 23.7707   1
  -2  -9  14 322.432 33.7906  -2
   2 -11  14 322.432 33.7906   1
  -3  -8  14 722.413 24.9611  -2
   3 -11  14 722.413 24.9611   1
  -4  -7  14 805.163 32.9168  -2
   4 -11  14 805.163 32.9168   1
  -5  -6  14 29.9955 20.3507  -2
   5 -11  14 29.9955 20.3507   1
  -6  -5  14 131.934 25.2355  -2
   6 -11  14 131.934 25.2355   1
  -7  -4  14 158.301 27.2354  -2
   7 -11  14 158.301 27.2354   1
  -9  -2  14 89.6744 15.6886  -2
   9 -11  14 89.6744 15.6886   1
 -10  -1  14 334.208 25.6019  -2
  10 -11  14 334.208 25.6019   1
 -11   0  14 345.835 26.8370  -2
  11 -11  14 345.835 26.8370   1
  -5 -10  14 18.3899 4.78134   1
   4 -14  14 119.581 29.5304  -2
  -4 -10  14 119.581 29.5304   1
  -3 -10  14 107.379 11.5022   1
   2 -12  14 275.241 20.6266  -2
  -2 -10  14 275.241 20.6266   1
   1 -11  14 25.2012 12.5562  -2
  -1 -10  14 25.2012 12.5562   1
   0 -10  14 238.071 18.5700  -2
   0 -10  14 238.071 18.5700   1
  -1  -9  14 51.7560 11.0566  -2
   1 -10  14 51.7560 11.0566   1
  -2  -8  14 124.149 12.4694  -2
   2 -10  14 124.149 12.4694   1
  -3  -7  14 566.084 26.9727  -2
   3 -10  14 566.084 26.9727   1
  -4  -6  14 163.973 26.5692  -2
   4 -10  14 163.973 26.5692   1
  -5  -5  14 -18.928 17.1546  -2
   5 -10  14 -18.928 17.1546   1
  -6  -4  14 -13.352 14.7847  -2
   6 -10  14 -13.352 14.7847   1
  -7  -3  14 -4.9716 17.2802  -2
   7 -10  14 -4.9716 17.2802   1
  -8  -2  14 12.4810 11.4246  -2
   8 -10  14 12.4810 11.4246   1
  -9  -1  14 31.3752 17.0908  -2
   9 -10  14 31.3752 17.0908   1
 -10   0  14 374.358 38.3424  -2
  10 -10  14 374.358 38.3424   1
 -11   1  14 598.327 50.3004  -2
  11 -10  14 598.327 50.3004   1
  -6  -9  14 6.46389 3.05637   1
  -5  -9  14 5.75569 3.77473   1
  -4  -9  14 295.154 16.7049   1
   3 -12  14 706.082 28.7389  -2
  -3  -9  14 706.082 28.7389   1
   2 -11  14 226.601 17.5645  -2
  -2  -9  14 226.601 17.5645   1
   1 -10  14 83.4677 13.2664  -2
  -1  -9  14 83.4677 13.2664   1
   0  -9  14 378.114 20.9456  -2
   0  -9  14 378.114 20.9456   1
  -1  -8  14 30.7906 17.9888  -2
   1  -9  14 30.7906 17.9888   1
  -2  -7  14 239.793 17.0478  -2
   2  -9  14 239.793 17.0478   1
  -3  -6  14 104.473 19.7479  -2
   3  -9  14 104.473 19.7479   1
  -4  -5  14 35.6082 14.6228  -2
   4  -9  14 35.6082 14.6228   1
  -5  -4  14 27.6580 12.6118  -2
   5  -9  14 27.6580 12.6118   1
  -6  -3  14 51.8999 13.9991  -2
   6  -9  14 51.8999 13.9991   1
  -7  -2  14 221.255 15.8526  -2
   7  -9  14 221.255 15.8526   1
  -8  -1  14 25.9727 13.2007  -2
   8  -9  14 25.9727 13.2007   1
 -10   1  14 635.237 49.7681  -2
  10  -9  14 635.237 49.7681   1
 -11   2  14 452.799 45.7217  -2
  11  -9  14 452.799 45.7217   1
  -7  -8  14 281.750 17.5870   1
  -6  -8  14 121.412 12.4675   1
   5 -13  14 142.499 18.5989  -2
  -5  -8  14 142.499 18.5989   1
   4 -12  14 544.195 24.0864  -2
  -4  -8  14 544.195 24.0864   1
   3 -11  14 612.215 25.4805  -2
  -3  -8  14 612.215 25.4805   1
   2 -10  14 114.108 13.2815  -2
  -2  -8  14 114.108 13.2815   1
   1  -9  14 -5.4546 9.76517  -2
  -1  -8  14 -5.4546 9.76517   1
   0  -8  14 0.86204 10.0466  -2
   0  -8  14 0.86204 10.0466   1
  -1  -7  14 31.1736 15.5231  -2
   1  -8  14 31.1736 15.5231   1
  -2  -6  14 21.4262 16.1727  -2
   2  -8  14 21.4262 16.1727   1
  -3  -5  14 18.1326 14.2234  -2
   3  -8  14 18.1326 14.2234   1
  -4  -4  14 362.591 25.2609  -2
   4  -8  14 362.591 25.2609   1
  -5  -3  14 210.115 17.2482  -2
   5  -8  14 210.115 17.2482   1
  -6  -2  14 152.347 17.8612  -2
   6  -8  14 152.347 17.8612   1
  -7  -1  14 296.367 24.1021  -2
   7  -8  14 296.367 24.1021   1
  -8   0  14 146.897 19.6988  -2
   8  -8  14 146.897 19.6988   1
  -9   1  14 248.287 21.8916  -2
   9  -8  14 248.287 21.8916   1
 -10   2  14 196.743 31.8048  -2
  10  -8  14 196.743 31.8048   1
 -11   3  14 272.683 28.7918  -2
  11  -8  14 272.683 28.7918   1
  -8  -7  14 478.774 21.9300   1
   7 -14  14 895.012 40.2050  -2
  -7  -7  14 895.012 40.2050   1
   6 -13  14 277.440 28.7704  -2
  -6  -7  14 277.440 28.7704   1
  -5  -7  14 -3.1087 12.9970   1
   4 -11  14 863.397 29.1756  -2
  -4  -7  14 863.397 29.1756   1
   3 -10  14 533.096 21.3514  -2
  -3  -7  14 533.096 21.3514   1
   2  -9  14 260.980 14.8929  -2
  -2  -7  14 260.980 14.8929   1
   1  -8  14 50.0885 15.6798  -2
  -1  -7  14 50.0885 15.6798   1
   0  -7  14 64.7537 15.1572  -2
   0  -7  14 64.7537 15.1572   1
  -1  -6  14 289.541 23.3099  -2
   1  -7  14 289.541 23.3099   1
  -2  -5  14 168.584 21.0376  -2
   2  -7  14 168.584 21.0376   1
  -3  -4  14 482.515 27.6093  -2
   3  -7  14 482.515 27.6093   1
  -4  -3  14 704.136 29.3922  -2
   4  -7  14 704.136 29.3922   1
  -5  -2  14 294.157 22.5355  -2
   5  -7  14 294.157 22.5355   1
  -6  -1  14 127.573 22.9153  -2
   6  -7  14 127.573 22.9153   1
  -7   0  14 252.547 22.5651  -2
   7  -7  14 252.547 22.5651   1
  -8   1  14 56.4318 17.4683  -2
   8  -7  14 56.4318 17.4683   1
  -9   2  14 208.703 21.8807  -2
   9  -7  14 208.703 21.8807   1
 -10   3  14 113.950 26.7617  -2
  10  -7  14 113.950 26.7617   1
  11  -7  14 32.3429 9.04973   1
   8 -14  14 307.715 22.1703  -2
  -8  -6  14 307.715 22.1703   1
   7 -13  14 707.054 25.5519  -2
  -7  -6  14 707.054 25.5519   1
   6 -12  14 153.112 12.6698  -2
  -6  -6  14 153.112 12.6698   1
   5 -11  14 1.26393 9.76903  -2
  -5  -6  14 1.26393 9.76903   1
   4 -10  14 158.106 11.9905  -2
  -4  -6  14 158.106 11.9905   1
   3  -9  14 45.0571 9.74348  -2
  -3  -6  14 45.0571 9.74348   1
   2  -8  14 -1.2429 7.94007  -2
  -2  -6  14 -1.2429 7.94007   1
   1  -7  14 261.153 14.3809  -2
  -1  -6  14 261.153 14.3809   1
   0  -6  14 915.494 30.0175  -2
   0  -6  14 915.494 30.0175   1
  -1  -5  14 804.246 27.6538  -2
   1  -6  14 804.246 27.6538   1
  -2  -4  14 314.398 22.7882  -2
   2  -6  14 314.398 22.7882   1
  -3  -3  14 360.709 24.0017  -2
   3  -6  14 360.709 24.0017   1
  -4  -2  14 1206.30 40.4141  -2
   4  -6  14 1206.30 40.4141   1
  -5  -1  14 455.858 27.6178  -2
   5  -6  14 455.858 27.6178   1
  -6   0  14 154.943 25.5782  -2
   6  -6  14 154.943 25.5782   1
  -7   1  14 85.5817 18.6671  -2
   7  -6  14 85.5817 18.6671   1
  -8   2  14 15.2681 17.0264  -2
   8  -6  14 15.2681 17.0264   1
  -9   3  14 39.7985 20.0854  -2
   9  -6  14 39.7985 20.0854   1
 -10   4  14 84.7371 34.8902  -2
  10  -6  14 84.7371 34.8902   1
  -9  -5  14 -1.6846 16.2724   1
   8 -13  14 638.546 27.9571  -2
  -8  -5  14 638.546 27.9571   1
   7 -12  14 563.841 20.8370  -2
  -7  -5  14 563.841 20.8370   1
   6 -11  14 104.326 11.6829  -2
  -6  -5  14 104.326 11.6829   1
   5 -10  14 -2.5700 6.94695  -2
  -5  -5  14 -2.5700 6.94695   1
   4  -9  14 2.45266 6.41895  -2
  -4  -5  14 2.45266 6.41895   1
   3  -8  14 8.44169 6.67159  -2
  -3  -5  14 8.44169 6.67159   1
   2  -7  14 129.720 8.06734  -2
  -2  -5  14 129.720 8.06734   1
   1  -6  14 642.966 28.8752  -2
  -1  -5  14 642.966 28.8752   1
   0  -5  14 3087.64 90.3522  -2
   0  -5  14 3087.64 90.3522   1
[truncated: 71,964 more chars]
