# Supplementary material
Source: publisher figshare collection journal article supplement (https://acs.figshare.com/ndownloader/files/22494656)
Supplement: Supplementary file 1 [file 22494656 › CIF/1X.cif]

data_1x
_audit_creation_date               2019-03-12
_audit_creation_method
;
Olex2 1.2
(compiled 2018.05.29 svn.r3508 for OlexSys, GUI svn.r5506)
;
_shelx_SHELXL_version_number       '2016/6'
_audit_contact_author_address      ?
_audit_contact_author_email        ?
_audit_contact_author_name         ''
_audit_contact_author_phone        ?
_publ_contact_author_id_orcid      ?
_publ_section_references
;
Dolomanov, O.V., Bourhis, L.J., Gildea, R.J, Howard, J.A.K. & Puschmann, H.
 (2009), J. Appl. Cryst. 42, 339-341.

Sheldrick, G.M. (2008). Acta Cryst. A64, 112-122.
;
_chemical_name_common              ?
_chemical_name_systematic          ?
_chemical_formula_moiety          
 'C22 H17 Cu I N3 O, 0.36(C7 H5 N), 0.64(C7 H6 N)'
_chemical_formula_sum              'C29 H22.64 Cu I N4 O'
_chemical_formula_weight           633.59
_chemical_melting_point            ?
loop_
  _atom_type_symbol
  _atom_type_description
  _atom_type_scat_dispersion_real
  _atom_type_scat_dispersion_imag
  _atom_type_scat_source
 'C' 'C' 0.0033 0.0016 'International Tables Vol C Tables 4.2.6.8 and 6.1.1.4'
 'H' 'H' 0.0000 0.0000 'International Tables Vol C Tables 4.2.6.8 and 6.1.1.4'
 'Cu' 'Cu' 0.3201 1.2651 'International Tables Vol C Tables 4.2.6.8 and 6.1.1.4'
 'I' 'I' -0.4742 1.8119 'International Tables Vol C Tables 4.2.6.8 and 6.1.1.4'
 'N' 'N' 0.0061 0.0033 'International Tables Vol C Tables 4.2.6.8 and 6.1.1.4'
 'O' 'O' 0.0106 0.0060 'International Tables Vol C Tables 4.2.6.8 and 6.1.1.4'

_shelx_space_group_comment
;
The symmetry employed for this shelxl refinement is uniquely defined
by the following loop, which should always be used as a source of
symmetry information in preference to the above space-group names.
They are only intended as comments.
;
_space_group_crystal_system        'monoclinic'
_space_group_IT_number             15
_space_group_name_H-M_alt          'C 1 2/c 1'
_space_group_name_Hall             '-C 2yc'
loop_
  _space_group_symop_operation_xyz
 'x, y, z'
 '-x, y, -z+1/2'
 'x+1/2, y+1/2, z'
 '-x+1/2, y+1/2, -z+1/2'
 '-x, -y, -z'
 'x, -y, z-1/2'
 '-x+1/2, -y+1/2, -z'
 'x+1/2, -y+1/2, z-1/2'

_cell_length_a                     24.2935(9)
_cell_length_b                     12.6330(5)
_cell_length_c                     17.7632(6)
_cell_angle_alpha                  90
_cell_angle_beta                   113.0070(10)
_cell_angle_gamma                  90
_cell_volume                       5017.9(3)
_cell_formula_units_Z              8
_cell_measurement_reflns_used      9951
_cell_measurement_temperature      100(2)
_cell_measurement_theta_max        25.34
_cell_measurement_theta_min        2.42
_shelx_estimated_absorpt_T_max     0.618
_shelx_estimated_absorpt_T_min     0.523
_exptl_absorpt_coefficient_mu      2.131
_exptl_absorpt_correction_T_max    0.7452
_exptl_absorpt_correction_T_min    0.5210
_exptl_absorpt_correction_type     multi-scan
_exptl_absorpt_process_details    
 'SADABS-2016/2 (Bruker,2016/2) was used for absorption correction. wR2(int) was 0.1423 before and 0.0847 after correction. The Ratio of minimum to maximum transmission is 0.6991. The \l/2 correction factor is Not present.'
_exptl_absorpt_special_details     ?
_exptl_crystal_colour              'dull dark red'
_exptl_crystal_colour_lustre       dull
_exptl_crystal_colour_modifier     dark
_exptl_crystal_colour_primary      red
_exptl_crystal_density_diffrn      1.677
_exptl_crystal_density_meas        ?
_exptl_crystal_density_method      ?
_exptl_crystal_description         block
_exptl_crystal_F_000               2517
_exptl_crystal_size_max            0.35
_exptl_crystal_size_mid            0.25
_exptl_crystal_size_min            0.25
_exptl_transmission_factor_max     ?
_exptl_transmission_factor_min     ?
_diffrn_reflns_av_R_equivalents    0.0674
_diffrn_reflns_av_unetI/netI       0.0441
_diffrn_reflns_Laue_measured_fraction_full  0.999
_diffrn_reflns_Laue_measured_fraction_max  0.998
_diffrn_reflns_limit_h_max         29
_diffrn_reflns_limit_h_min         -29
_diffrn_reflns_limit_k_max         15
_diffrn_reflns_limit_k_min         -15
_diffrn_reflns_limit_l_max         21
_diffrn_reflns_limit_l_min         -20
_diffrn_reflns_number              24478
_diffrn_reflns_point_group_measured_fraction_full  0.999
_diffrn_reflns_point_group_measured_fraction_max  0.998
_diffrn_reflns_theta_full          25.242
_diffrn_reflns_theta_max           25.367
_diffrn_reflns_theta_min           2.422
_diffrn_ambient_temperature        100
_diffrn_detector_area_resol_mean   ?
_diffrn_measured_fraction_theta_full  0.999
_diffrn_measured_fraction_theta_max  0.998
_diffrn_measurement_device_type    'Bruker APEX-II CCD'
_diffrn_measurement_method         '\f and \w scans'
_diffrn_radiation_type             MoK\a
_diffrn_radiation_wavelength       0.71073
_diffrn_source                     ?
_reflns_Friedel_coverage           0.000
_reflns_Friedel_fraction_full      .
_reflns_Friedel_fraction_max       .
_reflns_number_gt                  3920
_reflns_number_total               4606
_reflns_special_details
;
 Reflections were merged by SHELXL according to the crystal
 class for the calculation of statistics and refinement.
 
 _reflns_Friedel_fraction is defined as the number of unique
 Friedel pairs measured divided by the number that would be
 possible theoretically, ignoring centric projections and
 systematic absences.
;
_reflns_threshold_expression       'I > 2\s(I)'
_computing_cell_refinement         'SAINT V8.38A (?, 2016)'
_computing_data_collection         ?
_computing_data_reduction          'SAINT V8.38A (?, 2016)'
_computing_molecular_graphics      'Olex2 (Dolomanov et al., 2009)'
_computing_publication_material    'Olex2 (Dolomanov et al., 2009)'
_computing_structure_refinement    'XL (Sheldrick, 2008)'
_computing_structure_solution      'ShelXS (Sheldrick, 2008)'
_refine_diff_density_max           2.098
_refine_diff_density_min           -4.974
_refine_diff_density_rms           0.190
_refine_ls_extinction_coef         0.00067(18)
_refine_ls_extinction_expression  
 'Fc^*^=kFc[1+0.001xFc^2^\l^3^/sin(2\q)]^-1/4^'
_refine_ls_extinction_method       'SHELXL-2016/6 (Sheldrick 2016)'
_refine_ls_goodness_of_fit_ref     1.047
_refine_ls_hydrogen_treatment      constr
_refine_ls_matrix_type             full
_refine_ls_number_parameters       321
_refine_ls_number_reflns           4606
_refine_ls_number_restraints       1
_refine_ls_R_factor_all            0.0779
_refine_ls_R_factor_gt             0.0662
_refine_ls_restrained_S_all        1.048
_refine_ls_shift/su_max            0.003
_refine_ls_shift/su_mean           0.000
_refine_ls_structure_factor_coef   Fsqd
_refine_ls_weighting_details      
 'w=1/[\s^2^(Fo^2^)+(0.1038P)^2^+83.0086P] where P=(Fo^2^+2Fc^2^)/3'
_refine_ls_weighting_scheme        calc
_refine_ls_wR_factor_gt            0.1755
_refine_ls_wR_factor_ref           0.1907
_refine_special_details            ?
_olex2_refinement_description
;
1. Fixed Uiso
 At 1.2 times of:
  All C(H) groups, All C(H,H) groups
 At 1.5 times of:
  All C(H,H,H) groups
2. Restrained distances
 N4A-C29B
 1.3 with sigma of 0.02
3. Uiso/Uaniso restraints and constraints
Uanis(C23A) = Uanis(C25A)
Uanis(C25B) = Uanis(C24B)
Uanis(C23B) = Uanis(C25B)
Uanis(C26B) = Uanis(C28B) = Uanis(C24B)
Uanis(C25A) = Uanis(C24A)
Uanis(C27A) = Uanis(C25B)
Uanis(C28A) = Uanis(C27A)
Uanis(N4A) = Uanis(N2)
4. Others
 Fixed Sof: C29A(0.35839) N4B(0.35839) C23A(0.35839) H23A(0.35839)
 C24A(0.35839) H24A(0.35839) C25A(0.35839) H25A(0.35839) C26A(0.35839)
 C27A(0.35839) H27A(0.35839) C28A(0.35839) H28A(0.35839) C26B(0.64161)
 C27B(0.64161) H27B(0.64161) C28B(0.64161) C23B(0.64161) H23B(0.64161)
 C24B(0.64161) H24B(0.64161) C25B(0.64161) H25B(0.64161) C29B(0.64161)
 H29A(0.64161) H29B(0.64161) N4A(0.64161)
5.a Secondary CH2 refined with riding coordinates:
 C29B(H29A,H29B)
5.b Aromatic/amide H refined with riding coordinates:
 C10(H10), C5(H5), C4(H4), C20(H20), C19(H19), C8(H8), C2(H2), C1(H1),
 C22(H22), C16(H16), C21(H21), C12(H12), C15(H15), C13(H13), C23A(H23A),
 C24A(H24A), C25A(H25A), C27A(H27A), C28A(H28A), C27B(H27B), C23B(H23B),
 C24B(H24B), C25B(H25B)
5.c Fitted hexagon refined as free rotating group:
 C23A(C24A,C25A,C26A,C27A,C28A), C26B(C27B,C28B,C23B,C24B,C25B)
5.d Idealised Me refined as rotating group:
 C17(H17A,H17B,H17C)
;
_atom_sites_solution_hydrogens     geom
_atom_sites_solution_primary       direct
_atom_sites_solution_secondary     ?
loop_
  _atom_site_label
  _atom_site_type_symbol
  _atom_site_fract_x
  _atom_site_fract_y
  _atom_site_fract_z
  _atom_site_U_iso_or_equiv
  _atom_site_adp_type
  _atom_site_occupancy
  _atom_site_site_symmetry_order
  _atom_site_calc_flag
  _atom_site_refinement_flags_posn
  _atom_site_refinement_flags_adp
  _atom_site_refinement_flags_occupancy
  _atom_site_disorder_assembly
  _atom_site_disorder_group
 I1 I 0.45828(2) 0.64339(4) 1.03895(3) 0.0372(2) Uani 1 1 d . . . . .
 Cu1 Cu 0.49799(4) 0.55242(7) 0.93487(5) 0.0294(3) Uani 1 1 d . . . . .
 N1 N 0.4300(2) 0.5524(5) 0.8236(3) 0.0303(12) Uani 1 1 d . . . . .
 N3 N 0.0687(3) 0.8543(5) 0.4456(4) 0.0301(13) Uani 1 1 d . . . . .
 N2 N 0.2478(3) 0.6162(6) 0.5648(5) 0.0481(14) Uani 1 1 d . . . . .
 O1 O 0.2112(4) 0.1197(5) 0.2298(4) 0.062(2) Uani 1 1 d . . . . .
 C10 C 0.2830(3) 0.4511(6) 0.5350(4) 0.0302(14) Uani 1 1 d . . . . .
 H10 H 0.311755 0.395893 0.552968 0.036 Uiso 1 1 calc R . . . .
 C6 C 0.2876(3) 0.5374(5) 0.5848(4) 0.0266(13) Uani 1 1 d . . . . .
 C9 C 0.2360(3) 0.4448(5) 0.4586(4) 0.0288(14) Uani 1 1 d . . . . .
 C5 C 0.4321(3) 0.4864(6) 0.7664(4) 0.0347(16) Uani 1 1 d . . . . .
 H5 H 0.465645 0.440618 0.779949 0.042 Uiso 1 1 calc R . . . .
 C4 C 0.3880(3) 0.4809(7) 0.6879(4) 0.0358(16) Uani 1 1 d . . . . .
 H4 H 0.391991 0.433390 0.648877 0.043 Uiso 1 1 calc R . . . .
 C3 C 0.3381(3) 0.5450(5) 0.6671(4) 0.0277(14) Uani 1 1 d . . . . .
 C20 C 0.1167(3) 0.8486(6) 0.5163(5) 0.0358(17) Uani 1 1 d . . . . .
 H20 H 0.120591 0.899331 0.557519 0.043 Uiso 1 1 calc R . . . .
 C19 C 0.1607(3) 0.7730(6) 0.5322(4) 0.0334(16) Uani 1 1 d . . . . .
 H19 H 0.193673 0.772412 0.583574 0.040 Uiso 1 1 calc R . . . .
 C8 C 0.1952(3) 0.5291(5) 0.4374(4) 0.0280(14) Uani 1 1 d . . . . .
 H8 H 0.162717 0.529781 0.385574 0.034 Uiso 1 1 calc R . . . .
 C18 C 0.1571(3) 0.6978(6) 0.4735(4) 0.0292(14) Uani 1 1 d . . . . .
 C2 C 0.3357(3) 0.6142(6) 0.7255(4) 0.0307(14) Uani 1 1 d . . . . .
 H2 H 0.302535 0.660396 0.713398 0.037 Uiso 1 1 calc R . . . .
 C7 C 0.2022(3) 0.6115(6) 0.4919(4) 0.0276(14) Uani 1 1 d . . . . .
 C1 C 0.3822(3) 0.6162(6) 0.8025(4) 0.0335(15) Uani 1 1 d . . . . .
 H1 H 0.379971 0.665132 0.841812 0.040 Uiso 1 1 calc R . . . .
 C22 C 0.1090(3) 0.7070(6) 0.3990(4) 0.0386(17) Uani 1 1 d . . . . .
 H22 H 0.105285 0.659871 0.355581 0.046 Uiso 1 1 calc R . . . .
 C11 C 0.2296(3) 0.3559(5) 0.4021(4) 0.0312(15) Uani 1 1 d . . . . .
 C16 C 0.2793(4) 0.2979(6) 0.4062(5) 0.0375(17) Uani 1 1 d . . . . .
 H16 H 0.317079 0.313609 0.448024 0.045 Uiso 1 1 calc R . . . .
 C21 C 0.0665(4) 0.7846(6) 0.3878(5) 0.0395(18) Uani 1 1 d . . . . .
 H21 H 0.033866 0.788652 0.336235 0.047 Uiso 1 1 calc R . . . .
 C14 C 0.2209(5) 0.1953(6) 0.2897(5) 0.046(2) Uani 1 1 d . . . . .
 C12 C 0.1746(4) 0.3292(7) 0.3401(5) 0.0435(19) Uani 1 1 d . . . . .
 H12 H 0.139574 0.365941 0.336423 0.052 Uiso 1 1 calc R . . . .
 C15 C 0.2752(4) 0.2175(6) 0.3507(5) 0.0423(19) Uani 1 1 d . . . . .
 H15 H 0.309752 0.178425 0.355072 0.051 Uiso 1 1 calc R . . . .
 C13 C 0.1704(4) 0.2508(7) 0.2844(5) 0.048(2) Uani 1 1 d . . . . .
 H13 H 0.132760 0.234702 0.242310 0.057 Uiso 1 1 calc R . . . .
 C17 C 0.2617(6) 0.0550(9) 0.2379(8) 0.079(4) Uani 1 1 d . . . . .
 H17A H 0.248969 -0.002222 0.197475 0.119 Uiso 1 1 calc GR . . . .
 H17B H 0.278782 0.024747 0.293037 0.119 Uiso 1 1 calc GR . . . .
 H17C H 0.291983 0.098362 0.228682 0.119 Uiso 1 1 calc GR . . . .
 C29A C 0.0214(14) 0.632(3) 0.740(2) 0.065(8) Uani 0.3584 1 d . . P A 1
 N4B N 0.0375(14) 0.583(3) 0.819(2) 0.089(9) Uani 0.3584 1 d . . P A 1
 C23A C 0.0727(13) 0.4406(14) 0.5792(14) 0.067(5) Uani 0.3584 1 d . . P A 1
 H23A H 0.085999 0.400006 0.544456 0.081 Uiso 0.3584 1 calc R . P A 1
 C24A C 0.0730(10) 0.5505(15) 0.5755(13) 0.067(5) Uani 0.3584 1 d G . P A 1
 H24A H 0.086440 0.585020 0.538373 0.081 Uiso 0.3584 1 calc R . P A 1
 C25A C 0.0535(10) 0.6098(11) 0.6263(14) 0.067(5) Uani 0.3584 1 d G . P A 1
 H25A H 0.053696 0.684941 0.623848 0.081 Uiso 0.3584 1 calc R . P A 1
 C26A C 0.0338(8) 0.5593(14) 0.6807(11) 0.056(7) Uani 0.3584 1 d G . P A 1
 C27A C 0.0335(13) 0.4494(15) 0.6843(14) 0.102(3) Uani 0.3584 1 d G . P A 1
 H27A H 0.020068 0.414836 0.721490 0.123 Uiso 0.3584 1 calc R . P A 1
 C28A C 0.0530(16) 0.3900(11) 0.6335(18) 0.102(3) Uani 0.3584 1 d G . P A 1
 H28A H 0.052812 0.314912 0.636016 0.123 Uiso 0.3584 1 calc R . P A 1
 C26B C 0.0811(10) 0.4761(11) 0.5906(9) 0.102(3) Uani 0.6416 1 d . . P B 2
 C27B C 0.0903(9) 0.5748(9) 0.6281(8) 0.089(7) Uani 0.6416 1 d G . P B 2
 H27B H 0.101128 0.633485 0.603479 0.106 Uiso 0.6416 1 calc R . P B 2
 C28B C 0.0835(9) 0.5875(8) 0.7018(8) 0.102(3) Uani 0.6416 1 d G . P B 2
 C23B C 0.0676(9) 0.5016(11) 0.7379(8) 0.102(3) Uani 0.6416 1 d G . P B 2
 H23B H 0.062953 0.510285 0.788192 0.123 Uiso 0.6416 1 calc R . P B 2
 C24B C 0.0585(9) 0.4029(9) 0.7003(10) 0.102(3) Uani 0.6416 1 d G . P B 2
 H24B H 0.047595 0.344177 0.724992 0.123 Uiso 0.6416 1 calc R . P B 2
 C25B C 0.0652(10) 0.3902(8) 0.6267(11) 0.102(3) Uani 0.6416 1 d G . P B 2
 H25B H 0.059004 0.322721 0.601035 0.123 Uiso 0.6416 1 calc R . P B 2
 C29B C 0.0844(8) 0.4444(12) 0.5156(11) 0.067(4) Uani 0.6416 1 d D . P B 2
 H29A H 0.077133 0.508421 0.480907 0.081 Uiso 0.6416 1 calc R . P B 2
 H29B H 0.126163 0.422408 0.528342 0.081 Uiso 0.6416 1 calc R . P B 2
 N4A N 0.0483(5) 0.3665(9) 0.4685(7) 0.0481(14) Uani 0.6416 1 d D . P B 2

loop_
  _atom_site_aniso_label
  _atom_site_aniso_U_11
  _atom_site_aniso_U_22
  _atom_site_aniso_U_33
  _atom_site_aniso_U_23
  _atom_site_aniso_U_13
  _atom_site_aniso_U_12
 I1 0.0481(4) 0.0336(3) 0.0395(3) 0.00812(19) 0.0277(3) 0.01052(19)
 Cu1 0.0290(5) 0.0326(5) 0.0273(5) 0.0025(3) 0.0119(4) -0.0020(3)
 N1 0.026(3) 0.035(3) 0.029(3) -0.002(2) 0.009(2) -0.002(2)
 N3 0.026(3) 0.037(3) 0.029(3) -0.002(2) 0.012(2) 0.000(2)
 N2 0.050(4) 0.049(3) 0.051(4) -0.002(3) 0.026(3) -0.001(3)
 O1 0.116(6) 0.041(3) 0.040(3) -0.016(3) 0.041(4) -0.018(4)
 C10 0.037(4) 0.029(3) 0.027(3) 0.003(3) 0.015(3) 0.002(3)
 C6 0.028(3) 0.027(3) 0.026(3) 0.003(3) 0.012(3) 0.002(3)
 C9 0.034(4) 0.029(3) 0.029(3) 0.003(3) 0.019(3) -0.001(3)
 C5 0.030(4) 0.043(4) 0.035(4) -0.005(3) 0.017(3) 0.007(3)
 C4 0.035(4) 0.048(4) 0.028(3) -0.005(3) 0.017(3) 0.005(3)
 C3 0.030(3) 0.029(3) 0.030(3) 0.000(3) 0.018(3) -0.002(3)
 C20 0.030(4) 0.046(4) 0.030(4) -0.011(3) 0.009(3) 0.000(3)
 C19 0.026(3) 0.043(4) 0.026(3) -0.006(3) 0.005(3) 0.004(3)
 C8 0.028(3) 0.028(3) 0.027(3) 0.000(3) 0.010(3) 0.000(3)
 C18 0.026(3) 0.033(4) 0.032(3) 0.000(3) 0.014(3) 0.000(3)
 C2 0.028(3) 0.028(3) 0.032(4) -0.001(3) 0.008(3) 0.005(3)
 C7 0.026(3) 0.034(4) 0.026(3) 0.002(3) 0.013(3) 0.000(3)
 C1 0.038(4) 0.031(4) 0.032(4) -0.006(3) 0.014(3) -0.001(3)
 C22 0.041(4) 0.046(4) 0.024(3) -0.012(3) 0.008(3) 0.004(3)
 C11 0.042(4) 0.031(4) 0.026(3) 0.002(3) 0.019(3) -0.008(3)
 C16 0.044(4) 0.032(4) 0.046(4) -0.005(3) 0.027(4) -0.006(3)
 C21 0.042(4) 0.044(4) 0.028(3) -0.012(3) 0.008(3) 0.009(3)
 C14 0.087(7) 0.028(4) 0.036(4) -0.003(3) 0.038(4) -0.006(4)
 C12 0.051(5) 0.038(4) 0.034(4) 0.001(3) 0.009(4) 0.004(4)
 C15 0.057(5) 0.038(4) 0.047(5) -0.005(4) 0.037(4) -0.007(4)
 C13 0.068(6) 0.036(4) 0.026(4) -0.003(3) 0.004(4) -0.003(4)
 C17 0.120(10) 0.066(7) 0.091(8) -0.043(6) 0.083(8) -0.029(7)
 C29A 0.051(16) 0.08(2) 0.068(19) -0.009(16) 0.025(14) -0.002(14)
 N4B 0.078(19) 0.12(3) 0.09(2) -0.010(19) 0.047(17) -0.028(18)
 C23A 0.072(11) 0.062(11) 0.095(14) 0.047(10) 0.063(11) 0.031(9)
 C24A 0.072(11) 0.062(11) 0.095(14) 0.047(10) 0.063(11) 0.031(9)
 C25A 0.072(11) 0.062(11) 0.095(14) 0.047(10) 0.063(11) 0.031(9)
 C26A 0.029(11) 0.078(19) 0.052(14) 0.018(13) 0.007(10) -0.012(12)
 C27A 0.164(11) 0.062(5) 0.098(7) 0.008(5) 0.071(7) 0.005(6)
 C28A 0.164(11) 0.062(5) 0.098(7) 0.008(5) 0.071(7) 0.005(6)
 C26B 0.164(11) 0.062(5) 0.098(7) 0.008(5) 0.071(7) 0.005(6)
 C27B 0.17(2) 0.051(9) 0.046(9) -0.018(8) 0.039(12) -0.039(12)
 C28B 0.164(11) 0.062(5) 0.098(7) 0.008(5) 0.071(7) 0.005(6)
 C23B 0.164(11) 0.062(5) 0.098(7) 0.008(5) 0.071(7) 0.005(6)
 C24B 0.164(11) 0.062(5) 0.098(7) 0.008(5) 0.071(7) 0.005(6)
 C25B 0.164(11) 0.062(5) 0.098(7) 0.008(5) 0.071(7) 0.005(6)
 C29B 0.086(12) 0.047(9) 0.076(11) 0.001(8) 0.039(10) -0.005(8)
 N4A 0.050(4) 0.049(3) 0.051(4) -0.002(3) 0.026(3) -0.001(3)

_geom_special_details
;
 All esds (except the esd in the dihedral angle between two l.s. planes)
 are estimated using the full covariance matrix.  The cell esds are taken
 into account individually in the estimation of esds in distances, angles
 and torsion angles; correlations between esds in cell parameters are only
 used when they are defined by crystal symmetry.  An approximate (isotropic)
 treatment of cell esds is used for estimating esds involving l.s. planes.
;
loop_
  _geom_bond_atom_site_label_1
  _geom_bond_atom_site_label_2
  _geom_bond_distance
  _geom_bond_site_symmetry_2
  _geom_bond_publ_flag
 I1 Cu1 2.6576(9) . ?
 I1 Cu1 2.6605(10) 5_667 ?
 Cu1 Cu1 2.6346(16) 5_667 ?
 Cu1 N1 2.021(6) . ?
 Cu1 N3 2.029(6) 8_566 ?
 N1 C5 1.332(9) . ?
 N1 C1 1.340(9) . ?
 N3 C20 1.341(9) . ?
 N3 C21 1.338(9) . ?
 N2 C6 1.336(10) . ?
 N2 C7 1.337(10) . ?
 O1 C14 1.380(10) . ?
 O1 C17 1.435(15) . ?
 C10 H10 0.9500 . ?
 C10 C6 1.380(10) . ?
 C10 C9 1.393(10) . ?
 C6 C3 1.499(9) . ?
 C9 C8 1.403(10) . ?
 C9 C11 1.472(10) . ?
 C5 H5 0.9500 . ?
 C5 C4 1.389(10) . ?
 C4 H4 0.9500 . ?
 C4 C3 1.383(10) . ?
 C3 C2 1.375(10) . ?
 C20 H20 0.9500 . ?
 C20 C19 1.378(10) . ?
 C19 H19 0.9500 . ?
 C19 C18 1.388(10) . ?
 C8 H8 0.9500 . ?
 C8 C7 1.386(10) . ?
 C18 C7 1.488(10) . ?
 C18 C22 1.387(10) . ?
 C2 H2 0.9500 . ?
 C2 C1 1.392(10) . ?
 C1 H1 0.9500 . ?
 C22 H22 0.9500 . ?
 C22 C21 1.381(11) . ?
 C11 C16 1.388(11) . ?
 C11 C12 1.401(11) . ?
 C16 H16 0.9500 . ?
 C16 C15 1.392(11) . ?
 C21 H21 0.9500 . ?
 C14 C15 1.371(13) . ?
 C14 C13 1.383(13) . ?
 C12 H12 0.9500 . ?
 C12 C13 1.374(12) . ?
 C15 H15 0.9500 . ?
 C13 H13 0.9500 . ?
 C17 H17A 0.9800 . ?
 C17 H17B 0.9800 . ?
 C17 H17C 0.9800 . ?
 C29A C29A 1.23(6) 2_556 ?
 C29A N4B 1.53(5) 2_556 ?
 C29A N4B 1.45(5) . ?
 C29A C26A 1.51(3) . ?
 N4B C26A 1.76(5) 2_556 ?
 C23A H23A 0.9500 . ?
 C23A C24A 1.3900 . ?
 C23A C28A 1.3900 . ?
 C24A H24A 0.9500 . ?
 C24A C25A 1.3900 . ?
 C25A H25A 0.9500 . ?
 C25A C26A 1.3900 . ?
 C26A C27A 1.3900 . ?
 C27A H27A 0.9500 . ?
 C27A C28A 1.3900 . ?
 C28A H28A 0.9500 . ?
 C26B C27B 1.3900 . ?
 C26B C25B 1.3900 . ?
 C26B C29B 1.422(19) . ?
 C27B H27B 0.9500 . ?
 C27B C28B 1.3900 . ?
 C28B C23B 1.3900 . ?
 C23B H23B 0.9500 . ?
 C23B C24B 1.3900 . ?
 C24B H24B 0.9500 . ?
 C24B C25B 1.3900 . ?
 C25B H25B 0.9500 . ?
 C29B H29A 0.9900 . ?
 C29B H29B 0.9900 . ?
 C29B N4A 1.365(14) . ?

loop_
  _geom_angle_atom_site_label_1
  _geom_angle_atom_site_label_2
  _geom_angle_atom_site_label_3
  _geom_angle
  _geom_angle_site_symmetry_1
  _geom_angle_site_symmetry_3
  _geom_angle_publ_flag
 Cu1 I1 Cu1 59.39(3) . 5_667 ?
 I1 Cu1 I1 120.61(3) . 5_667 ?
 Cu1 Cu1 I1 60.25(3) 5_667 5_667 ?
 Cu1 Cu1 I1 60.36(3) 5_667 . ?
 N1 Cu1 I1 106.81(17) . 5_667 ?
 N1 Cu1 I1 107.45(17) . . ?
 N1 Cu1 Cu1 126.48(17) . 5_667 ?
 N1 Cu1 N3 115.5(2) . 8_566 ?
 N3 Cu1 I1 101.97(17) 8_566 . ?
 N3 Cu1 I1 104.95(17) 8_566 5_667 ?
 N3 Cu1 Cu1 118.03(17) 8_566 5_667 ?
 C5 N1 Cu1 119.0(5) . . ?
 C5 N1 C1 116.8(6) . . ?
 C1 N1 Cu1 124.2(5) . . ?
 C20 N3 Cu1 120.9(5) . 8_465 ?
 C21 N3 Cu1 122.1(5) . 8_465 ?
 C21 N3 C20 116.2(6) . . ?
 C6 N2 C7 117.7(7) . . ?
 C14 O1 C17 115.8(8) . . ?
 C6 C10 H10 120.0 . . ?
 C6 C10 C9 120.0(6) . . ?
 C9 C10 H10 120.0 . . ?
 N2 C6 C10 123.3(7) . . ?
 N2 C6 C3 116.2(6) . . ?
 C10 C6 C3 120.4(6) . . ?
 C10 C9 C8 116.2(6) . . ?
 C10 C9 C11 122.4(6) . . ?
 C8 C9 C11 121.4(6) . . ?
 N1 C5 H5 118.2 . . ?
 N1 C5 C4 123.5(7) . . ?
 C4 C5 H5 118.2 . . ?
 C5 C4 H4 120.3 . . ?
 C3 C4 C5 119.4(7) . . ?
 C3 C4 H4 120.3 . . ?
 C4 C3 C6 121.3(6) . . ?
 C2 C3 C6 121.2(6) . . ?
 C2 C3 C4 117.4(6) . . ?
 N3 C20 H20 118.3 . . ?
 N3 C20 C19 123.5(7) . . ?
 C19 C20 H20 118.3 . . ?
 C20 C19 H19 119.9 . . ?
 C20 C19 C18 120.3(6) . . ?
 C18 C19 H19 119.9 . . ?
 C9 C8 H8 119.9 . . ?
 C7 C8 C9 120.2(6) . . ?
 C7 C8 H8 119.9 . . ?
 C19 C18 C7 120.8(6) . . ?
 C22 C18 C19 116.3(6) . . ?
 C22 C18 C7 123.0(6) . . ?
 C3 C2 H2 120.1 . . ?
 C3 C2 C1 119.8(6) . . ?
 C1 C2 H2 120.1 . . ?
 N2 C7 C8 122.6(7) . . ?
 N2 C7 C18 116.2(6) . . ?
 C8 C7 C18 121.2(6) . . ?
 N1 C1 C2 123.0(7) . . ?
 N1 C1 H1 118.5 . . ?
 C2 C1 H1 118.5 . . ?
 C18 C22 H22 120.0 . . ?
 C21 C22 C18 120.0(7) . . ?
 C21 C22 H22 120.0 . . ?
 C16 C11 C9 120.6(7) . . ?
 C16 C11 C12 117.1(7) . . ?
 C12 C11 C9 122.3(7) . . ?
 C11 C16 H16 119.0 . . ?
 C11 C16 C15 121.9(8) . . ?
 C15 C16 H16 119.0 . . ?
 N3 C21 C22 123.6(7) . . ?
 N3 C21 H21 118.2 . . ?
 C22 C21 H21 118.2 . . ?
 O1 C14 C13 114.8(8) . . ?
 C15 C14 O1 124.9(9) . . ?
 C15 C14 C13 120.3(7) . . ?
 C11 C12 H12 119.3 . . ?
 C13 C12 C11 121.3(8) . . ?
 C13 C12 H12 119.3 . . ?
 C16 C15 H15 120.4 . . ?
 C14 C15 C16 119.3(8) . . ?
 C14 C15 H15 120.4 . . ?
 C14 C13 H13 120.0 . . ?
 C12 C13 C14 120.1(8) . . ?
 C12 C13 H13 120.0 . . ?
 O1 C17 H17A 109.5 . . ?
 O1 C17 H17B 109.5 . . ?
 O1 C17 H17C 109.5 . . ?
 H17A C17 H17B 109.5 . . ?
 H17A C17 H17C 109.5 . . ?
 H17B C17 H17C 109.5 . . ?
 C29A C29A N4B 62(3) 2_556 2_556 ?
 C29A C29A N4B 69(3) 2_556 . ?
 C29A C29A C26A 129(3) 2_556 . ?
 N4B C29A N4B 109(3) . 2_556 ?
 N4B C29A C26A 112(3) . . ?
 C26A C29A N4B 70.4(19) . 2_556 ?
 C29A N4B C29A 49(3) . 2_556 ?
 C29A N4B C26A 101(3) . 2_556 ?
 C29A N4B C26A 54(2) 2_556 2_556 ?
 C24A C23A H23A 120.0 . . ?
 C24A C23A C28A 120.0 . . ?
 C28A C23A H23A 120.0 . . ?
 C23A C24A H24A 120.0 . . ?
 C25A C24A C23A 120.0 . . ?
 C25A C24A H24A 120.0 . . ?
 C24A C25A H25A 120.0 . . ?
 C24A C25A C26A 120.0 . . ?
 C26A C25A H25A 120.0 . . ?
 C29A C26A N4B 55.4(17) . 2_556 ?
 C25A C26A C29A 114.7(17) . . ?
 C25A C26A N4B 121.8(16) . 2_556 ?
 C27A C26A C29A 124.9(18) . . ?
 C27A C26A N4B 98.7(17) . 2_556 ?
 C27A C26A C25A 120.0 . . ?
 C26A C27A H27A 120.0 . . ?
 C26A C27A C28A 120.0 . . ?
 C28A C27A H27A 120.0 . . ?
 C23A C28A H28A 120.0 . . ?
 C27A C28A C23A 120.0 . . ?
 C27A C28A H28A 120.0 . . ?
 C27B C26B C25B 120.0 . . ?
 C27B C26B C29B 130.2(11) . . ?
 C25B C26B C29B 109.8(11) . . ?
 C26B C27B H27B 120.0 . . ?
 C26B C27B C28B 120.0 . . ?
 C28B C27B H27B 120.0 . . ?
 C23B C28B C27B 120.0 . . ?
 C28B C23B H23B 120.0 . . ?
 C24B C23B C28B 120.0 . . ?
 C24B C23B H23B 120.0 . . ?
 C23B C24B H24B 120.0 . . ?
 C23B C24B C25B 120.0 . . ?
 C25B C24B H24B 120.0 . . ?
 C26B C25B H25B 120.0 . . ?
 C24B C25B C26B 120.0 . . ?
 C24B C25B H25B 120.0 . . ?
 C26B C29B H29A 107.0 . . ?
 C26B C29B H29B 107.0 . . ?
 H29A C29B H29B 106.7 . . ?
 N4A C29B C26B 121.3(15) . . ?
 N4A C29B H29A 107.0 . . ?
 N4A C29B H29B 107.0 . . ?

_shelx_res_file
;
TITL 1x.res in C2/c
    1x.res
    created by SHELXL-2016/6 at 16:09:27 on 12-Mar-2019
CELL 0.71073 24.2935 12.633 17.7632 90 113.007 90
ZERR 8 0.0009 0.0005 0.0006 0 0.001 0
LATT 7
SYMM -X,+Y,0.5-Z
SFAC C H Cu I N O
UNIT 232 181.13 8 8 32 8
DFIX 1.3 N4A C29B
EADP C23A C25A
EADP C25B C24B
EADP C23B C25B
EADP C26B C28B C24B
EADP C25A C24A
EADP C27A C25B
EADP C28A C27A
EADP N4A N2

L.S. 20
PLAN  10
SIZE 0.35 0.25 0.25
TEMP -159.41
HTAB
BOND $H
fmap 2
acta
REM <olex2.extras>
REM <HklSrc "%.\\1x.hkl">
REM </olex2.extras>

WGHT    0.103800   83.008606
EXTI    0.000669
FVAR       0.19899
I1    4    0.458280    0.643393    1.038948    11.00000    0.04811    0.03359 =
         0.03951    0.00812    0.02767    0.01052
CU1   3    0.497986    0.552424    0.934870    11.00000    0.02902    0.03262 =
         0.02732    0.00251    0.01194   -0.00204
N1    5    0.429969    0.552447    0.823610    11.00000    0.02584    0.03517 =
         0.02874   -0.00240    0.00944   -0.00242
N3    5    0.068666    0.854313    0.445598    11.00000    0.02558    0.03731 =
         0.02879   -0.00226    0.01212   -0.00004
N2    5    0.247825    0.616184    0.564803    11.00000    0.04969    0.04908 =
         0.05104   -0.00219    0.02557   -0.00121
O1    6    0.211177    0.119705    0.229778    11.00000    0.11574    0.04095 =
         0.03979   -0.01600    0.04129   -0.01828
C10   1    0.282955    0.451061    0.535039    11.00000    0.03704    0.02902 =
         0.02687    0.00261    0.01495    0.00167
AFIX  43
H10   2    0.311755    0.395893    0.552968    11.00000   -1.20000
AFIX   0
C6    1    0.287620    0.537364    0.584763    11.00000    0.02820    0.02735 =
         0.02562    0.00332    0.01200    0.00176
C9    1    0.236041    0.444765    0.458560    11.00000    0.03426    0.02925 =
         0.02903    0.00256    0.01914   -0.00147
C5    1    0.432117    0.486396    0.766378    11.00000    0.03022    0.04291 =
         0.03467   -0.00465    0.01657    0.00732
AFIX  43
H5    2    0.465645    0.440618    0.779949    11.00000   -1.20000
AFIX   0
C4    1    0.387952    0.480854    0.687888    11.00000    0.03506    0.04831 =
         0.02818   -0.00544    0.01688    0.00479
AFIX  43
H4    2    0.391991    0.433390    0.648877    11.00000   -1.20000
AFIX   0
C3    1    0.338078    0.545015    0.667057    11.00000    0.03015    0.02875 =
         0.03034    0.00004    0.01836   -0.00225
C20   1    0.116699    0.848598    0.516267    11.00000    0.02967    0.04554 =
         0.02961   -0.01149    0.00866   -0.00026
AFIX  43
H20   2    0.120591    0.899331    0.557519    11.00000   -1.20000
AFIX   0
C19   1    0.160714    0.773017    0.532212    11.00000    0.02642    0.04340 =
         0.02593   -0.00633    0.00542    0.00400
AFIX  43
H19   2    0.193673    0.772412    0.583574    11.00000   -1.20000
AFIX   0
C8    1    0.195206    0.529125    0.437398    11.00000    0.02841    0.02850 =
         0.02655   -0.00016    0.01015    0.00031
AFIX  43
H8    2    0.162717    0.529781    0.385574    11.00000   -1.20000
AFIX   0
C18   1    0.157085    0.697777    0.473539    11.00000    0.02550    0.03294 =
         0.03165   -0.00017    0.01385    0.00040
C2    1    0.335746    0.614177    0.725501    11.00000    0.02850    0.02818 =
         0.03181   -0.00051    0.00788    0.00479
AFIX  43
H2    2    0.302535    0.660396    0.713398    11.00000   -1.20000
AFIX   0
C7    1    0.202161    0.611488    0.491923    11.00000    0.02592    0.03366 =
         0.02556    0.00224    0.01264   -0.00024
C1    1    0.382214    0.616249    0.802468    11.00000    0.03788    0.03136 =
         0.03201   -0.00628    0.01442   -0.00064
AFIX  43
H1    2    0.379971    0.665132    0.841812    11.00000   -1.20000
AFIX   0
C22   1    0.108989    0.706976    0.398989    11.00000    0.04113    0.04559 =
         0.02444   -0.01215    0.00774    0.00431
AFIX  43
H22   2    0.105285    0.659871    0.355581    11.00000   -1.20000
AFIX   0
C11   1    0.229642    0.355898    0.402114    11.00000    0.04229    0.03093 =
         0.02555    0.00162    0.01874   -0.00834
C16   1    0.279252    0.297932    0.406160    11.00000    0.04368    0.03173 =
         0.04565   -0.00544    0.02659   -0.00636
AFIX  43
H16   2    0.317079    0.313609    0.448024    11.00000   -1.20000
AFIX   0
C21   1    0.066480    0.784565    0.387818    11.00000    0.04163    0.04425 =
         0.02766   -0.01182    0.00810    0.00946
AFIX  43
H21   2    0.033866    0.788652    0.336235    11.00000   -1.20000
AFIX   0
C14   1    0.220863    0.195314    0.289656    11.00000    0.08654    0.02814 =
         0.03568   -0.00323    0.03803   -0.00628
C12   1    0.174640    0.329161    0.340085    11.00000    0.05145    0.03781 =
         0.03441    0.00071    0.00949    0.00447
AFIX  43
H12   2    0.139574    0.365941    0.336423    11.00000   -1.20000
AFIX   0
C15   1    0.275217    0.217500    0.350682    11.00000    0.05725    0.03774 =
         0.04730   -0.00526    0.03711   -0.00741
AFIX  43
H15   2    0.309752    0.178425    0.355072    11.00000   -1.20000
AFIX   0
C13   1    0.170399    0.250799    0.284433    11.00000    0.06775    0.03611 =
         0.02580   -0.00328    0.00367   -0.00315
AFIX  43
H13   2    0.132760    0.234702    0.242310    11.00000   -1.20000
AFIX   0
C17   1    0.261734    0.055022    0.237885    11.00000    0.11958    0.06600 =
         0.09091   -0.04329    0.08309   -0.02914
AFIX 137
H17A  2    0.248969   -0.002222    0.197475    11.00000   -1.50000
H17B  2    0.278782    0.024747    0.293037    11.00000   -1.50000
H17C  2    0.291983    0.098362    0.228682    11.00000   -1.50000
AFIX   0

PART 1
C29A  1    0.021403    0.632215    0.739635    10.35839    0.05101    0.07848 =
         0.06847   -0.00855    0.02499   -0.00199
N4B   5    0.037463    0.583354    0.819482    10.35839    0.07830    0.11540 =
         0.08786   -0.01025    0.04736   -0.02820
AFIX  66
C23A  1    0.072705    0.440572    0.579157    10.35839    0.07171    0.06223 =
         0.09530    0.04706    0.06255    0.03073
AFIX  43
H23A  2    0.085999    0.400006    0.544456    10.35839   -1.20000
AFIX  65
C24A  1    0.072967    0.550473    0.575544    10.35839    0.07171    0.06223 =
         0.09530    0.04706    0.06255    0.03073
AFIX  43
H24A  2    0.086440    0.585020    0.538373    10.35839   -1.20000
AFIX  65
C25A  1    0.053517    0.609828    0.626318    10.35839    0.07171    0.06223 =
         0.09530    0.04706    0.06255    0.03073
AFIX  43
H25A  2    0.053696    0.684941    0.623848    10.35839   -1.20000
AFIX  65
C26A  1    0.033803    0.559282    0.680705    10.35839    0.02865    0.07768 =
         0.05241    0.01773    0.00714   -0.01238
C27A  1    0.033541    0.449381    0.684319    10.35839    0.16408    0.06248 =
         0.09832    0.00827    0.07115    0.00510
AFIX  43
H27A  2    0.020068    0.414836    0.721490    10.35839   -1.20000
AFIX  65
C28A  1    0.052991    0.390025    0.633546    10.35839    0.16408    0.06248 =
         0.09832    0.00827    0.07115    0.00510
AFIX  43
H28A  2    0.052812    0.314912    0.636016    10.35839   -1.20000
AFIX  66
PART 0
PART 2
C26B  1    0.081139    0.476087    0.590602    10.64161    0.16408    0.06248 =
         0.09832    0.00827    0.07115    0.00510
C27B  1    0.090262    0.574758    0.628145    10.64161    0.16656    0.05070 =
         0.04649   -0.01806    0.03938   -0.03899
AFIX  43
H27B  2    0.101128    0.633485    0.603479    10.64161   -1.20000
AFIX  65
C28B  1    0.083484    0.587502    0.701777    10.64161    0.16408    0.06248 =
         0.09832    0.00827    0.07115    0.00510
C23B  1    0.067585    0.501575    0.737867    10.64161    0.16408    0.06248 =
         0.09832    0.00827    0.07115    0.00510
AFIX  43
H23B  2    0.062953    0.510285    0.788192    10.64161   -1.20000
AFIX  65
C24B  1    0.058462    0.402904    0.700326    10.64161    0.16408    0.06248 =
         0.09832    0.00827    0.07115    0.00510
AFIX  43
H24B  2    0.047595    0.344177    0.724992    10.64161   -1.20000
AFIX  65
C25B  1    0.065239    0.390159    0.626693    10.64161    0.16408    0.06248 =
         0.09832    0.00827    0.07115    0.00510
AFIX  43
H25B  2    0.059004    0.322721    0.601035    10.64161   -1.20000
AFIX   0
C29B  1    0.084364    0.444419    0.515618    10.64161    0.08589    0.04706 =
         0.07573    0.00077    0.03897   -0.00499
AFIX  23
H29A  2    0.077133    0.508421    0.480907    10.64161   -1.20000
H29B  2    0.126163    0.422408    0.528342    10.64161   -1.20000
AFIX   0
N4A   5    0.048319    0.366465    0.468521    10.64161    0.04969    0.04908 =
         0.05104   -0.00219    0.02557   -0.00121
HKLF 4


REM  1x.res in C2/c
REM R1 =  0.0662 for    3920 Fo > 4sig(Fo)  and  0.0779 for all    4606 data
REM    321 parameters refined using      1 restraints

END

WGHT      0.1038     83.0191

REM Instructions for potential hydrogen bonds
EQIV $1 -x+1, -y+1, -z+2
HTAB C5 I1_$1
EQIV $5 x, -y+1, z-1/2
HTAB C4 I1_$5
HTAB C1 I1
EQIV $2 x-1/2, -y+3/2, z-1/2
HTAB C25A I1_$2

REM Highest difference peak  2.098,  deepest hole -4.974,  1-sigma level  0.190
Q1    1   0.0000  0.7417  0.7500  10.50000  0.05    1.02
Q2    1   0.0000  0.5411  0.7500  10.50000  0.05    0.86
Q3    1   0.0031  0.2315  0.5658  11.00000  0.05    0.84
Q4    1   0.4180  0.4468  0.6425  11.00000  0.05    0.78
Q5    1   0.0188  0.5251  0.7782  11.00000  0.05    0.75
Q6    1   0.4517  0.6529  0.9869  11.00000  0.05    0.73
Q7    1  -0.0041  0.3354  0.4344  11.00000  0.05    0.68
Q8    1   0.4289  0.5982  1.0486  11.00000  0.05    0.64
Q9    1   0.0437  0.5739  0.4625  11.00000  0.05    0.64
Q10   1   0.0049  0.5371  0.8092  11.00000  0.05    0.64
;
_shelx_res_checksum                91722
_shelx_hkl_file
;
   4   0   0 7463.45  544.45
  -4   0   0 6688.23  545.35
   6   0   0  117.19   11.30
  -6   0   0  136.49   13.60
  -6   0   0  132.39   13.70
  -6   0   0  153.58   11.30
   6   0   0  159.28   13.50
   8   0   0  557.84   50.39
  -8   0   0  650.93   52.59
  -8   0   0  728.03   52.69
   8   0   0  663.23   52.69
  -8   0   0  652.73   50.29
 -10   0   0  490.05   41.50
  10   0   0  428.46   38.50
 -10   0   0  521.85   41.40
  10   0   0  498.65   41.60
 -10   0   0  521.15   39.00
 -12   0   0  204.48   17.30
 -12   0   0  232.28   21.20
 -12   0   0  212.18   21.30
  12   0   0  212.38   21.70
 -14   0   0    4.40    4.70
  14   0   0    1.60    6.20
 -14   0   0    5.80    5.00
 -14   0   0    4.30    2.00
  16   0   0   12.00    7.90
 -16   0   0   17.90    7.30
 -16   0   0   22.30    3.40
 -18   0   0 1582.44  120.69
  18   0   0 1377.16  121.29
 -20   0   0  475.05   42.30
  20   0   0  402.66   43.20
 -22   0   0  154.48   21.20
  22   0   0   87.09   19.10
  24   0   0  715.43   71.69
 -24   0   0  820.02   68.49
  26   0   0  612.44   60.69
  -3  -1   0 2364.96  167.98
   3  -1   0 1943.91  167.98
   3  -1   0 2137.49  167.08
  -3  -1   0 2270.27  166.88
   3   1   0 2203.78  166.88
  -3   1   0 2121.79  167.08
  -3   1   0 2111.69  167.98
   5  -1   0 1458.75  116.69
   5  -1   0 1492.05  117.29
  -5  -1   0 1631.34  117.89
  -5  -1   0 1472.95  116.29
   5   1   0 1469.15  117.79
  -5   1   0 1551.74  117.29
   5   1   0 1443.86  116.29
  -5   1   0 1527.75  118.09
  -7  -1   0 1126.19   80.99
   7  -1   0 1027.70   80.29
   7  -1   0  985.50   79.39
   7   1   0  953.60   78.69
  -7   1   0  866.81   78.49
   7   1   0 1083.19   81.09
  -7   1   0 1078.39   80.29
  -7   1   0 1026.70   81.09
   9  -1   0  195.78   17.60
   9  -1   0  173.28   15.90
  -9  -1   0  161.18   16.90
  -9  -1   0  209.78   18.10
  -9  -1   0  184.18   14.90
   9   1   0  189.08   18.20
  -9   1   0  199.68   17.30
  -9   1   0  174.88   20.00
   9   1   0  170.18   14.90
  -9   1   0  175.28   14.70
 -11  -1   0   28.50    3.80
 -11  -1   0   13.80    5.00
  11  -1   0   12.60    5.40
  11  -1   0   18.80    4.50
 -11  -1   0   17.40    5.60
 -11   1   0   16.40    5.80
  11   1   0   11.70    2.60
 -11   1   0   16.10    2.50
 -11   1   0   14.70    5.10
  11   1   0   19.00    6.60
  13  -1   0   11.70    6.10
  13  -1   0   11.80    4.20
 -13  -1   0    3.90    4.90
 -13  -1   0   10.10    5.70
 -13  -1   0    9.40    2.60
  13   1   0    8.80    6.40
  13   1   0   12.50    2.80
 -13   1   0    9.90    4.80
 -13   1   0   12.30    6.00
  15  -1   0  151.38   19.60
 -15  -1   0  175.88   14.60
  15  -1   0  144.99   16.30
 -15  -1   0  176.18   19.00
 -15  -1   0  161.38   19.20
 -15   1   0  181.38   18.90
  15   1   0  140.69   15.10
 -15   1   0  198.98   20.90
  15   1   0  172.38   20.90
  17  -1   0  385.66   37.30
 -17  -1   0  402.76   36.10
 -17  -1   0  388.46   31.70
  17   1   0  339.67   37.70
 -17   1   0  411.96   37.80
  19  -1   0 1037.00   88.79
 -19  -1   0 1129.69   86.99
 -19  -1   0 1000.80   82.59
 -19   1   0 1149.08   88.99
  19   1   0  935.71   89.09
 -21  -1   0   19.80    8.70
  21  -1   0   17.30   10.50
  21   1   0   30.30   11.20
 -21   1   0   34.40   11.50
 -23  -1   0  587.24   51.59
  23  -1   0  551.24   55.89
  23   1   0  557.44   56.69
 -23   1   0  609.34   54.59
  25  -1   0  217.38   32.10
 -25  -1   0  202.88   25.40
 -25   1   0  234.08   29.50
  25   1   0  219.38   32.30
   0  -2   0 2671.03  195.38
   0  -2   0 2380.46  194.08
   0   2   0 2779.82  195.28
   0   2   0 2359.16  194.18
   0   2   0 2400.06  194.28
  -2  -2   0 1334.87  109.19
  -2  -2   0 1356.56  108.09
   2  -2   0 1335.77  107.89
  -2  -2   0 1572.34  108.59
   2  -2   0 1409.16  109.59
   2   2   0 1236.68  109.19
   2   2   0 1456.25  108.49
  -2   2   0 1505.15  109.49
  -2   2   0 1277.97  107.89
   2   2   0 1455.15  108.09
  -4  -2   0 1285.57  100.89
   4  -2   0 1230.08  102.89
  -4  -2   0 1461.55  102.79
  -4  -2   0 1238.18  100.89
   4  -2   0 1290.17  100.89
  -4   2   0 1326.77  102.69
   4   2   0 1282.07  102.59
   4   2   0 1368.86  100.89
  -4   2   0 1227.58  100.89
   6  -2   0   12.20    2.90
   6  -2   0   14.40    3.70
  -6  -2   0   22.20    6.10
  -6  -2   0   21.90    3.00
   6  -2   0   10.90    4.50
  -6  -2   0   12.80    2.60
  -6   2   0   18.10    3.30
   6   2   0   16.20    5.60
   6   2   0   19.40    2.80
   8  -2   0  551.64   43.50
   8  -2   0  516.75   42.50
  -8  -2   0  541.55   42.00
   8   2   0  518.05   41.80
   8   2   0  505.25   44.60
  -8   2   0  545.95   44.90
 -10  -2   0 1582.74  117.29
  10  -2   0 1537.25  119.29
  10  -2   0 1417.16  117.89
  10   2   0 1415.86  118.39
  10   2   0 1483.65  120.49
 -10   2   0 1603.44  120.89
 -12  -2   0  749.13   67.89
  12  -2   0  817.22   67.49
 -12  -2   0  869.01   66.49
 -12  -2   0  917.21   70.39
  12  -2   0  874.81   69.29
 -12   2   0  944.31   70.99
  12   2   0  856.31   70.59
  12   2   0  808.22   66.39
 -12   2   0  807.82   66.29
 -14  -2   0 1092.49   83.09
 -14  -2   0 1010.00   84.89
 -14  -2   0 1217.08   87.89
  14  -2   0 1062.09   87.09
  14  -2   0  982.00   84.29
 -14   2   0 1101.19   87.79
  14   2   0 1101.59   88.89
  14   2   0  952.40   82.99
  16  -2   0  708.73   60.39
 -16  -2   0  733.63   56.19
  16   2   0  707.13   62.09
  16   2   0  631.54   55.99
 -16   2   0  754.32   61.79
  18  -2   0   43.30   10.80
 -18  -2   0   47.70    7.30
 -18  -2   0   61.39   10.10
  18   2   0   47.90    7.00
  18   2   0   77.29   17.00
 -18   2   0   37.80   11.60
 -20  -2   0  129.79   14.20
  20  -2   0  143.99   21.50
 -20  -2   0  146.79   18.30
  20   2   0  133.99   14.00
 -20   2   0  148.09   22.70
  20   2   0  145.39   24.00
 -22  -2   0    0.90    7.10
  22  -2   0   16.30   11.90
 -22   2   0   16.00   10.60
  22   2   0   -1.00   11.80
  24  -2   0   26.00   13.40
  24   2   0   17.90   13.60
  26  -2   0   -0.30   13.30
  26   2   0   19.40   15.80
   1  -3   0 1639.04  133.69
   1  -3   0 1787.82  135.79
  -1  -3   0 1922.11  135.39
  -1  -3   0 1786.52  133.79
  -1  -3   0 1486.45  135.09
  -1  -3   0 1567.54  133.99
   1  -3   0 1532.65  133.89
   1   3   0 1992.40  135.29
   1   3   0 1484.75  135.19
  -1   3   0 1745.73  133.99
  -1   3   0 1700.53  133.79
   1   3   0 1698.13  133.79
  -1   3   0 1979.20  135.79
   1   3   0 1849.71  134.09
  -3  -3   0  722.83   51.69
  -3  -3   0  613.84   50.29
   3  -3   0  610.84   49.90
  -3  -3   0  603.44   52.09
   3  -3   0  627.74   52.59
  -3   3   0  609.04   49.99
   3   3   0  673.03   50.79
   3   3   0  720.73   50.39
   3   3   0  548.65   52.09
  -3   3   0  608.74   49.99
   5  -3   0   41.50    8.10
  -5  -3   0   47.10    8.00
   5  -3   0   45.30    5.40
  -5  -3   0   54.99    5.90
  -5  -3   0   55.09    6.00
  -5   3   0   43.40    5.40
  -5   3   0   53.99    8.50
   5   3   0   56.79    6.20
   5   3   0   41.30    7.40
   5   3   0   37.30    5.50
  -7  -3   0 1491.25  120.39
  -7  -3   0 1556.54  120.49
   7  -3   0 1478.05  120.59
   7  -3   0 1438.86  123.79
  -7  -3   0 1757.62  123.49
  -7   3   0 1502.95  120.69
   7   3   0 1619.64  120.39
   7   3   0 1402.46  122.99
  -7   3   0 1696.13  123.69
  -9  -3   0 2369.76  159.08
   9  -3   0 2050.79  156.68
   9  -3   0 2004.60  155.78
   9  -3   0 1734.93  158.98
  -9  -3   0 1843.92  155.08
  -9  -3   0 2091.29  155.38
   9   3   0 2019.30  155.18
   9   3   0 1882.01  158.38
  -9   3   0 2021.20  155.88
  11  -3   0 3130.49  249.68
 -11  -3   0 3195.88  249.08
 -11  -3   0 3641.14  253.07
  11  -3   0 3224.18  250.97
  11   3   0 2927.31  252.47
  11   3   0 2943.01  248.78
 -11   3   0 3483.45  253.27
 -13  -3   0 2784.52  193.48
  13  -3   0 2622.24  195.88
  13  -3   0 2500.75  194.38
 -13  -3   0 2198.28  193.88
  13   3   0 2352.76  201.08
  13   3   0 2468.75  193.08
  15  -3   0  836.52   69.59
 -15  -3   0  887.81   68.49
  15  -3   0  902.51   71.79
 -15  -3   0  856.61   69.59
  15   3   0  815.92   68.09
  15   3   0  828.82   73.79
 -15   3   0  933.11   73.99
 -15   3   0  830.22   67.39
  17  -3   0  330.67   31.80
 -17  -3   0  310.57   27.50
  17   3   0  290.77   34.10
 -17   3   0  344.17   34.70
  17   3   0  310.97   27.10
  19  -3   0  100.89   18.00
 -19  -3   0   79.99   11.40
  19   3   0   82.79   10.70
 -19   3   0   75.59   14.90
  19   3   0  104.79   19.80
 -21  -3   0   27.40    6.70
  21  -3   0   30.30   12.40
  21   3   0   34.60    6.10
  21   3   0   26.60   14.40
  23  -3   0   65.29   16.70
  23   3   0   40.70    7.30
  23   3   0   31.90   15.20
  25  -3   0   86.49   19.70
  25   3   0   57.39   18.90
   0  -4   0 3083.89  269.77
   0  -4   0 3491.65  271.77
   0  -4   0 3504.15  269.57
   0   4   0 3436.96  269.57
   0   4   0 3397.16  269.77
   0   4   0 4025.50  272.07
  -2  -4   0 1665.23  126.49
   2  -4   0 1694.13  127.89
  -2  -4   0 1468.25  126.89
  -2  -4   0 1451.55  125.09
   2   4   0 1517.35  124.79
   2   4   0 1463.75  127.09
  -2   4   0 1559.14  124.99
   2   4   0 1671.23  125.19
   2   4   0 1827.92  126.59
  -2   4   0 1536.75  124.79
  -2   4   0 1804.72  127.49
  -4  -4   0  712.23   56.59
   4  -4   0  629.64   53.49
  -4  -4   0  708.83   54.79
   4  -4   0  670.33   57.29
  -4  -4   0  644.14   53.99
  -4   4   0  654.93   53.69
   4   4   0  688.83   54.69
   4   4   0  650.53   56.59
   4   4   0  677.83   53.79
   4   4   0  732.63   54.09
  -4   4   0  677.03   53.79
  -4   4   0  702.13   56.49
  -6  -4   0  372.46   31.30
  -6  -4   0  382.96   34.20
  -6  -4   0  432.46   31.80
   6  -4   0  365.06   31.00
   6  -4   0  360.86   35.30
  -6   4   0  370.16   31.10
   6   4   0  312.97   31.20
   6   4   0  327.87   34.10
  -6   4   0  452.05   34.80
   6   4   0  439.46   31.40
  -6   4   0  371.76   30.80
   8  -4   0  686.03   56.49
  -8  -4   0  734.03   59.99
   8  -4   0  657.83   61.09
  -8  -4   0  688.93   56.59
  -8  -4   0  774.92   56.49
   8   4   0  791.22   56.49
   8   4   0  578.84   59.59
  -8   4   0  652.13   56.49
  -8   4   0  780.42   60.39
 -10  -4   0 2362.86  168.48
  10  -4   0 2199.38  168.78
 -10  -4   0 2094.59  167.38
  10  -4   0 2085.29  167.68
  10  -4   0 1835.42  171.68
 -10   4   0 2183.58  167.88
  10   4   0 2233.28  167.28
  10   4   0 1980.30  171.08
 -10   4   0 2355.36  171.68
  12  -4   0 2723.43  196.78
 -12  -4   0 2745.43  195.98
 -12  -4   0 2373.66  191.38
  12  -4   0 2346.47  192.98
  12   4   0 2182.68  195.68
 -12   4   0 2621.44  196.08
  12   4   0 2285.27  190.98
 -14  -4   0 1455.65  109.09
  14  -4   0 1449.15  111.49
  14  -4   0 1401.26  109.79
  14   4   0 1348.57  108.59
  14   4   0 1256.07  113.69
 -16  -4   0   69.39    9.50
  16  -4   0   67.89   11.90
  16  -4   0   54.29   14.70
 -16   4   0   65.69   13.20
 -16   4   0   73.59    8.00
  16   4   0   73.29   17.50
  16   4   0   69.69    9.20
  18  -4   0   33.70   10.20
 -18  -4   0   25.10    6.80
 -18   4   0   25.10   12.70
  18   4   0   29.20   12.30
  18   4   0   32.80    6.00
  20  -4   0   43.90   13.10
 -20  -4   0   63.79    9.20
  20   4   0   58.59    8.50
  20   4   0   51.79   16.70
  22  -4   0   73.89   14.80
  22   4   0   69.89   19.80
  22   4   0   72.69    9.80
  24  -4   0  116.89   20.80
  24   4   0  124.89   14.70
  24   4   0  124.79   26.20
  26   4   0   -1.60   13.30
  -1  -5   0    7.40    2.60
  -1  -5   0    5.90    4.50
  -1  -5   0    5.00    2.90
   1  -5   0    9.40    4.90
   1  -5   0    6.20    2.30
  -1  -5   0    3.00    4.60
   1   5   0    9.80    3.90
   1   5   0    6.10    2.50
  -1   5   0    8.00    4.10
   1   5   0    6.00    2.70
  -1   5   0    2.60    2.40
  -1   5   0    7.10    2.70
  -3  -5   0   39.30    6.20
  -3  -5   0   39.80    7.10
   3  -5   0   25.40    7.00
   3  -5   0   39.40    5.20
  -3  -5   0   40.00    8.90
  -3   5   0   47.50    5.80
  -3   5   0   54.79    6.40
   3   5   0   28.50    8.50
   3   5   0   42.10    5.50
  -3   5   0   33.80    7.30
   3   5   0   44.40    6.30
   3   5   0   52.99    7.70
  -5  -5   0   17.80    5.30
  -5  -5   0   17.00    4.40
   5  -5   0   24.90    4.20
   5  -5   0   22.20    7.90
  -5  -5   0   13.60    6.70
  -5   5   0   21.80    4.30
   5   5   0   20.70    4.50
  -5   5   0   22.50    6.60
  -5   5   0   28.10    5.20
   5   5   0   18.40    8.00
   5   5   0   26.60    4.70
  -7  -5   0  380.96   34.20
   7  -5   0  344.77   29.80
  -7  -5   0  342.17   30.40
   7  -5   0  339.47   35.60
  -7  -5   0  417.46   31.00
  -7   5   0  361.66   30.20
   7   5   0  325.27   34.30
  -7   5   0  355.26   29.70
   7   5   0  301.77   30.30
   7   5   0  401.56   30.40
  -7   5   0  392.36   34.10
   9  -5   0   35.10   10.30
  -9  -5   0   30.60    8.60
   9  -5   0   29.10    5.30
  -9  -5   0   40.40    6.60
  -9   5   0   39.70    8.50
   9   5   0   39.50    5.90
   9   5   0   24.70    8.20
  -9   5   0   52.29    6.30
  -9   5   0   30.00    6.20
  11  -5   0   -4.60    6.60
  11  -5   0   -0.10    4.20
 -11  -5   0   -5.20    5.80
 -11  -5   0    5.00    3.20
  11  -5   0    5.80    4.10
 -11  -5   0    0.30    3.80
 -11   5   0    5.50    4.10
  11   5   0   -1.30    8.00
  11   5   0    7.50    3.20
 -11   5   0    8.40    3.10
 -11   5   0    7.30    7.50
 -13  -5   0   97.59   11.70
  13  -5   0   61.09   18.00
 -13  -5   0  104.79   17.10
  13  -5   0   71.49   13.60
 -13   5   0  118.49   17.00
  13   5   0   87.19   10.30
 -13   5   0   92.79    9.90
  13   5   0   58.49   15.40
 -13   5   0   81.79   11.70
  15  -5   0   49.70   10.80
 -15  -5   0   49.30    8.30
  15  -5   0   23.90   11.20
  15   5   0   36.20   13.30
 -15   5   0   66.09    7.80
 -15   5   0   46.00   11.50
  15   5   0   43.40    6.90
 -17  -5   0    0.80    5.60
  17  -5   0   -2.10   10.70
  17  -5   0    6.90    7.90
  17   5   0    2.70    4.50
 -17   5   0    5.30    3.90
  17   5   0   18.60   12.20
 -19  -5   0    7.40    6.60
  19  -5   0   34.70   12.00
 -19   5   0   26.40    6.10
  19   5   0   29.10   14.30
 -21  -5   0   28.80    8.00
  21  -5   0   37.00   12.40
  21   5   0   25.60    6.50
  21   5   0   29.80   14.80
  23  -5   0   20.20   13.20
  23   5   0   19.40   14.60
  23   5   0   14.80    6.60
  25  -5   0    5.70   11.10
  25   5   0   15.40   16.30
  25   5   0   20.20    7.40
   0  -6   0  222.18   25.20
   0  -6   0  189.18   23.70
   0  -6   0  240.38   20.70
   0   6   0  270.27   24.40
   0   6   0  245.78   21.10
   0   6   0  274.87   21.80
   2  -6   0  282.47   26.30
   2  -6   0  302.97   31.60
  -2  -6   0  262.67   27.30
  -2  -6   0  332.77   30.30
  -2  -6   0  313.87   26.70
  -2  -6   0  270.97   30.20
  -2   6   0  363.96   30.60
   2   6   0  352.76   27.50
   2   6   0  382.26   29.90
  -2   6   0  335.17   27.30
  -2   6   0  307.37   26.80
   2   6   0  313.77   26.80
   4  -6   0   -0.90    6.20
  -4  -6   0    2.80    6.30
  -4  -6   0    3.40    4.50
   4  -6   0    6.10    2.80
  -4  -6   0    1.50    3.30
   4   6   0    3.00    3.10
  -4   6   0    5.40    3.20
  -4   6   0    3.60    3.10
   4   6   0    2.10    6.20
   4   6   0    4.90    3.60
  -4   6   0    6.70    5.20
   4   6   0    4.40    3.00
   6  -6   0   92.89    9.50
   6  -6   0   65.69   13.50
  -6  -6   0   70.99   10.40
  -6  -6   0   85.49   12.10
  -6  -6   0   77.29   13.00
   6   6   0   82.99   14.10
   6   6   0   88.09   10.10
   6   6   0   84.19    9.50
  -6   6   0   92.89   10.10
  -6   6   0   99.49   10.00
  -6   6   0   82.49   14.10
   6   6   0   85.09   11.00
   8  -6   0  352.86   42.20
  -8  -6   0  509.85   38.00
   8  -6   0  421.16   36.30
  -8  -6   0  432.36   40.80
  -8  -6   0  406.36   37.00
  -8   6   0  443.66   36.30
  -8   6   0  496.65   43.90
  -8   6   0  434.36   36.70
   8   6   0  379.36   41.20
   8   6   0  501.05   37.00
 -10  -6   0  448.76   41.30
 -10  -6   0  524.65   46.00
 -10  -6   0  520.15   41.40
 -10   6   0  478.85   41.20
 -10   6   0  525.75   46.00
 -10   6   0  485.15   40.50
  10   6   0  489.85   41.00
 -12  -6   0 1317.07   97.69
 -12  -6   0 1186.28   98.09
  12  -6   0 1245.18  101.09
 -12  -6   0 1451.55  106.59
  12  -6   0 1112.39   97.79
 -12   6   0 1340.17  103.49
 -12   6   0 1223.28   97.09
  12   6   0 1267.07   98.39
  12   6   0  987.80  102.29
 -12   6   0 1225.38   98.29
 -14  -6   0  616.64   50.49
  14  -6   0  482.05   57.69
  14  -6   0  651.43   52.39
 -14   6   0  648.14   50.99
 -14   6   0  641.44   49.10
  14   6   0  617.54   49.90
  14   6   0  544.75   56.29
  16  -6   0  170.78   31.10
 -16  -6   0  223.38   23.10
  16  -6   0  222.18   24.00
 -16   6   0  237.48   19.60
  16   6   0  197.58   31.30
  16   6   0  192.28   20.10
 -18  -6   0   54.99    9.80
  18  -6   0   29.20   14.40
  18  -6   0   47.20   11.60
 -18   6   0   50.69    7.50
  18   6   0   61.99   18.60
  18   6   0   51.09    8.40
 -20  -6   0   16.80    7.70
  20  -6   0   10.80    8.90
  20   6   0   -2.30   11.50
 -20   6   0   14.10    4.20
  20   6   0    2.50    5.50
  22  -6   0    2.00   10.70
  22   6   0    2.80   13.00
  24  -6   0   -3.00    9.00
  24   6   0    3.60   13.00
   1  -7   0 1519.55  130.49
  -1  -7   0 1614.54  130.69
   1  -7   0 1610.24  135.49
  -1  -7   0 1649.83  134.89
   1   7   0 1633.54  130.99
  -1   7   0 1635.84  130.99
   1   7   0 1837.42  134.39
   1   7   0 1746.73  131.49
  -1   7   0 1656.53  131.29
  -1   7   0 1828.82  134.79
   3  -7   0  234.98   21.90
  -3  -7   0  237.38   26.60
  -3  -7   0  261.07   26.50
  -3  -7   0  202.88   23.00
   3  -7   0  223.08   28.00
   3   7   0  286.67   23.20
  -3   7   0  248.08   22.60
   3   7   0  296.97   25.60
  -3   7   0  294.17   27.00
  -3   7   0  283.87   23.00
   3   7   0  256.57   22.50
  -5  -7   0  477.35   43.70
   5  -7   0  473.65   45.80
   5  -7   0  420.66   38.60
  -5  -7   0  428.06   39.80
  -5  -7   0  499.35   42.20
  -5   7   0  483.05   39.40
   5   7   0  493.05   41.40
   5   7   0  554.54   40.40
   5   7   0  449.46   44.10
  -5   7   0  468.65   39.30
   5   7   0  478.55   39.20
   7  -7   0  502.15   69.79
  -7  -7   0  753.72   55.39
  -7  -7   0  596.04   53.29
   7  -7   0  630.84   52.39
   7   7   0  624.24   53.89
  -7   7   0  664.83   53.09
  -7   7   0  775.02   58.39
  -7   7   0  659.03   52.69
   7   7   0  597.94   57.99
   7   7   0  611.04   54.19
   7   7   0  658.23   52.69
  -9  -7   0 1596.44  117.09
   9  -7   0 1374.46  115.29
  -9  -7   0 1568.94  120.69
  -9  -7   0 1472.75  117.99
   9   7   0 1220.68  116.09
   9   7   0 1444.66  116.69
  -9   7   0 1482.45  115.79
  -9   7   0 1546.75  120.69
   9   7   0 1580.14  115.99
  -9   7   0 1497.35  115.29
   9   7   0 1332.77  120.79
 -11  -7   0 2359.66  166.18
  11  -7   0 2021.50  165.08
  11  -7   0 1751.72  171.98
 -11  -7   0 2100.69  165.78
  11   7   0 1922.81  170.88
 -11   7   0 2168.48  165.68
 -11   7   0 2249.47  164.88
  11   7   0 2232.88  165.48
 -13  -7   0 2351.06  172.28
 -13  -7   0 2086.69  172.48
  13  -7   0 2230.18  173.88
 -13   7   0 2198.88  172.78
  13   7   0 2222.88  172.18
 -13   7   0 2254.97  171.48
  13   7   0 1981.80  178.18
  15  -7   0  952.60   76.59
 -15  -7   0  873.71   74.59
  15   7   0  852.11   75.39
  15   7   0  841.92   81.39
 -15   7   0  973.90   75.39
 -15   7   0  980.80   73.49
 -17  -7   0  116.39   16.20
  17  -7   0  136.59   18.80
 -17   7   0  148.39   14.80
  17   7   0  130.29   26.10
 -19  -7   0   10.00    6.60
  19  -7   0    2.60   11.40
  19  -7   0    2.20    7.70
  19   7   0    2.30   13.40
 -19   7   0   10.40    5.60
  21  -7   0   24.30    9.80
 -21   7   0   14.60    4.30
  21   7   0   -5.20   12.60
 -21   7   0   11.80    5.10
  23  -7   0   -6.10    8.10
  23   7   0   -7.40   12.20
   0  -8   0   27.30    5.00
   0  -8   0   29.80    8.90
   0  -8   0   19.60    7.80
   0   8   0   38.90    6.60
   0   8   0   31.10    7.40
   2  -8   0    4.10    6.00
   2  -8   0    5.10    7.40
  -2  -8   0    4.00    6.60
   2  -8   0    4.80    3.10
  -2  -8   0    4.90    6.30
  -2   8   0    7.90    4.60
   2   8   0    6.10    4.00
   2   8   0    7.50    4.90
  -2   8   0    4.70    5.30
   2   8   0    8.40    4.00
  -2   8   0    8.60    4.00
  -4  -8   0   83.29   23.40
  -4  -8   0  138.59   19.30
  -4  -8   0  128.59   15.60
   4  -8   0  140.99   13.80
   4  -8   0  125.29   22.00
  -4   8   0  163.48   15.50
   4   8   0  152.78   14.80
  -4   8   0  153.98   14.90
  -4   8   0  136.39   18.60
   4   8   0  141.99   15.00
   4   8   0  152.98   17.70
  -6  -8   0  269.57   29.50
  -6  -8   0  232.78   25.00
  -6  -8   0  297.37   28.40
   6  -8   0  255.07   25.30
   6  -8   0  252.17   32.60
  -6   8   0  296.87   24.90
   6   8   0  274.67   24.80
  -6   8   0  272.47   28.40
  -6   8   0  293.87   29.60
   6   8   0  255.47   26.30
   6   8   0  273.57   24.30
  -8  -8   0  865.31   74.19
   8  -8   0  802.42   81.09
  -8  -8   0  955.90   78.99
  -8  -8   0 1031.20   76.49
   8  -8   0  886.41   72.99
  -8   8   0  878.21   78.59
   8   8   0 1022.00   74.19
   8   8   0  940.41   73.49
   8   8   0  859.71   79.49
   8   8   0  855.41   75.09
  10  -8   0 1021.00   99.99
 -10  -8   0 1117.09   92.19
 -10  -8   0 1323.07   93.89
  10  -8   0 1138.69   91.29
  10   8   0 1023.80   97.79
 -10   8   0 1279.87   92.29
  10   8   0  962.80   92.19
  10   8   0 1189.78   91.69
 -10   8   0 1245.18   95.59
 -12  -8   0 1353.86   99.79
 -12  -8   0 1168.28   98.89
 -12   8   0 1313.77   99.09
 -12   8   0 1218.08   99.09
  12   8   0 1057.69  104.79
 -14  -8   0  745.43   66.09
  14  -8   0  820.92   67.59
 -14  -8   0  853.11   66.09
 -14   8   0  811.82   66.39
 -14   8   0  801.82   65.09
  14   8   0  738.23   73.39
  16  -8   0   50.29   11.40
 -16  -8   0   33.90    9.40
  16  -8   0   48.00   18.00
  16   8   0   26.60   14.90
 -16   8   0   63.09    8.80
 -16   8   0   62.59   11.10
  18  -8   0   69.19   12.80
  18  -8   0   47.60   19.00
  18   8   0   28.90   16.00
 -18   8   0   54.29    8.70
  20  -8   0  -13.00   11.10
  20  -8   0   -0.20    8.20
  20   8   0   -1.30   12.60
 -20   8   0  -12.90    5.10
  22  -8   0    0.70    8.70
 -22   8   0    8.50    4.50
  22   8   0   16.20   15.70
 -22   8   0  -13.30    5.80
  -1  -9   0  656.23   68.69
   1  -9   0  657.23   68.49
  -1  -9   0  859.91   67.09
  -1  -9   0  782.72   82.69
   1  -9   0  769.42   71.69
   1   9   0  833.32   65.69
  -1   9   0  908.51   70.39
  -1   9   0  850.31   66.29
   1   9   0  925.01   69.99
  -1   9   0  791.82   65.49
  -3  -9   0  926.51   86.19
   3  -9   0 1011.00   81.49
   3  -9   0  862.51   85.09
   3  -9   0  962.90   88.99
  -3  -9   0 1010.30   86.99
  -3   9   0 1142.69   87.89
  -3   9   0 1077.39   82.29
   3   9   0 1096.19   82.39
  -3   9   0 1088.79   82.49
   5  -9   0  480.85   45.00
  -5  -9   0  523.15   50.79
  -5  -9   0  563.54   50.49
   5  -9   0  551.14   54.49
   5   9   0  576.34   49.00
   5   9   0  579.24   46.20
  -5   9   0  566.54   51.99
  -5   9   0  564.14   46.10
   7  -9   0  212.78   31.60
  -7  -9   0  200.58   22.10
   7  -9   0  203.78   20.20
  -7  -9   0  224.98   25.50
  -7   9   0  234.98   21.20
  -7   9   0  209.58   21.50
   7   9   0  215.58   23.50
   7   9   0  209.28   33.60
   7   9   0  225.08   21.10
   9  -9   0  228.08   34.70
  -9  -9   0  203.98   23.90
  -9  -9   0  260.17   27.00
   9   9   0  255.17   31.70
   9   9   0  256.47   23.10
  -9   9   0  266.07   23.80
   9   9   0  207.78   24.50
  -9   9   0  250.67   22.90
 -11  -9   0   27.40    8.70
  11  -9   0   28.30   15.70
 -11   9   0   65.19    9.90
  11   9   0   37.90   14.20
 -11   9   0   63.59    9.00
  11   9   0   39.80    8.50
  13  -9   0   11.60   14.80
 -13  -9   0   28.20    8.40
 -13  -9   0   37.80    9.10
 -13   9   0   43.50    7.60
 -13   9   0   32.00    7.80
  13   9   0   14.90   12.80
  13   9   0   32.40    7.60
 -15  -9   0  123.79   17.90
  15  -9   0  123.59   18.80
 -15  -9   0  138.99   18.20
 -15   9   0  168.38   18.10
 -15   9   0  135.09   15.90
  15   9   0  100.99   23.40
  17  -9   0  -10.00   12.70
  17  -9   0   11.80    8.10
 -17   9   0   14.70    7.80
 -17   9   0   -1.40    6.10
  17   9   0    9.30   13.60
  19  -9   0  100.39   16.60
  19  -9   0   60.69   21.10
  19   9   0   53.69   18.50
 -19   9   0   63.49   10.30
  21  -9   0   40.10   11.70
  21  -9   0   16.40   16.50
  21   9   0   44.10   17.20
   0 -10   0 2217.68  205.28
   0 -10   0 2635.74  208.58
   0 -10   0 2597.24  201.08
   0  10   0 2831.62  201.98
  -2 -10   0 1581.74  154.38
  -2 -10   0 1902.21  153.78
   2 -10   0 1563.04  150.88
   2 -10   0 1808.92  154.88
   2 -10   0 1789.92  146.89
  -2  10   0 2066.69  148.09
   2  10   0 2027.20  147.89
   2  10   0 2175.78  152.68
   4 -10   0  992.90   88.19
  -4 -10   0 1102.79   94.69
   4 -10   0 1046.30   97.59
   4 -10   0  919.41   92.79
  -4  10   0 1247.18   89.89
   4  10   0 1215.28   93.29
   4  10   0 1226.68   89.39
   6 -10   0  240.48   35.40
  -6 -10   0  274.97   31.60
   6  10   0  271.47   25.00
  -6  10   0  282.07   25.80
   6  10   0  259.97   27.90
  -8 -10   0    0.90    7.50
   8 -10   0   -2.00   11.50
   8  10   0   -2.10   11.10
   8  10   0   12.40    6.00
   8  10   0    3.10    6.70
  -8  10   0   -2.40    5.00
 -10 -10   0   25.20    9.80
  10 -10   0   22.40   14.70
  10  10   0    8.00   11.90
 -10  10   0   41.30    9.40
  10  10   0   31.10    8.20
  10  10   0   28.20    7.80
  12 -10   0    7.80   13.50
 -12 -10   0    3.80    7.90
  12  10   0   11.00    6.80
 -12  10   0   22.70    7.50
  12  10   0    8.20   12.10
 -14 -10   0   16.60    9.10
  14 -10   0   12.50   14.30
 -14  10   0   20.00    8.00
  14  10   0   26.40    7.70
  14  10   0   28.40   15.70
  16 -10   0   -9.70    7.10
 -16 -10   0  -10.10    7.10
 -16  10   0   -1.10    6.60
  16  10   0    0.70    6.70
  16  10   0    5.70   15.20
  18 -10   0   50.49   12.50
  18 -10   0   22.20   16.40
  18  10   0   26.40   16.70
  18  10   0   37.80   10.90
  20 -10   0   23.20   16.10
  20 -10   0   52.79   13.80
  20  10   0   57.89   19.20
  -1 -11   0 1905.01  172.48
   1 -11   0 1966.80  173.58
  -1  11   0 2194.38  166.38
   1  11   0 2352.96  166.48
  -3 -11   0  658.33   66.09
   3 -11   0  634.34   68.19
  -3  11   0  777.72   60.09
   3  11   0  781.32   59.79
  -5 -11   0  295.27   36.10
   5 -11   0  287.97   40.10
  -5  11   0  311.87   29.90
   5  11   0  363.56   29.70
  -7 -11   0   21.60   10.80
   7 -11   0   -0.50   12.00
   7  11   0   23.50    8.50
   7  11   0   23.80    7.20
  -7  11   0   38.00    9.40
   9 -11   0  107.09   25.60
  -9 -11   0  180.88   27.70
   9  11   0  179.78   18.30
  -9  11   0  182.58   19.30
   9  11   0  146.79   20.70
   9  11   0  148.59   27.50
  11 -11   0   12.20   13.30
 -11 -11   0   13.50    9.60
 -11  11   0   29.50    8.60
  11  11   0   26.20    7.90
  11  11   0   20.30    9.90
  11  11   0   49.40   18.30
 -13 -11   0   14.30    9.80
 -13  11   0   37.70   10.00
  13  11   0   28.30    8.10
  13  11   0   34.40   15.30
  15 -11   0   -8.20   13.00
  15  11   0   18.70    7.90
 -15  11   0   15.80    8.50
  15  11   0    8.70   14.20
  17 -11   0   -4.00   15.00
  17  11   0   19.50   16.50
 -17  11   0   20.60   10.30
  17  11   0   18.30    8.20
   0 -12   0  944.81   95.19
   0  12   0 1210.18   88.39
   2 -12   0    2.30   10.60
  -2 -12   0    2.20   10.70
  -2  12   0    3.30    7.30
   2  12   0    2.90    7.00
  -4 -12   0  196.68   30.80
   4 -12   0  159.28   33.60
   4  12   0  254.37   23.50
  -4  12   0  255.37   23.90
   6 -12   0  -12.70   12.10
  -6 -12   0   -2.80   10.00
  -6  12   0   -1.50    5.90
   6  12   0    0.10    6.10
   8 -12   0   -4.70   13.10
  -8 -12   0    1.00    9.80
   8  12   0   17.10    7.90
  -8  12   0   12.70    6.70
 -10 -12   0    0.50    9.70
  10 -12   0    4.50   18.60
 -10  12   0    5.80    6.90
  10  12   0    3.10    6.00
  10  12   0   13.00    7.60
 -12 -12   0  -10.70    9.40
  12 -12   0   -5.40   15.00
  12  12   0  -18.80   12.20
 -12  12   0   -5.50    7.40
  12  12   0  -11.20    5.70
  14 -12   0   34.60   19.40
 -14 -12   0   80.49   16.50
  14  12   0   67.89   19.90
  14  12   0   83.69   19.90
 -14  12   0  130.79   17.80
  16 -12   0   -7.90   15.60
  16 -12   0    7.60   11.10
  16  12   0   14.30   14.90
  16  12   0   17.80    8.20
 -16  12   0   -7.40    8.60
   1 -13   0   83.79   21.40
  -1 -13   0   97.19   22.30
  -1  13   0  132.99   16.70
   1  13   0  138.59   16.80
   3 -13   0   56.89   19.80
  -3 -13   0   61.79   18.70
  -3  13   0   95.59   14.50
   3  13   0   95.19   13.60
  -5 -13   0    4.70   11.70
   5 -13   0    2.30   13.90
  -5  13   0   20.60    9.30
   5  13   0   20.40    8.20
  -7 -13   0   -2.90   11.40
   7 -13   0   -1.30   14.10
  -7  13   0   22.40    9.20
   7  13   0   13.30    7.80
  -9 -13   0  249.58   35.60
   9 -13   0  187.88   39.70
   9  13   0  304.57   27.80
  -9  13   0  313.97   28.80
 -11 -13   0   84.59   18.90
  11 -13   0   66.69   24.40
  11  13   0  107.39   15.90
 -11  13   0  110.29   16.20
 -13 -13   0  187.08   32.40
  13  13   0  260.87   37.20
 -13  13   0  303.27   28.80
  13  13   0  283.37   27.60
   0 -14   0  107.59   24.40
  -2 -14   0  279.77   43.80
   2 -14   0  334.87   49.80
  -2  14   0  390.26   34.80
   2  14   0  396.26   34.70
  -4 -14   0   18.30   16.20
   4 -14   0   20.40   16.10
   4  14   0   64.79   12.80
  -4  14   0   57.29   11.80
   6 -14   0    7.80   16.60
  -6 -14   0   -1.70   12.40
   6  14   0   49.40   12.00
  -6  14   0   23.70   10.90
  -8 -14   0   -2.20   13.20
   8 -14   0   -2.90   13.70
   8  14   0   22.90   14.80
  -8  14   0   19.00    9.20
 -10 -14   0  158.08   33.00
 -10  14   0  250.47   26.50
  10  14   0  251.87   25.40
  -1 -15   0   68.59   23.10
   1 -15   0   48.80   20.50
  -1  15   0  102.69   17.50
   1  15   0  115.19   17.60
  -3 -15   0   20.70   17.80
   3 -15   0   20.70   16.60
  -3  15   0   84.19   23.80
  26   0  -1   -2.90   13.00
 -26   0   1  -21.90   10.90
  24   0  -1    2.60   13.80
 -24   0   1  -19.50   18.10
  22   0  -1   -4.40   11.60
 -22   0   1   -1.70    9.50
  20   0  -1   -6.30    9.80
 -20   0   1   -5.10    3.00
 -20   0   1   -2.50    8.60
 -18   0   1   -6.00    2.90
  18   0  -1    0.70    8.20
 -18   0   1    9.90    8.50
 -16   0   1   -3.50    2.20
  16   0  -1   -8.30    3.60
 -16   0   1    0.70    6.50
  16   0  -1  -10.40    6.80
 -16   0   1    3.60    5.40
 -14   0   1   -2.50    1.90
  14   0  -1   -1.20    3.70
  14   0  -1   -0.80    5.40
 -14   0   1    3.00    5.30
 -14   0   1   -0.90    4.80
  12   0  -1   -3.40    3.00
 -12   0   1    2.60    2.00
 -12   0   1   10.70    5.50
 -12   0   1    8.20    4.80
  12   0  -1    3.70    5.40
  10   0  -1    1.80    4.30
  10   0  -1    1.30    1.60
 -10   0   1   -2.30    3.20
 -10   0   1    1.70    1.70
 -10   0   1   -0.10    4.40
   8   0  -1   -2.00    2.80
  -8   0   1    2.30    3.60
  -8   0   1    0.30    1.50
   8   0  -1    1.30    1.30
  -8   0   1   -0.90    2.30
   6   0  -1    3.30    2.80
  -6   0   1    1.90    2.30
  -6   0   1    0.60    1.30
   6   0  -1    0.40    1.20
  -4   0   1   -0.20    0.80
  -4   0   1    0.40    1.50
   4   0  -1   -0.50    0.80
   4   0  -1    0.70    1.90
   4   0  -1   -0.20    1.00
  -2   0  -1    2.70    1.10
   2   0   1    0.80    0.70
  -2   0  -1    0.40    0.60
   2   0   1    0.10    0.80
  -4   0  -1    1.20    1.90
   4   0   1    3.00    1.90
   4   0   1    1.00    2.20
  -4   0  -1    2.80    1.60
   6   0   1    0.40    3.10
  -6   0  -1    0.60    2.90
   6   0   1    1.60    2.90
  -6   0  -1    0.50    2.30
   8   0   1    1.90    3.30
  -8   0  -1    0.80    2.90
  -8   0  -1    2.60    2.80
   8   0   1    1.30    3.50
 -10   0  -1   -3.70    3.60
  10   0   1   -3.20    4.70
 -10   0  -1    2.80    3.80
 -12   0  -1    1.20    4.30
  12   0   1   -3.40    5.00
 -12   0  -1    2.30    4.60
 -14   0  -1   -2.80    4.60
  14   0   1   -6.80    4.80
 -14   0  -1   -5.70    4.40
 -16   0  -1   -0.90    5.50
  16   0   1    8.30    8.00
  18   0   1   -2.60    9.00
 -18   0  -1    0.00    6.40
 -20   0  -1   -7.80    6.40
  20   0   1   12.10   10.20
  22   0   1  -11.20    9.70
 -22   0  -1  -12.00    6.90
  24   0   1  -20.40    9.90
  26   0   1  -16.70   11.30
  27  -1  -1   18.70   13.30
  27   1  -1   32.40   17.00
  25  -1  -1   10.90   12.50
 -25  -1   1   13.10   10.80
 -25   1   1   14.80   14.30
  25   1  -1   13.00   14.90
  23  -1  -1   86.79   19.20
 -23  -1   1   79.59   15.00
 -23  -1   1   96.99   11.20
 -23   1   1   94.39   17.30
  23   1  -1   70.29   17.00
  21  -1  -1  323.17   36.80
 -21  -1   1  338.07   35.40
 -21  -1   1  375.66   28.90
  21   1  -1  297.87   37.00
  19  -1  -1  384.36   39.00
 -19  -1   1  387.66   32.40
 -19  -1   1  407.56   38.80
 -19   1   1  385.06   31.80
 -19   1   1  410.86   40.10
  19   1  -1  399.86   40.20
 -17  -1   1 1104.29   90.39
  17  -1  -1 1088.59   90.69
 -17  -1   1 1113.29   85.69
 -17   1   1 1080.19   85.39
  17   1  -1 1052.89   91.19
 -17   1   1 1121.69   91.69
 -15  -1   1  763.12   68.59
  15  -1  -1  745.53   66.19
 -15  -1   1  913.01   69.39
  15  -1  -1  875.71   72.49
 -15  -1   1  842.32   64.79
  15   1  -1  737.73   65.09
 -15   1   1  924.61   68.59
 -15   1   1  801.82   64.59
  15   1  -1  860.41   70.89
 -15   1   1  832.12   69.99
 -13  -1   1  550.54   51.19
  13  -1  -1  650.53   51.59
  13  -1  -1  545.55   49.10
 -13  -1   1  632.04   48.00
 -13  -1   1  655.13   51.69
 -13   1   1  652.43   50.99
  13   1  -1  612.14   52.09
 -13   1   1  604.64   47.80
  13   1  -1  557.24   48.90
 -13   1   1  623.24   52.69
  11  -1  -1   85.19   11.80
  11  -1  -1   76.99    9.50
 -11  -1   1  108.29   12.60
 -11  -1   1   75.49   12.90
 -11  -1   1   83.79    8.20
  11   1  -1   77.29   12.90
 -11   1   1   84.49   13.90
  11   1  -1   86.19    8.60
 -11   1   1   84.49    8.30
 -11   1   1  100.79   11.10
  -9  -1   1  646.04   47.40
  -9  -1   1  583.64   44.60
   9  -1  -1  556.44   45.40
   9  -1  -1  559.24   46.40
  -9   1   1  507.05   44.50
   9   1  -1  597.74   47.50
  -9   1   1  619.74   46.40
  -9   1   1  516.65   47.60
   9   1  -1  539.95   44.70
   7  -1  -1 2276.77  171.58
   7  -1  -1 2385.06  172.38
  -7  -1   1 2347.17  171.08
   7   1  -1 2375.66  173.28
  -7   1   1 2021.60  171.38
   7   1  -1 2127.09  171.08
  -7   1   1 1972.70  173.28
  -5  -1   1 9999.00  714.63
   5  -1  -1 9252.47  713.73
   5  -1  -1 8840.12  713.33
   5   1  -1 9079.29  714.53
   5   1  -1 8679.43  713.03
  -5   1   1 9751.22  713.63
  -3  -1   1  143.79   11.70
   3  -1  -1  142.39   10.60
  -3  -1   1  129.39   10.40
   3  -1  -1  127.29   10.50
  -3   1   1  103.29   11.60
   3   1  -1  127.49   11.70
  -3   1   1  127.59   10.50
   3   1  -1  117.29   10.30
   1  -1   1   47.80    3.70
   1  -1   1   47.20    3.70
   1   1   1   38.40    3.90
   1   1   1   46.50    4.50
  -1   1  -1   33.60    4.30
   3  -1   1  255.77   21.80
   3  -1   1  292.97   23.20
  -3  -1  -1  263.47   22.60
  -3  -1  -1  228.38   21.60
   3   1   1  264.27   22.60
   3   1   1  275.37   21.60
  -3   1  -1  300.17   21.40
  -3   1  -1  312.27   23.00
   5  -1   1 2075.99  166.28
  -5  -1  -1 2357.96  167.68
  -5  -1  -1 2036.50  165.18
   5  -1   1 1923.11  166.78
   5  -1   1 2058.29  165.68
   5   1   1 2241.18  166.78
   5   1   1 2108.99  165.08
  -5   1  -1 2337.37  166.88
   7  -1   1 1659.63  152.58
  -7  -1  -1 2153.88  152.88
   7  -1   1 1949.70  152.38
  -7  -1  -1 1834.92  150.58
  -7  -1  -1 1948.31  151.18
   7   1   1 1856.21  150.48
  -7   1  -1 2017.70  152.68
   7   1   1 2051.89  152.88
  -7   1  -1 2102.89  152.48
  -9  -1  -1 1679.23  125.89
   9  -1   1 1587.84  125.49
   9  -1   1 1522.35  124.19
  -9  -1  -1 1560.44  124.09
   9   1   1 1664.63  126.09
   9   1   1 1476.55  122.99
  -9   1  -1 1572.34  127.19
  -9   1  -1 1680.63  125.49
 -11  -1  -1  787.42   63.59
 -11  -1  -1  904.41   67.29
 -11  -1  -1  840.12   65.29
  11  -1   1  796.32   66.69
  11  -1   1  746.93   64.89
  11   1   1  823.52   67.39
 -11   1  -1  900.01   66.79
 -11   1  -1  806.22   66.59
  11   1   1  752.72   63.49
 -13  -1  -1   18.10    5.10
  13  -1   1   17.00    6.90
  13  -1   1   15.00    6.10
 -13  -1  -1   16.40    5.80
 -13  -1  -1   17.80    3.20
  13   1   1   18.90    7.60
  13   1   1   18.20    3.00
 -13   1  -1   14.10    7.30
 -13   1  -1    9.00    5.70
  15  -1   1   10.00    4.60
 -15  -1  -1   10.70    3.00
 -15  -1  -1   13.20    7.30
  15  -1   1   -1.10    6.60
 -15  -1  -1   13.20    9.60
  15   1   1    8.90    8.10
 -15   1  -1    6.50    5.80
  15   1   1    8.20    2.60
 -15   1  -1   10.50    6.30
 -17  -1  -1  278.47   26.80
  17  -1   1  253.57   29.40
  17   1   1  262.87   30.50
 -17   1  -1  320.67   29.60
  19  -1   1  131.49   20.10
 -19  -1  -1  125.09   16.40
 -19   1  -1  114.29   19.00
  19   1   1   99.39   18.50
  21  -1   1  621.24   56.99
 -21  -1  -1  621.44   52.19
 -21   1  -1  615.24   54.89
  21   1   1  570.74   57.29
  23  -1   1  -27.60   20.60
 -23  -1  -1   -9.40    6.60
 -23   1  -1  -15.70    9.40
  23   1   1   -3.30   14.30
 -25  -1  -1   -3.90    7.00
  25  -1   1   -1.30   12.70
  25   1   1   16.90   12.40
  26  -2  -1   68.29   17.80
 -26  -2   1   47.90   11.50
  26   2  -1   78.09   19.70
  24  -2  -1   14.40   13.10
 -24  -2   1  -14.30    8.30
 -24  -2   1   -7.20    4.50
  24   2  -1   -6.40   13.00
 -22  -2   1   -5.20    8.40
  22  -2  -1  -11.10    9.60
  22   2  -1   10.60   13.20
 -22   2   1  -12.90    9.80
 -20  -2   1  191.18   23.90
 -20  -2   1  206.48   18.20
  20  -2  -1  164.48   24.70
  20   2  -1  178.38   18.00
  20   2  -1  182.08   26.80
 -20   2   1  231.38   27.80
  18  -2  -1 1600.34  124.79
 -18  -2   1 1654.63  119.99
 -18  -2   1 1464.55  123.49
  18   2  -1 1433.06  125.79
 -18   2   1 1748.82  127.19
  18   2  -1 1307.07  119.99
 -18   2   1 1537.75  119.09
  16  -2  -1 1155.98   88.39
 -16  -2   1 1131.79   84.09
 -16  -2   1 1038.10   87.39
  16   2  -1  991.40   84.19
 -16   2   1 1106.99   89.89
 -16   2   1 1057.69   83.49
  16   2  -1 1002.50   89.19
 -14  -2   1 1018.00   75.69
  14  -2  -1  901.01   74.29
  14  -2  -1  834.72   72.19
 -14  -2   1  789.72   79.99
 -14  -2   1  992.50   71.19
 -14   2   1  841.42   70.79
  14   2  -1  833.62   71.19
 -14   2   1  947.71   76.39
  14   2  -1  845.72   77.09
 -14   2   1 1039.80   75.49
  12  -2  -1  273.37   24.90
 -12  -2   1  292.97   23.80
 -12  -2   1  344.47   28.30
  12  -2  -1  306.97   26.90
  12   2  -1  265.97   23.90
  12   2  -1  313.87   28.70
 -12   2   1  313.77   29.30
 -12   2   1  246.38   23.50
 -10  -2   1  677.33   51.09
  10  -2  -1  635.14   51.89
  10  -2  -1  646.34   52.99
 -10   2   1  664.63   55.19
  10   2  -1  617.84   51.09
  10   2  -1  636.14   54.59
   8  -2  -1  994.10   74.09
  -8  -2   1  921.91   72.69
   8  -2  -1  951.10   73.29
  -8   2   1  884.41   75.69
  -8   2   1  928.11   73.29
   8   2  -1  918.71   72.79
   8   2  -1  919.21   75.49
  -6  -2   1 1630.24  115.19
   6  -2  -1 1484.25  113.29
   6  -2  -1 1433.66  112.89
  -6  -2   1 1434.36  112.59
   6   2  -1 1390.86  114.89
   6   2  -1 1398.16  112.59
  -6   2   1 1400.56  112.89
   4  -2  -1 2273.77  206.58
  -4  -2   1 2848.62  206.78
   4  -2  -1 2722.83  204.88
  -4  -2   1 2806.62  204.78
  -4  -2   1 2492.55  205.28
  -4   2   1 2760.92  206.88
   4   2  -1 2524.85  206.58
   4   2  -1 2734.33  204.78
  -4   2   1 2705.53  204.98
  -2  -2   1  530.85   39.60
   2  -2  -1  490.45   38.80
  -2  -2   1  541.65   38.90
   2  -2  -1  432.46   40.20
  -2  -2   1  447.86   40.10
   2   2  -1  557.74   38.90
   2   2  -1  431.46   40.10
   2   2  -1  489.65   39.60
  -2   2   1  490.05   38.80
  -2   2   1  513.25   40.30
   0  -2  -1   33.10    3.70
   0  -2  -1   36.00    4.90
   0  -2   1   30.70    3.30
   0  -2  -1   34.90    5.10
   0  -2   1   47.50    5.80
   0   2  -1   33.70    3.40
   0   2   1   29.40    4.70
   0   2  -1   41.10    5.00
   0   2  -1   37.70    3.80
   0   2   1   42.90    5.00
   0   2   1   42.60    4.20
   2  -2   1  744.13   62.29
  -2  -2  -1  790.02   62.79
  -2  -2  -1  830.52   63.69
   2  -2   1  749.73   62.39
   2  -2   1  822.92   64.09
  -2   2  -1  785.82   62.39
   2   2   1  902.11   62.79
  -2   2  -1  862.31   64.09
  -2   2  -1  803.62   62.39
   2   2   1  774.42   63.69
   2   2   1  768.02   62.59
  -4  -2  -1  838.32   69.89
   4  -2   1  836.92   69.79
   4  -2   1  924.71   72.09
  -4  -2  -1 1030.20   71.69
  -4   2  -1  827.72   69.79
   4   2   1  898.21   71.49
   4   2   1  932.31   69.89
  -4   2  -1  893.21   69.49
  -6  -2  -1 5864.21  487.65
   6  -2   1 5951.60  487.85
   6  -2   1 6023.50  490.15
  -6  -2  -1 7090.59  489.85
   6  -2   1 6302.47  488.75
  -6   2  -1 6723.03  491.55
   6   2   1 6465.75  489.75
   6   2   1 6646.13  487.65
  -6   2  -1 5923.31  487.15
  -8  -2  -1 4170.88  296.27
   8  -2   1 3749.43  294.17
  -8  -2  -1 3759.12  293.67
   8  -2   1 3205.78  296.17
   8  -2   1 3750.32  295.17
  -8   2  -1 4021.00  296.37
   8   2   1 3810.02  293.47
   8   2   1 3982.80  296.37
 -10  -2  -1 1556.44  109.69
  10  -2   1 1345.27  107.09
 -10  -2  -1 1286.97  106.19
  10  -2   1 1347.17  108.39
 -10   2  -1 1436.36  109.49
  10   2   1 1258.77  105.89
  10   2   1 1347.67  109.49
  12  -2   1 1424.96  116.99
  12  -2   1 1426.76  115.39
 -12  -2  -1 1423.06  114.29
 -12  -2  -1 1639.04  118.89
 -12   2  -1 1520.55  117.99
  12   2   1 1384.86  117.99
 -14  -2  -1  116.79   12.20
  14  -2   1   95.59   14.40
 -14  -2  -1  117.39   15.40
  14  -2   1  107.09   12.30
 -14  -2  -1  101.49   10.60
  14   2   1   93.19   10.20
  14   2   1   68.89   13.60
 -14   2  -1  119.29   15.60
  16  -2   1   67.59   13.60
 -16  -2  -1   94.89   11.50
 -16  -2  -1   82.69    9.60
  16   2   1   60.79   14.10
 -16   2  -1  109.29   16.70
  16   2   1   71.49    9.00
  18  -2   1  554.14   50.89
 -18   2  -1  631.64   51.89
  18   2   1  511.45   45.20
  18   2   1  570.74   52.69
  20  -2   1  343.57   36.90
 -20   2  -1  364.16   36.70
  22  -2   1   29.40   14.20
  22   2   1   27.50   14.20
 -22   2  -1   29.60   11.30
  24  -2   1    5.50   11.70
  24   2   1    4.40   12.20
  26  -2   1   48.10   16.30
  26   2   1   55.39   18.70
 -25  -3   1    9.50    5.90
  25  -3  -1  -12.00    9.70
  25   3  -1   -4.60   12.00
  23  -3  -1   -8.30    9.20
 -23  -3   1   -9.40    5.00
  23   3  -1    5.30   13.40
  23   3  -1   -5.90    4.00
 -21  -3   1    0.50    4.60
  21  -3  -1   -9.80    8.20
 -21  -3   1    1.00    7.70
  21   3  -1   -5.80   10.30
  21   3  -1    6.90    4.50
 -19  -3   1   37.40   10.10
  19  -3  -1   21.10   10.10
 -19  -3   1   42.30    7.20
  19   3  -1   49.10   15.00
 -19   3   1   35.70   12.70
  19   3  -1   34.50    6.20
 -17  -3   1  540.55   41.30
 -17  -3   1  459.45   44.20
  17  -3  -1  527.85   45.20
 -17   3   1  495.45   40.20
  17   3  -1  466.75   41.00
 -17   3   1  584.84   48.80
  17   3  -1  432.76   47.00
  15  -3  -1  316.97   37.00
 -15  -3   1  375.06   31.90
  15  -3  -1  311.97   27.30
 -15  -3   1  306.97   26.20
  15   3  -1  281.17   25.90
 -15   3   1  342.47   32.90
  15   3  -1  265.97   31.50
 -15   3   1  286.07   25.40
  13  -3  -1  404.06   34.90
  13  -3  -1  391.96   37.00
 -13  -3   1  410.56   32.40
  13   3  -1  360.76   32.20
 -13   3   1  404.66   37.90
 -11  -3   1  800.92   58.89
  11  -3  -1  659.53   55.09
  11  -3  -1  672.53   56.19
 -11  -3   1  667.83   54.49
 -11   3   1  727.93   59.19
 -11   3   1  681.33   55.39
  11   3  -1  621.84   54.29
  -9  -3   1  693.03   62.59
  -9  -3   1  797.12   62.19
   9  -3  -1  826.72   63.39
   9  -3  -1  761.92   62.59
   9   3  -1  820.32   62.19
   9   3  -1  798.22   66.09
  -9   3   1  804.52   66.09
  -9   3   1  805.82   62.69
  -7  -3   1   23.20    3.70
  -7  -3   1   26.20    5.00
   7  -3  -1   15.80    6.00
   7  -3  -1   23.80    4.20
  -7  -3   1   29.80    7.30
   7   3  -1   21.20    7.20
   7   3  -1   26.30    3.90
  -7   3   1   31.60    6.90
  -7   3   1   22.70    4.20
   5  -3  -1  326.27   33.10
   5  -3  -1  371.96   30.10
  -5  -3   1  383.96   30.80
  -5  -3   1  388.86   32.90
  -5  -3   1  409.96   30.30
  -5   3   1  409.16   33.10
   5   3  -1  316.37   30.60
   5   3  -1  401.46   30.20
   5   3  -1  359.66   33.00
  -5   3   1  371.56   30.20
  -3  -3   1 2869.91  238.98
  -3  -3   1 3381.66  237.58
  -3  -3   1 3064.99  236.58
   3  -3  -1 3003.60  236.48
   3  -3  -1 2802.92  238.68
   3   3  -1 2701.13  238.38
   3   3  -1 3079.39  237.58
  -3   3   1 3048.79  236.58
   3   3  -1 3583.24  237.28
  -1  -3   1  151.78   12.80
   1  -3  -1  147.79   13.00
   1  -3  -1  141.59   15.30
  -1  -3   1  159.08   14.60
  -1  -3   1  156.38   13.40
  -1  -3   1  123.29   15.00
  -1   3   1  177.38   15.10
   1   3  -1  143.39   12.90
  -1   3   1  147.29   13.10
   1   3  -1  171.48   13.30
   1   3  -1  172.38   14.80
  -1  -3  -1  598.44   47.80
   1  -3   1  561.44   46.00
   1  -3   1  559.74   46.50
   1  -3   1  675.13   48.70
  -1  -3  -1  608.84   46.50
  -1  -3  -1  528.95   47.70
  -1   3  -1  638.24   46.50
  -1   3  -1  558.94   46.10
   1   3   1  677.33   47.60
   1   3   1  494.35   47.70
   1   3   1  575.04   46.40
   1   3   1  580.84   46.60
  -3  -3  -1 1709.53  129.39
   3  -3   1 1452.95  127.29
   3  -3   1 1574.64  127.29
  -3  -3  -1 1734.63  128.09
   3  -3   1 1729.73  130.09
  -3   3  -1 1755.22  127.39
   3   3   1 1794.92  127.89
   3   3   1 1439.76  129.09
  -3   3  -1 1591.64  127.29
  -5  -3  -1 1517.25  107.19
   5  -3   1 1396.66  107.89
  -5  -3  -1 1231.88  104.79
  -5  -3  -1 1448.16  104.69
   5  -3   1 1279.37  104.69
  -5   3  -1 1529.55  107.59
  -5   3  -1 1274.47  104.69
   5   3   1 1240.38  106.79
  -5   3  -1 1334.17  104.39
   5   3   1 1433.26  105.59
   5   3   1 1139.29  104.39
   7  -3   1 1798.82  146.39
  -7  -3  -1 2115.09  145.79
   7  -3   1 1705.63  142.99
  -7  -3  -1 1621.14  142.79
  -7   3  -1 1770.92  142.29
  -7   3  -1 1762.52  143.09
   7   3   1 1933.11  142.79
  -7   3  -1 2080.79  146.09
   7   3   1 1788.22  145.39
   9  -3   1  165.18   16.10
  -9  -3  -1  225.58   19.90
   9  -3   1  190.78   17.80
  -9  -3  -1  155.98   15.90
   9  -3   1  152.28   20.80
  -9   3  -1  190.48   19.70
   9   3   1  176.08   15.40
  -9   3  -1  178.38   14.90
   9   3   1  185.28   20.20
 -11  -3  -1  309.17   27.40
 -11  -3  -1  362.26   31.40
  11  -3   1  270.47   32.40
  11  -3   1  328.17   28.10
  11  -3   1  336.07   29.70
 -11   3  -1  375.16   32.00
  11   3   1  317.17   31.70
 -11   3  -1  340.87   26.40
  11   3   1  331.37   27.10
  13  -3   1  193.58   17.80
  13  -3   1  146.49   23.00
 -13  -3  -1  229.88   22.00
 -13  -3  -1  156.08   16.70
 -13   3  -1  213.28   22.20
  13   3   1  191.48   22.70
  13   3   1  172.58   16.10
  15  -3   1   18.70    7.20
 -15  -3  -1   15.70    5.00
  15  -3   1   19.00    9.80
 -15   3  -1   20.30    8.40
  15   3   1   15.80    3.90
  15   3   1   18.30    9.50
  17  -3   1   11.50    7.80
 -17  -3  -1    1.80    4.60
 -17   3  -1   10.40    8.30
  17   3   1    5.50    3.90
  17   3   1    6.60    9.30
  19  -3   1   20.40    9.90
  19   3   1   19.20   10.80
  19   3   1   10.10    4.30
 -19   3  -1   16.20    9.20
  21  -3   1    5.20   11.10
  21   3   1    8.30    4.40
  21   3   1   10.80   11.60
  23  -3   1   23.70   13.20
  23   3   1   22.90   13.60
  25  -3   1   21.90   14.70
  25   3   1   14.80   14.70
  26  -4  -1   30.50   14.00
  26   4  -1   55.39   19.10
  24  -4  -1    9.80   21.80
 -24  -4   1   12.70    6.50
  24   4  -1   12.90   12.60
 -22  -4   1   -1.90    5.40
  22  -4  -1   -1.20    9.20
  22   4  -1   12.30   13.00
  22   4  -1    0.20    4.90
 -20  -4   1   31.60    6.60
 -20  -4   1   36.60    7.50
  20  -4  -1   30.30   10.10
  20   4  -1   32.10    6.60
  20   4  -1   27.10   13.20
 -18  -4   1  111.89   13.50
 -18  -4   1  129.29   13.90
  18  -4  -1  110.69   17.70
 -18   4   1  124.19   11.80
  18   4  -1  116.69   13.00
  18   4  -1  104.69   20.50
 -18   4   1  104.89   22.10
 -16  -4   1  262.17   25.80
 -16  -4   1  323.07   26.00
  16  -4  -1  322.97   29.30
 -16   4   1  282.97   24.70
  16   4  -1  280.77   25.30
 -16   4   1  309.47   32.30
  16   4  -1  284.57   32.30
  14  -4  -1   26.90    6.20
 -14  -4   1   43.70   10.30
 -14  -4   1   25.50    5.70
 -14  -4   1   21.60    5.20
  14  -4  -1   30.10    7.50
  14  -4  -1   16.00    9.70
  14   4  -1   23.90    4.90
  14   4  -1   28.10   10.70
 -12  -4   1   15.40    9.60
 -12  -4   1    9.90    3.50
  12  -4  -1   14.70    5.70
 -12  -4   1    8.60    4.00
  12  -4  -1   12.60    8.30
  12  -4  -1   12.90    5.20
 -12   4   1   11.40    4.20
  12   4  -1    8.90    3.40
  12   4  -1   15.20    8.50
 -12   4   1    5.00    6.10
 -10  -4   1  481.95   38.60
 -10  -4   1  419.36   33.90
 -10  -4   1  399.96   34.00
  10  -4  -1  326.37   38.60
  10  -4  -1  381.06   33.80
  10  -4  -1  413.76   34.90
  10   4  -1  415.76   33.60
  10   4  -1  377.66   38.20
 -10   4   1  469.95   38.90
 -10   4   1  414.26   34.20
  -8  -4   1 1160.98   87.89
   8  -4  -1  928.11   91.79
  -8  -4   1 1111.39   88.29
  -8  -4   1 1298.47   91.99
   8  -4  -1 1091.49   87.89
  -8   4   1 1179.88   91.69
   8   4  -1 1110.49   87.79
   8   4  -1 1076.79   91.69
  -8   4   1 1114.49   88.09
  -6  -4   1 1172.98   84.59
  -6  -4   1 1050.69   87.29
   6  -4  -1  934.71   87.79
   6  -4  -1 1009.30   84.29
  -6  -4   1 1164.78   85.29
   6   4  -1 1207.78   84.59
   6   4  -1  910.31   84.99
  -6   4   1 1192.48   87.89
  -6   4   1 1103.19   84.59
   6   4  -1  995.80   87.59
  -4  -4   1 1072.09   76.49
   4  -4  -1  861.41   78.19
  -4  -4   1  864.91   77.49
   4  -4  -1  947.11   74.99
  -4  -4   1 1012.70   75.39
   4   4  -1 1014.70   75.29
  -4   4   1 1038.60   78.09
  -4   4   1  957.80   75.19
   4   4  -1  938.21   74.89
   4   4  -1  951.50   76.39
   4   4  -1  835.22   77.69
  -2  -4   1  763.12   61.49
  -2  -4   1  692.03   63.39
   2  -4  -1  710.73   63.89
  -2  -4   1  850.71   63.09
   2  -4  -1  756.72   61.19
  -2   4   1  739.23   61.39
  -2   4   1  767.52   61.29
   2   4  -1  871.41   64.69
  -2   4   1  826.52   63.69
   2   4  -1  835.32   61.59
   2   4  -1  745.73   60.99
   0  -4  -1  399.66   38.10
   0  -4   1  495.55   39.20
   0  -4  -1  464.15   36.70
   0  -4  -1  453.55   39.00
   0  -4   1  439.56   36.20
   0  -4   1  432.06   36.90
   0   4   1  433.76   36.90
   0   4   1  434.76   36.70
   0   4  -1  496.35   36.90
   0   4  -1  467.65   36.40
   0   4  -1  518.05   39.10
   2  -4   1  108.79   12.90
  -2  -4  -1  107.99   13.70
   2  -4   1   91.19    9.10
  -2  -4  -1   97.19   11.40
   2  -4   1   96.79    9.80
   2   4   1   93.99    9.50
   2   4   1   95.09   12.30
  -2   4  -1   98.69    9.70
   2   4   1  104.69   10.00
   2   4   1  116.49   11.10
  -2   4  -1  119.99   12.50
  -2   4  -1  104.79    9.40
   4  -4   1   56.79    6.40
  -4  -4  -1   53.09    7.40
   4  -4   1   66.19   11.30
  -4  -4  -1   61.49    8.30
  -4  -4  -1   55.19    9.30
   4   4   1   57.29    6.90
   4   4   1   50.09   10.20
  -4   4  -1   62.59    7.00
   4   4   1   76.79    7.70
  -4   4  -1   64.89    9.80
   4   4   1   70.19    7.40
  -4   4  -1   58.49    6.80
   6  -4   1    4.60    5.50
   6  -4   1    3.00    2.50
  -6  -4  -1    4.20    5.10
  -6  -4  -1    0.60    3.00
   6   4   1    5.70    6.30
   6   4   1    3.30    2.70
  -6   4  -1    4.00    2.90
  -6   4  -1    8.80    4.30
   8  -4   1   53.09   11.70
  -8  -4  -1   50.09    7.60
  -8  -4  -1   87.69   12.90
   8  -4   1   51.99    7.50
   8   4   1   46.20   10.00
  -8   4  -1   61.89    7.60
  -8   4  -1   65.19   11.40
  -8   4  -1   68.09    8.00
   8   4   1   65.99    7.60
 -10  -4  -1  109.49   14.30
  10  -4   1   92.19   11.90
  10  -4   1   87.69   10.00
  10  -4   1   75.29   14.60
 -10  -4  -1   80.19   10.20
 -10   4  -1   97.79    9.00
 -10   4  -1  100.09   10.50
 -10   4  -1   95.29   14.40
  10   4   1   83.89   14.10
  10   4   1   79.99    9.30
  12  -4   1   35.20   11.70
 -12  -4  -1   79.99   12.60
 -12  -4  -1   46.00    7.80
  12  -4   1   68.19   10.30
  12  -4   1   50.39    9.10
 -12   4  -1   74.09    7.10
  12   4   1   56.79    7.80
 -12   4  -1   80.19   14.20
  14  -4   1   42.90    8.20
  14  -4   1   35.20    8.90
  14  -4   1   21.80   10.40
 -14  -4  -1   29.10    6.60
 -14   4  -1   54.99    6.10
 -14   4  -1   40.70   13.50
  14   4   1   31.20   11.40
  14   4   1   37.90    6.10
  16  -4   1  183.98   29.60
 -16  -4  -1  253.07   22.10
  16  -4   1  244.28   25.60
 -16   4  -1  273.37   28.70
  16   4   1  241.08   21.20
  16   4   1  217.28   29.00
  18  -4   1  661.53   55.39
  18   4   1  601.44   50.39
  18   4   1  546.15   57.49
 -18   4  -1  680.53   63.99
  20  -4   1  418.16   38.60
  20   4   1  359.66   31.90
  20   4   1  351.16   41.10
  22  -4   1   79.69   15.80
  22   4   1   91.59   22.50
  22   4   1   95.89   11.80
  24  -4   1   75.59   18.50
  24   4   1   69.79   20.40
  24   4   1   80.39   11.70
  25  -5  -1   38.40   14.10
  25   5  -1   29.70   17.30
  25   5  -1   26.70    7.90
  23  -5  -1   -5.40    8.30
 -23  -5   1    5.60    6.20
  23   5  -1   -2.70   11.90
  23   5  -1   -6.00    5.50
 -21  -5   1   55.29   10.70
  21  -5  -1   52.99   13.70
  21   5  -1   55.89   18.60
 -21   5   1   75.19    9.50
 -21   5   1   66.49    8.60
  21   5  -1   47.60    8.90
  19  -5  -1  502.55   43.50
 -19  -5   1  495.45   40.20
 -19   5   1  500.75   38.20
  19   5  -1  373.96   46.50
 -19   5   1  461.85   38.10
  19   5  -1  415.26   39.00
 -17  -5   1  894.41   69.49
  17  -5  -1  890.31   72.99
 -17  -5   1  912.51   70.19
  17   5  -1  732.53   75.89
 -15  -5   1  504.25   39.30
  15  -5  -1  452.75   41.00
 -15  -5   1  485.05   38.80
  15   5  -1  371.96   44.70
 -15   5   1  497.65   45.40
  15   5  -1  437.96   38.50
 -13  -5   1   10.80    4.50
  13  -5  -1   11.70    5.10
  13  -5  -1    8.90    5.80
 -13  -5   1   17.70    4.40
 -13  -5   1    9.90    8.70
  13  -5  -1    3.00   14.20
 -13   5   1   16.20    7.50
 -13   5   1   12.70    4.70
  13   5  -1   13.80    4.10
  13   5  -1    1.60    9.30
  11  -5  -1   36.20   11.30
 -11  -5   1   46.20   11.50
 -11  -5   1   52.59    7.90
 -11  -5   1   51.59    7.40
  11  -5  -1   44.40    7.80
  11  -5  -1   56.79    7.90
  11   5  -1   46.30    6.60
 -11   5   1   52.09    7.70
 -11   5   1   43.60   10.00
  11   5  -1   24.20   11.00
   9  -5  -1 1165.78   97.19
  -9  -5   1 1369.56  101.79
   9  -5  -1 1119.39  102.59
  -9  -5   1 1253.97   97.49
  -9  -5   1 1282.37   97.89
   9   5  -1 1148.89  101.69
  -9   5   1 1243.58  101.39
   9   5  -1 1281.67   97.39
  -9   5   1 1247.48   97.59
   7  -5  -1 2963.10  237.58
  -7  -5   1 3060.19  237.88
   7  -5  -1 2672.63  241.88
  -7  -5   1 3263.27  241.58
  -7  -5   1 3382.66  238.78
   7   5  -1 2907.81  241.68
   7   5  -1 3279.07  237.88
   7   5  -1 2612.44  238.38
  -7   5   1 3345.87  241.78
  -7   5   1 3157.08  237.98
  -5  -5   1 3349.36  271.27
   5  -5  -1 3204.58  272.17
  -5  -5   1 3421.16  268.37
  -5  -5   1 3873.51  269.77
   5  -5  -1 3406.56  267.97
   5   5  -1 3139.99  271.47
   5   5  -1 3427.96  267.87
   5   5  -1 3385.66  269.57
  -5   5   1 3508.95  268.27
  -5   5   1 3791.92  271.77
   5   5  -1 3744.63  268.47
  -5   5   1 3271.17  268.07
   3  -5  -1 2226.48  179.48
  -3  -5   1 2521.65  181.78
   3  -5  -1 2326.27  183.58
  -3  -5   1 2254.97  179.98
  -3  -5   1 2057.79  182.18
   3   5  -1 2077.99  182.58
   3   5  -1 2505.65  181.88
   3   5  -1 2258.67  179.38
  -3   5   1 2293.47  179.78
  -3   5   1 2506.15  182.68
  -3   5   1 2162.08  179.68
   3   5  -1 2547.05  180.08
  -1  -5   1 1425.76  105.59
  -1  -5   1 1241.58  106.09
   1  -5  -1 1333.47  105.69
   1  -5  -1 1305.27  108.89
   1  -5  -1 1165.38  107.39
  -1  -5   1 1522.25  108.79
  -1  -5   1 1156.38  107.99
  -1   5   1 1483.55  108.49
   1   5  -1 1544.45  108.59
  -1   5   1 1348.17  105.99
   1   5  -1 1464.05  106.19
   1   5  -1 1304.47  105.59
  -1   5   1 1292.67  106.09
  -1  -5  -1  372.16   33.20
  -1  -5  -1  345.97   32.90
   1  -5   1  325.37   30.70
   1  -5   1  384.46   33.90
   1  -5   1  348.77   30.00
  -1  -5  -1  362.26   30.50
   1   5   1  377.66   30.60
  -1   5  -1  356.06   30.20
   1   5   1  432.66   32.80
   1   5   1  365.56   30.90
  -1   5  -1  417.76   33.60
  -1   5  -1  387.36   30.70
  -3  -5  -1  119.09   15.30
   3  -5   1  130.09   16.80
  -3  -5  -1  129.49   14.60
   3  -5   1  116.89   11.40
   3   5   1  143.59   12.70
  -3   5  -1  130.49   12.20
  -3   5  -1  116.79   11.70
   3   5   1  145.19   15.20
   3   5   1   84.89   15.10
   3   5   1  123.59   12.00
  -3   5  -1  149.29   15.60
  -5  -5  -1    7.20    4.10
  -5  -5  -1    5.90    6.90
  -5  -5  -1    8.30    4.50
   5  -5   1    5.10    2.90
   5  -5   1    5.10    5.60
   5   5   1    9.00    3.80
   5   5   1    9.60    3.60
  -5   5  -1   12.20    3.50
   5   5   1    9.90    3.70
  -5   5  -1    6.90    3.40
   5   5   1    7.20    6.80
  -5   5  -1   14.80    6.00
  -7  -5  -1 4151.88  299.37
   7  -5   1 3658.03  298.57
   7  -5   1 3784.12  303.67
  -7  -5  -1 3430.26  298.87
  -7  -5  -1 4340.17  302.67
   7   5   1 3537.65  302.17
   7   5   1 4210.58  299.07
  -7   5  -1 4235.98  302.77
  -7   5  -1 3763.22  298.77
  -7   5  -1 4016.90  298.47
   7   5   1 3342.27  298.67
  -9  -5  -1  596.14   46.60
  -9  -5  -1  470.15   42.30
  -9  -5  -1  547.35   43.40
   9  -5   1  466.35   47.70
   9  -5   1  487.15   42.00
  -9   5  -1  506.85   42.30
   9   5   1  560.94   42.20
   9   5   1  449.95   46.10
  -9   5  -1  541.25   41.50
  -9   5  -1  521.95   46.10
 -11  -5  -1  127.49   14.70
  11  -5   1  172.38   18.90
 -11  -5  -1  162.28   19.60
  11  -5   1  132.89   16.20
  11  -5   1  138.19   22.20
 -11   5  -1  158.98   13.60
  11   5   1  141.49   14.10
 -11   5  -1  144.89   15.00
  13  -5   1  253.27   33.60
 -13  -5  -1  263.47   25.60
  13  -5   1  296.47   28.10
  13  -5   1  264.17   26.00
 -13   5  -1  329.97   31.50
  13   5   1  302.77   25.20
 -13   5  -1  322.97   24.40
  13   5   1  250.77   31.50
 -15  -5  -1  648.94   53.49
  15  -5   1  645.24   55.99
  15  -5   1  550.34   60.49
  15   5   1  652.73   52.79
 -15   5  -1  685.73   52.19
 -15   5  -1  755.92   59.99
  15   5   1  602.34   59.39
  17  -5   1  840.02   87.99
  17  -5   1 1107.79   84.69
  17   5   1 1000.60   87.79
  17   5   1 1074.99   80.49
  19  -5   1  858.41   71.09
  19   5   1  788.22   65.89
  19   5   1  819.32   74.49
  21  -5   1  453.35   43.30
  21   5   1  411.36   39.60
  21   5   1  486.85   61.39
  23   5   1   95.69   23.90
  23   5   1   79.59   16.10
 -24  -6   1   24.90    8.60
  24  -6  -1   34.40   12.30
  24   6  -1   28.70   17.80
  22  -6  -1   10.10    9.50
 -22  -6   1   -7.80    5.70
 -22   6   1   -5.70    4.60
 -22   6   1    3.30    3.80
  22   6  -1   -7.20   12.90
 -20  -6   1   60.59   10.40
  20  -6  -1   72.49   14.60
 -20   6   1   96.79   11.00
 -20   6   1   68.59    9.70
  20   6  -1   51.59   17.50
  18  -6  -1  268.97   28.00
 -18  -6   1  282.07   25.50
  18   6  -1  199.28   32.80
  18   6  -1  251.87   24.20
 -18   6   1  277.97   23.60
 -16  -6   1  307.27   27.50
  16  -6  -1  310.57   29.70
 -16  -6   1  329.27   26.70
  16   6  -1  234.18   33.90
 -16   6   1  323.37   28.60
  16   6  -1  267.57   26.60
 -16   6   1  291.17   26.10
  14  -6  -1   19.90    7.10
 -14  -6   1   29.50    5.80
 -14  -6   1   24.80    7.40
  14  -6  -1    9.80   11.20
  14   6  -1   14.80   11.60
 -14   6   1   20.60    5.30
 -14   6   1   25.00    7.30
  14   6  -1   16.30    5.40
 -12  -6   1   19.10    4.90
 -12  -6   1   13.20    5.20
  12  -6  -1   19.40   10.70
 -12  -6   1   11.80    9.50
  12  -6  -1   18.10    5.00
  12  -6  -1   15.50    6.10
 -12   6   1   18.20    4.50
 -12   6   1    7.80    7.10
  12   6  -1    0.20   10.20
 -12   6   1    9.80    5.30
 -10  -6   1   75.79   11.30
 -10  -6   1  101.89   11.90
 -10  -6   1  113.09   17.80
  10   6  -1   86.89   23.30
 -10   6   1   94.69   11.30
 -10   6   1   96.99   15.90
  10   6  -1   95.49   11.00
 -10   6   1   86.69   10.40
   8  -6  -1  315.07   28.70
  -8  -6   1  400.86   30.60
  -8  -6   1  324.57   33.20
   8  -6  -1  272.07   34.70
  -8  -6   1  331.27   29.30
  -8   6   1  332.57   28.70
   8   6  -1  384.56   29.40
   8   6  -1  287.57   29.80
   8   6  -1  339.37   34.70
  -8   6   1  386.66   34.00
  -8   6   1  365.26   29.40
   6  -6  -1 2353.36  194.48
   6  -6  -1 2092.79  199.28
  -6  -6   1 2465.25  198.58
  -6  -6   1 2458.85  195.08
  -6  -6   1 2830.12  196.78
   6   6  -1 2349.06  196.38
   6   6  -1 2491.75  194.48
   6   6  -1 2260.37  198.78
  -6   6   1 2826.72  199.28
  -6   6   1 2647.04  195.08
  -6   6   1 2411.96  194.68
   6   6  -1 2829.82  195.28
   4  -6  -1 2406.76  191.98
   4  -6  -1 2231.78  186.68
  -4  -6   1 2329.17  187.38
  -4  -6   1 2109.39  189.98
  -4  -6   1 2631.84  189.48
  -4   6   1 2728.13  190.98
   4   6  -1 2320.07  186.68
  -4   6   1 2480.55  187.18
  -4   6   1 2321.67  187.08
   4   6  -1 2048.59  190.28
   4   6  -1 2516.45  189.38
   4   6  -1 2690.13  187.58
   2  -6  -1 1580.14  134.39
  -2  -6   1 1562.44  135.09
   2  -6  -1 1615.94  138.79
  -2  -6   1 1730.73  134.49
  -2  -6   1 1860.21  137.89
   2   6  -1 1630.04  134.39
   2   6  -1 1893.61  137.79
  -2   6   1 1658.73  134.99
  -2   6   1 1954.40  138.29
  -2   6   1 1678.93  134.89
   2   6  -1 1821.02  135.19
   0  -6  -1  106.79   15.90
   0  -6  -1   93.79   10.10
   0  -6  -1   67.69   12.80
   0  -6   1   94.69   11.60
   0  -6   1   92.39    9.70
   0  -6   1   96.99   14.90
   0  -6   1   64.99   12.40
   0   6   1  125.09   14.00
   0   6  -1  113.19   11.20
   0   6  -1   99.59   10.20
   0   6   1   99.39   11.10
   0   6   1  100.19   10.70
   0   6  -1  121.29   14.40
   2  -6   1  172.48   16.00
  -2  -6  -1  171.08   20.20
  -2  -6  -1  151.98   20.10
   2  -6   1  178.38   21.70
   2   6   1  143.89   20.30
   2   6   1  187.18   17.40
   2   6   1  187.78   16.90
   2   6   1  221.38   19.50
  -2   6  -1  206.78   17.30
  -2   6  -1  219.58   21.00
  -2   6  -1  174.18   16.40
   4  -6   1  120.99   11.90
   4  -6   1  112.69   18.30
  -4  -6  -1  127.99   15.80
  -4  -6  -1  140.49   17.40
   4   6   1  146.79   14.40
   4   6   1   99.29   17.20
   4   6   1  122.79   13.10
  -4   6  -1  145.29   16.80
  -4   6  -1  118.69   12.50
   4   6   1  119.99   12.60
  -4   6  -1  126.59   12.90
   6  -6   1  539.55   48.50
  -6  -6  -1  446.36   42.50
   6  -6   1  473.35   41.70
  -6  -6  -1  588.04   46.80
  -6  -6  -1  556.54   44.10
   6   6   1  512.55   42.30
  -6   6  -1  510.75   42.00
   6   6   1  545.45   42.50
  -6   6  -1  536.15   46.20
   6   6   1  515.85   43.10
  -6   6  -1  503.75   42.10
   6   6   1  483.55   46.60
  -8  -6  -1 1205.58  111.59
  -8  -6  -1 1485.45  112.39
   8  -6   1 1350.16  117.39
  -8  -6  -1 1592.74  115.99
   8  -6   1 1337.37  111.19
   8   6   1 1580.64  111.89
  -8   6  -1 1406.46  111.49
  -8   6  -1 1483.25  111.09
   8   6   1 1310.37  115.79
  10  -6   1   35.70   12.30
 -10  -6  -1   36.30    7.20
  10  -6   1   41.90    8.00
 -10  -6  -1   49.70   13.10
 -10  -6  -1   42.50    6.90
  10   6   1   42.20   13.60
 -10   6  -1   40.20    6.90
  10   6   1   38.00    6.60
 -10   6  -1   36.50    9.00
 -10   6  -1   44.20    6.30
  12  -6   1   22.30    5.80
  12  -6   1   16.60   11.00
 -12  -6  -1   19.90    6.60
  12  -6   1   27.50    7.10
 -12   6  -1   24.30    8.40
 -12   6  -1   26.90    5.10
  12   6   1   31.30   12.00
 -12   6  -1   31.20    7.00
  12   6   1   31.20    5.90
  14  -6   1  525.85   41.10
  14  -6   1  364.56   46.60
 -14  -6  -1  456.35   38.70
  14   6   1  411.06   45.10
  14   6   1  465.05   39.30
  16  -6   1  478.55   42.10
  16  -6   1  392.06   48.00
  16   6   1  493.85   38.60
  16   6   1  422.06   46.40
  18  -6   1  549.35   45.40
  18  -6   1  400.16   50.19
  18   6   1  499.75   40.70
  18   6   1  456.45   49.40
  20  -6   1  540.35   45.10
  20   6   1  451.95   39.10
  20   6   1  369.36   48.00
  22  -6   1  172.38   23.10
  22   6   1  138.89   16.50
  22   6   1  101.59   24.30
  24  -6   1   20.80   12.30
  24   6   1    6.30    9.00
  24   6   1    3.30   14.40
  23  -7  -1   10.50   10.00
 -23  -7   1   13.40    7.80
 -23   7   1   25.50    5.50
  23   7  -1    3.90   13.00
 -23   7   1    8.60    6.10
 -21  -7   1   41.70    9.30
  21  -7  -1   34.20   10.70
 -21   7   1   37.10    7.30
 -21   7   1   33.30    6.80
  21   7  -1   34.60   17.70
  19  -7  -1   15.20   13.30
  19  -7  -1   19.70   10.20
 -19  -7   1   21.00    7.80
 -19   7   1   22.10    6.20
  19   7  -1   -7.30   11.90
 -17  -7   1   13.10    6.60
  17  -7  -1    8.00    7.40
  17  -7  -1   -3.30   11.70
 -17  -7   1    7.30    5.00
 -17   7   1    7.40    7.00
 -17   7   1   14.30    5.80
  17   7  -1    5.70   13.10
 -15  -7   1    4.70    5.70
  15  -7  -1   -9.60   10.10
 -15  -7   1    4.30    4.70
  15  -7  -1    3.80    6.40
  15   7  -1    0.90   11.40
 -15   7   1   -4.00    5.00
 -15   7   1    0.40    4.80
 -13  -7   1   -3.50    5.70
  13  -7  -1   -2.90    9.90
  13  -7  -1    9.70    6.00
 -13  -7   1   10.30    5.20
  13   7  -1    0.10    9.60
 -13   7   1   -6.00    4.20
  13   7  -1   -4.00    4.30
 -13   7   1    5.70    5.30
  11  -7  -1   22.70    6.20
 -11  -7   1   34.30    7.90
  11  -7  -1   13.00   10.90
 -11  -7   1   35.50    7.30
 -11   7   1   34.90    6.70
 -11   7   1   36.40    7.80
  11   7  -1   32.80   13.30
  11   7  -1   42.10    7.50
   9  -7  -1    5.00    8.00
   9  -7  -1   -0.40    3.50
  -9  -7   1   -4.30    7.00
  -9  -7   1    3.70    4.50
  -9   7   1   -0.20    5.70
   9   7  -1    9.60    4.90
   9   7  -1   -3.00    3.10
   9   7  -1   -7.60    6.70
   9   7  -1    3.20    3.60
  -9   7   1   -1.20    3.40
  -9   7   1   -2.30    4.60
  -7  -7   1   55.89   10.60
   7  -7  -1   40.90   19.40
   7  -7  -1   33.80    6.10
  -7  -7   1   35.80    7.20
  -7   7   1   40.60    9.80
   7   7  -1   31.80    7.10
   7   7  -1   45.90    7.20
   7   7  -1   32.30   11.60
  -7   7   1   50.29    7.70
  -7   7   1   36.00    6.20
   7   7  -1   47.80    7.50
  -5  -7   1   24.70    8.40
  -5  -7   1   16.20    5.30
  -5  -7   1   22.30    7.10
   5  -7  -1   22.00    4.30
   5  -7  -1   13.70    8.10
   5   7  -1   22.10    4.90
   5   7  -1   21.20    9.70
   5   7  -1   25.40    6.50
  -5   7   1   16.90    4.80
  -5   7   1   25.70    5.30
   5   7  -1   13.40    4.20
  -5   7   1   19.20    6.80
  -3  -7   1  146.19   17.60
  -3  -7   1  102.99   13.80
   3  -7  -1  133.29   20.30
   3  -7  -1  121.99   12.70
  -3  -7   1  120.59   17.20
  -3   7   1  156.38   17.70
   3   7  -1  132.39   13.60
   3   7  -1  146.89   16.30
  -3   7   1  122.39   13.50
   3   7  -1  131.89   13.00
  -3   7   1  148.89   13.70
   1  -7  -1   -4.10    5.60
   1  -7  -1    1.70    3.10
   1  -7  -1    3.50    5.80
  -1  -7   1    2.90    3.90
  -1  -7   1    3.40    5.60
  -1  -7   1   -2.10    2.40
  -1  -7   1   -4.60    5.80
   1   7  -1   -1.60    2.90
   1   7  -1    2.40    4.00
  -1   7   1    3.90    3.10
   1   7  -1    4.30    3.20
  -1   7   1    3.50    3.80
  -1   7   1    0.40    4.10
   1  -7   1  195.28   21.60
  -1  -7  -1  235.68   25.00
   1  -7   1  246.78   26.70
   1  -7   1  235.58   20.60
  -1  -7  -1  237.28   21.00
  -1  -7  -1  226.48   25.80
   1   7   1  244.08   21.40
  -1   7  -1  277.17   25.60
  -1   7  -1  236.38   21.10
  -1   7  -1  260.97   21.80
   1   7   1  249.18   21.80
  -3  -7  -1   48.50   11.20
   3  -7   1   27.20    8.90
   3  -7   1   34.50    5.40
  -3  -7  -1   34.60    8.70
   3   7   1   30.80   10.50
   3   7   1   29.10    6.90
  -3   7  -1   26.70    7.20
  -3   7  -1   41.80    6.70
   3   7   1   35.90    6.10
   3   7   1   30.60    6.00
  -3   7  -1   32.50    5.80
   5  -7   1  631.14   56.09
   5  -7   1  630.84   62.39
  -5  -7  -1  645.94   60.39
  -5  -7  -1  672.63   59.29
   5   7   1  818.22   58.69
   5   7   1  649.83   61.09
  -5   7  -1  744.23   61.69
   5   7   1  741.83   58.59
  -5   7  -1  717.83   56.79
   5   7   1  724.53   56.89
  -5   7  -1  753.92   56.89
  -7  -7  -1    3.30    5.00
  -7  -7  -1   -3.40    3.70
   7  -7   1    5.60    3.10
   7  -7   1    8.90    8.50
  -7   7  -1    4.30    3.80
   7   7   1    3.40    3.40
   7   7   1    4.20    3.80
   7   7   1   -0.30    7.70
  -7   7  -1    6.00    5.90
   7   7   1   -2.30    3.70
  -7   7  -1    3.30    3.40
  -9  -7  -1  122.39   15.40
  -9  -7  -1  130.49   19.30
   9  -7   1  108.89   14.80
   9  -7   1  115.99   23.30
  -9  -7  -1  109.79   17.50
   9   7   1  106.69   13.40
   9   7   1  123.89   13.60
  -9   7  -1  146.29   13.30
   9   7   1  135.19   13.60
  -9   7  -1  122.89   18.20
   9   7   1  125.79   21.50
  -9   7  -1  122.19   13.90
  11  -7   1   77.69   11.20
  11  -7   1   82.69   18.80
 -11  -7  -1   84.99   12.80
 -11  -7  -1   89.19   13.20
 -11   7  -1   95.19   12.40
  11   7   1  105.39   12.10
 -11   7  -1   96.89   11.40
  11   7   1   91.19   18.30
  13  -7   1  284.07   27.60
 -13  -7  -1  256.47   26.00
  13  -7   1  223.98   35.80
 -13   7  -1  292.27   24.40
  13   7   1  285.57   25.30
  13   7   1  252.47   33.00
 -13   7  -1  286.57   26.10
  15  -7   1  128.39   17.90
 -15   7  -1  132.29   13.70
  15   7   1  118.89   14.90
  15   7   1   85.89   19.20
  17  -7   1   -5.00   10.70
  17  -7   1   12.40    9.10
 -17   7  -1    8.80    4.80
  17   7   1   -2.50   11.70
  19  -7   1   -4.80   12.60
  19  -7   1    8.30    9.00
  19   7   1  -16.40   10.40
 -19   7  -1    5.90    4.70
  21  -7   1    3.00   10.00
  21  -7   1    4.50   12.70
  21   7   1   -4.50   12.90
  23  -7   1    2.00   10.40
  23   7   1  -13.50   12.30
  22  -8  -1   31.30   12.50
 -22  -8   1   24.40    8.80
  22   8  -1   25.30   14.20
 -22   8   1   28.60    8.00
 -20  -8   1  143.39   18.30
  20  -8  -1  191.18   22.00
 -20   8   1  138.39   20.10
  20   8  -1   83.69   22.10
 -18  -8   1  353.56   38.20
  18  -8  -1  464.65   41.30
 -18   8   1  490.95   42.80
  18   8  -1  364.16   46.70
 -18   8   1  487.45   40.00
  16  -8  -1  291.27   28.30
 -16  -8   1  249.38   26.60
 -16  -8   1  284.67   26.20
 -16   8   1  268.97   26.80
 -16   8   1  288.17   26.00
  16   8  -1  205.88   34.00
  14  -8  -1  355.26   47.60
 -14  -8   1  482.45   38.10
 -14  -8   1  393.86   37.50
  14  -8  -1  482.55   39.10
 -14   8   1  422.56   37.60
  14   8  -1  329.67   44.20
 -14   8   1  428.06   36.90
 -12  -8   1   49.30    9.40
 -12  -8   1   50.29    9.40
 -12   8   1   49.30    8.70
 -12   8   1   44.00    8.60
  12   8  -1   16.30   13.40
 -10  -8   1   14.00    6.60
 -10  -8   1   15.20    6.80
  10  -8  -1   17.60    6.20
  10  -8  -1   -0.10    9.60
  10   8  -1   11.40    5.30
  10   8  -1   15.80    5.20
 -10   8   1   26.30    7.70
  10   8  -1   10.50   11.00
 -10   8   1   22.20    6.30
   8  -8  -1  757.72   62.09
  -8  -8   1  857.41   65.49
   8  -8  -1  666.03   70.19
  -8  -8   1  744.93   63.19
  -8  -8   1  752.22   67.69
  -8   8   1  818.92   63.09
   8   8  -1  695.23   68.59
   8   8  -1  697.33   64.39
   8   8  -1  808.32   62.39
   8   8  -1  854.21   63.29
  -8   8   1  771.62   62.79
  -6  -8   1  773.82   62.39
   6  -8  -1  658.13   58.39
  -6  -8   1  671.33   59.49
   6  -8  -1  613.74   65.59
  -6  -8   1  693.23   63.69
   6   8  -1  785.52   59.59
  -6   8   1  799.72   64.19
  -6   8   1  768.62   59.29
   6   8  -1  748.63   58.69
   6   8  -1  739.83   61.79
   6   8  -1  682.53   66.89
  -6   8   1  734.43   59.29
  -4  -8   1  538.05   48.80
   4  -8  -1  567.04   47.70
  -4  -8   1  572.24   55.39
  -4  -8   1  616.54   52.29
  -4   8   1  605.94   52.59
   4   8  -1  582.44   51.29
   4   8  -1  629.84   48.80
   4   8  -1  599.84   48.10
  -4   8   1  579.74   48.40
  -4   8   1  575.44   48.40
  -2  -8   1  332.37   31.80
   2  -8  -1  269.57   29.80
   2  -8  -1  285.17   33.20
  -2  -8   1  275.67   31.20
  -2  -8   1  327.27   26.60
  -2  -8   1  306.37   33.20
   2  -8  -1  300.37   26.40
  -2   8   1  292.27   27.10
   2   8  -1  330.27   30.70
   2   8  -1  333.17   27.50
  -2   8   1  319.07   27.30
   2   8  -1  316.07   26.80
   0  -8   1   10.70    6.60
   0  -8  -1    1.50    6.00
   0  -8   1    2.40    6.20
   0  -8  -1    1.80    6.40
   0  -8  -1    5.40    3.10
   0  -8   1    2.30    3.00
   0   8  -1    2.20    5.40
   0   8  -1    2.10    3.20
   0   8   1    3.60    3.20
   0   8   1   -0.20    3.60
   0   8   1   10.30    5.40
   0   8  -1    1.10    3.60
  -2  -8  -1    1.30    6.20
  -2  -8  -1   13.10    7.10
   2  -8   1    3.70    3.00
   2  -8   1   -1.80    7.50
  -2   8  -1    4.50    3.90
  -2   8  -1    2.90    4.90
   2   8   1    1.40    4.10
   2   8   1    3.80    4.00
  -2   8  -1   -2.20    3.40
   2   8   1   -1.80    3.40
  -4  -8  -1  987.10   85.39
   4  -8   1  992.20   88.09
   4  -8   1  967.60   80.99
  -4  -8  -1  969.40   85.89
  -4   8  -1 1129.99   86.79
   4   8   1  868.21   85.79
   4   8   1 1179.28   84.69
  -4   8  -1 1033.40   81.79
   4   8   1 1063.59   81.99
   6  -8   1 1253.77  113.79
   6  -8   1 1254.17  106.29
  -6  -8  -1 1290.57  109.89
  -6  -8  -1 1309.97  111.29
  -6   8  -1 1471.55  108.39
  -6   8  -1 1441.26  112.69
   6   8   1 1351.26  108.79
   6   8   1 1387.26  108.49
  -6   8  -1 1367.26  107.09
   6   8   1 1393.86  107.49
   8  -8   1 1175.08  109.29
  -8  -8  -1 1199.08  103.69
   8  -8   1 1207.58  100.99
  -8  -8  -1 1421.76  107.19
  -8   8  -1 1392.16  101.79
   8   8   1 1164.28  102.59
   8   8   1 1116.69  106.69
   8   8   1 1303.07  101.69
   8   8   1 1410.96  102.29
  -8   8  -1 1419.46  103.69
  10  -8   1  261.97   38.60
  10  -8   1  318.27   28.60
 -10  -8  -1  344.77   31.40
 -10   8  -1  359.66   29.80
  10   8   1  343.47   29.20
  10   8   1  330.57   37.20
 -10   8  -1  383.56   29.00
  10   8   1  261.47   29.10
 -12  -8  -1  155.98   18.60
  12  -8   1  103.19   23.10
 -12   8  -1  183.88   17.50
  12   8   1  149.99   16.90
 -12   8  -1  167.78   16.10
  12   8   1  116.09   24.10
  14  -8   1    2.70   12.10
  14  -8   1    3.60    7.60
 -14   8  -1   -3.90    4.70
 -14   8  -1    5.30    5.80
  14   8   1    0.30   10.90
  16  -8   1   60.59   12.10
  16  -8   1   19.80   15.40
  16   8   1   46.40   16.10
 -16   8  -1   56.09    8.00
  18  -8   1   68.89   14.00
  18  -8   1   54.49   19.30
 -18   8  -1   78.89   11.30
  18   8   1   58.59   18.90
  20  -8   1   68.49   21.10
  20  -8   1  111.29   23.20
 -20   8  -1  108.29   12.80
  20   8   1  105.39   23.30
  22  -8   1    5.90   10.50
  22   8   1   11.40   13.70
  21  -9  -1   91.29   18.50
  21   9  -1   63.39   22.00
 -21   9   1   63.69   11.20
 -19  -9   1  209.28   25.20
  19  -9  -1  264.17   27.50
  19   9  -1  182.58   35.00
 -19   9   1  245.88   23.50
  17  -9  -1  324.57   49.40
 -17  -9   1  449.36   38.90
  17  -9  -1  436.66   40.90
 -17  -9   1  397.16   38.90
 -17   9   1  473.75   37.90
  17   9  -1  364.56   47.50
 -17   9   1  527.75   40.60
  15  -9  -1  443.46   39.40
 -15  -9   1  481.45   38.70
  15  -9  -1  310.27   48.30
 -15  -9   1  370.26   37.40
 -15   9   1  451.15   38.10
 -15   9   1  428.36   36.50
  15   9  -1  365.46   45.90
 -13  -9   1  110.79   15.70
 -13  -9   1  116.79   17.00
  13   9  -1  114.09   13.90
 -13   9   1  123.19   14.10
  13   9  -1   62.59   17.50
 -13   9   1  107.49   15.20
  11  -9  -1    1.30   11.70
 -11  -9   1    3.90    5.80
 -11  -9   1   13.50    7.30
 -11   9   1   13.60    7.10
 -11   9   1   15.00    5.80
  11   9  -1    6.70   12.90
  11   9  -1   11.40    5.30
  -9  -9   1  383.46   35.10
  -9  -9   1  349.17   32.50
   9   9  -1  304.47   33.20
   9   9  -1  366.56   31.30
  -9   9   1  386.96   31.70
  -9   9   1  360.86   32.20
   9   9  -1  320.27   39.40
  -7  -9   1  663.73   51.49
   7  -9  -1  462.05   55.09
  -7  -9   1  538.75   47.60
   7  -9  -1  505.15   46.00
   7   9  -1  483.95   53.29
   7   9  -1  592.44   46.60
  -7   9   1  592.54   47.10
   7   9  -1  530.45   49.50
  -7   9   1  630.74   47.70
   5  -9  -1  862.21   70.79
  -5  -9   1  786.82   71.79
  -5  -9   1  974.10   76.09
   5  -9  -1  784.22   78.89
  -5  -9   1  802.12   75.99
  -5   9   1  905.41   71.69
   5   9  -1  940.01   71.29
  -5   9   1  949.80   71.89
   5   9  -1  912.41   77.89
  -3  -9   1 1157.48   92.09
  -3  -9   1  867.11   90.09
   3  -9  -1  984.20   85.69
  -3  -9   1  960.60   86.89
   3  -9  -1  944.31   92.99
   3   9  -1 1152.48   90.59
  -3   9   1 1254.97   93.29
   3   9  -1 1118.19   86.29
  -3   9   1 1247.18   91.79
  -3   9   1 1154.88   87.79
   1  -9  -1  206.98   28.20
  -1  -9   1  221.58   20.90
   1  -9  -1  210.78   29.60
   1  -9  -1  219.78   21.10
  -1  -9   1  206.38   26.20
  -1  -9   1  237.18   28.50
  -1   9   1  267.57   26.40
   1   9  -1  251.47   26.10
   1   9  -1  237.98   21.60
  -1  -9  -1   11.90    9.40
  -1  -9  -1   11.60    5.00
   1  -9   1   15.30    5.30
   1  -9   1    1.10    7.30
   1  -9   1   19.20   10.20
  -1   9  -1   16.80    5.20
  -1   9  -1   19.60    8.30
  -1   9  -1   16.60    5.60
   1   9   1   15.10    7.20
   3  -9   1  556.24   49.20
   3  -9   1  580.74   56.99
  -3  -9  -1  546.55   54.89
  -3  -9  -1  539.45   53.99
  -3   9  -1  629.24   49.99
  -3   9  -1  662.43   50.49
   3   9   1  639.04   50.29
   3   9   1  666.93   53.49
  -5  -9  -1  816.62   74.89
   5  -9   1  770.92   69.39
  -5  -9  -1  862.31   74.89
   5  -9   1  866.11   78.59
  -5   9  -1  980.00   70.79
  -5   9  -1  952.40   70.79
   5   9   1  724.93   75.29
   5   9   1  888.11   70.59
   5   9   1  941.81   73.29
   7  -9   1  766.02   76.79
   7  -9   1  808.82   67.79
  -7  -9  -1  855.31   72.49
   7   9   1  747.53   74.29
   7   9   1  821.12   70.39
  -7   9  -1  941.21   68.69
  -7   9  -1  915.91   68.99
   7   9   1  862.31   68.69
   9  -9   1  682.23   70.39
  -9  -9  -1  748.63   64.09
   9   9   1  668.33   61.99
  -9   9  -1  835.82   60.89
  -9   9  -1  779.92   61.29
   9   9   1  774.52   61.09
   9   9   1  675.43   67.59
 -11  -9  -1   97.29   17.70
 -11   9  -1  117.79   14.30
 -11   9  -1  102.89   13.40
  11   9   1  118.89   14.30
  11   9   1   83.39   19.70
 -13  -9  -1    1.30    7.40
  13  -9   1   -8.60   11.00
 -13   9  -1    5.20    7.00
 -13   9  -1   -2.30    5.00
  13   9   1    6.40   12.10
  13   9   1    9.70    6.40
  15  -9   1   51.09   18.80
  15  -9   1   70.49   14.00
  15   9   1   61.89   12.00
 -15   9  -1   89.99   13.80
  15   9   1   65.69   18.60
 -15   9  -1   72.39   10.10
  17  -9   1  445.86   40.00
  17  -9   1  332.17   49.30
  17   9   1  367.56   46.70
 -17   9  -1  439.86   36.00
  19  -9   1  211.88   26.80
 -19   9  -1  166.98   22.70
  19   9   1  219.98   32.70
  21  -9   1   49.00   20.00
  21  -9   1   84.29   16.60
  21   9   1   60.09   20.40
 -21   9  -1   45.50   13.80
  20 -10  -1   17.50   12.20
  20 -10  -1   -8.40   14.80
  20  10  -1   -1.30   14.50
  18 -10  -1    5.30   14.50
 -18 -10   1   24.00    9.00
  18 -10  -1   25.20    9.80
  18  10  -1   30.90   15.60
 -18  10   1   27.40   11.30
  18  10  -1   10.40   14.30
 -16 -10   1   68.19   12.50
  16 -10  -1   60.29   33.30
  16 -10  -1   80.19   13.80
 -16 -10   1   56.79   11.90
  16  10  -1   72.19   12.00
 -16  10   1   88.59   13.20
  16  10  -1   46.70   19.50
  14 -10  -1  126.89   28.30
 -14 -10   1  147.69   19.90
 -14 -10   1  160.58   22.30
 -14  10   1  191.58   20.10
  14  10  -1  157.28   28.60
  14  10  -1  186.28   18.90
  12 -10  -1   -3.50   11.40
 -12 -10   1    2.60    8.10
 -12 -10   1   -3.90    6.50
 -12  10   1    0.50    6.20
  12  10  -1   -8.20   10.00
  12  10  -1   10.80    6.10
  10 -10  -1   15.30   13.80
 -10 -10   1   26.80   10.20
 -10 -10   1   22.40    8.30
  10  10  -1   37.50    7.20
  10  10  -1   38.70   14.70
 -10  10   1   32.60    8.40
  10  10  -1   20.80    8.20
   8 -10  -1   -5.30   11.10
  -8 -10   1    0.40    6.40
  -8 -10   1    4.20    8.20
  -8  10   1    9.90    6.70
   8  10  -1    0.90    5.20
   8  10  -1    2.40    5.00
   6 -10  -1   48.70   16.40
  -6 -10   1   59.39   10.90
  -6 -10   1   90.69   16.50
   6  10  -1   91.19   11.70
  -6  10   1   90.19   12.70
   6  10  -1   92.89   15.50
   4 -10  -1  103.29   16.90
   4 -10  -1   77.59   18.30
  -4 -10   1   82.59   16.50
   4  10  -1   95.89   17.00
   4  10  -1  108.89   13.10
  -4  10   1  109.09   13.80
   2 -10  -1   78.59   16.40
   2 -10  -1   62.29   10.10
  -2 -10   1   63.59   14.70
   2 -10  -1   46.00   15.50
  -2  10   1   64.99   11.00
   2  10  -1   75.99   10.80
   0 -10  -1   42.80   11.70
   0 -10  -1   46.30    7.90
   0 -10   1   41.00    7.40
   0 -10   1   37.00   12.00
   0 -10  -1   38.00   13.20
   0  10   1   47.50   13.00
   0  10  -1   53.59   12.50
   0  10   1   58.99    9.60
   2 -10   1    7.30    9.40
   2 -10   1   14.30    5.10
  -2 -10  -1   18.20    9.20
  -2 -10  -1    6.50    9.50
   2  10   1    8.00    6.40
   2  10   1   11.50    5.90
  -2  10  -1   13.80    6.20
   4 -10   1   37.20    7.50
  -4 -10  -1   57.99   26.10
   4 -10   1   44.30   14.70
  -4  10  -1   46.00    9.60
   4  10   1   46.30   10.00
   4  10   1   63.99    9.40
   6 -10   1  113.29   14.00
  -6 -10  -1  134.59   21.80
  -6  10  -1  132.69   15.70
   6  10   1  141.19   15.60
  -8 -10  -1  130.69   21.70
   8  10   1  140.19   25.30
   8  10   1  124.39   17.30
   8  10   1  138.89   15.90
  -8  10  -1  145.79   16.60
  10 -10   1   -5.90   11.10
 -10 -10  -1   -0.10    8.00
  10  10   1  -11.10    8.80
  10  10   1    0.80    4.70
 -10  10  -1    1.60    6.60
  10  10   1    0.60    5.00
  12 -10   1   -2.00   11.50
 -12 -10  -1    2.10    8.70
  12  10   1   11.10    6.80
  12  10   1   -1.80   11.60
 -12  10  -1   28.30    8.40
 -14 -10  -1  104.09   19.40
  14  10   1  113.69   23.10
 -14  10  -1  161.38   18.00
  14  10   1  145.19   17.20
  16 -10   1   86.69   16.30
  16  10   1   67.39   15.10
 -16  10  -1  106.79   15.70
  16  10   1   66.49   29.10
  18 -10   1   39.10   12.40
  18 -10   1   21.00   16.30
  18  10   1   40.00   15.40
 -18  10  -1   24.60   10.00
  18  10   1   27.40    8.70
  19 -11  -1   30.30   19.50
  19 -11  -1   70.99   15.50
  19  11  -1   55.89   19.10
 -19  11   1   77.29   14.40
  19  11  -1   90.69   14.20
  17 -11  -1   26.40   11.20
  17 -11  -1   -6.70   13.70
 -17 -11   1   12.70    9.30
 -17  11   1   20.50   10.30
  17  11  -1   19.30   13.80
  17  11  -1   26.90    9.50
 -15 -11   1   81.59   14.70
  15 -11  -1   46.70   18.70
  15  11  -1   96.69   24.10
  15  11  -1  106.79   14.80
 -15  11   1  103.69   15.90
  13 -11  -1  -11.80   15.60
 -13 -11   1   -5.00    8.00
  13  11  -1    8.30    6.80
  13  11  -1   -5.20   11.20
 -13  11   1    5.30    7.80
 -11 -11   1   -5.50    7.80
  11 -11  -1   -2.40   13.10
 -11 -11   1   -3.50    6.00
  11  11  -1    3.10    5.80
 -11  11   1    4.50    6.60
  11  11  -1    0.80    5.30
  11  11  -1   -9.40   11.40
   9 -11  -1   -0.20   11.20
  -9 -11   1    6.90    9.40
   9  11  -1   24.50    7.20
  -9  11   1   17.50    7.50
   9  11  -1   18.30    7.60
  -7 -11   1  233.08   29.80
   7 -11  -1  180.58   34.80
   7  11  -1  264.07   23.70
  -7  11   1  258.67   24.70
  -5 -11   1  139.29   24.80
   5  11  -1  171.28   17.70
  -5  11   1  150.88   18.30
  -3 -11   1    3.40    9.40
   3 -11  -1  -15.70   10.20
  -3  11   1    3.30    6.10
   3  11  -1   11.00    6.30
   1 -11  -1  199.08   33.00
  -1 -11   1  186.48   30.60
   1  11  -1  252.87   22.80
  -1  11   1  244.18   23.00
  -1 -11  -1   35.20   14.10
   1 -11   1   16.60   12.40
  -1  11  -1   46.60    9.00
   1  11   1   45.90    8.80
  -3 -11  -1   48.80   15.70
   3 -11   1   37.50   14.10
  -3  11  -1   58.59   10.10
   3  11   1   93.49   12.20
  -5 -11  -1   93.49   19.60
   5  11   1  153.38   16.10
  -5  11  -1  132.69   16.10
   5  11   1  133.29   18.70
  -7 -11  -1  170.98   27.60
   7 -11   1  155.88   32.40
   7  11   1  232.28   21.30
  -7  11  -1  188.18   21.20
   7  11   1  225.18   24.40
  -9 -11  -1  212.98   29.80
   9 -11   1  172.88   35.60
  -9  11  -1  294.87   25.20
   9  11   1  225.68   27.90
   9  11   1  287.17   24.80
   9  11   1  233.68   32.20
 -11 -11  -1   44.50   13.10
  11 -11   1   44.70   18.50
  11  11   1   51.09   18.90
  11  11   1   68.09   11.90
  11  11   1   38.40    9.10
 -11  11  -1   72.39   12.00
 -13 -11  -1   64.19   14.50
  13 -11   1   42.70   17.90
  13  11   1   91.29   22.40
  13  11   1   87.69   12.20
 -13  11  -1   89.79   13.10
  15 -11   1    9.40   15.60
  15  11   1   16.10   13.60
  15  11   1   19.40    8.40
 -15  11  -1   16.60    8.60
  17 -11   1  -15.00   12.90
  17 -11   1   -0.80    9.10
  17  11   1    1.70    7.50
 -17  11  -1   -3.80    7.90
  17  11   1    1.20   11.40
 -16 -12   1  143.39   25.40
  16 -12  -1  199.28   24.60
  16  12  -1  204.08   22.00
 -16  12   1  200.48   23.40
  16  12  -1  129.69   27.30
 -14 -12   1  247.08   32.30
  14  12  -1  247.28   38.30
 -14  12   1  344.07   34.30
  14  12  -1  296.37   28.20
  12 -12  -1  -17.00   12.70
 -12 -12   1   -1.10    9.20
  12  12  -1   12.00    7.50
 -12  12   1    0.30    7.70
  12  12  -1    0.50   16.30
  10 -12  -1  -12.70   15.20
 -10 -12   1   -3.30    9.30
 -10  12   1   -1.90    6.70
  10  12  -1    7.80    6.00
  -8 -12   1  410.76   44.40
   8  12  -1  427.76   38.00
  -8  12   1  446.86   39.50
  -6 -12   1  517.95   53.69
   6  12  -1  588.24   47.30
  -6  12   1  534.65   47.80
  -4 -12   1  552.54   56.59
   4 -12  -1  453.95   59.09
  -4  12   1  644.64   50.29
   4  12  -1  635.94   49.60
  -2 -12   1   -7.20    9.10
   2 -12  -1    3.20   12.60
   2  12  -1   15.10    6.80
  -2  12   1   13.80    7.10
   0 -12   1    2.40   11.20
   0 -12  -1   -4.90   11.00
   0  12   1    5.90    7.30
   0  12  -1   -2.10    5.40
  -2 -12  -1    6.70   12.50
   2 -12   1    9.50   12.20
   2  12   1   39.90    9.10
  -2  12  -1   40.20    8.80
  -4 -12  -1  511.35   57.69
   4 -12   1  556.64   61.39
   4  12   1  663.13   51.39
  -4  12  -1  636.74   51.09
   6 -12   1  339.17   47.10
  -6 -12  -1  369.56   43.50
   6  12   1  426.06   36.40
  -6  12  -1  440.86   36.70
  -8 -12  -1  484.25   53.69
  -8  12  -1  585.24   48.60
   8  12   1  602.14   48.40
  10 -12   1  219.98   40.30
 -10 -12  -1  249.68   33.70
 -10  12  -1  337.37   28.60
  10  12   1  320.07   28.10
  10  12   1  283.37   37.10
  10  12   1  250.37   29.30
  12 -12   1   63.49   22.90
 -12 -12  -1   69.79   16.30
 -12  12  -1  119.89   16.30
  12  12   1  104.49   24.20
 -14 -12  -1   -0.70   10.60
  14  12   1    3.80    7.70
 -14  12  -1   -0.30    7.70
  14  12   1    6.20   14.10
  16 -12   1  -12.60   14.30
 -13 -13   1  162.48   29.10
  13  13  -1  205.98   30.60
 -13  13   1  231.28   24.80
 -11 -13   1  -13.40    9.50
  11 -13  -1  -13.00   14.60
 -11  13   1    9.00    8.40
  11  13  -1   -1.60    6.80
  -9 -13   1    8.80   12.10
   9 -13  -1    6.20   15.40
   9  13  -1   24.20    8.40
  -9  13   1   32.30    9.30
  -7 -13   1   62.69   15.90
   7 -13  -1   46.60   22.30
  -7  13   1   73.39   13.70
   7  13  -1   66.59   11.90
  -5 -13   1  372.16   44.70
  -5  13   1  418.86   37.40
   5  13  -1  405.06   36.50
  -3 -13   1   15.10   11.90
   3 -13  -1   16.10   15.20
  -3  13   1   28.80    9.30
   3  13  -1   35.20    9.30
  -1 -13   1    3.60   11.00
   1 -13  -1  -10.60   11.40
   1  13  -1   -3.60    5.90
  -1  13   1    4.10    7.10
   1 -13   1   80.99   20.90
  -1 -13  -1   92.79   21.50
   1  13   1  147.79   17.50
  -1  13  -1  134.89   16.30
   3 -13   1   13.90   13.20
  -3 -13  -1   12.60   13.10
   3  13   1   13.00    8.80
  -3  13  -1   18.80    8.50
  -5 -13  -1  386.76   48.20
   5  13   1  474.25   40.40
  -5  13  -1  460.75   40.30
  -7 -13  -1  221.48   35.40
  -7  13  -1  308.87   28.60
   7  13   1  279.97   27.60
   9 -13   1   93.39   25.10
  -9 -13  -1   92.19   19.50
  11 -13   1   75.69   24.30
 -11 -13  -1   77.79   18.60
 -13 -13  -1  -15.90   11.50
  13 -13   1  -15.50   15.30
 -13  13  -1   -2.50    7.40
  13  13   1    5.90   13.40
  13  13   1   -8.10    7.10
  10 -14  -1  -16.60   14.00
 -10 -14   1    1.80   12.10
 -10  14   1   11.50   10.00
  -8 -14   1    0.80   11.20
   8 -14  -1    1.30   15.20
  -8  14   1   28.50   15.60
   8  14  -1   20.00    9.70
  -6 -14   1   -1.60   12.00
   6 -14  -1   -7.00   13.60
  -6  14   1   -1.10    7.60
   6  14  -1   -0.80    7.50
   4 -14  -1   -5.70   13.80
  -4 -14   1  -13.50   11.10
  -4  14   1  -13.30    6.20
   4  14  -1    1.50    7.70
  -2 -14   1   -0.50   12.60
   2 -14  -1  -16.40   20.60
  -2  14   1    6.70    8.40
   2  14  -1    1.90    7.70
   0 -14  -1   11.40   14.10
   0 -14   1   18.10   21.60
   0  14   1   53.69   11.10
   0  14  -1   31.10    9.40
  -2 -14  -1   68.79   21.30
   2 -14   1   43.10   17.40
   2  14   1   85.19   13.60
  -2  14  -1   96.19   13.80
   4 -14   1  -13.10   13.20
  -4 -14  -1  -21.60   12.10
   4  14   1   -5.80    7.00
  -4  14  -1   -0.40    6.80
   6 -14   1   -9.50   13.60
  -6 -14  -1   -1.90   12.70
   6  14   1   14.60   14.20
  -6  14  -1    4.40    8.40
  -8 -14  -1  -13.60   11.60
   8 -14   1  -19.10   13.90
   8  14   1   -0.10    7.70
  -8  14  -1    1.00    7.70
  10 -14   1  -21.20   13.80
  -5 -15   1   95.59   34.00
   5 -15  -1   65.69   23.10
   3 -15  -1   21.10   18.60
  -3 -15   1   37.80   18.10
  -3  15   1   59.19   12.10
   3  15  -1   69.49   12.70
   1 -15  -1   54.09   19.30
  -1 -15   1   75.19   22.40
  -1  15   1   99.49   15.50
   1  15  -1  123.29   17.00
  -1 -15  -1   26.80   18.10
   1 -15   1    6.60   17.10
   1  15   1   34.90   10.70
  -1  15  -1   42.60   10.90
   3 -15   1  -12.90   13.90
  -3 -15  -1  -48.50   25.70
  -3  15  -1    0.30    9.50
   3  15   1    3.90    8.40
 -26   0   2  307.27   36.30
  26   0  -2  263.47   36.40
 -24   0   2 1040.30   86.99
  24   0  -2  942.91   86.89
 -24   0   2  978.80   77.99
 -22   0   2 1034.80   89.99
 -22   0   2 1041.40   79.39
  22   0  -2  931.71   86.89
 -20   0   2 1722.33  134.19
  20   0  -2 1652.13  140.49
 -20   0   2 1789.02  141.39
  18   0  -2  963.40   79.09
 -18   0   2  846.82   78.99
 -18   0   2  969.30   72.99
  16   0  -2  695.53   56.89
 -16   0   2  664.83   51.59
 -16   0   2  704.13   55.79
  16   0  -2  559.94   52.79
 -16   0   2  637.44   57.39
  14   0  -2    0.10    5.30
 -14   0   2    2.40    2.30
  14   0  -2    2.80    3.30
 -14   0   2   -0.10    5.00
 -14   0   2    1.50    6.20
 -12   0   2  889.11   63.09
  12   0  -2  740.63   60.99
  12   0  -2  814.92   63.39
 -12   0   2  747.83   60.19
 -12   0   2  647.04   63.69
 -10   0   2  810.22   57.89
  10   0  -2  775.62   58.09
 -10   0   2  679.33   55.69
  10   0  -2  709.63   56.19
  10   0  -2  588.34   55.59
   8   0  -2  810.82   71.39
  -8   0   2  891.21   71.39
   8   0  -2 1014.40   73.19
   8   0  -2  948.41   71.69
  -6   0   2  130.49   11.90
   6   0  -2  152.18   12.10
   6   0  -2  169.08   13.60
   6   0  -2  121.39   11.90
  -4   0   2 7035.00  474.65
   4   0  -2 5393.76  474.05
   4   0  -2 6360.96  473.95
   4   0  -2 6519.25  474.75
  -4   0   2 5477.85  474.15
   2   0  -2 1392.56  117.39
  -2   0   2 1663.53  117.59
   2   0  -2 1442.86  117.09
  -2   0   2 1576.74  117.79
  -2   0  -2 7463.45  574.74
   4   0   2 2019.50  146.79
  -4   0  -2 1929.91  146.69
   4   0   2 1764.62  146.99
  -4   0  -2 1847.12  147.09
   6   0   2 1473.35  116.09
  -6   0  -2 1477.85  115.29
  -6   0  -2 1584.24  116.19
   6   0   2 1384.96  115.69
  -8   0  -2  680.03   53.29
  -8   0  -2  694.63   54.29
   8   0   2  615.94   54.09
 -10   0  -2   27.30    5.80
  10   0   2   24.70    6.30
  10   0   2   16.60    4.90
  12   0   2  240.48   24.10
  14   0   2  192.78   23.20
 -14   0  -2  234.38   21.60
 -14   0  -2  217.08   22.70
 -16   0  -2  384.46   34.40
  16   0   2  381.16   37.10
  18   0   2   60.09   13.00
 -18   0  -2   56.19   10.10
  20   0   2  364.86   39.40
 -20   0  -2  381.76   35.00
 -22   0  -2  212.18   24.10
  22   0   2  248.58   35.90
  24   0   2  210.88   30.60
 -24   0  -2  194.98   23.30
  27  -1  -2  146.09   27.80
 -27  -1   2  170.48   29.40
  27   1  -2  191.78   31.00
  25  -1  -2   24.00   26.10
 -25  -1   2   27.20   22.10
 -25  -1   2   31.80    6.40
  25   1  -2   18.20   13.70
 -23  -1   2 1354.46  107.19
  23  -1  -2 1206.28  107.29
 -23  -1   2 1256.97   99.89
 -23   1   2 1392.16  109.09
  23   1  -2 1141.59  107.69
 -23   1   2 1249.57   99.19
 -21  -1   2  637.74   50.59
  21  -1  -2  627.64   57.99
 -21  -1   2  624.04   57.79
 -21   1   2  623.24   50.09
 -21   1   2  676.43   59.49
  21   1  -2  574.04   57.99
 -19  -1   2  790.62   70.99
  19  -1  -2  787.92   70.19
 -19  -1   2  850.41   64.59
 -19   1   2  818.12   64.29
 -19   1   2  866.71   72.69
  19   1  -2  744.13   70.79
 -17  -1   2  522.75   51.69
  17  -1  -2  590.94   51.39
 -17  -1   2  601.24   46.20
  17   1  -2  471.75   46.40
  17   1  -2  598.64   52.29
 -17   1   2  618.54   53.59
 -17   1   2  577.44   46.00
 -17   1   2  664.03   50.59
 -15  -1   2   21.70    7.10
 -15  -1   2   23.80    3.90
  15  -1  -2   18.70    5.10
 -15  -1   2   15.10    7.40
  15  -1  -2   18.10    8.40
 -15   1   2   19.40    3.70
 -15   1   2   20.20    8.40
  15   1  -2    7.90    3.50
  15   1  -2   22.30    9.20
  13  -1  -2   25.60    5.40
 -13  -1   2   22.20    3.80
  13  -1  -2   16.60    7.10
 -13  -1   2   32.40    8.00
 -13   1   2   19.80    8.20
 -13   1   2   14.20    3.60
  13   1  -2   18.40    8.20
  13   1  -2   22.40    4.20
 -13   1   2   22.80    5.90
 -11  -1   2   74.89    8.20
  11  -1  -2   82.69    9.30
 -11  -1   2   94.29   11.90
  11  -1  -2   86.79   11.70
  11   1  -2   87.49   12.70
  11   1  -2   78.39    8.50
 -11   1   2   68.79    8.30
 -11   1   2   90.69   14.60
 -11   1   2   95.99   10.80
   9  -1  -2    5.00    3.40
  -9  -1   2   11.40    4.80
   9  -1  -2    5.50    2.70
  -9  -1   2    7.50    2.10
   9   1  -2    8.90    4.80
   9   1  -2    9.20    2.40
  -9   1   2   10.30    3.60
  -9   1   2    6.10    2.30
  -9   1   2    6.40    4.90
  -7  -1   2  111.59   11.70
   7  -1  -2   87.99    9.30
  -7  -1   2   92.39    8.10
   7  -1  -2   89.89    8.40
  -7   1   2   65.19   12.00
  -7   1   2   89.39    8.40
   7   1  -2   83.59   10.70
   7   1  -2   82.09    8.00
  -7   1   2   66.89    7.90
  -7   1   2   96.49    9.00
   5  -1  -2  121.09   10.10
  -5  -1   2  103.39    9.10
  -5  -1   2  108.09   11.00
   5  -1  -2   96.99    9.10
  -5   1   2  109.29    9.30
   5   1  -2   99.79   11.20
  -5   1   2   99.39    9.10
   5   1  -2   98.69    9.10
  -3  -1   2 1948.80  163.28
   3  -1  -2 2056.79  162.28
   3  -1  -2 2385.86  162.08
  -3   1   2 2248.08  161.98
   3   1  -2 2105.59  162.38
   3   1  -2 1841.52  163.88
  -1  -1   2 1079.09   91.59
  -1  -1   2 1212.68   90.89
   1  -1  -2 1284.47   90.89
  -1   1   2 1253.37   90.89
   1   1  -2 1220.78   90.89
   1   1  -2  992.60   91.49
   1  -1   2 4584.14  338.27
  -1   1  -2 4277.07  338.17
  -1   1  -2 4276.67  337.17
   5  -1   2 4794.52  398.56
  -5  -1  -2 5564.84  399.06
   5  -1   2 5082.99  399.06
   5   1   2 5037.40  397.26
   5   1   2 5157.68  398.96
  -5   1  -2 5325.17  398.96
   7  -1   2 1496.65  125.59
   7  -1   2 1553.64  125.29
  -7  -1  -2 1762.42  125.79
   7   1   2 1544.75  125.59
   7   1   2 1510.95  123.19
  -7   1  -2 1712.73  125.59
   9  -1   2   65.69   11.80
  -9  -1  -2   78.99    8.20
  -9  -1  -2   81.09   10.70
   9  -1   2   60.99    9.90
  -9   1  -2   73.69   10.50
   9   1   2   65.19    6.50
   9   1   2   81.59   11.40
 -11  -1  -2  327.57   29.60
  11  -1   2  286.77   29.20
 -11  -1  -2  366.26   27.40
  11   1   2  286.77   25.70
 -11   1  -2  371.56   29.50
  11   1   2  294.87   29.70
  13  -1   2  209.48   21.40
 -13  -1  -2  247.28   21.20
 -13  -1  -2  271.47   24.30
  13  -1   2  207.68   25.30
  13   1   2  239.18   25.30
 -13   1  -2  234.58   23.20
 -15  -1  -2   47.80    8.70
  15  -1   2   32.20    9.80
  15   1   2   28.60   10.00
 -15   1  -2   42.10    8.70
 -17  -1  -2   47.50    8.60
  17  -1   2   49.10   12.60
 -17   1  -2   55.69   10.40
  17   1   2   53.69   14.10
  19  -1   2   16.20    9.30
 -19  -1  -2   20.80    6.30
  19   1   2   13.80   12.20
 -19   1  -2   20.60    8.00
 -21  -1  -2  143.09   16.60
  21  -1   2  152.08   23.20
 -21   1  -2  132.79   20.00
  21   1   2  112.49   21.80
  23  -1   2  225.18   31.00
  23   1   2  255.87   32.50
  25  -1   2   92.59   19.80
 -25   1  -2   44.30   13.20
  25   1   2   70.39   18.40
 -26  -2   2  -12.80   11.00
  26  -2  -2   17.80   14.40
 -26  -2   2    3.40    5.50
  26   2  -2   -9.90   12.80
 -24  -2   2  -13.50    9.80
  24  -2  -2    4.00   10.90
 -24  -2   2   10.60    5.40
  24   2  -2    1.90   13.70
 -22  -2   2  209.68   18.20
 -22  -2   2  205.68   27.00
  22  -2  -2  184.18   26.20
  22   2  -2  120.59   23.60
 -22   2   2  174.98   16.60
 -22   2   2  220.08   32.50
 -20  -2   2   28.60    5.90
  20  -2  -2   19.10   10.70
 -20  -2   2   35.60   12.00
  20   2  -2   42.20   14.90
 -20   2   2   34.40   12.80
 -20   2   2   30.20    5.00
  20   2  -2   32.30    6.00
  18  -2  -2  182.78   21.30
 -18  -2   2  134.09   22.40
 -18  -2   2  175.18   15.50
 -18   2   2  167.78   15.00
  18   2  -2  140.19   15.70
  18   2  -2  176.28   24.00
 -18   2   2  154.68   33.00
  16  -2  -2  312.77   30.00
 -16  -2   2  316.07   33.90
 -16  -2   2  371.36   28.80
  16  -2  -2  315.97   36.10
  16   2  -2  332.37   29.00
  16   2  -2  349.67   35.00
 -16   2   2  332.07   28.50
 -16   2   2  359.36   36.20
 -16   2   2  411.06   32.40
  14  -2  -2  481.15   42.00
  14  -2  -2  465.85   40.10
 -14  -2   2  510.45   39.00
 -14  -2   2  509.95   51.29
 -14   2   2  452.65   44.50
 -14   2   2  540.55   41.60
  14   2  -2  505.25   44.10
 -14   2   2  450.75   38.90
  14   2  -2  450.35   39.20
  12  -2  -2  314.67   28.20
 -12  -2   2  352.86   27.50
 -12  -2   2  390.66   31.70
  12  -2  -2  343.17   29.80
 -12   2   2  286.77   27.30
 -12   2   2  365.76   29.40
 -12   2   2  336.97   33.00
  12   2  -2  324.67   31.70
  12   2  -2  306.87   27.50
 -10  -2   2  715.33   56.09
 -10  -2   2  839.12   59.79
  10  -2  -2  651.23   56.59
  10  -2  -2  737.73   57.69
 -10   2   2  784.82   57.39
  10   2  -2  664.83   56.09
  10   2  -2  662.63   59.39
 -10   2   2  700.03   56.79
 -10   2   2  648.54   59.99
  -8  -2   2 1433.66  101.49
   8  -2  -2 1269.17   98.99
   8  -2  -2 1310.47   99.49
  -8  -2   2 1267.07   98.49
   8   2  -2 1219.58   98.59
  -8   2   2 1123.09  101.49
  -8   2   2 1226.78   98.89
   8   2  -2 1288.27  101.49
   6  -2  -2  626.64   50.49
  -6  -2   2  635.64   50.29
   6  -2  -2  683.43   50.69
  -6  -2   2  670.93   52.79
   6   2  -2  627.14   50.29
  -6   2   2  593.44   53.39
   6   2  -2  637.44   53.09
   4  -2  -2 8238.78  584.94
  -4  -2   2 7656.73  586.64
  -4  -2   2 7192.38  585.84
   4   2  -2 7538.75  586.84
  -4   2   2 6786.22  586.74
  -4   2   2 8150.38  585.04
   2  -2  -2    8.20    2.00
  -2  -2   2    3.70    2.00
  -2  -2   2    8.40    1.70
   2  -2  -2    4.80    3.10
  -2  -2   2    3.60    3.30
  -2   2   2    6.80    3.10
  -2   2   2    6.60    1.90
   2   2  -2    4.70    2.10
   2   2  -2    6.60    1.70
   0  -2  -2   35.80    4.70
   0  -2   2   30.50    3.10
   0  -2   2   36.50    5.20
   0  -2   2   39.10    3.70
   0  -2  -2   36.80    3.90
   0   2  -2   31.50    3.60
   0   2   2   34.90    3.90
   0   2  -2   32.70    3.10
   0   2   2   35.80    5.60
   0   2   2   29.70    4.90
   0   2  -2   34.20    5.20
   2  -2   2  963.70   75.29
   2  -2   2  908.61   75.19
  -2  -2  -2 1084.29   76.49
   2  -2   2  970.40   76.99
  -2   2  -2 1080.19   77.29
  -2   2  -2  936.71   75.29
   2   2   2  886.61   75.59
  -2   2  -2  950.60   75.19
   2   2   2  965.40   76.49
   4  -2   2  365.36   31.60
   4  -2   2  366.76   29.40
   4  -2   2  338.27   28.90
   4   2   2  368.66   29.40
  -4   2  -2  388.46   31.50
  -4   2  -2  363.86   28.80
   4   2   2  391.26   31.10
   6  -2   2  306.77   27.10
  -6  -2  -2  321.57   26.20
   6  -2   2  282.57   24.30
   6  -2   2  269.47   25.20
   6   2   2  275.47   26.10
   6   2   2  307.37   24.00
  -6   2  -2  318.07   26.50
   8  -2   2   79.69   10.50
   8  -2   2   84.39   13.40
  -8  -2  -2   67.89   11.10
   8  -2   2   73.69    9.10
  -8   2  -2   93.89   11.90
   8   2   2   89.29    8.00
   8   2   2   73.89   12.10
  10  -2   2 2410.76  189.18
 -10  -2  -2 2746.33  190.38
  10  -2   2 2342.77  187.68
  10  -2   2 2118.49  190.18
  10   2   2 2313.27  186.48
  10   2   2 2464.95  190.18
 -10   2  -2 2518.65  189.98
 -12  -2  -2  226.68   22.30
  12  -2   2  208.08   19.40
  12  -2   2  223.98   21.60
  12  -2   2  178.08   23.10
  12   2   2  214.98   23.00
  12   2   2  203.08   17.40
 -12   2  -2  216.08   22.00
  14  -2   2  436.46   39.10
 -14  -2  -2  476.55   41.30
  14  -2   2  412.46   36.60
  14   2   2  415.26   40.40
  14   2   2  394.66   34.70
 -14   2  -2  473.75   39.70
  16  -2   2  151.98   18.70
  16   2   2  132.99   13.30
  16   2   2  103.79   17.40
 -16   2  -2  128.39   18.20
  18  -2   2   -2.30    8.20
  18   2   2  -11.70    8.00
 -18   2  -2  -10.90    6.00
  20  -2   2   87.89   17.60
  20   2   2   74.69   18.30
  22  -2   2   99.09   32.70
 -22   2  -2   74.19   14.70
  22   2   2   65.89   22.90
  24  -2   2    7.80   13.70
  24   2   2    6.20   12.40
 -24   2  -2   -8.50   15.40
 -27  -3   2   17.40    6.60
  27  -3  -2  -13.90   11.60
  27   3  -2   -4.20   13.30
  25  -3  -2    7.40   23.50
 -25  -3   2   30.40    7.20
  25   3  -2   27.30   16.10
 -23  -3   2   -5.40    9.50
 -23  -3   2   20.50    6.30
  23  -3  -2   11.80   11.20
 -23   3   2    7.00    3.80
  23   3  -2   23.60   14.90
  23   3  -2   20.90    5.70
 -21  -3   2   55.49    8.00
  21  -3  -2   44.90   13.20
 -21  -3   2   41.80   12.60
  21   3  -2   44.50   13.80
  21   3  -2   43.90    7.60
 -21   3   2   48.80    6.70
 -19  -3   2   38.10    6.50
  19  -3  -2   29.40   10.80
 -19  -3   2   30.80   10.60
  19   3  -2   35.10    6.40
 -19   3   2   25.00   11.20
 -19   3   2   29.10    5.20
  19   3  -2   30.80   12.20
 -17  -3   2   45.50    7.00
  17  -3  -2   50.99   11.70
 -17   3   2   55.49    7.50
  17   3  -2   42.90    7.00
 -17   3   2   52.99   13.40
  17   3  -2   40.70   12.90
 -15  -3   2  133.99   13.10
  15  -3  -2  147.39   16.70
  15  -3  -2  126.69   14.00
 -15  -3   2  145.19   18.30
  15   3  -2  119.69   12.90
 -15   3   2  127.99   12.60
 -15   3   2  109.09   19.70
 -13  -3   2 1423.36  102.99
  13  -3  -2 1391.86   99.09
  13  -3  -2 1183.28   96.29
 -13  -3   2 1176.78   94.29
 -13   3   2 1121.59   99.19
  13   3  -2 1095.89   94.29
  13   3  -2 1113.09   98.69
 -13   3   2 1204.58   95.39
 -11  -3   2  983.40   69.79
 -11  -3   2  891.21   65.39
  11  -3  -2  840.62   66.79
  11  -3  -2  750.32   65.69
 -11   3   2  831.72   65.99
  11   3  -2  729.53   69.09
 -11   3   2  835.92   70.09
  11   3  -2  756.62   65.19
  -9  -3   2 4480.75  414.96
   9  -3  -2 5316.07  414.56
  -9  -3   2 6085.59  417.86
  -9  -3   2 5674.63  414.16
   9  -3  -2 5785.42  415.16
   9   3  -2 5021.60  417.46
   9   3  -2 5282.37  414.16
  -9   3   2 5286.87  417.96
  -9   3   2 5386.46  414.66
  -7  -3   2 4294.27  313.07
  -7  -3   2 3601.54  313.87
   7  -3  -2 4330.17  313.37
  -7   3   2 4007.80  316.27
   7   3  -2 4112.99  313.07
  -7   3   2 4123.19  313.27
   7   3  -2 3890.81  316.07
  -5  -3   2 6143.99  488.85
  -5  -3   2 6064.89  490.05
   5  -3  -2 6207.28  487.75
  -5  -3   2 6940.01  487.85
   5   3  -2 5869.71  490.25
  -5   3   2 6487.05  487.95
   5   3  -2 6740.03  487.85
  -5   3   2 6145.58  490.35
  -3  -3   2  188.88   17.00
  -3  -3   2  182.28   15.80
   3  -3  -2  153.78   18.70
   3   3  -2  214.78   16.60
   3   3  -2  178.78   17.10
   3   3  -2  150.68   18.60
  -3   3   2  191.98   21.00
  -3   3   2  198.18   15.90
   3   3  -2  198.58   15.60
   1  -3  -2 4495.45  393.86
  -1  -3   2 5172.78  392.86
   1  -3  -2 5097.79  393.46
  -1  -3   2 5152.48  393.36
  -1  -3   2 5393.86  394.96
  -1   3   2 5028.10  393.46
   1   3  -2 5082.99  392.86
   1   3  -2 5306.87  393.36
  -1   3   2 5017.80  394.96
   1   3  -2 5266.27  395.06
   1  -3   2 2409.76  191.08
   1  -3   2 2494.35  193.08
   1  -3   2 2288.17  190.68
  -1  -3  -2 2673.83  192.58
  -1  -3  -2 2546.85  192.38
   1   3   2 2180.38  192.18
   1   3   2 2566.34  192.18
  -1   3  -2 2661.23  194.88
   1   3   2 2406.36  191.38
  -1   3  -2 2510.45  191.18
   3  -3   2 2783.42  232.28
   3  -3   2 2739.53  232.38
   3  -3   2 3403.26  235.38
  -3   3  -2 2746.53  232.28
   3   3   2 2909.01  234.18
   3   3   2 3280.07  232.88
  -3   3  -2 3263.17  235.08
  -3   3  -2 2959.90  232.28
   5  -3   2  515.85   44.70
   5  -3   2  505.95   41.60
  -5   3  -2  556.94   44.40
   5   3   2  510.65   43.80
  -5   3  -2  505.85   41.60
  -5   3  -2  508.35   41.10
   5   3   2  559.74   41.90
   7  -3   2   39.10    8.70
   7  -3   2   36.50    5.60
  -7  -3  -2   56.59    9.80
   7   3   2   41.50    5.40
   7   3   2   36.70    8.50
  -7   3  -2   32.80    6.80
  -7   3  -2   32.00    4.70
   9  -3   2 1259.77  107.49
   9  -3   2 1263.47  109.99
  -9  -3  -2 1428.86  108.99
   9  -3   2 1258.07  106.29
  -9   3  -2 1527.45  109.69
   9   3   2 1254.17  108.89
  -9   3  -2 1443.56  105.09
   9   3   2 1403.96  105.79
  11  -3   2 1571.24  128.69
  11  -3   2 1502.55  132.49
 -11  -3  -2 1847.22  133.39
  11  -3   2 1558.94  130.09
  11   3   2 1589.14  131.69
 -11   3  -2 1839.42  132.19
  11   3   2 1607.14  127.59
  13  -3   2 1743.03  147.09
 -13  -3  -2 2094.89  150.88
  13  -3   2 1762.52  148.79
  13   3   2 1747.53  145.69
  13   3   2 1851.01  150.68
 -13   3  -2 2089.59  150.88
  15  -3   2  843.02   70.99
  15   3   2  811.62   66.89
  15   3   2  826.92   72.89
 -15   3  -2  911.01   72.49
  17  -3   2   17.80    8.50
  17  -3   2   11.00    9.60
 -17   3  -2   11.50    8.30
  17   3   2   14.00    4.10
  17   3   2   16.00   11.30
  19  -3   2  257.27   30.30
 -19   3  -2  276.47   31.00
  19   3   2  226.78   32.40
  19   3   2  314.57   24.30
  21  -3   2   -4.70   10.20
  21   3   2   -7.90   11.00
  23  -3   2   -8.10    8.90
  23   3   2   -1.70   12.80
  25  -3   2   38.20   14.60
  25   3   2   13.50   13.90
 -26  -4   2    4.60    6.80
  26  -4  -2   11.80   13.20
  26   4  -2    3.00    5.80
  26   4  -2   21.00   16.40
 -24  -4   2   17.10   10.30
 -24  -4   2   21.50   11.40
  24  -4  -2   23.30   12.90
  24   4  -2   29.10    6.70
  24   4  -2   40.00   17.70
  22  -4  -2  231.08   26.70
 -22  -4   2  202.88   21.30
 -22  -4   2  196.48   26.20
 -22  -4   2  235.18   21.00
 -22   4   2  205.58   18.40
  22   4  -2  179.88   20.10
  22   4  -2  183.88   30.70
  20  -4  -2  445.76   38.70
 -20  -4   2  436.96   33.50
 -20  -4   2  356.86   37.60
 -20  -4   2  350.36   34.00
  20   4  -2  361.86   41.90
  20   4  -2  362.76   34.70
 -20   4   2  388.76   32.10
  18  -4  -2   27.40    9.20
 -18  -4   2   23.70    6.00
 -18  -4   2   19.60    6.00
  18   4  -2   17.80   12.70
  18   4  -2   16.00    5.40
 -18   4   2   23.70    4.90
 -16  -4   2   11.20    4.90
  16  -4  -2   14.10    6.90
 -16  -4   2   18.60    5.40
  16   4  -2   19.50   11.20
  16   4  -2   10.00    4.10
 -16   4   2   13.40    9.10
 -14  -4   2 1378.96   96.99
  14  -4  -2 1101.89   91.89
  14  -4  -2 1216.88   93.39
 -14  -4   2 1039.60   92.09
 -14  -4   2 1223.18   91.39
 -14   4   2 1213.28  107.69
 -14   4   2 1197.18   92.29
  14   4  -2 1078.89   91.19
  14   4  -2 1001.00   95.99
 -12  -4   2  760.42   71.39
  12  -4  -2  794.12   61.49
 -12  -4   2  804.72   60.09
  12  -4  -2  728.03   60.59
 -12  -4   2  678.93   60.89
  12   4  -2  742.43   59.89
 -12   4   2  764.32   65.29
 -12   4   2  800.42   60.79
  12   4  -2  678.33   64.59
 -10  -4   2 2696.03  196.48
  10  -4  -2 2346.47  192.48
  10  -4  -2 2632.84  193.28
 -10  -4   2 2625.94  192.38
 -10  -4   2 2323.07  193.28
  10   4  -2 2142.29  195.98
 -10   4   2 2638.94  197.18
  10   4  -2 2356.56  192.18
 -10   4   2 2517.55  192.78
  -8  -4   2 1819.02  142.39
  -8  -4   2 1739.13  139.89
   8  -4  -2 1723.53  138.89
  -8  -4   2 1875.21  138.89
   8   4  -2 1867.91  138.99
  -8   4   2 1738.63  142.69
  -8   4   2 1779.72  139.19
   8   4  -2 1700.63  142.79
  -6  -4   2 3027.10  217.58
  -6  -4   2 2859.21  218.58
   6  -4  -2 2776.82  217.48
   6   4  -2 3049.79  217.58
   6   4  -2 2555.54  220.58
  -6   4   2 2825.82  220.78
   6   4  -2 2404.76  218.58
  -6   4   2 2937.11  217.68
  -4  -4   2   10.70    2.90
  -4  -4   2   10.70    5.60
  -4  -4   2   15.10    3.70
   4  -4  -2   12.80    2.90
   4  -4  -2    9.00    5.20
   4   4  -2   12.50    3.90
   4   4  -2    6.90    5.60
  -4   4   2   15.90    3.60
   4   4  -2   12.40    2.70
  -4   4   2   15.70    5.30
   4   4  -2   12.50    2.50
  -2  -4   2 1972.10  145.39
   2  -4  -2 1606.24  145.89
   2  -4  -2 1566.94  147.39
   2  -4  -2 1841.02  145.19
  -2  -4   2 2098.39  147.19
  -2  -4   2 1620.74  147.29
  -2   4   2 1928.91  145.39
  -2   4   2 2017.50  147.69
   2   4  -2 2002.80  147.39
   2   4  -2 2024.10  145.39
   2   4  -2 1869.41  144.69
   0  -4  -2 2110.59  160.48
   0  -4  -2 1749.32  161.88
   0  -4   2 2280.07  162.68
   0  -4  -2 1868.81  161.38
   0  -4   2 2062.99  160.38
   0  -4   2 2029.20  159.68
   0   4   2 2083.49  160.48
   0   4   2 2324.17  162.38
   0   4  -2 2050.19  159.78
   0   4   2 1937.31  160.48
   0   4  -2 2208.58  160.38
   0   4  -2 2358.26  162.98
   0   4   2 1796.12  161.38
   2  -4   2 2064.19  147.79
   2  -4   2 1783.12  144.19
  -2  -4  -2 1600.94  145.79
   2  -4   2 1749.82  144.69
   2   4   2 2153.28  145.99
  -2   4  -2 2000.40  144.69
   2   4   2 1788.52  144.89
   2   4   2 1629.64  146.29
  -2   4  -2 1807.42  144.29
  -2   4  -2 2111.99  147.79
   2   4   2 1807.12  144.89
   4  -4   2 1479.55  105.99
   4  -4   2 1198.28  101.69
  -4  -4  -2 1432.26  104.59
   4  -4   2 1120.29  101.79
   4   4   2 1488.85  102.59
  -4   4  -2 1208.68  101.79
   4   4   2 1255.27  102.39
   4   4   2 1301.97  102.39
  -4   4  -2 1261.37  102.39
  -4   4  -2 1440.16  105.39
   4   4   2 1213.28  104.39
  -6  -4  -2   32.30    5.10
   6  -4   2   35.30    5.20
   6  -4   2   23.20    7.10
  -6  -4  -2   38.90    8.10
   6   4   2   32.30    8.80
  -6   4  -2   32.70    4.50
   6   4   2   37.80    5.40
  -6   4  -2   35.30    5.40
  -6   4  -2   28.00    6.60
   8  -4   2   25.00    8.00
  -8  -4  -2   35.60    7.90
   8  -4   2   27.30    5.30
  -8   4  -2   42.20    5.30
  -8   4  -2   24.70    5.80
   8   4   2   28.00    4.70
  -8   4  -2   35.00    7.60
   8   4   2   21.50    7.80
 -10  -4  -2 1123.89   81.69
  10  -4   2  941.61   79.29
  10  -4   2  901.21   82.59
  10  -4   2  944.51   77.89
 -10   4  -2 1059.79   76.69
 -10   4  -2 1029.60   81.69
  10   4   2 1012.80   77.39
  10   4   2  830.72   80.69
  12  -4   2 1282.77  107.09
  12  -4   2 1287.37  105.49
  12  -4   2 1202.58  110.39
  12   4   2 1353.06  104.59
 -12   4  -2 1504.35  103.69
  12   4   2 1195.98  108.79
 -12   4  -2 1477.75  109.69
  14  -4   2  490.55   54.09
  14  -4   2  574.34   48.80
  14  -4   2  594.74   50.69
  14   4   2  573.64   53.39
 -14   4  -2  676.13   53.89
  14   4   2  596.74   47.20
  16  -4   2   89.29   18.30
  16  -4   2  129.79   17.70
 -16   4  -2  150.48   20.70
  16   4   2  109.59   20.50
  16   4   2  130.49   12.60
  18  -4   2   85.19   14.60
  18  -4   2   65.09   16.40
  18   4   2   95.29   19.70
  18   4   2   89.39   10.60
  20  -4   2    3.70    9.00
  20   4   2    5.70    4.60
  20   4   2   10.20   12.10
  22  -4   2   -1.00   10.00
  22   4   2   -4.50   11.60
  24  -4   2   41.50   15.40
  24   4   2   34.40   16.00
 -25  -5   2  -11.20    6.30
  25  -5  -2   -3.30   11.60
  25   5  -2   16.40   15.10
  23  -5  -2   -4.40    8.20
 -23  -5   2   -7.70    5.50
  23   5  -2   -3.30   10.90
  23   5  -2   -9.70    5.30
 -23   5   2    5.40    3.70
 -21  -5   2    0.70    9.00
  21  -5  -2   28.70   10.20
 -21  -5   2   15.70    6.60
 -21  -5   2   12.90    5.80
  21   5  -2    1.10   12.90
 -21   5   2   15.20    4.50
  21   5  -2    1.60    5.20
 -19  -5   2   62.99   10.90
  19  -5  -2   54.29   11.60
 -19  -5   2   65.79   10.90
  19   5  -2   46.40    8.50
 -19   5   2   62.49    9.20
  19   5  -2   59.69   15.50
 -17  -5   2   41.40    7.40
 -17  -5   2   38.70    7.60
  17  -5  -2   46.70   10.20
  17   5  -2   32.30   13.10
  17   5  -2   28.80    6.50
  15  -5  -2   56.59   16.00
  15  -5  -2   89.79   17.20
 -15  -5   2   75.99   11.10
 -15  -5   2   91.89   11.70
 -15   5   2   87.19   11.80
 -15   5   2   93.59   18.50
  15   5  -2   84.39   10.70
  15   5  -2   79.79   18.20
  13  -5  -2   49.90    8.30
  13  -5  -2   38.20   20.00
 -13  -5   2   61.69   13.20
 -13  -5   2   48.50    9.00
 -13  -5   2   55.79    7.50
  13  -5  -2   49.10    8.60
  13   5  -2   36.50   11.20
  13   5  -2   54.99    7.90
 -13   5   2   34.50    9.50
 -13   5   2   54.99    8.30
 -11  -5   2   24.80   12.60
  11  -5  -2    8.30    8.00
  11  -5  -2    4.90    4.00
 -11  -5   2   12.30    4.20
 -11  -5   2   11.40    4.30
  11  -5  -2   10.40    5.00
  11   5  -2    6.50    8.50
 -11   5   2    7.40    4.10
 -11   5   2   11.50    6.50
  11   5  -2    6.90    3.50
  -9  -5   2  214.48   23.40
   9  -5  -2  161.58   24.50
  -9  -5   2  220.88   19.90
   9  -5  -2  203.38   18.60
  -9  -5   2  223.18   18.90
   9   5  -2  152.68   23.50
   9   5  -2  217.38   18.70
  -9   5   2  222.98   23.80
  -9   5   2  205.38   19.00
   7  -5  -2  108.79   11.20
  -7  -5   2   95.79   15.90
  -7  -5   2  115.79   11.70
  -7  -5   2  128.79   13.10
   7   5  -2  117.79   11.40
  -7   5   2  125.19   16.50
  -7   5   2  108.59   11.70
   7   5  -2   89.89   12.10
   7   5  -2   69.89   14.20
  -5  -5   2  188.08   23.60
  -5  -5   2  230.48   20.10
  -5  -5   2  255.17   21.80
   5  -5  -2  209.28   19.50
   5  -5  -2  200.18   25.10
   5   5  -2  221.88   19.10
  -5   5   2  250.27   24.10
  -5   5   2  234.08   20.10
   5   5  -2  174.58   24.20
   5   5  -2  216.68   21.50
   5   5  -2  262.17   20.20
   3  -5  -2  122.99   18.40
  -3  -5   2  166.98   14.90
  -3  -5   2  153.78   18.00
   3  -5  -2  153.38   14.20
  -3  -5   2  167.88   16.90
   3   5  -2  170.78   14.80
  -3   5   2  168.88   14.80
   3   5  -2  157.38   16.70
  -3   5   2  167.18   17.90
   3   5  -2  163.78   14.00
  -1  -5   2  107.49   14.40
  -1  -5   2  110.79   11.00
  -1  -5   2  124.09   14.20
  -1  -5   2  116.99   11.60
   1  -5  -2  116.49   13.60
   1  -5  -2  108.59   11.00
   1  -5  -2  113.29   15.10
   1   5  -2  107.09   10.60
   1   5  -2  126.39   11.50
  -1   5   2  116.89   11.60
  -1   5   2  122.99   13.90
   1   5  -2  131.69   14.20
  -1   5   2  121.79   11.50
  -1  -5  -2  587.04   57.09
  -1  -5  -2  703.33   55.19
  -1  -5  -2  684.53   57.19
   1  -5   2  765.62   58.59
   1  -5   2  686.73   54.79
   1  -5   2  663.93   55.19
  -1   5  -2  679.33   54.59
   1   5   2  695.53   55.19
   1   5   2  688.33   55.39
  -1   5  -2  706.23   55.09
   1   5   2  754.12   56.89
  -1   5  -2  781.12   58.49
   1   5   2  590.34   56.89
  -3  -5  -2  875.51   65.29
   3  -5   2  865.31   66.49
   3  -5   2  709.33   62.09
   3  -5   2  748.13   61.49
  -3  -5  -2  696.63   63.79
  -3   5  -2  901.41   65.99
   3   5   2  759.52   62.39
  -3   5  -2  832.72   62.19
  -3   5  -2  790.02   61.79
   3   5   2  755.32   62.29
   3   5   2  695.23   64.79
   5  -5   2   65.19    7.60
  -5  -5  -2   53.49   10.10
  -5  -5  -2   79.09   13.00
   5  -5   2   74.29   14.10
   5   5   2   51.29   11.20
   5   5   2   79.49    8.60
  -5   5  -2   73.19   12.00
  -5   5  -2   68.99    7.90
  -5   5  -2   82.29    8.30
   5   5   2   80.19    9.00
   5   5   2   64.99    8.50
  -7  -5  -2   47.40    9.40
  -7  -5  -2   39.60    7.60
   7  -5   2   35.10    9.90
   7  -5   2   44.40    6.30
   7   5   2   39.40    6.00
   7   5   2   41.00    6.20
  -7   5  -2   49.90    6.90
  -7   5  -2   48.10    6.30
  -7   5  -2   39.80    8.60
   7   5   2   38.00    9.80
   9  -5   2   74.19   14.40
   9  -5   2   87.59   10.10
  -9  -5  -2   92.79   13.90
   9   5   2   59.29   12.90
  -9   5  -2   90.69   10.30
  -9   5  -2   97.79   14.40
  -9   5  -2  100.69    9.30
   9   5   2  101.19   10.20
  11  -5   2  154.68   24.20
  11  -5   2  150.88   18.30
 -11  -5  -2  189.38   21.50
  11   5   2  162.38   16.20
 -11   5  -2  193.78   15.60
 -11   5  -2  209.68   22.20
  11   5   2  154.08   22.30
  13  -5   2   -2.10    8.40
  13  -5   2    4.30    5.70
  13  -5   2    3.60    4.60
 -13   5  -2    1.40    6.30
  13   5   2   -2.70    8.10
  13   5   2    3.40    3.60
  15  -5   2    7.10   10.80
  15  -5   2   15.80    7.50
 -15   5  -2   15.60   14.30
  15   5   2   25.40   11.80
  15   5   2   22.70    5.30
  17  -5   2   -4.70    9.90
  17  -5   2    1.00    6.90
  17   5   2   -5.10   10.60
  17   5   2   -3.50    4.30
  19  -5   2   -3.00    7.50
  19  -5   2  -12.10    9.60
  19   5   2  -10.80   11.20
  21   5   2   51.29   17.20
  21   5   2   35.60    7.20
  23  -5   2   -2.80   10.80
  23   5   2    2.20   12.70
 -24  -6   2   29.10    9.00
  24  -6  -2   30.80   23.40
 -24   6   2   50.69    8.10
  24   6  -2   21.90   13.60
 -24   6   2   48.40    6.90
  22  -6  -2   29.10   11.00
 -22  -6   2   24.80    8.20
 -22   6   2   29.90    6.40
  22   6  -2   24.20   15.20
 -22   6   2   21.80    5.60
  20  -6  -2    6.10    7.70
 -20  -6   2    5.10    6.10
 -20  -6   2    2.00    4.70
 -20   6   2    2.30    4.20
  20   6  -2   -5.10   11.30
  18  -6  -2    4.80    7.10
 -18  -6   2    6.20    4.90
 -18  -6   2    3.40    5.40
  18   6  -2   -3.40    4.40
  18   6  -2   -5.00   10.50
 -16  -6   2   53.09    8.80
 -16  -6   2   72.79   10.70
  16  -6  -2   23.80   13.40
  16  -6  -2   54.39   10.40
 -16   6   2   53.39   10.40
  16   6  -2   47.20   16.20
  16   6  -2   62.09    8.70
 -14  -6   2  497.35   39.30
 -14  -6   2  442.86   43.60
 -14   6   2  483.85   39.20
  14   6  -2  407.56   38.00
  14   6  -2  410.96   45.50
 -12  -6   2  745.53   62.39
 -12  -6   2  804.42   63.29
  12  -6  -2  702.53   62.29
 -12  -6   2  786.62   67.49
  12  -6  -2  764.92   63.19
  12   6  -2  704.73   68.39
  12   6  -2  827.62   63.49
 -12   6   2  834.22   68.49
 -12   6   2  765.12   62.89
 -10  -6   2 1296.87   96.59
 -10  -6   2 1284.27  100.39
  10  -6  -2 1023.90  105.99
  10  -6  -2 1176.38   96.39
 -10  -6   2 1212.48   95.49
  10   6  -2 1158.88   95.29
 -10   6   2 1196.78   95.69
 -10   6   2 1343.47  100.99
  10   6  -2 1089.49  104.29
  -8  -6   2  788.52   70.19
  -8  -6   2  905.71   67.89
   8  -6  -2  764.62   65.89
  -8  -6   2  849.02   66.39
  -8   6   2  868.81   66.59
   8   6  -2  749.62   71.09
   8   6  -2  688.23   67.29
  -8   6   2  917.11   71.19
   8   6  -2  896.01   66.49
  -6  -6   2  591.14   47.20
   6  -6  -2  491.95   52.09
   6  -6  -2  562.34   46.60
  -6  -6   2  542.15   50.79
  -6  -6   2  618.94   48.90
  -6   6   2  629.54   47.30
   6   6  -2  579.24   46.30
   6   6  -2  616.24   47.20
  -6   6   2  657.03   51.69
   6   6  -2  490.25   51.19
   6   6  -2  527.15   48.60
  -4  -6   2  193.58   19.20
  -4  -6   2  187.48   22.80
   4  -6  -2  197.78   24.80
  -4  -6   2  239.88   21.90
   4  -6  -2  213.08   18.50
  -4   6   2  188.78   18.90
  -4   6   2  225.68   22.90
   4   6  -2  212.88   21.40
   4   6  -2  204.28   19.00
  -4   6   2  222.78   19.20
   4   6  -2  212.28   18.20
  -2  -6   2    3.90    4.70
   2  -6  -2    3.40    2.80
   2  -6  -2    2.40    6.40
  -2  -6   2    4.10    3.40
   2  -6  -2   -3.50    5.00
  -2  -6   2    1.30    6.40
  -2  -6   2    3.60    2.70
  -2   6   2    6.30    4.90
   2   6  -2    5.30    3.50
   2   6  -2    1.00    2.70
   2   6  -2    2.40    4.40
  -2   6   2    0.10    3.60
  -2   6   2    5.20    3.60
   0  -6   2  830.72   67.09
   0  -6   2  977.70   72.09
   0  -6   2  798.52   68.09
   0  -6  -2  852.31   67.89
   0  -6  -2  725.73   70.99
   0  -6  -2  736.03   69.89
   0   6   2  862.41   68.09
   0   6   2  861.81   68.29
   0   6  -2  961.90   71.69
   0   6  -2  859.01   67.39
   0   6  -2  924.61   68.19
   2  -6   2 1744.33  143.89
   2  -6   2 2013.70  148.29
   2  -6   2 1724.83  142.99
  -2  -6  -2 1728.93  146.29
  -2  -6  -2 1617.84  146.09
  -2   6  -2 2146.29  148.09
  -2   6  -2 1801.52  143.39
   2   6   2 1906.11  144.19
   2   6   2 2135.49  145.99
  -2   6  -2 1954.60  143.89
   2   6   2 1775.92  143.89
   2   6   2 1543.45  145.99
  -4  -6  -2  327.77   33.50
   4  -6   2  344.47   30.50
   4  -6   2  381.86   36.60
  -4  -6  -2  383.56   34.90
   4   6   2  441.26   32.80
   4   6   2  341.57   31.20
  -4   6  -2  430.16   35.80
  -4   6  -2  359.46   30.90
  -4   6  -2  391.66   31.20
   4   6   2  388.06   31.70
   4   6   2  326.57   34.80
  -6  -6  -2  316.07   26.80
   6  -6   2  244.98   21.00
   6  -6   2  252.17   28.00
  -6  -6  -2  209.08   23.10
  -6   6  -2  225.98   21.20
   6   6   2  207.78   25.80
   6   6   2  248.48   21.80
  -6   6  -2  250.27   25.80
  -6   6  -2  256.47   21.30
   6   6   2  263.77   22.00
   8  -6   2   47.70   12.00
  -8  -6  -2   74.29   10.70
   8  -6   2   65.69    8.40
  -8  -6  -2   85.99   14.60
   8   6   2   85.09   15.30
   8   6   2   57.19    8.30
  -8   6  -2   71.99    9.00
  -8   6  -2   75.09    8.60
  -8   6  -2   89.79   14.20
   8   6   2   80.19    9.30
  10  -6   2  368.66   33.90
  10  -6   2  292.47   37.40
 -10  -6  -2  392.56   35.50
  10   6   2  324.17   36.10
 -10   6  -2  375.26   29.90
  10   6   2  374.46   30.80
 -10   6  -2  341.97   30.90
 -10   6  -2  386.06   35.90
  12  -6   2  485.15   43.60
  12  -6   2  486.45   41.80
  12  -6   2  408.76   49.50
 -12   6  -2  546.95   40.70
  12   6   2  479.95   47.70
  12   6   2  546.75   41.70
 -12   6  -2  508.05   49.60
  14  -6   2  394.56   47.40
  14  -6   2  497.85   41.70
 -14   6  -2  500.95   37.20
  14   6   2  381.16   44.90
  16  -6   2  298.87   32.00
  16  -6   2  271.27   38.20
 -16   6  -2  358.46   26.70
  16   6   2  312.57   37.10
  16   6   2  310.27   28.10
  18  -6   2   47.70   11.30
  18  -6   2   36.00   15.60
  18   6   2   47.30    8.40
  18   6   2   52.69   15.60
  20  -6   2    6.50   12.90
  20  -6   2   19.60   10.20
  20   6   2   16.90    6.20
  20   6   2   16.30   23.00
  22  -6   2  -10.10    8.50
  22   6   2    1.10   13.60
  22   6   2  -12.30    5.40
  23  -7  -2   54.09   13.40
 -23  -7   2   57.79   11.30
 -23   7   2   60.19    9.80
  23   7  -2   52.59   17.20
 -23   7   2   57.49    8.70
  21  -7  -2   47.30   12.20
 -21  -7   2   49.00    9.90
 -21   7   2   47.90    8.30
  21   7  -2   44.20   21.20
  19  -7  -2   23.30    9.70
 -19  -7   2   38.60    7.50
 -19  -7   2   39.90    9.30
  19   7  -2   21.40   15.10
 -19   7   2   34.00    7.00
 -17  -7   2    2.20    5.70
  17  -7  -2    7.40    6.90
  17  -7  -2   -8.80   10.10
 -17  -7   2    7.80    5.20
 -17   7   2    1.70    4.70
  17   7  -2    9.10   12.30
 -17   7   2    5.80    6.50
 -15  -7   2  258.57   23.40
 -15  -7   2  218.68   22.90
  15  -7  -2  254.17   24.50
  15   7  -2  186.58   30.40
 -15   7   2  249.28   23.70
 -15   7   2  218.18   22.00
 -13  -7   2 1282.47  103.79
 -13  -7   2 1487.05  104.89
  13   7  -2 1269.97  103.59
 -13   7   2 1229.48  102.99
  13   7  -2 1142.09  109.89
 -13   7   2 1351.16  104.29
  11  -7  -2 1805.12  145.69
 -11  -7   2 1820.42  145.99
 -11  -7   2 2105.19  147.49
  11   7  -2 1793.62  145.89
  11   7  -2 1706.13  151.88
 -11   7   2 1934.11  146.39
 -11   7   2 1784.42  145.39
  -9  -7   2 2956.50  234.48
  -9  -7   2 3235.28  231.58
   9  -7  -2 2700.63  229.28
  -9  -7   2 3163.38  234.08
   9   7  -2 3083.09  229.98
  -9   7   2 3008.20  234.68
   9   7  -2 2630.44  234.88
  -9   7   2 2801.02  229.38
   9   7  -2 2947.21  229.28
  -7  -7   2 1186.98  100.79
   7  -7  -2 1124.29   95.19
  -7  -7   2 1288.27   95.99
   7  -7  -2 1016.60  101.99
  -7  -7   2 1378.36   98.09
   7   7  -2 1102.29   97.59
   7   7  -2 1080.09  100.49
   7   7  -2 1179.58   94.89
  -7   7   2 1357.26  100.69
   7   7  -2 1259.77   95.79
  -7   7   2 1307.87   95.99
  -7   7   2 1142.09   95.39
   5  -7  -2  681.13   70.29
  -5  -7   2  923.41   68.29
  -5  -7   2  762.72   69.29
   5  -7  -2  743.13   64.69
  -5  -7   2  782.82   65.49
  -5   7   2  857.11   65.59
   5   7  -2  830.42   64.69
  -5   7   2  906.11   69.79
  -5   7   2  796.52   65.29
   5   7  -2  821.62   68.09
  -3  -7   2    0.60    3.70
   3  -7  -2   -1.30    5.30
   3  -7  -2    2.50    2.80
  -3  -7   2    5.70    6.40
   3  -7  -2   -1.50    6.00
  -3  -7   2    5.10    5.10
  -3   7   2    0.20    4.10
  -3   7   2    1.60    3.80
  -3   7   2    5.10    3.30
   3   7  -2    7.20    4.40
   3   7  -2    6.70    3.50
   3   7  -2    3.00    3.20
  -1  -7   2  770.02   60.79
  -1  -7   2  742.13   61.89
   1  -7  -2  760.82   61.39
   1  -7  -2  647.44   65.59
  -1  -7   2  833.52   65.79
   1  -7  -2  650.63   63.59
  -1  -7   2  619.44   64.39
  -1   7   2  877.41   65.09
   1   7  -2  833.72   61.89
  -1   7   2  779.82   61.79
  -1   7   2  782.92   61.89
   1   7  -2  783.72   61.09
   1   7  -2  850.61   65.59
  -1  -7  -2  833.82   79.19
  -1  -7  -2  831.32   78.09
   1  -7   2  989.90   80.29
  -1  -7  -2  930.51   75.69
   1  -7   2  886.61   74.79
   1  -7   2  841.72   75.79
  -1   7  -2 1046.50   75.99
   1   7   2  986.10   76.19
  -1   7  -2  962.20   75.29
  -1   7  -2 1094.49   80.29
   1   7   2  938.31   75.89
   1   7   2 1069.59   78.49
  -3  -7  -2 1352.56  121.09
   3  -7   2 1370.26  117.39
   3  -7   2 1564.44  123.59
  -3  -7  -2 1484.25  121.49
   3   7   2 1499.05  118.39
   3   7   2 1743.83  120.59
   3   7   2 1258.17  121.19
  -3   7  -2 1643.14  118.49
  -3   7  -2 1523.45  117.99
   3   7   2 1590.24  118.89
  -5  -7  -2   57.99   11.40
  -5  -7  -2   51.49   10.10
   5  -7   2   35.20   12.00
   5  -7   2   57.39    7.20
   5   7   2   51.29   13.20
  -5   7  -2   49.50    7.30
   5   7   2   61.99    8.40
  -5   7  -2   68.19    8.40
  -5   7  -2   53.19   10.60
   5   7   2   69.39    9.60
   7  -7   2   -2.40    7.30
   7  -7   2    1.80    3.00
  -7  -7  -2   -3.60    5.00
   7   7   2    5.70    8.10
  -7   7  -2    1.20    3.70
   7   7   2    7.40    4.70
  -7   7  -2   -0.10    4.10
   7   7   2    8.20    4.30
   7   7   2    0.40    3.00
  -7   7  -2    6.30    5.70
  -9  -7  -2  298.27   30.80
   9  -7   2  348.47   38.50
  -9  -7  -2  364.36   34.80
   9   7   2  371.56   29.90
   9   7   2  285.47   31.00
  -9   7  -2  354.36   29.70
  -9   7  -2  350.66   29.00
  -9   7  -2  407.36   41.10
   9   7   2  357.76   30.10
   9   7   2  294.27   35.10
  11  -7   2  785.32   81.29
  11  -7   2  843.82   73.29
 -11   7  -2  929.61   73.99
  11   7   2 1024.90   73.89
  11   7   2  820.62   79.19
 -11   7  -2 1033.40   72.99
  13  -7   2  764.12   78.89
  13  -7   2  908.21   72.69
  13   7   2  709.43   75.69
  13   7   2  917.21   70.19
 -13   7  -2  973.70   69.29
  15  -7   2  845.62   72.19
  15   7   2  778.32   76.09
 -15   7  -2  921.91   68.09
  15   7   2  835.22   69.09
  17  -7   2  216.18   25.80
  17  -7   2  168.88   33.50
 -17   7  -2  259.57   20.20
  17   7   2  184.88   30.80
  19  -7   2   61.89   20.00
  19  -7   2   93.89   16.30
  19   7   2  100.39   32.50
  21  -7   2  -15.10    9.90
  21  -7   2   13.70    9.30
  21   7   2   -5.30   11.70
  22  -8  -2    3.80    8.00
 -22  -8   2   -0.30    7.40
  22   8  -2   -3.30   12.80
 -22   8   2   -0.90    6.70
 -20  -8   2    4.70    7.30
  20  -8  -2   34.20   11.60
 -20   8   2   22.30    7.30
  20   8  -2   12.40   13.50
  18  -8  -2   52.29   11.50
 -18  -8   2   50.79    9.20
  18  -8  -2   33.00   16.80
 -18  -8   2   52.79   11.20
 -18   8   2   51.29    8.90
  18   8  -2   32.80   15.80
 -18   8   2   63.29   11.70
  16  -8  -2   44.70   10.50
 -16  -8   2   46.00    8.90
  16  -8  -2   28.20   16.30
 -16  -8   2   36.20    9.80
  16   8  -2   34.80   15.20
 -16   8   2   48.40    8.70
 -16   8   2   61.49   10.50
  14  -8  -2  430.46   37.90
 -14  -8   2  385.66   36.90
 -14  -8   2  455.75   37.80
  14   8  -2  340.57   44.30
 -14   8   2  439.36   37.40
 -14   8   2  398.96   35.90
 -12  -8   2  858.91   64.99
 -12  -8   2  749.13   63.49
 -12   8   2  812.92   63.89
  12   8  -2  647.44   69.79
 -12   8   2  739.13   62.79
 -10  -8   2 1138.89   87.89
  10  -8  -2  893.11   94.89
 -10   8   2 1143.09   87.29
  10   8  -2 1041.70   94.29
 -10   8   2 1202.98   88.19
   8  -8  -2  870.11   91.49
  -8  -8   2 1070.09   85.19
  -8  -8   2 1180.78   87.59
   8  -8  -2 1055.89   84.39
  -8  -8   2 1032.60   89.79
   8   8  -2 1071.59   84.09
  -8   8   2 1030.50   84.49
   8   8  -2  956.00   86.89
  -8   8   2 1136.29   85.29
   8   8  -2 1046.00   91.49
   8   8  -2 1157.08   85.39
  -6  -8   2  917.71   87.49
  -6  -8   2 1039.60   83.89
  -6  -8   2 1197.38   86.89
   6  -8  -2  962.20   82.69
   6  -8  -2  919.51   89.89
   6   8  -2 1124.09   83.79
  -6   8   2 1186.58   88.59
  -6   8   2 1031.10   87.39
   6   8  -2 1054.89   82.79
   6   8  -2 1000.80   86.29
  -6   8   2 1001.40   83.29
  -4  -8   2  196.18   21.80
  -4  -8   2  147.59   17.50
   4  -8  -2  145.79   29.30
   4  -8  -2  172.78   17.50
   4  -8  -2  163.88   20.20
  -4  -8   2  167.78   21.80
   4   8  -2  160.38   16.30
  -4   8   2  194.98   21.50
   4   8  -2  169.88   20.20
  -4   8   2  178.28   17.40
  -4   8   2  187.68   17.60
   4   8  -2  189.48   17.60
   2  -8  -2   12.80    7.00
  -2  -8   2   11.80    3.90
   2  -8  -2   -0.70    6.70
  -2  -8   2   -2.10    5.60
  -2  -8   2    8.80    6.50
  -2  -8   2    4.30    7.30
   2  -8  -2    6.30    6.70
  -2   8   2    4.20    5.30
   2   8  -2    5.90    5.00
   2   8  -2    5.30    3.60
  -2   8   2    8.00    4.00
   2   8  -2    5.10    3.60
  -2   8   2    6.50    4.20
   0  -8   2    1.40    6.10
   0  -8  -2    4.20    7.10
   0  -8   2    1.60    2.90
   0  -8  -2    3.40    5.90
   0  -8   2    0.50    4.00
   0   8  -2    6.60    3.60
   0   8   2    3.10    4.70
   0   8  -2   -0.70    4.40
   0   8   2    3.80    3.60
   0   8   2    2.80    4.00
   0   8  -2    2.20    3.30
   2  -8   2  153.98   14.60
   2  -8   2  156.38   22.10
  -2  -8  -2  129.79   19.50
  -2  -8  -2  130.59   21.20
  -2   8  -2  161.38   15.30
  -2   8  -2  148.79   16.30
   2   8   2  159.28   16.30
   2   8   2  188.88   19.10
  -2   8  -2  175.18   20.20
   2   8   2  154.28   16.00
  -4  -8  -2  353.66   33.00
   4  -8   2  338.17   35.30
  -4  -8  -2  271.37   32.10
   4  -8   2  289.07   27.00
   4   8   2  345.27   28.80
  -4   8  -2  325.27   27.90
   4   8   2  271.07   32.60
   4   8   2  351.06   30.30
   4   8   2  313.37   30.70
  -4   8  -2  352.16   33.30
  -6  -8  -2   45.20   11.40
   6  -8   2   30.70    5.80
  -6  -8  -2   16.00    8.70
   6  -8   2   24.80   11.00
  -6   8  -2   23.60    6.30
   6   8   2   28.30    6.90
   6   8   2   31.20    6.30
   6   8   2   32.80    6.90
   6   8   2   11.00   11.30
  -6   8  -2   33.50    6.80
  -8  -8  -2  295.07   29.40
   8  -8   2  263.57   22.70
  -8  -8  -2  218.38   26.60
   8  -8   2  233.88   32.70
  -8   8  -2  268.97   23.00
   8   8   2  279.07   24.30
   8   8   2  232.88   24.00
   8   8   2  189.48   29.60
  -8   8  -2  267.27   23.60
   8   8   2  259.47   23.70
  10  -8   2  611.04   48.80
  10  -8   2  572.14   58.79
 -10  -8  -2  561.14   50.79
 -10   8  -2  677.43   48.80
  10   8   2  604.34   49.40
 -10   8  -2  625.44   49.30
  10   8   2  559.54   55.79
  10   8   2  502.65   48.60
  12  -8   2  479.95   56.99
  12   8   2  567.14   47.80
 -12   8  -2  618.64   47.70
 -12   8  -2  601.14   46.30
  12   8   2  484.45   53.69
  14  -8   2  396.46   50.99
  14  -8   2  500.45   43.50
  14   8   2  400.66   47.40
 -14   8  -2  525.15   39.40
  16  -8   2   89.89   15.60
  16  -8   2   44.20   17.30
 -16   8  -2   50.79    8.20
  16   8   2   55.09   15.50
  18  -8   2  112.69   18.60
  18  -8   2   76.29   21.50
 -18   8  -2   96.69   12.00
  18   8   2   97.09   32.00
  20  -8   2   -3.10    7.20
  20  -8   2  -29.40   24.30
  20   8   2   11.40   15.10
 -21  -9   2   30.60    9.40
  21  -9  -2   41.20   11.90
  21   9  -2   33.40   14.90
  19  -9  -2  213.88   23.70
 -19  -9   2  205.68   21.50
 -19  -9   2  166.28   21.40
  19   9  -2  113.79   28.00
 -19   9   2  198.48   34.60
 -17  -9   2  144.99   18.20
 -17  -9   2   89.39   15.20
  17  -9  -2  139.79   18.50
 -17   9   2  154.98   18.00
  17   9  -2   80.89   21.70
 -15  -9   2    2.20    6.80
  15  -9  -2   -5.20   11.60
 -15  -9   2   13.60    7.40
  15  -9  -2    6.30    7.50
  15   9  -2    4.80   12.60
 -15   9   2   23.60    8.70
 -13  -9   2   -7.70    5.90
  13  -9  -2   -5.20   10.40
 -13  -9   2    1.30    6.50
 -13   9   2    1.90    5.80
  13   9  -2    9.40   12.10
  13   9  -2    3.50    4.60
 -11  -9   2   27.60    8.70
 -11  -9   2   21.10    7.60
  11  -9  -2   14.00   12.80
  11   9  -2   42.00    7.60
  11   9  -2   16.20   12.30
 -11   9   2   32.90    8.40
  -9  -9   2  157.88   19.70
  -9  -9   2  220.18   23.20
   9  -9  -2  149.09   29.50
  -9   9   2  196.68   19.80
   9   9  -2  208.58   18.40
   9   9  -2  159.18   28.00
   9   9  -2  157.88   20.60
   7  -9  -2   13.40   10.90
  -7  -9   2   44.00   10.60
  -7  -9   2   27.00    7.80
  -7   9   2   37.10    7.80
   7   9  -2   39.50    7.50
  -7   9   2   25.90    9.10
   5  -9  -2  607.54   58.49
   5  -9  -2  603.14   63.59
  -5  -9   2  507.45   68.49
  -5  -9   2  753.82   60.79
  -5  -9   2  662.83   56.39
   5  -9  -2  675.13   55.19
   5   9  -2  735.93   55.29
  -5   9   2  767.22   56.59
   5   9  -2  679.73   59.49
  -3  -9   2   82.29   15.70
   3  -9  -2   84.59   14.50
  -3  -9   2   69.59   14.70
   3  -9  -2   68.29   10.30
  -3  -9   2   80.29   11.80
   3  -9  -2   61.79   16.40
  -3   9   2  103.79   13.30
   3   9  -2   85.09   10.90
  -3   9   2   79.89   15.90
   3   9  -2   81.09   14.60
  -1  -9   2  803.72   66.59
  -1  -9   2  768.52   59.89
   1  -9  -2  662.63   63.79
  -1  -9   2  676.33   61.09
   1  -9  -2  727.93   60.39
   1  -9  -2  671.03   79.19
  -1  -9   2  598.34   64.39
   1   9  -2  796.72   65.69
   1   9  -2  785.02   60.39
  -1   9   2  802.92   61.29
  -1   9   2  828.22   64.99
   1  -9   2  511.25   42.70
   1  -9   2  502.15   49.99
  -1  -9  -2  522.45   43.70
   1  -9   2  440.46   47.80
  -1  -9  -2  459.55   49.80
  -1  -9  -2  491.45   47.80
  -1   9  -2  558.04   43.60
   1   9   2  571.54   44.40
  -1   9  -2  599.24   50.39
   1   9   2  559.24   57.29
  -1   9  -2  522.95   43.90
   3  -9   2  225.18   22.10
  -3  -9  -2  259.47   28.40
   3  -9   2  239.18   30.70
  -3  -9  -2  219.88   29.30
  -3   9  -2  275.77   23.70
  -3   9  -2  247.28   23.20
   3   9   2  283.97   26.50
   3   9   2  273.17   24.00
  -5  -9  -2  180.18   25.90
  -5  -9  -2  207.28   25.70
   5  -9   2  177.68   28.70
  -5   9  -2  216.48   20.70
  -5   9  -2  225.88   20.80
   5   9   2  200.18   26.60
   5   9   2  235.58   23.10
   5   9   2  238.88   21.30
  -7  -9  -2  171.98   24.70
   7  -9   2  176.68   18.50
   7  -9   2  214.18   31.00
   7   9   2  173.18   26.30
   7   9   2  185.98   20.90
  -7   9  -2  228.88   19.60
  -7   9  -2  229.48   21.80
   7   9   2  186.58   19.80
   9  -9   2  262.57   23.20
  -9  -9  -2  221.18   27.60
   9  -9   2  217.78   34.60
  -9   9  -2  262.07   24.20
   9   9   2  264.27   32.20
  -9   9  -2  276.07   23.70
   9   9   2  262.87   24.30
   9   9   2  229.48   24.40
  11  -9   2  127.79   26.60
 -11  -9  -2  138.79   20.90
 -11   9  -2  184.78   18.50
  11   9   2  140.29   25.70
 -11   9  -2  175.78   17.30
  11   9   2  179.48   18.10
  13  -9   2   -2.50   11.80
  13   9   2   -1.70   11.00
 -13   9  -2   13.90    7.40
  13   9   2    8.00    6.70
 -13   9  -2   -0.20    5.10
  15  -9   2   39.30   10.80
  15  -9   2   24.80   16.40
  15   9   2   29.00    8.60
  15   9   2   22.00   15.30
 -15   9  -2   19.30    7.90
  17  -9   2    5.20   14.90
  17  -9   2   13.50    9.30
 -17   9  -2    6.80    6.80
  19  -9   2  -18.30   12.70
  19  -9   2   -0.70    8.50
  19   9   2    7.10   12.70
 -20 -10   2  170.48   21.60
  20 -10  -2  206.28   24.50
 -20 -10   2  181.28   22.40
  20  10  -2  117.89   30.80
 -20  10   2  167.18   23.20
 -18 -10   2  274.27   29.70
 -18 -10   2  315.67   30.80
  18 -10  -2  273.37   31.10
 -18  10   2  385.36   35.00
  18  10  -2  245.38   38.60
  18  10  -2  299.37   29.10
  16 -10  -2   53.39   21.10
  16 -10  -2  109.29   16.30
 -16 -10   2  107.09   17.30
 -16 -10   2   62.99   11.80
 -16  10   2  115.49   15.50
  16  10  -2   76.79   12.40
  16  10  -2   70.09   20.30
  14 -10  -2   -7.70   10.60
 -14 -10   2   -7.30    6.50
 -14 -10   2   -5.90    6.20
  14  10  -2   11.90    6.30
 -14  10   2    0.90    6.40
  14  10  -2  -12.60   11.90
 -12 -10   2   57.79   12.40
  12 -10  -2   31.50   16.70
 -12 -10   2   45.60   10.20
  12  10  -2   64.79   10.10
  12  10  -2   79.59   18.60
 -12  10   2   55.49   10.40
 -10 -10   2  162.88   19.80
  10 -10  -2  146.79   28.00
 -10 -10   2  226.98   36.40
  10  10  -2  135.99   25.00
 -10  10   2  203.48   20.00
  10  10  -2  155.88   20.60
  -8 -10   2   37.40   10.70
   8 -10  -2   13.10   13.00
  -8 -10   2   15.40    7.40
   8  10  -2   38.30    7.40
   8  10  -2   23.60    9.10
  -8  10   2   50.69   10.40
  -6 -10   2  273.47   27.60
   6 -10  -2  207.88   36.30
  -6 -10   2  294.77   32.10
   6  10  -2  283.97   30.80
  -6  10   2  305.67   27.70
   6  10  -2  325.27   26.40
   4 -10  -2  404.36   44.00
   4 -10  -2  392.76   49.20
  -4 -10   2  549.65   47.30
  -4 -10   2  432.16   41.40
   4  10  -2  528.35   42.20
   4  10  -2  449.26   48.20
  -4  10   2  541.95   41.70
  -2 -10   2  748.13   61.89
  -2 -10   2  631.44   55.49
   2 -10  -2  582.84   62.79
   2 -10  -2  538.75   57.89
   2  10  -2  747.33   54.69
  -2  10   2  690.23   55.39
   0 -10   2 1850.41  152.08
   0 -10  -2 1620.74  157.78
   0 -10  -2 1801.62  155.88
   0 -10   2 2004.30  158.88
   0  10   2 2045.00  152.78
   0  10  -2 2027.60  151.98
   0  10   2 2148.98  156.68
  -2 -10  -2 1633.64  149.29
  -2 -10  -2 1621.84  151.08
   2 -10   2 1899.71  153.18
   2 -10   2 1725.13  144.49
   2  10   2 2086.99  149.69
  -2  10  -2 1956.10  145.69
   2  10   2 1985.20  146.29
  -4 -10  -2  787.92   75.29
  -4 -10  -2  851.11   77.49
   4 -10   2  793.52   68.69
   4 -10   2  769.52   77.19
  -4  10  -2  915.61   71.19
   4  10   2  972.60   73.89
   4  10   2  905.01   70.29
  -6 -10  -2  413.96   45.60
   6 -10   2  446.06   50.09
   6 -10   2  469.55   39.30
   6  10   2  426.66   46.90
  -6  10  -2  515.25   40.80
   6  10   2  488.75   40.90
   6  10   2  501.95   42.90
   8 -10   2   42.90   15.00
  -8 -10  -2   48.50   13.20
   8  10   2   64.89   18.00
  -8  10  -2   65.19   10.90
   8  10   2   52.09   10.30
   8  10   2   82.19   11.30
 -10 -10  -2   -1.80    8.40
  10 -10   2   -1.20   11.80
 -10  10  -2   10.60    7.20
  10  10   2    2.70    9.50
  10  10   2   13.50    5.90
  10  10   2    7.20    5.10
  12 -10   2  268.17   39.70
 -12 -10  -2  245.98   28.70
  12  10   2  278.27   34.60
  14 -10   2   11.00   13.20
  14  10   2   25.10    9.40
  14  10   2   33.60   14.90
 -14  10  -2   35.70    9.60
  16 -10   2   52.59   20.50
  16 -10   2   71.29   21.70
 -16  10  -2   44.70    9.40
  16  10   2   46.50   16.50
  16  10   2   68.29   12.40
  18 -10   2  -12.40   13.60
  18 -10   2    0.90    7.80
  18  10   2   -3.70    7.40
  18  10   2   -0.60   12.10
 -19 -11   2  353.76   35.40
 -19 -11   2  329.57   34.50
  19 -11  -2  336.97   36.30
  19  11  -2  307.57   44.10
  19  11  -2  353.36   33.70
 -19  11   2  384.56   35.70
  17 -11  -2  198.88   23.80
 -17 -11   2  144.49   26.20
 -17 -11   2  187.68   24.20
  17  11  -2  129.49   28.50
 -17  11   2  185.38   22.80
  17  11  -2  207.58   21.10
  15 -11  -2   -4.40   13.70
 -15 -11   2   -0.70    6.90
  15  11  -2   -1.60    6.00
 -15  11   2   -7.30    7.00
  15  11  -2  -17.20   11.60
  13 -11  -2    6.10   13.20
 -13 -11   2    6.40    8.00
 -13 -11   2    9.90    6.90
  13  11  -2   14.50    6.20
 -13  11   2   -1.00    7.10
  13  11  -2   -8.40   10.20
 -11 -11   2  156.08   21.00
 -11 -11   2  202.98   25.10
  11  11  -2  144.49   21.80
 -11  11   2  183.08   21.10
  11  11  -2  179.18   31.10
  11  11  -2  228.78   20.00
  -9 -11   2   84.89   14.50
  -9 -11   2  130.39   21.20
  -9  11   2  125.19   16.30
   9  11  -2  118.89   14.60
  -7 -11   2   57.59   11.30
  -7 -11   2   79.99   15.40
   7 -11  -2   71.89   19.50
  -7  11   2  115.79   14.90
   7  11  -2  110.79   12.80
  -5 -11   2   15.50   10.20
   5 -11  -2   23.50   15.00
  -5 -11   2   14.60    7.60
   5  11  -2   30.50    7.50
  -5  11   2   33.80    8.40
   3 -11  -2  211.78   30.90
  -3 -11   2  246.58   31.80
   3 -11  -2  177.18   34.20
   3  11  -2  286.37   23.90
  -3  11   2  252.17   24.50
  -1 -11   2  805.22   72.39
  -1 -11   2  712.03   63.49
   1 -11  -2  661.73   72.59
   1  11  -2  881.51   64.59
  -1  11   2  852.51   65.49
  -1 -11  -2 1183.28  115.09
   1 -11   2 1363.86  116.19
   1 -11   2 1253.47  106.99
  -1  11  -2 1519.65  108.39
   1  11   2 1448.76  108.99
   3 -11   2  984.60   86.09
   3 -11   2  843.72   75.59
  -3 -11  -2  846.62   83.29
   3  11   2 1033.70   77.49
  -3  11  -2 1012.40   76.89
  -5 -11  -2  536.95   56.29
   5 -11   2  556.84   59.39
   5  11   2  602.24   52.79
   5  11   2  616.24   50.29
  -5  11  -2  621.24   50.09
   7 -11   2  152.58   31.10
   7  11   2  200.68   20.30
   7  11   2  181.78   22.10
  -7  11  -2  194.98   20.20
   9 -11   2   -3.20   12.00
   9  11   2   -1.50    5.50
   9  11   2   -1.80    5.70
   9  11   2  -16.70    9.90
  -9  11  -2    6.20    6.60
 -11 -11  -2   86.79   17.10
  11  11   2  102.89   21.60
  11  11   2  130.39   16.70
  11  11   2  121.29   15.80
 -11  11  -2  149.79   16.40
 -13 -11  -2   57.29   13.00
  13 -11   2   32.10   16.80
 -13  11  -2   88.49   13.20
  13  11   2   71.99   19.00
  13  11   2   84.39   14.00
 -15  11  -2   45.00   11.50
  15  11   2   46.40   11.80
  15  11   2   27.70   15.70
  17 -11   2   -4.80   15.60
  17 -11   2   25.60   11.70
  17  11   2   25.40   15.50
  17  11   2   31.50   10.50
  16 -12  -2   63.69   14.30
  16 -12  -2   59.19   24.00
  16  12  -2   50.89   21.10
 -16  12   2   70.19   14.60
  14 -12  -2   12.80   17.40
 -14 -12   2   34.90   10.90
 -14 -12   2   37.20   12.30
  14  12  -2   61.69   20.50
  14  12  -2   58.99   11.10
 -14  12   2   69.79   19.90
  12 -12  -2    9.40   15.70
 -12 -12   2   25.20   11.60
 -12 -12   2   46.30   13.90
  12  12  -2   39.50    9.30
 -12  12   2   24.80   10.00
 -10 -12   2   -1.40    6.60
  10 -12  -2   -6.00   13.30
 -10 -12   2   -6.00    8.40
 -10  12   2    4.60    6.80
  10  12  -2    0.50    5.50
   8 -12  -2  -12.40   11.60
  -8 -12   2    1.60    6.70
  -8 -12   2  -10.80    7.80
  -8  12   2    5.40    6.20
   8  12  -2   -8.80    5.10
   6 -12  -2   -1.30   13.20
  -6 -12   2    6.80    9.90
   6  12  -2   14.80    6.90
  -6  12   2    5.40    6.80
  -4 -12   2   50.29   15.00
   4 -12  -2   30.40   14.30
  -4  12   2   71.99   11.80
   4  12  -2   58.99   10.10
   2 -12  -2    0.50   11.10
  -2 -12   2   12.00   10.70
   2  12  -2   15.80    6.60
  -2  12   2   19.90    8.50
   0 -12   2  180.48   30.00
   0  12   2  190.68   21.70
   0  12  -2  223.68   21.30
   2 -12   2   50.19   16.00
  -2 -12  -2   28.40   14.10
   2  12   2   60.09   11.00
  -2  12  -2   63.19   10.80
  -4 -12  -2   36.70   14.80
   4 -12   2   49.00   17.00
  -4  12  -2   58.29   10.80
   4  12   2   80.69   12.40
   6 -12   2  -10.20   11.50
  -6 -12  -2   -1.80   10.40
  -6  12  -2    3.10    6.60
   6  12   2    4.90    6.70
  -8 -12  -2    0.40   10.40
   8 -12   2   -1.60   17.10
   8  12   2   -0.80    6.00
   8  12   2    1.30    5.90
  -8  12  -2   23.50    8.40
 -10 -12  -2   -2.90   20.00
  10 -12   2   -2.70   13.70
 -10  12  -2   -2.30    7.20
  10  12   2    6.00    6.50
  10  12   2    5.60    6.50
  10  12   2   -1.10   12.50
 -12 -12  -2   -1.70   10.40
  12 -12   2   -9.10   14.60
 -12  12  -2   -0.50    7.70
  12  12   2    4.80    7.80
  12  12   2    0.70   17.30
  14 -12   2   -8.90   14.90
  14  12   2    0.70   13.10
  14  12   2   -0.40    7.80
 -14  12  -2   -5.80    7.20
  13 -13  -2   32.30   18.20
 -13 -13   2   63.59   16.30
  13  13  -2   94.89   13.20
 -13  13   2   83.79   14.20
 -11 -13   2  249.68   34.50
 -11  13   2  311.57   38.60
  11  13  -2  288.87   27.90
  -9 -13   2  166.08   28.20
  -9  13   2  179.88   22.40
   9  13  -2  198.28   21.20
  -7 -13   2   53.99   16.90
   7  13  -2  116.69   14.80
  -7  13   2   77.99   13.60
   5 -13  -2    3.70   14.50
  -5 -13   2   -1.10    9.90
   5  13  -2   11.80    6.70
  -5  13   2   -1.00    6.70
  -3 -13   2   50.49   15.30
   3 -13  -2   44.40   17.70
  -3  13   2   72.89   13.10
   3  13  -2   71.39   11.40
   1 -13  -2  177.48   34.60
  -1 -13   2  195.28   32.80
  -1  13   2  267.47   25.40
   1  13  -2  270.97   24.50
   1 -13   2  160.98   31.40
  -1  13  -2  184.38   20.80
   1  13   2  209.98   22.00
  -3 -13  -2   28.40   15.90
   3 -13   2   28.60   15.10
   3  13   2   29.60    9.00
  -3  13  -2   32.60    9.30
   5 -13   2   14.20   14.80
  -5 -13  -2   20.50   13.90
   5  13   2   40.00    9.80
  -5  13  -2   51.49   10.70
  -7 -13  -2  -15.30   11.30
   7 -13   2   12.00   14.30
  -7  13  -2   -3.20    7.60
   7  13   2    6.10    8.10
   9 -13   2    7.40   15.30
  -9 -13  -2    6.20   12.20
  -9  13  -2   36.00    9.90
   9  13   2   42.50   10.70
  11 -13   2   12.40   18.20
 -11 -13  -2   -6.70   11.20
 -11  13  -2   43.10   11.30
  11  13   2    2.40    7.40
  11  13   2   21.10    8.50
 -10 -14   2  301.47   41.80
  10  14  -2  412.06   35.20
 -10  14   2  378.76   36.70
  -8 -14   2  155.58   29.80
   8  14  -2  198.68   21.50
  -8  14   2  162.28   22.80
   6 -14  -2    0.40   15.80
  -6 -14   2    8.70   13.90
  -6  14   2   33.40   11.90
   6  14  -2   48.30   10.60
   4 -14  -2   53.29   20.80
  -4 -14   2   63.59   18.00
  -4  14   2  109.39   15.40
  -2 -14   2   50.49   17.30
   2 -14  -2   26.90   17.50
  -2  14   2   99.29   15.20
   0 -14   2  392.66   52.19
   0  14  -2  422.16   37.50
   0  14   2  386.86   38.00
  -2 -14  -2  272.67   43.20
   2 -14   2  290.27   43.70
   2  14   2  415.06   34.30
  -2  14  -2  354.86   32.90
   4 -14   2  257.97   42.00
  -4 -14  -2  246.68   38.90
  -4  14  -2  330.77   29.50
  -6 -14  -2   32.40   16.20
   6 -14   2   30.80   19.20
  -6  14  -2   42.90   10.60
   6  14   2   57.09   11.30
  -8 -14  -2  -14.30   12.50
   8 -14   2   -8.50   15.80
  -8  14  -2    0.50    7.50
   8  14   2    8.40    7.90
   5 -15  -2  -16.90   14.50
  -5 -15   2    2.00   14.50
   3 -15  -2  -16.50   14.60
  -3 -15   2    5.80   13.60
   3  15  -2   36.60   11.00
  -3  15   2    5.50    8.30
   1 -15  -2   25.80   18.40
  -1 -15   2   33.70   17.30
  -1  15   2   65.19   13.10
   1  15  -2   78.29   13.30
  -1 -15  -2   12.00   16.70
   1 -15   2   27.10   16.90
   1  15   2   41.40   11.20
  -1  15  -2   31.30   10.50
  28   0  -3    5.20   13.40
  26   0  -3  -15.70   10.90
 -26   0   3  -11.20    4.20
  24   0  -3   -4.40   11.40
 -24   0   3   -2.70    4.10
 -24   0   3  -16.70   11.30
 -22   0   3    3.80    3.90
  22   0  -3    0.10   10.70
 -22   0   3   -3.80   11.10
 -20   0   3   -7.10    9.30
  20   0  -3    1.80    9.20
 -20   0   3   -0.70    3.60
 -18   0   3   -3.50    8.60
  18   0  -3   -0.40    7.70
 -18   0   3   -2.00    3.10
 -16   0   3   -8.50    6.30
 -16   0   3    1.30    5.30
  16   0  -3   -5.10    3.40
 -16   0   3   -4.90    2.90
  16   0  -3   -7.10    6.50
 -14   0   3    0.70    4.30
 -14   0   3   -3.10    2.40
 -14   0   3   -1.20    5.60
  14   0  -3   -3.90    5.50
  14   0  -3   -2.20    3.00
 -12   0   3    0.00    2.30
 -12   0   3   -2.20    3.90
  12   0  -3   -0.10    2.70
  12   0  -3   -1.50    4.70
 -10   0   3   -0.30    2.00
  10   0  -3    0.50    1.80
  10   0  -3   -1.60    2.10
  10   0  -3    1.20    3.80
 -10   0   3    0.30    3.00
   8   0  -3    0.20    1.70
   8   0  -3    0.60    1.60
   8   0  -3   -1.90    3.10
  -8   0   3    1.20    1.90
  -6   0   3    2.10    3.40
   6   0  -3    0.20    1.80
   6   0  -3    2.70    3.40
  -6   0   3    0.30    1.90
   6   0  -3   -0.50    1.50
  -6   0   3   -0.80    1.90
  -4   0   3    3.80    1.70
  -4   0   3    9.60    2.60
  -4   0   3    3.00    1.30
   4   0  -3    1.70    1.20
   4   0  -3    9.90    3.00
   4   0  -3    4.10    1.40
  -2   0   3    1.70    0.80
   2   0  -3    0.70    0.70
  -2   0   3    0.20    1.10
   0   0   3    0.90    0.90
   2   0   3   -1.50    1.80
  -2   0  -3   -0.50    1.40
   2   0   3   -0.60    1.30
  -4   0  -3   -2.60    1.60
   4   0   3    0.90    2.00
   4   0   3   -1.30    2.60
   6   0   3   -1.10    2.40
   6   0   3    1.60    3.10
  -6   0  -3   -2.10    1.90
  -6   0  -3    3.60    3.20
   8   0   3    6.10    4.70
   8   0   3    1.70    3.70
  -8   0  -3    1.40    2.80
  -8   0  -3    4.10    4.20
 -10   0  -3   -1.00    4.10
 -10   0  -3    2.30    3.00
  10   0   3    2.10    4.10
  10   0   3    3.90    4.50
  12   0   3    3.60    4.60
 -12   0  -3   -2.90    4.10
  14   0   3   -3.00    6.30
 -14   0  -3   -4.00    3.80
 -16   0  -3   -7.90    4.50
  16   0   3   -0.50    8.40
 -18   0  -3   -2.30    5.10
  18   0   3   -0.50    7.40
  20   0   3    6.80   10.40
  22   0   3   -8.90   10.80
  24   0   3  -13.40   10.50
 -27  -1   3  -26.20   13.00
 -27  -1   3   -1.80    5.30
  27  -1  -3    5.00   12.90
  27   1  -3    5.10   13.20
  25  -1  -3  180.38   29.00
 -25  -1   3  217.58   19.00
 -25  -1   3  181.78   30.60
 -25   1   3  200.18   18.00
  25   1  -3  145.69   29.80
  23  -1  -3   68.39   16.00
 -23  -1   3   44.60   22.90
 -23   1   3   53.89   15.60
  23   1  -3   38.60   15.10
 -21  -1   3    0.90    4.10
  21  -1  -3   -7.60    9.30
 -21  -1   3   -1.10   10.10
  21   1  -3    5.60   10.40
 -21   1   3    4.60    3.70
 -21   1   3   -6.10   10.20
 -19  -1   3  672.63   67.69
 -19  -1   3  790.52   61.09
  19  -1  -3  825.62   66.99
 -19   1   3  791.42   61.09
 -19   1   3  760.22   69.79
  19   1  -3  743.83   67.39
  17  -1  -3  679.23   56.39
 -17  -1   3  532.75   56.99
 -17  -1   3  777.02   56.79
 -17  -1   3  672.23   51.69
  17   1  -3  616.54   56.89
 -17   1   3  637.74   58.89
 -17   1   3  688.23   51.79
  17   1  -3  600.44   52.99
  17   1  -3  580.14   52.09
 -17   1   3  678.23   54.99
  15  -1  -3 2218.98  156.98
 -15  -1   3 2110.89  153.38
  15  -1  -3 1861.91  154.08
 -15   1   3 1837.82  158.58
  15   1  -3 1755.62  153.48
  15   1  -3 1802.72  154.08
 -15   1   3 1969.40  153.28
 -15   1   3 2172.98  155.98
  15   1  -3 2013.20  157.48
 -13  -1   3 1573.34  116.19
 -13  -1   3 1706.63  119.49
  13  -1  -3 1411.76  116.69
  13  -1  -3 1554.84  118.69
  13   1  -3 1387.46  116.59
 -13   1   3 1683.33  118.29
  13   1  -3 1333.27  116.29
  13   1  -3 1510.05  119.59
 -13   1   3 1446.56  116.19
 -13   1   3 1292.37  120.39
 -11  -1   3  513.75   39.60
  11  -1  -3  510.85   41.50
 -11  -1   3  586.14   42.60
  11  -1  -3  487.55   39.90
  11   1  -3  501.35   42.70
  11   1  -3  458.95   39.70
 -11   1   3  420.26   43.70
  11   1  -3  451.15   39.60
 -11   1   3  442.16   39.50
 -11   1   3  559.54   41.10
   9  -1  -3  165.48   14.90
  -9  -1   3  214.48   17.60
   9  -1  -3  173.78   16.10
  -9  -1   3  173.38   14.80
  -9   1   3  168.78   15.00
   9   1  -3  176.88   14.90
  -9   1   3  192.48   15.80
  -9   1   3  154.48   14.80
   9   1  -3  162.98   17.30
   9   1  -3  136.49   14.60
   7  -1  -3 1135.89   88.19
   7  -1  -3 1212.88   88.69
  -7  -1   3 1123.59   88.09
  -7   1   3  968.30   88.09
   7   1  -3 1055.29   88.29
  -7   1   3 1144.49   88.19
   7   1  -3 1116.09   87.89
  -7   1   3 1266.17   88.49
   7   1  -3 1138.89   90.09
  -5  -1   3 1499.55  120.39
  -5  -1   3 1495.95  119.19
   5  -1  -3 1502.05  118.99
   5  -1  -3 1714.03  119.19
   5   1  -3 1436.56  120.49
   5   1  -3 1551.64  118.69
  -5   1   3 1635.84  118.99
   5   1  -3 1447.76  119.19
  -5   1   3 1518.25  118.99
  -3  -1   3 2062.59  179.58
  -3  -1   3 2410.46  178.78
   3  -1  -3 2435.66  178.58
  -3   1   3 2350.36  178.58
   3   1  -3 2498.35  178.08
   3   1  -3 2290.17  178.78
   3   1  -3 2117.39  180.28
  -1  -1   3  645.04   57.19
   1  -1  -3  758.12   56.09
  -1  -1   3  710.93   56.49
   1   1  -3  703.53   56.19
  -1   1   3  774.92   55.79
   1  -1   3  969.20   74.29
  -1  -1  -3 1076.59   74.79
   1  -1   3  917.51   75.49
  -1   1  -3  919.21   74.29
  -1   1  -3  829.12   75.39
   1   1   3 1034.00   74.79
   3  -1   3  133.19   10.50
  -3  -1  -3  147.79   12.30
   3   1   3  152.98   12.40
  -3   1  -3  107.79   10.50
   3   1   3  112.49   11.00
  -3   1  -3  137.09   12.60
   5  -1   3 2594.24  203.38
  -5  -1  -3 2751.02  203.28
   5  -1   3 2430.76  202.98
   5   1   3 2579.84  203.28
  -5   1  -3 2708.23  203.38
   7  -1   3  836.32   65.59
   7  -1   3  741.43   64.89
  -7  -1  -3  826.42   65.29
  -7   1  -3  883.71   65.39
   7   1   3  738.93   65.19
   7   1   3  816.22   62.89
   9  -1   3 2238.48  177.08
   9  -1   3 2130.89  177.18
  -9  -1  -3 2402.06  177.48
   9   1   3 2306.67  177.48
   9   1   3 2113.89  173.98
  -9   1  -3 2360.36  176.78
 -11  -1  -3 1665.23  126.09
  11  -1   3 1469.15  123.99
  11   1   3 1491.85  124.39
 -11   1  -3 1609.84  123.59
  13  -1   3  474.65   44.30
 -13  -1  -3  530.35   44.80
 -13  -1  -3  518.45   41.30
 -13   1  -3  523.15   43.60
  13   1   3  472.55   44.90
  15  -1   3  152.28   19.10
 -15  -1  -3  142.29   14.10
 -15   1  -3  130.89   16.80
  15   1   3  128.19   19.60
  17  -1   3    9.70    8.90
 -17  -1  -3   16.50    7.50
  17   1   3   19.00   10.60
 -17   1  -3   11.10    6.50
  19  -1   3   93.69   16.70
  19   1   3  120.39   21.10
 -19   1  -3  115.49   17.20
  21  -1   3  171.08   24.80
 -21   1  -3  150.38   20.90
  21   1   3  169.58   26.60
  23  -1   3   -1.50   11.60
  23   1   3  -13.00   11.40
  25  -1   3   10.10   12.40
  25   1   3  -10.10   12.90
 -28  -2   3   -7.60    5.60
  28  -2  -3   -2.10   12.70
  28   2  -3   -7.60   13.80
  26  -2  -3  177.58   28.90
 -26  -2   3  209.68   19.10
  26   2  -3  125.89   26.00
 -26   2   3  196.38   17.20
 -24  -2   3   77.79   17.80
  24  -2  -3  101.99   20.20
 -24  -2   3  120.29   13.20
  24   2  -3   72.09   18.60
 -24   2   3  123.49   11.70
 -22  -2   3   14.10    5.20
  22  -2  -3    3.10   11.20
 -22  -2   3    2.10   11.60
  22   2  -3    2.10   11.60
 -22   2   3   18.10    4.60
  20  -2  -3  239.78   27.60
 -20  -2   3  212.98   29.40
 -20  -2   3  247.78   21.00
  20   2  -3  165.88   28.20
  20   2  -3  200.58   21.00
 -20   2   3  238.28   31.60
 -20   2   3  265.97   20.60
  18  -2  -3 1689.13  124.29
 -18  -2   3 1621.04  119.69
 -18  -2   3 1286.37  124.19
 -18   2   3 1597.64  128.29
  18   2  -3 1361.36  124.89
 -18   2   3 1578.64  119.69
  18   2  -3 1358.76  119.99
 -18   2   3 1743.93  123.79
  16  -2  -3 2161.38  182.18
  16  -2  -3 2402.76  184.48
 -16  -2   3 2534.85  181.38
 -16  -2   3 2619.34  185.98
  16   2  -3 2084.29  181.48
 -16   2   3 2204.38  181.28
  16   2  -3 2216.88  185.98
 -16   2   3 2357.26  187.78
 -16   2   3 2426.76  185.68
  14  -2  -3 2918.81  264.97
  14  -2  -3 3835.72  265.47
 -14  -2   3 3639.14  262.77
  14   2  -3 3158.18  262.87
 -14   2   3 3251.17  267.97
 -14   2   3 3832.22  264.77
 -14   2   3 3216.88  262.77
  14   2  -3 3273.37  266.67
  12  -2  -3 2859.01  217.68
  12  -2  -3 3034.70  218.98
 -12  -2   3 2908.01  217.08
 -12   2   3 2581.54  221.48
  12   2  -3 2663.23  220.48
 -12   2   3 3081.89  218.38
 -12   2   3 2936.51  217.88
 -12   2   3 2472.35  217.08
  12   2  -3 2662.53  217.18
  10  -2  -3  822.22   67.29
  10  -2  -3  939.51   68.29
 -10  -2   3  985.80   70.49
 -10  -2   3  871.81   66.99
  10   2  -3  813.22   70.29
 -10   2   3  841.62   67.39
  10   2  -3  758.72   66.89
 -10   2   3  721.03   70.79
 -10   2   3  897.71   67.69
   8  -2  -3  157.18   14.90
   8  -2  -3  180.68   15.50
  -8  -2   3  181.18   14.90
  -8  -2   3  187.78   17.90
  -8   2   3  136.49   18.50
   8   2  -3  164.68   14.80
  -8   2   3  188.58   15.20
  -8   2   3  177.98   15.10
   8   2  -3  156.38   18.00
   6  -2  -3 9228.18  697.73
  -6  -2   3 9722.53  697.73
  -6  -2   3 9281.37  699.73
  -6   2   3 9485.15  697.83
   6   2  -3 9178.08  697.73
   6   2  -3 8660.33  699.93
  -6   2   3 7838.32  700.03
   4  -2  -3  949.21   63.49
  -4  -2   3  783.02   65.89
  -4  -2   3  873.11   64.09
   4  -2  -3  838.82   63.99
  -4  -2   3  710.73   65.29
   4   2  -3  852.41   64.09
   4   2  -3  790.22   66.19
  -4   2   3  687.23   66.19
  -4   2   3  848.02   64.09
  -2  -2   3 4871.31  395.26
  -2  -2   3 5364.86  393.86
   2  -2  -3 5397.46  393.96
  -2   2   3 5426.06  394.06
   2   2  -3 4405.66  395.06
   2   2  -3 5196.28  393.96
   0  -2  -3   17.00    2.70
   0  -2  -3   25.90    3.60
   0  -2   3   20.10    3.90
   0  -2   3   15.40    2.50
   0   2   3   17.00    3.30
   0   2   3   14.70    2.70
   0   2  -3   20.00    2.90
   0   2  -3   18.70    3.90
   2  -2   3  271.87   22.80
   2  -2   3  285.87   25.00
  -2  -2  -3  319.87   24.20
   2   2   3  310.27   24.40
  -2   2  -3  269.57   24.90
  -2   2  -3  271.87   22.90
   4  -2   3 2268.47  182.48
   4  -2   3 2276.57  182.08
   4  -2   3 2526.75  184.78
  -4  -2  -3 2402.36  183.78
  -4   2  -3 2514.35  184.88
  -4   2  -3 2244.08  182.08
   4   2   3 2298.87  183.78
  -6  -2  -3 3444.46  266.07
   6  -2   3 3231.08  264.57
   6  -2   3 3557.04  266.97
  -6   2  -3 3718.03  266.87
   6   2   3 3267.67  264.17
   6   2   3 3318.67  266.07
   8  -2   3 6209.88  501.45
   8  -2   3 6097.19  500.15
   8  -2   3 6326.27  502.65
  -8  -2  -3 7048.09  502.25
   8   2   3 6296.97  502.05
  -8   2  -3 6940.51  502.45
   8   2   3 6456.65  499.35
  10  -2   3 1641.74  142.39
 -10  -2  -3 1966.40  142.29
  10  -2   3 1745.13  141.39
  10  -2   3 1723.93  139.79
  10   2   3 1848.92  142.29
 -10   2  -3 1909.51  142.19
  10   2   3 1703.53  138.49
 -12  -2  -3 1713.93  120.19
  12  -2   3 1285.67  117.69
  12  -2   3 1549.94  119.19
  12  -2   3 1341.17  119.79
 -12   2  -3 1647.24  119.59
  12   2   3 1438.16  122.19
  12   2   3 1435.06  115.19
  14  -2   3  779.32   64.59
  14  -2   3  725.23   61.99
  14   2   3  728.53   59.69
 -14   2  -3  811.92   64.69
  14   2   3  774.72   65.69
  16  -2   3   44.10   12.40
  16  -2   3   67.69   13.60
 -16   2  -3   78.09   14.00
  16   2   3   76.89   16.50
  18  -2   3  199.38   25.00
  18   2   3  198.08   27.00
 -18   2  -3  208.08   24.10
  20  -2   3   80.39   16.00
  20   2   3   90.99   20.30
 -20   2  -3  118.59   20.60
  22  -2   3   -4.30    8.90
 -22   2  -3   -3.50    8.10
  22   2   3   17.60   13.60
  24  -2   3  -11.70   11.50
  24   2   3   -4.10   11.60
  27  -3  -3  -11.10   11.80
  27   3  -3    3.10   14.90
 -25  -3   3   -5.60    9.40
  25  -3  -3    2.80   11.60
  25   3  -3  -14.00   12.40
 -25   3   3   -6.10    3.90
 -23  -3   3   -1.40    5.40
  23  -3  -3   -3.30    8.90
 -23   3   3    1.00    3.80
  23   3  -3   -1.10    7.10
  23   3  -3   -4.60   11.80
  21  -3  -3  215.18   24.50
 -21  -3   3  194.58   17.70
 -21  -3   3  156.88   25.90
  21   3  -3  136.19   24.40
 -21   3   3  185.68   16.70
  21   3  -3  146.19   17.60
  19  -3  -3  275.27   29.00
 -19  -3   3  308.87   24.50
  19   3  -3  228.08   31.60
 -19   3   3  293.57   34.00
  19   3  -3  248.98   24.50
 -19   3   3  274.17   24.10
  17  -3  -3  964.50   75.79
 -17  -3   3  985.00   72.39
  17   3  -3  910.41   78.39
  17   3  -3  846.82   72.49
 -17   3   3  815.02   72.09
 -17   3   3  936.31   79.99
  15  -3  -3 1004.50   81.09
  15  -3  -3 1109.29   82.89
 -15  -3   3 1056.69   80.09
 -15   3   3  942.01   80.19
 -15   3   3 1046.20   87.09
  15   3  -3 1006.60   85.59
  15   3  -3  932.91   80.19
  13  -3  -3  367.16   29.10
 -13  -3   3  377.76   32.00
  13  -3  -3  335.57   29.00
 -13  -3   3  298.17   26.90
  13   3  -3  281.77   31.70
 -13   3   3  311.27   33.20
 -13   3   3  321.07   27.90
  13   3  -3  296.47   27.10
 -11  -3   3 2662.23  202.48
  11  -3  -3 2579.34  202.98
  11  -3  -3 2732.03  203.68
 -11  -3   3 2952.40  206.58
 -11   3   3 2515.85  202.98
  11   3  -3 2398.86  202.48
 -11   3   3 2450.95  207.08
   9  -3  -3   95.29   10.50
  -9  -3   3   99.89    9.90
   9  -3  -3   94.49   10.10
  -9  -3   3  115.39   14.70
  -9  -3   3   82.09   11.50
  -9   3   3  100.39   16.00
  -9   3   3   77.09   10.00
   9   3  -3  103.29   16.00
   9   3  -3  104.49   10.00
   7  -3  -3   72.69    7.30
  -7  -3   3   61.49    8.90
  -7  -3   3   68.09    7.20
   7  -3  -3   61.49    7.10
  -7  -3   3   80.59   11.40
  -7   3   3   58.69   11.60
   7   3  -3   59.39    7.00
  -7   3   3   64.09    7.50
   7   3  -3   56.79    9.90
   5  -3  -3  498.25   40.70
  -5  -3   3  474.05   43.20
  -5  -3   3  500.65   42.30
  -5  -3   3  548.35   40.80
  -5   3   3  529.15   40.90
   5   3  -3  532.15   40.80
   5   3  -3  500.75   43.80
  -5   3   3  486.55   43.80
  -3  -3   3 2193.48  161.68
   3  -3  -3 2094.69  161.68
  -3  -3   3 1848.42  163.68
  -3  -3   3 2147.29  163.38
  -3   3   3 2022.40  165.78
  -3   3   3 2174.08  161.88
   3   3  -3 1927.31  164.38
   3   3  -3 2123.89  161.68
   3   3  -3 2216.18  160.98
   1  -3  -3  476.65   37.50
   1  -3  -3  465.15   37.90
  -1  -3   3  490.75   37.30
  -1  -3   3  496.95   36.50
  -1  -3   3  533.65   39.50
   1   3  -3  471.25   36.50
  -1   3   3  398.36   37.70
  -1   3   3  405.46   39.10
   1   3  -3  471.15   39.40
   1  -3   3  558.84   43.20
   1  -3   3  561.84   45.50
   1  -3   3  521.85   42.70
  -1  -3  -3  634.64   44.50
  -1   3  -3  526.35   42.70
   1   3   3  492.65   44.30
   1   3   3  541.25   44.50
  -1   3  -3  550.64   43.20
  -1   3  -3  545.65   45.60
   3  -3   3  272.77   23.50
   3  -3   3  242.38   20.30
   3  -3   3  235.68   20.40
  -3   3  -3  266.77   23.40
   3   3   3  253.97   21.00
  -3   3  -3  250.07   20.30
   3   3   3  267.07   22.60
  -3   3  -3  230.38   20.30
   5  -3   3  886.41   75.19
   5  -3   3  913.81   75.49
   5  -3   3 1004.10   78.79
  -5  -3  -3 1041.70   77.59
  -5   3  -3 1064.09   78.79
  -5   3  -3  968.80   75.09
   5   3   3  933.11   77.59
   5   3   3  927.21   75.69
  -7  -3  -3 3052.39  215.58
   7  -3   3 2787.22  216.58
   7  -3   3 2543.65  213.08
  -7   3  -3 2638.64  212.08
  -7   3  -3 2903.91  216.18
   7   3   3 2646.64  215.38
   7   3   3 2695.63  212.88
   9  -3   3 1981.00  154.18
   9  -3   3 1754.12  150.08
  -9  -3  -3 2065.09  152.78
   9  -3   3 1831.72  151.58
   9   3   3 1938.51  149.59
  -9   3  -3 2051.69  153.28
   9   3   3 1865.51  152.78
  11  -3   3  898.91   72.09
  11  -3   3  867.01   76.19
  11   3   3  905.61   70.89
  11   3   3  861.11   75.09
 -11   3  -3  974.60   75.39
  13  -3   3  489.85   50.49
  13  -3   3  546.95   48.20
 -13  -3  -3  639.24   52.09
  13  -3   3  526.35   46.00
  13   3   3  602.74   50.49
 -13   3  -3  566.94   49.40
  15  -3   3  870.01   69.99
  15   3   3  791.12   71.29
 -15   3  -3  882.11   70.99
  15   3   3  770.22   64.99
  17  -3   3  136.09   19.40
 -17   3  -3  145.19   20.20
  17   3   3  123.09   12.80
  17   3   3  146.19   22.80
  19  -3   3   25.40   10.30
  19   3   3   13.60    4.30
 -19   3  -3   10.50    8.90
  19   3   3   12.10   11.50
  21   3   3   -8.90   22.00
  23  -3   3   24.50   13.60
  23   3   3   18.70   15.00
 -26  -4   3   78.29   17.20
 -26  -4   3  131.49   15.60
  26  -4  -3  107.59   20.60
 -26  -4   3  108.79   16.50
  26   4  -3   85.69   22.40
  26   4  -3  138.89   18.70
  24  -4  -3  158.78   24.60
 -24  -4   3  195.68   18.30
 -24  -4   3  158.08   19.60
 -24  -4   3  119.19   21.00
 -24   4   3  177.98   15.90
  24   4  -3  142.09   27.90
  24   4  -3  144.49   17.40
 -22  -4   3  105.59   13.20
 -22  -4   3   73.79   15.90
  22  -4  -3  106.09   18.40
 -22  -4   3  107.19   14.90
  22   4  -3   71.69   11.30
 -22   4   3  104.49   11.70
  22   4  -3   90.59   21.50
 -20  -4   3   59.49   11.70
 -20  -4   3   54.69    8.80
  20  -4  -3   69.19   14.20
  20   4  -3   44.90    8.20
  20   4  -3   64.29   17.70
 -20   4   3   55.79    7.90
 -18  -4   3   66.59   12.30
 -18  -4   3   97.49   11.40
  18  -4  -3  100.79   15.40
 -18   4   3   78.59   10.40
  18   4  -3   85.69   19.10
  18   4  -3   64.19   10.60
  16  -4  -3    0.20    7.00
 -16  -4   3    2.60    4.40
 -16  -4   3    5.80    4.10
 -16   4   3    4.80    5.00
 -16   4   3    2.40    7.90
  16   4  -3   -0.70    9.20
  16   4  -3    2.00    3.60
  14  -4  -3    7.60    5.90
 -14  -4   3    9.10    4.10
  14  -4  -3   -0.70    3.60
 -14  -4   3    2.10    4.10
 -14  -4   3    9.30    7.40
 -14   4   3    4.30    7.50
  14   4  -3    6.10    8.80
 -14   4   3    5.10    4.10
  14   4  -3    1.30    3.10
  12  -4  -3  109.69   12.00
 -12  -4   3   80.99   11.80
 -12  -4   3  106.09   15.60
  12  -4  -3   92.19   10.70
 -12  -4   3   98.09   10.60
 -12   4   3  104.29   11.10
  12   4  -3   62.09   12.80
  12   4  -3   85.89   10.20
 -12   4   3  114.99   17.50
 -10  -4   3  151.78   18.20
 -10  -4   3  122.59   14.40
  10  -4  -3  136.09   13.50
  10  -4  -3  122.09   12.80
  10  -4  -3   95.59   19.10
 -10  -4   3  147.59   13.10
 -10   4   3  135.99   18.80
  10   4  -3  116.19   12.50
 -10   4   3  139.69   13.40
  10   4  -3  131.49   19.10
  -8  -4   3 2230.08  184.38
   8  -4  -3 2322.87  182.98
   8  -4  -3 2470.55  182.98
  -8  -4   3 2435.96  186.58
  -8  -4   3 2534.85  182.98
  -8   4   3 2376.96  183.28
  -8   4   3 2288.67  186.98
   8   4  -3 2209.58  186.88
   8   4  -3 2302.77  182.88
  -6  -4   3 1971.70  146.09
  -6  -4   3 1881.81  147.69
   6  -4  -3 1832.62  146.09
  -6  -4   3 1802.52  149.09
   6   4  -3 1954.60  146.19
   6   4  -3 1683.23  149.29
  -6   4   3 1973.90  146.39
  -6   4   3 1887.71  149.69
  -4  -4   3 3356.76  289.67
   4  -4  -3 3728.83  287.17
  -4  -4   3 3943.81  289.07
  -4  -4   3 3866.11  287.17
   4   4  -3 3822.22  286.47
   4   4  -3 3477.55  288.97
  -4   4   3 3612.24  289.97
   4   4  -3 3776.92  287.27
  -4   4   3 3820.42  287.37
   2  -4  -3 3194.28  276.27
  -2  -4   3 3086.49  277.97
  -2  -4   3 3813.82  277.87
   2  -4  -3 3577.54  275.87
  -2  -4   3 3668.53  275.77
  -2   4   3 3878.11  276.17
   2   4  -3 3730.23  275.87
   2   4  -3 3574.54  275.27
   2   4  -3 3553.24  278.07
  -2   4   3 3575.94  278.17
   0  -4   3 3019.80  222.48
   0  -4   3 2747.63  219.28
   0  -4   3 2851.21  219.98
   0  -4  -3 2858.01  221.18
   0  -4  -3 2876.71  220.38
   0   4  -3 2992.40  222.88
   0   4   3 2886.11  220.38
   0   4  -3 2774.92  219.38
   0   4  -3 2899.51  220.08
   0   4   3 2865.61  221.98
   0   4   3 2504.25  220.98
   2  -4   3 1064.09   82.09
   2  -4   3 1000.60   81.49
   2  -4   3 1113.79   85.09
   2   4   3  957.20   82.29
  -2   4  -3 1137.49   85.29
  -2   4  -3 1016.20   81.59
   2   4   3 1033.30   82.39
   2   4   3  966.30   83.79
   2   4   3 1111.09   83.19
  -2   4  -3 1079.49   81.99
   4  -4   3  270.57   25.90
   4  -4   3  241.48   21.40
   4  -4   3  234.88   21.70
   4   4   3  289.47   22.20
   4   4   3  246.68   22.20
  -4   4  -3  272.37   25.30
  -4   4  -3  240.28   21.50
  -4   4  -3  272.17   22.30
   4   4   3  254.87   22.20
   4   4   3  288.07   25.30
   6  -4   3  252.37   25.50
   6  -4   3  243.38   20.60
  -6   4  -3  244.88   20.10
   6   4   3  239.58   20.80
   6   4   3  231.68   24.00
  -6   4  -3  236.38   24.10
  -8  -4  -3  451.65   35.60
   8  -4   3  376.56   32.10
   8  -4   3  385.76   37.30
   8   4   3  375.76   31.90
   8   4   3  355.76   35.30
  -8   4  -3  386.46   31.10
  -8   4  -3  399.16   35.90
  10  -4   3   87.09   13.40
  10  -4   3   82.09   14.80
  10  -4   3   76.29    9.70
 -10   4  -3   88.39    8.00
 -10   4  -3   87.69   14.20
  10   4   3   96.09   14.80
  10   4   3   85.99    9.50
  12  -4   3  174.28   16.50
  12  -4   3  134.69   22.80
  12  -4   3  165.58   18.80
 -12  -4  -3  162.88   19.90
  12   4   3  145.69   21.10
  12   4   3  168.88   15.20
 -12   4  -3  177.28   21.10
  14  -4   3   13.10    9.60
  14  -4   3    6.30    6.00
  14   4   3   11.50    3.90
 -14   4  -3    4.70    6.70
  14   4   3   11.80   11.00
  16  -4   3  304.57   29.70
  16  -4   3  243.58   33.60
  16   4   3  277.17   24.10
 -16   4  -3  311.57   31.70
  16   4   3  261.17   32.20
  18  -4   3  158.28   28.50
  18  -4   3  229.18   25.50
  18   4   3  222.98   28.70
  18   4   3  215.18   18.80
  20  -4   3  651.23   56.89
  20   4   3  610.34   59.19
  20   4   3  594.64   49.70
  22  -4   3  160.78   23.30
  22   4   3  125.99   13.80
  22   4   3  118.09   21.30
  24   4   3  102.69   21.60
 -25  -5   3  404.66   36.60
 -25  -5   3  416.36   36.40
 -25  -5   3  346.87   40.70
  25  -5  -3  525.15   54.59
  25   5  -3  362.56   45.90
 -25   5   3  425.76   34.20
 -23  -5   3  299.37   39.10
 -23  -5   3  366.76   35.10
  23  -5  -3  419.96   39.70
 -23  -5   3  442.66   34.80
 -23   5   3  407.26   33.00
  21  -5  -3   96.19   17.30
 -21  -5   3   87.59   11.90
 -21  -5   3   93.99   13.90
 -21   5   3   77.99   11.00
  21   5  -3   66.69   20.00
  21   5  -3   62.69   11.40
 -19  -5   3    2.90    5.00
 -19  -5   3    1.10    5.00
  19  -5  -3   -4.00    6.50
 -19   5   3    1.60    3.90
  19   5  -3   -8.80    4.00
  19   5  -3  -14.10    9.90
 -17  -5   3   84.99   16.70
  17  -5  -3   68.99   12.00
 -17  -5   3   76.29   12.20
 -17   5   3   64.89   11.40
  17   5  -3   53.29    9.00
  17   5  -3   56.09   16.40
  15  -5  -3  215.78   21.00
 -15  -5   3  175.98   20.20
 -15  -5   3  200.38   19.00
 -15   5   3  226.78   27.50
  15   5  -3  191.68   21.40
 -15   5   3  203.68   19.90
  15   5  -3  169.48   27.30
  13  -5  -3  331.77   29.50
  13  -5  -3  355.66   30.50
 -13  -5   3  364.56   29.50
 -13  -5   3  333.17   30.90
 -13  -5   3  368.36   35.00
  13   5  -3  320.57   29.20
  13   5  -3  270.07   34.90
 -13   5   3  357.46   35.80
 -13   5   3  360.56   30.20
  11  -5  -3   52.89    8.00
  11  -5  -3   26.00    9.30
 -11  -5   3   40.50    6.20
 -11  -5   3   31.70    6.90
  11   5  -3   35.60   12.40
  11   5  -3   28.70    5.60
 -11   5   3   39.00   11.10
 -11   5   3   51.09    8.10
  -9  -5   3  591.64   52.09
  -9  -5   3  574.74   49.20
   9  -5  -3  578.04   47.70
  -9  -5   3  625.44   47.80
  -9   5   3  587.94   48.10
  -9   5   3  604.54   52.69
   9   5  -3  597.24   47.80
   9   5  -3  532.25   52.69
  -7  -5   3 4590.44  334.87
  -7  -5   3 4475.55  336.57
   7  -5  -3 4165.58  334.67
  -7  -5   3 3966.50  338.07
  -7   5   3 4576.54  339.17
   7   5  -3 4397.76  334.97
  -7   5   3 4501.85  335.17
   7   5  -3 3902.31  338.77
  -5  -5   3 6156.18  441.66
   5  -5  -3 5530.85  439.46
  -5  -5   3 5158.48  442.56
  -5  -5   3 6205.48  439.76
   5   5  -3 5265.87  443.16
   5   5  -3 5949.00  439.76
  -5   5   3 5843.12  443.16
  -5   5   3 5933.81  439.86
   5   5  -3 5099.59  441.46
   5   5  -3 5734.23  438.86
  -3  -5   3 5231.18  471.75
  -3  -5   3 6737.43  471.65
   3  -5  -3 5965.10  469.05
  -3  -5   3 6210.08  469.25
   3  -5  -3 5382.06  469.85
   3   5  -3 6176.08  468.45
   3   5  -3 6055.59  471.75
   3   5  -3 6380.36  469.35
  -3   5   3 6304.87  469.45
  -3   5   3 6311.57  472.25
   1  -5  -3 4298.37  365.26
  -1  -5   3 4700.33  363.26
   1  -5  -3 4538.55  363.26
  -1  -5   3 4715.53  362.46
  -1  -5   3 5107.49  366.06
  -1   5   3 4699.93  363.56
  -1   5   3 4904.21  365.66
   1   5  -3 4838.02  363.36
   1   5  -3 4498.55  362.46
   1  -5   3 5803.22  422.06
  -1  -5  -3 5627.04  419.26
   1  -5   3 5141.49  417.96
  -1  -5  -3 5625.44  420.66
   1  -5   3 5326.27  418.76
   1   5   3 5389.16  419.06
   1   5   3 4994.00  418.96
  -1   5  -3 5638.14  418.86
   1   5   3 5869.11  420.66
  -1   5  -3 5280.57  418.16
   1   5   3 4606.04  420.26
  -1   5  -3 5782.12  422.26
   3  -5   3  241.18   21.50
   3  -5   3  283.77   26.90
  -3  -5  -3  286.87   25.50
   3  -5   3  236.78   22.30
  -3   5  -3  273.17   22.20
  -3   5  -3  288.37   26.30
   3   5   3  244.18   22.70
   3   5   3  221.58   25.20
   3   5   3  246.18   22.50
   3   5   3  306.27   23.70
  -3   5  -3  248.68   21.80
  -5  -5  -3   19.80    7.90
   5  -5   3    8.20    5.70
   5  -5   3   16.10    4.00
  -5  -5  -3   10.10    5.00
   5  -5   3   12.30    3.90
  -5   5  -3   10.40    3.40
   5   5   3    7.80    3.60
   5   5   3   13.30    8.40
   5   5   3   16.60    4.60
  -5   5  -3   14.80    3.80
  -5   5  -3    6.20    5.00
   5   5   3   12.50    3.60
  -7  -5  -3  303.77   26.80
   7  -5   3  255.07   28.20
   7  -5   3  242.88   22.50
  -7   5  -3  256.07   22.80
  -7   5  -3  276.67   22.30
   7   5   3  208.38   26.30
   7   5   3  297.97   23.30
  -7   5  -3  288.87   27.30
   9  -5   3  106.59   11.60
   9  -5   3   96.09   18.30
  -9  -5  -3  144.29   18.00
   9   5   3  121.99   11.80
  -9   5  -3  119.49   10.70
   9   5   3   76.09   14.50
  -9   5  -3  110.39   16.10
  11  -5   3    1.60    9.50
 -11  -5  -3   13.20    9.00
  11  -5   3   16.60    6.50
  11  -5   3   13.10    5.60
  11   5   3    1.30    8.00
  11   5   3   15.50    4.20
 -11   5  -3   20.40    7.50
  13  -5   3   -0.20    4.60
  13  -5   3    3.90    8.20
  13  -5   3    9.00    6.40
 -13   5  -3    7.40    6.60
  13   5   3   10.50   10.00
  13   5   3    9.10    3.60
  15  -5   3  220.88   24.00
  15  -5   3  178.98   29.10
  15   5   3  193.58   27.80
  15   5   3  234.78   19.80
  17  -5   3  607.74   51.09
  17  -5   3  496.75   54.99
  17   5   3  500.05   53.49
  17   5   3  606.34   46.00
  19  -5   3  711.83   78.59
  19  -5   3  962.40   76.39
  19   5   3  937.71   70.09
  19   5   3  880.11   78.99
  21  -5   3  586.54   52.19
  21   5   3  517.95   55.09
  21   5   3  535.25   45.20
  23  -5   3  351.56   37.20
  23   5   3  342.07   41.80
  23   5   3  313.57   28.90
 -26  -6   3  231.08   24.70
  26  -6  -3  237.08   30.50
  26   6  -3  163.58   31.70
 -26   6   3  247.98   21.40
 -24  -6   3  283.37   27.20
  24  -6  -3  308.67   32.00
 -24  -6   3  233.58   31.20
 -24   6   3  272.57   24.50
  24   6  -3  239.18   36.10
 -22  -6   3  297.37   28.90
  22  -6  -3  308.07   32.60
 -22  -6   3  324.37   29.20
 -22   6   3  287.17   27.20
 -20  -6   3   -3.80    4.70
  20  -6  -3   -0.70    8.70
 -20  -6   3   -7.20    5.50
  20   6  -3   -3.10   11.40
 -20   6   3   -7.90    4.10
 -18  -6   3    6.70    5.50
 -18  -6   3    9.10    5.50
  18  -6  -3   15.80    8.30
  18   6  -3    2.40   10.60
 -18   6   3    4.20    6.60
 -16  -6   3   79.99   11.70
  16  -6  -3   74.89   12.50
 -16  -6   3   92.99   13.10
  16   6  -3   68.49   16.80
  16   6  -3   65.89   10.20
 -16   6   3   69.99   11.10
 -14  -6   3   76.19   11.00
 -14  -6   3   84.19   12.10
  14  -6  -3   70.39   11.60
 -14   6   3   85.39   12.20
  14   6  -3   60.19    9.20
  14   6  -3   80.59   18.00
 -12  -6   3   73.79    9.80
  12  -6  -3   60.79    9.50
  12  -6  -3   61.89    8.50
  12  -6  -3   34.90   12.80
 -12  -6   3   52.99   11.80
 -12   6   3   40.60   11.50
  12   6  -3   45.90    7.60
 -12   6   3   45.10    7.70
  12   6  -3   39.10   13.30
 -10  -6   3   93.29   10.90
 -10  -6   3   96.39   12.30
  10  -6  -3   85.69   10.00
 -10  -6   3   73.39   13.40
  10  -6  -3   67.09   18.80
  10   6  -3   58.69   17.90
 -10   6   3   77.19   14.80
 -10   6   3   87.69   10.90
  -8  -6   3  637.84   56.39
  -8  -6   3  699.13   54.09
   8  -6  -3  626.74   51.69
  -8  -6   3  687.03   52.19
  -8   6   3  697.23   52.49
   8   6  -3  517.25   53.29
  -8   6   3  689.13   57.29
   8   6  -3  559.24   56.79
   8   6  -3  639.14   52.09
   6  -6  -3 3179.08  255.87
  -6  -6   3 3461.45  256.27
  -6  -6   3 3704.33  258.57
  -6  -6   3 2925.01  259.47
   6   6  -3 3328.77  255.37
   6   6  -3 3388.26  256.37
  -6   6   3 3454.55  256.57
  -6   6   3 3530.25  260.57
   6   6  -3 2939.61  258.27
   6   6  -3 3051.39  260.57
   4  -6  -3 4102.79  346.07
  -4  -6   3 4480.85  346.47
  -4  -6   3 4948.00  349.17
  -4  -6   3 3792.02  349.37
   4   6  -3 4504.75  345.57
  -4   6   3 4574.04  346.77
   4   6  -3 4724.73  346.67
  -4   6   3 4825.82  350.26
   4   6  -3 4302.87  349.17
   2  -6  -3 3809.72  340.67
   2  -6  -3 4189.68  339.37
  -2  -6   3 4841.52  342.67
  -2  -6   3 4510.45  338.77
  -2  -6   3 4388.56  339.67
  -2  -6   3 3652.13  342.17
  -2   6   3 3999.20  339.57
   2   6  -3 4544.75  342.97
  -2   6   3 4941.51  342.97
   2   6  -3 4689.53  339.77
  -2   6   3 4618.34  339.97
   2   6  -3 4433.36  338.77
   0  -6  -3 2188.48  176.58
   0  -6   3 2106.79  175.58
   0  -6   3 2186.78  176.58
   0  -6   3 2473.65  180.28
   0  -6  -3 2060.79  178.28
   0   6  -3 2403.76  176.68
   0   6   3 2104.39  176.68
   0   6   3 2269.47  176.78
   0   6   3 2453.55  179.08
   0   6  -3 2249.27  175.78
   0   6  -3 2446.06  180.48
  -2  -6  -3 1225.28   96.09
   2  -6   3 1089.99   93.39
   2  -6   3 1291.97   97.89
   2  -6   3 1108.19   92.49
   2   6   3 1043.20   95.79
   2   6   3 1299.87   95.29
   2   6   3 1148.49   93.69
  -2   6  -3 1302.87   97.79
  -2   6  -3 1204.48   93.39
  -2   6  -3 1149.98   92.79
   2   6   3 1175.08   93.69
   4  -6   3   63.79    9.50
   4  -6   3   72.99    8.20
  -4  -6  -3   63.49   12.10
  -4  -6  -3   84.59   13.30
   4  -6   3   73.99   14.80
  -4   6  -3   90.19   13.60
  -4   6  -3   76.79    9.10
   4   6   3   82.69    9.70
  -4   6  -3   85.69    8.90
   4   6   3   92.69   10.50
   4   6   3   80.19   13.10
   4   6   3   76.59    9.70
   6  -6   3   42.50   10.30
   6  -6   3   52.59    6.30
  -6  -6  -3   27.00    7.20
  -6  -6  -3   45.40   10.50
   6   6   3   60.99    8.00
  -6   6  -3   48.10    6.80
   6   6   3   27.60    9.60
   6   6   3   36.70    6.80
  -6   6  -3   47.20    6.70
   6   6   3   44.90    7.10
   8  -6   3    8.10    3.70
  -8  -6  -3    6.70    8.40
   8   6   3   -8.90    6.80
   8   6   3    8.80    3.90
  -8   6  -3    3.10    3.00
  -8   6  -3    2.90    3.50
  -8   6  -3    7.20    5.90
   8   6   3    5.10    2.70
 -10  -6  -3   24.30    9.40
  10  -6   3   27.40   11.50
 -10   6  -3   14.30    7.70
  10   6   3   19.50    5.20
 -10   6  -3   29.60    4.70
  10   6   3   19.40   10.40
  12  -6   3   -5.90    4.20
  12  -6   3   -3.10    5.00
  12  -6   3   -1.20    8.90
 -12   6  -3   -2.00    3.00
  12   6   3   -8.50    8.00
  12   6   3   -4.10    3.60
  14  -6   3  285.67   28.90
  14  -6   3  249.28   35.40
 -14   6  -3  312.47   23.60
  14   6   3  228.38   32.40
  16  -6   3  310.07   40.50
  16  -6   3  371.76   34.60
  16   6   3  287.07   37.50
  16   6   3  367.66   30.10
  18  -6   3  556.54   63.89
  18  -6   3  705.43   59.09
  18   6   3  623.04   62.49
  18   6   3  715.23   54.09
  20  -6   3  289.47   43.50
  20  -6   3  403.86   38.70
  20   6   3  387.76   32.40
  20   6   3  394.26   43.30
  22  -6   3  180.58   25.00
  22   6   3  139.39   25.50
  22   6   3  153.98   17.40
 -25  -7   3   27.60    9.20
  25  -7  -3   24.00   12.50
 -25   7   3   18.80    6.50
  25   7  -3   25.20   14.50
 -23  -7   3   85.29   13.40
  23  -7  -3   89.89   17.00
 -23   7   3   83.59   13.00
  23   7  -3   72.19   22.50
 -23   7   3   98.79   13.00
 -21  -7   3   41.10    9.80
  21  -7  -3   68.09   14.40
 -21  -7   3   44.50    9.00
 -19  -7   3  256.67   28.00
 -19  -7   3  317.07   28.80
  19  -7  -3  310.57   30.80
 -19   7   3  330.87   30.00
  19   7  -3  256.57   37.20
  17  -7  -3  162.98   19.80
 -17  -7   3  150.38   18.10
 -17  -7   3  187.88   19.00
  17   7  -3   99.69   24.40
 -17   7   3  167.78   19.10
  15  -7  -3  181.58   19.50
 -15  -7   3  195.38   20.00
 -15  -7   3  177.28   18.80
  15   7  -3  132.69   26.20
 -15   7   3  154.68   18.70
 -13  -7   3  170.98   18.20
 -13  -7   3  143.79   16.70
  13  -7  -3  151.18   17.00
  13   7  -3  148.99   18.70
 -13   7   3  151.68   16.80
  13   7  -3  112.69   22.70
 -11  -7   3  285.67   25.60
  11  -7  -3  242.58   24.50
 -11  -7   3  320.37   27.50
  11   7  -3  203.18   31.30
 -11   7   3  295.57   25.90
  11   7  -3  273.97   25.30
  -9  -7   3  106.79   13.70
   9  -7  -3   85.99    9.90
  -9  -7   3   85.99   11.40
  -9  -7   3   61.49   14.00
  -9   7   3   71.79   14.90
   9   7  -3   51.89   13.70
   9   7  -3   76.09    9.50
  -9   7   3   78.29   11.10
   9   7  -3   75.29   10.50
   9   7  -3   66.99   11.80
   7  -7  -3  191.28   18.90
   7  -7  -3  148.09   25.80
  -7  -7   3  205.98   19.70
  -7  -7   3  167.98   22.60
  -7  -7   3  230.38   21.80
   7   7  -3  195.88   18.70
  -7   7   3  215.18   19.10
  -7   7   3  190.98   23.50
   7   7  -3  181.78   20.80
   7   7  -3  209.98   17.70
   7   7  -3  193.48   27.70
   5  -7  -3   66.89   15.20
  -5  -7   3   83.49   16.50
  -5  -7   3  121.59   15.20
  -5  -7   3  106.39   12.00
   5  -7  -3   93.79   10.60
  -5   7   3  111.09   11.60
  -5   7   3  109.99   11.80
   5   7  -3   98.59   14.00
   5   7  -3   92.89   10.30
  -5   7   3  120.69   16.10
  -3  -7   3  221.58   21.60
  -3  -7   3  174.28   17.60
  -3  -7   3  145.39   20.90
   3  -7  -3  157.28   23.20
   3  -7  -3  166.08   16.70
   3  -7  -3  153.48   19.30
  -3   7   3  193.38   21.10
   3   7  -3  188.98   16.50
   3   7  -3  214.18   17.80
  -3   7   3  182.68   17.50
  -3   7   3  200.58   17.90
   3   7  -3  198.38   21.10
  -1  -7   3  511.35   41.50
   1  -7  -3  376.56   38.90
   1  -7  -3  410.16   36.60
  -1  -7   3  427.76   35.90
  -1  -7   3  439.86   37.20
  -1  -7   3  372.06   40.20
   1  -7  -3  355.06   41.10
   1   7  -3  449.36   36.10
   1   7  -3  515.05   37.40
   1   7  -3  471.75   41.00
  -1   7   3  457.15   37.30
  -1   7   3  514.95   40.50
  -1   7   3  450.05   37.30
   1  -7   3  806.72   71.49
   1  -7   3  948.21   76.09
   1  -7   3  779.62   70.29
  -1  -7  -3  784.82   73.69
  -1  -7  -3  860.51   71.59
   1   7   3 1026.60   74.29
  -1   7  -3  960.60   71.69
  -1   7  -3 1003.50   76.69
  -1   7  -3  888.21   70.79
   1   7   3  907.51   71.79
   1   7   3  889.61   71.99
   3  -7   3   20.70    5.30
   3  -7   3   32.20    4.70
   3  -7   3   22.90    9.00
  -3  -7  -3   17.00    7.30
  -3  -7  -3   15.80    8.00
   3   7   3   30.80    6.50
   3   7   3   34.20    6.60
  -3   7  -3   30.00    5.30
  -3   7  -3   27.60    8.10
  -3   7  -3   31.70    5.50
   3   7   3   26.50    8.60
  -5  -7  -3  247.68   24.90
   5  -7   3  194.18   18.90
   5  -7   3  200.18   26.30
  -5  -7  -3  176.28   22.80
  -5   7  -3  240.68   20.00
   5   7   3  227.98   21.20
   5   7   3  157.78   24.00
   5   7   3  251.17   21.20
  -5   7  -3  249.78   25.30
  -5   7  -3  219.88   19.60
   7  -7   3  130.99   14.60
   7  -7   3  164.18   24.00
  -7  -7  -3  131.99   18.00
  -7   7  -3  190.48   15.80
  -7   7  -3  162.38   20.70
  -7   7  -3  168.78   15.40
   7   7   3  161.98   16.00
   7   7   3  141.29   21.10
   7   7   3  165.08   16.30
   7   7   3  151.48   15.80
   9  -7   3  266.57   34.40
  -9  -7  -3  340.17   31.50
  -9   7  -3  312.87   26.10
  -9   7  -3  328.57   25.50
   9   7   3  276.77   26.20
   9   7   3  246.68   24.90
   9   7   3  332.87   26.50
   9   7   3  239.48   31.40
  11  -7   3  283.37   37.90
  11  -7   3  290.17   27.80
 -11   7  -3  359.46   27.40
  11   7   3  277.37   34.40
  11   7   3  334.97   28.30
  13  -7   3  226.08   23.90
  13  -7   3  160.48   31.70
  13   7   3  219.68   20.60
 -13   7  -3  233.18   19.20
  13   7   3  154.88   27.00
  15  -7   3  293.77   28.30
  15  -7   3  228.88   35.60
  15   7   3  216.08   31.80
  15   7   3  259.17   24.00
 -15   7  -3  251.87   22.00
  17  -7   3   75.19   20.50
  17  -7   3   77.89   14.20
  17   7   3   75.59   20.00
  19  -7   3   52.39   18.30
  19  -7   3  105.49   19.60
  19   7   3   73.99   18.10
  21  -7   3   13.80   11.70
  21  -7   3  -10.30   11.90
  21   7   3   35.40   14.80
  24  -8  -3   22.00   11.50
 -24  -8   3   16.30    8.90
  24   8  -3   21.00   14.30
 -24   8   3    2.30    9.30
 -24   8   3   25.80    7.40
  22  -8  -3    0.70    8.40
 -22  -8   3    4.00    7.40
 -22  -8   3   -9.40    5.70
  22   8  -3  -12.10   11.70
 -22   8   3    7.00    6.70
 -20  -8   3   93.49   15.10
  20  -8  -3   93.59   15.80
 -20  -8   3   82.79   13.30
  20   8  -3   62.39   30.40
 -20   8   3  105.59   16.20
 -20   8   3  104.89   13.90
 -18  -8   3  813.02   69.79
 -18  -8   3  936.01   70.69
  18  -8  -3  840.02   71.39
 -18   8   3  930.41   71.19
  18   8  -3  685.03   77.39
 -18   8   3  809.72   68.89
 -16  -8   3  673.03   58.19
  16  -8  -3  685.93   59.09
 -16  -8   3  803.02   59.59
 -16   8   3  716.43   58.69
 -16   8   3  657.43   57.19
  16   8  -3  575.44   65.79
 -14  -8   3  759.12   56.69
  14  -8  -3  694.53   55.59
 -14  -8   3  618.04   54.79
 -14   8   3  614.84   53.99
  14   8  -3  491.25   60.89
 -14   8   3  686.23   55.49
 -12  -8   3  479.35   42.20
 -12  -8   3  561.74   44.30
 -12   8   3  488.25   42.30
  12   8  -3  420.26   49.30
 -12   8   3  457.05   41.30
 -10  -8   3  177.78   19.40
 -10  -8   3  128.29   16.60
  10   8  -3  160.18   15.40
 -10   8   3  149.39   16.30
 -10   8   3  165.58   17.30
  10   8  -3   93.79   21.90
  -8  -8   3   17.90   10.90
   8  -8  -3   17.50    4.50
   8  -8  -3   13.60   10.00
  -8  -8   3   17.30    7.10
  -8  -8   3   10.70    5.00
   8   8  -3   13.40   12.30
  -8   8   3   15.10    5.10
  -8   8   3   20.50    6.20
   8   8  -3   14.80    4.80
   8   8  -3   12.80    6.30
  -6  -8   3  154.08   20.90
   6  -8  -3  122.69   13.90
  -6  -8   3  150.28   15.70
  -6  -8   3  143.19   18.50
   6  -8  -3  114.49   23.00
  -6   8   3  150.88   20.10
   6   8  -3  120.49   17.30
   6   8  -3  140.59   13.80
  -6   8   3  148.99   15.20
   6   8  -3  143.89   15.10
  -6   8   3  132.09   14.90
   4  -8  -3  190.68   21.20
  -4  -8   3  200.48   23.00
  -4  -8   3  188.78   23.90
   4  -8  -3  199.98   18.30
   4  -8  -3  166.28   26.50
  -4  -8   3  201.98   19.60
   4   8  -3  203.08   19.10
   4   8  -3  178.98   24.40
  -4   8   3  198.68   19.10
  -4   8   3  220.28   23.40
   4   8  -3  203.28   18.00
  -2  -8   3  351.06   33.50
  -2  -8   3  345.57   27.90
   2  -8  -3  301.87   28.30
   2  -8  -3  315.77   31.50
  -2  -8   3  292.87   32.90
  -2  -8   3  349.77   30.60
   2  -8  -3  264.47   34.40
  -2   8   3  370.36   33.00
   2   8  -3  325.77   29.00
  -2   8   3  349.47   30.10
   2   8  -3  345.47   28.10
   2   8  -3  342.37   33.10
  -2   8   3  341.07   29.40
   0  -8   3   66.69    7.60
   0  -8  -3   75.59   13.40
   0  -8   3   65.69   13.50
   0  -8  -3   60.89    8.60
   0  -8  -3   45.80   12.00
   0  -8   3   52.09   13.10
   0   8  -3   65.89    9.30
   0   8   3   58.99   10.80
   0   8  -3   56.39   11.60
   0   8   3   71.39    9.90
   0   8   3   53.99   10.00
   0   8  -3   63.39    8.30
  -2  -8  -3    1.00    7.10
   2  -8   3    5.00    6.60
   2  -8   3    2.50    4.30
  -2  -8  -3   12.90    7.70
   2  -8   3    9.30    3.30
  -2   8  -3    9.20    6.20
   2   8   3    8.90    4.40
  -2   8  -3    9.20    4.00
   2   8   3   12.10    4.90
  -2   8  -3    5.10    4.00
   2   8   3    7.80    5.00
  -4  -8  -3    7.70    8.30
   4  -8   3   22.80    4.60
   4  -8   3   20.90    9.70
  -4  -8  -3   14.80    8.50
  -4   8  -3   28.80    5.70
   4   8   3   26.50    6.10
   4   8   3   25.00    6.60
  -4   8  -3   12.60    7.30
   4   8   3    9.90    9.10
  -4   8  -3   45.30   10.40
   4   8   3   28.60    6.50
   6  -8   3  876.51   79.59
  -6  -8  -3  934.41   76.99
   6  -8   3  801.62   71.39
  -6   8  -3  914.31   72.19
   6   8   3  967.00   73.09
   6   8   3  845.22   72.59
  -6   8  -3  969.80   72.39
   6   8   3  897.51   73.39
   8  -8   3 1553.04  136.59
  -8  -8  -3 1830.22  134.19
   8  -8   3 1528.85  128.49
   8   8   3 1374.96  133.29
   8   8   3 1641.64  129.29
  -8   8  -3 1800.32  128.69
   8   8   3 1571.74  129.09
  -8   8  -3 1754.82  128.89
  10  -8   3  652.33   68.39
  10  -8   3  685.33   58.89
  10   8   3  674.33   65.59
 -10   8  -3  771.42   58.79
 -10   8  -3  799.82   59.79
  10   8   3  733.23   59.89
  12  -8   3  586.24   66.99
 -12   8  -3  802.32   56.89
  12   8   3  718.03   58.39
  12   8   3  629.54   63.99
  14  -8   3  171.88   34.30
  14  -8   3  248.48   26.80
 -14   8  -3  244.08   21.40
  14   8   3  233.08   31.40
  16  -8   3   -6.80   10.90
  16  -8   3    2.10    7.90
  16   8   3   -4.10   11.90
  18  -8   3    3.90    9.00
  18  -8   3   -9.40   11.50
  18   8   3   -8.70   11.60
  20  -8   3   59.09   15.10
  20  -8   3   34.30   19.00
  20   8   3   46.50   17.00
  23   9  -3   29.30   14.60
 -21  -9   3    2.20    7.40
  21  -9  -3   -2.40    8.60
 -21  -9   3   -8.40    6.20
 -21   9   3    1.30    8.40
  21   9  -3   -1.40   14.10
 -19  -9   3  126.29   17.20
 -19  -9   3   92.09   14.70
  19  -9  -3  126.09   18.10
  19   9  -3   66.29   21.30
 -19   9   3   75.29   17.20
 -17  -9   3  467.25   43.30
 -17  -9   3  522.05   44.40
  17  -9  -3  484.75   44.20
  17   9  -3  374.06   50.49
 -17   9   3  543.45   44.20
 -15  -9   3  890.01   68.69
 -15  -9   3  785.42   66.99
  15  -9  -3  799.12   67.59
  15   9  -3  651.93   73.99
 -15   9   3  836.12   67.59
 -13  -9   3  687.23   55.69
 -13  -9   3  603.14   53.49
 -13   9   3  637.04   53.79
  13   9  -3  644.24   52.49
  13   9  -3  544.15   60.89
 -11  -9   3  763.62   66.09
 -11  -9   3  899.81   68.89
  11   9  -3  811.92   64.99
 -11   9   3  822.62   66.59
  11   9  -3  653.13   72.79
  -9  -9   3   36.50   10.30
  -9  -9   3   27.90    7.30
   9  -9  -3   18.10   13.40
  -9   9   3   31.40    7.90
   9   9  -3   33.00    6.60
   9   9  -3   26.00    8.50
   9   9  -3   35.30   16.70
  -7  -9   3  516.15   53.09
   7  -9  -3  382.66   49.10
  -7  -9   3  479.15   41.50
  -7   9   3  519.45   41.70
   7   9  -3  439.96   44.20
   7   9  -3  531.65   40.30
  -5  -9   3  855.11   70.99
   5  -9  -3  698.03   68.29
  -5  -9   3  785.42   66.79
   5  -9  -3  831.92   68.39
   5   9  -3  844.42   65.59
   5   9  -3  793.92   70.39
  -5   9   3  893.91   67.19
   3  -9  -3  542.75   47.70
   3  -9  -3  459.05   54.79
   3  -9  -3  510.45   50.69
  -3  -9   3  633.74   53.59
  -3  -9   3  547.85   48.60
   3   9  -3  603.14   52.99
   3   9  -3  616.34   47.60
  -3   9   3  610.84   48.90
  -3   9   3  671.03   53.39
  -1  -9   3  413.46   46.60
  -1  -9   3  513.25   47.30
  -1  -9   3  497.25   40.20
  -1  -9   3  430.96   41.60
   1  -9  -3  506.35   45.20
   1  -9  -3  448.36   41.00
   1   9  -3  515.05   40.80
  -1   9   3  517.75   45.40
  -1   9   3  538.55   42.30
   1   9  -3  511.85   46.90
  -1  -9  -3   59.59   11.10
   1  -9   3   60.69    9.90
  -1  -9  -3   68.69   13.30
  -1  -9  -3   34.70   12.10
   1  -9   3   45.10   11.80
   1  -9   3   55.79    7.90
  -1   9  -3   55.99    8.50
  -1   9  -3   58.99    9.30
   1   9   3   64.69    9.70
   1   9   3   73.29   13.50
   3  -9   3   -5.30    7.20
   3  -9   3    3.20    3.70
  -3  -9  -3   -3.50    8.10
  -3  -9  -3   13.60   10.60
   3   9   3    6.50    5.50
   3   9   3    1.10    5.40
  -3   9  -3    3.80    4.70
  -3   9  -3    3.10    4.30
   5  -9   3  362.16   32.80
   5  -9   3  439.76   43.20
  -5  -9  -3  330.77   38.90
  -5  -9  -3  389.06   39.00
  -5   9  -3  428.56   34.10
   5   9   3  388.36   34.60
   5   9   3  458.05   36.40
  -5   9  -3  417.56   34.00
   5   9   3  293.87   38.30
   7  -9   3  985.70   79.29
  -7  -9  -3  821.32   82.89
   7  -9   3  941.51   88.29
   7   9   3 1075.59   80.79
   7   9   3  899.71   85.59
   7   9   3 1012.60   81.29
  -7   9  -3 1139.89   80.19
  -7   9  -3 1078.89   85.79
   9  -9   3  516.25   57.29
   9  -9   3  553.04   46.70
  -9  -9  -3  499.25   50.09
   9   9   3  479.15   53.49
  -9   9  -3  614.34   47.30
   9   9   3  612.44   48.40
  -9   9  -3  659.13   48.00
   9   9   3  558.44   48.00
 -11   9  -3  730.03   57.59
 -11   9  -3  765.02   56.79
  11   9   3  557.14   63.09
  11   9   3  664.53   57.69
  13  -9   3   15.90   14.20
 -13   9  -3   34.80    7.80
  13   9   3   23.00   12.70
  13   9   3   39.00    9.20
  15  -9   3   64.89   21.50
  15  -9   3  108.69   17.60
 -15   9  -3   87.79   11.70
  15   9   3   88.79   18.90
  17  -9   3  164.38   22.30
  17   9   3  156.78   19.50
  17   9   3  138.09   27.10
 -17   9  -3  141.29   16.40
  19  -9   3  111.59   18.70
 -19   9  -3  123.69   14.00
  19   9   3   69.29   19.70
 -20 -10   3   -1.50    7.30
 -20 -10   3    0.30    8.40
  20 -10  -3    9.10    9.90
 -20  10   3    5.40    9.20
  20  10  -3   -0.10   11.70
  18 -10  -3    2.70    7.30
 -18 -10   3    7.50    8.10
  18 -10  -3  -10.70   13.60
 -18 -10   3    6.50    8.00
  18  10  -3  -14.40   10.80
 -18  10   3   10.60   10.10
  18  10  -3    7.90    6.60
 -16 -10   3   35.30   10.40
  16 -10  -3   22.10   15.20
 -16 -10   3   15.50    7.60
  16 -10  -3   29.40    9.40
  16  10  -3    9.00   13.90
 -16  10   3   37.80   10.70
  16  10  -3   27.10    7.70
 -14 -10   3  130.79   18.60
 -14 -10   3  225.88   35.50
 -14  10   3  152.58   18.70
  14  10  -3  131.89   16.30
 -12 -10   3   97.49   18.30
 -12 -10   3   60.69   11.40
  12 -10  -3   42.90   18.50
 -12  10   3   82.99   12.80
  12  10  -3  104.89   12.60
  12  10  -3   86.39   21.40
 -10 -10   3  -11.80    5.50
  10 -10  -3   -7.10   11.10
 -10 -10   3   -4.70    7.50
 -10  10   3   -0.80    6.30
  10  10  -3    1.30    5.40
  10  10  -3   -2.60    4.80
  -8 -10   3   -5.40    5.80
  -8 -10   3   -1.50    7.60
   8 -10  -3    1.00   11.60
  -8  10   3    5.80    7.00
   8  10  -3   -1.70    5.50
   8  10  -3   -2.90    4.60
   6 -10  -3  561.24   55.29
  -6 -10   3  657.03   55.69
  -6 -10   3  544.55   50.59
   6 -10  -3  476.35   58.89
   6  10  -3  657.03   49.40
  -6  10   3  638.14   50.89
   4 -10  -3   39.40   15.20
  -4 -10   3   65.79   10.80
  -4 -10   3   53.79   12.70
   4  10  -3   84.69   10.70
  -4  10   3   59.19   10.50
  -2 -10   3  204.78   23.30
  -2 -10   3  260.37   30.20
   2  10  -3  239.38   22.10
  -2  10   3  235.68   23.60
   0 -10   3   74.09   11.90
   0 -10  -3   51.09   16.00
   0 -10   3   79.19   10.50
   0 -10   3   91.69   17.70
   0 -10  -3   81.09   15.60
   0  10  -3  103.39   12.10
   0  10   3   97.19   13.70
   0  10   3  102.89   17.20
  -2 -10  -3    2.00   15.40
   2 -10   3   19.70    6.50
  -2 -10  -3    7.60    9.60
   2 -10   3    8.50    8.60
  -2  10  -3   13.90    6.20
   2  10   3    8.50    6.40
   2  10   3   11.10    6.80
  -4 -10  -3   42.20   13.20
   4 -10   3   44.30    7.70
   4 -10   3   50.09   14.80
  -4 -10  -3   60.69   14.00
   4  10   3   72.59   17.70
   4  10   3   53.39    9.60
  -4  10  -3   67.49   10.30
   6 -10   3   72.99   17.50
  -6 -10  -3   56.99   14.20
   6 -10   3   62.39    9.40
   6  10   3   76.69   11.90
   6  10   3   57.09   14.90
  -6  10  -3   98.09   12.10
   8 -10   3   17.00   13.20
  -8 -10  -3   16.40    9.40
   8  10   3    0.50    9.70
   8  10   3   14.20    6.20
   8  10   3   13.90    6.00
  -8  10  -3   25.40    7.00
 -10 -10  -3   13.30    9.20
  10 -10   3   17.10   13.80
  10  10   3   21.40    6.00
 -10  10  -3   33.20    7.80
  10  10   3   23.70    7.10
  10  10   3   13.20   11.70
  12 -10   3   10.00   14.40
 -12  10  -3   28.60    8.60
  12  10   3   25.60    8.30
  12  10   3   16.70   13.20
  14 -10   3  -11.50   22.20
 -14  10  -3  -12.60    5.30
  14  10   3   -9.30   10.20
  16 -10   3   20.40   10.80
  16 -10   3   14.30   15.90
  16  10   3    4.20    6.70
 -16  10  -3  -12.10    6.40
  16  10   3    8.80   13.70
  18 -10   3   75.19   14.80
  18 -10   3   32.80   18.30
  18  10   3   58.69   12.60
 -18  10  -3   45.60   12.50
  18  10   3   67.29   19.00
 -19 -11   3  136.39   22.80
  19 -11  -3  153.78   21.80
 -19 -11   3  152.28   20.30
 -19  11   3  113.89   18.80
  19  11  -3  151.78   18.80
  19  11  -3  145.99   31.40
 -17 -11   3  252.67   29.60
  17 -11  -3  268.57   28.40
 -17 -11   3  272.37   29.60
  17  11  -3  210.78   38.30
  17  11  -3  255.97   25.90
 -17  11   3  237.38   27.40
 -15 -11   3   84.59   15.20
 -15 -11   3  116.59   20.70
  15 -11  -3  154.18   18.60
 -15  11   3  139.49   18.50
  15  11  -3  129.49   16.10
  15  11  -3  103.79   25.20
 -13 -11   3   73.39   12.60
  13 -11  -3   72.19   22.20
 -13 -11   3  118.49   19.90
  13  11  -3  106.69   24.20
 -11 -11   3   14.90    8.10
  11 -11  -3    8.40   15.30
 -11 -11   3   36.10   11.40
 -11  11   3   39.10    9.50
  11  11  -3   57.79    9.60
  -9 -11   3   43.80   11.80
   9 -11  -3   20.60   13.60
  -9 -11   3   35.80    9.70
  -9  11   3   54.39    9.90
   9  11  -3   54.29    9.00
   7 -11  -3  136.19   20.20
  -7 -11   3  110.09   16.60
  -7 -11   3  133.89   22.30
   7 -11  -3   85.49   23.40
  -7  11   3  136.39   16.70
   7  11  -3  127.39   15.00
   5 -11  -3  151.18   21.70
  -5 -11   3  157.88   25.00
  -5 -11   3  122.69   18.40
   5  11  -3  164.18   16.90
  -5  11   3  160.98   18.50
  -3 -11   3   -8.80    8.20
   3 -11  -3    6.50    8.60
  -3  11   3   -5.60    5.70
   3  11  -3   -4.00    5.20
  -1 -11   3  169.08   21.90
  -1 -11   3  198.88   19.60
   1 -11  -3  211.88   25.40
  -1 -11   3  187.98   29.20
   1  11  -3  219.38   22.40
  -1  11   3  241.58   22.60
  -1 -11  -3   -3.20   10.70
   1 -11   3   -2.30    8.70
   1 -11   3   -3.60    4.10
   1  11   3    8.20    7.20
  -1  11  -3   -3.60    5.60
  -3 -11  -3   -0.20   10.50
   3 -11   3   12.80    5.20
   3 -11   3   13.80   11.70
   3  11   3   18.90    7.40
   3  11   3   15.70    7.70
  -3  11  -3   26.80    7.80
  -5 -11  -3   58.59   16.70
   5 -11   3   72.59   11.20
   5  11   3   69.89   12.90
   5  11   3  105.99   13.70
  -5  11  -3   82.09   11.60
  -7 -11  -3  289.17   38.20
   7 -11   3  320.57   43.40
   7  11   3  410.06   33.30
  -7  11  -3  417.96   33.00
   7  11   3  325.77   39.60
  -9 -11  -3   59.39   15.30
   9 -11   3   64.69   19.90
  -9  11  -3   88.79   12.30
   9  11   3   72.19   18.50
   9  11   3  101.39   13.90
   9  11   3   69.99   13.50
  11  11   3  458.65   37.10
  11  11   3  372.96   35.80
  11  11   3  347.47   44.20
  13  11   3  110.69   16.00
 -13  11  -3  112.19   16.30
  13  11   3   70.29   20.20
  15 -11   3   44.20   20.40
  15  11   3   39.00   15.70
  15  11   3   54.69   11.30
 -16 -12   3  704.43   61.39
 -16 -12   3  571.34   57.89
  16 -12  -3  709.33   59.49
  16  12  -3  601.04   68.29
 -16  12   3  685.93   59.19
  16  12  -3  696.53   57.09
 -14 -12   3  427.86   44.10
 -14 -12   3  522.55   48.30
 -14  12   3  491.95   46.00
  14  12  -3  486.75   42.80
 -12 -12   3  503.65   47.20
 -12 -12   3  425.36   44.60
 -12  12   3  464.65   43.00
  12  12  -3  469.55   41.20
  10 -12  -3   -7.50   12.00
 -10 -12   3   11.00    9.80
 -10 -12   3    8.40    7.00
 -10  12   3   11.30    7.90
  10  12  -3   24.60    7.10
  -8 -12   3    0.40    8.50
   8 -12  -3  -12.40   10.40
  -8 -12   3   -6.30    6.10
  -8  12   3   -3.00    7.50
   8  12  -3    2.90    5.80
   6 -12  -3   17.00   15.30
  -6 -12   3   37.80   12.50
  -6 -12   3   45.20   10.40
   6  12  -3   70.29   10.20
  -6  12   3   52.09   12.00
  -4 -12   3  192.28   24.00
  -4 -12   3  211.58   31.00
   4  12  -3  252.87   22.90
  -4  12   3  246.28   24.70
  -2 -12   3   59.29   14.90
   2  12  -3   69.79   10.90
  -2  12   3   72.09   12.80
   0 -12  -3   11.40   14.20
   0 -12   3   23.10   13.20
   0  12   3   27.30    8.50
   0  12  -3   33.50    7.80
  -2 -12  -3  -10.00   10.90
   2 -12   3  -16.30    9.80
  -2  12  -3   -0.90    6.10
   2  12   3    3.30    6.80
  -4 -12  -3   88.59   19.00
   4 -12   3   98.29   20.80
   6 -12   3  408.66   51.39
  -6 -12  -3  371.46   47.00
  -6  12  -3  541.95   41.00
   6  12   3  423.36   46.00
   6  12   3  531.45   41.70
  -8 -12  -3  465.15   53.89
   8 -12   3  525.65   60.09
   8  12   3  522.55   48.80
   8  12   3  571.44   47.60
  -8  12  -3  602.14   47.30
 -10 -12  -3  669.93   64.49
  10 -12   3  713.43   73.59
  10  12   3  772.02   69.29
  10  12   3  808.12   67.79
  10  12   3  620.44   62.39
  12  12   3  442.26   41.80
 -12  12  -3  467.85   41.80
  14 -12   3   32.60   19.50
  14  12   3  100.49   22.30
  14  12   3   65.99   13.00
 -14  12  -3   86.79   13.70
 -15 -13   3  470.05   48.40
 -15  13   3  472.25   45.50
  15  13  -3  499.45   46.20
 -13 -13   3  200.68   26.70
 -13 -13   3  230.28   31.80
  13  13  -3  256.67   25.40
 -13  13   3  256.87   28.00
 -11 -13   3  167.88   23.70
 -11 -13   3  204.28   29.70
  11  13  -3  193.58   21.60
 -11  13   3  220.78   25.60
  -9 -13   3   42.80   11.50
   9 -13  -3   27.50   17.30
  -9 -13   3   51.39   15.80
  -9  13   3   64.99   12.20
   9  13  -3   74.89   11.90
   7 -13  -3  -21.50   12.60
  -7 -13   3   -5.90    9.10
  -7  13   3   15.70    9.50
   7  13  -3    6.30    6.70
   5 -13  -3   11.40   14.40
  -5 -13   3   18.40   12.20
   5  13  -3   39.30    8.80
  -5  13   3   22.70    8.60
   3 -13  -3   10.20   14.30
  -3 -13   3    2.10    9.90
   3  13  -3   16.90    7.10
  -3  13   3   15.20    8.70
  -1 -13   3   42.40   15.50
   1 -13  -3   13.40   13.70
   1  13  -3   44.80    8.90
  -1  13   3   40.20   10.10
   1 -13   3   16.90   12.30
  -1 -13  -3   26.40   15.40
  -1  13  -3   37.20    8.70
   1  13   3   46.70   11.40
  -3  13  -3  152.78   18.30
   3  13   3  143.19   19.10
  -5 -13  -3  160.78   32.20
   5 -13   3  198.48   35.80
  -5  13  -3  257.47   24.20
   5  13   3  251.87   25.00
   7 -13   3  408.06   54.09
  -7 -13  -3  382.56   49.00
  -7  13  -3  559.24   42.70
   7  13   3  512.85   44.90
   9 -13   3  274.17   42.70
  -9 -13  -3  254.77   35.20
   9  13   3  244.88   32.90
 -11  13  -3  308.67   29.00
  11  13   3  272.47   38.00
  11  13   3  336.07   29.50
  11  13   3  212.98   29.20
 -10 -14   3   55.69   16.30
 -10  14   3   74.19   15.30
  10  14  -3   85.59   13.20
  -8 -14   3   69.49   17.20
   8 -14  -3   38.60   21.50
   8  14  -3   60.79   11.60
  -8  14   3   71.09   14.20
  -6 -14   3   71.89   19.90
   6 -14  -3   66.39   23.10
   6  14  -3   95.69   13.70
  -6  14   3   65.19   13.30
   4 -14  -3  217.28   46.40
  -4 -14   3  264.37   39.80
   4  14  -3  333.17   29.80
  -4  14   3  401.36   40.00
  -2 -14   3   -2.00   13.50
   2 -14  -3  -20.00   11.00
   2  14  -3   -7.20    6.50
   0 -14   3  100.79   23.80
   0  14  -3  121.89   16.80
   2 -14   3   32.40   16.50
  -2  14  -3   36.50    9.80
   2  14   3   45.30   12.50
  -4 -14  -3   59.29   18.20
   4 -14   3   84.99   21.40
   6 -14   3   12.90   16.80
  -6 -14  -3   11.00   14.60
  -6  14  -3   43.40   10.30
   6  14   3   41.80   10.40
   8 -14   3   67.99   22.70
  -8 -14  -3   68.79   19.20
  -8  14  -3  126.39   17.20
  -3 -15   3  428.26   55.19
   3  15  -3  545.65   45.40
  -3  15   3  521.65   46.50
  -1 -15   3  136.09   29.30
   1  15  -3  204.18   22.40
  -1  15   3  204.68   23.30
  -1 -15  -3  143.19   45.50
   1 -15   3  114.79   25.80
  28   0  -4   31.40   17.10
 -28   0   4   24.00    6.40
 -26   0   4  100.69   12.20
 -24   0   4  539.65   43.40
  24   0  -4  511.55   51.99
 -24   0   4  517.75   55.79
 -22   0   4  200.18   17.80
 -22   0   4  164.98   29.80
  22   0  -4  159.68   25.60
  20   0  -4 1205.58  101.19
 -20   0   4 1305.97   95.59
 -20   0   4 1061.59  115.79
  18   0  -4  550.94   51.49
 -18   0   4  619.34   46.80
 -18   0   4  481.75   53.39
 -18   0   4  633.34   50.59
  16   0  -4   46.40   10.40
  16   0  -4   37.40    6.50
 -16   0   4   26.00   10.30
 -16   0   4   56.99    7.50
  14   0  -4  242.48   24.30
  14   0  -4  224.18   21.00
 -14   0   4  265.77   23.40
 -14   0   4  226.18   20.70
 -12   0   4   93.99   10.20
  12   0  -4   95.19   13.40
 -12   0   4  110.99   12.50
  12   0  -4   96.59   10.30
  10   0  -4 3288.57  261.57
 -10   0   4 3220.68  261.77
  10   0  -4 2946.61  261.67
 -10   0   4 3917.81  263.27
  10   0  -4 3549.54  263.47
  -8   0   4  763.82   56.89
   8   0  -4  723.13   58.39
  -8   0   4  710.53   57.19
   8   0  -4  649.24   57.09
   8   0  -4  756.82   56.79
  -6   0   4 4349.46  376.16
   6   0  -4 4973.50  375.86
   6   0  -4 4637.04  376.96
  -6   0   4 5506.15  376.96
  -6   0   4 4909.51  375.76
   4   0  -4 2579.04  180.58
  -4   0   4 2315.17  181.28
  -4   0   4 2320.27  181.18
   4   0  -4 2180.88  181.08
   4   0  -4 2290.07  181.38
   2   0  -4  834.42   61.49
  -2   0   4  823.12   61.49
  -2   0   4  712.93   61.99
   0   0   4 2739.83  211.78
   2   0   4 1714.43  125.99
   2   0   4 1519.75  126.19
   4   0   4 5709.23  413.56
   4   0   4 5798.12  413.26
  -4   0  -4 4547.65  412.96
   6   0   4 7403.26  526.15
  -6   0  -4 6114.89  525.65
   6   0   4 6923.71  526.65
  -8   0  -4   65.99    8.50
   8   0   4   65.69   10.20
   8   0   4   73.39    9.50
  10   0   4   38.50    8.90
 -10   0  -4   46.40    7.50
  10   0   4   52.99    9.30
  12   0   4 1203.78  102.79
 -12   0  -4 1258.57  101.59
 -12   0  -4 1353.76  103.09
  14   0   4 1596.34  131.79
 -14   0  -4 1670.53  129.19
 -16   0  -4  488.15   41.10
  16   0   4  466.65   44.90
 -18   0  -4  284.17   26.80
  18   0   4  276.07   31.60
  20   0   4   86.79   17.80
 -20   0  -4   54.39    9.80
 -22   0  -4   20.80    7.50
  22   0   4   28.00   13.00
  24   0   4    7.80   13.40
 -27  -1   4  105.49   12.60
  27  -1  -4   81.79   20.40
 -27   1   4   97.69   11.70
  27   1  -4   60.29   18.10
 -25  -1   4  -18.40   12.70
 -25  -1   4   -4.80    4.80
  25  -1  -4    1.90   11.00
  25   1  -4  -10.90   10.00
 -25   1   4   -1.30    4.40
  23  -1  -4  289.47   35.80
 -23  -1   4  353.56   28.30
 -23  -1   4  281.27   39.10
  23   1  -4  311.27   37.10
 -23   1   4  345.87   28.20
 -21  -1   4  267.77   22.50
 -21  -1   4  212.38   32.80
  21  -1  -4  255.67   29.60
  21   1  -4  237.68   30.30
 -21   1   4  250.37   22.40
 -21   1   4  241.18   33.90
 -19  -1   4  323.77   40.40
  19  -1  -4  396.66   38.20
 -19  -1   4  439.96   32.80
 -19   1   4  366.66   42.60
  19   1  -4  386.06   39.10
 -19   1   4  388.06   32.60
  17  -1  -4  165.68   30.70
 -17  -1   4  154.08   17.90
 -17  -1   4  143.09   13.30
  17  -1  -4  114.69   13.90
  17   1  -4  113.09   13.60
 -17   1   4  147.79   16.40
  17   1  -4  106.19   13.20
 -17   1   4  123.39   13.10
  17   1  -4  118.69   19.20
 -17   1   4  130.09   22.40
  15  -1  -4   15.20    7.20
 -15  -1   4   12.40    3.70
 -15  -1   4   11.80    6.10
  15  -1  -4    9.70    3.60
  15   1  -4    3.90    3.10
  15   1  -4    7.50    6.90
 -15   1   4    5.80    8.60
 -15   1   4    5.70    3.50
 -15   1   4    6.20    5.00
  15   1  -4    6.60    4.60
  13  -1  -4    9.40    4.10
  13  -1  -4    9.90    6.30
 -13  -1   4   23.80    6.70
 -13  -1   4   11.40    3.60
  13   1  -4   16.70    7.80
  13   1  -4    9.70    3.70
 -13   1   4    9.80    3.70
  13   1  -4   12.90    3.60
 -13   1   4   12.40    5.30
 -13   1   4    7.60    7.10
  11  -1  -4  178.58   17.30
  11  -1  -4  153.68   15.10
 -11  -1   4  214.78   18.70
 -11  -1   4  167.78   15.20
 -11   1   4  155.98   15.30
  11   1  -4  142.09   18.40
 -11   1   4  191.78   16.40
  11   1  -4  155.48   14.90
  11   1  -4  156.48   15.20
 -11   1   4  167.98   15.50
  -9  -1   4  771.62   59.99
   9  -1  -4  848.52   60.99
   9  -1  -4  797.32   59.89
  -9   1   4  787.62   59.89
  -9   1   4  661.53   59.89
   9   1  -4  718.03   61.99
   9   1  -4  769.02   59.59
   9   1  -4  694.03   59.89
   7  -1  -4 1366.86  104.69
  -7  -1   4 1365.66  104.99
   7  -1  -4 1423.06  105.29
   7   1  -4 1309.07  104.29
   7   1  -4 1228.58  104.89
   7   1  -4 1302.97  106.69
  -7   1   4 1555.54  104.99
  -7   1   4 1346.97  104.69
  -7   1   4 1189.08  104.89
  -5  -1   4 4289.47  342.67
   5  -1  -4 4571.34  341.47
   5  -1  -4 4540.55  341.27
  -5  -1   4 4454.35  341.67
   5   1  -4 4560.64  340.87
   5   1  -4 4036.00  342.77
  -5   1   4 4512.75  341.27
   3  -1  -4  547.65   42.20
  -3  -1   4  486.15   43.50
  -3  -1   4  540.05   42.60
  -3  -1   4  545.15   41.60
   3   1  -4  559.64   41.70
  -3   1   4  555.14   42.30
   3   1  -4  514.05   42.60
   1  -1  -4  873.51   63.49
  -1  -1   4  795.72   63.59
  -1  -1   4  714.53   64.89
  -1   1   4  865.61   63.19
  -1   1   4  855.21   63.49
   1   1  -4  769.72   63.59
   1  -1   4 2119.69  156.58
   1  -1   4 2055.79  158.08
  -1   1  -4 1927.91  156.48
  -1   1  -4 1770.62  157.78
   1   1   4 2242.98  156.98
   3  -1   4 1545.25  111.19
   3  -1   4 1490.75  109.19
   3   1   4 1568.74  110.59
   3   1   4 1276.57  109.89
  -3   1  -4 1286.27  109.19
  -3   1  -4 1309.77  110.89
   5  -1   4 1846.22  153.78
   5  -1   4 2033.50  154.28
  -5  -1  -4 2152.88  154.18
   5   1   4 1998.40  152.78
  -5   1  -4 1924.71  154.28
   5   1   4 1863.11  153.88
  -7  -1  -4   31.80    6.90
   7  -1   4   35.40    7.20
   7  -1   4   28.70    6.10
   7   1   4   38.00    5.90
   7   1   4   25.50    6.40
  -7   1  -4   31.30    6.00
   7   1   4   29.10    3.80
  -9  -1  -4  121.59   13.50
   9  -1   4   94.89   13.00
   9  -1   4  111.59   13.90
  -9  -1  -4   94.19   10.20
   9   1   4   87.79   12.70
  -9   1  -4  106.09   12.60
   9   1   4  118.69    9.10
   9   1   4  116.59   13.80
  11  -1   4  484.85   46.50
 -11  -1  -4  594.34   47.20
  11   1   4  508.85   47.40
 -11   1  -4  586.74   46.00
  13  -1   4  742.03   67.29
 -13   1  -4  855.11   66.49
  15  -1   4  326.37   33.60
  15   1   4  330.17   34.40
 -15   1  -4  358.16   31.70
  17  -1   4   20.60   10.50
 -17   1  -4   15.70    6.80
  17   1   4   14.70   10.10
  19  -1   4   67.79   16.20
  19   1   4   53.19   15.60
  21  -1   4   35.50   13.30
  21   1   4   37.50   16.80
 -21   1  -4   28.60    9.70
  23  -1   4    3.50   10.50
  23   1   4   -5.10   11.10
 -28  -2   4  -13.40   16.60
  28  -2  -4   36.10   16.70
 -28   2   4   25.20    5.80
  28   2  -4   42.50   18.20
  26  -2  -4   -0.70   12.40
  26   2  -4   -5.90   13.00
 -26   2   4   -6.20    4.40
 -24  -2   4   43.10   17.80
 -24  -2   4   48.00    8.00
  24  -2  -4   54.79   16.10
  24   2  -4   26.60   14.00
 -24   2   4   48.40    7.50
 -22  -2   4    6.90    4.80
 -22  -2   4   -9.10   11.20
  22  -2  -4   14.10   10.60
  22   2  -4    7.00    5.10
  22   2  -4  -10.70   10.70
 -22   2   4    0.60    4.30
 -20  -2   4   70.39    9.00
  20  -2  -4   44.30   12.20
 -20  -2   4   31.70   13.20
  20   2  -4   45.10   15.20
 -20   2   4   42.70    7.40
 -20   2   4   33.10   13.50
  20   2  -4   43.40    7.60
  18  -2  -4   10.80    7.90
 -18  -2   4    7.40    4.10
 -18   2   4    5.50    4.30
 -18   2   4    6.40    6.60
 -18   2   4   19.70   11.60
  18   2  -4    3.40    9.10
  18   2  -4    6.10    4.40
 -16  -2   4    2.70    3.40
  16  -2  -4   -0.90    3.90
 -16  -2   4    5.10    7.50
  16  -2  -4   -2.80    6.30
  16   2  -4    1.60    4.00
 -16   2   4   -3.60    7.40
 -16   2   4    1.90    4.60
  16   2  -4   -1.20    2.80
 -16   2   4    2.20    3.40
  16   2  -4    2.30    7.60
 -14  -2   4   83.79    9.80
  14  -2  -4   92.69   12.60
  14  -2  -4   74.79   13.30
 -14  -2   4   97.19   14.10
  14   2  -4   70.99   14.00
 -14   2   4   89.49   10.50
 -14   2   4   81.29    9.90
 -14   2   4   91.69   16.50
 -14   2   4   84.59   11.00
  14   2  -4   74.39    9.70
 -12  -2   4   85.19   12.60
  12  -2  -4   54.09    8.60
 -12  -2   4   63.89    7.60
  12  -2  -4   64.89    8.00
 -12   2   4   54.19    8.10
  12   2  -4   53.79    7.60
 -12   2   4   36.30   10.20
  12   2  -4   44.50   11.20
 -12   2   4   31.80    6.20
 -12   2   4   48.20    7.00
  10  -2  -4  178.38   17.40
 -10  -2   4  201.28   17.40
  10  -2  -4  209.08   18.40
 -10  -2   4  222.68   21.20
 -10   2   4  199.58   17.70
 -10   2   4  152.68   22.50
 -10   2   4  205.68   17.70
  10   2  -4  190.98   17.50
  10   2  -4  206.78   22.30
   8  -2  -4  555.34   45.60
  -8  -2   4  599.64   45.80
   8  -2  -4  618.04   45.90
  -8  -2   4  572.54   48.10
  -8   2   4  548.25   45.70
   8   2  -4  509.85   48.30
  -8   2   4  615.64   45.50
   8   2  -4  534.65   45.70
   6  -2  -4 2629.84  205.38
  -6  -2   4 2441.16  207.28
  -6  -2   4 2786.72  205.58
   6  -2  -4 3001.50  205.08
   6   2  -4 2365.66  207.58
  -6   2   4 2712.83  205.48
   6   2  -4 2609.64  205.58
  -4  -2   4 2624.14  208.28
  -4  -2   4 2848.42  206.28
  -4  -2   4 2414.46  207.88
   4   2  -4 2661.33  206.28
  -4   2   4 2767.72  206.18
   2  -2  -4  235.28   18.30
  -2  -2   4  191.78   19.90
  -2  -2   4  222.98   18.20
  -2   2   4  226.08   18.30
   2   2  -4  215.28   18.30
   0  -2   4   14.30    2.70
   0  -2   4    7.00    3.20
   0  -2  -4   16.70    3.40
   0   2   4    9.70    3.00
   0   2  -4   16.00    2.90
   0   2  -4   15.20    5.20
   0   2   4   17.40    4.00
   2  -2   4  177.18   17.00
  -2  -2  -4  199.38   15.90
   2  -2   4  171.28   14.70
   2   2   4  203.08   16.20
  -2   2  -4  161.28   17.00
  -2   2  -4  170.08   14.80
   4  -2   4  400.66   34.10
  -4  -2  -4  426.36   33.20
   4   2   4  394.66   33.20
  -4   2  -4  395.46   34.10
  -4   2  -4  377.36   31.40
   6  -2   4  121.99   13.60
  -6  -2  -4  102.09   11.80
   6   2   4  111.59   12.50
   6   2   4   92.09    9.40
  -6   2  -4  107.89   12.40
  -6   2  -4   81.49    8.30
  -8  -2  -4  154.78   16.40
   8  -2   4  153.68   16.10
   8  -2   4  160.98   17.80
   8   2   4  156.68   16.90
   8   2   4  143.99   13.40
  -8   2  -4  154.28   16.60
  10  -2   4    1.20    3.80
  10  -2   4    2.90    4.40
 -10  -2  -4    4.40    5.20
  10  -2   4    5.30    5.50
 -10   2  -4    3.30    4.30
  10   2   4    2.40    2.00
  10   2   4   -2.60    4.80
  12  -2   4   46.30    7.50
  12  -2   4   44.70   10.00
  12  -2   4   38.80   10.00
 -12  -2  -4   48.10    9.90
 -12   2  -4   47.30    9.10
  12   2   4   55.89    5.90
  12   2   4   52.19   10.60
  14  -2   4    3.50    7.30
  14  -2   4    8.00    6.60
 -14   2  -4    1.40    5.70
  14   2   4    9.20    9.20
  16  -2   4   71.59   13.70
  16  -2   4   41.70   11.90
  16   2   4   74.59   14.90
 -16   2  -4   59.99   11.10
  18  -2   4   -1.30    7.40
 -18   2  -4  -10.90    6.20
  18   2   4   -2.10   10.30
  20  -2   4   11.00   10.50
  20   2   4   -3.30   12.00
 -20   2  -4   -5.60    8.70
  22  -2   4   -5.50   10.30
  22   2   4   -6.00   11.90
  24  -2   4   26.50   14.50
  24   2   4   30.50   14.50
  27  -3  -4    2.80   12.80
 -27  -3   4  -17.70   15.00
 -27  -3   4    7.40    6.50
  27   3  -4    7.60   16.30
 -27   3   4   -7.80    4.20
 -25  -3   4    3.10   23.20
  25  -3  -4   39.20   16.00
 -25  -3   4   44.70    8.10
  25   3  -4   36.70    7.90
  25   3  -4   20.80   17.60
 -25   3   4   37.30    6.80
 -23  -3   4  195.58   31.90
 -23  -3   4  243.28   22.60
  23  -3  -4  264.17   29.70
  23   3  -4  194.38   32.50
  23   3  -4  220.48   22.80
 -23   3   4  269.67   22.20
 -21  -3   4  349.27   28.40
  21  -3  -4  351.46   34.00
  21   3  -4  268.07   28.30
 -21   3   4  333.67   28.10
  21   3  -4  293.97   36.70
 -19  -3   4  946.71   67.89
  19  -3  -4  976.00   72.29
 -19   3   4  940.81   82.09
 -19   3   4  800.22   67.59
  19   3  -4  712.83   67.89
  19   3  -4  699.33   73.59
  17  -3  -4  369.56   33.40
 -17  -3   4  390.86   29.90
  17   3  -4  280.37   35.60
 -17   3   4  347.27   38.40
  17   3  -4  324.37   29.90
 -17   3   4  346.47   29.90
 -15  -3   4  138.39   12.70
  15  -3  -4  135.69   15.40
  15  -3  -4  111.79   12.90
 -15  -3   4  141.69   18.20
 -15   3   4   89.69   12.30
  15   3  -4   92.49   12.30
 -15   3   4  138.49   13.80
 -13  -3   4  804.32   60.49
 -13  -3   4  717.33   55.79
  13  -3  -4  676.33   56.39
  13  -3  -4  743.63   57.39
  13   3  -4  625.04   55.79
 -13   3   4  630.84   61.49
 -13   3   4  704.73   56.39
  13   3  -4  676.33   60.59
  11  -3  -4 1611.64  130.99
 -11  -3   4 1848.72  134.69
  11  -3  -4 1884.61  131.79
 -11  -3   4 1760.32  130.89
 -11   3   4 1664.03  131.19
 -11   3   4 1472.55  135.39
  11   3  -4 1596.14  134.89
  11   3  -4 1556.84  130.89
  -9  -3   4 1288.47  121.19
   9  -3  -4 1689.63  119.79
  -9  -3   4 1646.54  123.09
   9  -3  -4 1527.35  119.69
  -9  -3   4 1695.73  119.69
   9   3  -4 1430.26  123.19
  -9   3   4 1401.36  123.79
   9   3  -4 1507.95  119.59
  -9   3   4 1576.44  119.89
  -7  -3   4 2752.22  234.98
  -7  -3   4 3344.77  233.18
   7  -3  -4 3393.06  232.78
  -7  -3   4 3006.30  235.88
   7  -3  -4 3049.99  233.08
  -7   3   4 2554.64  236.18
   7   3  -4 2819.82  236.18
   7   3  -4 3025.20  233.18
  -7   3   4 3110.79  233.28
  -5  -3   4  435.76   38.40
  -5  -3   4  433.16   39.00
   5  -3  -4  454.25   36.40
  -5  -3   4  492.05   36.50
  -5   3   4  478.65   36.60
  -5   3   4  394.36   39.40
   5   3  -4  491.15   36.60
   5   3  -4  421.66   39.30
  -3  -3   4 1223.48  102.99
  -3  -3   4 1406.06  100.79
  -3  -3   4 1342.97  102.79
   3  -3  -4 1391.06  100.79
  -3   3   4 1106.39  102.89
   3   3  -4 1147.89  102.49
   3   3  -4 1322.47  100.79
  -3   3   4 1378.06  100.99
  -1  -3   4 1032.60   78.49
   1  -3  -4 1139.79   78.59
  -1  -3   4 1027.10   80.69
   1  -3  -4 1035.60   78.89
   1   3  -4  892.01   80.49
  -1   3   4  888.31   78.69
  -1   3   4 1015.80   78.89
   1   3  -4 1001.70   78.59
   1  -3   4 2598.24  191.18
  -1  -3  -4 2693.83  189.38
   1  -3   4 2357.46  188.08
   1  -3   4 2437.76  188.58
  -1   3  -4 2487.05  189.18
   1   3   4 2279.17  189.08
   1   3   4 2311.67  189.58
  -1   3  -4 2345.67  191.18
  -3  -3  -4 1973.40  139.79
   3  -3   4 1819.12  138.19
   3  -3   4 1707.03  138.19
   3  -3   4 1869.81  141.19
  -3   3  -4 1786.52  141.29
   3   3   4 1686.53  138.99
  -3   3  -4 1722.73  138.19
   3   3   4 1715.53  139.89
  -5  -3  -4 2386.96  165.38
   5  -3   4 2273.07  166.78
   5  -3   4 1988.80  163.28
   5  -3   4 2015.10  162.88
  -5   3  -4 2123.39  166.38
  -5   3  -4 2075.09  162.88
   5   3   4 1903.91  163.38
   5   3   4 2108.39  165.38
   7  -3   4 1039.80   82.99
   7  -3   4  955.20   79.29
  -7  -3  -4 1072.39   81.59
  -7   3  -4 1040.90   82.49
  -7   3  -4  973.30   78.29
   7   3   4  994.90   81.69
   7   3   4  991.40   79.19
   9  -3   4  460.55   38.20
   9  -3   4  464.05   42.50
  -9  -3  -4  495.15   40.90
   9  -3   4  460.05   40.10
  -9   3  -4  489.15   41.50
   9   3   4  464.45   37.50
   9   3   4  430.66   40.90
  11  -3   4   95.79   11.90
  11  -3   4  100.19   17.60
 -11  -3  -4   99.49   14.80
  11  -3   4  100.09   14.10
 -11   3  -4  115.69   15.70
  11   3   4  119.09   10.50
  11   3   4   89.79   16.50
  13  -3   4  189.68   19.00
  13  -3   4  193.48   21.50
  13  -3   4  142.49   23.90
  13   3   4  220.28   17.00
 -13   3  -4  213.58   22.70
  13   3   4  192.88   23.50
  15  -3   4 1106.89  106.39
  15  -3   4 1292.37  105.09
 -15   3  -4 1419.66  106.69
  15   3   4 1350.96  106.99
  15   3   4 1264.97  100.19
  17  -3   4   19.30    9.70
  17  -3   4   18.20   19.80
  17   3   4    6.90   10.50
  17   3   4   13.50    4.20
 -17   3  -4   18.60    8.50
  19  -3   4  138.79   20.10
  19  -3   4   66.79   15.30
  19   3   4   76.39   16.60
 -19   3  -4   74.09   14.30
  21  -3   4   -9.10    8.70
  21   3   4  -16.20   11.10
  23  -3   4   15.00   12.40
  23   3   4    3.00   12.00
 -26  -4   4   -8.60    5.70
  26  -4  -4  -20.50   16.70
 -26  -4   4    1.00    6.60
  26   4  -4  -12.20   12.30
 -26   4   4   -8.00    4.30
 -24  -4   4   86.89   19.60
 -24  -4   4  140.99   15.80
 -24  -4   4  116.39   17.70
  24  -4  -4  111.09   18.90
  24   4  -4  160.88   46.60
 -24   4   4  139.69   14.20
  22  -4  -4  221.08   25.50
 -22  -4   4  205.58   19.30
  22   4  -4  158.88   28.90
  22   4  -4  151.38   19.00
 -22   4   4  193.58   18.50
 -20  -4   4  412.86   32.30
  20  -4  -4  406.46   36.50
  20   4  -4  329.77   39.70
  20   4  -4  326.37   32.30
 -20   4   4  359.86   31.90
 -18  -4   4  499.95   37.90
  18  -4  -4  507.15   41.00
  18   4  -4  372.16   37.20
  18   4  -4  393.16   44.50
 -18   4   4  435.66   37.40
  16  -4  -4  258.87   23.40
 -16  -4   4  244.48   20.80
 -16  -4   4  193.18   22.70
  16   4  -4  205.98   27.70
 -16   4   4  252.57   30.10
 -16   4   4  242.48   22.10
  16   4  -4  194.78   20.70
 -14  -4   4    1.20    4.10
  14  -4  -4    0.50    3.90
 -14  -4   4    2.70    3.50
  14  -4  -4    1.80    4.50
 -14  -4   4   -1.40    6.80
 -14   4   4   -2.00    4.00
  14   4  -4   -3.70    2.70
 -14   4   4    1.50    6.70
  14   4  -4    0.60    8.90
 -12  -4   4 1075.19   84.09
 -12  -4   4 1083.59   79.59
  12  -4  -4 1062.39   80.29
 -12  -4   4  895.91   81.39
  12  -4  -4 1044.90   80.59
  12   4  -4  943.31   79.49
 -12   4   4  980.70   85.29
 -12   4   4 1014.60   79.99
  12   4  -4  921.11   84.29
 -10  -4   4  411.96   40.80
 -10  -4   4  557.74   39.30
  10  -4  -4  495.35   39.20
  10  -4  -4  486.15   39.20
 -10  -4   4  482.65   43.20
 -10   4   4  457.75   44.50
  10   4  -4  419.66   43.80
 -10   4   4  483.55   39.40
  10   4  -4  472.75   39.10
   8  -4  -4 2219.58  161.68
  -8  -4   4 1980.80  163.98
   8  -4  -4 2089.59  161.98
  -8  -4   4 1980.70  165.18
  -8  -4   4 2299.67  162.08
  -8   4   4 2164.98  162.28
  -8   4   4 1906.11  165.98
   8   4  -4 1898.21  165.88
   8   4  -4 2138.59  162.08
  -6  -4   4 1479.95  104.49
  -6  -4   4 1364.76  106.59
   6  -4  -4 1343.97  104.29
  -6  -4   4 1173.68  107.09
   6   4  -4 1384.96  104.49
  -6   4   4 1286.17  108.09
   6   4  -4 1263.27  107.99
  -4  -4   4  937.41   67.29
   4  -4  -4  856.41   67.19
  -4  -4   4  908.81   69.59
  -4  -4   4  759.32   69.99
   4   4  -4  878.21   67.29
   4   4  -4  740.23   69.19
  -4   4   4  806.32   70.39
  -4   4   4  906.21   67.59
  -2  -4   4  310.67   27.40
   2  -4  -4  329.77   25.60
  -2  -4   4  309.07   24.90
   2  -4  -4  309.37   25.20
  -2   4   4  294.37   25.30
  -2   4   4  272.77   27.70
   2   4  -4  299.07   23.80
   2   4  -4  300.77   25.00
   2   4  -4  282.97   27.40
   0  -4  -4 1884.21  128.59
   0  -4   4 1570.74  126.59
   0  -4   4 1657.43  127.39
   0  -4   4 1786.02  130.29
   0  -4  -4 1642.84  127.89
   0   4  -4 1640.84  127.49
   0   4  -4 1601.94  127.19
   0   4  -4 1605.14  130.39
   0   4   4 1402.96  128.19
   0   4   4 1596.44  127.89
   2  -4   4 2372.76  191.78
   2  -4   4 2779.92  195.78
   2  -4   4 2537.95  192.28
   2   4   4 2334.17  193.88
   2   4   4 2434.36  192.88
  -2   4  -4 2464.85  192.28
  -2   4  -4 2379.66  191.78
  -2   4  -4 2636.54  195.98
   2   4   4 2411.16  193.48
   4  -4   4 2611.14  211.88
   4  -4   4 2936.91  215.88
   4  -4   4 2674.83  211.78
  -4  -4  -4 3101.39  214.18
   4   4   4 2488.15  212.28
   4   4   4 2506.05  214.08
  -4   4  -4 2703.13  211.88
   4   4   4 2919.41  212.48
   4   4   4 2536.95  212.58
  -4   4  -4 2912.81  215.98
   6  -4   4  876.01   77.09
  -6  -4  -4 1147.39   80.49
   6  -4   4  982.00   81.79
   6  -4   4  953.50   77.49
  -6   4  -4  990.80   77.19
   6   4   4  934.31   80.29
   6   4   4  966.20   77.79
  -6   4  -4 1065.69   81.69
   8  -4   4  231.88   26.80
  -8  -4  -4  272.87   24.90
   8  -4   4  257.87   21.90
   8   4   4  249.78   21.70
  -8   4  -4  278.07   26.30
   8   4   4  229.08   25.20
  -8   4  -4  251.77   20.70
  10  -4   4   41.10    6.50
 -10  -4  -4   60.79   11.20
  10  -4   4   42.20    8.70
  10  -4   4   24.40    9.20
  10   4   4   49.90   11.60
  10   4   4   38.80    5.80
 -10   4  -4   42.80   10.00
 -12  -4  -4  680.83   55.79
  12  -4   4  579.84   47.70
  12  -4   4  575.74   49.90
  12  -4   4  516.05   52.89
  12   4   4  533.65   51.49
  12   4   4  602.14   46.50
  14  -4   4  337.67   52.19
  14  -4   4  376.16   37.20
 -14   4  -4  445.66   39.90
  14   4   4  372.76   39.50
  14   4   4  418.26   33.00
  16  -4   4  381.76   44.50
  16  -4   4  477.75   41.40
  16   4   4  437.16   44.00
 -16   4  -4  471.55   43.10
  16   4   4  427.06   35.80
  18  -4   4  120.89   18.70
  18   4   4  105.69   11.20
  18   4   4   74.39   17.30
  20  -4   4    4.60   10.90
  20  -4   4    1.40    9.20
  20   4   4   -1.80    4.10
  20   4   4    3.00   21.40
  22  -4   4    0.90   11.00
  22   4   4   -1.20   13.40
 -27  -5   4   -3.00    6.90
 -27  -5   4    3.60    7.30
  27  -5  -4   10.80   13.50
  27   5  -4   -8.70   13.30
 -27   5   4    1.90    5.10
  25  -5  -4   -1.10   10.90
 -25  -5   4    9.20    7.20
 -25  -5   4    1.80    7.00
 -25   5   4    2.90    5.00
  25   5  -4   -6.50   12.30
 -23  -5   4   21.40    7.50
  23  -5  -4   30.60   12.30
 -23  -5   4   25.70    8.50
 -23   5   4   26.90    6.60
  23   5  -4   16.10   15.50
 -21  -5   4   -2.30    5.60
 -21  -5   4   -3.20    5.50
  21  -5  -4    3.10    9.30
 -21   5   4   -3.90    4.60
  21   5  -4  -10.30    9.90
 -19  -5   4   90.39   12.10
  19  -5  -4   95.79   14.90
 -19  -5   4   81.59   14.60
  19   5  -4   66.99   10.20
 -19   5   4   82.89   11.50
  19   5  -4   48.10   16.00
 -17  -5   4  119.49   13.60
  17  -5  -4  125.29   18.00
 -17  -5   4  107.29   15.40
 -17   5   4  107.89   14.20
  17   5  -4   88.39   13.00
  17   5  -4  120.69   22.70
  15  -5  -4   52.79    9.50
 -15  -5   4   39.70    8.00
 -15  -5   4   32.30    7.90
 -15   5   4   38.30    7.40
  15   5  -4   28.90   11.90
 -15   5   4   39.40   14.20
  15   5  -4   32.50    6.40
  13  -5  -4   15.10    5.20
 -13  -5   4    5.70    4.10
 -13  -5   4   22.20    9.30
  13  -5  -4   17.50    5.50
 -13  -5   4    9.90    5.30
 -13   5   4   16.60    5.10
  13   5  -4   11.70    6.80
 -13   5   4   10.60    8.30
  13   5  -4    4.80    9.30
  11  -5  -4  314.07   31.60
 -11  -5   4  341.57   32.10
 -11  -5   4  398.96   30.20
  11  -5  -4  366.36   30.20
  11   5  -4  329.87   36.00
 -11   5   4  365.16   30.50
  11   5  -4  335.37   29.90
  -9  -5   4  506.55   41.00
  -9  -5   4  507.75   43.30
  -9  -5   4  470.85   45.10
   9  -5  -4  471.25   40.80
  -9   5   4  546.65   41.60
   9   5  -4  457.15   46.20
   9   5  -4  506.75   41.10
  -9   5   4  507.15   46.50
  -7  -5   4    9.60    4.80
  -7  -5   4    8.60    7.10
  -7  -5   4    4.20    3.20
   7  -5  -4   -0.20    2.80
   7  -5  -4    1.70    6.90
  -7   5   4    3.20    3.50
   7   5  -4    2.60    2.80
   7   5  -4    4.60    4.10
   7   5  -4    5.70    6.90
  -7   5   4    6.70    6.40
  -5  -5   4   32.80    6.90
  -5  -5   4   30.40    5.20
   5  -5  -4   27.80    5.00
  -5  -5   4   28.90    9.80
   5  -5  -4   23.10    9.10
   5   5  -4   29.40    4.20
   5   5  -4   28.20    7.10
   5   5  -4   23.60    4.70
  -5   5   4   29.00    6.10
  -5   5   4   22.00    7.60
  -3  -5   4   97.79   15.80
   3  -5  -4   98.79   12.70
  -3  -5   4  120.89   14.30
  -3  -5   4  121.39   11.60
   3  -5  -4  103.99   11.00
  -3   5   4  108.89   15.80
   3   5  -4  103.89   14.10
   3   5  -4  107.79   11.30
   3   5  -4  107.69    9.90
  -3   5   4  124.49   12.00
   1  -5  -4  224.28   20.40
   1  -5  -4  243.98   22.20
  -1  -5   4  239.48   20.40
  -1  -5   4  221.88   19.00
  -1  -5   4  251.57   23.80
   1   5  -4  221.78   20.20
  -1   5   4  265.77   21.00
   1   5  -4  230.88   23.80
  -1   5   4  236.28   23.50
   1   5  -4  220.78   19.10
   1  -5   4 1195.38   98.09
  -1  -5  -4 1423.96  101.09
   1  -5   4 1274.57   99.09
  -1  -5  -4 1307.77   99.79
   1  -5   4 1357.56  102.69
  -1   5  -4 1236.38   98.29
   1   5   4 1197.58   99.39
  -1   5  -4 1271.07  102.79
   1   5   4 1062.99  100.59
   1   5   4 1302.17  100.99
  -1   5  -4 1282.27   99.09
   3  -5   4    4.50    2.20
   3  -5   4    1.60    2.90
  -3  -5  -4    7.40    5.30
   3  -5   4    1.00    4.90
  -3   5  -4    0.90    4.50
   3   5   4    6.50    3.50
   3   5   4    0.70    3.20
  -3   5  -4    3.70    2.60
   3   5   4   14.00    6.80
  -3   5  -4    3.20    2.60
   3   5   4    3.30    3.00
   5  -5   4   60.09   12.10
   5  -5   4   61.59    8.40
  -5  -5  -4   81.59   11.80
   5  -5   4   77.59    8.00
  -5   5  -4   78.39   12.80
   5   5   4   96.69   14.30
  -5   5  -4   79.79    8.10
  -5   5  -4   76.49    8.10
   5   5   4   64.99    8.80
   5   5   4   60.39    9.00
   7  -5   4   24.30    8.20
   7  -5   4   33.70    5.40
  -7  -5  -4   32.10    8.00
  -7   5  -4   28.90    8.00
   7   5   4   36.20    5.70
  -7   5  -4   33.90    4.70
   7   5   4   28.70    8.60
  -9  -5  -4    7.80    6.90
   9  -5   4    9.50    8.30
   9  -5   4    8.20    3.90
  -9   5  -4    2.30    2.70
  -9   5  -4    5.10    6.50
   9   5   4    8.10    3.60
   9   5   4   13.20    8.20
  11  -5   4   11.50    4.80
 -11  -5  -4    9.10    6.70
  11  -5   4   18.00    7.60
  11  -5   4   16.90    9.40
 -11   5  -4   16.30    3.30
 -11   5  -4   14.30    7.20
  11   5   4   20.20   10.50
  11   5   4   14.90    4.40
  13  -5   4    2.90    8.50
  13  -5   4   -5.80    8.60
  13  -5   4   -2.70    5.70
  13   5   4   -3.20    3.40
  13   5   4    2.20    9.70
 -13   5  -4    2.00    7.10
  15  -5   4   58.39   15.60
  15  -5   4   77.99   13.60
  15   5   4  103.89   19.30
  15   5   4   82.29   10.40
  17  -5   4   11.00   11.10
  17  -5   4   23.60    9.10
  17   5   4   19.40   12.70
  17   5   4   19.30    5.50
  19  -5   4  -14.10   10.50
  19  -5   4    5.30   14.60
  19   5   4   -8.50   10.40
  21  -5   4  -12.70   10.30
  21  -5   4   11.90   10.00
  21   5   4   18.90   14.20
  21   5   4   -1.00    5.10
  26  -6  -4    2.70   12.40
 -26  -6   4   -0.60    7.60
 -26  -6   4   -5.30    6.70
 -26   6   4   -0.20    5.10
  26   6  -4   -1.50   14.40
 -24  -6   4   18.10    8.00
  24  -6  -4   12.50   11.70
 -24  -6   4   23.00    8.30
 -24   6   4   20.90    6.90
  24   6  -4   16.10   14.60
 -22  -6   4   46.00   10.10
 -22  -6   4   45.90   10.30
  22  -6  -4   47.10   11.90
 -22   6   4   50.99    8.90
  22   6  -4   39.00   17.20
 -20  -6   4  155.28   17.40
  20  -6  -4  141.19   19.70
 -20  -6   4  149.99   19.00
  20   6  -4  106.59   23.50
 -18  -6   4  180.48   18.90
 -18  -6   4  179.18   21.00
  18  -6  -4  191.68   20.80
 -18   6   4  185.48   20.10
  18   6  -4  121.09   24.50
 -16  -6   4   35.90    7.50
 -16  -6   4   41.90    8.80
  16  -6  -4   33.30    9.90
  16   6  -4   28.80    7.50
 -16   6   4   31.10    7.90
  16   6  -4   19.60   11.20
 -14  -6   4   11.40    5.30
 -14  -6   4   14.60    6.30
  14  -6  -4   16.80    5.90
  14   6  -4   -2.10    9.30
  14   6  -4   14.90    4.80
 -14   6   4   20.50    6.60
  12  -6  -4  280.57   27.20
 -12  -6   4  284.87   32.60
  12  -6  -4  339.87   28.10
 -12  -6   4  338.57   29.90
 -12  -6   4  309.97   29.10
  12   6  -4  306.67   27.60
 -12   6   4  320.97   34.30
 -12   6   4  337.17   28.30
  12   6  -4  269.97   34.40
 -10  -6   4  455.75   39.70
 -10  -6   4  471.15   37.70
 -10  -6   4  412.46   41.90
  10   6  -4  426.46   37.70
 -10   6   4  465.95   39.80
  -8  -6   4 1550.74  112.59
  -8  -6   4 1342.47  115.59
   8  -6  -4 1308.27  109.69
  -8  -6   4 1447.96  109.99
   8   6  -4 1259.07  114.79
   8   6  -4 1383.86  110.09
  -8   6   4 1434.76  110.39
  -6  -6   4 1215.38  106.29
  -6  -6   4 1364.86  102.39
   6  -6  -4 1240.38  102.09
  -6  -6   4 1458.95  105.19
   6   6  -4 1321.67  101.29
  -6   6   4 1328.97  106.79
   6   6  -4 1281.87  102.39
   6   6  -4 1076.49  104.49
  -6   6   4 1379.56  102.79
   4  -6  -4  212.48   20.10
  -4  -6   4  182.28   24.30
  -4  -6   4  245.18   23.70
   4  -6  -4  221.68   23.00
  -4  -6   4  228.08   20.60
  -4   6   4  224.18   20.80
   4   6  -4  243.78   19.30
   4   6  -4  238.28   20.60
  -4   6   4  238.48   24.90
   4   6  -4  230.38   23.70
   2  -6  -4  349.17   29.90
  -2  -6   4  369.56   30.10
  -2  -6   4  367.36   29.00
  -2  -6   4  391.76   33.60
   2  -6  -4  304.47   31.40
   2   6  -4  324.77   33.20
  -2   6   4  363.56   33.40
  -2   6   4  356.76   30.40
   2   6  -4  346.27   28.80
   2   6  -4  372.96   30.10
   0  -6  -4  153.78   14.60
   0  -6   4  143.89   18.50
   0  -6   4  159.38   14.80
   0  -6  -4  150.18   17.10
   0  -6  -4  116.09   18.60
   0   6   4  124.79   16.60
   0   6   4  151.78   15.00
   0   6   4  160.38   17.40
   0   6  -4  160.98   14.50
   0   6  -4  162.28   18.70
   0   6   4  160.78   15.00
   0   6  -4  141.89   13.20
   2  -6   4 1598.14  128.49
   2  -6   4 1745.03  132.89
   2  -6   4 1531.55  127.49
  -2  -6  -4 1848.81  131.19
  -2   6  -4 1602.94  127.79
   2   6   4 1620.34  128.89
  -2   6  -4 1678.93  128.49
   2   6   4 1791.52  130.39
  -2   6  -4 1727.73  133.09
   2   6   4 1513.35  128.79
   2   6   4 1415.26  130.59
   4  -6   4  434.96   38.90
   4  -6   4  492.15   44.30
   4  -6   4  437.36   38.20
  -4  -6  -4  536.85   42.30
   4   6   4  412.56   42.00
  -4   6  -4  481.05   38.80
  -4   6  -4  469.55   38.50
   4   6   4  505.55   40.00
   4   6   4  479.85   39.50
  -4   6  -4  532.35   44.90
   4   6   4  463.25   39.50
  -6  -6  -4  416.16   32.80
   6  -6   4  344.67   35.20
   6  -6   4  323.27   28.10
   6  -6   4  284.57   28.30
   6   6   4  295.27   32.60
   6   6   4  332.07   29.10
  -6   6  -4  358.06   28.50
  -6   6  -4  313.67   33.10
   6   6   4  378.56   28.80
  -6   6  -4  344.97   28.30
   8  -6   4  329.57   29.00
   8  -6   4  344.97   36.30
   8   6   4  306.87   33.90
  -8   6  -4  367.46   34.80
  -8   6  -4  334.87   28.50
   8   6   4  341.87   30.20
   8   6   4  372.46   29.80
 -10  -6  -4    3.20    7.30
  10  -6   4   11.90    7.90
  10  -6   4    8.20    8.90
  10   6   4    8.20    9.10
 -10   6  -4    8.80    3.50
 -10   6  -4    6.50    7.20
  10   6   4    6.10    4.10
  12  -6   4  114.59   15.80
  12  -6   4   86.59   18.60
  12  -6   4   92.99   12.70
  12   6   4   68.89   15.50
  12   6   4  110.89   13.40
 -12   6  -4  110.69   10.40
  14  -6   4   26.00   12.90
  14  -6   4   33.50   10.40
  14   6   4   21.00   11.00
 -14   6  -4   52.49    7.50
  16  -6   4    9.70   11.30
  16  -6   4   11.30    8.70
  16   6   4   37.00   15.10
  16   6   4   23.90    6.10
  18  -6   4   95.79   18.00
  18  -6   4   45.60   16.20
  18   6   4   71.99   18.60
  18   6   4   54.29    8.70
  20  -6   4   10.90   10.00
  20  -6   4   -6.60   11.30
  20   6   4   -6.70   12.40
  20   6   4    0.00    5.30
  22  -6   4  -14.20   11.10
  22  -6   4   10.80   11.60
  22   6   4   24.40   15.70
 -25  -7   4    6.10    8.10
 -25  -7   4   -1.90    6.60
  25  -7  -4    4.70   20.80
 -25   7   4    1.00    5.80
  25   7  -4   23.50   15.00
  23  -7  -4   90.49   16.20
 -23  -7   4   94.09   15.80
 -23  -7   4   66.99   12.30
  23   7  -4   93.29   24.00
 -23   7   4   79.99   11.80
  21  -7  -4  227.28   26.30
 -21  -7   4  239.28   24.40
 -21  -7   4  231.08   25.30
  21   7  -4  234.98   45.00
 -19  -7   4  307.77   29.50
 -19  -7   4  308.47   28.10
  19  -7  -4  272.07   29.40
  19   7  -4  238.58   36.90
 -19   7   4  294.97   28.80
 -17  -7   4  541.95   45.50
  17  -7  -4  537.25   45.10
 -17  -7   4  541.35   43.80
  17   7  -4  394.76   50.39
 -17   7   4  472.35   44.10
  15  -7  -4   13.80    6.60
 -15  -7   4   19.30    7.00
 -15  -7   4   20.80    7.20
  15   7  -4    4.70   12.40
 -15   7   4   11.00    6.20
 -13  -7   4   63.59    9.50
  13  -7  -4   32.10   14.40
  13  -7  -4   73.49   10.50
 -13  -7   4   89.99   13.30
  13   7  -4   32.00   13.10
 -13   7   4   51.89    9.00
 -11  -7   4  896.31   69.99
  11  -7  -4  984.40   73.19
 -11  -7   4  821.02   67.49
  11   7  -4  771.72   67.49
  11   7  -4  730.13   73.79
 -11   7   4  811.52   67.99
  -9  -7   4 2139.19  182.78
  -9  -7   4 2302.67  178.28
   9  -7  -4 2135.19  177.88
  -9  -7   4 2477.55  180.88
   9   7  -4 2293.37  178.48
   9   7  -4 2105.39  184.08
   9   7  -4 2317.17  177.28
  -9   7   4 2414.56  178.78
  -9   7   4 2270.57  183.58
  -7  -7   4 2462.85  197.18
   7  -7  -4 2222.68  192.38
  -7  -7   4 2174.88  196.78
  -7  -7   4 2680.63  195.78
   7   7  -4 2462.95  191.78
  -7   7   4 2656.73  194.08
  -7   7   4 2576.24  197.88
   7   7  -4 2503.95  193.08
  -5  -7   4 1046.70   82.99
  -5  -7   4 1165.98   86.39
   5  -7  -4  906.01   83.79
  -5  -7   4  916.21   89.09
   5   7  -4 1059.29   81.79
  -5   7   4 1138.59   87.59
   5   7  -4 1083.99   83.29
  -5   7   4 1107.49   83.49
   5   7  -4  916.51   85.89
  -3  -7   4   69.39    9.80
   3  -7  -4   53.49   12.20
   3  -7  -4   80.09   11.90
   3  -7  -4   75.59    9.90
  -3  -7   4   90.09   13.80
   3   7  -4   81.69   10.30
   3   7  -4   77.89   12.90
  -3   7   4   92.29   14.10
   3   7  -4   73.59    8.30
  -3   7   4   71.79   10.00
   1  -7  -4  129.99   16.90
  -1  -7   4  145.49   13.10
   1  -7  -4  140.39   15.50
   1  -7  -4  100.39   19.00
  -1  -7   4  141.19   14.70
  -1  -7   4  170.48   19.30
   1   7  -4  177.58   21.00
   1   7  -4  141.09   14.40
  -1   7   4  143.09   15.10
  -1   7   4  159.48   17.80
   1   7  -4  150.98   13.30
   1  -7   4 2960.30  219.28
  -1  -7  -4 2726.63  216.88
   1  -7   4 2530.95  213.28
  -1  -7  -4 2668.03  216.08
   1  -7   4 2583.24  214.48
   1   7   4 2773.62  214.98
  -1   7  -4 2796.92  219.38
  -1   7  -4 2823.32  214.68
  -1   7  -4 2760.42  213.68
   1   7   4 2961.10  217.08
   1   7   4 2744.93  216.68
  -3  -7  -4 1497.95  117.09
   3  -7   4 1302.67  113.99
   3  -7   4 1676.53  125.39
   3  -7   4 1335.47  112.99
  -3   7  -4 1530.65  114.19
   3   7   4 1176.68  116.49
  -3   7  -4 1527.05  119.29
  -3   7  -4 1447.16  113.49
   3   7   4 1582.84  115.89
   3   7   4 1454.25  114.79
   5  -7   4 1320.17  118.89
   5  -7   4 1384.16  118.29
   5  -7   4 1570.14  125.19
  -5  -7  -4 1681.33  122.99
   5   7   4 1686.03  120.19
   5   7   4 1285.97  122.39
  -5   7  -4 1586.44  118.99
   5   7   4 1566.14  119.69
   5   7   4 1454.75  119.59
  -5   7  -4 1529.35  118.69
  -5   7  -4 1593.04  124.59
   7  -7   4  476.85   44.70
  -7  -7  -4  512.75   44.10
   7  -7   4  417.66   36.10
   7   7   4  424.36   37.10
   7   7   4  416.96   38.30
  -7   7  -4  447.56   36.60
  -7   7  -4  457.65   36.50
   7   7   4  386.06   41.50
   7   7   4  425.06   37.30
  -9  -7  -4   51.19   11.30
   9  -7   4   35.40   13.20
  -9   7  -4   47.30    7.10
   9   7   4   53.59   14.80
   9   7   4   39.70    7.70
   9   7   4   47.10    7.80
  11  -7   4  101.99   21.60
  11  -7   4  147.19   15.40
 -11   7  -4  156.68   14.30
  11   7   4  161.68   15.70
  11   7   4  100.99   19.50
  13  -7   4  119.19   17.50
  13   7   4  113.09   13.90
 -13   7  -4  106.99   11.90
  15  -7   4  188.08   23.40
 -15   7  -4  199.08   16.70
  15   7   4  135.39   25.00
  15   7   4  180.18   19.10
  17  -7   4   81.09   14.70
  17  -7   4   69.19   19.20
  17   7   4   80.79   17.80
  19  -7   4   31.90   15.90
  19  -7   4   68.19   16.40
  19   7   4   33.10   15.00
  21  -7   4  -11.30   11.50
  21  -7   4    8.00   11.10
  21   7   4    2.90   13.10
  24  -8  -4   -5.10   10.00
 -24  -8   4   -2.10    7.80
 -24  -8   4  -10.90    6.20
 -24   8   4  -13.20    5.00
  24   8  -4    9.40   14.60
 -22  -8   4   -2.30    6.50
  22  -8  -4    6.50    8.80
 -22  -8   4   10.00    7.90
  22   8  -4    2.70   14.40
  20  -8  -4   45.80   11.80
 -20  -8   4   50.99   10.30
 -20  -8   4   55.59   11.20
 -20   8   4   58.09   11.70
 -18  -8   4  151.28   19.20
  18  -8  -4  146.79   19.00
 -18  -8   4  129.99   17.60
 -18   8   4  137.39   18.10
  18   8  -4   86.49   22.90
 -16  -8   4   41.70    9.20
  16  -8  -4   33.90    9.40
 -16  -8   4   43.30    9.70
  16   8  -4   21.40   13.00
 -16   8   4   31.30    8.60
  14  -8  -4   17.30    7.20
 -14  -8   4   17.80    6.80
  14  -8  -4   21.60   14.20
 -14  -8   4   17.70    7.50
  14   8  -4   23.40   13.10
 -14   8   4   21.10    8.30
 -12  -8   4  131.39   16.10
 -12  -8   4  169.28   19.10
  12  -8  -4   97.19   22.60
 -12   8   4  140.09   16.50
  12   8  -4   93.39   20.60
 -10  -8   4  258.17   25.70
 -10  -8   4  219.88   22.70
  10   8  -4  235.48   21.10
  10   8  -4  190.38   30.00
 -10   8   4  241.48   23.20
  -8  -8   4  811.52   62.79
  -8  -8   4  722.63   59.39
   8  -8  -4  680.33   59.69
   8   8  -4  613.34   66.29
   8   8  -4  736.43   57.99
  -8   8   4  746.23   59.69
   6  -8  -4  246.38   35.20
  -6  -8   4  370.36   32.80
  -6  -8   4  325.77   29.10
  -6  -8   4  301.67   33.70
   6  -8  -4  315.67   28.10
   6  -8  -4  273.47   30.00
  -6   8   4  358.56   29.60
  -6   8   4  325.57   28.90
  -6   8   4  371.66   34.60
   6   8  -4  282.07   33.90
   6   8  -4  352.86   27.70
   6   8  -4  352.36   29.10
   4  -8  -4  205.38   30.00
   4  -8  -4  238.88   22.30
  -4  -8   4  212.98   27.10
   4  -8  -4  252.97   25.00
  -4  -8   4  268.47   27.70
  -4  -8   4  230.38   22.90
  -4   8   4  273.07   23.70
  -4   8   4  264.07   27.40
   4   8  -4  238.28   26.80
  -4   8   4  231.68   22.80
   4   8  -4  270.47   23.10
   4   8  -4  265.77   21.70
  -2  -8   4    9.70    6.80
   2  -8  -4    9.50    4.30
   2  -8  -4    8.90    8.60
   2  -8  -4   14.50    7.70
  -2  -8   4   10.90    5.00
  -2  -8   4   23.70    9.20
  -2   8   4   13.00    5.00
   2   8  -4    9.50    5.70
   2   8  -4   13.50    3.90
  -2   8   4   12.00    6.50
  -2   8   4    9.00    5.60
   2   8  -4   13.30    4.50
   0  -8  -4  660.33   56.39
   0  -8  -4  672.33   58.99
   0  -8   4  743.53   61.59
   0  -8   4  665.33   54.99
   0   8  -4  709.83   56.59
   0   8  -4  706.03   55.49
   0   8  -4  701.93   61.29
   0   8   4  669.73   56.79
   0   8   4  647.24   56.69
   0   8   4  744.83   59.69
   2  -8   4  575.64   50.19
   2  -8   4  482.95   44.00
  -2  -8  -4  527.25   47.20
   2  -8   4  506.15   42.50
   2   8   4  464.75   47.30
  -2   8  -4  541.85   43.20
   2   8   4  522.95   44.40
  -2   8  -4  565.64   44.10
   2   8   4  522.25   44.40
  -2   8  -4  575.84   49.70
   4  -8   4  253.77   27.00
   4  -8   4  293.97   25.80
   4  -8   4  334.87   34.60
  -4  -8  -4  345.57   32.00
   4   8   4  348.77   29.20
   4   8   4  310.87   27.70
  -4   8  -4  331.27   26.70
  -4   8  -4  333.47   33.00
   4   8   4  235.48   31.00
   4   8   4  287.97   27.50
  -6  -8  -4  731.83   57.89
   6  -8   4  650.43   60.59
   6  -8   4  582.34   51.99
  -6   8  -4  656.43   52.79
   6   8   4  603.24   53.39
   6   8   4  486.65   59.69
  -6   8  -4  680.03   52.79
   6   8   4  691.83   53.89
   6   8   4  714.33   56.19
   8  -8   4   -1.40   10.20
  -8  -8  -4    0.20    8.00
   8   8   4   -3.70    3.80
  -8   8  -4  -10.60    4.10
  -8   8  -4    8.70    5.40
   8   8   4  -13.60    9.10
   8   8   4    1.80    4.90
  10  -8   4   -1.70    4.50
  10  -8   4    6.00   11.90
  10   8   4    4.40    9.80
 -10   8  -4    3.80    4.90
  10   8   4   20.50    7.10
  12  -8   4   46.00   16.80
  12   8   4   74.79   12.00
  12   8   4   65.89   16.90
 -12   8  -4   66.99    9.00
  14  -8   4   92.19   22.70
  14  -8   4  157.38   20.80
  14   8   4  130.39   24.30
 -14   8  -4  160.98   15.00
  16  -8   4   24.50   16.20
  16  -8   4   24.80   10.70
 -16   8  -4   21.00    5.40
  16   8   4   13.60   12.60
  18  -8   4   -5.90    8.20
  18  -8   4  -15.80   11.80
  18   8   4   -5.70   11.20
  20  -8   4   -5.30   13.30
  20  -8   4    0.00    9.30
  20   8   4  -13.20   10.90
  23  -9  -4   36.90   12.50
 -23  -9   4   31.70   11.40
 -23  -9   4   30.00    9.10
  23   9  -4   34.30   18.10
 -21  -9   4   38.20   10.00
  21  -9  -4   48.50   12.50
 -21  -9   4   73.09   12.30
 -21   9   4   44.80   11.40
  21   9  -4   30.30   16.90
  19  -9  -4    5.20    7.90
 -19  -9   4    8.20    6.90
 -19  -9   4    1.40    7.00
  19   9  -4  -18.10   12.70
 -17  -9   4    9.60    7.50
  17  -9  -4   14.00    7.50
 -17  -9   4   12.00    8.00
 -17   9   4   19.30    8.50
  17   9  -4  -14.20   11.20
  15  -9  -4   20.10   15.00
  15  -9  -4    6.50    7.10
 -15  -9   4   -2.80    7.00
 -15  -9   4   -3.60    6.00
 -15   9   4   13.20    6.80
  15   9  -4   -4.80   11.00
  13  -9  -4   21.00   13.40
 -13  -9   4   16.80    7.80
 -13  -9   4   19.30   10.40
 -13   9   4   14.20    7.50
  13   9  -4    2.70   12.60
  13   9  -4   27.30    6.40
  11  -9  -4    3.70   10.30
 -11  -9   4   -6.20    5.70
 -11  -9   4    5.10   12.00
  11   9  -4    4.70    5.30
  11   9  -4    4.70   12.30
 -11   9   4    8.50    6.40
  -9  -9   4   -0.10    5.30
  -9  -9   4    9.30    8.00
   9  -9  -4    0.40   11.10
   9   9  -4    7.20    4.70
   9   9  -4    1.70    5.00
  -9   9   4    7.30    6.30
   7  -9  -4  123.59   17.70
  -7  -9   4  143.29   20.20
  -7  -9   4  127.19   16.40
   7   9  -4  120.59   18.60
   7   9  -4  156.28   14.40
  -7   9   4  136.69   16.40
   5  -9  -4   11.80    9.70
  -5  -9   4   19.10    7.80
   5  -9  -4   11.60    7.90
  -5  -9   4   16.50    5.90
   5   9  -4   14.90    7.30
   5   9  -4   19.60    5.20
  -5   9   4    8.90    6.00
   3  -9  -4   35.60    9.80
  -3  -9   4   31.30   10.40
   3  -9  -4    6.20    9.40
  -3  -9   4   10.80    5.20
  -3   9   4   20.00    8.10
   3   9  -4   26.80    5.40
   3   9  -4   16.30    8.70
  -3   9   4   20.50    6.40
  -1  -9   4   30.90    5.30
  -1  -9   4   22.40    9.70
   1  -9  -4   27.80   10.10
   1  -9  -4    4.90   11.00
  -1  -9   4   14.50    6.20
  -1   9   4   20.90    8.00
   1   9  -4   27.20    5.70
  -1   9   4   34.40    7.80
   1  -9   4    8.80    5.50
  -1  -9  -4    6.20    7.30
  -1  -9  -4    6.90    8.40
   1  -9   4   14.00    4.20
   1  -9   4    6.70    7.90
  -1   9  -4    7.90    5.00
   1   9   4   10.20    5.30
   1   9   4    7.50    6.40
  -1   9  -4    8.50    4.60
   3  -9   4  144.99   17.20
  -3  -9  -4  128.79   23.10
   3  -9   4  154.58   14.80
   3  -9   4  174.58   24.90
  -3   9  -4  168.98   16.80
   3   9   4  171.28   19.30
   3   9   4  173.18   17.70
  -3   9  -4  155.48   15.90
   3   9   4  143.69   22.10
  -5  -9  -4   54.69   14.50
  -5  -9  -4   29.70   11.30
   5  -9   4   36.80    6.30
   5  -9   4   24.60   11.90
  -5   9  -4   42.20    7.90
   5   9   4   35.40    8.00
  -5   9  -4   43.00    7.70
   5   9   4   47.80   13.10
   7  -9   4   74.49   18.10
   7  -9   4  104.29   11.60
  -7  -9  -4   73.69   14.70
   7   9   4  100.09   13.50
   7   9   4  115.19   20.80
   7   9   4  123.19   14.20
  -7   9  -4  113.99   13.10
  -7   9  -4  101.69   12.80
   9  -9   4    7.20    5.20
   9  -9   4    5.60   11.40
  -9   9  -4    4.40    4.80
   9   9   4   10.50    4.90
   9   9   4   12.20   10.10
   9   9   4    3.30    5.50
  -9   9  -4    8.00    5.80
  11  -9   4   -1.90   11.90
 -11   9  -4    1.30    5.00
  11   9   4   13.30    6.40
  11   9   4   -6.60   10.00
  13  -9   4   68.29   19.60
  13   9   4  119.29   15.10
  13   9   4  112.39   22.80
 -13   9  -4  128.09   18.40
  15  -9   4   -2.90   13.30
  15  -9   4    8.80   11.10
  15   9   4    2.20   12.10
  15   9   4    9.50    6.70
  17  -9   4  159.08   21.70
  17  -9   4   74.19   22.90
  17   9   4  104.39   22.80
 -17   9  -4   93.99   13.50
  17   9   4  130.99   17.20
  19   9   4   27.30   16.60
 -20 -10   4  254.67   38.40
  20 -10  -4  287.97   29.80
  20  10  -4  236.08   37.50
 -20  10   4  269.47   29.50
 -18 -10   4  188.48   23.50
  18 -10  -4  195.68   23.80
 -18 -10   4  216.18   26.10
 -18  10   4  229.98   24.30
  18  10  -4  197.68   21.70
 -16 -10   4  105.09   17.90
 -16 -10   4   89.49   14.30
  16 -10  -4  100.89   15.20
 -16  10   4   77.89   14.00
  16  10  -4   74.39   11.90
  16  10  -4   52.69   20.30
 -14 -10   4   21.10    8.90
  14 -10  -4    9.10   12.90
  14 -10  -4   17.60    7.80
 -14 -10   4   11.90    6.90
 -14  10   4   22.00    8.80
  14  10  -4   29.60    7.40
  14  10  -4   23.20   14.70
 -12 -10   4   95.79   17.90
 -12 -10   4   71.89   11.80
  12 -10  -4   49.40   19.10
  12  10  -4   76.09   19.70
  12  10  -4   89.09   11.90
 -12  10   4   96.69   14.90
 -10 -10   4  729.43   69.19
 -10 -10   4  915.91   73.49
  10  10  -4  872.71   68.09
 -10  10   4  833.52   69.89
  -8 -10   4  237.48   24.10
   8 -10  -4  192.48   28.90
  -8 -10   4  242.48   28.30
   8  10  -4  236.78   21.90
  -8  10   4  232.58   24.10
   6 -10  -4 1375.46  132.29
  -6 -10   4 1778.52  135.69
  -6 -10   4 1544.05  130.89
  -6  10   4 1751.62  131.59
   6  10  -4 1770.12  129.79
  -4 -10   4  211.18   26.30
  -4 -10   4  159.88   19.70
   4 -10  -4  193.18   23.20
  -4  10   4  182.08   19.90
   4  10  -4  166.08   17.90
   2 -10  -4    1.90   10.80
  -2 -10   4   16.50    7.10
   2 -10  -4   27.00    9.90
  -2 -10   4   24.20   10.40
   2  10  -4   26.40    6.60
  -2  10   4   18.30    7.10
   0 -10   4  268.17   22.40
   0 -10   4  231.68   24.50
   0 -10   4  246.68   31.40
   0 -10  -4  191.88   31.80
   0  10   4  262.27   25.00
   0  10  -4  255.27   23.20
   0  10   4  275.77   28.60
  -2 -10  -4  562.04   52.49
   2 -10   4  552.74   46.80
   2 -10   4  502.15   48.50
   2 -10   4  567.94   55.59
   2  10   4  642.24   51.79
  -2  10  -4  585.44   47.80
   2  10   4  605.24   49.10
  -4 -10  -4  705.63   60.69
   4 -10   4  633.04   63.49
   4  10   4  679.33   57.79
   4  10   4  629.74   55.99
  -4  10  -4  697.93   55.19
   6 -10   4  472.35   40.70
   6 -10   4  495.65   51.59
  -6 -10  -4  398.66   46.70
   6  10   4  441.66   48.00
   6  10   4  524.45   43.80
   6  10   4  520.65   42.70
  -6  10  -4  563.44   42.50
   8 -10   4   22.20    6.70
   8 -10   4   26.30   14.20
   8  10   4   20.20   12.40
   8  10   4   21.70    7.00
   8  10   4   15.90    6.20
  -8  10  -4   26.30    7.30
  10 -10   4   18.30   13.90
 -10  10  -4   35.00    8.70
  10  10   4   29.70    8.70
  10  10   4   19.20   13.60
  10  10   4   11.60    5.00
  12 -10   4  240.58   39.10
  12  10   4  243.08   35.10
 -12  10  -4  282.87   26.50
  12  10   4  293.57   27.50
  14  10   4  241.28   26.20
  14  10   4  244.18   34.40
 -14  10  -4  265.37   24.70
  16 -10   4   76.19   21.60
  16 -10   4  169.98   22.70
 -16  10  -4  107.99   15.90
  16  10   4  130.89   25.70
  19 -11  -4  219.28   26.40
 -19 -11   4  207.08   25.60
 -19 -11   4  236.08   27.60
 -19  11   4  222.58   26.00
  19  11  -4  211.08   23.40
  19  11  -4  181.18   35.90
  17 -11  -4   79.09   13.30
 -17 -11   4   48.10   11.70
 -17 -11   4   74.19   14.20
 -17  11   4   89.19   15.80
  17  11  -4   69.19   11.80
  17  11  -4   59.09   21.80
 -15 -11   4   -3.60    7.20
 -15 -11   4    0.40    8.50
  15 -11  -4   -3.70   12.70
  15 -11  -4    4.20    6.60
  15  11  -4   -5.80    4.90
  15  11  -4  -19.00   10.10
 -15  11   4   -3.30    8.00
 -13 -11   4   -6.80    5.90
  13 -11  -4   -1.20   13.20
 -13 -11   4    9.10    8.80
 -13  11   4   -6.10    6.20
  13  11  -4   -0.40    5.20
 -11 -11   4  277.37   30.00
 -11 -11   4  289.67   34.20
  11  11  -4  340.97   28.50
 -11  11   4  310.47   30.50
  -9 -11   4  141.19   22.90
  -9 -11   4  114.09   17.10
   9 -11  -4  113.89   18.60
  -9  11   4  142.49   19.20
   9  11  -4  137.49   15.20
   7 -11  -4  298.07   33.90
  -7 -11   4  284.37   31.40
  -7 -11   4  369.76   37.70
  -7  11   4  358.66   32.10
   7  11  -4  360.66   30.30
   5 -11  -4  411.26   41.10
  -5 -11   4  462.35   45.00
  -5 -11   4  360.96   38.30
  -5  11   4  488.55   39.30
   3 -11  -4  172.08   20.80
  -3 -11   4  126.49   23.80
   3 -11  -4   72.89   21.00
  -3 -11   4  104.69   16.30
  -3  11   4  147.49   16.70
   3  11  -4  116.39   14.70
  -1 -11   4   13.50   11.40
   1 -11  -4   32.10   10.40
  -1 -11   4   12.80    7.70
   1 -11  -4   11.30   11.90
   1  11  -4    7.70    6.30
  -1  11   4   29.80    8.00
   1 -11   4  240.28   22.20
  -1 -11  -4  179.88   31.80
   1 -11   4  224.88   32.10
  -1 -11  -4  258.57   28.90
  -1  11  -4  280.37   24.30
   1  11   4  280.37   25.30
   3 -11   4  492.65   42.70
   3 -11   4  490.25   52.89
   3  11   4  516.35   45.00
  -3  11  -4  537.95   44.30
   3  11   4  538.05   47.40
   5 -11   4  542.45   50.39
   5 -11   4  607.64   61.79
  -5  11  -4  696.83   52.19
   5  11   4  638.34   52.89
   5  11   4  618.64   54.29
  -7 -11  -4   49.80   14.30
   7 -11   4   56.09   18.10
   7  11   4   63.89   17.70
   7  11   4   93.59   13.80
   7  11   4   67.09   13.40
  -7  11  -4   85.79   12.10
   9 -11   4   -4.40   11.60
  -9  11  -4   -0.20    5.80
   9  11   4   -4.10    6.20
   9  11   4  -10.10   10.00
   9  11   4   -4.60    4.50
  11 -11   4   58.29   20.00
  11  11   4   92.79   18.60
 -11  11  -4  108.59   14.60
  11  11   4   67.89   18.70
  13 -11   4  261.67   46.10
  13  11   4  336.37   41.20
  13  11   4  421.16   34.70
  15 -11   4  201.88   26.00
  15  11   4  135.69   27.80
  15  11   4  190.88   22.70
 -16 -12   4   14.00    9.60
  16 -12  -4   -3.10   15.30
  16 -12  -4   20.00    9.90
 -16 -12   4    8.60   10.10
 -16  12   4    9.30    9.50
  16  12  -4   14.10    8.00
  16  12  -4   20.40   15.80
 -14 -12   4   29.90   11.80
  14 -12  -4    3.80   14.30
 -14 -12   4   20.80    8.70
 -14  12   4   23.70    9.90
  14  12  -4   31.80    8.50
  12 -12  -4   -6.20   13.00
 -12 -12   4    3.20    7.10
 -12 -12   4    2.60    9.20
  12  12  -4    2.30    5.50
 -12  12   4   17.00    9.70
 -10 -12   4    5.50    9.20
  10 -12  -4  -13.20   11.40
 -10 -12   4   15.40    8.20
  10  12  -4   11.60    6.20
 -10  12   4   14.30    8.00
  -8 -12   4   -2.20    5.40
  -8 -12   4   -2.30    8.30
   8 -12  -4   -2.50   12.70
   8  12  -4   -3.80    5.00
  -8  12   4   -6.00    6.20
   6 -12  -4   -1.00   11.80
  -6 -12   4    9.60    9.90
  -6 -12   4    0.40    5.70
  -6  12   4    1.50    7.70
   6  12  -4   15.10    6.20
  -4 -12   4   -6.90    9.10
  -4 -12   4   -9.30    6.20
   4 -12  -4   -6.90   11.10
   4  12  -4   -1.10    5.10
  -4  12   4   -4.70    6.70
  -2 -12   4   43.10   14.30
  -2 -12   4   26.70    9.40
   2 -12  -4   30.20   14.30
  -2  12   4   46.60    9.70
   2  12  -4   63.09    9.80
   0 -12   4   -4.10    4.70
   0 -12  -4   -5.30   10.10
   0 -12   4   -0.50   10.80
   0  12   4    6.20    7.80
   0  12  -4    5.80    5.90
   2 -12   4    9.00   12.50
  -2 -12  -4    0.90   12.20
   2 -12   4   15.50    5.60
   2  12   4   25.20    8.20
  -2  12  -4   18.60    6.90
  -4 -12  -4   -9.50   10.60
   4 -12   4   -9.90   10.70
   4  12   4    2.70    6.90
  -4  12  -4    0.30    5.40
   6 -12   4   13.90   23.80
  -6 -12  -4   12.20   12.10
   6  12   4   24.30    8.50
   6  12   4   25.00    8.60
  -6  12  -4   43.90    8.70
   8 -12   4    6.20   13.70
  -8  12  -4   27.30    8.00
   8  12   4   12.70    7.20
   8  12   4   46.00   15.90
   8  12   4   18.80   14.70
  10 -12   4   -2.50   14.70
  10  12   4    4.00    7.90
  10  12   4    4.90   11.50
 -10  12  -4    5.70    7.40
  10  12   4    6.40    5.80
  12 -12   4    2.50   15.60
 -12  12  -4   28.10    9.80
  12  12   4   10.80   20.80
  12  12   4   16.00    9.70
 -15 -13   4    5.20    8.20
 -15 -13   4    3.20   10.10
  15 -13  -4  -16.60   14.40
 -15  13   4    1.60    8.80
  15  13  -4    6.20    7.10
  13 -13  -4   -3.40   15.20
 -13 -13   4   13.00   11.10
 -13 -13   4    5.80    8.10
 -13  13   4    6.70    9.80
  13  13  -4   20.70    8.00
  11 -13  -4   25.40   16.90
 -11 -13   4   67.19   15.70
 -11 -13   4   51.99   11.00
  11  13  -4   72.89   11.90
 -11  13   4   62.49   12.20
  -9 -13   4   88.59   18.30
  -9 -13   4   61.79   13.40
   9 -13  -4   39.60   18.30
  -9  13   4   97.99   23.30
   9  13  -4  117.79   14.70
  -7 -13   4  260.87   30.50
  -7 -13   4  296.87   37.50
  -7  13   4  329.67   31.40
   7  13  -4  327.07   29.10
  -5 -13   4   23.20    8.90
  -5 -13   4    9.40   10.70
   5 -13  -4    8.70   13.90
  -5  13   4   15.60    8.60
   5  13  -4   26.70    8.40
   3 -13  -4    2.10   13.30
  -3 -13   4   33.60   14.30
   3  13  -4   41.40    8.80
  -3  13   4   30.90   11.20
  -1 -13   4    7.60   10.90
   1 -13  -4   14.30   14.40
  -1  13   4   21.50    9.50
   1  13  -4   17.30    7.10
   1 -13   4   85.79   27.20
  -1  13  -4   90.09   13.00
   1  13   4   85.29   14.30
   3 -13   4   82.29   21.20
  -3  13  -4  104.29   15.00
   3  13   4  121.59   17.70
   5 -13   4   79.09   19.70
  -5 -13  -4   68.49   19.30
   7 -13   4  179.08   36.40
  -7  13  -4  231.98   23.70
   7  13   4  226.18   24.70
   9 -13   4    5.60   15.50
   9  13   4   35.30   10.70
   9  13   4    1.60    7.50
  -9  13  -4   35.80   10.20
 -10 -14   4  150.08   22.80
 -10 -14   4  161.68   29.70
 -10  14   4  158.38   23.10
  10  14  -4  224.58   21.60
  -8 -14   4  399.26   46.60
   8  14  -4  396.86   37.30
  -8  14   4  436.06   40.20
  -6 -14   4  178.78   33.60
  -6  14   4  191.38   23.60
   6  14  -4  177.28   21.30
  -4 -14   4   72.09   23.70
   4 -14  -4   65.79   26.90
   4  14  -4  113.19   15.50
  -4  14   4   93.09   15.10
   2 -14  -4   -3.90   13.90
  -2 -14   4   -6.30   10.30
  -2  14   4   -6.90    7.40
   2  14  -4    2.40    7.20
   0 -14  -4   13.20   15.20
   0 -14   4   32.20   16.20
   0  14  -4   49.60   10.70
   0  14   4   33.10   10.50
   2 -14   4  390.66   51.69
   2  14   4  447.66   42.00
  -2  14  -4  497.65   40.90
  -4  14  -4  290.27   28.70
   4  14   4  282.27   30.10
  -6 -14  -4   72.79   19.80
   6 -14   4   74.49   20.60
  28   0  -5    0.50   14.30
  26   0  -5   -8.70    9.90
 -26   0   5   -2.40    5.00
  24   0  -5   -4.20   10.10
 -24   0   5   -2.60    4.60
 -22   0   5   -8.10    4.00
  22   0  -5   -6.80    9.70
 -22   0   5   -1.60   12.00
  20   0  -5   -3.50    8.80
 -20   0   5   -2.70    3.80
 -20   0   5   -9.20   10.30
 -18   0   5    2.50    6.00
 -18   0   5    0.40    3.60
 -18   0   5    9.00    9.90
  18   0  -5    3.20    8.60
 -16   0   5    1.80    3.50
  16   0  -5    2.30    3.30
 -16   0   5    4.10    5.80
  16   0  -5    0.60    6.70
  14   0  -5    0.90    3.20
 -14   0   5    0.10    4.70
 -14   0   5   -6.70    2.90
  14   0  -5   -6.20    5.30
  12   0  -5    4.50    4.90
 -12   0   5   -2.20    3.90
  12   0  -5   -0.60    2.70
 -12   0   5   -6.30    2.70
 -10   0   5    6.30    4.00
  10   0  -5    3.10    2.60
  10   0  -5    4.40    2.50
 -10   0   5    1.40    2.70
 -10   0   5    3.30    2.80
  10   0  -5    2.00    4.70
   8   0  -5    1.50    4.00
  -8   0   5    1.70    3.10
  -8   0   5    0.80    2.20
  -8   0   5    0.50    1.80
   8   0  -5   -1.20    1.70
   8   0  -5    0.50    2.00
  -6   0   5    4.30    2.20
  -6   0   5    2.00    3.30
   6   0  -5   -1.40    1.50
   6   0  -5    1.20    3.80
   6   0  -5    0.70    1.90
  -6   0   5    0.40    1.80
  -4   0   5   -3.40    2.30
  -4   0   5   -6.70    3.50
   2   0  -5    2.20    2.30
  -2   0   5    5.40    2.90
   0   0   5    7.90    2.60
   2   0   5    0.40    2.30
   2   0   5    0.50    2.20
   2   0   5   -1.40    1.50
   4   0   5    0.30    1.70
   4   0   5    2.70    2.30
   4   0   5   -1.50    2.50
  -6   0  -5   -2.80    2.50
   6   0   5    0.70    3.70
   6   0   5   -0.40    1.60
   6   0   5    1.60    3.00
   8   0   5    1.60    3.50
  -8   0  -5    0.10    2.90
   8   0   5    5.10    4.70
  10   0   5    1.80    4.10
  10   0   5   -2.60    5.00
 -12   0  -5    0.00    3.50
  12   0   5    2.90    4.70
  12   0   5   -4.40    5.70
  14   0   5    0.10    5.00
 -14   0  -5   -2.60    4.10
  14   0   5   -5.50    6.60
  16   0   5   -4.30    7.90
 -16   0  -5   -6.20    4.50
  18   0   5  -11.50    9.00
 -18   0  -5   -6.00    4.70
  20   0   5  -13.40   11.50
  22   0   5   -5.80   12.00
  27  -1  -5   15.30   13.50
 -27  -1   5    4.40    5.50
  27   1  -5    1.90   13.10
 -27   1   5   -2.00    5.10
  25  -1  -5  157.88   23.90
 -25  -1   5  101.79   16.70
 -25   1   5   97.79   13.10
  25   1  -5   79.39   18.90
  23  -1  -5   95.29   17.70
 -23  -1   5  122.09   13.20
 -23  -1   5   68.29   19.20
 -23   1   5  117.69   13.10
  23   1  -5  105.29   21.60
 -21  -1   5   14.80    5.10
 -21  -1   5    0.90   11.40
  21  -1  -5   -0.20    9.10
 -21   1   5   13.40   13.20
 -21   1   5   14.40    5.00
  21   1  -5    7.10   10.40
  19  -1  -5   35.70   11.00
 -19  -1   5   25.00    5.60
 -19   1   5   11.80   11.50
 -19   1   5   26.80    5.80
  19   1  -5   22.70   11.90
 -19   1   5   35.90    8.90
 -17  -1   5  248.28   20.30
  17  -1  -5  240.88   24.80
 -17  -1   5  235.48   24.10
  17  -1  -5  197.88   20.40
 -17   1   5  185.98   28.40
  17   1  -5  205.88   20.30
 -17   1   5  235.58   20.40
  17   1  -5  211.98   20.30
  17   1  -5  199.48   27.00
  15  -1  -5 2230.68  189.98
  15  -1  -5 2697.33  191.48
 -15  -1   5 2744.83  188.88
 -15   1   5 2118.59  193.78
  15   1  -5 2256.47  188.78
 -15   1   5 2542.45  188.88
  15   1  -5 2310.67  191.98
  15   1  -5 2458.05  188.78
  13  -1  -5 1852.71  140.59
  13  -1  -5 1684.43  138.69
 -13  -1   5 1845.72  138.79
 -13  -1   5 2047.00  141.49
  13   1  -5 1657.83  141.49
 -13   1   5 1650.13  138.79
 -13   1   5 2006.30  139.99
 -13   1   5 1796.82  138.99
  13   1  -5 1699.63  138.49
  13   1  -5 1520.75  138.69
  11  -1  -5 3144.09  251.57
 -11  -1   5 3383.56  250.67
  11  -1  -5 3164.08  250.37
  11   1  -5 3269.37  253.27
 -11   1   5 3330.57  250.57
  11   1  -5 3220.48  250.17
 -11   1   5 2992.30  250.67
  11   1  -5 2910.11  250.57
 -11   1   5 3668.23  251.27
  -9  -1   5  492.25   36.30
   9  -1  -5  429.66   33.70
   9  -1  -5  400.46   34.60
  -9  -1   5  422.56   34.10
   9   1  -5  406.86   33.30
  -9   1   5  402.36   33.70
  -9   1   5  459.95   34.20
  -9   1   5  370.76   34.00
   9   1  -5  359.96   33.90
   9   1  -5  416.86   36.60
   7  -1  -5  464.05   37.00
  -7  -1   5  461.45   35.50
   7  -1  -5  453.75   34.90
  -7   1   5  451.45   34.90
   7   1  -5  446.26   34.50
   7   1  -5  401.56   37.10
   7   1  -5  401.16   35.30
  -7   1   5  393.26   35.40
  -5  -1   5 1281.07  100.89
   5  -1  -5 1150.98  100.29
  -5  -1   5 1367.66   99.89
  -5  -1   5 1129.19  101.69
   5  -1  -5 1347.67  100.39
   5   1  -5 1182.38  100.79
   5   1  -5 1360.76   99.89
  -5   1   5 1417.46  100.29
  -5   1   5 1351.56  100.39
   3  -1  -5 3415.36  252.47
  -3  -1   5 3117.19  252.77
  -3  -1   5 3253.97  251.77
  -3   1   5 3445.16  252.47
   3   1  -5 3409.56  251.77
   3   1  -5 2960.60  253.37
  -1  -1   5 1895.41  153.78
  -1  -1   5 2097.99  152.98
   1  -1  -5 2187.68  153.68
  -1  -1   5 1719.93  155.38
   1   1  -5 1804.72  153.78
  -1   1   5 2160.38  153.48
  -1   1   5 2004.00  153.58
   1  -1   5 1279.17  104.09
   1  -1   5 1321.07  102.39
   1   1   5 1392.56  102.59
   1   1   5 1385.46  102.79
  -1   1  -5 1202.38  102.29
   3  -1   5  141.39   12.20
   3  -1   5  166.78   14.60
   3   1   5  144.89   13.60
  -3   1  -5  128.19   14.30
   3   1   5  138.49   13.50
   5  -1   5  180.38   18.40
  -5  -1  -5  199.98   18.40
   5  -1   5  188.68   15.90
   5  -1   5  230.98   19.10
   5   1   5  186.98   18.30
   5   1   5  202.88   17.20
  -5   1  -5  174.58   18.40
   7  -1   5  849.41   65.19
  -7  -1  -5  832.62   65.09
   7  -1   5  746.63   64.69
   7   1   5  856.61   63.69
   7   1   5  778.32   64.89
  -7   1  -5  717.33   64.49
   9  -1   5  442.66   40.20
   9  -1   5  496.45   40.60
  -9  -1  -5  519.55   40.80
   9   1   5  446.66   38.40
   9   1   5  478.05   36.80
  -9   1  -5  444.66   39.70
   9   1   5  448.86   40.40
  11  -1   5 1334.17  117.49
  11  -1   5 1411.06  117.89
 -11  -1  -5 1691.53  118.89
 -11   1  -5 1461.45  117.19
  11   1   5 1483.05  118.49
  13  -1   5  534.45   49.70
  13  -1   5  568.34   50.09
  13   1   5  622.24   51.09
 -13   1  -5  574.34   48.70
  15  -1   5   62.59   13.60
  15  -1   5   81.99   15.60
 -15   1  -5   74.19   12.80
  15   1   5   79.09   15.00
  17  -1   5   36.60   10.50
  17   1   5   26.40   11.80
 -17   1  -5   38.90    8.90
  19  -1   5    1.30    8.80
  19   1   5   -8.60    9.50
 -19   1  -5   -5.10    6.30
  21  -1   5   21.10   12.80
  21   1   5   17.90   12.70
  23  -1   5   20.70   15.00
  23   1   5   14.00   13.60
 -23   1  -5    4.10    8.30
 -28  -2   5   -8.40    5.70
  28  -2  -5    3.00   13.10
 -28   2   5   -2.30    5.00
  28   2  -5   11.10   15.00
  26  -2  -5   89.09   20.10
 -26  -2   5  115.69   12.90
 -26  -2   5   53.19   21.30
 -26   2   5   79.99   12.00
  26   2  -5   48.50   20.60
  24  -2  -5   77.59   16.70
 -24  -2   5   56.69   18.00
  24   2  -5   75.39   20.00
  22  -2  -5   45.70   13.70
 -22  -2   5   26.00   13.10
 -22  -2   5   44.20   12.70
  22   2  -5   35.30    7.20
  22   2  -5   40.50   15.00
 -22   2   5   42.00    7.10
  20  -2  -5   23.80    9.70
 -20  -2   5   26.70    5.80
 -20   2   5   16.30   13.40
  20   2  -5   17.50   12.80
 -20   2   5   27.10    6.10
 -18  -2   5  347.87   26.20
  18   2  -5  271.87   28.00
  18   2  -5  273.87   32.40
 -18   2   5  292.77   26.00
 -18   2   5  326.17   28.00
  18   2  -5  250.97   25.70
 -18   2   5  265.17   35.20
 -16  -2   5 1943.91  141.99
  16  -2  -5 1749.72  142.39
  16  -2  -5 1943.71  144.49
 -16   2   5 1749.92  142.09
  16   2  -5 1656.93  141.89
  16   2  -5 1601.84  142.09
 -16   2   5 2047.60  143.59
  14  -2  -5 3342.27  259.37
 -14  -2   5 3501.45  258.17
  14  -2  -5 3589.84  259.87
  14   2  -5 3244.18  257.97
 -14   2   5 3589.74  258.97
  14   2  -5 3019.20  258.17
  14   2  -5 3182.88  261.87
 -14   2   5 2984.10  258.17
 -14   2   5 3475.85  258.67
 -12  -2   5 6573.04  479.15
  12  -2  -5 6716.13  480.05
  12  -2  -5 5899.91  478.95
  12   2  -5 5590.64  479.05
  12   2  -5 6017.30  482.45
 -12   2   5 5646.13  479.15
 -12   2   5 6774.52  479.35
 -12   2   5 6386.86  479.25
  12   2  -5 6199.38  478.65
 -10  -2   5 1226.78   92.59
  10  -2  -5 1235.68   90.29
 -10  -2   5 1168.98   89.89
  10  -2  -5 1092.59   89.59
  10   2  -5 1057.29   89.89
  10   2  -5 1130.99   89.19
 -10   2   5 1138.79   89.79
  10   2  -5 1069.19   92.99
   8  -2  -5 2544.95  185.48
  -8  -2   5 2523.45  185.78
  -8  -2   5 2366.36  187.78
   8  -2  -5 2352.96  185.48
   8   2  -5 2176.98  188.08
  -8   2   5 2581.64  184.98
  -8   2   5 2352.96  185.48
   8   2  -5 2320.47  184.78
   8   2  -5 2269.97  185.78
  -6  -2   5  525.55   38.30
   6  -2  -5  507.35   37.90
  -6  -2   5  415.76   39.80
   6   2  -5  445.96   38.10
   6   2  -5  400.96   40.10
   6   2  -5  493.75   37.00
  -6   2   5  488.85   37.90
  -4  -2   5  161.68   17.80
  -4  -2   5  184.28   15.70
   4  -2  -5  198.88   15.50
   4   2  -5  163.88   15.60
  -4   2   5  190.28   15.50
  -2  -2   5  823.02   71.09
  -2  -2   5  903.11   69.09
   2  -2  -5  933.71   69.09
   2   2  -5  837.72   69.09
  -2   2   5  895.81   69.09
   0  -2   5 2555.74  210.08
   0  -2  -5 2898.51  208.08
   0  -2   5 2630.84  207.98
   0   2   5 2802.32  208.18
   0   2  -5 2598.44  208.18
   0   2   5 2647.94  208.28
   2  -2   5  221.08   18.30
  -2  -2  -5  243.28   19.70
   2  -2   5  227.18   20.80
  -2   2  -5  201.28   20.70
   2   2   5  234.78   19.50
  -2   2  -5  221.28   18.50
   2   2   5  214.28   18.90
  -4  -2  -5  388.86   30.00
   4  -2   5  365.66   27.90
   4  -2   5  390.86   31.30
   4   2   5  355.16   30.00
  -4   2  -5  289.67   28.00
  -4   2  -5  329.27   30.90
   6  -2   5  844.82   64.59
   6  -2   5  751.52   60.59
  -6  -2  -5  802.72   63.39
   6   2   5  770.52   63.49
  -6   2  -5  739.43   64.09
   8  -2   5 2155.18  162.58
  -8  -2  -5 2205.48  161.88
   8  -2   5 1876.41  161.18
   8   2   5 1991.70  158.88
   8   2   5 2022.50  161.78
  -8   2  -5 2057.09  162.08
  10  -2   5 1900.21  155.38
  10  -2   5 1873.41  154.48
 -10  -2  -5 2086.49  155.08
 -10   2  -5 1983.20  154.88
  10   2   5 1987.10  151.18
  10   2   5 1875.01  155.08
  12  -2   5 1503.55  131.59
  12  -2   5 1601.24  128.89
  12  -2   5 1656.93  131.19
  12   2   5 1726.03  132.09
  12   2   5 1605.24  126.79
 -12   2  -5 1737.03  131.39
  14  -2   5  432.76   39.40
  14  -2   5  376.86   40.00
 -14   2  -5  449.06   38.90
  14   2   5  425.66   40.40
  16  -2   5  322.87   33.00
 -16   2  -5  325.07   31.90
  16   2   5  313.07   34.30
  18  -2   5    5.50    8.40
  18  -2   5    1.10    8.00
  18   2   5    2.40    9.90
 -18   2  -5   -4.80    6.50
  20  -2   5   18.20    9.20
 -20   2  -5    5.10    8.00
  20   2   5   19.00   14.20
  22  -2   5   26.90   11.20
 -22   2  -5   22.10   10.80
  22   2   5   44.20   16.40
  27  -3  -5  -11.90   20.50
 -27  -3   5    1.40    6.00
  27   3  -5   -9.10   14.00
 -27   3   5    1.80    5.40
  25  -3  -5    1.90   11.40
 -25  -3   5   -3.00    5.40
  25   3  -5   15.10   23.10
 -25   3   5  -11.60    4.70
 -23  -3   5   25.60    6.70
  23  -3  -5   22.80   13.30
 -23  -3   5   12.50   12.90
 -23   3   5   23.40    6.10
  23   3  -5    7.90   13.00
  23   3  -5   11.80    6.20
 -21  -3   5   89.69   11.70
  21  -3  -5   68.69   15.60
 -21   3   5   82.99   11.60
  21   3  -5   80.69   19.40
  19  -3  -5  308.47   27.40
 -19  -3   5  260.87   22.90
 -19   3   5  244.08   22.70
  19   3  -5  195.48   22.40
  19   3  -5  226.48   30.20
  17  -3  -5  485.25   41.10
 -17  -3   5  522.05   38.50
  17   3  -5  469.95   38.60
  17   3  -5  392.26   38.40
 -17   3   5  437.46   38.50
 -17   3   5  504.35   39.60
  17   3  -5  382.16   43.90
 -17   3   5  442.06   47.00
  15  -3  -5 1043.60   78.49
 -15  -3   5  999.80   76.69
 -15   3   5 1013.80   77.49
 -15   3   5  889.41   76.89
 -15   3   5  961.50   84.09
  15   3  -5  867.11   76.69
  13  -3  -5 1733.63  126.39
  13  -3  -5 1538.75  125.59
 -13  -3   5 1797.12  129.49
 -13  -3   5 1709.83  125.39
 -13   3   5 1579.94  125.59
 -13   3   5 1417.76  130.59
  13   3  -5 1565.54  129.89
  13   3  -5 1444.06  125.29
 -11  -3   5 2423.76  171.88
  11  -3  -5 2129.99  171.68
  11  -3  -5 2335.47  172.08
 -11  -3   5 2399.36  175.38
  11   3  -5 2060.99  171.78
  11   3  -5 2130.49  175.88
 -11   3   5 2279.57  171.98
 -11   3   5 1867.31  176.08
   9  -3  -5  816.82   59.09
   9  -3  -5  758.82   59.29
  -9  -3   5  731.83   62.49
  -9  -3   5  815.82   59.49
  -9   3   5  786.42   59.59
   9   3  -5  676.83   59.29
  -9   3   5  610.54   63.49
   9   3  -5  726.03   63.59
   7  -3  -5 1408.16   97.29
  -7  -3   5 1386.06   98.29
  -7  -3   5 1121.79  100.29
   7  -3  -5 1256.87   97.99
  -7  -3   5 1205.78  100.79
   7   3  -5 1183.18   98.09
  -7   3   5 1289.27   98.19
   7   3  -5 1117.69  100.99
  -5  -3   5   16.40    6.20
  -5  -3   5   11.10    2.90
   5  -3  -5   13.20    3.10
  -5  -3   5   12.20    4.90
  -5   3   5   10.80    3.40
   5   3  -5   16.10    3.60
  -3  -3   5  213.48   17.90
  -3  -3   5  198.18   20.20
   3  -3  -5  208.78   17.80
  -3   3   5  215.88   18.10
   3   3  -5  207.78   17.90
   1  -3  -5   62.49    6.30
  -1  -3   5   63.29    9.20
  -1  -3   5   58.49    6.60
   1  -3  -5   69.99    6.90
  -1   3   5   70.39    7.10
   1   3  -5   62.29    6.60
  -1   3   5   52.69    7.10
   1   3  -5   42.40    8.60
   1  -3   5   75.69   10.10
   1  -3   5   67.69    7.10
  -1  -3  -5   80.09    7.90
   1  -3   5   68.29    6.30
   1   3   5   67.99    8.50
  -1   3  -5   67.29    7.20
   1   3   5   67.99    7.80
  -1   3  -5   71.39   10.10
   3  -3   5  337.47   27.30
  -3  -3  -5  390.26   29.20
   3  -3   5  335.67   27.30
   3  -3   5  348.47   30.80
  -3   3  -5  327.57   27.60
   3   3   5  340.97   29.40
  -3   3  -5  313.97   30.70
   3   3   5  324.27   28.30
  -5  -3  -5  986.20   74.29
   5  -3   5  890.71   71.79
   5  -3   5  889.41   72.29
   5  -3   5 1016.80   76.09
   5   3   5  930.21   74.39
  -5   3  -5  862.51   71.99
  -5   3  -5  890.11   75.69
   7  -3   5  725.03   58.19
   7  -3   5  787.62   62.29
   7  -3   5  656.83   57.19
  -7  -3  -5  807.12   60.59
  -7   3  -5  729.43   61.59
   7   3   5  715.43   57.99
  -7   3  -5  687.73   57.19
   7   3   5  782.92   60.99
   9  -3   5 1158.48   96.49
  -9  -3  -5 1201.48   95.29
   9  -3   5 1214.08  100.89
   9  -3   5 1111.79   92.59
  -9   3  -5 1199.38   95.99
   9   3   5 1196.98   95.49
   9   3   5 1157.18   91.99
 -11  -3  -5 1108.19   85.19
  11  -3   5 1024.30   86.49
  11  -3   5  993.00   84.29
  11  -3   5  936.71   82.29
  11   3   5 1057.19   85.49
 -11   3  -5 1033.50   85.39
  11   3   5 1067.69   80.89
  13  -3   5  217.08   28.60
  13  -3   5  281.77   24.50
  13  -3   5  278.07   26.60
  13   3   5  245.28   21.40
 -13   3  -5  263.27   27.20
  13   3   5  253.27   28.00
  15  -3   5  162.28   25.40
  15  -3   5  197.48   22.60
  15   3   5  184.48   16.10
  15   3   5  190.68   25.50
  17  -3   5   21.80   11.50
  17  -3   5   26.70   11.80
  17   3   5   37.90   13.80
 -17   3  -5   18.40    9.00
  19  -3   5   20.40   16.00
  19  -3   5   -0.70    9.00
  19   3   5    6.70   11.40
 -19   3  -5    2.60    8.20
  21  -3   5  -11.30    8.70
  21   3   5   -3.70   11.20
 -26  -4   5  400.56   33.90
  26  -4  -5  354.66   40.50
 -26   4   5  397.66   33.30
  26   4  -5  292.87   43.60
 -24  -4   5  458.65   35.20
  24  -4  -5  411.26   40.80
 -24  -4   5  332.97   46.60
 -24   4   5  381.66   34.30
  24   4  -5  337.57   44.40
 -22  -4   5  508.45   40.10
  22  -4  -5  486.55   44.80
 -22   4   5  467.85   39.80
  22   4  -5  362.46   47.40
 -20   4   5  150.68   14.90
  20   4  -5  115.29   14.50
  20   4  -5   79.99   18.70
 -18  -4   5  213.78   18.20
 -18   4   5  183.88   19.10
  18   4  -5  158.88   26.70
  18   4  -5  142.69   17.40
 -18   4   5  163.58   17.70
  16  -4  -5   29.60    8.20
 -16  -4   5   38.20    6.50
  16   4  -5   28.30   14.00
 -16   4   5   36.10    7.60
 -16   4   5   13.70    9.70
  16   4  -5   26.30    6.30
  14  -4  -5    5.00    3.60
 -14  -4   5    1.20    7.20
 -14  -4   5    5.80    3.90
  14  -4  -5    4.70    5.00
 -14  -4   5    1.50    4.50
 -14   4   5    1.10    7.70
  14   4  -5    5.00   10.60
 -14   4   5    4.50    4.50
  14   4  -5    0.80    3.30
 -12  -4   5    3.10    4.50
  12  -4  -5    6.30    4.10
 -12  -4   5    5.40    3.50
 -12  -4   5   -3.00    5.50
  12   4  -5    3.00    3.20
 -12   4   5    7.10    7.90
  12   4  -5   -2.60    6.30
 -12   4   5    5.80    3.90
 -10  -4   5    7.90    3.70
 -10  -4   5    6.80    5.00
  10  -4  -5    6.60    3.60
  10  -4  -5    4.50    3.60
 -10  -4   5    1.20    5.80
 -10   4   5    7.00    6.90
  10   4  -5    5.00    3.20
  10   4  -5   11.50    8.20
 -10   4   5    5.50    4.30
  -8  -4   5 2027.60  167.58
   8  -4  -5 2110.19  164.98
   8  -4  -5 2391.86  164.38
  -8  -4   5 1921.71  168.18
  -8  -4   5 2339.17  165.18
   8   4  -5 2089.59  165.18
   8   4  -5 2020.10  169.28
  -8   4   5 1872.11  169.08
  -8   4   5 2248.58  165.38
  -6  -4   5 2905.51  226.58
  -6  -4   5 2673.13  226.98
  -6  -4   5 3150.98  224.08
   6  -4  -5 2925.81  223.88
  -6   4   5 3032.00  224.18
   6   4  -5 2973.30  224.08
  -6   4   5 2524.25  227.38
  -4  -4   5 1991.00  146.99
  -4  -4   5 2099.79  144.29
  -4  -4   5 1654.03  146.89
   4  -4  -5 1916.31  144.19
  -4   4   5 1999.70  144.49
   4   4  -5 1563.84  146.19
  -4   4   5 1635.94  146.99
   4   4  -5 1921.21  144.29
   2  -4  -5 2269.67  167.58
  -2  -4   5 2291.07  167.28
  -2  -4   5 2293.07  170.18
  -2   4   5 1864.31  169.58
   2   4  -5 2208.08  167.38
  -2   4   5 2323.77  167.88
  -2   4   5 2021.90  167.88
   2   4  -5 1953.80  169.98
   0  -4   5 1693.93  126.29
   0  -4   5 1712.23  123.19
   0  -4  -5 1695.53  123.89
   0  -4   5 1543.35  122.09
   0   4   5 1588.84  123.69
   0   4  -5 1530.95  126.49
   0   4  -5 1594.14  123.29
   0   4   5 1512.85  124.09
   0   4   5 1359.46  125.09
   2  -4   5 2014.60  152.68
   2  -4   5 1895.51  149.19
  -2  -4  -5 2229.68  150.68
   2  -4   5 1882.51  148.69
   2   4   5 1907.21  149.99
   2   4   5 1849.42  150.88
   2   4   5 1699.13  150.58
  -2   4  -5 1910.41  152.98
  -2   4  -5 1916.61  149.29
   4  -4   5  544.65   44.50
   4  -4   5  597.74   49.00
   4  -4   5  552.54   44.60
   4   4   5  556.74   45.70
   4   4   5  596.64   47.50
   4   4   5  539.75   45.50
  -4   4  -5  559.84   48.80
  -4   4  -5  548.95   44.60
   6  -4   5  461.85   40.00
   6  -4   5  527.65   45.40
   6  -4   5  496.05   40.50
  -6  -4  -5  540.05   43.10
   6   4   5  495.35   40.80
   6   4   5  500.05   43.60
  -6   4  -5  512.35   45.00
   8  -4   5   54.29    7.30
  -8  -4  -5   77.89   12.20
   8  -4   5   49.50   10.80
   8   4   5   50.39   10.30
  -8   4  -5   45.60    5.80
   8   4   5   49.20    7.20
  -8   4  -5   50.09   10.50
 -10  -4  -5   23.90    7.50
  10  -4   5   30.70    8.60
  10  -4   5   24.70    5.70
  10  -4   5   11.80    8.20
 -10   4  -5   21.50    8.10
  10   4   5   26.60    9.50
  10   4   5   18.50    4.60
  12  -4   5   96.19   14.80
  12  -4   5   98.59   11.90
  12  -4   5   85.09   16.20
  12   4   5   97.19   10.40
  12   4   5   86.29   15.20
 -12   4  -5   91.09   16.00
  14  -4   5   35.00   12.40
  14  -4   5   36.10   10.10
 -14   4  -5   32.20   10.50
  14   4   5   33.90    5.80
  14   4   5   42.10   14.00
  16  -4   5   24.00   11.70
  16  -4   5   35.70    9.60
  16   4   5   31.30    5.10
  16   4   5   29.20   12.30
 -16   4  -5   22.30   11.10
  18  -4   5   42.30   14.30
  18  -4   5   71.49   13.60
  18   4   5   85.49    9.30
  18   4   5   67.99   15.50
  20  -4   5  256.87   28.20
  20  -4   5  155.68   28.40
  20   4   5  210.28   30.00
  22  -4   5   78.79   17.90
  22   4   5   45.60   17.70
  27  -5  -5  439.26   45.80
 -27  -5   5  388.26   41.90
 -27  -5   5  496.65   38.40
  27   5  -5  314.67   46.90
  25  -5  -5  913.11   74.09
 -25  -5   5  766.42   70.49
 -25  -5   5  670.73   87.29
 -25  -5   5  924.01   68.39
 -25   5   5  987.60   73.09
  25   5  -5  643.24   75.99
 -23  -5   5 1008.50   71.89
 -23  -5   5  793.62   74.29
  23  -5  -5  953.90   76.19
  23   5  -5  713.73   79.39
 -21  -5   5  801.52   71.79
 -21  -5   5  957.50   69.29
  21  -5  -5  887.31   72.49
  21   5  -5  728.23   76.59
 -21   5   5  821.12   69.19
 -19  -5   5   59.19   11.50
 -19  -5   5   73.59   10.10
  19  -5  -5   85.59   13.50
  19   5  -5   58.09   17.20
 -19   5   5   54.49    9.90
 -19   5   5   57.29   10.70
  17  -5  -5   20.80    8.00
 -17  -5   5   19.20    5.80
 -17  -5   5   18.30    7.50
  17   5  -5   10.80    4.90
  17   5  -5   -1.30   11.20
 -17   5   5   17.40    6.50
 -15  -5   5  150.68   14.90
  15  -5  -5  131.19   15.80
 -15  -5   5  139.09   17.70
 -15   5   5  149.39   15.50
  15   5  -5  141.39   24.20
  15   5  -5  106.29   14.20
 -13  -5   5  842.12   61.99
  13  -5  -5  858.31   62.49
 -13  -5   5  741.63   64.49
  13  -5  -5  698.13   61.69
 -13  -5   5  803.82   66.89
  13   5  -5  736.43   61.89
  13   5  -5  677.33   67.49
 -13   5   5  734.93   68.49
 -13   5   5  767.62   62.29
 -11  -5   5  373.46   36.60
 -11  -5   5  381.16   40.80
  11  -5  -5  371.86   34.00
  11  -5  -5  426.66   34.00
 -11  -5   5  455.85   34.40
  11   5  -5  377.06   39.90
  11   5  -5  417.86   34.50
 -11   5   5  404.06   40.70
 -11   5   5  422.86   34.70
  -9  -5   5  951.50   77.99
  -9  -5   5 1023.10   75.39
   9  -5  -5 1007.30   74.69
  -9  -5   5  867.81   79.09
   9   5  -5  869.91   80.19
   9   5  -5  929.41   75.39
  -9   5   5  881.71   80.29
  -9   5   5  990.50   75.69
  -7  -5   5 1191.98   84.49
   7  -5  -5 1064.09   84.29
  -7  -5   5 1120.49   87.19
  -7  -5   5  955.90   87.99
  -7   5   5 1113.49   84.69
   7   5  -5 1075.59   84.39
  -7   5   5 1001.10   88.89
   7   5  -5  953.10   88.69
  -5  -5   5 2246.38  159.28
  -5  -5   5 1847.52  162.48
   5  -5  -5 1993.60  159.08
   5  -5  -5 1879.11  158.98
  -5  -5   5 2185.88  162.08
  -5   5   5 2320.67  159.88
   5   5  -5 1745.03  161.58
  -5   5   5 1957.30  162.98
   5   5  -5 2017.60  159.18
   5   5  -5 2198.48  157.88
   3  -5  -5 6643.34  519.55
  -3  -5   5 7193.58  522.55
   3  -5  -5 6772.22  519.75
  -3  -5   5 7187.18  519.55
   3   5  -5 5941.81  522.35
  -3   5   5 7195.88  520.15
   3   5  -5 6606.64  519.55
  -3   5   5 6296.67  522.55
   1  -5  -5 2280.37  175.28
  -1  -5   5 2275.77  173.58
   1  -5  -5 2522.35  175.78
  -1  -5   5 2399.86  178.18
  -1  -5   5 2250.67  174.78
   1   5  -5 2167.28  178.48
  -1   5   5 1890.21  175.38
  -1   5   5 2313.27  175.48
   1   5  -5 2248.38  174.98
  -1   5   5 2083.19  177.38
   1   5  -5 2302.17  174.28
   1  -5   5 6270.47  439.26
   1  -5   5 5798.22  435.36
   1  -5   5 5411.56  434.36
   1   5   5 5115.39  436.76
   1   5   5 5541.95  437.36
   1   5   5 5686.53  436.06
  -1   5  -5 5552.84  434.46
  -1   5  -5 5644.64  435.46
  -1   5  -5 5729.53  439.56
   3  -5   5 2298.37  181.68
   3  -5   5 2231.68  181.08
   3  -5   5 2524.35  186.08
   3   5   5 2318.17  183.18
  -3   5  -5 2428.36  186.38
   3   5   5 2251.37  184.08
  -3   5  -5 2336.37  181.78
   5  -5   5  442.46   38.50
   5  -5   5  477.95   43.60
   5  -5   5  456.75   38.30
  -5   5  -5  468.25   38.40
   5   5   5  486.85   39.60
   5   5   5  474.35   39.20
   5   5   5  465.05   42.00
  -5   5  -5  491.65   43.50
   5   5   5  521.45   39.00
   7  -5   5    9.90    3.90
  -7  -5  -5   16.50    6.90
   7  -5   5    9.60    3.40
   7  -5   5   21.70    7.80
  -7   5  -5   12.40    3.20
   7   5   5   13.00    7.70
   7   5   5   23.00    4.70
   9  -5   5   35.60   17.70
   9  -5   5   36.80    6.10
  -9  -5  -5   36.00    8.40
   9   5   5   22.70   11.10
  -9   5  -5   31.00    4.60
   9   5   5   42.00    6.10
  11  -5   5   56.09   10.90
  11  -5   5   46.30    7.50
  11  -5   5   40.40   12.20
  11   5   5   51.69   13.10
 -11   5  -5   50.99    6.00
 -11   5  -5   35.10    9.80
  11   5   5   57.69    8.00
  13  -5   5  488.55   50.29
  13  -5   5  528.65   46.10
  13   5   5  466.25   47.60
  13   5   5  538.55   41.90
  15  -5   5   19.70   11.50
  15  -5   5   35.90    9.60
  15   5   5   25.70    5.70
  15   5   5   23.20   11.50
  17  -5   5   25.70   12.70
  17  -5   5   30.50    9.90
  17   5   5   23.60    5.70
  17   5   5   31.90   14.00
  19  -5   5  401.16   37.80
  19  -5   5  278.77   40.80
  19   5   5  348.27   43.90
  19   5   5  377.06   30.30
  21  -5   5  380.96   47.10
  21   5   5  475.65   47.50
 -26  -6   5  432.66   37.30
 -26  -6   5  412.36   39.10
  26  -6  -5  383.26   43.10
  26   6  -5  294.07   46.20
 -26   6   5  432.16   35.90
  24  -6  -5  381.76   40.20
 -24  -6   5  411.56   38.60
 -24  -6   5  464.25   36.60
 -24   6   5  364.96   34.90
  24   6  -5  311.67   45.20
 -22  -6   5 1192.58   88.59
  22  -6  -5 1084.79   91.39
 -22  -6   5 1129.19   91.09
 -22   6   5 1079.29   88.09
  22   6  -5  908.91   96.09
  20  -6  -5  141.79   20.30
 -20  -6   5  171.48   18.20
 -20  -6   5  155.58   21.10
 -20   6   5  174.58   19.50
  20   6  -5  107.09   23.40
  18  -6  -5  103.99   15.80
 -18  -6   5  108.29   14.20
 -18  -6   5  108.09   16.90
 -18   6   5   98.39   14.40
  18   6  -5   81.09   21.60
 -16  -6   5   52.69    8.70
 -16  -6   5   55.49   10.60
  16  -6  -5   55.09   10.00
 -16   6   5   61.69   10.80
  16   6  -5   30.50   13.60
  14  -6  -5  109.29   12.70
 -14  -6   5   83.99   12.20
 -14  -6   5   98.89   15.20
  14   6  -5   89.89   20.30
 -14   6   5   86.39   12.30
  12  -6  -5  310.77   27.90
 -12  -6   5  333.87   31.00
 -12  -6   5  303.37   33.30
 -12  -6   5  333.17   28.30
  12  -6  -5  334.77   28.10
  12   6  -5  305.27   28.10
 -12   6   5  303.57   34.80
  12   6  -5  267.77   34.60
 -12   6   5  347.27   28.90
 -10  -6   5  384.36   31.50
  10  -6  -5  274.27   26.00
  10  -6  -5  323.27   26.00
 -10  -6   5  315.47   29.40
 -10  -6   5  259.17   30.70
  10   6  -5  296.87   26.50
 -10   6   5  271.27   27.90
  10   6  -5  286.37   35.50
   8  -6  -5  643.54   62.19
  -8  -6   5  818.82   62.69
  -8  -6   5  810.52   59.69
   8   6  -5  628.54   64.29
  -8   6   5  732.23   69.19
  -6  -6   5  691.63   69.79
  -6  -6   5  889.51   66.49
   6  -6  -5  785.22   66.09
  -6  -6   5  939.31   69.79
   6   6  -5  688.93   68.79
   6   6  -5  847.22   66.49
   6   6  -5  851.61   64.99
  -6   6   5  845.42   71.19
  -6   6   5  891.31   66.99
  -4  -6   5 3263.27  231.88
  -4  -6   5 3133.89  228.48
   4  -6  -5 2821.92  228.38
   4  -6  -5 2669.63  228.78
  -4   6   5 3130.59  229.08
   4   6  -5 3021.50  227.08
  -4   6   5 2912.91  232.28
   4   6  -5 2574.34  231.48
   4   6  -5 2921.81  228.58
  -2  -6   5 2796.22  214.88
  -2  -6   5 3019.10  218.58
   2  -6  -5 2673.43  215.08
   2   6  -5 2749.32  213.58
   2   6  -5 2744.53  214.98
  -2   6   5 2852.81  215.48
  -2   6   5 2729.33  218.08
   2   6  -5 2548.34  218.58
   0  -6   5 1365.86  104.79
   0  -6   5 1262.17  100.69
   0  -6   5 1197.88   99.49
   0  -6  -5 1415.26  102.49
   0  -6  -5 1259.07  101.19
   0   6   5 1309.87  103.49
   0   6  -5 1260.67   99.69
   0   6   5 1250.87  101.29
   0   6  -5 1266.17  105.19
   0   6  -5 1231.28  100.79
  -2  -6  -5 1847.52  127.19
   2  -6   5 1479.95  123.69
   2  -6   5 1539.05  124.69
   2  -6   5 1688.83  129.29
   2   6   5 1563.34  125.39
  -2   6  -5 1549.45  123.89
  -2   6  -5 1620.44  132.29
   2   6   5 1466.05  125.09
   2   6   5 1731.63  126.89
   2   6   5 1418.86  126.89
  -2   6  -5 1642.24  124.89
   4  -6   5  855.71   74.29
   4  -6   5  892.81   73.69
  -4  -6  -5 1087.69   77.39
   4  -6   5  961.50   79.59
   4   6   5  877.11   76.99
  -4   6  -5  990.80   79.89
   4   6   5  896.71   74.99
  -4   6  -5  939.41   73.99
   4   6   5  848.92   77.29
  -4   6  -5  970.00   74.49
   4   6   5 1006.80   75.79
   6  -6   5   93.69   17.00
  -6  -6  -5   84.89   13.40
   6  -6   5   68.29    9.60
   6  -6   5   79.69    9.10
  -6   6  -5   88.09   14.80
   6   6   5   84.59   10.50
   6   6   5   59.19   12.90
  -6   6  -5   70.09    9.20
   6   6   5   90.39    9.60
   6   6   5   92.49   10.60
   8  -6   5   -1.30    7.50
  -8  -6  -5   -2.50    6.20
   8  -6   5    8.20    4.10
   8   6   5    9.70    5.70
  -8   6  -5    6.00    3.60
   8   6   5    3.50    4.40
  -8   6  -5    8.80    6.80
   8   6   5   -0.50    8.20
  10  -6   5    1.40    8.70
  10  -6   5    3.30    4.60
 -10  -6  -5   10.30    8.80
  10   6   5   12.80    9.80
  10   6   5   12.20    4.90
 -10   6  -5    5.40    3.50
  12  -6   5  377.36   43.00
  12  -6   5  425.86   37.80
  12  -6   5  369.36   34.40
  12   6   5  413.76   38.90
 -12   6  -5  402.26   32.30
  12   6   5  396.56   40.20
  14  -6   5   -0.10    7.00
  14  -6   5   -6.40    9.30
  14   6   5   -0.60    5.10
  14   6   5   -6.70   11.00
  16  -6   5  129.59   18.80
  16  -6   5   77.29   19.40
  16   6   5   96.59   19.10
  16   6   5  120.29   14.10
  18  -6   5  182.48   23.00
  18  -6   5  101.69   22.50
  18   6   5  173.28   35.80
  18   6   5  148.89   17.10
  20  -6   5  312.17   35.10
  20   6   5  312.97   38.80
  25  -7  -5   29.90   14.20
 -25  -7   5   34.90    9.30
 -25  -7   5   22.30    9.40
  25   7  -5   25.00   14.60
 -25   7   5   22.60    7.40
 -23  -7   5   70.29   12.20
 -23  -7   5   75.89   13.50
  23  -7  -5   78.79   15.20
  23   7  -5   50.99   21.40
 -23   7   5   71.89   11.30
 -21  -7   5  161.38   23.20
 -21  -7   5  186.68   20.60
  21  -7  -5  204.18   23.40
  21   7  -5  115.49   26.20
 -21   7   5  210.38   21.60
 -19  -7   5  174.78   19.80
 -19  -7   5  162.28   22.20
  19  -7  -5  163.98   20.70
  19   7  -5  140.09   29.10
 -19   7   5  216.38   21.20
  17  -7  -5  262.87   26.40
 -17  -7   5  282.67   28.20
 -17  -7   5  267.77   25.40
  17   7  -5  189.68   33.10
 -17   7   5  254.17   25.70
  15  -7  -5   85.19   12.70
 -15  -7   5   93.29   13.30
 -15  -7   5   82.69   15.00
 -15   7   5   96.29   13.50
  15   7  -5   62.19   19.70
 -13  -7   5  276.47   26.80
  13  -7  -5  229.88   23.20
 -13  -7   5  259.97   23.90
  13   7  -5  228.38   31.90
 -13   7   5  247.68   24.10
 -11  -7   5   48.80   10.20
 -11  -7   5   52.49    7.70
  11   7  -5   37.00   14.30
 -11   7   5   37.50    8.70
  -9  -7   5  647.14   50.89
  -9  -7   5  635.24   47.80
   9  -7  -5  573.84   47.20
  -9  -7   5  484.55   51.79
  -9   7   5  570.14   53.39
   9   7  -5  466.95   53.29
   9   7  -5  553.14   47.50
   9   7  -5  582.14   46.10
  -9   7   5  574.94   47.90
  -7  -7   5  135.49   17.20
   7  -7  -5  118.69   12.80
  -7  -7   5  136.99   14.00
  -7  -7   5  131.09   19.10
  -7   7   5  117.39   19.20
   7   7  -5  134.69   11.90
   7   7  -5  116.19   13.40
   7   7  -5   96.69   15.70
  -5  -7   5  422.06   34.30
   5  -7  -5  360.76   32.20
   5  -7  -5  324.77   33.20
  -5  -7   5  437.16   36.70
   5   7  -5  382.16   31.10
  -5   7   5  427.56   35.10
  -5   7   5  393.46   37.50
   5   7  -5  328.87   36.60
   5   7  -5  391.06   32.90
   3  -7  -5  335.17   31.90
  -3  -7   5  372.56   30.80
  -3  -7   5  317.27   34.60
   3  -7  -5  337.07   30.50
  -3  -7   5  397.16   34.80
  -3   7   5  382.36   34.90
  -3   7   5  393.56   31.60
   3   7  -5  312.87   34.50
   3   7  -5  357.96   29.20
  -1  -7   5   98.19   12.40
   1  -7  -5  112.49   14.80
   1  -7  -5  109.69   12.10
  -1  -7   5  125.59   17.60
  -1  -7   5  112.39   10.50
   1   7  -5  118.69   10.80
  -1   7   5  134.09   16.20
   1   7  -5  108.09   12.30
  -1   7   5  114.99   13.20
   1   7  -5  110.79   16.70
   1  -7   5  480.75   45.40
   1  -7   5  434.56   36.50
  -1  -7  -5  469.85   40.40
   1  -7   5  445.56   38.00
   1   7   5  408.56   40.20
   1   7   5  531.85   41.00
   1   7   5  451.45   38.40
  -1   7  -5  481.25   38.10
  -1   7  -5  476.15   36.90
   1   7   5  362.96   40.00
  -3  -7  -5    2.50    6.40
   3  -7   5    0.50    6.50
   3  -7   5    5.30    3.10
   3  -7   5    6.40    4.40
  -3   7  -5    7.30    3.70
  -3   7  -5    4.40    3.70
   3   7   5   12.20    4.90
   3   7   5    8.20    4.30
   3   7   5    1.00    7.20
  -3   7  -5    7.20    5.60
   3   7   5    9.70    4.90
   5  -7   5  308.47   26.90
   5  -7   5  259.07   27.60
  -5  -7  -5  381.26   32.00
   5  -7   5  324.37   34.70
   5   7   5  361.06   28.80
  -5   7  -5  330.07   27.40
   5   7   5  303.27   28.60
   5   7   5  342.47   28.80
   5   7   5  286.47   32.10
  -5   7  -5  336.77   34.60
  -5   7  -5  318.57   27.70
   7  -7   5  136.79   23.00
  -7  -7  -5  155.78   19.10
   7  -7   5  124.39   13.80
  -7   7  -5  139.39   14.50
   7   7   5  155.38   14.20
   7   7   5  124.49   15.30
   7   7   5  144.59   15.60
   9  -7   5   10.20   10.20
  -9  -7  -5   29.50   10.60
  -9   7  -5   18.70    5.10
   9   7   5   21.50    5.90
   9   7   5    0.50   10.30
   9   7   5   17.80    6.40
  11  -7   5  360.46   31.50
  11  -7   5  331.17   41.50
  11   7   5  375.56   31.70
 -11   7  -5  394.06   30.60
  11   7   5  361.26   33.10
  11   7   5  311.17   37.30
  13  -7   5   -1.40   10.70
  13  -7   5   21.40    9.50
 -13   7  -5   15.80    4.30
  13   7   5    6.40    5.20
  13   7   5    3.80   10.40
  15  -7   5  179.98   32.40
  15  -7   5  229.88   25.00
  15   7   5  184.78   28.40
  15   7   5  177.58   19.80
  17  -7   5   23.40   15.10
  17  -7   5   61.39   14.10
  17   7   5   64.39   16.50
  19  -7   5   52.99   14.40
  19  -7   5   21.10   14.70
  19   7   5   40.40   15.80
 -24  -8   5   67.69   12.30
  24  -8  -5   68.29   15.90
 -24  -8   5   60.89   12.20
 -24   8   5   56.99   10.60
  24   8  -5   89.99   23.10
  22  -8  -5   -4.00    7.70
 -22  -8   5   11.30    7.90
 -22  -8   5   -0.20    7.20
 -22   8   5   -0.90    7.70
  22   8  -5   -2.40   13.30
 -20  -8   5   18.50    9.10
  20  -8  -5   25.20    9.10
 -20  -8   5   15.40    7.60
  20   8  -5   14.70   26.70
 -20   8   5   22.70    8.90
  18  -8  -5  252.17   26.30
 -18  -8   5  234.08   25.30
 -18  -8   5  280.67   28.70
 -18   8   5  247.98   25.80
  18   8  -5  218.38   35.00
  16  -8  -5  781.02   64.49
 -16  -8   5  768.82   62.59
 -16  -8   5  829.52   65.39
  16   8  -5  590.54   69.59
 -16   8   5  724.63   63.09
  14  -8  -5  879.11   71.29
 -14  -8   5  953.30   74.39
 -14  -8   5  895.71   71.59
 -14   8   5  840.32   71.89
  14   8  -5  738.43   78.69
 -12  -8   5 1250.67  100.69
 -12  -8   5 1370.56  104.29
  12   8  -5 1140.99  108.09
  12   8  -5 1253.67   99.49
 -12   8   5 1233.28  101.19
 -10  -8   5  597.04   50.29
 -10  -8   5  530.45   44.20
  10   8  -5  420.86   50.89
 -10   8   5  519.25   44.50
  10   8  -5  502.25   42.40
  -8  -8   5  442.36   34.90
  -8   8   5  430.06   35.10
   8   8  -5  403.76   32.90
   8   8  -5  315.47   36.90
  -6  -8   5   16.90    5.60
  -6  -8   5   24.20    8.80
   6  -8  -5   15.10    6.90
  -6  -8   5   20.60   12.10
   6  -8  -5   17.70   10.90
   6  -8  -5   14.60    5.50
  -6   8   5   16.50    5.80
  -6   8   5   17.90    8.90
   6   8  -5   18.30    4.60
   6   8  -5   16.10    7.00
  -4  -8   5  265.07   32.30
   4  -8  -5  314.87   30.20
   4  -8  -5  295.77   27.80
  -4  -8   5  357.36   33.00
  -4  -8   5  325.17   28.60
   4   8  -5  288.27   32.20
   4   8  -5  334.67   26.80
  -4   8   5  339.87   29.20
   4   8  -5  307.87   28.40
  -4   8   5  354.26   33.40
  -2  -8   5  220.98   28.70
  -2  -8   5  268.67   24.90
   2  -8  -5  268.67   24.50
  -2  -8   5  287.87   29.70
   2  -8  -5  261.87   26.90
  -2   8   5  299.37   29.00
  -2   8   5  257.17   25.00
   2   8  -5  287.57   23.20
   2   8  -5  253.27   29.20
  -2   8   5  299.67   25.70
   2   8  -5  280.37   24.90
   0  -8   5  594.64   52.09
   0  -8  -5  603.44   50.99
   0  -8   5  650.03   56.09
   0  -8  -5  661.43   53.59
   0  -8   5  599.34   49.20
   0   8   5  641.64   53.89
   0   8  -5  617.44   50.89
   0   8   5  613.34   51.39
   0   8   5  560.04   50.99
   0   8  -5  635.14   49.60
   0   8  -5  614.94   56.49
   2  -8   5   24.40    4.60
   2  -8   5   26.00   10.00
  -2  -8  -5   45.80   11.10
   2  -8   5   22.20    6.20
   2   8   5   28.30    7.40
   2   8   5   19.00    6.30
  -2   8  -5   29.60    5.50
   2   8   5   26.00    9.60
  -2   8  -5   20.90    5.60
   2   8   5   20.50    6.20
   4  -8   5   15.80    5.30
   4  -8   5   25.70    4.80
   4  -8   5   28.20   10.50
  -4  -8  -5   13.70    8.30
  -4   8  -5   24.80    5.10
   4   8   5    3.50    8.00
  -4   8  -5   13.40    5.40
   4   8   5   19.00    5.60
   4   8   5   27.20    6.50
   6  -8   5  237.68   21.70
   6  -8   5  222.48   30.80
  -6  -8  -5  259.47   27.40
  -6   8  -5  251.67   23.00
  -6   8  -5  268.07   22.50
   6   8   5  235.58   23.40
   6   8   5  249.38   23.30
   8  -8   5  316.87   39.60
  -8  -8  -5  320.67   38.50
   8   8   5  369.46   31.70
   8   8   5  375.26   35.20
  -8   8  -5  378.46   30.40
   8   8   5  286.57   35.90
  10  -8   5  593.64   66.29
  10  -8   5  707.13   57.29
  10   8   5  676.03   63.69
 -10   8  -5  764.42   57.19
  10   8   5  741.03   58.79
  12  -8   5  364.66   45.30
  12   8   5  332.37   40.50
  12   8   5  381.56   35.30
 -12   8  -5  440.36   33.40
  14  -8   5  389.26   50.79
  14  -8   5  485.95   44.30
  14   8   5  430.36   47.10
 -14   8  -5  490.05   38.00
  16  -8   5   24.50    9.50
  16  -8   5    5.50   14.50
  16   8   5   26.40   13.30
  18  -8   5   -6.10    9.90
  18  -8   5  -18.00   19.00
  18   8   5   -7.90   12.30
  23  -9  -5   95.39   17.70
 -23  -9   5   63.49   17.80
  23   9  -5   79.29   24.30
 -23   9   5  103.59   16.20
  21  -9  -5   50.29   12.60
 -21  -9   5   33.40   10.80
 -21  -9   5   24.80    8.90
  21   9  -5   27.40   15.80
 -21   9   5   55.89   12.20
 -19  -9   5   -4.00    6.30
  19  -9  -5    0.90    6.70
 -19  -9   5   -7.30    6.80
  19   9  -5   -8.70   11.20
 -19   9   5   16.90   13.40
 -17  -9   5  211.28   24.60
  17  -9  -5  238.28   24.60
 -17  -9   5  265.47   27.50
 -17   9   5  223.38   25.10
  15  -9  -5  912.71   74.89
 -15  -9   5 1023.20   78.09
 -15  -9   5  877.91   74.79
 -15   9   5  926.91   75.49
  15   9  -5  740.73   82.59
  13  -9  -5  826.72   66.59
 -13  -9   5  765.72   66.79
 -13  -9   5  918.91   70.49
 -13   9   5  771.82   67.29
  13   9  -5  672.63   74.59
  13   9  -5  824.82   65.39
 -11  -9   5  718.83   62.49
 -11  -9   5  827.42   66.29
 -11   9   5  753.72   63.09
  11   9  -5  709.83   60.79
  -9  -9   5  381.86   36.40
  -9  -9   5  367.96   32.30
   9   9  -5  278.57   34.70
   9   9  -5  377.06   30.40
  -9   9   5  357.06   32.40
   7  -9  -5   36.70   13.70
   7  -9  -5   85.39   13.30
  -7  -9   5   59.19   10.00
  -7  -9   5   91.39   16.90
   7   9  -5   55.29   12.50
  -7   9   5   59.69   10.00
   7   9  -5   70.39    9.20
  -5  -9   5  132.99   17.10
   5  -9  -5  152.78   19.60
  -5  -9   5  160.98   22.00
   5   9  -5  170.68   15.30
  -5   9   5  166.98   17.90
  -3  -9   5  520.25   46.50
   3  -9  -5  468.35   43.30
  -3  -9   5  407.56   41.00
  -3   9   5  488.65   45.80
  -3   9   5  492.35   41.90
   3   9  -5  520.25   39.80
  -1  -9   5 1143.99   94.09
   1  -9  -5 1067.79   90.99
  -1  -9   5 1101.69   86.99
  -1  -9   5 1027.30   88.69
   1   9  -5 1146.69   87.39
  -1   9   5 1113.99   89.29
  -1   9   5 1130.49   92.19
   1  -9   5  577.64   52.49
   1  -9   5  606.14   50.79
   1  -9   5  655.73   58.79
  -1  -9  -5  629.44   55.69
   1   9   5  674.73   55.59
  -1   9  -5  664.93   51.49
   1   9   5  624.64   52.99
   3  -9   5  115.69   11.40
  -3  -9  -5  122.19   19.70
   3  -9   5   99.09   13.70
   3  -9   5   78.29   16.50
   3   9   5  112.69   14.20
  -3   9  -5   95.89   13.00
   3   9   5  118.79   15.70
  -3   9  -5  117.99   12.40
   3   9   5  113.29   18.60
  -5  -9  -5   -3.40    8.10
   5  -9   5   21.30    4.90
   5  -9   5   13.30   10.70
   5   9   5    9.30   10.10
   5   9   5   12.80    5.70
   5   9   5   19.60    6.10
  -5   9  -5   13.10    5.20
  -5   9  -5   17.40    5.60
   7  -9   5  272.27   24.50
   7  -9   5  246.48   34.70
   7   9   5  284.67   26.00
   7   9   5  212.08   31.30
  -7   9  -5  303.57   25.50
   7   9   5  299.27   26.70
  -7   9  -5  279.97   25.50
   9  -9   5  706.73   57.59
   9  -9   5  673.63   67.99
   9   9   5  733.93   59.49
   9   9   5  631.74   64.39
  -9   9  -5  821.62   58.29
   9   9   5  649.34   59.29
  11  -9   5  467.35   54.29
  11   9   5  549.74   45.20
 -11   9  -5  529.55   43.70
  11   9   5  481.05   50.99
  13   9   5  139.99   24.70
  13   9   5  162.78   19.20
 -13   9  -5  151.98   16.80
  15  -9   5   93.09   15.20
  15  -9   5   33.00   19.70
  15   9   5   64.39   18.40
  15   9   5  109.89   14.80
 -15   9  -5   67.99    9.70
  17  -9   5   -9.50   13.00
  17  -9   5   10.10   10.40
  17   9   5   -6.70    6.30
  17   9   5   11.90   13.80
 -20 -10   5   61.19   13.40
 -20 -10   5   58.39   12.80
  20 -10  -5   54.99   12.80
 -20  10   5   41.80   11.60
  20  10  -5   63.89   18.80
 -18 -10   5   -0.50    8.10
 -18 -10   5    3.30    7.70
  18 -10  -5    1.00    6.70
  18  10  -5   -2.90    6.10
 -18  10   5    4.40    7.90
  18  10  -5   -1.50   12.90
 -16 -10   5    1.30    7.10
  16 -10  -5    2.40    7.00
 -16 -10   5   -1.10    7.40
 -16  10   5    7.40    7.40
  16  10  -5   16.10    6.20
  16  10  -5   -6.00   12.60
 -14 -10   5   44.80   11.20
  14 -10  -5   47.90   10.30
 -14 -10   5   25.30    8.40
 -14  10   5   30.70    9.10
  14  10  -5   28.10   15.00
  14  10  -5   46.10    8.60
 -12 -10   5  141.29   20.80
  12  10  -5  104.59   14.00
 -12  10   5  118.99   16.90
 -10 -10   5    0.90    6.40
 -10 -10   5   -4.60    7.60
  10 -10  -5   -1.00   11.70
 -10  10   5    8.50    7.50
  10  10  -5   -0.10    5.60
   8 -10  -5   71.69   14.70
  -8 -10   5  126.99   21.00
  -8  10   5  108.69   15.20
   8  10  -5   92.79   12.50
  -6 -10   5   67.19   13.60
   6 -10  -5   71.99   13.70
  -6 -10   5   67.49   11.10
  -6  10   5   95.49   14.40
   6  10  -5   86.29   11.10
  -4 -10   5  266.77   30.20
  -4 -10   5  230.78   24.00
   4 -10  -5  254.67   26.70
   4  10  -5  208.98   21.70
  -4  10   5  241.58   24.00
  -2 -10   5  267.67   27.90
   2 -10  -5  300.97   30.40
  -2 -10   5  292.17   34.10
   2  10  -5  305.07   26.20
  -2  10   5  306.57   28.50
   0 -10   5   62.49   11.50
   0 -10   5  107.29   18.60
   0 -10  -5   66.99   17.50
   0 -10   5   99.39   10.40
   0 -10  -5   81.79   15.60
   0  10   5   90.79   13.80
   0  10   5   99.89   16.60
   0  10  -5   86.69   11.60
  -2 -10  -5   40.50   12.30
  -2 -10  -5   19.10   12.30
   2 -10   5   18.80    7.30
   2 -10   5   23.50   11.00
   2 -10   5   28.10    5.70
   2  10   5   31.30    8.80
  -2  10  -5   28.80    7.00
   2  10   5   27.60    7.90
   4 -10   5   14.10    4.80
  -4 -10  -5   16.20   10.30
   4 -10   5   14.30   10.30
  -4  10  -5   25.20    6.60
   4  10   5    4.20    9.90
   4  10   5   17.20    6.70
   4  10   5   12.50    6.90
   6 -10   5    1.40    4.30
   6 -10   5   -2.70    9.50
   6  10   5    1.70    8.90
  -6  10  -5   -5.60    9.50
   6  10   5   -2.60    5.50
   6  10   5    2.90    5.10
   8 -10   5   47.30    8.10
   8 -10   5   32.10   15.00
   8  10   5   65.59   10.90
   8  10   5   55.39   15.20
  -8  10  -5   63.29    9.90
   8  10   5   44.80    9.20
  10 -10   5   20.70   14.50
  10  10   5    8.50   11.70
  10  10   5   48.00   10.40
  12 -10   5   28.90   21.50
  12  10   5   40.40    9.90
 -12  10  -5   25.70    7.80
  12  10   5   29.60   14.50
  14 -10   5    0.90   13.40
  14  10   5   24.70   13.60
  14  10   5   37.20   10.70
  16 -10   5   -0.60   14.70
  16 -10   5   10.80   10.00
  16  10   5    8.70   13.30
  16  10   5   26.30   10.60
 -19 -11   5   39.20   11.20
  19 -11  -5   70.69   13.00
 -19 -11   5   54.69   13.20
  19  11  -5   50.49   10.00
 -19  11   5   42.30   11.20
  19  11  -5   38.80   18.80
 -17 -11   5  180.88   24.00
 -17 -11   5  223.38   27.60
  17 -11  -5  217.08   24.20
 -17  11   5  210.48   24.80
  17  11  -5  201.58   36.20
  17  11  -5  218.78   22.30
  15 -11  -5  115.69   15.80
 -15 -11   5   76.99   15.70
  15  11  -5   93.19   23.10
  15  11  -5   80.79   12.10
 -13 -11   5  321.37   31.20
 -13 -11   5  324.57   34.60
  13  11  -5  312.37   28.50
 -13  11   5  288.67   30.80
 -11 -11   5  385.76   38.50
 -11 -11   5  324.17   33.60
  11  11  -5  355.96   31.60
 -11  11   5  361.16   34.40
  -9 -11   5  197.08   22.50
   9 -11  -5  193.88   24.50
  -9 -11   5  185.18   27.20
   9  11  -5  216.48   20.10
  -9  11   5  208.98   23.00
   7 -11  -5   42.30   17.10
  -7 -11   5   59.79   13.70
  -7 -11   5   62.99   10.80
   7 -11  -5   76.29   15.90
  -7  11   5  115.79   15.20
   7  11  -5   93.29   11.40
  -5 -11   5   -0.90    8.60
   5 -11  -5   -3.10   11.10
   5 -11  -5   43.00   16.50
  -5 -11   5    1.00    5.90
   5  11  -5   -6.10    5.00
  -5  11   5    1.90    7.30
   3 -11  -5   -9.40   10.90
  -3 -11   5   -6.80    5.70
   3 -11  -5    2.20    8.70
  -3 -11   5  -11.20    8.50
  -3  11   5    9.70    7.80
   3  11  -5   -5.20    5.20
  -1 -11   5   13.40    7.10
  -1 -11   5    5.30    9.50
   1 -11  -5   24.50   10.50
   1 -11  -5    0.40   10.30
   1  11  -5   24.10    6.90
  -1  11   5   25.80    8.60
  -1 -11  -5    3.40    9.80
   1 -11   5    5.50    6.20
  -1 -11  -5   -4.40    9.40
   1 -11   5   17.40    5.50
   1 -11   5    4.00   10.40
   1  11   5   12.90    7.30
  -1  11  -5    8.30    5.90
   3 -11   5  -10.30    8.40
  -3 -11  -5   -2.70    9.80
   3 -11   5    3.70    4.30
   3  11   5   -8.40    5.70
  -3  11  -5   -2.60    5.10
   3  11   5   -7.20    5.10
   5 -11   5   -9.20    9.20
   5 -11   5    5.10    4.80
   5  11   5   -8.20    4.90
  -5  11  -5   -6.70    4.80
   5  11   5   -6.90    5.30
   7 -11   5   76.39   19.50
   7  11   5   99.89   14.90
   7  11   5   82.59   18.90
  -7  11  -5  123.19   13.90
   7  11   5   99.09   14.90
   9 -11   5   12.70   20.60
   9  11   5   29.00    7.60
   9  11   5   36.10   10.60
   9  11   5   34.60   16.10
  -9  11  -5   33.60    8.60
  11 -11   5    8.00   14.30
  11  11   5   31.80    9.70
  11  11   5   49.40   16.60
  13 -11   5   93.49   24.10
  13  11   5  128.39   31.80
 -18 -12   5   48.20   13.40
  18  12  -5   44.00   20.50
 -16 -12   5  498.25   48.10
 -16 -12   5  464.65   44.40
  16 -12  -5  441.86   43.50
 -16  12   5  466.85   44.80
  16  12  -5  503.95   42.10
 -14 -12   5  666.13   63.29
 -14 -12   5  747.13   67.39
 -14  12   5  766.52   64.39
  14  12  -5  764.02   61.49
 -12 -12   5  811.62   76.59
 -12 -12   5  938.81   81.29
 -12  12   5  981.70   84.79
  12  12  -5  956.20   74.99
 -10 -12   5  729.53   66.79
  10  12  -5  739.73   59.99
 -10  12   5  699.73   62.19
  -8 -12   5   62.29   15.10
  -8 -12   5   57.29   12.10
   8  12  -5   81.69   11.20
  -8  12   5   67.79   13.10
   6 -12  -5   44.70   11.30
  -6 -12   5   24.40   11.60
  -6 -12   5    9.40    6.80
   6 -12  -5   15.50   14.20
   6  12  -5   42.40    7.90
  -6  12   5   38.90   11.10
  -4 -12   5   54.29   13.90
  -4 -12   5   53.19   10.20
   4 -12  -5   36.90   14.90
   4  12  -5   77.59   10.70
  -4  12   5   71.99   11.60
  -2 -12   5  176.98   28.30
  -2 -12   5  122.29   19.40
   2 -12  -5  192.78   26.70
   2  12  -5  183.18   22.90
  -2  12   5  178.98   20.60
   0 -12   5  169.08   16.80
   0 -12   5  137.99   19.70
   0 -12   5  162.48   28.30
   0  12  -5  177.98   18.20
   0  12   5  161.88   20.20
   2 -12   5   88.19   12.20
   2  12   5  115.39   16.30
  -2  12  -5  113.29   14.00
   4 -12   5   22.10   15.20
   4 -12   5   42.50    9.00
  -4  12  -5   40.90    8.40
   4  12   5   21.60    8.80
   6 -12   5  212.78   35.70
   6  12   5  205.58   25.70
   6  12   5  257.67   29.60
  -6  12  -5  281.77   24.10
   8 -12   5  258.37   41.60
   8  12   5  251.57   36.90
   8  12   5  268.47   36.00
   8  12   5  332.77   30.10
  -8  12  -5  331.47   28.70
  10 -12   5  335.77   48.00
  10  12   5  323.17   33.70
 -10  12  -5  441.36   35.30
  10  12   5  345.97   42.50
  10  12   5  420.86   36.30
  12  12   5  215.38   32.10
  12  12   5  198.88   24.00
  15 -13  -5  375.96   35.40
 -15 -13   5  305.27   35.50
 -15 -13   5  369.86   40.60
  15  13  -5  369.46   33.50
 -13 -13   5  533.05   53.19
 -13 -13   5  441.06   47.90
  13  13  -5  584.44   46.60
 -13  13   5  571.14   49.80
 -11 -13   5  542.45   53.39
 -11 -13   5  448.26   47.10
  11  13  -5  560.54   45.60
 -11  13   5  534.15   48.30
  -9 -13   5  254.77   34.20
  -9 -13   5  252.87   28.20
   9  13  -5  279.07   26.10
  -9  13   5  259.67   28.40
  -7 -13   5  148.89   25.60
   7 -13  -5   52.59   22.90
  -7 -13   5   90.09   14.30
  -5 -13   5   49.40   15.70
  -5 -13   5   26.90    9.30
   5 -13  -5   21.30   14.60
   5  13  -5   33.90    8.40
  -5  13   5   26.20   10.50
  -3 -13   5   18.30   13.00
   3 -13  -5    6.50   14.20
  -3 -13   5   16.30   10.60
  -3  13   5   30.00    9.80
   3  13  -5   23.10    7.50
  -1 -13   5   14.90   16.70
   1 -13  -5  -12.40   10.90
  -1  13   5   10.90    8.60
   1  13  -5    8.90    6.70
   1 -13   5   22.40   13.80
  -1 -13  -5   11.10   13.80
  -1  13  -5   30.30    8.40
   1  13   5   17.50   14.80
   3 -13   5   51.29   17.10
  -3 -13  -5   27.00   16.00
   3  13   5   70.49   13.30
  -3  13  -5   75.49   11.40
   5 -13   5   49.50   17.80
  -5  13  -5   80.29   12.20
   5  13   5   62.19   13.60
   7 -13   5  207.78   39.40
  -7  13  -5  270.37   26.10
   7  13   5  276.47   27.90
   9 -13   5   98.09   24.80
   9  13   5  183.38   20.90
   9  13   5  141.59   22.60
  -9  13  -5  181.98   20.10
 -10 -14   5   45.00   16.70
 -10 -14   5   30.90   10.50
  10 -14  -5   10.50   15.40
  10  14  -5   64.19   11.30
 -10  14   5   39.80   11.90
  -8 -14   5   63.49   13.50
   8 -14  -5   42.50   20.00
  -8  14   5   83.79   15.90
   8  14  -5   88.69   12.60
   6 -14  -5   30.00   19.40
  -6 -14   5   37.40   10.60
  -6 -14   5   45.70   14.90
   6  14  -5   61.29   11.00
  -6  14   5   46.80   12.80
   4 -14  -5   30.30   28.40
  -4 -14   5   57.19   17.60
  -4  14   5   65.29   14.50
   4  14  -5   69.79   11.50
   2 -14  -5    9.20   15.70
  -2 -14   5   22.30   14.90
  -2  14   5   36.80   11.90
   2  14  -5   36.00    9.10
   0 -14   5   55.89   19.90
   0  14  -5   83.89   12.80
   0  14   5   79.39   14.30
  -2 -14  -5   46.50   17.30
   2 -14   5   59.59   18.50
   2  14   5  118.89   17.40
   4 -14   5   83.09   22.70
   4  14   5  121.89   18.60
  -4  14  -5  130.49   17.00
 -28   0   6  489.05   39.20
  28   0  -6  391.36   48.80
  26   0  -6   74.79   20.40
 -26   0   6  104.19   13.40
  24   0  -6   14.30   12.80
 -24   0   6   18.70    6.10
  22   0  -6   13.30   10.70
 -22   0   6   11.90    5.60
 -20   0   6  367.76   29.80
 -20   0   6  293.67   39.20
  20   0  -6  332.27   35.10
 -18   0   6 1034.50   78.89
  18   0  -6  925.71   85.19
 -18   0   6 1082.29   81.49
  18   0  -6  874.51   80.59
  16   0  -6  231.58   27.10
  16   0  -6  258.97   23.90
 -16   0   6  310.97   26.50
 -16   0   6  274.97   24.20
 -14   0   6  380.46   30.90
  14   0  -6  316.47   28.50
 -14   0   6  350.16   29.10
  14   0  -6  305.77   31.50
  12   0  -6  359.56   30.80
  12   0  -6  330.17   33.40
 -12   0   6  359.16   31.40
 -12   0   6  434.96   32.80
 -10   0   6 3303.17  278.27
  10   0  -6 3295.67  279.57
 -10   0   6 4089.19  279.37
 -10   0   6 3648.54  277.77
  10   0  -6 3614.04  277.77
   8   0  -6 4737.23  402.66
  -8   0   6 5427.16  401.16
  -8   0   6 4804.92  401.86
  -8   0   6 5782.92  402.56
   8   0  -6 5241.98  401.16
  -6   0   6 6517.85  542.85
  -6   0   6 7417.16  541.95
  -6   0   6 6773.82  543.05
   6   0  -6 7422.96  541.95
  -4   0   6 6591.64  552.14
   4   0  -6 7535.05  551.24
  -4   0   6 7341.17  551.24
  -2   0   6 1367.36  104.99
  -2   0   6 1219.38  105.69
   2   0  -6 1467.55  105.09
   0   0   6  934.41   72.99
   0   0   6  992.70   72.49
   0   0   6  851.31   74.59
   2   0   6  608.64   50.39
   2   0   6  606.94   51.99
   2   0   6  693.93   51.29
   4   0   6  538.95   44.00
   4   0   6  568.84   44.10
   4   0   6  497.05   42.40
   6   0   6 2957.90  227.88
   6   0   6 2723.13  225.58
   6   0   6 3083.29  227.48
   8   0   6   85.29   10.40
  -8   0  -6   61.79    9.40
   8   0   6   74.99   11.00
  10   0   6   82.29   11.40
 -10   0  -6   62.29    9.70
  12   0   6  582.64   51.39
  12   0   6  684.33   53.99
 -12   0  -6  594.84   50.69
  14   0   6  741.33   69.39
  14   0   6  973.40   73.09
 -14   0  -6  863.01   69.09
  16   0   6 1271.17   95.79
 -16   0  -6 1033.10   90.69
 -18   0  -6  679.43   60.69
  18   0   6  838.82   66.99
  20   0   6  484.55   48.80
  22   0   6  103.79   20.30
  29  -1  -6  284.67   38.30
  29   1  -6  316.57   39.70
 -27  -1   6   41.40    7.80
  27  -1  -6   31.30   15.60
 -27   1   6   31.10    7.60
  27   1  -6   25.50   14.60
 -25  -1   6   50.89    8.90
  25  -1  -6   49.20   16.70
  25   1  -6   80.29   20.40
 -25   1   6   66.69    9.50
 -23  -1   6   72.39   10.00
  23  -1  -6   74.99   16.10
 -23  -1   6   59.59   19.70
 -23   1   6   67.99   11.30
  23   1  -6   41.20   14.70
 -21  -1   6   32.80    7.80
  21  -1  -6   17.90    9.80
 -21   1   6   27.30    6.60
  21   1  -6   36.10   14.40
  19  -1  -6   -0.80    7.90
 -19  -1   6    6.80    4.50
 -19   1   6    4.10   10.60
  19   1  -6    8.20    9.30
 -19   1   6   13.10    6.80
 -19   1   6   -1.00    4.40
 -17  -1   6  715.43   52.99
  17  -1  -6  567.84   49.30
  17  -1  -6  594.44   52.39
 -17  -1   6  668.73   49.50
  17   1  -6  556.14   60.89
 -17   1   6  607.24   49.50
 -17   1   6  687.73   51.39
  17   1  -6  582.24   49.20
 -17   1   6  515.85   56.39
  17   1  -6  496.85   49.10
 -15  -1   6   46.50    6.90
 -15  -1   6   50.59    9.50
  15  -1  -6   41.70    9.90
 -15   1   6   35.20    6.70
  15   1  -6   49.70   12.30
  15   1  -6   57.69    7.70
  15   1  -6   32.70    6.40
 -15   1   6   67.59    9.90
  13  -1  -6  163.68   14.90
 -13  -1   6  176.28   18.00
 -13  -1   6  158.18   15.20
  13  -1  -6  153.48   17.40
  13   1  -6  133.69   15.00
  13   1  -6  136.49   18.80
 -13   1   6  168.48   16.00
 -13   1   6  149.59   15.40
  13   1  -6  152.68   14.60
 -13   1   6  160.18   15.10
 -11  -1   6  725.93   54.29
 -11  -1   6  643.34   52.19
  11  -1  -6  672.33   51.79
  11  -1  -6  623.54   53.19
  11   1  -6  647.74   51.39
 -11   1   6  591.04   52.19
 -11   1   6  656.33   51.79
  11   1  -6  578.94   54.59
  11   1  -6  565.84   51.99
 -11   1   6  736.83   52.49
   9  -1  -6 1993.30  156.08
  -9  -1   6 2067.59  155.68
  -9  -1   6 2077.49  157.08
   9  -1  -6 2028.30  154.98
  -9   1   6 1856.81  155.68
   9   1  -6 1887.71  157.58
   9   1  -6 2076.19  154.68
   9   1  -6 1873.71  155.58
  -9   1   6 2074.09  155.08
   7  -1  -6 2601.94  197.88
  -7  -1   6 2643.44  197.38
   7   1  -6 2647.34  197.38
  -7   1   6 2644.64  197.88
   7   1  -6 2287.37  199.78
  -7   1   6 2936.91  198.08
  -7   1   6 2334.77  198.58
   7   1  -6 2311.47  198.38
  -5  -1   6 6238.18  443.06
  -5  -1   6 5349.77  444.86
  -5  -1   6 5739.23  443.86
  -5   1   6 5824.42  443.26
   5   1  -6 6015.80  442.66
   5   1  -6 5309.17  443.86
  -3  -1   6 2537.55  196.48
   3  -1  -6 2661.83  197.28
  -3  -1   6 2430.76  197.68
   3   1  -6 2332.07  197.68
  -3   1   6 2650.93  197.28
   3   1  -6 2673.13  196.58
  -1  -1   6  507.95   46.20
  -1  -1   6  543.85   44.20
  -1  -1   6  591.84   43.40
  -1   1   6  591.94   43.80
   1   1  -6  502.35   44.10
  -1   1   6  567.94   43.90
   1  -1   6  203.38   17.10
   1  -1   6  181.18   19.00
   1   1   6  207.18   17.20
   1   1   6  210.38   17.50
   3  -1   6    4.10    2.50
   3  -1   6    8.50    3.90
  -3   1  -6    3.40    3.20
   3   1   6    5.80    3.10
   3   1   6    9.60    3.90
   5  -1   6   79.49   10.50
   5  -1   6   73.39    7.30
   5  -1   6   76.09   10.00
   5   1   6   77.09   10.10
  -5   1  -6   62.29    9.80
   5   1   6   82.49    8.90
   7  -1   6   76.99   10.90
   7  -1   6   79.29   10.80
   7   1   6   70.49   10.70
   7   1   6   76.29    9.00
  -7   1  -6   63.79   10.10
   9  -1   6   -0.90    4.50
  -9   1  -6    2.70    3.50
   9   1   6    4.20    5.40
   9   1   6   -1.40    2.20
   9   1   6    8.40    3.60
  11  -1   6  183.38   20.60
  11  -1   6  208.68   20.90
  11   1   6  162.88   17.70
  11   1   6  186.68   21.10
 -11   1  -6  177.28   19.20
  13  -1   6  320.97   32.40
  13   1   6  356.76   33.40
 -13   1  -6  331.87   30.90
  15  -1   6  477.25   50.09
  15  -1   6  615.84   52.29
 -15   1  -6  618.44   49.90
  15   1   6  610.24   52.59
  17  -1   6  470.85   45.50
 -17   1  -6  452.05   41.90
  17   1   6  503.15   46.00
  19  -1   6  329.67   48.60
 -19   1  -6  314.07   31.00
  21  -1   6  157.58   25.60
  21   1   6  145.69   25.50
 -21   1  -6  113.59   18.20
  28  -2  -6    1.30   12.20
 -28  -2   6   -9.00    5.30
 -28   2   6  -12.20    5.20
  28   2  -6   -2.20   13.10
 -26  -2   6   16.10    6.50
  26  -2  -6   27.30   13.00
  26   2  -6   23.50   23.60
 -26   2   6   14.10    6.10
 -24  -2   6   -2.00   14.80
 -24  -2   6   31.40    7.50
  24  -2  -6   35.50   13.40
  24   2  -6   19.80   13.00
 -22  -2   6  261.67   23.40
  22  -2  -6  239.08   28.80
  22   2  -6  219.08   31.00
  22   2  -6  222.48   23.50
 -22   2   6  271.77   23.60
  20  -2  -6  249.28   26.60
 -20  -2   6  255.97   27.80
  20   2  -6  172.38   28.00
 -20   2   6  261.17   22.30
 -20   2   6  256.27   24.30
  20   2  -6  184.48   21.40
  18  -2  -6  177.38   20.90
 -18  -2   6  179.18   17.10
 -18  -2   6  206.48   23.90
 -18   2   6  154.18   17.30
  18   2  -6  142.79   22.90
  18   2  -6  166.98   16.80
 -18   2   6  151.78   27.30
 -18   2   6  167.68   19.80
  16  -2  -6  244.08   23.60
 -16  -2   6  273.47   25.50
  16  -2  -6  212.68   21.00
 -16  -2   6  262.87   21.20
 -16   2   6  170.58   28.40
 -16   2   6  230.88   21.80
 -16   2   6  217.38   21.20
  16   2  -6  218.08   28.10
 -16   2   6  222.98   21.40
  16   2  -6  211.78   21.00
  14  -2  -6  303.77   26.90
  14  -2  -6  285.87   27.50
 -14  -2   6  355.76   30.30
 -14  -2   6  335.97   26.50
  14   2  -6  311.77   31.30
 -14   2   6  230.68   31.80
 -14   2   6  307.17   26.40
 -14   2   6  323.57   26.60
  14   2  -6  288.17   25.60
  14   2  -6  283.17   26.40
 -14   2   6  296.77   26.60
  12  -2  -6  537.95   46.00
 -12  -2   6  639.04   49.60
  12  -2  -6  587.14   47.10
 -12  -2   6  584.74   46.40
  12   2  -6  517.75   46.30
 -12   2   6  581.54   46.30
 -12   2   6  596.64   46.10
  12   2  -6  588.74   45.60
  12   2  -6  490.95   49.80
 -12   2   6  543.25   46.70
 -10  -2   6  207.58   21.30
  10  -2  -6  196.08   18.50
 -10  -2   6  204.08   18.30
  10  -2  -6  205.58   17.80
  10   2  -6  193.28   17.10
 -10   2   6  202.08   17.90
 -10   2   6  215.48   17.40
  10   2  -6  182.08   18.10
  10   2  -6  177.78   22.40
  -8  -2   6   15.00    4.00
   8  -2  -6   20.20    5.10
   8  -2  -6   15.40    3.50
  -8  -2   6   17.10    6.10
  -8   2   6   23.70    3.50
   8   2  -6   17.50    3.80
   8   2  -6   26.30    3.60
  -8   2   6   24.60    4.60
   8   2  -6   22.00    7.50
  -6  -2   6   10.00    5.60
   6  -2  -6   18.30    3.70
  -6  -2   6   13.60    3.40
  -6   2   6   17.20    3.30
   6   2  -6   17.80    2.50
   6   2  -6    6.30    3.10
  -4  -2   6  324.37   26.20
   4  -2  -6  331.67   25.80
  -4  -2   6  268.97   28.40
   4   2  -6  289.87   26.10
  -4   2   6  352.56   26.00
  -2  -2   6   27.20    5.90
   2  -2  -6   45.10    5.30
  -2  -2   6   42.20    5.50
  -2   2   6   45.40    5.40
  -2   2   6   42.00    4.50
   2   2  -6   32.30    5.10
   0  -2   6  418.46   35.60
   0  -2   6  420.86   32.90
   0   2  -6  381.76   33.00
   0   2   6  407.66   32.90
   0   2   6  409.66   33.10
   2  -2   6  150.08   16.30
   2  -2   6  158.68   13.50
  -2  -2  -6  183.58   14.80
  -2   2  -6  131.49   16.00
  -2   2  -6  149.59   14.20
   2   2   6  154.78   14.70
   2   2   6  147.79   14.10
   4  -2   6 1437.56  103.99
   4  -2   6 1312.57  100.59
  -4  -2  -6 1494.15  102.69
   4   2   6 1116.69  101.59
  -4   2  -6 1179.18  100.79
   4   2   6 1397.56  102.59
  -4   2  -6 1153.98  103.49
   6  -2   6 1245.18  101.39
   6  -2   6 1351.56  102.59
  -6  -2  -6 1378.86  101.59
   6  -2   6 1196.78   98.59
  -6   2  -6 1186.38  102.19
   6   2   6 1292.47  101.59
   8  -2   6  752.82   60.69
  -8  -2  -6  746.93   59.69
   8  -2   6  715.93   59.69
   8   2   6  697.93   57.79
  -8   2  -6  703.23   60.19
   8   2   6  696.73   59.69
 -10  -2  -6  275.57   24.60
  10  -2   6  246.48   25.60
  10  -2   6  235.08   24.00
 -10   2  -6  212.18   23.80
  10   2   6  265.67   25.10
  10   2   6  219.68   20.30
  12  -2   6  119.99   16.60
  12  -2   6  116.89   18.20
  12   2   6  140.69   18.10
 -12   2  -6  106.79   16.00
  12   2   6  118.89   10.70
  14  -2   6  141.89   22.10
  14  -2   6  183.18   21.80
 -14   2  -6  170.18   20.50
  14   2   6  169.28   22.90
  16  -2   6   55.99   12.90
  16  -2   6   67.39   13.00
  16   2   6   86.49   17.30
 -16   2  -6   69.89   12.40
  18  -2   6    6.40   10.50
  18  -2   6   -3.80    7.90
  18   2   6   21.10   13.00
 -18   2  -6   -3.10    8.20
  20  -2   6   20.20   12.60
  20   2   6   20.40   13.40
 -20   2  -6    7.30    8.30
  22  -2   6    5.30   11.30
  22   2   6    0.00   14.10
 -22   2  -6  -14.90    9.00
  27  -3  -6   -9.50   10.20
 -27  -3   6   -4.10    5.80
 -27   3   6   -5.70    5.30
  27   3  -6    2.70   13.30
 -25  -3   6    4.80    6.20
  25  -3  -6    3.30   10.90
 -25   3   6   -4.90    5.30
  25   3  -6   -2.60   13.30
 -23  -3   6  110.19   13.50
  23  -3  -6   81.49   17.60
  23   3  -6   76.79   19.50
 -21  -3   6  840.32   62.89
  21  -3  -6  802.02   66.89
 -21   3   6  806.22   63.19
  21   3  -6  689.43   69.59
  21   3  -6  686.13   62.99
 -19  -3   6 1230.78   89.59
  19  -3  -6 1218.98   93.89
 -19   3   6 1155.58   89.89
  19   3  -6  996.20   89.69
  19   3  -6  985.30   95.19
 -17  -3   6 1062.69   75.99
  17  -3  -6 1044.00   77.89
 -17   3   6  847.62   83.29
  17   3  -6  822.32   75.49
  17   3  -6  861.61   80.99
 -17   3   6 1006.00   76.39
 -17   3   6  922.81   75.89
  17   3  -6  942.71   75.29
  15  -3  -6  794.02   67.49
 -15  -3   6  959.70   67.79
  15  -3  -6  903.11   68.99
 -15  -3   6  968.40   72.19
 -15   3   6  782.62   67.89
  15   3  -6  809.32   66.99
  15   3  -6  726.93   67.49
 -15   3   6  744.13   74.19
 -15   3   6  883.31   67.99
  13  -3  -6   20.10    5.50
 -13  -3   6   16.60    4.50
 -13  -3   6   13.70    7.40
  13  -3  -6    8.00    4.90
 -13   3   6   13.60    8.80
 -13   3   6   15.50    4.80
  13   3  -6   22.10    4.20
  13   3  -6   12.10    4.10
  13   3  -6   12.90    8.50
 -11  -3   6    4.40    3.60
  11  -3  -6    2.40    3.70
  11  -3  -6    0.70    2.90
 -11  -3   6   -6.50    5.10
  11   3  -6    2.50    2.90
 -11   3   6    1.30    3.40
  11   3  -6    1.80    2.50
  11   3  -6    2.20    8.00
 -11   3   6   -2.30    5.50
  -9  -3   6  118.09   16.40
   9  -3  -6  144.39   12.70
   9  -3  -6  134.69   12.90
  -9  -3   6  140.69   13.40
  -9  -3   6  115.49   17.20
   9   3  -6  133.69   13.40
   9   3  -6  116.89   18.50
  -9   3   6  147.59   13.50
  -7  -3   6  623.24   44.60
  -7  -3   6  505.15   47.30
  -7  -3   6  515.95   47.30
   7  -3  -6  535.25   44.00
   7   3  -6  571.84   42.90
   7   3  -6  501.05   47.90
  -7   3   6  541.65   44.20
   7   3  -6  549.65   44.50
   5  -3  -6 4254.27  321.27
  -5  -3   6 3744.43  323.77
  -5  -3   6 4422.86  321.47
  -5  -3   6 3918.41  324.07
   5   3  -6 4080.99  321.57
  -5   3   6 4495.55  321.57
  -3  -3   6   66.19    7.40
  -3  -3   6   59.19   10.00
   3  -3  -6   70.19    7.20
   3   3  -6   65.59    7.30
  -3   3   6   69.99    7.40
   3   3  -6   48.40    9.10
  -1  -3   6   46.40    9.10
  -1  -3   6   50.39    6.40
   1  -3  -6   56.19    5.80
   1  -3  -6   54.39    6.50
  -1   3   6   51.49    6.60
   1   3  -6   43.00    8.80
   1   3  -6   53.09    6.50
   1  -3   6  691.43   53.79
   1  -3   6  738.93   57.19
  -1  -3  -6  748.43   54.29
   1  -3   6  691.13   52.99
   1   3   6  692.43   54.69
   1   3   6  670.23   54.39
  -1   3  -6  614.34   53.89
  -1   3  -6  586.54   56.59
   3  -3   6 3422.96  246.88
   3  -3   6 3107.79  243.18
   3  -3   6 3164.68  243.18
  -3  -3  -6 3366.96  244.68
   3   3   6 3083.29  244.18
  -3   3  -6 2933.91  243.38
   3   3   6 3184.48  244.78
  -3   3  -6 2917.81  246.68
  -5  -3  -6 3568.24  247.78
   5  -3   6 3131.39  245.18
   5  -3   6 3444.06  249.48
   5  -3   6 3140.29  245.78
  -5   3  -6 2890.31  245.48
  -5   3  -6 3004.30  249.18
   5   3   6 3070.49  247.58
   7  -3   6 2581.04  196.28
  -7  -3  -6 2847.42  198.68
   7  -3   6 2494.65  195.18
   7  -3   6 2660.43  200.08
  -7   3  -6 2513.75  199.78
   7   3   6 2321.57  195.88
  -7   3  -6 2323.97  195.38
   7   3   6 2499.75  198.48
   9  -3   6 1385.96  109.19
   9  -3   6 1359.16  111.39
   9  -3   6 1450.25  113.39
  -9  -3  -6 1556.74  112.19
   9   3   6 1329.77  108.39
   9   3   6 1352.16  111.79
  -9   3  -6 1295.17  112.29
  11  -3   6   25.10    6.30
  11  -3   6   27.20    9.20
 -11  -3  -6   24.60    8.90
  11  -3   6   13.60    8.60
 -11   3  -6   16.90    7.00
  11   3   6   17.90    4.10
  11   3   6   19.80    8.20
  13  -3   6   -0.60    6.20
  13  -3   6    1.30    8.10
  13   3   6    2.40    2.80
  13   3   6    0.60    8.30
 -13   3  -6   -2.90    5.60
  15  -3   6   49.20   12.80
  15  -3   6   63.09   13.20
  15   3   6   72.49   16.00
 -15   3  -6   52.59   11.50
  17  -3   6    5.40    9.20
  17  -3   6    4.70    8.70
  17   3   6    0.70   10.00
 -17   3  -6    6.90    7.90
  19  -3   6   31.00   11.60
  19  -3   6   55.19   12.90
 -19   3  -6   33.00   11.70
  19   3   6   60.09   23.50
  21  -3   6    3.20   10.80
  21   3   6   -8.50   11.90
 -28  -4   6   24.10    8.60
  28  -4  -6    8.20   13.10
 -28  -4   6   20.90    9.00
  28   4  -6   15.00   14.60
 -28   4   6    4.40    6.00
 -26  -4   6  -17.40   15.30
  26  -4  -6   18.20   13.10
 -26  -4   6   22.70    7.80
  26   4  -6    7.60   13.10
 -26   4   6    2.50    5.60
 -24  -4   6   13.60    6.30
  24  -4  -6    9.70   10.70
  24   4  -6    5.40   12.60
 -24   4   6    3.50    6.10
  22  -4  -6  181.08   22.90
 -22  -4   6  168.88   17.80
 -22   4   6  165.98   17.90
  22   4  -6   99.39   23.10
  20  -4  -6  570.64   47.10
 -20  -4   6  566.04   43.70
 -20   4   6  485.65   45.20
  20   4  -6  403.86   49.90
  18  -4  -6  972.40   73.39
 -18  -4   6  968.20   71.09
  18   4  -6  840.42   77.79
 -18   4   6  841.52   71.39
  18   4  -6  823.02   70.89
 -18   4   6  925.31   71.99
  18   4  -6  768.22   70.99
 -16  -4   6 1100.19   78.59
  16  -4  -6 1032.10   79.09
  16   4  -6  871.51   83.59
 -16   4   6 1010.90   99.49
  16   4  -6  822.62   77.59
 -16   4   6  979.80   78.29
 -14  -4   6  606.74   45.40
  14  -4  -6  593.34   46.00
 -14  -4   6  611.54   50.19
 -14  -4   6  480.65   48.00
  14  -4  -6  509.75   45.10
  14   4  -6  510.55   53.59
 -14   4   6  571.04   45.80
 -14   4   6  507.75   52.39
  14   4  -6  527.65   45.50
 -12  -4   6    5.00    7.60
  12  -4  -6    1.70    3.90
  12  -4  -6   -0.20    3.10
 -12  -4   6   -1.30    4.30
 -12  -4   6    2.20    3.40
 -12   4   6    1.20    8.50
 -12   4   6   -0.10    3.70
  12   4  -6    3.20    3.00
  12   4  -6   -3.40    7.50
  10  -4  -6  148.69   13.40
 -10  -4   6  147.59   13.90
 -10  -4   6  130.19   17.10
  10  -4  -6  146.49   12.90
 -10  -4   6  135.49   18.10
 -10   4   6  109.19   19.60
 -10   4   6  132.79   13.80
  10   4  -6  121.29   13.50
  10   4  -6  126.49   19.20
  -8  -4   6 3340.37  274.77
  -8  -4   6 3430.86  274.47
   8  -4  -6 3559.74  271.27
  -8  -4   6 3937.41  271.67
  -8   4   6 3823.82  271.77
   8   4  -6 3391.36  271.47
  -8   4   6 3111.79  275.57
   8   4  -6 3376.96  275.57
  -6  -4   6 1798.52  137.99
   6  -4  -6 1749.53  134.59
  -6  -4   6 1836.92  134.79
  -6  -4   6 1611.34  137.89
  -6   4   6 1909.31  135.09
   6   4  -6 1680.53  134.79
  -6   4   6 1457.65  138.19
  -4  -4   6 3254.87  279.77
  -4  -4   6 3755.72  280.07
   4  -4  -6 3613.94  276.87
  -4  -4   6 3833.62  276.87
   4   4  -6 3579.54  276.97
  -4   4   6 2977.80  279.57
  -4   4   6 3990.00  277.37
   2  -4  -6   26.20    5.00
  -2  -4   6   29.10    4.80
  -2  -4   6   17.40    5.70
   2  -4  -6   36.20    4.80
  -2   4   6   24.20    5.00
   2   4  -6   24.30    4.40
  -2   4   6   28.60    7.70
   2   4  -6   15.70    5.90
  -2   4   6   25.00    5.30
   0  -4  -6  227.38   18.40
   0  -4   6  222.88   18.30
   0  -4   6  235.28   22.10
   0   4   6  206.18   19.00
   0   4   6  172.78   19.20
   0   4  -6  196.28   18.30
   2  -4   6 1473.45  117.49
   2  -4   6 1671.73  122.09
  -2  -4  -6 1634.44  119.19
   2  -4   6 1561.14  118.09
   2   4   6 1496.15  118.99
  -2   4  -6 1389.96  121.89
   2   4   6 1465.55  119.69
  -2   4  -6 1432.56  118.19
   4  -4   6 2538.55  181.78
   4  -4   6 2283.27  177.08
  -4  -4  -6 2631.24  179.28
   4  -4   6 2315.77  177.18
   4   4   6 2226.48  178.28
   4   4   6 2267.67  179.48
  -4   4  -6 2243.08  177.38
   4   4   6 1949.90  177.98
  -4   4  -6 2138.79  181.38
   6  -4   6 2105.99  153.28
   6  -4   6 1898.01  147.99
  -6  -4  -6 2045.90  150.78
   6  -4   6 1910.91  148.39
  -6   4  -6 1808.22  148.09
   6   4   6 1739.73  148.59
  -6   4  -6 1939.11  153.08
   6   4   6 1825.02  150.98
   8  -4   6  955.80   78.29
   8  -4   6  927.31   73.19
   8  -4   6  831.62   71.99
  -8  -4  -6 1055.69   76.79
   8   4   6  927.81   73.09
   8   4   6  896.31   76.19
  -8   4  -6  934.21   77.69
  -8   4  -6  878.31   72.09
  10  -4   6  114.59   13.10
  10  -4   6   74.79   15.30
  10  -4   6  110.89   15.10
 -10  -4  -6  117.29   15.20
  10   4   6  108.29   17.10
 -10   4  -6  104.99   18.20
  10   4   6   91.39   10.80
  12  -4   6  162.08   16.90
  12  -4   6  155.48   27.30
  12  -4   6  169.18   20.30
 -12   4  -6  158.98   21.70
  12   4   6  167.68   15.30
  12   4   6  149.39   21.60
  14  -4   6   32.30   12.10
  14  -4   6   25.80    8.50
 -14   4  -6   28.40    9.60
  14   4   6   36.80    5.40
  14   4   6   30.30   11.50
  16  -4   6   22.70   10.70
  16  -4   6   18.30    9.10
  16   4   6   23.80   11.30
  16   4   6   24.30    4.80
  18  -4   6   91.09   19.40
  18  -4   6  140.19   21.20
  18   4   6  125.39   12.00
  18   4   6  102.19   20.10
  20  -4   6   -1.10   10.30
  20  -4   6   21.30   10.40
  20   4   6   -1.20   11.90
  27  -5  -6  -18.20   11.60
 -27  -5   6  -12.80    6.70
 -27  -5   6    2.30    8.30
  27   5  -6   -3.60   11.30
 -27   5   6   11.20    6.20
  25  -5  -6   47.00   14.90
 -25  -5   6   34.10   10.40
 -25  -5   6   42.10    9.30
 -25   5   6   45.50    9.20
  25   5  -6   34.30   16.40
  23  -5  -6    8.80   10.60
 -23  -5   6   10.00    6.90
 -23  -5   6   12.30    9.80
 -23   5   6    7.70    5.90
  23   5  -6    6.90   13.00
  21  -5  -6   -0.80    8.20
 -21  -5   6    4.50    8.20
 -21  -5   6   15.10    6.40
 -21   5   6   10.50    5.80
  21   5  -6   13.00   12.90
 -19  -5   6   11.60    5.70
  19  -5  -6    8.70    8.30
 -19  -5   6   -5.00    6.70
  19   5  -6    5.20   11.70
 -19   5   6   -2.40    4.70
 -19   5   6   -1.10    6.20
 -17  -5   6   29.30    8.80
  17  -5  -6   47.60   10.20
 -17  -5   6   43.50    7.40
  17   5  -6   29.60   13.00
 -17   5   6   40.30    8.50
  15  -5  -6   -1.30    5.30
 -15  -5   6    6.90    6.70
 -15  -5   6    3.30    4.60
  15   5  -6    5.80    4.30
  15   5  -6   -2.40    9.90
 -15   5   6   11.90    5.70
 -13  -5   6   40.30    9.40
  13  -5  -6   58.49    8.50
 -13  -5   6   49.10    8.80
 -13  -5   6   47.00   12.50
  13  -5  -6   49.50    7.90
 -13   5   6   45.70    8.30
  13   5  -6   45.10   14.50
 -13   5   6   23.00    9.60
  13   5  -6   33.40    6.80
  11  -5  -6  145.49   13.10
  11  -5  -6  117.59   13.20
 -11  -5   6  131.89   17.10
 -11  -5   6  147.79   14.00
 -11  -5   6  130.49   18.40
  11   5  -6  116.79   13.60
  11   5  -6  138.99   20.90
 -11   5   6  141.99   15.20
 -11   5   6  113.29   20.40
  -9  -5   6   66.59   13.80
  -9  -5   6   87.79    9.90
   9  -5  -6   80.89    8.30
  -9  -5   6   82.59   13.20
   9  -5  -6   79.89    9.10
   9   5  -6   73.99    9.40
  -9   5   6   76.39    9.80
  -9   5   6   56.69   13.10
   9   5  -6   75.19   13.90
   7  -5  -6  630.04   52.79
  -7  -5   6  701.13   56.59
  -7  -5   6  588.94   56.79
  -7  -5   6  725.33   53.19
  -7   5   6  574.84   57.39
  -7   5   6  706.13   53.49
   7   5  -6  638.04   52.99
   5  -5  -6   33.80    6.10
  -5  -5   6   32.10    7.60
  -5  -5   6   18.00    8.40
  -5  -5   6   29.40    5.30
   5   5  -6   27.10    5.30
   5   5  -6   20.80    6.20
  -5   5   6   29.00    5.80
  -5   5   6   38.00    9.70
   3  -5  -6   25.90    5.40
   3  -5  -6   43.10    6.10
  -3  -5   6   31.30    5.40
  -3  -5   6   28.60    7.50
  -3   5   6   22.40    7.80
  -3   5   6   29.20    6.20
   3   5  -6   33.30    5.70
   3   5  -6   24.70    7.00
  -1  -5   6   22.00    4.40
   1  -5  -6   33.90    5.80
  -1  -5   6   22.80    6.90
   1  -5  -6   17.00    4.50
  -1   5   6   22.10    6.10
  -1   5   6   25.60    7.80
  -1   5   6   22.50    5.70
   1   5  -6   15.00    5.80
   1   5  -6   22.00    4.20
   1  -5   6   -3.40    4.60
   1  -5   6    0.80    2.00
  -1  -5  -6    2.00    4.10
   1  -5   6   -3.00    2.70
   1   5   6   -3.90    4.80
   1   5   6    0.40    4.40
  -1   5  -6   -0.10    4.40
   1   5   6   -1.80    3.00
  -1   5  -6    0.70    2.50
   3  -5   6  150.78   17.80
   3  -5   6  125.99   11.30
  -3  -5  -6  127.69   13.90
   3  -5   6  125.69   12.10
  -3   5  -6  125.09   12.10
   3   5   6  105.39   15.00
   3   5   6  119.09   13.10
  -3   5  -6  115.59   16.80
   5  -5   6   53.19    7.70
   5  -5   6   54.19    7.30
  -5  -5  -6   66.29   10.40
   5  -5   6   79.09   14.30
   5   5   6   76.49    8.70
  -5   5  -6   52.39    7.30
   5   5   6   68.89    8.50
   5   5   6   43.20   10.30
   7  -5   6  151.98   21.00
   7  -5   6  107.49   12.10
   7  -5   6  131.19   12.50
  -7  -5  -6  140.39   15.80
   7   5   6  106.69   16.70
   7   5   6  118.29   13.70
  -7   5  -6  131.39   18.00
  -7   5  -6  121.49   11.90
   7   5   6  127.29   13.10
   9  -5   6   10.10    4.30
  -9  -5  -6    7.10    6.30
   9  -5   6    9.70    8.40
   9   5   6   14.20    4.40
  -9   5  -6    9.60    3.10
   9   5   6    5.70    7.60
  -9   5  -6    9.50    6.60
  11  -5   6  431.36   43.20
  11  -5   6  423.46   35.70
  11  -5   6  410.96   38.80
 -11   5  -6  441.36   41.40
  11   5   6  357.06   40.00
  11   5   6  437.86   35.20
  13  -5   6    5.80    9.50
  13  -5   6   12.10    8.00
  13   5   6   -3.50    8.10
  13   5   6   -3.80    4.00
  15  -5   6    1.30   10.10
  15  -5   6    4.40    6.70
  15   5   6   16.10   10.40
  15   5   6    0.40    4.30
  17  -5   6   -4.90   10.40
  17  -5   6    1.20   13.30
  17   5   6    0.70    9.90
  19  -5   6   26.00   11.60
  19  -5   6    7.90   12.30
  19   5   6   21.30   13.30
  19   5   6    3.90    4.90
  21  -5   6  -13.50   10.80
  21  -5   6  -12.60    7.60
  21   5   6   -5.00   12.60
 -26  -6   6  -13.40    6.90
  26  -6  -6   -9.30   10.20
 -26  -6   6    3.20    7.30
 -26   6   6    4.10    5.90
  26   6  -6    9.10   15.10
 -24  -6   6   65.79   13.30
  24  -6  -6   71.29   15.30
 -24  -6   6   73.69   11.50
 -24   6   6   72.29   11.60
  24   6  -6   38.90   16.10
 -22  -6   6  133.99   25.40
 -22  -6   6  122.09   16.40
  22  -6  -6  109.79   18.40
  22   6  -6   78.39   20.10
 -22   6   6  145.99   16.70
 -22   6   6  136.79   18.10
 -20  -6   6  260.87   32.90
  20  -6  -6  297.47   29.80
 -20  -6   6  320.67   28.00
 -20   6   6  301.27   28.90
  20   6  -6  250.27   36.50
 -18  -6   6  684.33   51.69
  18  -6  -6  637.54   54.69
 -18  -6   6  589.54   54.69
  18   6  -6  487.45   58.29
 -18   6   6  627.14   52.29
 -16  -6   6  303.17   31.40
  16  -6  -6  328.97   28.90
 -16  -6   6  320.37   28.30
  16   6  -6  250.17   35.70
 -16   6   6  309.27   28.90
  14  -6  -6   55.79    8.50
 -14  -6   6   41.80    9.80
 -14  -6   6   37.60    7.60
  14   6  -6   18.10   10.50
 -14   6   6   43.70    9.10
  12  -6  -6   22.30    5.70
 -12  -6   6   20.30    7.40
 -12  -6   6   21.60    9.60
 -12  -6   6   22.20    5.50
  12  -6  -6   24.20    5.50
 -12   6   6   21.40    6.00
  12   6  -6   11.50    4.90
 -12   6   6    1.20    8.90
  12   6  -6   10.90   11.20
  10  -6  -6  101.19   10.00
 -10  -6   6  102.69   15.20
 -10  -6   6  110.09   11.70
 -10  -6   6   81.99   15.90
  10  -6  -6   85.59   10.50
 -10   6   6   84.69   11.80
 -10   6   6   82.29   16.40
  10   6  -6   84.69   11.00
  10   6  -6   56.29   14.50
   8  -6  -6  123.49   13.60
  -8  -6   6  142.09   17.60
  -8  -6   6  121.99   18.70
  -8  -6   6  173.48   15.10
   8   6  -6  139.89   14.40
   8   6  -6  145.09   12.50
  -8   6   6  122.19   23.00
  -8   6   6  132.39   14.80
  -6  -6   6  181.18   16.10
  -6  -6   6  178.08   19.80
   6  -6  -6  149.09   15.90
   6   6  -6  174.38   14.00
   6   6  -6  134.09   18.40
  -6   6   6  160.88   21.30
   6   6  -6  161.78   20.20
  -6   6   6  170.78   16.50
   4  -6  -6  872.71   71.19
  -4  -6   6  939.81   71.09
  -4  -6   6 1004.30   75.09
   4  -6  -6  899.61   71.19
   4   6  -6  885.21   71.19
   4   6  -6  745.83   74.29
  -4   6   6  941.51   71.79
  -4   6   6  830.12   74.99
   2  -6  -6  175.18   16.60
  -2  -6   6  162.18   15.60
   2  -6  -6  148.09   15.50
  -2  -6   6  177.78   19.90
  -2   6   6  195.38   16.60
   2   6  -6  135.89   19.00
  -2   6   6  156.98   19.60
   2   6  -6  148.29   15.30
   0  -6   6   33.40    4.10
   0  -6  -6   46.20    7.70
   0  -6   6   23.70    6.90
   0  -6  -6   28.80    8.70
   0  -6   6   29.70    5.50
   0   6  -6   40.30    6.30
   0   6   6   18.00    6.40
   0   6  -6   29.20    4.20
   0   6   6   30.60    7.90
   0   6  -6    9.10    8.30
   0   6   6   26.00    5.70
   2  -6   6  355.26   29.50
   2  -6   6  397.76   36.50
  -2  -6  -6  406.06   32.40
   2  -6   6  357.76   30.40
   2   6   6  381.76   33.60
  -2   6  -6  361.96   30.50
   2   6   6  287.77   32.40
   2   6   6  372.16   32.70
  -2   6  -6  349.07   35.40
   4  -6   6  906.21   70.99
   4  -6   6  780.12   64.39
   4  -6   6  756.72   63.69
  -4  -6  -6  952.70   67.19
   4   6   6  779.92   65.39
   4   6   6  764.32   64.99
  -4   6  -6  808.82   70.09
  -4   6  -6  761.52   64.29
   4   6   6  864.01   65.79
   4   6   6  723.13   67.39
   6  -6   6 1137.29   96.39
  -6  -6  -6 1399.06   99.89
   6  -6   6 1138.39   96.19
   6  -6   6 1339.57  103.19
   6   6   6 1199.08   97.69
   6   6   6 1210.68   97.59
  -6   6  -6 1211.88   96.39
  -6   6  -6 1215.48  102.49
   6   6   6 1093.19   99.99
   6   6   6 1323.17   96.59
  -8  -6  -6 1072.49   77.69
   8  -6   6  844.02   73.39
   8  -6   6 1065.49   86.99
   8   6   6  813.72   77.59
   8   6   6  892.41   74.89
  -8   6  -6  895.01   72.99
  10  -6   6  232.48   21.30
  10  -6   6  198.68   29.50
 -10   6  -6  236.18   19.90
  10   6   6  244.48   27.10
  12  -6   6   49.20   10.90
  12  -6   6   38.80   13.30
 -12   6  -6   61.19    8.90
  12   6   6   51.79    9.60
  12   6   6   60.49   13.80
  14  -6   6   39.90   14.80
  14  -6   6   59.79   11.80
  14   6   6   36.60   12.70
  14   6   6   73.69   10.30
  16  -6   6  -11.40   10.10
  16  -6   6   -3.60    7.40
  16   6   6  -10.00    4.50
  16   6   6   -1.80   10.50
  18  -6   6    8.50    8.50
  18  -6   6    6.50   11.10
  18   6   6   19.40   13.50
  18   6   6   -3.70    9.00
  20  -6   6  -12.00   11.20
  20  -6   6   11.50   10.40
  20   6   6   -1.90   11.30
 -25  -7   6    3.70    7.30
  25  -7  -6   -2.10   10.70
 -25  -7   6   -5.60    7.70
 -25   7   6    4.90    6.70
  25   7  -6    0.60   12.90
 -23  -7   6  168.98   23.40
 -23  -7   6  185.58   20.60
  23  -7  -6  145.19   22.30
 -23   7   6  161.28   19.80
 -21  -7   6  462.55   40.80
 -21  -7   6  478.15   44.20
  21  -7  -6  422.16   42.20
  21   7  -6  395.76   49.70
 -21   7   6  519.75   42.60
 -19  -7   6  810.62   70.59
 -19  -7   6  786.22   63.39
  19  -7  -6  776.62   64.69
 -19   7   6  773.92   64.29
  19   7  -6  620.94   71.09
  17  -7  -6 1027.10   81.69
 -17  -7   6 1044.50   81.09
 -17   7   6 1014.80   81.89
  17   7  -6  858.91   88.59
  15  -7  -6  404.36   36.00
 -15  -7   6  425.56   39.90
 -15  -7   6  424.06   36.20
  15   7  -6  335.67   43.90
 -15   7   6  427.36   36.80
 -13  -7   6   19.80    6.20
 -13  -7   6   31.20    8.80
  13  -7  -6   34.00    6.80
 -13   7   6   51.79   10.30
  13   7  -6   33.40   14.10
  11  -7  -6   16.20    4.90
 -11  -7   6   17.00    7.30
 -11  -7   6    3.10    4.40
  11   7  -6    7.20   11.20
 -11   7   6    2.10    5.20
  -9  -7   6  193.28   26.80
   9  -7  -6  219.48   21.30
  -9  -7   6  248.38   25.80
  -9  -7   6  257.17   22.20
   9   7  -6  235.18   19.90
  -9   7   6  251.57   22.60
  -9   7   6  209.38   27.90
   9   7  -6  220.48   22.20
  -7  -7   6  998.10   75.69
   7  -7  -6  831.82   71.19
   7  -7  -6  828.32   72.49
  -7  -7   6  756.92   75.79
  -7  -7   6  968.40   71.79
  -7   7   6  864.91   76.89
   7   7  -6  927.91   69.99
   7   7  -6  832.62   71.59
  -7   7   6  963.60   72.39
  -5  -7   6  872.41   67.39
  -5  -7   6  809.32   61.39
   5  -7  -6  682.43   65.39
  -5  -7   6  622.44   64.59
   5  -7  -6  700.53   60.29
   5   7  -6  638.94   64.09
  -5   7   6  742.63   61.19
   5   7  -6  724.03   60.69
  -5   7   6  840.02   71.29
   5   7  -6  825.42   58.99
  -3  -7   6  364.16   37.80
   3  -7  -6  290.17   26.80
   3  -7  -6  268.97   25.50
  -3  -7   6  320.97   26.20
  -3  -7   6  235.88   29.60
   3   7  -6  285.07   25.70
  -3   7   6  290.17   26.50
  -3   7   6  297.77   30.00
   3   7  -6  311.27   23.90
   3   7  -6  261.27   29.70
  -1  -7   6    6.50    2.50
   1  -7  -6    0.80    5.50
  -1  -7   6    4.60    4.10
  -1  -7   6    5.00    5.50
   1  -7  -6   -0.10    3.10
  -1   7   6    3.70    4.30
  -1   7   6   -0.20    5.30
   1   7  -6    6.40    2.70
   1   7  -6    0.70    5.00
   1  -7   6  882.01   72.09
  -1  -7  -6 1036.60   74.29
   1  -7   6  860.31   70.59
   1  -7   6  985.00   77.39
  -1   7  -6  919.61   72.29
  -1   7  -6  854.91   77.29
   1   7   6  809.42   72.39
   1   7   6  750.52   73.89
  -1   7  -6  916.51   70.79
   1   7   6  967.50   74.99
   1   7   6  939.71   72.99
   3  -7   6 1593.44  130.49
   3  -7   6 1764.42  136.29
   3  -7   6 1569.64  129.39
  -3  -7  -6 1950.30  133.29
  -3   7  -6 1644.94  129.59
  -3   7  -6 1694.33  130.69
   3   7   6 1793.72  132.49
   3   7   6 1537.45  130.99
  -3   7  -6 1648.83  137.39
   3   7   6 1424.16  133.09
   3   7   6 1683.63  131.49
   5  -7   6 2228.58  182.58
   5  -7   6 2227.48  183.28
   5  -7   6 2662.63  190.48
   5   7   6 2331.57  184.08
   5   7   6 2083.89  186.68
   5   7   6 2592.04  184.28
   5   7   6 2260.87  184.28
  -5   7  -6 2414.86  183.48
   7  -7   6 1524.55  119.59
   7  -7   6 1616.44  127.49
   7  -7   6 1373.66  119.69
   7   7   6 1537.05  120.59
  -7   7  -6 1573.24  119.89
   7   7   6 1535.25  121.19
   9  -7   6 1328.87  111.79
   9  -7   6 1173.18  104.59
   9   7   6 1280.77  108.89
  -9   7  -6 1336.67  103.19
   9   7   6 1396.66  104.29
   9   7   6 1337.07  105.09
  11  -7   6   17.30    6.00
  11  -7   6   12.70   11.10
 -11   7  -6   10.50    4.40
  11   7   6   18.00    7.70
  11   7   6   21.20    6.10
  11   7   6    6.60   11.00
  13  -7   6   -3.00    9.50
  13  -7   6    2.20    7.70
  13   7   6    5.00    5.20
  13   7   6   -6.40    9.60
 -13   7  -6    2.90    3.50
  15  -7   6   28.90   14.80
  15  -7   6   48.00   12.60
  15   7   6   42.70   15.10
  17  -7   6   53.29   14.50
  17  -7   6   17.80   14.60
  17   7   6   41.70   27.40
  19  -7   6   10.70   10.20
  19  -7   6    8.80   15.10
  19   7   6    5.70   11.70
 -24  -8   6   -0.10    7.60
 -24  -8   6   -2.00    7.50
  24   8  -6    8.10   14.40
 -24   8   6   -0.60    6.50
 -22  -8   6  134.29   17.80
 -22  -8   6  120.19   20.60
  22  -8  -6   88.29   17.10
 -22   8   6  169.98   19.60
 -20  -8   6  353.36   37.30
 -20  -8   6  394.26   35.10
  20  -8  -6  350.26   35.40
  20   8  -6  380.66   53.79
 -20   8   6  415.26   39.30
 -18  -8   6  509.95   45.00
 -18  -8   6  539.15   48.20
  18  -8  -6  516.55   45.20
 -18   8   6  536.15   45.80
  18   8  -6  425.36   52.99
 -16  -8   6  515.75   44.30
  16  -8  -6  517.25   44.20
 -16  -8   6  539.85   47.80
  16   8  -6  442.76   52.79
 -16   8   6  494.55   44.70
 -14  -8   6  563.14   47.20
 -14  -8   6  463.55   43.20
  14  -8  -6  501.35   42.70
 -14   8   6  477.65   43.80
  14   8  -6  476.45   51.99
 -12  -8   6   26.90    9.30
  12  -8  -6   29.00    7.30
 -12  -8   6   33.10    8.30
  12   8  -6   28.30    6.10
 -12   8   6   23.00    7.60
  12   8  -6   23.80   13.30
 -10  -8   6  445.06   40.70
 -10  -8   6  405.66   36.80
  10   8  -6  419.36   35.00
 -10   8   6  420.06   37.40
   8  -8  -6  112.29   14.90
  -8  -8   6  137.39   14.90
  -8  -8   6  132.09   19.00
   8   8  -6  139.39   12.40
   8   8  -6   91.09   16.30
  -8   8   6  131.59   15.20
  -6  -8   6   90.49   15.90
   6  -8  -6   64.09   11.20
  -6  -8   6   73.89   10.50
   6   8  -6   83.39    8.30
  -6   8   6   65.39   10.20
  -6   8   6   59.69   12.80
   6   8  -6   45.50   10.60
  -4  -8   6  233.98   26.00
  -4  -8   6  219.18   21.10
   4  -8  -6  221.38   22.40
  -4   8   6  228.28   21.80
   4   8  -6  213.08   21.10
   4   8  -6  192.78   25.10
   4   8  -6  216.48   18.80
  -4   8   6  224.18   26.10
  -2  -8   6   26.20    6.50
   2  -8  -6   39.70    9.20
  -2  -8   6   25.60    8.40
  -2   8   6   40.90    9.30
   2   8  -6   17.20    6.00
   2   8  -6   35.40    5.30
  -2   8   6   34.30    8.30
   0  -8  -6   60.39   11.50
   0  -8   6   54.89   12.30
   0  -8   6   65.19    7.20
   0  -8   6   68.39    9.60
   0   8  -6   63.19    7.80
   0   8   6   88.09   14.10
   0   8  -6   55.59    8.70
   0   8   6   51.29    9.20
   2  -8   6  787.22   68.39
  -2  -8  -6  882.91   65.59
   2  -8   6  730.73   60.89
  -2   8  -6  813.92   61.39
   2   8   6  716.53   63.09
   2   8   6  831.52   65.09
  -2   8  -6  755.02   62.59
   2   8   6  644.94   64.99
   4  -8   6 1293.97  111.89
   4  -8   6 1381.26  110.79
   4  -8   6 1514.15  118.89
  -4   8  -6 1469.95  111.19
   4   8   6 1408.16  112.79
  -4   8  -6 1425.86  112.09
   4   8   6 1219.18  115.19
   4   8   6 1590.24  113.59
  -6  -8  -6  788.02   58.89
   6  -8   6  538.55   53.79
   6  -8   6  622.34   53.19
   6  -8   6  664.43   62.19
   6   8   6  714.13   54.69
  -6   8  -6  689.33   59.19
   6   8   6  650.83   55.19
   8  -8   6 1129.29   96.19
   8   8   6 1131.99   88.89
  -8   8  -6 1118.89   87.29
   8   8   6  985.20   92.59
  10  -8   6   79.49   18.90
  10  -8   6   95.59   12.30
  10   8   6   89.79   18.90
 -10   8  -6   92.49   12.20
  10   8   6  115.99   14.20
  12  -8   6   -8.90   10.20
 -12   8  -6   -6.20    4.30
  12   8   6    0.60    5.60
  12   8   6   -0.90   10.00
  14  -8   6    6.60   13.10
  14  -8   6   -3.10   14.60
  14   8   6    5.40    5.70
  14   8   6  -10.20   10.40
 -14   8  -6   -4.70    3.90
  16  -8   6   -2.40    8.40
  16  -8   6  -15.90   12.10
  16   8   6    1.60    6.90
  18  -8   6   -4.80   12.80
  18  -8   6   -5.30    8.10
  18   8   6  -20.80   11.20
 -23  -9   6    1.00    8.30
 -23  -9   6   -2.60    7.60
  23  -9  -6   -4.30    8.60
  23   9  -6   -7.60   14.10
 -23   9   6   -1.80    7.60
 -21  -9   6   -1.80    7.00
 -21  -9   6   -2.20    7.40
  21  -9  -6   -0.90    8.00
  21   9  -6  -12.40   10.40
 -21   9   6    2.70    8.60
 -19  -9   6   11.30    7.90
 -19  -9   6   10.10    8.10
  19  -9  -6    1.00    6.90
 -19   9   6   17.10    9.20
  19   9  -6    0.00   11.60
 -17  -9   6   -6.80    6.30
  17  -9  -6    9.10    6.90
 -17  -9   6   -1.20    7.20
 -17   9   6   -9.00    6.10
  17   9  -6  -12.10   12.50
 -15  -9   6   45.30   11.40
  15  -9  -6   51.09   10.10
 -15  -9   6   33.40    8.70
 -15   9   6   51.19   10.50
  15   9  -6   64.69   20.70
  15   9  -6   80.79   10.40
  13  -9  -6   25.20    8.10
 -13  -9   6   19.80    9.50
 -13  -9   6   23.60    8.20
 -13   9   6   21.50    8.40
  13   9  -6   25.20   14.20
  13   9  -6   22.00    7.80
 -11  -9   6  477.25   44.50
 -11  -9   6  455.75   40.50
 -11   9   6  442.76   40.80
  11   9  -6  455.45   38.40
  -9  -9   6  225.08   22.40
  -9  -9   6  232.38   27.10
   9  -9  -6  184.48   23.20
  -9   9   6  234.18   23.00
   9   9  -6  211.38   20.00
  -7  -9   6 1375.16  109.79
  -7  -9   6 1523.75  114.49
   7  -9  -6 1179.28  110.09
   7   9  -6 1414.76  107.99
  -7   9   6 1376.56  110.29
  -5  -9   6  353.56   32.70
   5  -9  -6  343.57   33.80
  -5  -9   6  362.46   37.30
   5   9  -6  390.26   30.70
  -5   9   6  374.86   33.50
  -3  -9   6  820.72   70.39
   3  -9  -6  776.82   66.89
  -3  -9   6  751.52   65.19
   3   9  -6  816.12   63.49
  -3   9   6  826.62   66.09
  -3   9   6  792.12   69.59
  -1  -9   6  263.17   22.30
  -1  -9   6  254.37   30.30
  -1  -9   6  241.48   24.70
   1  -9  -6  277.27   27.50
  -1   9   6  269.87   25.40
   1   9  -6  258.47   22.80
  -1   9   6  266.37   28.60
   1  -9   6   24.90    7.00
  -1  -9  -6   44.90   11.50
   1  -9   6   35.20   11.60
   1  -9   6   37.00    5.90
  -1   9  -6   47.20    7.30
   1   9   6   35.50    8.80
   1   9   6   35.70    8.80
   3  -9   6   53.19    9.50
   3  -9   6   81.59    8.90
   3  -9   6   60.09   14.10
  -3  -9  -6  105.99   18.30
   3   9   6   72.49   11.00
   3   9   6   75.59   15.00
  -3   9  -6   77.09   10.00
  -3   9  -6   64.49   11.30
   3   9   6   83.39   13.50
  -5  -9  -6   -2.50    8.50
   5  -9   6   -4.10    4.90
   5  -9   6   10.10    4.20
   5  -9   6    1.40    9.70
   5   9   6    0.00    4.90
  -5   9  -6    5.70    4.50
  -5   9  -6   -3.50    4.70
   5   9   6    1.50    4.90
   5   9   6    8.10   10.10
   7  -9   6   22.90   12.50
   7   9   6   35.80    6.70
   7   9   6   26.40    7.60
  -7   9  -6   31.40    7.30
   7   9   6   11.70   10.80
   9  -9   6   64.09    9.10
   9  -9   6   35.70   14.50
  -9   9  -6   60.89    9.50
   9   9   6   67.39   10.90
   9   9   6   58.99   15.70
  11  -9   6   20.80   14.00
 -11   9  -6   40.20   12.10
  11   9   6   40.40   15.00
  11   9   6   41.90    9.10
  13  -9   6   33.90   15.20
  13   9   6   32.50   15.50
  13   9   6   66.69   11.80
 -13   9  -6   33.50    7.20
  15  -9   6  -17.00   11.70
  15  -9   6    6.20    9.80
  15   9   6  -11.30   18.30
  15   9   6   11.50    7.30
  17  -9   6   83.89   16.30
  17  -9   6   58.79   20.90
  17   9   6   87.19   15.00
  17   9   6   72.59   19.30
  22 -10  -6   -1.40    8.90
 -22 -10   6   -6.70    7.10
 -22 -10   6   -7.40    7.70
  22  10  -6   -1.20   15.90
 -20 -10   6   42.80   11.60
 -20 -10   6   49.40   12.20
  20 -10  -6   58.89   13.20
  20  10  -6   31.20   17.40
 -20  10   6   44.00   10.80
  18 -10  -6   76.59   13.30
 -18 -10   6   98.29   19.10
 -18 -10   6   67.99   16.60
  18  10  -6   79.79   12.10
  18  10  -6   56.49   21.60
 -18  10   6   66.79   13.70
  16 -10  -6   54.49   10.30
 -16 -10   6   58.19   11.00
 -16 -10   6   66.59   13.70
  16  10  -6   67.99    9.70
 -16  10   6   51.19   10.80
  16  10  -6   29.40   18.40
 -14 -10   6    3.60    7.30
  14 -10  -6    2.40    6.10
 -14 -10   6   -7.30    7.00
  14  10  -6   -0.20    4.30
 -14  10   6   -0.40    7.50
 -12 -10   6  108.39   20.10
 -12 -10   6   97.09   14.50
 -12  10   6   79.59   13.30
  12  10  -6  111.89   14.10
  10 -10  -6  536.25   55.79
 -10 -10   6  665.63   55.29
 -10 -10   6  700.63   59.89
 -10  10   6  644.44   55.79
  10  10  -6  689.93   53.19
   8 -10  -6  879.51   85.59
  -8 -10   6 1115.29   89.89
  -8 -10   6 1050.39   85.19
   8  10  -6 1121.19   83.19
  -6 -10   6 1502.55  124.59
   6 -10  -6 1402.76  125.69
  -6 -10   6 1651.03  129.79
   6  10  -6 1616.04  122.79
  -6  10   6 1637.74  125.49
  -4 -10   6 1791.62  136.69
  -4 -10   6 1596.24  130.89
   4 -10  -6 1478.05  132.19
  -4  10   6 1653.33  131.59
   4  10  -6 1704.13  129.09
  -2 -10   6  450.95   45.30
   2 -10  -6  459.15   41.70
  -2 -10   6  417.96   39.10
   2  10  -6  443.86   37.20
  -2  10   6  456.05   39.90
   0 -10  -6   56.69   12.70
   0 -10   6   47.00   12.80
   0 -10   6   53.89    7.50
   0 -10   6   37.80    8.50
   0  10   6   38.70   10.30
   0  10  -6   46.90    8.00
   0  10   6   50.19   10.30
  -2 -10  -6    0.20    8.30
   2 -10   6    3.20    9.10
   2 -10   6    9.10    6.30
   2 -10   6   12.30    4.30
  -2  10  -6   12.60    5.30
   2  10   6    3.60    5.60
   2  10   6    6.80    6.30
   4 -10   6   62.79    8.20
   4 -10   6   42.20    8.90
   4 -10   6   45.70   13.70
  -4 -10  -6   61.49   13.50
   4  10   6   44.60    9.30
   4  10   6   37.90   12.20
  -4  10  -6   47.70    8.00
   4  10   6   49.99   10.30
   6 -10   6   83.09   19.80
   6 -10   6   93.99   10.80
   6  10   6   73.29   12.60
  -6  10  -6   92.59   11.70
   6  10   6   72.79   11.90
   6  10   6   80.39   18.20
   8 -10   6   26.70    6.00
   8 -10   6    1.20   10.10
   8  10   6   14.20    7.40
   8  10   6   13.20    5.40
   8  10   6    1.50    9.80
  10 -10   6   -8.90   11.40
  10  10   6   11.30   12.20
  10  10   6    3.80   10.40
  12 -10   6   21.20   14.50
 -12  10  -6   15.40    6.60
  12  10   6   48.50   10.90
  12  10   6   23.90   14.60
  14 -10   6  185.38   38.30
  14  10   6  294.97   28.10
 -14  10  -6  268.17   24.80
 -19 -11   6   49.99   13.70
 -19 -11   6   65.29   13.10
  19 -11  -6   71.99   13.90
  19  11  -6   68.59   11.20
 -19  11   6   54.79   12.30
  19  11  -6   61.69   22.20
  17 -11  -6  153.78   20.20
 -17 -11   6  152.28   21.20
 -17 -11   6  196.88   25.60
  17  11  -6  105.79   26.60
 -17  11   6  179.28   21.90
  17  11  -6  163.48   18.40
 -15 -11   6    2.50    8.60
 -15 -11   6   -5.00    7.10
  15 -11  -6    6.40    6.80
 -15  11   6    3.10    8.10
  15  11  -6    5.30    5.70
 -13 -11   6    6.50    9.60
 -13 -11   6   -0.10    6.50
 -13  11   6   -4.40    6.80
  13  11  -6    3.30    5.30
  11 -11  -6  202.98   26.10
 -11 -11   6  233.18   28.70
 -11 -11   6  195.18   23.50
  11  11  -6  217.78   20.80
 -11  11   6  223.78   24.00
   9 -11  -6  706.03   71.99
  -9 -11   6  921.51   76.09
  -9 -11   6  800.22   70.69
  -9  11   6  921.61   71.99
   9  11  -6  895.01   68.79
  -7 -11   6  939.31   82.79
   7 -11  -6  887.11   83.99
  -7 -11   6 1097.19   88.69
  -7  11   6 1021.60   83.59
   7  11  -6 1097.69   81.09
  -5 -11   6  912.01   80.89
  -5 -11   6 1106.29   87.69
   5 -11  -6  846.02   82.19
   5  11  -6 1053.59   79.19
  -5  11   6 1014.40   81.79
  -3 -11   6  808.62   74.49
   3 -11  -6  805.02   78.79
  -3 -11   6  957.00   81.39
   3  11  -6  969.50   72.89
  -3  11   6  973.20   75.59
  -1 -11   6   19.20    7.70
   1 -11  -6   50.49   13.50
  -1 -11   6   15.60   11.00
   1  11  -6   35.40    7.60
  -1  11   6   38.60    9.70
   1 -11   6   -5.70    9.50
  -1 -11  -6    2.00    9.30
   1 -11   6   -1.30    5.50
   1 -11   6    1.50    4.00
   1  11   6   -4.10    5.70
  -1  11  -6   -8.60    4.60
   3 -11   6   36.90   13.80
   3 -11   6   22.80    8.00
   3  11   6   26.00    8.80
   3  11   6   45.20   10.20
  -3  11  -6   55.59    8.60
   5 -11   6  141.39   14.10
  -5  11  -6  121.19   19.40
   5  11   6  147.09   17.50
   5  11   6  100.79   20.40
   7 -11   6   34.00   17.60
   7 -11   6   59.49   10.00
   7  11   6   41.90    8.80
   7  11   6   65.39   16.80
   7  11   6   73.49   12.60
   9 -11   6   -9.80   10.90
   9  11   6   -1.80    4.60
   9  11   6    7.90    6.80
   9  11   6   -8.30    9.60
  11 -11   6   14.00   15.10
  11  11   6    5.60   12.30
  11  11   6   29.10    8.70
  13  11   6  121.99   29.70
  13  11   6  146.89   20.10
 -16 -12   6    4.50   10.00
  16 -12  -6   -6.80    7.40
 -16 -12   6    1.30    8.90
  16  12  -6   -2.40    6.00
 -16  12   6    2.90    9.00
 -14 -12   6    9.80    9.90
 -14 -12   6    8.30    8.00
 -14  12   6    3.20    8.90
  14  12  -6    4.40    6.10
 -12 -12   6   15.50   11.60
 -12 -12   6    2.00    7.40
 -12  12   6   15.10    8.70
  12  12  -6    8.40    5.90
  10 -12  -6  176.88   24.20
 -10 -12   6  188.18   28.40
 -10  12   6  168.08   22.20
  10  12  -6  207.68   19.80
   8 -12  -6  148.89   19.90
  -8 -12   6   84.59   15.50
  -8 -12   6  131.89   24.30
  -8  12   6  113.89   18.00
   8  12  -6  112.69   14.20
   6 -12  -6  141.09   20.00
  -6 -12   6   91.39   15.90
  -6 -12   6  135.69   24.50
   6  12  -6  150.88   15.70
  -6  12   6  122.79   17.90
  -4 -12   6   33.40    9.20
   4 -12  -6   59.29   13.00
  -4 -12   6   52.29   14.50
   4  12  -6   61.59    9.20
  -4  12   6   44.50   11.60
  -2 -12   6    0.80    9.10
  -2 -12   6   -9.90    5.40
   2 -12  -6    2.10    9.50
   2  12  -6   -7.90    4.80
  -2  12   6    0.00    7.10
   0 -12   6   21.50   11.80
   0 -12   6   34.00    9.50
   0  12  -6   61.49    9.30
   0  12   6   49.60   11.30
   2 -12   6   -8.80    4.30
   2 -12   6   -4.90   10.30
   2  12   6   -7.20    6.20
   4 -12   6   54.99    8.30
   4 -12   6   31.90   13.60
   4  12   6   64.89   17.30
  -4  12  -6   59.69    9.70
   6 -12   6   -2.10   12.90
  -6  12  -6   -3.10    5.40
   6  12   6   -1.10    7.10
   8 -12   6   36.00   17.80
   8  12   6   16.60    7.40
   8  12   6   34.90    9.40
   8  12   6   44.00   15.10
  -8  12  -6   31.00    8.60
  10 -12   6   52.99   19.80
  10  12   6   41.20    8.30
  10  12   6   73.99   19.00
  10  12   6   71.79   12.60
 -15 -13   6   61.49   16.00
 -13 -13   6   17.90   12.20
 -13 -13   6    3.30    9.20
  13  13  -6   27.90    8.20
 -13  13   6   25.00   10.10
 -11 -13   6   24.20   12.90
 -11 -13   6   32.70   10.70
  11  13  -6   29.60    8.40
 -11  13   6   16.50    9.60
  -9 -13   6   -8.30   10.00
  -9 -13   6    6.00    8.40
  -9  13   6   -7.00    7.40
   9  13  -6    4.10    6.30
  -7 -13   6  131.49   18.20
  -7 -13   6   88.39   19.00
   7  13  -6  135.29   14.90
  -7  13   6   88.89   14.90
  -5 -13   6    2.10   10.60
  -5 -13   6   11.60    8.30
   5  13  -6   15.20    6.90
  -5  13   6   19.00    9.50
  -3 -13   6   77.49   14.20
  -3 -13   6   99.39   31.00
   3  13  -6  136.49   14.80
  -3  13   6  120.49   18.80
  -1 -13   6   -4.70   10.40
  -1 -13   6   -6.80    9.10
   1  13  -6    1.80    6.00
  -1  13   6   -9.60    6.50
   1 -13   6   -1.00   11.40
   1  13   6   -1.90    7.90
  -1  13  -6    8.90    6.80
   3 -13   6   51.89   16.20
   3  13   6   92.09   14.10
   5 -13   6  202.98   38.20
   5  13   6  324.97   30.40
  -5  13  -6  303.67   27.20
   7 -13   6   96.79   22.80
   7  13   6  104.99   18.50
   7  13   6  173.98   19.90
 -10 -14   6   49.70   12.30
 -10 -14   6   43.40   15.50
 -10  14   6   79.49   15.90
  10  14  -6   62.39   10.90
  -8 -14   6   91.59   20.80
  -8 -14   6   97.89   16.70
  -8  14   6  120.89   18.90
   8  14  -6  148.29   16.20
  -6 -14   6  165.88   24.90
  -6 -14   6  201.88   33.80
  -6  14   6  238.68   26.40
   6  14  -6  242.88   22.60
  -4 -14   6  181.68   31.80
  -4 -14   6  152.48   22.30
   4  14  -6  178.48   19.60
  -4  14   6  198.28   23.80
  -2 -14   6    9.60   13.70
  -2  14   6   29.30   12.10
   2  14  -6   38.00    9.20
   0 -14   6   -7.30   11.90
   0  14  -6   -2.40    6.80
   0  14   6  -18.70    7.20
   2 -14   6   16.20   16.30
  -2  14  -6   44.30    9.60
   2  14   6   25.30   10.80
   4 -14   6  222.18   40.70
  -4  14  -6  324.57   28.90
   4  14   6  325.57   31.60
  28   0  -7   -2.90   11.30
 -28   0   7   -1.40    5.70
  26   0  -7   -8.90   10.60
 -26   0   7   -9.00    5.20
  24   0  -7    5.90   10.70
  22   0  -7    4.60   10.20
 -22   0   7   -9.70    4.30
  20   0  -7   -3.20    7.70
 -18   0   7    2.90    3.90
 -18   0   7   -0.30    5.30
  18   0  -7   -2.80    4.30
  18   0  -7   -1.30    8.30
 -16   0   7  -10.80    4.40
  16   0  -7    1.90    3.50
  16   0  -7   -3.60    6.50
 -16   0   7    1.00    3.70
 -14   0   7   -1.40    4.20
  14   0  -7   -5.40    6.00
  14   0  -7    0.00    3.50
 -14   0   7    0.70    3.40
  12   0  -7    1.90    3.00
 -12   0   7   -2.30    3.10
 -12   0   7    0.10    2.90
 -12   0   7   -3.90    4.00
  12   0  -7    2.00    5.90
  10   0  -7   -1.10    2.60
 -10   0   7    2.00    4.60
 -10   0   7    1.30    2.80
  10   0  -7    1.50    5.90
 -10   0   7   -1.20    2.60
   8   0  -7    0.70    4.70
  -8   0   7    2.40    2.40
   8   0  -7   -1.20    2.40
  -8   0   7    0.00    4.20
  -8   0   7    1.60    2.90
  -6   0   7   -0.30    1.70
  -6   0   7   -4.10    2.10
  -6   0   7   -2.80    3.00
   6   0  -7    2.70    2.00
  -4   0   7    2.20    2.50
   4   0  -7    1.30    1.60
  -4   0   7    0.70    1.60
  -2   0   7    3.50    1.90
  -2   0   7   -2.00    1.90
   0   0   7    2.30    2.70
   0   0   7    3.80    3.50
   0   0   7    2.30    2.00
   2   0   7   -3.40    2.30
   2   0   7    1.70    3.50
   2   0   7    1.60    3.50
   4   0   7    0.40    3.10
   4   0   7   -2.80    2.10
   4   0   7    3.40    3.80
   6   0   7   -0.90    1.90
   6   0   7    0.10    4.00
   6   0   7    0.10    2.80
   8   0   7   -1.30    3.50
   8   0   7   -2.80    4.70
  10   0   7   -4.70    5.50
  10   0   7    3.40    4.50
  12   0   7    0.00    4.80
  12   0   7   -4.80    5.90
  14   0   7    4.50    5.60
  14   0   7   -3.10    6.20
  16   0   7   -5.70    6.80
  18   0   7   -4.80    9.90
  20   0   7   -5.00   11.50
  29  -1  -7   10.30   15.70
 -29  -1   7   -9.50    5.60
  29   1  -7   11.10   15.10
 -29   1   7   -4.10    6.40
 -27  -1   7    0.60    5.90
  27  -1  -7   -1.30   11.70
 -27   1   7   -1.50    5.60
  25  -1  -7  114.09   22.50
 -25  -1   7  169.58   17.10
  25   1  -7  111.69   23.10
 -25   1   7  135.59   16.70
 -23  -1   7  374.36   30.60
  23  -1  -7  306.87   35.80
 -23   1   7  355.96   30.50
  23   1  -7  268.37   36.00
 -21  -1   7  194.88   18.40
  21  -1  -7  149.99   23.00
  21   1  -7  178.98   25.70
 -21   1   7  174.58   19.40
  19  -1  -7   37.40   12.50
 -19  -1   7   38.10   10.20
 -19   1   7   32.90   13.60
  19   1  -7   18.40   11.20
 -19   1   7   48.20    8.00
 -19   1   7   49.10    9.70
 -17  -1   7    1.90    6.30
 -17  -1   7    4.50    4.20
  17  -1  -7    2.80    6.70
  17  -1  -7    0.80    4.40
 -17   1   7   10.00    6.10
  17   1  -7    6.40    4.00
 -17   1   7    6.80    4.40
  17   1  -7    5.90    8.20
  15  -1  -7  971.10   80.59
 -15  -1   7 1057.99   78.89
  15   1  -7  851.41   78.59
  15   1  -7  888.71   81.79
 -15   1   7 1128.19   79.69
 -15   1   7  963.70   78.89
  15   1  -7  936.81   77.99
 -15   1   7 1057.49   78.69
 -13  -1   7 1763.32  122.99
  13  -1  -7 1519.45  120.19
  13  -1  -7 1434.16  121.79
 -13  -1   7 1543.35  120.69
 -13   1   7 1760.92  121.19
 -13   1   7 1461.45  120.79
 -13   1   7 1661.33  120.39
  13   1  -7 1307.27  120.49
  13   1  -7 1471.55  119.79
  13   1  -7 1398.56  123.29
 -11  -1   7 2578.34  193.68
  11  -1  -7 2406.76  194.38
  11  -1  -7 2510.65  192.98
 -11  -1   7 2799.42  195.48
 -11   1   7 2355.86  193.78
  11   1  -7 2508.15  192.58
 -11   1   7 2627.14  193.08
  11   1  -7 2396.36  196.08
  11   1  -7 2164.18  193.48
  -9  -1   7 1393.26  101.89
  -9  -1   7 1324.27  103.09
  -9  -1   7 1298.07  104.39
   9  -1  -7 1221.58  103.39
   9  -1  -7 1331.87  102.29
  -9   1   7 1266.37  103.39
  -9   1   7 1377.56  102.39
   9   1  -7 1412.86  101.99
   9   1  -7 1202.98  104.99
   9   1  -7 1217.18  103.09
  -7  -1   7  380.16   35.20
  -7  -1   7  422.36   32.60
  -7  -1   7  428.16   34.10
   7  -1  -7  415.16   33.00
   7   1  -7  370.86   33.90
  -7   1   7  406.56   33.10
   7   1  -7  404.06   32.50
  -7   1   7  447.46   33.40
  -7   1   7  392.66   34.30
   5  -1  -7  114.09    9.30
  -5  -1   7   96.19   10.30
  -5  -1   7   97.89    8.70
   5   1  -7  109.99    8.60
   5   1  -7   86.69   10.00
  -5   1   7   81.89   10.30
  -5   1   7  106.19    9.30
  -5   1   7   75.69    9.50
  -3  -1   7  152.88   15.10
  -3  -1   7  181.68   14.10
   3  -1  -7  174.58   14.50
   3   1  -7  145.09   15.00
  -3   1   7  175.18   14.50
  -1  -1   7 1493.25  128.89
  -1  -1   7 1729.13  125.59
  -1  -1   7 1588.74  126.49
  -1   1   7 1759.12  126.19
  -1   1   7 1734.13  126.29
   1   1  -7 1408.56  126.29
   1  -1   7 1529.95  125.39
   1  -1   7 1532.25  122.89
   1   1   7 1618.64  122.99
   1   1   7 1625.24  123.39
   3  -1   7  749.92   57.89
   3  -1   7  747.73   60.39
   3   1   7  765.12   59.09
   3   1   7  668.13   59.49
   5  -1   7   30.30    6.20
   5  -1   7   20.80    6.10
   5  -1   7   34.10    4.80
  -5   1  -7   20.80    5.60
   5   1   7   34.70    6.60
   5   1   7   31.00    6.90
   7  -1   7   12.10    2.30
   7  -1   7   12.60    5.00
   7  -1   7   13.40    4.90
  -7   1  -7   10.00    4.40
   7   1   7   19.10    4.20
   7   1   7    7.70    5.00
   9  -1   7  234.18   22.50
   9  -1   7  218.38   22.40
   9   1   7  212.88   18.20
  -9   1  -7  187.08   21.40
   9   1   7  243.98   20.50
   9   1   7  211.48   23.00
  11  -1   7  297.27   27.80
  11  -1   7  299.87   27.90
  11   1   7  283.77   28.10
 -11   1  -7  239.88   25.90
  11   1   7  270.17   24.80
  13  -1   7  480.35   43.90
  13  -1   7  504.35   44.80
 -13   1  -7  465.75   42.70
  13   1   7  516.05   45.40
  15  -1   7  179.38   23.90
  15  -1   7  251.47   26.10
 -15   1  -7  202.28   22.40
  15   1   7  229.28   26.20
  17  -1   7   16.80    9.10
  17  -1   7   40.30   13.30
 -17   1  -7   21.70    7.60
  17   1   7   42.70   14.50
  19  -1   7   25.50   13.20
 -19   1  -7   10.60    6.40
  19   1   7    1.30   10.50
  21  -1   7   -3.90   11.50
  21   1   7    5.40   12.60
 -21   1  -7   -5.30    6.70
 -28  -2   7   14.70    7.70
  28   2  -7   21.60   14.60
 -28   2   7   29.70    7.80
 -26  -2   7   79.59   11.70
  26  -2  -7   95.09   18.90
  26   2  -7   62.69   18.80
 -26   2   7   79.79   11.40
  24  -2  -7  201.58   27.30
 -24  -2   7  214.38   21.20
  24   2  -7  177.28   28.90
 -24   2   7  217.68   21.50
  22  -2  -7  420.96   43.30
 -22  -2   7  507.65   39.40
 -22   2   7  456.05   39.20
  22   2  -7  401.86   45.70
 -20  -2   7  275.27   24.50
  20  -2  -7  262.17   28.40
 -20   2   7  282.17   26.10
  20   2  -7  244.78   31.30
  20   2  -7  230.78   24.40
 -18  -2   7    5.70    7.50
 -18  -2   7    1.50    7.40
  18  -2  -7    0.80    7.10
  18   2  -7   -4.70    8.10
 -18   2   7    6.60    4.80
  18   2  -7    2.00    4.00
 -18   2   7   -5.10    9.90
  18   2  -7   -2.60    3.20
 -18   2   7    3.40    5.00
  16  -2  -7  403.16   35.50
  16  -2  -7  395.66   37.30
 -16  -2   7  471.85   36.00
 -16  -2   7  487.45   39.90
 -16   2   7  371.56   35.80
  16   2  -7  370.96   40.30
  16   2  -7  434.46   35.10
  16   2  -7  395.86   39.90
 -16   2   7  366.56   43.10
 -16   2   7  453.45   36.10
 -16   2   7  436.46   35.90
  14  -2  -7 1296.47  105.99
 -14  -2   7 1521.85  108.59
  14  -2  -7 1384.96  106.39
 -14  -2   7 1452.75  105.49
  14   2  -7 1290.47  104.39
 -14   2   7 1266.57  105.59
 -14   2   7 1427.56  105.19
  14   2  -7 1156.68  105.19
  14   2  -7 1187.08  108.79
 -14   2   7 1315.97  105.09
 -12  -2   7 4282.47  316.87
 -12  -2   7 4400.46  319.47
  12  -2  -7 4030.60  317.07
  12  -2  -7 3942.81  316.27
 -12   2   7 3913.01  317.17
  12   2  -7 4222.88  315.87
 -12   2   7 4201.08  316.47
  12   2  -7 3842.22  320.07
 -12   2   7 4453.15  316.27
  12   2  -7 3542.45  316.67
  10  -2  -7 3334.17  255.87
 -10  -2   7 3477.05  256.07
  10  -2  -7 3261.37  255.37
 -10  -2   7 3261.97  257.97
 -10   2   7 3432.36  255.57
 -10   2   7 3556.64  254.87
  10   2  -7 3066.09  258.77
  10   2  -7 3241.78  254.67
  10   2  -7 2999.50  255.87
  -8  -2   7 1650.83  121.29
   8  -2  -7 1557.04  120.59
  -8  -2   7 1485.25  123.19
   8   2  -7 1430.76  121.19
   8   2  -7 1408.16  123.49
   8   2  -7 1621.14  119.79
  -8   2   7 1630.94  120.69
   6  -2  -7   45.70    5.90
  -6  -2   7   43.90    6.60
  -6  -2   7   29.50    7.70
   6   2  -7   36.80    6.40
  -6   2   7   48.50    6.30
   6   2  -7   46.20    4.50
   4  -2  -7  257.97   20.80
  -4  -2   7  254.37   21.30
  -4  -2   7  224.98   24.10
  -4   2   7  284.37   21.10
   4   2  -7  204.68   21.00
  -2  -2   7 1266.57   94.59
   2  -2  -7 1291.47   94.39
  -2  -2   7 1124.19   97.19
  -2   2   7 1269.37   94.39
   2   2  -7 1063.49   94.39
   0  -2   7 1921.41  153.08
   0  -2   7 2001.40  150.28
   0   2  -7 1748.93  150.28
   0   2   7 2016.20  150.48
   0   2   7 1968.10  150.18
   2  -2   7 1112.79   84.49
   2  -2   7 1073.69   81.19
   2   2   7 1039.10   81.99
  -2   2  -7  944.11   81.29
   2   2   7 1009.50   81.69
   4  -2   7  554.84   43.10
   4  -2   7  606.44   46.90
   4   2   7  596.14   45.30
  -4   2  -7  453.95   46.10
   4   2   7  512.05   44.70
   6  -2   7   19.50    5.90
  -6  -2  -7   28.20    6.80
   6  -2   7   24.00    6.20
   6   2   7   35.10    5.90
  -6   2  -7   15.80    5.40
[truncated: 362,432 more chars]
