# Supplementary material
Source: publisher figshare collection journal article supplement (https://acs.figshare.com/ndownloader/files/22494656)
Supplement: Supplementary file 1 [file 22494656 › CIF/1Y.cif]

data_1y
_audit_creation_date               2019-05-24
_audit_creation_method
;
Olex2 1.2
(compiled 2018.05.29 svn.r3508 for OlexSys, GUI svn.r5506)
;
_shelx_SHELXL_version_number       '2016/6'
_audit_contact_author_address      ?
_audit_contact_author_email        ?
_audit_contact_author_name         ''
_audit_contact_author_phone        ?
_publ_contact_author_id_orcid      ?
_publ_section_references
;
Dolomanov, O.V., Bourhis, L.J., Gildea, R.J, Howard, J.A.K. & Puschmann, H.
 (2009), J. Appl. Cryst. 42, 339-341.

Sheldrick, G.M. (2008). Acta Cryst. A64, 112-122.
;
_chemical_name_common              ?
_chemical_name_systematic          ?
_chemical_formula_moiety           'C44 H34 Cu2 I2 N6 O2, C2 H3 N, C10 H8'
_chemical_formula_sum              'C56 H45 Cu2 I2 N7 O2'
_chemical_formula_weight           1228.87
_chemical_melting_point            ?
loop_
  _atom_type_symbol
  _atom_type_description
  _atom_type_scat_dispersion_real
  _atom_type_scat_dispersion_imag
  _atom_type_scat_source
 'C' 'C' 0.0033 0.0016 'International Tables Vol C Tables 4.2.6.8 and 6.1.1.4'
 'H' 'H' 0.0000 0.0000 'International Tables Vol C Tables 4.2.6.8 and 6.1.1.4'
 'Cu' 'Cu' 0.3201 1.2651 'International Tables Vol C Tables 4.2.6.8 and 6.1.1.4'
 'I' 'I' -0.4742 1.8119 'International Tables Vol C Tables 4.2.6.8 and 6.1.1.4'
 'N' 'N' 0.0061 0.0033 'International Tables Vol C Tables 4.2.6.8 and 6.1.1.4'
 'O' 'O' 0.0106 0.0060 'International Tables Vol C Tables 4.2.6.8 and 6.1.1.4'

_shelx_space_group_comment
;
The symmetry employed for this shelxl refinement is uniquely defined
by the following loop, which should always be used as a source of
symmetry information in preference to the above space-group names.
They are only intended as comments.
;
_space_group_crystal_system        'monoclinic'
_space_group_IT_number             14
_space_group_name_H-M_alt          'P 1 21/c 1'
_space_group_name_Hall             '-P 2ybc'
loop_
  _space_group_symop_operation_xyz
 'x, y, z'
 '-x, y+1/2, -z+1/2'
 '-x, -y, -z'
 'x, -y-1/2, z-1/2'

_cell_length_a                     23.5760(19)
_cell_length_b                     12.8738(11)
_cell_length_c                     17.7114(14)
_cell_angle_alpha                  90
_cell_angle_beta                   110.880(2)
_cell_angle_gamma                  90
_cell_volume                       5022.6(7)
_cell_formula_units_Z              4
_cell_measurement_reflns_used      9089
_cell_measurement_temperature      100(2)
_cell_measurement_theta_max        25.35
_cell_measurement_theta_min        2.43
_shelx_estimated_absorpt_T_max     ?
_shelx_estimated_absorpt_T_min     ?
_exptl_absorpt_coefficient_mu      2.126
_exptl_absorpt_correction_T_max    0.7452
_exptl_absorpt_correction_T_min    0.5712
_exptl_absorpt_correction_type     multi-scan
_exptl_absorpt_process_details    
 'SADABS-2016/2 (Bruker,2016/2) was used for absorption correction. wR2(int) was 0.1214 before and 0.0674 after correction. The Ratio of minimum to maximum transmission is 0.7665. The \l/2 correction factor is Not present.'
_exptl_absorpt_special_details     ?
_exptl_crystal_colour              'dark light brown'
_exptl_crystal_colour_lustre       dark
_exptl_crystal_colour_modifier     light
_exptl_crystal_colour_primary      brown
_exptl_crystal_density_diffrn      1.625
_exptl_crystal_density_meas        ?
_exptl_crystal_density_method      ?
_exptl_crystal_description         block
_exptl_crystal_F_000               2440
_exptl_crystal_size_max            0.26
_exptl_crystal_size_mid            0.25
_exptl_crystal_size_min            0.21
_exptl_transmission_factor_max     ?
_exptl_transmission_factor_min     ?
_diffrn_reflns_av_R_equivalents    0.0566
_diffrn_reflns_av_unetI/netI       0.0447
_diffrn_reflns_Laue_measured_fraction_full  0.997
_diffrn_reflns_Laue_measured_fraction_max  0.996
_diffrn_reflns_limit_h_max         28
_diffrn_reflns_limit_h_min         -25
_diffrn_reflns_limit_k_max         15
_diffrn_reflns_limit_k_min         -15
_diffrn_reflns_limit_l_max         21
_diffrn_reflns_limit_l_min         -21
_diffrn_reflns_number              50502
_diffrn_reflns_point_group_measured_fraction_full  0.997
_diffrn_reflns_point_group_measured_fraction_max  0.996
_diffrn_reflns_theta_full          25.242
_diffrn_reflns_theta_max           25.371
_diffrn_reflns_theta_min           2.300
_diffrn_ambient_temperature        100.03
_diffrn_detector_area_resol_mean   ?
_diffrn_measured_fraction_theta_full  0.997
_diffrn_measured_fraction_theta_max  0.996
_diffrn_measurement_device_type    'Bruker APEX-II CCD'
_diffrn_measurement_method         '\f and \w scans'
_diffrn_radiation_type             MoK\a
_diffrn_radiation_wavelength       0.71073
_diffrn_source                     ?
_reflns_Friedel_coverage           0.000
_reflns_Friedel_fraction_full      .
_reflns_Friedel_fraction_max       .
_reflns_number_gt                  6320
_reflns_number_total               9191
_reflns_special_details
;
 Reflections were merged by SHELXL according to the crystal
 class for the calculation of statistics and refinement.
 
 _reflns_Friedel_fraction is defined as the number of unique
 Friedel pairs measured divided by the number that would be
 possible theoretically, ignoring centric projections and
 systematic absences.
;
_reflns_threshold_expression       'I > 2\s(I)'
_computing_cell_refinement         'SAINT V8.38A (?, 2016)'
_computing_data_collection         ?
_computing_data_reduction          'SAINT V8.38A (?, 2016)'
_computing_molecular_graphics      'Olex2 (Dolomanov et al., 2009)'
_computing_publication_material    'Olex2 (Dolomanov et al., 2009)'
_computing_structure_refinement    'XL (Sheldrick, 2008)'
_computing_structure_solution      'ShelXS (Sheldrick, 2008)'
_refine_diff_density_max           2.160
_refine_diff_density_min           -1.682
_refine_diff_density_rms           0.208
_refine_ls_extinction_coef         .
_refine_ls_extinction_method       none
_refine_ls_goodness_of_fit_ref     1.091
_refine_ls_hydrogen_treatment      constr
_refine_ls_matrix_type             full
_refine_ls_number_parameters       625
_refine_ls_number_reflns           9191
_refine_ls_number_restraints       0
_refine_ls_R_factor_all            0.1322
_refine_ls_R_factor_gt             0.0817
_refine_ls_restrained_S_all        1.091
_refine_ls_shift/su_max            0.002
_refine_ls_shift/su_mean           0.000
_refine_ls_structure_factor_coef   Fsqd
_refine_ls_weighting_details      
 'w=1/[\s^2^(Fo^2^)+(0.0001P)^2^+165.3777P] where P=(Fo^2^+2Fc^2^)/3'
_refine_ls_weighting_scheme        calc
_refine_ls_wR_factor_gt            0.1677
_refine_ls_wR_factor_ref           0.2034
_refine_special_details            ?
_olex2_refinement_description
;
1. Fixed Uiso
 At 1.2 times of:
  All C(H) groups
 At 1.5 times of:
  All C(H,H,H) groups
2.a Aromatic/amide H refined with riding coordinates:
 C22(H22), C1(H1), C12(H12), C9(H9), C28(H28), C23(H23), C7(H7), C13(H13),
 C30(H30), C2(H2), C38(H38), C15(H15), C35(H35), C36(H36), C25(H25), C14(H14),
 C5(H5), C26(H26), C20(H20), C01A(H01A), C34(H34), C17(H17), C42(H42), C4(H4),
 C39(H39), C18(H18), C41(H41), C33(H33), C46(H46), C48(H48), C51(H51), C45(H45),
  C49(H49), C44(H44), C50(H50), C01X(H01X)
2.b Idealised Me refined as rotating group:
 C21(H21A,H21B,H21C), C43(H43A,H43B,H43C), C53(H53A,H53B,H53C)
;
_atom_sites_solution_hydrogens     geom
_atom_sites_solution_primary       direct
_atom_sites_solution_secondary     ?
loop_
  _atom_site_label
  _atom_site_type_symbol
  _atom_site_fract_x
  _atom_site_fract_y
  _atom_site_fract_z
  _atom_site_U_iso_or_equiv
  _atom_site_adp_type
  _atom_site_occupancy
  _atom_site_site_symmetry_order
  _atom_site_calc_flag
  _atom_site_refinement_flags_posn
  _atom_site_refinement_flags_adp
  _atom_site_refinement_flags_occupancy
  _atom_site_disorder_assembly
  _atom_site_disorder_group
 I2 I 1.29092(4) 0.89486(6) 0.34455(5) 0.0367(2) Uani 1 1 d . . . . .
 I1 I 0.80065(4) 0.11697(6) 0.31512(5) 0.0382(2) Uani 1 1 d . . . . .
 Cu2 Cu 0.74716(6) 0.30070(11) 0.29938(9) 0.0327(3) Uani 1 1 d . . . . .
 Cu1 Cu 1.24947(6) 0.70298(11) 0.33033(9) 0.0338(3) Uani 1 1 d . . . . .
 O1 O 0.9346(4) 1.1216(7) 0.7243(5) 0.044(2) Uani 1 1 d . . . . .
 N6 N 1.1820(4) 0.7011(7) 0.3766(6) 0.034(2) Uani 1 1 d . . . . .
 N2 N 0.3230(4) 0.6086(7) 0.3830(6) 0.034(2) Uani 1 1 d . . . . .
 N4 N 0.8135(4) 0.3979(8) 0.3631(5) 0.033(2) Uani 1 1 d . . . . .
 N3 N 0.6771(4) 0.2951(8) 0.3398(6) 0.035(2) Uani 1 1 d . . . . .
 O2 O 0.4744(5) -0.1202(7) 0.7382(6) 0.052(2) Uani 1 1 d . . . . .
 N5 N 0.9928(4) 0.6388(7) 0.4386(6) 0.034(2) Uani 1 1 d . . . . .
 N1 N 0.4993(4) 0.3644(8) 0.4276(6) 0.034(2) Uani 1 1 d . . . . .
 C8 C 0.9751(5) 0.8008(9) 0.5313(6) 0.029(2) Uani 1 1 d . . . . .
 C22 C 0.6802(5) 0.2260(9) 0.3982(6) 0.031(3) Uani 1 1 d . . . . .
 H22 H 0.713232 0.178504 0.414980 0.037 Uiso 1 1 calc R . . . .
 C24 C 0.5873(5) 0.2898(9) 0.4098(7) 0.029(2) Uani 1 1 d . . . . .
 C1 C 0.8158(5) 0.4521(9) 0.4293(7) 0.032(3) Uani 1 1 d . . . . .
 H1 H 0.787234 0.435156 0.454070 0.038 Uiso 1 1 calc R . . . .
 C12 C 1.1341(5) 0.7789(9) 0.4619(7) 0.032(3) Uani 1 1 d . . . . .
 H12 H 1.135477 0.829265 0.501764 0.038 Uiso 1 1 calc R . . . .
 C11 C 1.0849(5) 0.7120(9) 0.4324(7) 0.031(2) Uani 1 1 d . . . . .
 C9 C 1.0248(5) 0.8000(9) 0.5054(7) 0.032(3) Uani 1 1 d . . . . .
 H9 H 1.052568 0.856397 0.518065 0.039 Uiso 1 1 calc R . . . .
 C28 C 0.5349(5) 0.2007(9) 0.4915(7) 0.030(2) Uani 1 1 d . . . . .
 H28 H 0.562841 0.144837 0.500269 0.036 Uiso 1 1 calc R . . . .
 C29 C 0.4886(5) 0.1980(9) 0.5253(7) 0.031(3) Uani 1 1 d . . . . .
 C27 C 0.5387(5) 0.2851(9) 0.4460(7) 0.033(3) Uani 1 1 d . . . . .
 C23 C 0.6370(5) 0.2215(10) 0.4348(7) 0.037(3) Uani 1 1 d . . . . .
 H23 H 0.641068 0.172584 0.476589 0.044 Uiso 1 1 calc R . . . .
 C7 C 0.9354(5) 0.7177(9) 0.5098(6) 0.030(2) Uani 1 1 d . . . . .
 H7 H 0.901693 0.714653 0.527261 0.036 Uiso 1 1 calc R . . . .
 C13 C 1.1809(5) 0.7713(10) 0.4324(7) 0.037(3) Uani 1 1 d . . . . .
 H13 H 1.214108 0.818027 0.452668 0.044 Uiso 1 1 calc R . . . .
 C10 C 1.0329(5) 0.7176(9) 0.4617(7) 0.031(2) Uani 1 1 d . . . . .
 C30 C 0.4484(5) 0.2813(9) 0.5063(7) 0.032(3) Uani 1 1 d . . . . .
 H30 H 0.416437 0.282733 0.527154 0.038 Uiso 1 1 calc R . . . .
 C3 C 0.9007(5) 0.5533(9) 0.4317(6) 0.030(3) Uani 1 1 d . . . . .
 C37 C 0.4846(5) 0.1108(9) 0.5777(7) 0.031(2) Uani 1 1 d . . . . .
 C2 C 0.8565(5) 0.5297(9) 0.4633(7) 0.034(3) Uani 1 1 d . . . . .
 H2 H 0.854377 0.567199 0.508367 0.041 Uiso 1 1 calc R . . . .
 C38 C 0.5327(6) 0.0452(10) 0.6138(7) 0.037(3) Uani 1 1 d . . . . .
 H38 H 0.568480 0.053832 0.601474 0.045 Uiso 1 1 calc R . . . .
 C6 C 0.9450(5) 0.6398(9) 0.4630(6) 0.029(2) Uani 1 1 d . . . . .
 C32 C 0.4104(5) 0.4497(9) 0.4351(6) 0.029(2) Uani 1 1 d . . . . .
 C15 C 1.0868(6) 0.6383(9) 0.3761(8) 0.037(3) Uani 1 1 d . . . . .
 H15 H 1.054189 0.590646 0.354720 0.045 Uiso 1 1 calc R . . . .
 C35 C 0.3696(5) 0.6022(10) 0.3575(7) 0.035(3) Uani 1 1 d . . . . .
 H35 H 0.373170 0.654148 0.321394 0.042 Uiso 1 1 calc R . . . .
 C36 C 0.4132(5) 0.5247(10) 0.3804(7) 0.038(3) Uani 1 1 d . . . . .
 H36 H 0.444737 0.522926 0.358782 0.046 Uiso 1 1 calc R . . . .
 C16 C 0.9659(5) 0.8881(9) 0.5830(7) 0.033(3) Uani 1 1 d . . . . .
 C25 C 0.5843(5) 0.3602(9) 0.3487(7) 0.036(3) Uani 1 1 d . . . . .
 H25 H 0.551310 0.407502 0.329190 0.043 Uiso 1 1 calc R . . . .
 C19 C 0.9479(6) 1.0455(9) 0.6793(7) 0.038(3) Uani 1 1 d . . . . .
 C14 C 1.1357(6) 0.6344(9) 0.3515(8) 0.039(3) Uani 1 1 d . . . . .
 H14 H 1.136659 0.581373 0.314651 0.047 Uiso 1 1 calc R . . . .
 C31 C 0.4539(5) 0.3617(9) 0.4580(7) 0.031(3) Uani 1 1 d . . . . .
 C40 C 0.4803(6) -0.0470(9) 0.6853(7) 0.038(3) Uani 1 1 d . . . . .
 C5 C 0.8581(5) 0.4209(11) 0.3354(8) 0.046(3) Uani 1 1 d . . . . .
 H5 H 0.859143 0.383757 0.289550 0.055 Uiso 1 1 calc R . . . .
 C26 C 0.6300(6) 0.3601(10) 0.3171(8) 0.040(3) Uani 1 1 d . . . . .
 H26 H 0.627792 0.409709 0.276450 0.049 Uiso 1 1 calc R . . . .
 C20 C 1.0050(6) 1.0247(9) 0.6820(7) 0.035(3) Uani 1 1 d . . . . .
 H20 H 1.038578 1.062672 0.717239 0.042 Uiso 1 1 calc R . . . .
 C01A C 1.0142(6) 0.9455(9) 0.6313(8) 0.039(3) Uani 1 1 d . . . . .
 H01A H 1.053743 0.932427 0.631082 0.047 Uiso 1 1 calc R . . . .
 C34 C 0.3224(6) 0.5386(11) 0.4386(8) 0.051(4) Uani 1 1 d . . . . .
 H34 H 0.290869 0.542513 0.460061 0.062 Uiso 1 1 calc R . . . .
 C17 C 0.9074(6) 0.9116(10) 0.5820(8) 0.039(3) Uani 1 1 d . . . . .
 H17 H 0.873600 0.873538 0.547384 0.046 Uiso 1 1 calc R . . . .
 C42 C 0.4313(6) 0.0929(10) 0.5944(8) 0.040(3) Uani 1 1 d . . . . .
 H42 H 0.396077 0.133840 0.568965 0.048 Uiso 1 1 calc R . . . .
 C4 C 0.9023(6) 0.4942(12) 0.3684(7) 0.048(4) Uani 1 1 d . . . . .
 H4 H 0.933775 0.503697 0.347372 0.057 Uiso 1 1 calc R . . . .
 C39 C 0.5316(6) -0.0319(10) 0.6665(8) 0.042(3) Uani 1 1 d . . . . .
 H39 H 0.566149 -0.074928 0.690152 0.050 Uiso 1 1 calc R . . . .
 C18 C 0.8984(6) 0.9889(10) 0.6303(8) 0.043(3) Uani 1 1 d . . . . .
 H18 H 0.858779 1.003193 0.630140 0.051 Uiso 1 1 calc R . . . .
 N7 N 0.1490(8) 0.3575(13) 0.3432(9) 0.083(5) Uani 1 1 d . . . . .
 C41 C 0.4304(6) 0.0150(10) 0.6484(8) 0.046(3) Uani 1 1 d . . . . .
 H41 H 0.394535 0.004268 0.660072 0.056 Uiso 1 1 calc R . . . .
 C33 C 0.3652(6) 0.4610(11) 0.4663(8) 0.050(4) Uani 1 1 d . . . . .
 H33 H 0.363300 0.414998 0.507291 0.060 Uiso 1 1 calc R . . . .
 C46 C 0.2765(7) 0.0885(14) 0.5880(10) 0.064(4) Uani 1 1 d . . . . .
 H46 H 0.278804 0.018197 0.605146 0.077 Uiso 1 1 calc R . . . .
 C21 C 0.9829(7) 1.1838(12) 0.7751(9) 0.058(4) Uani 1 1 d . . . . .
 H21A H 1.014039 1.138930 0.812182 0.087 Uiso 1 1 calc GR . . . .
 H21B H 0.967280 1.231390 0.806300 0.087 Uiso 1 1 calc GR . . . .
 H21C H 1.000559 1.223838 0.741957 0.087 Uiso 1 1 calc GR . . . .
 C48 C 0.3035(8) 0.1483(14) 0.7305(10) 0.071(5) Uani 1 1 d . . . . .
 H48 H 0.306108 0.078194 0.748217 0.086 Uiso 1 1 calc R . . . .
 C47 C 0.2882(7) 0.1699(12) 0.6473(10) 0.055(4) Uani 1 1 d . . . . .
 C43 C 0.5236(7) -0.1884(12) 0.7734(8) 0.059(4) Uani 1 1 d . . . . .
 H43A H 0.531819 -0.227039 0.730712 0.088 Uiso 1 1 calc GR . . . .
 H43B H 0.513439 -0.237235 0.809093 0.088 Uiso 1 1 calc GR . . . .
 H43C H 0.559627 -0.148362 0.804713 0.088 Uiso 1 1 calc GR . . . .
 C54 C 0.1501(7) 0.3317(15) 0.2829(11) 0.070(5) Uani 1 1 d . . . . .
 C51 C 0.2953(9) 0.3549(13) 0.6827(18) 0.098(8) Uani 1 1 d . . . . .
 H51 H 0.292874 0.426298 0.668428 0.117 Uiso 1 1 calc R . . . .
 C52 C 0.2840(7) 0.2739(13) 0.6207(15) 0.080(6) Uani 1 1 d . . . . .
 C45 C 0.2624(8) 0.109(2) 0.5086(12) 0.094(7) Uani 1 1 d . . . . .
 H45 H 0.254424 0.053821 0.471005 0.113 Uiso 1 1 calc R . . . .
 C49 C 0.3146(9) 0.2269(16) 0.7858(14) 0.100(8) Uani 1 1 d . . . . .
 H49 H 0.325898 0.210590 0.841588 0.120 Uiso 1 1 calc R . . . .
 C44 C 0.2595(9) 0.213(3) 0.4808(14) 0.128(13) Uani 1 1 d . . . . .
 H44 H 0.251943 0.227940 0.425658 0.154 Uiso 1 1 calc R . . . .
 C50 C 0.3098(9) 0.3248(18) 0.7631(16) 0.098(7) Uani 1 1 d . . . . .
 H50 H 0.316466 0.377186 0.803070 0.118 Uiso 1 1 calc R . . . .
 C53 C 0.1474(9) 0.3017(17) 0.2018(12) 0.092(7) Uani 1 1 d . . . . .
 H53A H 0.158499 0.228354 0.201899 0.138 Uiso 1 1 calc GR . . . .
 H53B H 0.175784 0.344516 0.186163 0.138 Uiso 1 1 calc GR . . . .
 H53C H 0.106083 0.312274 0.163113 0.138 Uiso 1 1 calc GR . . . .
 C01X C 0.2681(10) 0.291(2) 0.5384(19) 0.123(12) Uani 1 1 d . . . . .
 H01X H 0.262795 0.361180 0.519959 0.147 Uiso 1 1 calc R . . . .

loop_
  _atom_site_aniso_label
  _atom_site_aniso_U_11
  _atom_site_aniso_U_22
  _atom_site_aniso_U_33
  _atom_site_aniso_U_23
  _atom_site_aniso_U_13
  _atom_site_aniso_U_12
 I2 0.0385(4) 0.0408(5) 0.0349(4) -0.0017(3) 0.0182(3) -0.0036(3)
 I1 0.0402(5) 0.0431(5) 0.0339(4) 0.0002(4) 0.0163(4) 0.0044(4)
 Cu2 0.0359(8) 0.0369(8) 0.0320(8) -0.0036(6) 0.0201(6) -0.0046(6)
 Cu1 0.0352(8) 0.0354(8) 0.0360(8) 0.0034(6) 0.0191(7) 0.0040(6)
 O1 0.060(6) 0.038(5) 0.043(5) -0.009(4) 0.031(5) -0.002(4)
 N6 0.039(6) 0.029(5) 0.035(5) 0.001(4) 0.017(5) 0.002(4)
 N2 0.037(6) 0.033(5) 0.038(6) 0.004(4) 0.022(5) 0.005(4)
 N4 0.034(5) 0.049(6) 0.024(5) -0.004(4) 0.020(4) -0.007(5)
 N3 0.039(6) 0.041(6) 0.032(5) 0.002(4) 0.023(5) 0.002(5)
 O2 0.073(7) 0.050(6) 0.046(5) 0.006(5) 0.036(5) -0.009(5)
 N5 0.041(6) 0.034(5) 0.031(5) 0.006(4) 0.019(5) 0.002(4)
 N1 0.033(5) 0.042(6) 0.035(5) 0.000(4) 0.021(4) 0.002(4)
 C8 0.031(6) 0.039(6) 0.019(5) 0.006(5) 0.013(5) 0.004(5)
 C22 0.030(6) 0.041(7) 0.026(6) 0.007(5) 0.014(5) 0.009(5)
 C24 0.031(6) 0.032(6) 0.027(6) -0.008(5) 0.013(5) -0.003(5)
 C1 0.041(7) 0.036(6) 0.028(6) -0.003(5) 0.023(5) -0.001(5)
 C12 0.030(6) 0.041(7) 0.028(6) -0.006(5) 0.015(5) -0.001(5)
 C11 0.038(6) 0.030(6) 0.025(6) 0.004(5) 0.011(5) -0.001(5)
 C9 0.029(6) 0.027(6) 0.045(7) 0.003(5) 0.018(5) -0.006(5)
 C28 0.028(6) 0.033(6) 0.036(6) -0.001(5) 0.020(5) 0.001(5)
 C29 0.035(6) 0.042(7) 0.024(6) -0.001(5) 0.019(5) -0.003(5)
 C27 0.024(6) 0.041(7) 0.038(7) 0.001(5) 0.013(5) 0.001(5)
 C23 0.043(7) 0.048(7) 0.023(6) 0.006(5) 0.016(5) 0.005(6)
 C7 0.030(6) 0.037(6) 0.028(6) 0.002(5) 0.015(5) -0.002(5)
 C13 0.033(7) 0.052(8) 0.021(6) 0.001(5) 0.003(5) -0.006(6)
 C10 0.037(6) 0.030(6) 0.028(6) 0.005(5) 0.015(5) 0.001(5)
 C30 0.025(6) 0.047(7) 0.027(6) -0.002(5) 0.015(5) -0.003(5)
 C3 0.036(6) 0.036(6) 0.026(6) 0.003(5) 0.021(5) 0.007(5)
 C37 0.034(6) 0.034(6) 0.032(6) -0.005(5) 0.020(5) -0.001(5)
 C2 0.039(7) 0.041(7) 0.030(6) -0.011(5) 0.022(5) -0.004(5)
 C38 0.039(7) 0.047(7) 0.033(6) 0.000(6) 0.021(6) -0.004(6)
 C6 0.029(6) 0.035(6) 0.024(6) -0.002(5) 0.013(5) 0.007(5)
 C32 0.034(6) 0.040(7) 0.019(5) 0.002(5) 0.016(5) 0.005(5)
 C15 0.043(7) 0.028(6) 0.049(8) -0.001(5) 0.025(6) 0.000(5)
 C35 0.032(6) 0.044(7) 0.030(6) 0.007(5) 0.011(5) -0.008(5)
 C36 0.030(6) 0.055(8) 0.037(7) 0.001(6) 0.021(5) -0.001(6)
 C16 0.033(6) 0.027(6) 0.041(7) -0.007(5) 0.017(5) -0.001(5)
 C25 0.039(7) 0.041(7) 0.033(6) 0.016(5) 0.020(5) 0.007(5)
 C19 0.054(8) 0.037(7) 0.032(6) -0.001(5) 0.027(6) 0.003(6)
 C14 0.050(8) 0.032(6) 0.044(7) -0.001(5) 0.027(6) 0.000(6)
 C31 0.030(6) 0.039(7) 0.026(6) 0.000(5) 0.013(5) 0.001(5)
 C40 0.064(9) 0.029(6) 0.029(6) -0.001(5) 0.027(6) -0.003(6)
 C5 0.033(7) 0.071(9) 0.041(7) -0.029(7) 0.021(6) -0.021(6)
 C26 0.043(7) 0.038(7) 0.047(8) 0.007(6) 0.024(6) 0.003(6)
 C20 0.044(7) 0.028(6) 0.032(6) -0.006(5) 0.012(5) 0.000(5)
 C01A 0.040(7) 0.031(7) 0.055(8) -0.001(6) 0.027(6) 0.000(5)
 C34 0.056(8) 0.064(9) 0.054(8) 0.031(7) 0.043(7) 0.019(7)
 C17 0.035(7) 0.040(7) 0.043(7) -0.011(6) 0.017(6) -0.003(5)
 C42 0.041(7) 0.036(7) 0.056(8) 0.007(6) 0.033(6) 0.011(6)
 C4 0.038(7) 0.081(10) 0.037(7) -0.022(7) 0.029(6) -0.022(7)
 C39 0.041(7) 0.042(7) 0.041(7) 0.002(6) 0.013(6) 0.001(6)
 C18 0.043(7) 0.043(7) 0.049(8) -0.008(6) 0.024(6) -0.006(6)
 N7 0.109(13) 0.084(11) 0.063(10) 0.007(8) 0.038(9) 0.031(10)
 C41 0.050(8) 0.043(8) 0.058(9) 0.000(7) 0.034(7) -0.009(6)
 C33 0.068(9) 0.048(8) 0.059(9) 0.021(7) 0.053(8) 0.021(7)
 C46 0.054(9) 0.071(11) 0.072(11) -0.008(9) 0.027(8) -0.006(8)
 C21 0.060(10) 0.056(9) 0.057(9) -0.019(8) 0.019(8) -0.001(8)
 C48 0.078(12) 0.065(11) 0.066(11) 0.000(9) 0.021(9) 0.017(9)
 C47 0.050(9) 0.049(9) 0.067(10) 0.003(7) 0.022(8) -0.009(7)
 C43 0.070(10) 0.067(10) 0.034(8) 0.013(7) 0.011(7) -0.009(8)
 C54 0.056(10) 0.092(13) 0.063(11) -0.016(10) 0.022(9) 0.011(9)
 C51 0.070(13) 0.027(9) 0.19(3) 0.026(13) 0.040(15) 0.010(8)
 C52 0.052(10) 0.050(10) 0.147(19) 0.041(12) 0.044(11) 0.007(8)
 C45 0.054(11) 0.17(2) 0.061(12) 0.000(14) 0.028(10) 0.001(13)
 C49 0.083(14) 0.067(13) 0.112(17) -0.030(12) -0.013(12) 0.026(11)
 C44 0.055(12) 0.27(4) 0.074(15) 0.08(2) 0.042(12) 0.047(18)
 C50 0.071(13) 0.076(15) 0.13(2) -0.036(14) 0.008(13) 0.005(11)
 C53 0.084(14) 0.104(16) 0.094(15) -0.046(13) 0.039(12) -0.004(12)
 C01X 0.070(14) 0.16(3) 0.17(3) 0.11(2) 0.077(17) 0.038(15)

_geom_special_details
;
 All esds (except the esd in the dihedral angle between two l.s. planes)
 are estimated using the full covariance matrix.  The cell esds are taken
 into account individually in the estimation of esds in distances, angles
 and torsion angles; correlations between esds in cell parameters are only
 used when they are defined by crystal symmetry.  An approximate (isotropic)
 treatment of cell esds is used for estimating esds involving l.s. planes.
;
loop_
  _geom_bond_atom_site_label_1
  _geom_bond_atom_site_label_2
  _geom_bond_distance
  _geom_bond_site_symmetry_2
  _geom_bond_publ_flag
 I2 Cu2 2.6725(16) 2_755 ?
 I2 Cu1 2.6354(17) . ?
 I1 Cu2 2.6481(17) . ?
 I1 Cu1 2.6624(17) 2_745 ?
 Cu2 Cu1 2.6451(19) 2_745 ?
 Cu2 N4 2.006(10) . ?
 Cu2 N3 2.022(9) . ?
 Cu1 N6 2.033(10) . ?
 Cu1 N2 2.049(10) 1_655 ?
 O1 C19 1.369(14) . ?
 O1 C21 1.420(16) . ?
 N6 C13 1.347(15) . ?
 N6 C14 1.335(15) . ?
 N2 C35 1.330(14) . ?
 N2 C34 1.338(15) . ?
 N4 C1 1.349(14) . ?
 N4 C5 1.344(14) . ?
 N3 C22 1.345(14) . ?
 N3 C26 1.333(15) . ?
 O2 C40 1.370(14) . ?
 O2 C43 1.410(17) . ?
 N5 C10 1.347(15) . ?
 N5 C6 1.345(14) . ?
 N1 C27 1.340(15) . ?
 N1 C31 1.359(14) . ?
 C8 C9 1.402(14) . ?
 C8 C7 1.383(16) . ?
 C8 C16 1.512(15) . ?
 C22 H22 0.9500 . ?
 C22 C23 1.392(15) . ?
 C24 C27 1.500(14) . ?
 C24 C23 1.404(16) . ?
 C24 C25 1.393(15) . ?
 C1 H1 0.9500 . ?
 C1 C2 1.367(16) . ?
 C12 H12 0.9500 . ?
 C12 C11 1.388(16) . ?
 C12 C13 1.384(15) . ?
 C11 C10 1.494(15) . ?
 C11 C15 1.387(16) . ?
 C9 H9 0.9500 . ?
 C9 C10 1.366(16) . ?
 C28 H28 0.9500 . ?
 C28 C29 1.418(14) . ?
 C28 C27 1.375(16) . ?
 C29 C30 1.391(16) . ?
 C29 C37 1.482(16) . ?
 C23 H23 0.9500 . ?
 C7 H7 0.9500 . ?
 C7 C6 1.370(15) . ?
 C13 H13 0.9500 . ?
 C30 H30 0.9500 . ?
 C30 C31 1.379(16) . ?
 C3 C2 1.382(15) . ?
 C3 C6 1.491(16) . ?
 C3 C4 1.366(16) . ?
 C37 C38 1.375(17) . ?
 C37 C42 1.410(15) . ?
 C2 H2 0.9500 . ?
 C38 H38 0.9500 . ?
 C38 C39 1.371(17) . ?
 C32 C36 1.385(16) . ?
 C32 C31 1.483(16) . ?
 C32 C33 1.373(15) . ?
 C15 H15 0.9500 . ?
 C15 C14 1.372(16) . ?
 C35 H35 0.9500 . ?
 C35 C36 1.387(17) . ?
 C36 H36 0.9500 . ?
 C16 C01A 1.371(16) . ?
 C16 C17 1.406(16) . ?
 C25 H25 0.9500 . ?
 C25 C26 1.381(16) . ?
 C19 C20 1.357(17) . ?
 C19 C18 1.388(17) . ?
 C14 H14 0.9500 . ?
 C40 C39 1.377(17) . ?
 C40 C41 1.379(18) . ?
 C5 H5 0.9500 . ?
 C5 C4 1.372(17) . ?
 C26 H26 0.9500 . ?
 C20 H20 0.9500 . ?
 C20 C01A 1.424(16) . ?
 C01A H01A 0.9500 . ?
 C34 H34 0.9500 . ?
 C34 C33 1.379(18) . ?
 C17 H17 0.9500 . ?
 C17 C18 1.379(17) . ?
 C42 H42 0.9500 . ?
 C42 C41 1.390(17) . ?
 C4 H4 0.9500 . ?
 C39 H39 0.9500 . ?
 C18 H18 0.9500 . ?
 N7 C54 1.13(2) . ?
 C41 H41 0.9500 . ?
 C33 H33 0.9500 . ?
 C46 H46 0.9500 . ?
 C46 C47 1.44(2) . ?
 C46 C45 1.35(2) . ?
 C21 H21A 0.9800 . ?
 C21 H21B 0.9800 . ?
 C21 H21C 0.9800 . ?
 C48 H48 0.9500 . ?
 C48 C47 1.42(2) . ?
 C48 C49 1.37(2) . ?
 C47 C52 1.41(2) . ?
 C43 H43A 0.9800 . ?
 C43 H43B 0.9800 . ?
 C43 H43C 0.9800 . ?
 C54 C53 1.47(2) . ?
 C51 H51 0.9500 . ?
 C51 C52 1.47(3) . ?
 C51 C50 1.39(3) . ?
 C52 C01X 1.39(3) . ?
 C45 H45 0.9500 . ?
 C45 C44 1.41(4) . ?
 C49 H49 0.9500 . ?
 C49 C50 1.32(3) . ?
 C44 H44 0.9500 . ?
 C44 C01X 1.40(4) . ?
 C50 H50 0.9500 . ?
 C53 H53A 0.9800 . ?
 C53 H53B 0.9800 . ?
 C53 H53C 0.9800 . ?
 C01X H01X 0.9500 . ?

loop_
  _geom_angle_atom_site_label_1
  _geom_angle_atom_site_label_2
  _geom_angle_atom_site_label_3
  _geom_angle
  _geom_angle_site_symmetry_1
  _geom_angle_site_symmetry_3
  _geom_angle_publ_flag
 Cu1 I2 Cu2 59.77(5) . 2_755 ?
 Cu2 I1 Cu1 59.75(5) . 2_745 ?
 I1 Cu2 I2 119.41(6) . 2_745 ?
 Cu1 Cu2 I2 59.42(5) 2_745 2_745 ?
 Cu1 Cu2 I1 60.40(5) 2_745 . ?
 N4 Cu2 I2 100.6(3) . 2_745 ?
 N4 Cu2 I1 104.6(3) . . ?
 N4 Cu2 Cu1 121.8(2) . 2_745 ?
 N4 Cu2 N3 113.2(4) . . ?
 N3 Cu2 I2 108.4(3) . 2_745 ?
 N3 Cu2 I1 110.4(3) . . ?
 N3 Cu2 Cu1 124.9(3) . 2_745 ?
 I2 Cu1 I1 120.26(6) . 2_755 ?
 I2 Cu1 Cu2 60.81(5) . 2_755 ?
 Cu2 Cu1 I1 59.86(5) 2_755 2_755 ?
 N6 Cu1 I2 106.8(3) . . ?
 N6 Cu1 I1 104.1(3) . 2_755 ?
 N6 Cu1 Cu2 128.8(3) . 2_755 ?
 N6 Cu1 N2 117.8(4) . 1_655 ?
 N2 Cu1 I2 106.7(3) 1_655 . ?
 N2 Cu1 I1 101.9(3) 1_655 2_755 ?
 N2 Cu1 Cu2 113.3(3) 1_655 2_755 ?
 C19 O1 C21 118.3(10) . . ?
 C13 N6 Cu1 120.7(8) . . ?
 C14 N6 Cu1 122.6(8) . . ?
 C14 N6 C13 116.7(10) . . ?
 C35 N2 Cu1 123.3(8) . 1_455 ?
 C35 N2 C34 115.7(10) . . ?
 C34 N2 Cu1 120.4(8) . 1_455 ?
 C1 N4 Cu2 126.4(7) . . ?
 C5 N4 Cu2 119.1(8) . . ?
 C5 N4 C1 114.2(10) . . ?
 C22 N3 Cu2 117.9(8) . . ?
 C26 N3 Cu2 124.6(8) . . ?
 C26 N3 C22 117.3(10) . . ?
 C40 O2 C43 117.5(10) . . ?
 C6 N5 C10 118.2(10) . . ?
 C27 N1 C31 117.4(10) . . ?
 C9 C8 C16 121.3(10) . . ?
 C7 C8 C9 117.8(10) . . ?
 C7 C8 C16 120.8(10) . . ?
 N3 C22 H22 118.8 . . ?
 N3 C22 C23 122.5(10) . . ?
 C23 C22 H22 118.8 . . ?
 C23 C24 C27 121.2(10) . . ?
 C25 C24 C27 121.5(10) . . ?
 C25 C24 C23 117.3(10) . . ?
 N4 C1 H1 117.8 . . ?
 N4 C1 C2 124.4(10) . . ?
 C2 C1 H1 117.8 . . ?
 C11 C12 H12 120.5 . . ?
 C13 C12 H12 120.5 . . ?
 C13 C12 C11 119.0(11) . . ?
 C12 C11 C10 121.1(10) . . ?
 C15 C11 C12 117.4(11) . . ?
 C15 C11 C10 121.5(10) . . ?
 C8 C9 H9 120.2 . . ?
 C10 C9 C8 119.6(10) . . ?
 C10 C9 H9 120.2 . . ?
 C29 C28 H28 120.4 . . ?
 C27 C28 H28 120.4 . . ?
 C27 C28 C29 119.1(10) . . ?
 C28 C29 C37 120.9(10) . . ?
 C30 C29 C28 116.1(10) . . ?
 C30 C29 C37 123.0(9) . . ?
 N1 C27 C24 115.7(10) . . ?
 N1 C27 C28 124.1(10) . . ?
 C28 C27 C24 120.1(10) . . ?
 C22 C23 C24 119.6(11) . . ?
 C22 C23 H23 120.2 . . ?
 C24 C23 H23 120.2 . . ?
 C8 C7 H7 120.3 . . ?
 C6 C7 C8 119.4(10) . . ?
 C6 C7 H7 120.3 . . ?
 N6 C13 C12 123.4(11) . . ?
 N6 C13 H13 118.3 . . ?
 C12 C13 H13 118.3 . . ?
 N5 C10 C11 115.5(10) . . ?
 N5 C10 C9 122.2(10) . . ?
 C9 C10 C11 122.2(10) . . ?
 C29 C30 H30 119.3 . . ?
 C31 C30 C29 121.5(10) . . ?
 C31 C30 H30 119.3 . . ?
 C2 C3 C6 122.9(10) . . ?
 C4 C3 C2 117.0(11) . . ?
 C4 C3 C6 120.1(10) . . ?
 C38 C37 C29 122.0(10) . . ?
 C38 C37 C42 116.9(11) . . ?
 C42 C37 C29 121.1(10) . . ?
 C1 C2 C3 119.7(10) . . ?
 C1 C2 H2 120.1 . . ?
 C3 C2 H2 120.1 . . ?
 C37 C38 H38 118.4 . . ?
 C39 C38 C37 123.3(11) . . ?
 C39 C38 H38 118.4 . . ?
 N5 C6 C7 122.7(11) . . ?
 N5 C6 C3 115.4(9) . . ?
 C7 C6 C3 121.8(10) . . ?
 C36 C32 C31 121.5(10) . . ?
 C33 C32 C36 116.4(11) . . ?
 C33 C32 C31 122.0(10) . . ?
 C11 C15 H15 120.0 . . ?
 C14 C15 C11 119.9(12) . . ?
 C14 C15 H15 120.0 . . ?
 N2 C35 H35 117.9 . . ?
 N2 C35 C36 124.2(11) . . ?
 C36 C35 H35 117.9 . . ?
 C32 C36 C35 119.4(10) . . ?
 C32 C36 H36 120.3 . . ?
 C35 C36 H36 120.3 . . ?
 C01A C16 C8 120.9(10) . . ?
 C01A C16 C17 118.9(11) . . ?
 C17 C16 C8 120.2(10) . . ?
 C24 C25 H25 120.6 . . ?
 C26 C25 C24 118.9(11) . . ?
 C26 C25 H25 120.6 . . ?
 O1 C19 C18 115.0(11) . . ?
 C20 C19 O1 123.5(12) . . ?
 C20 C19 C18 121.5(11) . . ?
 N6 C14 C15 123.4(12) . . ?
 N6 C14 H14 118.3 . . ?
 C15 C14 H14 118.3 . . ?
 N1 C31 C30 121.7(10) . . ?
 N1 C31 C32 115.9(10) . . ?
 C30 C31 C32 122.4(10) . . ?
 O2 C40 C39 125.0(12) . . ?
 O2 C40 C41 116.5(11) . . ?
 C39 C40 C41 118.5(11) . . ?
 N4 C5 H5 117.6 . . ?
 N4 C5 C4 124.8(11) . . ?
 C4 C5 H5 117.6 . . ?
 N3 C26 C25 124.4(11) . . ?
 N3 C26 H26 117.8 . . ?
 C25 C26 H26 117.8 . . ?
 C19 C20 H20 120.3 . . ?
 C19 C20 C01A 119.3(11) . . ?
 C01A C20 H20 120.3 . . ?
 C16 C01A C20 120.1(11) . . ?
 C16 C01A H01A 119.9 . . ?
 C20 C01A H01A 119.9 . . ?
 N2 C34 H34 118.2 . . ?
 N2 C34 C33 123.5(11) . . ?
 C33 C34 H34 118.2 . . ?
 C16 C17 H17 119.5 . . ?
 C18 C17 C16 121.1(12) . . ?
 C18 C17 H17 119.5 . . ?
 C37 C42 H42 120.2 . . ?
 C41 C42 C37 119.7(12) . . ?
 C41 C42 H42 120.2 . . ?
 C3 C4 C5 119.7(11) . . ?
 C3 C4 H4 120.2 . . ?
 C5 C4 H4 120.2 . . ?
 C38 C39 C40 119.9(12) . . ?
 C38 C39 H39 120.0 . . ?
 C40 C39 H39 120.0 . . ?
 C19 C18 H18 120.5 . . ?
 C17 C18 C19 119.0(12) . . ?
 C17 C18 H18 120.5 . . ?
 C40 C41 C42 121.7(12) . . ?
 C40 C41 H41 119.2 . . ?
 C42 C41 H41 119.2 . . ?
 C32 C33 C34 120.5(11) . . ?
 C32 C33 H33 119.8 . . ?
 C34 C33 H33 119.8 . . ?
 C47 C46 H46 119.1 . . ?
 C45 C46 H46 119.1 . . ?
 C45 C46 C47 121.7(19) . . ?
 O1 C21 H21A 109.5 . . ?
 O1 C21 H21B 109.5 . . ?
 O1 C21 H21C 109.5 . . ?
 H21A C21 H21B 109.5 . . ?
 H21A C21 H21C 109.5 . . ?
 H21B C21 H21C 109.5 . . ?
 C47 C48 H48 119.6 . . ?
 C49 C48 H48 119.6 . . ?
 C49 C48 C47 120.9(18) . . ?
 C48 C47 C46 121.9(15) . . ?
 C52 C47 C46 118.4(17) . . ?
 C52 C47 C48 119.7(17) . . ?
 O2 C43 H43A 109.5 . . ?
 O2 C43 H43B 109.5 . . ?
 O2 C43 H43C 109.5 . . ?
 H43A C43 H43B 109.5 . . ?
 H43A C43 H43C 109.5 . . ?
 H43B C43 H43C 109.5 . . ?
 N7 C54 C53 176(2) . . ?
 C52 C51 H51 120.7 . . ?
 C50 C51 H51 120.7 . . ?
 C50 C51 C52 118.6(16) . . ?
 C47 C52 C51 116.9(19) . . ?
 C01X C52 C47 118(2) . . ?
 C01X C52 C51 125(2) . . ?
 C46 C45 H45 119.5 . . ?
 C46 C45 C44 121(2) . . ?
 C44 C45 H45 119.5 . . ?
 C48 C49 H49 119.5 . . ?
 C50 C49 C48 121(2) . . ?
 C50 C49 H49 119.5 . . ?
 C45 C44 H44 121.6 . . ?
 C01X C44 C45 117(2) . . ?
 C01X C44 H44 121.6 . . ?
 C51 C50 H50 118.6 . . ?
 C49 C50 C51 123(2) . . ?
 C49 C50 H50 118.6 . . ?
 C54 C53 H53A 109.5 . . ?
 C54 C53 H53B 109.5 . . ?
 C54 C53 H53C 109.5 . . ?
 H53A C53 H53B 109.5 . . ?
 H53A C53 H53C 109.5 . . ?
 H53B C53 H53C 109.5 . . ?
 C52 C01X C44 124(2) . . ?
 C52 C01X H01X 117.9 . . ?
 C44 C01X H01X 117.9 . . ?

_shelx_res_file
;
TITL 1y.res in P2(1)/c
    1y.res
    created by SHELXL-2016/6 at 16:51:10 on 24-May-2019
CELL 0.71073 23.576 12.8738 17.7114 90 110.88 90
ZERR 4 0.0019 0.0011 0.0014 0 0.002 0
LATT 1
SYMM -X,0.5+Y,0.5-Z
SFAC C H Cu I N O
UNIT 224 180 8 8 28 8

L.S. 9
PLAN  20
TEMP -173.12
BOND $H
htab
fmap 2
acta
REM <olex2.extras>
REM <HklSrc "%.\\1y.hkl">
REM </olex2.extras>

WGHT    0.000100  165.377716
FVAR       0.17892
I2    4    1.290920    0.894861    0.344551    11.00000    0.03851    0.04081 =
         0.03487   -0.00171    0.01825   -0.00356
I1    4    0.800654    0.116969    0.315115    11.00000    0.04016    0.04311 =
         0.03391    0.00023    0.01627    0.00436
CU2   3    0.747163    0.300700    0.299377    11.00000    0.03594    0.03687 =
         0.03196   -0.00357    0.02014   -0.00457
CU1   3    1.249471    0.702977    0.330329    11.00000    0.03516    0.03542 =
         0.03600    0.00336    0.01910    0.00400
O1    6    0.934581    1.121596    0.724305    11.00000    0.06037    0.03845 =
         0.04294   -0.00909    0.03103   -0.00184
N6    5    1.182000    0.701060    0.376615    11.00000    0.03883    0.02946 =
         0.03526    0.00092    0.01659    0.00220
N2    5    0.322986    0.608590    0.382993    11.00000    0.03729    0.03307 =
         0.03849    0.00407    0.02247    0.00453
N4    5    0.813470    0.397850    0.363122    11.00000    0.03409    0.04941 =
         0.02406   -0.00441    0.01968   -0.00728
N3    5    0.677113    0.295084    0.339816    11.00000    0.03917    0.04079 =
         0.03225    0.00208    0.02269    0.00232
O2    6    0.474406   -0.120234    0.738204    11.00000    0.07322    0.05002 =
         0.04580    0.00567    0.03557   -0.00927
N5    5    0.992849    0.638769    0.438581    11.00000    0.04070    0.03420 =
         0.03106    0.00604    0.01943    0.00224
N1    5    0.499295    0.364423    0.427649    11.00000    0.03252    0.04163 =
         0.03496    0.00021    0.02118    0.00241
C8    1    0.975096    0.800771    0.531315    11.00000    0.03073    0.03907 =
         0.01907    0.00635    0.01265    0.00432
C22   1    0.680246    0.226016    0.398163    11.00000    0.02968    0.04114 =
         0.02581    0.00670    0.01364    0.00903
AFIX  43
H22   2    0.713232    0.178504    0.414980    11.00000   -1.20000
AFIX   0
C24   1    0.587262    0.289765    0.409757    11.00000    0.03116    0.03224 =
         0.02690   -0.00794    0.01327   -0.00327
C1    1    0.815790    0.452052    0.429344    11.00000    0.04116    0.03552 =
         0.02813   -0.00280    0.02293   -0.00101
AFIX  43
H1    2    0.787234    0.435156    0.454070    11.00000   -1.20000
AFIX   0
C12   1    1.134052    0.778929    0.461906    11.00000    0.03026    0.04079 =
         0.02762   -0.00628    0.01469   -0.00083
AFIX  43
H12   2    1.135477    0.829265    0.501764    11.00000   -1.20000
AFIX   0
C11   1    1.084930    0.712003    0.432383    11.00000    0.03787    0.02952 =
         0.02502    0.00448    0.01128   -0.00093
C9    1    1.024769    0.799983    0.505375    11.00000    0.02923    0.02662 =
         0.04463    0.00257    0.01821   -0.00589
AFIX  43
H9    2    1.052568    0.856397    0.518065    11.00000   -1.20000
AFIX   0
C28   1    0.534868    0.200654    0.491535    11.00000    0.02765    0.03344 =
         0.03588   -0.00085    0.02022    0.00067
AFIX  43
H28   2    0.562841    0.144837    0.500269    11.00000   -1.20000
AFIX   0
C29   1    0.488631    0.197998    0.525252    11.00000    0.03452    0.04227 =
         0.02387   -0.00058    0.01857   -0.00267
C27   1    0.538696    0.285092    0.446019    11.00000    0.02354    0.04097 =
         0.03766    0.00140    0.01343    0.00085
C23   1    0.636980    0.221532    0.434834    11.00000    0.04259    0.04844 =
         0.02292    0.00648    0.01557    0.00469
AFIX  43
H23   2    0.641068    0.172584    0.476589    11.00000   -1.20000
AFIX   0
C7    1    0.935364    0.717691    0.509793    11.00000    0.02955    0.03689 =
         0.02775    0.00201    0.01486   -0.00201
AFIX  43
H7    2    0.901693    0.714653    0.527261    11.00000   -1.20000
AFIX   0
C13   1    1.180932    0.771282    0.432446    11.00000    0.03297    0.05161 =
         0.02074    0.00149    0.00311   -0.00639
AFIX  43
H13   2    1.214108    0.818027    0.452668    11.00000   -1.20000
AFIX   0
C10   1    1.032925    0.717587    0.461748    11.00000    0.03711    0.02987 =
         0.02807    0.00451    0.01547    0.00075
C30   1    0.448395    0.281269    0.506314    11.00000    0.02505    0.04725 =
         0.02742   -0.00166    0.01511   -0.00263
AFIX  43
H30   2    0.416437    0.282733    0.527154    11.00000   -1.20000
AFIX   0
C3    1    0.900718    0.553347    0.431663    11.00000    0.03619    0.03628 =
         0.02628    0.00257    0.02097    0.00666
C37   1    0.484590    0.110783    0.577695    11.00000    0.03380    0.03398 =
         0.03196   -0.00498    0.02002   -0.00140
C2    1    0.856495    0.529684    0.463259    11.00000    0.03913    0.04142 =
         0.03009   -0.01115    0.02171   -0.00423
AFIX  43
H2    2    0.854377    0.567199    0.508367    11.00000   -1.20000
AFIX   0
C38   1    0.532686    0.045229    0.613754    11.00000    0.03897    0.04662 =
         0.03347    0.00017    0.02106   -0.00427
AFIX  43
H38   2    0.568480    0.053832    0.601474    11.00000   -1.20000
AFIX   0
C6    1    0.945015    0.639781    0.463033    11.00000    0.02942    0.03536 =
         0.02412   -0.00159    0.01299    0.00726
C32   1    0.410438    0.449731    0.435101    11.00000    0.03371    0.04007 =
         0.01914    0.00212    0.01584    0.00481
C15   1    1.086764    0.638305    0.376141    11.00000    0.04294    0.02767 =
         0.04912   -0.00094    0.02536   -0.00016
AFIX  43
H15   2    1.054189    0.590646    0.354720    11.00000   -1.20000
AFIX   0
C35   1    0.369567    0.602239    0.357544    11.00000    0.03160    0.04356 =
         0.02981    0.00683    0.01065   -0.00762
AFIX  43
H35   2    0.373170    0.654148    0.321394    11.00000   -1.20000
AFIX   0
C36   1    0.413220    0.524654    0.380421    11.00000    0.02982    0.05483 =
         0.03667    0.00106    0.02084   -0.00061
AFIX  43
H36   2    0.444737    0.522926    0.358782    11.00000   -1.20000
AFIX   0
C16   1    0.965935    0.888054    0.582954    11.00000    0.03270    0.02703 =
         0.04129   -0.00702    0.01727   -0.00149
C25   1    0.584265    0.360204    0.348729    11.00000    0.03943    0.04074 =
         0.03282    0.01551    0.02017    0.00737
AFIX  43
H25   2    0.551310    0.407502    0.329190    11.00000   -1.20000
AFIX   0
C19   1    0.947909    1.045473    0.679289    11.00000    0.05415    0.03678 =
         0.03194   -0.00097    0.02731    0.00330
C14   1    1.135694    0.634358    0.351507    11.00000    0.04993    0.03152 =
         0.04432   -0.00107    0.02653    0.00028
AFIX  43
H14   2    1.136659    0.581373    0.314651    11.00000   -1.20000
AFIX   0
C31   1    0.453850    0.361732    0.457976    11.00000    0.02994    0.03896 =
         0.02650    0.00003    0.01254    0.00066
C40   1    0.480294   -0.047041    0.685311    11.00000    0.06432    0.02900 =
         0.02860   -0.00074    0.02711   -0.00305
C5    1    0.858099    0.420907    0.335381    11.00000    0.03283    0.07105 =
         0.04105   -0.02881    0.02142   -0.02051
AFIX  43
H5    2    0.859143    0.383757    0.289550    11.00000   -1.20000
AFIX   0
C26   1    0.630032    0.360092    0.317117    11.00000    0.04297    0.03832 =
         0.04664    0.00742    0.02388    0.00307
AFIX  43
H26   2    0.627792    0.409709    0.276450    11.00000   -1.20000
AFIX   0
C20   1    1.005023    1.024730    0.681958    11.00000    0.04359    0.02808 =
         0.03243   -0.00643    0.01248   -0.00016
AFIX  43
H20   2    1.038578    1.062672    0.717239    11.00000   -1.20000
AFIX   0
C01A  1    1.014151    0.945495    0.631327    11.00000    0.04024    0.03141 =
         0.05462   -0.00150    0.02660   -0.00049
AFIX  43
H01A  2    1.053743    0.932427    0.631082    11.00000   -1.20000
AFIX   0
C34   1    0.322416    0.538569    0.438565    11.00000    0.05561    0.06383 =
         0.05398    0.03102    0.04320    0.01948
AFIX  43
H34   2    0.290869    0.542513    0.460061    11.00000   -1.20000
AFIX   0
C17   1    0.907433    0.911554    0.581953    11.00000    0.03486    0.03982 =
         0.04320   -0.01051    0.01669   -0.00325
AFIX  43
H17   2    0.873600    0.873538    0.547384    11.00000   -1.20000
AFIX   0
C42   1    0.431253    0.092886    0.594426    11.00000    0.04092    0.03613 =
         0.05628    0.00694    0.03268    0.01084
AFIX  43
H42   2    0.396077    0.133840    0.568965    11.00000   -1.20000
AFIX   0
C4    1    0.902270    0.494163    0.368392    11.00000    0.03766    0.08139 =
         0.03652   -0.02153    0.02881   -0.02159
AFIX  43
H4    2    0.933775    0.503697    0.347372    11.00000   -1.20000
AFIX   0
C39   1    0.531582   -0.031929    0.666542    11.00000    0.04127    0.04191 =
         0.04093    0.00168    0.01270    0.00082
AFIX  43
H39   2    0.566149   -0.074928    0.690152    11.00000   -1.20000
AFIX   0
C18   1    0.898359    0.988882    0.630330    11.00000    0.04265    0.04261 =
         0.04939   -0.00759    0.02443   -0.00629
AFIX  43
H18   2    0.858779    1.003193    0.630140    11.00000   -1.20000
AFIX   0

N7    5    0.149016    0.357475    0.343152    11.00000    0.10894    0.08425 =
         0.06303    0.00732    0.03774    0.03149
C41   1    0.430408    0.015017    0.648361    11.00000    0.05004    0.04319 =
         0.05789    0.00033    0.03381   -0.00909
AFIX  43
H41   2    0.394535    0.004268    0.660072    11.00000   -1.20000
AFIX   0
C33   1    0.365176    0.460988    0.466299    11.00000    0.06826    0.04839 =
         0.05888    0.02092    0.05331    0.02112
AFIX  43
H33   2    0.363300    0.414998    0.507291    11.00000   -1.20000
AFIX   0

C46   1    0.276538    0.088503    0.588022    11.00000    0.05373    0.07111 =
         0.07170   -0.00811    0.02737   -0.00570
AFIX  43
H46   2    0.278804    0.018197    0.605146    11.00000   -1.20000
AFIX   0

C21   1    0.982852    1.183750    0.775120    11.00000    0.06040    0.05555 =
         0.05731   -0.01946    0.01946   -0.00102
AFIX 137
H21A  2    1.014039    1.138930    0.812182    11.00000   -1.50000
H21B  2    0.967280    1.231390    0.806300    11.00000   -1.50000
H21C  2    1.000559    1.223838    0.741957    11.00000   -1.50000
AFIX   0

C48   1    0.303496    0.148287    0.730522    11.00000    0.07820    0.06543 =
         0.06640   -0.00040    0.02099    0.01669
AFIX  43
H48   2    0.306108    0.078194    0.748217    11.00000   -1.20000
AFIX   0
C47   1    0.288195    0.169947    0.647265    11.00000    0.04982    0.04870 =
         0.06718    0.00322    0.02156   -0.00850

C43   1    0.523569   -0.188413    0.773359    11.00000    0.06960    0.06724 =
         0.03371    0.01304    0.01138   -0.00908
AFIX 137
H43A  2    0.531819   -0.227039    0.730712    11.00000   -1.50000
H43B  2    0.513439   -0.237235    0.809093    11.00000   -1.50000
H43C  2    0.559627   -0.148362    0.804713    11.00000   -1.50000
AFIX   0

C54   1    0.150069    0.331677    0.282862    11.00000    0.05648    0.09189 =
         0.06306   -0.01553    0.02243    0.01112
C51   1    0.295340    0.354874    0.682728    11.00000    0.06952    0.02730 =
         0.19099    0.02553    0.03962    0.01048
AFIX  43
H51   2    0.292874    0.426298    0.668428    11.00000   -1.20000
AFIX   0
C52   1    0.284021    0.273890    0.620726    11.00000    0.05180    0.04951 =
         0.14663    0.04105    0.04361    0.00679
C45   1    0.262441    0.109446    0.508615    11.00000    0.05410    0.17457 =
         0.06076   -0.00034    0.02777    0.00098
AFIX  43
H45   2    0.254424    0.053821    0.471005    11.00000   -1.20000
AFIX   0
C49   1    0.314572    0.226912    0.785838    11.00000    0.08263    0.06708 =
         0.11169   -0.02979   -0.01283    0.02645
AFIX  43
H49   2    0.325898    0.210590    0.841588    11.00000   -1.20000
AFIX   0
C44   1    0.259470    0.212552    0.480845    11.00000    0.05506    0.27043 =
         0.07385    0.08053    0.04159    0.04665
AFIX  43
H44   2    0.251943    0.227940    0.425658    11.00000   -1.20000
AFIX   0
C50   1    0.309791    0.324763    0.763077    11.00000    0.07142    0.07581 =
         0.12556   -0.03613    0.00767    0.00546
AFIX  43
H50   2    0.316466    0.377186    0.803070    11.00000   -1.20000
AFIX   0

C53   1    0.147386    0.301722    0.201787    11.00000    0.08402    0.10417 =
         0.09423   -0.04603    0.03855   -0.00377
AFIX 137
H53A  2    0.158499    0.228354    0.201899    11.00000   -1.50000
H53B  2    0.175784    0.344516    0.186163    11.00000   -1.50000
H53C  2    0.106083    0.312274    0.163113    11.00000   -1.50000
AFIX   0

C01X  1    0.268136    0.291313    0.538428    11.00000    0.06971    0.15949 =
         0.16676    0.11318    0.07678    0.03802
AFIX  43
H01X  2    0.262795    0.361180    0.519959    11.00000   -1.20000
AFIX   0
HKLF 4


REM  1y.res in P2(1)/c
REM R1 =  0.0817 for    6320 Fo > 4sig(Fo)  and  0.1322 for all    9191 data
REM    625 parameters refined using      0 restraints

END

WGHT      0.0000    165.3155

REM Instructions for potential hydrogen bonds
HTAB C22 I1
EQIV $5 -x+2, -y+1, -z+1
HTAB C12 I1_$5
HTAB C23 I2_$5
HTAB C13 I2
EQIV $2 -x+2, y+1/2, -z+1/2
HTAB C14 I1_$2
EQIV $6 x, -y+3/2, z-1/2
HTAB C5 O1_$6

REM Highest difference peak  2.160,  deepest hole -1.682,  1-sigma level  0.208
Q1    1   0.3781  0.6131  0.5054  11.00000  0.05    2.16
Q2    1   0.3409  0.7043  0.3590  11.00000  0.05    1.96
Q3    1   0.2879  0.1629  0.8461  11.00000  0.05    1.93
Q4    1   0.8961  0.3918  0.4770  11.00000  0.05    1.93
Q5    1   0.1983  0.1742  0.1883  11.00000  0.05    1.87
Q6    1   1.1558  0.7960  0.5390  11.00000  0.05    1.86
Q7    1   0.7719  0.0970  0.3287  11.00000  0.05    1.74
Q8    1   0.7948  0.0614  0.3429  11.00000  0.05    1.73
Q9    1   0.6608  0.2005  0.5063  11.00000  0.05    1.73
Q10   1   0.2484  0.0769  0.7018  11.00000  0.05    1.72
Q11   1   0.2500  0.5170  0.7007  11.00000  0.05    1.69
Q12   1   0.8470  0.3035  0.3315  11.00000  0.05    1.59
Q13   1   0.3392  0.4152  0.8630  11.00000  0.05    1.59
Q14   1   1.2827  0.9436  0.3082  11.00000  0.05    1.53
Q15   1   0.2450  0.4160  0.8315  11.00000  0.05    1.49
Q16   1   0.2456  0.5332  0.3334  11.00000  0.05    1.37
Q17   1   0.1594  0.4278  0.1734  11.00000  0.05    1.25
Q18   1   1.3210  0.9255  0.3332  11.00000  0.05    1.23
Q19   1   0.8107  0.1591  0.3535  11.00000  0.05    1.22
Q20   1   0.3380 -0.0122  0.4922  11.00000  0.05    1.18
;
_shelx_res_checksum                88
_shelx_hkl_file
;
   0   0   2  627.94   20.10
   0   0  -2  577.94   20.90
   0   0   3    1.50    1.40
   0   0  -3    2.90    2.50
   0   0   3    1.30    1.20
   0   0   3   -3.10    2.20
   0   0  -4 1632.74   51.49
   0   0   4 1671.13   51.39
   0   0   4 1633.44   50.69
   0   0  -4 1332.27   52.19
   0   0   5    0.40    1.70
   0   0   5    2.00    2.20
   0   0  -5   -0.70    1.90
   0   0  -6 5040.20  157.38
   0   0   6 4577.24  155.28
   0   0  -6 5004.40  155.28
   0   0   6 5193.28  155.18
   0   0  -7    5.60    4.80
   0   0   7   -3.20    4.20
   0   0   7    2.40    2.30
   0   0   7    1.60    2.60
   0   0  -7   -0.30    2.00
   0   0  -7    3.60    3.30
   0   0  -8 2153.88   73.29
   0   0  -8 2020.90   70.59
   0   0  -8 1993.20   65.59
   0   0   8 2067.59   69.99
   0   0   8 2065.19   68.69
   0   0  -9   -2.10    3.70
   0   0   9   -2.70    3.20
   0   0  -9   -0.80    2.20
   0   0   9    1.40    3.10
   0   0  -9   -2.50    5.10
   0   0   9    7.00    7.00
   0   0  10  108.59    9.60
   0   0  10  126.89   14.10
   0   0 -10  104.39    7.70
   0   0 -10   87.79   14.30
   0   0 -10  112.99   11.90
   0   0  10   92.59   16.50
   0   0  11    1.00    7.70
   0   0  11   -0.60    3.70
   0   0 -11   -4.60    4.50
   0   0 -11   -2.80    5.80
   0   0 -11   -0.80    2.70
   0   0  11   -2.50    4.30
   0   0  12  332.47   19.60
   0   0 -12  302.47   16.00
   0   0 -12  331.77   21.90
   0   0 -12  378.06   31.80
   0   0  12  370.66   29.40
   0   0  13   -1.00   12.50
   0   0 -13    0.40    4.10
   0   0 -13    0.70    5.90
   0   0  13    0.80    4.60
   0   0 -14   19.80    9.50
   0   0  14   33.10   13.30
   0   0  15   -9.90   11.40
   0   0 -15   10.30    8.80
   0   0  16    3.80   11.30
   0   0 -16    6.90    7.90
   0   0 -17   -7.40    7.60
   0   0  17   -4.00   10.00
   0   0  18    5.50   10.60
   0   0 -18   -5.90    9.10
   0   0  19    1.00   12.20
   0   0 -19    5.00   10.70
   0   1   2  169.98    7.00
   0   1   2  172.98    7.30
   0   1   2  164.08    7.00
   0   1  -2  170.98    8.90
   0   1  -2  167.28    7.10
   0   1  -2  163.08    6.90
   0  -1   2  168.08    7.10
   0  -1  -2  165.48    7.00
   0  -1   2  169.58    8.80
   0  -1  -2  172.68    7.40
   0  -1  -2  159.58    7.10
   0   1   3 1981.30   64.59
   0   1   3 2028.90   64.79
   0   1  -3 2047.30   64.89
   0   1   3 2079.49   64.99
   0  -1   3 2104.89   67.29
   0  -1  -3 2015.30   64.69
   0  -1  -3 2035.00   65.09
   0  -1  -3 2035.40   64.89
   0  -1   3 2162.68   65.19
   0   1   4  247.28   11.20
   0   1   4  236.28   11.00
   0   1  -4  237.88   11.30
   0  -1  -4  243.68   11.50
   0  -1   4  243.78   11.40
   0  -1  -4  237.18   11.40
   0  -1   4  265.47   15.30
   0  -1  -4  244.98   11.40
   0   1  -5  618.74   23.70
   0   1   5  618.44   23.30
   0   1   5  532.55   24.50
   0  -1   5  640.14   23.80
   0  -1  -5  599.74   23.60
   0  -1  -5  617.14   23.90
   0  -1   5  644.74   27.30
   0  -1  -5  661.13   24.10
   0   1  -6 1187.78   41.60
   0   1   6 1150.28   41.00
   0   1   6 1198.68   40.90
   0  -1   6 1191.88   40.10
   0  -1  -6 1189.78   41.50
   0  -1   6 1132.49   44.90
   0  -1   6 1190.38   41.50
   0  -1  -6 1159.68   44.40
   0  -1  -6 1153.28   41.70
   0   1  -7  176.28   12.00
   0   1   7  183.78   11.00
   0   1   7  174.78   11.20
   0  -1  -7  171.88   11.90
   0  -1  -7  190.88   12.40
   0  -1   7  173.08   11.70
   0  -1   7  195.68   16.30
   0  -1   7  173.78   10.60
   0  -1  -7  160.88   11.40
   0   1  -8  922.41   36.10
   0   1   8  894.81   35.10
   0   1   8  973.30   35.10
   0  -1   8  979.30   42.00
   0  -1   8  916.31   34.10
   0  -1   8  878.11   35.50
   0  -1  -8  931.81   36.60
   0  -1  -8  874.41   36.00
   0   1   9  107.39   10.30
   0   1  -9  103.59   11.10
   0   1   9  118.09   10.00
   0   1  -9   87.39   15.50
   0  -1   9   83.89    9.00
   0  -1   9  139.99   17.20
   0  -1  -9   97.89   11.30
   0  -1  -9  110.69   11.70
   0  -1   9  105.89   10.50
   0   1  10    0.50    6.90
   0   1  10    8.30    4.00
   0   1 -10    4.30    7.60
   0   1  10   10.90    4.30
   0   1 -10   11.20    5.60
   0  -1 -10    7.70    5.20
   0  -1 -10    6.60    5.10
   0  -1  10   14.30    4.60
   0  -1  10    6.30    6.50
   0  -1  10   11.30    7.60
   0   1 -11  353.56   21.90
   0   1  11  402.46   21.70
   0   1  11  417.86   21.30
   0   1 -11  407.86   28.20
   0  -1  11  392.56   22.00
   0  -1  11  448.86   29.10
   0  -1 -11  401.46   23.70
   0  -1 -11  389.46   18.50
   0  -1  11  414.26   20.30
   0  -1 -11  403.16   23.60
   0   1  12  497.05   25.40
   0   1 -12  425.06   31.00
   0   1 -12  471.45   26.00
   0  -1 -12  444.26   26.40
   0  -1 -12  434.46   26.60
   0  -1  12  485.05   23.30
   0  -1  12  446.96   36.60
   0  -1 -12  479.65   21.40
   0   1  13   23.30    6.20
   0   1 -13   -1.50   10.60
   0   1  13   40.70   14.40
   0   1 -13   20.60    8.00
   0  -1  13   20.90    7.20
   0  -1 -13   14.00    5.60
   0  -1 -13   19.90    8.00
   0  -1 -13   29.00    8.90
   0  -1  13   18.00   11.60
   0   1 -14  274.37   22.30
   0   1  14  264.07   31.40
   0  -1  14  255.57   28.80
   0  -1 -14  296.37   17.30
   0  -1 -14  243.28   22.00
   0  -1 -14  262.47   22.70
   0  -1  14  284.57   19.50
   0   1 -15  121.99   17.40
   0  -1 -15  104.19   13.10
   0  -1  15  133.49   24.70
   0   1 -16   58.89   12.60
   0   1  16   54.59   16.70
   0  -1  16   66.69   16.10
   0  -1 -16   62.89   13.10
   0  -1 -16   53.99    8.20
   0   1 -17    5.20    9.10
   0   1  17   -3.20   11.90
   0  -1 -17    7.90    8.60
   0  -1 -17    3.20    5.50
   0  -1  17    9.60   10.30
   0   1  18   19.40   12.90
   0   1 -18   -1.90    8.70
   0  -1  18   15.50   12.40
   0  -1 -18   14.50   10.30
   0  -1 -18   20.70    6.50
   0   1  19   10.80   12.80
   0   1 -19    0.50   10.20
   0  -1 -19   12.70   10.30
   0  -1  19   16.50   12.80
   0   2   0 1784.62   57.09
   0   2   0 1767.32   55.79
   0  -2   0 1870.51   56.19
   0  -2   0 1753.62   55.89
   0   2  -1   49.60    3.20
   0   2   1   49.40    3.70
   0   2   1   58.69    4.70
   0   2  -1   54.29    4.30
   0  -2   1   57.09    3.80
   0  -2   1   50.29    3.30
   0  -2  -1   55.49    3.80
   0  -2  -1   47.40    3.30
   0   2   2   13.70    2.30
   0   2  -2   10.20    3.30
   0   2   2   12.80    2.40
   0   2   2   17.20    2.80
   0   2  -2   18.10    2.90
   0  -2  -2   15.20    2.70
   0  -2   2   13.20    2.20
   0  -2   2   13.90    2.20
   0  -2   2   14.40    2.40
   0  -2  -2   14.50    2.50
   0  -2  -2   12.80    2.20
   0   2  -3    4.80    2.00
   0   2   3    5.90    1.90
   0   2  -3    9.10    2.40
   0   2   3    5.10    2.20
   0   2   3    6.80    2.10
   0   2  -3    5.30    4.00
   0  -2   3    4.30    1.90
   0  -2  -3    6.60    2.30
   0  -2   3    5.50    2.20
   0  -2  -3    6.70    2.40
   0  -2  -3    4.10    2.10
   0   2  -4 1918.11   63.09
   0   2  -4 1851.81   62.59
   0   2  -4 2094.49   71.49
   0   2   4 1941.21   63.49
   0   2   4 2119.99   65.99
   0  -2   4 1988.90   66.89
   0  -2  -4 1854.41   62.59
   0  -2   4 2033.50   63.49
   0  -2  -4 1892.91   63.69
   0  -2  -4 1873.91   63.09
   0   2   5   96.49    6.90
   0   2  -5   84.79    7.30
   0   2  -5   83.59    6.70
   0   2   5   91.39    7.20
   0   2   5   91.39    7.80
   0  -2   5   95.09    7.50
   0  -2   5   78.29   10.20
   0  -2  -5   95.59    7.80
   0  -2  -5   91.59    7.40
   0  -2  -5   91.19    7.00
   0   2  -6   60.39    7.00
   0   2   6   68.99    6.60
   0   2   6   82.79    9.10
   0   2   6   67.79    6.90
   0  -2   6   66.59    7.30
   0  -2  -6   66.29    7.40
   0  -2  -6   64.69    6.80
   0  -2   6   58.19   10.50
   0  -2  -6   70.39    7.40
   0   2   7   74.29   11.70
   0   2   7   64.79    7.60
   0   2   7   60.79    7.10
   0   2  -7   39.40    6.60
   0  -2  -7   65.19    8.60
   0  -2  -7   57.59    7.50
   0  -2   7   55.09    7.50
   0  -2   7   54.79    9.50
   0  -2  -7   55.09    8.30
   0   2   8   58.49    8.00
   0   2   8   65.49    8.10
   0   2  -8   80.59   16.00
   0   2  -8   69.29    8.90
   0  -2  -8   54.89    8.90
   0  -2  -8   73.59    8.60
   0  -2  -8   50.99    7.40
   0  -2   8   61.39    8.50
   0  -2   8   47.40   10.70
   0   2   9  291.57   16.50
   0   2  -9  273.77   17.20
   0   2   9  278.77   16.30
   0  -2  -9  309.27   18.30
   0  -2   9  270.97   22.00
   0  -2  -9  309.27   18.00
   0  -2   9  292.77   15.60
   0  -2   9  258.27   16.80
   0  -2  -9  299.57   17.10
   0   2 -10  160.88   14.10
   0   2  10  170.98   13.10
   0   2  10  183.78   13.40
   0  -2  10  172.08   12.30
   0  -2 -10  170.88   14.80
   0  -2 -10  198.58   14.40
   0  -2  10  166.98   14.80
   0  -2 -10  189.88   16.10
   0  -2  10  181.88   18.30
   0   2  11  184.28   19.90
   0   2 -11  198.58   16.00
   0   2  11  202.48   14.60
   0  -2 -11  196.28   16.20
   0  -2  11  193.78   20.70
   0  -2  11  213.98   14.00
   0  -2 -11  203.98   16.90
   0  -2  11  193.68   15.10
   0   2  12   -1.00    4.80
   0   2 -12    2.90    5.80
   0   2  12   -6.50    7.60
   0   2 -12  -16.40    9.40
   0  -2  12    3.70    4.20
   0  -2 -12   -2.80    6.20
   0  -2 -12   -4.50    5.10
   0  -2  12   -1.40    7.20
   0   2  13  147.29   23.20
   0   2  13  149.79   16.00
   0   2 -13  155.88   16.80
   0  -2 -13  144.89   13.80
   0  -2 -13  129.99   17.50
   0  -2 -13  114.89   19.50
   0  -2  13  136.39   22.00
   0  -2  13  158.68   14.20
   0   2 -14   -7.60    6.50
   0  -2 -14   -2.00    5.40
   0  -2 -14   -2.10    6.30
   0  -2 -14  -14.00    7.20
   0  -2  14   -2.20    6.00
   0  -2  14   -7.00   10.60
   0   2  15  745.33   47.50
   0   2 -15  750.72   39.30
   0  -2  15  761.42   36.00
   0  -2  15  769.32   47.30
   0  -2 -15  838.82   35.10
   0  -2 -15  767.02   39.10
   0  -2 -15  761.32   41.40
   0   2 -16   -3.90    7.70
   0   2  16   -2.40   14.30
   0  -2 -16    9.10    9.90
   0  -2 -16   -5.30    5.40
   0  -2  16    3.20   11.00
   0   2  17  192.18   29.70
   0   2 -17  201.18   22.10
   0  -2  17  174.28   25.60
   0  -2 -17  189.78   30.50
   0  -2 -17  204.98   17.50
   0   2  18  -12.90   12.70
   0   2 -18   13.70   10.20
   0  -2 -18   11.90    9.90
   0  -2 -18   12.60    7.30
   0  -2  18   18.50   10.80
   0   2 -19   15.60   11.00
   0   2  19   23.40   15.80
   0  -2 -19   27.10   13.50
   0  -2 -19   30.70    8.80
   0  -2  19   30.40   15.30
   0   3   0   -1.40    1.50
   0   3   0    1.30    1.50
   0  -3   0    0.10    1.50
   0  -3   0   -0.70    1.50
   0   3  -1   57.29    4.80
   0   3   1   53.09    4.80
   0   3  -1   53.69    4.20
   0   3   1   59.39    5.20
   0  -3   1   57.59    4.70
   0  -3   1   58.49    5.00
   0  -3  -1   55.89    5.20
   0  -3  -1   54.49    4.30
   0  -3  -1   61.99    4.90
   0   3   2   73.69    6.00
   0   3  -2   70.59    4.80
   0   3   2   81.89    6.30
   0   3  -2   82.49    5.80
   0   3   2   73.39    5.20
   0  -3  -2   70.29    5.30
   0  -3   2   63.19    7.00
   0  -3  -2   90.29    7.00
   0  -3   2   83.49    5.90
   0  -3  -2   74.19    6.40
   0   3   3 1466.65   47.70
   0   3  -3 1445.96   52.19
   0   3   3 1485.75   49.00
   0   3   3 1408.26   48.50
   0   3  -3 1499.45   48.10
   0  -3  -3 1399.26   47.90
   0  -3   3 1464.75   48.20
   0  -3  -3 1414.86   49.20
   0  -3  -3 1521.25   48.70
   0  -3   3 1487.95   47.70
   0  -3   3 1542.55   49.10
   0   3  -4   40.50    5.00
   0   3   4   38.40    4.60
   0   3  -4   37.00    6.70
   0   3   4   42.50    5.60
   0   3   4   47.10    5.50
   0  -3  -4   37.50    5.30
   0  -3  -4   43.30    6.30
   0  -3   4   45.60    6.40
   0  -3  -4   52.39    5.70
   0  -3   4   31.30    6.40
   0  -3   4   46.40    5.20
   0   3  -5   23.40    6.50
   0   3  -5   20.10    3.70
   0   3   5   13.90    3.10
   0   3  -5   16.30    3.30
   0   3   5   25.30    5.20
   0   3   5   21.70    3.80
   0  -3   5   15.90    3.90
   0  -3   5   14.10    5.20
   0  -3  -5   16.30    3.70
   0  -3  -5   20.30    3.80
   0  -3  -5   15.00    3.60
   0   3  -6  297.47   14.80
   0   3   6  307.67   15.50
   0   3   6  292.17   15.20
   0   3  -6  304.37   15.30
   0   3   6  277.47   14.30
   0  -3  -6  321.67   15.50
   0  -3   6  310.57   15.50
   0  -3  -6  294.97   15.30
   0  -3  -6  313.17   16.60
   0  -3   6  296.57   19.50
   0  -3  -6  290.97   15.70
   0   3   7    6.30    2.90
   0   3   7    6.00    4.70
   0   3  -7    2.30    6.10
   0   3  -7    4.20    3.10
   0   3  -7    5.90    4.10
   0   3   7    1.30    3.00
   0  -3  -7   -2.50    3.30
   0  -3  -7    2.70    3.30
   0  -3   7    0.80    3.80
   0  -3  -7    2.70    3.80
   0   3  -8   -2.70    6.10
   0   3  -8   -3.40    3.60
   0   3   8    8.80    5.50
   0   3  -8    1.40    3.00
   0   3   8   -1.80    2.80
   0  -3   8   -5.10    3.60
   0  -3  -8   -3.10    4.00
   0  -3  -8    0.20    2.70
   0  -3  -8   -6.00    3.30
   0   3  -9   -5.20    5.00
   0   3   9    5.20    3.40
   0   3   9   -0.50    3.20
   0   3   9    7.00    6.30
   0   3  -9   -1.90    4.20
   0   3  -9    0.40    3.60
   0  -3   9   -1.00    5.90
   0  -3  -9    3.50    3.60
   0  -3  -9    3.80    4.70
   0  -3   9   -3.80    3.90
   0  -3  -9   -1.40    4.60
   0   3  10  232.28   14.60
   0   3 -10  227.98   16.70
   0   3 -10  213.08   15.50
   0   3  10  164.28   20.60
   0  -3  10  233.38   13.90
   0  -3 -10  207.38   22.80
   0  -3  10  234.98   16.30
   0  -3 -10  213.68   15.80
   0  -3  10  228.98   20.70
   0  -3 -10  227.58   17.40
   0   3 -11    4.10    8.00
   0   3  11    7.20    8.30
   0   3 -11    8.60    6.10
   0   3 -11   20.20    6.90
   0   3  11    2.00    5.10
   0   3  11    2.80    4.70
   0  -3  11    6.00    8.20
   0  -3 -11    7.60    6.70
   0  -3  11   11.60    4.40
   0  -3 -11   12.90    6.60
   0  -3  11   17.60    6.40
   0  -3 -11    2.70    5.70
   0   3 -12  277.87   20.90
   0   3 -12  352.46   22.20
   0   3  12  319.77   20.80
   0  -3 -12  304.57   23.20
   0  -3  12  325.87   27.70
   0  -3  12  347.17   18.80
   0  -3 -12  312.97   21.00
   0   3 -13   26.30    8.20
   0   3 -13   15.10    7.80
   0   3  13    9.80    9.60
   0  -3 -13    7.30    8.70
   0  -3  13   10.30   10.90
   0  -3 -13   11.70    7.20
   0  -3  13   16.30    6.00
   0   3 -14  105.99   16.00
   0   3  14  124.19   26.60
   0   3 -14  136.29   16.70
   0  -3  14  124.19   14.80
   0  -3 -14  126.29   15.60
   0  -3 -14   97.59   15.40
   0   3 -15   17.60    7.20
   0   3 -15   16.70    8.00
   0  -3 -15    9.90    6.80
   0  -3  15    3.20   11.80
   0  -3 -15   -1.60    8.80
   0  -3  15    3.70    5.90
   0  -3 -15   14.90    7.70
   0   3 -16   43.30   11.80
   0   3  16   52.69   18.60
   0   3 -16   34.50    9.80
   0  -3  16   46.70   15.00
   0  -3 -16   40.30   11.40
   0  -3 -16   46.50   13.20
   0  -3  16   52.79    9.30
   0   3 -17   -1.70   10.40
   0   3  17   -9.20   14.00
   0   3 -17   -4.60    7.90
   0  -3  17   -2.00   11.00
   0  -3 -17  -10.30   14.70
   0  -3 -17   -2.80    7.40
   0   3 -18  293.87   27.30
   0   3  18  278.67   37.50
   0   3 -18  298.97   26.90
   0  -3 -18  310.37   29.40
   0  -3 -18  327.37   23.40
   0  -3  18  250.47   34.30
   0   3  19   26.00   16.50
   0   3 -19   30.60   11.90
   0   3 -19   40.30   13.60
   0  -3 -19   37.30   13.70
   0  -3  19   16.30   14.10
   0  -3 -19   13.70    8.90
   0   4   0 2438.16   76.59
   0   4   0 2400.76   76.39
   0  -4   0 2413.16   76.49
   0  -4   0 2342.47   76.19
   0   4   1    0.60    1.80
   0   4  -1    0.40    2.00
   0   4  -1   -0.90    1.30
   0   4   1   -1.50    2.20
   0  -4  -1    0.90    1.90
   0  -4   1    3.10    1.90
   0  -4  -1    0.00    2.00
   0  -4   1   -0.10    1.90
   0   4  -2 1556.14   51.19
   0   4  -2 1490.75   50.09
   0   4   2 1529.15   51.49
   0   4   2 1601.94   52.49
   0   4  -2 1518.75   55.09
   0  -4  -2 1553.34   50.69
   0  -4   2 1585.94   51.79
   0  -4  -2 1631.34   51.79
   0  -4  -2 1564.74   52.39
   0  -4   2 1556.94   50.29
   0   4  -3  475.15   18.40
   0   4   3  446.86   17.80
   0   4  -3  401.36   21.80
   0   4   3  431.36   18.70
   0   4   3  447.76   19.30
   0  -4  -3  460.75   18.30
   0  -4  -3  462.75   18.70
   0  -4  -3  462.15   19.90
   0  -4   3  494.45   19.20
   0  -4   3  460.55   17.10
   0   4   4  361.76   17.50
   0   4  -4  391.76   16.60
   0   4   4  377.56   16.00
   0   4  -4  376.26   21.10
   0   4   4  351.56   16.70
   0   4   4  390.36   17.20
   0  -4  -4  393.76   18.30
   0  -4   4  348.97   14.50
   0  -4   4  392.36   16.90
   0  -4  -4  389.06   17.10
   0  -4   4  388.06   17.00
   0  -4  -4  377.66   16.60
   0   4   5  198.58   11.30
   0   4   5  204.58   12.20
   0   4   5  198.48   12.50
   0   4  -5  207.28   11.80
   0   4  -5  209.78   17.40
   0  -4   5  222.48   12.20
   0  -4  -5  191.88   13.50
   0  -4   5  183.28    9.70
   0  -4  -5  209.08   12.30
   0  -4   5  194.48   12.00
   0  -4  -5  199.38   12.20
   0   4  -6  511.15   21.20
   0   4   6  452.25   20.50
   0   4   6  504.55   22.10
   0   4   6  470.85   21.60
   0   4  -6  460.05   28.20
   0  -4   6  480.95   27.10
   0  -4  -6  500.05   21.80
   0  -4  -6  485.25   23.30
   0  -4   6  496.95   21.60
   0  -4  -6  475.15   22.20
   0   4   7    2.20    3.70
   0   4  -7    2.90    3.80
   0   4   7    1.30    4.00
   0   4  -7    5.10    3.40
   0   4   7    3.00    2.70
   0   4  -7   -2.90    7.30
   0  -4   7    3.90    3.50
   0  -4  -7   -1.10    3.90
   0  -4  -7    3.60    4.00
   0  -4  -7   -1.10    3.80
   0   4   8  198.58   12.40
   0   4  -8  192.58   13.60
   0   4   8  189.28   13.90
   0   4   8  191.58   13.30
   0   4  -8  173.48   12.40
   0  -4   8  167.58   13.40
   0  -4  -8  180.18   14.50
   0  -4  -8  172.78   12.30
   0  -4  -8  205.68   13.40
   0  -4   8  139.89   17.70
   0  -4  -8  176.38   14.00
   0   4  -9  336.17   18.50
   0   4   9  327.57   21.10
   0   4   9  342.07   20.50
   0   4  -9  313.47   18.90
   0   4   9  305.27   23.30
   0  -4   9  324.97   19.20
   0  -4   9  314.87   24.60
   0  -4  -9  320.07   20.60
   0  -4  -9  314.77   20.10
   0  -4  -9  367.66   19.90
   0  -4  -9  328.07   18.30
   0   4  10  108.39   16.40
   0   4  10  118.09   11.30
   0   4  10  123.09   12.10
   0   4 -10   91.99   15.60
   0   4 -10   94.99   11.90
   0  -4 -10   96.09   12.10
   0  -4  10   97.39   12.20
   0  -4  10  127.19   18.10
   0  -4 -10  110.79   14.10
   0  -4 -10   89.59   11.60
   0  -4 -10  105.19   13.40
   0   4  11  364.76   22.60
   0   4 -11  379.86   23.50
   0   4 -11  368.66   22.70
   0  -4 -11  385.06   25.30
   0  -4  11  372.16   28.60
   0  -4  11  389.06   23.20
   0  -4 -11  357.66   24.10
   0  -4 -11  389.96   22.10
   0   4 -12  185.18   17.00
   0   4 -12  194.68   17.70
   0  -4  12  191.88   14.60
   0  -4  12  204.58   24.30
   0  -4 -12  167.28   16.50
   0  -4 -12  178.68   18.90
   0  -4 -12  181.68   19.80
   0   4 -13  174.68   17.20
   0   4 -13  142.89   17.20
   0  -4 -13  142.79   15.50
   0  -4  13  158.98   13.70
   0  -4 -13  141.89   19.10
   0  -4  13  126.69   22.10
   0  -4 -13  116.89   17.90
   0   4  14   -1.50   10.00
   0   4 -14   -0.20    7.50
   0   4 -14   -4.60    5.60
   0  -4  14    0.60    6.20
   0  -4  14   -7.30    9.40
   0  -4 -14   -6.00    7.00
   0  -4 -14   -4.50    6.20
   0   4 -15    6.40    7.80
   0   4 -15    6.50    7.00
   0  -4  15   -5.40   11.00
   0  -4 -15   13.80    7.30
   0  -4 -15    0.50    8.60
   0  -4  15    7.00    7.60
   0   4 -16    1.00    7.30
   0   4  16   25.10   13.60
   0   4 -16   -5.60    8.90
   0  -4 -16    5.40    9.50
   0  -4  16    1.30   10.50
   0  -4 -16    8.40    7.80
   0  -4  16    4.40    7.00
   0   4 -17   39.60   18.00
   0   4 -17   49.40   11.30
   0   4  17   50.59   19.50
   0  -4 -17   38.20   10.80
   0  -4  17   65.79   12.30
   0  -4  17   50.79   16.20
   0  -4 -17   52.49   14.30
   0   4  18   16.00   19.10
   0   4 -18   35.60   11.80
   0   4 -18   36.00   11.80
   0  -4 -18   34.30   10.80
   0  -4 -18   42.00   12.70
   0   4 -19   49.60   12.80
   0   4  19   25.10   18.50
   0   4 -19   23.80   11.50
   0  -4 -19   33.70   11.30
   0  -4 -19   31.00   13.90
   0   5   0   -4.50    2.10
   0  -5   0   -2.40    2.20
   0  -5   0   -3.40    2.10
   0   5  -1 1233.28   41.70
   0   5  -1 1252.27   42.50
   0   5   1 1223.88   42.20
   0   5   1 1232.98   43.20
   0  -5   1 1201.68   41.90
   0  -5   1 1242.38   42.80
   0  -5  -1 1249.97   42.60
   0  -5  -1 1234.48   43.20
   0   5  -2   20.80    4.10
   0   5   2   23.10    4.80
   0   5  -2   20.20    3.50
   0  -5   2   21.10    4.30
   0  -5  -2   25.20    4.60
   0  -5  -2   28.60    4.50
   0  -5   2   19.60    3.80
   0  -5  -2   18.30    3.80
   0   5   3 4243.38  133.69
   0   5  -3 4244.98  136.39
   0   5  -3 4154.58  137.29
   0   5  -3 4223.28  131.59
   0   5   3 4079.69  132.09
   0  -5   3 4358.06  132.99
   0  -5  -3 4125.59  133.59
   0  -5  -3 4189.08  131.39
   0  -5   3 4089.39  130.19
   0  -5  -3 4265.87  132.29
   0   5  -4   75.49    8.10
   0   5   4   74.19    7.50
   0   5   4   83.39    8.70
   0   5  -4   72.39   11.80
   0   5   4   70.29    9.10
   0  -5  -4   93.29   10.20
   0  -5   4   77.29    8.40
   0  -5   4   62.39    6.80
   0  -5  -4   82.19    8.50
   0  -5   4   72.29    8.70
   0  -5  -4   61.69    8.30
   0   5  -5 1323.87   45.70
   0   5   5 1280.77   46.60
   0   5   5 1294.37   45.20
   0   5   5 1282.37   46.70
   0   5  -5 1312.27   53.39
   0  -5  -5 1333.97   46.60
   0  -5   5 1300.47   43.40
   0  -5  -5 1295.37   46.20
   0  -5   5 1341.77   46.90
   0  -5  -5 1269.27   48.30
   0  -5   5 1295.57   46.40
   0   5   6   94.19    9.10
   0   5  -6  104.69   16.00
   0   5   6   94.69   10.30
   0   5  -6  124.69    9.70
   0   5   6  108.49   10.20
   0  -5  -6  101.29   10.70
   0  -5   6  103.19    9.80
   0  -5   6   95.59    9.80
   0  -5  -6   96.19    9.70
   0  -5   6   92.99    7.30
   0  -5  -6  101.79   12.00
   0   5  -7   40.00   11.00
   0   5   7   55.69    7.90
   0   5  -7   65.99    8.50
   0   5   7   70.29    8.80
   0   5   7   60.79    8.90
   0  -5  -7   50.59    8.00
   0  -5  -7   67.89    8.90
   0  -5  -7   64.19   10.30
   0  -5   7   57.29    8.40
   0  -5   7   67.89    6.40
   0   5  -8    3.70    3.70
   0   5   8    2.50    4.30
   0   5   8   -3.60    3.40
   0   5   8    2.10    3.00
   0  -5  -8   -6.10    3.90
   0  -5  -8   -7.40    4.00
   0  -5  -8   -5.10    4.30
   0  -5   8   -2.30    4.00
   0   5  -9  573.64   25.70
   0   5   9  559.54   26.50
   0   5   9  536.25   24.40
   0   5   9  483.75   25.10
   0  -5  -9  510.95   25.40
   0  -5  -9  492.85   30.60
   0  -5  -9  514.95   28.10
   0  -5   9  466.55   31.90
   0   5  10   77.19   11.60
   0   5  10   44.40    9.00
   0   5 -10   36.90   11.30
   0   5  10   64.39    9.80
   0  -5 -10   47.90    9.50
   0  -5 -10   47.30    9.20
   0  -5  10   48.70    9.40
   0  -5 -10   54.69   10.30
   0   5 -11  366.66   22.50
   0   5 -11  445.16   26.90
   0   5  11  381.76   26.40
   0  -5 -11  346.37   25.70
   0  -5 -11  367.16   24.90
   0  -5  11  372.56   28.70
   0   5  12   61.39   14.00
   0   5 -12  116.99   15.30
   0   5 -12  109.19   14.80
   0  -5 -12   79.89   13.00
   0  -5 -12  139.49   17.30
   0   5 -13   12.30    8.50
   0   5  13    9.10   11.50
   0   5 -13   18.20    7.90
   0  -5 -13    3.40    8.60
   0  -5 -13    9.90    6.60
   0  -5  13   30.60    7.20
   0  -5 -13   17.00    8.40
   0   5 -14    1.80    6.40
   0   5 -14    8.80    8.10
   0  -5 -14   -3.30    9.30
   0  -5 -14   -2.80    8.70
   0  -5  14    0.10    5.80
   0  -5 -14    2.60    7.10
   0   5 -15   31.30    9.40
   0   5  15   27.50   12.80
   0   5 -15   22.70   10.80
   0  -5 -15   18.30    9.80
   0  -5  15   30.90   10.10
   0   5 -16   -0.40    8.20
   0   5  16   22.10   13.10
   0   5 -16    2.30    9.40
   0  -5 -16    9.90    9.70
   0  -5  16   15.80    7.50
   0   5  17   29.20   16.70
   0   5 -17   27.40    9.50
   0   5 -17   33.30   13.20
   0  -5  17   42.00    9.30
   0  -5 -17   23.60    9.70
   0  -5 -17   30.20   12.40
   0   5  18    0.40   17.20
   0   5 -18   16.00   10.30
   0  -5 -18   22.10   12.40
   0  -5 -18    0.20    9.20
   0   6   0  159.58   10.10
   0   6   0  156.98   11.40
   0  -6   0  146.09   11.10
   0  -6   0  139.69   10.60
   0   6  -1   29.00    4.50
   0   6  -1   29.30    5.70
   0   6   1   32.80    6.00
   0   6   1   49.80    7.10
   0  -6   1   27.40    5.70
   0  -6  -1   22.90    5.20
   0  -6  -1   36.30    5.70
   0  -6   1   27.00    5.10
   0   6  -2   16.80    4.90
   0   6   2   23.70    5.80
   0   6  -2   16.40    3.90
   0  -6  -2   24.10    5.30
   0  -6   2   18.60    5.60
   0  -6  -2   23.20    5.10
   0  -6  -2   14.90    4.50
   0  -6   2   10.80    4.40
   0   6  -3  481.75   20.70
   0   6  -3  431.36   19.30
   0   6  -3  443.76   27.00
   0   6   3  457.25   22.40
   0   6   3  485.75   21.10
   0  -6  -3  482.95   21.10
   0  -6  -3  477.25   22.80
   0  -6   3  480.35   21.80
   0  -6   3  469.05   19.80
   0  -6  -3  463.55   20.50
   0   6   4  221.28   13.90
   0   6  -4  234.68   18.90
   0   6   4  232.98   15.70
   0   6  -4  230.58   13.70
   0  -6  -4  231.58   15.90
   0  -6  -4  215.28   13.60
   0  -6   4  238.18   14.60
   0  -6  -4  224.98   13.90
   0  -6   4  237.08   12.30
   0   6  -5  237.98   13.80
   0   6  -5  243.08   19.90
   0   6   5  225.48   14.40
   0   6   5  214.48   13.10
   0   6   5  203.08   15.30
   0  -6   5  241.48   12.30
   0  -6   5  244.28   14.60
   0  -6  -5  226.08   14.50
   0  -6   5  239.28   14.50
   0  -6  -5  219.58   16.20
   0  -6  -5  225.38   14.10
   0   6   6   22.30    5.20
   0   6  -6   24.30    4.90
   0   6  -6   17.90    8.70
   0   6   6   14.70    5.60
   0   6   6   19.50    4.50
   0  -6   6   18.20    4.90
   0  -6  -6    6.60    5.20
   0  -6   6   22.30    5.60
   0  -6  -6    7.30    4.90
   0  -6  -6   12.00    5.10
   0   6   7   23.00    5.30
   0   6   7   44.40    9.10
   0   6  -7   15.90    9.10
   0   6   7   29.80    5.20
   0   6  -7   30.00    6.00
   0  -6   7   23.40    5.90
   0  -6  -7   33.00   11.50
   0  -6   7   32.50    7.00
   0  -6  -7   29.60    6.80
   0  -6  -7   28.40    6.30
   0  -6   7   41.40    5.90
   0   6   8    7.60    5.20
   0   6   8   13.40    5.20
   0   6  -8    8.70    5.00
   0   6  -8  -11.20    8.00
   0   6   8   13.10    5.30
   0  -6   8   12.40    5.30
   0  -6   8    7.60    3.30
   0  -6  -8    5.80    5.50
   0  -6  -8   13.60    5.70
   0  -6  -8    6.00    5.30
   0   6  -9  944.61   47.90
   0   6   9  984.70   39.90
   0   6   9  911.51   38.20
   0  -6   9  947.71   34.70
   0  -6   9  931.91   40.40
   0  -6  -9  978.90   43.60
   0  -6  -9 1027.10   42.40
   0   6 -10   22.20    7.60
   0   6  10   33.70    7.90
   0  -6 -10   45.50    9.70
   0  -6 -10   28.60    9.10
   0  -6  10   40.20    9.90
   0   6  11  639.24   32.90
   0   6 -11  630.74   30.90
   0  -6 -11  648.24   34.50
   0  -6 -11  613.44   35.70
   0   6 -12  189.78   16.80
   0   6  12  169.78   22.70
   0  -6 -12  181.28   20.50
   0  -6 -12  173.58   19.00
   0   6 -13    5.50    6.90
   0  -6 -13   -6.20    7.50
   0  -6 -13   -1.60    8.20
   0   6 -14    7.30    7.00
   0   6  14   -3.80   11.60
   0  -6  14   -3.20    5.70
   0  -6 -14  -11.10    7.90
   0  -6 -14   -0.90    7.40
   0   6 -15  225.78   20.40
   0  -6 -15  189.08   24.20
   0  -6 -15  221.08   24.40
   0  -6  15  235.38   19.10
   0   6  16    6.20   11.50
   0   6 -16   -3.00    7.40
   0  -6 -16    7.30   15.30
   0  -6  16    6.10    8.80
   0   6  17  147.89   28.30
   0   6 -17  201.88   22.30
   0  -6 -17  198.48   26.30
   0  -6  17  242.58   20.30
   0   6 -18    5.60    9.50
   0   6  18   11.80   17.60
   0  -6 -18    6.80    9.50
   0  -6 -18    4.20   13.10
   0   7   0    1.30    4.00
   0   7   0    4.10    3.20
   0  -7   0    5.10    4.30
   0  -7   0   -0.60    3.90
   0   7   1   11.30    4.10
   0   7  -1   16.10    5.00
   0   7  -1    9.50    3.40
   0   7   1   10.20    5.40
   0  -7  -1   12.20    4.50
   0  -7   1   10.20    4.80
   0  -7  -1    6.30    4.80
   0  -7   1   11.40    4.40
   0   7   2    5.70    5.10
   0   7   2   15.40    3.70
   0   7  -2    9.50    4.30
   0   7  -2   15.20    4.00
   0  -7  -2    7.70    4.20
   0  -7  -2   13.70    4.40
   0  -7   2    8.30    4.70
   0  -7  -2   17.20    4.90
   0  -7   2    6.00    3.90
   0   7  -3  490.15   27.90
   0   7   3  480.95   24.50
   0   7   3  514.55   23.00
   0   7  -3  484.25   21.20
   0   7  -3  507.15   22.40
   0  -7   3  513.75   21.90
   0  -7  -3  554.84   25.50
   0  -7  -3  512.25   23.00
   0  -7  -3  523.95   22.40
   0  -7   3  503.55   23.50
   0   7  -4   21.90    4.80
   0   7  -4   19.80    6.60
   0   7   4   15.30    5.10
   0   7   4   15.90    5.00
   0  -7  -4   15.60    4.90
   0  -7  -4    8.70    5.00
   0  -7   4   15.60    5.00
   0  -7   4   14.80    4.20
   0  -7  -4   10.20    5.50
   0   7   5  482.15   26.50
   0   7  -5  466.85   29.00
   0   7  -5  451.45   21.50
   0  -7  -5  443.56   22.00
   0  -7   5  453.45   22.60
   0  -7  -5  442.66   24.70
   0  -7   5  478.45   20.20
   0  -7   5  463.75   23.10
   0  -7  -5  506.85   22.50
   0   7   6  117.29   11.90
   0   7  -6  132.99   11.80
   0   7  -6  147.69   18.40
   0   7   6  140.99   13.30
   0  -7   6  122.79   12.20
   0  -7  -6  103.29   11.10
   0  -7   6  143.49   13.50
   0  -7  -6  142.79   14.70
   0  -7   6  145.79   10.00
   0  -7  -6  129.49   12.10
   0   7  -7   35.40    7.30
   0   7   7   55.59   10.70
   0   7  -7   29.90   11.20
   0   7   7   46.50   10.70
   0   7   7   49.70    7.80
   0  -7  -7   42.30    8.00
   0  -7  -7   43.90    7.90
   0  -7   7   35.10    5.40
   0  -7   7   37.10    8.20
   0  -7  -7   43.00    8.40
   0  -7   7   39.80    7.90
   0   7   8   29.40    6.50
   0   7  -8   32.00    7.50
   0  -7   8   42.80    7.80
   0  -7  -8   37.70    9.30
   0  -7  -8   26.50    7.90
   0  -7   8   22.80   12.50
   0  -7   8   27.50    5.40
   0   7  -9    3.80    6.30
   0   7   9   19.40    6.10
   0   7   9   17.10    5.20
   0  -7   9   19.20    4.40
   0  -7   9   14.80    7.60
   0  -7  -9   14.70    8.40
   0  -7  -9   19.40    8.10
   0   7 -10  125.89   14.70
   0   7  10  151.38   15.30
   0  -7  10  132.69   18.00
   0  -7 -10  128.29   19.00
   0  -7 -10  153.78   17.60
   0  -7  10  151.58   11.40
   0   7  11   47.80   11.20
   0   7 -11  100.29   14.00
   0  -7 -11   74.69   12.70
   0  -7 -11   54.49   11.80
   0  -7  11   68.09    9.60
   0   7 -12  359.66   22.50
   0   7  12  323.37   26.70
   0  -7  12  360.76   18.40
   0  -7 -12  386.86   29.30
   0  -7 -12  358.96   27.00
   0   7 -13   10.80    7.30
   0  -7  13    2.40    4.80
   0  -7 -13   -8.60    7.40
   0   7  14   63.39   17.00
   0   7 -14   98.09   16.10
   0  -7 -14   91.29   15.60
   0  -7  14  113.49   11.50
   0  -7 -14   86.99   15.70
   0   7 -15   -8.90    7.10
   0   7  15  -14.70   12.20
   0  -7 -15   -6.50    8.70
   0  -7 -15  -10.90    9.10
   0   7  16   23.60   12.70
   0   7 -16   32.60   11.30
   0  -7 -16   41.60   14.10
   0  -7 -16   55.59   13.10
   0   7  17   15.00   13.70
   0  -7 -17   14.60   12.60
   0  -7  17   28.90   10.10
   0   8   0  166.08   13.10
   0   8   0  154.98   11.50
   0  -8   0  119.79   15.90
   0  -8   0  164.98   13.60
   0   8   1   17.90    6.30
   0   8  -1   26.20    4.90
   0   8  -1   16.80    5.40
   0   8   1   18.00    4.50
   0  -8  -1   15.60    5.70
   0  -8   1   17.50    5.50
   0  -8  -1   21.30    4.90
   0  -8  -1   13.00    4.70
   0   8   2   62.39    8.60
   0   8   2   41.60    9.00
   0   8  -2   59.59    8.90
   0   8  -2   59.19    7.60
   0   8  -2   63.99   12.60
   0  -8  -2   64.59    8.30
   0  -8   2   37.50   10.90
   0  -8  -2   49.00    8.30
   0  -8  -2   49.70    8.50
   0  -8   2   62.39    9.00
   0   8  -3    6.10    5.90
   0   8   3   -5.60    3.60
   0   8  -3    1.50    3.20
   0   8   3   -2.80    6.00
   0   8  -3    3.10    3.90
   0  -8   3   -4.40    4.50
   0  -8  -3   -7.90    4.70
   0  -8  -3    5.70    4.30
   0  -8   3   -4.50    3.90
   0  -8  -3   -2.70    3.40
   0   8  -4  165.68   17.40
   0   8   4  165.78   12.80
   0   8   4  150.48   14.40
   0   8  -4  158.18   12.80
   0  -8  -4  161.28   17.40
   0  -8   4  125.49   13.00
   0  -8   4  151.58   12.30
   0  -8  -4  155.28   12.50
   0  -8  -4  179.68   12.70
   0   8   5   13.60    6.80
   0   8  -5   31.60    8.50
   0   8   5   23.70    5.80
   0   8  -5   19.00    9.60
   0  -8  -5   19.30    6.80
   0  -8   5   20.40    6.30
   0  -8   5   15.90    4.70
   0  -8   5   17.10    5.50
   0  -8  -5   27.30    6.10
   0  -8  -5   26.20    6.00
   0   8   6   68.89   11.20
   0   8  -6   43.80    7.50
   0   8   6   49.60    9.10
   0  -8   6   45.80    7.90
   0  -8   6   50.29    9.00
   0  -8  -6   69.09   10.50
   0  -8  -6   53.89   10.10
   0  -8   6   54.59    8.30
   0   8  -7   -6.90    5.10
   0   8   7    5.90    5.30
   0  -8   7   -3.80    4.40
   0  -8  -7   -0.90    5.50
   0  -8   7   -5.00    3.60
   0  -8   7  -12.60    5.70
   0   8   8  -10.20    5.10
   0   8   8    0.20    5.20
   0  -8   8   -3.70    6.00
   0  -8   8   -2.70    3.40
   0  -8  -8  -10.00    5.70
   0  -8  -8   -2.20    6.00
   0  -8   8  -13.50    6.30
   0   8   9   41.70    9.30
   0   8  -9   49.30    9.10
   0  -8   9   35.90    6.70
   0  -8  -9   42.40    9.80
   0  -8   9   54.39    9.60
   0  -8  -9   45.80   11.20
   0   8  10   18.70    9.40
   0   8 -10   29.20    8.30
   0  -8 -10   22.80    9.20
   0  -8  10   20.10    5.50
   0  -8 -10   28.10   10.60
   0   8  11    2.60    8.50
   0   8 -11   21.20    7.10
   0  -8 -11   15.40    9.80
   0  -8 -11   18.00    9.80
   0  -8  11   12.10    5.20
   0   8 -12   20.90    7.30
   0  -8 -12    2.90    9.80
   0  -8  12   21.20    5.40
   0  -8 -12   19.80   10.00
   0   8 -13   30.50    9.20
   0   8  13   17.90   12.50
   0  -8 -13   35.40   11.80
   0  -8 -13   14.90    9.70
   0  -8  13   28.10    6.00
   0   8 -14    4.30    7.70
   0  -8  14    2.10    5.20
   0  -8 -14    7.60   13.50
   0  -8 -14   -4.70    9.30
   0   8 -15  117.39   17.30
   0  -8  15  102.19   15.70
   0  -8 -15   83.69   24.30
   0  -8  15   88.89   12.00
   0  -8 -15   67.39   15.50
   0   8  16   14.80   13.50
   0   8 -16   19.30   10.90
   0  -8 -16   -6.40   11.20
   0  -8 -16   -8.50   10.00
   0  -8  16    5.20    6.60
   0   8  17   36.40   14.60
   0   8 -17   24.60   11.00
   0  -8 -17   -0.20   14.00
   0  -8  17   14.30   10.60
   0   9   0    7.10    5.60
   0   9   0  -10.70    4.90
   0  -9   0   -2.90    5.40
   0  -9   0    4.20    4.70
   0   9  -1  119.99   11.40
   0   9  -1  121.59   12.70
   0   9   1  112.19   13.30
   0   9   1  104.89   11.60
   0  -9  -1  120.49   11.20
   0  -9   1  113.69   12.60
   0  -9  -1   90.39   14.10
   0  -9   1   95.99   13.10
   0  -9  -1  115.89   12.20
   0   9  -2   62.99    9.50
   0   9   2   79.19   12.50
   0   9  -2  108.29   15.40
   0   9  -2   81.99   11.20
   0   9   2   89.59   11.40
   0  -9  -2   86.69   11.70
   0  -9  -2   90.59   10.90
   0  -9   2   92.99   11.80
   0  -9  -2   52.59   10.20
   0   9  -3  250.57   21.70
   0   9   3  213.18   18.40
   0   9  -3  245.98   16.60
   0   9   3  219.48   16.10
   0   9  -3  231.88   15.00
   0  -9  -3  209.58   18.90
   0  -9   3  235.58   16.80
   0  -9   3  287.57   17.00
   0  -9  -3  246.38   16.20
   0   9  -4   40.40    6.50
   0   9   4   33.20    8.80
   0   9   4   47.00   10.30
   0   9  -4   49.70    8.50
   0  -9  -4   33.90    7.80
   0  -9  -4   27.90    9.10
   0  -9   4   45.10    8.20
   0  -9   4   63.39    9.90
   0   9   5   58.49   10.40
   0   9  -5   66.79   11.30
   0  -9   5   86.19   11.60
   0  -9   5   75.89   10.60
   0  -9  -5   44.20   10.70
   0  -9   5   91.19   13.10
   0  -9  -5   78.29   11.50
   0   9   6   26.40    8.50
   0   9  -6   32.70    7.60
   0  -9  -6   28.60    9.50
   0  -9  -6   24.10   12.30
   0  -9   6   34.10    6.80
   0  -9   6   30.00   12.40
   0   9   7   13.40    7.20
   0   9  -7    3.90    6.50
   0  -9   7   -4.40    6.80
   0  -9  -7    8.70    8.30
   0  -9  -7    5.40    7.80
   0  -9   7   11.90    5.50
   0   9  -8  185.08   16.10
   0   9   8  189.48   18.90
   0  -9   8  196.68   15.40
   0  -9   8  188.38   18.40
   0  -9  -8  154.38   19.70
   0  -9  -8  197.48   19.00
   0   9   9  187.88   20.50
   0   9  -9  230.28   18.20
   0  -9   9  227.08   15.60
   0  -9  -9  220.88   21.00
   0  -9  -9  190.68   22.80
   0   9 -10  147.09   15.80
   0   9  10  130.99   17.80
   0  -9 -10  155.38   21.80
   0  -9  10  149.09   13.10
   0  -9 -10  124.69   18.90
   0   9  11    3.70    8.90
   0   9 -11   31.80    8.30
   0  -9 -11   10.40   11.30
   0  -9  11   14.60    5.70
   0  -9 -11   19.20    9.60
   0   9 -12   -3.70    6.90
   0  -9 -12  -10.60    7.90
   0  -9 -12  -15.50    8.00
   0  -9  12   -7.90    4.80
   0   9  13    2.90   11.30
   0   9 -13   21.00    8.40
   0  -9  13   15.60    6.00
   0  -9 -13   11.10   10.60
   0   9 -14   41.00   10.30
   0  -9 -14   35.10   14.20
   0  -9  14   33.00    7.20
   0  -9 -14   21.10   11.40
   0   9 -15    5.40    9.20
   0  -9 -15   13.10   10.70
   0  -9 -15    8.00   12.20
   0  -9  15    9.30    6.50
   0   9 -16   27.90   10.40
   0   9  16    5.30   15.20
   0  -9 -16   35.00   15.30
   0  -9 -16   -0.10   11.90
   0  -9  16   24.20    7.60
   0  10   0 1450.05   55.49
   0  10   0 1419.56   57.09
   0 -10   0 1587.34   58.99
   0  10  -1  184.18   16.10
   0  10   1  155.08   15.60
   0  10  -1  141.99   14.10
   0 -10   1  174.58   25.40
   0 -10  -1  163.88   17.80
   0 -10  -1  168.38   14.90
   0  10   2  259.67   21.00
   0  10  -2  263.47   18.60
   0  10  -2  240.28   17.50
   0 -10  -2  266.97   18.10
   0 -10   2  268.77   20.30
   0 -10  -2  258.27   21.50
   0  10  -3   13.40    6.90
   0  10  -3   -9.10    8.70
   0  10   3    4.70    7.20
   0 -10  -3    4.40    6.90
   0 -10  -3   -2.80    7.20
   0 -10   3   -4.50    6.00
   0  10   4   72.29   11.80
   0  10  -4  102.39   14.00
   0  10  -4   90.59   11.70
   0 -10  -4   71.69   12.50
   0 -10  -4   83.59   13.50
   0 -10   4  101.19   13.70
   0  10   5   -0.10    7.80
   0  10  -5   31.00    8.00
   0 -10  -5   22.20    8.20
   0 -10  -5    9.80    8.00
   0 -10   5   14.50    6.90
   0 -10   5   11.40    8.90
   0  10   6  487.35   31.70
   0  10  -6  543.35   28.20
   0 -10   6  613.44   28.30
   0 -10   6  531.85   30.50
   0 -10  -6  537.05   34.50
   0 -10  -6  670.83   31.30
   0  10  -7   50.39    9.60
   0  10   7   49.90   11.80
   0 -10   7   42.30   11.00
   0 -10   7   34.40    8.10
   0 -10  -7   26.00    9.60
   0 -10  -7   49.10   11.90
   0  10   8   31.70   11.10
   0 -10  -8   24.50   10.30
   0 -10   8   31.50    7.20
   0 -10  -8   41.70   10.60
   0  10  -9   65.69   10.50
   0  10   9   36.80   10.70
   0 -10  -9   37.20   11.20
   0 -10  -9   49.80   11.50
   0  10  10   -8.70    7.40
   0  10 -10    6.20    7.10
   0 -10 -10  -13.70    8.00
   0 -10  10   11.20    5.80
   0  10 -11   23.90    8.60
   0  10  11   16.60    9.10
   0 -10  11   18.90    6.30
   0 -10 -11   19.90   10.00
   0 -10 -11    1.60    9.60
   0  10 -12   47.00   10.10
   0  10  12   37.00   17.20
   0 -10 -12   43.20   11.80
   0 -10 -12   44.10   12.20
   0 -10  12   45.80    7.50
   0  10  13  -11.60   13.50
   0  10 -13    9.20    9.30
   0 -10 -13    9.70   11.20
   0 -10 -13   17.80   10.40
   0 -10  13    2.70    6.40
   0  10 -14   32.70   11.70
   0  10  14   -5.80   13.80
   0 -10 -14   12.00   11.70
   0 -10  14    7.90    6.70
   0 -10 -14   18.50   12.90
   0  10 -15   56.29   12.40
   0 -10 -15   50.69   13.90
   0 -10  15   38.90    8.30
   0 -10 -15   54.49   14.20
   0  11   1  216.68   19.90
   0  11  -1  195.98   18.30
   0 -11  -1  172.88   20.60
   0 -11   1  157.38   20.10
   0 -11  -1  213.18   17.60
   0  11  -2   27.40    7.60
   0  11   2   51.19   10.50
   0 -11  -2   43.50   10.90
   0 -11   2   47.60   10.10
   0 -11  -2   42.00   11.50
   0  11  -3   22.20    8.80
   0  11   3   -1.20    7.80
   0 -11  -3   -5.30    8.60
   0 -11   3  -14.20    7.80
   0 -11  -3   10.90    9.30
   0  11  -4    4.80    5.80
   0  11   4    2.20    8.60
   0 -11  -4   -1.50    8.50
   0 -11  -4   -3.10    8.20
   0 -11   4    6.60    8.70
   0  11  -5   31.10    8.30
   0  11   5   32.00   10.60
   0 -11  -5   34.00    9.40
   0 -11   5   23.60   13.90
   0 -11   5   15.70   10.30
   0 -11  -5   27.90   10.70
   0  11  -6  324.17   22.00
   0  11   6  294.07   25.10
   0 -11  -6  337.97   27.60
   0 -11  -6  344.27   24.10
   0 -11   6  349.77   23.80
   0 -11   6  313.47   25.40
   0  11   7   42.00   14.20
   0  11  -7   50.09    9.70
   0 -11  -7   17.60   10.60
   0 -11  -7   33.60   10.70
   0 -11   7   45.70    9.10
   0  11  -8  265.37   20.40
   0  11   8  272.97   33.60
   0 -11  -8  247.38   23.10
   0 -11   8  275.57   19.10
   0 -11  -8  232.08   26.70
   0  11  -9   50.49   10.20
   0  11   9   43.20   14.10
   0 -11  -9   34.20   11.10
   0 -11  -9   53.89   12.00
   0 -11   9   39.10    8.00
   0  11  10   -8.90    9.30
   0  11 -10   -0.20    8.00
   0 -11 -10    3.90    8.30
   0 -11  10   -4.80    6.20
   0  11  11   -0.90    9.20
   0  11 -11   -2.10    7.60
   0 -11 -11   -1.90    9.00
   0 -11 -11   -0.50    9.40
   0 -11  11    5.10    6.70
   0  11  12  221.18   24.10
   0  11 -12  180.78   20.80
   0 -11 -12  198.58   23.80
   0 -11  12  205.88   18.10
   0 -11 -12  228.88   29.00
   0  11 -13   44.00   13.90
   0  11  13   33.70   14.10
   0 -11 -13   38.70   14.30
   0 -11 -13   45.50   19.20
   0 -11  13   47.20    9.10
   0  11  14   79.09   19.10
   0 -11 -14   98.69   17.70
   0 -11  14  135.59   15.70
   0 -11 -14   88.19   18.70
   0  12   0 1216.58   54.09
   0 -12   0 1339.07   57.59
   0 -12   0 1295.27   50.39
   0  12  -1   32.20    9.00
   0  12   1   23.90    8.90
   0 -12  -1   11.10    9.90
   0 -12   1   20.40    9.70
   0 -12  -1   24.40    9.10
   0  12  -2   28.70    9.10
   0  12   2   18.00    9.20
   0 -12  -2   12.10   10.00
   0 -12  -2    1.10    8.20
   0 -12   2   18.60    9.50
   0  12   3    4.00    9.30
   0  12  -3    8.00    7.50
   0 -12  -3    8.20    8.00
   0 -12  -3   -8.10    8.30
   0 -12   3   -1.50    8.50
   0  12  -4    9.20    7.70
   0 -12   4   -8.30    6.90
   0 -12  -4   -0.50    7.00
   0  12   5   40.40   11.40
   0 -12  -5   45.90   13.20
   0 -12  -5   63.69   11.00
   0 -12   5   38.90   10.50
   0  12  -6  162.48   17.40
   0  12   6  152.58   20.00
   0 -12   6  176.68   18.60
   0 -12  -6  179.68   19.00
   0  12   7   -3.80    7.80
   0  12   7    7.40    9.50
   0  12  -7   19.20    8.20
   0 -12  -7   10.20    9.40
   0 -12  -7   -2.40    9.30
   0 -12   7   11.80    7.30
   0  12  -8  199.68   19.80
   0  12   8  266.67   25.40
   0 -12   8  265.87   20.70
   0 -12  -8  229.58   32.40
   0 -12  -8  275.67   23.90
   0  12   9   49.80   11.90
   0  12  -9   40.30   10.20
   0 -12  -9   51.09   12.20
   0 -12  -9   43.50   14.00
   0 -12   9   36.60   10.10
   0  12  10   12.60   10.20
   0  12 -10   -1.80    8.30
   0 -12 -10   13.70   11.30
   0 -12 -10   15.80   10.80
   0  12  11    5.20    9.60
   0  12 -11    4.40   15.40
   0 -12 -11   15.50   11.60
   0 -12 -11   -0.50   10.80
   0  12  12   -2.60   10.50
   0 -12 -12    0.60   11.30
   0  13   0   -0.60    7.70
   0 -13   0  -13.20    7.30
   0  13   1   18.50    9.90
   0  13  -1   13.80    9.10
   0 -13  -1   15.60   10.00
   0 -13  -1   22.40    9.90
   0 -13   1   11.00    8.40
   0 -13   1   18.40   10.40
   0  13  -2   52.09   11.00
   0  13   2   54.79   12.40
   0 -13  -2   48.90   13.40
   0 -13  -2   74.89   12.40
   0 -13   2   53.49   12.60
   0  13  -3   45.80   10.60
   0  13   3   53.99   12.80
   0 -13   3   36.30   11.10
   0 -13  -3   53.39   13.20
   0 -13  -3   66.59   11.80
   0  13   4   19.00   11.10
   0  13  -4   21.70    8.90
   0 -13   4   19.70   10.20
   0 -13  -4   21.80   11.10
   0 -13  -4   20.90    9.80
   0  13   5   50.09   21.20
   0  13  -5   54.49   11.00
   0 -13  -5   52.29   11.40
   0 -13  -5   57.19   14.40
   0 -13   5   54.29   11.30
   0  13  -6   -8.50    7.50
   0  13   6   -7.20    9.30
   0 -13  -6   -5.60    8.10
   0 -13  -6  -14.20   10.00
   0 -13   6  -16.80    7.50
   0  13   7   24.80   11.60
   0  13  -7   40.60   11.60
   0 -13  -7   27.50   13.10
   0 -13   7   19.00   10.00
   0 -13  -7   21.90   10.50
   0  13   8    8.60    9.70
   0  13  -8   -6.10   13.20
   0 -13   8   -5.60    8.30
   0 -13  -8    7.40   11.70
   0 -13  -8   17.40   11.50
   0  13  -9   21.40   10.00
   0  13   9   32.60   11.30
   0 -13  -9   47.80   13.40
   0 -13   9   13.40    8.70
   0 -13  -9    8.80   11.60
   0  13 -10   -7.70    9.10
   0  13  10    7.40   10.90
   0 -13 -10    0.20   12.20
   0 -13  10    6.10    8.70
   0 -13 -10    9.40   12.30
   0  14   0   18.20    9.90
   0 -14   0   21.50   10.50
   0 -14   0    9.70   10.50
   0  14   1   28.30   11.00
   0  14  -1   36.00   10.90
   0 -14  -1   32.30   11.20
   0 -14   1   34.20   11.00
   0 -14  -1   38.10   12.50
   0 -14   1   28.10   13.40
   0  14   2   44.20   12.20
   0  14  -2   31.50   12.10
   0 -14   2   22.40   11.20
   0 -14  -2   29.20   13.10
   0 -14  -2   42.80   11.10
   0  14   3  -11.40    8.80
   0  14  -3    6.60   10.50
   0 -14  -3  -17.60    9.10
   0 -14  -3  -10.70    8.00
   0  14  -4   35.40   11.90
   0  14   4   23.90   12.80
   0 -14  -4   24.40   10.60
   0  14   5   45.10   12.90
   0  14  -5   41.60   11.40
   0 -14  -5   24.70   14.20
   0 -14  -5   46.50   11.00
   0 -14   5   30.00   12.30
   0  14   6   18.20   11.50
   0  14  -6   21.80   10.20
   0 -14  -6   37.30   12.40
   0 -14  -6    1.40   11.40
   0 -14   6    1.20   10.00
   0  14   7   39.70   13.50
   0  14  -7   29.10   11.20
   0 -14  -7   53.69   14.20
   0 -14   7   25.40   11.20
   0 -14  -7   36.20   13.70
   0  14  -8  -14.90    8.20
   0  14   8   -2.40   11.00
   0 -14  -8  -11.50   11.00
   0 -14  -8  -15.10   11.20
   0 -14   8  -14.40    9.90
   0  15   0    7.10   10.40
   0 -15   0   -6.30   10.80
   0 -15   0    8.70   12.90
   0  15   1   63.29   15.20
   0  15  -1   53.19   12.90
   0 -15   1   26.10   12.50
   0 -15  -1   61.89   19.30
   0 -15   1   49.00   15.00
   0 -15  -1   18.30   12.60
   0  15   2   29.10   11.70
   0 -15   2    0.30   12.20
   0 -15   2    7.40   11.30
   0 -15  -2    5.10   12.90
   0 -15  -2    4.00   11.80
   0  15  -3  214.58   24.20
   0  15   3  245.78   26.00
   0 -15  -3  255.47   24.00
   0 -15   3  198.38   26.90
   0 -15  -3  231.78   31.00
   0  15  -4   23.60   10.80
   0  15   4   29.80   12.80
   0 -15  -4   16.10   11.50
   0 -15   4   14.60   11.90
   0 -15  -4   10.80   13.10
   0  15  -5   25.30   11.00
   0  15   5   15.10   10.40
   0 -15  -5   41.10   14.70
   0 -15  -5    9.50   13.90
   0 -15   5   19.10   12.50
  -1   0  20  384.36   37.70
   1   0 -20  409.86   33.80
  -1   0  19   -9.10   11.60
   1   0 -19   -6.00    9.10
  -1   0  18   31.20   14.00
   1   0 -18   27.50   10.30
  -1   0  17    3.70   10.10
   1   0 -17    0.70    8.10
   1   0 -16  214.48   22.10
  -1   0  16  207.68   27.30
  -1   0  15   -0.70    5.90
  -1   0  15   -1.70   10.20
   1   0 -15    5.00    7.60
  -1   0  14  970.50   41.00
   1   0 -14  958.50   45.10
  -1   0  14  982.90   50.79
   1   0 -14  982.70   47.00
   1   0 -13   -7.10    7.70
  -1   0  13    9.00    9.70
  -1   0  13    0.90    5.70
   1   0 -13    3.40    6.20
   1   0 -12  494.85   20.90
   1   0 -12  495.15   30.50
  -1   0  12  558.54   33.30
  -1   0  12  551.14   25.10
   1   0 -12  546.45   28.60
   1   0 -11   -1.80    6.30
   1   0 -11   -0.30    5.10
   1   0 -11    6.20    2.50
  -1   0  11    8.30    7.90
  -1   0  11    0.50    4.60
  -1   0  11   -2.10    3.10
  -1   0  10   -3.10    3.20
  -1   0  10   -0.90    3.30
   1   0 -10   -1.40    6.00
   1   0 -10   -0.80    2.00
   1   0 -10   -1.30    3.90
  -1   0  10   -0.60    7.20
  -1   0   9    2.20    3.30
  -1   0   9    5.50    3.30
   1   0  -9   12.60    6.50
   1   0  -9    3.00    3.80
  -1   0   9   16.60    7.60
  -1   0   8 2061.49   76.09
   1   0  -8 2212.08   73.79
  -1   0   8 2223.98   73.09
   1   0  -8 2054.99   75.29
  -1   0   8 2309.77   71.69
  -1   0   7    6.40    3.00
  -1   0   7    9.20    5.50
  -1   0   7    5.60    2.80
   1   0  -7    3.90    3.00
   1   0  -7   10.90    5.00
  -1   0   6 2326.87   69.79
   1   0  -6 2197.48   71.29
  -1   0   6 1814.72   71.99
  -1   0   6 2322.77   71.09
   1   0  -5    2.30    3.60
   1   0  -5    1.70    1.70
  -1   0   5    1.70    1.80
  -1   0   5    7.90    4.30
  -1   0   5    3.40    2.10
   1   0  -5   -0.90    2.10
  -1   0   4   69.59    4.90
  -1   0   4   89.29   10.20
   1   0  -4   77.99    5.90
  -1   0   4   75.99    5.70
  -1   0   3    4.80    2.20
   1   0  -3   -2.70    1.70
   1   0  -3    0.80    1.50
  -1   0   3    2.80    1.10
   1   0  -3    0.90    1.10
  -1   0   3    1.10    1.20
   1   0  -2   25.60    2.60
   1   0  -2   28.60    2.10
  -1   0  -2    2.80    1.70
   1   0   2    2.90    0.90
   1   0   2    3.00    1.20
  -1   0  -2    1.80    1.20
  -1   0  -2    2.80    0.90
   1   0   2    3.60    1.80
   1   0   3    9.20    3.30
  -1   0  -3    2.20    2.00
  -1   0  -3    1.60    1.30
   1   0   3    2.30    1.80
  -1   0  -4  556.54   20.00
   1   0   4  623.04   22.60
   1   0   4  570.74   21.60
  -1   0  -4  560.24   22.00
  -1   0  -4  599.54   24.00
   1   0   5    1.60    2.20
   1   0   5   -3.30    4.00
  -1   0  -5    3.40    1.80
  -1   0  -5    2.80    2.60
   1   0   5    1.90    2.00
  -1   0  -5    7.90    7.00
  -1   0  -6 1087.09   36.90
   1   0   6 1100.29   39.80
  -1   0  -6 1130.49   42.10
   1   0   6 1113.69   39.20
  -1   0  -6 1123.39   40.30
  -1   0  -7    4.20    3.60
   1   0   7    0.20    2.70
   1   0   7    2.90    2.80
  -1   0  -7   -0.50    2.20
  -1   0  -7    5.50    5.10
   1   0   7   -7.80    4.90
  -1   0  -8  744.93   33.10
   1   0   8  730.93   29.90
  -1   0  -8  698.33   30.30
  -1   0  -8  702.53   26.20
   1   0   8  731.33   29.10
   1   0   9   -1.90    3.00
   1   0   9    2.90    3.40
  -1   0  -9    3.10    2.60
  -1   0  -9    1.80    4.10
  -1   0  -9    0.50    5.30
  -1   0 -10   82.29   11.90
   1   0  10   76.69   10.00
   1   0  10   94.89    9.90
  -1   0 -10   85.29    7.70
  -1   0 -10   62.39   13.00
  -1   0 -11   -1.70    4.80
   1   0  11   -3.20    3.90
  -1   0 -11   -1.50    3.10
   1   0  11   -4.00    4.10
   1   0  11   -3.40    8.10
  -1   0 -12 1452.15   51.49
  -1   0 -12 1518.35   61.79
  -1   0 -12 1528.85   59.09
   1   0  12 1518.05   62.29
  -1   0 -13   -6.80    4.20
   1   0  13   22.60   14.70
   1   0  13   -1.90    4.90
  -1   0 -13   -6.10    6.20
  -1   0 -14  475.85   21.90
   1   0  14  479.95   32.60
   1   0  14  447.36   39.30
  -1   0 -14  481.05   29.10
  -1   0 -15    5.60    7.90
   1   0  15    3.40   14.00
  -1   0 -16   -9.50    8.00
   1   0  16  -16.60   11.40
   1   0  17  -13.60   10.80
   1   0  18  199.18   29.70
  -1   0 -18  172.08   23.00
   1   0  19    4.70   12.80
  -1   0 -19  -11.90   10.20
   1   1 -20   12.20   11.50
  -1   1  20   32.60   15.10
   1  -1 -20   23.30   11.80
  -1  -1  20   50.99   17.10
  -1   1  19   -5.20   10.40
   1   1 -19   -5.30    9.30
  -1  -1  19   -0.40   11.70
   1  -1 -19   -4.50    9.40
   1   1 -18   -9.60    8.70
  -1   1  18    9.70   10.50
  -1  -1  18   -5.70    9.80
   1  -1 -18   -5.50    8.90
   1   1 -17  134.99   19.00
  -1   1  17  161.88   24.30
  -1  -1  17  137.59   22.90
   1  -1 -17  177.98   21.80
   1  -1 -17  135.19   13.60
   1   1 -16    3.40    6.70
  -1   1  16   -6.50   11.60
  -1  -1  16    2.00    8.00
   1  -1 -16    8.20    9.00
   1  -1 -16    1.70    5.20
  -1  -1  16   11.70   11.20
  -1   1  15  224.98   28.60
   1   1 -15  206.88   20.30
   1  -1 -15  204.98   15.10
  -1  -1  15  197.28   17.40
  -1  -1  15  193.38   26.90
   1  -1 -15  218.08   22.10
   1  -1 -15  201.28   20.50
  -1   1  14  185.88   15.90
   1   1 -14  206.58   19.30
   1   1 -14  200.68   27.70
  -1  -1  14  190.98   23.80
   1  -1 -14  204.48   14.40
   1  -1 -14  185.98   19.60
   1  -1 -14  171.58   19.10
  -1  -1  14  211.18   25.30
  -1   1  13   -1.90    4.50
  -1   1  13   -1.90    9.60
   1   1 -13   -4.50    5.50
  -1  -1  13   -2.00    4.30
  -1  -1  13    2.00    9.10
   1  -1 -13  -10.00    6.20
   1  -1 -13   -7.80    6.40
  -1   1  12   15.20   10.30
   1   1 -12   10.10    6.00
  -1   1  12    6.80    4.50
  -1  -1  12   10.90    6.20
   1  -1 -12    4.70    6.30
  -1  -1  12   10.90    8.30
   1  -1 -12   18.50    7.60
  -1  -1  12   18.90    5.10
  -1   1  11  363.76   20.50
   1   1 -11  408.06   25.40
  -1   1  11  379.16   19.90
   1  -1 -11  378.16   22.20
  -1  -1  11  394.56   19.10
   1  -1 -11  346.27   21.60
  -1  -1  11  358.76   20.70
  -1  -1  11  383.66   26.10
  -1   1  10    4.50    6.60
  -1   1  10   10.80    4.20
   1   1 -10   12.80    5.70
  -1   1  10   15.00    8.80
   1   1 -10    5.20    7.70
   1  -1 -10   15.20    5.70
  -1  -1  10   12.00    3.90
   1  -1 -10   16.60    5.60
  -1  -1  10   17.50    5.70
  -1  -1  10   13.10    7.50
   1   1  -9  271.77   16.80
  -1   1   9  286.17   15.20
  -1   1   9  273.17   15.60
   1  -1  -9  268.37   16.90
  -1  -1   9  281.67   20.80
   1  -1  -9  290.37   17.30
   1  -1  -9  278.27   16.30
  -1  -1   9  264.97   16.00
  -1  -1   9  285.67   14.50
   1   1  -8 1545.35   54.89
  -1   1   8 1528.55   53.89
  -1   1   8 1547.85   53.19
  -1  -1   8 1544.75   54.39
  -1  -1   8 1517.65   52.19
   1  -1  -8 1543.25   55.19
  -1  -1   8 1586.94   58.59
   1  -1  -8 1514.85   54.09
   1  -1  -8 1620.14   55.09
  -1   1   7   36.90    5.50
   1   1  -7   38.40    6.00
  -1   1   7   43.90    6.30
  -1  -1   7   30.90    7.20
   1  -1  -7   44.00    6.50
  -1  -1   7   31.50    5.30
  -1  -1   7   37.70    5.40
   1  -1  -7   52.89    9.40
   1  -1  -7   48.10    7.10
  -1   1   6 3300.67  104.99
   1   1  -6 3362.06  106.19
  -1   1   6 3299.17  105.49
  -1  -1   6 3272.07  103.89
  -1  -1   6 3342.87  105.89
   1  -1  -6 3451.55  105.99
  -1  -1   6 3450.65  109.09
   1  -1  -6 3282.87  106.19
   1  -1  -6 3198.38  105.49
  -1   1   5  213.08   10.30
  -1   1   5  206.08   10.50
   1   1  -5  200.18   10.80
   1  -1  -5  209.18   10.90
  -1  -1   5  176.88   13.20
  -1  -1   5  218.78    9.50
  -1  -1   5  224.08   12.30
   1  -1  -5  201.78   10.90
   1  -1  -5  213.38   10.70
   1   1  -4  467.45   21.00
  -1   1   4  468.35   17.80
   1   1  -4  470.85   18.10
  -1   1   4  490.65   17.80
  -1  -1   4  497.05   18.20
  -1  -1   4  472.25   16.60
   1  -1  -4  466.35   18.20
   1  -1  -4  486.25   17.70
  -1  -1   4  453.25   20.40
   1  -1  -4  470.65   18.00
   1   1  -3   28.90    5.20
  -1   1   3   34.70    3.40
  -1   1   3   35.70    3.50
  -1  -1   3   27.20    5.20
   1  -1  -3   31.40    3.10
   1  -1  -3   34.70    4.30
   1  -1  -3   32.40    3.60
  -1  -1   3   30.00    3.50
   1   1  -2 1482.75   46.60
  -1   1   2 1510.65   46.90
   1   1  -2 1467.35   47.00
  -1   1   2 1480.05   46.80
   1  -1  -2 1497.15   46.90
  -1  -1   2 1514.45   46.60
   1  -1  -2 1544.55   47.10
  -1  -1   2 1448.26   47.00
   1   1   1    3.20    1.00
   1   1   1    2.20    0.80
  -1   1  -1    1.20    1.30
   1   1   1    2.80    0.90
  -1  -1  -1    1.70    0.80
   1  -1   1    3.50    0.80
   1   1   2 2124.99   67.89
   1   1   2 2137.39   67.29
   1   1   2 2183.88   68.19
  -1  -1  -2 2208.18   67.59
  -1  -1  -2 2131.39   67.99
  -1  -1  -2 2163.78   67.29
   1  -1   2 2202.08   67.79
   1   1   3   41.80    5.40
   1   1   3   43.10    4.70
   1   1   3   43.60    4.50
  -1   1  -3   40.80    4.60
  -1  -1  -3   43.00    4.70
   1  -1   3   47.00    3.40
  -1  -1  -3   43.40    4.90
   1  -1   3   40.70    4.60
  -1  -1  -3   37.50    4.50
   1   1   4 3792.52  119.79
   1   1   4 3787.32  119.19
  -1   1  -4 3777.22  118.39
   1   1   4 3908.01  118.49
  -1  -1  -4 3744.13  118.29
  -1  -1  -4 3680.93  118.49
   1  -1   4 3828.72  115.59
  -1  -1  -4 3762.62  118.79
   1   1   5   12.20    4.20
   1   1   5    3.40    2.40
  -1   1  -5    3.30    1.50
   1   1   5    2.80    2.10
  -1   1  -5    3.60    4.20
  -1   1  -5   -0.30    2.50
  -1  -1  -5    4.10    2.80
  -1  -1  -5    2.20    2.60
   1  -1   5    2.70    2.50
   1  -1   5    2.80    4.70
  -1  -1  -5    2.20    2.40
  -1   1  -6 1210.78   43.20
  -1   1  -6 1184.78   39.60
   1   1   6 1215.68   42.60
   1   1   6 1232.78   42.80
  -1  -1  -6 1218.78   43.30
  -1  -1  -6 1215.18   43.80
   1  -1   6 1225.78   43.10
   1   1   7  135.39   10.00
  -1   1  -7  118.09    8.40
   1   1   7  129.49    9.80
  -1   1  -7  115.09   10.50
  -1   1  -7  105.49   15.10
   1  -1   7  114.59   10.30
   1  -1   7  113.39    9.50
   1  -1   7   91.59   14.50
  -1  -1  -7  124.29   10.90
  -1  -1  -7  126.99   10.70
  -1   1  -8  959.60   37.60
  -1   1  -8  935.61   42.50
   1   1   8  969.70   36.90
   1   1   8 1004.50   36.70
  -1   1  -8  934.21   32.30
  -1  -1  -8 1005.00   38.70
  -1  -1  -8  987.80   38.00
   1  -1   8  948.31   37.20
   1  -1   8  972.40   36.00
   1  -1   8  853.11   42.60
   1   1   9  384.06   19.20
   1   1   9  364.76   19.50
  -1   1  -9  370.96   20.40
  -1   1  -9  368.46   25.00
  -1   1  -9  382.26   15.30
  -1  -1  -9  371.66   20.80
   1  -1   9  370.86   19.70
  -1  -1  -9  386.26   17.30
  -1  -1  -9  372.96   21.00
   1  -1   9  360.76   26.50
   1  -1   9  399.06   19.20
   1   1  10   -1.50    3.60
   1   1  10    5.70    4.40
  -1   1 -10    1.10    2.40
   1   1  10    3.20    6.50
  -1   1 -10    6.90    5.50
  -1   1 -10   -3.70    6.90
  -1  -1 -10    0.70    3.10
   1  -1  10   -3.20    4.20
   1  -1  10    1.80    3.70
   1  -1  10    0.40    7.70
  -1  -1 -10   -2.30    4.60
  -1  -1 -10    4.00    5.90
   1   1  11   37.70    7.60
  -1   1 -11   33.80   14.00
   1   1  11   47.40    8.00
  -1   1 -11   44.70    8.20
   1  -1  11   40.70    6.90
  -1  -1 -11   37.20    8.50
   1  -1  11   40.00    8.00
  -1  -1 -11   35.60    5.60
  -1  -1 -11   38.90    8.20
   1  -1  11   50.39   12.30
  -1   1 -12  303.87   21.10
  -1   1 -12  270.67   25.90
   1   1  12  294.07   19.10
  -1  -1 -12  332.57   34.60
  -1  -1 -12  294.27   21.60
   1  -1  12  341.57   28.90
   1  -1  12  293.37   18.50
  -1  -1 -12  297.97   16.70
  -1   1 -13  240.08   20.30
   1   1  13  245.08   17.80
   1   1  13  193.38   29.20
  -1   1 -13  168.38   35.80
  -1  -1 -13  225.78   20.50
   1  -1  13  213.88   17.30
   1  -1  13  263.57   29.20
  -1  -1 -13  233.08   15.70
  -1  -1 -13  237.78   21.00
   1   1  14   25.40   17.00
  -1   1 -14   10.80    8.10
  -1  -1 -14    1.50    7.40
   1  -1  14  -14.30   11.50
  -1  -1 -14    3.30    5.30
   1  -1  14   -0.80    5.80
  -1  -1 -14   -0.10    8.50
   1   1  15  358.46   37.90
  -1   1 -15  390.76   27.70
   1  -1  15  383.46   35.40
  -1  -1 -15  425.26   29.00
  -1  -1 -15  389.66   22.00
   1   1  16   12.90   14.70
  -1   1 -16    9.60    9.20
   1  -1  16   17.80   12.00
  -1  -1 -16   13.10    6.80
  -1  -1 -16   14.60    9.40
   1   1  17   10.60   13.90
  -1  -1 -17   30.00   18.80
  -1  -1 -17   22.90    6.90
   1  -1  17   25.10   13.60
  -1   1 -18   -4.10    9.70
   1   1  18  -13.90   13.00
  -1  -1 -18   -1.90    5.90
   1  -1  18   -6.80   11.20
  -1  -1 -18    2.40    8.90
   1   1  19   39.70   15.50
  -1   1 -19   51.59   14.70
   1  -1  19   40.60   16.30
  -1  -1 -19   21.00   12.80
  -1  -1 -19   21.30    7.70
  -1   2  20    7.20   12.50
   1   2 -20   -4.90   10.20
   1  -2 -20  -10.60   11.10
  -1  -2  20   21.50   16.20
   1  -2 -20  -13.80    6.60
   1   2 -19   -3.00    9.70
  -1   2  19    3.00   12.40
  -1  -2  19    5.00   12.30
   1  -2 -19  -10.30   10.20
   1  -2 -19    4.00    6.40
  -1   2  18   21.30   13.50
   1   2 -18   24.90   10.00
  -1  -2  18   16.20   11.10
   1  -2 -18   20.70   10.10
   1  -2 -18   11.70    6.80
  -1   2  17    3.70   12.10
   1   2 -17   23.60    9.80
   1  -2 -17   12.60    6.90
  -1  -2  17   35.40   12.10
   1  -2 -17   -0.30    9.80
  -1   2  16   11.10   14.10
   1   2 -16   18.70    9.20
  -1  -2  16   22.10   12.80
  -1  -2  16   26.40    7.10
   1  -2 -16   23.10    7.20
   1  -2 -16   17.70    9.40
  -1   2  15   57.09   14.90
  -1  -2  15   32.80    8.60
   1  -2 -15   84.99   13.30
   1  -2 -15   51.49   12.00
  -1   2  14   43.70   14.90
   1   2 -14   34.10    9.40
   1  -2 -14   44.80   13.70
  -1  -2  14   44.90    7.90
  -1  -2  14   28.30   12.20
   1  -2 -14   20.60   10.00
  -1   2  13    2.90    5.10
   1   2 -13    0.40    6.40
  -1   2  13    6.90   11.00
   1  -2 -13   -7.90    5.50
   1  -2 -13   -1.40    6.40
  -1  -2  13   -3.50    8.50
  -1  -2  13   -6.40    4.30
  -1   2  12    1.60    8.70
   1   2 -12   -1.30    5.10
  -1   2  12    3.50    4.80
   1  -2 -12   -2.90    5.10
   1  -2 -12   -5.70    4.70
  -1  -2  12    1.80    3.50
  -1  -2  12  -14.00   11.30
  -1  -2  12    4.90    6.10
   1   2 -11  220.78   17.80
  -1   2  11  252.37   16.30
  -1   2  11  231.48   15.70
   1  -2 -11  254.57   17.30
  -1  -2  11  226.58   16.30
  -1  -2  11  243.78   14.60
   1  -2 -11  269.57   18.10
  -1  -2  11  276.37   22.10
   1  -2 -11  248.08   18.10
  -1   2  10    4.90    3.80
   1   2 -10   13.40    5.60
  -1   2  10    5.10    5.60
  -1   2  10   13.80    4.30
  -1  -2  10   16.90    7.20
   1  -2 -10   14.10    5.90
  -1  -2  10   12.70    4.10
   1  -2 -10   13.70    4.80
   1  -2 -10    9.40    5.30
  -1  -2  10   18.40    5.50
  -1   2   9  427.86   20.00
   1   2  -9  392.26   20.60
  -1   2   9  389.26   19.60
   1  -2  -9  415.76   21.70
  -1  -2   9  419.76   25.30
   1  -2  -9  435.86   20.20
   1  -2  -9  394.96   21.00
  -1  -2   9  394.96   18.20
  -1  -2   9  385.66   20.40
  -1   2   8  100.89    9.10
   1   2  -8   93.49    9.90
  -1   2   8  109.19    9.20
   1   2  -8  138.29   18.00
   1  -2  -8  102.19   10.40
   1  -2  -8   97.29   10.30
  -1  -2   8   89.89    9.10
  -1  -2   8  100.89    9.30
   1  -2  -8   99.69    9.10
  -1   2   7   27.70    6.40
   1   2  -7   33.90    5.50
  -1   2   7   48.70    6.30
  -1   2   7   44.80    6.20
   1  -2  -7   48.10    7.40
   1  -2  -7   45.60    7.20
  -1  -2   7   44.70    6.10
  -1  -2   7   28.70    7.20
   1  -2  -7   38.00    6.30
  -1   2   6    8.70    3.00
  -1   2   6    5.80    2.60
   1   2  -6    5.40    2.70
   1   2  -6    4.80    5.30
  -1  -2   6   -0.90    4.10
   1  -2  -6    6.60    2.60
   1  -2  -6    6.20    3.10
   1  -2  -6    7.50    2.80
  -1  -2   6    5.30    2.70
   1   2  -5  561.94   25.60
  -1   2   5  563.44   21.50
  -1   2   5  578.44   22.20
   1   2  -5  529.75   21.40
  -1   2   5  540.95   21.10
   1   2  -5  557.54   21.50
   1  -2  -5  564.54   20.60
  -1  -2   5  527.45   24.70
   1  -2  -5  553.04   22.00
  -1  -2   5  570.44   21.80
   1  -2  -5  560.44   22.00
  -1   2   4   13.30    2.50
   1   2  -4    5.70    6.20
   1   2  -4   10.40    2.70
  -1   2   4   10.50    4.30
   1   2  -4   12.00    2.70
  -1   2   4   13.00    3.30
  -1  -2   4   14.30    3.00
   1  -2  -4   11.00    2.70
   1  -2  -4   11.50    2.40
   1  -2  -4   11.80    3.10
   1   2  -3 4941.91  153.68
   1   2  -3 4948.90  150.48
  -1   2   3 4951.20  150.88
  -1   2   3 5041.50  150.58
  -1   2   3 4791.22  149.69
   1   2  -3 4795.02  150.78
  -1  -2   3 4927.31  150.98
   1  -2  -3 4949.80  151.38
  -1  -2   3 4934.51  150.38
   1  -2  -3 4929.91  150.98
   1  -2  -3 4783.52  150.68
  -1   2   2  102.39    6.00
   1   2  -2   94.99    4.30
  -1   2   2   97.79    5.40
   1   2  -2   97.29    5.70
  -1   2   2  106.49    5.80
  -1  -2   2  103.09    5.90
  -1  -2   2   93.59    4.30
   1  -2  -2  104.79    5.70
   1  -2  -2  100.59    5.90
   1  -2  -2   95.89    5.60
  -1  -2   2  104.59    5.30
   1   2  -1   57.69    4.60
   1   2  -1   49.99    2.90
  -1   2   1   51.49    3.70
  -1   2   1   33.60    5.20
  -1  -2   1   52.59    3.80
   1  -2  -1   50.49    3.60
  -1  -2   1   47.60    3.00
   1  -2  -1   43.10    5.50
  -1   2   0    0.10    0.90
   1   2   0    1.00    0.90
  -1   2   0    1.70    1.10
   1   2   0    0.60    1.80
   1  -2   0    1.20    1.00
   1  -2   0    0.70    1.00
  -1  -2   0    1.40    1.10
  -1  -2   0    1.60    1.10
   1   2   1  360.16   13.50
   1   2   1  352.96   12.50
   1   2   1  380.46   13.80
  -1   2  -1  338.27   12.80
  -1   2  -1  375.16   12.90
  -1   2  -1  347.67   15.30
   1  -2   1  323.47   12.70
  -1  -2  -1  337.77   12.50
   1  -2   1  360.96   13.00
   1  -2   1  367.26   16.90
  -1  -2  -1  386.36   13.50
  -1  -2  -1  389.16   14.90
   1   2   2    3.70    1.90
   1   2   2    2.60    1.40
  -1   2  -2    9.60    4.00
  -1   2  -2    2.30    2.90
   1   2   2    1.10    3.30
   1   2   2    4.40    1.90
  -1  -2  -2    3.80    1.70
   1  -2   2    3.20    1.40
  -1  -2  -2    2.70    2.00
  -1  -2  -2    2.70    1.90
   1   2   3  804.62   27.80
   1   2   3  855.81   29.10
  -1   2  -3  799.32   27.60
   1   2   3  807.22   28.90
   1  -2   3  858.51   28.80
  -1  -2  -3  828.52   28.30
  -1  -2  -3  812.72   28.20
   1  -2   3  829.92   32.10
  -1  -2  -3  779.22   28.70
  -1  -2  -3  788.12   29.10
   1   2   4   41.70    5.50
   1   2   4   49.50    5.40
   1   2   4   45.90    6.10
  -1   2  -4   43.80    4.80
  -1   2  -4   44.40    5.60
  -1  -2  -4   41.10    5.80
   1  -2   4   45.00    5.30
  -1  -2  -4   45.80    5.40
   1  -2   4   32.00    6.50
  -1  -2  -4   42.30    5.40
  -1  -2  -4   40.50    5.40
   1   2   5  615.84   24.90
   1   2   5  623.94   24.30
  -1   2  -5  618.34   24.30
  -1   2  -5  596.84   23.20
   1   2   5  611.84   23.60
  -1  -2  -5  577.24   24.60
  -1  -2  -5  629.64   24.60
  -1  -2  -5  617.34   24.40
   1  -2   5  671.63   28.90
   1  -2   5  621.94   20.90
   1  -2   5  637.74   24.50
  -1   2  -6   -0.50    2.80
   1   2   6    0.30    2.30
  -1   2  -6   -5.60    4.20
   1   2   6    0.00    3.70
   1   2   6    0.30    2.70
   1  -2   6    2.60    5.30
  -1  -2  -6   -2.70    2.80
  -1  -2  -6    1.90    3.00
   1  -2   6    0.70    3.00
  -1  -2  -6   -1.50    2.80
   1   2   7  620.24   25.70
   1   2   7  640.54   28.40
   1   2   7  607.04   25.20
  -1   2  -7  611.54   26.40
   1  -2   7  587.04   26.10
  -1  -2  -7  609.34   26.80
  -1  -2  -7  623.94   26.70
   1  -2   7  656.43   32.00
  -1  -2  -7  616.54   26.20
   1   2   8  104.19   10.20
   1   2   8  110.19    9.90
  -1   2  -8  105.19   10.80
   1   2   8  134.79   15.50
  -1  -2  -8  113.49   11.30
  -1  -2  -8  112.69   10.60
  -1  -2  -8  111.49   11.40
   1  -2   8  124.59   17.60
   1  -2   8  113.89   10.70
   1   2   9  839.92   34.00
   1   2   9  813.92   33.70
  -1   2  -9  796.82   34.70
   1  -2   9  839.32   32.80
   1  -2   9  909.61   41.50
  -1  -2  -9  872.71   35.90
   1  -2   9  790.42   34.40
  -1  -2  -9  858.21   35.30
   1   2  10   85.39    9.50
  -1   2 -10   50.19   13.40
   1   2  10   91.99   10.40
   1  -2  10   79.49   10.60
   1  -2  10   93.89    9.80
  -1  -2 -10   75.39   11.10
   1  -2  10   92.79   16.60
  -1   2 -11   -5.20    9.20
   1   2  11    0.10    4.00
   1   2  11   -1.10    8.00
   1   2  11   -3.90    4.30
  -1   2 -11   -1.50    4.80
   1  -2  11   -3.40    5.00
   1  -2  11   -1.20    3.90
  -1  -2 -11   -2.60    5.40
   1  -2  11   -1.70   10.50
  -1  -2 -11   -9.40    5.50
   1   2  12  -13.30    7.70
   1   2  12    1.10    5.30
  -1   2 -12    4.10    6.20
  -1  -2 -12   -4.00    6.30
   1  -2  12    6.90    9.50
   1  -2  12    2.30    4.70
  -1  -2 -12    7.90    5.00
  -1  -2 -12   -3.20    5.80
   1   2  13   48.60   19.50
  -1   2 -13   27.80    8.50
  -1  -2 -13   18.30    6.50
  -1  -2 -13   23.20    8.80
   1  -2  13   29.80   12.00
  -1  -2 -13   14.10    7.30
  -1   2 -14   11.80    8.10
   1  -2  14  -10.30   11.00
   1  -2  14    6.50    6.20
  -1  -2 -14    2.60    6.30
  -1  -2 -14    1.20    6.90
  -1  -2 -14   -6.60    7.80
   1   2  15  167.98   30.10
  -1  -2 -15  101.49   14.70
  -1   2 -16   70.39   12.80
   1   2  16   71.19   20.00
  -1  -2 -16   66.79   12.90
  -1  -2 -16   96.79   13.90
   1  -2  16   76.49   17.00
  -1   2 -17    8.90   14.30
   1   2  17   -3.80   15.50
  -1  -2 -17    9.90    7.40
   1  -2  17   17.80   11.60
  -1  -2 -17   -1.00   10.40
  -1   2 -18   51.99   13.40
   1   2  18   28.50   19.30
  -1  -2 -18   36.10    9.70
   1  -2  18   27.60   14.20
  -1  -2 -18   41.70   12.00
  -1   2 -19   26.40   11.90
   1   2  19    5.70   16.20
  -1  -2 -19   16.20   11.00
  -1  -2 -19   26.00   13.00
   1  -2  19   20.80   14.50
   1   3 -19   20.80   10.70
  -1   3  19   24.00   15.10
   1   3 -19   37.20   12.90
   1  -3 -19   24.60   13.40
   1  -3 -19   24.60    9.40
   1   3 -18   17.10   11.30
  -1   3  18    0.30   14.50
   1  -3 -18   17.10    9.00
   1  -3 -18   24.80   11.30
  -1   3  17    3.00   14.40
   1   3 -17   -8.30    7.20
   1   3 -17    8.40    9.10
  -1  -3  17   11.00   11.80
   1  -3 -17   -5.60   10.50
  -1  -3  17    6.50    7.30
   1   3 -16   -6.90    6.50
   1   3 -16   -1.50    8.40
  -1   3  16    1.10   14.20
  -1  -3  16    6.90    5.70
  -1  -3  16   -8.60    9.60
   1  -3 -16   -1.40    6.30
   1  -3 -16   -4.70    6.80
  -1   3  15  131.19   31.30
   1   3 -15  191.38   18.20
   1   3 -15  125.59   17.50
  -1  -3  15  145.09   16.80
  -1  -3  15  132.09   23.50
   1  -3 -15  124.69   19.00
   1  -3 -15  157.18   17.40
   1   3 -14    6.80    8.00
   1   3 -14   14.00    7.30
   1  -3 -14    8.40    6.60
  -1  -3  14   10.00    5.60
   1  -3 -14   -4.90    7.60
  -1  -3  14   -9.50   10.30
   1   3 -13   58.79   11.20
  -1   3  13  104.19   20.60
   1   3 -13   68.19   11.20
  -1  -3  13   70.29   15.00
   1  -3 -13   63.09   11.90
   1  -3 -13   76.49   13.70
  -1  -3  13   94.89   11.50
   1  -3 -13   66.99   13.10
  -1   3  12  120.29   12.30
   1   3 -12  105.89   13.90
   1   3 -12   70.19   10.80
  -1  -3  12  121.59   18.80
  -1  -3  12  103.79   10.70
   1  -3 -12  114.49   15.50
   1  -3 -12  115.29   14.80
   1  -3 -12   84.09   12.80
  -1   3  11   -3.00    6.40
   1   3 -11   -0.70    5.80
   1   3 -11    1.70    5.70
   1   3 -11    8.50    6.20
  -1   3  11   11.30    4.90
  -1   3  11   13.50    5.00
   1  -3 -11    6.40    5.60
   1  -3 -11    8.80    5.80
  -1  -3  11    7.70    5.30
   1  -3 -11    9.70    7.50
  -1  -3  11   18.10    4.90
   1   3 -10    8.00    4.40
  -1   3  10    7.60    4.00
  -1   3  10   -3.80    6.10
   1   3 -10    3.40    5.90
  -1   3  10    9.50    3.80
   1   3 -10   11.20    6.00
  -1  -3  10    8.30    6.50
   1  -3 -10    7.40    6.10
   1  -3 -10    7.40    5.30
   1  -3 -10    6.10    4.40
  -1  -3  10    7.60    3.90
  -1  -3  10    6.90    6.10
  -1   3   9   83.39    8.70
   1   3  -9   85.69    9.60
   1   3  -9   78.99   10.20
  -1   3   9   94.59   13.40
  -1   3   9   91.29    9.40
   1  -3  -9   91.39   11.20
   1  -3  -9   86.69   11.20
  -1  -3   9   63.79    9.90
   1  -3  -9   83.99    9.10
  -1  -3   9   70.99   12.20
   1   3  -8   22.40    4.90
   1   3  -8   23.10    5.40
  -1   3   8   25.80    4.80
   1   3  -8    7.60    7.70
  -1   3   8   22.30    5.00
  -1  -3   8   14.20    7.50
  -1  -3   8   31.50    6.10
   1  -3  -8   22.70    5.90
   1  -3  -8   35.70    6.50
   1  -3  -8   23.90    5.90
  -1   3   7    4.30    3.00
  -1   3   7    3.00    2.60
   1   3  -7    4.30    3.50
   1   3  -7   -3.30    2.60
  -1   3   7    1.70    4.10
   1   3  -7   -3.50    5.80
   1  -3  -7   -2.80    3.40
  -1  -3   7   -4.30    2.90
   1  -3  -7    1.70    3.10
  -1  -3   7   -7.60    5.10
   1  -3  -7    0.20    2.60
   1   3  -6 2638.54   92.59
  -1   3   6 2661.33   86.19
   1   3  -6 2607.14   86.89
   1   3  -6 2628.34   86.79
  -1   3   6 2791.02   87.29
  -1   3   6 2666.43   86.39
   1  -3  -6 2654.23   85.69
  -1  -3   6 2701.73   87.19
   1  -3  -6 2714.93   87.79
   1  -3  -6 2721.83   88.39
  -1  -3   6 2770.02   92.39
   1   3  -5   53.69    9.20
  -1   3   5   46.90    5.70
  -1   3   5   50.99    5.50
  -1   3   5   48.70    5.40
   1   3  -5   46.80    5.80
   1   3  -5   54.29    5.80
  -1  -3   5   53.59    5.90
   1  -3  -5   48.30    6.40
   1  -3  -5   48.70    6.20
   1  -3  -5   48.90    6.30
  -1   3   4  702.73   25.70
   1   3  -4  702.13   25.60
  -1   3   4  718.53   25.20
   1   3  -4  718.33   29.50
  -1   3   4  618.34   28.60
   1  -3  -4  693.03   26.50
  -1  -3   4  727.13   25.30
  -1  -3   4  656.43   22.80
  -1  -3   4  709.73   25.90
   1  -3  -4  693.03   25.70
   1  -3  -4  682.53   25.50
  -1   3   3    8.20    2.80
  -1   3   3    9.70    2.70
   1   3  -3    7.50    2.30
  -1   3   3    8.70    2.40
  -1  -3   3    7.60    2.20
   1  -3  -3    5.80    2.40
   1  -3  -3    6.40    2.40
   1  -3  -3    6.30    2.60
  -1  -3   3    6.50    1.60
   1   3  -2 3552.44  109.59
  -1   3   2 3506.35  110.09
   1   3  -2 3326.47  107.79
  -1  -3   2 3661.63  110.09
   1  -3  -2 3544.65  109.19
   1  -3  -2 3450.75  110.09
   1  -3  -2 3689.53  109.89
  -1  -3   2 3475.75  107.99
  -1   3   1  119.79    7.00
  -1   3   1  116.59    6.80
   1   3  -1  111.59    5.90
   1   3  -1  117.79    6.80
   1  -3  -1  122.19    6.70
   1  -3  -1  113.69    6.90
  -1  -3   1  120.89    7.00
  -1   3   0  975.30   33.40
   1   3   0  963.60   33.10
  -1   3   0 1032.80   33.60
   1   3   0 1054.99   34.00
   1  -3   0 1015.90   33.40
  -1  -3   0  995.10   33.60
  -1  -3   0 1059.19   34.00
   1  -3   0  975.70   33.50
  -1   3  -1  110.39    6.30
  -1   3  -1   98.19    6.00
   1   3   1  106.49    6.60
   1   3   1  108.69    6.90
   1  -3   1  102.59    6.20
  -1  -3  -1  107.89    7.00
   1  -3   1  113.39    6.50
  -1  -3  -1  115.29    6.70
   1   3   2   11.40    3.00
  -1   3  -2   11.80    5.60
   1  -3   2   19.60    5.00
   1   3   3   64.89    6.20
  -1   3  -3   68.69    5.50
   1   3   3   67.29    5.30
  -1   3  -3   73.89   10.80
   1   3   3   65.09    6.20
   1   3   3   63.39    6.00
  -1  -3  -3   67.39    6.80
   1  -3   3   69.99    5.60
  -1  -3  -3   69.49    5.90
  -1  -3  -3   64.09    5.60
   1  -3   3   58.09    9.00
  -1   3  -4  299.97   13.60
  -1   3  -4  286.97   19.10
   1   3   4  322.37   14.90
   1   3   4  289.37   13.30
   1   3   4  302.37   14.80
  -1  -3  -4  308.97   15.30
  -1  -3  -4  330.97   14.40
  -1  -3  -4  303.87   14.30
   1  -3   4  314.97   18.20
   1  -3   4  371.36   16.20
   1  -3   4  313.67   14.60
   1   3   5  369.16   17.10
   1   3   5  374.86   15.90
  -1   3  -5  361.26   15.90
   1   3   5  372.56   17.30
  -1  -3  -5  362.26   16.50
   1  -3   5  351.36   20.80
   1  -3   5  374.06   17.00
  -1  -3  -5  377.96   18.10
  -1  -3  -5  369.16   16.90
  -1  -3  -5  327.37   22.10
  -1   3  -6  381.66   18.40
   1   3   6  375.66   17.40
  -1   3  -6  395.46   17.70
   1   3   6  392.66   18.70
   1   3   6  395.96   19.20
  -1  -3  -6  376.66   18.90
  -1  -3  -6  408.66   18.50
  -1  -3  -6  405.86   20.20
  -1  -3  -6  393.56   18.50
   1  -3   6  384.46   18.70
   1  -3   6  404.06   23.40
   1   3   7  104.39    9.90
   1   3   7   95.49   11.50
   1   3   7   99.39    8.70
  -1   3  -7  102.49    9.00
  -1   3  -7  108.09   10.30
  -1  -3  -7   94.19    9.80
  -1  -3  -7  104.99   11.30
  -1  -3  -7  104.19    9.60
  -1  -3  -7  114.89   11.00
   1  -3   7  107.79   10.00
   1   3   8   16.20    6.00
  -1   3  -8   17.00    4.50
   1   3   8   12.70    4.50
  -1   3  -8   11.00    5.00
   1   3   8    8.50    4.30
  -1  -3  -8   14.80    4.60
  -1  -3  -8   13.80    5.10
   1  -3   8    3.50    4.20
  -1  -3  -8    6.40    4.80
   1  -3   8    7.40    7.20
  -1   3  -9    2.50    4.30
   1   3   9    6.80    7.00
  -1   3  -9   -6.50    6.30
   1   3   9    2.20    4.30
  -1   3  -9    6.10    4.10
   1   3   9    2.80    4.20
   1  -3   9    4.20    4.30
   1  -3   9    8.30    7.40
  -1  -3  -9    6.70    5.00
  -1  -3  -9    1.40    4.10
  -1  -3  -9   -0.60    5.00
  -1   3 -10  335.27   23.80
   1   3  10  281.77   23.60
   1   3  10  352.06   20.00
   1   3  10  345.37   19.30
  -1   3 -10  326.77   19.30
  -1  -3 -10  346.27   20.50
   1  -3  10  346.27   37.40
   1  -3  10  324.47   19.90
  -1  -3 -10  366.76   23.30
  -1  -3 -10  362.46   22.10
  -1   3 -11   56.99    9.40
  -1   3 -11   69.79   10.30
   1   3  11   61.59    9.60
   1  -3  11   84.19   12.50
  -1  -3 -11   70.39   11.60
   1  -3  11   88.39   17.40
   1  -3  11   87.59   10.40
  -1  -3 -11   66.39   12.60
  -1   3 -12   36.20    8.80
  -1  -3 -12   64.69   13.40
  -1  -3 -12   42.00    9.90
   1  -3  12   34.00    6.80
  -1   3 -13  167.78   18.40
  -1   3 -13  178.58   17.60
   1  -3  13  186.68   15.60
  -1  -3 -13  156.48   20.20
   1  -3  13  160.78   24.30
  -1  -3 -13  173.98   17.60
   1   3  14   -3.30   10.00
  -1   3 -14    2.20    6.50
  -1   3 -14    4.40    8.20
  -1  -3 -14   -4.60    6.40
  -1  -3 -14   -3.90    6.30
   1  -3  14   -7.60    6.30
   1  -3  14   -4.50   10.50
  -1  -3 -14   -8.20    8.00
  -1   3 -15  139.99   17.50
  -1   3 -15  119.29   17.70
   1   3  15  151.88   25.70
   1  -3  15   94.39   18.90
  -1  -3 -15  135.19   19.10
   1  -3  15  126.29   14.90
  -1  -3 -15  143.99   22.70
  -1   3 -16   -1.90    7.30
  -1   3 -16    8.20    8.90
   1   3  16   28.20   15.70
   1  -3  16   19.20   12.00
  -1  -3 -16    3.10    7.00
  -1  -3 -16   16.60    9.40
  -1   3 -17   -2.40    8.30
  -1   3 -17   12.50   11.00
   1   3  17   -4.60   15.70
  -1  -3 -17    7.10   10.20
  -1  -3 -17   10.10    8.40
   1  -3  17    6.20   12.20
  -1   3 -18   37.60   12.20
   1   3  18   12.60   19.00
  -1   3 -18   32.50   10.60
  -1  -3 -18   63.59   14.70
  -1  -3 -18   33.80   10.40
   1  -3  18   33.30   20.40
  -1   3 -19   37.40   13.50
  -1   3 -19   21.50   10.80
   1   3  19   25.50   19.00
  -1  -3 -19   33.40   10.60
   1  -3  19   36.50   15.00
  -1  -3 -19   44.00   13.90
  -1   4  19   11.70   14.20
   1   4 -19   26.00   12.00
   1   4 -19   15.70   10.50
   1  -4 -19    1.90    9.00
   1  -4 -19   17.40   12.60
   1   4 -18  324.17   27.40
  -1   4  18  308.37   36.10
   1   4 -18  342.57   28.60
   1  -4 -18  344.77   31.60
   1  -4 -18  381.46   27.30
  -1  -4  18  314.97   28.30
  -1   4  17   17.20   15.70
   1   4 -17   28.20   10.30
   1   4 -17   12.20   10.40
   1  -4 -17    5.90   13.20
  -1  -4  17   20.00    8.10
   1  -4 -17   25.30    9.20
   1   4 -16    3.60    7.10
  -1   4  16   12.40   14.60
   1   4 -16  -13.30    7.70
  -1  -4  16    8.70    8.90
   1  -4 -16   -5.90    8.60
   1  -4 -16   -0.80    7.00
   1   4 -15   52.39   10.50
   1   4 -15   39.50   10.60
   1  -4 -15   65.09   13.60
   1  -4 -15   43.90   12.00
  -1  -4  15   43.00    7.10
   1   4 -14  245.38   21.20
   1   4 -14  238.78   19.90
   1  -4 -14  256.37   22.90
   1  -4 -14  236.38   18.50
  -1  -4  14  194.48   27.20
   1  -4 -14  190.18   22.10
  -1  -4  14  255.07   16.80
  -1   4  13   -0.20    8.50
   1   4 -13   20.00    8.00
   1   4 -13   21.70    6.90
  -1  -4  13   17.20   11.20
   1  -4 -13   18.30    6.50
  -1  -4  13   16.50    5.30
   1  -4 -13    1.60    8.10
   1  -4 -13   -2.50    7.80
   1   4 -12  454.85   26.20
   1   4 -12  441.36   26.30
   1  -4 -12  475.35   28.90
   1  -4 -12  460.35   24.70
   1  -4 -12  488.65   28.90
  -1  -4  12  489.55   33.80
  -1  -4  12  488.95   22.80
   1   4 -11  167.58   15.20
  -1   4  11  108.99   13.10
   1   4 -11  149.19   14.30
   1  -4 -11  145.39   16.10
  -1  -4  11  141.69   19.70
  -1  -4  11  130.19   11.00
  -1  -4  11  132.49   13.30
   1  -4 -11  141.09   15.90
   1  -4 -11  124.29   13.30
   1   4 -10   13.80    7.10
  -1   4  10    1.70    7.40
   1   4 -10    8.60    5.40
  -1   4  10   15.50    5.30
  -1   4  10   19.10    5.30
   1   4 -10   12.90    5.20
   1  -4 -10    5.00    4.40
  -1  -4  10   12.20    6.40
   1  -4 -10   20.50    7.20
  -1  -4  10    7.90   12.60
  -1   4   9  302.17   18.50
  -1   4   9  313.07   19.10
   1   4  -9  282.87   17.40
   1   4  -9  294.87   16.90
   1  -4  -9  269.57   18.50
   1  -4  -9  274.47   15.70
  -1  -4   9  283.37   17.20
   1  -4  -9  308.67   20.40
   1  -4  -9  286.67   18.60
  -1   4   8  192.58   13.20
  -1   4   8  183.58   12.40
  -1   4   8  166.98   12.70
   1   4  -8  197.98   13.30
   1   4  -8  195.08   13.00
   1  -4  -8  154.18   13.70
   1  -4  -8  182.08   13.00
   1  -4  -8  189.58   14.60
  -1  -4   8  188.88   13.30
   1   4  -7  201.88   12.80
  -1   4   7  181.98   12.20
   1   4  -7  165.58   19.70
   1   4  -7  193.98   12.50
  -1   4   7  200.48   12.10
  -1   4   7  168.78   12.30
   1  -4  -7  197.18   13.80
   1  -4  -7  191.98   14.40
  -1  -4   7  207.58   13.10
   1  -4  -7  186.08   12.70
  -1   4   6  692.03   28.20
   1   4  -6  750.92   35.10
   1   4  -6  740.93   29.00
  -1   4   6  737.83   29.30
  -1   4   6  743.23   28.70
   1  -4  -6  756.72   29.60
   1  -4  -6  750.12   30.90
   1  -4  -6  743.13   30.10
  -1  -4   6  782.62   29.30
   1   4  -5  854.11   31.70
   1   4  -5  854.21   36.60
  -1   4   5  825.32   30.80
  -1   4   5  883.01   31.20
  -1   4   5  834.82   31.70
  -1  -4   5  798.72   28.30
   1  -4  -5  860.81   31.90
   1  -4  -5  845.02   33.10
  -1  -4   5  878.81   32.30
   1  -4  -5  866.21   32.00
  -1  -4   5  846.82   31.30
   1   4  -4   95.69    7.70
  -1   4   4   91.29    7.70
   1   4  -4   85.79   10.70
  -1   4   4   91.89    7.10
  -1  -4   4   90.19    5.60
   1  -4  -4   89.59    7.70
   1  -4  -4  102.39    8.80
  -1  -4   4   92.89    7.90
  -1  -4   4  100.39    8.50
   1  -4  -4   88.29    7.80
   1   4  -3 2083.29   68.59
   1   4  -3 2005.30   66.59
  -1   4   3 2147.69   69.89
  -1   4   3 2104.89   68.99
   1  -4  -3 2127.69   68.59
   1  -4  -3 2170.88   69.09
   1  -4  -3 2160.78   70.09
  -1  -4   3 2227.28   69.69
  -1  -4   3 2091.69   66.69
   1   4  -2   26.50    3.80
   1   4  -2   34.40    4.90
  -1   4   2   28.90    4.50
  -1   4   2   27.00    3.80
  -1  -4   2   21.60    3.00
  -1  -4   2   30.00    4.80
   1  -4  -2   31.30    5.10
   1  -4  -2   35.70    4.80
   1  -4  -2   29.40    4.60
   1   4  -1   90.79    6.00
   1   4  -1  106.49    7.00
  -1   4   1  104.79    7.40
  -1   4   1   91.29    6.70
   1  -4  -1   88.99    7.00
   1  -4  -1   98.99    6.60
  -1  -4   1  101.79    7.20
  -1  -4   1   90.79    6.20
  -1   4   0    4.80    2.40
   1   4   0    5.80    2.10
   1  -4   0    4.50    2.30
  -1  -4   0   10.00    2.50
   1  -4   0    4.70    2.30
  -1  -4   0    3.40    2.20
  -1   4  -1  324.87   13.20
   1   4   1  318.17   14.00
  -1   4  -1  307.67   12.90
   1   4   1  277.27   12.90
  -1   4  -1  306.27   16.50
   1  -4   1  293.17   12.80
  -1  -4  -1  315.97   13.50
  -1  -4  -1  263.67   13.40
  -1  -4  -1  282.07   12.00
  -1   4  -2   -0.30    1.60
  -1   4  -2   -2.00    3.20
   1   4   2   -0.90    2.30
   1   4   2   -0.90    1.70
   1   4   2    2.30    2.00
  -1   4  -2   -0.60    1.80
   1  -4   2   -1.40    1.70
  -1  -4  -2   -0.60    2.10
  -1  -4  -2   -1.80    2.20
   1  -4   2   -1.00    1.70
  -1  -4  -2   -1.10    1.60
   1   4   3 2415.26   75.99
   1   4   3 2408.56   77.79
  -1   4  -3 2406.96   81.79
  -1   4  -3 2391.46   75.99
   1   4   3 2321.37   77.09
   1  -4   3 2571.94   77.09
  -1  -4  -3 2370.36   76.79
  -1  -4  -3 2322.57   78.09
   1  -4   3 2284.97   74.99
  -1  -4  -3 2293.57   75.89
   1   4   4   97.69    8.80
   1   4   4   90.69    7.40
  -1   4  -4   96.39   13.30
   1   4   4   79.89    8.40
   1   4   4   90.29    8.40
  -1   4  -4   94.99    7.50
   1  -4   4   78.79    6.50
   1  -4   4   85.99   11.70
  -1  -4  -4   92.79    8.10
   1  -4   4   92.59    8.10
  -1  -4  -4   96.99    9.60
  -1  -4  -4  100.99    8.10
   1  -4   4   89.99    7.90
  -1   4  -5 1077.59   38.00
   1   4   5 1069.19   39.60
  -1   4  -5  995.20   45.30
   1   4   5 1072.49   37.70
   1   4   5 1056.49   39.30
   1  -4   5 1078.49   39.20
  -1  -4  -5 1045.00   38.70
  -1  -4  -5 1090.79   40.80
   1  -4   5 1109.59   38.60
  -1  -4  -5 1095.09   38.90
   1  -4   5 1065.79   44.10
   1   4   6  489.25   21.50
  -1   4  -6  525.35   21.60
   1   4   6  490.65   22.90
   1   4   6  506.45   22.90
  -1  -4  -6  523.65   22.60
   1  -4   6  533.75   22.90
  -1  -4  -6  513.65   24.60
   1  -4   6  462.45   28.20
  -1  -4  -6  485.85   22.90
   1   4   7   27.10    6.30
   1   4   7   22.20    5.10
   1   4   7   42.60    6.50
  -1   4  -7   23.20    4.80
   1  -4   7   24.80    6.00
  -1  -4  -7   27.50    5.30
  -1  -4  -7   22.10    5.80
  -1  -4  -7   21.00    5.60
   1  -4   7   15.30    7.30
   1   4   8    2.90    4.00
  -1   4  -8    0.80    4.30
   1   4   8   -2.20    4.20
  -1   4  -8   -0.90    3.50
  -1   4  -8   -2.50    5.50
   1   4   8    1.10    3.20
  -1  -4  -8    0.20    4.40
  -1  -4  -8    3.80    3.60
   1  -4   8   -4.60    3.80
   1  -4   8   -5.80    5.70
  -1  -4  -8   -0.40    3.80
  -1  -4  -8    3.20    4.20
   1   4   9  365.66   19.90
   1   4   9  334.47   20.00
   1   4   9  370.46   22.40
  -1   4  -9  394.06   20.10
  -1   4  -9  348.47   20.70
  -1  -4  -9  358.16   20.50
  -1  -4  -9  396.66   22.00
   1  -4   9  396.26   37.80
   1  -4   9  291.27   27.30
  -1  -4  -9  373.16   20.10
  -1  -4  -9  380.86   24.80
   1   4  10  377.56   21.80
   1   4  10  352.16   20.30
  -1   4 -10  358.66   21.00
   1   4  10  407.66   25.90
  -1   4 -10  376.06   22.20
  -1  -4 -10  382.36   23.30
   1  -4  10  380.36   22.50
  -1  -4 -10  369.56   21.20
   1  -4  10  373.16   28.30
  -1  -4 -10  385.56   24.30
  -1  -4 -10  364.06   21.70
   1   4  11   46.10   11.50
  -1   4 -11   35.10   12.40
  -1   4 -11   49.00    9.30
  -1  -4 -11   45.60    8.60
  -1  -4 -11   50.59    9.80
  -1  -4 -11   33.30    8.80
  -1   4 -12  532.85   28.10
  -1   4 -12  534.05   29.30
  -1  -4 -12  542.35   31.50
  -1  -4 -12  521.45   31.00
  -1  -4 -12  517.85   28.50
   1  -4  12  536.15   26.30
   1  -4  12  505.05   35.60
  -1   4 -13    3.80    5.70
   1   4  13   -2.20   11.00
  -1   4 -13   -6.60    7.30
  -1  -4 -13   -2.70    7.00
   1  -4  13   -3.90    5.70
  -1  -4 -13   -2.30    8.30
  -1   4 -14   54.69   11.60
  -1   4 -14   92.89   14.70
   1  -4  14   55.79   11.60
   1  -4  14   45.50   14.90
  -1  -4 -14   62.09   13.20
  -1  -4 -14   68.19   13.70
  -1   4 -15    0.80    7.10
   1   4  15   24.90   12.00
  -1   4 -15   -3.20    8.30
  -1  -4 -15    1.00    9.00
  -1  -4 -15    6.70    7.30
   1  -4  15   -3.40   10.10
  -1  -4 -15   -0.10    9.10
   1  -4  15    5.70    6.80
   1   4  16   47.40   14.50
  -1   4 -16   63.49   13.10
  -1   4 -16   58.79   11.60
   1  -4  16   65.19   16.80
  -1  -4 -16   67.69   13.60
  -1  -4 -16   67.99   12.00
   1  -4  16   76.59   12.90
  -1   4 -17    6.40    8.30
  -1   4 -17   18.80   10.00
   1   4  17   19.70   16.10
  -1  -4 -17  -13.20    8.40
  -1  -4 -17   -4.20    9.50
   1  -4  17   17.00   14.20
  -1   4 -18  220.38   23.60
  -1   4 -18  223.18   25.00
  -1  -4 -18  195.58   22.90
  -1  -4 -18  199.38   26.10
   1  -4  18  202.88   31.50
   1   5 -19   81.49   14.90
  -1   5  19   65.49   21.10
   1   5 -19   89.29   16.70
   1  -5 -19   63.59   16.40
   1  -5 -19   72.29   13.40
   1   5 -18   12.70   10.70
   1   5 -18   15.90   17.90
  -1   5  18   -6.70   18.50
  -1  -5  18   24.00    9.60
   1  -5 -18   22.20   10.70
   1  -5 -18   14.90   11.60
   1   5 -17  364.76   31.60
  -1   5  17  282.57   36.20
   1   5 -17  390.66   27.90
  -1  -5  17  355.26   23.00
   1  -5 -17  384.96   31.70
   1  -5 -17  299.57   27.50
   1   5 -16   23.00   10.10
   1   5 -16   16.00    8.70
  -1   5  16   17.00   15.60
  -1  -5  16   22.40    8.20
   1  -5 -16   15.60   10.40
   1  -5 -16    2.80    7.90
   1   5 -15  228.28   21.00
   1   5 -15  200.08   18.90
   1  -5 -15  211.68   22.10
   1  -5 -15  167.28   22.00
   1  -5 -15  182.68   25.90
  -1  -5  15  210.88   16.00
   1   5 -14   -2.10    7.30
  -1   5  14   -0.30    9.70
   1   5 -14   10.30    6.90
   1  -5 -14    2.50    7.40
   1  -5 -14    6.50    8.40
  -1  -5  14   10.70    5.60
   1  -5 -14    4.30    6.30
   1   5 -13   76.69   11.90
   1   5 -13   60.59   10.10
  -1  -5  13   76.29   11.20
   1  -5 -13   60.79   12.90
   1  -5 -13   67.59   13.50
   1  -5 -13   64.09   12.30
   1   5 -12   14.00    7.60
   1   5 -12   21.30    8.50
  -1   5  12   23.50   10.30
  -1  -5  12   17.20    5.40
   1  -5 -12    8.30    8.00
   1  -5 -12   21.30    9.20
   1   5 -11 1229.48   48.70
   1   5 -11 1264.87   49.10
  -1   5  11 1098.59   49.70
   1  -5 -11 1326.97   52.39
   1  -5 -11 1269.57   53.09
  -1  -5  11 1159.58   49.20
   1   5 -10  250.37   18.70
   1   5 -10  224.58   26.20
  -1   5  10  252.57   17.10
  -1   5  10  245.68   18.80
  -1   5  10  247.38   16.50
   1  -5 -10  254.47   20.10
  -1  -5  10  255.77   17.70
   1  -5 -10  272.87   19.60
   1  -5 -10  267.87   18.50
  -1   5   9  649.64   29.40
  -1   5   9  667.73   30.10
   1   5  -9  697.43   30.30
  -1   5   9  677.43   29.80
   1  -5  -9  694.93   30.70
  -1  -5   9  645.14   30.40
   1  -5  -9  765.22   37.70
   1  -5  -9  762.52   35.90
  -1   5   8   10.90    7.10
   1   5  -8   -2.60    9.40
  -1   5   8    8.40    4.30
   1   5  -8   23.30    5.30
  -1   5   8   15.70    4.70
   1  -5  -8    8.80    5.80
   1  -5  -8   13.10    6.00
  -1  -5   8   17.70    5.80
   1  -5  -8   18.00    5.70
  -1   5   7    8.60    3.60
  -1   5   7    5.60    3.70
   1   5  -7   12.30    4.50
  -1   5   7    5.10    3.90
   1   5  -7   -3.40    5.80
   1  -5  -7   -2.70    3.40
   1  -5  -7   -0.70    4.90
   1  -5  -7    2.40    4.70
  -1  -5   7    4.40    3.90
  -1  -5   7    7.20    2.50
  -1   5   6   -0.80    3.40
  -1   5   6   -3.10    3.20
   1   5  -6    2.90    5.40
   1   5  -6    5.20    3.60
  -1   5   6    3.00    3.20
   1  -5  -6   -5.00    4.20
  -1  -5   6    2.20    3.20
   1  -5  -6   -5.90    3.40
   1  -5  -6   -1.80    4.00
  -1  -5   6    3.00    2.20
  -1  -5   6   -4.90    3.10
  -1   5   5  906.51   34.90
   1   5  -5  941.91   34.70
   1   5  -5  877.51   40.40
  -1   5   5  909.81   34.50
  -1   5   5  908.51   34.10
   1  -5  -5  915.01   35.10
  -1  -5   5  963.30   35.80
   1  -5  -5  998.20   37.40
   1  -5  -5  914.81   35.10
  -1  -5   5  963.60   34.70
  -1  -5   5  918.31   31.70
   1   5  -4   63.39    8.10
   1   5  -4   65.19   11.90
  -1   5   4   78.49    9.60
  -1   5   4   78.49    7.90
  -1  -5   4   58.09    8.50
   1  -5  -4   73.49    8.30
  -1  -5   4   75.19    7.80
   1  -5  -4   76.89    9.40
   1  -5  -4   64.79    8.20
  -1  -5   4   67.79    6.40
   1   5  -3  248.38   12.70
  -1   5   3  252.47   13.10
  -1   5   3  212.78   13.30
   1   5  -3  200.08   10.80
  -1  -5   3  217.58   11.20
   1  -5  -3  231.48   12.40
   1  -5  -3  230.78   12.40
  -1  -5   3  248.38   13.40
   1  -5  -3  229.28   13.70
   1   5  -2   52.69    6.40
  -1   5   2   44.60    6.70
   1   5  -2   45.60    6.80
   1  -5  -2   59.39    6.50
  -1  -5   2   44.90    5.90
  -1  -5   2   48.30    6.80
   1  -5  -2   59.59    7.20
   1  -5  -2   42.30    6.10
   1   5  -1    1.30    2.50
   1   5  -1   -0.50    2.10
  -1   5   1    0.60    2.90
  -1   5   1    4.20    2.30
  -1  -5   1    0.40    2.30
   1  -5  -1    2.70    2.60
  -1  -5   1    1.80    2.60
   1  -5  -1    0.60    2.50
   1   5   0   73.49    7.20
   1   5   0   77.69    6.60
  -1   5   0   80.19    6.70
  -1   5   0   73.19    7.20
  -1  -5   0   79.49    7.30
   1  -5   0   66.49    6.70
  -1  -5   0   72.69    7.00
   1  -5   0   62.99    6.90
  -1   5  -1   -4.30    3.60
  -1   5  -1   -1.20    2.20
   1   5   1    2.30    2.80
  -1   5  -1   -2.20    2.40
   1  -5   1    0.60    2.30
  -1  -5  -1    0.70    2.20
  -1  -5  -1    1.50    2.30
  -1  -5  -1   -2.90    2.60
   1  -5   1    0.30    2.50
  -1   5  -2   25.70    6.20
  -1   5  -2   44.30    6.10
   1   5   2   36.30    5.70
  -1   5  -2   39.70    5.40
  -1  -5  -2   54.09    7.50
   1  -5   2   26.20    4.10
  -1  -5  -2   48.20    5.90
   1  -5   2   26.10    4.60
  -1  -5  -2   41.70    6.40
   1   5   3  273.97   13.30
  -1   5  -3  288.17   13.90
   1   5   3  281.17   14.80
   1   5   3  274.97   15.40
  -1   5  -3  292.07   19.70
  -1  -5  -3  259.07   13.50
  -1  -5  -3  280.07   14.50
   1  -5   3  285.57   14.70
  -1  -5  -3  282.37   16.10
   1  -5   3  269.47   13.30
  -1   5  -4  113.59   14.80
   1   5   4   82.79    9.90
   1   5   4  101.99    8.20
  -1   5  -4   93.19    8.60
   1   5   4   99.09    9.40
  -1  -5  -4   83.79    9.10
   1  -5   4   88.99    7.50
   1  -5   4   85.09    9.10
  -1  -5  -4  106.99   10.90
  -1  -5  -4  102.49    9.30
   1  -5   4  106.69   10.00
   1   5   5  444.76   19.60
  -1   5  -5  413.66   29.00
  -1   5  -5  461.55   19.80
   1   5   5  458.95   21.90
   1   5   5  416.36   21.00
   1  -5   5  489.65   21.70
  -1  -5  -5  459.05   20.70
  -1  -5  -5  448.76   21.00
   1  -5   5  441.16   18.30
   1  -5   5  456.05   20.70
  -1  -5  -5  456.45   23.20
   1   5   6  611.54   25.90
  -1   5  -6  478.55   31.90
   1   5   6  589.54   26.20
   1   5   6  574.24   24.00
  -1   5  -6  595.54   24.40
  -1  -5  -6  580.34   25.60
   1  -5   6  560.54   22.40
  -1  -5  -6  586.54   25.30
   1  -5   6  621.04   26.10
   1  -5   6  573.24   25.00
  -1  -5  -6  627.44   28.10
   1   5   7   33.40    6.30
   1   5   7   55.09    9.10
  -1   5  -7   32.50    5.60
   1   5   7   34.20    5.50
  -1   5  -7   18.90   10.40
  -1  -5  -7   36.40    6.40
  -1  -5  -7   39.40    7.10
   1  -5   7   42.10    7.00
   1  -5   7   21.90    8.70
  -1  -5  -7   33.50    6.60
  -1   5  -8   -4.80    6.90
   1   5   8   11.10    4.90
  -1   5  -8    6.90    4.70
   1   5   8    9.90    5.10
   1   5   8   14.60    4.10
  -1  -5  -8    8.60    4.80
  -1  -5  -8    3.00    8.80
   1  -5   8   10.20    5.00
  -1  -5  -8    1.60    4.70
   1   5   9  795.92   33.60
   1   5   9  829.22   36.60
   1   5   9  823.92   35.90
  -1   5  -9  862.91   34.60
   1  -5   9  824.72   42.60
  -1  -5  -9  855.51   38.70
   1  -5   9  777.02   35.70
  -1  -5  -9  813.82   34.80
  -1   5 -10    7.80    5.50
   1   5  10   15.30    7.40
   1   5  10   11.00    5.50
  -1  -5 -10   13.60    6.90
   1  -5  10    6.20    7.10
   1  -5  10   13.00    9.60
  -1  -5 -10   20.10    7.10
  -1   5 -11  695.83   32.70
   1   5  11  706.63   37.10
   1  -5  11  703.63   43.00
  -1  -5 -11  692.93   35.80
  -1  -5 -11  727.83   37.70
   1   5  12    1.90   10.70
  -1   5 -12   18.00    7.50
   1  -5  12    6.10   10.30
  -1  -5 -12   11.70    7.00
  -1  -5 -12    3.90    7.90
  -1  -5 -12   24.30    9.40
  -1   5 -13  -11.80    7.20
  -1   5 -13  -11.10    5.10
  -1   5 -14   -3.10    7.20
  -1   5 -14    1.70    6.80
   1  -5  14   -8.60   10.20
  -1  -5 -14   -2.00    8.10
  -1  -5 -14   -1.60    6.50
   1  -5  14  -16.80   10.50
  -1   5 -15  311.67   25.20
  -1   5 -15  327.77   23.50
  -1  -5 -15  304.97   27.00
  -1  -5 -15  276.37   25.30
   1  -5  15  329.27   22.10
   1  -5  15  281.47   32.70
  -1   5 -16   -3.00    7.20
  -1   5 -16    9.50   10.30
   1   5  16   15.40   11.20
  -1  -5 -16   -4.60    8.00
  -1  -5 -16    0.70   15.20
   1  -5  16    9.40    8.00
   1  -5  16   11.00   11.40
  -1   5 -17  164.18   21.60
   1   5  17  149.99   29.20
  -1   5 -17  184.58   20.90
  -1  -5 -17  186.18   23.30
  -1  -5 -17  179.08   24.90
   1   5  18    1.30   18.00
  -1   5 -18   -4.00   14.30
  -1  -5 -18    8.30   12.50
  -1  -5 -18  -12.40    9.20
  -1   6  18    1.80   19.80
   1   6 -18   40.50   12.20
   1  -6 -18   38.30   14.70
  -1  -6  18   50.29   10.00
  -1   6  17   19.70   17.30
   1   6 -17   31.20   11.20
   1  -6 -17   31.90   13.20
   1   6 -16   15.60    8.60
  -1  -6  16   -0.10    7.10
   1  -6 -16   -5.50    7.90
   1  -6 -16   -4.90   13.30
   1   6 -15   14.40    7.80
  -1   6  15   34.60   11.70
  -1  -6  15   14.80    6.50
   1  -6 -15   -3.90    9.00
   1  -6 -15   -6.40    7.80
   1   6 -14   27.60    8.30
  -1   6  14   31.90   11.90
  -1  -6  14   25.50    7.10
   1  -6 -14   19.30    9.30
   1  -6 -14   29.20   10.50
   1   6 -13   50.69    9.80
   1  -6 -13   34.20   10.60
  -1  -6  13   67.29   10.40
   1  -6 -13   47.70   11.80
  -1   6  12  114.79   19.90
   1   6 -12  130.99   15.00
   1  -6 -12  117.49   16.60
   1  -6 -12  117.39   18.00
   1   6 -11  459.65   26.00
  -1   6  11  488.25   27.20
   1  -6 -11  451.35   30.20
  -1  -6  11  474.25   27.90
   1  -6 -11  463.85   27.80
  -1   6  10    8.10    5.60
   1   6 -10   -0.40    6.10
  -1  -6  10   -0.40    3.30
   1  -6 -10   -3.30    5.60
   1  -6 -10    2.80    6.50
  -1  -6  10   -8.20    6.50
   1   6  -9  156.08   25.00
  -1   6   9  224.68   16.60
   1   6  -9  226.48   19.90
  -1   6   9  233.28   15.80
  -1   6   9  191.68   15.00
  -1  -6   9  219.68   12.00
   1  -6  -9  244.98   19.20
   1  -6  -9  209.28   17.90
   1  -6  -9  245.98   17.90
  -1  -6   9  239.08   19.50
  -1   6   8  167.98   13.20
  -1   6   8  149.88   13.40
  -1   6   8  173.98   12.70
   1   6  -8  127.69   19.40
   1   6  -8  156.78   13.20
   1  -6  -8  164.68   13.90
   1  -6  -8  178.68   14.80
   1  -6  -8  163.48   15.50
  -1  -6   8  162.68    9.90
  -1  -6   8  175.48   14.30
  -1   6   7  158.78   11.30
   1   6  -7  150.18   17.80
  -1   6   7  152.58   12.00
   1   6  -7  139.49   11.70
  -1   6   7  142.79   11.60
  -1  -6   7  131.29   11.70
  -1  -6   7  157.78   12.70
   1  -6  -7  148.29   12.90
  -1  -6   7  152.38    9.00
   1  -6  -7  151.78   12.30
   1  -6  -7  136.29   14.50
  -1   6   6    2.70    3.70
  -1   6   6   -0.40    3.00
   1   6  -6   12.40    6.00
  -1   6   6    4.00    3.70
   1   6  -6    7.20    3.70
  -1  -6   6   -0.60    3.80
   1  -6  -6    6.10    4.50
   1  -6  -6    0.80    3.80
  -1  -6   6    6.00    2.80
   1  -6  -6   -0.80    4.30
  -1  -6   6    5.10    4.00
  -1   6   5 2061.59   72.99
   1   6  -5 2077.19   70.69
  -1   6   5 2093.79   71.29
   1   6  -5 2031.30   77.49
  -1  -6   5 2160.88   71.09
   1  -6  -5 2153.38   71.39
  -1  -6   5 2104.69   67.99
   1  -6  -5 2106.19   73.79
   1  -6  -5 2137.19   71.49
  -1  -6   5 2169.38   72.59
   1   6  -4  129.19   15.20
   1   6  -4  136.49   11.00
  -1   6   4  129.39   12.20
  -1   6   4  137.49   10.90
   1  -6  -4  128.49   12.20
  -1  -6   4  130.69   11.90
  -1  -6   4  119.09    9.30
   1  -6  -4  114.79   10.90
   1  -6  -4  139.59   10.90
  -1   6   3 3688.73  116.09
   1   6  -3 3598.04  115.39
  -1   6   3 3589.24  117.49
   1   6  -3 3349.86  113.29
   1  -6  -3 3583.14  115.69
  -1  -6   3 3668.83  114.09
   1  -6  -3 3806.02  118.09
   1  -6  -3 3660.13  115.19
  -1  -6   3 3661.73  116.99
   1   6  -2   65.49    8.60
  -1   6   2   61.49    9.40
   1   6  -2   58.09    7.10
  -1  -6   2   52.99    7.80
  -1  -6   2   50.79    7.30
   1  -6  -2   68.09    8.10
   1  -6  -2   82.49    9.30
   1  -6  -2   53.19    8.00
  -1   6   1   39.20    6.30
   1   6  -1   22.30    4.00
   1   6  -1   31.00    5.40
  -1   6   1   23.80    5.80
   1  -6  -1   29.10    5.20
  -1  -6   1   24.70    5.30
   1  -6  -1   21.30    5.10
  -1  -6   1   16.60    4.50
   1   6   0   10.70    4.30
  -1   6   0    3.20    4.30
   1   6   0   10.00    3.40
  -1   6   0    5.70    3.30
   1  -6   0   -3.60    3.60
  -1  -6   0    3.10    4.10
  -1  -6   0    6.20    3.90
   1  -6   0    7.00    4.10
  -1   6  -1  993.60   41.50
  -1   6  -1  994.10   36.60
  -1   6  -1 1059.39   37.50
   1   6   1 1058.09   37.20
   1   6   1 1024.90   38.40
  -1  -6  -1 1055.99   38.60
   1  -6   1 1039.70   37.20
  -1  -6  -1 1004.90   35.60
  -1  -6  -1 1012.10   37.50
   1  -6   1 1015.10   37.50
   1   6   2   58.89    9.30
  -1   6  -2   83.69    8.70
  -1   6  -2   69.09    7.30
   1   6   2   83.19    7.90
   1  -6   2   54.09    8.80
  -1  -6  -2   66.19    8.50
   1  -6   2   60.39    8.50
  -1  -6  -2   67.89    7.80
  -1  -6  -2   86.29   10.00
  -1   6  -3 3197.58  102.99
   1   6   3 3184.18  105.69
  -1   6  -3 3106.69  109.79
   1   6   3 3251.57  104.19
  -1   6  -3 3084.99  102.29
  -1  -6  -3 3303.07  106.29
  -1  -6  -3 3205.38  103.99
  -1  -6  -3 3362.26  103.09
   1  -6   3 3297.07  104.69
   1  -6   3 3228.98  102.49
  -1   6  -4   14.90    6.80
   1   6   4   19.80    4.20
   1   6   4   16.30    5.40
  -1   6  -4   17.90    4.40
   1   6   4   13.20    4.20
   1  -6   4   16.30    4.60
  -1  -6  -4   16.40    5.60
   1  -6   4   11.70    3.90
  -1  -6  -4   15.30    4.90
  -1  -6  -4   13.40    4.40
  -1   6  -5  822.62   31.70
   1   6   5  798.72   34.30
   1   6   5  769.62   32.60
   1   6   5  836.22   31.20
   1   6   5  839.52   34.10
  -1   6  -5  817.72   40.40
  -1  -6  -5  795.22   32.30
   1  -6   5  824.32   33.40
  -1  -6  -5  836.22   32.70
   1  -6   5  864.81   33.30
  -1  -6  -5  831.22   35.40
   1  -6   5  802.72   30.10
  -1   6  -6    6.40    3.90
   1   6   6   -3.80    5.50
   1   6   6    0.30    3.10
   1   6   6    7.50    4.60
   1  -6   6    3.50    2.80
  -1  -6  -6    2.50    4.30
   1  -6   6    1.10    4.50
   1  -6   6   -5.10    3.20
  -1  -6  -6    0.10    4.60
  -1  -6  -6   -4.10    7.10
  -1   6  -7  152.28   12.50
   1   6   7  145.19   11.40
   1   6   7  158.58   13.70
   1   6   7  161.48   13.10
  -1  -6  -7  161.48   13.90
  -1  -6  -7  143.19   12.90
  -1  -6  -7  160.88   16.60
   1  -6   7  151.08   12.80
   1  -6   7  166.88   10.60
   1  -6   7  149.88   13.60
  -1   6  -8   21.00    6.40
   1   6   8   25.80    6.10
   1   6   8   28.50    6.60
   1   6   8   31.20    7.50
  -1  -6  -8   25.70    7.20
  -1  -6  -8   26.90    7.10
   1  -6   8   39.50   13.20
   1  -6   8   26.40    5.00
  -1  -6  -8   22.60    7.60
   1   6   9 1144.09   46.80
   1   6   9 1167.38   44.90
  -1   6  -9 1167.08   46.00
  -1  -6  -9 1163.18   50.19
   1  -6   9 1146.39   47.60
  -1  -6  -9 1205.78   48.40
  -1   6 -10   -0.40    6.20
   1   6  10   10.80    7.30
  -1  -6 -10    9.90    7.30
   1  -6  10    0.60    8.10
  -1  -6 -10   15.20    7.20
   1   6  11  127.69   18.50
  -1  -6 -11  156.98   18.10
  -1  -6 -11  127.49   18.20
   1   6  12   60.39   14.00
  -1  -6 -12   57.59   12.10
  -1  -6 -12   65.89   12.20
   1   6  13  -19.40   12.40
  -1   6 -13    5.70    6.60
  -1  -6 -13   -6.30    6.90
  -1  -6 -13   -7.20    7.00
  -1   6 -14   12.70    7.10
   1   6  14    3.10   13.10
  -1  -6 -14   -7.60    8.60
  -1  -6 -14    9.70    9.90
   1  -6  14   13.50   11.00
   1   6  15   16.90   12.70
  -1   6 -15   24.80    9.10
   1  -6  15   24.40    8.60
  -1  -6 -15   22.90   11.60
   1   6  16    9.10   12.00
  -1   6 -16   11.50    8.50
  -1  -6 -16    3.90    9.90
   1  -6  16   19.00    9.30
  -1   6 -17    0.70    8.20
   1   6  17   27.80   14.90
  -1  -6 -17   -4.30    8.60
  -1  -6 -17   -8.60   11.30
   1   6  18   41.90   17.80
  -1   6 -18   84.59   14.60
  -1  -6 -18   40.90   15.50
  -1  -6 -18   79.69   14.00
  -1   7  18   -1.80   18.10
   1   7 -18   10.70    9.60
   1  -7 -18   12.70   13.30
   1   7 -17   29.30   14.40
  -1   7  17   38.10   15.10
   1  -7 -17   36.40   15.40
  -1  -7  17   37.10    9.40
   1  -7 -17   21.10   12.10
   1   7 -16  -14.80    8.30
  -1  -7  16    3.30    7.90
   1  -7 -16    2.90    9.90
   1  -7 -16   12.10   10.40
   1   7 -15   -8.60    7.60
  -1   7  15   -6.70    9.70
  -1  -7  15  -11.30    6.30
  -1  -7  15    1.10    4.60
   1  -7 -15   -7.40    8.20
   1  -7 -15    0.80   10.10
   1   7 -14   26.30    8.80
  -1   7  14   14.60   12.60
   1  -7 -14    9.20    8.90
  -1  -7  14   11.80    6.20
  -1  -7  14   14.00    5.10
   1  -7 -14   -0.60    8.70
  -1   7  13   15.00   13.40
   1   7 -13   36.70    8.40
  -1  -7  13   27.10    5.60
   1  -7 -13   22.60   10.60
   1  -7 -13   13.30    9.60
  -1   7  12   -3.80    9.20
   1  -7 -12    9.00    9.10
   1  -7 -12   14.60    8.50
  -1  -7  12    8.40    4.10
  -1   7  11  128.19   16.40
   1   7 -11  154.68   15.30
   1  -7 -11  153.38   18.20
   1  -7 -11  136.89   19.40
  -1  -7  11  147.49   10.80
  -1   7  10    0.80    5.10
   1   7 -10  -11.20    5.30
   1  -7 -10   -1.60    6.60
   1  -7 -10   -1.80    6.30
  -1  -7  10  -13.30    6.30
  -1  -7  10   -4.80    3.80
  -1   7   9   43.10    7.20
   1   7  -9   34.40    8.30
   1  -7  -9   40.00    9.40
  -1  -7   9   48.30    7.30
   1  -7  -9   52.39    9.50
  -1  -7   9   55.79    9.80
  -1   7   8  141.29   12.90
  -1   7   8   92.49   11.90
   1   7  -8  118.69   12.90
   1  -7  -8  130.19   14.60
  -1  -7   8  120.69   13.00
  -1  -7   8  109.09   12.30
   1  -7  -8  130.29   15.60
  -1  -7   8  102.99    9.20
  -1   7   7    9.50    5.10
   1   7  -7    7.30    6.00
  -1   7   7    5.60    3.90
   1   7  -7   11.90    7.10
   1  -7  -7   15.00    5.50
  -1  -7   7    8.80    5.10
  -1  -7   7    2.80    5.40
   1  -7  -7    2.80    4.40
  -1  -7   7    1.60    3.40
   1  -7  -7   10.00    5.30
  -1   7   6  507.55   24.10
  -1   7   6  463.95   23.40
   1   7  -6  501.55   30.10
   1   7  -6  488.05   23.30
  -1  -7   6  509.35   23.80
   1  -7  -6  556.94   30.90
   1  -7  -6  475.15   23.40
   1  -7  -6  543.45   24.70
  -1  -7   6  518.75   20.90
   1   7  -5   17.20    4.80
  -1   7   5   11.90    4.40
   1   7  -5   28.90    7.60
  -1   7   5   13.20    5.70
  -1  -7   5   22.10    5.60
  -1  -7   5   20.00    5.00
   1  -7  -5   19.30    5.60
   1  -7  -5    6.00    5.20
   1  -7  -5   15.00    4.70
  -1  -7   5   20.10    4.40
   1   7  -4   52.19    8.30
  -1   7   4   38.60    7.00
   1   7  -4   29.10    4.80
   1   7  -4   57.39   11.50
  -1   7   4   40.40    6.20
   1  -7  -4   41.90    6.80
  -1  -7   4   35.10    5.20
  -1  -7   4   35.00    6.90
   1  -7  -4   52.29    8.20
   1  -7  -4   29.10    6.70
   1   7  -3   89.09    9.60
  -1   7   3   67.49   10.40
  -1   7   3   75.39    9.50
   1   7  -3   59.69    7.40
  -1  -7   3   70.99    8.40
  -1  -7   3   74.79   10.10
   1  -7  -3   70.09    9.00
   1  -7  -3   83.09   11.00
   1  -7  -3   70.09    8.60
   1   7  -2  710.43   29.70
  -1   7   2  722.73   31.40
  -1   7   2  763.62   30.00
   1   7  -2  746.13   28.50
   1  -7  -2  758.62   29.20
  -1  -7   2  737.83   29.30
   1  -7  -2  789.42   31.70
  -1  -7   2  747.43   31.00
   1  -7  -2  724.93   29.60
  -1   7   1  112.39    9.70
   1   7  -1  113.79   11.00
   1   7  -1  125.49    9.30
  -1   7   1  105.39   11.30
   1  -7  -1  125.39   11.50
   1  -7  -1  112.79   10.20
  -1  -7   1  118.69   10.70
  -1  -7   1   95.59   10.40
   1   7   0  924.71   37.10
  -1   7   0  973.20   36.20
  -1   7   0  997.80   37.40
   1   7   0  950.00   35.70
  -1  -7   0  983.30   37.50
   1  -7   0  990.70   36.90
   1  -7   0  994.50   37.20
  -1  -7   0  950.40   37.00
   1   7   1  106.19    9.60
  -1   7  -1  107.39    9.00
   1   7   1   97.69   10.60
  -1   7  -1   93.09   10.10
  -1   7  -1  109.79   13.50
  -1  -7  -1  105.99    8.90
   1  -7   1  109.29   10.30
   1  -7   1  115.99   10.30
  -1  -7  -1   92.19   10.00
  -1  -7  -1   96.89   10.70
  -1   7  -2   -0.60    5.50
  -1   7  -2   -1.30    3.60
   1   7   2    2.20    3.30
  -1   7  -2    0.90    3.10
   1   7   2   -1.00    4.90
  -1  -7  -2   -2.80    4.00
  -1  -7  -2    1.70    4.30
  -1  -7  -2    4.40    3.60
   1  -7   2   -0.90    3.90
   1  -7   2   -2.00    4.00
   1   7   3   11.70    4.00
  -1   7  -3   11.30    6.00
  -1   7  -3   12.40    4.30
   1   7   3    4.30    4.80
  -1  -7  -3    8.50    4.30
   1  -7   3   13.80    4.30
  -1  -7  -3    8.40    4.80
   1  -7   3   11.20    4.10
  -1  -7  -3   13.30    4.00
  -1   7  -4  523.15   22.80
   1   7   4  499.95   25.40
  -1   7  -4  528.05   30.60
   1   7   4  511.75   23.90
   1  -7   4  522.15   22.20
  -1  -7  -4  501.15   28.00
   1  -7   4  524.15   24.10
  -1  -7  -4  517.75   26.00
  -1  -7  -4  528.05   23.00
   1   7   5    7.50    3.80
  -1   7  -5    7.60    7.00
  -1   7  -5    6.40    4.30
  -1  -7  -5    5.20    5.10
   1  -7   5   -1.10    3.90
  -1  -7  -5    4.80    3.90
   1  -7   5   -0.10    3.10
  -1  -7  -5    4.80    4.10
   1  -7   5   -1.30    4.80
   1   7   6  521.95   23.20
  -1   7  -6  504.45   23.60
   1   7   6  502.35   24.50
  -1   7  -6  489.75   33.30
   1   7   6  532.75   26.60
  -1  -7  -6  498.95   27.30
  -1  -7  -6  469.65   23.90
   1  -7   6  546.65   22.40
   1  -7   6  515.35   24.80
   1  -7   6  504.05   25.70
  -1  -7  -6  542.75   24.90
  -1   7  -7   21.10   12.90
   1   7   7   45.60    7.70
   1   7   7   61.89   11.00
  -1   7  -7   44.60    7.80
   1   7   7   72.29   10.10
   1  -7   7   57.09   10.20
   1  -7   7   49.00   11.40
  -1  -7  -7   49.60    9.20
   1  -7   7   40.10    6.10
  -1  -7  -7   67.79   10.30
  -1  -7  -7   47.80    8.20
   1   7   8    0.80    4.60
  -1   7  -8  -11.70    9.10
   1   7   8    1.70    5.40
  -1  -7  -8   -0.10    6.60
   1  -7   8   -3.50    3.80
   1  -7   8   -6.90    5.70
  -1  -7  -8   -4.50    5.90
   1   7   9   37.50    6.70
  -1   7  -9   24.00    7.50
   1   7   9   59.79   12.20
  -1  -7  -9   29.80    9.60
   1  -7   9   50.79    8.20
  -1  -7  -9   37.40    8.60
   1  -7   9   33.80    8.70
  -1   7 -10  761.52   34.50
   1   7  10  802.02   37.60
  -1  -7 -10  751.92   40.60
   1  -7  10  761.82   31.10
  -1  -7 -10  841.72   39.50
  -1   7 -11   10.90    6.40
  -1  -7 -11   -7.50    7.00
  -1  -7 -11   -4.60    7.10
   1  -7  11   -8.10    4.20
  -1   7 -12  169.08   16.50
   1   7  12  120.29   20.70
   1  -7  12  138.29   12.70
  -1  -7 -12  137.09   20.10
  -1  -7 -12  154.78   19.70
  -1   7 -13    8.00    6.50
   1   7  13  -17.90   13.50
  -1  -7 -13   -4.80    7.20
  -1  -7 -13   -9.10    7.30
   1   7  14  -18.50   13.30
  -1   7 -14   -5.50    6.70
  -1  -7 -14  -10.10    8.70
  -1  -7 -15  -13.20   13.40
  -1  -7 -15  -16.40    9.20
   1  -7  15  -12.20    7.20
   1   7  16   32.00   14.10
  -1   7 -16   -6.60    7.80
   1  -7  16    9.70    9.80
  -1  -7 -16   -0.60   10.60
  -1   7 -17  -17.30   13.10
   1   7  17   24.60   12.90
  -1  -7 -17   -2.70   11.40
   1   8 -17  -10.10    8.40
  -1   8  17   33.40   14.90
  -1  -8  17   10.50   10.20
   1  -8 -17  -19.50   10.30
   1  -8 -17  -17.60   11.10
  -1  -8  17   -9.70    5.60
   1   8 -16   20.20   13.20
   1  -8 -16   24.00   13.00
  -1  -8  16   15.80    8.90
   1  -8 -16   29.10   12.90
  -1  -8  16   16.00    6.30
   1   8 -15    2.80    7.90
  -1   8  15   -0.70   11.60
  -1  -8  15   -3.40    7.30
   1  -8 -15   10.70   10.60
  -1  -8  15   -0.20    5.00
   1   8 -14   39.30    9.90
  -1  -8  14   38.40    6.20
   1  -8 -14   31.50   12.10
   1  -8 -14   36.40   12.50
   1   8 -13    6.80    7.00
  -1   8  13   -9.00   11.10
   1  -8 -13    4.00    9.50
  -1  -8  13    1.70    4.40
   1  -8 -13   -9.10    7.60
  -1   8  12  112.39   18.50
   1   8 -12  158.18   16.00
   1  -8 -12   86.39   15.20
   1  -8 -12  121.89   19.60
  -1  -8  12  139.49   11.30
   1   8 -11    6.90    5.80
  -1   8  11   -7.80    7.40
  -1  -8  11    2.80    4.10
   1  -8 -11   -0.60    8.20
   1  -8 -11   -8.20    7.20
   1   8 -10   31.30    7.80
  -1   8  10   22.00    7.60
  -1  -8  10   28.80   10.40
   1  -8 -10   24.50    9.70
   1  -8 -10   30.10    9.40
  -1  -8  10   30.80    5.60
  -1   8   9   -3.80    5.10
   1  -8  -9   -8.60    6.70
  -1  -8   9  -11.40    6.00
   1  -8  -9   -8.90    6.20
  -1   8   8   -1.30    4.80
  -1  -8   8   -7.10    9.00
   1  -8  -8  -10.50    5.40
   1   8  -7   15.40    6.70
   1  -8  -7   25.00    8.60
   1  -8  -7   18.90    7.60
  -1  -8   7   18.00    4.70
  -1  -8   7   17.00    6.90
  -1  -8   7   15.60    6.70
  -1   8   6   86.89   12.80
  -1   8   6   73.69   12.50
   1   8  -6   74.59   11.00
   1   8  -6  116.49   22.80
   1  -8  -6  100.79   11.30
  -1  -8   6   80.89    9.60
   1  -8  -6   58.69   10.30
  -1  -8   6   76.59   11.20
  -1  -8   6   82.89   11.70
   1   8  -5   10.60    6.30
   1   8  -5   19.10    6.70
  -1   8   5    6.00    5.60
  -1   8   5    6.00    4.70
  -1  -8   5    5.20    5.20
   1  -8  -5   14.60    4.80
   1  -8  -5   11.10    5.10
  -1  -8   5    5.30    4.60
   1  -8  -5    2.20    5.80
  -1  -8   5    6.90    4.50
  -1   8   4   25.80    5.80
   1   8  -4   29.60    5.10
   1   8  -4   30.30    7.20
  -1   8   4   21.30    6.70
   1  -8  -4   20.80    8.30
   1  -8  -4   29.10    6.00
  -1  -8   4   23.80    6.00
   1  -8  -4   29.80    5.90
  -1  -8   4   30.30    5.90
   1   8  -3   25.10    5.70
   1   8  -3   19.20    4.40
  -1   8   3   19.10    5.50
   1  -8  -3   22.40    5.20
   1  -8  -3   17.60    7.10
  -1  -8   3   14.70    4.80
  -1  -8   3   22.90    6.10
   1  -8  -3   29.80    5.70
   1   8  -2   -1.50    3.70
   1   8  -2    1.50    3.00
  -1   8   2   -7.30    3.90
  -1   8   2   -5.10    2.90
   1  -8  -2   -4.50    3.10
   1  -8  -2   -4.00    3.40
  -1  -8   2   -5.10    3.70
   1   8  -1    8.30    3.60
   1   8  -1    4.00    4.30
  -1   8   1    6.10    3.40
  -1   8   1    7.20    5.10
   1  -8  -1    4.00    4.70
  -1  -8   1    1.70    4.60
  -1  -8   1   -0.10    4.20
   1  -8  -1   -7.10    5.40
   1   8   0    0.20    3.40
   1   8   0    0.00    4.20
  -1   8   0    3.10    4.40
  -1   8   0   -2.80    3.20
   1  -8   0   -4.70    4.00
  -1  -8   0   -3.00    3.80
   1  -8   0    1.00    3.90
  -1  -8   0    0.60    4.70
  -1   8  -1   89.59   10.20
  -1   8  -1   92.59   13.30
  -1   8  -1   90.49    9.10
   1   8   1   87.79    9.30
   1   8   1   76.99   11.30
  -1  -8  -1   96.79    8.90
  -1  -8  -1   76.79    9.60
   1  -8   1  108.39   11.20
   1  -8   1   97.49   10.90
  -1  -8  -1   82.79   11.50
  -1   8  -2   14.50    6.80
  -1   8  -2    4.60    4.60
   1   8   2   12.00    4.20
  -1   8  -2    7.30    3.40
  -1  -8  -2   10.10    4.10
  -1  -8  -2   -3.90    4.20
  -1  -8  -2    8.40    4.80
   1  -8   2    3.70    4.10
   1  -8   2    2.70    4.50
   1   8   3   27.20    7.50
  -1   8  -3   58.99    9.20
   1   8   3   40.10    6.60
  -1   8  -3   45.30    7.40
  -1   8  -3   62.09   12.50
  -1  -8  -3   61.09    8.20
  -1  -8  -3   33.60    6.30
   1  -8   3   34.10    9.40
  -1  -8  -3   30.10    7.60
   1  -8   3   37.90    6.90
   1   8   4   56.69    9.70
  -1   8  -4   69.59   10.00
   1   8   4   68.79    9.50
  -1  -8  -4   89.29    9.90
   1  -8   4   84.99    9.90
   1  -8   4   59.79   10.60
  -1  -8  -4   60.99    9.50
  -1  -8  -4   49.99    9.00
  -1   8  -5   23.50    9.30
   1   8   5   13.60    7.00
   1   8   5   18.40    5.00
  -1   8  -5   25.80    6.40
  -1  -8  -5   20.40    7.20
   1  -8   5   19.60    6.10
   1  -8   5   21.70    5.10
   1  -8   5   19.50    6.40
  -1  -8  -5   19.20    6.40
  -1  -8  -5   18.80    5.30
   1   8   6    5.90    6.80
  -1   8  -6   14.00    8.50
   1   8   6   22.90    6.70
   1  -8   6   18.80    4.70
  -1  -8  -6   20.00    6.50
   1  -8   6   16.90    8.10
   1  -8   6   20.80    6.10
  -1  -8  -6    5.50    6.50
   1   8   7  147.09   13.00
  -1   8  -7  137.69   13.90
   1   8   7  176.68   15.80
  -1  -8  -7  139.59   17.00
   1  -8   7  171.38   12.60
  -1  -8  -7  159.28   21.80
   1  -8   7  177.38   15.30
   1  -8   7  159.28   15.10
   1   8   8   32.60    8.60
   1   8   8   16.10    6.80
  -1   8  -8   16.70    7.30
  -1  -8  -8   11.20    7.70
  -1  -8  -8   30.90    8.60
   1  -8   8   20.50    5.70
   1  -8   8    9.70    7.90
   1  -8   8    5.60    7.00
  -1   8  -9  183.68   16.30
   1   8   9  173.68   18.40
  -1  -8  -9  173.88   19.00
   1  -8   9  175.58   14.00
  -1  -8  -9  143.89   19.90
   1   8  10  207.08   20.70
  -1   8 -10  232.78   17.80
  -1  -8 -10  240.48   22.70
  -1  -8 -10  221.78   24.30
   1  -8  10  229.28   15.40
  -1   8 -11   28.20    7.90
   1   8  11   12.90   10.00
  -1  -8 -11   14.20   10.40
   1  -8  11   13.20    5.70
  -1  -8 -11   12.70    9.80
  -1   8 -12  255.17   19.60
   1   8  12  220.58   23.70
   1  -8  12  264.67   16.40
  -1  -8 -12  260.37   24.20
  -1  -8 -12  248.78   25.40
   1   8  13   75.09   20.20
  -1   8 -13   68.69   11.20
  -1  -8 -13   70.69   14.40
   1  -8  13   95.29   11.50
  -1  -8 -13   74.39   15.30
  -1   8 -14   16.00    7.10
  -1  -8 -14  -16.80    7.70
   1  -8  14   -2.90    5.40
  -1  -8 -14  -10.80   10.20
   1   8  15  -17.10   14.70
  -1   8 -15    9.40    7.70
  -1  -8 -15   -7.90   12.40
  -1  -8 -15    3.80   10.30
  -1   8 -16   71.09   13.20
   1  -8  16   60.29   10.10
  -1  -8 -16   88.99   18.50
   1   9 -16   34.20   11.10
   1  -9 -16   24.50   13.00
  -1  -9  16   27.00    7.20
   1  -9 -16   39.00   14.50
  -1  -9  16   55.69   11.60
   1   9 -15  199.68   24.70
  -1  -9  15  189.18   17.70
   1  -9 -15  218.68   27.20
  -1  -9  15  188.58   15.00
   1  -9 -15  197.88   26.50
   1   9 -14    1.20    7.70
   1  -9 -14    1.90   10.70
  -1  -9  14    1.40    5.20
   1  -9 -14    1.10    9.60
   1   9 -13    2.10    7.40
   1  -9 -13   -1.20   10.90
  -1  -9  13    0.60    4.90
   1  -9 -13   -1.40    8.80
  -1   9  12  -11.60    8.50
   1   9 -12   10.90    7.70
   1  -9 -12  -17.50    8.30
   1  -9 -12   -7.40    8.40
  -1  -9  12    2.80    4.70
  -1   9  11  141.29   18.20
   1   9 -11  191.18   17.50
   1  -9 -11  162.98   23.90
   1  -9 -11  200.28   21.00
  -1  -9  11  185.38   13.60
   1   9 -10   29.70    8.00
  -1   9  10   18.60    9.50
  -1  -9  10   24.90    6.00
   1  -9 -10   20.20   10.90
   1  -9 -10   14.70    9.10
   1   9  -9  274.17   19.80
  -1   9   9  247.48   21.10
   1  -9  -9  224.28   24.30
  -1  -9   9  283.17   16.80
   1  -9  -9  244.58   22.60
  -1  -9   9  253.67   21.20
   1   9  -8   42.50    8.60
  -1  -9   8   38.90    6.90
   1  -9  -8   22.40    9.60
  -1  -9   8   26.70    9.10
   1  -9  -8   42.10   10.00
  -1   9   7    1.90    5.50
   1   9  -7   -0.90    5.60
  -1  -9   7    0.70   10.10
   1  -9  -7   -5.80    6.90
  -1   9   6   31.80    9.60
   1   9  -6   29.00    7.50
  -1  -9   6   30.40    6.00
  -1  -9   6   23.50    7.70
   1  -9  -6   10.30    8.70
   1  -9  -6   35.30    7.70
   1   9  -5   68.29   11.30
  -1   9   5   53.79   10.50
   1  -9  -5   79.59   11.90
  -1  -9   5   76.09   11.40
  -1  -9   5   92.69   10.80
   1   9  -4   21.50    5.30
  -1   9   4   17.40    8.70
   1   9  -4   27.50    7.10
  -1   9   4   18.70    8.50
   1   9  -4   34.80   12.30
  -1  -9   4   40.20    6.80
  -1  -9   4   25.60    7.10
   1  -9  -4   19.20    8.90
   1  -9  -4   24.60    6.80
  -1   9   3   45.20    7.90
   1   9  -3   89.79   15.10
  -1   9   3   53.69   10.00
   1   9  -3   70.89    8.80
   1   9  -3   82.09   11.40
   1  -9  -3   34.60    8.80
  -1  -9   3   51.19    8.50
   1  -9  -3   63.79   12.20
  -1  -9   3   77.99   10.70
   1   9  -2  233.38   16.60
  -1   9   2  245.88   16.40
  -1   9   2  237.58   18.40
   1   9  -2  255.97   15.50
   1  -9  -2  269.17   16.00
  -1  -9   2  247.78   17.50
   1  -9  -2  231.88   15.90
  -1  -9   2  255.67   17.10
   1  -9  -2  235.68   19.70
   1   9  -1   -1.20    4.00
  -1   9   1    3.70    5.60
  -1   9   1   -7.70    4.30
   1   9  -1    6.80    5.10
   1  -9  -1   -5.30    6.80
  -1  -9   1   -0.70    5.00
  -1  -9   1    1.40    6.10
   1  -9  -1    2.00    4.90
   1   9   0  321.77   19.00
  -1   9   0  340.57   20.20
   1   9   0  349.17   20.20
  -1  -9   0  315.97   20.40
   1  -9   0  332.27   19.20
   1  -9   0  319.17   20.60
  -1  -9   0  316.17   19.30
  -1   9  -1    4.60    7.10
   1   9   1    3.00    5.20
   1   9   1   10.70    5.60
  -1   9  -1    7.70    4.70
  -1   9  -1    2.70    4.70
  -1  -9  -1    3.90    5.20
  -1  -9  -1    5.20    4.60
  -1  -9  -1   -7.00    5.40
   1  -9   1    8.60    5.60
   1  -9   1    7.30    5.40
   1   9   2   11.80    6.40
  -1   9  -2   19.50    7.50
  -1   9  -2    4.40    4.40
   1   9   2    3.50    4.90
  -1   9  -2    8.60    5.80
   1  -9   2    2.60    4.90
  -1  -9  -2   12.00    5.40
  -1  -9  -2   -1.60    7.10
   1  -9   2    3.00    4.70
   1   9   3    8.40    5.40
  -1   9  -3    5.80    4.80
   1   9   3   19.30    6.90
  -1   9  -3   21.70    6.40
   1  -9   3   22.20    5.90
   1  -9   3   16.40    5.80
  -1  -9  -3   21.80    5.90
  -1   9  -4   -4.90    4.70
   1   9   4   -6.60    6.50
   1  -9   4   -6.10    4.70
   1  -9   4   -2.70    4.80
  -1  -9  -4  -10.20    5.90
  -1   9  -5   -9.40    5.40
   1   9   5  -14.20    6.30
   1  -9   5   -1.40    4.40
  -1  -9  -5   -8.20    5.90
  -1  -9  -5   -9.20    5.30
  -1   9  -6  321.87   19.90
   1   9   6  361.96   23.90
   1   9   6  322.37   23.70
  -1  -9  -6  331.47   25.20
  -1  -9  -6  318.27   25.30
   1  -9   6  314.57   21.50
   1  -9   6  356.96   20.00
  -1   9  -7  143.49   14.70
   1   9   7  136.89   17.60
  -1  -9  -7   86.29   13.90
   1  -9   7  112.69   15.40
  -1  -9  -7  119.79   16.70
   1  -9   7  133.19   13.00
   1   9   8   -1.50    8.00
  -1   9  -8   19.00    6.90
  -1  -9  -8    0.70    7.50
   1  -9   8   11.70    5.70
  -1  -9  -8    2.30    7.90
   1   9   9  393.66   27.40
  -1   9  -9  409.66   23.30
   1  -9   9  397.96   21.30
  -1  -9  -9  396.36   27.60
  -1  -9  -9  376.56   30.70
   1   9  10    3.40    9.10
  -1   9 -10   19.40    7.70
  -1  -9 -10   -7.50    8.90
  -1  -9 -10   12.40   10.20
   1  -9  10   10.60    5.70
  -1   9 -11    1.90    6.50
   1   9  11   -2.20    8.80
  -1  -9 -11    2.20    9.00
   1  -9  11    7.20    5.60
  -1  -9 -11   -5.90    8.90
  -1   9 -12   -9.20    6.80
   1   9  12   -6.90   11.80
   1  -9  12    0.30    5.00
  -1  -9 -12  -13.60    8.10
  -1  -9 -12   -5.80    8.40
  -1   9 -13  119.39   16.20
  -1  -9 -13  105.29   17.90
  -1  -9 -13  109.99   18.70
   1  -9  13  139.99   13.60
   1   9  14   11.80   15.80
  -1   9 -14   40.50   10.20
  -1  -9 -14   26.90   12.70
   1  -9  14   27.90    8.10
  -1  -9 -14   63.09   17.70
  -1   9 -15  177.98   20.80
  -1  -9 -15  199.78   26.70
  -1  -9 -15  223.38   27.90
   1  10 -15   10.20    9.60
   1 -10 -15    5.80   12.30
   1 -10 -15    2.60   12.10
  -1  10  14  256.37   31.50
   1 -10 -14  296.67   31.10
  -1 -10  14  296.37   18.50
   1 -10 -14  347.47   32.00
   1  10 -13   -1.70    8.80
  -1  10  13   -7.30   10.60
   1 -10 -13    8.50   12.00
   1 -10 -13    1.00   10.00
  -1 -10  13    5.80    6.20
   1  10 -12   51.19   10.90
  -1  10  12   55.69   11.90
   1 -10 -12   53.59   14.10
  -1 -10  12   87.99   11.60
   1 -10 -12   68.29   20.10
  -1  10  11   49.30   10.90
   1  10 -11   49.30   10.00
   1 -10 -11   42.10   12.90
  -1 -10  11   44.50    7.50
   1 -10 -11   49.10   13.30
  -1  10  10   43.10   11.70
   1  10 -10   49.90   10.00
  -1 -10  10   67.09   10.90
   1 -10 -10   43.40   12.50
   1 -10 -10   46.90   12.40
   1  10  -9   16.10    7.20
   1 -10  -9   17.60   10.40
   1 -10  -9    7.50    9.60
  -1 -10   9   12.60    6.30
  -1  10   8  464.55   29.20
   1  10  -8  447.16   25.30
   1 -10  -8  398.36   30.50
  -1 -10   8  417.16   28.20
  -1 -10   8  462.15   24.10
   1 -10  -8  448.36   28.70
  -1  10   7   76.69   16.50
  -1 -10   7   81.39   12.70
  -1 -10   7   54.19   11.00
   1 -10  -7   54.19   12.10
   1 -10  -7   53.49   11.20
   1  10  -6  275.77   19.50
  -1  10   6  244.18   22.20
  -1 -10   6  317.27   28.60
   1 -10  -6  283.87   21.00
  -1 -10   6  254.57   18.80
   1 -10  -6  226.78   22.70
   1  10  -5  135.59   15.30
  -1  10   5  116.79   18.20
   1 -10  -5  119.39   18.20
  -1 -10   5  157.88   15.80
   1 -10  -5  134.49   15.90
  -1 -10   5  138.39   15.00
   1  10  -4   21.00    7.10
   1  10  -4   10.50    5.50
  -1  10   4    4.90    8.80
   1 -10  -4   12.90    8.60
   1 -10  -4    6.20   13.20
  -1 -10   4   17.80    7.20
   1  10  -3  169.58   14.00
   1  10  -3  187.08   16.30
  -1  10   3  141.49   18.10
   1 -10  -3  190.28   20.00
   1 -10  -3  206.78   16.80
  -1 -10   3  215.28   17.50
  -1  10   2  168.38   17.50
   1  10  -2  150.88   21.90
   1  10  -2  159.88   15.80
  -1 -10   2  179.08   17.20
   1 -10  -2  197.58   15.60
   1 -10  -2  164.18   18.40
  -1  10   1   31.60    8.40
   1  10  -1   23.10    6.40
  -1  10   1   12.90    6.60
   1  10  -1   32.10    7.80
   1 -10  -1   23.60    7.90
  -1 -10   1   23.80    9.40
   1 -10  -1   30.10    6.60
  -1  10  -1  152.58   14.90
  -1  10  -1  214.08   21.70
  -1  10  -1  189.08   16.40
   1  10   1  148.69   15.60
   1  10   1  202.68   18.50
   1 -10   1  205.18   18.20
  -1 -10  -1  182.48   15.70
  -1 -10  -1  171.28   18.50
  -1  10  -2  143.49   14.80
  -1  10  -2   95.09   12.40
   1  10   2  115.59   16.30
  -1 -10  -2  119.69   16.90
  -1 -10  -2   72.39   10.90
   1 -10   2  141.89   22.50
  -1  10  -3   31.10    7.90
  -1  10  -3   52.39    8.90
   1  10   3   42.10   10.80
  -1 -10  -3   37.00   10.40
   1 -10   3   43.20    9.50
  -1 -10  -3   27.10    9.20
   1  10   4    7.60    8.30
  -1 -10  -4   17.00    8.40
   1 -10   4   10.80    7.20
  -1 -10  -4   -1.20    6.90
  -1  10  -5  148.19   15.10
   1  10   5   98.09   15.00
  -1 -10  -5  133.99   18.60
   1 -10   5  134.69   16.70
   1 -10   5  132.29   15.40
   1  10   6  254.27   22.50
  -1  10  -6  300.37   20.00
   1 -10   6  303.57   20.10
  -1 -10  -6  322.17   22.10
   1 -10   6  263.87   21.90
  -1 -10  -6  226.68   23.90
   1  10   7    4.10    9.40
  -1  10  -7   17.90    7.30
   1 -10   7    4.40    6.60
  -1 -10  -7    8.10    9.40
  -1 -10  -7   -4.20    8.50
   1  10   8  192.58   23.30
  -1  10  -8  227.88   18.10
   1 -10   8  222.18   17.50
  -1 -10  -8  211.98   20.50
  -1 -10  -8  188.28   22.80
  -1  10  -9   45.30    9.60
   1  10   9   38.20   17.80
  -1 -10  -9   26.00   10.80
   1 -10   9   41.00    7.90
  -1 -10  -9   28.30    9.70
  -1  10 -10   -6.60    6.50
   1  10  10  -10.90    8.60
  -1 -10 -10  -10.60    7.70
   1 -10  10   -6.70    5.00
  -1 -10 -10  -15.70    7.50
   1  10  11   17.30   10.20
  -1  10 -11    9.40    8.00
   1 -10  11    6.90    6.00
  -1 -10 -11   19.00   10.20
  -1 -10 -11   18.70   12.80
   1  10  12  165.78   21.60
  -1  10 -12  176.68   18.30
  -1 -10 -12  139.99   21.90
  -1 -10 -12  166.78   22.50
   1 -10  12  161.38   14.80
  -1  10 -13   17.40    9.40
   1  10  13   14.20   13.30
   1 -10  13   16.30    8.30
  -1 -10 -13   35.70   12.90
  -1 -10 -13   30.40   12.20
  -1  10 -14   79.69   13.60
   1  10  14   55.79   17.90
  -1 -10 -14   62.89   16.00
  -1 -10 -14   89.19   17.10
   1  11 -14   32.60   11.00
   1 -11 -14   33.00   14.20
   1 -11 -14   23.70   14.00
   1  11 -13    9.20    9.30
  -1  11  13  -11.60   14.20
   1 -11 -13    1.00   12.60
   1 -11 -13    6.80   11.10
  -1  11  12   14.30   10.30
   1  11 -12   18.60    9.50
   1 -11 -12   12.30   12.20
  -1 -11  12   14.70    7.50
   1 -11 -12   24.20   11.80
   1  11 -11   -5.00    7.50
  -1  11  11   -1.30    7.90
   1 -11 -11  -19.60    8.80
  -1 -11  11   -3.80    6.00
   1 -11 -11    9.80    9.80
   1  11 -10   -9.00    7.10
  -1  11  10  -10.70    8.20
   1 -11 -10   -1.00    8.60
  -1 -11  10    4.90    6.10
   1 -11 -10    9.20   12.30
   1  11  -9    8.70    7.20
  -1  11   9    7.10    8.90
   1 -11  -9    0.30    8.60
  -1 -11   9   15.60    6.40
   1 -11  -9   -6.20    8.20
   1  11  -8  351.16   23.00
  -1  11   8  372.36   27.30
   1 -11  -8  352.16   31.20
  -1 -11   8  344.87   22.30
   1 -11  -8  321.47   25.30
  -1  11   7   31.30   10.70
   1 -11  -7   25.40   10.20
  -1 -11   7   22.40   10.20
   1 -11  -7   25.90   10.10
  -1 -11   7   30.60    7.90
   1  11  -6  552.74   28.90
  -1  11   6  517.45   32.90
   1 -11  -6  604.14   35.90
  -1 -11   6  575.54   29.90
  -1 -11   6  473.85   31.00
   1 -11  -6  575.84   31.20
  -1  11   5   27.60   10.30
   1  11  -5   28.20    8.90
   1 -11  -5   16.10   10.50
  -1 -11   5    9.80    7.90
   1 -11  -5   20.60    8.70
  -1 -11   5    8.10    9.70
   1  11  -4   55.79   10.60
   1  11  -4   33.90    7.40
  -1  11   4   34.60   11.10
   1 -11  -4   61.29   10.80
  -1 -11   4   51.69   12.60
   1 -11  -4   51.99   12.10
   1  11  -3   28.90    8.30
   1  11  -3    5.60    6.40
  -1  11   3   15.50    9.00
  -1 -11   3    4.00    9.00
   1 -11  -3   23.20    9.30
   1 -11  -3   19.10    9.60
   1  11  -2  666.23   31.90
   1  11  -2  655.33   33.20
  -1  11   2  649.74   35.20
   1 -11  -2  735.03   38.00
  -1 -11   2  696.33   35.40
   1 -11  -2  750.92   33.50
   1  11  -1  162.38   15.70
  -1  11   1  185.18   18.90
   1  11  -1  229.48   19.00
   1 -11  -1  165.38   20.70
  -1 -11   1  152.28   19.70
   1 -11  -1  203.38   21.30
   1  11   0 1470.55   60.89
  -1  11   0 1540.95   61.59
  -1 -11   0 1517.05   63.39
   1 -11   0 1632.84   63.49
  -1 -11   0 1688.53   57.99
  -1  11  -1  107.29   16.10
   1  11   1  144.29   17.30
  -1 -11  -1  118.39   18.50
   1 -11   1  124.39   17.90
   1  11   2  243.08   22.00
  -1  11  -2  249.18   19.80
  -1  11  -2  222.38   18.00
  -1 -11  -2  272.37   23.90
   1 -11   2  248.68   20.90
  -1 -11  -2  211.28   19.20
  -1  11  -3   -1.40    6.80
   1  11   3    0.90    7.40
  -1 -11  -3  -15.60    7.40
  -1 -11  -3   -5.40    8.00
   1  11   4  157.18   18.60
  -1  11  -4  144.89   16.70
   1 -11   4  149.09   18.40
  -1 -11  -4  161.38   17.20
  -1 -11  -4  172.98   21.20
  -1  11  -5   97.19   14.20
   1  11   5   56.49   12.20
   1 -11   5   50.99    9.90
  -1 -11  -5   60.99   12.50
   1 -11   5   58.89   13.10
   1  11   6  381.06   28.40
  -1  11  -6  397.46   24.10
   1 -11   6  393.66   26.20
  -1 -11  -6  445.76   26.70
  -1 -11  -6  379.76   29.80
   1  11   7   14.50    9.90
  -1  11  -7   25.90    7.90
   1  11   7   23.60    9.90
  -1 -11  -7   13.30    9.40
  -1 -11  -7   19.10    9.30
   1  11   8  138.49   19.30
  -1  11  -8  142.89   15.90
  -1 -11  -8  120.59   17.70
   1  11   9    8.50    9.30
  -1  11  -9    5.80    6.90
  -1 -11  -9    4.50    8.60
  -1 -11  -9   -4.70    8.20
   1  11  10   -7.60    9.20
  -1  11 -10  -10.50    7.20
  -1 -11 -10  -12.50    8.00
  -1  11 -11    0.20    7.90
   1  11  11    3.30    9.40
  -1 -11 -11   -3.60   10.10
  -1 -11 -11   10.50    9.40
  -1  11 -12   39.00   10.40
   1  11  12   36.80   12.20
  -1 -11 -12   82.89   16.70
  -1 -11 -12   36.70   14.50
  -1  11 -13    9.60   15.20
   1  11  13   -7.70   12.00
  -1 -11 -13   -0.70   11.30
  -1 -11 -13   13.60   13.10
   1 -11  13   -1.10    9.40
  -1  12  12   30.90   12.30
   1  12 -12    9.90   10.10
  -1 -12  12   17.30    7.70
   1 -12 -12   17.20   11.10
   1  12 -11  -15.70    8.20
  -1  12  11   -2.50    9.30
   1 -12 -11    3.90    9.80
   1 -12 -11   -2.90    9.90
  -1 -12  11    0.30    7.40
  -1  12  10   27.60   10.70
   1  12 -10    1.80    9.00
   1 -12 -10    9.40   10.90
   1 -12 -10    8.80    9.80
  -1 -12  10   -4.80    7.10
  -1  12   9   60.09   12.30
   1  12  -9   49.60   10.90
  -1 -12   9   41.60    8.80
   1 -12  -9   65.69   13.30
   1 -12  -9   35.10   14.00
  -1  12   8  108.19   19.90
  -1 -12   8   79.69   14.80
   1 -12  -8   50.09   14.00
   1 -12  -8   76.19   13.50
  -1  12   7   20.60    9.60
   1  12  -7   28.20    9.00
  -1 -12   7   25.00   13.50
   1 -12  -7   22.20   10.30
   1  12  -6  179.38   18.40
  -1  12   6  155.38   20.20
   1 -12  -6  176.38   23.60
   1 -12  -6  199.48   19.10
  -1 -12   6  172.88   18.70
  -1 -12   6  163.98   20.90
   1  12  -5   47.30   10.10
  -1  12   5   41.50   12.10
  -1 -12   5   26.70   10.80
  -1 -12   5   35.80   10.20
   1 -12  -5   43.00    9.80
   1 -12  -5   20.70   11.70
  -1  12   4   19.50    9.50
   1  12  -4   15.50    7.20
   1  12  -4   37.40    9.50
   1 -12  -4   12.50   10.90
   1 -12  -4   36.50    9.50
  -1 -12   4   13.00    9.10
  -1  12   3   34.40   10.00
   1  12  -3   40.80   10.20
   1 -12  -3   40.40    9.70
   1 -12  -3   27.70   11.20
  -1 -12   3   22.40   10.80
  -1  12   2    5.40    8.50
   1  12  -2   17.10    8.30
   1 -12  -2    4.90    9.50
  -1 -12   2   -8.70    8.50
   1 -12  -2    2.70    7.50
  -1  12   1    5.60    8.40
   1  12  -1    9.80    7.60
  -1 -12   1   -2.30    8.90
   1 -12  -1   15.50    7.80
  -1 -12   1    7.00    8.90
   1 -12  -1    3.80    9.50
  -1 -12   0   72.69   14.40
  -1 -12   0   64.19   12.60
   1 -12   0   45.50   12.70
  -1  12  -1   -0.20    7.60
   1  12   1    1.30    8.10
   1 -12   1   -6.80    8.50
  -1 -12  -1   -5.40   11.10
   1  12   2    2.80    8.80
  -1  12  -2    8.80    7.70
  -1 -12  -2    0.60    8.90
  -1 -12  -2    2.80    8.40
   1 -12   2    7.20    8.40
  -1  12  -3   44.10    9.90
   1  12   3   30.70    9.30
  -1 -12  -3   40.60   10.50
  -1 -12  -3   14.00   10.40
   1 -12   3   33.00    9.70
   1  12   4   23.30   10.20
  -1  12  -4   46.50   10.20
  -1 -12  -4   56.39   13.00
   1 -12   4   47.00   10.40
  -1  12  -5   15.00    7.70
   1  12   5  -10.80    8.60
  -1 -12  -5  -12.70    8.60
   1 -12   5    3.50    7.60
  -1 -12  -5   12.50    8.40
  -1  12  -6   99.09   15.00
   1  12   6   55.89   11.60
  -1 -12  -6   62.19   12.40
  -1 -12  -6   41.20   12.20
   1  12   7   84.49   15.90
  -1  12  -7  112.09   16.10
   1  12   7  126.19   20.30
   1 -12   7  156.08   16.40
  -1 -12  -7   98.09   16.80
  -1 -12  -7  129.49   18.90
  -1  12  -8   32.80    9.10
   1  12   8   31.90   11.70
   1 -12   8   27.50    8.90
  -1 -12  -8   31.40   10.80
   1  12   9  112.79   20.20
  -1  12  -9  107.19   16.80
  -1 -12  -9   86.59   15.40
   1 -12   9  109.89   15.80
  -1 -12  -9   75.09   16.30
   1  12  10    0.80   10.00
  -1  12 -10   -2.80    8.20
  -1 -12 -10    3.60   11.50
  -1 -12 -10   25.40   11.90
   1  12  11  -10.30    9.60
  -1  12 -11  -16.30   13.00
  -1 -12 -11  -13.60    9.70
  -1 -12 -11    1.60   11.00
   1  12  12   42.10   13.80
  -1  12 -12   29.30   11.20
   1 -12  12   36.30   10.10
  -1 -12 -12   20.00   12.30
   1  13 -11   -6.10    8.70
  -1  13  11    0.80   10.40
   1 -13 -11    7.50   11.70
   1 -13 -11   21.50   14.10
   1  13 -10   -2.00    8.30
  -1  13  10   10.80   11.30
   1 -13 -10   -3.70   11.40
  -1 -13  10   14.20   10.60
   1 -13 -10   17.20   11.60
  -1  13   9   32.40   11.80
   1  13  -9   30.20   11.00
  -1 -13   9   21.00    9.90
   1 -13  -9   39.50   13.70
   1 -13  -9    8.40   10.70
   1  13  -8   14.00   14.20
  -1  13   8    8.80   10.60
   1 -13  -8   26.90   11.90
  -1 -13   8   21.60   10.00
   1 -13  -8   15.70   13.40
   1  13  -7   -2.10    8.60
  -1  13   7    3.40    9.90
   1 -13  -7   23.40   10.10
  -1 -13   7  -10.60    7.80
   1 -13  -7    0.60   11.50
  -1  13   6   -7.10    8.20
   1 -13  -6   -6.80    8.00
   1 -13  -6  -15.60    9.60
   1  13  -5   -2.50    7.20
  -1  13   5    8.20   15.60
   1 -13  -5    0.20    8.10
   1 -13  -5  -11.30    8.70
  -1 -13   5   -2.90    8.50
   1  13  -4   18.60    8.60
  -1  13   4   22.60    9.90
  -1 -13   4   10.70    9.00
   1 -13  -4   25.50    9.90
   1 -13  -4   14.50   11.00
   1  13  -3    7.40    8.00
  -1  13   3   -3.60    7.80
   1 -13  -3    1.10    9.40
   1 -13  -3   -6.10    7.90
  -1 -13   3    0.60    8.60
  -1  13   2   38.50   10.90
   1  13  -2   32.60    9.60
   1 -13  -2   38.10   10.30
  -1 -13   2   12.00    9.00
   1 -13  -2   10.90   11.10
   1  13  -1   13.00    8.90
  -1  13   1   12.00    9.20
   1 -13  -1   10.40   10.30
  -1 -13   1    1.50    7.80
   1 -13  -1    8.20    8.50
  -1 -13   1   -1.60   10.30
   1  13   0   19.70    8.90
  -1  13   0    8.10    7.90
  -1 -13   0   -1.90    7.90
  -1 -13   0    8.90    9.00
   1 -13   0   15.90   10.20
   1 -13   0    8.50    8.70
  -1  13  -1   -1.50    8.50
   1  13   1   -4.40    7.60
   1 -13   1   -6.00    7.70
  -1 -13  -1   -6.10    8.90
  -1 -13  -1   -6.30    8.10
  -1  13  -2  129.09   17.60
   1  13   2  147.19   19.60
  -1 -13  -2   87.79   15.60
   1 -13   2  138.99   19.90
  -1 -13  -2  134.19   16.80
   1  13   3   14.00    8.60
  -1  13  -3    2.70    7.30
  -1 -13  -3   -4.50    7.90
  -1 -13  -3    4.20    9.50
   1 -13   3   -1.50    9.00
  -1  13  -4    4.00    8.40
   1  13   4   -9.70   11.30
  -1 -13  -4  -17.00    9.30
  -1 -13  -4    0.40    7.50
   1 -13   4   -1.70    8.60
  -1  13  -5   11.40    9.10
   1  13   5    1.40    9.50
  -1 -13  -5   22.00    9.70
   1 -13   5   15.70    9.90
  -1 -13  -5   -1.70   10.60
   1  13   6   -5.30    7.80
  -1  13  -6   -3.30    8.70
  -1 -13  -6   -6.90    8.50
   1 -13   6   -9.10    8.00
   1  13   7   31.20   12.20
   1  13   7   52.99   13.60
  -1  13  -7   48.10   11.20
   1 -13   7   34.10   10.80
  -1 -13  -7   58.39   12.90
  -1 -13  -7   43.90   14.20
   1  13   8   35.30   13.40
  -1  13  -8   16.00   11.60
  -1 -13  -8   31.20   12.40
   1 -13   8   24.10    9.30
  -1 -13  -8   46.60   12.70
   1  13   9   34.10   11.80
  -1  13  -9   21.50   11.30
  -1 -13  -9   24.00   14.10
   1 -13   9   24.40    9.30
  -1 -13  -9   45.40   13.00
   1  13  10   30.80   12.50
  -1  13 -10   22.30   10.10
  -1 -13 -10   37.60   13.80
   1 -13  10   60.89   11.70
  -1 -13 -10   23.60   12.80
  -1  14   8   26.60   13.30
   1  14  -8   22.20   10.70
   1 -14  -8   15.70   13.30
   1 -14  -8    8.70   11.80
  -1 -14   8   14.30   11.50
   1  14  -7   20.40   10.20
  -1  14   7   15.00   10.60
   1 -14  -7   26.30   11.50
  -1 -14   7   -0.60   10.10
   1 -14  -7    6.90   12.20
  -1  14   6   -7.80   10.20
   1  14  -6    9.80    9.30
   1 -14  -6  -21.90   10.50
   1 -14  -6   13.60   11.10
  -1 -14   6   13.50   10.40
  -1  14   5   -9.40    8.60
   1  14  -5   -6.50    8.40
   1 -14  -5   -1.90    8.70
  -1 -14   5   -1.80   10.50
  -1  14   4   -3.90    9.80
   1  14  -4   -0.10    8.50
  -1 -14   4   -3.90   10.10
   1 -14  -4  -12.40   18.50
   1 -14  -4  -16.70    8.10
   1  14  -3    5.60    9.40
  -1  14   3   -3.20    9.50
  -1 -14   3   -8.20    9.10
   1 -14  -3  -12.60   10.50
   1 -14  -3  -12.70    8.60
   1  14  -2   32.40   10.90
  -1  14   2   25.30    9.80
  -1 -14   2   15.20   11.70
   1 -14  -2   31.70   13.20
  -1 -14   2   34.80   10.60
   1 -14  -2   24.90   10.30
  -1  14   1   15.30   10.70
   1  14  -1   12.90    8.80
   1 -14  -1   10.90    9.80
   1 -14  -1    7.30   11.10
  -1 -14   1   18.10   10.00
  -1 -14   1   10.00   11.60
   1  14   0   23.30   11.00
  -1  14   0   12.80   11.30
   1 -14   0   13.70    9.20
   1 -14   0   -0.60    9.80
  -1 -14   0    4.70    8.80
  -1 -14   0   -0.30   10.10
  -1  14  -1   -7.90   13.60
   1  14   1   -8.60    9.10
  -1 -14  -1   -3.90    9.00
  -1 -14  -1   -2.50   10.10
   1 -14   1   -8.20    7.80
   1 -14   1  -13.40    9.60
   1  14   2    1.20    9.30
  -1  14  -2   18.00   15.00
   1 -14   2   14.40   11.20
  -1 -14  -2   11.90    9.50
  -1 -14  -2    5.90   10.50
   1  14   3    8.10    9.30
  -1  14  -3    6.60   12.60
  -1 -14  -3   24.30   10.50
   1 -14   3    6.60   10.70
  -1 -14  -3   -2.10   10.40
   1  14   4   -5.20    9.20
  -1  14  -4   -4.00    9.80
  -1 -14  -4    4.30    9.20
   1 -14   4   -8.40    9.40
   1  14   5    6.60   10.20
  -1  14  -5   15.70    9.80
  -1 -14  -5   17.30   11.00
  -1 -14  -5    5.80   11.50
   1 -14   5    0.90   10.30
   1  14   6   18.70   11.00
  -1  14  -6   24.30   10.60
  -1 -14  -6   17.30   12.00
   1 -14   6   12.50   11.10
  -1 -14  -6   23.60   12.70
   1  14   7  -15.20    9.30
   1  14   7    4.50   11.00
  -1  14  -7    5.40   10.00
   1 -14   7    0.90   10.00
  -1 -14  -7   -6.80   11.50
  -1 -14  -7  -12.10    9.80
  -1  14  -8  -17.70    8.70
   1  14   8   -3.90   10.90
  -1 -14  -8  -11.20   11.70
   1 -14   8  -13.10    9.10
  -1 -14  -8    0.50   11.50
   1  15  -5   43.80   12.00
  -1  15   5   65.09   15.60
   1 -15  -5   62.99   14.30
  -1 -15   5   39.20   13.60
   1 -15  -5   69.39   19.30
   1  15  -4    9.20   10.50
  -1  15   4    3.90   11.70
   1 -15  -4   -2.80   10.50
   1 -15  -4   -3.10   11.20
  -1 -15   4    5.30   11.30
  -1  15   3   27.80   12.50
   1  15  -3   38.90   11.60
   1 -15  -3   33.60   12.40
  -1 -15   3   39.70   15.10
  -1 -15   3   23.40   10.80
   1  15  -2   79.29   14.40
  -1  15   2   86.69   15.90
   1 -15  -2   60.39   16.40
  -1 -15   2   58.19   16.80
   1 -15  -2   55.89   14.80
  -1 -15   2   74.59   14.10
  -1  15   1   31.50   12.40
   1  15  -1   38.30   11.50
  -1 -15   1   29.10   12.10
  -1 -15   1   33.20   13.70
   1 -15  -1    7.50   12.70
  -1  15   0   42.00   14.40
   1  15   0   52.59   14.00
  -1 -15   0   45.30   15.10
  -1 -15   0   52.39   12.60
   1 -15   0   60.19   17.60
   1 -15   0   32.30   13.50
  -1  15  -1   22.50   11.20
   1  15   1    7.60   10.70
  -1 -15  -1   -3.20   10.30
   1 -15   1  -11.90   10.70
  -1 -15  -1   22.60   15.80
   1 -15   1   11.10   12.10
   1  15   2   -7.60    9.40
  -1  15  -2    9.60   10.20
   1 -15   2  -15.00   10.50
  -1 -15  -2   -3.30   11.60
  -1  15  -3   58.79   13.70
   1  15   3   50.39   13.90
  -1 -15  -3   63.09   14.00
  -1 -15  -3   59.39   17.00
   1 -15   3   33.40   13.80
  -1  15  -4    8.10    9.90
   1  15   4   -8.40    9.70
  -1 -15  -4    0.00   12.30
   1 -15   4    8.70   12.00
  -1 -15  -4    7.10   11.50
  -2   0  20  200.18   28.80
   2   0 -20  187.78   23.50
  -2   0  19  -13.50   10.70
   2   0 -19  -11.20    7.70
   2   0 -18  -16.40    8.00
  -2   0  18   -3.50    9.90
   2   0 -17   -2.50    7.20
  -2   0  17  -13.70    9.20
  -2   0  16   17.20   12.80
  -2   0  15  -13.50    9.50
  -2   0  15   -6.70    5.10
   2   0 -15   -1.60    7.40
   2   0 -15  -13.50    8.20
  -2   0  13   -2.20    4.30
   2   0 -13    0.10    6.00
  -2   0  13   -5.20    7.40
  -2   0  12   89.49   16.10
  -2   0  12   94.09   10.20
   2   0 -12   86.19   12.90
  -2   0  12   95.59   11.40
   2   0 -11  -12.20    6.10
  -2   0  11    0.10    4.00
  -2   0  11   -3.10    6.40
   2   0 -11   -8.60    6.00
  -2   0  11   -5.00    2.80
  -2   0  10  182.18   12.90
   2   0 -10  174.58   13.90
  -2   0  10  153.58   11.30
   2   0 -10  155.08   16.80
  -2   0  10  186.08   17.80
  -2   0   9   -4.70    5.60
  -2   0   9   -1.90    2.70
   2   0  -9   -1.90    4.00
  -2   0   9    7.60    3.50
  -2   0   8 2868.91   91.69
  -2   0   8 3133.39   96.89
   2   0  -8 2791.12   94.29
   2   0  -8 2708.13   92.09
  -2   0   8 2848.31   93.49
   2   0  -7   -3.00    3.70
   2   0  -7    0.50    2.50
  -2   0   7    3.20    4.20
   2   0  -7    1.00    2.30
  -2   0   7   -0.50    2.30
   2   0  -6 3640.94  118.29
  -2   0   6 3826.02  117.99
  -2   0   6 3973.00  121.39
   2   0  -6 3769.12  119.99
  -2   0   6 3803.52  119.49
   2   0  -5   -0.80    1.90
   2   0  -5   -3.60    3.50
   2   0  -5   -0.10    1.50
  -2   0   5    1.30    1.50
  -2   0   4  189.68    8.90
  -2   0   4  174.38   10.10
   2   0  -4  186.58   10.70
   2   0  -4  191.78    8.20
  -2   0   4  187.08    7.90
   2   0  -4  187.08    9.00
  -2   0   3    1.50    0.90
   2   0  -3    1.20    0.90
  -2   0   3   -0.30    1.10
   2   0   1   -0.10    0.70
  -2   0  -1    0.20    0.80
  -2   0  -1    0.10    0.70
   2   0   1    0.30    0.80
  -2   0  -1    1.10    1.00
   2   0   1   -0.30    0.90
   2   0   2 3949.20  119.59
  -2   0  -2 3796.22  121.29
   2   0   2 3832.12  120.09
  -2   0  -2 3813.12  119.59
   2   0   2 4011.50  122.29
  -2   0  -2 4027.80  120.69
  -2   0  -3    0.00    1.80
   2   0   3   -0.20    1.40
   2   0   3    1.20    1.90
  -2   0  -3    0.60    1.70
  -2   0  -3    6.10    3.10
   2   0   4 4127.79  128.09
  -2   0  -4 3877.51  127.29
  -2   0  -4 3860.11  125.49
  -2   0  -4 4456.45  133.09
   2   0   5    8.60    4.70
  -2   0  -5    0.10    2.40
  -2   0  -5    0.70    1.70
   2   0   5   -3.00    2.00
  -2   0  -5    2.00    3.10
  -2   0  -6 3800.32  123.59
  -2   0  -6 3945.81  126.79
  -2   0  -6 4184.38  129.39
   2   0   6 4017.50  126.69
   2   0   6 3972.70  126.19
  -2   0  -7    0.00    2.60
  -2   0  -7   -0.20    3.30
   2   0   7    5.10    3.10
  -2   0  -7    1.00    4.30
   2   0   7   -0.40    3.00
   2   0   7   -7.20    5.00
   2   0   8  217.58   14.00
   2   0   8  213.58   14.10
  -2   0  -8  219.78   12.30
  -2   0  -8  250.07   18.40
  -2   0  -8  256.97   15.80
   2   0   9    0.90    3.50
   2   0   9    2.40    6.60
  -2   0  -9   -1.00    2.70
  -2   0  -9   -4.10    4.70
  -2   0  -9   -0.20    3.70
   2   0   9   -0.30    3.70
  -2   0 -10   64.19   12.70
   2   0  10   64.89   10.20
   2   0  10   67.69    9.60
  -2   0 -10   73.79    8.10
  -2   0 -10   65.99   11.50
  -2   0 -11   -9.50    6.50
   2   0  11   -4.40    4.70
  -2   0 -11   -2.70    5.20
   2   0  11    5.30    9.30
  -2   0 -11   -2.80    3.20
  -2   0 -12  264.77   20.20
   2   0  12  259.87   17.80
  -2   0 -12  251.27   15.60
  -2   0 -12  252.77   23.30
   2   0  13    1.60   12.50
  -2   0 -13   -9.10    6.20
  -2   0 -13   -4.30    4.60
   2   0  13    2.90    5.30
  -2   0 -14   74.59   12.70
  -2   0 -14  103.09   12.30
   2   0  14   62.39   18.40
   2   0  15   -9.40   14.60
  -2   0 -15  -15.20    6.70
  -2   0 -15   -9.80    5.10
  -2   0 -16    5.10    9.20
   2   0  16    7.40   13.90
  -2   0 -16    8.20    5.70
  -2   0 -17  -14.30    7.10
   2   0  17  -18.60   11.40
  -2   0 -18    2.50   10.10
   2   0  18   -5.70   13.30
  -2   0 -19   12.00   11.40
   2   0  19    3.30   16.90
   2   1 -20  191.98   24.20
  -2   1  20  170.48   26.40
   2  -1 -20  164.38   23.50
  -2  -1  20  161.08   27.20
   2   1 -19   -1.10    9.50
  -2   1  19   -1.00   10.90
   2  -1 -19    8.60   10.20
  -2  -1  19   10.90   12.60
  -2   1  18   -3.90    9.60
   2   1 -18   -4.60   13.60
  -2  -1  18   -1.90    8.70
  -2   1  17   14.90   11.40
   2   1 -17    9.80    8.30
   2  -1 -17   -2.40    9.00
   2  -1 -17    9.50    5.40
  -2  -1  17   18.70   12.10
   2   1 -16  294.97   24.00
  -2   1  16  280.47   28.30
  -2  -1  16  253.17   29.60
   2  -1 -16  250.97   28.30
   2  -1 -16  262.87   16.50
  -2  -1  16  255.47   18.80
   2  -1 -16  278.87   24.70
   2   1 -15    4.60    7.70
  -2   1  15    6.00   11.70
  -2   1  15   20.70    7.80
   2  -1 -15    5.60    5.00
  -2  -1  15   -3.50    5.70
  -2  -1  15   -8.50    9.80
   2  -1 -15    6.10    7.30
   2  -1 -15    8.70    8.00
   2   1 -14  750.02   37.70
  -2   1  14  837.62   35.60
   2   1 -14  677.53   42.80
  -2   1  14  864.71   44.30
  -2  -1  14  811.92   34.30
   2  -1 -14  812.72   50.29
   2  -1 -14  801.32   39.80
   2  -1 -14  770.72   31.20
  -2  -1  14  763.72   44.20
  -2   1  13    4.50    5.90
   2   1 -13  -15.70    9.20
   2   1 -13   13.40    6.90
  -2   1  13    9.80    9.20
   2  -1 -13    2.50    6.30
   2  -1 -13   -2.30    6.50
  -2  -1  13   -2.80    7.60
  -2  -1  13   10.10    4.80
  -2   1  12  152.78   12.60
   2   1 -12  167.58   15.50
  -2   1  12  151.18   15.00
  -2   1  12  196.68   21.40
   2  -1 -12  165.18   15.60
  -2  -1  12  175.28   14.40
   2  -1 -12  148.49   15.60
  -2  -1  12  179.18   12.30
  -2  -1  12  141.39   18.40
   2   1 -11   37.80    8.80
  -2   1  11   47.00    9.80
  -2   1  11   33.10    6.20
  -2   1  11   29.50    5.80
   2   1 -11   17.80    8.20
   2  -1 -11   21.90    7.80
   2  -1 -11   58.49   11.70
  -2  -1  11   35.90    6.50
  -2  -1  11   39.00    8.80
   2   1 -10  130.19   12.40
  -2   1  10  134.09   11.10
  -2   1  10  131.19   16.10
  -2   1  10  115.59   10.10
   2  -1 -10  123.09   11.10
   2  -1 -10  131.09   12.70
  -2  -1  10  102.49   11.00
   2  -1 -10  144.59   12.60
  -2  -1  10  115.09   14.90
  -2  -1  10  109.89    9.60
   2   1  -9  172.28   13.10
  -2   1   9  186.78   12.50
  -2   1   9  183.48   11.50
  -2   1   9  214.18   17.60
  -2  -1   9  174.88   12.50
  -2  -1   9  160.68   16.10
  -2  -1   9  165.78   10.60
   2  -1  -9  183.68   12.70
   2  -1  -9  197.08   14.30
   2  -1  -9  184.68   13.50
  -2   1   8 1227.98   42.10
   2   1  -8 1161.58   43.50
  -2   1   8 1142.49   42.70
  -2  -1   8 1200.28   46.60
   2  -1  -8 1177.78   44.00
  -2  -1   8 1192.78   43.20
   2  -1  -8 1226.58   43.70
   2  -1  -8 1202.18   42.90
  -2  -1   8 1175.08   46.10
  -2   1   7   76.79    7.30
   2   1  -7   83.99    7.90
  -2   1   7   75.29    6.60
  -2   1   7   61.79    9.60
   2  -1  -7   91.59    9.10
  -2  -1   7   74.79    5.90
   2  -1  -7   70.69    7.20
  -2  -1   7   78.79    7.50
  -2  -1   7   62.39   10.00
   2  -1  -7   72.79    7.70
  -2   1   6  784.02   29.50
   2   1  -6  791.22   29.90
  -2   1   6  812.72   30.80
   2  -1  -6  831.72   29.90
  -2  -1   6  826.52   32.60
  -2  -1   6  808.12   29.70
  -2  -1   6  819.72   27.80
   2  -1  -6  812.62   30.30
   2  -1  -6  847.32   29.70
  -2   1   5 1861.81   57.89
   2   1  -5 1809.32   61.19
  -2   1   5 1745.93   58.19
   2   1  -5 1775.92   58.49
   2  -1  -5 1817.02   58.09
   2  -1  -5 1754.52   58.79
   2  -1  -5 1778.12   58.19
  -2  -1   5 1773.52   60.79
  -2  -1   5 1765.92   56.39
  -2  -1   5 1905.31   59.19
   2   1  -4    5.20    2.10
  -2   1   4    7.80    2.30
  -2   1   4    3.00    3.20
  -2   1   4    5.70    1.90
  -2  -1   4    6.50    1.40
   2  -1  -4    5.90    2.30
  -2  -1   4    7.00    2.40
   2  -1  -4    5.00    2.00
   2   1  -3  739.63   24.60
  -2   1   3  762.92   24.70
  -2   1   3  773.12   25.00
   2  -1  -3  626.24   27.20
  -2  -1   3  758.02   24.60
   2  -1  -3  754.02   25.10
   2   1  -2  478.85   16.90
   2   1  -2  487.95   15.80
  -2   1   2  496.55   16.70
  -2   1   2  497.55   16.70
   2   1  -2  464.75   16.00
  -2  -1   2  490.35   15.90
   2  -1  -2  495.15   16.80
  -2  -1   2  475.25   15.90
  -2  -1   2  480.85   16.90
   2  -1  -2  494.35   16.70
   2   1  -1    6.20    1.30
  -2   1   1    2.60    0.80
  -2  -1   1    4.70    1.10
   2  -1  -1    4.50    1.10
   2   1   0   36.10    2.50
   2   1   0   32.20    2.50
   2  -1   0   33.50    1.80
  -2  -1   0   32.80    4.10
   2   1   1  118.29    6.60
   2   1   1  116.19    6.10
   2   1   1  124.79    5.40
  -2   1  -1  129.39    4.80
   2   1   1  128.39    5.50
  -2  -1  -1  120.99    6.60
  -2  -1  -1  122.19    5.50
  -2  -1  -1  132.89    5.50
   2  -1   1  121.29    4.80
   2   1   2  144.69    7.70
   2   1   2  142.19    6.90
   2   1   2  148.09    8.40
  -2   1  -2  138.99    7.40
   2  -1   2  147.79    7.50
   2  -1   2  144.59    6.70
  -2  -1  -2  146.49    8.10
  -2  -1  -2  141.59    6.60
  -2  -1  -2  120.19    9.20
   2   1   3 1398.06   46.20
  -2   1  -3 1379.36   45.90
   2   1   3 1426.76   45.60
   2   1   3 1359.56   46.80
   2  -1   3 1374.76   44.20
  -2  -1  -3 1390.56   46.80
   2  -1   3 1430.46   46.00
  -2  -1  -3 1347.37   45.50
  -2   1  -4  409.76   17.00
   2   1   4  477.15   19.00
  -2   1  -4  408.36   17.80
   2   1   4  421.16   19.40
   2   1   4  492.75   18.70
  -2   1  -4  393.76   21.40
   2  -1   4  442.06   18.10
   2  -1   4  449.56   16.10
  -2  -1  -4  432.96   18.90
  -2  -1  -4  430.86   17.90
   2   1   5  445.66   19.20
   2   1   5  478.25   19.20
  -2   1  -5  460.15   19.60
  -2   1  -5  438.06   23.10
  -2   1  -5  432.26   17.10
   2   1   5  459.05   21.30
  -2  -1  -5  459.95   20.30
   2  -1   5  443.36   19.50
  -2  -1  -5  439.26   19.20
   2  -1   5  469.65   16.80
  -2   1  -6  845.82   36.60
   2   1   6  805.12   34.90
   2   1   6  873.81   32.30
   2   1   6  860.41   32.00
  -2   1  -6  832.62   28.90
  -2   1  -6  837.12   32.40
  -2  -1  -6  831.52   32.30
  -2  -1  -6  837.72   33.40
   2  -1   6  840.72   32.30
  -2  -1  -6  873.21   30.70
  -2   1  -7  616.44   23.20
   2   1   7  639.44   26.60
  -2   1  -7  607.54   27.00
   2   1   7  664.23   26.80
  -2   1  -7  680.53   32.40
   2  -1   7  639.14   27.10
  -2  -1  -7  616.54   24.70
  -2  -1  -7  659.73   27.60
  -2  -1  -7  653.53   28.30
  -2   1  -8  494.45   28.40
  -2   1  -8  471.05   19.10
   2   1   8  513.05   23.10
  -2   1  -8  510.25   23.90
   2   1   8  497.45   23.00
  -2  -1  -8  496.45   23.80
   2  -1   8  496.75   23.40
  -2  -1  -8  484.45   20.90
  -2  -1  -8  495.35   24.70
   2  -1   8  479.25   22.10
   2   1   9  564.24   25.80
  -2   1  -9  577.54   27.00
  -2   1  -9  595.34   32.00
   2   1   9  571.24   26.40
  -2   1  -9  545.95   21.70
   2  -1   9  539.45   25.10
  -2  -1  -9  570.14   23.70
  -2  -1  -9  582.94   27.50
  -2  -1  -9  604.74   28.50
   2   1  10   -7.10    6.30
   2   1  10    6.60    4.10
  -2   1 -10    2.50    2.90
  -2   1 -10    3.40    5.40
   2   1  10   -3.90    4.00
  -2   1 -10   -5.50    6.70
  -2  -1 -10   -0.40    4.60
   2  -1  10   -6.10    3.50
   2  -1  10   -4.40    4.00
   2  -1  10    4.60    7.70
  -2  -1 -10    4.50    3.70
  -2  -1 -10   -3.80    4.80
   2   1  11    7.20    4.40
  -2   1 -11    0.40    5.60
   2   1  11   -1.20    8.40
  -2   1 -11   -4.50    3.30
   2   1  11   -3.60    5.30
  -2  -1 -11   -5.00    4.70
   2  -1  11  -10.00    6.20
  -2  -1 -11    2.70    3.70
  -2  -1 -11   -4.20    6.00
   2  -1  11    0.90    4.50
  -2   1 -12  515.05   21.80
   2   1  12  532.05   26.80
  -2   1 -12  473.45   32.00
  -2   1 -12  499.35   28.50
   2  -1  12  517.55   36.40
  -2  -1 -12  518.85   23.80
   2  -1  12  521.85   27.60
  -2  -1 -12  534.35   29.20
  -2  -1 -12  499.05   30.10
  -2   1 -13  170.48   18.80
  -2  -1 -13  176.48   19.40
   2  -1  13  194.98   28.50
   2  -1  13  151.68   15.60
  -2  -1 -13  203.08   19.90
  -2  -1 -13  182.58   15.10
  -2   1 -14  185.88   19.50
   2   1  14  137.49   29.40
   2  -1  14  217.48   30.30
  -2  -1 -14  206.28   20.20
  -2  -1 -14  192.08   16.20
   2   1  15   35.00   18.50
  -2   1 -15   15.40    8.80
  -2  -1 -15   24.30    9.30
   2  -1  15   26.90   15.50
  -2  -1 -15   10.90    6.40
   2   1  16    0.10   15.30
  -2   1 -16   -4.30    8.40
  -2  -1 -16   -5.70    5.70
  -2  -1 -16   -5.90    7.70
   2  -1  16  -11.10   11.20
  -2   1 -17   -6.90    8.60
   2   1  17   -4.60   13.40
  -2  -1 -17   -6.30    9.00
  -2  -1 -17   -0.40    6.20
   2  -1  17  -10.20   10.60
  -2   1 -18   12.80   10.40
   2   1  18  -12.10   16.10
  -2  -1 -18    7.20   10.70
   2  -1  18    1.80   13.00
  -2  -1 -18    9.50    7.20
   2   1  19   -8.60   14.40
  -2   1 -19   14.70   11.30
   2  -1  19   23.00   16.50
  -2  -1 -19  -10.40    6.70
  -2  -1 -19   -3.30   11.00
   2   2 -20    3.00   10.70
  -2   2  20   13.70   12.70
   2  -2 -20   -3.80    6.80
   2  -2 -20    0.30   10.20
   2   2 -19   -1.60    9.30
  -2   2  19   -4.40   11.30
   2  -2 -19   -3.70    6.10
   2  -2 -19   -0.30   10.60
   2   2 -18    5.30   10.40
  -2   2  18   13.60   10.10
   2  -2 -18  -11.80    8.50
  -2  -2  18    6.20   11.30
   2  -2 -18   -1.60    5.80
   2   2 -17  209.78   22.60
  -2   2  17  247.28   25.70
  -2  -2  17  214.48   27.60
   2  -2 -17  237.98   17.70
   2  -2 -17  211.18   23.20
  -2  -2  17  210.18   18.80
  -2   2  16    5.20   12.00
   2   2 -16   21.20    9.40
   2  -2 -16    3.80    5.70
   2  -2 -16    0.80    8.30
  -2  -2  16    7.70    6.20
   2  -2 -16   18.60    7.70
  -2  -2  16    6.60   11.20
   2   2 -15  425.16   27.80
  -2   2  15  489.65   34.30
  -2  -2  15  431.56   35.50
   2  -2 -15  461.35   27.10
   2  -2 -15  424.86   29.60
  -2  -2  15  399.96   23.90
  -2   2  14   28.30   11.50
   2   2 -14   26.20    8.50
  -2   2  14   27.30    7.80
  -2  -2  14    3.70    9.90
  -2  -2  14    7.60    5.20
   2  -2 -14   13.60    8.30
   2  -2 -14   19.60    7.10
   2   2 -13   -4.10    5.20
  -2   2  13    2.10    9.90
  -2   2  13   -3.10    4.20
   2  -2 -13   -5.30    6.10
  -2  -2  13   -0.70    4.10
  -2  -2  13  -11.30    6.90
  -2   2  12   31.80    8.00
   2   2 -12   26.90    7.00
  -2   2  12   35.60   10.80
  -2  -2  12   27.80    5.30
   2  -2 -12   32.70    7.00
  -2  -2  12   44.90    7.20
   2  -2 -12   23.70    6.70
   2  -2 -12   29.60    8.20
  -2  -2  12   27.10   10.00
  -2   2  11  570.74   25.70
   2   2 -11  542.35   29.80
  -2   2  11  563.34   26.00
  -2  -2  11  583.14   24.00
   2  -2 -11  562.24   27.50
  -2  -2  11  556.44   26.60
  -2  -2  11  570.14   32.50
   2  -2 -11  553.04   26.10
   2  -2 -11  540.95   28.30
  -2   2  10   78.89    9.00
   2   2 -10   66.39   10.10
  -2   2  10   48.30   10.30
  -2  -2  10   70.99   13.00
  -2  -2  10   75.89    7.50
   2  -2 -10   79.19    9.40
   2  -2 -10   80.49   10.90
  -2  -2  10   62.19    9.10
   2  -2 -10   66.19   10.10
   2   2  -9  556.34   25.60
  -2   2   9  551.84   24.40
  -2   2   9  588.54   24.50
   2  -2  -9  569.54   24.30
  -2  -2   9  560.64   29.60
  -2  -2   9  562.34   25.40
  -2  -2   9  574.54   22.90
   2  -2  -9  574.64   26.60
   2  -2  -9  603.84   26.20
   2   2  -8   17.90    7.70
  -2   2   8   23.10    4.30
   2   2  -8   26.70    5.90
  -2   2   8   20.00    4.40
  -2  -2   8   18.10    3.40
  -2  -2   8   25.50    5.40
   2  -2  -8   28.70    5.80
   2  -2  -8   22.70    5.00
   2  -2  -8   17.10    4.80
   2   2  -7   20.10    6.70
  -2   2   7   25.80    4.40
   2   2  -7   24.40    5.00
  -2   2   7   27.40    4.40
   2  -2  -7   22.60    4.10
  -2  -2   7   31.90    5.10
   2  -2  -7   16.30    4.30
  -2  -2   7   29.00    3.80
   2  -2  -7   25.50    4.60
  -2  -2   7   16.20    5.90
   2   2  -6  339.07   19.40
  -2   2   6  352.26   15.40
   2   2  -6  351.96   15.70
  -2   2   6  347.57   15.40
   2  -2  -6  348.27   14.30
   2  -2  -6  356.56   16.20
  -2  -2   6  342.57   13.30
  -2  -2   6  358.66   15.70
   2  -2  -6  349.96   16.40
   2   2  -5  606.14   23.00
  -2   2   5  648.24   23.20
   2   2  -5  591.14   26.20
   2   2  -5  595.24   23.50
  -2   2   5  603.74   22.30
  -2   2   5  611.64   23.00
  -2  -2   5  669.33   23.90
   2  -2  -5  656.03   24.00
   2  -2  -5  607.04   23.70
   2  -2  -5  610.44   21.60
  -2   2   4   67.59    5.70
   2   2  -4   69.79    5.40
   2   2  -4   70.59    6.00
   2  -2  -4   65.99    5.80
   2  -2  -4   70.79    6.20
  -2  -2   4   73.99    5.50
   2   2  -3  218.48    9.10
   2   2  -3  216.08    9.90
  -2   2   3  215.98    9.70
  -2   2   3  205.48    9.60
   2  -2  -3  203.58    9.90
   2  -2  -3  211.38    9.80
  -2  -2   3  219.18   10.10
  -2  -2   3  216.18    9.10
  -2  -2   2   30.30    3.70
   2  -2  -2   34.30    3.60
  -2  -2   2   32.30    2.70
  -2   2   1   11.90    2.00
   2   2  -1   12.00    1.90
  -2   2   1    8.80    2.30
   2   2  -1   13.90    2.10
  -2   2   1   14.80    2.20
  -2  -2   1   12.20    2.20
  -2  -2   1   12.60    1.70
   2  -2  -1    9.70    1.80
   2  -2  -1   14.10    2.40
  -2   2   0 1203.08   36.50
   2   2   0 1092.89   36.80
  -2   2   0 1109.49   38.70
  -2   2   0 1116.09   37.00
   2   2   0 1202.88   37.20
   2  -2   0 1200.88   37.40
   2  -2   0 1077.79   38.10
  -2  -2   0 1160.18   37.10
   2  -2   0 1166.98   36.30
  -2  -2   0 1141.69   37.10
   2   2   1   28.90    2.70
   2   2   1   30.40    3.60
   2   2   1   35.90    4.10
  -2   2  -1   19.50    4.90
  -2   2  -1   31.00    3.00
   2  -2   1   25.50    3.20
  -2  -2  -1   31.20    4.10
   2  -2   1   38.70    6.50
  -2  -2  -1   35.10    3.60
  -2  -2  -1   32.80    3.00
   2  -2   1   32.40    2.90
   2   2   2 6301.27  197.18
  -2   2  -2 6668.33  197.28
   2   2   2 6308.17  199.38
   2   2   2 6524.85  198.18
  -2  -2  -2 6279.37  198.98
   2  -2   2 6248.27  201.28
   2  -2   2 6420.56  197.08
  -2  -2  -2 6633.24  197.98
  -2  -2  -2 6969.50  198.08
   2   2   3    9.40    2.50
  -2   2  -3    6.90    1.90
   2   2   3   11.80    3.30
  -2   2  -3   -3.70    5.20
   2   2   3    7.30    2.90
  -2  -2  -3    6.90    2.40
  -2  -2  -3    9.30    2.90
  -2  -2  -3    7.70    3.00
   2  -2   3   14.70    5.50
  -2  -2  -3    8.40    2.50
   2  -2   3    8.40    4.50
  -2   2  -4 2048.90   67.19
  -2   2  -4 2097.99   68.89
   2   2   4 2139.79   68.09
   2   2   4 2236.48   69.49
   2   2   4 2122.19   69.89
  -2  -2  -4 2238.58   68.39
  -2  -2  -4 2192.28   70.49
   2  -2   4 2158.18   69.19
   2  -2   4 1797.62   71.99
  -2  -2  -4 2134.39   69.89
  -2  -2  -4 2088.39   68.59
   2   2   5  165.58   11.60
   2   2   5  157.18    9.80
   2   2   5  174.48   10.60
  -2   2  -5  159.08   10.40
   2  -2   5  150.98   14.40
   2  -2   5  162.88   10.40
  -2  -2  -5  171.28   11.10
   2  -2   5  171.68    8.10
  -2  -2  -5  154.18   10.30
  -2  -2  -5  154.98   10.80
   2   2   6   26.60    6.20
  -2   2  -6   27.60    5.30
   2   2   6   30.40    5.20
   2   2   6   28.40    5.00
  -2  -2  -6   33.70    7.20
  -2  -2  -6   29.70    5.50
   2  -2   6   29.90    4.70
  -2  -2  -6   31.40    5.70
   2  -2   6   29.50    5.30
   2   2   7  475.25   21.20
   2   2   7  472.15   21.80
   2   2   7  492.15   25.20
  -2   2  -7  457.65   22.20
   2  -2   7  483.65   18.00
  -2  -2  -7  481.55   22.50
  -2  -2  -7  489.35   23.10
   2  -2   7  475.85   22.40
   2  -2   7  457.15   29.10
   2   2   8  526.45   28.00
   2   2   8  517.85   24.00
  -2   2  -8  539.95   24.90
   2   2   8  512.75   23.40
   2  -2   8  501.75   24.20
   2  -2   8  529.05   31.00
  -2  -2  -8  527.35   25.00
  -2  -2  -8  523.75   25.00
  -2   2  -9  522.65   33.70
   2   2   9  652.03   27.80
  -2   2  -9  642.54   28.70
   2   2   9  648.64   31.60
  -2  -2  -9  595.94   28.60
   2  -2   9  597.34   34.30
  -2  -2  -9  584.74   28.50
  -2   2 -10   95.99   19.40
  -2   2 -10  103.49   12.30
   2   2  10   79.29   11.40
   2   2  10  113.69   11.40
   2  -2  10   96.49   12.10
   2  -2  10  102.99   10.80
   2  -2  10  140.99   20.30
  -2  -2 -10  108.89   12.90
  -2  -2 -10  108.79   13.00
  -2  -2 -10  118.59   11.00
   2   2  11    2.50    4.80
  -2   2 -11   -6.60    4.80
  -2   2 -11  -11.50    8.40
   2   2  11   -4.00    7.90
  -2  -2 -11   -0.20    6.30
  -2  -2 -11    3.60    4.30
   2  -2  11   -3.70    5.20
   2  -2  11    3.60    9.90
   2   2  12  -10.60    8.50
  -2   2 -12    7.30    7.30
   2   2  12    1.80    6.00
   2  -2  12    0.00    5.90
  -2  -2 -12    8.20    5.40
  -2  -2 -12   -6.90    6.70
   2  -2  12    9.20   10.80
  -2  -2 -12    3.60    6.60
  -2   2 -13  572.74   32.20
  -2  -2 -13  547.35   32.10
  -2  -2 -13  597.14   28.40
   2  -2  13  595.84   29.90
   2  -2  13  596.74   41.40
  -2  -2 -13  589.74   33.70
  -2   2 -14   12.20    8.80
   2   2  14   -2.30   12.40
  -2  -2 -14   -4.00    6.30
   2  -2  14    8.10    6.90
  -2  -2 -14   10.50    9.00
   2  -2  14    7.40   11.80
  -2   2 -15  418.96   29.10
  -2  -2 -15  444.96   30.60
  -2  -2 -15  483.35   25.60
   2  -2  15  416.26   36.30
   2   2  16   13.00   15.50
  -2   2 -16    6.20    8.30
   2  -2  16    6.10   11.30
  -2  -2 -16   18.30    7.50
  -2  -2 -16    6.00    8.20
  -2   2 -17    0.00    9.00
   2   2  17  -15.60   16.30
   2  -2  17    3.90   10.70
  -2  -2 -17   -0.80   11.10
  -2  -2 -17   -1.50    9.00
  -2   2 -18    1.80    8.20
   2   2  18   -9.80   18.20
  -2  -2 -18   -5.00    9.50
  -2  -2 -18  -11.60    8.40
   2  -2  18    1.20   14.90
   2   2  19   94.79   24.40
  -2   2 -19  160.98   22.80
  -2  -2 -19  156.48   19.50
  -2  -2 -19  151.58   24.40
   2  -2  19  130.89   28.10
   2   3 -20   65.49   14.80
   2   3 -20   64.09   14.30
   2  -3 -20   57.69   16.70
   2  -3 -20   54.69   11.20
   2   3 -19   -2.40    9.30
  -2   3  19   37.10   14.80
   2   3 -19   13.60   10.50
   2  -3 -19   12.50    9.00
   2  -3 -19   11.40   11.80
   2   3 -18  122.79   20.00
   2   3 -18  162.98   22.20
  -2   3  18  195.88   26.40
   2  -3 -18  176.58   23.40
  -2  -3  18  142.59   18.20
   2   3 -17   -1.50    7.50
   2   3 -17   -4.60    8.30
  -2   3  17   -8.50   11.00
   2  -3 -17   -4.60    9.50
   2  -3 -17   -7.80    7.20
   2  -3 -17    8.70    6.70
  -2  -3  17   -7.20    6.80
   2   3 -16   -0.10    7.80
   2   3 -16   -7.40    6.20
  -2  -3  16   -8.20    6.40
   2  -3 -16   -9.00    6.70
  -2   3  15   14.80   12.50
   2   3 -15   16.80    7.30
   2   3 -15   17.70    8.70
  -2  -3  15    7.50    6.00
   2  -3 -15   16.20    8.60
   2  -3 -15    1.40    8.70
   2   3 -14  291.77   22.60
   2   3 -14  276.77   21.60
  -2   3  14  301.47   29.50
   2  -3 -14  292.07   20.20
   2  -3 -14  234.68   23.40
   2  -3 -14  273.77   22.20
  -2  -3  14  313.37   18.40
  -2  -3  14  273.07   28.00
   2   3 -13   -9.40    5.40
   2   3 -13    1.30    5.90
  -2   3  13   23.40   11.60
  -2   3  13    1.30    5.10
  -2  -3  13  -11.60    8.90
   2  -3 -13   -7.00    5.40
   2  -3 -13    2.30    6.80
   2  -3 -13    1.10    6.70
  -2  -3  13    2.30    4.30
  -2   3  12  310.67   18.80
   2   3 -12  294.57   20.00
   2   3 -12  285.77   20.70
  -2  -3  12  295.27   26.00
   2  -3 -12  308.27   21.90
  -2  -3  12  327.57   16.60
   2  -3 -12  291.87   19.00
   2  -3 -12  307.17   21.40
  -2  -3  12  296.57   19.60
  -2   3  11   -5.50    6.20
  -2   3  11    9.00    4.20
   2   3 -11    2.00    5.60
   2   3 -11   -0.90    4.90
  -2   3  11    3.90    4.70
   2  -3 -11    3.90    5.00
  -2  -3  11    9.20    3.70
   2  -3 -11   -4.90    5.10
   2  -3 -11    6.80    4.60
  -2  -3  11    5.70    7.90
  -2  -3  11   -1.00    5.00
   2   3 -10    2.70    5.90
  -2   3  10   15.20    4.60
  -2   3  10   21.90    4.90
   2   3 -10    8.70    5.40
   2   3 -10   13.20    5.20
  -2  -3  10   14.30    5.40
   2  -3 -10   16.50    6.40
   2  -3 -10    8.60    5.40
  -2  -3  10   16.70    3.90
  -2  -3  10   10.40    6.80
   2  -3 -10   16.80    4.80
  -2   3   9  192.18   12.50
   2   3  -9  181.48   13.30
   2   3  -9  181.78   13.10
  -2   3   9  197.88   12.70
  -2   3   9  172.48   15.10
   2  -3  -9  191.38   14.20
  -2  -3   9  198.08   12.40
   2  -3  -9  187.58   11.80
  -2  -3   9  173.18   13.20
   2  -3  -9  173.88   14.20
   2   3  -8  253.57   23.00
   2   3  -8  333.37   17.10
  -2   3   8  321.37   16.40
   2   3  -8  322.27   17.10
  -2   3   8  333.37   16.60
  -2   3   8  334.07   18.50
   2  -3  -8  310.27   17.90
   2  -3  -8  315.77   17.70
   2  -3  -8  331.67   15.40
  -2  -3   8  334.87   17.00
   2   3  -7  286.37   20.10
  -2   3   7  287.97   14.30
  -2   3   7  229.88   15.40
   2   3  -7  276.57   15.20
   2   3  -7  298.77   14.90
  -2   3   7  284.07   14.60
  -2  -3   7  289.77   14.90
   2  -3  -7  279.27   13.10
   2  -3  -7  286.57   15.80
   2  -3  -7  290.37   15.90
   2   3  -6  111.39    8.50
   2   3  -6  113.69    9.10
  -2   3   6  117.89    8.50
   2   3  -6  111.19   11.80
  -2   3   6  123.29    9.30
  -2   3   6  124.89    8.80
   2  -3  -6  119.89    9.40
  -2  -3   6  112.89    8.50
   2  -3  -6  119.19    9.60
   2   3  -5  352.66   15.00
  -2   3   5  337.37   15.30
   2   3  -5  330.97   18.80
  -2   3   5  355.76   15.30
   2   3  -5  363.66   15.90
   2  -3  -5  345.97   15.80
   2  -3  -5  359.86   16.50
   2  -3  -5  349.87   15.80
  -2   3   4   54.59    5.40
  -2   3   4   56.59    4.50
  -2   3   4   51.59    5.30
   2   3  -4   55.39    5.70
   2   3  -4   47.20    4.90
  -2  -3   4   52.99    5.00
  -2  -3   4   57.49    5.80
   2  -3  -4   63.79    5.90
   2  -3  -4   54.09    5.60
   2  -3  -4   51.59    6.10
   2   3  -3  232.88   11.00
  -2   3   3  224.08   11.00
  -2  -3   3  257.27   11.90
  -2  -3   3  229.18    9.80
  -2  -3   3  220.18    8.70
   2  -3  -3  225.68   10.90
   2  -3  -3  221.28   11.30
   2  -3  -3  253.07   12.80
   2   3  -2  221.68   10.60
   2   3  -2  208.78    8.90
  -2   3   2  226.98   10.90
  -2   3   2  244.38   11.60
  -2  -3   2  275.27   12.80
   2  -3  -2  225.18   11.10
   2  -3  -2  247.78   10.70
  -2  -3   2  216.18    9.10
   2  -3  -2  230.68   10.50
   2   3  -1  666.93   23.50
  -2   3   1  679.73   23.70
   2   3  -1  609.84   22.30
  -2   3   1  690.33   23.70
  -2  -3   1  666.13   23.80
   2  -3  -1  660.03   23.70
   2  -3  -1  679.73   23.20
   2   3   0    3.70    1.80
   2   3   0    6.70    2.40
  -2   3   0    3.20    1.70
  -2   3   0   -2.50    3.30
  -2   3   0    7.40    2.10
  -2  -3   0    4.20    2.00
  -2  -3   0    5.70    1.50
   2  -3   0    7.80    2.20
  -2  -3   0    8.70    2.30
   2  -3   0    4.80    2.00
  -2   3  -1 3132.69   93.19
  -2   3  -1 2886.31   93.59
  -2   3  -1 3069.89   97.39
   2   3   1 3055.39   94.39
   2   3   1 3036.90   94.19
   2   3   1 2873.01   92.19
  -2  -3  -1 3402.06   95.09
   2  -3   1 3093.79   93.39
  -2  -3  -1 2873.61   92.59
  -2  -3  -1 2955.60   94.49
   2  -3   1 2831.82   96.49
   2  -3   1 2840.92   93.39
  -2   3  -2   35.10    7.80
   2   3   2   38.60    3.90
  -2   3  -2   40.60    4.20
   2   3   2   37.50    5.10
   2   3   2   41.70    5.50
  -2  -3  -2   33.20    5.30
   2  -3   2   39.70    4.40
  -2  -3  -2   36.10    4.00
   2  -3   2   36.30    4.30
  -2  -3  -2   44.50    5.10
  -2   3  -3   78.79   11.40
   2   3   3   64.39    7.20
   2  -3   3   74.69   10.10
  -2  -3  -3   66.29    6.00
   2   3   4   47.80    6.30
   2   3   4   37.60    4.90
   2   3   4   39.20    6.30
  -2   3  -4   41.70    5.00
  -2  -3  -4   44.90    5.90
  -2  -3  -4   31.90    5.10
   2  -3   4   26.20    6.30
  -2  -3  -4   31.10    4.70
   2  -3   4   41.00    6.20
   2   3   5  707.63   28.80
  -2   3  -5  683.03   26.10
   2   3   5  733.83   28.20
   2   3   5  707.33   26.60
  -2  -3  -5  693.73   28.30
  -2  -3  -5  680.73   27.50
   2  -3   5  774.22   33.40
   2  -3   5  719.63   28.20
  -2  -3  -5  675.03   28.80
  -2  -3  -5  701.63   27.10
  -2   3  -6   50.19    6.70
   2   3   6   47.70    6.70
   2   3   6   42.70    7.00
  -2   3  -6   41.30    6.70
   2   3   6   46.70    8.70
   2  -3   6   47.30    7.20
   2  -3   6   60.39    5.50
  -2  -3  -6   43.90    6.30
   2  -3   6   46.80    9.30
  -2  -3  -6   37.10    7.30
  -2  -3  -6   44.80    7.10
  -2  -3  -6   46.50    7.10
   2   3   7  250.07   15.00
  -2   3  -7  222.98   14.50
   2   3   7  233.08   16.10
   2   3   7  252.17   13.80
  -2   3  -7  209.08   13.20
  -2  -3  -7  234.38   15.00
  -2  -3  -7  216.98   13.60
  -2  -3  -7  230.98   16.00
   2  -3   7  204.18   20.20
  -2  -3  -7  238.88   15.20
   2  -3   7  237.58   14.80
   2  -3   7  231.28   11.00
   2   3   8   42.20    8.40
  -2   3  -8   48.10    7.80
  -2   3  -8   32.50    6.90
   2   3   8   38.30    6.30
   2   3   8   32.70    6.10
  -2  -3  -8   36.80    7.40
  -2  -3  -8   44.60    9.40
  -2  -3  -8   40.10    7.30
   2  -3   8   30.60   10.00
   2  -3   8   36.80    7.10
   2  -3   8   40.80    5.30
  -2  -3  -8   39.00    6.40
  -2   3  -9  205.28   15.50
   2   3   9  221.38   19.10
   2   3   9  155.48   19.40
   2   3   9  160.38   17.00
  -2   3  -9  200.88   13.70
   2  -3   9  225.98   21.50
  -2  -3  -9  212.08   15.60
   2  -3   9  210.08   15.80
  -2  -3  -9  212.78   16.50
   2   3  10  543.05   27.10
  -2   3 -10  533.45   25.80
   2   3  10  548.45   26.20
   2   3  10  495.85   31.50
  -2   3 -10  568.74   27.90
  -2  -3 -10  538.85   28.20
   2  -3  10  542.75   27.60
  -2  -3 -10  562.54   28.50
   2  -3  10  594.74   34.80
  -2   3 -11    7.50    6.20
   2   3  11    6.00    6.10
  -2   3 -11    5.80   14.50
   2   3  11   -7.50    9.60
  -2   3 -11   28.70    7.90
  -2  -3 -11    1.30    6.70
   2  -3  11   25.80   10.20
  -2  -3 -11    5.80    6.60
  -2   3 -12  241.68   20.20
  -2   3 -12  229.58   19.00
  -2  -3 -12  276.77   22.30
   2  -3  12  253.37   27.30
   2  -3  12  263.27   18.00
  -2  -3 -12  242.38   21.90
  -2  -3 -12  257.37   18.90
   2   3  13   -4.10   10.00
  -2   3 -13   19.80    7.40
  -2   3 -13   26.40    9.70
   2  -3  13    3.00    6.80
  -2  -3 -13   -2.50    8.10
  -2  -3 -13   13.60    7.50
   2  -3  13   20.70   12.20
  -2  -3 -13    3.70    6.30
   2   3  14  -12.60   10.80
  -2   3 -14    1.30    7.80
  -2   3 -14    6.90    6.70
   2  -3  14   -2.50    7.30
  -2  -3 -14   -7.20    7.90
   2  -3  14   -7.70   10.00
  -2  -3 -14    4.20    8.20
  -2   3 -15   -1.50    8.90
  -2   3 -15   14.40    7.50
   2   3  15   31.50   13.60
  -2  -3 -15   11.00    9.90
   2  -3  15   12.70   11.30
  -2  -3 -15    7.00    7.20
  -2   3 -16  259.37   23.80
  -2   3 -16  260.77   22.50
  -2  -3 -16  243.88   25.10
  -2  -3 -16  254.37   21.10
   2  -3  16  276.17   32.80
  -2   3 -17   22.40   10.90
   2   3  17   25.60   18.30
  -2   3 -17   33.10   10.20
  -2  -3 -17   20.40    9.90
   2  -3  17   37.10   15.80
  -2  -3 -17   31.40   12.20
  -2   3 -18  254.97   25.80
  -2   3 -18  228.88   24.00
   2   3  18  200.28   38.70
  -2  -3 -18  262.57   27.70
  -2  -3 -18  235.68   23.70
   2  -3  18  250.17   31.80
  -2   4  19   71.79   17.90
   2   4 -19   47.90   13.10
   2   4 -19   43.70   12.10
   2  -4 -19   35.70   13.70
   2  -4 -19   51.39   11.30
  -2  -4  19   43.80   12.70
   2   4 -18   31.30   11.50
  -2   4  18   13.70   13.50
   2   4 -18   19.60   11.40
   2  -4 -18   15.10    9.10
  -2  -4  18   23.50    8.50
   2  -4 -18   18.20   11.40
  -2   4  17  138.49   25.90
   2   4 -17  156.28   20.80
   2   4 -17  154.88   20.10
   2  -4 -17   86.89   23.50
  -2  -4  17  160.58   21.50
   2  -4 -17  153.78   17.20
  -2   4  16   -3.40   14.40
   2   4 -16    7.50    7.20
   2   4 -16    3.50    8.80
   2  -4 -16   -2.60    6.80
  -2  -4  16   14.20    6.40
   2  -4 -16    7.90    9.10
   2   4 -15    1.20    6.60
   2   4 -15   -4.40    6.50
  -2   4  15   22.70   15.80
   2  -4 -15  -10.00    7.30
  -2  -4  15   -1.70    4.90
   2  -4 -15  -10.90    8.30
   2  -4 -15    8.90    5.90
   2   4 -14   29.90    8.50
   2   4 -14   14.00    8.20
   2  -4 -14   20.60    8.80
   2  -4 -14   14.80    9.10
   2  -4 -14   15.20    6.60
  -2  -4  14   15.60    5.30
   2   4 -13  321.57   22.00
   2   4 -13  321.27   22.60
   2  -4 -13  322.07   20.00
   2  -4 -13  284.17   24.20
   2  -4 -13  302.47   23.90
  -2  -4  13  343.27   17.90
   2   4 -12   19.60    7.30
   2   4 -12   11.60    6.80
  -2   4  12   16.00    7.50
   2  -4 -12   11.20    7.70
  -2  -4  12   16.70    4.90
   2  -4 -12   11.50    7.90
   2  -4 -12   17.00    6.10
  -2  -4  12   16.70    6.10
   2   4 -11  578.94   36.90
  -2   4  11  595.84   28.50
   2   4 -11  590.24   29.20
  -2   4  11  656.43   30.60
   2  -4 -11  595.44   27.20
  -2  -4  11  627.24   29.50
  -2  -4  11  636.14   25.00
   2  -4 -11  599.74   31.70
   2  -4 -11  592.54   30.90
  -2   4  10   60.79    8.50
   2   4 -10   65.09   10.10
  -2   4  10   56.09    8.80
   2   4 -10   37.00    7.50
   2  -4 -10   47.10    8.90
   2  -4 -10   50.49    8.60
  -2  -4  10   51.99    8.20
   2  -4 -10   58.79    8.30
  -2  -4  10   60.69    7.30
  -2   4   9   96.59   11.80
  -2   4   9   99.29   12.20
   2   4  -9   94.49   10.30
  -2   4   9   94.19    9.70
   2   4  -9   91.09   10.50
   2  -4  -9   85.69   11.30
   2  -4  -9   95.59    8.90
   2  -4  -9   77.79   11.40
  -2  -4   9   80.69   10.10
  -2   4   8  386.96   19.50
   2   4  -8  378.86   25.80
   2   4  -8  395.86   19.70
  -2   4   8  384.26   18.90
  -2   4   8  416.36   19.30
   2   4  -8  406.16   19.70
  -2  -4   8  422.56   19.90
   2  -4  -8  398.46   21.40
   2  -4  -8  392.66   20.90
   2  -4  -8  386.26   19.70
   2   4  -7   28.90    5.50
  -2   4   7   25.00    4.90
  -2   4   7   28.80    5.60
   2   4  -7   13.80    8.30
  -2   4   7   28.30    4.70
   2   4  -7   27.10    5.40
   2  -4  -7   30.30    5.90
   2  -4  -7   30.20    6.00
   2  -4  -7   25.20    6.20
  -2  -4   7   29.80    5.60
   2   4  -6 1952.10   65.39
   2   4  -6 2011.70   72.09
  -2   4   6 1925.51   66.09
   2   4  -6 1950.80   66.39
  -2   4   6 2028.80   65.89
  -2   4   6 1893.51   64.29
   2  -4  -6 1960.00   66.59
   2  -4  -6 2116.89   68.59
  -2  -4   6 1940.71   66.89
   2  -4  -6 1995.00   66.99
  -2  -4   6 2019.40   65.99
  -2   4   5  384.96   17.10
   2   4  -5  372.16   17.20
   2   4  -5  355.86   20.80
  -2   4   5  368.26   16.10
  -2   4   5  360.76   16.60
  -2  -4   5  374.56   16.20
  -2  -4   5  358.56   14.50
   2  -4  -5  381.26   17.40
   2  -4  -5  380.76   17.40
  -2  -4   5  389.16   17.80
   2  -4  -5  373.16   18.20
  -2   4   4   51.59    5.70
   2   4  -4   56.29    6.30
  -2   4   4   47.70    6.00
   2  -4  -4   50.19    6.40
   2  -4  -4   43.70    6.30
   2  -4  -4   42.00    6.70
  -2  -4   4   62.29    5.50
  -2  -4   4   42.50    4.80
  -2  -4   4   47.80    6.40
  -2   4   3  165.58   10.00
   2   4  -3  174.08    9.90
  -2   4   3  176.68   10.40
   2   4  -3  161.08    7.80
   2  -4  -3  181.58   10.90
  -2  -4   3  178.98   10.50
   2  -4  -3  180.78    9.90
  -2  -4   3  165.38    8.90
  -2  -4   3  190.28    9.00
   2  -4  -3  185.08   10.10
  -2   4   2 1802.62   57.89
   2   4  -2 1679.03   55.69
   2   4  -2 1781.62   57.69
  -2   4   2 1752.52   58.19
  -2  -4   2 1714.83   56.09
  -2  -4   2 1816.52   58.49
   2  -4  -2 1760.82   58.19
   2  -4  -2 1793.32   57.49
   2   4  -1   66.69    5.20
  -2   4   1   68.69    5.80
   2   4  -1   64.19    6.00
  -2   4   1   56.89    6.00
  -2  -4   1   61.49    6.10
  -2  -4   1   72.19    5.60
   2  -4  -1   78.19    5.90
   2  -4  -1   62.39    6.10
  -2   4   0 1014.00   33.80
   2   4   0  986.70   33.60
  -2   4   0  987.50   34.00
  -2   4   0  968.30   36.50
   2   4   0 1010.90   34.40
  -2  -4   0 1013.30   34.40
  -2  -4   0  959.80   34.00
   2  -4   0  904.01   36.80
   2  -4   0  977.10   33.90
   2   4   1   30.50    4.50
  -2   4  -1   20.40    5.10
  -2   4  -1   31.40    4.40
   2   4   1   29.60    4.10
  -2   4  -1   30.70    5.00
   2  -4   1   25.10    3.60
  -2  -4  -1   32.70    4.90
  -2  -4  -1   31.10    3.80
  -2  -4  -1   26.10    4.10
   2   4   2    4.50    2.90
  -2   4  -2    6.50    4.60
   2   4   2    2.90    2.20
  -2   4  -2    8.40    2.50
   2   4   2    4.20    2.00
   2  -4   2    6.20    2.20
   2  -4   2    5.90    3.00
  -2  -4  -2    5.00    2.20
  -2  -4  -2    6.40    2.50
  -2  -4  -2    3.20    2.40
  -2   4  -3  361.26   22.00
   2   4   3  366.86   16.90
   2   4   3  345.17   16.50
  -2   4  -3  381.56   15.40
   2   4   3  365.86   16.90
   2  -4   3  344.77   15.00
  -2  -4  -3  348.07   15.50
  -2  -4  -3  371.16   16.20
   2  -4   3  357.36   20.20
   2  -4   3  389.86   16.00
  -2  -4  -3  376.96   17.90
   2   4   4  770.52   29.80
   2   4   4  755.62   29.80
  -2   4  -4  755.62   27.70
   2   4   4  758.22   30.60
   2   4   4  744.93   27.70
  -2  -4  -4  738.13   28.60
  -2  -4  -4  786.02   31.10
   2  -4   4  772.72   29.80
  -2  -4  -4  770.42   29.00
   2  -4   4  783.82   34.30
   2  -4   4  766.32   28.50
   2   4   5  482.45   20.30
   2   4   5  509.75   22.80
  -2   4  -5  500.05   20.50
   2   4   5  489.15   22.90
  -2  -4  -5  483.75   23.50
   2  -4   5  489.85   27.00
  -2  -4  -5  474.55   21.60
   2  -4   5  525.45   22.60
  -2  -4  -5  504.55   21.60
  -2   4  -6 1970.20   65.49
   2   4   6 2053.49   68.09
   2   4   6 1950.01   65.59
   2   4   6 1917.01   68.29
  -2  -4  -6 1918.01   69.09
  -2  -4  -6 1962.80   67.39
   2  -4   6 1977.80   73.79
   2  -4   6 1978.20   67.89
  -2  -4  -6 1999.60   66.79
   2   4   7    6.90    4.40
   2   4   7    6.50    4.00
   2   4   7   13.30    3.80
  -2   4  -7   -3.50    6.00
  -2   4  -7    8.20    3.50
  -2  -4  -7    4.50    4.60
  -2  -4  -7   11.20    4.50
  -2  -4  -7    4.20    3.90
   2  -4   7   10.70    4.90
   2  -4   7   -3.20    6.30
  -2  -4  -7    8.90    5.00
  -2   4  -8  129.39   11.20
   2   4   8  148.89   10.90
   2   4   8   87.99   16.00
   2   4   8  142.09   13.80
  -2  -4  -8  146.99   13.00
  -2  -4  -8  134.19   13.90
   2  -4   8  150.18   12.80
  -2  -4  -8  149.39   12.00
  -2  -4  -8  128.59   12.60
   2  -4   8  134.09    8.70
   2  -4   8  149.99   17.50
  -2   4  -9  347.37   28.80
   2   4   9  350.36   19.70
  -2   4  -9  385.66   20.20
   2   4   9  382.56   21.50
   2   4   9  367.56   23.50
   2  -4   9  425.36   29.20
  -2  -4  -9  411.96   21.20
  -2  -4  -9  434.76   25.80
  -2  -4  -9  360.86   21.60
  -2  -4  -9  384.16   23.00
   2  -4   9  367.06   21.70
   2   4  10  225.08   20.80
   2   4  10  187.28   16.20
   2   4  10  195.28   15.00
  -2   4 -10  199.98   16.10
  -2   4 -10  227.58   17.80
   2  -4  10  238.68   23.90
   2  -4  10  175.38   16.20
  -2  -4 -10  201.98   18.50
  -2  -4 -10  209.58   16.30
  -2  -4 -10  192.28   17.40
  -2  -4 -10  211.18   18.00
  -2   4 -11  326.17   22.70
  -2   4 -11  316.87   30.50
   2   4  11  362.86   27.80
  -2  -4 -11  359.66   22.90
  -2  -4 -11  354.66   24.10
   2  -4  11  355.26   29.50
  -2   4 -12  179.68   16.60
   2   4  12  112.49   23.50
  -2   4 -12  182.48   18.40
  -2  -4 -12  161.28   18.20
   2  -4  12  180.88   24.40
  -2  -4 -12  146.09   19.80
  -2   4 -13   -7.20    7.10
   2   4  13   13.70   13.00
  -2   4 -13   -4.60    6.50
  -2  -4 -13   -9.20    6.60
   2  -4  13   -0.20    7.10
  -2  -4 -13    3.00    6.80
  -2   4 -14   37.60    8.80
  -2   4 -14   25.10    9.30
   2  -4  14   22.40    8.20
   2  -4  14    5.50   12.40
  -2  -4 -14   28.30    9.50
  -2  -4 -14   17.30    9.70
  -2  -4 -14   15.50    8.90
   2   4  15   11.60   12.40
  -2   4 -15   28.50   10.90
  -2   4 -15   32.30    9.60
   2  -4  15   26.80   14.80
  -2  -4 -15   30.70    9.20
   2  -4  15   43.60   11.40
  -2  -4 -15   38.70   10.80
  -2   4 -16    8.30   10.00
  -2   4 -16   10.80    7.90
   2   4  16   15.90   12.90
  -2  -4 -16   18.40   10.90
  -2  -4 -16   -5.40    7.80
   2  -4  16    0.30   11.10
  -2   4 -17   12.40   10.10
  -2   4 -17    0.50    8.30
   2   4  17   29.70   17.10
  -2  -4 -17   -8.00    9.40
  -2  -4 -17   10.70   10.80
  -2   4 -18   37.70   12.30
   2   4  18   10.70   19.00
  -2   4 -18   24.50   10.50
  -2  -4 -18   18.50   12.70
  -2  -4 -18   -4.20    9.30
   2  -4  18   25.60   14.90
  -2   5  19   65.39   18.50
   2   5 -19   59.49   13.40
   2  -5 -19   61.59   13.50
  -2  -5  19   27.90   11.30
   2  -5 -19   59.69   16.50
   2   5 -18   11.70   12.10
  -2   5  18  -14.10   14.90
   2   5 -18   21.30   11.10
  -2  -5  18   33.10   10.50
   2  -5 -18   12.30   11.50
  -2  -5  17   46.90    9.00
   2  -5 -17   69.39   15.20
   2  -5 -17   28.20    9.10
  -2   5  16   -0.80   13.40
   2   5 -16    5.40    7.30
   2   5 -16   -1.90    8.30
  -2  -5  16   13.40    6.70
   2  -5 -16   -7.20   10.10
   2  -5 -16   -8.60    8.00
   2  -5 -16   -5.20    9.10
   2   5 -15   -5.80    7.70
  -2   5  15   29.50   12.70
   2   5 -15   -1.50    6.00
   2  -5 -15   -2.20    7.40
  -2  -5  15   -5.50    5.10
   2  -5 -15   -3.20    8.10
   2   5 -14   56.59   11.90
   2   5 -14   44.00    9.90
   2  -5 -14   67.79   12.80
   2  -5 -14   40.40   10.60
  -2  -5  14   69.79    9.70
   2   5 -13   93.39   15.00
   2  -5 -13   65.39   12.60
  -2  -5  13   66.89   10.40
   2  -5 -13   57.39   12.00
  -2   5  12   32.00    9.60
   2   5 -12   12.80    7.20
   2   5 -12   20.40    7.50
   2  -5 -12   16.00    9.00
   2  -5 -12   20.50    9.20
  -2  -5  12   20.80    5.20
   2   5 -11  671.73   31.70
   2   5 -11  648.14   31.30
   2  -5 -11  653.23   34.00
  -2  -5  11  639.04   31.40
   2  -5 -11  649.93   33.30
  -2   5  10   -0.10    4.40
   2   5 -10    3.60    4.70
   2   5 -10    3.00    5.50
  -2   5  10    0.50    4.20
  -2   5  10   13.00    6.90
   2   5 -10   -9.30    8.70
   2  -5 -10    0.40    5.90
   2  -5 -10   -2.70    4.30
   2  -5 -10    2.20    5.30
  -2  -5  10   -1.70    8.60
   2   5  -9 1008.30   39.50
  -2   5   9 1005.90   39.60
   2   5  -9  930.91   48.10
  -2   5   9 1023.00   39.30
   2   5  -9 1044.40   40.30
  -2   5   9 1034.40   38.80
   2  -5  -9  862.01   50.69
   2  -5  -9 1114.79   44.90
  -2  -5   9 1014.40   40.10
   2  -5  -9 1042.00   40.50
  -2   5   8   -0.50    4.40
  -2   5   8   -0.40    3.40
  -2   5   8    1.90    3.20
   2   5  -8   -2.90    8.30
   2   5  -8    0.10    3.50
   2  -5  -8   -6.70    4.30
   2  -5  -8   -5.00    4.20
  -2  -5   8   -1.90    3.70
  -2  -5   8   -0.20    1.90
   2  -5  -8    0.30    5.70
  -2   5   7    8.20    3.60
   2   5  -7   10.30    4.00
  -2   5   7    5.40    3.50
  -2   5   7   10.30    3.60
   2   5  -7    7.70    6.00
   2  -5  -7   12.10    4.10
  -2  -5   7    9.80    2.40
  -2  -5   7    4.80    4.60
   2  -5  -7    2.10    4.20
   2  -5  -7    4.60    4.70
  -2   5   6   14.10    4.10
   2   5  -6   22.90    5.40
   2   5  -6   20.80    7.00
  -2   5   6   18.20    4.30
  -2   5   6   19.20    4.80
  -2  -5   6   20.50    4.80
  -2  -5   6    8.20    4.40
   2  -5  -6   11.80    4.50
   2  -5  -6   13.90    5.30
  -2  -5   6   27.00    4.20
   2  -5  -6   19.10    5.30
  -2   5   5 4280.07  140.39
   2   5  -5 4310.57  140.19
   2   5  -5 4319.57  146.39
  -2   5   5 4377.86  139.89
  -2  -5   5 4605.94  141.89
   2  -5  -5 4514.65  142.59
  -2  -5   5 4544.45  136.79
   2  -5  -5 4575.04  140.99
   2  -5  -5 4473.55  140.79
  -2  -5   5 4459.45  139.49
  -2   5   4   33.20    6.40
  -2   5   4   49.00    6.90
   2   5  -4   33.60    4.60
   2   5  -4   29.90    5.30
   2  -5  -4   33.40    5.40
  -2  -5   4   28.20    3.80
  -2  -5   4   38.90    6.50
  -2  -5   4   27.50    5.70
   2  -5  -4   36.90    6.10
   2  -5  -4   31.90    5.30
  -2   5   3 3060.99   98.49
   2   5  -3 3019.30   97.19
   2   5  -3 2908.91   94.59
  -2   5   3 3097.49   97.59
   2  -5  -3 3018.20   96.89
  -2  -5   3 3195.98   98.69
  -2  -5   3 2967.40   94.99
   2  -5  -3 3050.29   97.19
   2  -5  -3 3034.40   98.49
   2   5  -2   -2.70    1.90
  -2   5   2    1.80    2.00
  -2   5   2   -2.50    2.80
   2   5  -2   -1.90    2.40
   2  -5  -2    0.10    2.20
   2  -5  -2    0.10    2.20
  -2  -5   2   -3.40    2.40
  -2   5   1  283.57   13.80
  -2   5   1  287.07   14.40
   2   5  -1  293.37   13.40
   2   5  -1  303.97   14.30
   2  -5  -1  287.27   14.40
  -2  -5   1  292.27   14.50
  -2  -5   1  277.07   13.50
   2  -5  -1  295.87   13.60
  -2   5   0    9.10    2.60
  -2   5   0    8.00    4.20
  -2   5   0    8.10    3.40
   2   5   0    7.00    3.40
   2   5   0    9.70    2.70
   2  -5   0    9.70    3.60
  -2  -5   0   10.10    3.30
  -2  -5   0   11.90    3.50
   2  -5   0    9.40    3.10
  -2   5  -1 1983.60   62.39
   2   5   1 1903.81   63.49
  -2   5  -1 1948.01   66.89
   2   5   1 1864.31   62.29
  -2   5  -1 1847.12   62.19
  -2  -5  -1 1862.31   60.69
  -2  -5  -1 1854.61   63.49
  -2  -5  -1 1923.51   63.09
   2  -5   1 1949.70   62.59
   2  -5   1 1858.71   62.19
   2   5   2   48.70    6.40
   2   5   2   50.09    7.40
  -2   5  -2   38.30    7.50
  -2   5  -2   46.80    6.30
  -2   5  -2   51.89    6.20
  -2  -5  -2   47.90    7.40
   2  -5   2   41.50    5.60
  -2  -5  -2   42.10    5.60
  -2  -5  -2   56.59    6.80
   2   5   3 3426.96  111.49
  -2   5  -3 3590.64  117.19
   2   5   3 3352.86  110.49
   2   5   3 3421.26  108.29
  -2   5  -3 3421.86  108.89
  -2  -5  -3 3458.45  112.19
   2  -5   3 3614.04  110.29
  -2  -5  -3 3344.07  108.79
  -2  -5  -3 3524.25  110.39
   2  -5   3 3406.36  108.79
  -2   5  -4   23.30    4.70
   2   5   4   31.00    6.30
   2   5   4   20.70    4.80
   2   5   4   19.10    5.60
  -2   5  -4   23.60    9.20
   2   5   4   24.20    4.10
  -2  -5  -4   25.40    5.00
   2  -5   4   25.30    5.10
  -2  -5  -4   24.20    5.30
  -2  -5  -4   21.40    5.60
   2  -5   4   16.00    3.80
   2   5   5  567.84   26.20
  -2   5  -5  572.64   23.20
   2   5   5  563.84   25.60
   2   5   5  566.94   23.10
   2   5   5  578.74   25.30
  -2  -5  -5  564.54   26.90
   2  -5   5  576.14   24.10
  -2  -5  -5  563.04   24.40
   2  -5   5  585.04   31.10
  -2  -5  -5  557.24   24.40
   2  -5   5  559.54   25.30
   2  -5   5  550.44   22.30
   2   5   6   70.39    8.00
   2   5   6   83.59    9.50
  -2   5  -6   78.19    8.40
   2   5   6   71.39   10.30
  -2  -5  -6   72.99    8.80
  -2  -5  -6   59.59    8.50
   2  -5   6   80.39    9.70
  -2  -5  -6   70.19   10.80
   2  -5   6   59.19   11.20
   2   5   7 1097.29   48.80
   2   5   7 1116.89   44.00
  -2   5  -7 1139.79   41.30
   2   5   7 1129.49   40.90
  -2  -5  -7 1109.59   45.30
   2  -5   7 1095.09   43.60
  -2  -5  -7 1148.19   43.50
  -2  -5  -7 1100.09   43.10
   2  -5   7 1110.59   49.50
   2   5   8   -2.90    4.90
   2   5   8    6.50    4.50
  -2   5  -8   -2.60    6.00
   2   5   8    4.30    3.90
  -2   5  -8    0.00    4.10
  -2  -5  -8    8.70    5.50
  -2  -5  -8    0.80    5.00
   2  -5   8    5.20    7.30
  -2  -5  -8   -5.50    3.90
   2  -5   8    5.50    7.30
   2   5   9  765.62   32.90
  -2   5  -9  794.72   33.10
   2   5   9  824.32   36.70
   2   5   9  777.12   35.50
  -2  -5  -9  812.02   38.40
  -2  -5  -9  770.22   33.80
  -2  -5  -9  799.32   42.90
   2  -5   9  801.72   42.10
   2  -5   9  722.03   35.00
   2   5  10   92.09   11.20
   2   5  10   95.19   16.10
  -2   5 -10   81.59   12.80
  -2  -5 -10  108.89   14.60
   2  -5  10  116.09   19.50
  -2  -5 -10  106.29   15.90
   2   5  11  194.88   22.20
  -2   5 -11  166.48   16.10
  -2  -5 -11  168.78   20.10
   2  -5  11  165.18   23.60
  -2  -5 -11  160.38   18.20
  -2  -5 -11  160.88   17.20
   2   5  12   20.90   13.10
  -2   5 -12   29.60    8.40
  -2  -5 -12   37.20    9.50
  -2  -5 -12   34.30    9.50
   2  -5  12   29.10   12.50
  -2   5 -13    3.30    6.60
  -2  -5 -13   -8.70    6.10
  -2  -5 -13    0.40    8.20
   2  -5  13   -4.80   10.10
  -2   5 -14   10.10    6.90
   2   5  14   -6.30   12.30
  -2  -5 -14    0.80    7.50
   2  -5  14  -12.10    6.20
  -2  -5 -14  -10.80    7.10
   2  -5  14   -1.80   11.00
  -2   5 -15   24.00    8.20
   2   5  15   25.20   12.90
   2  -5  15   14.80    9.20
  -2  -5 -15   22.30   11.50
   2  -5  15   45.40   15.30
  -2  -5 -15   35.00   10.60
  -2   5 -16   18.00    8.70
   2   5  16   10.40   12.20
  -2  -5 -16   17.80    9.60
  -2  -5 -16   13.00   12.20
   2  -5  16   28.00   19.10
   2   5  17   33.30   17.00
  -2   5 -17    1.60    9.10
   2  -5  17   -2.20   13.40
  -2  -5 -17   -1.20   11.40
  -2  -5 -17   -2.60    9.80
  -2   5 -18   -1.20   15.70
   2   5  18   15.40   17.20
  -2  -5 -18    4.00   10.20
  -2  -5 -18   -0.70   12.30
   2  -5  18   22.60   14.70
  -2   6  18  -16.10   16.00
   2   6 -18    1.40    9.60
  -2  -6  18   14.90    8.90
   2  -6 -18    2.50   10.40
   2   6 -17  452.75   31.60
  -2  -6  17  462.45   25.00
   2  -6 -17  493.15   49.99
   2  -6 -17  399.76   33.30
   2   6 -16    6.90   10.00
   2   6 -16    9.20    8.90
  -2   6  16    8.00   12.70
  -2  -6  16    7.70    7.10
   2  -6 -16    2.00    9.40
   2  -6 -16   17.30   10.20
   2   6 -15   26.10    9.10
   2   6 -15   38.60   10.90
  -2   6  15   51.99   13.30
  -2  -6  15   25.20    6.60
   2  -6 -15   29.60    9.90
   2  -6 -15   17.60    9.80
   2   6 -14   13.10    6.50
   2  -6 -14   11.50    8.30
   2   6 -13  312.87   22.20
   2  -6 -13  307.47   24.10
   2  -6 -13  279.47   25.10
  -2  -6  13  315.07   17.30
   2   6 -12  111.19   15.30
  -2   6  12   81.69   17.30
   2  -6 -12  117.39   16.40
   2  -6 -12   80.89   13.50
   2   6 -11 1080.09   45.10
  -2   6  11 1094.89   45.20
  -2  -6  11 1053.59   45.50
   2  -6 -11 1157.48   48.70
  -2  -6  11 1085.99   38.20
   2  -6 -11 1137.19   49.80
   2   6 -10   49.00    9.30
  -2   6  10   69.39   11.20
  -2  -6  10   37.70    5.10
  -2  -6  10   48.70    8.50
   2  -6 -10   51.89    9.70
   2  -6 -10   47.10    9.10
  -2   6   9  542.25   26.40
  -2   6   9  538.15   25.80
   2   6  -9  496.25   35.00
  -2   6   9  569.94   25.30
   2   6  -9  570.84   27.50
  -2  -6   9  564.24   27.20
   2  -6  -9  580.74   28.70
   2  -6  -9  561.44   27.70
   2  -6  -9  586.44   30.10
  -2  -6   9  563.84   21.30
  -2   6   8   82.99   10.10
  -2   6   8   96.59    9.60
   2   6  -8  113.19   16.80
   2   6  -8   94.29   10.80
  -2   6   8   71.59    9.70
   2  -6  -8   90.59   12.50
  -2  -6   8   64.49    7.20
   2  -6  -8   95.29   10.90
   2  -6  -8   81.59   11.40
  -2  -6   8   62.89   10.00
  -2   6   7    1.60    3.90
  -2   6   7    9.00    4.00
  -2   6   7    7.70    4.00
   2   6  -7    6.90    4.40
   2   6  -7   13.90    6.50
   2  -6  -7   10.00    5.10
  -2  -6   7   11.50    2.80
  -2  -6   7    6.70    4.70
   2  -6  -7    1.10    4.90
  -2  -6   7    9.20    5.00
   2  -6  -7    5.10    4.10
  -2   6   6  440.76   20.20
  -2   6   6  428.46   20.80
  -2   6   6  428.96   20.10
   2   6  -6  456.45   21.00
   2   6  -6  422.06   26.10
   2  -6  -6  423.26   23.10
   2  -6  -6  415.36   20.80
   2  -6  -6  423.86   21.50
  -2  -6   6  438.36   22.10
  -2  -6   6  460.25   17.50
  -2  -6   6  436.86   20.40
  -2   6   5  561.94   26.60
   2   6  -5  589.24   31.30
  -2   6   5  587.94   25.50
   2   6  -5  603.84   25.40
   2  -6  -5  566.04   25.20
  -2  -6   5  633.74   22.60
  -2  -6   5  605.84   24.60
   2  -6  -5  584.14   27.30
  -2  -6   5  606.14   26.70
   2  -6  -5  598.84   25.80
  -2   6   4  110.69   11.50
   2   6  -4  136.69   10.90
  -2   6   4  130.59   10.70
   2   6  -4  107.69   12.20
   2  -6  -4  117.59   11.00
  -2  -6   4  101.69   11.20
   2  -6  -4  124.59   11.80
  -2  -6   4  112.99    9.50
  -2  -6   4  114.99    8.90
   2  -6  -4  122.79   10.30
  -2   6   3  542.35   25.30
   2   6  -3  544.55   21.90
   2   6  -3  568.54   24.00
  -2   6   3  560.84   24.10
   2  -6  -3  586.94   25.60
   2  -6  -3  592.14   24.00
   2  -6  -3  581.54   23.90
  -2  -6   3  596.74   25.50
  -2  -6   3  569.54   22.60
   2   6  -2  220.68   12.70
  -2   6   2  221.58   12.30
  -2   6   2  186.08   13.50
   2   6  -2  173.18   10.70
   2  -6  -2  188.68   11.90
  -2  -6   2  216.18   13.60
   2  -6  -2  195.68   13.30
  -2  -6   2  171.98   11.80
   2   6  -1   31.10    4.40
  -2   6   1   25.50    6.00
   2   6  -1   43.50    6.40
  -2   6   1   46.40    6.30
  -2  -6   1   32.60    5.90
  -2  -6   1   24.50    5.50
   2  -6  -1   36.70    5.90
   2  -6  -1   33.20    5.30
  -2   6   0  311.97   16.00
  -2   6   0  286.97   19.00
   2   6   0  347.77   15.50
  -2   6   0  307.57   15.60
   2   6   0  328.77   16.50
   2  -6   0  327.37   15.80
  -2  -6   0  318.77   16.30
  -2  -6   0  291.87   16.10
   2  -6   0  296.97   16.00
   2   6   1   13.20    4.70
  -2   6  -1    2.90    3.00
  -2   6  -1   -4.50    6.00
  -2   6  -1    8.80    4.00
   2   6   1    6.80    3.30
   2  -6   1    8.60    3.90
  -2  -6  -1    3.90    3.10
   2  -6   1    3.30    3.60
  -2  -6  -1    6.50    4.20
  -2  -6  -1    4.00    3.30
  -2   6  -2  208.48   12.40
  -2   6  -2  218.88   12.40
   2   6   2  209.28   14.20
   2   6   2  231.68   12.80
  -2   6  -2  171.48   17.60
   2  -6   2  207.88   12.70
   2  -6   2  208.78   13.30
  -2  -6  -2  235.48   14.60
  -2  -6  -2  205.48   11.60
  -2  -6  -2  205.58   13.10
  -2   6  -3  163.18   10.60
   2   6   3  128.59   12.00
   2   6   3  134.39   11.50
  -2   6  -3  141.69   17.60
  -2  -6  -3  148.19   11.10
   2  -6   3  148.29   10.50
   2  -6   3  144.09   11.10
  -2  -6  -3  129.09   13.00
  -2  -6  -3  132.89   10.00
   2   6   4  924.21   37.60
  -2   6  -4  950.20   44.00
  -2   6  -4  949.21   34.80
   2   6   4  947.71   36.40
   2   6   4  923.81   34.10
   2  -6   4  943.11   34.20
  -2  -6  -4  898.61   35.70
  -2  -6  -4  954.70   38.60
  -2  -6  -4  935.51   35.20
   2  -6   4  991.90   36.40
   2   6   5   -0.10    3.70
   2   6   5   10.30    4.10
   2   6   5   13.00    5.30
   2   6   5    9.50    5.00
  -2   6  -5   13.20    4.40
  -2   6  -5    0.20    8.10
  -2  -6  -5    9.80    4.70
   2  -6   5    7.60    3.70
  -2  -6  -5    7.90    5.10
   2  -6   5    8.80    3.30
   2  -6   5   12.00    5.30
  -2  -6  -5   10.70    5.10
   2   6   6   90.19   11.60
  -2   6  -6   65.49    8.90
   2   6   6   71.59   10.00
   2   6   6   69.79    8.50
  -2  -6  -6   82.89   12.00
   2  -6   6   69.89   10.10
   2  -6   6   76.29    8.10
  -2  -6  -6   65.29   10.50
   2  -6   6   63.99    9.60
  -2  -6  -6   77.09    9.80
  -2   6  -7  366.46   18.80
   2   6   7  365.86   18.60
   2   6   7  372.46   21.90
   2   6   7  357.96   20.60
   2  -6   7  372.36   22.20
  -2  -6  -7  393.06   21.30
  -2  -6  -7  359.26   19.70
   2  -6   7  370.16   17.70
  -2  -6  -7  368.26   23.30
   2   6   8  120.89   13.00
  -2   6  -8   70.49   11.50
   2   6   8  111.89   11.30
   2   6   8  112.89   13.70
  -2  -6  -8   82.49   11.80
  -2  -6  -8  100.69   14.40
   2  -6   8   85.09   12.90
   2  -6   8   98.49   18.60
   2  -6   8  121.79   10.00
  -2  -6  -8  121.99   13.20
   2   6   9  818.42   36.90
   2   6   9  787.02   33.30
  -2   6  -9  797.62   33.90
   2  -6   9  781.22   44.60
  -2  -6  -9  795.72   39.20
   2  -6   9  803.62   36.90
  -2  -6  -9  800.32   36.80
   2   6  10  147.59   17.90
  -2   6 -10  131.89   14.70
  -2  -6 -10  168.98   17.00
  -2  -6 -10  129.49   17.80
   2  -6  10  135.59   22.30
   2   6  11  115.79   19.50
  -2   6 -11  141.19   15.60
  -2  -6 -11  145.59   17.90
  -2  -6 -11  158.68   19.80
   2  -6  11  155.98   23.40
   2   6  12    0.90   11.50
  -2   6 -12   17.80    6.90
   2  -6  12    6.70   10.60
  -2  -6 -12    3.70    8.70
  -2  -6 -12    1.70    8.00
  -2   6 -13   15.90    7.20
   2   6  13  -17.40   12.70
  -2  -6 -13   -1.50    8.60
   2  -6  13   -4.80   10.50
  -2  -6 -13   -1.10    8.30
   2   6  14   -5.50   13.50
  -2   6 -14   -3.30    7.00
  -2  -6 -14   -7.50    8.40
   2  -6  14   -6.70   11.30
  -2   6 -15  127.79   17.30
   2  -6  15  146.79   17.40
  -2  -6 -15  145.29   21.30
   2   6  16   25.50   14.90
  -2   6 -16    8.70    8.70
  -2  -6 -16   -7.20    9.90
  -2  -6 -16    2.30    9.90
   2   6  17   21.00   14.40
  -2   6 -17   38.80   11.20
  -2  -6 -17   51.99   13.00
  -2  -6 -17   28.40   13.80
  -2   7  18   33.00   22.10
   2   7 -18   53.49   12.70
   2  -7 -18   70.59   19.20
  -2  -7  18   66.09   11.60
  -2   7  17   13.00   16.50
   2   7 -17   -2.40   10.50
   2  -7 -17  -20.20    9.00
  -2  -7  17   -7.10    5.20
   2  -7 -17   -4.40    8.90
  -2  -7  17   -6.70    7.60
  -2   7  16   20.80   12.20
   2   7 -16  -16.60    8.30
  -2  -7  16    0.10    6.60
   2  -7 -16    5.90   10.10
  -2  -7  16   -3.50    4.90
   2   7 -15   12.90    8.60
  -2   7  15   17.10   10.40
  -2  -7  15    6.60    6.10
   2  -7 -15   13.40    9.90
  -2  -7  15   13.90    4.80
   2  -7 -15    5.70    8.60
   2   7 -14  232.18   20.40
  -2  -7  14  235.28   13.60
   2  -7 -14  229.58   24.70
  -2  -7  14  240.78   16.00
   2  -7 -14  241.88   23.50
  -2   7  13  118.69   21.50
   2   7 -13  116.49   15.10
   2  -7 -13   85.09   13.90
   2  -7 -13   91.59   15.10
  -2  -7  13  104.99    9.50
   2   7 -12   67.19   10.60
  -2   7  12   61.09   12.20
  -2  -7  12   71.39    8.40
   2  -7 -12   72.19   13.30
   2  -7 -12   67.89   12.60
   2   7 -11  139.39   15.70
  -2   7  11  123.29   15.00
   2  -7 -11  152.08   18.00
  -2  -7  11  132.89   15.10
   2  -7 -11  139.89   18.70
  -2  -7  11  124.69    9.70
   2   7 -10   12.40    6.60
  -2   7  10   17.20    5.80
  -2  -7  10    1.10    7.00
   2  -7 -10   12.10    7.50
   2  -7 -10   19.30    8.50
  -2   7   9   -2.60    4.00
  -2   7   9   -5.00    3.90
   2  -7  -9    0.90    6.20
   2  -7  -9    4.40    6.90
  -2  -7   9  -11.60    5.40
  -2   7   8  174.08   13.00
  -2   7   8  112.79   13.10
   2   7  -8  160.98   13.80
  -2  -7   8  142.59   10.00
   2  -7  -8  180.08   16.90
  -2  -7   8  154.58   13.90
   2  -7  -8  173.98   15.30
  -2  -7   8  150.48   13.60
   2   7  -7   40.10   11.90
  -2   7   7   54.39    7.90
  -2   7   7   66.99    9.30
  -2  -7   7   49.90    8.10
  -2  -7   7   44.70    7.20
   2  -7  -7   74.39   10.80
   2  -7  -7   48.30    7.60
   2  -7  -7   39.10    8.70
  -2  -7   7   62.99    9.40
  -2   7   6   90.29   10.60
   2   7  -6  104.69   10.80
   2   7  -6  121.19   15.40
   2  -7  -6  109.49   11.40
  -2  -7   6  117.79   12.30
  -2  -7   6  104.69    8.30
  -2  -7   6   92.79   10.30
   2  -7  -6   66.99   11.40
   2  -7  -6  103.69   10.50
   2   7  -5  389.46   19.90
  -2   7   5  377.46   21.60
   2   7  -5  383.16   26.80
  -2   7   5  429.26   22.90
  -2  -7   5  424.46   22.70
  -2  -7   5  410.86   17.70
  -2  -7   5  423.56   19.80
   2  -7  -5  422.46   22.90
   2  -7  -5  431.66   20.80
   2  -7  -5  350.16   21.80
  -2   7   4   22.80    5.00
   2   7  -4   33.80    5.90
  -2   7   4   22.60    6.20
   2   7  -4   25.70    4.20
   2  -7  -4   35.20    5.70
   2  -7  -4   39.30    7.50
  -2  -7   4   26.50    4.50
   2  -7  -4   22.00    5.80
  -2  -7   4   24.60    6.50
   2   7  -3  450.85   19.70
  -2   7   3  490.05   22.30
   2   7  -3  475.05   22.00
  -2   7   3  477.05   23.70
   2  -7  -3  491.75   24.10
   2  -7  -3  477.35   21.70
   2  -7  -3  482.95   21.80
  -2  -7   3  485.05   20.80
  -2  -7   3  445.76   22.60
  -2   7   2   94.59    9.10
   2   7  -2   80.69    8.40
   2   7  -2   87.59    9.70
  -2   7   2   80.29   10.70
   2  -7  -2   68.19    8.80
  -2  -7   2   62.19    9.60
  -2  -7   2   76.59    9.20
   2  -7  -2   99.99   10.80
  -2   7   1  109.39   11.20
   2   7  -1  112.79    9.00
   2   7  -1  101.89   10.30
  -2   7   1  124.19    9.90
  -2  -7   1   94.49   10.10
   2  -7  -1  114.09   10.70
  -2  -7   1   98.99   10.90
   2  -7  -1   95.89    9.40
  -2   7   0    5.40    5.50
  -2   7   0    6.00    3.60
   2   7   0   10.50    3.60
  -2   7   0    2.70    4.20
   2   7   0    1.60    4.00
  -2  -7   0    5.10    4.30
   2  -7   0    0.90    3.60
   2  -7   0   -2.50    3.40
  -2  -7   0   -3.00    4.00
  -2  -7   0    6.70    3.40
  -2   7  -1  425.96   19.80
  -2   7  -1  406.36   24.10
   2   7   1  416.16   19.20
   2   7   1  382.16   20.80
  -2   7  -1  398.86   18.90
   2  -7   1  420.56   19.60
  -2  -7  -1  435.76   21.20
  -2  -7  -1  409.96   17.90
   2  -7   1  413.16   19.90
  -2  -7  -1  366.26   19.50
  -2   7  -2   -0.60    5.40
  -2   7  -2    1.00    3.50
  -2   7  -2   -2.40    2.50
   2   7   2   -2.50    2.60
  -2  -7  -2   -0.30    3.10
  -2  -7  -2   -4.20    3.60
   2  -7   2   -3.10    3.50
  -2   7  -3  516.95   29.10
  -2   7  -3  528.75   22.50
   2   7   3  529.85   23.30
   2   7   3  438.06   24.40
  -2  -7  -3  565.34   22.30
  -2  -7  -3  514.95   25.30
  -2  -7  -3  496.35   26.90
   2  -7   3  505.75   23.50
   2  -7   3  506.65   22.50
   2   7   4  105.39   13.60
  -2   7  -4  137.79   10.80
  -2   7  -4  140.99   23.80
   2   7   4  104.29   12.40
  -2  -7  -4  127.89   10.50
  -2  -7  -4  120.29   13.10
   2  -7   4  128.09   10.40
  -2  -7  -4  101.39   10.80
   2  -7   4  132.59   11.50
   2   7   5  168.68   18.60
   2   7   5  192.58   16.30
   2   7   5  193.18   12.30
   2   7   5  220.38   14.20
  -2   7  -5  175.68   21.70
  -2   7  -5  176.58   13.10
  -2  -7  -5  170.88   13.80
   2  -7   5  181.48   14.40
   2  -7   5  182.78   14.90
   2  -7   5  207.08   12.70
  -2  -7  -5  224.38   14.20
   2   7   6   92.39   10.90
   2   7   6   89.49    9.60
   2   7   6  111.79   13.70
  -2   7  -6   76.99   10.50
   2   7   6   77.59   12.60
   2  -7   6   84.59    9.70
  -2  -7  -6   83.59   11.10
   2  -7   6  102.19   11.20
  -2  -7  -6   94.49   13.10
  -2  -7  -6   99.49   11.10
   2  -7   6   81.79   11.80
   2   7   7   21.00    6.10
   2   7   7   21.70    6.80
  -2  -7  -7    9.10    7.00
  -2  -7  -7    3.80    6.50
   2  -7   7   20.50    4.70
  -2  -7  -7   16.70    6.30
   2  -7   7    6.50    7.70
   2  -7   7   16.90    7.10
  -2   7  -8   20.20    7.50
   2   7   8   26.50    6.40
   2   7   8   33.80    8.20
   2  -7   8   26.70    5.60
  -2  -7  -8   31.10    9.50
  -2  -7  -8   24.70    8.40
   2  -7   8   24.70    8.90
   2   7   9  228.38   19.50
  -2   7  -9  183.28   16.00
   2   7   9  211.78   15.70
  -2  -7  -9  212.58   21.00
   2  -7   9  203.08   14.10
  -2  -7  -9  246.68   19.70
   2   7  10  341.37   24.60
  -2   7 -10  346.37   21.20
   2  -7  10  341.37   18.60
  -2  -7 -10  315.47   24.00
  -2  -7 -10  331.07   26.60
   2   7  11   -5.00    8.90
  -2   7 -11   16.80    7.10
  -2  -7 -11   12.20    9.00
  -2  -7 -11   -0.70    7.80
   2  -7  11   -4.30    5.00
  -2   7 -12  334.87   21.40
   2   7  12  283.37   39.50
  -2  -7 -12  289.57   25.90
  -2  -7 -12  336.27   26.60
   2   7  13   13.90   12.70
  -2   7 -13   19.30    8.40
  -2  -7 -13   13.40   10.00
  -2  -7 -13   12.80    9.40
  -2  -7 -14  -15.60    7.90
  -2   7 -15   -2.80    7.50
  -2  -7 -15   -2.50   12.90
  -2   7 -16  160.28   20.00
  -2  -7 -16  119.79   20.70
  -2   7 -17   -7.10   13.00
   2   7  17   10.60   13.00
  -2  -7 -17   -1.00   10.60
  -2  -7 -17    1.10   13.90
   2   8 -17   16.80   10.90
  -2   8  17   22.70   14.50
   2  -8 -17   12.60   12.30
  -2  -8  17   11.40    8.50
   2  -8 -17    3.60   10.90
   2   8 -16    6.80   17.40
  -2  -8  16   -5.10    7.20
   2  -8 -16   13.40   10.60
   2  -8 -16    5.00   11.20
  -2   8  15   22.80   10.90
   2   8 -15   33.80   10.70
   2  -8 -15   39.60   19.00
  -2  -8  15   39.80    8.40
   2  -8 -15   35.70   13.30
   2   8 -14    2.50    7.00
  -2   8  14  -14.80   10.70
   2  -8 -14  -16.60    8.10
   2  -8 -14   -0.20    9.00
   2   8 -13   -0.10    6.30
   2  -8 -13   -3.80    7.90
   2  -8 -13  -11.70    8.00
   2   8 -12   15.30    6.80
  -2   8  12  -11.80    8.50
  -2  -8  12    7.10    4.50
   2  -8 -12  -10.70    8.10
   2  -8 -12   -5.50    6.90
  -2   8  11   39.40    9.40
   2   8 -11   60.39   10.10
   2  -8 -11   50.79   11.90
  -2  -8  11   59.99    8.60
   2  -8 -11   35.70   10.30
  -2   8  10   13.30    6.60
   2   8 -10   13.10    7.50
   2  -8 -10    9.50    8.20
  -2  -8  10   15.70    8.80
   2  -8 -10   24.50    9.50
  -2  -8  10   25.50    5.00
  -2   8   9   -1.20    5.00
   2   8  -9   -7.30    5.70
   2  -8  -9   -3.70    6.30
   2  -8  -9   -9.00    5.70
   2   8  -8    1.10    5.70
  -2   8   8    5.50    5.10
   2  -8  -8    0.10    6.70
   2  -8  -8    0.50    6.00
  -2  -8   8    2.00    3.70
  -2  -8   8   -0.70    5.60
   2   8  -7   44.40    8.10
  -2   8   7   55.39    9.90
   2  -8  -7   53.39    8.60
  -2  -8   7   52.39    7.70
  -2  -8   7   45.70    8.10
  -2  -8   7   35.70    7.50
   2  -8  -7   43.10    9.80
  -2   8   6  133.19   15.20
   2   8  -6  105.69   12.10
   2   8  -6  130.99   21.40
  -2  -8   6  114.39   11.50
  -2  -8   6  102.39   12.80
   2  -8  -6  125.39   13.50
  -2  -8   6  104.19    9.70
   2  -8  -6  124.39   12.70
   2  -8  -6   95.79   14.30
  -2   8   5    5.40    5.20
   2   8  -5   10.00    6.40
   2   8  -5    6.50    4.70
  -2   8   5    4.00    5.40
  -2  -8   5    2.70    4.70
   2  -8  -5    5.70    4.60
   2  -8  -5    8.80    4.80
  -2  -8   5    6.00    4.00
  -2  -8   5    2.90    4.10
   2  -8  -5   -4.10    5.30
   2   8  -4   57.49   11.00
  -2   8   4   42.90    7.10
  -2   8   4   45.00    8.50
   2   8  -4   46.60    6.80
  -2  -8   4   34.70    7.70
   2  -8  -4   56.59    8.80
   2  -8  -4   26.10    8.20
   2  -8  -4   68.59    9.20
  -2  -8   4   42.50    6.40
  -2   8   3   34.80    6.30
  -2   8   3   34.90    8.10
   2   8  -3   37.40    7.50
   2   8  -3   34.80    5.30
  -2  -8   3   37.90    6.10
   2  -8  -3   37.30    6.10
   2  -8  -3   35.60    6.20
  -2  -8   3   43.10    7.20
   2  -8  -3   28.90    6.90
   2   8  -2   56.49    7.50
  -2   8   2   44.70    7.60
  -2   8   2   50.39    8.00
   2   8  -2   57.69    9.50
   2  -8  -2   62.39    7.90
   2  -8  -2   39.80    7.80
   2  -8  -2   28.40    6.90
  -2  -8   2   40.20    7.00
  -2  -8   2   33.30    6.40
   2   8  -1  127.99   12.20
  -2   8   1  115.09   11.80
  -2   8   1  124.39   10.70
   2   8  -1  128.29    9.80
  -2  -8   1  109.59   11.10
  -2  -8   1  105.29   11.20
   2  -8  -1  128.69   12.30
   2  -8  -1  135.79   12.60
  -2   8   0   10.50    4.40
  -2   8   0   13.20    5.50
   2   8   0   15.20    6.90
  -2   8   0   17.40    6.20
   2   8   0   15.00    4.10
   2  -8   0   11.30    4.70
  -2  -8   0   13.80    4.50
  -2  -8   0    3.60    5.00
   2  -8   0   11.60    5.40
  -2  -8   0    0.30    4.90
   2   8   1   -0.10    3.60
  -2   8  -1   -2.50    3.90
  -2   8  -1   -5.40    3.30
  -2   8  -1    0.90    5.60
   2  -8   1   -3.90    3.50
  -2  -8  -1    2.30    3.70
  -2  -8  -1   -7.10    4.40
  -2  -8  -1   -6.10    4.20
   2  -8   1   -5.90    4.20
  -2   8  -2   41.00    7.00
   2   8   2   35.00    5.80
  -2   8  -2   59.49   12.10
  -2   8  -2   24.80    4.90
   2   8   2   39.80    8.70
  -2  -8  -2   31.20    6.90
  -2  -8  -2   51.09    7.50
   2  -8   2   33.10    6.40
  -2  -8  -2   28.30    5.90
   2  -8   2   34.70    6.70
  -2   8  -3   31.00    8.60
   2   8   3   22.20    5.00
  -2   8  -3   24.00    5.80
   2   8   3   23.90    7.70
  -2  -8  -3   35.90    6.30
   2  -8   3   21.20    5.50
  -2  -8  -3   25.70    7.00
  -2  -8  -3   21.40    5.70
   2  -8   3   27.90    6.00
   2   8   4  204.38   17.60
  -2   8  -4  238.68   23.30
   2   8   4  240.18   15.50
  -2   8  -4  218.18   14.90
   2  -8   4  253.77   22.20
  -2  -8  -4  254.37   18.70
  -2  -8  -4  229.08   15.90
  -2  -8  -4  249.58   15.30
   2  -8   4  238.78   14.80
   2   8   5   -8.50    5.50
  -2   8  -5   -0.60    4.60
  -2   8  -5  -13.40    8.40
   2   8   5   10.30    4.80
   2  -8   5    3.70    4.90
  -2  -8  -5   -4.60    4.50
   2  -8   5    2.90    4.00
  -2  -8  -5   13.50    6.40
   2  -8   5   -7.20    5.90
  -2   8  -6  177.08   18.30
   2   8   6  179.28   17.50
   2   8   6  231.78   18.50
  -2  -8  -6  214.98   16.50
   2  -8   6  215.08   16.10
  -2  -8  -6  217.78   19.30
   2  -8   6  162.58   16.20
   2  -8   6  225.48   14.00
   2   8   7    3.00    6.30
   2   8   7   -5.00    5.00
  -2   8  -7   -3.20    5.20
  -2  -8  -7   -6.50    6.40
   2  -8   7    8.10    5.70
  -2  -8  -7    1.00    7.10
   2  -8   7   -5.50    6.10
   2  -8   7   -3.30    4.70
   2   8   8   30.10    9.60
   2   8   8   30.30    7.10
  -2   8  -8   30.90    7.50
  -2  -8  -8   28.20   10.60
   2  -8   8   34.50    8.50
  -2  -8  -8   34.10    9.30
   2  -8   8   37.80   12.40
   2   8   9   59.19   11.80
  -2   8  -9   87.19   13.40
   2  -8   9   78.09   11.10
  -2  -8  -9   71.99   11.70
  -2  -8  -9   62.09   12.90
  -2   8 -10   13.40    6.70
   2   8  10   -2.30    8.40
  -2  -8 -10   -2.00    7.90
  -2  -8 -10    5.70    8.30
   2  -8  10    0.10    5.20
  -2   8 -11    2.30    5.60
  -2  -8 -11   -7.00    8.20
   2  -8  11   -7.40    4.80
  -2  -8 -11  -12.60    8.10
   2   8  12   92.79   19.00
  -2   8 -12  115.69   15.30
  -2  -8 -12  120.19   18.80
  -2  -8 -12   72.39   14.70
   2  -8  12  119.89   12.50
   2   8  13  110.99   22.80
  -2   8 -13  121.09   15.90
  -2  -8 -13   81.89   16.30
   2  -8  13  144.99   20.60
  -2  -8 -13  105.19   17.80
  -2   8 -14   26.60    9.00
   2   8  14  -14.10   14.20
   2  -8  14   16.10    6.80
  -2  -8 -14    2.30   10.00
  -2  -8 -14   -4.20   10.80
  -2   8 -15   81.89   13.00
   2  -8  15   89.89   14.50
  -2  -8 -15   76.19   15.90
  -2   8 -16   29.40   10.10
   2   8  16  -24.50   14.30
   2  -8  16    5.70    7.60
  -2  -8 -16    8.40   13.20
  -2   9  16   35.80   11.80
   2   9 -16   37.80   11.30
   2  -9 -16   47.50   14.60
   2  -9 -16   22.50   13.70
  -2   9  15   20.60   14.30
   2   9 -15   15.20   16.70
   2  -9 -15   17.70   12.10
   2  -9 -15    3.80   10.30
  -2  -9  15   12.30    7.70
  -2   9  14    6.20   13.60
   2   9 -14   16.10    9.50
   2  -9 -14   23.30   11.50
   2  -9 -14   22.40   12.00
  -2   9  13   -6.90   10.10
   2   9 -13   16.30    8.10
   2  -9 -13   -1.30    9.70
   2  -9 -13   -0.90    8.70
   2   9 -12    5.30    6.70
   2  -9 -12   -8.10    8.50
   2  -9 -12   -3.20    9.30
  -2   9  11  106.69   16.30
   2   9 -11  167.48   16.90
  -2  -9  11  149.79   11.70
   2  -9 -11  142.59   19.50
  -2   9  10   34.30    9.40
   2   9 -10   46.90    9.30
   2  -9 -10   38.50   11.90
  -2  -9  10   45.10   11.20
  -2  -9  10   41.40    6.70
   2  -9 -10   51.29   11.30
  -2   9   9   43.80    9.70
  -2  -9   9   73.79    9.40
   2  -9  -9   30.40   10.10
  -2  -9   9   52.59   11.30
   2  -9  -9   48.70   10.90
  -2   9   8  112.29   14.50
   2   9  -8  102.59   14.20
   2  -9  -8   66.59   13.70
   2  -9  -8   99.69   14.80
  -2  -9   8   95.19   18.30
  -2  -9   8  112.39   11.00
   2   9  -7   53.79    9.30
  -2  -9   7   46.10    9.30
   2  -9  -7   28.70   10.60
  -2  -9   7   75.59    9.40
   2  -9  -7   47.70   10.00
  -2   9   6    5.10    6.80
   2   9  -6   13.80    6.60
  -2  -9   6    5.90    6.10
   2  -9  -6    7.70    6.80
   2  -9  -6   -4.20    7.20
  -2  -9   6   17.80    4.90
   2   9  -5  189.18   13.50
   2   9  -5  211.98   16.20
  -2   9   5  220.88   19.30
   2  -9  -5  236.58   26.50
  -2  -9   5  265.37   15.70
  -2  -9   5  226.68   15.90
   2  -9  -5  215.38   20.40
   2   9  -4   20.80    4.90
  -2   9   4   11.60    7.70
   2   9  -4   21.50    6.70
  -2  -9   4   31.20    6.10
   2  -9  -4   29.80    7.60
   2  -9  -4   18.90    8.00
  -2   9   3  145.49   13.70
   2   9  -3  169.98   12.00
   2   9  -3  171.08   14.70
  -2   9   3  135.69   15.60
   2  -9  -3  192.08   14.20
  -2  -9   3  189.98   14.50
  -2  -9   3  172.58   16.30
   2  -9  -3  159.78   13.50
   2  -9  -3  137.49   16.70
   2   9  -2   34.70    7.00
   2   9  -2   35.50    6.00
  -2   9   2   27.50    6.60
  -2   9   2   28.30    7.70
  -2  -9   2   33.30    7.60
   2  -9  -2   39.10    6.60
   2  -9  -2   25.40    6.10
   2  -9  -2   16.20    7.80
  -2  -9   2   30.70    6.90
  -2   9   1   -3.10    4.30
   2   9  -1    2.10    4.80
   2   9  -1   -3.60    4.00
  -2   9   1   -8.70    5.80
  -2   9   1   -5.10    5.10
   2  -9  -1   -3.30    4.20
  -2  -9   1   -9.20    4.60
  -2  -9   1   -6.80    4.90
   2   9   0   33.00    6.70
  -2   9   0   40.30   10.00
  -2   9   0   26.40    6.60
  -2   9   0   34.30    7.40
  -2  -9   0   20.20    6.20
  -2  -9   0   22.00    6.90
   2  -9   0   40.10    8.10
   2  -9   0   31.10    6.40
  -2  -9   0   36.30    7.30
  -2   9  -1  400.76   27.70
   2   9   1  421.76   23.50
  -2   9  -1  427.26   23.20
   2   9   1  417.36   22.40
   2  -9   1  455.55   23.20
  -2  -9  -1  387.56   24.20
  -2  -9  -1  422.96   31.70
  -2  -9  -1  415.86   20.60
   2  -9   1  439.76   22.60
   2   9   2  212.28   17.60
  -2   9  -2  228.48   16.10
  -2   9  -2  221.78   15.40
  -2   9  -2  259.77   21.80
   2   9   2  235.18   15.90
  -2  -9  -2  216.78   19.60
   2  -9   2  253.57   17.00
  -2  -9  -2  201.38   15.00
   2  -9   2  223.38   16.20
  -2   9  -3  176.78   14.30
  -2   9  -3  170.58   13.50
  -2   9  -3  218.08   20.90
   2   9   3  182.28   17.00
   2   9   3  171.38   14.40
   2  -9   3  182.58   14.80
  -2  -9  -3  175.88   14.10
   2  -9   3  200.38   15.10
  -2  -9  -3  147.49   17.40
  -2   9  -4    5.40    5.60
   2   9   4   -6.60    5.60
   2  -9   4    6.00    5.60
   2  -9   4   13.70    5.60
  -2  -9  -4    4.00    5.80
  -2  -9  -4    0.80    6.80
   2   9   5  -10.90    6.00
  -2  -9  -5   -1.80    5.40
   2  -9   5   -9.30    5.10
   2  -9   5   -4.50    4.30
  -2  -9  -5   -4.00    5.90
   2   9   6   68.69   11.80
   2   9   6  112.39   16.60
  -2   9  -6   98.99   13.20
  -2  -9  -6   97.49   14.30
   2  -9   6  106.89   15.00
   2  -9   6   94.69   12.30
  -2  -9  -6   86.09   13.50
   2  -9   6   92.49   15.00
  -2   9  -7  459.75   24.80
   2   9   7  485.35   30.60
   2  -9   7  485.15   33.30
  -2  -9  -7  504.75   27.90
   2  -9   7  506.45   24.30
  -2  -9  -7  424.56   30.30
   2   9   8  282.07   23.80
  -2   9  -8  258.67   18.80
   2  -9   8  263.07   17.60
  -2  -9  -8  258.77   22.00
  -2  -9  -8  244.98   25.00
  -2   9  -9  333.77   21.20
   2   9   9  293.87   30.30
  -2  -9  -9  271.67   24.30
  -2  -9  -9  292.17   27.40
   2  -9   9  327.37   19.60
  -2   9 -10   60.39    9.90
   2   9  10   49.50   14.20
  -2  -9 -10   42.60   12.20
  -2  -9 -10   50.69   12.60
   2  -9  10   43.60    7.80
  -2   9 -11   -5.90    6.60
  -2  -9 -11  -16.90    7.50
   2  -9  11   -4.60    5.10
   2   9  12   -1.50    9.90
  -2   9 -12   -6.40    7.10
  -2  -9 -12  -11.10    9.60
   2  -9  12   -1.40    8.30
  -2  -9 -12   -2.90    7.40
  -2   9 -13   13.40    7.70
   2   9  13   -4.80   11.90
  -2  -9 -13   13.90   10.30
   2  -9  13    4.20    6.60
  -2  -9 -13    7.00   10.90
  -2   9 -14   17.00    9.30
   2   9  14    1.90   15.40
   2  -9  14   12.60    7.60
  -2  -9 -14   17.00   12.00
  -2  -9 -14   22.40   16.30
  -2   9 -15   18.00    8.70
  -2  -9 -15   -1.50   10.60
  -2  -9 -15   -1.80   10.80
   2  -9  15    8.20    7.20
  -2  10  15   -4.90   14.90
   2  10 -15   23.90   10.70
   2 -10 -15   32.70   14.60
   2 -10 -15   23.50   12.20
   2  10 -14   73.99   16.10
   2 -10 -14   37.70   12.50
   2 -10 -14   38.10   14.20
   2  10 -13   -4.10    8.20
   2 -10 -13   -2.70   10.10
   2 -10 -13  -10.90   10.20
   2  10 -12   -2.30    7.60
  -2  10  12   -8.00    8.10
   2 -10 -12   10.60   10.20
  -2 -10  12    4.40    5.10
  -2  10  11   77.29   15.10
   2  10 -11  102.49   15.40
  -2 -10  11  101.49   10.80
   2 -10 -11   56.39   12.90
   2 -10 -11   71.49   14.50
   2  10 -10   30.80    8.20
  -2 -10  10   17.30    5.70
   2 -10 -10    0.20    9.20
   2 -10 -10   10.90    9.30
   2  10  -9  218.08   18.40
  -2  10   9  184.98   19.60
   2 -10  -9  167.08   21.80
   2 -10  -9  230.58   22.30
  -2 -10   9  221.28   15.70
  -2 -10   9  213.68   20.50
  -2  10   8  535.35   29.90
   2  10  -8  495.55   27.50
   2 -10  -8  532.65   30.20
  -2 -10   8  467.75   29.10
   2 -10  -8  429.36   31.10
  -2 -10   8  510.45   24.80
   2  10  -7   28.60    8.50
   2 -10  -7   20.40    9.70
   2 -10  -7   24.70    8.50
  -2 -10   7   15.50    6.90
   2  10  -6  777.12   35.70
  -2  10   6  699.73   38.80
   2 -10  -6  857.41   38.20
  -2 -10   6  836.52   34.80
  -2 -10   6  800.52   36.60
   2 -10  -6  822.62   41.70
   2  10  -5   20.20    7.20
   2  10  -5    3.70    5.30
  -2  10   5    2.70    8.10
  -2 -10   5   17.00    7.20
  -2 -10   5   13.20    6.80
   2 -10  -5   12.40    7.60
   2 -10  -5    6.30    8.60
   2  10  -4   -3.20    4.40
  -2  10   4  -14.50    7.10
   2  10  -4    6.80    6.30
   2 -10  -4    0.60    7.10
  -2 -10   4   -1.20    6.10
   2 -10  -4  -10.70    6.20
  -2  10   3   41.30   10.40
   2  10  -3   31.20    6.50
  -2 -10   3   50.19    8.80
   2 -10  -3   37.60   10.20
   2 -10  -3   46.70   13.30
  -2  10   2  739.13   36.10
   2  10  -2  747.23   34.70
   2  10  -2  723.33   35.50
   2 -10  -2  813.12   38.30
  -2 -10   2  755.02   35.50
   2 -10  -2  835.92   35.40
   2  10  -1  160.08   14.20
  -2  10   1  196.48   17.70
   2  10  -1  177.38   16.80
  -2  10   1  155.58   16.30
  -2  10   1  187.28   20.50
   2 -10  -1  186.08   18.30
  -2 -10   1  181.38   18.10
  -2  10   0  908.11   46.60
   2  10   0  947.41   41.10
   2  10   0  932.51   38.90
  -2  10   0  909.91   40.30
  -2  10   0  943.11   39.80
  -2 -10   0  925.41   37.30
  -2 -10   0  944.51   42.90
   2 -10   0 1030.30   42.30
   2  10   1   28.90    7.80
   2  10   1   47.50    9.20
  -2  10  -1   31.20    7.30
  -2 -10  -1   39.30    9.90
  -2 -10  -1   27.70    8.40
  -2  10  -2  158.78   15.10
   2  10   2  180.98   17.70
  -2  10  -2  195.78   16.60
  -2 -10  -2  176.68   15.90
   2 -10   2  201.58   18.20
  -2 -10  -2  204.08   20.00
  -2  10  -3   21.90    7.20
  -2  10  -3    4.00    5.70
   2  10   3   17.20    8.00
  -2 -10  -3    3.70    7.50
  -2 -10  -3    9.00    8.00
  -2  10  -4 1121.49   45.60
  -2 -10  -4 1154.18   47.00
  -2 -10  -4 1137.79   52.59
   2 -10   4 1223.38   51.89
   2  10   5  135.89   17.60
  -2  10  -5  148.39   15.50
   2 -10   5  119.89   16.20
  -2 -10  -5  126.89   16.50
  -2 -10  -5  134.19   18.10
   2 -10   5  119.69   16.40
   2  10   6  329.57   24.80
   2  10   6  332.87   27.50
  -2  10  -6  345.07   21.20
  -2 -10  -6  314.47   23.60
  -2 -10  -6  298.77   25.70
   2 -10   6  353.76   21.50
   2  10   7  109.59   18.90
  -2  10  -7  151.88   15.40
  -2 -10  -7  107.39   17.00
  -2 -10  -7   74.59   13.90
   2 -10   7  127.89   14.90
  -2  10  -8   35.20    8.50
   2  10   8   22.50   10.40
   2 -10   8   27.10    7.60
  -2 -10  -8   33.30   10.40
  -2 -10  -8   30.00   11.30
  -2  10  -9   15.60    7.30
   2  10   9    9.90    9.80
  -2 -10  -9   10.00    9.20
   2 -10   9   24.60    8.60
  -2 -10  -9   11.20    9.00
  -2  10 -10   16.70    8.30
   2  10  10    8.00    8.80
  -2 -10 -10   17.60    9.50
  -2 -10 -10   27.00   10.20
  -2  10 -11   -4.90    6.40
   2  10  11   -2.30    8.80
   2 -10  11   -8.90    6.30
  -2 -10 -11   -4.90    9.10
  -2 -10 -11  -14.80   11.70
  -2  10 -12   14.40    8.50
   2  10  12   11.90   10.80
   2 -10  12    7.30    6.60
  -2 -10 -12   16.10   10.30
  -2 -10 -12   13.20    9.70
   2  10  13   48.80   15.30
  -2  10 -13   46.70   11.50
  -2 -10 -13   60.39   15.40
  -2 -10 -13   47.40   14.30
   2 -10  13   40.30    9.10
   2  10  14  -16.70   14.20
  -2  10 -14    0.80    9.00
   2 -10  14    3.10    7.50
  -2 -10 -14   -5.50    9.80
  -2 -10 -14   -8.40   10.90
  -2  11  14  284.87   31.40
   2  11 -14  344.87   26.60
   2 -11 -14  352.66   31.50
   2 -11 -14  292.37   32.30
  -2  11  13   21.60   12.30
   2  11 -13   49.50   11.90
   2 -11 -13   45.50   14.60
   2 -11 -13   41.30   15.00
  -2  11  12   77.49   16.50
   2  11 -12   68.19   14.60
  -2 -11  12   97.39   13.20
   2 -11 -12   88.59   16.30
   2  11 -11   -5.90    8.00
   2 -11 -11  -13.50    9.10
   2 -11 -11   -6.00    8.70
  -2 -11  11   -7.00    5.30
  -2  11  10   40.70   11.10
   2  11 -10   33.10    9.30
   2 -11 -10   20.70   11.80
   2 -11 -10   43.10   11.30
  -2 -11  10   35.60    6.60
   2  11  -9    7.10    7.10
  -2  11   9    1.70    8.90
   2 -11  -9   -3.40    9.00
  -2 -11   9    1.60    6.00
   2 -11  -9    4.80    9.60
   2  11  -8  519.85   28.90
  -2  11   8  499.65   31.00
  -2 -11   8  510.05   27.40
   2 -11  -8  495.05   34.50
  -2 -11   8  447.06   29.60
   2 -11  -8  539.75   31.60
  -2 -11   7   12.60    9.20
   2 -11  -7   28.10   10.60
  -2 -11   7   34.60    8.30
   2 -11  -7   24.60    9.30
  -2  11   6  277.27   24.10
   2  11  -6  306.37   20.80
   2 -11  -6  303.27   22.60
   2 -11  -6  296.57   26.20
  -2 -11   6  298.57   21.80
  -2 -11   6  271.77   24.50
  -2  11   5   40.50   10.80
   2  11  -5   20.80    7.30
   2 -11  -5   38.90   11.30
  -2 -11   5   40.30   10.60
   2 -11  -5   35.20   10.10
  -2 -11   5   35.90    9.70
  -2  11   4   -6.30    8.60
   2  11  -4   -4.20    6.10
   2 -11  -4  -16.20    7.30
  -2 -11   4  -12.00    7.00
   2 -11  -4   -3.00    6.80
   2  11  -3   54.59    9.70
   2  11  -3   44.10    8.00
  -2  11   3   51.59   10.80
   2 -11  -3   49.99   11.10
   2 -11  -3   87.49   14.00
  -2  11   2  141.79   18.10
   2  11  -2  105.89   13.90
  -2  11   2  155.28   21.20
   2  11  -2  156.68   16.80
   2 -11  -2  157.58   15.60
   2 -11  -2  119.69   19.00
  -2  11   1   42.70   11.90
   2  11  -1   34.50    8.60
  -2  11   1   30.50    8.60
  -2 -11   1   22.40    7.50
  -2 -11   1    6.50    9.00
  -2 -11   0   63.09   12.70
   2  11   1   29.60    9.60
  -2  11  -1   19.60    8.20
  -2 -11  -1    9.90    8.20
   2 -11   1   24.50    8.90
  -2 -11  -1   23.30    9.60
   2  11   2   -4.60    6.90
  -2  11  -2    1.70    6.90
   2 -11   2   -4.40    7.50
  -2 -11  -2   -1.70    8.30
  -2  11  -3   53.59   10.00
  -2  11  -3   33.90    8.50
   2  11   3   48.20   11.40
  -2 -11  -3   39.50    9.70
   2 -11   3   45.60   10.60
  -2 -11  -3   43.40   12.10
  -2  11  -4  184.98   17.00
   2  11   4  126.19   18.50
  -2 -11  -4  142.69   19.70
   2 -11   4  142.49   18.60
   2  11   5   31.10   10.10
   2 -11   5   21.00    9.00
  -2 -11  -5   38.20    9.60
  -2 -11  -5   20.90    9.40
   2  11   6  245.68   24.00
  -2  11  -6  260.97   19.40
   2  11   6  230.48   23.00
   2 -11   6  225.08   19.50
  -2 -11  -6  205.08   23.20
  -2 -11  -6  248.88   20.90
   2  11   7   56.59   12.80
  -2  11  -7   67.59   11.00
   2  11   7   90.69   19.10
  -2 -11  -7   59.59   13.70
  -2 -11  -7   77.29   13.50
   2 -11   7   99.19   14.70
  -2  11  -8   43.40    9.60
   2  11   8   29.30   10.90
   2 -11   8   38.90    8.40
  -2 -11  -8   15.90   10.70
  -2 -11  -8   38.00   10.60
  -2  11  -9   -5.40    6.30
   2  11   9    0.20    8.70
  -2 -11  -9  -11.10    9.30
   2 -11   9    5.80    7.00
  -2  11 -10   16.20    7.70
   2  11  10   11.60   10.40
  -2 -11 -10   19.10   13.10
   2 -11  10   27.90    8.20
  -2 -11 -10   21.40    9.60
   2  11  11   18.70   11.40
  -2  11 -11    8.00    8.70
  -2 -11 -11   -4.40    9.80
  -2 -11 -11   24.40   12.10
   2 -11  11    0.20    7.20
  -2  11 -12  123.99   18.70
   2  11  12  164.78   21.90
  -2 -11 -12  156.28   25.30
  -2 -11 -12  141.79   23.10
   2 -11  12  160.68   17.70
  -2  11 -13    1.50   13.40
   2  11  13   -7.80   11.90
  -2 -11 -13   18.20   11.60
   2 -11  13   -5.00    7.00
  -2 -11 -13   23.70   14.00
  -2  12  13   -8.60   10.90
   2  12 -13  -14.30    8.90
  -2 -12  13   -0.70    7.30
   2 -12 -13  -13.00   10.20
   2 -12 -13    3.10   11.30
   2  12 -12    5.00    9.20
  -2  12  12    2.60    9.10
   2 -12 -12   14.90   12.90
  -2 -12  12    0.80    7.40
   2 -12 -12   19.20   13.30
  -2  12  11   40.70   11.40
   2  12 -11   23.60   10.70
  -2 -12  11   27.30    8.60
   2 -12 -11   31.10   12.40
   2 -12 -11   21.60   10.90
   2  12 -10   39.10   13.60
  -2  12  10   56.69   12.20
  -2 -12  10   39.30    9.20
   2 -12 -10   60.09   13.60
   2 -12 -10   41.50   12.90
   2  12  -9   17.20    9.20
  -2  12   9   12.60   11.10
  -2 -12   9    3.60    7.00
   2 -12  -9   -2.60   11.10
   2 -12  -9   -7.00    8.40
   2  12  -8  105.39   15.80
   2 -12  -8  138.19   18.40
  -2 -12   8  127.09   15.70
   2 -12  -8   80.39   15.30
   2  12  -7   15.10    8.40
   2 -12  -7   23.20    9.10
  -2 -12   7   11.70    8.70
   2 -12  -7   -2.40   10.00
  -2 -12   7   25.00   11.20
   2  12  -6   54.89   10.20
  -2  12   6   43.60   11.70
   2 -12  -6   53.69   11.00
  -2 -12   6   60.59   11.40
   2 -12  -6   26.80   12.00
   2  12  -5   42.00   10.00
  -2  12   5   29.40   10.00
   2 -12  -5   13.00   12.70
   2 -12  -5   47.10   10.20
  -2 -12   5   12.20    9.10
  -2 -12   5   25.10    9.20
  -2  12   4    2.70    8.10
   2  12  -4   -0.40    6.90
  -2 -12   4   -6.60    7.70
   2 -12  -4   -1.30    7.60
  -2  12   3   -4.60    7.30
   2  12  -3    1.30    6.90
  -2 -12   3  -15.80    7.60
   2 -12  -3  -13.70    8.30
   2 -12  -3   -1.30    7.30
   2  12  -2  245.38   20.70
  -2  12   2  241.88   22.70
  -2 -12   2  227.08   23.20
   2 -12  -2  293.27   20.70
   2 -12  -2  250.17   24.80
   2  12  -1   32.10    9.40
  -2  12   1   23.60    9.10
   2 -12  -1   35.60    8.90
   2 -12  -1   19.10   10.00
  -2 -12   1    8.90    8.80
   2  12   0   44.60   10.70
  -2  12   0   52.69   10.30
  -2 -12   0   35.30   10.20
  -2 -12   0   32.10   11.00
   2 -12   0   42.20   11.60
   2  12   1   21.70    9.40
  -2  12  -1   24.60    8.70
  -2 -12  -1    1.30    8.50
  -2 -12  -1    8.00   10.20
   2 -12   1   12.80    8.70
   2  12   2  106.19   17.60
  -2  12  -2  126.09   16.50
   2 -12   2  126.29   17.80
  -2 -12  -2   78.09   15.00
  -2 -12  -2   73.89   16.10
   2  12   3   -2.30    7.60
  -2  12  -3    5.10    7.60
  -2 -12  -3    2.40    7.50
  -2 -12  -3   -3.80    8.20
   2 -12   3    5.20    8.20
   2  12   4   14.30    8.70
  -2  12  -4   38.10    9.30
   2 -12   4   36.10    9.90
  -2 -12  -4   16.20    9.60
  -2 -12  -4   30.90    9.60
  -2  12  -5   33.00    9.20
   2  12   5   18.50   11.10
   2 -12   5   30.40    9.50
  -2 -12  -5   37.90   10.20
  -2 -12  -5   24.00   10.90
   2  12   6  218.08   24.20
  -2  12  -6  188.08   18.40
   2  12   6  178.18   22.00
  -2 -12  -6  218.18   26.10
   2 -12   6  226.38   20.00
  -2 -12  -6  235.28   21.60
   2  12   7   29.10   13.60
  -2  12  -7   44.50    9.90
   2  12   7   44.50   12.10
   2 -12   7   24.30    8.80
  -2 -12  -7   32.90   10.60
  -2 -12  -7   35.10   12.00
   2  12   8  144.49   21.40
  -2  12  -8  116.59   16.90
   2 -12   8  118.89   17.30
  -2 -12  -8  159.28   20.00
   2  12   9   97.59   20.00
  -2  12  -9   71.29   11.70
   2 -12   9   56.79   11.00
  -2 -12  -9   51.59   14.10
  -2 -12  -9   68.29   14.10
   2  12  10    1.90   10.60
  -2  12 -10  -15.30    7.30
  -2 -12 -10   -6.70   10.30
   2 -12  10  -11.60    7.40
  -2 -12 -10    3.50   10.30
  -2  12 -11   -9.80    8.60
  -2 -12 -11   -5.60   10.80
  -2 -12 -11  -20.50    9.20
   2 -12  12   -5.10    7.50
  -2 -12 -12    5.30   11.60
   2  13 -11  -13.40    8.60
  -2  13  11   -4.00    9.60
  -2 -13  11  -11.50    8.10
   2 -13 -11   -8.90   11.20
   2 -13 -11   10.50   12.70
   2  13 -10   -4.30    8.40
  -2  13  10    7.90   10.10
  -2 -13  10    0.60    8.40
   2 -13 -10    3.80   10.40
   2 -13 -10   -0.20   11.20
  -2  13   9   -3.70    9.50
   2  13  -9  -14.90    7.40
   2 -13  -9  -17.90    9.90
   2 -13  -9  -10.20   10.50
  -2  13   8   -4.50    9.40
   2  13  -8   -1.20    8.60
   2 -13  -8   12.70    9.70
  -2 -13   8  -14.20    7.70
   2  13  -7  -14.10   11.90
   2 -13  -7   -4.00    8.30
  -2  13   6    4.40   11.00
   2  13  -6   11.10    8.60
   2 -13  -6   14.90    8.70
  -2 -13   6    5.20    8.90
   2 -13  -6   -0.70   12.90
  -2  13   5   38.70   12.50
   2  13  -5   32.00    9.90
  -2 -13   5   43.80   11.10
   2 -13  -5   12.50    8.90
   2 -13  -5   43.70   13.00
  -2 -13   5   14.10   11.50
   2  13  -4   27.60    9.40
  -2  13   4    7.70    9.80
   2 -13  -4   47.30   11.20
   2 -13  -4   12.60   11.10
  -2 -13   4   17.90    9.80
  -2  13   3   21.60    9.30
   2  13  -3   12.20    8.90
  -2 -13   3   19.90   10.20
   2 -13  -3   17.90    9.80
   2 -13  -3    6.20   10.10
  -2  13   2    1.90    8.70
   2  13  -2    8.40    8.50
   2 -13  -2   11.40    9.20
  -2 -13   2   -5.00    9.60
  -2 -13   2   -7.30    8.40
   2 -13  -2   -0.20    8.50
   2  13  -1  100.19   16.90
  -2  13   1  114.29   18.50
   2 -13  -1  122.59   16.20
   2 -13  -1   93.79   15.60
  -2 -13   1   90.69   14.40
  -2 -13   1   77.59   13.90
  -2  13   0   20.50    9.50
   2  13   0   28.80    9.90
  -2 -13   0   15.80    9.00
   2 -13   0   18.90    9.00
  -2 -13   0   30.20   11.60
   2 -13   0   18.10   10.50
  -2  13  -1    9.20    8.50
   2  13   1    9.80    9.20
  -2 -13  -1   -7.50    8.10
  -2 -13  -1   -7.50    7.20
   2 -13   1    3.90    7.90
   2  13   2   16.90   10.50
  -2  13  -2   31.30    9.90
  -2 -13  -2   26.60    9.10
   2 -13   2   30.80   10.30
  -2 -13  -2   27.70   10.10
  -2  13  -3   27.30    9.80
   2  13   3   49.20   13.20
  -2 -13  -3   43.40    9.80
   2 -13   3   33.60   11.10
  -2 -13  -3   46.80   12.90
  -2  13  -4    5.10    8.30
   2  13   4  -13.50   12.30
  -2 -13  -4    7.40    7.90
  -2 -13  -4   -6.30    8.50
   2 -13   4  -12.30    8.00
  -2  13  -5   10.00    8.20
   2  13   5   25.80   11.40
   2 -13   5   15.70    9.20
  -2 -13  -5   21.20   11.20
  -2 -13  -5   27.90   10.20
  -2  13  -6   -2.80    7.70
   2  13   6   -6.90    8.40
   2  13   6    4.00    9.90
   2 -13   6   16.40    9.80
  -2 -13  -6   -2.00    9.50
   2  13   7   47.40   13.40
   2  13   7   65.29   15.70
  -2  13  -7   46.20   11.40
   2 -13   7   64.09   12.20
  -2 -13  -7   62.39   15.60
  -2 -13  -7   69.09   13.80
   2  13   8   10.90   12.00
  -2  13  -8   -2.10    8.80
  -2 -13  -8    7.40   10.60
  -2 -13  -8   -3.30   10.70
   2 -13   8   -4.70    8.50
  -2  13  -9   34.50   17.80
   2  13   9   47.20   14.00
  -2 -13  -9   33.30   12.60
  -2 -13  -9   16.20   13.90
   2 -13   9   18.80    9.60
  -2  13 -10   -1.30    9.10
   2  13  10   10.00   10.50
  -2 -13 -10  -19.00   11.00
   2 -13  10   -9.40    8.60
  -2 -13 -10   -7.40    9.90
  -2 -14   9   11.40   10.00
   2 -14  -9    1.50   10.80
  -2  14   8   29.00   13.10
   2  14  -8   14.50   10.40
   2 -14  -8   14.90   13.20
  -2 -14   8   27.20   11.80
   2 -14  -8   10.90   11.80
   2  14  -7    3.80    9.60
   2 -14  -7    9.30   10.80
  -2 -14   7    1.90    9.60
   2 -14  -7    2.90   12.20
   2  14  -6   25.60   10.20
  -2  14   6   20.20   11.30
  -2 -14   6   11.80   10.30
   2 -14  -6    8.60   13.20
   2 -14  -6   33.10   11.50
   2  14  -5    2.60    8.70
  -2  14   5    0.70    9.70
   2 -14  -5  -20.40   10.50
   2 -14  -5  -16.50    7.90
  -2 -14   5   -6.40   10.40
   2  14  -4   -2.70    9.10
  -2  14   4  -12.60    9.60
   2 -14  -4  -11.90    8.60
  -2  14   3   -1.30    9.30
   2  14  -3   16.40    9.50
   2 -14  -3    9.10   12.60
   2 -14  -3   20.20    9.50
  -2 -14   3    0.60   10.50
  -2 -14   3   -6.80    8.50
  -2  14   2   64.79   13.70
   2  14  -2   62.29   12.50
   2 -14  -2  104.79   16.70
  -2 -14   2  100.69   15.80
  -2 -14   2   69.39   15.00
   2 -14  -2   56.09   14.10
   2  14  -1   49.40   12.70
  -2  14   1   31.70   13.90
  -2 -14   1   29.80   12.20
   2 -14  -1   37.30   12.20
  -2 -14   1   32.50   10.10
   2 -14  -1   52.89   10.80
   2  14   0   68.69   13.30
  -2 -14   0   55.79   11.70
   2 -14   0   44.50   12.70
  -2 -14   0   53.59   13.60
   2 -14   0   53.39   10.70
   2  14   1    4.90    9.90
  -2  14  -1    8.60   10.70
  -2 -14  -1  -15.60    8.60
   2 -14   1   -4.10   10.30
  -2 -14  -1   -7.30   10.20
   2  14   2  152.98   22.10
  -2  14  -2  125.79   23.00
   2 -14   2   88.89   15.00
  -2 -14  -2  143.29   18.10
  -2 -14  -2   92.09   16.50
   2  14   3   14.30   10.40
  -2  14  -3   19.30   16.10
   2 -14   3   26.30   12.50
  -2 -14  -3   28.80   10.10
  -2 -14  -3   28.00   13.00
   2  14   4   27.20   11.90
  -2 -14  -4   43.10   12.00
   2 -14   4   17.10   11.00
   2  14   5   61.39   15.20
  -2  14  -5   64.49   16.90
   2 -14   5   71.69   13.60
  -2 -14  -5   75.59   15.20
  -2 -14  -5   71.99   16.30
  -2  14  -6   19.50   10.90
   2  14   6   39.70   13.90
   2  14   6    2.10   10.80
   2 -14   6    3.80   10.10
  -2 -14  -6    9.10   12.20
  -2 -14  -6   23.00   13.50
   2  14   7   -2.70   10.80
   2  14   7   30.70   13.80
  -2  14  -7    7.40    9.70
   2 -14   7   14.80   10.10
  -2 -14  -7   14.00   12.80
  -2 -14  -7   24.00   13.00
  -2  15   5   77.59   16.40
   2  15  -5   72.09   14.10
   2 -15  -5   78.99   15.30
   2 -15  -5   48.80   16.80
  -2 -15   5   65.49   14.40
  -2  15   4   14.40   12.80
   2  15  -4   13.80   10.90
   2 -15  -4    2.90   12.40
   2 -15  -4    9.70   10.80
  -2 -15   4   -3.10   10.90
   2  15  -3   41.10   12.50
  -2  15   3   52.59   13.90
  -2 -15   3   47.90   14.80
   2 -15  -3   35.70   14.50
   2 -15  -3   55.39   13.70
  -2 -15   3   40.70   11.30
  -2  15   2   -6.80    9.10
   2  15  -2   18.10   11.10
  -2 -15   2    4.30   12.40
   2 -15  -2  -11.40   10.60
   2 -15  -2    6.60   12.50
  -2 -15   2   13.40   10.50
   2  15  -1   42.50   12.80
  -2  15   1   30.30   12.50
  -2 -15   1   30.70   12.30
  -2 -15   1   29.10   10.90
   2 -15  -1   14.40   12.20
   2 -15  -1    8.80   16.00
   2  15   0   25.80   12.70
  -2  15   0    2.80   10.00
   2 -15   0    1.60   12.10
  -2 -15   0    6.30   10.40
   2 -15   0   -2.80   10.60
  -2 -15   0    8.50   11.80
   2  15   1    4.80   11.30
  -2  15  -1    9.10   10.90
   2 -15   1    6.90   12.20
  -2 -15  -1   -1.70   13.00
  -2 -15  -1    3.80   10.60
   2 -15   1    4.30   11.20
   2  15   2   15.00   12.90
  -2  15  -2   20.40   11.10
  -2 -15  -2   -1.10   12.70
  -2 -15  -2   11.80   11.10
   2 -15   2   11.30   11.50
   2  15   3  164.88   25.80
  -2  15  -3  146.49   20.70
  -2 -15  -3  161.18   27.00
  -2 -15  -3  161.58   22.80
   2 -15   3  186.38   26.20
   2  15   4   30.20   12.70
  -2  15  -4   31.30   11.50
  -2 -15  -4   57.29   13.20
  -2 -15  -4    8.00   11.80
   2 -15   4   38.20   13.10
   3   0 -20  346.47   30.30
   3   0 -19   -8.50    8.90
  -3   0  19  -14.10    9.30
   3   0 -18  -19.10    9.60
  -3   0  18   -6.70    9.50
  -3   0  17   -1.10    9.40
   3   0 -17    7.10    8.40
   3   0 -16  706.53   39.00
  -3   0  16  778.32   35.20
  -3   0  16  780.12   45.10
  -3   0  15   -7.50    9.40
   3   0 -15    5.20    7.10
  -3   0  15   -0.10    5.30
   3   0 -15   -2.40    8.40
  -3   0  14 1679.13   61.09
   3   0 -14 1643.14   82.19
  -3   0  14 1769.62   70.29
   3   0 -14 1599.24   65.59
   3   0 -13   -7.00    4.80
   3   0 -13   -9.60    7.00
  -3   0  13    3.40    4.30
  -3   0  13   -2.50    6.50
   3   0 -12  369.66   22.00
  -3   0  12  382.76   18.70
   3   0 -12  327.77   24.50
  -3   0  12  361.96   24.30
  -3   0  12  344.07   20.20
   3   0 -11   -2.30    6.30
  -3   0  11    2.70    5.80
  -3   0  11    0.50    3.90
   3   0 -11    5.20    5.30
  -3   0  11   -0.70    3.30
  -3   0  10  919.01   36.90
  -3   0  10  933.21   34.80
  -3   0  10 1013.90   40.90
   3   0 -10  889.11   37.90
  -3   0   9    6.40    3.20
   3   0  -9   -0.30    3.70
   3   0  -9    0.40    2.80
  -3   0   9    3.20    2.90
   3   0  -8 3065.79  100.39
  -3   0   8 3088.19  101.29
  -3   0   8 3143.39   97.39
   3   0  -8 3050.29   98.09
  -3   0   8 3027.60   99.29
  -3   0   7    9.90    3.10
  -3   0   7    1.50    4.00
  -3   0   7    6.70    2.20
   3   0  -7    7.80    3.00
   3   0  -7    5.50    2.70
   3   0  -6  790.62   27.10
  -3   0   6  788.02   28.20
  -3   0   6  787.42   26.60
  -3   0   6  757.12   29.20
   3   0  -6  743.33   28.50
   3   0  -5   27.00    3.90
  -3   0   5   35.00    5.00
  -3   0   5   28.40    3.30
   3   0  -5   21.50    3.40
   3   0  -4  149.19    6.50
  -3   0   4  147.89    7.20
   3   0  -4  112.09    7.80
   3   0  -4  141.09    7.60
  -3   0   4  139.69    6.30
  -3   0   3   12.60    1.90
   3   0  -3    8.20    3.10
  -3   0   3   12.30    1.90
   3   0  -3   12.50    2.00
   3   0  -2   12.40    1.70
  -3   0   2   11.60    1.60
   3   0  -2   12.30    1.60
  -3   0   2   11.00    1.80
   3   0  -1    0.70    0.80
   3   0  -1    0.50    0.80
  -3   0   0    3.80    1.20
   3   0   0    4.70    1.40
   3   0   0    4.90    1.30
  -3   0   0    4.60    1.40
   3   0   1    1.00    1.20
  -3   0  -1    0.60    1.50
  -3   0  -1    0.20    0.70
   3   0   1    0.60    1.60
  -3   0  -1    0.80    1.40
   3   0   1    0.80    1.20
   3   0   2   66.59    5.20
   3   0   2   69.69    7.20
   3   0   2   68.69    5.10
  -3   0  -2   54.19    5.90
  -3   0  -2   66.39    5.20
  -3   0  -2   54.09    4.90
  -3   0  -3    3.60    2.10
   3   0   3    1.50    2.20
   3   0   3    2.00    1.90
  -3   0  -3    1.30    2.10
  -3   0  -3    1.90    2.70
   3   0   4   71.39    5.70
  -3   0  -4   73.39    6.80
   3   0   4   71.19    6.60
  -3   0  -4   70.39    7.90
  -3   0  -4   72.39    6.00
  -3   0  -5    0.70    3.10
  -3   0  -5   -0.20    1.90
  -3   0  -5   -0.40    2.40
   3   0   5    9.10    5.20
   3   0   5   -4.30    2.50
   3   0   6  605.24   25.50
  -3   0  -6  629.24   28.10
  -3   0  -6  593.74   23.40
  -3   0  -6  632.34   26.00
   3   0   7    6.50    4.00
  -3   0  -7    5.90    3.80
  -3   0  -7    4.20    3.10
  -3   0  -7    0.20    4.30
   3   0   7   -0.10    3.00
   3   0   7   12.10    7.90
   3   0   8  139.89   11.60
   3   0   8  126.09   11.40
  -3   0  -8  132.49   14.00
  -3   0  -8  122.39    9.60
  -3   0  -8  116.79   11.60
  -3   0  -9    2.90    4.20
   3   0   9   -4.00    3.30
   3   0   9   -7.50    5.70
  -3   0  -9   -5.40    4.60
  -3   0  -9   -0.10    2.70
   3   0   9   -2.10    4.10
   3   0  10   68.79   10.00
   3   0  10   55.89    8.00
  -3   0 -10   53.19    9.10
  -3   0 -10   63.49    8.40
  -3   0 -10   48.60   14.00
  -3   0 -11   -3.40    3.50
   3   0  11   -4.00    9.10
  -3   0 -11   -8.10    4.30
   3   0  11   -2.20    4.40
  -3   0 -12  454.45   22.00
  -3   0 -12  455.55   30.10
  -3   0 -12  457.85   27.70
   3   0  12  502.75   26.20
  -3   0 -13    0.90    5.40
  -3   0 -13   -5.70    8.00
   3   0  13   -1.50   11.90
  -3   0 -14  139.89   19.00
  -3   0 -14  140.69   14.20
   3   0  14   99.19   21.20
   3   0  15   -1.70   15.70
  -3   0 -15   -7.10    7.00
  -3   0 -15  -10.40    4.90
  -3   0 -16   54.69    8.40
  -3   0 -16   60.59   13.90
   3   0  16   59.79   18.60
  -3   0 -17   -1.80    8.30
   3   0  17  -13.90   14.60
   3   0  18   86.29   21.80
  -3   0 -18   93.69   17.40
  -3   0 -19   -7.00   10.40
   3   0  19    1.90   14.60
  -3   1  20   53.39   16.10
   3   1 -20   52.19   13.80
   3  -1 -20   59.39   14.70
  -3   1  19    7.60   11.60
   3   1 -19   20.60   10.10
   3  -1 -19   16.90   11.00
   3   1 -18   -2.50    9.30
  -3   1  18    5.80    9.70
  -3  -1  18   -1.80    9.90
   3  -1 -18   -4.90   16.20
  -3   1  17  228.48   26.90
   3   1 -17  209.88   21.60
  -3  -1  17  221.58   17.90
  -3  -1  17  207.18   25.90
   3  -1 -17  210.98   23.30
   3   1 -16   42.60   10.00
  -3   1  16   33.00   12.80
   3  -1 -16   31.90    6.40
  -3  -1  16   26.80   13.30
   3  -1 -16   33.60    8.90
   3  -1 -16   45.50   11.10
  -3   1  15   47.40   13.30
   3   1 -15   54.39   11.10
  -3   1  15   50.29    8.30
   3   1 -15   29.40   14.00
  -3  -1  15   41.50    8.50
   3  -1 -15   74.59   15.50
   3  -1 -15   47.30   11.10
  -3  -1  15   33.90   13.00
   3   1 -14   21.30   12.60
   3  -1 -14   46.90   10.10
  -3  -1  14   53.59   13.60
  -3   1  13  117.49   11.90
   3   1 -13  125.39   15.10
  -3   1  13  150.98   17.60
  -3  -1  13  117.89   10.70
   3  -1 -13  124.79   15.30
  -3  -1  13  119.19   17.50
   3  -1 -13  115.49   15.40
  -3   1  12   97.49   10.80
  -3   1  12   98.29   15.00
   3   1 -12   79.39   12.30
  -3   1  12   85.49    9.70
  -3  -1  12   99.09   10.90
   3  -1 -12   85.89   11.20
   3  -1 -12   68.89   12.60
  -3  -1  12   86.89   15.20
  -3  -1  12  106.59    9.40
   3  -1 -12  101.79   13.10
  -3   1  11  478.85   22.20
  -3   1  11  464.95   23.20
   3   1 -11  443.76   24.30
  -3   1  11  532.45   27.10
  -3  -1  11  483.75   24.10
   3  -1 -11  480.15   23.50
   3  -1 -11  461.75   24.80
  -3  -1  11  525.85   21.40
  -3  -1  11  515.45   27.80
   3  -1 -11  433.16   31.50
   3   1 -10  484.65   24.20
  -3   1  10  507.05   23.00
  -3   1  10  531.95   26.70
  -3   1  10  503.05   21.90
  -3  -1  10  464.55   23.40
   3  -1 -10  522.75   24.80
   3  -1 -10  490.65   23.10
  -3  -1  10  487.55   21.00
   3  -1 -10  495.45   24.70
  -3  -1  10  525.45   27.60
  -3   1   9  174.58   11.50
   3   1  -9  166.58   12.80
  -3   1   9  162.28   10.60
  -3   1   9  155.78   15.00
  -3  -1   9  136.99   15.20
   3  -1  -9  204.28   14.40
   3  -1  -9  180.48   12.10
   3  -1  -9  187.28   13.50
  -3  -1   9  180.68   10.20
  -3  -1   9  162.38   12.00
   3   1  -8 2508.35   83.99
  -3   1   8 2605.94   82.19
  -3   1   8 2445.06   82.99
  -3   1   8 2691.43   84.79
  -3  -1   8 2535.55   80.59
  -3  -1   8 2604.24   86.89
   3  -1  -8 2493.85   82.99
  -3  -1   8 2483.25   83.39
   3  -1  -8 2462.45   84.39
   3  -1  -8 2617.74   85.69
   3   1  -7  227.68   12.70
  -3   1   7  251.77   13.70
   3   1  -7  199.68   15.20
  -3   1   7  229.78   11.50
  -3   1   7  243.38   12.40
   3  -1  -7  255.47   13.50
  -3  -1   7  238.38   12.40
   3  -1  -7  216.48   13.10
   3  -1  -7  236.48   12.20
  -3  -1   7  249.78   10.50
  -3   1   6 1715.83   54.09
  -3   1   6 1533.05   52.69
   3   1  -6 1580.74   53.19
  -3   1   6 1546.15   54.99
  -3  -1   6 1602.84   52.89
   3  -1  -6 1575.54   52.59
   3  -1  -6 1594.74   53.69
  -3  -1   6 1611.14   50.49
   3   1  -5  433.76   19.50
  -3   1   5  443.96   17.40
  -3   1   5  449.16   16.80
  -3   1   5  431.66   17.00
   3   1  -5  436.96   15.50
   3   1  -5  449.06   17.60
   3  -1  -5  444.36   18.00
  -3  -1   5  454.95   17.40
   3  -1  -5  459.25   17.40
  -3  -1   5  456.45   15.20
  -3   1   4  296.17   12.10
   3   1  -4  280.07   11.80
  -3   1   4  284.37   11.60
   3  -1  -4  291.77   12.40
   3  -1  -4  290.77   11.90
  -3  -1   4  292.97   11.70
  -3   1   3   14.90    2.60
  -3   1   3   20.10    2.60
   3   1  -3   16.60    2.30
   3   1  -3   18.30    2.60
   3   1  -3   22.40    3.40
   3  -1  -3   22.30    3.20
  -3  -1   3   24.50    2.80
  -3  -1   3   18.60    2.40
   3  -1  -3   19.90    2.90
   3   1  -2 3186.58   97.99
  -3   1   2 3366.76   99.19
   3   1  -2 3248.38   98.79
   3  -1  -2 3428.16   99.79
  -3  -1   2 3269.57   97.89
  -3  -1   2 3322.47   98.89
   3  -1  -2 2680.03  101.49
  -3  -1   2 3291.37   99.39
  -3   1   1    1.00    0.90
   3   1  -1    2.30    1.00
   3   1  -1    0.90    1.00
  -3   1   1    1.70    1.10
   3  -1  -1    3.20    1.20
   3  -1  -1    2.20    1.00
  -3  -1   1    2.00    1.10
  -3  -1   1    2.30    1.00
   3   1   0 1630.34   52.09
  -3   1   0 1652.53   52.79
   3   1   0 1625.14   50.49
   3   1   0 1704.03   50.99
   3  -1   0 1506.25   52.69
  -3  -1   0 1744.43   51.09
   3   1   1   32.70    3.80
   3   1   1   30.60    2.90
   3   1   1   31.30    3.10
   3   1   1   31.50    4.40
  -3  -1  -1   31.80    3.90
  -3  -1  -1   33.30    2.90
  -3  -1  -1   32.70    3.20
   3  -1   1   37.30    6.20
  -3  -1  -1   33.50    4.40
   3   1   2  133.09    8.80
   3   1   2  143.39    7.40
   3  -1   2  136.69    7.40
   3  -1   2  138.99    7.90
  -3  -1  -2  151.28    6.90
  -3  -1  -2  141.49    8.80
  -3  -1  -2  130.59    7.80
  -3  -1  -2  140.69    7.50
   3   1   3   61.29    7.30
  -3   1  -3   65.49    6.10
   3   1   3   64.89    5.80
  -3  -1  -3   60.49    6.10
  -3  -1  -3   65.99    6.00
  -3  -1  -3   62.09    5.10
   3  -1   3   72.49    5.60
  -3  -1  -3   62.89    6.80
   3  -1   3   56.59    9.10
  -3   1  -4 1347.97   48.30
  -3   1  -4 1273.07   42.60
   3   1   4 1342.07   44.40
  -3   1  -4 1285.77   44.60
   3   1   4 1275.27   44.90
   3   1   4 1291.87   46.40
  -3  -1  -4 1322.07   44.60
  -3  -1  -4 1279.07   45.90
   3  -1   4 1311.17   42.80
  -3  -1  -4 1312.87   43.90
   3  -1   4 1265.77   44.50
  -3   1  -5   24.60    4.80
   3   1   5   26.00    4.60
   3   1   5   33.70    5.10
  -3   1  -5   19.50    3.50
  -3   1  -5   32.90    6.90
   3   1   5   26.50    6.00
  -3  -1  -5   22.50    3.90
   3  -1   5   31.20    4.50
  -3  -1  -5   21.10    4.50
   3  -1   5   28.00    5.20
  -3  -1  -5   26.80    4.80
   3   1   6 1235.28   44.30
   3   1   6 1242.38   47.80
  -3   1  -6 1208.18   41.50
   3   1   6 1219.78   44.70
  -3   1  -6 1220.88   44.70
  -3   1  -6 1315.47   49.30
   3  -1   6 1210.48   44.60
   3  -1   6 1255.57   41.50
  -3  -1  -6 1232.88   44.80
  -3  -1  -6 1246.68   46.30
  -3  -1  -6 1217.58   42.90
  -3   1  -7  402.76   24.60
   3   1   7  384.86   19.20
  -3   1  -7  374.06   19.80
  -3   1  -7  376.46   16.70
   3   1   7  389.86   24.70
   3   1   7  410.26   19.80
  -3  -1  -7  404.26   20.10
  -3  -1  -7  395.86   18.20
  -3  -1  -7  399.66   21.30
   3  -1   7  394.76   19.70
   3   1   8  151.88   12.20
  -3   1  -8  167.58   10.10
  -3   1  -8  167.28   17.90
  -3   1  -8  173.58   13.30
   3   1   8  135.89   18.00
   3   1   8  175.28   13.00
   3  -1   8  161.98   12.60
  -3  -1  -8  161.88   11.40
  -3  -1  -8  173.58   13.30
  -3  -1  -8  156.58   14.10
  -3   1  -9  294.67   14.50
  -3   1  -9  283.17   18.20
   3   1   9  299.97   21.90
   3   1   9  307.77   18.10
  -3   1  -9  295.37   22.60
  -3  -1  -9  297.47   18.70
   3  -1   9  321.37   17.90
  -3  -1  -9  287.47   19.30
   3  -1   9  316.27   19.00
  -3  -1  -9  302.27   16.10
  -3   1 -10   64.89    8.00
  -3   1 -10   38.20    9.70
   3   1  10   46.10    8.90
   3   1  10   53.49    8.20
  -3   1 -10   54.69    8.80
  -3  -1 -10   48.20    8.60
  -3  -1 -10   56.79   11.20
  -3  -1 -10   56.69    8.70
   3  -1  10   44.00    7.90
   3  -1  10   37.10    7.70
  -3   1 -11   40.70   10.90
   3   1  11   45.80    7.50
  -3   1 -11   46.40    9.00
  -3   1 -11   25.00    5.60
  -3  -1 -11   34.60    9.30
  -3  -1 -11   37.10    8.60
   3  -1  11   32.30   12.50
  -3  -1 -11   57.09    9.70
   3  -1  11   24.80   10.90
  -3   1 -12   38.20    8.80
  -3  -1 -12   13.40    8.40
   3  -1  12   49.80   14.20
  -3  -1 -12   18.50    5.70
   3  -1  12   28.00    6.90
  -3  -1 -12   32.60    9.00
  -3   1 -13  588.84   32.70
  -3  -1 -13  602.24   28.20
   3  -1  13  586.94   43.20
   3  -1  13  542.95   30.90
  -3  -1 -13  579.84   33.00
  -3   1 -14   30.20   10.30
   3   1  14   -0.30   14.30
   3  -1  14   43.20   16.00
  -3  -1 -14   21.20    8.40
  -3  -1 -14   18.20    7.20
   3   1  15  154.38   29.20
  -3   1 -15  169.28   20.20
   3  -1  15  173.38   29.50
  -3  -1 -15  154.78   19.60
  -3  -1 -15  167.68   15.80
  -3   1 -16   11.70   10.10
   3   1  16   -0.40   15.70
  -3  -1 -16   -3.70    6.20
  -3  -1 -16    9.60    9.50
   3  -1  16   -0.30   14.10
  -3   1 -17    6.10   10.10
   3   1  17   -8.50   17.00
   3  -1  17    1.00   13.60
  -3  -1 -17    1.80    6.90
  -3  -1 -17  -10.20    8.40
  -3   1 -18    8.60   10.70
  -3  -1 -18   -5.20    6.70
  -3  -1 -18   -5.30    8.90
   3  -1  18  -20.20   15.00
  -3   2  20    5.80   11.70
   3   2 -20   -3.80    9.60
   3  -2 -20   -6.10   11.00
   3   2 -19   -1.80    9.90
  -3   2  19   -8.70   11.50
   3  -2 -19   -4.50    5.90
   3  -2 -19  -16.20    9.60
   3   2 -18   37.00   13.00
  -3   2  18   34.00   12.40
   3  -2 -18   44.40    8.30
   3  -2 -18   30.80   13.30
  -3  -2  18   41.80    8.70
   3   2 -17   29.50   10.10
  -3   2  17   32.70   11.90
   3  -2 -17   21.50    8.80
   3  -2 -17   31.00   12.40
   3  -2 -17   42.40    7.70
  -3  -2  17   24.60    7.30
  -3   2  16   62.19   23.40
   3   2 -16   62.79   11.50
   3  -2 -16   99.69   15.00
   3  -2 -16   66.49   14.00
  -3  -2  16   66.59   11.30
   3   2 -15    9.60    8.60
  -3   2  15   14.80   10.60
   3  -2 -15   11.10    6.80
   3  -2 -15   15.30    8.90
  -3  -2  15    6.40    5.60
   3   2 -14   15.10    7.90
  -3   2  14   13.30    6.00
  -3   2  14   14.40    9.30
   3  -2 -14    2.60    6.30
  -3  -2  14    5.10    9.70
  -3  -2  14   20.10    5.40
   3  -2 -14    6.40    7.60
   3   2 -13   61.89   10.80
  -3   2  13   57.39   12.40
  -3   2  13   44.90    8.00
  -3  -2  13   66.79    8.90
   3  -2 -13   59.79   10.50
   3  -2 -13   65.89   13.70
   3  -2 -13   48.20    8.50
  -3  -2  13   40.30   13.60
   3   2 -12   11.10    6.20
  -3   2  12   -1.30    8.00
   3   2 -12   -6.20   10.50
  -3   2  12    4.20    4.40
  -3   2  12    7.70    6.70
   3  -2 -12    1.10    6.00
  -3  -2  12    1.00    8.10
  -3  -2  12    7.80    3.90
   3  -2 -12    5.10    5.10
  -3  -2  12    6.50    5.10
   3  -2 -12    5.10    5.20
  -3   2  11  239.88   15.20
   3   2 -11  250.27   17.50
  -3   2  11  258.57   15.90
  -3   2  11  282.67   20.30
   3  -2 -11  272.47   18.90
  -3  -2  11  266.97   13.60
  -3  -2  11  273.47   21.90
   3  -2 -11  246.68   17.10
  -3  -2  11  224.98   18.50
   3  -2 -11  270.27   16.20
  -3   2  10   42.80    9.40
   3   2 -10   31.10    7.00
  -3   2  10   41.80    8.70
  -3   2  10   37.20    5.80
   3  -2 -10   37.10    7.30
  -3  -2  10   34.30    4.90
  -3  -2  10   32.50    6.40
   3  -2 -10   33.80    6.60
   3  -2 -10   35.70    6.90
   3   2  -9  254.47   15.50
  -3   2   9  250.47   14.30
  -3   2   9  234.28   16.80
  -3   2   9  270.77   14.20
   3  -2  -9  272.57   19.50
  -3  -2   9  244.98   14.80
   3  -2  -9  265.27   15.60
   3  -2  -9  250.27   16.10
  -3  -2   9  263.57   12.20
   3   2  -8    6.90    4.20
  -3   2   8    5.30    3.00
  -3   2   8   10.30    3.40
   3   2  -8    4.30    6.20
   3  -2  -8    9.10    4.20
  -3  -2   8    2.10    2.40
  -3  -2   8   -0.20    3.40
   3  -2  -8    8.30    3.70
   3  -2  -8    7.70    3.00
  -3   2   7   86.79    7.60
   3   2  -7   86.09    8.20
  -3   2   7   92.49    7.40
   3   2  -7   86.79   11.20
   3  -2  -7   90.79    8.60
  -3  -2   7   89.89    7.70
  -3  -2   7   87.69    5.50
   3  -2  -7   94.59    8.40
   3  -2  -7   90.19    6.60
   3   2  -6   65.79    9.20
  -3   2   6   89.79    6.90
   3   2  -6   83.49    7.40
   3   2  -6   88.49    7.10
  -3   2   6   92.19    6.80
   3  -2  -6   79.99    7.20
  -3  -2   6   89.49    6.90
   3  -2  -6   85.09    7.50
  -3   2   5  645.04   23.20
   3   2  -5  616.94   23.00
  -3   2   5  651.03   23.50
   3   2  -5  605.54   26.30
   3   2  -5  604.84   23.80
   3  -2  -5  638.34   24.00
  -3  -2   5  630.44   22.90
   3  -2  -5  629.64   23.80
  -3   2   4    5.80    2.20
  -3   2   4    4.70    2.40
   3   2  -4    3.40    2.10
   3   2  -4    3.80    1.80
   3  -2  -4    4.00    2.30
  -3  -2   4    2.50    1.80
  -3  -2   4    4.50    1.50
   3  -2  -4    5.70    2.20
  -3   2   3    5.60    1.90
   3   2  -3    8.30    1.80
   3   2  -3    5.10    2.10
  -3   2   3    6.70    2.00
   3  -2  -3    3.30    1.80
   3  -2  -3    3.80    2.00
  -3  -2   3    7.80    1.90
  -3  -2   3    6.50    2.20
  -3  -2   3    6.30    1.80
  -3   2   2    0.70    1.40
   3   2  -2    0.60    0.90
   3   2  -2    1.20    1.50
   3  -2  -2   -0.10    1.50
  -3  -2   2   -0.60    1.40
   3  -2  -2    0.10    1.40
   3   2  -1  862.41   29.50
  -3   2   1  912.01   29.80
  -3   2   1  931.11   30.60
   3   2  -1  940.51   30.40
  -3  -2   1  960.70   30.70
   3  -2  -1  943.11   29.60
  -3  -2   1  879.01   29.80
   3  -2  -1  890.61   30.80
   3  -2  -1  920.01   30.50
   3   2   0   49.90    4.30
   3   2   0   50.59    4.10
  -3   2   0   49.90    3.50
   3  -2   0   50.29    3.30
   3  -2   0   47.60    4.20
  -3  -2   0   56.79    5.50
  -3  -2   0   51.29    4.20
   3  -2   0   37.70    8.00
   3   2   1 1746.43   60.69
  -3   2  -1 1961.70   57.49
   3   2   1 1701.23   57.59
   3   2   1 1770.02   59.49
   3   2   1 1947.81   58.99
  -3  -2  -1 1749.82   59.69
  -3  -2  -1 2047.90   58.99
   3  -2   1 1948.71   57.69
  -3  -2  -1 1834.72   57.99
   3   2   2   70.09    6.60
   3   2   2   69.09    5.10
  -3   2  -2   75.69    4.50
   3   2   2   75.49    5.70
   3   2   2   72.19    7.10
  -3  -2  -2   72.89    6.80
  -3  -2  -2   65.69    5.30
  -3  -2  -2   79.89    5.60
  -3  -2  -2   68.29    6.80
   3  -2   2   74.29    4.60
   3   2   3 5893.41  180.48
  -3   2  -3 5814.32  177.68
   3   2   3 5918.51  181.68
   3   2   3 5899.71  178.88
   3  -2   3 6012.10  180.48
  -3  -2  -3 4999.40  187.78
  -3  -2  -3 5695.93  180.78
  -3  -2  -3 5897.61  179.28
  -3  -2  -3 6289.97  179.28
   3   2   4   18.90    3.80
  -3   2  -4   14.40    2.70
   3   2   4   20.10    3.90
   3   2   4   18.40    4.10
  -3   2  -4   10.70    5.40
   3  -2   4   19.90    4.00
  -3  -2  -4   20.70    3.50
   3  -2   4   29.90    4.50
  -3  -2  -4   15.50    3.80
  -3  -2  -4   20.80    4.20
   3  -2   4   12.00    5.50
  -3   2  -5 1910.11   64.99
   3   2   5 1953.40   64.09
   3   2   5 1922.51   66.69
   3   2   5 1924.71   65.19
   3  -2   5 1947.21   61.99
  -3  -2  -5 1977.80   63.59
  -3  -2  -5 1925.01   66.19
   3  -2   5 1935.31   65.19
  -3  -2  -5 1926.01   64.69
   3   2   6   26.60    5.20
   3   2   6   27.80    5.30
  -3   2  -6   15.00    5.10
   3   2   6   17.90    6.40
  -3   2  -6   22.20    7.80
  -3  -2  -6   23.10    5.40
   3  -2   6   14.30    7.40
   3  -2   6   20.80    5.40
   3  -2   6   17.60    3.40
  -3  -2  -6   19.20    5.20
   3   2   7 1533.95   53.49
  -3   2  -7 1410.96   60.49
  -3   2  -7 1467.35   54.29
   3   2   7 1587.84   57.49
   3   2   7 1511.75   54.39
  -3  -2  -7 1518.15   54.69
  -3  -2  -7 1545.25   55.69
   3  -2   7 1518.95   50.09
   3  -2   7 1532.75   54.79
  -3  -2  -7 1554.44   53.19
   3   2   8   27.00    5.80
  -3   2  -8   28.50    6.70
   3   2   8   35.30    9.40
  -3   2  -8   24.00    9.40
   3   2   8   30.70    5.90
   3  -2   8   48.00   11.10
  -3  -2  -8   22.10    6.60
   3  -2   8   35.90    5.70
  -3  -2  -8   20.50    6.10
   3  -2   8   26.40    6.60
  -3  -2  -8   27.40    5.50
   3   2   9  538.25   32.20
   3   2   9  599.04   29.90
  -3   2  -9  641.54   31.20
   3   2   9  644.54   30.20
   3  -2   9  580.74   27.70
  -3  -2  -9  599.14   29.40
   3  -2   9  532.05   34.00
  -3  -2  -9  619.14   26.40
  -3  -2  -9  610.74   28.90
   3   2  10  136.69   13.10
  -3   2 -10   98.19   20.20
  -3   2 -10  131.69   13.80
   3   2  10  119.19   12.50
  -3  -2 -10  116.09   14.50
   3  -2  10  116.49   12.80
  -3  -2 -10  135.49   12.20
  -3  -2 -10  119.99   14.00
   3  -2  10  118.89   21.20
   3   2  11   -6.80    8.80
  -3   2 -11  -14.30    8.50
   3   2  11   -2.00    4.60
  -3   2 -11    1.30    6.10
   3  -2  11   12.50   11.40
   3  -2  11   -2.30    5.40
  -3  -2 -11    4.90    4.80
  -3  -2 -11   -8.20    6.50
  -3  -2 -11   -3.00    5.80
   3   2  12    6.90   11.50
  -3   2 -12    7.90    7.50
   3  -2  12    9.90   13.20
   3  -2  12  -10.80    5.20
  -3  -2 -12   -2.40    5.40
  -3  -2 -12   -2.00    7.30
  -3  -2 -12   -7.90    5.90
  -3   2 -13  318.77   24.20
  -3  -2 -13  318.07   21.30
   3  -2  13  375.96   35.30
  -3  -2 -13  315.57   24.90
   3  -2  13  299.17   21.90
  -3   2 -14   64.59   13.00
  -3  -2 -14   58.49    9.70
   3  -2  14   48.90   17.30
  -3  -2 -14   58.39   11.90
   3   2  15   28.60   14.90
  -3   2 -15   33.60   10.50
   3  -2  15   42.50   14.30
  -3  -2 -15   33.10    8.90
   3   2  16   22.00   15.70
  -3   2 -16   47.00   13.30
  -3  -2 -16   37.90   13.70
  -3  -2 -16   33.50   11.90
   3  -2  16   40.80   15.30
   3   2  17   -6.00   18.00
  -3   2 -17   -9.00    9.20
   3  -2  17    4.40   12.00
  -3  -2 -17   -2.40    7.80
  -3  -2 -17   -0.40    9.70
   3   2  18   20.80   20.90
  -3   2 -18   23.70   12.00
   3  -2  18   41.60   16.00
  -3  -2 -18   29.60    9.90
  -3  -2 -18   21.20   13.40
   3   3 -20   23.60   12.00
  -3   3  20   17.50   13.50
   3   3 -20    5.40   10.90
   3  -3 -20   21.80   12.30
   3  -3 -20    5.90   10.60
   3   3 -19   13.90   10.30
  -3   3  19  -14.70   10.90
   3   3 -19   -0.20    9.20
   3  -3 -19   -2.90   10.50
  -3  -3  19    1.70   10.40
   3   3 -18    6.30    9.50
  -3   3  18   29.00   12.10
   3   3 -18   10.00   10.80
   3  -3 -18   16.80   11.70
   3  -3 -18   32.90    9.50
   3  -3 -18    7.60   12.70
   3   3 -17    4.70    8.20
  -3   3  17   14.40   11.30
   3   3 -17    3.30    7.60
  -3  -3  17   -6.00    9.10
   3  -3 -17    0.80    7.40
   3  -3 -17  -15.10    8.10
   3   3 -16    5.80    7.40
  -3   3  16  -10.00    9.60
   3   3 -16   -4.70    6.80
  -3  -3  16    0.30    5.10
  -3   3  15    1.70   10.60
   3   3 -15    6.30    6.90
   3   3 -15    4.10    7.70
   3  -3 -15   19.80    6.90
   3  -3 -15    7.30    7.50
   3  -3 -15   -2.10    8.60
  -3  -3  15   14.60    6.00
  -3   3  14   35.90   11.90
   3   3 -14   33.50    9.60
   3   3 -14   35.90    9.80
   3  -3 -14   20.40    8.40
  -3  -3  14   28.00    5.90
   3  -3 -14   11.00    9.10
   3  -3 -14   23.80    6.90
  -3   3  13   -3.80    4.30
   3   3 -13   -7.20    6.40
  -3   3  13   -1.60    9.30
   3   3 -13   -6.00    5.60
   3   3 -13  -11.10    5.60
   3  -3 -13   -4.90    4.90
  -3  -3  13   -3.40    3.40
   3  -3 -13  -11.60    5.10
   3   3 -12   53.19    9.40
   3   3 -12   55.89    8.90
  -3   3  12   52.89   11.40
  -3  -3  12   79.39   10.90
   3  -3 -12   65.99   16.10
  -3  -3  12   79.79    8.20
   3  -3 -12   55.19   10.80
   3  -3 -12   55.39    9.70
  -3   3  11   18.30    5.30
  -3   3  11    8.30    6.50
   3   3 -11   22.10    6.10
  -3   3  11   19.70    7.20
   3   3 -11   11.50    8.40
   3  -3 -11   18.20    6.70
  -3  -3  11   17.90    6.20
   3  -3 -11   18.40    6.60
  -3  -3  11   28.10    4.40
   3  -3 -11   23.40    5.40
  -3   3  10    0.30    3.50
  -3   3  10    2.00    3.30
  -3   3  10   -0.20    4.80
   3   3 -10   -9.20    5.90
   3   3 -10    1.90    4.30
   3   3 -10    3.00    4.10
   3  -3 -10   -1.00    4.60
  -3  -3  10    2.40    3.30
   3  -3 -10    5.30    3.40
  -3  -3  10    3.90    4.50
   3   3  -9   69.99    9.80
   3   3  -9   85.89    9.60
  -3   3   9   92.69    8.90
  -3   3   9   76.49    8.60
   3  -3  -9   88.69   10.30
  -3  -3   9   87.79    6.60
   3  -3  -9   79.99    7.90
   3  -3  -9   67.09   10.40
  -3  -3   9   86.79    9.40
   3   3  -8 1100.89   41.10
  -3   3   8 1101.79   40.10
  -3   3   8 1082.19   39.70
   3   3  -8 1082.19   40.20
   3   3  -8 1104.89   46.70
   3  -3  -8 1113.59   41.90
   3  -3  -8 1078.59   37.70
   3  -3  -8 1095.79   41.60
  -3  -3   8 1109.89   40.40
   3   3  -7   43.90    7.10
   3   3  -7   30.00    7.20
  -3   3   7   39.30    6.00
   3   3  -7   35.90    5.50
  -3   3   7   31.00    4.80
   3  -3  -7   29.10    5.80
  -3  -3   7   41.00    6.60
   3  -3  -7   33.00    6.10
  -3   3   6  205.98   11.20
  -3   3   6  221.78   11.50
   3   3  -6  201.18   10.90
   3   3  -6  212.28   11.90
   3   3  -6  180.38   14.10
   3  -3  -6  196.18   12.00
   3  -3  -6  205.58   12.00
  -3  -3   6  196.98   11.00
  -3   3   5  173.68    9.90
   3   3  -5  180.18    9.40
  -3   3   5  170.98    9.90
   3   3  -5  176.28   10.50
   3  -3  -5  187.88   10.70
  -3  -3   5  190.58    9.60
  -3  -3   5  177.68   10.60
   3  -3  -5  186.88   11.00
   3   3  -4  583.84   21.40
   3   3  -4  582.94   23.20
  -3   3   4  600.34   22.90
  -3   3   4  623.04   23.00
   3  -3  -4  630.64   23.40
  -3  -3   4  640.24   23.80
   3  -3  -4  623.24   23.20
   3  -3  -4  614.44   23.60
  -3  -3   4  612.64   21.70
  -3   3   3   53.09    5.40
   3   3  -3   51.09    5.40
  -3  -3   3   54.59    3.90
   3  -3  -3   48.80    5.40
   3  -3  -3   57.09    5.20
  -3  -3   3   55.19    5.50
   3  -3  -3   34.80    6.80
   3   3  -2 1568.54   49.90
  -3   3   2 1284.37   53.99
  -3   3   2 1596.84   49.90
   3   3  -2 1483.15   47.70
  -3   3   2 1546.05   49.40
   3  -3  -2 1579.24   50.19
   3  -3  -2 1609.84   49.40
  -3  -3   2 1491.15   48.00
   3   3  -1    2.00    2.00
  -3   3   1    3.30    3.60
  -3   3   1    2.00    2.20
   3   3  -1    0.40    1.40
  -3   3   1    1.90    1.90
  -3  -3   1    0.30    1.70
   3  -3  -1    2.60    1.80
  -3  -3   1    2.70    2.50
   3  -3  -1    2.20    1.80
  -3   3   0  438.36   15.70
   3   3   0  399.56   16.00
   3   3   0  444.86   16.50
  -3   3   0  397.46   19.70
  -3   3   0  422.96   16.50
   3  -3   0  367.66   18.00
  -3  -3   0  446.46   17.00
  -3  -3   0  397.26   16.40
   3  -3   0  441.36   15.40
   3  -3   0  404.56   16.30
   3   3   1   -1.50    1.90
  -3   3  -1   -2.00    1.30
   3   3   1   -2.30    1.70
   3   3   1   -0.30    1.20
  -3   3  -1    2.40    4.50
  -3  -3  -1    0.40    1.40
   3  -3   1    0.00    1.70
   3  -3   1   -1.40    1.50
  -3  -3  -1    2.30    2.10
   3   3   2 5632.94  169.68
   3   3   2 5212.58  170.78
  -3   3  -2 5581.04  167.28
   3   3   2 5266.07  167.18
   3   3   2 5605.04  169.28
   3  -3   2 5414.56  172.88
  -3  -3  -2 5153.78  167.58
  -3  -3  -2 5394.16  170.18
   3  -3   2 5751.32  167.78
  -3  -3  -2 5745.62  168.88
   3   3   3   -1.20    2.50
  -3   3  -3   -3.40    3.90
   3   3   3    4.60    2.40
   3   3   3   -0.10    1.80
   3   3   3    1.40    2.30
  -3   3  -3    0.20    1.70
  -3  -3  -3    0.40    2.30
  -3  -3  -3    1.80    2.20
   3  -3   3    3.70    4.50
   3  -3   3    1.60    2.00
  -3  -3  -3   -0.60    2.40
  -3   3  -4 2366.06   76.29
   3   3   4 2408.76   80.29
   3   3   4 2430.46   79.09
   3   3   4 2356.86   76.99
   3  -3   4 2389.66   79.09
  -3  -3  -4 2399.06   80.09
  -3  -3  -4 2530.75   77.99
  -3  -3  -4 2379.86   77.99
  -3  -3  -4 2383.66   79.89
   3  -3   4 2420.16   83.69
   3   3   5  423.86   20.90
  -3   3  -5  393.86   17.20
   3   3   5  407.66   19.70
   3   3   5  408.46   18.20
   3  -3   5  433.36   25.00
  -3  -3  -5  422.96   18.50
   3  -3   5  421.56   19.80
  -3  -3  -5  415.36   20.90
  -3  -3  -5  392.06   19.00
  -3  -3  -5  438.36   20.60
  -3   3  -6  126.39    9.20
   3   3   6  137.49   11.30
   3   3   6  141.49   12.90
   3   3   6  122.59   10.40
  -3   3  -6  115.39   18.90
   3  -3   6  134.99    8.70
  -3  -3  -6  135.29   12.20
   3  -3   6  126.99   11.00
  -3  -3  -6  130.59   12.60
  -3  -3  -6  112.89   11.30
  -3  -3  -6  134.59   10.20
  -3   3  -7  253.97   14.10
   3   3   7  263.97   14.80
   3   3   7  266.37   16.40
  -3   3  -7  244.78   16.10
   3   3   7  258.77   17.70
  -3  -3  -7  253.97   16.50
  -3  -3  -7  275.97   15.20
  -3  -3  -7  260.17   16.40
   3  -3   7  262.67   12.70
   3  -3   7  259.47   16.20
   3  -3   7  287.97   23.00
   3   3   8   19.20    5.50
   3   3   8   16.70    7.20
  -3   3  -8   16.70    4.70
  -3   3  -8   13.30    5.60
   3   3   8   13.40    4.60
  -3   3  -8   10.80    9.00
  -3  -3  -8   15.60    4.80
  -3  -3  -8   13.20    5.50
   3  -3   8    9.90    3.40
   3  -3   8   21.10    9.20
   3  -3   8   13.10    5.40
  -3  -3  -8   18.60    5.50
  -3   3  -9   -0.70    4.70
   3   3   9   -0.30    7.00
   3   3   9   -4.20    3.90
  -3   3  -9   -4.10    3.50
   3  -3   9   -0.40    4.90
   3  -3   9   -1.70    3.00
  -3  -3  -9   -2.20    3.90
  -3  -3  -9   -6.80    3.90
   3   3  10  626.74   30.30
  -3   3 -10  604.54   40.60
  -3   3 -10  677.13   32.10
  -3   3 -10  631.74   29.40
   3   3  10  637.34   31.00
   3   3  10  650.33   36.50
  -3  -3 -10  681.73   33.10
  -3  -3 -10  701.63   30.60
  -3  -3 -10  699.93   33.00
   3  -3  10  627.64   32.00
  -3  -3 -10  707.53   30.80
   3  -3  10  764.92   41.20
  -3   3 -11  270.57   20.50
  -3   3 -11  271.97   18.80
  -3  -3 -11  260.27   18.70
   3  -3  11  314.47   28.50
  -3  -3 -11  278.37   25.50
  -3  -3 -11  280.37   21.90
  -3  -3 -11  298.27   19.40
  -3   3 -12   36.30    8.10
  -3   3 -12   48.80   10.20
   3  -3  12   39.40    7.90
  -3  -3 -12   37.70    9.60
   3  -3  12   59.49   15.00
  -3  -3 -12   45.40    9.60
  -3  -3 -12   27.80    8.00
  -3   3 -13  503.95   30.50
  -3   3 -13  554.24   28.00
   3  -3  13  476.65   39.30
  -3  -3 -13  469.05   31.10
  -3  -3 -13  518.05   32.80
  -3  -3 -13  570.84   33.60
   3  -3  13  510.35   28.20
  -3   3 -14   11.20    8.10
   3   3  14   45.40   15.30
  -3   3 -14   12.70    7.10
   3  -3  14   10.10   13.10
  -3  -3 -14    9.90    7.90
  -3  -3 -14   18.50    9.40
  -3   3 -15   54.99   10.40
  -3   3 -15   68.69   12.80
   3   3  15   51.79   14.70
   3  -3  15   70.09   17.20
  -3  -3 -15   60.69   10.90
  -3  -3 -15   73.09   13.70
  -3   3 -16   20.70    8.60
   3   3  16   13.00   14.20
  -3   3 -16   49.30   20.90
  -3  -3 -16   23.00    8.90
   3  -3  16   42.20   13.70
  -3  -3 -16   47.40   17.30
   3   3  17   44.40   19.90
  -3   3 -17   30.90   10.80
  -3   3 -17   21.80   11.00
  -3  -3 -17   15.40   12.40
  -3  -3 -17   11.00    9.80
  -3   3 -18   12.30    9.90
   3   3  18    0.60   19.90
  -3   3 -18   18.20    9.70
  -3  -3 -18   31.40   12.30
  -3  -3 -18   -1.10    9.00
   3  -3  18   25.70   15.00
  -3   4  19  125.19   22.60
   3   4 -19   88.49   15.50
   3   4 -19   74.19   14.60
   3  -4 -19   54.49   14.80
   3  -4 -19   74.29   12.90
   3   4 -18   23.90   16.90
   3   4 -18    5.80    9.70
  -3   4  18   17.50   10.70
   3  -4 -18   25.10   12.00
  -3   4  17   26.30   12.80
   3   4 -17   32.70    9.60
   3   4 -17   31.50   10.60
  -3  -4  17   15.60    6.90
   3  -4 -17   30.10   12.20
   3  -4 -17   16.60    8.00
   3   4 -16  106.19   16.50
   3   4 -16  109.99   15.80
  -3   4  16   76.29   16.50
   3  -4 -16   97.79   13.50
  -3  -4  16  108.69   12.10
   3  -4 -16   64.79   14.10
   3  -4 -16   82.29   14.10
   3   4 -15   -4.60    6.00
   3   4 -15   -7.80    6.90
   3  -4 -15  -11.00    7.50
  -3  -4  15   -6.70    4.40
   3  -4 -15    2.80    5.40
   3  -4 -15   -4.50    6.50
   3   4 -14  313.77   23.10
  -3   4  14  346.37   27.90
   3   4 -14  309.57   22.50
   3  -4 -14  301.27   25.20
   3  -4 -14  291.37   24.70
  -3  -4  14  344.67   17.70
   3  -4 -14  314.27   19.80
  -3   4  13   91.09   18.20
   3   4 -13   96.89   15.20
   3   4 -13   87.29   13.80
  -3  -4  13   64.09    8.80
   3  -4 -13   46.90   11.00
   3  -4 -13   67.59   11.80
   3   4 -12  107.59   13.10
   3   4 -12   69.89   10.70
  -3   4  12  107.69   12.00
   3  -4 -12   95.89   11.30
  -3  -4  12   92.79   12.00
   3  -4 -12   91.59   14.50
  -3  -4  12  107.39    8.80
   3  -4 -12   83.39   12.60
   3   4 -11  252.07   17.90
   3   4 -11  283.97   17.90
  -3   4  11  219.18   15.80
   3  -4 -11  258.97   20.80
   3  -4 -11  251.07   15.00
  -3  -4  11  252.47   16.90
   3  -4 -11  287.87   19.80
  -3  -4  11  230.38   15.80
   3   4 -10  108.49   11.80
  -3   4  10   98.59    9.80
   3   4 -10   72.09   14.60
  -3   4  10   97.59   12.90
   3   4 -10  103.19   11.00
   3  -4 -10   95.39   12.40
  -3  -4  10  103.19    7.50
   3  -4 -10   95.99   13.60
  -3  -4  10   96.09   10.70
   3  -4 -10   97.59   10.50
   3   4  -9   13.20    7.80
   3   4  -9   22.20    5.50
   3   4  -9   18.80    5.30
  -3   4   9   22.30    4.80
  -3   4   9   17.80    5.10
   3  -4  -9   13.90    6.00
  -3  -4   9   16.20    5.00
   3  -4  -9   21.60    6.10
   3   4  -8  738.03   35.50
   3   4  -8  693.23   29.60
  -3   4   8  705.23   27.60
   3   4  -8  696.73   28.60
  -3   4   8  676.53   28.50
  -3   4   8  678.83   28.70
   3  -4  -8  757.92   31.50
  -3  -4   8  712.03   28.90
   3  -4  -8  752.92   31.00
   3   4  -7  180.28   12.30
   3   4  -7  144.19   16.40
   3   4  -7  178.28   11.10
  -3   4   7  170.88   11.00
  -3  -4   7  170.68   11.20
   3  -4  -7  156.38   12.20
   3  -4  -7  162.98   12.90
   3  -4  -7  173.98   12.60
   3   4  -6  150.48   14.70
  -3   4   6  146.19   10.30
   3   4  -6  173.78   11.50
  -3   4   6  151.78   10.50
   3   4  -6  170.58   10.10
   3  -4  -6  152.18   11.50
  -3  -4   6  154.28   10.10
   3  -4  -6  143.39   11.20
   3  -4  -6  151.08   12.00
  -3  -4   6  153.28   11.50
  -3   4   5  808.92   30.00
   3   4  -5  788.32   30.10
  -3   4   5  786.12   29.60
  -3  -4   5  808.82   30.80
   3  -4  -5  795.22   30.20
   3  -4  -5  824.92   30.20
  -3  -4   5  743.73   28.80
   3  -4  -5  780.42   30.90
   3   4  -4    4.70    2.40
  -3   4   4    2.40    2.40
   3  -4  -4    5.50    3.00
  -3  -4   4    3.80    2.10
   3  -4  -4    4.00    3.20
  -3  -4   4    4.20    2.90
   3  -4  -4    1.40    2.50
   3   4  -3 1800.42   60.09
  -3   4   3 1872.31   60.79
   3   4  -3 1765.62   57.19
  -3   4   3 1829.62   60.29
   3  -4  -3 1879.91   60.99
  -3  -4   3 1632.94   59.59
   3  -4  -3 1899.51   60.09
   3  -4  -3 1869.61   60.09
  -3  -4   3 1919.91   61.29
  -3  -4   3 1826.92   57.89
   3   4  -2   80.99    5.60
  -3   4   2  101.99    7.60
  -3   4   2   77.69    7.70
  -3   4   2   88.79    7.00
   3   4  -2   91.89    7.00
   3  -4  -2   86.29    7.40
  -3  -4   2   76.79    6.00
   3  -4  -2  105.59    6.80
  -3  -4   2   83.09    7.20
  -3   4   1   41.70    5.20
  -3   4   1   25.80    4.70
   3   4  -1   35.40    5.20
   3   4  -1   33.40    4.30
  -3   4   1   39.00    4.90
  -3  -4   1   31.40    5.30
   3  -4  -1   47.20    5.60
   3  -4  -1   41.50    5.20
  -3  -4   1   27.30    4.50
  -3   4   0   29.30    6.40
  -3   4   0   30.70    4.60
  -3   4   0   29.20    4.40
   3   4   0   30.00    5.10
   3   4   0   23.50    6.30
  -3  -4   0   29.40    4.90
  -3  -4   0   27.00    4.00
   3  -4   0   32.00    4.80
   3  -4   0   35.70    5.10
  -3  -4   0   20.40    3.30
   3   4   1  562.54   21.00
  -3   4  -1  526.65   19.20
   3   4   1  474.05   17.80
   3   4   1  483.05   20.00
  -3   4  -1  559.04   25.10
  -3   4  -1  508.05   20.00
  -3  -4  -1  549.25   20.40
   3  -4   1  491.35   19.60
   3  -4   1  503.05   23.10
   3  -4   1  514.65   19.90
  -3  -4  -1  473.65   18.00
  -3  -4  -1  477.75   20.60
  -3   4  -2  191.38    9.40
   3   4   2  183.38    8.90
   3   4   2  181.58   10.80
   3   4   2  183.28   10.80
  -3  -4  -2  199.98   10.60
  -3  -4  -2  188.28   11.40
   3  -4   2  174.98    9.80
   3  -4   2  196.98   13.80
  -3  -4  -2  171.68    9.10
   3  -4   2  150.48   13.30
   3   4   3 1101.69   43.10
   3   4   3 1161.08   41.20
  -3   4  -3 1193.98   39.50
   3   4   3 1167.58   41.90
   3   4   3 1210.68   42.00
   3  -4   3 1103.79   39.90
  -3  -4  -3 1146.09   40.10
  -3  -4  -3 1231.98   41.20
   3  -4   3 1222.48   46.20
   3  -4   3 1256.17   41.00
  -3  -4  -3 1134.09   42.70
   3   4   4  193.78   12.40
   3   4   4  181.88   13.80
   3   4   4  206.68   13.10
   3   4   4  180.88   10.60
  -3   4  -4  198.88   10.70
   3  -4   4  200.88   17.10
  -3  -4  -4  179.08   11.60
   3  -4   4  200.68   11.20
  -3  -4  -4  210.78   12.10
   3  -4   4  226.98   13.40
  -3  -4  -4  190.78   13.70
  -3   4  -5 1237.78   42.10
   3   4   5 1231.58   44.80
   3   4   5 1166.68   42.10
   3   4   5 1216.98   46.10
  -3  -4  -5 1180.88   43.70
  -3  -4  -5 1209.38   46.30
   3  -4   5 1255.67   50.59
  -3  -4  -5 1262.17   43.70
   3  -4   5 1208.58   44.90
   3   4   6   72.79   10.60
  -3   4  -6   68.19    7.60
   3   4   6   78.89    9.80
   3   4   6   60.29    7.60
  -3  -4  -6   82.39    9.00
   3  -4   6   76.99    9.40
   3  -4   6   52.59   10.50
  -3  -4  -6   62.59    8.10
  -3  -4  -6   68.59   10.80
   3   4   7  897.31   36.40
   3   4   7  934.81   38.40
  -3   4  -7  894.01   34.00
   3   4   7  917.41   34.50
  -3  -4  -7  931.71   36.90
  -3  -4  -7  926.01   35.40
  -3  -4  -7  890.41   37.20
  -3  -4  -7  905.41   38.60
   3  -4   7  842.02   36.50
   3  -4   7  916.21   42.90
   3   4   8   66.99    8.20
   3   4   8   46.00    7.80
  -3   4  -8   61.09    8.50
   3   4   8   56.19   11.70
  -3  -4  -8   60.59   10.50
  -3  -4  -8   42.10    7.80
   3  -4   8   40.70   13.00
   3  -4   8   40.10    7.70
  -3  -4  -8   47.50    9.40
   3  -4   8   76.99   10.80
  -3  -4  -8   60.99    9.40
  -3   4  -9   20.40   10.80
   3   4   9   47.70    7.90
   3   4   9   41.10    6.90
  -3  -4  -9   41.00    8.60
   3  -4   9   75.09   11.60
   3  -4   9   41.60    6.90
  -3  -4  -9   52.49    9.80
  -3  -4  -9   61.79   14.50
   3   4  10  504.75   30.70
   3   4  10  476.25   24.60
  -3   4 -10  476.45   24.90
  -3  -4 -10  516.45   28.00
  -3  -4 -10  468.05   27.40
  -3  -4 -10  534.55   26.00
   3  -4  10  481.25   33.70
   3   4  11   34.10   12.50
  -3   4 -11   26.10    8.30
  -3   4 -11   26.80    8.30
  -3  -4 -11   21.50    9.00
  -3  -4 -11   15.50    7.90
   3  -4  11   27.70   11.50
   3   4  12   45.90   16.30
  -3   4 -12   92.09   13.70
  -3   4 -12   85.69   12.90
  -3  -4 -12   58.69   11.90
  -3  -4 -12   73.29   14.80
  -3  -4 -12   70.99   11.60
   3  -4  12   74.19   15.60
  -3   4 -13   42.50    8.90
  -3   4 -13   64.29   12.40
   3  -4  13   48.00    9.60
  -3  -4 -13   47.50    9.90
   3  -4  13   37.00   13.50
  -3  -4 -13   51.09   11.30
  -3  -4 -13   46.20   11.20
   3   4  14   12.20   13.00
  -3   4 -14   11.60    8.40
  -3   4 -14   10.30    7.20
  -3  -4 -14   19.90   10.10
   3  -4  14   18.30   13.10
  -3  -4 -14    9.30    7.60
   3  -4  14   12.40    9.70
  -3   4 -15    2.70    6.50
  -3   4 -15    8.50    9.30
   3   4  15   10.70   12.00
   3  -4  15    0.80   10.80
  -3  -4 -15    1.60    9.00
  -3  -4 -15  -10.70    7.90
  -3   4 -16  192.68   19.80
  -3   4 -16  183.28   24.30
  -3  -4 -16  164.58   21.50
   3  -4  16  196.48   28.50
  -3  -4 -16  213.78   34.30
   3   4  17   43.20   17.60
  -3   4 -17    1.50    8.70
  -3   4 -17   13.20   11.00
   3  -4  17   10.80   13.10
  -3  -4 -17   -1.80    9.90
  -3  -4 -17   11.60   11.60
  -3   4 -18  170.98   24.40
  -3   4 -18  209.18   22.90
  -3  -4 -18  237.48   27.40
   3  -4  18  185.28   32.40
  -3  -4 -18  184.38   23.60
   3   5 -19  222.18   24.50
  -3   5  19  268.27   28.30
   3   5 -19  229.58   24.40
   3  -5 -19  209.28   27.10
   3   5 -18    3.20   15.80
   3   5 -18   19.20   13.50
   3  -5 -18   21.40   12.20
  -3  -5  18   13.30    7.50
  -3   5  17  894.81   49.90
   3   5 -17  801.72   41.80
   3   5 -17  776.42   41.80
   3  -5 -17  752.82   48.40
   3  -5 -17  733.63   50.59
   3  -5 -17  804.12   45.40
  -3  -5  17  778.62   33.90
   3   5 -16   -6.50    7.90
   3   5 -16    3.10    6.80
  -3   5  16   -4.40   13.10
   3  -5 -16   -8.20    7.90
   3  -5 -16   -1.80    5.50
  -3  -5  16    3.80    5.30
   3  -5 -16  -11.10    7.70
   3   5 -15    7.80    7.30
  -3   5  15    5.90   13.20
   3   5 -15    1.90    7.40
  -3  -5  15    3.30    5.30
   3  -5 -15   -7.90    6.20
   3  -5 -15  -10.80    7.20
   3   5 -14   21.40    8.40
   3   5 -14   23.00    9.00
  -3   5  14   23.50   11.50
   3  -5 -14   19.80    8.60
  -3  -5  14   23.00    5.30
   3  -5 -14   10.40   10.00
   3   5 -13  711.73   34.80
   3   5 -13  674.63   33.50
   3  -5 -13  675.03   37.40
  -3  -5  13  696.73   27.90
   3  -5 -13  702.83   37.10
  -3   5  12   21.70    7.80
   3   5 -12   27.30    8.20
   3   5 -12   18.80    7.30
   3  -5 -12    9.60    7.20
  -3  -5  12   25.10    7.70
  -3  -5  12   14.80    4.50
   3  -5 -12    5.30    7.50
   3   5 -11 1738.33   64.99
   3   5 -11 1687.73   68.09
  -3   5  11 1809.52   69.89
   3  -5 -11 1847.82   68.59
  -3  -5  11 1745.03   64.79
   3  -5 -11 1765.52   67.19
   3   5 -10    8.50    5.40
  -3   5  10    9.90    6.20
  -3   5  10    7.10    4.70
   3   5 -10   -3.30    8.60
  -3   5  10   12.20    3.90
   3   5 -10    1.70    4.60
   3  -5 -10    9.00    5.80
   3  -5 -10   15.10    6.70
   3  -5 -10    3.20    4.70
  -3  -5  10   13.40    5.70
   3   5  -9  337.97   25.40
  -3   5   9  312.97   17.80
   3   5  -9  338.27   19.10
  -3   5   9  318.27   17.90
   3   5  -9  349.17   18.50
  -3  -5   9  316.77   18.50
   3  -5  -9  355.56   23.50
   3  -5  -9  346.47   22.00
   3  -5  -9  316.97   18.70
   3   5  -8   76.99    9.60
   3   5  -8   71.09   12.60
   3   5  -8   78.59    9.20
  -3   5   8   67.09    8.60
  -3   5   8   62.09    8.60
   3  -5  -8   50.49    8.30
  -3  -5   8   74.89    8.90
   3  -5  -8   49.99    8.30
  -3   5   7  255.27   14.40
  -3   5   7  239.18   14.50
   3   5  -7  245.28   19.50
   3   5  -7  257.87   15.50
   3  -5  -7  241.58   15.10
   3  -5  -7  243.08   15.70
   3  -5  -7  265.37   17.00
  -3  -5   7  246.08   15.60
  -3  -5   7  244.18   14.30
  -3   5   6   10.20    3.80
   3   5  -6   15.10    4.60
  -3   5   6    9.30    3.50
   3   5  -6   14.90    6.30
   3  -5  -6    8.60    4.50
   3  -5  -6   10.80    4.90
  -3  -5   6    4.00    3.80
  -3  -5   6   10.40    4.10
   3  -5  -6   12.70    4.80
   3   5  -5 1288.87   45.10
  -3   5   5 1260.87   45.00
   3  -5  -5 1234.28   46.30
  -3  -5   5 1286.67   46.20
  -3  -5   5 1238.38   41.40
  -3  -5   5 1268.77   43.70
   3  -5  -5 1299.07   45.60
   3  -5  -5 1244.58   45.00
  -3   5   4   17.20    3.80
   3   5  -4   17.90    4.30
  -3   5   4   14.20    4.60
   3  -5  -4   13.50    3.70
   3  -5  -4   19.00    4.40
   3  -5  -4    6.10    4.30
  -3  -5   4   15.90    3.30
  -3  -5   4   10.00    3.80
  -3   5   3  158.08   10.50
   3   5  -3  138.89    8.10
  -3   5   3  147.29   10.90
   3   5  -3  163.98   10.70
   3  -5  -3  155.28   10.30
   3  -5  -3  160.08   11.00
  -3  -5   3  128.29    8.70
   3  -5  -3  168.68   10.00
  -3  -5   3  166.28   11.20
   3   5  -2  310.97   15.00
  -3   5   2  321.57   15.70
  -3   5   2  312.07   15.00
   3   5  -2  296.67   13.20
  -3  -5   2  304.77   14.00
   3  -5  -2  333.87   15.80
   3  -5  -2  316.67   14.50
  -3  -5   2  313.07   15.80
  -3   5   1   39.50    7.70
  -3   5   1   35.30    5.20
  -3   5   1   49.30    5.90
   3   5  -1   32.90    5.00
   3   5  -1   45.40    5.20
   3  -5  -1   32.40    5.40
   3  -5  -1   33.60    5.00
  -3  -5   1   40.20    6.00
  -3  -5   1   38.30    5.70
  -3   5   0    1.90    2.20
  -3   5   0   -1.80    3.70
   3   5   0    3.40    2.50
  -3   5   0   -2.60    2.60
   3   5   0    5.80    2.80
   3  -5   0   -1.10    2.60
   3  -5   0   -1.60    2.40
  -3  -5   0   -2.50    2.20
  -3  -5   0    2.60    1.60
  -3  -5   0   -0.40    2.70
   3   5   1    2.30    3.00
  -3   5  -1    6.80    2.70
   3   5   1    5.60    2.80
  -3   5  -1    5.70    5.10
  -3   5  -1    2.50    2.80
  -3  -5  -1    2.40    2.20
   3  -5   1   -0.90    2.80
  -3  -5  -1    2.70    2.90
  -3  -5  -1    2.00    3.20
   3  -5   1    0.10    2.80
   3   5   2  209.48   13.00
  -3   5  -2  206.38   11.10
   3   5   2  203.48   10.40
  -3   5  -2  207.68   18.00
   3   5   2  207.38   12.30
  -3  -5  -2  209.98   12.10
   3  -5   2  200.28   11.60
   3  -5   2  197.88   11.60
  -3  -5  -2  210.78   13.40
  -3  -5  -2  204.48   10.60
   3   5   3  299.17   16.40
  -3   5  -3  344.07   14.80
   3   5   3  298.67   14.10
   3   5   3  325.97   17.00
  -3   5  -3  246.68   22.20
   3  -5   3  304.47   20.70
   3  -5   3  334.97   15.30
  -3  -5  -3  347.57   16.10
   3  -5   3  321.67   15.10
  -3  -5  -3  276.07   14.70
  -3  -5  -3  310.17   17.90
   3   5   4   27.90    4.90
  -3   5  -4   26.60    4.50
  -3   5  -4   20.50   11.40
   3   5   4   27.70    5.60
   3   5   4   25.50    5.70
   3   5   4   29.00    6.70
  -3  -5  -4   28.70    5.60
   3  -5   4   14.90    8.40
  -3  -5  -4   24.00    5.10
   3  -5   4   24.70    4.30
  -3  -5  -4   24.20    6.00
   3  -5   4   22.40    5.10
   3   5   5  421.56   21.00
   3   5   5  444.26   21.40
   3   5   5  405.26   18.50
   3   5   5  438.86   22.70
  -3   5  -5  429.26   18.70
   3  -5   5  429.66   19.40
  -3  -5  -5  411.66   19.80
   3  -5   5  432.06   26.20
  -3  -5  -5  442.86   22.90
   3  -5   5  409.36   18.60
   3  -5   5  439.76   21.70
  -3  -5  -5  425.06   20.20
   3   5   6   71.49   11.00
   3   5   6   76.29    7.90
  -3   5  -6   71.49    8.40
   3   5   6   85.09    9.80
   3  -5   6   53.49   10.60
  -3  -5  -6   81.69    9.90
  -3  -5  -6   63.69    8.80
   3  -5   6   66.59   10.00
  -3  -5  -6   55.99    8.40
   3   5   7  354.66   17.70
   3   5   7  365.06   21.60
   3   5   7  350.36   19.80
  -3   5  -7  366.26   18.00
  -3  -5  -7  371.26   20.40
  -3  -5  -7  369.96   24.70
  -3  -5  -7  319.77   21.90
   3  -5   7  348.57   29.00
   3  -5   7  397.96   22.00
   3   5   8   23.00    5.90
  -3   5  -8   20.50    5.40
   3   5   8   24.90    6.10
   3   5   8   20.40    6.90
  -3  -5  -8   23.00    6.30
  -3  -5  -8   25.10    6.30
   3  -5   8   15.80    8.50
  -3  -5  -8   13.30    6.90
   3  -5   8   23.40    7.00
  -3   5  -9  910.01   36.60
   3   5   9  931.81   41.10
   3   5   9  887.51   36.80
   3  -5   9  897.81   47.10
   3  -5   9  923.21   40.10
  -3  -5  -9  878.31   41.80
   3  -5   9  863.01   33.40
  -3  -5  -9  915.11   37.80
  -3  -5  -9  957.20   41.20
   3   5  10   30.90    9.60
  -3   5 -10   16.80    6.10
  -3  -5 -10   23.40    8.70
   3  -5  10   18.70   10.00
  -3  -5 -10   17.60    7.00
   3   5  11  102.19   19.80
  -3   5 -11  112.09   13.10
   3  -5  11  100.59   20.60
  -3  -5 -11  102.19   16.10
  -3  -5 -11  123.99   16.60
  -3   5 -12   -3.80    5.60
   3  -5  12   -8.60   10.30
  -3  -5 -12   -3.50    7.30
  -3  -5 -12   -9.00    5.60
  -3   5 -13  108.39   14.50
   3   5  13   74.79   17.90
   3  -5  13   64.29   16.50
  -3  -5 -13   72.29   13.20
  -3  -5 -13   57.19   11.70
  -3   5 -14   40.60    9.40
   3   5  14   17.50   14.50
   3  -5  14   15.00   13.80
  -3  -5 -14   46.90   12.70
  -3  -5 -14   45.80   10.60
   3  -5  14   37.10    9.60
  -3   5 -15  142.79   17.00
  -3  -5 -15   99.29   17.30
  -3  -5 -15  142.39   20.50
   3  -5  15  132.79   25.90
  -3   5 -16   -5.10    7.50
   3   5  16   12.90   13.10
   3  -5  16   -5.00   10.60
  -3  -5 -16    3.50    9.70
  -3  -5 -16   -1.30    9.30
   3   5  17   22.50   14.00
  -3   5 -17   -9.60    8.90
  -3  -5 -17  -14.00   10.80
   3  -5  17   -3.60   11.80
  -3  -5 -17  -16.60    8.50
   3   6 -19   34.90   11.60
   3   6 -19   36.80   12.60
   3  -6 -19   32.20   13.50
   3   6 -18   26.30   13.50
   3   6 -18    9.20    9.40
  -3   6  18  -11.20   13.10
   3  -6 -18   18.80   12.50
   3  -6 -18    2.00   10.30
  -3  -6  18   -4.20    7.40
   3   6 -17   48.70   11.40
  -3   6  17   28.60   15.20
   3   6 -17   59.79   12.50
   3  -6 -17   46.00   12.90
   3  -6 -17   37.70   11.60
  -3   6  16   25.70   14.50
   3   6 -16   27.00   10.40
   3   6 -16   16.20    8.60
   3  -6 -16    8.70   10.00
  -3  -6  16   12.00    6.20
   3  -6 -16   18.30   10.50
   3   6 -15   40.00    9.40
   3   6 -15   46.90   10.30
  -3  -6  15   28.20    6.60
   3  -6 -15   24.50   11.00
   3  -6 -15   19.40   10.20
   3   6 -14   48.70    9.70
   3   6 -14   44.90    9.80
   3  -6 -14   26.50   10.50
  -3   6  13   30.00    8.90
   3  -6 -13   22.40    9.20
   3  -6 -13   28.00    9.60
   3   6 -12   33.80    8.80
  -3   6  12   12.40    8.70
   3  -6 -12   19.70    8.60
  -3  -6  12   39.30    9.20
   3  -6 -12   22.90    9.70
   3   6 -11  576.34   28.80
  -3   6  11  515.75   27.80
   3  -6 -11  560.64   31.80
  -3  -6  11  538.65   28.60
   3  -6 -11  537.45   30.40
   3   6 -10   22.70    7.70
  -3   6  10   60.39   10.40
   3  -6 -10   43.40    8.80
  -3  -6  10   35.40    7.90
   3  -6 -10   47.10    9.00
  -3   6   9  273.67   15.40
   3   6  -9  297.27   24.20
   3   6  -9  304.77   18.50
  -3   6   9  260.37   16.80
   3  -6  -9  282.67   20.20
  -3  -6   9  247.58   17.10
   3  -6  -9  293.27   19.60
   3  -6  -9  272.47   17.60
  -3   6   8  152.78   12.50
   3   6  -8  170.58   17.40
   3   6  -8  155.58   13.60
  -3   6   8  138.29   12.40
  -3   6   8  161.38   11.00
   3  -6  -8  156.68   13.90
   3  -6  -8  157.68   12.90
  -3  -6   8  170.98   13.80
   3  -6  -8  170.28   16.50
  -3  -6   8  147.29   12.20
   3   6  -7   86.49   10.00
  -3   6   7   81.99    9.10
  -3   6   7   77.99    8.00
  -3   6   7   83.69    9.70
   3   6  -7   79.29   13.10
   3  -6  -7   74.19   10.30
   3  -6  -7   81.19   11.10
   3  -6  -7   52.89    9.10
  -3  -6   7   80.69   11.80
  -3  -6   7   93.99    9.70
  -3   6   6   -3.80    3.10
   3   6  -6   -0.90    3.70
   3   6  -6    4.40    5.50
  -3  -6   6   -3.60    3.70
   3  -6  -6    5.60    4.40
   3  -6  -6   -0.50    3.40
   3  -6  -6   -1.00    4.10
  -3  -6   6    1.80    2.10
  -3  -6   6   -5.00    3.40
   3   6  -5 1486.55   54.59
  -3   6   5 1521.95   54.99
  -3  -6   5 1582.54   53.29
   3  -6  -5 1573.04   54.89
   3  -6  -5 1616.74   55.49
  -3  -6   5 1594.74   56.59
  -3  -6   5 1564.94   51.19
   3  -6  -5 1623.64   57.29
  -3   6   4  304.47   18.30
  -3   6   4  344.97   17.40
   3   6  -4  310.37   14.50
   3   6  -4  332.47   17.20
   3  -6  -4  345.47   17.20
   3  -6  -4  361.66   18.90
  -3  -6   4  359.96   18.00
   3  -6  -4  322.87   17.60
  -3  -6   4  332.77   15.00
  -3  -6   4  339.67   18.70
   3   6  -3 1536.95   53.49
  -3   6   3 1563.74   53.89
   3   6  -3 1508.25   51.49
  -3   6   3 1573.84   55.09
  -3  -6   3 1520.95   54.89
   3  -6  -3 1626.14   55.19
   3  -6  -3 1554.74   53.19
  -3  -6   3 1512.75   51.59
   3  -6  -3 1540.75   53.49
   3   6  -2   39.60    5.00
  -3   6   2   44.60    7.00
   3   6  -2   64.79    8.20
  -3  -6   2   34.70    5.60
   3  -6  -2   43.10    7.20
  -3  -6   2   40.70    6.60
  -3   6   1   73.79    7.80
   3   6  -1   51.69    6.60
   3   6  -1   59.99    8.00
  -3   6   1   35.80    8.10
  -3   6   1   50.59    7.00
  -3  -6   1   65.29    8.70
   3  -6  -1   58.79    8.40
   3  -6  -1   58.89    7.30
  -3  -6   1   36.30    5.80
   3   6   0   20.80    4.30
  -3   6   0   14.00    4.80
  -3   6   0   14.10    3.80
   3   6   0   14.70    4.70
   3  -6   0   17.30    4.60
  -3  -6   0   11.80    4.40
  -3  -6   0   11.30    3.40
   3  -6   0   10.50    4.30
  -3  -6   0   14.70    4.90
  -3   6  -1 1971.00   65.39
  -3   6  -1 1964.30   65.99
  -3   6  -1 1911.21   71.49
   3   6   1 1976.90   67.19
   3   6   1 1971.60   65.79
   3  -6   1 2012.70   65.69
  -3  -6  -1 1989.00   67.29
   3  -6   1 2004.70   65.99
  -3  -6  -1 1944.11   63.49
  -3   6  -2   19.90    4.80
  -3   6  -2   12.00    8.10
   3   6   2   18.90    5.50
   3   6   2   21.70    4.60
  -3  -6  -2   20.50    4.10
  -3  -6  -2   15.70    5.00
   3  -6   2   19.20    5.00
   3  -6   2   11.60    4.40
  -3  -6  -2   19.60    4.90
  -3   6  -3 2025.10   66.19
   3   6   3 2017.70   65.39
   3   6   3 1989.60   69.29
   3   6   3 1984.50   68.19
  -3   6  -3 1939.11   75.49
   3  -6   3 2061.29   67.59
  -3  -6  -3 1925.21   67.59
   3  -6   3 2020.50   66.59
  -3  -6  -3 2065.59   70.39
  -3  -6  -3 2006.80   66.19
   3   6   4   15.80    5.40
   3   6   4    9.60    4.40
   3   6   4    9.70    5.20
  -3   6  -4    2.70    8.70
  -3   6  -4   13.10    4.00
   3   6   4   15.50    4.10
  -3  -6  -4    7.60    5.30
  -3  -6  -4    9.70    4.20
   3  -6   4   18.00    4.70
   3  -6   4   10.20    4.10
  -3  -6  -4   21.90    4.60
   3   6   5  366.96   20.70
   3   6   5  392.56   17.90
  -3   6  -5  389.46   18.30
   3   6   5  413.66   22.60
   3   6   5  403.96   22.50
  -3  -6  -5  354.56   21.70
  -3  -6  -5  397.56   20.20
   3  -6   5  378.16   17.80
   3  -6   5  392.36   21.30
  -3  -6  -5  389.26   19.40
   3  -6   5  374.46   19.20
   3  -6   5  361.56   25.50
   3   6   6   86.49   10.70
   3   6   6   78.29   11.90
   3   6   6   73.29    8.60
  -3   6  -6   71.19    8.90
   3  -6   6   80.39    9.00
   3  -6   6   68.49    9.40
  -3  -6  -6   69.59    9.50
   3  -6   6   53.99   18.60
   3  -6   6   70.59   11.10
  -3  -6  -6   80.89    9.70
   3   6   7  412.86   20.20
   3   6   7  429.06   23.00
  -3   6  -7  420.06   20.50
   3   6   7  451.35   25.00
   3  -6   7  441.06   20.20
   3  -6   7  426.06   23.50
  -3  -6  -7  401.86   21.60
   3  -6   7  424.46   29.40
  -3  -6  -7  405.86   24.70
  -3  -6  -7  441.26   23.10
   3   6   8   27.50    7.50
   3   6   8   22.10    4.70
  -3   6  -8    6.00    5.60
  -3  -6  -8   15.40    7.20
  -3  -6  -8   14.90    5.90
  -3  -6  -8   16.50    6.50
   3  -6   8   23.40   10.10
   3  -6   8    4.70    6.30
   3   6   9  403.16   25.00
  -3   6  -9  384.76   21.40
   3   6   9  376.26   20.60
   3  -6   9  399.06   31.50
  -3  -6  -9  424.56   24.80
  -3  -6  -9  410.86   27.00
  -3   6 -10   58.79   10.40
   3   6  10   54.79   11.60
  -3  -6 -10   39.10   10.10
  -3  -6 -10   67.69   11.80
   3  -6  10   54.29   14.20
   3   6  11  164.78   34.30
  -3   6 -11  169.48   15.60
  -3  -6 -11  178.38   20.60
  -3  -6 -11  168.58   19.30
   3  -6  11  166.08   24.60
   3   6  12   40.50   14.00
  -3   6 -12   52.29    9.70
   3  -6  12   60.49   15.20
  -3  -6 -12   49.60   11.60
  -3   6 -13   11.50    7.40
   3   6  13   -2.30   13.60
  -3  -6 -13   10.60    9.60
   3  -6  13    3.40   12.00
  -3   6 -14    7.90    7.40
   3   6  14  -21.00   13.80
  -3  -6 -14  -10.60    8.20
   3  -6  14  -14.40   10.10
   3   6  15  -15.90   14.00
  -3   6 -15   -4.10    7.50
  -3  -6 -15  -17.90    8.70
  -3  -6 -15   -8.60    8.50
   3  -6  15   -3.70   13.10
   3   6  16   46.50   17.30
  -3   6 -16   61.49   11.80
  -3  -6 -16   57.19   15.50
   3  -6  16   39.50   16.30
  -3  -6 -16   81.69   14.60
   3   6  17   -3.10   12.70
  -3  -6 -17   -3.70    9.80
  -3  -6 -17  -11.00   10.30
   3   7 -18    0.50    9.00
   3  -7 -18   -5.80   11.60
   3  -7 -18   -1.50    9.20
  -3  -7  18   -1.90    8.40
  -3   7  17   92.39   21.20
   3   7 -17   92.19   15.90
   3  -7 -17  160.58   23.90
   3  -7 -17  153.58   23.20
  -3  -7  17  120.89   13.40
  -3   7  16    7.10   12.80
   3   7 -16  -10.40    8.30
   3  -7 -16   -8.80    8.70
   3  -7 -16   -8.60    9.10
  -3  -7  16   -2.20    5.90
  -3   7  15   10.50    9.80
   3   7 -15    1.20    7.80
   3  -7 -15   -0.40    9.30
   3  -7 -15  -13.50    7.50
  -3  -7  15   -3.40    4.90
   3   7 -14   24.90    7.60
  -3   7  14   12.50    9.20
   3  -7 -14   10.50   10.40
   3  -7 -14   19.70   10.30
  -3   7  13   90.19   18.60
   3  -7 -13  132.69   18.40
   3  -7 -13   93.39   14.80
   3   7 -12   38.30    8.70
   3  -7 -12   27.10    9.60
   3  -7 -12   37.00    9.90
  -3   7  11  278.77   18.90
   3   7 -11  268.17   20.20
   3  -7 -11  288.07   22.50
   3  -7 -11  289.27   23.50
  -3  -7  11  225.38   19.10
  -3   7  10   25.00    6.40
   3   7 -10   15.90    6.90
   3  -7 -10   24.90    8.70
  -3  -7  10   21.40    8.40
   3  -7 -10   10.10    7.70
  -3   7   9   36.10    7.50
  -3   7   9   65.19    8.90
   3   7  -9   52.99    9.60
   3  -7  -9   53.09   10.00
   3  -7  -9   57.09    9.70
  -3  -7   9   52.89    9.20
  -3   7   8  225.68   14.00
   3   7  -8  201.08   15.50
  -3  -7   8  229.78   16.80
   3  -7  -8  202.68   18.30
   3  -7  -8  249.97   17.10
   3  -7  -8  238.88   22.70
  -3  -7   8  198.58   15.30
   3   7  -7   16.50    6.30
   3   7  -7   14.40    5.70
  -3   7   7    8.70    4.20
  -3   7   7   11.40    4.80
   3  -7  -7   12.80    5.30
   3  -7  -7    8.70    6.30
  -3  -7   7    0.50    3.40
   3  -7  -7   11.50    5.10
  -3  -7   7    8.10    5.20
  -3  -7   7    6.00    5.00
  -3   7   6  122.89   11.90
   3   7  -6  153.48   13.10
   3  -7  -6  139.99   12.50
   3  -7  -6  121.19   16.80
  -3  -7   6  139.59    9.00
  -3  -7   6  147.49   11.30
  -3  -7   6  137.29   12.50
   3  -7  -6  138.49   11.60
   3   7  -5   72.89    9.70
  -3   7   5   58.59    9.60
   3   7  -5   36.90    5.20
  -3   7   5   63.29   10.10
   3  -7  -5   49.10    7.40
   3  -7  -5   47.70    7.90
  -3  -7   5   49.40    7.80
   3   7  -4   60.99    9.00
  -3   7   4   41.10    6.60
  -3   7   4   46.90    7.70
   3   7  -4   43.00    6.10
   3  -7  -4   56.39    8.20
  -3  -7   4   50.19    7.40
  -3  -7   4   34.20    6.80
   3  -7  -4   37.00    7.30
  -3  -7   4   40.00    5.90
   3  -7  -4   40.90    6.80
   3   7  -3  199.08   13.40
  -3   7   3  196.98   14.80
   3   7  -3  193.18   11.40
  -3   7   3  189.08   13.30
   3  -7  -3  178.28   13.60
  -3  -7   3  219.88   12.60
   3  -7  -3  248.58   15.70
   3  -7  -3  207.88   13.10
  -3  -7   3  179.88   14.30
  -3   7   2  829.62   34.00
   3   7  -2  832.82   31.00
  -3   7   2  836.42   33.00
   3   7  -2  840.52   33.10
   3  -7  -2  814.02   32.00
  -3  -7   2  810.82   34.00
  -3  -7   2  810.62   32.00
   3  -7  -2  894.71   34.50
   3   7  -1   93.09    8.60
  -3   7   1   84.59   12.20
   3   7  -1   83.39   10.20
  -3   7   1   81.09   10.10
  -3   7   1  102.79    9.20
   3  -7  -1   89.29    8.90
   3  -7  -1   97.59   10.20
  -3  -7   1   72.19    9.70
  -3   7   0   67.29    9.10
  -3   7   0   68.59   11.90
   3   7   0   91.19    8.40
  -3   7   0   63.99    8.20
   3   7   0   62.49    8.70
  -3  -7   0   59.89    9.50
  -3  -7   0   78.99    7.10
  -3  -7   0   64.79    9.70
   3  -7   0   73.79    8.70
   3  -7   0   73.69    9.50
   3   7   1    1.20    5.10
  -3   7  -1    3.00    6.00
  -3   7  -1    6.50    4.60
   3   7   1    6.60    3.60
  -3   7  -1    5.60    3.90
  -3  -7  -1    6.60    4.90
  -3  -7  -1   14.60    3.60
  -3  -7  -1    2.30    4.30
   3  -7   1    0.30    3.80
   3  -7   1   11.40    4.60
  -3   7  -2  563.74   30.50
  -3   7  -2  539.95   23.10
   3   7   2  474.35   24.70
   3   7   2  527.45   23.30
  -3   7  -2  516.25   23.00
  -3  -7  -2  528.65   25.40
  -3  -7  -2  562.54   21.90
   3  -7   2  536.45   23.70
   3  -7   2  549.05   23.70
  -3  -7  -2  520.05   24.60
  -3   7  -3    3.70    3.80
  -3   7  -3   -3.70    6.20
   3   7   3   -4.30    4.40
   3   7   3    8.30    3.40
  -3  -7  -3    9.00    3.50
  -3  -7  -3   -4.40    5.90
  -3  -7  -3    3.00    4.10
   3  -7   3    0.30    3.60
   3   7   4 1440.96   54.49
  -3   7  -4 1108.49   70.59
  -3   7  -4 1308.77   46.60
   3   7   4 1324.27   54.69
  -3  -7  -4 1201.58   47.90
   3  -7   4 1398.76   48.80
   3  -7   4 1378.36   47.30
  -3  -7  -4 1333.27   47.50
  -3  -7  -4 1327.77   51.69
  -3   7  -5   -7.00    7.90
   3   7   5    6.20    6.50
  -3   7  -5    7.70    4.80
   3   7   5   12.70    4.70
   3   7   5    7.20    6.10
   3   7   5   12.20    4.50
  -3  -7  -5    7.50    4.30
   3  -7   5    5.10    4.80
   3  -7   5    0.40    5.30
   3  -7   5    9.70    4.10
  -3  -7  -5    1.50    6.00
  -3  -7  -5    6.40    4.60
   3   7   6  139.49   11.00
   3   7   6  104.69   12.20
   3   7   6  100.09   14.00
  -3   7  -6  118.19   11.90
   3   7   6  153.38   15.30
   3  -7   6  119.89   12.60
   3  -7   6  149.79   11.50
  -3  -7  -6   97.99   12.20
  -3  -7  -6  144.99   12.70
   3  -7   6  128.49   14.80
  -3  -7  -6  130.69   15.10
  -3   7  -7    1.10    5.20
   3   7   7   16.40    6.20
   3   7   7   19.40    7.30
   3  -7   7   14.60    4.60
  -3  -7  -7   10.20    6.20
   3  -7   7   11.20    7.00
  -3  -7  -7   15.10    6.40
   3  -7   7   11.10    5.40
   3   7   8  176.68   14.20
   3   7   8  206.98   18.30
  -3   7  -8  164.08   14.30
   3  -7   8  194.78   13.50
  -3  -7  -8  210.78   19.30
  -3  -7  -8  179.48   18.70
   3  -7   8  151.08   17.90
   3   7   9    1.80    7.30
   3   7   9    4.80    6.20
  -3   7  -9   11.80    5.90
  -3  -7  -9    8.60    7.70
   3  -7   9   12.60    5.40
  -3  -7  -9    3.40    7.50
  -3   7 -10   19.90    6.50
   3   7  10    8.40    9.30
   3  -7  10    9.20    5.90
  -3  -7 -10   10.00    8.30
   3  -7  10   15.40    5.30
  -3  -7 -10    6.80    7.90
  -3   7 -11   14.40    6.60
   3   7  11   -8.60    8.90
  -3  -7 -11   -2.40    8.00
  -3  -7 -11   -4.80    9.30
   3   7  12   55.79   14.30
  -3   7 -12   95.69   14.00
  -3  -7 -12   35.90   12.40
  -3  -7 -12   70.39   13.20
  -3   7 -13   13.50    7.20
   3   7  13    7.70   13.20
  -3  -7 -13   -4.00    9.10
  -3   7 -14   -8.90    7.00
  -3  -7 -14  -12.20    8.50
  -3   7 -15  -10.60    7.40
   3   7  15  -26.80   15.70
  -3  -7 -15  -22.20   15.10
  -3  -7 -15    8.90   10.00
   3   7  16  -13.30   14.90
  -3   7 -16   34.40   10.40
  -3  -7 -16   23.20   13.30
  -3  -7 -16    9.00   10.70
  -3   8  17  -22.70   14.20
   3   8 -17   -9.00    7.90
   3  -8 -17    3.00    9.00
   3  -8 -17   -7.70   10.80
   3   8 -16  -14.60   13.40
   3  -8 -16  -12.10   10.60
   3   8 -15   19.80   10.50
  -3   8  15   11.00    9.40
   3  -8 -15   32.80   15.40
   3  -8 -15    4.70   18.90
  -3   8  14   19.90   10.00
   3   8 -14   19.80    8.70
   3  -8 -14   12.00   10.70
   3  -8 -14    5.80   10.40
   3   8 -13   15.70    6.50
   3  -8 -13   -6.10    8.50
   3  -8 -13   -4.30    7.00
  -3   8  12   22.80   10.80
   3   8 -12   49.40    9.30
   3  -8 -12   49.70   11.40
   3  -8 -12   35.50   10.50
   3   8 -11   10.70    6.40
  -3  -8  11    9.30    8.40
   3  -8 -11   -1.00    7.60
   3  -8 -11    4.80    7.90
   3   8 -10   -9.90    5.60
  -3   8  10   -7.40    4.50
   3  -8 -10  -11.50    6.20
   3   8  -9   51.59    9.00
   3  -8  -9   61.99   11.50
   3  -8  -9   77.69   11.20
  -3  -8   9   61.29    9.90
  -3   8   8   77.59   10.20
   3   8  -8   57.79    9.30
   3  -8  -8   54.89   10.70
  -3  -8   8   64.89    9.10
  -3  -8   8   62.49    8.00
   3  -8  -8   89.59   13.20
  -3   8   7   22.90    6.10
   3   8  -7   19.50    6.80
  -3  -8   7   19.70    4.50
   3  -8  -7   34.00    7.90
   3  -8  -7   16.00    7.70
  -3  -8   7   16.80    6.00
   3   8  -6   43.70   13.10
  -3   8   6   22.20    7.90
   3   8  -6   24.90    6.70
  -3  -8   6   28.70    7.80
  -3  -8   6   19.30    5.50
  -3  -8   6   21.30    4.80
   3  -8  -6   26.80    6.40
   3  -8  -6   34.30    9.80
   3  -8  -6   15.90    7.30
   3   8  -5    0.60    3.10
  -3   8   5    3.50    5.40
  -3   8   5   -3.60    4.10
   3   8  -5   -0.50    3.80
   3  -8  -5   -5.60    4.80
   3  -8  -5    2.30    4.20
  -3  -8   5   11.00    5.40
  -3  -8   5    0.50    4.30
   3  -8  -5    0.30    4.40
  -3  -8   5   -6.40    3.10
  -3   8   4    1.10    3.90
   3   8  -4   -3.80    2.90
   3   8  -4    6.30    4.50
  -3   8   4    3.70    6.80
  -3  -8   4    3.20    4.60
   3  -8  -4   -9.10    4.60
   3  -8  -4   11.00    5.40
   3  -8  -4   -1.50    3.50
  -3  -8   4    1.70    3.80
   3   8  -3   17.00    8.30
  -3   8   3   13.10    5.00
   3   8  -3   12.90    3.70
  -3   8   3   13.50    5.50
   3  -8  -3   19.40    5.50
  -3  -8   3   16.60    5.00
   3  -8  -3   12.90    6.00
  -3  -8   3    9.50    5.10
   3  -8  -3   17.90    5.10
   3   8  -2   19.50    4.00
  -3   8   2   17.60    6.20
  -3   8   2   16.80    6.20
  -3  -8   2   15.80    5.30
   3  -8  -2   13.80    7.30
  -3  -8   2   17.70    5.40
   3  -8  -2   13.70    5.80
   3   8  -1    4.20    3.30
  -3   8   1    8.50    5.80
  -3   8   1    5.30    3.70
  -3   8   1   -4.10    4.20
   3  -8  -1    0.10    3.50
   3  -8  -1   -4.20    4.30
  -3  -8   1   -3.80    3.90
  -3  -8   1   -7.80    4.40
   3   8   0   60.49    7.90
  -3   8   0   37.20    7.30
  -3   8   0   61.89   11.20
   3   8   0   19.50   10.60
  -3   8   0   35.60    6.10
  -3  -8   0   39.60    7.50
  -3  -8   0   25.90    6.90
   3  -8   0   36.40    6.30
   3  -8   0   43.50    7.30
  -3  -8   0   41.60    5.90
  -3   8  -1  234.68   15.50
  -3   8  -1  235.58   14.90
   3   8   1  260.47   14.90
   3   8   1  251.07   18.90
  -3   8  -1  285.47   21.00
   3  -8   1  220.68   16.10
  -3  -8  -1  238.98   17.00
  -3  -8  -1  231.28   15.90
  -3  -8  -1  255.47   13.60
   3  -8   1  254.07   15.50
  -3   8  -2  102.29   11.20
  -3   8  -2   99.59   10.30
   3   8   2  114.39   11.60
   3   8   2   76.49   12.40
  -3   8  -2  109.29   17.20
  -3  -8  -2   93.49   12.20
   3  -8   2  115.59   11.90
   3  -8   2   96.09   10.70
  -3  -8  -2  107.69    9.80
  -3  -8  -2   80.99   10.70
   3   8   3   19.60    5.20
  -3   8  -3   19.00    5.80
  -3   8  -3   24.00    9.90
   3   8   3   20.90    7.10
   3  -8   3   17.40    5.90
  -3  -8  -3   13.40    6.00
   3  -8   3   22.70    6.10
  -3  -8  -3   29.50    8.30
  -3  -8  -3   31.30    5.90
  -3   8  -4   78.79   10.30
   3   8   4   82.49   10.70
  -3  -8  -4   94.69   13.40
   3  -8   4   94.19   10.50
   3  -8   4   86.49   11.20
  -3  -8  -4   62.09   10.50
  -3  -8  -4   84.49   10.60
  -3   8  -5  273.27   17.20
   3   8   5  278.47   20.90
  -3   8  -5  237.48   30.40
   3   8   5  343.67   22.00
   3   8   5  322.07   20.60
  -3  -8  -5  316.27   18.50
  -3  -8  -5  324.97   22.40
   3  -8   5  317.17   17.40
   3  -8   5  305.67   20.50
   3   8   6   -7.00    5.70
   3   8   6   -3.70    4.10
   3   8   6   11.60    7.10
  -3   8  -6   -3.90    5.10
  -3  -8  -6   -6.90    5.90
   3  -8   6    8.70    5.70
   3  -8   6   -6.20    6.20
   3  -8   6    0.30    4.20
  -3  -8  -6    1.70    6.10
   3   8   7    6.70    6.90
   3   8   7    7.30    4.70
  -3   8  -7    3.80    6.50
  -3  -8  -7   -0.20    8.20
  -3  -8  -7    0.50    7.00
   3  -8   7    5.90    5.00
   3  -8   7   -6.70    5.10
   3  -8   7    4.20    7.40
  -3   8  -8   93.69   12.70
   3   8   8   86.69   12.60
   3   8   8   71.59   12.90
  -3  -8  -8   78.09   13.00
   3  -8   8   99.69   12.10
  -3  -8  -8   71.89   11.60
   3   8   9   42.10   13.70
  -3   8  -9   73.99   12.20
  -3  -8  -9   40.90   11.40
   3  -8   9   67.19   11.10
  -3  -8  -9   43.80   10.80
   3   8  10  104.69   18.90
  -3   8 -10  117.69   13.80
  -3  -8 -10   80.99   15.40
  -3  -8 -10   92.39   15.60
   3  -8  10   89.79   12.50
  -3   8 -11   94.59   13.70
   3   8  11   83.49   17.90
  -3  -8 -11   71.69   14.60
  -3  -8 -11   67.59   13.30
   3  -8  11   73.19   12.20
   3  -8  11   75.79   13.10
   3   8  12   34.10   12.00
  -3   8 -12   55.09    9.60
  -3  -8 -12   50.39   12.90
  -3  -8 -12   54.89   13.30
   3  -8  12   46.90    7.80
   3   8  13    5.30   12.20
  -3   8 -13   12.90    7.60
   3  -8  13   31.00    7.30
  -3  -8 -13    9.90   10.60
  -3   8 -14   37.80   10.10
   3   8  14    3.90   16.80
  -3  -8 -14   29.60   13.30
  -3   8 -15   12.60    8.60
  -3  -8 -15   -6.70   11.40
   3  -8  15   -6.10    6.90
  -3   8 -16  155.18   19.30
   3  -8  16  166.68   17.70
  -3  -8 -16  119.09   21.30
  -3  -8 -16  107.29   20.20
  -3   9  16   37.20   12.40
   3   9 -16   25.30   10.50
   3  -9 -16   12.70   12.80
   3  -9 -16   31.30   14.10
   3   9 -15   22.60   17.80
  -3   9  15   34.50   11.90
   3  -9 -15    9.00   11.00
   3  -9 -15   27.30   13.10
   3   9 -14   -9.40    7.40
   3  -9 -14  -13.50    9.00
   3  -9 -14   -5.20   10.00
  -3   9  13   -3.20   10.50
   3   9 -13   22.20    8.70
   3  -9 -13   34.40   12.10
   3  -9 -13   13.90   10.50
   3   9 -12   19.80    7.20
   3  -9 -12    9.90    8.70
   3  -9 -12   16.00    9.40
  -3   9  11  169.58   17.00
   3   9 -11  218.08   18.30
   3  -9 -11  189.08   21.50
   3  -9 -11  159.78   22.00
   3   9 -10    8.30    6.70
  -3  -9  10   -9.70    7.60
   3  -9 -10  -10.50    7.50
   3  -9 -10   -8.20    7.00
   3   9  -9   55.19   10.40
  -3   9   9   57.39   11.90
   3  -9  -9   44.90   11.00
  -3  -9   9   66.79    8.40
   3  -9  -9   62.29   11.10
  -3  -9   9   55.39   11.00
   3   9  -8   39.70    9.00
  -3   9   8   44.00    8.40
  -3  -9   8   54.79    8.70
   3  -9  -8   36.90    9.20
  -3  -9   8   39.30    8.40
   3   9  -7   53.89    9.10
   3  -9  -7   60.59    9.90
  -3  -9   7   54.69    9.30
  -3  -9   7   77.09    9.20
   3  -9  -7   44.60   12.10
   3   9  -6  397.16   22.60
  -3  -9   6  432.96   20.30
  -3  -9   6  388.76   21.40
   3  -9  -6  436.86   24.00
   3  -9  -6  371.96   26.30
   3   9  -5  221.48   16.50
  -3   9   5  191.38   18.50
   3   9  -5  202.98   14.00
   3  -9  -5  209.48   19.70
  -3  -9   5  236.48   15.60
   3  -9  -5  252.27   17.70
  -3  -9   5  250.87   15.90
   3   9  -4   73.09   11.40
  -3   9   4   58.89   10.80
   3   9  -4   82.99    8.70
  -3  -9   4   88.69   10.60
   3  -9  -4   82.79   13.10
   3  -9  -4   47.60   10.40
   3   9  -3   38.70    7.80
  -3   9   3   29.00    7.70
   3   9  -3   50.29    8.10
  -3   9   3   36.10    7.50
   3  -9  -3   29.30    8.40
  -3  -9   3   46.20    7.70
   3  -9  -3   61.39    9.90
   3  -9  -3   33.90    6.90
   3   9  -2   89.19   12.00
  -3   9   2   89.19   11.80
  -3   9   2   90.79   13.10
   3   9  -2   98.99   10.20
  -3   9   2  109.39   14.50
  -3  -9   2   57.79   12.20
   3  -9  -2   96.19   10.60
   3  -9  -2   73.89   11.10
  -3  -9   2   91.69   11.80
  -3   9   1   -1.10    4.60
   3   9  -1    5.80    4.60
  -3   9   1    1.60    6.70
   3   9  -1    7.00    4.90
  -3   9   1    4.30    6.30
   3  -9  -1    1.50    5.60
  -3  -9   1   -4.70    4.90
   3  -9  -1    8.30    5.20
  -3  -9   1   -9.40    6.80
   3   9   0  370.66   21.10
  -3   9   0  324.57   19.50
  -3   9   0  362.76   25.30
  -3   9   0  360.26   22.20
   3   9   0  336.67   19.20
   3  -9   0  358.66   19.70
  -3  -9   0  323.77   21.00
   3  -9   0  314.07   26.90
  -3  -9   0  318.17   17.40
   3   9   1   14.20    5.80
  -3   9  -1   21.40    8.20
  -3   9  -1   20.70    8.00
   3   9   1   11.90    5.00
  -3  -9  -1    4.00    5.20
  -3  -9  -1    5.70    6.20
   3  -9   1    7.20    5.10
   3  -9   1   13.50    6.00
   3   9   2  449.76   25.10
  -3   9  -2  414.26   28.30
  -3   9  -2  413.56   26.80
   3   9   2  444.56   23.20
  -3   9  -2  403.46   30.00
   3  -9   2  477.15   23.60
   3  -9   2  464.65   23.30
  -3  -9  -2  424.26   26.00
  -3  -9  -2  444.66   21.50
  -3   9  -3   -0.20    9.20
   3   9   3   -6.00    4.90
   3   9   3   -1.00    6.30
  -3   9  -3    7.40    6.20
   3  -9   3   11.70    5.60
   3  -9   3   -7.20    4.80
  -3  -9  -3  -12.40    6.10
   3   9   4   -5.30    6.20
  -3   9  -4    6.40    5.60
   3  -9   4    3.60    6.20
  -3  -9  -4    0.40    6.50
   3  -9   4   12.50    5.90
  -3  -9  -4   -5.70    5.50
  -3   9  -5   10.90    6.30
   3   9   5   12.70    7.60
   3  -9   5   13.20    7.00
  -3  -9  -5   13.50    7.50
  -3  -9  -5   -3.00    6.70
   3  -9   5   10.30    6.00
   3   9   6    8.30    9.10
  -3   9  -6    3.20    5.70
   3   9   6    9.20    7.50
  -3  -9  -6   -4.60    7.80
   3  -9   6    1.20    8.90
   3  -9   6   -1.60    5.30
  -3  -9  -6   -8.00    6.40
  -3   9  -7  177.98   15.90
  -3  -9  -7  127.09   21.00
  -3  -9  -7  161.88   17.80
   3  -9   7  190.48   15.30
  -3   9  -8   18.30    7.00
   3   9   8   -3.80    9.10
  -3  -9  -8   -2.30    8.20
  -3  -9  -8   -4.60    8.40
   3  -9   8   13.30    6.30
  -3   9  -9  146.79   15.20
   3   9   9  132.39   19.90
   3  -9   9  159.48   17.10
  -3  -9  -9  128.69   18.40
  -3   9 -10   10.70    7.10
   3   9  10    5.90    8.30
   3  -9  10    8.30    9.40
  -3  -9 -10    2.40    9.40
  -3  -9 -10    4.80    8.20
   3   9  11  -10.30    7.40
  -3   9 -11   -0.80    6.40
   3  -9  11    0.20    5.40
  -3  -9 -11    1.70    9.20
   3   9  12   -1.70    9.90
  -3   9 -12   -2.00    7.60
   3  -9  12    8.50    6.40
  -3  -9 -12    7.10    9.10
  -3   9 -13  206.88   19.60
   3   9  13  165.28   26.80
  -3  -9 -13  205.68   28.20
   3  -9  13  212.08   17.40
  -3  -9 -13  168.78   24.00
  -3   9 -14   14.50    8.90
   3   9  14   -4.60   14.00
   3  -9  14   11.80    7.60
  -3   9 -15   82.09   13.20
  -3  -9 -15   65.19   17.70
   3  10 -15   51.09   12.00
   3 -10 -15   51.59   14.10
   3 -10 -15   34.00   13.60
   3  10 -14  344.87   28.60
   3 -10 -14  400.06   33.50
   3 -10 -14  362.16   34.20
  -3  10  13   52.39   13.80
   3  10 -13   77.59   13.00
   3 -10 -13   75.69   15.10
   3 -10 -13   75.69   15.40
   3  10 -12    0.90    7.70
   3 -10 -12    6.20   10.60
   3 -10 -12   -5.50    8.90
   3  10 -11    7.70    6.70
  -3  10  11  -11.40    7.10
   3 -10 -11   -4.80    9.20
  -3 -10  11    4.60    4.70
   3 -10 -11    0.50    9.50
  -3  10  10  133.29   17.30
   3  10 -10  199.08   18.60
  -3 -10  10  197.68   13.60
   3 -10 -10  193.88   21.00
   3 -10 -10  160.28   22.60
  -3 -10  10  160.28   20.30
  -3  10   9  -11.30    7.40
   3  10  -9   17.30    6.90
  -3 -10   9    4.50    8.80
   3 -10  -9   -2.10    8.90
  -3 -10   9   18.90    5.70
   3 -10  -9    5.70    8.50
  -3  10   8  433.96   26.40
   3  10  -8  421.46   25.00
   3 -10  -8  400.16   30.50
  -3 -10   8  418.76   22.30
  -3 -10   8  473.15   36.00
   3 -10  -8  440.36   27.10
   3  10  -7  137.89   15.40
   3 -10  -7  146.59   17.00
  -3 -10   7  134.69   16.50
  -3 -10   7  120.39   13.60
  -3  10   6  121.59   17.70
   3  10  -6  157.68   15.60
   3 -10  -6  123.99   15.80
  -3 -10   6  142.19   14.40
  -3 -10   6  126.19   13.90
  -3  10   5   83.69   13.50
   3  10  -5  135.19   14.90
   3 -10  -5  124.09   17.40
  -3 -10   5  129.39   13.90
  -3 -10   5  141.19   13.50
   3 -10  -5  134.29   16.30
  -3  10   4   79.89   13.00
   3  10  -4  132.69   14.90
   3  10  -4  103.79   11.30
   3 -10  -4  128.29   17.80
   3 -10  -4  127.79   15.20
  -3 -10   4  134.19   14.60
   3  10  -3    4.70    4.80
   3  10  -3    6.70    6.50
  -3  10   3   -0.30    6.90
  -3  10   3   -3.50    8.30
  -3 -10   3   -7.60    5.60
   3 -10  -3   -3.30    6.80
   3 -10  -3   10.60    6.40
  -3  10   2  191.48   18.20
  -3  10   2  209.38   30.90
   3  10  -2  168.88   15.00
   3  10  -2  206.38   17.70
  -3 -10   2  173.58   17.40
   3 -10  -2  201.18   19.50
   3 -10  -2  220.68   16.50
   3  10  -1   47.40    7.90
   3  10  -1   88.39   13.70
  -3  10   1   55.19   10.80
  -3  10   1   48.40    9.50
   3 -10  -1   60.59    9.90
  -3 -10   1   44.80   10.20
  -3 -10   1   32.40    7.90
   3  10   0   35.10    7.00
  -3 -10   0   13.60    7.50
  -3 -10   0   39.80   10.00
  -3  10  -1  256.17   19.10
  -3  10  -1  311.17   25.30
   3  10   1  260.87   20.40
  -3  10  -1  289.97   19.70
   3  10   1  246.28   18.90
   3 -10   1  295.47   20.50
  -3 -10  -1  262.37   21.90
  -3 -10  -1  233.98   17.70
   3  10   2   99.99   15.60
  -3  10  -2   91.19   13.30
   3 -10   2   95.89   14.00
  -3 -10  -2   95.99   15.70
  -3  10  -3  527.55   27.90
   3  10   3  551.74   31.10
   3 -10   3  590.14   28.90
  -3 -10  -3  562.54   27.30
  -3 -10  -3  581.34   32.80
   3 -10   4    6.00    7.50
  -3 -10  -4   17.80    7.10
   3  10   5  108.39   16.90
  -3  10  -5  124.09   14.10
  -3 -10  -5  103.29   17.20
  -3 -10  -5   97.09   15.70
   3 -10   5   68.99   11.40
   3  10   6  303.77   27.40
  -3  10  -6  323.97   20.80
   3  10   6  300.27   24.40
  -3 -10  -6  302.97   23.30
   3 -10   6  297.67   22.10
  -3 -10  -6  315.17   26.50
  -3  10  -7  182.08   16.30
   3  10   7  157.38   21.60
  -3 -10  -7  149.39   18.20
  -3 -10  -7  164.28   21.80
   3 -10   7  159.58   15.70
  -3  10  -8  125.29   14.70
   3  10   8  120.39   19.80
  -3 -10  -8  132.49   20.70
   3 -10   8  135.19   14.50
  -3 -10  -8  121.69   17.50
   3  10   9   25.10   10.60
  -3  10  -9   29.70    8.80
  -3 -10  -9   25.60   10.00
   3 -10   9   24.60    6.90
  -3 -10  -9   12.70   10.50
  -3  10 -10    4.60    6.80
   3  10  10   -1.40    9.00
  -3 -10 -10   -6.40    7.40
  -3 -10 -10  -13.30    7.00
   3 -10  10   -0.40    6.00
  -3  10 -11   -6.70    6.20
   3  10  11   -3.20    8.90
  -3 -10 -11  -12.70    7.90
  -3 -10 -11    2.60   10.40
   3 -10  11    8.80    7.00
  -3  10 -12  135.09   17.90
   3  10  12  130.69   22.50
  -3 -10 -12  100.39   17.80
   3 -10  12   98.29   15.10
  -3 -10 -12  141.89   20.60
   3  10  13    4.60   12.00
  -3  10 -13   17.80    9.60
  -3 -10 -13    5.10   10.80
  -3 -10 -13    3.90   11.60
   3 -10  13   10.40    7.80
  -3  10 -14   27.50   10.30
   3  10  14    7.80   15.30
   3 -10  14   21.70    8.90
  -3 -10 -14   34.90   14.80
  -3 -10 -14   27.70   14.00
   3  11 -14   57.19   12.30
   3 -11 -14   28.40   13.30
   3 -11 -14   27.70   12.70
   3  11 -13   -1.90    8.30
   3 -11 -13    5.90   11.20
   3 -11 -13   -0.70   10.00
  -3  11  12    1.00    8.80
   3  11 -12   19.00   14.70
   3 -11 -12    8.30   10.10
   3 -11 -12   10.70   10.70
  -3  11  11   -5.50    6.80
   3  11 -11  -11.10    7.50
   3 -11 -11    9.10   10.80
   3 -11 -11  -14.60    8.60
  -3 -11  11   -8.90    4.90
   3  11 -10  115.39   16.30
  -3  11  10   91.79   16.00
   3 -11 -10   56.19   12.80
  -3 -11  10   88.29   12.20
   3 -11 -10   72.19   16.00
  -3  11   9   32.50    9.90
   3  11  -9   39.50    9.30
   3 -11  -9   34.10   11.10
  -3 -11   9   32.30    7.80
   3 -11  -9   26.40   10.10
  -3 -11   9   56.29   11.40
  -3  11   8  363.26   25.90
   3  11  -8  406.86   24.40
   3 -11  -8  313.67   28.10
   3 -11  -8  376.86   27.20
  -3 -11   8  343.77   24.00
  -3 -11   8  345.87   22.40
   3 -11  -7   63.39   12.60
   3 -11  -7   69.59   12.40
  -3 -11   7   55.49    9.50
  -3 -11   7   74.19   18.20
  -3  11   6  445.56   30.80
   3  11  -6  496.45   27.40
  -3 -11   6  499.45   27.00
   3 -11  -6  488.25   32.30
   3 -11  -6  546.05   29.80
  -3 -11   6  513.15   27.60
   3  11  -5    4.40    6.50
   3 -11  -5   -4.90    7.90
  -3  11   4   19.90   10.40
   3  11  -4   27.80    8.30
   3  11  -4   12.50   10.00
  -3 -11   4   10.50    7.70
   3 -11  -4   25.00    9.50
   3 -11  -4   28.30   10.30
  -3  11   3  118.99   17.30
   3  11  -3  132.89   16.00
   3  11  -3   95.89   12.90
  -3  11   3  120.79   19.80
   3 -11  -3  133.79   19.00
   3 -11  -3  136.99   16.60
  -3  11   2  817.62   40.30
   3  11  -2  814.02   36.40
  -3  11   2  855.91   44.10
   3  11  -2  844.52   39.00
   3 -11  -2  864.91   41.70
   3 -11  -2  872.51   37.80
  -3 -11   2  874.81   42.00
   3  11  -1  177.98   18.10
  -3  11   1  188.68   18.90
  -3  11   1  181.98   21.20
   3  11  -1  125.79   15.10
   3 -11  -1  172.78   19.30
  -3 -11   1  120.49   18.80
  -3  11   0  630.04   33.30
   3  11   0  643.24   33.60
  -3 -11   0  670.53   37.30
   3 -11   0  691.03   35.20
  -3 -11   0  617.54   30.30
   3  11   1   12.50    7.80
  -3  11  -1   -4.10    7.30
  -3 -11  -1   -7.20    7.70
   3 -11   1   -0.70    7.30
   3  11   2    2.90    8.10
  -3  11  -2    6.60    7.30
  -3 -11  -2    8.20    9.30
   3 -11   2    5.40    8.10
  -3 -11  -2   -2.70    6.50
  -3  11  -3   10.20    7.40
   3  11   3    1.20    9.50
   3 -11   3   -0.10    7.70
  -3 -11  -3    4.50    8.10
  -3 -11  -3    3.10    7.20
   3  11   4  429.86   29.90
  -3  11  -4  460.85   26.40
  -3 -11  -4  531.85   33.90
   3 -11   4  501.35   29.30
  -3 -11  -4  534.75   28.30
   3  11   5  118.49   17.90
  -3  11  -5  130.29   15.40
  -3 -11  -5  107.09   16.50
   3  11   6  482.65   32.80
  -3  11  -6  443.46   25.80
   3  11   6  394.76   29.10
  -3 -11  -6  475.55   28.20
   3 -11   6  474.35   27.20
  -3 -11  -6  439.86   32.30
   3  11   7   -6.90    7.70
   3  11   7   -2.90    8.90
  -3  11  -7   11.80    6.80
  -3 -11  -7   -0.10    7.90
  -3 -11  -7    1.90    9.90
   3 -11   7    3.10    6.60
  -3  11  -8   19.30    7.80
   3  11   8   15.10   10.20
  -3 -11  -8   -2.70    9.60
  -3 -11  -8   -2.40    8.30
   3 -11   8   15.30    7.10
  -3  11  -9   -0.40    7.20
   3  11   9    7.90    9.90
  -3 -11  -9    3.70   17.10
   3 -11   9    6.00    6.80
  -3 -11  -9   23.40   10.60
  -3  11 -10   35.90    9.20
   3  11  10   16.80   11.50
  -3 -11 -10   20.50   10.70
  -3 -11 -10    8.20   11.50
   3 -11  10   12.40    7.90
   3  11  11   -4.20    9.70
  -3  11 -11  -16.80    7.60
   3 -11  11  -13.40    6.30
  -3 -11 -11   -9.10    9.00
  -3 -11 -11    2.80   10.60
   3  11  12   24.70   12.10
  -3  11 -12   25.90   10.40
  -3 -11 -12   48.90   14.90
   3 -11  12   13.20    8.20
  -3 -11 -12   12.00   10.80
   3  11  13  -12.30   11.40
  -3  11 -13  -18.30    9.10
  -3 -11 -13  -18.70    8.70
  -3 -11 -13    0.80   11.80
   3 -11  13  -16.40    7.40
  -3  12  13  -16.80   10.60
   3  12 -13    6.10   10.30
   3 -12 -13    2.00   11.80
   3 -12 -13   -4.70   11.50
  -3  12  12   14.30    9.60
   3  12 -12   20.60   10.60
   3 -12 -12   36.00   13.70
  -3 -12  12    9.90    7.30
   3 -12 -12   16.50   11.70
  -3  12  11   13.30    9.70
   3  12 -11   14.10    9.80
   3 -12 -11   12.30   11.70
  -3 -12  11    3.80    7.00
   3 -12 -11   27.90   12.60
  -3  12  10   22.50    9.60
   3 -12 -10    4.00   10.40
  -3 -12  10    4.20    7.30
   3 -12 -10   27.40   12.90
   3  12  -9   41.40   10.20
  -3  12   9   46.50   11.60
   3 -12  -9   30.20   14.00
   3 -12  -9   37.90   11.20
  -3 -12   9   43.40    8.40
  -3  12   8  115.19   18.40
   3  12  -8  118.49   16.30
  -3 -12   8  138.09   18.50
  -3 -12   8  138.09   15.80
   3 -12  -8  125.39   18.40
   3  12  -7   20.30    8.40
  -3 -12   7   10.70   10.30
  -3 -12   7    6.60    7.60
   3 -12  -7   31.80    9.40
   3 -12  -7   -1.20    9.50
   3  12  -6  130.59   16.50
  -3  12   6  121.89   18.00
  -3 -12   6  129.89   16.40
   3 -12  -6   82.39   16.30
  -3 -12   6  113.99   17.20
   3 -12  -6  168.08   18.50
  -3  12   5   26.00    9.70
   3  12  -5   20.30    8.40
   3 -12  -5   -6.20    9.80
   3 -12  -5   10.20    9.00
  -3 -12   5   12.50   12.60
  -3 -12   5    3.60   10.50
   3  12  -4    0.10    5.70
   3  12  -4   14.80    7.90
  -3  12   4   -3.40    7.40
  -3 -12   4   -5.10    7.50
   3 -12  -4   12.40    9.40
   3 -12  -4    2.30    9.30
   3  12  -3   10.10    6.60
  -3  12   3   12.00    9.60
   3  12  -3   19.40    9.00
  -3 -12   3    7.80    8.60
   3 -12  -3   -5.40    8.80
   3 -12  -3   35.00   10.10
   3  12  -2   20.50    8.40
  -3  12   2   16.90    8.90
   3 -12  -2   10.30    9.20
  -3 -12   2   -1.60    8.90
   3 -12  -2   31.90    9.30
   3  12  -1   24.90    9.10
  -3  12   1   35.40   10.10
   3 -12  -1   28.10   10.30
  -3 -12   1   18.00    8.90
   3  12   0   62.49   11.90
  -3  12   0   91.09   15.30
   3 -12   0   49.50   12.00
  -3 -12   0   47.90   12.20
  -3  12  -1  346.47   24.20
   3  12   1  319.17   24.60
  -3 -12  -1  318.87   27.20
  -3 -12  -1  284.07   21.00
   3 -12   1  354.06   25.60
  -3  12  -2   42.10   10.00
   3  12   2   33.70   10.60
   3 -12   2   42.30   10.20
  -3 -12  -2   34.60   11.40
  -3 -12  -2   46.60    9.70
   3  12   3   -8.80    8.20
  -3  12  -3   -6.20    6.70
  -3 -12  -3    2.10    7.80
   3 -12   3    1.50    7.50
  -3 -12  -3    4.30   10.80
  -3  12  -4   34.00    9.30
   3  12   4    3.60    8.90
   3 -12   4   11.90    8.20
  -3 -12  -4   32.00    8.40
  -3 -12  -4   16.50    8.90
  -3  12  -5   41.20   10.00
   3  12   5   18.20   10.20
   3 -12   5   36.90   10.20
  -3 -12  -5   45.10   12.50
  -3 -12  -5   37.70   10.70
   3  12   6   20.40   11.30
  -3  12  -6   31.50    8.40
   3  12   6   26.20   10.80
  -3 -12  -6   31.10    9.60
   3 -12   6   41.50    9.90
  -3 -12  -6   25.00   11.70
  -3  12  -7  225.08   19.30
   3  12   7  179.88   26.40
   3  12   7  240.58   25.90
  -3 -12  -7  210.88   22.50
   3 -12   7  235.08   20.20
  -3 -12  -7  240.88   27.10
   3  12   8    6.00   10.40
  -3  12  -8    3.50    7.20
  -3 -12  -8  -11.20    8.10
   3 -12   8    8.90    8.80
  -3 -12  -8   -2.30    9.40
  -3  12  -9   13.80    8.30
   3  12   9   24.80   11.80
  -3 -12  -9   19.20   12.90
   3 -12   9   20.40    8.90
  -3 -12  -9   38.50   12.10
   3  12  10   -7.00   10.30
  -3 -12 -10   -3.10   10.80
   3 -12  10   -6.40    7.50
  -3 -12 -10   -2.70    9.50
  -3  12 -11   15.60   10.10
   3  12  11   19.60   12.80
  -3 -12 -11    7.10   10.70
   3 -12  11    9.00    9.00
  -3 -12 -11    1.90   10.30
   3  13 -11   19.40   10.40
  -3  13  11   22.40   11.60
  -3 -13  11   18.60    9.00
   3 -13 -11   31.00   12.40
   3 -13 -11   -0.30   11.30
   3  13 -10   21.00   10.30
  -3  13  10   18.60   15.60
   3 -13 -10    9.00   11.40
   3 -13 -10   -3.80   12.10
  -3 -13  10    3.70    8.30
  -3  13   9    8.20   12.30
   3  13  -9   -3.40    8.80
   3 -13  -9  -22.10   10.60
  -3 -13   9    3.60    8.80
   3 -13  -9    0.30   10.10
  -3  13   8   -9.00    8.40
   3  13  -8   -6.40    7.90
   3 -13  -8  -11.90    8.10
   3  13  -7   -9.20   12.60
   3 -13  -7    4.10    8.90
  -3 -13   7    3.20   10.80
   3  13  -6   29.70   12.60
  -3 -13   6   24.70    9.90
   3 -13  -6   38.30   10.10
  -3 -13   6   37.30   12.30
   3 -13  -6   20.70   15.00
  -3  13   5   24.70   11.20
   3  13  -5   21.20    9.40
  -3 -13   5    5.40    8.80
   3 -13  -5   -2.00    9.40
   3 -13  -5   23.10    9.20
  -3 -13   5   -5.10    9.70
  -3  13   4   -5.30    9.00
   3  13  -4   -2.70    7.60
  -3 -13   4    3.80    8.80
   3 -13  -4  -18.10    8.80
  -3 -13   4   -7.50    8.90
   3 -13  -4   -6.50    7.50
   3  13  -3   14.30    8.40
  -3  13   3   -4.80    8.50
  -3 -13   3    9.60    9.70
   3 -13  -3    2.20    9.60
   3 -13  -3   11.50    8.60
  -3  13   2   -3.60    9.10
   3  13  -2    0.60    7.80
   3 -13  -2   10.60    8.10
   3 -13  -2    2.90    9.90
  -3 -13   2    0.90    7.20
  -3 -13   2    0.90    8.50
   3  13  -1    8.20    9.20
  -3  13   1   -3.90    9.10
  -3 -13   1   -5.10    7.20
   3 -13  -1   17.70    8.80
   3 -13  -1    5.40    8.80
  -3 -13   1    1.40    9.40
   3  13   0    7.70    7.70
  -3  13   0    4.80    8.10
   3 -13   0   -2.10    7.90
  -3 -13   0   -1.40    7.70
  -3 -13   0  -10.10    8.20
   3  13   1   16.10    9.00
  -3  13  -1   46.40   11.00
  -3 -13  -1   19.40   10.70
   3 -13   1   25.30    9.40
  -3  13  -2   36.60   10.20
   3  13   2   39.40   11.40
   3 -13   2   30.60    9.90
  -3 -13  -2   13.50    9.60
  -3 -13  -2   43.40   10.60
  -3  13  -3    5.50    8.30
  -3 -13  -3   17.80    8.70
   3 -13   3  -10.00    7.20
  -3 -13  -3   13.60   10.40
   3  13   4   63.29   14.90
  -3  13  -4   51.69   10.90
  -3 -13  -4   79.09   12.80
   3 -13   4   68.29   13.00
  -3 -13  -4   36.50   12.10
  -3  13  -5   32.20   10.00
   3  13   5   28.80   11.60
   3 -13   5   30.90   10.20
  -3 -13  -5   38.00   11.30
  -3 -13  -5   22.00   11.70
   3  13   6   48.60   14.00
   3  13   6   33.90   11.70
  -3  13  -6   43.50   10.80
   3 -13   6   52.59   12.40
  -3 -13  -6   46.80   17.80
  -3 -13  -6   60.79   13.90
  -3  13  -7   40.40   10.30
   3  13   7   35.40   12.30
   3  13   7   62.09   14.10
   3 -13   7   54.59   11.70
  -3 -13  -7   43.00   13.00
  -3 -13  -7   45.00   15.80
  -3  13  -8   55.69   12.20
   3  13   8   65.29   15.80
   3 -13   8   53.29   12.40
  -3 -13  -8   62.79   16.20
  -3 -13  -8   60.89   14.70
  -3  13  -9    3.80   10.90
   3  13   9   15.90   11.00
  -3 -13  -9  -12.30   11.30
  -3 -13  -9    5.50   11.50
   3 -13   9   -5.50    8.80
  -3  14   9   20.30   11.80
   3  14  -9    7.90    9.50
   3 -14  -9    1.20   13.50
   3 -14  -9    8.10   15.90
  -3 -14   9    1.50   11.00
  -3  14   8   38.10   13.50
   3  14  -8   30.80   11.10
   3 -14  -8   44.70   13.70
   3 -14  -8   25.40   14.30
  -3 -14   8   20.00   10.60
   3  14  -7   -7.60    8.60
  -3 -14   7   -6.70   10.30
   3 -14  -7   -3.70   12.30
   3 -14  -7    5.60   10.40
   3  14  -6   -7.60    9.00
   3 -14  -6  -14.40    8.80
  -3  14   5  -10.30    9.30
   3  14  -5   -2.60    8.60
   3 -14  -5  -18.40    9.00
  -3 -14   5  -12.10   11.60
  -3 -14   5   -8.60    9.60
   3  14  -4   14.00    9.70
  -3  14   4    0.80   10.20
  -3 -14   4   15.40   12.70
  -3 -14   4  -12.40    9.20
   3 -14  -4  -16.70   11.40
   3 -14  -4   13.30   10.30
  -3  14   3   93.79   16.60
   3  14  -3   66.49   13.00
   3 -14  -3   54.59   15.60
  -3 -14   3   56.19   13.20
  -3 -14   3   74.19   11.60
  -3  14   2   35.90   12.80
   3  14  -2   30.80   10.20
   3 -14  -2   29.00   12.20
  -3 -14   2   19.70    9.60
   3 -14  -2   45.50   11.20
  -3 -14   2   19.50   10.50
   3  14  -1  111.19   18.00
  -3  14   1   83.99   20.40
  -3 -14   1   75.19   14.50
  -3 -14   1  118.79   16.20
   3 -14  -1   85.39   15.70
   3  14   0   13.30    9.70
  -3  14   0    7.20   11.30
   3 -14   0  -10.40    9.10
  -3 -14   0   -6.50    8.10
   3 -14   0    4.30    8.00
  -3 -14   0  -13.00    9.60
   3  14   1   -3.10    9.40
  -3  14  -1   -4.50   10.20
  -3 -14  -1    0.90   10.50
   3 -14   1  -16.40    8.50
   3  14   2   21.80   11.30
  -3  14  -2   12.00   10.50
  -3 -14  -2   -3.50    9.90
   3 -14   2    7.50   10.80
  -3 -14  -2   21.70    8.90
   3  14   3    5.00   10.70
  -3  14  -3    5.40   10.40
  -3 -14  -3    0.90    9.90
  -3 -14  -3    3.90    8.70
   3 -14   3    3.10   11.20
  -3  14  -4   22.10   12.70
   3  14   4   24.60   12.30
  -3 -14  -4    1.40   13.00
   3 -14   4   23.60   10.60
  -3 -14  -4   41.50   11.10
   3  14   5   11.20   11.20
  -3 -14  -5   23.00   13.00
  -3 -14  -5   42.60   11.90
   3 -14   5   37.90   11.80
  -3  14  -6   -0.90    9.50
   3  14   6   19.40   12.20
   3  14   6    4.50   11.60
  -3 -14  -6   -5.90   12.00
   3 -14   6    3.20    9.80
  -3 -14  -6   11.60   12.40
   3  14   7    2.00   11.00
   3  14   7    8.40   12.10
  -3  14  -7   10.30    9.40
   3 -14   7    4.10    9.40
  -3 -14  -7   -5.10   11.50
  -3 -14  -7    9.20   11.70
   3  15  -5   32.40   12.30
  -3  15   5   27.80   12.30
   3 -15  -5   17.70   12.10
  -3 -15   5   46.70   13.00
   3 -15  -5   23.20   14.00
   3  15  -4   16.00   10.90
  -3  15   4   13.50   11.40
  -3 -15   4   14.50   11.90
   3 -15  -4    6.80   11.50
  -3 -15   4    5.30    9.70
   3 -15  -4   15.40   12.60
   3  15  -3   19.70   11.90
  -3  15   3    1.40   11.10
  -3 -15   3    5.10   12.10
   3 -15  -3    4.70   11.90
  -3 -15   3   17.20   10.70
   3 -15  -3    0.20   11.00
   3  15  -2   34.10   12.40
  -3  15   2   28.10   12.00
  -3 -15   2   13.40   13.00
   3 -15  -2   33.60   12.70
   3 -15  -2   27.60   14.00
  -3 -15   2   32.50   11.20
  -3  15   1   20.30   11.90
   3  15  -1   18.40   10.60
   3 -15  -1   34.00   11.90
  -3 -15   1   30.60   11.20
   3 -15  -1   13.00   11.70
  -3 -15   1   12.50   12.40
   3  15   0   25.90   12.50
  -3  15   0    5.20   10.60
   3 -15   0   16.00   11.20
  -3 -15   0    8.20   11.70
  -3 -15   0   27.20   11.10
   3  15   1    2.10   11.50
  -3  15  -1    1.80   10.60
   3 -15   1   -0.30    9.30
  -3 -15  -1    3.40   10.50
   3 -15   1  -14.20   11.20
  -3 -15  -1   -3.70   12.60
   3  15   2    3.90    9.60
  -3  15  -2   13.40    9.60
  -3 -15  -2    4.30   12.60
   3 -15   2   -3.30   12.00
  -3 -15  -2   23.20   10.90
   3  15   3   42.40   13.10
   3 -15   3   59.69   15.10
  -3 -15  -3   51.59   17.10
  -3 -15  -3   70.49   14.50
   4   0 -20   71.99   14.30
   4   0 -19  -16.80    7.90
   4   0 -18   -1.00    8.20
  -4   0  17  -13.00    5.90
   4   0 -17   -8.50    8.20
  -4   0  17   -6.20   10.40
  -4   0  16  198.58   25.60
   4   0 -16  133.59   22.80
   4   0 -15   -1.50    8.00
   4   0 -15  -10.50    9.30
  -4   0  15    3.10   11.60
  -4   0  15    4.30    9.30
   4   0 -14  438.16   30.80
  -4   0  13   -2.40    3.30
  -4   0  13   -4.60    6.40
   4   0 -13   -1.50    5.90
  -4   0  12  101.49    9.50
  -4   0  12  101.89   14.40
   4   0 -12   81.59   12.00
  -4   0  12   76.69   10.00
  -4   0  11   -1.60    3.10
  -4   0  11   -1.70    3.60
   4   0 -11   -8.20    5.30
   4   0 -11   -4.80    4.10
   4   0 -11   -6.20    3.00
  -4   0  10 1150.58   43.90
  -4   0  10 1323.57   47.90
  -4   0  10 1184.58   41.60
   4   0 -10 1143.19   45.20
   4   0 -10 1116.09   42.50
  -4   0   9   -0.80    2.70
   4   0  -9    3.60    3.10
  -4   0   9   -1.40    2.30
   4   0  -9    0.60    3.40
  -4   0   8 2212.78   75.39
   4   0  -8 2295.87   74.59
   4   0  -8 2407.66   77.39
  -4   0   8 2320.37   75.99
  -4   0   7   -0.60    2.00
   4   0  -7    1.50    1.90
  -4   0   7    0.90    1.60
   4   0  -7    4.40    4.10
   4   0  -7    2.40    2.60
  -4   0   6  363.46   15.30
   4   0  -6  372.76   16.60
   4   0  -6  355.26   14.30
   4   0  -6  362.86   15.90
  -4   0   6  368.06   13.90
  -4   0   5    0.60    1.40
   4   0  -5   -1.60    2.20
  -4   0   5   -0.50    1.10
   4   0  -5    1.20    1.80
  -4   0   4 4178.08  122.99
   4   0  -4 3849.61  122.79
   4   0  -4 3995.20  124.09
  -4   0   4 4068.79  123.89
  -4   0   3    0.00    1.30
   4   0  -3    0.30    1.60
  -4   0   3    0.20    1.00
   4   0  -3    0.00    1.00
   4   0  -1    0.00    1.20
   4   0  -1    0.70    1.30
   4   0  -1    0.00    0.70
  -4   0   1    0.00    1.30
   4   0   0 6033.00  184.18
  -4   0   0 5923.71  183.68
  -4   0   0 6019.60  182.88
   4   0   0 5955.60  182.78
   4   0   1    2.50    1.80
  -4   0  -1    1.00    1.90
  -4   0  -1    3.40    1.90
   4   0   1    0.10    1.70
   4   0   1   -0.50    1.90
  -4   0  -1   -0.30    0.90
   4   0   2  620.34   21.80
   4   0   2  570.04   21.40
  -4   0  -2  581.14   21.50
   4   0   2  570.04   23.60
  -4   0  -2  604.94   21.80
  -4   0  -2  572.84   23.30
   4   0   3   -0.70    1.80
  -4   0  -3   -3.10    1.80
  -4   0  -3    0.30    2.20
   4   0   3    0.50    1.60
   4   0   3    6.60    3.70
  -4   0  -3    0.70    1.70
   4   0   4  797.52   29.10
  -4   0  -4  761.22   31.00
   4   0   4  836.52   30.20
   4   0   4  771.62   32.10
  -4   0  -4  734.03   28.70
  -4   0  -4  748.23   27.90
   4   0   5    6.90    5.40
  -4   0  -5    2.10    2.40
  -4   0  -5   -0.80    2.80
   4   0   5    0.70    2.20
   4   0   5    0.00    2.90
  -4   0  -5   -0.40    2.50
   4   0   6 2220.28   74.79
  -4   0  -6 2299.17   78.19
  -4   0  -6 2233.78   75.29
  -4   0  -6 2180.18   72.69
   4   0   7   -2.50    3.50
   4   0   7    3.80    3.70
  -4   0  -7   -2.10    3.10
  -4   0  -7   -2.60    4.40
  -4   0  -7   -1.90    3.20
   4   0   7   12.90    7.80
  -4   0  -8    4.90    4.50
  -4   0  -8    5.20    3.70
   4   0   8    8.40    4.50
   4   0   8   -1.10    7.20
  -4   0  -8    9.70    5.10
   4   0   8    5.90    4.30
  -4   0  -9    0.30    3.40
  -4   0  -9   -5.00    4.60
  -4   0  -9   -8.90    6.60
   4   0   9   -4.10    6.30
   4   0   9    0.90    4.10
   4   0   9   -1.10    4.00
   4   0  10  118.99   12.90
  -4   0 -10  145.29   11.50
  -4   0 -10  144.69   14.20
   4   0  10  127.59   13.00
  -4   0 -10  129.39   16.10
   4   0  11  -11.20    7.30
  -4   0 -11   -5.20    3.90
  -4   0 -11   -4.20    5.10
   4   0  11    6.40    5.20
  -4   0 -12  215.78   15.70
  -4   0 -12  177.48   18.70
   4   0  12  138.39   25.10
   4   0  13   33.70   16.40
  -4   0 -13   -2.20    5.80
  -4   0 -13  -10.50    6.20
  -4   0 -14   -1.40    7.60
   4   0  14   27.00   15.80
  -4   0 -15  -12.60    7.80
   4   0  15    7.40   15.40
  -4   0 -15   -7.00    5.60
   4   0  16   -0.60   15.50
  -4   0 -16   -2.20    5.90
  -4   0 -17   -7.50    8.80
  -4   0 -18   -6.30   10.40
   4  -1 -20   85.19   16.30
   4   1 -19   -0.10    8.20
  -4   1  19    8.70   12.00
   4  -1 -19   -8.70    9.30
  -4   1  18   16.20   11.00
   4   1 -18   29.50   10.80
   4  -1 -18    5.80   10.30
  -4  -1  18   13.20    9.50
  -4   1  17   25.20   11.50
   4   1 -17   26.10    9.30
  -4  -1  17   11.40    6.50
   4  -1 -17   45.80   11.60
   4  -1 -17   15.50    8.50
  -4   1  16  707.03   38.50
   4   1 -16  725.83   38.40
   4  -1 -16  715.63   37.10
  -4  -1  16  757.92   40.60
   4  -1 -16  692.13   38.60
  -4   1  15   -8.60    5.20
   4   1 -15    5.80    8.10
  -4   1  15   -0.30    9.10
  -4  -1  15   10.00    5.90
   4  -1 -15    5.80    7.60
   4  -1 -15   14.90    8.20
   4   1 -14  890.11   42.00
  -4   1  14  969.50   45.20
  -4   1  14  853.61   40.40
   4  -1 -14  969.30   43.40
  -4  -1  14  933.21   36.60
   4  -1 -14  913.91   41.50
  -4   1  13   28.40    8.50
   4   1 -13   17.70    6.90
  -4   1  13   16.40    5.00
   4  -1 -13   15.30    6.00
  -4  -1  13   22.10    4.80
   4  -1 -13   16.40    7.10
   4  -1 -13   10.00    7.50
  -4   1  12   36.60    5.80
  -4   1  12   39.70    8.70
   4   1 -12   39.80    8.90
  -4   1  12   43.20    7.60
  -4  -1  12   48.70    7.20
   4  -1 -12   36.40    8.00
  -4  -1  12   38.10    7.90
   4  -1 -12   38.60    7.10
   4  -1 -12   34.50    8.20
  -4   1  11  208.68   13.00
  -4   1  11  219.08   14.30
   4   1 -11  191.28   15.80
  -4   1  11  250.67   17.40
  -4  -1  11  241.98   22.30
  -4  -1  11  197.98   11.90
   4  -1 -11  237.98   17.60
   4  -1 -11  214.68   16.70
   4  -1 -11  195.88   14.40
  -4   1  10  822.42   30.70
   4   1 -10  804.32   33.60
  -4   1  10  822.22   34.10
  -4   1  10  780.22   31.90
   4  -1 -10  837.12   34.40
  -4  -1  10  763.82   32.40
  -4  -1  10  796.42   29.30
   4  -1 -10  810.32   32.10
   4  -1 -10  773.72   33.10
  -4   1   9   12.30    3.80
   4   1  -9    7.40    5.90
  -4   1   9   11.00    3.40
  -4   1   9    3.00    5.30
   4   1  -9   12.10    4.80
  -4  -1   9   12.60    4.30
  -4  -1   9   13.30    3.90
   4  -1  -9    9.30    3.70
   4  -1  -9   17.30    5.30
   4  -1  -9   19.50    6.90
  -4   1   8 1410.56   49.50
   4   1  -8 1261.57   52.19
  -4   1   8 1434.16   49.80
  -4   1   8 1471.35   48.20
   4   1  -8 1458.35   50.49
   4  -1  -8 1462.65   51.09
  -4  -1   8 1401.86   49.50
  -4  -1   8 1501.25   46.80
   4  -1  -8 1472.55   49.40
  -4   1   7  104.19    8.40
  -4   1   7  106.19    8.00
   4   1  -7  111.89   10.80
   4   1  -7  114.99    8.50
  -4   1   7  110.89    7.30
   4   1  -7  100.29    6.50
   4  -1  -7  107.59    8.80
  -4  -1   7  112.89    8.00
  -4  -1   7  107.29    6.10
   4  -1  -7  112.69    8.00
   4   1  -6  312.87   14.40
   4   1  -6  311.67   16.60
  -4   1   6  365.46   14.10
  -4   1   6  323.57   14.30
   4   1  -6  310.37   12.10
   4  -1  -6  318.87   15.00
  -4  -1   6  321.17   11.80
   4  -1  -6  327.77   14.10
  -4  -1   6  317.97   14.10
  -4   1   5 1312.57   41.30
   4   1  -5 1200.48   41.50
  -4   1   5 1287.07   42.00
   4   1  -5 1244.88   39.60
   4  -1  -5 1263.07   41.50
  -4  -1   5 1221.48   41.30
   4  -1  -5 1249.38   42.30
  -4   1   4  118.79    6.50
   4   1  -4  108.19    6.20
  -4   1   4  120.29    6.80
   4   1  -4  120.89    5.90
   4  -1  -4  111.29    6.50
  -4  -1   4  109.19    6.00
   4  -1  -4  104.89    6.70
   4   1  -3  391.06   14.30
   4   1  -3  372.96   13.70
  -4   1   3  403.86   14.60
   4   1  -3  384.66   15.00
  -4  -1   3  387.96   14.30
  -4  -1   3  393.86   13.70
   4  -1  -3  386.06   14.50
   4  -1  -3  396.76   14.90
  -4   1   2  283.97   10.70
   4   1  -2  290.77   12.30
   4   1  -2  274.57    9.90
  -4   1   2  302.07   11.40
   4   1  -2  292.47   11.50
  -4  -1   2  287.67   11.30
   4  -1  -2  290.07   11.20
   4  -1  -2  272.07   10.50
  -4  -1   2  271.47   12.30
  -4   1   1  170.28    8.20
   4   1  -1  173.98    8.30
   4   1  -1  181.38    7.40
  -4  -1   1  185.78    7.60
   4  -1  -1  166.68    8.30
  -4  -1   1  186.58    8.60
   4   1   0  209.08    8.30
   4   1   0  213.28    8.30
  -4   1   0  200.08   10.40
   4   1   0  218.48   10.00
   4   1   0  204.08   10.60
   4  -1   0  237.68   11.60
  -4  -1   0  225.28    8.50
  -4  -1   0  222.68   10.20
   4   1   1 7274.47  220.58
   4   1   1 7324.47  220.08
   4   1   1 7431.06  222.08
  -4   1  -1 7109.69  223.38
   4   1   1 6838.42  223.08
  -4  -1  -1 7227.98  221.98
  -4  -1  -1 7827.72  220.18
  -4  -1  -1 7296.17  223.48
   4  -1   1 6990.70  223.68
  -4  -1  -1 7307.57  222.08
  -4   1  -2  167.38   12.00
   4   1   2  146.89    9.90
   4   1   2  153.38    8.80
   4   1   2  155.48    8.30
  -4  -1  -2  156.38    9.10
   4  -1   2  156.78    9.30
  -4  -1  -2  137.29    8.00
   4  -1   2  159.78    8.70
   4  -1   2  181.08   13.00
  -4  -1  -2  153.08    7.30
  -4  -1  -2  155.78   10.30
   4   1   3 1188.68   43.10
   4   1   3 1151.38   41.70
  -4   1  -3 1175.18   42.80
  -4  -1  -3 1139.99   39.30
  -4  -1  -3 1183.38   37.90
  -4  -1  -3 1139.09   39.50
   4  -1   3 1094.29   38.50
   4  -1   3 1147.99   39.90
  -4  -1  -3 1154.28   41.50
   4   1   4   64.49    6.80
  -4   1  -4   56.19    6.10
   4   1   4   57.89    6.10
  -4   1  -4   72.49    9.90
  -4   1  -4   51.79    6.60
   4   1   4   59.99    8.40
  -4  -1  -4   65.29    6.60
   4  -1   4   65.29    6.00
   4  -1   4   55.19    6.50
  -4  -1  -4   54.69    6.20
  -4  -1  -4   58.89    7.50
  -4   1  -5  309.97   14.40
   4   1   5  337.07   19.10
  -4   1  -5  301.67   16.10
   4   1   5  315.57   16.30
   4   1   5  315.97   15.70
  -4   1  -5  331.97   19.60
   4  -1   5  319.57   16.20
  -4  -1  -5  333.87   17.60
   4  -1   5  328.57   16.00
  -4  -1  -5  323.17   16.10
  -4  -1  -5  312.97   15.20
   4   1   6  359.36   17.90
  -4   1  -6  360.36   18.40
   4   1   6  403.66   23.00
  -4   1  -6  343.27   16.10
  -4   1  -6  363.16   22.20
   4   1   6  362.56   18.50
  -4  -1  -6  348.27   18.20
  -4  -1  -6  375.06   17.30
   4  -1   6  356.26   18.40
   4  -1   6  363.56   16.50
  -4  -1  -6  350.76   19.70
   4   1   7 1730.13   66.29
  -4   1  -7 1834.02   66.79
  -4   1  -7 1764.92   62.19
   4   1   7 1731.13   61.29
  -4   1  -7 1753.02   58.39
   4   1   7 1725.33   61.89
  -4  -1  -7 1706.63   59.59
  -4  -1  -7 1775.32   62.09
   4  -1   7 1777.52   58.29
   4  -1   7 1762.62   61.99
  -4  -1  -7 1771.72   64.09
   4   1   8  102.99   10.20
  -4   1  -8  102.79   15.50
  -4   1  -8  110.39   11.70
   4   1   8   93.39   16.80
  -4   1  -8  101.19    9.00
   4   1   8  116.69   11.20
  -4  -1  -8  106.19   12.30
  -4  -1  -8  112.79   11.80
  -4  -1  -8  110.69   10.20
   4  -1   8  115.99   11.10
  -4   1  -9  205.08   12.50
   4   1   9  220.48   15.00
   4   1   9  213.68   17.60
  -4   1  -9  229.68   31.10
  -4   1  -9  221.68   22.30
  -4  -1  -9  217.18   19.10
   4  -1   9  181.18   14.90
  -4  -1  -9  213.78   17.30
  -4  -1  -9  203.78   13.90
   4   1  10   -6.30    7.90
  -4   1 -10   -0.50    4.70
   4   1  10   -2.60    4.20
  -4   1 -10   -5.90    6.20
  -4   1 -10    1.30    3.90
  -4  -1 -10   -0.10    4.30
   4  -1  10    1.70    6.10
   4  -1  10   -0.20    8.20
   4  -1  10    0.90    4.80
  -4  -1 -10    1.10    5.00
  -4   1 -11   46.60    9.50
   4   1  11   42.50    8.10
  -4   1 -11   36.00   10.90
  -4   1 -11   35.80    6.60
   4  -1  11   16.50   11.20
  -4  -1 -11   48.50    9.40
  -4  -1 -11   36.10    9.40
   4  -1  11   30.90    7.40
  -4   1 -12  102.29   15.30
  -4  -1 -12   88.59   12.70
  -4  -1 -12   68.09   12.20
   4  -1  12  102.69   14.00
   4  -1  12  143.29   26.20
  -4   1 -13  179.88   19.10
  -4  -1 -13  163.88   16.30
  -4  -1 -13  153.48   18.80
   4  -1  13  199.48   31.10
   4   1  14   58.39   17.10
  -4   1 -14   15.30    9.20
   4  -1  14   45.90   18.50
  -4  -1 -14   23.60    7.90
  -4  -1 -14   24.90   11.00
   4   1  15   22.90   15.20
  -4   1 -15   17.20    9.40
  -4  -1 -15    1.80    8.10
   4  -1  15    8.30   14.30
  -4  -1 -15   14.40    6.80
   4   1  16   10.40   16.80
  -4   1 -16   -7.90   10.40
  -4  -1 -16    1.50    7.30
   4  -1  16   -6.80   14.00
  -4   1 -17  -16.10    8.70
   4   1  17    2.50   18.00
   4  -1  17  -22.00   13.20
  -4  -1 -17  -11.10    8.90
  -4  -1 -17   -9.90    8.60
  -4   1 -18   12.20   11.60
   4   1  18    1.90   20.40
  -4  -1 -18   19.70   12.20
   4  -1  18   19.60   16.30
  -4   2  20   14.60   12.90
   4   2 -20   -2.90    9.30
   4  -2 -20   -1.10   10.00
  -4   2  19   68.59   15.80
   4   2 -19   65.29   13.40
   4  -2 -19   83.39   12.60
   4  -2 -19   64.39   14.90
   4   2 -18   -6.00    7.80
  -4   2  18    9.60    9.40
   4  -2 -18  -38.20   17.00
  -4  -2  18    1.30    6.20
   4  -2 -18  -13.80    8.30
   4  -2 -18    3.30    5.40
   4   2 -17  211.18   21.70
  -4   2  17  220.78   27.70
   4  -2 -17  214.98   19.60
  -4  -2  17  241.38   23.50
   4  -2 -17  209.38   24.20
  -4   2  16   -2.80    9.50
   4   2 -16   13.50    8.00
   4  -2 -16   25.40   11.30
  -4  -2  16    7.10    5.80
   4  -2 -16    2.40    8.70
   4   2 -15   31.30    9.70
  -4   2  15   25.80    9.90
  -4   2  15   14.60   10.60
   4  -2 -15   25.60   10.30
  -4  -2  15   29.80    6.10
   4  -2 -15   23.20    7.70
  -4   2  14    7.70    7.20
   4   2 -14    9.50    7.70
  -4   2  14    0.90    5.30
  -4  -2  14    4.60    4.20
   4  -2 -14    0.90    5.90
   4  -2 -14    5.80    6.20
   4  -2 -14   -2.80    7.40
  -4   2  13  177.08   14.50
  -4   2  13  202.18   18.40
   4   2 -13  160.08   16.30
   4  -2 -13  152.18   16.40
  -4  -2  13  178.88   11.80
   4  -2 -13  156.08   14.70
   4  -2 -13  161.88   16.00
   4   2 -12   48.70    9.30
  -4   2  12   45.40    9.10
  -4   2  12   66.69    8.70
  -4   2  12   62.49    9.60
  -4  -2  12   41.20    7.90
   4  -2 -12   51.49    8.40
   4  -2 -12   54.39   10.00
   4  -2 -12   57.59    9.40
  -4  -2  12   64.69    7.30
   4   2 -11  440.66   23.40
  -4   2  11  477.15   23.80
  -4   2  11  428.46   20.70
  -4   2  11  401.76   21.30
   4  -2 -11  448.66   22.80
  -4  -2  11  435.16   24.70
   4  -2 -11  461.85   28.80
   4  -2 -11  457.55   21.50
  -4  -2  11  463.95   18.80
  -4   2  10   31.90    6.10
  -4   2  10   23.50    6.40
   4   2 -10   19.20    5.90
  -4   2  10   20.00    4.40
   4   2 -10   11.20    6.90
  -4  -2  10   25.60    6.00
  -4  -2  10   21.90    4.10
   4  -2 -10   26.10    5.70
   4  -2 -10   23.20    5.10
   4  -2 -10   29.50    7.00
  -4   2   9    5.50    5.00
  -4   2   9   14.20    3.90
  -4   2   9    9.60    3.90
   4   2  -9    4.40    6.50
   4   2  -9   13.50    4.80
   4  -2  -9    7.80    4.40
  -4  -2   9    7.50    2.80
   4  -2  -9   13.90    4.60
   4  -2  -9    7.00    3.40
  -4  -2   9    8.70    3.60
  -4   2   8   53.89    6.70
   4   2  -8   39.80    6.00
  -4   2   8   33.50    4.90
   4   2  -8   36.30    8.10
  -4   2   8   37.50    6.30
   4  -2  -8   30.10    5.70
  -4  -2   8   36.40    5.70
   4  -2  -8   46.60    7.30
   4   2  -7  279.07   14.10
   4   2  -7  275.37   17.00
  -4   2   7  277.57   13.80
  -4   2   7  282.27   13.20
   4  -2  -7  277.77   14.40
  -4  -2   7  278.97   13.50
   4  -2  -7  283.67   14.90
  -4   2   6   70.99    5.90
  -4   2   6   74.79    6.50
   4   2  -6   63.49    6.10
   4   2  -6   65.19    6.80
   4   2  -6   49.10    8.20
   4  -2  -6   64.59    6.60
  -4  -2   6   64.89    6.10
   4  -2  -6   62.49    6.40
  -4   2   5  578.24   21.70
   4   2  -5  583.44   22.70
  -4   2   5  590.64   22.10
   4   2  -5  557.44   21.20
  -4  -2   5  584.14   21.10
   4  -2  -5  603.84   22.70
   4  -2  -5  570.04   22.10
  -4   2   4   17.00    3.00
  -4   2   4   13.70    3.30
   4   2  -4   15.60    4.10
   4   2  -4   14.40    3.00
  -4  -2   4   14.90    2.40
  -4  -2   4   22.30    3.00
  -4  -2   4   13.70    3.10
   4  -2  -4   14.50    3.10
   4  -2  -4   13.00    2.90
   4   2  -3  125.49    7.50
  -4   2   3  136.19    7.60
   4   2  -3  123.69    5.70
   4  -2  -3  132.99    7.40
  -4  -2   3  130.19    7.70
   4  -2  -3  123.49    7.40
  -4  -2   3  129.09    5.70
  -4   2   2  572.84   20.10
   4   2  -2  503.95   18.30
   4   2  -2  547.55   19.80
  -4  -2   2  553.54   19.90
   4  -2  -2  538.75   19.90
  -4  -2   2  583.94   20.20
   4  -2  -2  529.15   19.00
  -4   2   1   -0.10    1.40
   4   2  -1   -0.40    1.40
   4   2  -1    1.00    1.40
   4  -2  -1   -0.40    1.40
  -4  -2   1   -1.30    1.40
  -4  -2   1   -1.80    1.70
   4  -2  -1    0.40    1.20
   4   2   0 1504.75   50.99
  -4   2   0 1653.13   49.20
  -4   2   0 1423.16   52.89
   4   2   0 1628.54   50.39
  -4  -2   0 1659.33   50.59
   4  -2   0 1602.04   48.90
   4  -2   0 1547.85   50.89
  -4  -2   0 1610.34   51.89
   4   2   1    9.40    2.30
   4   2   1    4.90    1.80
   4   2   1    7.70    3.10
  -4   2  -1    8.40    1.50
   4   2   1    6.70    2.60
  -4  -2  -1    4.80    2.70
  -4  -2  -1    7.40    2.10
  -4  -2  -1    9.10    2.30
   4  -2   1    9.30    1.60
   4   2   2  330.57   16.10
   4   2   2  349.37   13.80
   4   2   2  308.47   14.90
  -4   2  -2  314.07   18.60
  -4   2  -2  349.96   12.00
   4   2   2  312.77   13.20
  -4  -2  -2  320.77   14.90
  -4  -2  -2  377.56   13.80
  -4  -2  -2  321.37   17.90
  -4  -2  -2  329.47   13.60
   4   2   3  221.08   12.20
  -4   2  -3  230.48   16.70
   4   2   3  222.08   13.30
  -4   2  -3  212.58   12.10
   4   2   3  224.68   12.10
  -4  -2  -3  248.48   13.50
  -4  -2  -3  207.28   11.20
  -4  -2  -3  225.98   12.00
   4  -2   3  220.08   12.20
  -4  -2  -3  235.88   12.00
   4   2   4  508.85   20.30
   4   2   4  499.85   22.90
  -4   2  -4  482.25   18.50
  -4   2  -4  496.95   26.20
   4   2   4  492.65   21.60
  -4  -2  -4  485.05   20.70
  -4  -2  -4  523.75   21.40
   4  -2   4  494.45   19.50
  -4  -2  -4  524.95   22.90
   4  -2   4  493.55   21.40
  -4  -2  -4  532.95   19.90
  -4   2  -5  200.48   18.40
   4   2   5  197.28   14.50
   4   2   5  200.08   12.00
   4   2   5  206.68   13.30
  -4  -2  -5  208.18   11.40
  -4  -2  -5  200.38   12.60
   4  -2   5  211.38   11.50
  -4  -2  -5  205.78   14.00
   4  -2   5  213.68   13.10
  -4  -2  -5  213.78   12.80
   4   2   6  266.07   15.80
  -4   2  -6  287.17   16.50
   4   2   6  283.17   18.70
  -4   2  -6  339.27   24.20
   4   2   6  253.17   14.90
  -4  -2  -6  281.77   14.50
   4  -2   6  265.77   15.90
   4  -2   6  289.77   18.20
  -4  -2  -6  275.67   16.10
  -4  -2  -6  276.47   15.60
  -4  -2  -6  278.57   17.20
   4   2   7 1052.19   43.70
   4   2   7 1047.40   40.80
  -4   2  -7 1036.40   46.50
  -4   2  -7 1007.60   40.50
   4   2   7 1033.40   39.50
  -4  -2  -7 1064.79   38.60
   4  -2   7 1051.29   37.20
  -4  -2  -7 1123.19   40.00
  -4  -2  -7 1070.59   42.40
  -4  -2  -7 1035.40   40.70
   4  -2   7  971.90   40.30
   4   2   8  101.49   10.60
  -4   2  -8   90.49   17.50
   4   2   8  136.19   16.90
   4   2   8  102.19   10.40
  -4   2  -8  112.49   11.60
  -4  -2  -8   97.99   12.50
   4  -2   8  100.89    8.60
   4  -2   8  124.89   17.90
  -4  -2  -8  102.99   11.60
  -4  -2  -8   93.99   10.60
  -4   2  -9   74.89   11.40
   4   2   9   69.69   10.30
   4   2   9   76.99   10.60
   4   2   9   62.29   12.70
  -4   2  -9   50.39   11.80
  -4  -2  -9   59.39   11.40
  -4  -2  -9   90.09   10.30
  -4  -2  -9   55.99   11.10
   4  -2   9   72.39   11.20
   4   2  10   95.29   12.30
  -4   2 -10  107.39   13.30
  -4   2 -10  102.69   20.00
   4   2  10   99.49   12.50
   4  -2  10  132.29   18.00
   4  -2  10  131.39   22.20
  -4  -2 -10  109.89   14.10
  -4  -2 -10   85.79   11.50
  -4   2 -11  263.37   20.60
  -4  -2 -11  256.17   22.00
  -4  -2 -11  252.77   20.70
   4  -2  11  273.27   19.30
   4  -2  11  258.47   28.30
  -4  -2 -11  272.97   18.20
   4   2  12   -6.90   10.30
  -4   2 -12    3.00    8.10
   4  -2  12   -4.10    6.00
  -4  -2 -12   -0.40    7.10
   4  -2  12   11.90   13.00
  -4  -2 -12   -1.40    5.50
  -4  -2 -12   -8.20    7.30
  -4   2 -13  901.81   43.60
   4  -2  13  882.81   53.49
  -4  -2 -13  880.31   43.50
  -4  -2 -13  943.21   40.30
  -4  -2 -14   18.90    8.80
   4  -2  14   -4.50   14.50
  -4  -2 -14   10.80    8.00
  -4   2 -15  208.78   22.90
  -4  -2 -15  205.48   20.90
  -4  -2 -15  236.48   23.10
   4  -2  15  203.08   30.80
   4   2  16   -8.70   13.50
  -4   2 -16  -12.70    8.50
  -4  -2 -16   -9.00   14.20
   4  -2  16  -10.40   12.10
  -4  -2 -16   -3.40    7.40
  -4   2 -17   80.09   15.20
   4   2  17   76.99   24.50
  -4  -2 -17   72.29   15.30
  -4  -2 -17   69.69   12.20
   4  -2  17   47.30   25.00
  -4   2 -18   14.10   10.70
  -4  -2 -18  -10.10    8.90
   4  -2  18    8.30   14.40
  -4  -2 -18   11.30   12.30
   4   3 -20   71.09   14.80
   4   3 -20   85.99   15.70
  -4   3  20   71.19   14.80
   4  -3 -20   63.79   15.30
   4  -3 -20   69.09   17.70
  -4  -3  20   63.59   13.50
   4   3 -19   -6.90    8.60
   4   3 -19    1.20    9.40
  -4   3  19   -3.10    9.80
   4  -3 -19    1.20    8.40
  -4  -3  19    2.00    6.80
   4   3 -18  -11.10    7.30
  -4   3  18   -0.10    9.50
   4  -3 -18   -7.50    7.10
   4   3 -17   -6.00    8.90
  -4   3  17   -6.60    8.40
   4   3 -17    6.10    7.30
  -4  -3  17    9.10    5.50
   4  -3 -17  -11.50    8.20
   4  -3 -17    6.20    9.60
  -4   3  16   50.09   12.70
   4   3 -16   54.09   10.70
   4   3 -16   66.09   11.90
  -4  -3  16   77.09   10.00
   4  -3 -16   42.90   11.20
   4  -3 -16   45.60   10.90
  -4   3  15    0.60    8.30
   4   3 -15   -6.00    6.10
   4   3 -15    3.10    7.60
   4  -3 -15  -15.60    7.10
   4  -3 -15    0.10    7.20
   4  -3 -15    3.10    5.50
  -4  -3  15    4.10    4.60
   4   3 -14  165.48   19.20
   4   3 -14  190.78   17.90
  -4   3  14  222.38   20.10
   4  -3 -14  160.58   15.40
  -4  -3  14  203.98   13.30
   4  -3 -14  177.48   18.80
   4  -3 -14  179.88   20.10
  -4   3  13    8.90    7.70
   4   3 -13    5.80    6.20
   4   3 -13    4.30    6.60
  -4   3  13    7.20    4.60
   4   3 -13   -5.20    6.60
   4  -3 -13    6.00    7.00
   4  -3 -13    3.60    6.70
   4  -3 -13   12.40    5.30
  -4  -3  13    6.50    3.80
   4   3 -12    0.70    5.90
   4   3 -12    2.80    6.70
  -4   3  12   10.60    4.70
  -4   3  12    0.50    6.80
   4   3 -12    0.90    5.30
  -4  -3  12    1.50    4.90
  -4  -3  12    8.30    3.60
   4  -3 -12   -2.60    6.50
   4  -3 -12   -6.10    4.20
   4  -3 -12    4.00    5.60
  -4   3  11   10.70    6.90
  -4   3  11    6.80    3.90
  -4   3  11    4.60    4.20
   4   3 -11   16.00    5.20
   4   3 -11   10.60    5.20
  -4  -3  11    9.00    5.20
   4  -3 -11    4.50    5.40
  -4  -3  11   10.10    3.50
   4  -3 -11   -0.80    4.60
   4  -3 -11   10.50    4.10
   4   3 -10  344.47   19.50
  -4   3  10  350.86   18.90
   4   3 -10  338.07   18.60
   4   3 -10  300.27   23.30
  -4   3  10  346.37   17.60
  -4   3  10  341.07   17.90
  -4  -3  10  346.97   14.20
  -4  -3  10  348.17   18.50
   4  -3 -10  351.76   16.50
   4  -3 -10  345.47   19.90
   4  -3 -10  338.87   20.20
   4   3  -9  232.08   14.20
  -4   3   9  219.98   13.10
  -4   3   9  223.18   13.50
   4   3  -9  206.78   18.20
   4   3  -9  224.58   14.70
  -4  -3   9  211.68   13.40
   4  -3  -9  205.08   15.10
   4  -3  -9  222.18   15.00
   4   3  -8  326.57   16.60
   4   3  -8  344.97   17.70
  -4   3   8  337.57   16.70
   4   3  -8  318.87   21.80
  -4   3   8  335.97   16.30
   4  -3  -8  335.37   18.10
   4  -3  -8  333.47   18.20
  -4  -3   8  332.47   16.50
  -4   3   7   10.90    2.90
   4   3  -7    8.70    3.20
   4   3  -7   10.40    3.40
   4   3  -7    6.30    4.60
   4  -3  -7    2.00    3.30
  -4  -3   7    4.80    2.80
   4  -3  -7   12.40    4.00
   4   3  -6   84.29    8.00
  -4   3   6   89.09    7.40
   4   3  -6   82.09    6.90
  -4   3   6   87.39    7.60
  -4  -3   6   98.19    8.20
   4  -3  -6   84.69    8.10
   4  -3  -6   92.69    8.30
  -4   3   5   79.79    6.90
   4   3  -5   80.49    7.20
  -4   3   5   88.59    6.90
   4   3  -5   79.69    5.80
  -4  -3   5   69.19    7.10
  -4  -3   5   71.59    5.50
  -4  -3   5   76.79    5.70
   4  -3  -5   72.59    7.10
   4  -3  -5   83.69    7.50
  -4   3   4  248.08   11.90
   4   3  -4  238.88   12.20
  -4  -3   4  252.17   10.30
  -4  -3   4  234.88   12.40
   4  -3  -4  256.67   12.30
   4  -3  -4  247.28   11.90
   4  -3  -4  252.17   12.40
  -4  -3   4  249.58   10.70
   4   3  -3  452.05   18.40
  -4   3   3  468.35   18.60
   4  -3  -3  455.45   18.70
   4  -3  -3  474.95   18.50
  -4  -3   3  490.45   19.10
   4   3  -2  129.29    6.80
  -4   3   2  143.69    8.00
   4   3  -2  155.38    8.40
  -4   3   2  142.29    8.50
   4  -3  -2  150.38    7.70
  -4  -3   2  145.99    7.40
  -4  -3   2  155.98    8.70
   4  -3  -2  145.19    8.50
   4   3  -1 1461.05   47.30
  -4   3   1 1547.55   48.90
  -4   3   1 1490.25   47.40
   4   3  -1 1500.95   48.10
   4  -3  -1 1439.76   49.10
   4  -3  -1 1542.75   47.00
   4  -3  -1 1449.06   48.30
  -4  -3   1 1459.55   47.80
  -4  -3   1 1292.57   52.39
   4   3   0   -1.00    1.60
  -4   3   0   -2.60    1.60
   4   3   0   -0.80    1.70
  -4   3   0   -5.60    3.90
   4  -3   0   -0.80    1.40
  -4  -3   0   -0.60    3.10
  -4  -3   0   -1.70    1.80
   4  -3   0   -1.00    1.60
   4  -3   0    4.20    3.60
  -4   3  -1  272.07   11.00
   4   3   1  238.98   10.10
   4   3   1  278.37   13.20
   4   3   1  273.37   12.20
  -4  -3  -1  300.97   12.80
   4  -3   1  253.77   12.00
   4  -3   1  269.17   10.80
  -4  -3  -1  261.37   13.10
   4  -3   1  271.07   16.00
  -4  -3  -1  251.17   10.90
   4   3   2   49.99    6.00
   4   3   2   49.50    7.10
   4   3   2   59.99    5.90
  -4   3  -2   55.49    4.40
   4   3   2   45.60    4.50
   4  -3   2   61.59   10.20
  -4  -3  -2   46.10    5.10
  -4  -3  -2   47.20    6.60
  -4  -3  -2   57.39    5.50
   4  -3   2   48.20    4.50
   4   3   3    4.10    4.20
  -4   3  -3    7.50    2.30
   4   3   3   13.10    3.50
   4   3   3    4.70    3.40
   4   3   3    1.90    2.80
  -4   3  -3    1.50    4.70
  -4  -3  -3   11.30    3.20
   4  -3   3    2.70    2.40
  -4  -3  -3    4.40    3.00
   4  -3   3   14.20    5.60
  -4  -3  -3    3.40    3.40
   4   3   4  141.99   12.10
   4   3   4  132.09    9.30
   4   3   4  141.59   11.00
  -4   3  -4  153.98    8.40
  -4  -3  -4  151.48   12.00
   4  -3   4  165.08   11.20
  -4  -3  -4  144.69   11.50
   4  -3   4  139.09   15.40
  -4  -3  -4  132.89    9.90
  -4  -3  -4  145.39    9.40
  -4   3  -5  297.97   13.70
   4   3   5  292.27   18.10
   4   3   5  303.17   16.80
   4   3   5  318.97   15.40
  -4  -3  -5  296.37   16.10
  -4  -3  -5  310.57   15.10
   4  -3   5  296.07   16.60
   4  -3   5  303.87   22.10
   4  -3   5  292.67   15.90
  -4  -3  -5  308.77   17.70
   4   3   6   -3.60    3.00
   4   3   6   -3.40    3.50
  -4   3  -6   -1.50    2.50
   4   3   6   -4.30    3.80
   4  -3   6   16.30    8.50
   4  -3   6    0.60    3.10
   4  -3   6    0.20    3.60
  -4  -3  -6   -7.10    3.70
  -4  -3  -6   -4.60    3.60
  -4  -3  -6   -0.40    3.10
   4   3   7 1413.46   51.99
   4   3   7 1439.76   54.69
   4   3   7 1441.16   50.49
  -4   3  -7 1364.06   48.70
   4  -3   7 1418.06   52.29
   4  -3   7 1280.77   58.19
   4  -3   7 1409.46   47.90
  -4  -3  -7 1448.85   50.19
  -4  -3  -7 1421.46   51.99
  -4  -3  -7 1444.76   53.59
  -4   3  -8  250.87   17.60
   4   3   8  256.17   20.20
  -4   3  -8  226.98   25.20
   4   3   8  274.57   18.10
   4   3   8  276.87   16.10
  -4   3  -8  248.88   14.70
  -4  -3  -8  268.67   18.40
   4  -3   8  272.27   18.10
   4  -3   8  242.58   23.80
   4  -3   8  267.57   13.60
  -4  -3  -8  252.47   17.30
  -4  -3  -8  272.27   15.80
  -4  -3  -8  254.87   17.00
   4   3   9    4.70    8.00
  -4   3  -9   -5.30    3.60
  -4   3  -9   -8.30    9.40
   4   3   9   -1.70    4.60
  -4   3  -9    8.20    5.70
   4   3   9   -5.90    3.70
   4  -3   9    4.40    8.60
  -4  -3  -9   -1.70    4.80
  -4  -3  -9    0.10    5.10
   4  -3   9   -0.80    5.30
   4  -3   9   -1.90    3.00
  -4  -3  -9   -2.00    5.00
   4   3  10  523.75   33.50
   4   3  10  518.25   31.40
  -4   3 -10  495.65   25.50
   4   3  10  515.25   26.50
  -4   3 -10  540.95   28.40
   4  -3  10  540.95   36.60
  -4  -3 -10  548.15   26.10
  -4  -3 -10  560.94   42.10
  -4  -3 -10  527.15   28.50
  -4  -3 -10  553.54   27.30
  -4   3 -11   15.00    8.00
   4   3  11    5.80   12.10
  -4   3 -11   16.10    6.50
  -4  -3 -11    7.00    6.60
  -4  -3 -11    5.80    7.40
  -4  -3 -11   15.60    8.00
  -4  -3 -11   19.30    6.40
   4  -3  11   39.80   13.60
  -4   3 -12   38.20   10.40
  -4   3 -12   44.70    8.20
  -4  -3 -12   23.50    9.30
  -4  -3 -12   39.40    9.90
[truncated: 1,147,417 more chars]
