# Supplementary material
Source: publisher figshare collection journal article supplement (https://acs.figshare.com/ndownloader/files/22494656)
Supplement: Supplementary file 1 [file 22494656 › CIF/1Z.cif]

data_1z
_audit_creation_date               2019-03-15
_audit_creation_method
;
Olex2 1.2
(compiled 2018.05.29 svn.r3508 for OlexSys, GUI svn.r5506)
;
_shelx_SHELXL_version_number       '2016/6'
_audit_contact_author_address      ?
_audit_contact_author_email        ?
_audit_contact_author_name         ''
_audit_contact_author_phone        ?
_publ_contact_author_id_orcid      ?
_publ_section_references
;
Dolomanov, O.V., Bourhis, L.J., Gildea, R.J, Howard, J.A.K. & Puschmann, H.
 (2009), J. Appl. Cryst. 42, 339-341.

Sheldrick, G.M. (2008). Acta Cryst. A64, 112-122.
;
_chemical_name_common              ?
_chemical_name_systematic          ?
_chemical_formula_moiety           'C22 H17 Cu I N3 O, O'
_chemical_formula_sum              'C22 H17 Cu I N3 O2'
_chemical_formula_weight           545.82
_chemical_melting_point            ?
loop_
  _atom_type_symbol
  _atom_type_description
  _atom_type_scat_dispersion_real
  _atom_type_scat_dispersion_imag
  _atom_type_scat_source
 'C' 'C' 0.0033 0.0016 'International Tables Vol C Tables 4.2.6.8 and 6.1.1.4'
 'H' 'H' 0.0000 0.0000 'International Tables Vol C Tables 4.2.6.8 and 6.1.1.4'
 'Cu' 'Cu' 0.3201 1.2651 'International Tables Vol C Tables 4.2.6.8 and 6.1.1.4'
 'I' 'I' -0.4742 1.8119 'International Tables Vol C Tables 4.2.6.8 and 6.1.1.4'
 'N' 'N' 0.0061 0.0033 'International Tables Vol C Tables 4.2.6.8 and 6.1.1.4'
 'O' 'O' 0.0106 0.0060 'International Tables Vol C Tables 4.2.6.8 and 6.1.1.4'

_shelx_space_group_comment
;
The symmetry employed for this shelxl refinement is uniquely defined
by the following loop, which should always be used as a source of
symmetry information in preference to the above space-group names.
They are only intended as comments.
;
_space_group_crystal_system        'monoclinic'
_space_group_IT_number             15
_space_group_name_H-M_alt          'C 1 2/c 1'
_space_group_name_Hall             '-C 2yc'
loop_
  _space_group_symop_operation_xyz
 'x, y, z'
 '-x, y, -z+1/2'
 'x+1/2, y+1/2, z'
 '-x+1/2, y+1/2, -z+1/2'
 '-x, -y, -z'
 'x, -y, z-1/2'
 '-x+1/2, -y+1/2, -z'
 'x+1/2, -y+1/2, z-1/2'

_cell_length_a                     24.184(10)
_cell_length_b                     12.642(6)
_cell_length_c                     17.903(8)
_cell_angle_alpha                  90
_cell_angle_beta                   113.189(4)
_cell_angle_gamma                  90
_cell_volume                       5031(4)
_cell_formula_units_Z              8
_cell_measurement_reflns_used      1846
_cell_measurement_temperature      100(2)
_cell_measurement_theta_max        19.213
_cell_measurement_theta_min        2.475
_shelx_estimated_absorpt_T_max     ?
_shelx_estimated_absorpt_T_min     ?
_exptl_absorpt_coefficient_mu      2.114
_exptl_absorpt_correction_T_max    0.7452
_exptl_absorpt_correction_T_min    0.5821
_exptl_absorpt_correction_type     multi-scan
_exptl_absorpt_process_details    
 'SADABS-2014/4 (Bruker,2014/4) was used for absorption correction. wR2(int) was 0.0804 before and 0.0496 after correction. The Ratio of minimum to maximum transmission is 0.7811. The \l/2 correction factor is 0.00150.'
_exptl_absorpt_special_details     ?
_exptl_crystal_colour              'clear dark black'
_exptl_crystal_colour_lustre       clear
_exptl_crystal_colour_modifier     dark
_exptl_crystal_colour_primary      black
_exptl_crystal_density_diffrn      1.441
_exptl_crystal_density_meas        ?
_exptl_crystal_density_method      ?
_exptl_crystal_description         block
_exptl_crystal_F_000               2144
_exptl_crystal_size_max            0.23
_exptl_crystal_size_mid            0.21
_exptl_crystal_size_min            0.2
_exptl_transmission_factor_max     ?
_exptl_transmission_factor_min     ?
_diffrn_reflns_av_R_equivalents    0.1309
_diffrn_reflns_av_unetI/netI       0.1446
_diffrn_reflns_Laue_measured_fraction_full  0.993
_diffrn_reflns_Laue_measured_fraction_max  0.988
_diffrn_reflns_limit_h_max         24
_diffrn_reflns_limit_h_min         -29
_diffrn_reflns_limit_k_max         15
_diffrn_reflns_limit_k_min         -15
_diffrn_reflns_limit_l_max         21
_diffrn_reflns_limit_l_min         -21
_diffrn_reflns_number              14932
_diffrn_reflns_point_group_measured_fraction_full  0.993
_diffrn_reflns_point_group_measured_fraction_max  0.988
_diffrn_reflns_theta_full          25.242
_diffrn_reflns_theta_max           25.566
_diffrn_reflns_theta_min           1.832
_diffrn_ambient_temperature        100
_diffrn_detector_area_resol_mean   ?
_diffrn_measured_fraction_theta_full  0.993
_diffrn_measured_fraction_theta_max  0.988
_diffrn_measurement_device_type    'Bruker APEX-II CCD'
_diffrn_measurement_method         '\f and \w scans'
_diffrn_radiation_type             MoK\a
_diffrn_radiation_wavelength       0.71073
_diffrn_source                     ?
_reflns_Friedel_coverage           0.000
_reflns_Friedel_fraction_full      .
_reflns_Friedel_fraction_max       .
_reflns_number_gt                  2052
_reflns_number_total               4667
_reflns_special_details
;
 Reflections were merged by SHELXL according to the crystal
 class for the calculation of statistics and refinement.
 
 _reflns_Friedel_fraction is defined as the number of unique
 Friedel pairs measured divided by the number that would be
 possible theoretically, ignoring centric projections and
 systematic absences.
;
_reflns_threshold_expression       'I > 2\s(I)'
_computing_cell_refinement         'SAINT v8.34A (Bruker, 2013)'
_computing_data_collection         ?
_computing_data_reduction          'SAINT v8.34A (Bruker, 2013)'
_computing_molecular_graphics      'Olex2 (Dolomanov et al., 2009)'
_computing_publication_material    'Olex2 (Dolomanov et al., 2009)'
_computing_structure_refinement    'XL (Sheldrick, 2008)'
_computing_structure_solution      'ShelXS (Sheldrick, 2008)'
_refine_diff_density_max           1.318
_refine_diff_density_min           -0.737
_refine_diff_density_rms           0.183
_refine_ls_extinction_coef         .
_refine_ls_extinction_method       none
_refine_ls_goodness_of_fit_ref     1.023
_refine_ls_hydrogen_treatment      constr
_refine_ls_matrix_type             full
_refine_ls_number_parameters       272
_refine_ls_number_reflns           4667
_refine_ls_number_restraints       0
_refine_ls_R_factor_all            0.1894
_refine_ls_R_factor_gt             0.0729
_refine_ls_restrained_S_all        1.023
_refine_ls_shift/su_max            0.000
_refine_ls_shift/su_mean           0.000
_refine_ls_structure_factor_coef   Fsqd
_refine_ls_weighting_details      
 'w=1/[\s^2^(Fo^2^)+(0.1251P)^2^] where P=(Fo^2^+2Fc^2^)/3'
_refine_ls_weighting_scheme        calc
_refine_ls_wR_factor_gt            0.2030
_refine_ls_wR_factor_ref           0.2534
_refine_special_details            ?
_olex2_refinement_description
;
1. Fixed Uiso
 At 1.2 times of:
  All C(H) groups
 At 1.5 times of:
  All C(H,H,H) groups
2. Others
 Fixed Sof: O2B(0.3267) O2A(0.6733)
3.a Aromatic/amide H refined with riding coordinates:
 C9(H9), C15(H15), C12(H12), C7(H7), C13(H13), C14(H14), C1(H1), C17(H17),
 C21(H21), C2(H2), C18(H18), C4(H4), C5(H5), C20(H20)
3.b Idealised Me refined as rotating group:
 C22(H22A,H22B,H22C)
;
_atom_sites_solution_hydrogens     geom
_atom_sites_solution_primary       ?
_atom_sites_solution_secondary     ?
loop_
  _atom_site_label
  _atom_site_type_symbol
  _atom_site_fract_x
  _atom_site_fract_y
  _atom_site_fract_z
  _atom_site_U_iso_or_equiv
  _atom_site_adp_type
  _atom_site_occupancy
  _atom_site_site_symmetry_order
  _atom_site_calc_flag
  _atom_site_refinement_flags_posn
  _atom_site_refinement_flags_adp
  _atom_site_refinement_flags_occupancy
  _atom_site_disorder_assembly
  _atom_site_disorder_group
 I1 I 0.45493(4) 1.14316(8) 0.53487(5) 0.0698(4) Uani 1 1 d . . . . .
 Cu1 Cu 0.50159(6) 0.94963(13) 0.56493(8) 0.0587(5) Uani 1 1 d . . . . .
 N3 N 0.0693(4) 0.5487(8) 0.1759(5) 0.053(3) Uani 1 1 d . . . . .
 N2 N 0.2533(4) 0.6128(8) 0.4324(5) 0.052(3) Uani 1 1 d . . . . .
 N1 N 0.4316(4) 0.8537(8) 0.5518(6) 0.058(3) Uani 1 1 d . . . . .
 C8 C 0.2648(5) 0.4422(10) 0.5414(6) 0.047(3) Uani 1 1 d . . . . .
 C10 C 0.2121(5) 0.5302(10) 0.4143(6) 0.048(3) Uani 1 1 d . . . . .
 O1 O 0.2910(7) 0.1274(9) 0.7764(6) 0.105(4) Uani 1 1 d . . . . .
 C11 C 0.1610(4) 0.5386(10) 0.3312(6) 0.047(3) Uani 1 1 d . . . . .
 C9 C 0.2167(5) 0.4477(10) 0.4669(6) 0.048(3) Uani 1 1 d . . . . .
 H9 H 0.187321 0.395403 0.452124 0.058 Uiso 1 1 calc R . . . .
 C6 C 0.2999(5) 0.6073(9) 0.5058(6) 0.045(3) Uani 1 1 d . . . . .
 C16 C 0.2715(6) 0.3564(10) 0.5996(7) 0.053(3) Uani 1 1 d . . . . .
 C15 C 0.1631(5) 0.6118(10) 0.2748(7) 0.057(3) Uani 1 1 d . . . . .
 H15 H 0.195115 0.658775 0.287811 0.069 Uiso 1 1 calc R . . . .
 C12 C 0.1127(5) 0.4725(10) 0.3106(7) 0.058(3) Uani 1 1 d . . . . .
 H12 H 0.109566 0.423656 0.347585 0.069 Uiso 1 1 calc R . . . .
 C7 C 0.3061(5) 0.5265(10) 0.5606(6) 0.054(3) Uani 1 1 d . . . . .
 H7 H 0.338055 0.528002 0.611096 0.064 Uiso 1 1 calc R . . . .
 C13 C 0.0678(5) 0.4805(12) 0.2321(8) 0.070(4) Uani 1 1 d . . . . .
 H13 H 0.034827 0.435532 0.218154 0.084 Uiso 1 1 calc R . . . .
 C3 C 0.3435(5) 0.6935(11) 0.5231(7) 0.057(3) Uani 1 1 d . . . . .
 C14 C 0.1172(6) 0.6136(11) 0.1995(7) 0.063(4) Uani 1 1 d . . . . .
 H14 H 0.119198 0.663023 0.162223 0.076 Uiso 1 1 calc R . . . .
 C1 C 0.3831(6) 0.8477(12) 0.4819(8) 0.079(5) Uani 1 1 d . . . . .
 H1 H 0.378301 0.898658 0.442337 0.094 Uiso 1 1 calc R . . . .
 C17 C 0.2239(6) 0.2935(11) 0.5956(7) 0.062(4) Uani 1 1 d . . . . .
 H17 H 0.187211 0.304426 0.552337 0.074 Uiso 1 1 calc R . . . .
 C19 C 0.2814(9) 0.2009(12) 0.7161(8) 0.079(5) Uani 1 1 d . . . . .
 C21 C 0.3266(7) 0.3354(12) 0.6654(8) 0.086(5) Uani 1 1 d . . . . .
 H21 H 0.360100 0.375859 0.670893 0.103 Uiso 1 1 calc R . . . .
 C2 C 0.3395(6) 0.7691(13) 0.4654(8) 0.083(5) Uani 1 1 d . . . . .
 H2 H 0.307414 0.767417 0.415057 0.099 Uiso 1 1 calc R . . . .
 C18 C 0.2265(7) 0.2146(11) 0.6514(9) 0.075(4) Uani 1 1 d . . . . .
 H18 H 0.193164 0.173361 0.645554 0.090 Uiso 1 1 calc R . . . .
 C4 C 0.3909(6) 0.7071(13) 0.5970(8) 0.088(5) Uani 1 1 d . . . . .
 H4 H 0.395069 0.661844 0.639851 0.105 Uiso 1 1 calc R . . . .
 C5 C 0.4312(6) 0.7853(12) 0.6080(8) 0.081(5) Uani 1 1 d . . . . .
 H5 H 0.461536 0.792002 0.659572 0.097 Uiso 1 1 calc R . . . .
 C20 C 0.3325(8) 0.2578(14) 0.7209(8) 0.096(5) Uani 1 1 d . . . . .
 H20 H 0.369874 0.242884 0.761483 0.115 Uiso 1 1 calc R . . . .
 C22 C 0.2418(9) 0.0586(15) 0.7691(12) 0.119(7) Uani 1 1 d . . . . .
 H22A H 0.234563 0.010409 0.724796 0.178 Uiso 1 1 calc GR . . . .
 H22B H 0.206276 0.100110 0.758961 0.178 Uiso 1 1 calc GR . . . .
 H22C H 0.251541 0.019433 0.818578 0.178 Uiso 1 1 calc GR . . . .
 O2B O 0.570(2) 0.599(3) 0.594(3) 0.155(17) Uani 0.3267 1 d . . P A 1
 O2A O 0.5512(11) 0.573(2) 0.7072(17) 0.211(12) Uani 0.6733 1 d . . P B 2

loop_
  _atom_site_aniso_label
  _atom_site_aniso_U_11
  _atom_site_aniso_U_22
  _atom_site_aniso_U_33
  _atom_site_aniso_U_23
  _atom_site_aniso_U_13
  _atom_site_aniso_U_12
 I1 0.0579(6) 0.0861(8) 0.0643(6) 0.0027(5) 0.0229(4) 0.0109(5)
 Cu1 0.0402(8) 0.0796(12) 0.0453(8) -0.0007(8) 0.0050(6) -0.0095(8)
 N3 0.037(5) 0.072(7) 0.038(5) 0.010(5) 0.002(4) -0.001(6)
 N2 0.044(6) 0.067(8) 0.042(5) -0.001(5) 0.012(5) -0.006(5)
 N1 0.039(5) 0.079(8) 0.042(5) 0.007(6) 0.001(5) -0.011(5)
 C8 0.048(7) 0.067(9) 0.025(5) -0.003(6) 0.013(5) 0.001(7)
 C10 0.034(6) 0.074(9) 0.035(6) 0.000(6) 0.011(5) 0.000(7)
 O1 0.179(13) 0.080(8) 0.064(6) 0.023(6) 0.058(8) 0.029(8)
 C11 0.031(6) 0.071(9) 0.036(6) -0.001(6) 0.009(5) -0.001(6)
 C9 0.048(7) 0.050(8) 0.046(6) -0.009(6) 0.018(6) -0.007(6)
 C6 0.030(6) 0.059(8) 0.040(6) -0.004(6) 0.009(5) -0.008(6)
 C16 0.058(8) 0.054(8) 0.044(7) -0.003(7) 0.018(6) -0.006(7)
 C15 0.041(7) 0.080(10) 0.043(7) 0.010(7) 0.007(6) -0.012(6)
 C12 0.037(7) 0.084(10) 0.042(6) 0.012(7) 0.004(5) -0.015(7)
 C7 0.042(7) 0.081(10) 0.031(6) 0.004(7) 0.006(5) -0.005(7)
 C13 0.041(7) 0.100(12) 0.060(8) 0.009(8) 0.009(6) -0.016(7)
 C3 0.052(8) 0.070(9) 0.045(7) 0.012(7) 0.015(6) -0.005(7)
 C14 0.062(9) 0.067(9) 0.054(8) -0.001(7) 0.016(7) -0.009(7)
 C1 0.062(9) 0.106(12) 0.049(7) 0.021(8) 0.004(7) -0.030(9)
 C17 0.062(9) 0.074(10) 0.047(7) 0.010(7) 0.019(6) 0.010(8)
 C19 0.152(16) 0.056(9) 0.045(8) 0.010(8) 0.057(10) 0.013(11)
 C21 0.075(10) 0.090(12) 0.057(8) 0.021(9) -0.012(7) -0.009(9)
 C2 0.056(9) 0.113(13) 0.057(8) 0.012(9) -0.001(7) -0.031(9)
 C18 0.090(11) 0.068(10) 0.081(10) 0.020(9) 0.049(9) 0.016(8)
 C4 0.079(10) 0.102(13) 0.051(8) 0.010(8) -0.008(7) -0.033(10)
 C5 0.071(10) 0.088(12) 0.048(8) 0.008(8) -0.015(7) -0.038(9)
 C20 0.111(14) 0.092(13) 0.053(9) 0.010(9) -0.004(8) -0.017(11)
 C22 0.163(19) 0.093(14) 0.141(17) 0.056(13) 0.104(15) 0.040(14)
 O2B 0.20(5) 0.09(3) 0.20(5) -0.04(3) 0.11(4) -0.05(3)
 O2A 0.15(2) 0.21(3) 0.22(3) 0.07(2) 0.019(19) 0.041(19)

_geom_special_details
;
 All esds (except the esd in the dihedral angle between two l.s. planes)
 are estimated using the full covariance matrix.  The cell esds are taken
 into account individually in the estimation of esds in distances, angles
 and torsion angles; correlations between esds in cell parameters are only
 used when they are defined by crystal symmetry.  An approximate (isotropic)
 treatment of cell esds is used for estimating esds involving l.s. planes.
;
loop_
  _geom_bond_atom_site_label_1
  _geom_bond_atom_site_label_2
  _geom_bond_distance
  _geom_bond_site_symmetry_2
  _geom_bond_publ_flag
 I1 Cu1 2.659(2) . ?
 I1 Cu1 2.6746(19) 5_676 ?
 Cu1 Cu1 2.625(3) 5_676 ?
 Cu1 N3 2.017(8) 8_566 ?
 Cu1 N1 2.019(10) . ?
 N3 C13 1.337(15) . ?
 N3 C14 1.343(15) . ?
 N2 C10 1.390(15) . ?
 N2 C6 1.355(13) . ?
 N1 C1 1.338(15) . ?
 N1 C5 1.329(16) . ?
 C8 C9 1.385(14) . ?
 C8 C16 1.469(16) . ?
 C8 C7 1.407(16) . ?
 C10 C11 1.518(14) . ?
 C10 C9 1.379(15) . ?
 O1 C19 1.372(16) . ?
 O1 C22 1.44(2) . ?
 C11 C15 1.385(16) . ?
 C11 C12 1.365(15) . ?
 C9 H9 0.9300 . ?
 C6 C7 1.383(15) . ?
 C6 C3 1.462(16) . ?
 C16 C17 1.376(17) . ?
 C16 C21 1.413(17) . ?
 C15 H15 0.9300 . ?
 C15 C14 1.368(16) . ?
 C12 H12 0.9300 . ?
 C12 C13 1.401(15) . ?
 C7 H7 0.9300 . ?
 C13 H13 0.9300 . ?
 C3 C2 1.383(17) . ?
 C3 C4 1.378(16) . ?
 C14 H14 0.9300 . ?
 C1 H1 0.9300 . ?
 C1 C2 1.394(18) . ?
 C17 H17 0.9300 . ?
 C17 C18 1.396(17) . ?
 C19 C18 1.39(2) . ?
 C19 C20 1.40(2) . ?
 C21 H21 0.9300 . ?
 C21 C20 1.363(19) . ?
 C2 H2 0.9300 . ?
 C18 H18 0.9300 . ?
 C4 H4 0.9300 . ?
 C4 C5 1.347(18) . ?
 C5 H5 0.9300 . ?
 C20 H20 0.9300 . ?
 C22 H22A 0.9600 . ?
 C22 H22B 0.9600 . ?
 C22 H22C 0.9600 . ?

loop_
  _geom_angle_atom_site_label_1
  _geom_angle_atom_site_label_2
  _geom_angle_atom_site_label_3
  _geom_angle
  _geom_angle_site_symmetry_1
  _geom_angle_site_symmetry_3
  _geom_angle_publ_flag
 Cu1 I1 Cu1 58.97(6) . 5_676 ?
 I1 Cu1 I1 121.03(6) . 5_676 ?
 Cu1 Cu1 I1 60.22(7) 5_676 5_676 ?
 Cu1 Cu1 I1 60.81(7) 5_676 . ?
 N3 Cu1 I1 107.8(3) 8_566 . ?
 N3 Cu1 I1 106.4(3) 8_566 5_676 ?
 N3 Cu1 Cu1 126.6(3) 8_566 5_676 ?
 N3 Cu1 N1 116.1(4) 8_566 . ?
 N1 Cu1 I1 105.1(3) . . ?
 N1 Cu1 I1 101.0(3) . 5_676 ?
 N1 Cu1 Cu1 117.2(3) . 5_676 ?
 C13 N3 Cu1 119.7(8) . 8_465 ?
 C13 N3 C14 115.6(9) . . ?
 C14 N3 Cu1 124.7(8) . 8_465 ?
 C6 N2 C10 115.7(10) . . ?
 C1 N1 Cu1 121.9(9) . . ?
 C5 N1 Cu1 124.0(8) . . ?
 C5 N1 C1 114.0(11) . . ?
 C9 C8 C16 122.4(11) . . ?
 C9 C8 C7 116.3(11) . . ?
 C7 C8 C16 121.2(9) . . ?
 N2 C10 C11 114.1(10) . . ?
 C9 C10 N2 123.4(9) . . ?
 C9 C10 C11 122.5(11) . . ?
 C19 O1 C22 117.3(14) . . ?
 C15 C11 C10 120.8(10) . . ?
 C12 C11 C10 120.1(11) . . ?
 C12 C11 C15 119.0(10) . . ?
 C8 C9 H9 119.8 . . ?
 C10 C9 C8 120.5(11) . . ?
 C10 C9 H9 119.8 . . ?
 N2 C6 C7 122.8(10) . . ?
 N2 C6 C3 115.0(10) . . ?
 C7 C6 C3 122.2(10) . . ?
 C17 C16 C8 122.3(11) . . ?
 C17 C16 C21 115.5(12) . . ?
 C21 C16 C8 122.2(12) . . ?
 C11 C15 H15 120.6 . . ?
 C14 C15 C11 118.7(11) . . ?
 C14 C15 H15 120.6 . . ?
 C11 C12 H12 121.0 . . ?
 C11 C12 C13 118.0(11) . . ?
 C13 C12 H12 121.0 . . ?
 C8 C7 H7 119.4 . . ?
 C6 C7 C8 121.2(10) . . ?
 C6 C7 H7 119.4 . . ?
 N3 C13 C12 124.2(11) . . ?
 N3 C13 H13 117.9 . . ?
 C12 C13 H13 117.9 . . ?
 C2 C3 C6 121.6(11) . . ?
 C4 C3 C6 123.7(12) . . ?
 C4 C3 C2 114.7(13) . . ?
 N3 C14 C15 124.4(12) . . ?
 N3 C14 H14 117.8 . . ?
 C15 C14 H14 117.8 . . ?
 N1 C1 H1 118.3 . . ?
 N1 C1 C2 123.3(12) . . ?
 C2 C1 H1 118.3 . . ?
 C16 C17 H17 117.5 . . ?
 C16 C17 C18 125.0(12) . . ?
 C18 C17 H17 117.5 . . ?
 O1 C19 C18 123.5(17) . . ?
 O1 C19 C20 115.3(16) . . ?
 C18 C19 C20 121.2(13) . . ?
 C16 C21 H21 118.8 . . ?
 C20 C21 C16 122.4(15) . . ?
 C20 C21 H21 118.8 . . ?
 C3 C2 C1 120.7(12) . . ?
 C3 C2 H2 119.7 . . ?
 C1 C2 H2 119.7 . . ?
 C17 C18 H18 121.8 . . ?
 C19 C18 C17 116.4(14) . . ?
 C19 C18 H18 121.8 . . ?
 C3 C4 H4 119.6 . . ?
 C5 C4 C3 120.8(14) . . ?
 C5 C4 H4 119.6 . . ?
 N1 C5 C4 126.0(11) . . ?
 N1 C5 H5 117.0 . . ?
 C4 C5 H5 117.0 . . ?
 C19 C20 H20 120.4 . . ?
 C21 C20 C19 119.2(15) . . ?
 C21 C20 H20 120.4 . . ?
 O1 C22 H22A 109.5 . . ?
 O1 C22 H22B 109.5 . . ?
 O1 C22 H22C 109.5 . . ?
 H22A C22 H22B 109.5 . . ?
 H22A C22 H22C 109.5 . . ?
 H22B C22 H22C 109.5 . . ?

_shelx_res_file
;
TITL 1z.res in C2/c
    1z.res
    created by SHELXL-2016/6 at 14:52:51 on 15-Mar-2019
REM Old TITL SKPYNH2_0m in C2/c
REM SHELXT solution in C2/c
REM R1 0.227, Rweak 0.033, Alpha 0.074, Orientation as input
REM Formula found by SHELXT: C14 N8 Cu I
CELL 0.71073 24.1844 12.6419 17.9029 90 113.189 90
ZERR 8 0.0102 0.0055 0.0077 0 0.004 0
LATT 7
SYMM -X,+Y,0.5-Z
SFAC C H Cu I N O
UNIT 176 136 8 8 24 16

L.S. 7
PLAN  20
TEMP 23
BOND $H
htab
fmap 2
acta
REM <olex2.extras>
REM <HklSrc "%.\\1z.hkl">
REM </olex2.extras>

WGHT    0.125100
FVAR       0.18548
I1    4    0.454934    1.143164    0.534874    11.00000    0.05792    0.08605 =
         0.06425    0.00274    0.02286    0.01091
CU1   3    0.501585    0.949630    0.564925    11.00000    0.04018    0.07965 =
         0.04532   -0.00075    0.00503   -0.00954
N3    5    0.069332    0.548738    0.175865    11.00000    0.03669    0.07212 =
         0.03832    0.01019    0.00202   -0.00056
N2    5    0.253273    0.612778    0.432412    11.00000    0.04355    0.06747 =
         0.04168   -0.00127    0.01229   -0.00593
N1    5    0.431627    0.853674    0.551811    11.00000    0.03870    0.07948 =
         0.04193    0.00691    0.00116   -0.01080
C8    1    0.264846    0.442220    0.541435    11.00000    0.04831    0.06651 =
         0.02541   -0.00286    0.01340    0.00131
C10   1    0.212116    0.530170    0.414308    11.00000    0.03359    0.07391 =
         0.03506   -0.00036    0.01056   -0.00004
O1    6    0.291036    0.127450    0.776415    11.00000    0.17943    0.08014 =
         0.06424    0.02274    0.05811    0.02949
C11   1    0.161031    0.538567    0.331164    11.00000    0.03075    0.07099 =
         0.03603   -0.00109    0.00892   -0.00061
C9    1    0.216731    0.447704    0.466866    11.00000    0.04815    0.05043 =
         0.04571   -0.00855    0.01832   -0.00657
AFIX  43
H9    2    0.187321    0.395403    0.452124    11.00000   -1.20000
AFIX   0
C6    1    0.299906    0.607335    0.505807    11.00000    0.03029    0.05922 =
         0.03957   -0.00362    0.00872   -0.00756
C16   1    0.271456    0.356383    0.599648    11.00000    0.05767    0.05417 =
         0.04445   -0.00315    0.01802   -0.00599
C15   1    0.163103    0.611754    0.274769    11.00000    0.04095    0.08027 =
         0.04259    0.01043    0.00734   -0.01240
AFIX  43
H15   2    0.195115    0.658775    0.287811    11.00000   -1.20000
AFIX   0
C12   1    0.112657    0.472523    0.310589    11.00000    0.03689    0.08424 =
         0.04191    0.01223    0.00440   -0.01457
AFIX  43
H12   2    0.109566    0.423656    0.347585    11.00000   -1.20000
AFIX   0
C7    1    0.306066    0.526543    0.560620    11.00000    0.04200    0.08093 =
         0.03053    0.00394    0.00631   -0.00458
AFIX  43
H7    2    0.338055    0.528002    0.611096    11.00000   -1.20000
AFIX   0
C13   1    0.067790    0.480538    0.232067    11.00000    0.04066    0.09950 =
         0.05976    0.00898    0.00932   -0.01601
AFIX  43
H13   2    0.034827    0.435532    0.218154    11.00000   -1.20000
AFIX   0
C3    1    0.343512    0.693498    0.523141    11.00000    0.05206    0.07012 =
         0.04482    0.01151    0.01498   -0.00474
C14   1    0.117167    0.613568    0.199517    11.00000    0.06206    0.06703 =
         0.05354   -0.00089    0.01619   -0.00908
AFIX  43
H14   2    0.119198    0.663023    0.162223    11.00000   -1.20000
AFIX   0
C1    1    0.383142    0.847730    0.481913    11.00000    0.06246    0.10648 =
         0.04946    0.02082    0.00361   -0.02970
AFIX  43
H1    2    0.378301    0.898658    0.442337    11.00000   -1.20000
AFIX   0
C17   1    0.223896    0.293500    0.595598    11.00000    0.06165    0.07405 =
         0.04713    0.00953    0.01904    0.00951
AFIX  43
H17   2    0.187211    0.304426    0.552337    11.00000   -1.20000
AFIX   0
C19   1    0.281393    0.200906    0.716136    11.00000    0.15234    0.05639 =
         0.04499    0.01014    0.05738    0.01343
C21   1    0.326605    0.335360    0.665353    11.00000    0.07455    0.08985 =
         0.05689    0.02071   -0.01227   -0.00921
AFIX  43
H21   2    0.360100    0.375859    0.670893    11.00000   -1.20000
AFIX   0
C2    1    0.339525    0.769074    0.465413    11.00000    0.05621    0.11331 =
         0.05667    0.01159   -0.00100   -0.03077
AFIX  43
H2    2    0.307414    0.767417    0.415057    11.00000   -1.20000
AFIX   0
C18   1    0.226481    0.214569    0.651434    11.00000    0.08974    0.06755 =
         0.08142    0.02026    0.04898    0.01569
AFIX  43
H18   2    0.193164    0.173361    0.645554    11.00000   -1.20000
AFIX   0
C4    1    0.390881    0.707137    0.597021    11.00000    0.07883    0.10195 =
         0.05102    0.01024   -0.00772   -0.03307
AFIX  43
H4    2    0.395069    0.661844    0.639851    11.00000   -1.20000
AFIX   0
C5    1    0.431208    0.785289    0.607975    11.00000    0.07062    0.08847 =
         0.04798    0.00778   -0.01469   -0.03790
AFIX  43
H5    2    0.461536    0.792002    0.659572    11.00000   -1.20000
AFIX   0
C20   1    0.332454    0.257845    0.720895    11.00000    0.11069    0.09157 =
         0.05265    0.00965   -0.00396   -0.01709
AFIX  43
H20   2    0.369874    0.242884    0.761483    11.00000   -1.20000
AFIX   0
C22   1    0.241750    0.058620    0.769076    11.00000    0.16324    0.09267 =
         0.14090    0.05640    0.10374    0.04009
AFIX 137
H22A  2    0.234563    0.010409    0.724796    11.00000   -1.50000
H22B  2    0.206276    0.100110    0.758961    11.00000   -1.50000
H22C  2    0.251541    0.019433    0.818578    11.00000   -1.50000
AFIX   0

PART 1
O2B   6    0.570144    0.598926    0.593629    10.32670    0.20189    0.08763 =
         0.20271   -0.03630    0.10961   -0.04821

PART 0
PART 2
O2A   6    0.551163    0.573152    0.707175    10.67330    0.15203    0.21177 =
         0.21967    0.06652    0.01898    0.04122
HKLF 4


REM  1z.res in C2/c
REM R1 =  0.0729 for    2052 Fo > 4sig(Fo)  and  0.1894 for all    4667 data
REM    272 parameters refined using      0 restraints

END

WGHT      0.1251      0.0000

REM Instructions for potential hydrogen bonds
EQIV $4 -x+1/2, -y+3/2, -z+1
HTAB C12 I1_$4
EQIV $2 x-1/2, -y+3/2, z-1/2
HTAB C13 I1_$2
EQIV $5 -x+1/2, y-1/2, -z+1/2
HTAB C14 I1_$5

REM Highest difference peak  1.318,  deepest hole -0.737,  1-sigma level  0.183
Q1    1   0.5308  0.4559  0.6546  11.00000  0.05    1.32
Q2    1   0.5000  0.4162  0.7500  10.50000  0.05    1.24
Q3    1   0.5399  0.4255  0.6108  11.00000  0.05    1.18
Q4    1   0.5818  0.5015  0.5572  11.00000  0.05    1.05
Q5    1   0.5086  0.3731  0.7013  11.00000  0.05    1.02
Q6    1   0.5725  0.5711  0.6574  11.00000  0.05    0.93
Q7    1   0.5967  0.6112  0.6233  11.00000  0.05    0.80
Q8    1   0.4907  1.1393  0.5813  11.00000  0.05    0.78
Q9    1   0.5412  0.5308  0.7371  11.00000  0.05    0.76
Q10   1   0.5445  0.6200  0.7090  11.00000  0.05    0.62
Q11   1   0.4623  0.9419  0.5245  11.00000  0.05    0.57
Q12   1   0.5372  0.9556  0.6177  11.00000  0.05    0.52
Q13   1   0.4913  0.8574  0.5095  11.00000  0.05    0.52
Q14   1   0.4068  0.9540  0.5043  11.00000  0.05    0.49
Q15   1   0.4289  1.0555  0.5239  11.00000  0.05    0.48
Q16   1   0.5010  0.7590  0.5590  11.00000  0.05    0.45
Q17   1   0.5089  0.5760  0.5230  11.00000  0.05    0.42
Q18   1   0.4103  1.1456  0.5820  11.00000  0.05    0.38
Q19   1   0.0887  0.4485  0.3662  11.00000  0.05    0.37
Q20   1   0.4537  1.0405  0.5796  11.00000  0.05    0.37
;
_shelx_res_checksum                99934
_shelx_hkl_file
;
  -2   0   0 3108.89   21.80
  -2   0   0 3018.30   30.50
   4   0   0 7930.01   46.60
  -4   0   0 7930.21   69.89
  -6   0   0   38.60   13.10
   6   0   0   29.60   10.60
   8   0   0  382.56   20.70
  -8   0   0  413.46   30.00
  10   0   0  496.05   25.00
 -10   0   0  499.65   35.30
  12   0   0  101.49   17.00
 -12   0   0  107.79   24.30
  14   0   0   17.80   16.00
 -14   0   0   21.70   21.80
  16   0   0  179.38   26.90
 -16   0   0  180.58   34.40
 -18   0   0 1208.88   69.79
 -20   0   0  493.25   59.79
 -22   0   0  133.49   43.90
 -24   0   0  241.58   57.59
 -26   0   0  181.88   57.79
  -1  -1   0 6413.36   37.70
   1  -1   0 6734.33   45.10
   1   1   0 6431.96   35.40
  -1   1   0 6423.96   44.20
  -1   1   0 6433.36   29.00
  -3  -1   0 1507.35   26.50
   3   1   0 1497.85   22.40
  -3   1   0 1494.55   31.10
  -5  -1   0  325.57   21.10
  -5   1   0  286.67   22.60
   5   1   0  326.07   19.80
  -7  -1   0  173.38   20.50
   7   1   0  170.58   16.60
  -7   1   0  165.28   22.80
  -9  -1   0    3.00   13.10
  -9   1   0   15.20   15.50
   9   1   0   21.10   12.90
 -11  -1   0   20.00   15.60
  11   1   0   19.90   14.50
 -11   1   0   21.00   18.20
 -13  -1   0   55.29   20.90
 -13   1   0   35.50   21.20
  13   1   0   39.50   18.10
 -15  -1   0  233.58   36.20
  15   1   0  238.88   28.00
 -15   1   0  213.58   36.00
 -17  -1   0  383.16   46.60
  17   1   0  388.26   42.50
 -17   1   0  365.06   48.30
 -19  -1   0  673.63   60.89
 -19   1   0  685.53   63.59
 -21  -1   0    7.10   31.90
 -21   1   0   88.79   42.40
 -23  -1   0  205.58   50.49
 -23   1   0  203.88   52.09
 -25  -1   0   84.59   50.59
 -25   1   0   75.79   49.60
   0  -2   0 1808.62   31.90
   0   2   0 1718.33   24.40
   0   2   0 1812.62   29.40
  -2  -2   0 1103.19   26.80
   2  -2   0 1204.48   31.30
  -2   2   0 1192.98   29.10
   2   2   0 1138.79   23.80
  -2   2   0 1163.98   19.50
  -4  -2   0 1562.04   34.80
   4   2   0 1567.84   32.20
  -4   2   0 1520.05   28.00
  -4   2   0 1529.65   22.50
  -4   2   0 1531.45   39.30
  -6  -2   0  120.69   17.10
   6   2   0  117.09   15.30
  -6   2   0   99.49   18.60
  -6   2   0   99.09   14.10
  -8  -2   0  660.63   32.70
   8   2   0  626.24   28.80
  -8   2   0  614.54   37.40
 -10  -2   0 1203.18   46.40
 -10   2   0 1183.78   52.49
  10   2   0 1183.38   39.10
 -12  -2   0  620.84   40.80
  12   2   0  542.15   34.80
 -12   2   0  560.14   44.70
 -14  -2   0  605.24   44.70
 -14   2   0  595.64   49.70
  14   2   0  598.64   40.60
 -16  -2   0  367.26   44.40
  16   2   0  403.46   43.30
 -16   2   0  403.66   48.70
 -18  -2   0   73.29   31.10
 -18   2   0   74.49   32.50
  18   2   0   38.70   30.40
 -20  -2   0   53.99   33.80
 -20   2   0   69.19   40.40
 -22  -2   0   20.40   36.00
 -22   2   0   80.99   43.00
 -24  -2   0   31.80   41.20
 -24   2   0   13.80   34.80
 -24   2   0   30.80   45.00
 -26   2   0   18.10   38.70
 -26   2   0   -4.30   47.40
  -1  -3   0 1124.09   41.20
   1  -3   0 1156.58   41.70
  -1   3   0 1123.19   26.10
   1   3   0 1121.19   28.50
  -1   3   0 1085.29   32.00
  -3  -3   0  587.34   32.10
   3  -3   0  476.85   35.90
  -3   3   0  526.65   19.20
  -3   3   0  476.05   26.60
   3   3   0  531.65   26.00
  -5  -3   0  129.69   18.90
  -5   3   0   95.29   10.40
   5   3   0  144.09   17.00
  -5   3   0  110.19   18.80
  -7  -3   0 1470.85   43.70
  -7   3   0 1564.74   52.59
   7   3   0 1492.55   40.30
  -7   3   0 1486.25   36.20
  -9  -3   0 1939.11   54.09
  -9   3   0 1948.80   46.50
  -9   3   0 1940.21   63.69
   9   3   0 1920.61   47.90
 -11  -3   0 2247.98   63.79
  11   3   0 2218.68   54.99
 -11   3   0 2227.48   54.49
 -11   3   0 2284.77   74.49
 -13  -3   0 1783.82   64.39
 -13   3   0 1828.52   55.19
  13   3   0 1798.62   55.69
 -13   3   0 1812.62   73.39
 -15  -3   0  325.67   42.10
 -15   3   0  292.77   43.70
 -15   3   0  364.06   36.20
  15   3   0  298.37   34.40
 -17  -3   0   27.50   27.50
 -17   3   0   41.40   25.70
 -17   3   0   54.99   32.10
  17   3   0   35.20   30.60
 -19  -3   0    0.40   28.00
 -19   3   0  -12.00   26.10
  19   3   0  -16.40   32.40
 -19   3   0   -8.40   32.70
 -21  -3   0   35.20   34.80
 -21   3   0   53.19   33.90
 -21   3   0   59.29   41.80
 -23  -3   0   58.59   40.70
 -23   3   0    9.90   41.60
 -23   3   0    8.00   34.90
 -25   3   0   45.20   46.60
 -25   3   0    4.40   38.60
   0  -4   0 1966.60   53.69
   0   4   0 1943.21   38.50
   0   4   0 1951.10   44.00
  -2  -4   0  874.11   42.20
   2  -4   0  880.71   43.70
  -2   4   0  908.41   35.00
  -2   4   0  862.01   26.40
   2   4   0  858.51   30.70
   4  -4   0  219.98   28.70
  -4  -4   0  260.47   31.70
   4   4   0  229.88   24.00
  -4   4   0  240.88   25.60
  -4   4   0  243.78   18.30
  -6  -4   0  440.96   33.50
   6  -4   0  422.56   40.50
  -6   4   0  451.95   20.50
   6   4   0  443.56   30.10
  -6   4   0  492.25   34.40
  -8  -4   0  617.94   38.00
  -8   4   0  586.64   23.00
  -8   4   0  656.53   42.60
   8   4   0  580.14   36.80
 -10  -4   0 1451.45   53.99
  10   4   0 1517.25   50.29
 -10   4   0 1445.36   62.19
 -12  -4   0 1113.89   53.69
 -12   4   0 1131.69   61.59
 -12   4   0 1187.38   45.30
  12   4   0 1199.98   50.79
 -14  -4   0  716.33   49.80
 -14   4   0  706.13   57.19
 -14   4   0  612.54   41.40
  14   4   0  735.63   50.29
 -16  -4   0   15.20   24.50
 -16   4   0   24.30   29.20
  16   4   0    5.30   31.10
 -16   4   0   26.10   23.80
 -18  -4   0   10.30   28.10
 -18   4   0    4.40   26.90
  18   4   0  -27.70   31.20
 -18   4   0  -16.00   31.50
 -20  -4   0   76.89   37.80
  20   4   0   87.79   46.50
 -20   4   0   73.89   34.70
 -20   4   0   57.59   42.50
 -22  -4   0   63.29   44.10
 -22   4   0   44.00   36.50
 -22   4   0   70.49   47.10
 -24   4   0   23.80   37.70
 -24   4   0  104.39   50.89
 -26   4   0   56.19   52.49
  -1  -5   0   63.89   27.50
   1  -5   0   38.60   25.80
  -1   5   0   57.19   18.00
   1   5   0   33.10   14.50
  -1   5   0   34.70   13.30
  -3  -5   0   87.99   26.90
   3  -5   0   49.99   25.70
  -3   5   0   45.50   13.30
  -3   5   0   26.40   15.40
   3   5   0   25.90   15.60
   5  -5   0   12.00   23.10
  -5  -5   0   11.50   23.20
  -5   5   0   -7.70   15.20
   5   5   0   -9.80   15.70
  -5   5   0   24.80   11.20
  -7  -5   0  149.49   27.50
   7  -5   0  155.28   33.50
   7   5   0  152.68   23.60
  -7   5   0  148.49   16.10
  -7   5   0  175.38   28.60
   9  -5   0  122.69   34.00
  -9  -5   0   67.39   23.60
  -9   5   0  135.69   28.10
  -9   5   0   92.09   13.20
   9   5   0   90.39   22.90
 -11  -5   0    7.40   22.80
 -11   5   0    8.80   21.20
  11   5   0   22.20   22.70
 -13  -5   0   63.99   27.30
  13   5   0   35.50   27.40
 -13   5   0   71.79   30.50
 -15  -5   0   20.30   26.30
  15   5   0    1.80   31.00
 -15   5   0  -30.70   26.10
 -17  -5   0   41.30   30.90
 -17   5   0   -9.10   26.30
  17   5   0   34.00   35.00
 -17   5   0   14.10   33.70
 -19  -5   0   15.50   34.70
 -19   5   0   -8.40   37.00
  19   5   0   -9.30   33.80
 -19   5   0   -9.60   30.70
 -21   5   0   75.69   45.40
 -21   5   0   54.39   33.70
 -23   5   0   48.40   45.30
 -23   5   0  -17.70   39.00
 -25   5   0  -35.00   41.30
 -25   5   0   74.89   52.29
   0  -6   0  241.38   37.80
   0   6   0  289.97   28.50
  -2  -6   0  261.27   37.80
   2  -6   0  249.28   39.40
  -2   6   0  306.97   27.80
   2   6   0  245.48   26.40
  -2   6   0  270.87   33.60
  -4  -6   0   46.40   31.70
   4  -6   0  -29.60   26.80
   4   6   0   -2.20   17.30
  -4   6   0   21.40   18.70
  -4   6   0   25.30   14.00
   6  -6   0   40.20   28.30
  -6  -6   0   90.29   30.10
  -6   6   0   52.39   21.50
  -6   6   0   47.90   14.90
   6   6   0   57.59   21.10
   8  -6   0  416.56   53.49
  -8  -6   0  503.35   46.10
  -8   6   0  414.46   26.10
  -8   6   0  468.05   42.40
   8   6   0  402.26   38.10
  10  -6   0  239.18   45.10
 -10  -6   0  212.88   34.60
 -10   6   0  260.57   21.90
  10   6   0  245.78   31.90
 -10   6   0  236.58   37.60
  12  -6   0  505.65   67.19
 -12  -6   0  555.34   51.19
  12   6   0  556.74   49.10
 -12   6   0  491.95   51.19
 -14  -6   0  158.58   36.90
  14  -6   0  114.99   48.70
 -14   6   0  138.79   36.70
  14   6   0  191.88   36.60
 -16  -6   0   42.10   32.70
  16   6   0   21.80   33.70
 -16   6   0   -9.40   33.60
 -18  -6   0   -6.90   32.10
 -18   6   0  -13.70   33.70
  18   6   0  -54.79   33.40
 -20   6   0   16.40   40.30
  20   6   0  -11.50   38.80
 -22   6   0   27.80   41.30
 -24   6   0   67.79   47.40
   1  -7   0  705.03   59.59
  -1  -7   0  724.23   61.19
  -1   7   0  570.24   41.90
   1   7   0  649.04   38.80
  -1   7   0  650.93   37.50
   3  -7   0   44.40   36.10
  -3  -7   0   72.49   37.40
   3   7   0  108.49   23.50
  -3   7   0  113.19   20.80
  -3   7   0   84.29   24.80
  -5  -7   0  180.88   38.90
   5  -7   0  137.79   37.90
  -5   7   0  177.78   21.90
   5   7   0  140.79   25.70
  -5   7   0  177.78   29.70
   7  -7   0  285.17   45.70
  -7  -7   0  255.87   40.50
   7   7   0  343.97   39.30
  -7   7   0  321.17   28.50
  -7   7   0  345.17   40.90
  -9  -7   0  808.62   59.69
   9  -7   0  845.42   69.39
   9   7   0  784.72   49.90
  -9   7   0  852.71   56.69
  -9   7   0  813.92   34.60
  11  -7   0  954.10   78.89
 -11  -7   0 1010.50   63.89
  11   7   0  980.00   56.29
 -11   7   0 1006.40   38.90
 -11   7   0  998.80   66.39
 -13  -7   0  755.52   62.79
  13  -7   0  733.53   80.09
  13   7   0  746.73   58.49
 -13   7   0  726.33   66.39
 -15  -7   0  120.89   40.20
  15  -7   0  134.89   51.99
 -15   7   0  147.79   44.10
  15   7   0  150.28   38.60
  17  -7   0   12.70   45.60
 -17  -7   0  -39.80   48.80
  17   7   0  -31.50   35.50
 -17   7   0   14.90   35.30
  19  -7   0   37.70   47.50
  19   7   0   -4.80   40.10
 -19   7   0    1.60   37.90
  21  -7   0  117.09   56.39
  21   7   0  -11.80   42.40
 -21   7   0   42.60   42.90
  23  -7   0  180.08   54.29
 -23   7   0    8.50   45.30
   0  -8   0    4.20   42.90
   0   8   0   22.80   20.70
  -2  -8   0    0.00   40.70
   2  -8   0  -32.80   39.30
  -2   8   0  -26.30   18.90
  -2   8   0    3.00   23.30
   2   8   0    4.70   19.60
   4  -8   0  105.39   45.60
  -4  -8   0  101.39   45.60
  -4   8   0   82.49   27.90
   4   8   0   68.39   24.90
  -4   8   0   85.49   23.10
   6  -8   0  119.09   45.20
  -6  -8   0  136.39   45.10
  -6   8   0  141.19   24.40
   6   8   0  157.88   30.30
  -6   8   0  139.29   32.60
  -8  -8   0  362.76   51.69
   8  -8   0  358.46   56.89
  -8   8   0  455.45   50.79
   8   8   0  468.85   45.80
  -8   8   0  431.56   34.70
  10  -8   0  355.46   58.09
 -10  -8   0  396.96   52.99
 -10   8   0  395.36   32.70
 -10   8   0  455.95   54.09
  10   8   0  492.75   51.99
  12  -8   0  294.17   58.89
 -12  -8   0  341.37   49.40
 -12   8   0  417.86   54.39
  12   8   0  328.87   43.50
  14  -8   0  248.38   57.39
 -14  -8   0  159.38   43.30
 -14   8   0  220.98   45.90
  14   8   0  184.58   41.40
  16  -8   0   61.89   52.49
  16   8   0  -23.70   38.00
 -16   8   0    0.10   32.70
  18  -8   0   83.89   53.19
  18   8   0   -4.20   40.20
 -18   8   0    7.20   38.20
  20  -8   0  147.19   57.49
 -20   8   0   55.79   47.20
  20   8   0    4.00   44.40
  22  -8   0  181.78   61.29
 -22   8   0   42.50   49.70
  22   8   0  -87.19   44.70
   1  -9   0  317.87   60.59
  -1  -9   0  272.87   58.59
  -1   9   0  394.06   41.10
   1   9   0  272.17   33.30
   3  -9   0  282.77   59.39
  -3  -9   0  304.67   59.39
  -3   9   0  287.97   33.90
   3   9   0  384.16   43.40
  -3   9   0  279.87   41.30
  -5  -9   0  195.78   55.29
   5  -9   0   24.20   52.39
  -5   9   0   80.59   25.80
  -5   9   0  132.29   36.00
   5   9   0  169.58   30.80
  -7  -9   0   60.19   50.09
   7  -9   0   31.00   52.89
  -7   9   0   43.80   30.00
  -7   9   0   -0.10   23.60
   7   9   0   53.99   29.50
  -9  -9   0   -0.10   46.70
   9  -9   0   54.29   50.99
  -9   9   0   88.79   34.70
   9   9   0   80.69   33.10
  -9   9   0   39.60   22.30
  11  -9   0  -18.80   47.80
 -11  -9   0  -24.50   41.40
  11   9   0   24.70   33.00
 -11   9   0   40.70   33.20
 -13  -9   0   11.70   50.89
  13  -9   0   40.70   46.20
 -13   9   0    9.50   31.70
  13   9   0   27.40   35.30
  15  -9   0  125.39   53.09
  15   9   0   37.20   39.50
 -15   9   0   39.70   36.40
  17  -9   0   90.99   53.99
 -17   9   0   -1.90   35.50
  17   9   0  -18.90   41.30
  19  -9   0  165.88   58.79
  19   9   0  -97.39   43.60
 -19   9   0   33.80   44.80
  21  -9   0  206.98   63.19
  21   9   0 -102.59   47.30
 -21   9   0   78.39   51.69
   0 -10   0  904.71   95.39
   0  10   0  874.91   55.59
  -2 -10   0  526.25   71.99
   2 -10   0  543.35   74.79
   2  10   0  693.33   53.39
  -2  10   0  631.64   51.79
  -4 -10   0  274.07   63.89
   4 -10   0  263.57   67.79
  -4  10   0  311.97   46.00
   4  10   0  254.77   37.40
  -4  10   0  237.28   35.10
   6 -10   0   71.19   65.69
  -6 -10   0   99.69   55.89
   6  10   0  -11.80   29.40
  -6  10   0   27.60   33.20
  -6  10   0    3.70   25.80
  -8 -10   0  -22.20   49.20
   8 -10   0  -13.80   53.79
  -8  10   0  -21.60   22.30
   8  10   0  -30.40   29.40
  -8  10   0  -27.50   27.90
 -10 -10   0  -74.99   44.70
  10 -10   0  117.39   55.89
 -10  10   0   14.90   30.10
  10  10   0  -31.80   32.30
  12 -10   0   32.80   55.49
  12  10   0  -60.69   34.50
 -12  10   0   44.70   35.10
  14 -10   0   96.49   56.79
 -14  10   0  -12.20   34.20
  14  10   0   -2.40   39.60
  16 -10   0  106.29   60.89
 -16  10   0   23.60   37.40
  16  10   0  -36.80   42.70
  18 -10   0  144.59   60.49
  18  10   0  -27.30   49.10
 -18  10   0   45.80   45.70
  20 -10   0  200.08   64.19
  20  10   0  -50.29   52.69
 -20  10   0   87.59   54.99
  -1 -11   0  385.36   71.19
   1 -11   0  423.36   75.59
   1  11   0  623.14   55.79
  -1  11   0  504.05   55.49
   3 -11   0  149.59   65.39
  -3 -11   0  182.38   65.29
  -3  11   0  154.58   38.00
   3  11   0   91.59   36.10
  -5 -11   0   21.70   58.89
   5 -11   0   93.19   64.09
  -5  11   0   48.50   39.80
   5  11   0    9.40   32.70
  -5  11   0   72.39   31.80
   7 -11   0  -38.40   55.39
  -7 -11   0 -132.59   51.79
   7  11   0  -62.39   32.20
  -7  11   0  -55.09   24.50
  -7  11   0  -13.70   34.60
   9 -11   0  -18.60   55.99
  -9 -11   0  -75.59   74.39
   9  11   0  -49.80   33.80
  -9  11   0   29.10   34.70
  11 -11   0   26.80   57.69
 -11  11   0   18.80   36.90
  11  11   0  -22.90   35.90
  13 -11   0   80.99   58.49
  13  11   0  -23.30   41.10
 -13  11   0    2.60   35.40
  15 -11   0  116.59   61.19
 -15  11   0   21.70   41.60
  15  11   0 -103.69   41.90
  17 -11   0  128.79   63.59
  17  11   0 -112.09   44.80
 -17  11   0   55.99   48.60
   0 -12   0  248.78   68.99
   0  12   0  268.37   44.90
  -2 -12   0  -64.99   63.89
   2 -12   0  -33.10   60.49
  -2  12   0   -8.00   34.20
   2  12   0  -23.80   34.40
  -4 -12   0  -49.50   61.79
   4 -12   0  107.79   63.69
  -4  12   0   36.30   32.90
   4  12   0   14.60   35.40
   6 -12   0   77.89   60.29
  -6 -12   0  -87.69   59.39
   6  12   0  -51.89   33.20
  -6  12   0  -32.00   30.40
  -6  12   0  -18.40   39.40
   8 -12   0   66.69   65.09
  -8  12   0   10.10   39.00
   8  12   0  -35.10   35.00
  10 -12   0   18.60   62.69
 -10  12   0   -3.80   38.30
  10  12   0  -38.90   37.90
  12 -12   0  131.19   66.89
 -12  12   0   45.60   40.30
  12  12   0  -78.69   40.50
  14 -12   0   66.29   64.69
  14  12   0  -50.89   45.10
 -14  12   0   -8.00   39.10
  16 -12   0  151.28   68.79
 -16  12   0   10.50   44.00
  16  12   0  -83.69   48.40
  -1 -13   0  -85.29   67.09
   1 -13   0  -32.40   66.89
   1  13   0  -42.90   38.50
  -1  13   0  -76.39   34.90
   3 -13   0   13.60   69.79
  -3 -13   0  -17.30   69.29
   3  13   0  -14.20   38.30
  -3  13   0  -52.89   34.20
   5 -13   0  -20.70   65.69
   5  13   0  -54.39   38.40
  -5  13   0  -31.20   32.70
   7 -13   0   61.49   66.19
   7  13   0  -52.59   39.00
  -7  13   0  -64.39   44.90
   9 -13   0  146.89   71.39
   9  13   0  -54.49   38.70
  -9  13   0   -6.10   44.90
  11 -13   0  136.49   71.19
 -11  13   0   -8.00   42.70
  11  13   0  -45.60   42.30
  13 -13   0  194.88   74.59
  13  13   0  -42.70   48.00
 -13  13   0   25.00   46.10
   0 -14   0  -61.89   73.49
   2 -14   0  -75.59   68.99
  -2 -14   0 -115.39   77.69
   2  14   0  -27.60   40.20
  -2  14   0  -31.20   37.60
   4 -14   0   73.29   75.49
   4  14   0  -62.79   41.00
  -4  14   0  -83.09   34.20
   6 -14   0   47.00   72.29
   6  14   0  -99.09   37.50
   8 -14   0  111.39   70.89
   8  14   0  -40.90   46.20
  10 -14   0  198.58   75.59
 -10  14   0  -64.29   50.09
  10  14   0 -100.49   46.40
   1 -15   0  -83.29   79.99
   1  15   0 -102.89   45.10
  -1  15   0 -103.79   37.90
   3 -15   0   -6.80   78.39
  -3  15   0  -90.99   38.10
   3  15   0  -63.09   45.50
 -26   0   1    0.20   45.40
 -24   0   1  -15.10   39.90
 -22   0   1    5.40   34.10
 -20   0   1    8.60   31.30
 -18   0   1    4.50   27.40
 -16   0   1   -2.40   21.20
 -14   0   1   21.70   20.30
 -12   0   1   -7.20   16.00
 -10   0   1   -4.60   14.30
  -8   0   1    7.20   13.20
  -6   0   1   14.90   11.80
  -4   0   1   -1.20    7.40
  -2   0   1   -0.70    3.60
   0   0  -1  -11.30    1.30
  -2   0  -1   -1.80    5.00
  -2   0  -1   -3.50    4.10
   2   0   1   -3.40    3.70
   4   0   1   28.90    8.30
  -4   0  -1   42.60    8.70
  -4   0  -1   31.60   10.30
   6   0   1   18.50   10.10
  -6   0  -1    5.90    8.50
  -6   0  -1    8.40   12.00
   8   0   1    2.50   10.00
  -8   0  -1   17.20   13.10
  10   0   1   -2.40   12.30
 -10   0  -1   20.10   15.50
 -12   0  -1   -0.50   15.90
  12   0   1   -2.00   14.10
 -14   0  -1  -10.30   19.20
  14   0   1  -20.20   17.30
 -16   0  -1    2.70   21.40
  16   0   1   46.70   22.90
 -18   0  -1   24.50   27.10
 -20   0  -1   29.40   33.40
 -22   0  -1    6.20   38.20
 -24   0  -1  -26.20   39.70
 -26   0  -1   36.30   47.70
 -27  -1   1   15.10   52.29
 -27   1   1    3.60   36.70
 -27   1   1   65.39   52.59
 -25  -1   1   60.99   47.90
 -25   1   1   24.10   45.30
 -23  -1   1   87.39   43.20
 -23   1   1  129.79   49.10
 -21  -1   1   31.00   35.30
 -21   1   1   71.29   37.40
 -19  -1   1   58.79   34.40
 -19   1   1   66.09   34.70
 -17  -1   1  530.55   51.39
  17   1  -1  581.44   42.40
 -17   1   1  560.54   53.39
 -15  -1   1  605.64   47.70
  15   1  -1  553.24   36.00
 -15   1   1  542.85   47.80
 -13  -1   1  578.54   41.80
  13   1  -1  603.04   31.50
 -13   1   1  656.43   46.50
 -11  -1   1   18.60   16.20
 -11   1   1    6.60   17.10
  11   1  -1   17.60   13.00
  -9  -1   1  237.38   26.40
  -9   1   1  237.98   29.00
   9   1  -1  246.98   20.20
  -7  -1   1 1416.66   40.90
  -7   1   1 1385.26   44.70
   7   1  -1 1439.36   29.20
  -5  -1   1 7788.02   75.09
  -5   1   1 7677.93   58.19
  -5   1   1 7675.83   82.29
   5   1  -1 7693.93   51.29
  -3  -1   1   73.79   10.00
   3   1  -1   75.09    7.10
  -3   1   1   70.99   10.80
  -1  -1   1    8.60    5.50
   1   1  -1    7.30    3.50
  -1   1   1    4.20    3.20
  -1   1   1    0.40    2.80
   1  -1   1   82.29    9.40
  -1   1  -1   76.19    8.60
   1   1   1   77.89    7.70
  -1   1  -1   56.99    6.60
  -3  -1  -1  282.27   14.30
   3   1   1  289.57   15.80
  -3   1  -1  276.37   17.60
  -3   1  -1  267.77   12.00
  -5  -1  -1 1687.73   36.50
   5  -1   1 1657.13   29.90
   5   1   1 1732.23   36.70
  -5   1  -1 1639.84   41.80
   7  -1   1 1253.47   30.20
  -7  -1  -1 1312.07   39.10
  -7   1  -1 1344.57   30.50
  -7   1  -1 1273.17   43.60
   7   1   1 1249.47   34.60
  -9  -1  -1  858.51   38.30
   9  -1   1  988.10   30.80
  -9   1  -1  886.71   29.90
  -9   1  -1  878.11   42.10
   9   1   1  913.51   34.30
  11  -1   1  258.47   25.00
 -11  -1  -1  247.18   30.00
  11   1   1  300.87   29.30
 -11   1  -1  255.67   32.80
 -11   1  -1  300.57   24.50
 -13  -1  -1   24.10   18.90
  13  -1   1   11.70   14.50
 -13   1  -1   18.00   19.70
  13   1   1   24.30   18.20
 -15  -1  -1   97.09   26.90
  15  -1   1   74.29   20.40
 -15   1  -1   74.09   28.40
  15   1   1   62.19   24.70
 -17  -1  -1  227.18   37.50
 -17   1  -1  191.08   38.50
  17   1   1  249.48   34.90
 -19  -1  -1   25.50   29.30
 -19   1  -1   44.90   32.20
 -21  -1  -1  122.89   42.50
 -21   1  -1  124.89   42.60
 -23  -1  -1   12.80   39.30
 -23   1  -1   12.10   41.80
 -25  -1  -1   16.70   64.59
 -25   1  -1    1.50   44.10
 -26  -2   1   65.79   49.70
 -26   2   1  102.49   43.00
 -26   2   1   76.19   49.40
 -24  -2   1   25.70   41.50
 -24   2   1   52.19   46.40
 -24   2   1   44.10   35.90
 -22  -2   1   60.89   39.60
 -22   2   1   35.30   31.30
 -22   2   1   -7.60   38.30
 -20  -2   1   17.30   34.00
 -20   2   1   50.59   38.00
 -18  -2   1  780.22   60.99
  18   2  -1  685.83   49.70
 -18   2   1  731.83   62.09
 -16  -2   1  679.03   51.99
 -16   2   1  740.13   57.09
  16   2  -1  668.83   44.50
 -14  -2   1 1022.50   53.69
 -14   2   1 1161.88   61.09
  14   2  -1 1059.59   43.40
 -12  -2   1  627.24   41.00
 -12   2   1  566.34   44.80
  12   2  -1  591.64   33.60
 -10  -2   1  149.99   24.30
  10   2  -1  134.69   18.40
 -10   2   1  130.69   25.80
 -10   2   1  177.58   21.00
  -8  -2   1  564.84   31.80
   8   2  -1  501.05   26.20
  -8   2   1  529.85   26.70
  -8   2   1  508.25   34.90
  -6  -2   1 1008.10   35.20
  -6   2   1  974.70   38.50
  -6   2   1  944.11   27.50
   6   2  -1  992.40   28.60
  -4  -2   1 2329.37   43.70
   4   2  -1 2310.17   34.90
  -4   2   1 2309.97   46.00
  -2  -2   1  506.25   23.90
  -2   2   1  542.05   14.50
  -2   2   1  519.15   19.20
   2   2  -1  525.85   17.10
   0  -2   1   15.10   11.10
   0  -2  -1   19.90    9.50
   0   2  -1   22.90    6.80
   0   2  -1   20.80    7.80
   0   2   1   16.00    7.00
   0   2   1   14.40    6.40
   2  -2   1  890.11   30.90
   2   2   1  826.72   24.00
  -2   2  -1  842.32   19.80
  -2   2  -1  870.41   26.70
  -4  -2  -1 1343.57   30.60
  -4   2  -1 1329.97   37.90
   4   2   1 1334.17   34.90
  -4   2  -1 1287.97   26.90
  -4   2  -1 1299.27   25.00
  -6  -2  -1 5497.45   67.59
  -6   2  -1 5496.45   83.59
   6   2   1 5499.15   65.89
  -6   2  -1 5394.26   52.89
  -8  -2  -1 2670.43   56.99
   8  -2   1 2617.34   42.40
   8   2   1 2794.82   53.59
  -8   2  -1 2690.93   66.69
  -8   2  -1 2656.93   42.50
 -10  -2  -1  582.74   35.10
  10  -2   1  508.85   25.20
 -10   2  -1  538.35   24.90
 -10   2  -1  554.34   40.50
  10   2   1  558.44   35.00
 -12  -2  -1  433.46   35.30
  12  -2   1  392.06   25.80
  12   2   1  365.86   35.90
 -12   2  -1  439.26   26.40
 -12   2  -1  447.66   41.60
 -14  -2  -1  258.47   36.00
  14   2   1  244.28   31.50
 -14   2  -1  199.48   35.20
 -16  -2  -1  143.59   31.20
  16   2   1  155.88   33.00
 -16   2  -1  151.78   34.70
 -18  -2  -1  262.47   42.50
 -18   2  -1  262.87   46.60
  18   2   1  209.78   38.30
 -20  -2  -1   99.09   37.10
 -20   2  -1  122.49   43.10
 -22  -2  -1   -2.30   34.70
 -22   2  -1   23.60   39.40
 -24   2  -1   52.39   46.70
 -26   2  -1   84.19   51.79
 -26   2  -1   75.19   41.20
 -25  -3   1   54.79   44.50
 -25   3   1    0.10   37.80
 -25   3   1    4.70   45.80
 -23  -3   1    1.70   38.40
 -23   3   1   28.50   33.90
 -21  -3   1   -2.60   32.70
 -21   3   1   74.99   33.40
 -21   3   1   12.80   40.10
 -19  -3   1  -12.60   27.90
 -19   3   1   31.30   24.80
  19   3  -1   15.60   30.30
 -19   3   1   38.50   36.00
 -17  -3   1  207.08   39.90
 -17   3   1  227.78   42.50
 -17   3   1  182.38   30.80
  17   3  -1  216.78   33.80
 -15  -3   1  182.28   33.40
  15   3  -1  183.38   29.10
 -15   3   1  179.98   28.40
 -15   3   1  144.79   34.10
 -13  -3   1  324.17   37.00
 -13   3   1  290.97   29.60
 -13   3   1  274.47   38.70
  13   3  -1  301.27   34.20
 -11  -3   1  422.86   36.40
 -11   3   1  408.96   31.30
 -11   3   1  447.56   42.50
  11   3  -1  437.16   32.80
  -9  -3   1  395.26   33.20
  -9   3   1  418.76   37.50
  -9   3   1  395.16   26.80
   9   3  -1  329.47   28.80
  -7  -3   1   12.20   14.90
   7   3  -1   21.00   13.10
  -7   3   1    4.70   14.80
  -5  -3   1  300.07   28.60
   5   3  -1  233.68   22.10
  -5   3   1  238.98   13.80
  -5   3   1  229.88   24.70
  -3  -3   1 2407.16   52.09
   3  -3  -1 2341.07   51.99
   3   3  -1 2383.56   40.80
  -3   3   1 2406.96   46.90
  -3   3   1 2368.06   32.00
   1  -3  -1   91.99   21.00
  -1  -3   1  132.19   24.60
  -1   3   1   80.39   12.40
   1   3  -1  140.29   14.20
   1  -3   1  517.15   38.70
  -1  -3  -1  532.65   33.80
  -1   3  -1  526.65   26.00
   1   3   1  534.25   25.90
  -1   3  -1  580.14   21.70
  -3  -3  -1 1297.07   35.00
   3  -3   1 1203.68   44.90
   3   3   1 1270.77   35.40
  -3   3  -1 1298.87   38.90
  -3   3  -1 1263.57   27.40
  -5  -3  -1  680.53   29.00
   5  -3   1  742.83   41.40
   5   3   1  738.73   31.70
  -5   3  -1  731.53   35.40
  -5   3  -1  714.13   22.20
  -7  -3  -1 1117.59   38.10
  -7   3  -1 1095.59   46.10
  -7   3  -1 1095.79   28.80
  -7   3  -1 1051.99   32.20
   7   3   1 1060.49   38.40
  -9  -3  -1   99.99   20.10
  -9   3  -1   76.09   12.40
  -9   3  -1   90.59   17.90
   9   3   1  113.99   21.50
  -9   3  -1   83.69   21.80
 -11  -3  -1  175.68   26.40
 -11   3  -1  162.98   23.00
 -11   3  -1  165.58   30.10
  11   3   1  142.69   24.70
 -13  -3  -1   38.60   20.60
 -13   3  -1   29.40   23.60
  13   3   1   -4.20   23.00
 -15  -3  -1   -6.40   21.40
 -15   3  -1    4.50   22.90
  15   3   1   16.40   27.30
 -17  -3  -1   46.70   28.00
  17   3   1   49.20   32.20
 -17   3  -1   76.29   34.50
 -19  -3  -1   41.90   31.20
 -19   3  -1   75.59   31.80
  19   3   1  -17.80   32.70
 -19   3  -1   71.49   39.30
 -21  -3  -1   11.00   32.30
 -21   3  -1   35.70   37.90
 -21   3  -1   25.80   31.30
 -23   3  -1   63.29   47.80
 -23   3  -1   27.80   36.90
 -25   3  -1  -19.70   38.50
 -25   3  -1   79.99   50.99
 -26   4   1  -22.40   39.40
 -26   4   1   48.40   51.19
 -24  -4   1   31.00   45.20
 -24   4   1   62.89   48.20
 -24   4   1   47.00   38.10
 -22  -4   1   47.80   40.10
 -22   4   1  -25.30   31.90
 -22   4   1   -5.90   40.00
 -20  -4   1   16.30   33.40
 -20   4   1  -36.90   28.10
 -20   4   1   28.70   37.90
  20   4  -1   22.10   47.90
 -18  -4   1  101.59   34.60
 -18   4   1   59.29   28.40
  18   4  -1   59.19   30.90
 -18   4   1   71.69   36.70
 -16  -4   1  127.69   33.10
  16   4  -1  168.68   31.70
 -16   4   1  131.69   29.10
 -16   4   1  131.09   36.00
 -14  -4   1   15.00   24.40
 -14   4   1    5.80   22.80
 -14   4   1   25.00   20.40
  14   4  -1    8.70   23.30
 -12  -4   1   -5.90   20.90
  12   4  -1   24.60   19.70
 -12   4   1    0.70   20.50
 -10  -4   1  238.38   30.60
  10   4  -1  276.17   31.50
 -10   4   1  177.98   31.10
  -8  -4   1  699.33   40.80
   8   4  -1  666.83   34.50
  -8   4   1  713.23   43.70
  -6  -4   1  586.44   37.40
   6   4  -1  542.85   30.50
  -6   4   1  558.04   35.10
  -6   4   1  536.95   20.60
   4  -4  -1  643.44   39.90
  -4  -4   1  664.83   39.50
   4   4  -1  709.63   30.30
  -4   4   1  686.83   23.50
  -4   4   1  644.24   33.30
  -2  -4   1  358.06   37.70
   2  -4  -1  301.07   34.60
  -2   4   1  316.47   24.40
   2   4  -1  339.27   23.20
  -2   4   1  337.27   21.80
   0  -4   1  170.78   27.70
   0  -4  -1  171.18   26.10
   0   4  -1  204.98   22.60
   0   4   1  183.78   21.30
   0   4  -1  190.48   19.10
   0   4   1  184.88   20.90
   2  -4   1   51.59   23.20
  -2  -4  -1   55.09   20.80
  -2   4  -1   48.60   16.30
  -2   4  -1   57.39   12.00
   2   4   1   43.40   14.20
  -4  -4  -1   42.80   18.10
   4  -4   1   19.50   21.30
  -4   4  -1   46.90   10.60
  -4   4  -1   33.80   15.60
   4   4   1   56.59   16.10
   6  -4   1   19.50   22.90
  -6  -4  -1   45.00   16.70
  -6   4  -1   59.39   20.00
  -6   4  -1   62.19   11.50
  -8  -4  -1   54.99   18.60
   8  -4   1   79.29   28.30
   8   4   1   79.39   21.90
  -8   4  -1   72.49   21.60
  -8   4  -1   59.89   12.10
 -10  -4  -1   20.70   18.20
 -10   4  -1   31.30   16.90
 -10   4  -1   28.40   20.50
  10   4   1   46.50   22.10
 -10   4  -1   19.90   11.80
 -12  -4  -1   73.29   23.70
 -12   4  -1  108.59   30.60
 -12   4  -1  111.69   23.70
  12   4   1   86.99   28.20
 -14  -4  -1   67.69   25.40
 -14   4  -1   64.19   28.90
 -14   4  -1   54.69   23.90
  14   4   1   90.99   32.00
 -16  -4  -1  224.78   38.20
 -16   4  -1  253.17   35.90
  16   4   1  198.48   39.90
 -16   4  -1  254.37   46.50
 -18  -4  -1  334.07   46.90
 -18   4  -1  328.47   54.89
  18   4   1  358.36   48.00
 -18   4  -1  289.47   42.10
 -20  -4  -1  189.58   54.69
  20   4   1  125.29   46.90
 -20   4  -1  159.68   45.60
 -20   4  -1  164.68   38.00
 -22   4  -1    8.30   35.70
 -22   4  -1   11.40   43.50
 -24   4  -1   67.59   46.50
 -24   4  -1   17.20   39.10
 -25   5   1  169.38   57.09
 -23   5   1  140.69   53.29
 -21  -5   1   -7.60   36.20
 -21   5   1   43.70   42.60
 -19  -5   1   94.79   37.10
  19   5  -1   61.99   35.10
 -19   5   1  170.78   48.60
 -17  -5   1  282.97   45.10
 -17   5   1  206.48   46.20
  17   5  -1  321.37   41.80
 -15  -5   1  258.87   40.60
  15   5  -1  307.47   37.50
 -15   5   1  268.57   44.70
 -13  -5   1   34.90   26.30
  13   5  -1   53.49   25.70
 -13   5   1   55.79   26.60
 -11  -5   1   12.40   22.70
  11   5  -1   -4.60   19.90
 -11   5   1  -15.20   20.40
  -9  -5   1  405.06   42.00
  -9   5   1  387.36   40.20
   9   5  -1  387.26   34.40
   7  -5  -1 1806.92   67.39
  -7  -5   1 1797.22   59.99
  -7   5   1 1805.92   60.89
  -7   5   1 1766.12   35.90
   7   5  -1 1717.53   49.60
  -5  -5   1 2444.86   63.89
   5  -5  -1 2504.85   69.49
   5   5  -1 2400.66   53.89
  -5   5   1 2499.85   43.50
  -5   5   1 2407.36   62.69
  -3  -5   1 1643.84   57.79
   3  -5  -1 1729.03   57.59
  -3   5   1 1628.34   49.30
  -3   5   1 1613.64   37.80
   3   5  -1 1596.44   43.00
  -1  -5   1  959.50   51.29
   1  -5  -1  999.90   49.00
   1   5  -1  923.31   34.20
  -1   5   1  987.30   33.80
  -1   5   1  954.40   38.10
  -1  -5  -1  172.48   29.50
   1  -5   1  157.88   30.40
  -1   5  -1  169.68   23.60
  -1   5  -1  195.28   22.20
   1   5   1  173.88   20.30
   3  -5   1  164.78   30.80
  -3  -5  -1  197.38   28.50
   3   5   1  171.58   22.10
  -3   5  -1  172.18   24.30
  -3   5  -1  183.68   18.70
  -5  -5  -1   50.09   22.30
   5  -5   1   16.00   24.90
  -5   5  -1   20.30   11.10
  -5   5  -1    3.60   16.60
   5   5   1   30.80   18.30
  -7  -5  -1 2157.28   58.69
   7  -5   1 2155.58   75.89
  -7   5  -1 2131.19   43.30
   7   5   1 2102.99   58.19
  -7   5  -1 2150.28   68.59
   9  -5   1  211.98   38.30
  -9  -5  -1  183.78   28.00
  -9   5  -1  209.28   21.00
   9   5   1  199.68   30.00
  -9   5  -1  199.78   33.60
  11  -5   1    7.50   31.10
 -11  -5  -1    1.20   20.10
 -11   5  -1   17.10   13.40
  11   5   1  -18.00   25.30
 -11   5  -1  -10.50   19.50
 -13  -5  -1  239.38   35.50
  13   5   1  305.67   40.40
 -13   5  -1  239.78   42.30
 -15  -5  -1  537.25   50.59
 -15   5  -1  511.85   57.99
 -15   5  -1  601.34   46.60
  15   5   1  530.95   56.89
 -17  -5  -1  675.43   57.89
 -17   5  -1  603.24   51.69
  17   5   1  683.53   63.19
 -17   5  -1  631.64   66.99
 -19   5  -1  376.26   59.59
  19   5   1  374.66   49.40
 -19   5  -1  462.75   49.20
 -21   5  -1   50.99   43.40
 -21   5  -1  150.18   41.10
 -23   5  -1   24.40   47.00
 -23   5  -1   15.00   37.80
 -24   6   1   85.89   49.40
 -22   6   1    4.60   42.00
 -20  -6   1    1.30   35.70
  20   6  -1   -6.30   35.50
 -20   6   1   38.60   41.00
 -18  -6   1   67.99   38.40
 -18   6   1   58.49   38.70
  18   6  -1  100.89   37.40
 -16  -6   1  156.08   38.90
  16   6  -1  142.89   36.20
 -16   6   1  137.09   42.90
 -14  -6   1    8.20   28.10
 -14   6   1   25.20   29.50
  14   6  -1   59.39   30.30
 -12  -6   1    2.90   27.10
 -12   6   1  -18.70   22.70
  12   6  -1   20.30   25.30
 -10  -6   1   23.80   28.00
  10  -6  -1  -28.10   31.30
  10   6  -1   27.60   22.00
 -10   6   1   28.70   23.90
  -8  -6   1  135.09   32.70
   8  -6  -1  136.09   36.80
  -8   6   1  137.89   16.70
   8   6  -1  122.29   23.50
  -8   6   1  156.08   30.90
  -6  -6   1 1340.47   61.49
   6  -6  -1 1398.06   63.59
   6   6  -1 1439.26   49.50
  -6   6   1 1359.26   54.79
  -6   6   1 1368.66   38.10
   4  -6  -1 1373.46   62.39
  -4  -6   1 1387.36   63.19
  -4   6   1 1366.56   52.79
   4   6  -1 1283.17   45.90
  -4   6   1 1365.76   40.00
   2  -6  -1  819.22   55.09
  -2  -6   1  789.82   55.39
  -2   6   1  857.71   35.40
  -2   6   1  825.12   42.10
   2   6  -1  860.21   38.70
   0  -6   1   50.99   32.50
   0  -6  -1   55.59   30.80
   0   6   1   63.99   18.80
   0   6  -1   56.19   17.60
   2  -6   1   92.89   35.00
  -2  -6  -1   79.49   31.30
   2   6   1  109.49   21.80
  -2   6  -1  102.59   18.70
  -2   6  -1  103.89   24.00
  -4  -6  -1  132.19   31.30
   4  -6   1   81.49   32.30
  -4   6  -1  143.89   18.80
   4   6   1   69.89   21.60
  -4   6  -1  100.79   23.80
   6  -6   1  214.28   38.70
  -6  -6  -1  202.88   31.70
  -6   6  -1  221.78   31.00
  -6   6  -1  220.68   23.70
   6   6   1  184.28   27.10
   8  -6   1  621.64   57.69
  -8  -6  -1  610.54   46.10
  -8   6  -1  615.74   29.60
  -8   6  -1  652.43   47.00
   8   6   1  653.63   44.70
 -10  -6  -1   -2.20   23.70
  10  -6   1  -13.90   33.10
  10   6   1    6.50   26.00
 -10   6  -1   -7.30   22.40
 -10   6  -1   12.80   12.70
  12  -6   1   41.90   41.30
 -12  -6  -1   89.99   28.60
 -12   6  -1   66.89   32.00
  12   6   1  110.79   33.60
 -12   6  -1   72.19   19.80
  14  -6   1  280.37   56.19
 -14  -6  -1  295.77   42.50
  14   6   1  348.27   45.20
 -14   6  -1  317.87   49.60
 -16  -6  -1  250.47   44.70
  16  -6   1  301.87   59.99
 -16   6  -1  369.46   55.19
  16   6   1  274.57   45.60
  18  -6   1  273.17   59.29
 -18   6  -1  199.98   48.80
  18   6   1  164.68   45.50
  20  -6   1  135.69   54.89
  20   6   1   74.29   43.70
 -20   6  -1   79.19   44.20
  22  -6   1  126.19   55.19
 -22   6  -1   25.60   41.10
  24  -6   1  108.59   52.29
 -24   6  -1  -13.20   42.80
  23  -7  -1  126.79   56.09
 -23   7   1   26.50   45.80
  21  -7  -1   84.49   53.29
  21   7  -1  -68.49   39.10
 -21   7   1   70.49   42.70
  19  -7  -1   44.00   50.19
 -19  -7   1  -12.80   38.00
  19   7  -1  -47.70   35.30
 -19   7   1   27.70   37.20
  17  -7  -1   38.30   45.30
 -17  -7   1  -41.50   33.10
  17   7  -1  -50.59   34.10
 -17   7   1   -0.90   30.50
 -15  -7   1   -3.60   33.90
  15  -7  -1  -49.10   43.60
 -15   7   1   33.80   33.10
  15   7  -1   -1.90   31.80
 -13  -7   1   43.30   32.20
  13  -7  -1    0.80   42.40
  13   7  -1    8.90   29.80
 -13   7   1   -9.60   27.70
  11  -7  -1   39.50   42.50
 -11  -7   1   -1.50   32.90
 -11   7   1   15.80   28.80
  11   7  -1   16.80   26.70
   9  -7  -1    3.60   34.60
  -9  -7   1   37.30   35.00
   9   7  -1    6.20   23.20
  -9   7   1   -7.40   22.70
  -9   7   1    0.50   14.10
   7  -7  -1    1.90   31.00
  -7  -7   1   15.80   34.40
  -7   7   1    6.60   15.60
   7   7  -1   28.30   22.00
  -7   7   1   33.30   22.00
   5  -7  -1   29.70   32.70
  -5  -7   1   45.40   37.10
  -5   7   1   51.29   17.50
   5   7  -1   37.90   20.00
  -5   7   1   47.50   23.20
   3  -7  -1  168.18   39.40
  -3  -7   1   97.69   38.70
  -3   7   1  137.69   21.80
  -3   7   1  180.38   28.60
   3   7  -1  154.68   24.60
  -1  -7   1   18.70   36.60
   1  -7  -1   22.50   34.30
  -1   7   1   22.20   20.70
   1   7  -1   -0.70   16.90
  -1   7   1  -25.20   16.50
  -1  -7  -1   86.39   36.60
   1  -7   1   85.89   37.60
   1   7   1  105.99   23.00
  -1   7  -1   72.39   23.70
  -1   7  -1   85.39   20.50
  -3  -7  -1   52.39   34.50
   3  -7   1   20.10   37.00
   3   7   1   49.40   21.80
  -3   7  -1   47.50   23.60
  -3   7  -1   16.10   17.20
   5  -7   1  332.77   47.10
  -5  -7  -1  392.96   51.29
  -5   7  -1  299.07   39.50
  -5   7  -1  362.96   29.80
   5   7   1  324.87   37.90
   7  -7   1   17.60   35.40
  -7  -7  -1   -3.60   31.10
  -7   7  -1   16.20   22.80
  -7   7  -1   22.70   15.60
   7   7   1   26.40   24.40
  -9  -7  -1   43.40   31.20
   9  -7   1    3.40   37.40
  -9   7  -1   37.80   16.30
  -9   7  -1   32.90   27.00
   9   7   1   23.10   27.30
  11  -7   1    9.30   38.90
 -11  -7  -1    0.60   29.20
 -11   7  -1   11.80   28.30
 -11   7  -1   36.60   16.60
  11   7   1   40.80   31.70
  13  -7   1   27.30   47.40
 -13  -7  -1   28.60   32.10
  13   7   1   71.19   36.40
 -13   7  -1   76.09   37.20
  15  -7   1    7.60   49.30
  15   7   1  -20.90   35.10
 -15   7  -1   30.10   37.00
  17  -7   1   12.10   47.80
 -17   7  -1   30.30   41.90
  17   7   1    2.30   37.70
  19  -7   1   97.89   51.09
 -19   7  -1   27.30   40.90
  19   7   1  -19.70   40.40
  21  -7   1   86.29   54.49
  21   7   1 -105.29   40.70
 -21   7  -1   29.70   46.70
  23  -7   1  116.69   54.69
 -23   7  -1   60.59   54.59
  22  -8  -1  144.79   50.59
  22   8  -1  -36.40   46.80
 -22   8   1   37.70   49.40
  20  -8  -1   39.80   48.90
  20   8  -1  -22.90   43.00
 -20   8   1   61.69   43.90
  18  -8  -1  137.19   52.79
  18   8  -1   39.90   42.20
 -18   8   1  109.69   47.40
  16  -8  -1   98.99   51.99
 -16  -8   1   66.39   39.20
  16   8  -1   32.20   38.00
 -16   8   1  108.39   42.50
  14  -8  -1  179.08   55.99
 -14  -8   1  161.38   44.30
 -14   8   1  153.98   42.80
  14   8  -1  171.38   40.60
 -12  -8   1   44.70   39.20
  12  -8  -1   38.80   47.30
 -12   8   1   48.80   32.70
  12   8  -1   25.30   32.70
  10  -8  -1    2.90   40.40
 -10  -8   1  -64.09   38.00
 -10   8   1  -21.60   18.50
  10   8  -1   28.40   28.40
 -10   8   1   -9.90   25.90
  -8  -8   1  179.08   47.20
   8  -8  -1  140.89   45.70
  -8   8   1  146.39   34.00
  -8   8   1  137.89   24.30
   8   8  -1  175.88   30.80
  -6  -8   1  202.88   48.50
   6  -8  -1  165.08   46.10
  -6   8   1  204.98   35.40
  -6   8   1  195.18   26.50
   6   8  -1  181.08   29.40
   4  -8  -1  205.68   48.10
  -4  -8   1  280.87   51.79
   4   8  -1  201.38   29.90
  -4   8   1  227.58   35.50
  -4   8   1  259.87   29.70
  -2  -8   1  124.79   45.70
   2  -8  -1  112.59   45.30
  -2   8   1   86.19   23.60
  -2   8   1   91.19   28.10
   2   8  -1   90.69   23.00
   0  -8   1  -26.10   41.90
   0  -8  -1   -9.90   40.80
   0   8   1  -17.10   19.60
   0   8  -1   -8.50   18.80
   2  -8   1   -3.40   39.90
  -2  -8  -1    8.10   42.40
   2   8   1    3.30   21.20
  -2   8  -1   15.80   20.00
  -2   8  -1  -20.60   23.00
   4  -8   1  706.03   74.39
  -4  -8  -1  613.54   68.99
  -4   8  -1  651.13   40.20
   4   8   1  663.03   46.10
  -4   8  -1  590.94   50.49
  -6  -8  -1  384.16   51.69
   6  -8   1  409.36   59.69
   6   8   1  514.65   45.50
  -6   8  -1  437.86   46.90
  -6   8  -1  479.65   36.70
   8  -8   1  344.97   56.79
  -8  -8  -1  518.95   62.19
  -8   8  -1  474.15   36.20
  -8   8  -1  423.26   49.99
   8   8   1  513.25   50.49
 -10  -8  -1   45.90   37.20
  10  -8   1    4.20   43.70
 -10   8  -1   39.40   30.90
 -10   8  -1   43.40   20.10
  10   8   1   78.89   33.00
 -12  -8  -1  -18.70   34.80
  12  -8   1   85.59   50.89
  12   8   1   13.90   34.60
 -12   8  -1   15.40   30.70
  14  -8   1    8.10   43.70
  14   8   1   24.00   37.10
 -14   8  -1    6.70   31.90
  16  -8   1  116.69   53.79
 -16   8  -1   79.09   42.80
  16   8   1   81.29   42.40
  18  -8   1  126.09   55.59
  18   8   1   -6.90   42.90
 -18   8  -1   94.09   45.80
  20  -8   1  123.89   57.79
  20   8   1  -24.10   46.50
 -20   8  -1  159.68   53.39
  22  -8   1  144.99   54.69
 -22   8  -1   15.00   49.10
  22   8   1  -83.09   47.50
  21  -9  -1  148.69   57.39
 -21   9   1   26.60   48.50
  21   9  -1  -94.29   46.10
  19  -9  -1  130.99   61.39
  19   9  -1  -32.80   44.10
 -19   9   1   35.00   43.40
  17  -9  -1  192.78   58.19
 -17   9   1  136.39   47.10
  17   9  -1  115.09   45.40
 -15  -9   1  153.58   49.70
  15  -9  -1  188.68   56.29
 -15   9   1  193.68   45.70
  15   9  -1  119.79   42.90
  13  -9  -1   98.99   49.70
 -13  -9   1   40.90   43.50
 -13   9   1   85.99   35.20
  13   9  -1   52.19   36.10
  11  -9  -1   17.30   46.80
 -11  -9   1   58.69   47.50
 -11   9   1   23.80   30.30
  11   9  -1    4.80   32.00
   9  -9  -1   14.50   49.90
  -9  -9   1   98.39   50.99
   9   9  -1   25.70   30.00
  -9   9   1   65.89   32.60
  -9   9   1   24.20   22.60
   7  -9  -1  134.59   53.99
  -7  -9   1  152.98   54.19
  -7   9   1   64.59   26.40
  -7   9   1  104.29   34.00
   7   9  -1   94.69   28.50
  -5  -9   1  235.98   58.99
   5  -9  -1  247.38   58.89
  -5   9   1  270.37   41.40
   5   9  -1  187.88   30.30
  -5   9   1  268.27   32.40
  -3  -9   1  224.68   59.29
   3  -9  -1  238.78   58.29
   3   9  -1  234.98   33.20
  -3   9   1  252.97   40.40
  -3   9   1  249.18   32.90
  -1  -9   1   59.09   55.09
   1  -9  -1   -9.00   50.49
  -1   9   1   74.39   26.50
   1   9  -1   60.59   25.10
  -1  -9  -1   -4.70   49.30
   1  -9   1  -68.99   49.60
  -1   9  -1   32.80   23.90
   1   9   1   21.60   25.00
  -3  -9  -1  275.57   58.59
   3  -9   1  298.17   59.59
  -3   9  -1  236.68   39.40
   3   9   1  218.28   34.40
  -3   9  -1  242.18   31.60
   5  -9   1  313.27   63.49
  -5  -9  -1  308.97   54.69
  -5   9  -1  437.16   40.70
   5   9   1  431.16   47.70
  -5   9  -1  487.25   54.19
   7  -9   1  243.38   60.79
  -7  -9  -1  338.37   55.39
  -7   9  -1  243.48   39.60
   7   9   1  249.08   36.90
  -7   9  -1  331.17   36.90
  -9  -9  -1  179.78   49.60
   9  -9   1  148.29   57.49
  -9   9  -1  128.79   25.60
  -9   9  -1  110.59   34.80
   9   9   1  162.68   37.00
  11  -9   1   -6.80   47.20
 -11   9  -1    6.80   31.00
  11   9   1   33.90   34.50
  13  -9   1   31.80   48.10
 -13   9  -1   19.60   31.80
  13   9   1  -47.20   34.70
  15  -9   1  122.69   53.09
  15   9   1   34.20   43.10
 -15   9  -1   73.49   40.30
  17  -9   1  117.79   57.49
  17   9   1  101.39   48.70
 -17   9  -1  168.18   49.60
  19  -9   1  126.19   58.59
  19   9   1  -32.30   48.10
 -19   9  -1  101.59   46.80
  21  -9   1  162.28   62.59
  21   9   1  -38.10   50.79
 -21   9  -1   18.20   47.40
  20 -10  -1  129.79   58.09
 -20  10   1   16.80   44.20
  20  10  -1  -99.69   47.30
  18 -10  -1  137.89   59.49
  18  10  -1  -82.19   45.30
 -18  10   1   33.40   43.60
  16 -10  -1   26.40   53.09
 -16  10   1   86.39   45.40
  16  10  -1  -41.00   39.90
  14 -10  -1  148.49   55.89
  14  10  -1   69.59   40.90
 -14  10   1   91.99   40.40
  12 -10  -1  -46.40   47.50
 -12 -10   1  -55.39   44.40
  12  10  -1  -29.70   33.40
 -12  10   1   -7.20   29.80
 -10 -10   1  -29.70   48.70
  10 -10  -1   18.80   51.89
 -10  10   1    8.20   29.80
  10  10  -1  -49.90   30.30
  -8 -10   1  -38.30   51.39
   8 -10  -1   -4.70   56.59
  -8  10   1  -16.40   24.00
  -8  10   1  -10.40   28.90
   8  10  -1  -29.10   29.00
   6 -10  -1  -45.80   56.89
  -6 -10   1   61.29   56.99
  -6  10   1  -26.10   25.40
  -6  10   1    4.50   32.70
   6  10  -1   -3.00   28.20
  -4 -10   1   71.89   60.99
   4 -10  -1   26.20   61.89
  -4  10   1   11.00   28.30
  -4  10   1   79.59   38.10
   4  10  -1   56.09   29.00
  -2 -10   1  -36.00   59.39
   2 -10  -1    8.20   58.59
   2  10  -1   25.40   27.30
  -2  10   1   18.20   29.70
   0 -10  -1  -25.90   58.39
   0 -10   1   34.70   60.89
   0  10  -1   -3.10   27.10
   0  10   1  -10.40   28.20
  -2 -10  -1   -2.40   57.89
   2 -10   1  -29.80   58.69
  -2  10  -1  -42.50   23.70
   2  10   1   55.79   32.90
  -4 -10  -1   56.89   58.99
   4 -10   1   -5.10   59.29
  -4  10  -1   43.90   34.70
  -4  10  -1   11.60   26.00
   4  10   1   27.90   30.70
   6 -10   1  -24.10   59.89
  -6 -10  -1   35.30   53.19
  -6  10  -1    6.00   31.60
   6  10   1  -14.50   32.40
  -6  10  -1   14.20   26.30
   8 -10   1   20.90   57.39
  -8 -10  -1  -40.80   48.00
  -8  10  -1    8.50   30.90
   8  10   1   -2.90   32.20
  -8  10  -1  -21.00   22.30
  10 -10   1  -39.60   51.49
  10  10   1  -24.10   33.70
 -10  10  -1   -7.60   29.30
  12 -10   1   11.40   51.89
 -12  10  -1   64.59   35.60
  12  10   1  -24.80   35.40
  14 -10   1  162.48   62.59
 -14  10  -1   30.90   39.10
  14  10   1   32.80   41.60
  16 -10   1   34.80   56.99
  16  10   1   63.49   47.40
 -16  10  -1   30.90   40.60
  18 -10   1  107.19   59.99
  18  10   1  -87.39   45.50
 -18  10  -1   42.40   46.80
  19 -11  -1  162.98   65.49
 -19  11   1   66.59   47.60
  19  11  -1  -59.69   47.70
  17 -11  -1  133.29   61.99
 -17  11   1   49.10   42.60
  17  11  -1  -73.19   44.90
  15 -11  -1  118.09   62.89
 -15  11   1   11.60   38.20
  15  11  -1  -25.30   41.70
  13 -11  -1   66.39   59.29
 -13  11   1   16.30   35.40
  13  11  -1  -85.39   36.60
  11 -11  -1   -8.80   53.29
 -11  11   1  -24.60   35.20
  11  11  -1    4.90   35.10
   9 -11  -1   75.99   58.29
  -9 -11   1  -88.09   52.49
  -9  11   1  -27.80   31.60
   9  11  -1  -55.59   31.50
   7 -11  -1   94.69   59.99
  -7 -11   1  -21.30   56.89
  -7  11   1   -9.40   27.60
   7  11  -1  -60.89   30.80
  -7  11   1   -4.10   35.90
  -5 -11   1   20.60   61.69
   5 -11  -1   49.50   61.69
  -5  11   1   21.00   37.60
   5  11  -1   30.10   32.50
  -5  11   1   36.80   31.60
   3 -11  -1  -85.39   59.49
  -3 -11   1   50.99   62.19
  -3  11   1   26.70   34.40
   3  11  -1  -36.90   29.20
   1 -11  -1  118.69   66.09
  -1 -11   1  118.09   64.99
  -1  11   1   71.29   36.50
   1  11  -1   85.09   34.10
  -1 -11  -1    4.10   60.49
   1 -11   1   96.19   67.79
   1  11   1   14.20   32.80
  -1  11  -1   10.60   31.60
  -3 -11  -1   15.20   58.49
   3 -11   1   34.90   62.49
  -3  11  -1  -41.80   28.00
   3  11   1   40.40   34.30
   5 -11   1   71.79   60.09
  -5 -11  -1    8.70   54.49
   5  11   1  -24.90   31.40
  -5  11  -1   -5.00   35.20
  -5  11  -1   22.40   28.10
   7 -11   1   86.99   62.79
  -7  11  -1   57.19   27.50
   7  11   1    8.80   37.20
  -7  11  -1  -14.10   33.60
   9 -11   1   72.09   59.09
   9  11   1   -3.80   36.30
  -9  11  -1   21.00   35.10
  11 -11   1   20.90   56.19
  11  11   1  -46.40   37.60
 -11  11  -1   24.60   33.60
  13 -11   1   53.99   60.29
  13  11   1  -29.50   42.80
 -13  11  -1   35.80   41.70
  15 -11   1  118.39   65.19
  15  11   1  -25.60   46.20
 -15  11  -1  -16.40   41.00
  17 -11   1  171.38   68.59
  17  11   1 -108.79   47.90
 -17  11  -1   59.59   48.50
  16 -12  -1  203.28   68.79
 -16  12   1   77.79   46.60
  14 -12  -1   53.09   63.59
  14  12  -1  -55.99   44.20
 -14  12   1   88.19   44.80
  12 -12  -1   79.09   63.59
  12  12  -1  -68.29   39.10
 -12  12   1   -5.80   38.70
  10 -12  -1   80.79   66.19
  10  12  -1  -41.00   38.00
 -10  12   1    6.30   40.60
  -8 -12   1  -67.49   59.69
   8 -12  -1  101.19   65.39
   8  12  -1  -57.59   32.40
  -8  12   1   52.89   43.80
  -6 -12   1  -10.10   61.59
   6 -12  -1  101.39   61.89
   6  12  -1   38.20   37.20
  -6  12   1   30.30   42.60
  -6  12   1   -5.80   33.10
   4 -12  -1  158.08   66.29
  -4 -12   1   33.60   65.29
  -4  12   1  106.99   39.10
   4  12  -1   37.30   36.10
  -2 -12   1  -61.99   62.09
   2 -12  -1  -52.69   61.59
   2  12  -1  -23.70   33.70
  -2  12   1  -12.40   35.90
   0 -12   1   11.70   64.29
   0 -12  -1  -29.40   60.29
   0  12   1  -70.29   31.40
   0  12  -1    9.60   34.70
  -2 -12  -1  -56.49   60.09
   2 -12   1  -24.30   65.09
   2  12   1  -33.70   35.10
  -2  12  -1  -34.30   30.60
  -4 -12  -1   55.19   72.79
   4 -12   1  152.98   67.39
   4  12   1   98.59   40.70
  -4  12  -1   88.19   34.00
   6 -12   1  183.88   67.19
  -6  12  -1   94.29   34.50
  -6  12  -1   11.80   40.80
   6  12   1   -4.80   38.20
   8 -12   1  146.69   69.49
  -8  12  -1   81.09   42.10
   8  12   1   15.30   40.10
  10 -12   1   93.49   68.59
  10  12   1   51.59   43.40
 -10  12  -1   71.19   43.30
  12 -12   1   57.99   67.69
  12  12   1  -51.99   44.10
 -12  12  -1   33.40   41.20
  14 -12   1  158.78   70.89
 -14  12  -1   38.50   43.00
 -16  12  -1   51.89   48.40
  16  12   1 -118.29   50.39
  13 -13  -1   40.20   66.79
 -13  13   1   63.99   49.99
  13  13  -1    0.10   49.00
  11 -13  -1  102.29   68.89
  11  13  -1  -81.79   42.90
 -11  13   1  -17.80   44.80
   9 -13  -1   98.09   67.39
  -9  13   1  -45.50   45.10
   9  13  -1  -25.40   38.70
  -7 -13   1 -200.08   74.49
   7 -13  -1    6.60   63.09
  -7  13   1  -38.30   45.20
   7  13  -1  -50.69   36.20
   5 -13  -1  155.98   72.29
  -5 -13   1 -100.59   67.59
   5  13  -1   60.69   40.60
  -5  13   1   35.20   37.70
  -3 -13   1 -152.88   65.19
   3 -13  -1  -41.70   65.69
   3  13  -1  -39.60   36.60
  -3  13   1  -74.49   37.20
  -1 -13   1  -50.39   67.99
   1 -13  -1  -29.00   64.99
   1  13  -1  -53.49   35.60
  -1  13   1  -74.09   36.80
   1 -13   1  -12.20   67.39
  -1 -13  -1  -67.19   64.39
  -1  13  -1   25.70   36.20
   1  13   1   28.50   39.50
   3 -13   1   19.70   71.49
  -3  13  -1  -25.40   32.10
   3  13   1  -79.99   37.00
   5 -13   1  107.29   71.99
   5  13   1   -6.00   39.90
  -5  13  -1   68.79   36.70
   7 -13   1  170.18   73.59
   7  13   1  -46.00   39.50
  -7  13  -1  -21.50   46.70
   9 -13   1   99.29   71.19
   9  13   1  -17.80   42.20
  -9  13  -1    8.10   48.50
  11 -13   1  134.59   72.69
  11  13   1  -65.69   43.50
 -11  13  -1   14.00   47.40
  13 -13   1   19.70   67.59
 -13  13  -1   27.30   47.30
  13  13   1  -35.00   48.80
  10 -14  -1  153.68   73.49
 -10  14   1  -37.40   50.89
  10  14  -1  -75.29   42.50
   8 -14  -1   44.50   69.69
   8  14  -1  -68.79   41.10
  -8  14   1 -104.19   47.20
   6 -14  -1   53.49   71.29
   6  14  -1  -81.39   38.70
   4 -14  -1   46.60   74.79
  -4  14   1  -64.69   36.30
   4  14  -1  -77.19   38.20
  -2 -14   1 -121.19   70.89
   2 -14  -1    5.00   73.59
  -2  14   1 -110.59   39.40
   2  14  -1  -63.49   38.40
   0 -14   1 -168.68   69.49
   0  14  -1  -95.19   33.40
   0  14   1 -104.69   38.60
   2 -14   1  -23.90   71.99
  -2  14  -1  -39.40   36.90
   2  14   1  -13.50   41.10
   4 -14   1  -33.60   72.29
   4  14   1  -46.80   44.90
  -4  14  -1  -13.50   36.80
   6 -14   1  -27.70   69.99
   6  14   1 -126.39   40.60
   8 -14   1    9.40   69.39
   8  14   1 -104.29   43.80
  10  14   1  -47.70   46.40
 -10  14  -1  -32.40   50.49
   5 -15  -1 -117.19   73.19
   5  15  -1  -88.79   44.30
   3 -15  -1  -77.69  104.39
   3  15  -1  -42.50   43.00
  -3  15   1  -98.39   38.50
  -1 -15   1 -122.59   79.49
  -1  15   1 -118.69   43.40
   1  15  -1 -105.39   39.80
   1 -15   1  -93.99   78.39
  -1  15  -1  -77.99   36.60
   3 -15   1  -88.69   77.29
   3  15   1 -100.39   46.00
  -3  15  -1  -31.10   39.70
 -26   0   2   51.59   49.50
 -24   0   2  156.68   50.59
 -22   0   2  567.74   67.19
 -20   0   2  982.80   70.89
 -18   0   2  799.82   61.29
 -16   0   2  567.54   51.39
 -14   0   2   75.49   24.90
 -12   0   2  344.87   35.40
 -10   0   2  302.67   30.80
  -8   0   2  602.34   33.10
  -6   0   2  134.39   17.80
  -4   0   2 4268.07   51.79
  -2   0   2 1336.37   22.00
   2   0  -2 1260.67   16.20
   0   0   2 7437.56   48.60
   0   0  -2 7302.77   46.80
   2   0   2 8765.92   63.39
  -2   0  -2 8721.33   62.89
  -4   0  -2 2007.20   36.90
  -4   0  -2 1989.20   38.30
   4   0   2 1976.30   38.00
  -6   0  -2  763.52   31.00
  -6   0  -2  838.62   29.50
   6   0   2  785.42   28.90
  -8   0  -2  117.79   17.30
  -8   0  -2   97.19   18.10
   8   0   2   99.19   16.00
  10   0   2  273.97   27.50
 -10   0  -2  246.28   29.40
 -10   0  -2  242.78   26.10
  12   0   2  400.06   32.30
 -12   0  -2  431.86   37.30
 -14   0  -2   76.79   25.60
  14   0   2  102.69   24.40
  16   0   2   53.19   26.20
 -16   0  -2   59.29   28.30
 -18   0  -2   44.30   29.20
 -20   0  -2  498.05   59.69
 -22   0  -2  178.68   47.20
 -24   0  -2  197.18   52.59
 -27  -1   2   15.10   51.19
 -27   1   2   37.00   50.99
 -27   1   2   72.79   38.20
 -25  -1   2  -27.20   41.00
 -25   1   2   -2.30   43.20
 -23  -1   2  397.76   61.29
 -23   1   2  420.16   61.39
 -21  -1   2  250.37   47.80
 -21   1   2  216.98   48.00
 -19  -1   2  593.44   59.09
 -19   1   2  575.74   58.89
 -17  -1   2  583.74   51.99
  17   1  -2  520.55   37.30
 -17   1   2  538.35   52.79
 -15  -1   2  151.48   31.30
 -15   1   2  165.98   33.80
  15   1  -2  108.99   20.20
 -13  -1   2   15.40   17.90
 -13   1   2    8.40   19.90
  13   1  -2  -27.20   13.10
 -11  -1   2  121.89   23.50
 -11   1   2  115.69   25.20
  11   1  -2  112.49   15.30
  -9  -1   2   85.19   18.30
   9   1  -2  120.59   13.40
  -9   1   2  113.79   22.50
  -7  -1   2   17.70   12.10
  -7   1   2   -6.80   10.20
  -7   1   2   22.10   14.50
   7   1  -2   26.90    9.10
  -5  -1   2  113.39   15.90
  -5   1   2  133.79   12.70
   5   1  -2  113.09   11.90
  -5   1   2  100.89   16.50
  -3  -1   2 2487.05   38.20
   3   1  -2 2516.05   27.80
  -3   1   2 2508.25   38.10
  -1  -1   2 1531.65   27.20
   1  -1  -2 1496.25   23.60
   1   1  -2 1495.45   22.30
  -1   1   2 1515.05   23.30
   1  -1   2 4017.60   45.20
  -1  -1  -2 3862.81   45.00
  -1   1  -2 3768.02   37.20
  -1   1  -2 3949.10   43.60
   1   1   2 3878.41   43.20
  -3  -1  -2 9903.71   80.89
   3  -1   2 9999.00   84.29
  -3   1  -2 9973.90   81.89
   3   1   2 9858.11   77.99
  -3   1  -2 9556.94   66.59
  -5  -1  -2 2868.61   46.30
   5  -1   2 2931.21   44.20
   5   1   2 2905.11   49.70
  -5   1  -2 2958.10   55.19
  -5   1  -2 2882.21   43.20
  -7  -1  -2  756.52   31.50
   7  -1   2  798.52   28.70
   7   1   2  793.12   32.50
  -7   1  -2  766.52   36.00
  -7   1  -2  747.63   27.20
   9  -1   2   41.80   13.30
  -9  -1  -2   65.79   17.30
  -9   1  -2   49.90   13.30
   9   1   2   71.09   17.60
  -9   1  -2   48.50   18.40
 -11  -1  -2  171.88   24.80
  11  -1   2  144.39   19.00
  11   1   2  147.99   23.10
 -11   1  -2  164.18   27.50
 -11   1  -2  147.09   19.00
  13  -1   2   63.39   18.20
 -13  -1  -2   62.29   22.00
 -13   1  -2   69.79   18.50
  13   1   2  103.19   23.50
 -13   1  -2   62.29   23.40
 -15  -1  -2   -7.40   20.60
  15  -1   2   -7.20   18.70
  15   1   2    0.00   24.00
 -15   1  -2   22.80   22.50
 -17  -1  -2   -1.90   22.60
 -17   1  -2   17.90   27.10
  17   1   2   10.80   28.60
 -19  -1  -2   22.00   29.20
 -19   1  -2   94.19   36.50
 -21  -1  -2  110.49   40.90
 -21   1  -2  202.88   47.30
 -23   1  -2  176.88   49.99
 -25   1  -2   79.99   47.70
 -26  -2   2   10.10   46.00
 -26   2   2   30.70   38.40
 -26   2   2   37.10   48.10
 -24  -2   2    5.50   37.60
 -24   2   2    9.80   30.90
 -24   2   2   17.10   44.10
 -22  -2   2   51.29   38.70
 -22   2   2   30.10   39.50
 -22   2   2   96.49   34.30
 -20  -2   2   12.00   31.30
 -20   2   2   14.90   33.70
 -20   2   2   -2.50   24.50
 -18  -2   2   39.30   30.00
 -18   2   2   38.20   29.70
 -18   2   2   29.40   23.20
  18   2  -2   14.00   26.20
 -16  -2   2   91.09   28.80
 -16   2   2  108.19   24.60
 -16   2   2  139.69   33.50
  16   2  -2  141.99   24.50
 -14  -2   2  166.48   30.50
 -14   2   2  144.89   24.00
 -14   2   2  156.08   31.90
  14   2  -2  136.29   22.40
 -12  -2   2  216.88   29.70
  12   2  -2  213.48   21.70
 -12   2   2  195.38   33.00
 -12   2   2  194.28   24.10
 -10  -2   2  825.92   41.60
  10   2  -2  790.72   30.40
 -10   2   2  812.82   33.70
 -10   2   2  805.12   44.80
  -8  -2   2 1324.27   45.20
   8   2  -2 1383.06   32.80
  -8   2   2 1339.97   35.20
  -8   2   2 1369.76   49.50
  -6  -2   2  810.12   34.30
   6   2  -2  781.12   26.20
  -6   2   2  798.62   35.60
  -4  -2   2 6930.91   73.69
  -4   2   2 7153.38   76.09
   4   2  -2 7080.39   56.79
  -2  -2   2   95.39   17.00
  -2   2   2   68.19   10.10
  -2   2   2   89.39   10.00
   2   2  -2   74.99    9.80
   0  -2   2   64.09   16.00
   0   2   2   64.89   10.70
   0   2  -2   49.60    8.60
   0   2  -2   65.59   11.20
   2  -2   2  711.83   34.80
   2   2   2  699.83   27.30
  -2   2  -2  727.03   27.40
  -2   2  -2  732.93   21.20
   4  -2   2  146.89   23.50
  -4   2  -2  155.28   15.40
  -4   2  -2  168.08   20.10
   4   2   2  161.98   18.60
  -6   2  -2  327.17   27.40
   6   2   2  313.87   27.10
  -6   2  -2  346.97   19.90
  -8  -2  -2   88.79   16.70
   8  -2   2   81.49   14.10
  -8   2  -2   92.89   14.10
   8   2   2  104.49   20.00
  -8   2  -2   85.49   21.20
 -10  -2  -2 1562.24   50.39
  10  -2   2 1607.14   42.30
 -10   2  -2 1562.24   59.89
  10   2   2 1528.75   49.70
 -10   2  -2 1563.94   41.50
  12  -2   2  158.58   20.30
 -12  -2  -2  152.88   25.90
  12   2   2  200.88   27.80
 -12   2  -2  186.88   32.40
 -12   2  -2  134.99   18.90
  14  -2   2  325.17   32.20
 -14  -2  -2  337.17   38.30
 -14   2  -2  316.67   30.60
  14   2   2  297.27   35.80
 -14   2  -2  261.97   38.20
 -16  -2  -2   67.49   27.00
 -16   2  -2   71.09   29.40
  16   2   2  119.89   33.30
 -18  -2  -2   17.90   25.60
 -18   2  -2   -2.80   28.70
  18   2   2   13.70   31.30
 -20  -2  -2   -0.10   29.80
 -20   2  -2   21.70   34.30
 -22   2  -2   64.19   40.80
 -24   2  -2    9.50   45.30
 -27  -3   2  -13.90   47.30
 -27   3   2   81.29   53.69
 -27   3   2   -3.50   38.20
 -25  -3   2  -23.70   40.20
 -25   3   2  113.89   53.09
 -25   3   2  -31.10   35.40
 -23  -3   2  -28.60   38.30
 -23   3   2  -12.70   39.70
 -23   3   2    5.80   32.20
 -21  -3   2   18.70   34.30
 -21   3   2   67.89   33.00
 -21   3   2   27.80   36.50
 -19  -3   2   69.69   36.60
 -19   3   2   53.49   35.30
 -19   3   2   79.69   28.60
  19   3  -2   56.39   35.10
 -17  -3   2   -0.40   23.80
 -17   3   2   19.90   28.60
 -17   3   2   -3.60   21.40
  17   3  -2    6.30   24.20
 -15  -3   2    5.00   22.90
 -15   3   2    1.80   22.60
 -15   3   2   18.10   20.00
  15   3  -2    1.10   20.90
 -13  -3   2  518.55   42.40
  13   3  -2  524.55   35.40
 -13   3   2  502.15   34.80
 -13   3   2  554.64   48.20
 -11  -3   2  525.65   38.50
 -11   3   2  433.06   41.40
  11   3  -2  469.25   31.80
 -11   3   2  437.66   30.90
  -9  -3   2 3481.35   73.59
   9   3  -2 3434.96   55.79
  -9   3   2 3528.45   82.59
  -7  -3   2 2837.12   62.29
  -7   3   2 2837.52   66.49
   7   3  -2 2780.72   48.00
  -5  -3   2 3962.10   65.79
   5   3  -2 4058.19   52.59
  -5   3   2 4030.70   67.29
  -3  -3   2   79.39   23.90
  -3   3   2   53.99   12.70
  -3   3   2   86.79   12.30
   3   3  -2   68.39   12.30
   1  -3  -2 3613.64   51.39
  -1  -3   2 3610.14   64.39
  -1   3   2 3569.54   45.90
   1   3  -2 3597.94   47.10
  -1   3   2 3586.24   46.60
   1  -3   2 1462.05   50.59
  -1   3  -2 1437.56   39.90
   1   3   2 1580.44   37.40
  -1   3  -2 1520.45   32.20
   3  -3   2 1981.90   54.69
  -3   3  -2 1930.31   48.30
   3   3   2 1939.61   44.00
  -3   3  -2 1963.20   36.60
   5  -3   2  215.98   29.50
  -5   3  -2  168.18   17.50
  -5   3  -2  176.98   16.40
   5   3   2  217.68   22.90
  -5   3  -2  169.38   23.50
   7  -3   2   56.19   24.40
  -7   3  -2   60.59   12.70
  -7   3  -2   60.89   19.00
  -7   3  -2   21.40   13.40
   7   3   2   45.70   18.50
  -9  -3  -2 1585.54   48.20
  -9   3  -2 1623.84   60.89
  -9   3  -2 1598.64   40.40
   9   3   2 1578.04   52.59
 -11  -3  -2 1524.65   52.89
  11  -3   2 1518.85   43.30
  11   3   2 1531.25   55.79
 -11   3  -2 1614.74   65.99
 -11   3  -2 1582.44   43.50
  13  -3   2 1216.08   43.60
 -13  -3  -2 1185.68   53.19
 -13   3  -2 1189.28   42.20
 -13   3  -2 1199.48   64.09
  13   3   2 1220.18   57.49
 -15  -3  -2  418.36   43.70
  15   3   2  499.45   51.19
 -15   3  -2  469.85   52.59
 -17  -3  -2   18.60   23.80
 -17   3  -2   23.20   32.10
  17   3   2   -2.00   32.00
 -19  -3  -2   43.20   31.60
  19   3   2   39.80   34.70
 -19   3  -2   61.79   39.10
 -21   3  -2   35.10   43.60
 -23   3  -2   70.69   47.90
 -23   3  -2   33.80   37.50
 -25   3  -2   52.59   41.80
 -25   3  -2   64.59   49.30
 -26  -4   2  -28.00   46.90
 -26   4   2   95.29   51.99
 -26   4   2  -69.99   39.00
 -24  -4   2   26.30   41.30
 -24   4   2   22.00   42.30
 -24   4   2    0.40   35.00
 -22  -4   2   54.99   39.30
 -22   4   2   73.59   44.50
 -22   4   2   36.90   33.40
 -20  -4   2  159.48   43.50
 -20   4   2  214.98   37.50
 -20   4   2  210.78   49.70
 -18  -4   2   56.19   32.30
 -18   4   2   49.00   33.80
 -18   4   2    6.30   24.80
  18   4  -2   73.69   30.20
 -16  -4   2   73.79   28.80
 -16   4   2   58.49   31.10
  16   4  -2   80.69   26.70
 -16   4   2   49.60   24.00
 -14   4   2  231.18   38.10
  14   4  -2  292.27   31.60
 -12  -4   2  308.37   40.00
  12   4  -2  311.77   32.90
 -12   4   2  242.98   36.20
 -10  -4   2 1517.55   57.59
  10   4  -2 1531.05   46.40
 -10   4   2 1511.25   61.99
  -8  -4   2 1543.35   55.29
  -8   4   2 1611.74   58.29
   8   4  -2 1613.14   44.80
  -6  -4   2 2385.16   60.69
   6   4  -2 2504.35   49.90
  -6   4   2 2389.46   60.79
  -6   4   2 2378.56   34.10
  -4  -4   2   42.70   22.60
   4  -4  -2    5.40   19.10
  -4   4   2   22.20   10.40
   4   4  -2    6.90   11.40
  -4   4   2   16.80   13.30
   2  -4  -2 1184.78   40.90
  -2  -4   2 1203.48   48.70
   2   4  -2 1179.78   33.70
  -2   4   2 1183.48   35.20
  -2   4   2 1216.68   32.30
   0  -4  -2 1565.84   44.40
   0  -4   2 1584.74   54.19
   0   4  -2 1523.35   36.40
   0   4  -2 1511.15   43.00
   0   4   2 1517.25   38.50
   0   4   2 1549.24   36.00
   2  -4   2 1566.14   55.89
  -2   4  -2 1488.85   35.60
   2   4   2 1457.15   40.60
  -2   4  -2 1568.94   47.20
   4  -4   2  778.62   46.20
  -4   4  -2  831.62   39.80
   4   4   2  797.32   36.40
  -4   4  -2  798.62   27.90
   6  -4   2   -5.90   21.80
   6   4   2    7.20   17.00
  -6   4  -2   13.60   10.40
  -6   4  -2   13.60   15.60
   8  -4   2  187.38   35.00
   8   4   2  211.88   28.50
  -8   4  -2  171.88   29.60
  -8   4  -2  200.88   21.30
  -8   4  -2  193.48   21.60
 -10  -4  -2 1044.70   45.00
  10  -4   2 1053.19   63.79
 -10   4  -2 1097.99   56.19
 -10   4  -2 1086.69   37.40
  10   4   2 1120.09   51.39
 -10   4  -2 1069.99   41.30
  12  -4   2 1068.99   41.70
 -12  -4  -2 1094.39   50.79
 -12   4  -2 1151.78   62.49
 -12   4  -2 1159.08   48.20
 -12   4  -2 1130.59   41.10
  12   4   2 1118.19   57.19
 -14  -4  -2  244.28   36.10
  14  -4   2  228.78   32.20
 -14   4  -2  325.57   35.80
 -14   4  -2  363.06   48.20
  14   4   2  328.87   41.30
 -16  -4  -2   53.09   28.40
  16   4   2   90.69   38.50
 -16   4  -2   21.10   31.90
 -16   4  -2   38.00   28.50
  18   4   2  -49.20   32.40
 -18   4  -2   -1.10   29.10
 -18   4  -2   15.90   34.80
  20   4   2  -40.50   39.80
 -20   4  -2   33.60   34.70
 -20   4  -2   12.10   38.10
 -22   4  -2    0.00   41.60
 -22   4  -2    9.00   37.70
 -24   4  -2   40.30   47.20
 -24   4  -2   29.70   41.70
 -25  -5   2  -21.20   61.19
 -25   5   2   38.80   47.60
 -23  -5   2  -15.70   40.60
 -23   5   2   16.60   42.90
 -21  -5   2   13.00   34.90
 -21   5   2   19.30   36.50
 -19  -5   2   16.10   33.50
  19   5  -2   16.00   31.00
 -19   5   2   50.09   36.80
 -17  -5   2   57.09   33.30
  17   5  -2   48.90   30.00
 -17   5   2   37.40   33.20
 -15  -5   2   54.99   29.80
 -15   5   2   79.99   32.30
  15   5  -2   98.79   29.10
 -13  -5   2   -3.30   26.00
  13   5  -2   -0.20   21.80
 -13   5   2   -3.80   23.20
 -11  -5   2    5.50   23.60
 -11   5   2    6.90   21.40
  11   5  -2    2.30   19.60
  -9  -5   2  140.59   30.00
  -9   5   2  100.49   25.70
   9   5  -2  123.59   22.80
  -7  -5   2   65.19   26.80
  -7   5   2   14.50   12.40
   7   5  -2   53.69   18.90
  -7   5   2   72.79   21.70
  -5  -5   2  144.79   29.90
   5  -5  -2  106.09   28.20
  -5   5   2  127.69   22.90
  -5   5   2  111.19   16.00
   5   5  -2   92.49   18.90
  -3  -5   2   63.89   28.40
   3  -5  -2   48.80   22.70
  -3   5   2   68.99   14.90
   3   5  -2   51.59   15.90
  -3   5   2   86.29   17.90
   1  -5  -2   82.79   25.50
  -1  -5   2   32.60   27.60
  -1   5   2   58.89   15.50
  -1   5   2   56.79   17.00
   1   5  -2   44.70   14.40
  -1  -5  -2  238.58   29.40
   1  -5   2  196.38   33.10
   1   5   2  274.47   28.60
  -1   5  -2  261.67   29.80
  -1   5  -2  212.28   23.40
   3  -5   2  264.07   36.40
  -3   5  -2  365.46   24.90
   3   5   2  351.26   33.10
  -3   5  -2  313.67   32.40
   5  -5   2   64.59   30.30
  -5   5  -2   67.59   14.30
  -5   5  -2   50.79   20.40
   7  -5   2   18.30   26.70
  -7   5  -2  -10.60   16.80
  -7   5  -2    1.80   10.70
   7   5   2   37.90   22.50
   9  -5   2   68.09   34.40
  -9  -5  -2   67.89   22.20
  -9   5  -2  100.09   27.80
  -9   5  -2   58.99   15.10
   9   5   2   69.79   26.30
  11  -5   2   82.99   37.90
 -11   5  -2   75.29   17.50
 -11   5  -2  143.89   32.90
  11   5   2  102.99   32.10
 -13  -5  -2   31.00   23.60
  13  -5   2   27.60   39.40
  13  -5   2   12.50   17.10
 -13   5  -2    1.20   20.00
 -13   5  -2    0.80   24.90
  13   5   2  -15.40   29.70
 -13   5  -2    0.80   21.30
 -15  -5  -2    6.60   25.60
  15  -5   2   -7.20   43.60
  15   5   2   33.50   36.20
 -15   5  -2  -41.70   23.30
 -15   5  -2   25.30   29.30
  17  -5   2   -9.70   44.00
 -17   5  -2   11.50   33.00
 -17   5  -2  -32.60   27.00
  17   5   2   23.30   39.80
  19  -5   2   51.89   46.30
  19   5   2  -65.49   38.40
 -19   5  -2  -12.50   31.80
 -19   5  -2    3.10   36.20
  21  -5   2   85.29   51.69
 -21   5  -2   13.20   40.50
 -21   5  -2  -13.00   35.50
  23  -5   2  109.19   50.99
 -23   5  -2   16.20   39.90
 -23   5  -2   -5.90   39.10
 -24   6   2   56.79   50.39
 -22  -6   2   42.70   43.00
 -22   6   2   47.60   41.10
 -20  -6   2   27.80   39.70
 -20   6   2   20.90   39.20
  20   6  -2  -63.29   32.80
 -18  -6   2   21.70   34.90
 -18   6   2   -6.80   32.60
  18   6  -2  -44.40   32.00
 -16  -6   2   23.30   33.10
 -16   6   2  -23.00   31.40
  16   6  -2    2.80   29.80
 -14  -6   2  134.49   37.00
 -14   6   2   85.99   34.40
  14   6  -2  172.58   32.90
 -12  -6   2  254.27   39.90
  12   6  -2  253.47   33.30
 -12   6   2  182.28   36.80
 -10  -6   2  669.43   54.49
  10  -6  -2  552.84   58.79
  10   6  -2  636.24   42.30
 -10   6   2  649.54   49.90
   8  -6  -2  406.66   50.89
  -8  -6   2  431.16   49.20
  -8   6   2  429.36   25.00
  -8   6   2  408.26   40.70
   8   6  -2  480.55   37.90
  -6  -6   2  368.26   49.40
   6  -6  -2  296.47   39.10
  -6   6   2  319.37   35.40
  -6   6   2  376.36   27.00
   6   6  -2  317.57   32.80
  -4  -6   2  114.09   35.50
   4  -6  -2   78.69   29.50
  -4   6   2   97.69   23.10
   4   6  -2   95.69   20.90
  -4   6   2   96.99   18.00
   2  -6  -2   10.90   29.10
  -2  -6   2  -15.40   31.50
  -2   6   2    2.10   17.70
  -2   6   2   34.30   17.00
   2   6  -2   20.80   16.70
   0  -6   2  380.86   44.30
   0  -6  -2  416.36   47.00
   0   6   2  379.86   33.30
   0   6  -2  368.96   31.10
  -2  -6  -2 1056.69   53.19
   2  -6   2 1051.09   64.29
  -2   6  -2  986.00   38.20
   2   6   2  980.10   43.70
  -2   6  -2  883.01   47.50
  -4  -6  -2   33.00   26.60
   4  -6   2   39.70   33.30
  -4   6  -2   28.60   20.10
   4   6   2   67.59   23.40
  -4   6  -2   62.19   15.60
   6  -6   2   57.09   33.30
   6   6   2   43.90   23.50
  -6   6  -2   66.99   15.40
  -6   6  -2   39.10   22.00
   8  -6   2   39.70   34.10
   8   6   2   46.90   27.50
  -8   6  -2   34.30   23.60
  -8   6  -2   53.49   14.70
  10  -6   2  198.08   45.30
 -10   6  -2  260.97   26.60
  10   6   2  173.88   35.30
 -10   6  -2  177.48   35.00
  12  -6   2  208.78   51.39
 -12   6  -2  310.37   31.70
  12   6   2  187.68   39.40
 -12   6  -2  192.58   40.10
  14  -6   2   96.09   52.49
  14   6   2  132.79   41.90
 -14   6  -2  102.79   41.00
  16  -6   2   91.69   49.40
 -16   6  -2   39.70   37.20
  16   6   2   53.69   41.60
  18  -6   2   56.19   47.70
  18   6   2  -65.69   40.50
 -18   6  -2   54.79   42.60
  20  -6   2  112.69   51.69
  20   6   2  -35.70   41.70
 -20   6  -2   38.50   42.40
  22  -6   2  187.18   55.09
 -22   6  -2   39.80   46.90
 -23   7   2   47.30   44.50
 -21  -7   2   30.60   42.00
  21   7  -2  -48.00   38.40
 -21   7   2   92.49   45.60
 -19  -7   2   -9.70   37.90
  19   7  -2  -64.79   35.50
 -19   7   2   29.60   38.00
 -17  -7   2   -8.60   34.20
 -17   7   2   42.50   34.90
  17   7  -2  -22.60   34.80
  15  -7  -2   11.20   46.60
 -15  -7   2   30.60   35.40
 -15   7   2   47.80   33.10
  15   7  -2   44.30   33.20
 -13  -7   2  467.45   59.59
  13  -7  -2  299.37   54.59
 -13   7   2  278.07   44.50
  13   7  -2  434.36   50.09
  11  -7  -2  826.62   71.79
 -11  -7   2  921.71   66.99
 -11   7   2  835.62   60.09
  11   7  -2  790.72   51.79
   9  -7  -2 1354.96   76.09
  -9  -7   2 1291.97   71.59
  -9   7   2 1293.67   39.70
   9   7  -2 1366.66   55.89
  -9   7   2 1294.67   64.59
  -7  -7   2  586.04   62.39
   7  -7  -2  657.83   58.09
  -7   7   2  601.44   33.20
  -7   7   2  582.54   45.10
   7   7  -2  592.84   40.90
  -5  -7   2  339.37   48.00
   5  -7  -2  439.96   53.99
   5   7  -2  461.15   36.90
  -5   7   2  456.15   32.50
  -5   7   2  474.85   40.70
  -3  -7   2   27.00   37.40
   3  -7  -2    4.90   33.00
  -3   7   2   -5.80   19.20
  -3   7   2   24.00   18.00
   3   7  -2   -4.60   16.60
  -1  -7   2  358.96   48.90
   1  -7  -2  403.76   52.39
  -1   7   2  425.86   37.20
  -1   7   2  450.15   35.40
   1   7  -2  345.87   33.00
   1  -7   2  473.25   59.69
  -1  -7  -2  438.56   54.69
  -1   7  -2  495.55   40.70
   1   7   2  489.85   38.80
  -1   7  -2  492.25   35.00
  -3  -7  -2  805.42   57.59
   3  -7   2  788.62   68.89
  -3   7  -2  784.82   50.09
  -3   7  -2  832.72   38.60
   3   7   2  772.12   44.00
  -5  -7  -2   51.19   32.90
   5  -7   2    1.60   36.90
  -5   7  -2   18.20   15.30
   5   7   2   -7.30   22.30
  -5   7  -2    6.30   21.40
   7  -7   2  -19.30   34.70
  -7   7  -2    2.90   21.60
  -7   7  -2   12.80   14.70
   7   7   2   16.00   27.90
  -9  -7  -2  233.08   36.50
   9  -7   2  216.48   50.79
  -9   7  -2  244.48   40.20
  -9   7  -2  292.77   28.40
   9   7   2  260.17   38.90
  11  -7   2  433.16   59.89
 -11  -7  -2  572.94   53.09
  11   7   2  615.74   58.59
 -11   7  -2  580.74   36.40
 -11   7  -2  569.04   57.19
  13  -7   2  264.77   58.39
 -13   7  -2  303.07   50.49
  13   7   2  362.96   50.29
  15  -7   2  182.38   54.99
  15   7   2  226.58   46.50
 -15   7  -2  164.58   45.50
  17  -7   2   72.99   51.69
 -17   7  -2   47.10   40.70
  17   7   2   -3.40   42.20
  19  -7   2   96.29   53.79
  19   7   2  -16.90   43.70
 -19   7  -2    0.40   42.10
  21  -7   2  191.98   59.19
 -21   7  -2   56.29   47.00
  21   7   2   54.99   50.29
  22  -8  -2   77.29   54.49
 -22   8   2   18.40   44.30
  20  -8  -2  117.39   52.39
 -20   8   2   19.00   37.30
  20   8  -2  -87.59   38.90
 -18  -8   2  -10.10   40.80
  18  -8  -2  103.39   52.69
  18   8  -2  -58.99   35.90
 -18   8   2   22.90   38.50
 -16  -8   2  -25.80   38.20
  16  -8  -2   53.19   47.80
  16   8  -2  -49.99   35.10
 -16   8   2   -8.40   35.00
 -14  -8   2   44.90   39.00
  14  -8  -2   24.10   48.70
  14   8  -2   67.69   36.70
 -14   8   2   76.99   37.50
 -12  -8   2  181.08   48.80
  12  -8  -2  162.48   53.69
  12   8  -2  162.28   36.20
 -12   8   2  151.18   39.50
  10  -8  -2  337.37   55.29
 -10  -8   2  519.15   69.59
 -10   8   2  391.66   35.30
 -10   8   2  456.35   52.09
  10   8  -2  424.26   46.10
  -8  -8   2  585.84   69.29
   8  -8  -2  521.35   66.69
  -8   8   2  570.14   51.59
  -8   8   2  545.75   38.50
   8   8  -2  572.64   45.10
  -6  -8   2  590.64   69.79
   6  -8  -2  558.24   67.09
   6   8  -2  633.64   43.50
  -6   8   2  671.13   50.79
  -6   8   2  610.14   40.10
  -4  -8   2   19.30   45.00
   4  -8  -2   65.49   43.20
   4   8  -2   50.09   21.70
  -4   8   2   65.49   23.40
  -4   8   2   54.39   27.80
  -2  -8   2   41.60   43.60
   2  -8  -2   15.40   40.50
   2   8  -2   19.20   19.40
  -2   8   2   52.69   22.60
  -2   8   2   51.39   25.90
   0  -8   2   37.10   44.00
   0  -8  -2   51.69   42.00
   0   8   2   30.00   22.60
   0   8  -2  -18.80   18.50
   2  -8   2   80.79   44.80
  -2  -8  -2   39.90   43.00
  -2   8  -2   56.69   21.70
   2   8   2   78.69   26.70
  -2   8  -2  110.99   30.30
  -4  -8  -2   71.39   42.20
   4  -8   2   43.10   47.30
  -4   8  -2   88.09   29.10
   4   8   2   46.80   26.90
  -4   8  -2   64.09   21.00
   6  -8   2    7.30   42.90
  -6  -8  -2   36.40   37.70
  -6   8  -2   29.20   26.10
  -6   8  -2   -1.40   18.60
   6   8   2   27.00   28.40
  -8  -8  -2   92.09   38.90
   8  -8   2   99.49   47.90
  -8   8  -2   75.79   21.10
  -8   8  -2   89.19   31.10
   8   8   2   68.69   32.10
  10  -8   2  206.28   57.79
  10   8   2  262.27   43.00
 -10   8  -2  212.28   42.30
 -10   8  -2  176.18   25.10
  12  -8   2  152.58   55.29
 -12   8  -2  222.58   45.50
  12   8   2  232.98   44.10
  14  -8   2   84.99   51.79
  14   8   2  112.19   41.80
 -14   8  -2  109.59   40.30
  16  -8   2   17.10   47.40
  16   8   2  -30.20   40.00
 -16   8  -2   35.40   39.90
  18  -8   2   66.19   53.09
  18   8   2 -113.89   40.40
 -18   8  -2    7.20   39.50
  20  -8   2  108.29   57.39
  20   8   2  -93.29   45.50
 -20   8  -2   45.90   47.20
  21  -9  -2  116.49   53.49
  21   9  -2  -28.90   46.30
 -21   9   2   32.30   47.60
  19  -9  -2  153.88   58.99
 -19   9   2   20.50   42.00
  19   9  -2   14.20   42.80
 -17  -9   2  -13.40   45.30
  17  -9  -2  158.78   57.19
  17   9  -2   42.30   40.90
 -17   9   2   41.90   41.00
 -15  -9   2  -74.09   39.20
  15  -9  -2  102.19   53.09
 -15   9   2   66.59   37.20
  15   9  -2   -9.40   36.80
 -13  -9   2  -77.39   41.10
  13  -9  -2   17.70   48.90
 -13   9   2   17.70   31.50
  13   9  -2  -38.10   31.20
  11  -9  -2   -1.20   48.50
 -11  -9   2   32.10   46.50
 -11   9   2   20.70   30.60
  11   9  -2    5.90   29.70
  -9  -9   2   56.99   51.69
   9  -9  -2   20.20   49.80
   9   9  -2   27.00   28.00
  -9   9   2   39.00   23.50
  -9   9   2   72.09   32.90
  -7  -9   2    7.90   49.60
   7  -9  -2    8.00   48.80
  -7   9   2  -29.90   23.70
  -7   9   2  -23.90   27.80
   7   9  -2    3.30   23.30
   5  -9  -2  143.99   54.79
  -5  -9   2  164.78   56.99
   5   9  -2  192.18   31.40
  -5   9   2  217.78   32.80
  -5   9   2  230.78   39.70
  -3  -9   2   -5.80   53.39
   3  -9  -2  -50.89   49.60
  -3   9   2   14.70   29.50
  -3   9   2   21.60   26.30
   3   9  -2   33.70   23.60
  -1  -9   2  266.77   61.29
   1  -9  -2  342.57   60.69
   1   9  -2  396.46   42.40
  -1   9   2  399.66   44.40
  -1  -9  -2  122.49   52.19
   1  -9   2  174.28   57.29
  -1   9  -2  163.18   28.20
   1   9   2  202.08   33.80
  -3  -9  -2  159.38   53.39
   3  -9   2   43.80   52.89
  -3   9  -2   79.99   24.30
  -3   9  -2   80.49   33.30
   3   9   2  103.59   30.50
   5  -9   2   50.39   55.89
  -5  -9  -2   62.09   49.00
  -5   9  -2   28.90   23.20
  -5   9  -2   12.40   28.60
   5   9   2   42.70   29.50
  -7  -9  -2    2.00   44.90
   7  -9   2   55.99   55.59
  -7   9  -2   63.39   32.20
  -7   9  -2   24.30   23.80
   7   9   2   54.99   32.40
   9  -9   2   17.80   52.29
  -9   9  -2    9.30   21.70
   9   9   2   56.29   35.20
  -9   9  -2   52.69   33.90
  11  -9   2    1.90   48.40
  11   9   2   77.39   39.00
 -11   9  -2   33.90   31.70
  13  -9   2   41.80   52.19
 -13   9  -2   19.40   33.50
  13   9   2  -35.40   37.40
  15  -9   2   41.60   53.39
 -15   9  -2   50.09   38.20
  15   9   2   -3.20   43.50
  17  -9   2  104.79   57.99
 -17   9  -2   41.50   40.20
  17   9   2  -10.40   44.90
  19  -9   2  245.18   68.19
  19   9   2    0.40   50.09
 -19   9  -2  -17.90   44.00
  20 -10  -2  187.78   62.69
  20  10  -2   -8.80   49.50
 -20  10   2   89.39   51.29
  18 -10  -2  296.57   66.49
 -18  10   2  104.89   46.40
  18  10  -2   61.49   46.50
  16 -10  -2  101.59   54.89
 -16  10   2   94.29   42.40
  16  10  -2   25.70   41.50
 -14 -10   2  -83.19   45.90
  14 -10  -2   79.29   51.79
  14  10  -2  -61.79   34.40
 -14  10   2   37.50   35.40
  12 -10  -2   43.80   50.89
 -12 -10   2  -79.59   45.70
 -12  10   2   53.59   32.20
  12  10  -2  -15.90   32.70
  10 -10  -2   85.09   54.59
 -10 -10   2   89.79   56.59
  10  10  -2  -11.70   30.60
 -10  10   2   66.09   36.80
  -8 -10   2  -24.10   54.39
   8 -10  -2  -62.19   53.09
  -8  10   2  -32.50   24.90
  -8  10   2  -30.20   30.20
   8  10  -2   -1.80   30.50
  -6 -10   2   60.09   58.89
   6 -10  -2  -25.80   59.19
   6  10  -2   50.79   29.90
  -6  10   2   44.10   36.20
  -6  10   2    6.40   28.20
  -4 -10   2  173.88   64.29
   4 -10  -2  125.99   62.39
  -4  10   2  154.18   35.10
  -4  10   2  181.28   42.10
   4  10  -2  143.99   33.20
   2 -10  -2  215.98   63.49
  -2 -10   2  269.57   66.89
  -2  10   2  183.58   36.50
   2  10  -2  161.08   33.80
   0 -10  -2  311.57   65.79
   0 -10   2  440.96   73.29
   0  10   2  597.34   53.59
   0  10  -2  599.04   50.29
   2 -10   2  414.06   74.79
  -2 -10  -2  458.05   68.89
  -2  10  -2  563.14   48.60
   2  10   2  558.74   57.29
   4 -10   2  183.88   65.39
  -4 -10  -2  204.08   62.09
   4  10   2  178.58   38.20
  -4  10  -2  172.58   31.80
  -4  10  -2  202.58   41.10
   6 -10   2  -29.80   61.19
  -6  10  -2   58.19   26.10
  -6  10  -2   76.79   36.40
   6  10   2   37.40   34.20
   8 -10   2  -26.70   55.09
   8  10   2    3.30   33.20
  -8  10  -2    1.60   22.40
  -8  10  -2   29.00   31.80
  10 -10   2    7.80   52.89
  10  10   2  -46.00   34.80
 -10  10  -2  -27.40   27.90
  12 -10   2   99.69   55.09
  12  10   2   49.60   41.20
 -12  10  -2   50.19   37.60
  14 -10   2   91.69   57.99
  14  10   2  -55.39   40.60
 -14  10  -2   20.00   39.10
  16 -10   2  126.19   62.59
  16  10   2  -17.00   46.90
 -16  10  -2    8.00   42.70
  18 -10   2  192.98   67.19
 -18  10  -2   80.79   49.99
  18  10   2  -24.60   52.09
  19 -11  -2  233.98   66.19
 -19  11   2   61.29   49.70
  19  11  -2   10.30   51.49
  17 -11  -2  136.19   61.19
  17  11  -2  -46.20   44.90
 -17  11   2  104.79   47.80
  15 -11  -2   76.69   59.99
  15  11  -2  -48.70   39.50
 -15  11   2   14.10   39.10
  13 -11  -2   46.20   56.29
 -13 -11   2  -85.59   52.49
  13  11  -2  -71.09   36.60
 -13  11   2  -24.40   35.60
  11 -11  -2  153.78   59.89
 -11 -11   2 -110.59   51.39
  11  11  -2  -43.90   33.40
 -11  11   2   42.20   38.20
  -9 -11   2  -81.79   52.29
   9 -11  -2  115.49   58.29
  -9  11   2   40.50   37.90
   9  11  -2  -18.70   32.90
  -7 -11   2  -34.50   55.39
   7 -11  -2   -0.80   55.29
   7  11  -2  -57.99   29.20
  -7  11   2   38.90   40.20
  -7  11   2    0.10   28.20
  -5 -11   2  -25.80   62.79
   5 -11  -2   43.00   61.79
  -5  11   2   -3.60   37.60
   5  11  -2  -42.20   28.00
  -5  11   2  -33.30   31.20
   3 -11  -2  119.09   62.39
  -3 -11   2    1.00   61.69
  -3  11   2  -39.40   33.50
   3  11  -2   13.80   31.50
  -1 -11   2  221.28   69.59
   1 -11  -2  334.97   73.19
   1  11  -2  218.68   39.80
  -1  11   2  154.48   38.60
   1 -11   2  292.77   73.29
  -1 -11  -2  239.88   65.29
  -1  11  -2  292.17   40.00
   1  11   2  285.27   44.10
  -3 -11  -2  150.78   59.49
   3 -11   2  223.98   68.29
  -3  11  -2  224.28   37.00
   3  11   2  174.58   41.20
   5 -11   2  216.28   65.89
  -5  11  -2   78.89   38.80
   5  11   2   39.60   36.90
  -5  11  -2  120.69   31.70
   7 -11   2   90.49   62.39
  -7  11  -2  -31.90   33.90
  -7  11  -2    0.80   26.90
   7  11   2  -19.60   34.80
   9 -11   2   66.49   61.79
   9  11   2  -21.40   35.70
  -9  11  -2   17.40   36.50
  11 -11   2   68.19   63.39
  11  11   2  -62.99   36.20
 -11  11  -2   31.50   38.70
  13 -11   2   36.50   63.59
 -13  11  -2   44.50   41.40
  13  11   2  -80.19   42.10
  15 -11   2   20.80   61.59
  15  11   2 -117.19   43.80
 -15  11  -2   27.70   46.50
  17 -11   2   76.79   63.79
 -17  11  -2   21.30   49.99
  17  11   2 -102.79   48.60
  16 -12  -2  113.29   63.09
  16  12  -2  -86.09   43.50
 -16  12   2   42.70   43.50
  14 -12  -2  104.99   63.89
  14  12  -2  -87.49   42.20
 -14  12   2   41.20   44.10
  12 -12  -2   22.20   59.89
  12  12  -2 -102.49   38.70
 -12  12   2   -9.70   39.60
 -10 -12   2 -114.99   58.69
  10 -12  -2   60.99   61.89
 -10  12   2  -12.90   39.00
  -8 -12   2 -112.79   61.29
   8 -12  -2   16.80   60.19
  -8  12   2    6.90   42.50
   8  12  -2  -30.40   32.30
   6 -12  -2  118.49   62.99
  -6 -12   2  -77.59   59.39
  -6  12   2  -56.39   32.00
   6  12  -2  -59.49   32.10
  -6  12   2  -41.60   40.20
   4 -12  -2   66.09   61.99
  -4 -12   2  -78.19   62.69
   4  12  -2  -16.60   33.30
  -4  12   2  -60.09   33.60
  -2 -12   2 -121.99   60.89
   2 -12  -2   -6.90   62.39
   2  12  -2  -48.80   32.30
  -2  12   2  -70.99   35.00
   0 -12   2   -1.30   63.29
   0 -12  -2   11.40   58.79
   0  12   2  -23.80   34.70
   0  12  -2    3.70   30.60
   2 -12   2  -11.60   63.99
   2  12   2  -18.20   36.10
  -2  12  -2  -26.70   29.20
   4 -12   2   78.29   64.79
  -4  12  -2    0.40   30.90
   4  12   2  -16.00   38.70
   6 -12   2   26.40   61.49
   6  12   2   -0.60   38.90
  -6  12  -2  -16.70   27.70
  -6  12  -2  -20.40   38.70
   8 -12   2  -10.80   64.19
  -8  12  -2  -67.49   34.90
   8  12   2  -53.09   38.90
  10 -12   2   75.99   69.19
 -10  12  -2   -7.80   38.70
  10  12   2  -22.90   42.50
  12 -12   2   56.49   67.49
 -12  12  -2   11.40   41.40
  12  12   2  -90.09   46.00
  14 -12   2   49.40   66.29
 -14  12  -2   30.10   45.80
  14  12   2 -127.29   47.80
 -15  13   2  -13.10   47.30
  13 -13  -2   90.09   66.29
 -13  13   2    1.10   47.50
  13  13  -2  -57.99   47.30
  11 -13  -2  118.39   67.19
 -11  13   2  100.39   49.99
  11  13  -2  -27.70   42.40
  -9 -13   2 -139.89   63.89
   9 -13  -2  132.89   69.39
   9  13  -2    6.00   39.20
  -9  13   2  -17.40   44.70
  -7 -13   2  -19.50   69.29
   7 -13  -2   90.09   65.69
  -7  13   2  -72.59   44.60
   7  13  -2  -59.59   35.80
  -5 -13   2 -122.19   67.09
   5 -13  -2   89.49   65.59
  -5  13   2  -83.99   35.30
   5  13  -2  -59.19   35.20
   3 -13  -2    0.60   68.99
  -3 -13   2  -63.69   67.19
   3  13  -2  -30.10   35.70
  -3  13   2  -64.29   37.40
  -1 -13   2  -19.40   70.79
   1 -13  -2   60.79   70.19
   1  13  -2   45.00   36.70
  -1  13   2  -22.90   38.90
   1 -13   2   -3.60   67.39
   1  13   2  -55.09   37.90
  -1  13  -2  -17.70   32.50
   3 -13   2  -17.10   69.59
  -3  13  -2  -37.60   29.90
   3  13   2  -85.69   36.60
   5 -13   2   68.79   73.49
  -5  13  -2  -22.20   32.80
   5  13   2  -57.99   38.60
   7 -13   2   62.59   68.79
   7  13   2  -96.79   37.90
  -7  13  -2  -81.19   40.80
   9 -13   2  116.99   73.39
  -9  13  -2   -5.10   44.80
   9  13   2  -85.29   42.40
  11 -13   2   39.20   70.89
  11  13   2  -59.49   46.00
 -11  13  -2   -8.90   45.30
 -13  13  -2   34.30   52.69
  10 -14  -2  102.99   69.49
 -10  14   2    6.70   51.19
  10  14  -2  -27.50   45.60
   8 -14  -2   78.09   70.09
   8  14  -2  -26.90   43.70
  -8  14   2  -56.29   50.79
  -6 -14   2 -179.18   69.79
   6 -14  -2   57.69   69.19
   6  14  -2  -28.70   40.90
  -4 -14   2 -179.58   73.49
   4 -14  -2   70.29   73.49
  -4  14   2 -100.09   39.40
   4  14  -2  -29.80   41.60
  -2 -14   2 -127.59   71.29
   2  14  -2   -2.90   37.90
  -2  14   2 -114.79   40.50
   0 -14   2 -109.19   71.29
   0  14   2  -32.70   41.80
   0  14  -2  -84.79   33.30
   2 -14   2   16.90   72.79
  -2  14  -2   32.50   38.10
   2  14   2  -21.50   43.60
   4 -14   2    5.40   74.39
  -4  14  -2  -37.10   34.90
   4  14   2 -118.49   39.90
   6 -14   2   64.79   76.69
   6  14   2  -77.89   42.40
   8 -14   2   86.79   71.79
   8  14   2  -63.29   47.10
   5  15  -2  -58.19   45.40
  -3 -15   2 -215.88   80.99
  -3  15   2 -111.99   44.60
   3  15  -2  -51.29   36.80
  -1 -15   2 -133.39   80.59
   1  15  -2 -113.59   36.60
   1 -15   2 -124.49   79.79
  -1  15  -2  -11.30   38.60
   1  15   2 -140.09   45.50
  -3  15  -2  -61.69   38.10
   3  15   2  -48.40   47.60
 -28   0   3  -20.80   37.20
 -28   0   3   23.10   50.49
 -26   0   3  -20.90   43.60
 -24   0   3  -30.90   38.90
 -22   0   3  -15.50   32.80
 -20   0   3    0.70   31.10
 -18   0   3   -4.60   26.60
 -16   0   3   20.30   23.70
 -14   0   3   20.80   19.20
 -12   0   3   -7.00   17.00
 -10   0   3   -5.70   13.60
  -8   0   3   -4.40   12.60
  -6   0   3   10.80   11.30
  -4   0   3    4.50    9.10
   4   0  -3    2.60    4.70
   2   0  -3   -5.40    4.50
  -2   0   3   -0.90    6.80
   0   0  -3    1.50    5.80
   0   0   3    3.60    6.10
  -2   0  -3    9.70    7.50
   2   0   3    3.40    7.80
  -4   0  -3   -0.40    8.50
   4   0   3  -14.00    9.40
  -4   0  -3   -1.60    8.80
   6   0   3    5.80   11.50
  -6   0  -3   -0.30   10.50
  -6   0  -3   12.50   11.10
  -8   0  -3    5.70   13.00
   8   0   3    5.00   12.90
  -8   0  -3   10.80   12.10
  10   0   3   18.20   14.60
 -10   0  -3   18.20   14.60
 -10   0  -3   11.50   13.40
  12   0   3   -6.70   16.30
 -12   0  -3   -6.60   16.20
  14   0   3    0.40   20.70
 -14   0  -3   -7.90   19.10
  16   0   3  -17.10   24.10
 -16   0  -3   37.40   24.40
 -18   0  -3   20.30   27.60
 -20   0  -3   30.70   30.20
 -22   0  -3   42.30   41.20
 -27  -1   3   11.30   46.20
 -27   1   3  -43.10   43.20
 -27   1   3   16.50   38.30
 -25  -1   3   71.19   45.10
 -25   1   3   56.09   45.40
 -25   1   3  121.39   37.80
 -23  -1   3   54.99   43.20
 -23   1   3   88.99   45.40
 -23   1   3   79.29   33.40
 -21  -1   3  -10.90   31.30
 -21   1   3   -7.30   31.20
 -19  -1   3  121.79   37.20
 -19   1   3  147.99   38.00
 -17  -1   3  296.37   41.40
 -17   1   3  329.37   45.90
 -15  -1   3 1251.57   60.89
 -15   1   3 1244.08   63.59
 -13  -1   3 1211.88   54.69
 -13   1   3 1288.27   59.89
 -11  -1   3  619.14   39.30
 -11   1   3  649.43   42.60
  11   1  -3  682.63   24.80
 -11   1   3  708.23   32.40
  -9  -1   3  231.28   27.20
  -9   1   3  236.08   28.60
  -9   1   3  225.28   20.30
   9   1  -3  234.58   16.40
  -7  -1   3 1046.30   38.70
  -7   1   3 1089.39   39.80
   7   1  -3 1048.50   23.40
  -7   1   3 1052.49   28.60
  -5  -1   3 1494.95   38.90
  -5   1   3 1418.06   37.80
   5   1  -3 1464.45   25.50
  -3  -1   3 1884.71   36.80
   3  -1  -3 1861.01   26.60
  -3   1   3 1945.11   33.80
  -3   1   3 1961.10   28.50
   3   1  -3 1979.30   29.10
  -1  -1   3  564.44   22.80
   1  -1  -3  567.04   19.70
   1   1  -3  553.84   17.80
  -1   1   3  574.74   20.10
   1  -1   3  610.64   27.50
  -1  -1  -3  616.44   23.90
  -1   1  -3  651.93   22.90
   1   1   3  620.34   24.60
  -1   1  -3  610.44   20.20
   3  -1   3  144.29   21.50
  -3  -1  -3  153.28   17.00
  -3   1  -3  124.89   16.40
   3   1   3  135.29   18.10
  -3   1  -3  131.09   13.50
  -5  -1  -3 2405.56   51.79
   5  -1   3 2362.56   44.80
  -5   1  -3 2374.56   50.99
   5   1   3 2355.36   49.50
  -5   1  -3 2443.26   45.20
  -7  -1  -3  976.90   34.60
   7  -1   3  962.70   34.20
  -7  -1  -3 1049.79   39.40
   7   1   3  981.10   38.10
  -7   1  -3 1033.50   34.30
  -7   1  -3  993.00   40.60
  -9  -1  -3 1490.55   47.10
   9  -1   3 1508.05   44.40
   9   1   3 1532.25   49.30
  -9   1  -3 1500.25   44.00
  -9   1  -3 1486.55   52.99
  11  -1   3  744.33   37.30
 -11  -1  -3  768.52   40.90
 -11   1  -3  828.02   38.20
  11   1   3  795.62   42.20
 -11   1  -3  838.42   46.70
 -13  -1  -3   79.69   23.30
  13  -1   3   74.19   21.90
  13   1   3   93.79   25.90
 -13   1  -3  112.19   22.50
 -13   1  -3  100.99   27.60
  15  -1   3   26.90   21.90
 -15  -1  -3    2.40   22.30
  15   1   3   11.00   25.80
 -15   1  -3   -9.90   22.40
 -17  -1  -3   60.69   28.80
 -17   1  -3   48.60   30.50
  17   1   3   61.99   30.80
 -19  -1  -3  131.29   36.80
 -19   1  -3  108.09   35.20
 -21   1  -3   89.59   41.50
 -23   1  -3   23.80   39.50
 -28  -2   3   27.70   49.50
 -28   2   3   13.40   51.29
 -28   2   3  -39.10   37.90
 -26  -2   3   75.79   48.20
 -26   2   3   15.20   35.80
 -26   2   3   37.20   46.90
 -24  -2   3   10.20   41.70
 -24   2   3   46.10   34.20
 -24   2   3   64.49   45.00
 -22  -2   3   52.89   40.30
 -22   2   3   -5.70   35.40
 -22   2   3   37.30   28.50
 -20  -2   3   44.50   32.70
 -20   2   3   31.70   34.30
 -20   2   3   52.19   26.30
 -18  -2   3  474.55   53.49
 -18   2   3  486.35   54.39
 -18   2   3  475.25   42.40
 -16  -2   3 1220.28   62.49
 -16   2   3 1278.47   67.79
  16   2  -3 1197.38   43.20
 -16   2   3 1183.18   50.49
 -14  -2   3 2031.90   70.19
  14   2  -3 1930.91   46.50
 -14   2   3 2041.80   55.89
 -14   2   3 1898.91   73.89
 -12  -2   3 2069.79   65.39
  12   2  -3 2106.99   45.10
 -12   2   3 2140.79   53.39
 -12   2   3 2216.48   72.99
 -10  -2   3  811.12   41.40
 -10   2   3  848.62   46.90
  10   2  -3  774.02   28.60
  -8  -2   3   15.40   15.10
  -8   2   3    7.70   15.90
   8   2  -3   18.70   10.50
  -6  -2   3 5846.31   79.89
  -6   2   3 5737.53   81.29
   6   2  -3 5871.91   56.89
  -4  -2   3 1195.68   39.80
  -4   2   3 1130.19   33.40
   4   2  -3 1145.29   27.60
  -4   2   3 1150.18   23.60
  -2  -2   3 4536.85   63.29
   2   2  -3 4593.74   49.20
  -2   2   3 4509.95   48.30
   0  -2   3   -1.40   18.80
   0   2  -3   31.00    9.20
   0   2   3   28.40   12.60
   2  -2   3    7.70   19.10
  -2   2  -3   18.70    8.80
  -2   2  -3   14.90   11.10
   2   2   3   16.60   13.70
   4  -2   3 2586.64   58.49
  -4   2  -3 2623.54   54.09
  -4   2  -3 2507.95   44.20
   4   2   3 2491.85   51.39
   6  -2   3 2761.32   65.89
  -6   2  -3 2799.92   49.30
  -6   2  -3 2704.13   62.19
   6   2   3 2773.52   57.79
   8  -2   3 4061.89   65.49
   8   2   3 3978.00   72.69
  -8   2  -3 4206.98   65.99
  -8   2  -3 4099.19   83.49
 -10  -2  -3  779.32   37.60
  10  -2   3  824.12   36.20
 -10   2  -3  783.92   46.80
 -10   2  -3  834.32   35.50
  10   2   3  848.72   44.00
  12  -2   3  562.94   35.60
 -12  -2  -3  513.05   37.70
 -12   2  -3  516.35   45.10
  12   2   3  556.84   43.80
 -12   2  -3  569.44   35.00
  14  -2   3  186.48   25.70
 -14  -2  -3  152.58   29.80
 -14   2  -3  175.88   25.00
  14   2   3  143.69   31.90
 -14   2  -3  149.49   33.40
 -16  -2  -3   -2.10   22.00
  16   2   3   20.20   30.80
 -16   2  -3   -4.90   26.20
 -18  -2  -3  181.98   37.20
  18   2   3  244.18   40.60
 -18   2  -3  271.17   48.00
 -20   2  -3  145.79   43.50
 -22   2  -3   10.70   38.30
 -24   2  -3   78.39   47.90
 -27  -3   3   28.60   48.60
 -27   3   3   55.79   51.99
 -27   3   3   16.70   38.90
 -25  -3   3  -50.19   40.50
 -25   3   3   22.00   42.40
 -25   3   3  -28.30   33.40
 -23  -3   3  -18.90   35.00
 -23   3   3    3.30   38.40
 -23   3   3   10.80   33.40
 -21  -3   3  -10.80   33.70
 -21   3   3    6.90   36.00
 -21   3   3   29.40   29.50
 -19  -3   3   78.29   34.20
 -19   3   3   59.89   33.90
 -19   3   3   88.49   28.40
 -17  -3   3  371.26   48.80
  17   3  -3  332.87   38.60
 -17   3   3  458.65   52.39
 -17   3   3  402.06   39.50
 -15  -3   3  594.54   49.20
  15   3  -3  540.95   38.30
 -15   3   3  618.54   39.10
 -15   3   3  604.54   51.69
 -13  -3   3  345.97   40.00
 -13   3   3  323.07   31.80
  13   3  -3  345.87   31.60
 -13   3   3  356.66   42.90
 -11  -3   3 2309.27   69.19
 -11   3   3 2276.17   73.69
  11   3  -3 2313.17   49.90
  -9  -3   3   63.79   21.10
   9   3  -3   83.59   16.20
  -9   3   3   45.60   21.20
  -7  -3   3   71.39   20.70
   7   3  -3   86.19   14.40
  -7   3   3   83.89   20.90
  -5  -3   3   88.69   21.30
   5   3  -3   77.69   13.60
  -5   3   3   76.49   17.10
  -3  -3   3 1646.04   51.09
   3   3  -3 1614.34   35.50
  -3   3   3 1580.94   32.40
  -3   3   3 1523.35   36.40
  -1  -3   3  423.06   39.10
  -1   3   3  375.16   26.20
   1   3  -3  449.95   23.00
   1  -3   3  286.67   36.80
  -1   3  -3  333.07   25.50
  -1   3  -3  331.47   20.10
   1   3   3  295.27   26.00
   3  -3   3  159.08   26.20
  -3   3  -3  165.08   18.00
  -3   3  -3  169.78   22.00
  -3   3  -3  154.78   13.20
   3   3   3  186.18   21.00
   5  -3   3  855.41   44.70
  -5   3  -3  773.92   29.40
   5   3   3  801.42   37.50
  -5   3  -3  824.12   38.60
  -5   3  -3  785.82   26.30
   7  -3   3 2320.67   70.99
  -7   3  -3 2373.76   67.39
   7   3   3 2581.04   61.79
  -7   3  -3 2372.96   50.09
   9  -3   3 1468.85   64.69
   9  -3   3 1374.76   43.10
  -9   3  -3 1440.16   58.09
   9   3   3 1468.95   53.49
  -9   3  -3 1447.86   42.80
  11  -3   3  606.74   34.80
 -11   3  -3  596.94   33.80
  11   3   3  600.04   46.40
 -11   3  -3  628.14   47.20
  13  -3   3  183.88   25.00
 -13  -3  -3  204.08   30.00
 -13   3  -3  158.98   22.70
  13   3   3  233.48   37.60
 -13   3  -3  194.08   35.70
 -15  -3  -3  335.17   40.20
  15  -3   3  303.37   40.20
  15   3   3  333.67   44.10
 -15   3  -3  352.76   47.80
 -17  -3  -3   93.49   36.10
  17   3   3   66.19   38.00
 -17   3  -3  104.19   38.00
  19   3   3   14.40   35.80
 -19   3  -3   28.70   37.10
 -21   3  -3    1.50   37.40
 -23   3  -3   88.79   44.40
 -23   3  -3   81.19   39.10
 -26  -4   3   36.80   50.29
 -26   4   3   66.59   49.70
 -24  -4   3   95.39   46.50
 -24   4   3   24.50   38.40
 -24   4   3   68.59   47.40
 -22  -4   3   -4.50   36.60
 -22   4   3   22.90   33.80
 -22   4   3   95.89   42.20
 -20  -4   3   55.79   34.00
 -20   4   3   50.59   35.30
 -20   4   3  -28.20   25.00
 -18  -4   3   54.19   30.50
  18   4  -3   28.70   28.60
 -18   4   3   29.90   30.80
 -16  -4   3  -10.20   25.50
  16   4  -3  -37.50   22.10
 -16   4   3  -14.70   24.40
 -14  -4   3   -4.30   24.30
 -14   4   3   14.50   23.40
  14   4  -3   -3.50   19.90
 -12  -4   3   18.70   22.80
  12   4  -3   25.40   18.90
 -12   4   3   49.20   23.20
 -10  -4   3   37.00   23.40
 -10   4   3   75.79   23.80
  10   4  -3   48.00   19.10
  -8  -4   3 1547.95   56.89
   8   4  -3 1654.13   43.80
  -8   4   3 1565.84   56.79
  -6  -4   3 1199.08   49.40
  -6   4   3 1216.58   45.70
   6   4  -3 1217.58   37.40
  -6   4   3 1237.78   27.30
  -4  -4   3 2594.74   65.19
  -4   4   3 2489.85   41.30
  -4   4   3 2425.66   52.59
   4   4  -3 2513.75   48.30
  -2  -4   3 2436.36   62.39
   2  -4  -3 2416.16   49.70
  -2   4   3 2414.06   44.90
   2   4  -3 2488.75   46.80
  -2   4   3 2323.07   44.50
   0  -4   3 2154.28   61.89
   0   4   3 2165.28   47.00
   0   4  -3 2126.99   44.10
   2  -4   3  823.22   48.50
   2   4   3  779.82   36.20
  -2   4  -3  825.02   39.50
  -2   4  -3  814.92   30.20
   4  -4   3  191.28   31.00
   4   4   3  184.78   25.10
  -4   4  -3  196.18   26.60
   6  -4   3   99.59   28.70
   6   4   3   91.29   23.50
  -6   4  -3   86.99   22.70
  -6   4  -3  102.29   16.00
  -6   4  -3   81.19   15.10
   8  -4   3  134.29   32.90
  -8   4  -3  161.08   20.30
  -8   4  -3  177.18   30.10
   8   4   3  126.69   27.30
  -8   4  -3  115.89   17.60
  10  -4   3   39.10   30.70
 -10   4  -3   58.19   19.30
  10   4   3   44.60   26.50
 -10   4  -3   46.70   24.10
 -10   4  -3   15.20   14.10
  12  -4   3  219.38   45.00
  12  -4   3  198.18   25.20
 -12  -4  -3  157.68   26.20
  12   4   3  198.38   36.70
 -12   4  -3  192.78   35.30
 -12   4  -3  134.39   21.90
 -12   4  -3  223.68   28.50
  14  -4   3    9.60   37.90
  14  -4   3   29.70   21.00
 -14  -4  -3   29.40   23.00
  14   4   3   36.90   33.00
 -14   4  -3   51.19   31.40
 -14   4  -3   78.89   26.10
 -14   4  -3   58.39   30.90
 -16   4  -3  251.87   37.60
 -16   4  -3  254.67   46.80
  16   4   3  305.57   46.10
 -18   4  -3  148.29   43.50
 -18   4  -3  142.19   37.80
  18   4   3  186.28   45.10
  20   4   3  308.97   52.09
 -20   4  -3  263.87   46.10
 -20   4  -3  287.17   55.39
  22  -4   3  212.88   56.39
 -22   4  -3   72.99   39.60
 -22   4  -3  119.19   49.90
  24  -4   3  173.58   54.39
 -24   4  -3   82.49   43.30
 -24   4  -3  114.89   48.80
 -25  -5   3   89.19   51.29
 -25   5   3  188.88   59.09
 -23  -5   3  176.98   53.29
 -23   5   3  265.37   57.89
 -21  -5   3  116.59   44.00
 -21   5   3   71.19   42.20
 -19  -5   3   41.80   34.90
  19   5  -3  -16.30   30.80
 -19   5   3    5.70   31.70
 -17  -5   3  -34.30   27.70
  17   5  -3   12.60   27.50
 -17   5   3  -10.00   27.90
 -15  -5   3  104.89   33.60
 -15   5   3   93.59   34.50
  15   5  -3  103.19   28.70
 -13  -5   3  211.48   37.40
 -13   5   3  245.98   38.30
  13   5  -3  268.47   30.70
 -11  -5   3   43.90   27.00
 -11   5   3    1.30   21.00
  11   5  -3    7.40   18.50
  -9  -5   3  226.28   34.00
   9   5  -3  271.27   30.40
  -9   5   3  292.17   37.60
  -7  -5   3 2199.88   68.49
  -7   5   3 2256.07   65.09
   7   5  -3 2182.98   53.39
  -7   5   3 2224.68   39.10
   5  -5  -3 3407.56   73.89
  -5  -5   3 3354.26   78.29
  -5   5   3 3429.86   70.29
   5   5  -3 3364.66   61.39
  -5   5   3 3391.76   50.99
  -3  -5   3 3937.61   83.89
   3  -5  -3 3929.91   71.99
   3   5  -3 3878.31   64.09
  -3   5   3 3953.20   58.99
  -3   5   3 3863.01   66.49
   1  -5  -3 2701.43   59.59
  -1  -5   3 2644.54   73.19
   1   5  -3 2553.94   52.19
  -1   5   3 2630.24   52.19
  -1   5   3 2592.54   53.39
   1  -5   3 2512.95   72.49
  -1   5  -3 2398.16   62.69
  -1   5  -3 2414.16   51.19
   1   5   3 2425.16   55.89
   3  -5   3   -6.90   28.50
   3   5   3   37.00   19.20
  -3   5  -3   20.90   13.40
  -3   5  -3    5.60   17.30
   5  -5   3   22.80   29.40
  -5   5  -3   27.30   12.80
   5   5   3   -8.20   20.30
  -5   5  -3   11.10   18.00
   7  -5   3  102.49   33.30
   7   5   3  137.09   28.40
  -7   5  -3  104.09   27.20
  -7   5  -3  117.09   17.40
   9  -5   3   11.90   31.60
   9   5   3    9.70   26.00
  -9   5  -3   27.80   13.90
  -9   5  -3   24.70   22.80
  11  -5   3    4.90   37.10
  11   5   3   31.10   30.20
 -11   5  -3    2.70   14.70
 -11   5  -3    3.50   18.50
 -11   5  -3  -17.00   22.00
  13  -5   3   66.49   45.40
  13  -5   3   55.99   21.90
 -13  -5  -3   63.69   32.40
 -13   5  -3   67.49   33.40
  13   5   3  102.99   37.60
 -13   5  -3   75.69   24.70
 -13   5  -3   65.29   20.90
  15  -5   3  381.06   61.59
 -15   5  -3  298.67   51.09
 -15   5  -3  420.36   43.00
  15   5   3  346.97   49.60
  17  -5   3  434.76   62.99
 -17   5  -3  446.36   60.79
 -17   5  -3  503.15   50.49
  17   5   3  581.34   65.19
  19  -5   3  661.53   79.99
 -19   5  -3  515.75   55.09
  19   5   3  586.84   67.59
 -19   5  -3  661.43   72.89
  21  -5   3  311.87   61.79
 -21   5  -3  207.58   47.00
 -21   5  -3  209.38   54.09
  23  -5   3  202.78   57.39
 -23   5  -3   98.99   50.29
 -23   5  -3   56.09   43.90
 -26   6   3  128.49   56.29
 -24  -6   3   84.29   50.99
 -24   6   3  210.58   56.19
 -22  -6   3  142.79   49.70
 -22   6   3  180.18   52.19
 -20  -6   3  -11.30   36.40
 -20   6   3   50.89   38.10
  20   6  -3  -42.50   33.40
 -18  -6   3    7.60   35.60
 -18   6   3   66.39   36.10
  18   6  -3  -69.39   29.60
 -16  -6   3    8.40   32.80
  16   6  -3   33.10   30.10
 -16   6   3    6.20   30.30
 -14  -6   3   24.80   32.70
  14   6  -3    9.80   25.90
 -14   6   3   -7.00   25.90
 -12  -6   3   36.40   31.80
  12   6  -3   31.30   23.60
 -12   6   3   -0.40   24.90
 -10  -6   3   34.70   30.80
  10   6  -3   56.39   21.20
 -10   6   3   23.30   23.50
   8  -6  -3  271.07   40.40
  -8  -6   3  296.97   41.20
   8   6  -3  298.67   32.50
  -8   6   3  258.67   24.50
  -8   6   3  300.57   36.80
   6  -6  -3 1517.85   64.09
  -6  -6   3 1429.56   65.99
  -6   6   3 1486.55   55.09
  -6   6   3 1500.25   40.20
   6   6  -3 1421.86   48.30
  -4  -6   3 2196.88   76.09
   4  -6  -3 2284.57   67.29
  -4   6   3 2184.48   49.80
  -4   6   3 2219.28   59.49
   4   6  -3 2173.18   55.79
  -2  -6   3 2609.34   80.39
   2  -6  -3 2606.14   70.29
  -2   6   3 2656.13   60.19
   2   6  -3 2489.85   57.59
  -2   6   3 2518.65   55.19
   0  -6   3 1533.95   70.99
   0  -6  -3 1603.84   57.69
   0   6   3 1526.15   50.09
   0   6  -3 1481.85   45.60
   2  -6   3  707.83   60.79
  -2   6  -3  668.13   44.80
  -2   6  -3  707.83   35.20
   2   6   3  720.43   43.40
   4  -6   3    3.80   32.80
  -4   6  -3   29.90   20.60
   4   6   3   31.80   22.30
  -4   6  -3   40.20   15.30
   6  -6   3   80.59   35.40
  -6   6  -3   69.99   24.60
   6   6   3   96.09   28.20
  -6   6  -3   80.19   16.40
   8  -6   3   -6.90   34.80
  -8   6  -3    1.00   13.50
   8   6   3   50.69   29.90
  -8   6  -3   -1.80   21.10
  10  -6   3  -15.10   35.90
 -10   6  -3   13.40   15.70
 -10   6  -3  -17.10   23.50
  10   6   3  -21.60   30.70
  12  -6   3   17.90   43.90
  12   6   3  -17.60   34.40
 -12   6  -3   -8.80   28.00
 -12   6  -3    5.90   18.00
  14  -6   3  311.07   61.49
 -14   6  -3  321.07   50.59
  14   6   3  270.77   49.50
  16  -6   3  301.17   60.69
 -16   6  -3  300.37   54.29
  16   6   3  297.47   50.49
  18  -6   3  417.36   67.99
 -18   6  -3  379.26   62.29
  18   6   3  323.47   53.89
  20  -6   3  293.57   64.79
  20   6   3  182.68   53.29
 -20   6  -3  235.98   54.79
 -20   6  -3  192.38   48.10
  22  -6   3  216.68   60.39
 -22   6  -3  111.69   50.19
 -25   7   3   38.60   48.70
 -23  -7   3  -59.69   41.60
 -23   7   3   83.09   50.09
 -21  -7   3  -24.60   39.60
 -21   7   3   26.40   39.80
  21   7  -3  -50.29   35.70
 -19  -7   3   94.59   46.10
 -19   7   3  128.09   45.00
  19   7  -3   11.10   36.60
 -17  -7   3   62.69   39.20
 -17   7   3   35.30   36.60
  17   7  -3   80.29   37.10
 -15  -7   3   88.19   39.70
 -15   7   3   51.49   33.40
  15   7  -3  105.89   34.50
 -13  -7   3  105.19   40.70
  13   7  -3   45.60   27.80
 -13   7   3   43.90   30.70
 -11  -7   3  134.89   40.80
  11  -7  -3    6.70   39.80
 -11   7   3   76.89   30.00
  11   7  -3   59.39   27.20
  -9  -7   3   86.49   39.00
   9  -7  -3   60.69   39.80
  -9   7   3   -3.00   16.40
   9   7  -3   39.60   23.10
  -9   7   3   29.70   27.50
  -7  -7   3  135.69   41.70
   7  -7  -3   99.09   36.50
  -7   7   3  104.49   20.60
  -7   7   3  119.29   28.10
   7   7  -3   60.19   22.30
   5  -7  -3  113.99   35.30
  -5  -7   3  114.79   42.50
  -5   7   3  111.19   21.50
  -5   7   3  194.98   29.60
   5   7  -3  108.39   22.90
  -3  -7   3  102.19   41.40
   3  -7  -3  136.39   37.40
   3   7  -3  106.79   22.00
  -3   7   3  179.88   27.60
  -3   7   3  156.18   23.50
  -1  -7   3  212.78   44.00
   1  -7  -3  239.58   39.40
   1   7  -3  203.88   25.70
  -1   7   3  286.67   34.30
  -1   7   3  237.88   27.80
  -1  -7  -3  471.95   52.99
   1  -7   3  369.56   49.20
   1   7   3  407.76   39.30
  -1   7  -3  407.96   34.50
   3  -7   3  -33.30   36.00
  -3   7  -3   -2.50   15.80
  -3   7  -3    0.70   21.90
   3   7   3   25.90   25.00
   5  -7   3  152.78   45.60
  -5   7  -3  121.69   21.30
  -5   7  -3  104.79   27.90
   5   7   3  159.78   32.90
   7  -7   3   66.99   42.20
  -7   7  -3   95.99   18.90
   7   7   3  146.39   35.00
  -7   7  -3   83.29   28.00
   9  -7   3  137.19   49.40
  -9   7  -3  175.58   23.80
   9   7   3  217.78   41.80
  -9   7  -3  139.99   35.20
  11  -7   3  158.68   51.19
 -11   7  -3  171.88   24.60
 -11   7  -3  155.78   40.00
  11   7   3  147.99   43.30
  13  -7   3   97.29   51.89
 -13   7  -3   65.39   36.90
  13   7   3   88.99   44.10
  15  -7   3  102.19   50.89
  15   7   3  150.08   48.80
 -15   7  -3  136.79   43.80
  17  -7   3   58.99   51.69
 -17   7  -3   27.10   40.20
  17   7   3   65.89   47.20
  19  -7   3   43.80   53.59
  19   7   3  -50.79   47.00
 -19   7  -3   58.29   42.90
  21  -7   3  183.38   60.79
 -21   7  -3   97.19   50.89
  24  -8  -3  157.28   59.59
 -24   8   3   69.19   50.19
  22  -8  -3   96.09   57.19
 -22  -8   3  -71.69   61.89
  22   8  -3  -98.69   41.60
 -22   8   3   -4.10   41.30
 -20  -8   3  -62.09   41.90
  20  -8  -3  114.59   57.09
 -20   8   3   45.00   40.20
  20   8  -3  -78.29   36.30
 -18  -8   3  218.78   54.09
  18  -8  -3  246.18   61.19
  18   8  -3  163.48   43.40
 -18   8   3  272.47   52.59
  16  -8  -3  256.57   57.79
 -16  -8   3  222.38   52.09
 -16   8   3  139.69   40.60
  16   8  -3  144.39   40.40
  14  -8  -3  252.07   57.89
 -14  -8   3  300.77   54.19
  14   8  -3  267.57   41.50
 -14   8   3  279.47   48.20
  12  -8  -3  268.57   57.89
 -12  -8   3  298.17   54.39
 -12   8   3  275.17   46.40
  12   8  -3  266.07   38.90
 -10  -8   3  153.18   47.20
  10  -8  -3  131.49   47.70
 -10   8   3  140.69   36.40
  10   8  -3  150.98   31.30
 -10   8   3  112.49   31.30
  -8  -8   3   10.60   46.00
   8  -8  -3   20.60   39.90
  -8   8   3  -33.10   20.10
  -8   8   3  -29.50   24.50
   8   8  -3   16.50   21.50
  -6  -8   3   69.09   47.50
   6  -8  -3  -10.50   40.20
  -6   8   3   33.60   22.50
  -6   8   3   51.69   28.60
   6   8  -3   46.30   21.60
   4  -8  -3   62.79   42.50
  -4  -8   3   31.60   46.70
  -4   8   3   87.59   25.80
  -4   8   3   77.19   26.80
   4   8  -3   81.59   22.80
  -2  -8   3   61.79   46.20
   2  -8  -3   23.70   41.10
  -2   8   3   76.39   24.70
   2   8  -3   49.90   21.70
  -2   8   3   44.50   25.30
   0  -8  -3  -49.50   40.70
   0  -8   3   -1.70   44.70
   0   8  -3  -21.10   17.40
   0   8   3   16.00   23.20
  -2  -8  -3   16.40   41.60
   2  -8   3    5.40   44.60
  -2   8  -3   11.20   25.00
   2   8   3   23.60   25.40
  -2   8  -3   15.40   19.50
  -4  -8  -3   -0.10   38.50
   4  -8   3   14.10   46.60
  -4   8  -3   16.50   18.80
  -4   8  -3  -16.20   25.30
   4   8   3   23.20   29.40
   6  -8   3  437.46   64.29
  -6   8  -3  516.35   37.90
  -6   8  -3  435.56   51.09
   6   8   3  527.75   53.69
   8  -8   3  484.95   65.39
  -8   8  -3  674.93   59.09
  -8   8  -3  638.74   38.90
   8   8   3  656.23   59.89
  10  -8   3  244.98   60.49
  10   8   3  317.97   46.60
 -10   8  -3  326.67   35.20
 -10   8  -3  209.78   43.30
  12  -8   3   92.99   54.19
 -12   8  -3  119.79   40.10
  12   8   3  152.68   44.70
  14  -8   3   92.19   52.59
  14   8   3   -4.70   40.40
 -14   8  -3   28.30   38.10
  16  -8   3   62.19   53.19
  16   8   3   -8.00   44.30
 -16   8  -3   18.80   41.90
  18  -8   3  104.99   55.59
 -18   8  -3   37.10   42.10
  18   8   3  -61.19   46.50
  20  -8   3  195.78   61.09
 -20   8  -3  104.79   49.80
  20   8   3  -73.89   48.80
 -23   9   3  -11.70   48.00
  21  -9  -3  141.99   57.39
  21   9  -3    0.00   46.70
 -21   9   3   38.30   47.80
 -19  -9   3  -23.60   44.60
  19  -9  -3   53.49   51.99
  19   9  -3  -42.30   40.00
 -19   9   3  -13.00   39.90
  17  -9  -3  172.48   58.09
 -17  -9   3  119.19   51.29
  17   9  -3   66.09   41.50
 -17   9   3  159.28   48.20
  15  -9  -3  342.87   64.19
 -15  -9   3  198.28   55.09
  15   9  -3  188.18   41.60
 -15   9   3  256.97   49.30
 -13  -9   3  187.88   54.29
  13  -9  -3  140.29   53.59
  13   9  -3  154.68   38.90
 -13   9   3  182.38   43.30
 -11  -9   3  216.18   58.09
  11  -9  -3  276.87   57.09
  11   9  -3  242.58   38.50
 -11   9   3  239.58   44.10
   9  -9  -3   28.50   47.80
  -9  -9   3   46.90   49.99
   9   9  -3   35.20   28.60
  -9   9   3  -27.70   21.70
  -9   9   3  -21.80   27.50
  -7  -9   3  147.29   53.99
   7  -9  -3   23.70   49.00
  -7   9   3   80.39   28.20
   7   9  -3   70.09   26.00
  -7   9   3   54.29   34.30
  -5  -9   3  163.68   57.59
   5  -9  -3  133.39   54.29
  -5   9   3  111.99   28.90
   5   9  -3  142.39   28.60
  -5   9   3  109.89   34.90
  -3  -9   3  138.39   57.79
   3  -9  -3  176.38   55.89
  -3   9   3  192.38   33.00
  -3   9   3  175.28   37.00
   3   9  -3  176.88   29.90
  -1  -9   3  127.09   55.59
   1  -9  -3  200.68   55.79
   1   9  -3  118.69   26.90
  -1   9   3  162.18   33.10
  -1  -9  -3    3.60   47.00
   1  -9   3  -54.99   51.99
  -1   9  -3   14.50   22.50
   1   9   3    9.00   27.30
  -3  -9  -3   40.20   48.40
   3  -9   3  -30.20   51.49
  -3   9  -3   -4.40   27.80
  -3   9  -3   14.90   22.40
   3   9   3   54.69   30.80
   5  -9   3   77.49   56.59
   5   9   3  219.48   39.70
  -5   9  -3  189.28   29.80
  -5   9  -3  157.08   37.40
   7  -9   3  293.27   67.49
  -7   9  -3  405.46   39.10
  -7   9  -3  278.27   45.90
   7   9   3  404.86   47.40
   9  -9   3  153.78   60.79
   9   9   3  210.58   41.30
  -9   9  -3  165.08   26.30
  -9   9  -3  139.69   36.90
  11  -9   3  146.19   55.79
  11   9   3  141.19   43.20
 -11   9  -3  119.69   40.00
  13  -9   3    7.80   50.59
 -13   9  -3   27.60   36.20
  13   9   3   -7.10   41.00
  15  -9   3  134.89   59.59
 -15   9  -3  -11.30   36.90
  15   9   3  -22.80   43.90
  17  -9   3  177.78   63.69
 -17   9  -3  121.59   47.90
  19  -9   3  166.08   63.19
 -19   9  -3   47.00   49.10
  19   9   3  -28.10   52.29
  20 -10  -3  234.08   65.09
  20  10  -3  -76.09   44.50
 -20  10   3   43.00   44.30
 -18 -10   3  -33.10   59.59
  18 -10  -3  120.49   56.99
 -18  10   3   -9.80   38.70
  18  10  -3  -32.90   42.60
  16 -10  -3   62.69   54.59
  16  10  -3  -86.39   36.20
 -16  10   3   10.60   36.00
  14 -10  -3   33.10   49.50
 -14 -10   3  -31.00   51.49
  14  10  -3   20.30   37.20
 -14  10   3   96.49   40.60
  12 -10  -3   55.49   51.09
 -12 -10   3   -7.20   51.99
  12  10  -3  -15.40   33.10
 -12  10   3   70.19   37.90
  10 -10  -3   64.29   51.89
 -10 -10   3   -9.60   52.29
  10  10  -3  -27.90   28.80
 -10  10   3   28.80   35.40
   8 -10  -3  -37.20   51.59
  -8 -10   3   12.50   57.69
  -8  10   3  -30.60   32.40
   8  10  -3   16.00   29.70
  -8  10   3  -54.19   24.90
  -6 -10   3   96.09   61.79
   6 -10  -3  163.68   61.99
   6  10  -3  120.39   33.80
  -6  10   3  153.88   33.80
  -6  10   3  147.99   42.60
   4 -10  -3   20.40   58.89
  -4 -10   3   26.60   60.89
  -4  10   3    1.30   35.20
   4  10  -3   33.30   29.70
  -4  10   3   10.10   30.10
  -2 -10   3   86.29   64.09
   2 -10  -3    2.10   56.59
  -2  10   3   50.59   33.60
   2  10  -3   79.69   30.10
   0 -10  -3 -102.59   54.49
   0 -10   3  -38.40   62.89
   0  10   3   39.40   34.30
   0  10  -3  -19.50   24.00
   2 -10   3   -6.00   62.19
  -2 -10  -3  -49.90   54.79
  -2  10  -3    6.70   24.10
   2  10   3    6.20   33.20
   4 -10   3  -13.20   59.29
   4  10   3   28.50   34.90
  -4  10  -3   16.00   25.30
  -4  10  -3   47.00   33.00
   6 -10   3  -45.40   58.69
   6  10   3   16.20   34.50
  -6  10  -3   17.30   32.70
  -6  10  -3   38.00   26.30
   8 -10   3   -2.90   58.49
   8  10   3    4.50   35.50
  -8  10  -3   -9.10   23.40
  -8  10  -3   41.20   35.60
  10 -10   3   77.39   57.59
  10  10   3   39.70   39.30
 -10  10  -3   35.70   33.70
  12 -10   3   60.09   58.89
  12  10   3  -16.20   40.30
 -12  10  -3   45.60   40.30
  14 -10   3    9.10   58.59
  14  10   3  -46.40   43.70
 -14  10  -3   40.30   43.10
  16 -10   3  138.79   65.99
 -16  10  -3   70.79   46.30
  16  10   3  -63.59   45.70
  18 -10   3  124.39   66.79
 -18  10  -3   74.19   54.09
  19 -11  -3  180.68   60.09
 -19  11   3   42.30   44.90
  19  11  -3  -62.39   46.90
  17 -11  -3  112.79   59.49
 -17  11   3   76.89   45.50
  17  11  -3  -94.19   43.60
  15 -11  -3   85.29   58.19
  15  11  -3  -63.89   38.90
 -15  11   3   59.59   41.20
 -13 -11   3  -45.60   55.39
  13 -11  -3   17.70   54.99
 -13  11   3   30.80   39.90
  13  11  -3  -29.00   37.70
  11 -11  -3   60.59   55.09
 -11 -11   3 -110.39   54.19
  11  11  -3  -29.90   31.70
 -11  11   3   -0.70   36.00
   9 -11  -3   92.19   56.39
  -9 -11   3 -116.69   53.99
  -9  11   3   -2.70   36.10
   9  11  -3  -26.50   30.80
   7 -11  -3   33.60   55.69
  -7 -11   3  -47.80   56.39
   7  11  -3    1.70   32.60
  -7  11   3   42.90   32.90
  -7  11   3   77.59   41.10
  -5 -11   3    2.80   62.79
   5 -11  -3   92.39   61.39
   5  11  -3    0.60   30.60
  -5  11   3   63.39   41.80
  -5  11   3   58.49   35.40
   3 -11  -3   -8.50   58.89
  -3 -11   3  -17.90   64.39
   3  11  -3  -34.10   28.60
  -3  11   3  -52.29   32.30
  -1 -11   3   95.49   66.39
   1 -11  -3   47.30   58.79
   1  11  -3   24.00   29.00
  -1  11   3   23.50   35.20
   1 -11   3    4.90   62.69
  -1 -11  -3  -49.30   61.79
  -1  11  -3  -27.40   26.60
   1  11   3  -49.40   33.30
   3 -11   3   35.40   63.09
   3  11   3  -50.49   33.90
  -3  11  -3  -41.50   25.40
   5 -11   3   80.69   62.39
   5  11   3  -17.00   36.50
  -5  11  -3  -16.90   32.60
  -5  11  -3  -19.30   24.70
   7 -11   3   38.90   60.59
  -7  11  -3  103.59   28.70
  -7  11  -3   27.60   38.40
   7  11   3   72.09   40.80
   9 -11   3   94.19   65.59
   9  11   3  -66.39   35.70
  -9  11  -3   23.50   37.60
  11 -11   3  120.89   64.99
  11  11   3    7.20   42.60
 -11  11  -3  110.19   46.70
  13 -11   3   68.69   64.89
 -13  11  -3   31.30   40.60
  13  11   3  -86.99   44.70
  15 -11   3  136.29   69.69
 -15  11  -3   41.40   47.30
  15  11   3 -109.69   48.00
 -18  12   3   86.29   52.69
  16 -12  -3  199.98   67.59
  16  12  -3  -43.40   48.10
 -16  12   3   99.19   51.79
 -14 -12   3  -51.79   83.29
  14 -12  -3  208.18   64.99
 -14  12   3  124.09   49.10
  14  12  -3  -38.50   41.30
 -12 -12   3 -110.39   58.99
  12 -12  -3   34.00   57.59
 -12  12   3  133.09   48.00
  12  12  -3  -41.00   39.10
  10 -12  -3   56.39   58.39
 -10 -12   3  -75.79   61.69
  10  12  -3  -42.40   36.20
 -10  12   3   28.70   42.20
   8 -12  -3  111.89   61.99
  -8 -12   3 -128.09   59.09
   8  12  -3  -27.00   33.20
  -8  12   3    4.00   39.00
  -6 -12   3  -32.70   62.19
   6 -12  -3   67.09   59.79
  -6  12   3  -67.99   34.30
   6  12  -3  -42.30   31.90
  -6  12   3  -47.90   40.40
  -4 -12   3  -43.90   62.39
   4 -12  -3   26.00   60.69
   4  12  -3   -8.40   34.20
  -4  12   3   60.79   40.10
  -2 -12   3   45.40   66.89
   2 -12  -3  -22.90   59.89
   2  12  -3  -21.70   30.70
  -2  12   3  -66.59   33.50
   0 -12   3  -65.49   60.99
   0  12   3  -85.89   32.70
   0  12  -3  -22.20   28.80
   2 -12   3   -3.00   66.69
   2  12   3  -35.20   36.10
  -2  12  -3   -8.60   28.20
   4 -12   3   71.69   65.69
   4  12   3   42.90   41.30
  -4  12  -3   54.89   30.40
   6 -12   3  204.68   72.79
  -6  12  -3   97.69   45.60
  -6  12  -3  110.89   33.90
   6  12   3   70.09   42.90
   8 -12   3  234.98   72.59
  -8  12  -3   39.80   42.80
   8  12   3   34.70   44.90
  10 -12   3  199.98   75.19
  10  12   3   23.20   45.70
 -10  12  -3  135.29   51.49
  12 -12   3   51.19   70.69
  12  12   3  -50.19   45.80
 -12  12  -3   45.60   45.20
  14 -12   3   89.59   71.99
 -14  12  -3   48.20   51.69
  14  12   3 -112.19   47.50
  15 -13  -3  216.48   69.89
  15  13  -3   -6.40   51.39
 -15  13   3   66.19   49.99
  13 -13  -3  126.89   65.19
 -13  13   3   22.00   49.70
  13  13  -3  -75.19   43.10
  11 -13  -3   82.79   64.09
 -11  13   3   77.99   51.99
  11  13  -3  -45.20   42.80
  -9 -13   3  -93.69   65.79
   9 -13  -3   36.90   63.59
   9  13  -3   -7.80   38.80
  -9  13   3  -14.80   47.40
   7 -13  -3   30.10   61.79
  -7 -13   3 -119.69   64.79
   7  13  -3  -60.79   34.40
  -7  13   3  -66.89   44.60
   5 -13  -3    2.30   64.39
   5  13  -3  -75.39   34.10
  -5  13   3 -114.89   35.90
  -3 -13   3 -133.59   68.19
  -3  13   3  -96.69   36.50
   3  13  -3  -21.80   33.30
  -1 -13   3  -40.90   70.49
  -1  13   3 -101.59   37.90
   1  13  -3  -15.80   32.90
   1 -13   3   65.59   72.39
   1  13   3  -68.89   38.40
  -1  13  -3    0.60   32.30
   3 -13   3   33.80   73.59
   3  13   3  -67.79   38.40
  -3  13  -3  -31.60   29.60
   5 -13   3  147.49   74.99
   5  13   3  -49.80   41.70
  -5  13  -3    6.80   32.80
   7 -13   3  200.88   75.49
   7  13   3  -21.70   46.10
   9 -13   3   62.39   68.59
   9  13   3    3.80   50.29
  -9  13  -3  -56.59   45.70
  11 -13   3  156.08   79.19
 -11  13  -3   -9.90   47.60
  11  13   3  -76.49   50.29
  10 -14  -3  203.18   73.49
  10  14  -3    8.00   46.00
 -10  14   3  -27.00   52.99
   8 -14  -3  109.59   67.99
   8  14  -3  -21.80   43.00
  -8  14   3  -99.59   49.70
   6 -14  -3  -21.80   75.09
   6  14  -3  -69.99   33.90
  -4 -14   3 -160.28   75.39
   4  14  -3  -14.10   35.80
  -4  14   3  -66.79   42.90
  -2 -14   3 -175.38   71.49
   2  14  -3  -55.39   34.20
  -2  14   3 -104.99   40.10
   0 -14   3  -11.20   77.29
   0  14  -3   14.50   36.90
   0  14   3  -36.90   45.40
   2 -14   3 -114.49   71.29
   2  14   3 -106.99   42.10
  -2  14  -3  -27.60   34.20
   4 -14   3  101.09   81.99
   4  14   3  -83.09   43.30
  -4  14  -3   -3.70   34.60
   6 -14   3  193.98   81.99
   6  14   3  -28.20   47.10
   8 -14   3  117.59   78.19
   8  14   3 -105.59   46.70
   5  15  -3  -11.20   41.20
  -3 -15   3 -157.88   82.29
   3  15  -3   37.80   42.50
  -3  15   3  -93.09   46.30
   1  15  -3  -30.50   39.40
   1 -15   3  -56.39   82.09
  -1  15  -3  -44.70   39.10
 -28   0   4   54.49   40.20
 -28   0   4   32.50   53.59
 -26   0   4    0.40   41.70
 -26   0   4   17.30   31.50
 -24   0   4   36.30   41.00
 -22   0   4  -15.60   31.50
 -20   0   4  618.14   61.99
 -18   0   4  389.86   48.80
 -16   0   4  190.58   35.60
 -14   0   4  328.67   40.00
 -12   0   4   60.19   21.80
 -10   0   4 2091.39   60.29
  -8   0   4 1016.20   40.10
  -8   0   4  990.20   28.20
   6   0  -4 5049.09   42.70
  -6   0   4 4891.51   69.59
  -4   0   4 2789.32   46.50
   4   0  -4 2787.12   34.80
  -2   0   4  379.16   19.70
   2   0  -4  342.27   16.40
   0   0  -4 4374.06   52.79
   0   0   4 4458.45   54.59
  -2   0  -4 2322.47   44.10
   2   0   4 2342.37   45.00
   4   0   4 4244.18   64.49
  -4   0  -4 4309.67   64.79
  -6   0  -4 4511.75   71.89
   6   0   4 4582.34   71.39
  -6   0  -4 4499.95   69.39
  -8   0  -4  403.36   29.20
   8   0   4  347.27   30.70
  -8   0  -4  404.66   30.10
 -10   0  -4  242.88   28.80
  10   0   4  264.27   28.50
 -10   0  -4  212.98   25.80
 -12   0  -4 1317.97   56.29
 -12   0  -4 1336.27   54.49
  12   0   4 1302.37   52.49
  14   0   4 1080.09   54.29
 -14   0  -4 1085.59   57.29
 -16   0  -4  141.09   32.60
  16   0   4  175.48   34.00
 -18   0  -4   52.29   29.00
 -20   0  -4   -7.10   40.20
 -27  -1   4   37.90   45.40
 -27   1   4   12.20   48.40
 -27   1   4  -19.90   36.40
 -25  -1   4   28.70   41.10
 -25   1   4   -5.60   41.00
 -25   1   4   18.30   32.10
 -23  -1   4   44.60   39.40
 -23   1   4   61.09   28.70
 -23   1   4   23.90   37.70
 -21  -1   4   38.00   34.00
 -21   1   4   61.59   36.40
 -21   1   4   48.40   27.30
 -19  -1   4  197.48   40.20
 -19   1   4  149.88   38.90
 -19   1   4  130.49   29.40
 -17  -1   4  131.09   33.70
 -17   1   4  109.39   32.30
 -17   1   4   87.69   23.50
 -15  -1   4   21.70   21.80
 -15   1   4   26.90   18.20
 -15   1   4   39.40   26.20
 -13  -1   4   36.90   20.50
 -13   1   4   78.69   24.80
 -13   1   4   58.09   18.20
 -11  -1   4   81.99   21.20
 -11   1   4  113.79   18.50
 -11   1   4   95.39   24.00
  -9  -1   4  453.45   32.90
  -9   1   4  445.96   24.50
  -9   1   4  434.96   33.80
   9   1  -4  388.86   18.70
  -7  -1   4  907.11   37.80
  -7   1   4  888.21   37.00
   7   1  -4  921.21   23.90
  -5  -1   4 3798.82   61.49
  -5   1   4 3793.62   58.29
  -5   1   4 3793.22   39.90
   5   1  -4 3829.12   43.80
   3  -1  -4  271.57   16.60
  -3  -1   4  348.97   26.20
  -3   1   4  321.57   17.90
   3   1  -4  283.27   16.00
  -3   1   4  270.87   19.50
  -1  -1   4  523.15   30.20
   1  -1  -4  490.85   22.10
  -1   1   4  489.75   24.70
   1   1  -4  497.75   20.20
  -1  -1  -4 1784.62   40.70
   1  -1   4 1782.42   42.80
  -1   1  -4 1860.21   36.20
  -1   1  -4 1813.32   36.80
   1   1   4 1848.32   42.20
  -3  -1  -4 1122.29   36.70
   3  -1   4 1146.79   38.10
  -3   1  -4 1078.39   31.80
  -3   1  -4 1143.89   33.60
   3   1   4 1155.88   37.60
   5  -1   4 1342.27   38.70
   5  -1   4 1433.36   45.40
  -5  -1  -4 1407.86   43.50
   5   1   4 1456.75   44.30
  -5   1  -4 1373.86   41.70
  -5   1  -4 1392.66   39.20
  -7  -1  -4   37.40   15.50
   7  -1   4   13.50   12.90
   7   1   4   34.30   17.00
  -7   1  -4   51.79   16.80
  -7   1  -4   13.80   11.50
   9  -1   4  133.29   20.90
  -9  -1  -4  101.19   20.40
  -9  -1  -4  131.09   20.60
  -9   1  -4  157.98   25.90
   9   1   4  108.99   22.00
  -9   1  -4  139.79   20.70
 -11  -1  -4  489.75   35.40
  11  -1   4  482.85   36.60
 -11   1  -4  505.95   41.50
 -11   1  -4  455.85   35.00
  11   1   4  478.35   39.50
  13  -1   4  664.33   44.30
 -13  -1  -4  630.34   44.10
 -13   1  -4  658.03   42.70
  13   1   4  600.64   47.30
 -13   1  -4  608.34   48.40
  15  -1   4  251.27   33.10
 -15  -1  -4  215.28   35.90
 -15   1  -4  218.08   37.00
  15   1   4  229.08   36.30
 -15   1  -4  211.08   31.10
 -17  -1  -4   -2.40   23.40
  17   1   4  -17.60   28.30
 -17   1  -4   18.70   27.30
 -19   1  -4   -6.80   27.30
 -21   1  -4   47.40   37.50
 -28  -2   4   78.99   52.09
 -28   2   4   49.70   41.00
 -28   2   4  -16.60   48.10
 -26  -2   4    2.40   42.80
 -26   2   4   18.40   37.60
 -26   2   4   47.60   47.40
 -24  -2   4    1.80   39.40
 -24   2   4  -38.90   35.00
 -24   2   4   28.20   32.40
 -22  -2   4   -6.70   34.30
 -22   2   4   18.80   27.60
 -22   2   4    1.20   36.60
 -20  -2   4   20.20   32.70
 -20   2   4   16.70   31.10
 -20   2   4  -14.80   25.30
 -18  -2   4   16.30   26.60
 -18   2   4   35.10   23.00
 -18   2   4   -7.10   24.40
 -16  -2   4   31.40   23.90
  16   2  -4    8.00   16.50
 -16   2   4   15.80   23.00
 -16   2   4   17.40   20.00
 -14  -2   4    6.80   21.80
  14   2  -4   25.60   14.60
 -14   2   4   24.70   17.60
 -14   2   4   35.40   24.30
 -12  -2   4   57.49   22.40
  12   2  -4   51.99   14.90
 -12   2   4   73.49   19.10
 -12   2   4   55.09   24.50
 -10  -2   4  202.28   28.70
 -10   2   4  180.28   29.50
  10   2  -4  150.28   17.00
  -8  -2   4  431.76   33.10
  -8   2   4  428.36   33.90
   8   2  -4  424.46   22.40
  -6  -2   4 2030.90   52.39
  -6   2   4 2070.49   51.59
   6   2  -4 2090.09   37.80
  -4  -2   4 1846.42   49.30
  -4   2   4 1788.82   33.90
   4   2  -4 1864.91   35.60
  -4   2   4 1790.12   40.10
  -2  -2   4  228.88   26.40
   2  -2  -4  173.48   18.60
   2   2  -4  161.28   17.20
  -2   2   4  160.88   17.10
   0  -2   4   14.10   20.10
   0  -2  -4   12.10   10.60
   0   2   4   -5.90   12.00
   0   2  -4   19.60    9.00
   2  -2   4   95.79   21.50
  -2  -2  -4   84.39   15.70
   2   2   4   93.29   17.70
  -2   2  -4   76.39   12.70
  -2   2  -4   91.99   16.90
   4  -2   4  224.18   27.40
   4   2   4  203.58   23.10
  -4   2  -4  195.38   22.70
  -4   2  -4  181.68   20.10
   6  -2   4   42.10   13.40
   6  -2   4   57.59   21.50
  -6   2  -4   29.00   12.10
   6   2   4   39.60   18.30
  -6   2  -4   45.10   16.00
   8  -2   4   85.49   26.30
   8  -2   4   82.29   17.80
  -8   2  -4   91.09   22.10
  -8   2  -4   89.69   16.80
   8   2   4   68.19   21.70
  10  -2   4   13.70   15.10
 -10   2  -4    7.00   13.10
  10   2   4   -3.70   19.50
 -10   2  -4   -5.30   17.40
 -12  -2  -4    1.50   15.50
  12  -2   4   17.80   19.00
  12   2   4  -36.80   23.50
 -12   2  -4   14.30   16.00
 -12   2  -4    0.40   20.80
 -14  -2  -4   20.80   20.60
  14  -2   4   27.90   21.60
  14   2   4    4.00   28.60
 -14   2  -4   16.00   24.50
 -14   2  -4   29.40   21.00
  16  -2   4   93.69   36.60
 -16  -2  -4   55.99   26.90
 -16   2  -4   90.99   33.40
  16   2   4  132.99   36.50
 -18   2  -4   38.10   31.90
  18   2   4   13.70   33.40
 -20   2  -4   30.00   35.90
 -22   2  -4   31.30   39.60
 -27  -3   4   12.60   47.10
 -27   3   4  -28.60   36.70
 -27   3   4   26.90   47.90
 -25  -3   4    4.60   43.50
 -25   3   4  -10.70   31.70
 -25   3   4   18.50   44.90
 -23  -3   4   24.30   39.60
 -23   3   4   51.79   32.50
 -23   3   4   19.20   37.60
 -21  -3   4  141.29   42.50
 -21   3   4  100.99   40.00
 -21   3   4  102.69   31.60
 -19  -3   4  438.56   55.59
 -19   3   4  358.06   38.80
 -19   3   4  497.45   58.69
 -17  -3   4  271.47   41.70
 -17   3   4  247.08   42.00
  17   3  -4  227.78   28.60
 -17   3   4  253.47   33.00
 -15  -3   4  178.28   34.00
  15   3  -4  174.88   23.40
 -15   3   4  191.88   35.40
 -13  -3   4  194.38   32.50
 -13   3   4  207.28   34.00
  13   3  -4  180.38   21.70
 -11  -3   4  617.44   45.40
 -11   3   4  584.84   44.60
  11   3  -4  653.63   31.50
  -9  -3   4  731.03   43.50
  -9   3   4  764.82   44.30
   9   3  -4  739.73   30.40
  -7  -3   4 2803.92   66.39
   7   3  -4 2769.62   48.30
  -7   3   4 2757.02   64.79
  -5  -3   4  354.86   35.80
  -5   3   4  298.67   20.20
  -5   3   4  300.57   25.80
   5   3  -4  316.57   21.80
  -3  -3   4  998.10   45.20
  -3   3   4  919.81   30.10
   3   3  -4  948.81   30.40
  -1  -3   4  724.53   42.30
  -1   3   4  677.73   30.70
   1   3  -4  669.23   26.80
   1  -3   4 2130.49   57.99
   1   3   4 2193.48   49.70
  -1   3  -4 2134.69   50.79
  -1   3  -4 2125.59   42.80
   3  -3   4 1465.95   53.59
   3   3   4 1449.65   45.80
  -3   3  -4 1480.65   47.10
  -3   3  -4 1409.46   37.80
   5  -3   4 1194.98   52.39
  -5   3  -4 1182.58   46.70
  -5   3  -4 1242.48   38.20
   5   3   4 1206.38   46.70
   7  -3   4  331.47   43.20
   7   3   4  327.77   37.10
  -7   3  -4  348.07   27.00
  -7   3  -4  320.57   33.60
   9  -3   4   31.80   15.70
   9  -3   4   33.30   27.60
  -9   3  -4   25.10   21.10
  -9   3  -4   24.40   14.00
   9   3   4   30.40   21.70
  11  -3   4  336.07   33.30
  11  -3   4  281.07   43.40
  11   3   4  259.97   36.00
 -11   3  -4  292.47   30.00
 -11   3  -4  323.17   40.20
  13  -3   4  326.87   37.70
  13  -3   4  259.97   47.30
  13   3   4  285.47   40.40
 -13   3  -4  231.08   28.60
 -13   3  -4  284.77   40.50
  15  -3   4  790.82   49.10
 -15   3  -4  797.52   61.69
  15   3   4  785.92   63.09
 -17   3  -4   47.00   32.20
  17   3   4    6.30   33.70
 -19   3  -4   43.20   34.60
  19   3   4  -41.60   36.50
 -21   3  -4   32.50   38.10
  23  -3   4  127.39   47.10
 -23   3  -4   58.59   41.20
 -26  -4   4   27.60   46.70
 -26   4   4   28.30   47.70
 -24  -4   4   55.49   43.10
 -24   4   4   44.40   42.10
 -22  -4   4   24.50   37.60
 -22   4   4   30.40   38.10
 -20  -4   4  223.78   47.90
 -20   4   4  144.09   41.70
 -18  -4   4  396.66   53.29
  18   4  -4  425.26   44.40
 -18   4   4  315.97   48.20
 -16  -4   4  309.87   44.00
  16   4  -4  356.86   38.30
 -16   4   4  381.96   50.59
 -14  -4   4   39.20   26.80
 -14   4   4   57.99   26.10
  14   4  -4   21.00   19.70
 -12  -4   4  468.05   45.90
 -12   4   4  419.36   43.70
  12   4  -4  427.66   32.30
 -10  -4   4  504.05   45.40
  10   4  -4  449.36   32.10
 -10   4   4  452.05   41.90
  -8  -4   4 1339.57   56.89
  -8   4   4 1373.96   54.09
   8   4  -4 1317.87   41.40
  -6  -4   4  748.83   47.40
  -6   4   4  752.32   26.80
   6   4  -4  789.02   32.80
  -6   4   4  763.72   37.80
  -4  -4   4  419.96   42.90
  -4   4   4  323.87   25.60
  -4   4   4  351.66   25.40
   4   4  -4  372.06   25.50
  -2  -4   4   58.99   25.60
  -2   4   4   41.20   15.30
   2   4  -4   34.60   12.90
   0  -4   4 1408.06   56.19
   0   4   4 1418.66   43.60
   0   4  -4 1422.46   39.30
   2  -4   4 1727.83   62.59
  -2   4  -4 1750.62   43.50
  -2   4  -4 1799.52   54.79
   2   4   4 1770.12   50.79
   4  -4   4 1426.76   61.19
   4   4   4 1428.66   51.09
  -4   4  -4 1371.06   40.90
  -4   4  -4 1389.56   52.79
   6  -4   4  292.27   39.80
  -6   4  -4  309.67   35.50
   6   4   4  329.57   33.90
  -6   4  -4  311.67   26.50
  -6   4  -4  313.77   23.80
   8  -4   4   15.60   27.80
   8   4   4    4.70   22.20
  -8   4  -4   19.20   18.00
  -8   4  -4   15.80   14.30
  -8   4  -4   21.80   16.00
  10  -4   4   36.10   34.50
  10   4   4   50.39   27.90
 -10   4  -4   25.20   22.20
 -10   4  -4    9.80   15.30
 -10   4  -4    9.10   18.20
  12  -4   4  584.64   42.00
  12  -4   4  514.65   64.19
 -12   4  -4  508.35   50.99
 -12   4  -4  560.74   39.10
  12   4   4  600.74   55.89
  14  -4   4  214.98   49.80
  14  -4   4  269.97   33.40
  14   4   4  320.27   47.30
 -14   4  -4  300.97   46.90
 -14   4  -4  233.28   33.20
  16  -4   4  187.48   49.50
 -16   4  -4  170.88   35.80
  16   4   4  157.08   44.60
 -16   4  -4  183.88   42.20
  18  -4   4   90.79   46.40
 -18   4  -4  -34.10   29.40
 -18   4  -4   26.50   33.80
  18   4   4   97.29   41.50
  20  -4   4   59.19   47.20
 -20   4  -4   21.10   38.50
  20   4   4  -13.30   42.30
 -20   4  -4    8.10   34.70
  22  -4   4  141.19   50.89
 -22   4  -4    4.10   40.30
 -22   4  -4   -6.80   39.70
 -27  -5   4   38.30   53.99
 -27   5   4   56.29   51.29
 -25  -5   4   49.30   49.60
 -25   5   4   30.20   44.90
 -23  -5   4   24.80   40.40
 -23   5   4   38.90   41.70
 -21  -5   4  -18.10   36.40
 -21   5   4   44.70   37.30
 -19  -5   4    3.00   33.10
  19   5  -4    5.70   29.00
 -19   5   4   18.40   31.60
 -17  -5   4   32.40   35.40
 -17   5   4   37.10   31.30
  17   5  -4   66.89   27.80
 -15  -5   4   25.20   32.10
  15   5  -4   23.20   23.90
 -15   5   4   17.90   28.40
 -13  -5   4   37.60   28.90
  13   5  -4   47.70   21.70
 -13   5   4   12.60   24.10
 -11  -5   4   52.19   27.50
  11   5  -4   29.30   18.60
 -11   5   4   71.59   26.20
  -9  -5   4  178.78   34.00
   9   5  -4  188.68   23.80
  -9   5   4  284.47   37.10
  -7  -5   4   20.20   28.10
   7   5  -4   32.10   16.60
  -7   5   4    1.90   12.90
  -7   5   4   -5.90   18.00
  -5  -5   4   85.99   31.90
   5  -5  -4   81.29   26.00
  -5   5   4   93.99   20.60
  -5   5   4   81.19   17.80
   5   5  -4   79.39   18.40
  -3  -5   4    1.00   28.10
   3  -5  -4    8.90   19.80
   3   5  -4   11.10   14.40
  -3   5   4   14.80   13.90
  -3   5   4   -6.70   15.90
  -1  -5   4  215.08   36.90
   1   5  -4  224.38   25.40
  -1   5   4  168.78   23.70
   1  -5   4  870.11   55.69
  -1   5  -4  879.41   43.70
   1   5   4  863.61   42.50
  -1   5  -4  889.41   36.50
   3  -5   4    5.60   31.10
  -3   5  -4   17.60   18.80
  -3   5  -4   27.80   14.20
   3   5   4   32.30   21.60
   5  -5   4    8.00   28.80
  -5   5  -4   49.60   14.60
   5   5   4   75.69   24.80
  -5   5  -4   61.79   22.90
   7  -5   4   14.00   31.20
  -7   5  -4   26.40   22.20
   7   5   4   10.10   25.40
  -7   5  -4   18.60   13.50
   9  -5   4   12.20   32.80
  -9   5  -4   27.90   17.60
  -9   5  -4   14.70   21.50
   9   5   4   29.10   29.60
  -9   5  -4   -1.60   15.50
  11  -5   4   77.79   43.40
 -11   5  -4   47.50   21.10
 -11   5  -4   38.60   26.30
 -11   5  -4   27.10   17.50
  11   5   4   19.50   32.00
  13  -5   4   -2.10   43.70
  13  -5   4   26.40   22.50
 -13   5  -4    7.90   26.60
 -13   5  -4  -20.50   22.90
  13   5   4  -15.80   36.30
 -13   5  -4  -53.49   16.90
  15  -5   4  108.39   51.19
 -15   5  -4   91.39   31.20
 -15   5  -4   84.49   37.70
  15   5   4  124.99   43.10
  17  -5   4   26.70   45.90
  17   5   4  -21.40   39.20
 -17   5  -4   20.00   32.20
 -17   5  -4   15.50   37.50
  19  -5   4   38.60   46.20
 -19   5  -4  -14.80   34.40
  19   5   4  -33.80   43.10
 -19   5  -4   38.10   41.50
  21  -5   4  105.49   48.70
 -21   5  -4   48.60   39.90
 -21   5  -4   14.00   44.00
 -26  -6   4  -12.70   51.89
 -26   6   4   68.39   52.29
 -24  -6   4   64.09   49.60
 -24   6   4   16.50   44.40
 -22  -6   4   -6.20   41.40
 -22   6   4   43.00   41.60
 -20  -6   4   36.90   41.10
  20   6  -4  -18.60   33.70
 -20   6   4   36.40   39.00
 -18  -6   4  101.49   41.20
  18   6  -4   85.69   34.30
 -18   6   4   35.70   34.40
 -16  -6   4    7.50   34.30
  16   6  -4    3.80   28.50
 -16   6   4  -12.30   27.00
 -14  -6   4   12.20   31.10
 -14   6   4   -8.80   26.80
  14   6  -4  -15.10   23.00
 -12  -6   4  162.28   38.60
  12   6  -4   91.29   25.90
 -12   6   4   72.79   29.20
 -10  -6   4  205.48   39.70
 -10   6   4  192.68   34.20
  10   6  -4  223.08   27.90
  -8  -6   4  568.44   55.29
   8   6  -4  604.84   38.50
  -8   6   4  523.15   28.30
  -8   6   4  590.64   43.10
  -6  -6   4  711.83   57.49
   6  -6  -4  723.33   52.19
  -6   6   4  756.82   43.50
  -6   6   4  727.53   34.10
   6   6  -4  790.32   40.10
  -4  -6   4  159.48   38.10
   4  -6  -4  147.19   29.90
  -4   6   4  122.09   22.00
   4   6  -4  103.19   21.20
  -4   6   4  106.79   21.80
   2  -6  -4  176.08   32.70
  -2  -6   4  181.18   39.50
  -2   6   4  165.08   23.90
  -2   6   4  188.28   26.80
   2   6  -4  160.78   24.10
   0  -6   4   58.29   37.00
   0   6  -4   66.09   18.20
   0   6   4   96.59   25.10
   2  -6   4 1052.89   67.49
  -2   6  -4 1008.70   51.59
  -2   6  -4 1060.79   41.20
   2   6   4 1068.19   49.80
   4  -6   4  222.18   45.20
  -4   6  -4  196.18   32.20
   4   6   4  234.18   32.30
  -4   6  -4  249.68   27.60
   6  -6   4   91.79   38.30
  -6   6  -4  153.98   21.30
  -6   6  -4  193.18   33.40
   6   6   4  183.78   32.90
   8  -6   4   71.99   42.00
  -8   6  -4   70.39   27.80
   8   6   4   64.29   31.40
  -8   6  -4   58.59   18.40
  10  -6   4   17.00   41.60
 -10   6  -4   17.60   17.20
 -10   6  -4   20.00   26.20
  10   6   4   20.70   34.70
  12  -6   4   68.79   48.20
 -12   6  -4   54.59   32.60
 -12   6  -4   80.09   22.30
  12   6   4   77.49   40.70
  14  -6   4   72.49   49.70
 -14   6  -4   55.69   35.50
  14   6   4   -4.80   38.70
  16  -6   4   19.90   45.90
 -16   6  -4   49.20   37.90
 -16   6  -4  -28.10   30.50
  16   6   4  -45.00   40.60
  18  -6   4  107.39   52.39
  18   6   4   33.60   46.70
 -18   6  -4   39.50   40.00
 -18   6  -4   18.80   35.20
  20  -6   4  157.78   56.09
  20   6   4  -34.60   47.20
 -20   6  -4  -24.20   39.40
 -20   6  -4   44.50   43.20
  22  -6   4  164.98   55.39
 -22   6  -4   91.09   49.40
 -22   6  -4  -20.60   43.20
 -25  -7   4  -41.20   48.60
 -25   7   4   67.79   50.79
 -23  -7   4  -76.39   42.80
 -23   7   4   10.50   43.90
 -21  -7   4   14.50   46.10
 -21   7   4   83.09   45.70
  21   7  -4   -0.20   37.50
 -19  -7   4  107.09   48.10
 -19   7   4  106.29   44.40
  19   7  -4   28.00   35.90
 -17  -7   4  169.78   48.30
 -17   7   4  189.78   45.50
  17   7  -4  242.58   41.50
 -15  -7   4   43.70   38.60
 -15   7   4   33.90   31.20
  15   7  -4   24.00   30.00
 -13  -7   4   42.40   37.10
  13   7  -4    3.30   25.80
 -13   7   4   -6.60   27.10
 -11  -7   4  298.47   48.50
  11  -7  -4  272.77   51.19
  11   7  -4  282.97   34.70
 -11   7   4  248.88   40.00
  -9  -7   4  924.21   70.09
   9  -7  -4  815.22   64.29
   9   7  -4  836.42   48.20
  -9   7   4  806.52   55.09
  -9   7   4  793.32   36.90
  -7  -7   4 1016.30   68.79
   7  -7  -4  984.30   62.59
  -7   7   4 1029.60   52.89
  -7   7   4 1003.30   41.20
   7   7  -4  978.30   48.10
   5  -7  -4  447.06   50.99
  -5  -7   4  384.46   51.99
  -5   7   4  494.75   38.80
   5   7  -4  434.36   37.10
  -5   7   4  456.55   35.30
  -3  -7   4   33.80   40.30
   3  -7  -4  -11.30   31.50
   3   7  -4   -2.90   15.60
  -3   7   4   27.40   20.40
  -3   7   4   22.90   21.10
   1  -7  -4  140.59   36.50
  -1  -7   4  115.29   44.50
  -1   7   4   74.49   24.10
   1   7  -4   66.79   20.40
  -1   7   4   82.69   22.80
   1  -7   4 1526.15   79.79
   1   7   4 1472.75   57.19
  -1   7  -4 1461.15   49.90
   3  -7   4  664.73   71.49
  -3   7  -4  663.33   38.60
   3   7   4  682.73   49.70
  -3   7  -4  672.23   50.49
   5  -7   4  715.53   77.19
  -5   7  -4  669.63   52.99
   5   7   4  670.93   53.39
  -5   7  -4  662.03   38.00
   7  -7   4   70.69   47.30
  -7   7  -4  106.09   21.10
  -7   7  -4   75.89   31.20
   7   7   4  100.49   35.70
   9  -7   4  -45.90   42.60
   9   7   4   14.00   37.10
  -9   7  -4    9.40   17.80
  -9   7  -4   -6.60   27.00
  11  -7   4  107.79   54.69
 -11   7  -4  137.49   24.90
 -11   7  -4   87.89   36.90
  11   7   4   76.49   42.50
  13  -7   4   77.89   49.80
  13   7   4   45.90   42.90
 -13   7  -4   50.29   37.10
  15  -7   4  121.39   53.49
  15   7   4   98.89   47.10
 -15   7  -4   69.69   39.80
  17  -7   4  106.89   55.69
 -17   7  -4   79.69   45.70
  17   7   4    3.00   47.60
  19  -7   4   99.89   52.29
 -19   7  -4   19.60   43.90
  19   7   4  -24.80   50.69
  21  -7   4  202.08   61.09
  21   7   4  -36.20   51.59
 -21   7  -4   48.50   45.10
 -24  -8   4  -92.79   64.39
 -24   8   4    6.90   45.90
 -22  -8   4  -29.10   48.90
 -22   8   4   47.10   45.30
 -20  -8   4  -56.29   43.90
  20   8  -4  -22.20   40.40
 -20   8   4   41.50   41.30
 -18  -8   4   20.40   46.90
 -18   8   4   46.10   37.80
  18   8  -4  -66.99   33.00
  16  -8  -4   68.79   49.60
 -16  -8   4   35.00   45.50
  16   8  -4   27.60   35.60
 -16   8   4   79.29   38.20
 -14  -8   4   28.70   44.60
  14  -8  -4   57.59   50.59
 -14   8   4   40.60   32.40
  14   8  -4  -40.10   29.80
 -12  -8   4   84.59   46.40
  12  -8  -4  -41.60   41.90
  12   8  -4   25.30   30.40
 -12   8   4   70.09   33.70
  10  -8  -4  145.49   47.70
 -10  -8   4  148.89   48.60
 -10   8   4   87.09   34.10
  10   8  -4   94.19   28.20
  -8  -8   4  232.88   53.89
   8  -8  -4  264.97   48.70
   8   8  -4  416.86   43.50
  -8   8   4  326.77   42.10
  -8   8   4  247.78   29.20
  -6  -8   4  147.79   51.69
   6  -8  -4  126.09   44.20
  -6   8   4  136.59   32.40
  -6   8   4   67.29   25.50
   6   8  -4  104.99   24.90
   4  -8  -4  113.79   43.30
  -4  -8   4   54.09   47.90
  -4   8   4   88.29   29.00
   4   8  -4   54.39   22.10
  -4   8   4   76.19   25.80
  -2  -8   4   16.80   46.10
   2  -8  -4   25.70   40.80
  -2   8   4   27.30   23.90
   2   8  -4   26.60   19.40
  -2   8   4    9.90   24.20
   0  -8   4  239.68   54.39
   0   8   4  195.88   32.30
   0   8  -4  188.88   26.30
   2  -8   4  152.18   51.59
   2   8   4  178.88   33.90
  -2   8  -4  175.68   25.30
   4  -8   4   19.70   48.60
  -4   8  -4   52.69   21.50
   4   8   4   78.49   33.60
  -4   8  -4   79.49   31.60
   6  -8   4  151.88   58.59
  -6   8  -4  124.89   24.40
  -6   8  -4  115.89   35.20
   6   8   4  107.09   38.30
   8  -8   4   45.40   53.49
  -8   8  -4   30.60   29.10
  -8   8  -4   28.80   19.20
   8   8   4   21.00   36.80
  10  -8   4   -5.40   51.09
  10   8   4   46.40   42.70
 -10   8  -4  -38.80   27.60
 -10   8  -4  -12.80   18.70
  12  -8   4   22.50   51.49
 -12   8  -4   -2.20   34.30
  12   8   4   10.30   42.10
  14  -8   4   79.39   54.89
 -14   8  -4   23.50   38.90
  14   8   4    8.00   45.70
  16  -8   4   83.59   57.69
  16   8   4    0.80   47.60
 -16   8  -4   25.70   41.70
  18  -8   4  134.89   57.39
  18   8   4 -125.49   45.00
 -18   8  -4   25.10   42.40
  20  -8   4  177.48   61.39
 -20   8  -4   46.70   47.70
  20   8   4  -57.69   50.99
  23  -9  -4  123.79   56.19
 -23   9   4    5.80   44.20
 -21  -9   4    0.60   52.69
  21  -9  -4  128.39   54.39
  21   9  -4 -112.09   41.00
 -21   9   4   -4.20   42.60
  19  -9  -4  120.89   54.89
 -19  -9   4  -30.50   48.60
  19   9  -4  -81.49   39.40
 -19   9   4   35.70   41.10
 -17  -9   4  -95.69   44.20
  17  -9  -4  120.89   52.99
 -17   9   4   23.30   38.50
  17   9  -4  -37.10   38.40
  15  -9  -4   -0.40   47.90
 -15   9   4    4.10   34.40
  15   9  -4  -48.00   33.60
  13  -9  -4   61.09   51.19
 -13  -9   4  -33.90   45.90
  13   9  -4  -68.89   29.60
 -13   9   4   29.60   33.80
 -11  -9   4   18.80   51.09
  11  -9  -4   20.70   48.80
  11   9  -4   33.70   30.30
 -11   9   4  -30.60   27.40
   9  -9  -4  -32.80   44.40
  -9  -9   4   49.99   51.99
  -9   9   4  -42.30   24.10
  -9   9   4  -29.80   29.10
   9   9  -4   -9.20   26.50
   7  -9  -4   74.79   49.40
  -7  -9   4   81.79   53.69
   7   9  -4   81.99   28.50
  -7   9   4   69.59   27.70
  -7   9   4   57.59   33.30
   5  -9  -4  -35.90   48.10
  -5  -9   4   13.30   52.89
   5   9  -4   38.80   24.90
  -5   9   4    6.70   27.20
  -5   9   4   25.70   30.20
  -3  -9   4   -8.20   54.09
   3  -9  -4    0.30   48.50
  -3   9   4   -8.90   26.30
  -3   9   4    8.60   28.50
   3   9  -4   11.10   20.80
   1  -9  -4   47.10   48.60
  -1  -9   4   72.39   56.69
  -1   9   4   18.70   29.20
   1   9  -4   -1.70   22.80
  -1  -9  -4    4.30   47.00
   1  -9   4   18.60   55.59
   1   9   4   29.20   31.60
  -1   9  -4   -1.40   21.20
   3  -9   4   45.90   55.29
  -3   9  -4   65.69   24.40
   3   9   4  -10.70   30.90
   5  -9   4    7.40   57.59
  -5   9  -4   13.10   31.90
   5   9   4   11.00   34.70
  -5   9  -4  -16.20   20.90
   7  -9   4   -0.50   56.99
   7   9   4    7.80   35.70
  -7   9  -4   40.50   32.80
  -7   9  -4  -13.00   21.00
   9  -9   4   19.00   56.39
   9   9   4  -21.70   36.20
  -9   9  -4    1.00   19.80
  -9   9  -4   36.80   33.10
  11  -9   4  -28.80   51.39
 -11   9  -4   14.30   34.60
  11   9   4  -13.60   39.50
  13  -9   4  127.39   61.29
 -13   9  -4   43.80   39.50
  13   9   4   23.30   46.30
  15  -9   4   74.29   59.69
 -15   9  -4   45.70   43.10
  15   9   4  -68.69   47.40
  17  -9   4  141.29   64.49
 -17   9  -4   68.29   51.89
  17   9   4  -78.69   47.70
 -19   9  -4   53.59   50.39
  19   9   4  -44.10   52.89
 -22  10   4   92.39   52.79
 -20 -10   4    4.20   60.79
  20 -10  -4  284.47   65.49
 -20  10   4   64.89   49.70
  20  10  -4  -50.79   46.90
 -18 -10   4   29.00   54.19
  18 -10  -4  162.08   59.09
  18  10  -4  -64.19   41.60
 -18  10   4  112.79   50.29
 -16 -10   4  -31.40   51.69
  16 -10  -4   52.69   52.69
 -16  10   4   29.20   38.70
  16  10  -4  -27.20   38.20
 -14 -10   4  -56.49   51.69
  14 -10  -4   50.69   49.20
  14  10  -4  -41.20   32.80
 -14  10   4   12.10   35.90
  12 -10  -4   19.30   47.30
 -12 -10   4 -130.29   47.60
  12  10  -4  -33.40   31.60
 -12  10   4    4.10   34.90
  10 -10  -4  155.28   55.79
 -10 -10   4  144.99   60.59
 -10  10   4  175.38   42.40
  10  10  -4  129.09   35.60
   8 -10  -4   65.59   54.29
  -8 -10   4  -25.80   55.69
   8  10  -4   -6.80   27.70
  -8  10   4    4.50   35.70
  -8  10   4   33.90   30.00
  -6 -10   4  458.75   74.49
   6 -10  -4  674.63   87.59
  -6  10   4  578.24   58.19
  -6  10   4  632.34   50.89
   6  10  -4  569.54   54.59
  -4 -10   4   -3.50   62.09
   4 -10  -4   50.39   60.39
   4  10  -4   37.50   26.80
  -4  10   4   41.50   32.60
  -4  10   4   51.19   37.50
   2 -10  -4  -67.69   55.19
  -2 -10   4   12.00   62.99
   2  10  -4  -24.40   25.20
  -2  10   4  -21.30   32.20
   0 -10  -4   40.80   55.99
   0 -10   4  111.29   67.09
   0  10  -4   84.69   28.50
   0  10   4   51.89   35.50
   2 -10   4  152.98   68.69
  -2  10  -4  142.19   29.90
   2  10   4  148.99   40.50
   4 -10   4  126.19   65.09
  -4  10  -4  118.19   39.00
   4  10   4  137.69   40.60
  -4  10  -4  168.78   31.70
   6 -10   4  151.08   65.89
  -6  10  -4   66.39   26.10
  -6  10  -4   99.09   38.70
   6  10   4   74.59   37.70
   8 -10   4   76.09   60.69
   8  10   4   20.30   37.70
  -8  10  -4   11.30   31.50
  -8  10  -4  -21.40   21.40
  10 -10   4   25.60   57.49
  10  10   4   -3.00   42.30
 -10  10  -4   11.30   35.80
  12 -10   4  111.89   62.79
 -12  10  -4   95.69   42.90
  12  10   4   75.69   46.80
  14 -10   4   63.49   64.19
 -14  10  -4   86.29   47.90
  14  10   4  -15.60   46.10
  16 -10   4  121.79   68.09
 -16  10  -4   53.29   51.59
  16  10   4  -58.09   47.80
  19 -11  -4  207.68   62.09
  19  11  -4 -125.99   43.00
 -19  11   4   42.40   45.70
  17 -11  -4  135.39   59.49
 -17 -11   4 -127.59   53.69
  17  11  -4  -81.99   41.40
 -17  11   4   27.80   43.10
  15 -11  -4   57.29   54.69
 -15  11   4    6.40   39.80
  15  11  -4  -71.09   38.30
  13 -11  -4   67.09   55.09
  13  11  -4  -34.00   38.30
 -13  11   4    8.30   38.50
 -11 -11   4  -13.70   57.59
  11 -11  -4  114.29   56.99
 -11  11   4   46.30   41.60
  11  11  -4   12.60   33.70
   9 -11  -4   75.99   53.99
  -9 -11   4  -18.70   58.09
   9  11  -4   -6.70   33.00
  -9  11   4   39.00   39.40
   7 -11  -4  217.78   61.89
  -7 -11   4   88.49   61.99
  -7  11   4   92.69   34.80
  -7  11   4  172.48   46.30
   7  11  -4   72.89   36.40
  -5 -11   4   13.90   63.69
   5 -11  -4  101.99   58.99
  -5  11   4   24.20   40.60
  -5  11   4   34.80   34.50
   5  11  -4   45.00   31.00
  -3 -11   4  -45.80   62.39
   3 -11  -4  -58.59   54.29
   3  11  -4  -29.40   27.00
  -3  11   4   -4.90   34.70
  -1 -11   4   26.50   63.29
   1  11  -4   -5.70   27.20
  -1  11   4   -7.40   35.60
   1 -11   4   79.69   66.29
   1  11   4   21.70   37.20
  -1  11  -4   66.29   30.10
   3 -11   4   98.19   66.89
   3  11   4   96.79   39.70
  -3  11  -4   70.69   29.10
   5 -11   4   89.79   64.99
   5  11   4   74.49   42.00
  -5  11  -4  117.29   32.20
   7 -11   4   35.80   59.09
   7  11   4  -53.39   35.30
  -7  11  -4   10.10   26.20
  -7  11  -4  -27.50   36.40
   9 -11   4    6.00   62.19
   9  11   4   36.50   43.80
  -9  11  -4   27.30   41.10
  11 -11   4   12.10   64.29
 -11  11  -4   28.40   39.10
  11  11   4  -28.30   43.90
  13 -11   4  136.69   73.19
 -13  11  -4   66.99   50.89
  13  11   4   12.00   51.19
  15 -11   4   43.50   66.89
  15  11   4  -30.90   52.19
 -15  11  -4   59.79   50.79
  18  12  -4 -119.49   45.90
 -18  12   4   90.99   50.39
 -16 -12   4 -123.89   63.89
  16 -12  -4  113.79   61.79
  16  12  -4 -132.29   42.30
 -16  12   4   64.99   52.49
  14 -12  -4  100.09   59.39
 -14 -12   4 -101.79   60.09
 -14  12   4   79.79   48.90
  14  12  -4  -80.49   41.60
 -12 -12   4  -72.39   64.09
  12 -12  -4  122.09   61.09
 -12  12   4   -2.90   43.20
  12  12  -4  -65.99   38.10
 -10 -12   4 -152.38   57.79
  10 -12  -4   57.79   56.79
 -10  12   4   54.79   43.10
  10  12  -4  -66.39   33.50
  -8 -12   4 -100.69   62.49
   8 -12  -4   88.19   59.59
  -8  12   4   51.09   42.80
   8  12  -4  -71.89   31.40
  -6 -12   4   23.70   68.89
   6 -12  -4   47.60   58.79
   6  12  -4  -32.70   29.50
  -6  12   4  -59.29   34.30
  -6  12   4    6.00   42.00
  -4 -12   4  -21.50   64.69
   4 -12  -4   77.49   61.69
   4  12  -4  -66.99   27.10
  -4  12   4  -73.89   33.50
  -2 -12   4   86.69   69.79
   2  12  -4  -15.40   29.80
  -2  12   4  -65.69   34.90
   0 -12   4   47.30   66.89
   0  12   4  -51.69   35.60
   0  12  -4  -46.50   26.60
   2 -12   4  -68.19   62.09
  -2  12  -4    1.60   28.80
   2  12   4  -47.80   37.60
   4 -12   4   -4.50   66.29
   4  12   4  -40.20   39.40
  -4  12  -4  -30.30   27.30
   6 -12   4   96.09   67.39
   6  12   4  -23.90   40.30
  -6  12  -4  -16.80   25.80
   8 -12   4   55.59   66.79
  -8  12  -4  -14.80   43.80
   8  12   4  -40.70   43.70
  10 -12   4   90.59   71.89
 -10  12  -4  -16.90   44.40
  10  12   4  -78.19   42.40
  12 -12   4  180.88   78.89
  12  12   4  -91.39   47.30
 -12  12  -4    4.20   49.50
  15 -13  -4  154.68   67.79
 -15  13   4   86.69   53.19
 -13 -13   4 -131.19   65.49
  13 -13  -4  175.68   66.89
 -13  13   4  -14.70   48.50
  13  13  -4  -72.29   45.40
  11 -13  -4  170.98   68.19
 -11 -13   4 -111.69   66.29
  11  13  -4  -48.90   41.10
 -11  13   4   75.99   51.89
   9 -13  -4  109.59   65.99
   9  13  -4  -18.50   38.10
  -9  13   4  -23.90   46.00
   7 -13  -4  162.18   64.79
  -7 -13   4  -36.90   70.89
   7  13  -4    3.70   33.70
  -7  13   4   -9.60   47.10
  -5 -13   4 -136.79   69.29
   5  13  -4  -36.40   32.50
  -5  13   4  -71.99   37.90
  -3 -13   4  -80.29   69.29
  -3  13   4 -114.89   38.40
   3  13  -4  -45.20   30.90
  -1 -13   4  -86.39   71.09
  -1  13   4  -58.89   38.80
   1  13  -4  -22.30   31.10
   1 -13   4   21.00   69.99
   1  13   4  -58.69   40.10
  -1  13  -4   17.80   32.90
   3 -13   4  -25.20   71.89
  -3  13  -4    7.10   31.80
   3  13   4  -85.89   40.40
   5 -13   4  -68.19   66.39
  -5  13  -4   -3.30   31.00
   5  13   4   13.60   45.50
   7 -13   4   89.49   72.09
   7  13   4  -79.39   43.80
   9 -13   4   61.69   70.19
  -9  13  -4  -76.09   46.80
   9  13   4  -96.39   45.90
 -11  13  -4  -55.49   49.90
  11  13   4  -58.89   50.99
  10 -14  -4   58.99   67.89
 -10 -14   4 -190.78   68.99
 -10  14   4  -41.80   52.09
  10  14  -4  -30.80   41.60
  -8 -14   4 -113.79   76.39
  -8  14   4  -89.79   50.39
   8  14  -4  -31.40   38.20
  -6 -14   4  -70.49   72.59
   6  14  -4   -2.30   39.50
   4  14  -4  -42.70   36.40
  -2 -14   4 -130.79   73.29
   2  14  -4   -8.30   35.60
   0 -14   4 -117.39   75.19
   0  14  -4  -16.60   34.70
   2 -14   4    2.00   75.59
  -2  14  -4  -24.30   31.70
   2  14   4  -16.80   46.30
   4 -14   4   53.09   78.89
  -4  14  -4  -22.90   36.40
   4  14   4  -24.00   46.60
   6 -14   4   41.50   77.69
   6  14   4  -36.30   48.40
   3  15  -4  -68.59   35.50
  -3  15   4  -69.49   48.10
   1  15  -4  -25.80   39.50
 -28   0   5  -18.90   35.60
 -28   0   5  -24.30   45.00
 -26   0   5   13.10   43.30
 -26   0   5   20.30   31.60
 -24   0   5  -18.50   37.10
 -24   0   5  -23.40   26.90
 -22   0   5   -1.10   25.10
 -22   0   5   10.10   34.70
 -20   0   5  -26.50   28.00
 -18   0   5   -3.20   23.80
 -16   0   5    7.30   22.30
 -14   0   5    7.90   20.60
 -14   0   5  -16.90   13.70
 -12   0   5   14.70   13.10
 -12   0   5    7.40   17.30
 -10   0   5   34.50   12.90
 -10   0   5   31.90   17.10
  -8   0   5   12.10   13.90
   6   0  -5   -1.30    6.70
  -6   0   5   10.40   12.20
  -4   0   5   16.70   11.80
   4   0  -5    7.90    7.90
  -2   0   5   69.99   13.60
   2   0  -5   13.20    9.00
   0   0  -5    6.40    8.60
   0   0   5    5.30    9.70
   2   0   5   -4.00   10.10
  -2   0  -5    7.50    9.50
  -4   0  -5   11.60   11.10
   4   0   5   -0.10   11.10
  -6   0  -5   12.00   13.50
  -6   0  -5    4.30   10.90
   6   0   5    8.40   14.20
  -8   0  -5   16.50   15.10
  -8   0  -5   19.40   13.10
   8   0   5   32.80   16.90
 -10   0  -5   14.20   15.60
  10   0   5   19.80   18.30
 -10   0  -5   24.20   17.10
 -12   0  -5  -19.00   16.20
  12   0   5    0.30   22.60
 -12   0  -5   36.10   21.50
  14   0   5   -5.00   25.40
 -14   0  -5   -1.00   21.20
 -16   0  -5  -14.00   22.60
  16   0   5  -22.50   25.90
 -27  -1   5   -2.90   46.40
 -27   1   5  -14.80   46.10
 -27   1   5  -37.40   31.80
 -25  -1   5   68.49   45.70
 -25   1   5   89.29   43.70
 -25   1   5   51.59   32.60
 -23  -1   5   46.20   38.80
 -23   1   5   24.60   28.10
 -23   1   5   52.19   37.30
 -21  -1   5   10.80   32.30
 -21   1   5   48.50   34.90
 -21   1   5   22.70   25.20
 -19  -1   5   -9.80   27.20
 -19   1   5  -14.30   21.10
 -19   1   5   23.00   28.30
 -17  -1   5   93.49   29.80
 -17   1   5   40.60   26.20
 -17   1   5   36.10   21.40
 -15  -1   5 1398.46   63.99
 -15   1   5 1414.56   48.70
 -15   1   5 1431.46   65.79
 -13  -1   5 1074.29   53.29
 -13   1   5 1099.29   55.49
 -13   1   5 1101.09   40.90
 -11  -1   5 2023.40   63.49
 -11   1   5 2098.19   47.80
 -11   1   5 2095.69   65.39
  11   1  -5 2043.80   35.90
  -9  -1   5  264.97   30.70
   9   1  -5  246.28   17.50
  -9   1   5  305.67   30.70
  -7  -1   5  341.17   17.90
  -7  -1   5  348.07   29.70
   7   1  -5  333.27   18.70
  -7   1   5  376.96   28.60
  -5  -1   5 1006.50   37.40
   5  -1  -5  954.70   25.60
   5   1  -5  934.41   26.20
  -5   1   5  939.01   26.50
  -5   1   5  933.21   32.60
   3  -1  -5 1882.11   38.40
  -3  -1   5 1906.91   45.30
  -3   1   5 1901.71   39.90
   3   1  -5 1892.31   36.80
   1  -1  -5 1206.68   34.70
  -1  -1   5 1188.98   38.30
   1   1  -5 1164.68   31.50
  -1   1   5 1163.98   36.20
   1  -1   5  844.82   34.40
  -1  -1  -5  815.42   32.20
  -1   1  -5  854.31   29.60
   1   1   5  834.22   33.60
   3  -1   5  419.86   25.20
   3  -1   5  406.26   30.40
  -3  -1  -5  441.66   28.60
  -3   1  -5  440.26   24.80
  -3   1  -5  429.26   25.10
   3   1   5  401.96   28.60
   5  -1   5  438.66   28.60
   5  -1   5  389.76   31.60
  -5  -1  -5  421.76   30.20
  -5   1  -5  366.76   26.20
   5   1   5  380.06   31.60
  -5   1  -5  393.46   27.20
   7  -1   5  877.01   44.70
  -7  -1  -5  958.10   43.50
   7  -1   5  854.51   39.60
  -7   1  -5  914.71   38.90
   7   1   5  894.41   43.60
  -7   1  -5  895.61   40.50
   9  -1   5  455.95   35.20
   9  -1   5  483.15   42.00
  -9  -1  -5  497.25   37.50
  -9   1  -5  491.55   35.70
  -9   1  -5  488.55   34.70
   9   1   5  482.55   39.20
  11  -1   5  824.92   47.10
  11   1   5  827.72   49.60
 -11   1  -5  883.91   46.60
 -11   1  -5  852.41   48.90
 -13  -1  -5  180.48   30.20
  13  -1   5  245.58   33.50
 -13   1  -5  223.78   31.80
 -13   1  -5  198.58   34.10
  13   1   5  238.88   35.70
 -15  -1  -5  -16.70   21.00
  15  -1   5    5.10   25.60
  15   1   5   27.80   30.70
 -15   1  -5   -4.60   23.20
 -15   1  -5    8.40   22.60
  17   1   5    2.40   29.80
 -17   1  -5   48.90   30.10
 -19   1  -5   47.00   35.50
 -28  -2   5   -6.00   46.60
 -28   2   5  -43.80   36.60
 -28   2   5  -20.00   47.00
 -26  -2   5  -19.30   43.30
 -26   2   5   12.50   46.40
 -26   2   5   22.20   32.80
 -24  -2   5   53.39   43.00
 -24   2   5   52.79   31.80
 -24   2   5   42.30   43.40
 -22  -2   5   57.49   38.40
 -22   2   5   66.89   37.60
 -22   2   5   58.99   28.70
 -20  -2   5   16.60   30.90
 -20   2   5   20.50   29.50
 -20   2   5    6.20   23.70
 -18  -2   5   77.49   31.90
 -18   2   5   86.99   32.40
 -18   2   5   32.20   22.20
 -16  -2   5  669.23   52.19
 -16   2   5  640.44   40.60
  16   2  -5  676.63   32.90
 -16   2   5  670.83   52.89
 -14  -2   5 1752.32   68.39
  14   2  -5 1800.72   42.60
 -14   2   5 1884.91   73.19
 -12  -2   5 3810.12   88.59
  12   2  -5 3854.51   55.69
 -12   2   5 3932.01   94.29
 -10  -2   5 1157.38   51.39
 -10   2   5 1219.28   52.79
  10   2  -5 1162.68   32.60
  -8  -2   5 2223.78   61.09
   8   2  -5 2218.48   41.10
  -8   2   5 2195.78   59.99
  -6  -2   5  305.07   31.50
   6   2  -5  279.47   20.70
  -6   2   5  252.57   25.50
  -4  -2   5  476.85   34.70
   4  -2  -5  450.35   22.80
  -4   2   5  462.45   24.60
  -4   2   5  431.56   24.50
   4   2  -5  445.36   22.80
  -2  -2   5 1191.58   44.20
   2  -2  -5 1177.78   35.50
   2   2  -5 1183.88   32.80
  -2   2   5 1130.49   36.30
   0  -2  -5 1686.63   44.70
   0  -2   5 1736.03   49.60
   0   2   5 1686.03   45.10
   0   2  -5 1768.62   40.20
  -2  -2  -5   63.19   15.30
   2  -2   5   55.59   20.10
  -2   2  -5   68.09   15.80
  -2   2  -5   58.99   12.70
   2   2   5   45.80   15.50
  -4  -2  -5  633.04   35.20
   4  -2   5  631.54   38.90
  -4   2  -5  671.73   30.90
  -4   2  -5  637.74   33.30
   4   2   5  630.84   36.90
   6  -2   5  822.02   36.80
   6  -2   5  804.62   45.50
  -6   2  -5  867.41   41.50
  -6   2  -5  887.01   36.80
   6   2   5  842.62   43.30
   8  -2   5 1683.93   51.69
   8  -2   5 1594.94   62.39
  -8   2  -5 1626.04   50.99
   8   2   5 1631.24   56.69
  -8   2  -5 1663.63   58.79
  10  -2   5 1301.07   52.09
  10  -2   5 1413.36   64.39
 -10   2  -5 1381.36   59.99
  10   2   5 1381.66   57.19
 -10   2  -5 1411.26   52.29
  12  -2   5  837.42   48.10
  12  -2   5  845.42   62.29
  12   2   5  872.31   54.89
 -12   2  -5  856.71   47.20
 -12   2  -5  824.32   52.89
  14  -2   5   89.89   27.00
  14   2   5   84.69   34.60
 -14   2  -5   92.59   24.80
 -14   2  -5  110.09   30.20
  16  -2   5   48.60   28.70
 -16   2  -5   63.69   30.70
  16   2   5   22.00   32.70
 -18   2  -5   75.39   33.30
  18   2   5   30.10   35.00
 -20   2  -5   79.89   36.50
 -27  -3   5   42.00   49.99
 -27   3   5    4.90   48.80
 -25  -3   5   50.09   44.80
 -25   3   5  -46.80   38.10
 -25   3   5  -24.20   33.90
 -23  -3   5  -17.30   37.50
 -23   3   5   32.10   37.40
 -23   3   5  -27.10   28.10
 -21  -3   5   -6.50   32.30
 -21   3   5    9.40   26.40
 -21   3   5  -40.60   26.80
 -19  -3   5   51.39   31.80
 -19   3   5   51.29   31.80
 -17  -3   5  143.29   35.20
 -17   3   5  141.79   35.90
  17   3  -5  138.89   24.60
 -15  -3   5  473.65   47.70
  15   3  -5  518.55   34.10
 -15   3   5  520.95   49.20
 -13  -3   5  783.12   52.89
 -13   3   5  896.41   54.99
  13   3  -5  879.91   36.70
 -11  -3   5 1308.57   58.59
  11   3  -5 1293.57   39.80
 -11   3   5 1315.17   58.69
  -9  -3   5  401.56   39.30
  -9   3   5  377.56   36.30
   9   3  -5  387.86   25.90
  -7  -3   5  968.80   47.90
  -7   3   5 1017.40   43.10
   7   3  -5 1021.40   33.30
  -5  -3   5   72.69   23.80
  -5   3   5   50.49   13.20
  -5   3   5   70.09   16.70
   5   3  -5   70.99   13.70
  -3  -3   5   79.19   23.80
  -3   3   5   90.79   16.20
   3   3  -5   85.09   14.10
  -1  -3   5   63.89   23.40
   1   3  -5   72.79   13.90
  -1   3   5   73.89   17.20
   1  -3   5   52.19   22.50
   1   3   5   65.39   17.70
  -1   3  -5   68.89   17.20
  -1   3  -5   52.99   12.90
   3  -3   5  283.57   33.20
   3   3   5  294.67   29.90
  -3   3  -5  291.57   24.90
  -3   3  -5  257.67   28.60
   5  -3   5  984.00   53.39
  -5   3  -5  966.40   45.10
  -5   3  -5  981.10   39.10
   5   3   5  990.10   46.30
   7  -3   5  741.13   51.49
  -7   3  -5  776.42   37.30
   7   3   5  785.72   45.60
  -7   3  -5  841.22   47.20
   9  -3   5  822.92   58.89
   9  -3   5  842.42   43.30
   9   3   5  917.81   51.79
  -9   3  -5  812.92   41.30
  -9   3  -5  815.62   49.60
  11  -3   5  616.44   60.79
  11  -3   5  604.04   43.50
  11   3   5  558.84   51.49
 -11   3  -5  623.54   49.80
 -11   3  -5  614.94   41.10
  13  -3   5  107.49   27.60
  13  -3   5  105.09   38.90
 -13   3  -5   88.79   30.10
 -13   3  -5   70.69   22.80
  13   3   5  124.29   36.40
  15  -3   5   38.90   39.10
  15  -3   5   42.90   25.00
  15   3   5   11.30   34.80
 -15   3  -5   57.09   31.20
 -15   3  -5   54.79   29.30
  17  -3   5   78.09   40.00
 -17   3  -5   -4.60   29.10
  17   3   5    5.20   36.10
  19  -3   5   40.40   41.70
 -19   3  -5    6.50   33.60
  19   3   5    1.20   39.40
  21  -3   5   98.89   46.80
 -21   3  -5   18.20   36.90
 -26  -4   5   93.49   51.39
 -26   4   5   90.19   54.79
 -24  -4   5  139.29   52.79
 -24   4   5  146.59   50.59
 -22  -4   5  266.37   53.49
 -22   4   5  164.38   45.20
 -20  -4   5   70.89   39.00
 -20   4   5   61.99   35.50
 -18  -4   5   63.19   34.20
 -18   4   5   79.99   33.30
  18   4  -5   74.59   27.60
 -16  -4   5   -5.30   25.60
 -16   4   5   24.10   28.00
  16   4  -5   20.20   22.00
 -14  -4   5   21.50   27.20
  14   4  -5   20.70   18.70
 -14   4   5   27.50   25.00
 -12  -4   5   33.60   26.70
 -12   4   5    9.30   21.60
  12   4  -5   24.70   16.70
 -10  -4   5   -6.10   22.80
  10   4  -5   -5.80   14.00
 -10   4   5   32.50   21.80
  -8  -4   5 1557.04   61.59
   8   4  -5 1593.54   45.20
  -8   4   5 1606.44   56.79
  -6  -4   5 1504.55   59.59
   6   4  -5 1529.75   43.20
  -6   4   5 1424.16   47.90
  -6   4   5 1494.05   36.40
  -4  -4   5 1333.67   56.89
  -4   4   5 1336.97   38.90
   4   4  -5 1377.36   40.70
  -4   4   5 1318.97   39.10
  -2  -4   5 1194.68   54.09
  -2   4   5 1213.48   40.80
   2   4  -5 1277.47   39.40
   0  -4   5 1206.98   56.39
   0   4  -5 1283.87   40.00
   0   4   5 1167.28   44.00
   2  -4   5 1152.68   57.59
  -2   4  -5 1131.19   47.60
   2   4   5 1196.28   47.00
  -2   4  -5 1137.99   39.30
   4  -4   5  242.08   37.50
  -4   4  -5  231.98   30.50
   4   4   5  187.28   27.80
  -4   4  -5  186.88   21.30
   6  -4   5  163.08   36.60
  -6   4  -5  130.49   27.60
   6   4   5  106.49   24.60
  -6   4  -5  165.58   18.90
  -6   4  -5   95.39   18.20
   8  -4   5   27.00   30.60
  -8   4  -5    2.50   18.90
   8   4   5   49.90   24.10
  -8   4  -5   -9.10   14.40
  10  -4   5   38.30   20.80
  10  -4   5   24.50   34.20
 -10   4  -5   36.90   18.90
 -10   4  -5   37.20   23.30
  10   4   5   16.90   28.50
  12  -4   5  121.79   44.00
  12  -4   5  112.59   26.10
  12   4   5  133.19   39.40
 -12   4  -5   68.09   22.30
 -12   4  -5   94.89   30.00
  14  -4   5   45.50   25.30
  14  -4   5   43.70   43.60
 -14   4  -5   -4.60   27.10
 -14   4  -5   17.50   22.40
  14   4   5  -23.00   34.90
  16  -4   5   95.59   43.60
  16   4   5    3.30   39.90
 -16   4  -5    6.20   30.60
  18  -4   5  152.38   49.99
 -18   4  -5  141.09   43.80
  18   4   5  129.89   47.20
  20  -4   5  292.37   58.09
 -20   4  -5  147.69   43.10
  20   4   5  125.39   50.59
 -20   4  -5  194.68   51.49
  22  -4   5  181.28   51.39
 -22   4  -5   59.89   44.30
 -22   4  -5   55.49   43.60
 -27  -5   5   73.59   53.89
 -27   5   5   67.59   50.19
 -25  -5   5  202.58   59.59
 -25   5   5  262.67   60.49
 -23  -5   5  295.17   61.19
 -23   5   5  354.66   59.69
 -21  -5   5  423.56   60.89
 -21   5   5  323.67   56.69
 -19  -5   5   70.59   39.30
  19   5  -5   56.19   31.30
 -19   5   5   70.49   38.10
 -17  -5   5   -3.90   31.60
  17   5  -5   16.20   26.20
 -17   5   5   -5.20   28.50
 -15  -5   5   62.19   32.50
  15   5  -5   59.99   24.80
 -15   5   5   17.20   28.80
 -13  -5   5  410.56   50.39
 -13   5   5  368.46   46.00
  13   5  -5  381.86   36.80
 -11  -5   5  197.58   36.70
  11   5  -5  218.28   26.80
 -11   5   5  165.78   32.60
  -9  -5   5  430.96   49.50
  -9   5   5  390.06   39.60
   9   5  -5  428.76   33.80
  -7  -5   5  749.13   56.89
  -7   5   5  725.33   32.20
   7   5  -5  770.72   37.40
  -7   5   5  731.43   41.90
  -5  -5   5 1398.06   65.89
  -5   5   5 1318.77   41.10
  -5   5   5 1284.27   44.70
   5   5  -5 1330.57   44.20
  -3  -5   5 4258.27   93.99
  -3   5   5 4275.27   69.09
   3   5  -5 4293.37   71.39
  -1  -5   5  900.61   59.69
   1   5  -5  913.01   38.20
  -1   5   5  919.31   43.70
   1  -5   5 2851.31   83.39
   1   5   5 2762.72   66.79
  -1   5  -5 2818.72   59.99
   3  -5   5 1042.80   65.49
  -3   5  -5 1040.80   52.29
   3   5   5 1003.20   50.39
  -3   5  -5  995.70   39.40
   5  -5   5  165.88   41.00
   5   5   5  139.29   29.50
  -5   5  -5  132.19   20.50
  -5   5  -5  145.69   28.10
   7  -5   5   64.89   37.10
  -7   5  -5   24.00   21.10
  -7   5  -5    4.20   14.60
  -7   5  -5    9.80   14.70
   7   5   5    9.70   27.30
   9  -5   5   25.30   38.20
   9   5   5   35.90   30.90
  -9   5  -5   25.40   17.60
  -9   5  -5   17.90   23.60
  -9   5  -5   21.20   17.50
  11  -5   5  -48.80   39.10
 -11   5  -5  -20.50   17.70
  11   5   5    1.40   34.30
 -11   5  -5    6.20   27.40
 -11   5  -5    2.70   20.20
  13  -5   5  212.08   53.19
  13  -5   5  191.88   32.10
  13   5   5  234.78   47.60
 -13   5  -5  154.98   29.30
 -13   5  -5  194.38   33.00
 -13   5  -5  177.88   40.70
  15  -5   5   58.39   47.20
 -15   5  -5  134.99   39.50
 -15   5  -5  125.69   35.10
  15   5   5  129.09   43.90
  17  -5   5  190.28   55.49
 -17   5  -5  148.29   39.60
 -17   5  -5  130.99   42.60
  17   5   5  160.48   48.20
  19  -5   5  318.27   61.19
  19   5   5  301.67   56.59
 -19   5  -5  346.87   49.20
 -19   5  -5  358.36   60.79
  21  -5   5  281.77   59.69
 -21   5  -5  250.87   50.99
 -21   5  -5  254.97   57.59
 -26  -6   5   54.49   55.39
 -26   6   5  167.08   57.49
 -24  -6   5  118.49   54.69
 -24   6   5  142.79   54.49
 -22  -6   5  431.76   68.39
 -22   6   5  571.74   74.09
 -20  -6   5   39.10   44.10
  20   6  -5   50.39   36.00
 -20   6   5  103.19   42.70
 -18  -6   5  113.29   42.90
  18   6  -5   76.89   33.70
 -18   6   5   64.19   35.40
 -16  -6   5    8.70   35.60
  16   6  -5    4.80   26.80
 -16   6   5  -10.20   27.20
 -14  -6   5   31.30   33.50
  14   6  -5   22.10   24.60
 -14   6   5    0.60   28.40
 -12  -6   5  155.88   39.40
  12   6  -5  143.59   28.60
 -12   6   5  138.79   33.90
 -10  -6   5   32.70   34.70
  10   6  -5   52.79   22.30
 -10   6   5   20.70   25.40
  -8  -6   5  276.57   43.20
   8   6  -5  323.37   32.90
  -8   6   5  285.87   36.30
  -8   6   5  260.77   27.90
  -6  -6   5  468.95   57.09
   6  -6  -5  478.75   45.40
  -6   6   5  431.46   33.20
  -6   6   5  432.66   36.40
   6   6  -5  399.26   33.00
  -4  -6   5 1693.13   74.89
   4  -6  -5 1820.82   59.09
  -4   6   5 1852.91   52.09
   4   6  -5 1793.12   52.99
  -4   6   5 1762.62   51.79
  -2  -6   5 1654.03   74.39
   2   6  -5 1512.75   48.80
  -2   6   5 1646.04   52.79
   0  -6   5  761.32   65.19
   0   6   5  832.62   47.10
   0   6  -5  790.02   39.00
   2  -6   5  725.53   63.69
   2   6   5  772.32   48.90
  -2   6  -5  783.32   48.70
  -2   6  -5  810.22   39.40
   4  -6   5  262.67   49.10
   4   6   5  263.77   35.30
  -4   6  -5  323.17   41.30
  -4   6  -5  315.47   30.00
   6  -6   5    9.10   39.30
   6   6   5    5.40   28.40
  -6   6  -5   38.80   17.10
  -6   6  -5    3.10   21.30
   8  -6   5   25.90   43.20
  -8   6  -5  -23.50   23.70
   8   6   5  -23.10   30.90
  -8   6  -5   14.50   16.50
  10  -6   5  -38.00   44.60
 -10   6  -5   -9.10   28.30
 -10   6  -5    5.20   18.40
  10   6   5   -6.90   35.90
  12  -6   5  102.49   54.89
 -12   6  -5   35.30   33.40
 -12   6  -5   46.70   21.60
  12   6   5  119.29   45.60
  14  -6   5  106.99   51.59
 -14   6  -5   44.80   28.80
 -14   6  -5   18.10   33.70
  14   6   5   15.10   41.00
  16  -6   5  267.97   59.59
 -16   6  -5  174.28   39.20
  16   6   5  123.59   49.20
 -16   6  -5  207.28   49.10
  18  -6   5  255.37   62.49
 -18   6  -5  147.69   47.20
 -18   6  -5  124.09   41.50
  18   6   5  157.18   52.29
  20  -6   5  330.97   65.49
 -20   6  -5  164.18   51.29
  20   6   5  119.69   55.99
 -20   6  -5  139.19   46.30
 -25  -7   5  -64.49   49.50
 -25   7   5   64.79   48.90
 -23  -7   5    3.40   50.49
 -23   7   5   92.99   49.70
 -21  -7   5  -28.50   46.20
  21   7  -5   -7.70   37.30
 -21   7   5   39.20   40.60
 -19  -7   5  -42.40   40.20
  19   7  -5  -28.20   34.50
 -19   7   5   48.20   39.90
 -17  -7   5   57.29   43.10
 -17   7   5  105.79   41.20
  17   7  -5   47.90   33.80
 -15  -7   5   57.09   40.90
  15   7  -5   -4.40   28.40
 -15   7   5    8.30   31.60
 -13  -7   5  112.09   44.40
  13   7  -5   85.89   29.90
 -13   7   5   85.19   33.50
 -11  -7   5   33.50   38.30
  11   7  -5   47.80   25.40
 -11   7   5   -3.00   25.70
  -9  -7   5  362.66   51.99
   9  -7  -5  322.67   48.40
   9   7  -5  361.66   40.50
  -9   7   5  317.97   42.20
  -9   7   5  319.07   32.10
  -7  -7   5   99.29   40.80
   7  -7  -5  104.89   37.40
  -7   7   5   91.19   27.10
  -7   7   5   74.99   22.90
   7   7  -5   90.09   23.30
  -5  -7   5  167.08   45.80
   5  -7  -5  148.59   34.70
   5   7  -5   97.79   22.40
  -5   7   5  125.19   24.70
  -5   7   5  165.88   27.30
   3  -7  -5  121.09   36.00
  -3  -7   5  114.49   44.20
  -3   7   5  148.99   25.70
   3   7  -5  124.19   22.40
  -3   7   5  129.19   27.00
  -1  -7   5   37.20   42.80
  -1   7   5   67.39   27.00
   1   7  -5   30.40   17.00
   1  -7   5  201.98   48.40
  -1   7  -5  203.38   26.00
   1   7   5  225.88   35.20
   3  -7   5  -21.20   41.70
  -3   7  -5   27.40   26.00
   3   7   5   13.10   29.00
  -3   7  -5   11.40   18.00
   5  -7   5  189.68   55.49
  -5   7  -5  195.28   36.80
  -5   7  -5  208.88   26.20
   5   7   5  187.08   37.50
   7  -7   5   73.39   52.19
  -7   7  -5  145.99   37.00
  -7   7  -5  113.69   22.80
   7   7   5  151.98   39.70
   9  -7   5  -74.69   47.10
   9   7   5   28.10   37.40
  -9   7  -5    0.40   17.00
  -9   7  -5    8.00   33.00
  11  -7   5  207.88   61.19
 -11   7  -5  185.98   28.70
  11   7   5  143.89   45.40
 -11   7  -5  165.58   43.70
  13  -7   5   17.10   51.39
  13   7   5  -15.20   40.70
 -13   7  -5   -8.40   34.50
  15  -7   5  150.88   58.09
  15   7   5  136.49   49.70
 -15   7  -5  144.69   46.60
  17  -7   5  116.79   57.59
  17   7   5   36.70   50.59
 -17   7  -5   40.00   41.00
  19  -7   5  171.78   60.49
 -19   7  -5   63.99   44.80
  19   7   5    9.80   51.69
 -24  -8   5  -14.90   54.19
 -24   8   5   28.70   45.60
 -22  -8   5  -94.99   44.80
 -22   8   5    9.20   42.60
  22   8  -5 -105.69   49.30
 -20  -8   5  -48.70   45.60
  20   8  -5  -98.49   35.00
 -20   8   5   58.99   40.80
 -18  -8   5  -31.90   45.80
  18   8  -5   38.60   38.20
 -18   8   5   56.19   37.60
 -16  -8   5  179.58   54.69
  16   8  -5  194.58   42.10
 -16   8   5  210.58   46.20
 -14  -8   5  215.58   55.99
  14  -8  -5  320.27   62.89
 -14   8   5  240.18   45.00
  14   8  -5  280.77   42.80
 -12  -8   5  557.34   74.49
  12  -8  -5  283.57   57.69
 -12   8   5  432.56   54.89
  12   8  -5  371.26   42.70
  10  -8  -5  134.59   47.20
 -10  -8   5  197.28   52.49
  10   8  -5  168.38   32.20
 -10   8   5  151.68   37.00
   8  -8  -5  106.89   43.70
  -8  -8   5  169.48   52.59
   8   8  -5  124.49   27.10
  -8   8   5  139.79   32.10
  -8   8   5  125.49   26.80
  -6  -8   5   13.40   48.30
   6  -8  -5   45.20   39.00
  -6   8   5  -35.80   22.40
   6   8  -5   -3.80   19.60
  -6   8   5   -8.80   24.70
  -4  -8   5  105.69   50.39
   4  -8  -5   75.39   42.30
   4   8  -5   56.49   22.30
  -4   8   5   78.09   26.80
  -4   8   5  130.49   28.50
  -2  -8   5   71.89   48.70
   2  -8  -5   52.59   41.40
  -2   8   5   41.60   25.30
  -2   8   5  101.39   30.10
   2   8  -5   50.69   21.10
   0  -8   5  191.78   55.49
   0   8   5  255.97   38.30
   0   8  -5  217.28   27.90
   2  -8   5   46.70   49.99
  -2   8  -5  -20.50   18.30
   2   8   5   19.30   32.20
   4  -8   5   16.30   50.69
  -4   8  -5   29.90   30.10
  -4   8  -5  -10.70   20.20
   4   8   5   53.29   35.30
   6  -8   5  131.59   61.09
  -6   8  -5  161.08   40.00
   6   8   5  171.28   43.10
  -6   8  -5  139.29   26.20
   8  -8   5  128.99   63.49
  -8   8  -5  242.88   47.00
   8   8   5  180.58   44.40
  -8   8  -5  218.28   29.30
  10  -8   5  437.16   72.09
 -10   8  -5  530.15   44.00
  10   8   5  440.96   55.39
 -10   8  -5  468.35   61.09
  12  -8   5  150.58   59.39
 -12   8  -5  110.89   42.90
  12   8   5   53.09   45.10
  14  -8   5  124.19   59.69
  14   8   5  174.98   54.19
 -14   8  -5  107.29   45.70
  16  -8   5   59.79   59.49
  16   8   5  -54.59   46.70
 -16   8  -5   39.10   43.10
  18  -8   5  104.09   59.59
 -18   8  -5    0.70   42.80
 -23  -9   5   -3.60   57.09
  23  -9  -5  193.68   61.49
 -23   9   5   29.70   44.20
 -21  -9   5   -1.60   55.69
  21  -9  -5  156.58   59.19
 -21   9   5   48.90   43.50
  21   9  -5 -121.19   42.30
 -19  -9   5  -74.19   47.60
  19  -9  -5   63.59   53.99
  19   9  -5  -82.79   38.80
 -19   9   5   10.40   35.50
  17  -9  -5  135.39   54.59
 -17  -9   5  -23.00   49.90
  17   9  -5  -33.30   39.20
 -17   9   5   66.89   38.70
 -15  -9   5  120.69   56.69
  15  -9  -5  225.98   58.69
 -15   9   5  198.08   46.90
  15   9  -5  159.58   42.30
 -13  -9   5  134.59   55.09
  13  -9  -5  229.48   55.49
  13   9  -5  194.78   40.10
 -13   9   5  194.18   44.00
 -11  -9   5  168.88   59.69
  11  -9  -5  270.97   56.69
  11   9  -5  224.78   39.00
 -11   9   5  256.27   45.00
  -9  -9   5  174.68   59.99
   9  -9  -5  203.08   55.79
  -9   9   5  248.88   43.30
   9   9  -5  165.88   35.10
  -9   9   5  191.08   37.40
  -7  -9   5   30.60   52.79
   7  -9  -5  -17.50   46.10
  -7   9   5   30.10   32.10
   7   9  -5   25.70   25.40
  -7   9   5  -11.20   26.60
  -5  -9   5   39.90   54.19
   5  -9  -5    4.00   48.60
   5   9  -5   26.10   22.80
  -5   9   5   24.50   28.10
  -5   9   5   -0.60   29.20
   3  -9  -5  149.69   51.89
  -3  -9   5  127.59   58.89
   3   9  -5  151.58   29.80
  -3   9   5  132.49   33.40
  -3   9   5  181.98   34.60
   1  -9  -5  246.48   54.29
  -1  -9   5  285.37   63.89
   1   9  -5  221.78   31.20
  -1   9   5  253.67   38.10
   1  -9   5   38.80   57.39
   1   9   5   84.59   36.60
  -1   9  -5   38.30   23.30
   3  -9   5  -10.30   55.09
  -3   9  -5  -20.20   21.00
   3   9   5  -55.09   32.70
   5  -9   5   63.29   59.19
  -5   9  -5   42.60   34.10
   5   9   5   35.20   39.60
  -5   9  -5   22.40   22.90
   7  -9   5  120.59   63.89
  -7   9  -5  114.79   42.20
  -7   9  -5  125.09   27.40
   7   9   5   75.49   40.80
   9  -9   5  237.68   68.49
   9   9   5  234.08   49.99
  -9   9  -5  349.27   40.50
  -9   9  -5  328.27   54.69
  11  -9   5  145.29   60.99
  11   9   5   64.49   47.40
 -11   9  -5  166.38   46.60
  13  -9   5   87.49   62.49
  13   9   5   -7.50   47.10
 -13   9  -5  -15.30   37.00
  15  -9   5  110.29   62.99
 -15   9  -5   10.70   42.30
  15   9   5 -140.29   46.10
  17  -9   5  170.08   68.89
 -17   9  -5   63.19   49.50
  17   9   5  -70.29   50.69
 -22 -10   5  -26.20   60.79
  22  10  -5 -146.69   46.40
 -22  10   5   -9.10   49.30
  20 -10  -5  200.58   58.39
 -20 -10   5  -54.69   54.99
 -20  10   5   62.79   52.19
 -18 -10   5 -110.89   50.69
  18 -10  -5  100.39   54.99
  18  10  -5  -26.40   42.80
 -18  10   5   -9.60   43.20
  16 -10  -5   99.89   54.89
 -16 -10   5  -81.29   52.19
 -16  10   5   53.19   41.40
  16  10  -5  -64.09   37.20
 -14 -10   5 -108.39   52.19
  14 -10  -5  137.99   53.69
 -14  10   5   23.30   36.60
  14  10  -5  -73.59   33.70
 -12 -10   5  -31.90   55.69
  12 -10  -5  100.09   50.59
 -12  10   5   16.80   35.00
  12  10  -5    5.40   33.10
  10 -10  -5   21.10   47.90
 -10 -10   5   -5.70   54.69
 -10  10   5   17.60   36.80
  10  10  -5   20.50   30.30
   8 -10  -5   82.19   54.79
  -8 -10   5   14.60   57.39
  -8  10   5   79.79   37.50
   8  10  -5   94.39   32.80
  -8  10   5   47.00   30.50
   6 -10  -5   -3.90   55.09
  -6 -10   5   38.30   63.09
  -6  10   5   41.60   36.30
   6  10  -5   17.60   26.10
  -6  10   5    4.00   32.40
   4 -10  -5   99.29   58.89
  -4 -10   5  101.59   67.39
   4  10  -5   45.20   28.10
  -4  10   5   71.69   38.10
  -4  10   5   19.20   33.40
   2 -10  -5    5.70   71.19
  -2 -10   5   95.89   66.99
   2  10  -5   55.29   28.10
  -2  10   5   61.79   35.70
   0 -10   5    5.40   64.69
   0  10  -5   50.89   27.10
   0  10   5  -12.60   34.80
   2 -10   5   80.99   65.99
  -2  10  -5   12.80   24.40
   2  10   5   63.79   38.40
   4 -10   5   22.40   59.29
  -4  10  -5   -2.50   23.00
   4  10   5   12.10   37.10
   6 -10   5  -16.50   54.59
  -6  10  -5    2.60   23.40
  -6  10  -5   13.90   34.30
   6  10   5  -40.10   35.80
   8 -10   5   45.70   61.29
  -8  10  -5   59.59   39.80
  -8  10  -5   41.00   24.10
   8  10   5  -18.60   39.20
  10 -10   5   86.19   64.49
  10  10   5  -34.10   42.40
 -10  10  -5   79.89   43.90
  12 -10   5   91.89   67.59
 -12  10  -5   20.40   39.50
  12  10   5    8.30   47.30
  14 -10   5  107.49   66.59
 -14  10  -5   -9.00   43.30
  14  10   5   15.50   51.99
  16 -10   5   61.09   65.89
  16  10   5  -28.50   52.09
 -16  10  -5  -21.10   47.40
  19 -11  -5  167.88   62.29
 -19 -11   5  -56.09   58.29
 -19  11   5  -25.70   44.80
  19  11  -5 -125.09   45.60
  17 -11  -5  165.78   59.49
 -17 -11   5  -25.10   61.29
  17  11  -5  -53.39   42.80
 -17  11   5   46.10   44.30
 -15 -11   5  -53.99   58.69
  15 -11  -5   30.10   51.49
  15  11  -5  -48.00   40.00
 -15  11   5   78.39   44.90
 -13 -11   5  -62.49   57.69
  13 -11  -5  143.59   56.79
 -13  11   5   70.79   42.20
  13  11  -5  -22.00   37.60
  11 -11  -5  152.98   56.59
 -11 -11   5   -5.10   59.39
 -11  11   5   65.59   42.20
  11  11  -5   95.49   38.70
  -9 -11   5 -128.49   57.09
   9 -11  -5  122.79   55.39
   9  11  -5  -40.70   30.70
  -9  11   5   45.60   41.10
   7 -11  -5   80.29   56.09
  -7 -11   5  -49.10   59.79
   7  11  -5   -0.80   29.60
  -7  11   5   52.19   40.40
  -7  11   5  -42.20   31.40
  -5 -11   5  -21.90   63.59
   5 -11  -5  -12.10   54.29
   5  11  -5    5.20   29.30
  -5  11   5  -15.70   33.60
  -5  11   5  -42.70   37.30
  -3 -11   5  -59.79   62.69
  -3  11   5  -26.50   35.20
   3  11  -5  -45.60   25.80
  -1 -11   5    2.80   62.99
  -1  11   5  -20.80   34.70
   1  11  -5   -8.40   27.10
   1 -11   5  -84.09   61.39
   1  11   5   -8.20   36.10
  -1  11  -5  -16.20   26.00
   3 -11   5   46.90   66.89
  -3  11  -5  -11.20   26.60
   3  11   5  -52.19   34.70
   5 -11   5    9.10   63.09
  -5  11  -5  -16.00   24.90
   5  11   5    5.40   40.60
   7 -11   5   79.89   64.09
  -7  11  -5   -7.60   40.50
  -7  11  -5   49.50   25.60
   7  11   5  -21.50   41.50
   9 -11   5    0.30   64.39
   9  11   5  -28.50   42.60
  -9  11  -5   12.10   43.70
  11 -11   5  108.09   68.59
  11  11   5  -64.79   45.40
 -11  11  -5    3.30   44.80
  13 -11   5  123.89   71.99
 -13  11  -5    5.00   47.90
  13  11   5   -8.70   50.89
 -15  11  -5   56.29   56.89
 -18 -12   5 -140.49   61.89
 -18  12   5   -5.00   46.00
  18  12  -5 -102.79   48.10
  16 -12  -5  218.48   65.29
 -16 -12   5  -51.59   67.19
  16  12  -5  -77.59   44.90
 -16  12   5  134.69   52.59
  14 -12  -5  186.78   64.39
 -14 -12   5  -26.20   64.89
 -14  12   5   84.09   50.59
  14  12  -5   37.60   46.40
  12 -12  -5  329.07   66.89
 -12  12   5  214.78   55.49
  12  12  -5   45.00   42.20
  10 -12  -5  175.48   61.69
 -10 -12   5 -106.89   60.49
 -10  12   5  116.79   45.40
  10  12  -5   50.59   38.10
   8 -12  -5  138.39   62.09
  -8 -12   5 -128.69   61.89
  -8  12   5   53.49   41.80
   8  12  -5  -19.40   30.10
  -6 -12   5  -57.69   63.49
   6  12  -5  -39.50   30.90
  -6  12   5  -47.60   40.50
  -6  12   5  -66.09   34.80
  -4 -12   5   36.10   69.19
   4  12  -5  -41.90   29.40
  -4  12   5  -22.80   36.60
  -2 -12   5  -29.80   66.79
   2  12  -5   -4.10   29.80
  -2  12   5  -46.20   36.70
   0 -12   5  -30.30   64.69
   0  12   5  -42.30   38.10
   0  12  -5   61.29   33.60
   2 -12   5  -46.30   67.69
   2  12   5  -51.49   36.90
  -2  12  -5    4.00   28.80
   4 -12   5   39.50   70.79
  -4  12  -5   -9.10   27.90
   4  12   5  -43.90   41.00
   6 -12   5   19.50   68.29
   6  12   5  -21.70   42.60
  -6  12  -5   11.50   28.80
   8 -12   5   63.59   69.79
  -8  12  -5  -43.40   42.60
   8  12   5    7.40   47.50
  10 -12   5  158.98   75.19
  10  12   5    0.70   49.99
 -10  12  -5   25.40   50.79
  12 -12   5  204.38   81.19
 -12  12  -5   -0.90   50.49
  12  12   5  -97.49   49.00
  15 -13  -5  234.48   67.99
 -15 -13   5  -81.99   70.89
  15  13  -5  -78.19   46.30
 -15  13   5   73.19   56.59
  13 -13  -5  188.88   66.59
 -13 -13   5 -107.19   66.39
 -13  13   5   52.49   51.99
  13  13  -5  -13.20   45.90
  11 -13  -5  171.08   68.39
 -11 -13   5 -120.49   66.39
 -11  13   5   79.89   51.99
  11  13  -5    9.90   41.50
  -9 -13   5 -103.89   67.09
   9 -13  -5  171.98   75.09
   9  13  -5    3.60   35.90
  -9  13   5   12.90   45.30
  -7 -13   5  -87.29   68.99
   7  13  -5  -15.00   34.30
  -5 -13   5 -121.79   70.09
   5  13  -5  -32.40   31.10
  -5  13   5  -99.19   38.10
  -3 -13   5  -91.79   69.19
  -3  13   5  -33.80   40.50
   3  13  -5  -47.50   31.20
  -1 -13   5  -72.49   72.39
  -1  13   5  -76.39   39.50
   1  13  -5   12.20   35.30
   1 -13   5  -64.09   69.39
   1  13   5  -79.79   41.20
  -1  13  -5  -19.10   30.30
   3 -13   5  -30.90   72.99
   3  13   5  -49.70   42.70
  -3  13  -5   -3.20   32.20
   5 -13   5   60.49   73.49
   5  13   5   34.20   47.30
  -5  13  -5   51.29   32.70
   7 -13   5  129.29   76.39
   7  13   5   90.79   52.99
   9 -13   5  132.49   76.19
   9  13   5  -64.99   47.40
  -9  13  -5  -56.59   49.20
 -10 -14   5 -187.98   70.49
 -10  14   5  -49.99   77.59
  10  14  -5  -54.09   35.90
   8  14  -5  -31.30   37.10
  -6 -14   5 -112.09   73.19
   6  14  -5  -24.70   38.30
  -4 -14   5 -184.78   73.19
   4  14  -5   -6.60   35.20
  -4  14   5 -115.69   42.00
  -2 -14   5 -109.99   76.19
  -2  14   5 -103.69   41.30
   2  14  -5  -15.20   35.80
   0 -14   5  -80.29   77.69
   0  14   5  -75.59   42.20
   0  14  -5    5.00   34.40
   2 -14   5  -12.80   75.19
   2  14   5  -53.89   47.50
  -2  14  -5   -7.30   36.10
   4 -14   5   -5.10   78.39
  -4  14  -5   -2.40   33.60
   4  14   5 -100.09   45.90
   6  14   5  -53.79   50.89
 -28   0   6  171.08   56.79
 -28   0   6  163.48   43.30
 -26   0   6   94.79   48.00
 -26   0   6   30.60   31.00
 -24   0   6   32.20   28.70
 -24   0   6   77.69   42.60
 -22   0   6   35.90   36.60
 -22   0   6  -10.60   24.30
 -20   0   6   59.39   24.40
 -20   0   6   53.19   31.50
 -18   0   6  398.06   36.90
 -18   0   6  363.26   48.30
 -16   0   6  244.18   28.30
 -16   0   6  198.68   35.20
 -14   0   6   31.10   16.60
 -14   0   6   44.80   24.70
 -12   0   6  145.89   21.00
 -12   0   6  102.99   25.40
 -10   0   6 1937.11   59.69
  -8   0   6 3560.64   71.49
   8   0  -6 3740.53   47.50
  -6   0   6 4530.15   72.29
   6   0  -6 4605.74   55.59
   4   0  -6 4758.52   59.99
  -4   0   6 4882.41   66.69
   2   0  -6  808.42   29.10
  -2   0   6  797.92   28.80
   0   0   6  593.74   28.80
   0   0  -6  619.24   28.40
  -2   0  -6  561.94   29.20
   2   0   6  522.95   29.10
   4   0   6  339.37   29.50
  -4   0  -6  368.16   27.90
  -6   0  -6 1619.94   52.09
   6   0   6 1645.34   53.29
  -8   0  -6   -1.40   14.80
   8   0   6    2.20   16.10
   8   0   6   -2.30   16.90
 -10   0  -6  263.57   32.00
 -10   0  -6  258.47   30.10
  10   0   6  252.57   33.30
 -12   0  -6  861.31   48.80
  12   0   6  749.23   52.59
 -12   0  -6  787.52   50.59
 -14   0  -6  825.92   53.59
  14   0   6  940.71   59.29
 -14   0  -6  849.91   55.89
  16   0   6  786.62   58.39
 -29  -1   6   10.20   37.80
 -29  -1   6  111.29   55.89
 -29   1   6   33.90   53.29
 -29   1   6  111.49   42.70
 -27  -1   6   20.80   33.30
 -27  -1   6   39.30   46.60
 -27   1   6   62.49   35.80
 -27   1   6    1.90   45.40
 -25  -1   6   55.69   43.80
 -25  -1   6   25.10   29.80
 -25   1   6   53.89   34.00
 -25   1   6   96.39   46.70
 -23  -1   6   12.50   35.50
 -23   1   6   70.59   29.20
 -23   1   6   27.70   36.80
 -21  -1   6   -2.10   31.00
 -21   1   6    1.40   30.70
 -21   1   6   15.70   24.70
 -19  -1   6  -11.90   26.00
 -19   1   6    1.90   22.60
 -19   1   6   -2.30   26.80
 -17  -1   6  364.56   45.70
 -17   1   6  377.36   47.60
 -17   1   6  381.46   36.20
 -15  -1   6   36.20   22.50
 -15   1   6   43.40   25.60
 -15   1   6   53.89   19.00
 -13  -1   6   84.19   24.70
 -13   1   6   61.79   24.70
 -11  -1   6  442.96   38.60
 -11  -1   6  445.26   25.70
 -11   1   6  433.16   37.80
  11   1  -6  438.06   22.50
  -9  -1   6 1629.54   55.49
  -9  -1   6 1667.03   34.90
   9   1  -6 1633.94   35.60
  -9   1   6 1600.54   53.69
   7  -1  -6 2083.39   36.60
  -7  -1   6 2072.19   56.09
  -7   1   6 2108.89   53.09
   7   1  -6 2123.19   40.00
  -7   1   6 2130.79   38.80
   5  -1  -6 4524.45   58.29
  -5  -1   6 4368.66   71.19
  -5   1   6 4503.65   65.39
   5   1  -6 4541.85   58.99
  -5   1   6 4511.65   58.79
  -3  -1   6 1919.71   47.60
   3  -1  -6 1926.71   42.90
  -3   1   6 1918.81   43.00
   3   1  -6 1937.51   41.50
   1  -1  -6  152.98   18.30
  -1  -1   6  171.78   22.10
   1   1  -6  169.58   19.10
  -1   1   6  175.98   20.10
  -1  -1  -6   17.30   12.50
   1  -1   6   17.20   15.80
   1   1   6   30.10   14.30
  -1   1  -6   32.80   11.50
  -3  -1  -6   40.80   15.40
   3  -1   6   41.10   18.20
   3  -1   6   39.80   13.80
  -3   1  -6   38.20   13.20
  -3   1  -6   32.80   13.10
   3   1   6   31.90   16.70
  -5  -1  -6   54.89   16.90
   5  -1   6   54.69   20.00
   5  -1   6   54.79   16.80
  -5   1  -6   43.00   15.10
  -5   1  -6   53.19   15.90
   5   1   6   47.10   17.50
   7  -1   6   20.10   15.20
   7  -1   6   31.10   19.20
  -7  -1  -6   19.30   15.80
  -7   1  -6   29.80   14.60
   7   1   6   11.60   17.80
  -7   1  -6   23.10   13.50
   9  -1   6   43.60   25.50
  -9  -1  -6   52.49   20.90
   9  -1   6   45.90   20.50
  -9   1  -6   45.90   18.50
   9   1   6   36.40   22.70
  -9   1  -6   36.80   18.80
  11  -1   6  388.26   47.60
 -11  -1  -6  396.66   40.30
  11  -1   6  451.65   43.60
 -11   1  -6  382.36   39.50
  11   1   6  417.46   42.00
 -11   1  -6  412.46   39.40
  13  -1   6  540.05   49.70
  13  -1   6  580.04   56.79
 -13   1  -6  457.05   44.90
  13   1   6  525.45   52.99
 -13   1  -6  530.45   45.50
  15  -1   6  555.94   52.19
  15  -1   6  477.15   59.49
  15   1   6  576.54   56.69
 -15   1  -6  499.95   48.50
 -15   1  -6  539.15   50.69
  17  -1   6  292.37   55.09
  17   1   6  267.87   43.00
 -28  -2   6  -26.60   46.90
 -28   2   6  -55.89   36.00
 -28   2   6   41.30   50.29
 -26  -2   6   17.10   42.40
 -26   2   6  -60.29   41.30
 -26   2   6  -31.50   28.80
 -24  -2   6   27.40   37.20
 -24   2   6    1.00   34.60
 -24   2   6   -0.90   27.40
 -22  -2   6  137.49   43.50
 -22   2   6   49.30   36.40
 -22   2   6   62.59   27.30
 -20  -2   6  156.38   40.70
 -20   2   6  148.99   39.90
 -20   2   6   77.99   27.50
 -18  -2   6  113.49   32.90
 -18   2   6   80.69   26.10
 -18   2   6   81.69   30.70
 -16  -2   6  144.09   33.60
 -16   2   6  127.29   32.60
 -14  -2   6  145.89   30.40
 -14   2   6  150.88   31.70
  14   2  -6  121.99   17.60
 -12  -2   6  365.56   40.40
 -12   2   6  395.76   40.70
  12   2  -6  341.87   24.50
 -10  -2   6  139.29   27.40
  10   2  -6  156.38   17.10
 -10   2   6  160.28   27.00
  -8  -2   6   24.80   18.70
   8   2  -6   13.80   10.80
  -8   2   6   26.40   16.90
  -6  -2   6   47.70   19.30
   6  -2  -6   55.49   12.10
  -6   2   6   53.09   15.80
  -6   2   6   44.60   12.70
   6   2  -6   56.59   11.90
   4  -2  -6  249.38   22.40
  -4  -2   6  261.37   32.50
   4   2  -6  247.38   21.00
  -4   2   6  271.97   25.30
   2  -2  -6  104.09   16.40
  -2  -2   6  140.09   24.40
  -2   2   6  134.69   18.90
   2   2  -6  129.49   16.70
   0  -2   6  353.26   34.20
   0  -2  -6  343.67   27.20
   0   2   6  319.47   28.90
   0   2  -6  383.96   24.70
  -2  -2  -6  244.78   27.70
   2  -2   6  262.37   29.20
   2   2   6  246.58   28.00
  -2   2  -6  283.67   24.60
  -2   2  -6  242.78   24.40
  -4  -2  -6 1407.36   51.29
   4  -2   6 1409.26   53.09
   4   2   6 1398.16   51.59
  -4   2  -6 1388.66   46.50
  -4   2  -6 1432.16   44.60
   6  -2   6  974.30   42.10
   6  -2   6  942.91   50.29
  -6  -2  -6  969.60   46.10
   6   2   6  906.41   46.80
  -6   2  -6  909.91   39.30
  -6   2  -6  896.91   42.90
   8  -2   6  446.76   36.20
   8  -2   6  521.35   46.30
   8   2   6  442.16   41.20
  -8   2  -6  525.05   38.60
  -8   2  -6  543.45   36.20
  10  -2   6  131.89   35.20
  10  -2   6   99.29   26.20
 -10   2  -6  116.29   27.70
  10   2   6  100.99   28.60
 -10   2  -6   54.29   20.10
  12  -2   6   22.40   31.60
  12  -2   6    0.00   21.80
 -12   2  -6   31.30   23.10
 -12   2  -6   30.10   20.90
  12   2   6    2.60   28.50
  14  -2   6   82.89   29.10
  14  -2   6   45.10   35.70
 -14   2  -6   39.20   28.40
  14   2   6   58.89   35.80
 -14   2  -6   46.00   23.80
  16  -2   6   58.49   35.20
  16  -2   6   42.30   29.10
  16   2   6   75.29   35.30
 -16   2  -6   30.90   28.40
  18  -2   6   31.10   35.30
  18   2   6   25.00   36.00
 -18   2  -6   -8.10   27.60
 -27  -3   6  -23.90   43.00
 -27   3   6  -59.09   44.20
 -25  -3   6   28.00   43.10
 -25   3   6   -7.60   41.10
 -23  -3   6   20.80   39.20
 -23   3   6   34.20   37.00
 -21  -3   6  213.58   48.10
 -21   3   6  172.58   44.10
 -19  -3   6  506.65   58.09
 -19   3   6  490.45   55.29
 -17  -3   6  601.74   55.09
  17   3  -6  564.84   38.60
 -17   3   6  544.35   54.59
 -15  -3   6  730.93   55.59
  15   3  -6  770.42   37.20
 -15   3   6  730.83   55.19
 -13  -3   6   89.99   28.50
 -13   3   6  138.79   31.60
  13   3  -6   97.59   18.10
 -11  -3   6    7.00   22.10
 -11   3   6    0.20   18.60
  11   3  -6    4.60   13.20
  -9  -3   6  140.09   28.70
  -9   3   6  148.29   26.80
   9   3  -6  164.68   20.00
  -7  -3   6  714.33   45.10
  -7   3   6  770.22   29.10
  -7   3   6  727.13   39.00
   7   3  -6  733.23   31.50
  -5  -3   6 3084.79   71.19
  -5   3   6 3065.89   57.39
   5   3  -6 3121.29   55.89
  -5   3   6 3060.99   52.99
  -3  -3   6   66.39   24.00
   3   3  -6   78.09   15.40
  -3   3   6  100.59   18.10
  -1  -3   6   17.10   21.20
   1   3  -6    9.30   10.90
  -1   3   6   -7.50   14.70
   1  -3   6  691.23   44.50
   1   3   6  651.73   39.30
  -1   3  -6  704.93   32.60
   3  -3   6 2455.25   70.29
   3   3   6 2524.85   64.99
  -3   3  -6 2612.34   58.29
  -3   3  -6 2536.85   64.49
   5  -3   6 2128.09   70.79
  -5   3  -6 2205.78   64.79
   5   3   6 2122.19   63.39
  -5   3  -6 2238.78   57.19
   7  -3   6 1196.48   63.19
   7   3   6 1232.08   55.49
  -7   3  -6 1269.57   56.19
  -7   3  -6 1250.27   47.40
   9  -3   6  498.25   41.10
   9  -3   6  434.96   54.59
   9   3   6  524.95   48.10
  -9   3  -6  484.05   44.20
  -9   3  -6  511.65   39.30
  11  -3   6   14.00   21.70
  11  -3   6   42.70   36.60
 -11   3  -6   10.90   18.90
  11   3   6    1.70   28.40
 -11   3  -6   34.20   21.80
  13  -3   6  113.59   29.80
  13  -3   6   41.80   40.80
 -13   3  -6   77.59   25.50
  13   3   6  101.29   36.60
 -13   3  -6   80.89   28.20
  15  -3   6   81.29   38.30
  15  -3   6   80.29   29.40
 -15   3  -6   81.99   31.40
 -15   3  -6   58.89   27.40
  15   3   6   39.10   36.30
  17  -3   6   89.89   43.00
  17   3   6   -3.30   37.00
 -17   3  -6   13.90   31.60
  19  -3   6   99.69   44.60
  19   3   6    7.50   41.80
 -19   3  -6   37.40   35.40
 -28  -4   6   34.80   51.19
 -28   4   6   47.80   54.79
 -26  -4   6   82.39   49.80
 -26   4   6  -22.70   40.10
 -24  -4   6   -9.00   39.90
 -24   4   6  -16.50   38.10
 -22  -4   6   57.49   40.10
 -22   4   6   23.20   36.90
 -20  -4   6  152.58   42.90
 -20   4   6  148.79   40.80
 -18  -4   6  383.16   51.89
 -18   4   6  470.95   56.59
  18   4  -6  398.26   42.40
 -16  -4   6  531.35   54.39
 -16   4   6  524.05   54.39
  16   4  -6  517.55   40.10
 -14  -4   6  422.76   50.69
 -14   4   6  383.26   46.50
  14   4  -6  396.16   35.20
 -12  -4   6    8.50   26.00
 -12   4   6  -20.50   20.80
  12   4  -6    4.90   16.10
 -10  -4   6  259.07   37.30
 -10   4   6  236.38   34.40
  10   4  -6  249.58   26.90
  -8  -4   6 1780.22   66.09
  -8   4   6 1758.72   57.99
   8   4  -6 1692.73   46.90
  -6  -4   6  541.35   48.50
   6   4  -6  464.15   30.00
  -6   4   6  506.85   33.50
  -6   4   6  456.95   29.50
  -4  -4   6 1744.93   64.69
   4   4  -6 1854.51   48.20
  -4   4   6 1851.21   47.50
  -2  -4   6    9.90   25.20
  -2   4   6  -12.30   15.90
   2   4  -6    7.40   12.30
   0  -4   6  245.08   36.40
   0   4   6  234.08   28.40
   0   4  -6  288.37   26.70
   2  -4   6 1089.19   58.39
   2   4   6 1030.70   49.10
  -2   4  -6 1037.10   47.00
  -2   4  -6 1070.49   41.40
   4  -4   6 1635.74   70.99
  -4   4  -6 1692.93   51.19
   4   4   6 1693.63   59.99
  -4   4  -6 1737.43   62.09
   6  -4   6 1232.38   68.39
  -6   4  -6 1213.88   47.70
  -6   4  -6 1213.38   57.19
   6   4   6 1209.68   56.79
   8  -4   6  456.05   60.79
   8   4   6  392.76   42.00
  -8   4  -6  421.66   35.50
  -8   4  -6  433.06   44.30
  10  -4   6    6.20   36.90
  10  -4   6  -12.70   20.10
  10   4   6   20.50   29.60
 -10   4  -6   -9.40   16.20
 -10   4  -6    6.70   22.40
  12  -4   6  304.47   36.30
  12  -4   6  260.47   52.59
  12   4   6  298.97   46.60
 -12   4  -6  234.28   32.70
 -12   4  -6  235.78   39.70
  14  -4   6   52.09   28.00
  14  -4   6   33.20   40.80
 -14   4  -6   41.80   29.20
 -14   4  -6   52.19   24.40
  14   4   6   82.49   39.40
  16  -4   6   76.59   43.80
  16   4   6   44.90   40.90
 -16   4  -6   35.80   32.90
  18  -4   6  100.29   45.90
 -18   4  -6   76.19   38.90
  18   4   6   37.20   45.20
  20  -4   6  120.69   49.80
 -20   4  -6   14.30   37.50
 -20   4  -6   44.40   39.00
  20   4   6   19.00   46.10
 -27  -5   6  -74.09   46.20
 -27   5   6   -1.00   46.00
 -25  -5   6   18.70   47.80
 -25   5   6   67.59   48.20
 -23  -5   6  -18.70   40.90
 -23   5   6   67.39   42.40
 -21  -5   6   23.70   41.10
 -21   5   6  -14.60   31.90
 -19  -5   6   10.40   37.50
 -19   5   6  -11.20   28.30
  19   5  -6  -24.30   26.90
 -17  -5   6  -15.20   32.60
 -17   5   6   34.70   32.20
  17   5  -6   49.10   27.00
 -15  -5   6   11.20   30.30
  15   5  -6   13.40   22.60
 -15   5   6   22.70   28.20
 -13  -5   6   89.09   33.70
 -13   5   6   76.59   28.70
  13   5  -6   85.79   24.40
 -11  -5   6   30.50   29.50
  11   5  -6   38.50   18.80
 -11   5   6   11.90   23.80
  -9  -5   6   20.00   29.40
   9   5  -6   11.90   16.40
  -9   5   6   -2.80   19.70
  -7  -5   6  619.84   57.39
  -7   5   6  656.13   32.90
  -7   5   6  635.54   39.80
   7   5  -6  699.73   36.30
  -5  -5   6   22.00   32.20
  -5   5   6    5.30   17.90
   5   5  -6   12.40   14.70
  -3  -5   6   20.20   31.90
  -3   5   6   19.50   20.90
   3   5  -6    5.70   14.40
  -1  -5   6  -25.50   30.80
  -1   5   6  -25.00   20.20
   1   5  -6    8.10   13.90
   1  -5   6   -4.40   31.90
   1   5   6   10.10   21.30
  -1   5  -6   22.30   13.60
   3  -5   6   58.29   35.40
  -3   5  -6   97.59   19.70
  -3   5  -6  164.58   30.50
   3   5   6   90.29   25.80
   5  -5   6   35.90   37.00
   5   5   6   67.49   26.30
  -5   5  -6   54.59   24.70
  -5   5  -6   25.20   16.30
   7  -5   6   -9.90   37.30
  -7   5  -6   35.30   16.90
  -7   5  -6   13.20   15.50
   7   5   6    5.10   27.10
  -7   5  -6   28.80   23.10
   9  -5   6   21.40   41.80
  -9   5  -6  -11.60   17.70
   9   5   6  -13.90   31.10
  -9   5  -6  -13.70   21.80
  -9   5  -6  -16.10   15.90
  11  -5   6  396.66   46.30
  11  -5   6  246.78   56.79
 -11   5  -6  265.57   43.80
 -11   5  -6  279.47   33.20
  11   5   6  288.07   47.90
 -11   5  -6  305.37   35.50
  13  -5   6   26.10   43.80
  13  -5   6   -8.00   23.70
 -13   5  -6  -10.50   21.50
 -13   5  -6   41.60   26.00
  13   5   6   24.80   38.70
 -13   5  -6  -13.20   26.80
  15  -5   6   89.89   50.69
  15   5   6    0.20   41.00
 -15   5  -6   37.40   35.70
 -15   5  -6    4.10   29.80
  17  -5   6   47.70   48.20
 -17   5  -6    1.50   33.50
 -17   5  -6   31.90   35.30
  17   5   6   32.20   44.30
  19  -5   6  153.78   51.29
 -19   5  -6   53.19   39.30
  19   5   6    6.80   45.70
 -19   5  -6  -66.19   34.30
  21  -5   6  146.39   53.39
 -21   5  -6   22.10   43.00
 -21   5  -6   68.19   45.10
 -26  -6   6  -15.30   49.70
 -26   6   6    9.20   44.70
 -24  -6   6  -26.30   45.80
 -24   6   6   48.10   45.10
 -22  -6   6  -36.50   41.50
 -22   6   6   17.00   38.40
 -20  -6   6   91.29   46.80
 -20   6   6   57.89   38.70
  20   6  -6   -7.30   32.80
 -18  -6   6  139.89   46.80
  18   6  -6  205.38   38.50
 -18   6   6  141.29   43.60
 -16  -6   6  102.19   40.40
 -16   6   6   82.99   37.90
  16   6  -6  119.59   32.00
 -14  -6   6   34.70   35.40
 -14   6   6    5.90   29.00
  14   6  -6   14.20   25.40
 -12  -6   6   26.70   33.90
  12   6  -6    1.40   21.20
 -12   6   6   12.80   27.50
 -10  -6   6  137.19   39.50
  10   6  -6  151.18   26.10
 -10   6   6  118.89   31.80
  -8  -6   6  195.48   42.00
  -8   6   6  181.28   29.90
  -8   6   6  196.08   23.90
   8   6  -6  206.18   26.30
   6  -6  -6  131.49   30.80
  -6  -6   6   72.09   37.50
  -6   6   6   80.39   21.40
   6   6  -6  117.79   21.30
  -6   6   6   90.79   22.30
  -4  -6   6  423.66   50.59
  -4   6   6  389.16   37.50
   4   6  -6  401.36   32.90
  -2  -6   6    1.70   35.30
  -2   6   6   19.40   22.70
   2   6  -6   -3.20   15.40
   0  -6   6  106.79   40.20
   0   6  -6   92.89   20.90
   0   6   6   91.09   28.40
   2  -6   6  279.77   48.30
  -2   6  -6  363.06   31.80
   2   6   6  300.67   36.60
   4  -6   6  451.95   59.39
  -4   6  -6  430.46   34.90
   4   6   6  449.95   51.79
  -4   6  -6  441.76   46.00
   6  -6   6  492.35   62.49
  -6   6  -6  504.65   36.40
  -6   6  -6  431.86   49.50
   6   6   6  513.85   56.39
   8  -6   6  325.87   61.99
   8   6   6  326.97   46.40
  -8   6  -6  332.97   36.10
  -8   6  -6  320.17   46.00
  10  -6   6   -7.00   49.20
 -10   6  -6  -23.20   28.90
  10   6   6   27.40   39.40
 -10   6  -6  -17.70   19.60
  12  -6   6   -1.00   49.99
 -12   6  -6  -22.50   32.30
  12   6   6   11.40   40.00
 -12   6  -6  -12.40   20.60
 -12   6  -6  -54.39   22.60
  14  -6   6   89.69   54.29
 -14   6  -6  106.79   33.00
  14   6   6   52.39   44.00
 -14   6  -6  101.79   40.50
  16  -6   6   98.19   54.29
 -16   6  -6  -27.20   30.90
  16   6   6   18.50   46.10
 -16   6  -6   27.60   36.80
  18  -6   6  186.08   55.79
 -18   6  -6   32.80   41.10
 -18   6  -6   -5.90   35.50
  18   6   6    7.90   48.10
  20  -6   6  160.48   55.19
 -20   6  -6   88.19   47.50
  20   6   6   -9.00   50.89
 -20   6  -6  -34.60   41.10
 -25  -7   6  -24.30   51.19
 -25   7   6   34.40   48.90
 -23  -7   6  -75.19   46.00
 -23   7   6   45.50   46.50
 -21  -7   6    2.20   49.30
 -21   7   6   49.10   41.30
  21   7  -6   28.60   39.10
 -19  -7   6   96.69   50.09
 -19   7   6  109.69   43.40
  19   7  -6  125.69   39.60
 -17  -7   6  354.36   58.99
  17   7  -6  370.76   46.30
 -17   7   6  299.37   52.89
 -15  -7   6  187.38   50.19
 -15   7   6  210.58   44.50
  15   7  -6  222.18   39.10
 -13  -7   6   96.59   44.10
 -13   7   6   48.70   32.20
  13   7  -6  -15.30   26.50
 -11  -7   6   54.69   43.50
  11   7  -6    7.90   23.00
 -11   7   6   10.70   25.60
   9  -7  -6   53.49   38.60
  -9  -7   6  113.39   45.40
   9   7  -6  102.49   25.30
  -9   7   6   83.29   28.90
  -9   7   6   70.99   21.80
  -7  -7   6  391.36   53.49
   7  -7  -6  380.06   46.60
  -7   7   6  459.95   41.40
  -7   7   6  433.76   37.80
   7   7  -6  448.16   39.60
  -5  -7   6  320.47   52.59
   5  -7  -6  413.46   49.20
   5   7  -6  411.66   35.20
  -5   7   6  359.06   34.70
  -5   7   6  362.86   40.40
  -3  -7   6   75.39   44.60
  -3   7   6  158.18   30.50
   3   7  -6  124.39   23.70
  -1  -7   6  -24.50   42.20
   1   7  -6    5.20   17.40
  -1   7   6   46.50   27.50
   1  -7   6  455.95   60.39
  -1   7  -6  448.26   35.80
   1   7   6  460.15   49.60
   3  -7   6  890.91   83.09
  -3   7  -6  908.21   44.40
   3   7   6  929.81   61.39
  -3   7  -6  953.20   59.09
   5  -7   6 1141.89   92.59
  -5   7  -6 1147.39   49.99
  -5   7  -6 1165.58   68.19
   5   7   6 1189.98   70.19
   7  -7   6  507.05   73.59
  -7   7  -6  550.14   58.59
   7   7   6  435.06   51.19
  -7   7  -6  526.25   40.70
   9  -7   6  242.98   67.19
  -9   7  -6  245.38   48.00
   9   7   6  242.78   49.00
  -9   7  -6  348.07   39.90
  11  -7   6   78.99   54.99
 -11   7  -6   50.89   23.50
 -11   7  -6   46.20   36.60
  11   7   6   34.30   41.80
  13  -7   6  151.68   60.59
  13   7   6   -8.20   42.00
 -13   7  -6   -3.50   35.60
  15  -7   6  115.09   59.29
 -15   7  -6    4.90   39.60
  15   7   6   42.10   47.80
  17  -7   6  127.39   59.09
  17   7   6  -11.20   48.70
 -17   7  -6   23.40   41.60
  19  -7   6  148.49   58.79
 -19   7  -6  118.59   51.39
  19   7   6   10.00   54.19
 -24  -8   6  -69.59   51.89
 -24   8   6    2.50   46.90
 -22  -8   6  -11.40   50.49
 -22   8   6   31.50   43.10
  22   8  -6  -69.69   59.49
 -20  -8   6    3.10   51.99
 -20   8   6   85.99   44.10
  20   8  -6  -42.10   37.20
 -18  -8   6   63.39   52.79
 -18   8   6   77.29   41.40
  18   8  -6   30.30   37.90
 -16  -8   6   58.89   49.10
  16   8  -6   51.79   36.60
 -16   8   6  107.99   41.30
 -14  -8   6   77.39   49.99
  14   8  -6   77.29   35.40
 -14   8   6  133.69   39.80
 -12  -8   6   40.80   46.60
  12  -8  -6  -25.40   44.00
  12   8  -6   31.30   28.90
 -12   8   6   44.70   32.10
  10  -8  -6  159.88   48.10
 -10  -8   6  234.98   56.49
 -10   8   6  146.19   37.50
  10   8  -6  181.48   32.80
  -8  -8   6   28.40   48.90
   8  -8  -6   84.59   43.20
  -8   8   6   29.70   24.90
  -8   8   6   59.79   28.80
   8   8  -6   11.60   21.60
  -6  -8   6    2.90   49.10
   6  -8  -6  -12.80   37.90
  -6   8   6   23.60   25.60
  -6   8   6    6.50   25.30
   6   8  -6   49.90   23.40
  -4  -8   6  112.79   50.59
   4  -8  -6   81.59   41.60
  -4   8   6   72.89   27.80
  -4   8   6  101.39   30.40
   4   8  -6   79.39   22.40
  -2  -8   6   55.89   50.59
  -2   8   6   83.99   31.40
   2   8  -6   35.40   19.50
   0  -8   6   21.10   52.69
   0   8   6   -6.40   31.60
   0   8  -6   23.40   19.90
   2  -8   6  253.37   60.69
  -2   8  -6  219.38   29.60
   2   8   6  259.77   42.70
   4  -8   6  475.75   68.89
  -4   8  -6  631.74   60.29
  -4   8  -6  563.44   41.50
   4   8   6  676.23   65.09
   6  -8   6  154.38   65.89
  -6   8  -6  178.68   28.70
  -6   8  -6  250.67   46.30
   6   8   6  216.48   46.00
   8  -8   6  383.96   75.49
  -8   8  -6  386.66   40.20
  -8   8  -6  341.67   53.79
   8   8   6  298.37   51.79
  10  -8   6   54.09   57.79
 -10   8  -6   -5.90   20.80
 -10   8  -6    0.70   35.90
  10   8   6   13.60   41.90
  12  -8   6   52.99   58.89
 -12   8  -6    9.00   36.70
  12   8   6  -42.80   43.40
  14  -8   6   18.20   57.89
  14   8   6  -29.00   47.00
 -14   8  -6   75.39   45.00
  16  -8   6   73.49   59.99
 -16   8  -6   43.40   46.30
  16   8   6  -41.20   49.40
  18  -8   6  111.99   63.29
  18   8   6  -86.09   52.99
 -18   8  -6   -8.60   45.10
 -23  -9   6  -52.29   54.39
 -23   9   6   81.59   50.09
 -21  -9   6 -115.79   48.30
  21  -9  -6   86.09   54.69
  21   9  -6 -120.79   42.70
 -21   9   6    3.20   41.50
 -19  -9   6  -49.20   50.99
  19  -9  -6   81.89   55.09
  19   9  -6  -91.19   39.70
 -19   9   6   46.80   40.30
  17  -9  -6   81.29   51.79
 -17  -9   6  -81.09   48.00
 -17   9   6    9.20   37.30
  17   9  -6  -33.80   39.70
 -15  -9   6  -62.09   50.69
  15  -9  -6   64.79   47.80
 -15   9   6   41.80   36.90
  15   9  -6  -49.60   33.60
 -13  -9   6   12.60   51.49
  13  -9  -6  -19.00   44.20
 -13   9   6   18.40   36.00
  13   9  -6   21.30   31.90
  11  -9  -6  180.58   53.49
 -11  -9   6  153.98   58.89
 -11   9   6  171.28   41.80
  11   9  -6   91.09   33.00
   9  -9  -6   17.30   46.10
  -9  -9   6   60.09   58.09
  -9   9   6   54.29   47.10
  -9   9   6   19.80   32.70
   9   9  -6   31.50   26.90
  -7  -9   6  320.37   65.19
   7  -9  -6  381.86   58.29
  -7   9   6  339.97   38.40
   7   9  -6  443.56   46.10
  -7   9   6  375.56   46.70
  -5  -9   6   51.99   57.29
   5  -9  -6  110.19   51.09
   5   9  -6   41.50   24.50
  -5   9   6   78.89   32.40
  -5   9   6   56.19   32.20
  -3  -9   6  128.29   60.19
   3  -9  -6  184.48   53.99
  -3   9   6  173.98   37.50
   3   9  -6  210.88   33.80
  -3   9   6  247.48   37.10
  -1  -9   6   11.90   56.09
   1   9  -6   18.60   21.80
  -1   9   6   35.20   34.60
   1  -9   6   12.50   58.39
  -1   9  -6   18.80   22.70
   1   9   6   43.50   37.60
   3  -9   6  -30.10   58.49
  -3   9  -6  -13.90   22.00
   3   9   6   26.30   39.10
   5  -9   6  -50.09   57.89
   5   9   6  -24.20   37.20
  -5   9  -6   25.90   22.60
  -5   9  -6   12.60   35.10
   7  -9   6   15.70   58.19
  -7   9  -6   13.30   21.80
  -7   9  -6    3.00   36.50
   7   9   6   40.40   40.00
   9  -9   6   74.09   61.29
  -9   9  -6    7.10   21.50
  -9   9  -6   48.50   41.00
   9   9   6    2.80   42.60
  11  -9   6   30.30   63.29
 -11   9  -6    4.00   40.50
  11   9   6   74.09   50.39
  13  -9   6  125.99   68.79
  13   9   6   68.19   53.29
 -13   9  -6   50.29   45.20
  15  -9   6  133.89   68.59
  15   9   6  -40.00   53.09
 -15   9  -6   26.40   46.00
  17  -9   6  189.28   71.19
 -17   9  -6   63.89   50.39
  17   9   6   -9.60   58.39
  22 -10  -6  157.28   59.69
 -22 -10   6  -50.89   57.79
 -22  10   6    6.10   51.19
  22  10  -6 -108.19   48.40
  20 -10  -6   96.59   54.79
 -20 -10   6  -42.50   56.89
  20  10  -6 -135.39   43.20
 -20  10   6   -5.20   44.00
  18 -10  -6  151.68   58.59
 -18 -10   6  -39.70   53.79
 -18  10   6   11.30   43.30
 -16 -10   6  -88.69   55.49
  16 -10  -6   95.39   53.49
  16  10  -6  -34.90   38.70
 -16  10   6    7.00   40.60
 -14 -10   6  -78.49   51.59
  14 -10  -6  128.99   52.39
 -14  10   6    1.40   38.00
  14  10  -6  -46.70   34.20
  12 -10  -6   24.60   45.30
 -12 -10   6  -59.09   51.99
  12  10  -6  -38.80   30.80
 -12  10   6   49.90   37.20
  10 -10  -6  210.38   54.99
 -10 -10   6  155.28   62.99
  10  10  -6  157.68   37.30
 -10  10   6  197.38   44.30
   8 -10  -6  342.87   61.49
  -8 -10   6  239.08   64.69
  -8  10   6  374.96   49.99
  -8  10   6  227.08   39.60
   8  10  -6  223.98   38.40
  -6 -10   6  309.57   73.09
   6 -10  -6  633.94   80.79
  -6  10   6  453.45   53.39
   6  10  -6  362.36   42.50
  -6  10   6  468.35   52.39
  -4 -10   6  295.37   71.79
   4  10  -6  451.25   48.00
  -4  10   6  395.96   51.59
  -4  10   6  474.15   55.19
  -2 -10   6   73.99   66.99
  -2  10   6   76.19   37.70
   2  10  -6   59.39   27.30
   0 -10   6    6.90   63.49
   0  10  -6  -28.30   23.10
   0  10   6  -11.40   36.00
   2 -10   6  -69.89   58.89
   2  10   6   25.30   38.60
  -2  10  -6  -34.00   21.90
   4 -10   6   -5.40   57.89
   4  10   6  -23.10   38.50
  -4  10  -6    2.40   24.60
   6 -10   6   -0.70   59.09
   6  10   6   13.90   40.90
  -6  10  -6  -18.10   22.60
  -6  10  -6  -25.30   34.70
   8 -10   6   -2.90   60.99
  -8  10  -6  -56.99   37.80
  -8  10  -6   -3.10   24.90
   8  10   6  -49.50   40.50
  10 -10   6   98.19   71.19
 -10  10  -6   43.30   45.40
  10  10   6   15.70   47.60
  12 -10   6   17.20   65.29
  12  10   6  -33.10   50.39
 -12  10  -6   46.40   48.30
  14 -10   6  206.78   73.99
  14  10   6  -29.10   53.19
 -14  10  -6   73.29   55.89
 -19 -11   6 -116.39   56.99
  19 -11  -6  155.68   55.99
  19  11  -6 -126.89   42.60
 -19  11   6   48.90   51.19
 -17 -11   6  -77.39   60.79
  17 -11  -6   74.19   55.79
 -17  11   6   41.40   45.20
  17  11  -6  -85.89   40.70
 -15 -11   6  -99.39   56.09
  15 -11  -6   80.19   53.69
  15  11  -6  -45.30   39.40
 -15  11   6   27.60   44.50
 -13 -11   6  -63.69   57.79
  13 -11  -6   98.09   54.29
  13  11  -6  -25.70   36.00
 -13  11   6   36.50   39.70
  11 -11  -6  137.49   53.09
 -11 -11   6 -128.29   54.69
  11  11  -6   28.30   34.90
 -11  11   6   62.99   42.50
   9 -11  -6  266.87   61.29
  -9 -11   6   62.09   65.39
   9  11  -6  119.79   37.40
  -9  11   6  242.28   49.20
   7 -11  -6  255.07   64.89
  -7 -11   6  109.49   64.49
  -7  11   6  125.89   38.30
  -7  11   6  193.08   46.90
   7  11  -6  100.49   35.10
  -5 -11   6  160.88   69.29
  -5  11   6  164.98   41.10
   5  11  -6  130.29   34.10
  -3 -11   6  147.49   69.29
  -3  11   6  174.68   40.70
   3  11  -6  142.49   35.30
  -1 -11   6  -27.10   61.89
  -1  11   6  -22.60   34.90
   1  11  -6    6.50   26.50
   1 -11   6  -56.09   62.79
   1  11   6  -26.60   36.30
  -1  11  -6  -15.70   25.20
   3 -11   6    9.90   64.59
  -3  11  -6  -21.30   23.80
   3  11   6   -9.10   40.10
   5 -11   6  -31.70   62.79
   5  11   6  -36.10   40.50
  -5  11  -6   15.80   27.70
   7 -11   6   22.20   63.79
  -7  11  -6   12.20   25.00
   7  11   6  -25.00   42.30
  -7  11  -6  -78.49   37.30
   9 -11   6   16.90   64.39
   9  11   6   17.30   47.00
  -9  11  -6  -24.20   45.50
  11 -11   6   90.49   73.59
 -11  11  -6  -17.70   47.40
  11  11   6  -36.50   49.50
  13 -11   6  107.59   73.89
 -13  11  -6  111.59   57.89
  13  11   6  -94.59   49.00
 -18 -12   6 -148.09   63.39
 -18  12   6   36.00   48.80
  18  12  -6 -100.49   45.50
  16 -12  -6  164.08   59.19
 -16 -12   6 -139.89   63.89
  16  12  -6  -39.80   44.70
 -16  12   6   61.79   50.79
 -14 -12   6 -115.09   61.79
  14 -12  -6   80.59   58.69
 -14  12   6   68.09   49.10
  14  12  -6  -30.40   43.50
 -12 -12   6 -126.29   61.69
  12 -12  -6  135.49   59.79
  12  12  -6  -55.89   38.40
 -12  12   6   60.49   47.40
  10 -12  -6  159.78   61.99
 -10 -12   6 -106.89   60.49
  10  12  -6   -6.30   34.10
 -10  12   6   48.60   46.10
  -8 -12   6  -60.39   63.69
   8  12  -6  -12.90   31.10
  -8  12   6   49.40   51.49
  -6 -12   6 -150.58   64.59
  -6  12   6    8.30   37.60
   6  12  -6   -5.70   30.10
  -4 -12   6  -63.09   64.29
  -4  12   6  -29.70   38.00
   4  12  -6  -32.80   29.60
  -2 -12   6   -2.00   71.09
   2  12  -6  -23.50   27.50
  -2  12   6  -63.09   36.50
   0 -12   6  -16.80   66.49
   0  12  -6   51.19   32.70
   0  12   6   -5.10   40.60
   2 -12   6  -45.10   68.49
  -2  12  -6    2.40   26.90
   2  12   6  -33.20   40.60
   4 -12   6   26.40   74.29
  -4  12  -6  -25.20   26.50
   4  12   6  -24.80   43.50
   6 -12   6  -42.20   68.89
  -6  12  -6   10.90   27.10
   6  12   6  -48.00   44.40
   8 -12   6  122.09   73.09
   8  12   6    3.20   49.20
  10 -12   6   22.40   70.99
 -10  12  -6   -3.20   52.59
  10  12   6  -37.90   51.29
 -15 -13   6 -133.49   66.69
  15 -13  -6  161.78   64.49
  15  13  -6  -82.69   46.80
 -15  13   6  116.99   56.19
  13 -13  -6  149.49   65.09
  13  13  -6  -39.00   45.60
 -13  13   6   17.70   50.29
 -11 -13   6 -156.18   67.39
  11  13  -6  -52.89   36.80
 -11  13   6   70.09   50.29
  -9 -13   6 -137.59   68.49
   9  13  -6  -32.60   33.90
   7  13  -6  -70.49   29.40
  -5 -13   6 -121.59   70.69
   5  13  -6   11.50   34.00
  -5  13   6  -78.49   38.50
  -3 -13   6 -114.09   67.29
   3  13  -6  -26.20   31.00
  -3  13   6 -100.19   38.60
  -1 -13   6 -118.19   72.89
   1  13  -6  -38.10   29.70
  -1  13   6 -122.99   38.70
   1 -13   6  -47.40   72.49
   1  13   6  -41.90   41.90
  -1  13  -6   -3.10   33.00
   3 -13   6   23.90   74.59
  -3  13  -6    6.40   31.00
   3  13   6  -43.00   44.70
   5 -13   6   34.20   75.69
   5  13   6   -8.80   46.10
  -5  13  -6   80.99   35.60
   7 -13   6   91.09   78.79
   7  13   6  -23.00   49.10
  10  14  -6  -53.49   38.60
   8  14  -6  -66.59   35.00
  -6 -14   6  -68.09   73.69
   6  14  -6  -23.30   36.30
  -4 -14   6 -135.89   75.99
   4  14  -6    3.10   37.70
  -4  14   6 -111.29   40.40
  -2 -14   6  -23.20   80.19
   2  14  -6  -28.50   33.50
  -2  14   6  -88.49   42.20
   0 -14   6  -92.59   76.09
   0  14  -6   -4.00   34.20
   0  14   6 -123.39   43.00
   2 -14   6   36.70   77.19
   2  14   6  -41.80   47.80
  -2  14  -6  -38.30   33.30
   4 -14   6   27.30   84.99
   4  14   6  -53.19   49.80
  -4  14  -6  -12.40   35.30
 -28   0   7    5.90   45.10
 -28   0   7   26.00   36.10
 -26   0   7   13.20   31.50
 -26   0   7   16.40   42.30
 -24   0   7   11.10   37.60
 -24   0   7  -37.50   25.40
 -22   0   7    6.00   24.90
 -22   0   7   19.20   33.30
 -20   0   7    5.00   28.80
 -20   0   7    0.60   22.70
 -18   0   7  -12.70   18.60
 -18   0   7  -15.90   22.20
 -16   0   7   19.70   18.10
 -16   0   7   -4.10   21.00
 -14   0   7    9.80   15.50
 -14   0   7    1.00   20.90
 -12   0   7   23.80   19.90
  10   0  -7   26.90    9.70
 -10   0   7   38.70   19.40
   8   0  -7    3.60    8.60
  -8   0   7   19.00   16.10
  -6   0   7  -12.40   13.00
   6   0  -7   -8.10    8.40
  -4   0   7   15.80   13.10
   4   0  -7    8.70    9.30
  -2   0   7   24.20   11.50
   2   0  -7   12.30    9.60
   0   0  -7   28.20   12.60
   0   0   7   41.90   14.50
  -2   0  -7   13.00   11.50
   2   0   7    2.90   12.00
   4   0   7   24.20   16.20
  -4   0  -7   16.10   14.60
   6   0   7  -22.00   14.10
  -6   0  -7   14.80   14.80
   8   0   7  -19.10   17.80
  -8   0  -7    2.60   16.10
 -10   0  -7   34.40   17.70
 -10   0  -7    4.30   19.60
  10   0   7    2.10   22.60
  10   0   7   14.80   24.40
  12   0   7    8.70   26.80
  12   0   7   14.40   27.00
 -12   0  -7    6.10   21.80
 -12   0  -7    9.20   19.60
  14   0   7   17.40   30.30
 -14   0  -7   -7.10   25.00
  16   0   7   68.99   34.50
 -29  -1   7  -26.50   35.50
 -29  -1   7   27.80   48.40
 -29   1   7    9.50   36.70
 -29   1   7   75.29   53.79
 -27  -1   7  -45.90   40.50
 -27  -1   7  -46.90   30.60
 -27   1   7    8.80   32.40
 -27   1   7   12.30   44.30
 -25  -1   7   16.60   32.70
 -25  -1   7   -1.00   37.40
 -25   1   7   35.40   38.90
 -25   1   7   43.40   31.20
 -23  -1   7  106.99   29.70
 -23  -1   7  125.79   43.00
 -23   1   7  116.89   31.50
 -23   1   7   61.89   40.10
 -21  -1   7  101.49   39.20
 -21  -1   7   82.29   26.70
 -21   1   7   98.89   36.30
 -21   1   7  104.09   28.10
 -19  -1   7   56.99   30.80
 -19  -1   7   57.59   22.70
 -19   1   7   59.89   23.30
 -19   1   7  107.09   34.10
 -17  -1   7   -8.10   17.40
 -17  -1   7   30.10   24.30
 -17   1   7   14.30   25.60
 -17   1   7   -9.80   18.60
 -15  -1   7  405.26   30.60
 -15  -1   7  418.46   44.50
 -15   1   7  394.26   45.00
 -13  -1   7  749.42   49.40
 -13  -1   7  745.43   32.90
 -13   1   7  709.63   48.10
  13   1  -7  759.02   27.80
 -11  -1   7 1580.94   60.29
 -11  -1   7 1615.84   39.40
 -11   1   7 1538.25   59.29
  11   1  -7 1555.14   37.10
  -9  -1   7  812.82   44.30
   9  -1  -7  803.92   26.50
   9   1  -7  818.92   29.30
  -9   1   7  822.62   42.30
   7  -1  -7  361.86   21.50
  -7  -1   7  332.07   32.70
  -7   1   7  338.87   23.10
   7   1  -7  328.57   22.70
  -7   1   7  340.17   29.10
   5  -1  -7   88.09   14.80
  -5  -1   7  107.39   21.40
  -5   1   7   85.39   15.00
   5   1  -7  105.49   15.20
  -5   1   7  128.49   18.50
   3  -1  -7  197.08   21.60
  -3  -1   7  221.08   28.70
   3   1  -7  219.28   21.80
  -3   1   7  213.78   23.70
   1  -1  -7 1481.15   45.20
  -1  -1   7 1541.45   45.50
  -1   1   7 1567.04   47.00
   1   1  -7 1567.84   43.40
   1  -1   7 1104.99   41.20
  -1  -1  -7 1091.59   42.50
   1   1   7 1124.09   44.20
  -1   1  -7 1110.79   39.60
  -3  -1  -7  285.87   28.90
   3  -1   7  311.67   28.30
   3  -1   7  315.47   31.90
  -3   1  -7  344.07   28.20
   3   1   7  317.67   32.30
  -3   1  -7  292.07   24.20
   5  -1   7   60.99   21.40
   5  -1   7   48.10   16.80
  -5  -1  -7   54.39   17.70
  -5   1  -7   31.50   14.50
   5   1   7   36.20   18.10
  -5   1  -7   46.60   15.50
   7  -1   7  104.79   26.60
   7  -1   7   60.49   19.60
  -7  -1  -7   81.49   20.70
  -7   1  -7   63.59   19.10
   7   1   7   80.49   23.30
  -7   1  -7   88.89   20.50
   9  -1   7  269.27   37.20
   9  -1   7  281.17   34.30
  -9  -1  -7  336.67   37.40
   9   1   7  291.17   36.40
  -9   1  -7  250.67   31.60
  -9   1  -7  273.47   32.60
 -11  -1  -7  197.98   32.50
  11  -1   7  152.28   31.90
  11  -1   7  173.88   37.00
 -11   1  -7  172.68   29.50
  11   1   7  234.28   36.90
 -11   1  -7  217.58   32.40
  13  -1   7  213.38   42.20
  13  -1   7  292.77   40.60
 -13   1  -7  211.58   35.10
  13   1   7  266.77   43.60
 -13   1  -7  221.88   36.20
  15  -1   7   76.79   41.90
  15  -1   7   43.50   32.00
 -15   1  -7   27.70   27.00
  15   1   7   28.60   31.30
  17  -1   7  -28.10   41.50
  17   1   7   77.19   38.00
 -28  -2   7   25.80   34.10
 -28  -2   7   29.40   50.09
 -28   2   7  -25.50   48.30
 -26  -2   7   23.40   43.40
 -26  -2   7   29.60   31.70
 -26   2   7   31.90   43.50
 -24  -2   7   64.59   42.10
 -24   2   7   19.50   38.10
 -22  -2   7  227.38   47.30
 -22   2   7  169.18   42.50
 -20  -2   7  194.38   43.40
 -20   2   7  154.48   40.20
 -18  -2   7   37.00   27.60
 -18   2   7   17.70   28.80
 -16  -2   7   94.79   28.70
 -16   2   7  116.99   33.40
  16   2  -7  107.69   18.00
 -14  -2   7  718.23   52.69
 -14   2   7  708.13   51.19
  14   2  -7  774.82   31.50
 -12  -2   7 2688.33   80.89
 -12  -2   7 2615.94   47.70
  12   2  -7 2627.74   50.39
 -12   2   7 2651.33   77.99
 -10  -2   7 2217.98   70.79
 -10   2   7 2278.07   67.49
  10   2  -7 2259.87   47.20
   8  -2  -7  732.33   28.20
  -8  -2   7  685.13   44.30
  -8   2   7  672.03   38.10
   8   2  -7  672.93   30.50
  -8   2   7  694.43   29.70
   6  -2  -7   92.59   15.90
  -6  -2   7  137.29   25.30
  -6   2   7   73.69   17.00
  -6   2   7  148.59   21.00
   6   2  -7   95.99   15.50
  -4  -2   7  264.67   33.60
   4  -2  -7  248.88   24.30
  -4   2   7  269.27   26.80
   4   2  -7  245.08   23.20
  -2  -2   7  944.01   44.30
   2  -2  -7  956.30   39.00
   2   2  -7  911.91   35.60
  -2   2   7  896.01   39.30
   0  -2   7 1279.07   48.60
   0  -2  -7 1284.97   46.70
   0   2  -7 1304.37   42.90
   0   2   7 1258.77   47.10
   2  -2   7  337.07   37.10
  -2  -2  -7  359.76   31.80
   2   2   7  325.17   34.30
  -2   2  -7  332.07   28.10
   4  -2   7  206.98   31.20
  -4  -2  -7  207.78   28.30
  -4   2  -7  219.28   27.20
  -4   2  -7  248.58   26.80
   4   2   7  218.18   30.80
   6  -2   7  224.88   27.80
   6  -2   7  200.98   32.50
  -6  -2  -7  200.88   28.80
  -6   2  -7  218.78   29.10
   6   2   7  211.58   30.10
  -6   2  -7  184.58   25.30
   8  -2   7  369.56   49.20
   8  -2   7  375.76   38.20
  -8  -2  -7  387.46   37.80
   8   2   7  374.56   42.80
  -8   2  -7  407.86   35.60
  -8   2  -7  347.67   37.40
  10  -2   7  327.87   38.50
  10  -2   7  369.36   47.90
  10   2   7  338.57   40.20
 -10   2  -7  297.67   39.30
 -10   2  -7  331.67   37.90
  12  -2   7  388.06   44.40
  12  -2   7  372.26   50.69
 -12   2  -7  373.06   41.80
  12   2   7  450.05   48.50
 -12   2  -7  385.56   44.00
  14  -2   7   78.59   31.40
  14  -2   7  133.79   39.40
 -14   2  -7   99.29   31.20
 -14   2  -7   81.89   28.50
  14   2   7   98.79   38.40
  16  -2   7   44.80   32.50
  16  -2   7  134.29   40.50
 -16   2  -7   73.29   33.10
  16   2   7   65.99   37.60
  18   2   7   93.19   40.80
 -27  -3   7   22.30   46.00
 -27   3   7   47.90   45.20
 -25  -3   7   11.50   44.10
 -25   3   7  -60.39   36.70
 -23  -3   7    3.60   37.50
 -23   3   7    0.70   34.70
 -21  -3   7   -4.20   33.50
 -21   3   7   35.00   32.60
 -19  -3   7    5.20   30.70
 -19   3   7   -8.40   25.90
 -17  -3   7    3.60   27.60
  17   3  -7  -15.10   18.40
 -17   3   7    0.00   25.70
 -15  -3   7   98.79   30.50
 -15   3   7  164.18   34.00
  15   3  -7  127.39   20.70
 -13  -3   7  232.58   37.70
 -13   3   7  233.88   36.40
  13   3  -7  235.58   26.40
 -11  -3   7 1184.28   59.99
  11   3  -7 1171.38   39.00
 -11   3   7 1206.98   56.69
  -9  -3   7  136.09   30.20
  -9   3   7  201.28   29.70
   9   3  -7  223.88   24.90
  -7  -3   7  126.69   27.60
   7   3  -7   77.89   16.40
  -7   3   7  106.49   21.50
  -5  -3   7   83.19   26.00
   5  -3  -7   69.19   16.20
   5   3  -7   88.09   17.00
  -5   3   7   98.39   18.90
   3  -3  -7   58.39   16.90
  -3  -3   7   96.49   26.50
  -3   3   7   46.10   17.70
   3   3  -7   91.49   16.40
  -1  -3   7  264.07   33.10
   1  -3  -7  179.58   23.90
  -1   3   7  224.48   27.20
   1   3  -7  270.37   26.20
  -1  -3  -7   35.80   16.40
   1  -3   7  117.49   29.40
   1   3   7   97.49   23.70
  -1   3  -7   75.39   16.00
   3  -3   7  146.69   31.60
  -3   3  -7  126.29   24.10
   3   3   7  134.49   26.50
  -3   3  -7  149.29   21.40
   5  -3   7   -6.50   26.70
   5   3   7    0.10   19.70
  -5   3  -7    1.50   17.60
  -5   3  -7   30.70   14.80
   7  -3   7   82.89   21.80
   7  -3   7   47.10   33.40
   7   3   7   63.89   25.60
  -7   3  -7   66.99   20.20
  -7   3  -7  100.89   27.00
   9  -3   7   52.59   23.80
   9  -3   7   85.89   40.10
   9   3   7   37.40   28.40
  -9   3  -7   25.60   18.60
  -9   3  -7   28.10   22.90
  11  -3   7   70.59   28.20
  11  -3   7   58.99   39.80
  11   3   7   45.20   32.80
 -11   3  -7   12.30   21.80
 -11   3  -7   54.59   27.30
  13  -3   7  153.78   34.70
  13  -3   7  111.69   41.80
 -13   3  -7   74.39   27.70
 -13   3  -7  158.78   35.50
  13   3   7  116.29   40.40
  15  -3   7   47.10   30.60
  15  -3   7  142.19   43.30
  15   3   7   29.10   36.90
 -15   3  -7   64.79   30.90
 -15   3  -7   25.40   27.20
  17  -3   7   50.29   39.50
 -17   3  -7    7.40   27.90
  17   3   7  -39.30   38.40
  19   3   7   25.40   44.60
 -28  -4   7   16.90   51.79
 -28   4   7    1.50   49.70
 -26  -4   7  107.99   52.69
 -26   4   7   48.40   48.60
 -24  -4   7   59.79   43.80
 -24   4   7   26.80   39.60
 -22  -4   7  108.89   45.20
 -22   4   7  101.79   42.20
 -20  -4   7   43.80   36.70
 -20   4   7   39.20   34.80
 -18  -4   7   28.90   33.30
 -18   4   7  100.79   35.70
  18   4  -7   29.20   24.90
 -16  -4   7   -5.00   27.30
  16   4  -7  -21.90   19.00
 -16   4   7  -16.60   24.70
 -14  -4   7    3.70   26.60
  14   4  -7    0.50   17.70
 -14   4   7    7.70   23.30
 -12  -4   7   32.30   27.40
  12   4  -7   44.00   17.70
 -12   4   7   49.00   25.40
 -10  -4   7  703.63   52.79
 -10   4   7  737.43   47.30
  10   4  -7  698.53   35.60
  -8  -4   7   79.89   30.10
   8   4  -7   53.49   16.30
  -8   4   7   65.79   16.40
  -8   4   7   52.89   22.00
  -6  -4   7   72.99   31.50
  -6   4   7   67.29   17.90
   6   4  -7   88.49   17.80
  -6   4   7   78.79   19.70
  -4  -4   7  463.15   50.49
  -4   4   7  468.55   35.00
   4   4  -7  439.86   31.30
  -2  -4   7  232.18   37.30
   2   4  -7  227.98   25.90
  -2   4   7  251.87   29.20
   0  -4   7 1061.89   60.19
   0   4   7 1050.39   49.10
   0   4  -7 1126.49   42.90
   2  -4   7  387.96   50.39
  -2   4  -7  415.96   31.20
   2   4   7  332.87   38.70
   4  -4   7  132.89   35.50
  -4   4  -7  151.98   28.90
  -4   4  -7  143.89   21.60
   4   4   7   99.39   25.10
   6  -4   7   14.70   34.70
  -6   4  -7   70.89   24.80
  -6   4  -7   32.50   16.70
   6   4   7   24.80   25.10
   8  -4   7   52.19   38.60
  -8   4  -7   47.30   19.90
  -8   4  -7   59.69   27.20
   8   4   7   17.40   29.30
  10  -4   7  136.29   31.30
  10  -4   7  100.09   46.00
 -10   4  -7  148.49   34.20
 -10   4  -7  118.59   26.90
  10   4   7  151.68   39.20
  12  -4   7   44.00   27.60
  12  -4   7    1.70   42.80
 -12   4  -7  -14.60   19.70
 -12   4  -7    3.30   25.50
  12   4   7   61.99   38.00
  14  -4   7    6.20   28.00
  14  -4   7   67.39   41.40
 -14   4  -7   18.70   25.90
  14   4   7   10.10   37.30
 -14   4  -7   11.30   29.00
  16  -4   7   79.89   45.40
  16   4   7   18.90   41.80
 -16   4  -7   -4.70   31.50
  18  -4   7   80.69   45.10
  18   4   7  -67.29   42.40
 -18   4  -7   23.30   37.80
  20   4   7  -42.20   45.90
 -27  -5   7   -1.40   48.80
 -27   5   7   27.80   48.50
 -25  -5   7  161.08   57.19
 -25   5   7  135.19   51.29
 -23  -5   7  227.58   56.29
 -23   5   7  167.98   49.20
 -21  -5   7  355.26   60.19
 -21   5   7  222.58   50.99
 -19  -5   7  147.29   46.90
  19   5  -7  162.08   33.20
 -19   5   7  153.18   43.10
 -17  -5   7   -4.50   33.50
  17   5  -7   17.80   24.90
 -17   5   7   11.10   30.20
 -15  -5   7   18.80   31.10
  15   5  -7   21.80   22.00
 -15   5   7   -1.20   26.70
 -13  -5   7  249.88   43.30
 -13   5   7  245.98   40.00
  13   5  -7  290.07   32.30
 -11  -5   7  251.37   41.50
 -11   5   7  265.07   38.20
  11   5  -7  248.98   28.50
  -9  -5   7  956.70   63.39
  -9   5   7 1020.20   52.39
   9   5  -7  979.20   42.70
  -7  -5   7   80.99   35.60
  -7   5   7   88.19   22.20
   7   5  -7   84.69   19.00
  -7   5   7   53.79   19.30
  -5  -5   7   48.40   34.10
   5   5  -7   46.00   16.40
  -5   5   7   28.80   19.50
  -3  -5   7 1005.80   64.69
   3   5  -7 1034.90   42.70
  -3   5   7 1013.40   46.80
  -1  -5   7 1630.94   73.49
   1   5  -7 1669.33   51.09
  -1   5   7 1652.13   58.29
   1  -5   7 1091.49   68.79
   1   5   7 1152.08   54.59
  -1   5  -7 1136.59   45.90
   3  -5   7  707.23   63.69
  -3   5  -7  569.64   37.00
   3   5   7  641.04   48.80
  -3   5  -7  614.24   45.70
   5  -5   7   72.39   41.80
  -5   5  -7   44.60   19.10
   5   5   7   42.40   28.10
  -5   5  -7   50.99   25.10
   7  -5   7   34.80   44.80
  -7   5  -7   10.60   23.70
  -7   5  -7   -3.80   16.50
   7   5   7   18.10   28.20
   9  -5   7  523.65   65.59
  -9   5  -7  546.05   43.90
   9   5   7  588.44   62.29
  -9   5  -7  483.35   53.39
  -9   5  -7  506.15   38.60
  11  -5   7   14.80   26.10
  11  -5   7   22.30   47.90
  11   5   7    9.20   37.50
 -11   5  -7    4.00   23.90
 -11   5  -7   23.40   29.80
 -11   5  -7   -6.60   20.50
  13  -5   7  204.98   36.90
  13  -5   7  217.98   56.19
  13   5   7  250.97   50.69
 -13   5  -7  208.58   43.90
 -13   5  -7  183.28   34.60
 -13   5  -7  225.18   35.80
  15  -5   7   65.99   52.39
 -15   5  -7  -12.40   31.50
 -15   5  -7    0.00   30.00
  15   5   7    6.50   41.90
  17  -5   7  142.69   50.29
 -17   5  -7   -1.20   34.70
 -17   5  -7   33.60   37.00
  17   5   7    6.90   47.60
  19  -5   7  164.88   50.29
 -19   5  -7   63.69   41.80
  19   5   7    0.60   46.40
 -19   5  -7   21.50   40.80
 -26  -6   7   48.10   53.09
 -26   6   7   94.19   54.79
 -24  -6   7   24.20   49.99
 -24   6   7   28.40   43.30
 -22  -6   7  151.58   56.39
 -22   6   7  130.09   47.10
 -20  -6   7  101.49   48.90
 -20   6   7  189.18   48.90
  20   6  -7  141.09   36.50
 -18  -6   7  -11.00   38.20
  18   6  -7   66.49   32.20
 -18   6   7   16.00   34.20
 -16  -6   7    8.00   36.70
 -16   6   7    1.90   32.60
  16   6  -7    5.40   26.60
 -14  -6   7   82.49   39.60
 -14   6   7   53.09   31.90
  14   6  -7   79.79   28.10
 -12  -6   7  124.19   39.20
 -12   6   7  187.68   37.60
  12   6  -7   93.09   26.00
 -10  -6   7  332.47   48.80
 -10   6   7  362.76   43.50
  10   6  -7  364.26   37.30
  -8  -6   7  145.39   43.10
   8   6  -7  154.28   24.20
  -8   6   7  153.58   24.50
  -8   6   7  200.58   30.90
  -6  -6   7  113.09   39.80
  -6   6   7  139.09   25.40
   6   6  -7   98.59   21.30
  -6   6   7  142.39   24.00
  -4  -6   7   28.00   37.80
   4   6  -7   30.90   16.90
  -4   6   7   37.80   23.50
  -2  -6   7 1144.29   74.19
  -2   6   7 1064.49   52.79
   2   6  -7 1128.89   46.00
   0  -6   7  538.05   67.69
   0   6  -7  471.05   35.90
   0   6   7  456.65   48.30
   2  -6   7  270.37   50.19
   2   6   7  353.76   41.80
  -2   6  -7  398.76   34.60
   4  -6   7  237.28   53.39
   4   6   7  303.97   41.60
  -4   6  -7  291.97   40.70
  -4   6  -7  242.28   28.50
   6  -6   7   20.80   49.70
   6   6   7   35.70   33.20
  -6   6  -7   86.79   31.00
  -6   6  -7   55.99   20.20
   8  -6   7   -3.60   51.99
  -8   6  -7    3.10   19.30
   8   6   7    3.30   36.70
  -8   6  -7   34.40   30.70
  10  -6   7  156.58   60.39
 -10   6  -7  127.29   25.60
  10   6   7  112.89   43.80
 -10   6  -7  158.48   28.50
 -10   6  -7  163.18   43.40
  12  -6   7   39.50   51.79
  12  -6   7   60.39   29.10
  12   6   7   82.79   44.10
 -12   6  -7   41.60   37.30
 -12   6  -7   39.20   27.10
 -12   6  -7   13.50   24.00
  14  -6   7   35.20   52.39
  14   6   7   12.80   44.30
 -14   6  -7   11.60   37.90
 -14   6  -7    1.10   34.70
  16  -6   7  106.89   57.99
 -16   6  -7  -12.20   39.10
  16   6   7    9.40   44.90
  18  -6   7   87.79   54.09
 -18   6  -7   40.00   44.00
  18   6   7  -11.30   48.50
 -25  -7   7  -17.20   50.69
 -25   7   7   22.40   48.20
 -23  -7   7  -83.09   44.40
 -23   7   7   51.29   44.20
 -21  -7   7  -66.49   46.60
  21   7  -7  -39.80   35.10
 -21   7   7   72.19   41.90
 -19  -7   7    4.70   46.20
 -19   7   7   12.70   37.40
  19   7  -7  -21.60   33.50
 -17  -7   7  -22.10   41.00
 -17   7   7   32.60   38.90
  17   7  -7  -22.20   31.20
 -15  -7   7  102.19   47.50
  15   7  -7  -14.70   28.30
 -15   7   7   96.39   41.40
 -13  -7   7  207.28   50.49
 -13   7   7  187.58   42.70
  13   7  -7  207.98   36.10
 -11  -7   7   30.50   41.80
 -11   7   7   21.80   27.20
  11   7  -7  -23.20   22.30
  -9  -7   7   25.60   41.60
  -9   7   7   32.50   25.80
   9   7  -7  -18.60   19.60
  -9   7   7  -20.50   20.70
  -7  -7   7   24.00   42.30
   7  -7  -7   39.60   33.50
   7   7  -7   12.90   19.80
  -7   7   7   34.10   25.00
  -7   7   7   32.60   22.80
  -5  -7   7   33.00   45.30
  -5   7   7   -4.60   18.80
  -5   7   7    3.50   25.70
   5   7  -7   -7.70   16.20
  -3  -7   7   68.89   46.90
  -3   7   7    7.00   27.30
   3   7  -7    4.10   17.40
  -1  -7   7  -20.40   45.60
  -1   7   7   62.49   31.70
   1   7  -7   24.10   18.00
   1  -7   7   18.30   48.00
   1   7   7   38.20   32.50
  -1   7  -7   18.90   18.60
   3  -7   7    6.30   50.19
   3   7   7   10.00   34.00
  -3   7  -7   45.60   21.00
   5  -7   7  -76.49   49.40
  -5   7  -7   38.80   31.30
   5   7   7  -13.10   36.20
  -5   7  -7   -2.90   18.70
   7  -7   7   40.90   61.39
   7   7   7   96.69   41.70
  -7   7  -7   63.39   23.00
  -7   7  -7   97.59   37.90
   9  -7   7  100.19   61.89
   9   7   7  166.88   45.60
  -9   7  -7  142.89   27.90
  -9   7  -7  196.98   47.70
  11  -7   7  136.09   60.99
 -11   7  -7   58.79   25.70
 -11   7  -7   84.49   40.60
  11   7   7   82.39   44.00
  13  -7   7  109.39   60.59
  13   7   7  -12.40   45.10
 -13   7  -7   17.30   39.80
  15  -7   7   84.09   63.19
 -15   7  -7   -3.40   39.70
  15   7   7   -5.90   47.50
  17  -7   7   97.49   60.49
 -17   7  -7   51.39   46.60
  17   7   7   22.60   52.59
 -24  -8   7   10.20   57.49
 -24   8   7   43.00   48.40
 -22  -8   7  -57.59   50.69
 -22   8   7   67.69   48.00
 -20  -8   7  -10.60   51.19
  20   8  -7    1.00   38.60
 -20   8   7   67.39   45.00
 -18  -8   7  -53.29   45.30
  18   8  -7  -38.00   35.00
 -18   8   7  -18.90   36.90
 -16  -8   7   22.40   49.80
 -16   8   7   34.40   39.20
  16   8  -7  -25.90   33.70
 -14  -8   7  159.08   53.49
 -14   8   7  127.29   43.00
  14   8  -7  175.18   38.80
 -12  -8   7  940.11   87.19
  12  -8  -7  923.81   80.39
 -12   8   7  995.40   66.99
  12   8  -7 1025.10   60.49
 -10  -8   7   -2.20   47.50
  10  -8  -7   11.40   41.40
 -10   8   7    7.50   29.60
  10   8  -7   43.30   26.30
  -8  -8   7   63.09   48.90
   8  -8  -7  138.89   44.50
  -8   8   7   54.19   28.30
  -8   8   7   58.39   27.00
   8   8  -7   71.19   26.10
   6  -8  -7   -7.20   36.80
  -6  -8   7  -32.10   49.30
   6   8  -7   -6.50   19.50
  -6   8   7   -2.20   23.30
  -6   8   7   12.80   27.00
  -4  -8   7  121.49   54.39
  -4   8   7   99.09   33.50
   4   8  -7   36.60   22.00
  -2  -8   7   35.00   51.99
   2   8  -7   98.29   25.00
  -2   8   7   84.89   34.90
   0  -8   7  104.69   57.69
   0   8   7  101.09   38.30
   0   8  -7   83.79   23.70
   2  -8   7   81.69   58.09
   2   8   7   74.59   38.40
  -2   8  -7   53.79   23.00
   4  -8   7  -48.60   55.99
  -4   8  -7  -15.80   20.00
   4   8   7   41.40   39.60
   6  -8   7  -17.80   58.99
   6   8   7   85.29   41.90
  -6   8  -7   54.19   36.90
  -6   8  -7   29.60   23.00
   8  -8   7   19.90   59.49
  -8   8  -7  -10.60   19.70
  -8   8  -7   33.20   40.70
   8   8   7   27.10   40.00
  10  -8   7  215.08   66.19
 -10   8  -7   79.39   26.20
 -10   8  -7   59.39   40.70
  10   8   7   53.19   43.10
  12  -8   7  218.38   71.99
  12   8   7   84.59   50.89
 -12   8  -7  141.29   49.00
  14  -8   7  198.38   71.09
 -14   8  -7   63.09   48.60
  14   8   7   46.50   51.39
  16  -8   7  135.59   65.29
 -16   8  -7   59.29   47.10
  16   8   7  -11.90   53.09
 -23  -9   7  -12.00   59.99
 -23   9   7   86.49   53.59
 -21  -9   7   15.70   60.99
  21   9  -7  -42.70   46.20
 -21   9   7  147.09   53.59
 -19  -9   7   -7.30   53.39
 -19   9   7   54.09   44.40
  19   9  -7    3.80   41.70
 -17  -9   7  -44.70   49.70
  17  -9  -7   29.00   50.29
  17   9  -7  -55.39   36.00
 -17   9   7   25.50   38.30
 -15  -9   7  -58.19   50.69
  15  -9  -7   14.60   45.80
  15   9  -7  -36.00   33.90
 -15   9   7   86.99   39.60
 -13  -9   7  369.06   66.49
  13  -9  -7  565.84   73.69
 -13   9   7  302.27   50.99
  13   9  -7  407.16   48.00
 -11  -9   7  158.28   60.39
  11  -9  -7  187.68   54.29
 -11   9   7  247.38   44.40
  11   9  -7  178.88   36.90
   9  -9  -7  273.57   52.99
  -9  -9   7  160.78   63.79
   9   9  -7  281.57   38.80
  -9   9   7  267.27   42.40
  -7  -9   7  -29.80   54.79
   7  -9  -7  -23.30   47.00
   7   9  -7   17.40   24.40
  -7   9   7  -22.40   31.50
  -7   9   7    2.30   31.20
  -5  -9   7  -19.50   56.09
  -5   9   7   31.00   32.50
  -5   9   7   26.60   31.50
   5   9  -7   29.90   23.00
  -3  -9   7   12.10   58.49
   3   9  -7   46.20   24.30
  -3   9   7   80.49   36.40
  -1  -9   7  256.27   67.59
  -1   9   7  257.77   45.10
   1   9  -7  230.58   33.20
   1  -9   7   73.79   64.99
   1   9   7   89.29   41.50
  -1   9  -7   52.09   25.90
   3  -9   7  -21.40   61.19
   3   9   7  134.69   44.60
  -3   9  -7  104.19   27.00
   5  -9   7   25.40   59.19
   5   9   7    9.30   39.90
  -5   9  -7  -16.30   20.30
   7  -9   7  -42.80   54.99
  -7   9  -7  -23.50   37.80
   7   9   7   12.10   40.60
  -7   9  -7   24.20   23.70
   9  -9   7   92.59   65.79
   9   9   7   28.30   45.80
  -9   9  -7   51.59   44.50
  -9   9  -7   20.90   24.50
  11  -9   7  212.08   73.49
  11   9   7  154.98   54.49
 -11   9  -7  102.49   49.40
  13  -9   7   70.49   67.49
 -13   9  -7   56.79   49.70
  13   9   7   44.50   52.69
  15  -9   7   71.09   67.89
 -15   9  -7   69.59   52.39
  15   9   7   37.30   56.39
 -22 -10   7 -113.59   56.69
  22  10  -7 -133.99   46.20
 -22  10   7   23.50   46.00
  20 -10  -7  228.98   60.49
 -20 -10   7  -33.80   59.39
 -20  10   7   14.40   47.30
  20  10  -7  -75.49   45.10
 -18 -10   7  -48.40   55.19
  18 -10  -7  140.89   56.09
 -18  10   7    9.20   42.70
  18  10  -7  -35.70   43.30
  16 -10  -7   90.19   53.09
 -16 -10   7  -44.10   56.89
 -16  10   7   -6.70   41.50
  16  10  -7  -77.59   34.70
  14 -10  -7   59.89   48.20
 -14 -10   7  -68.29   54.29
 -14  10   7   17.30   37.30
  14  10  -7  -33.00   36.30
 -12 -10   7  -45.10   54.59
  12 -10  -7  113.99   47.70
 -12  10   7   39.30   35.90
  12  10  -7  -31.30   30.50
  10 -10  -7  129.19   49.50
 -10 -10   7   20.20   54.79
  10  10  -7  -14.90   29.30
 -10  10   7  105.89   39.30
   8 -10  -7   51.49   50.49
  -8 -10   7   27.40   57.69
  -8  10   7  -40.60   37.30
   8  10  -7    7.40   30.30
  -8  10   7    5.60   36.30
  -6 -10   7    0.90   60.19
  -6  10   7  -42.70   32.80
   6  10  -7   39.00   29.10
  -4 -10   7  -24.60   60.19
   4  10  -7   19.00   24.40
  -4  10   7    5.10   34.20
  -2 -10   7  -22.60   63.99
  -2  10   7   45.20   37.10
   2  10  -7  -22.90   23.70
   0 -10   7 -141.99   56.69
   0  10  -7   30.20   26.40
   0  10   7   37.10   39.10
   2 -10   7   30.70   61.89
   2  10   7  -22.70   41.40
  -2  10  -7  -27.40   23.10
   4 -10   7  -31.80   59.89
  -4  10  -7   21.20   24.30
   4  10   7  -26.50   40.20
   6 -10   7  106.19   66.39
   6  10   7  -44.00   40.00
  -6  10  -7   16.00   24.70
   8 -10   7   80.19   67.19
  -8  10  -7   24.30   24.50
  -8  10  -7    7.70   45.50
   8  10   7  -81.59   42.30
  10 -10   7   91.39   72.19
  10  10   7   -3.30   48.60
 -10  10  -7   -8.90   45.20
  12 -10   7   85.99   72.39
 -12  10  -7  -34.90   45.70
  12  10   7  -77.99   48.80
  14 -10   7  155.58   77.29
  14  10   7  -67.59   53.79
 -14  10  -7   50.99   52.59
  19 -11  -7  124.99   56.29
 -19 -11   7  -82.99   61.49
  19  11  -7 -132.49   42.30
 -19  11   7   24.30   47.00
  17 -11  -7  114.19   54.39
 -17 -11   7 -122.79   58.39
 -17  11   7   26.10   46.50
  17  11  -7  -67.49   41.40
 -15 -11   7 -126.99   56.29
  15 -11  -7  122.29   52.59
  15  11  -7  -49.80   39.30
 -15  11   7    2.70   42.00
  13 -11  -7  174.28   54.49
 -13 -11   7  -67.29   60.29
  13  11  -7   29.70   38.20
 -13  11   7   97.49   40.60
  11 -11  -7  146.59   55.09
 -11 -11   7    3.00   65.49
 -11  11   7   60.79   41.30
  11  11  -7  -32.00   31.20
  -9 -11   7   42.20   65.99
   9  11  -7   59.99   35.40
  -9  11   7   77.29   43.00
  -7 -11   7  -80.49   57.89
  -7  11   7  -26.20   35.30
   7  11  -7  -11.70   28.70
  -5 -11   7  -52.89   64.29
   5  11  -7  -10.40   29.10
  -5  11   7  -18.30   36.60
  -3 -11   7  -82.69   61.39
  -3  11   7    8.70   36.30
   3  11  -7   16.20   28.50
  -1 -11   7  -23.70   62.99
   1  11  -7  -24.10   26.30
  -1  11   7  -29.60   36.10
   1 -11   7    1.60   66.29
   1  11   7  -24.10   37.00
  -1  11  -7    9.60   26.00
   3 -11   7  -40.00   66.19
   3  11   7  -31.40   40.20
  -3  11  -7  -15.00   25.30
   5 -11   7  -43.20   64.09
   5  11   7 -126.99   40.70
  -5  11  -7  -15.00   24.40
   7 -11   7   57.59   68.29
   7  11   7 -109.69   41.50
  -7  11  -7  -17.10   26.50
   9 -11   7   87.59   71.49
  -9  11  -7  -31.70   47.80
   9  11   7  -50.29   46.70
  11 -11   7  113.79   75.89
  11  11   7 -104.49   48.40
 -11  11  -7  -38.60   53.19
 -18  12   7   22.00   51.29
  16 -12  -7  190.58   60.29
 -16 -12   7 -127.49   63.89
 -16  12   7   15.80   47.60
  16  12  -7  -19.50   45.80
 -14 -12   7  -81.19   63.79
  14 -12  -7  130.69   58.59
 -14  12   7   94.69   51.09
  14  12  -7  -20.00   42.80
 -12 -12   7  -30.50   65.99
  12 -12  -7  204.48   73.69
 -12  12   7  187.38   50.89
  12  12  -7   30.40   41.10
 -10 -12   7  -43.70   63.59
  10  12  -7   67.49   40.10
  -8 -12   7  -80.69   65.79
   8  12  -7   33.00   34.20
  -6 -12   7  -36.90   67.99
   6  12  -7  -12.30   30.30
  -6  12   7  -87.09   36.90
  -4 -12   7  -90.59   64.89
  -4  12   7  -46.60   37.90
   4  12  -7   15.10   30.20
  -2 -12   7   -4.70   71.99
  -2  12   7  -51.09   38.20
   2  12  -7   -6.10   30.80
   0 -12   7   15.70   69.39
   0  12   7   34.00   43.90
   0  12  -7   70.99   32.00
   2 -12   7   16.40   73.79
  -2  12  -7   20.60   28.90
   2  12   7    2.10   43.00
   4 -12   7  -26.60   72.19
  -4  12  -7  -32.40   25.90
   4  12   7  -73.69   43.90
   6 -12   7    2.40   70.99
  -6  12  -7    5.70   27.70
   6  12   7  -49.30   44.40
   8 -12   7   81.39   73.79
   8  12   7  -69.49   47.50
  10 -12   7   29.10   73.89
  10  12   7  -67.89   52.19
 -10  12  -7  -67.49   52.89
 -15  13   7   68.79   52.29
 -13 -13   7 -105.69   71.49
  13  13  -7  -44.90   41.10
 -13  13   7  112.29   85.79
 -11 -13   7  -72.49   68.09
  11  13  -7   -3.00   39.00
  -9 -13   7 -153.18   68.29
   9  13  -7    2.70   36.40
  -7 -13   7  -29.90   71.29
   7  13  -7  -14.90   33.40
  -5  13   7  -85.59   39.50
   5  13  -7  -26.20   31.00
  -3 -13   7  -91.09   71.69
   3  13  -7  -24.00   31.30
  -3  13   7  -51.79   42.90
  -1 -13   7 -106.39   70.89
   1  13  -7  -32.10   29.80
  -1  13   7  -55.39   41.10
   1 -13   7   15.50   74.39
  -1  13  -7    0.90   30.70
   1  13   7  -28.80   44.20
   3 -13   7   55.29   78.39
   3  13   7  -76.69   46.60
  -3  13  -7   13.70   33.20
   5 -13   7   17.40   77.99
  -5  13  -7   50.49   32.50
   5  13   7  -71.79   47.70
   7 -13   7   79.59   82.69
   7  13   7  -80.79   49.00
  10  14  -7  -41.80   38.90
  -8 -14   7 -147.89   73.89
   8  14  -7  -47.50   34.60
  -6 -14   7 -142.89   71.29
   6  14  -7  -53.69   33.50
  -4 -14   7 -161.98   75.79
   4  14  -7  -13.80   31.50
  -2 -14   7  -94.09   76.29
   2  14  -7  -28.70   34.80
  -2  14   7 -101.19   43.70
   0 -14   7  -70.99   80.09
   0  14   7 -121.89   44.90
   0  14  -7  -12.40   32.80
   2 -14   7  -50.69   78.99
  -2  14  -7  -25.10   33.50
   2  14   7  -78.59   48.60
 -28   0   8  134.99   55.19
 -28   0   8   94.39   38.50
 -26   0   8  276.67   60.89
 -26   0   8  316.27   44.50
 -24   0   8  223.88   51.39
 -24   0   8  177.48   34.10
 -22   0   8   80.09   38.70
 -22   0   8   90.89   29.00
 -20   0   8   19.40   30.90
 -20   0   8   -1.00   21.00
 -18   0   8   73.69   23.40
 -18   0   8   34.60   26.40
 -16   0   8   -1.30   23.40
 -14   0   8  226.18   35.80
 -12   0   8   27.40   20.60
 -10   0   8  511.75   40.10
  10   0  -8  491.25   25.60
  -8   0   8 3289.87   73.69
   8   0  -8 3247.97   56.49
  -6   0   8 4903.11   80.49
   6   0  -8 4921.71   70.79
  -4   0   8 4806.42   72.49
   4   0  -8 4766.92   72.89
   2   0  -8 3077.29   61.99
  -2   0   8 3032.40   62.89
   0   0   8 2422.66   59.49
   0   0  -8 2384.46   59.19
   2   0   8   93.39   20.00
  -2   0  -8  103.09   19.60
   4   0   8   28.70   17.40
  -4   0  -8   50.99   17.90
   6   0   8  424.66   39.90
  -6   0  -8  492.25   37.90
  -8   0  -8   35.60   19.30
   8   0   8   16.70   22.40
 -10   0  -8    5.30   20.10
  10   0   8   12.80   26.70
  12   0   8  401.16   48.90
 -12   0  -8  419.56   48.60
 -14   0  -8  397.16   47.80
  14   0   8  386.26   47.40
  16   0   8  573.04   62.59
 -29  -1   8   10.50   50.99
 -29  -1   8   36.80   35.70
 -29   1   8   86.79   54.49
 -27  -1   8  123.29   40.70
 -27   1   8   79.19   47.00
 -27   1   8   89.29   39.80
 -25  -1   8  175.28   40.00
 -25  -1   8  134.39   49.10
 -25   1   8   56.39   34.00
 -25   1   8  108.29   47.40
 -23  -1   8  116.29   32.20
 -23  -1   8  180.58   47.50
 -23   1   8  154.68   33.20
 -23   1   8   74.29   41.10
 -21  -1   8    3.90   22.60
 -21  -1   8  -36.70   28.40
 -21   1   8   19.20   31.50
 -19  -1   8   65.39   23.50
 -19  -1   8   66.89   32.60
 -19   1   8   48.60   31.90
 -17  -1   8   20.90   19.70
 -17  -1   8   39.10   27.00
 -17   1   8   14.80   26.10
 -15  -1   8   18.50   21.50
 -15  -1   8   39.10   16.60
 -15   1   8    4.60   22.40
 -13  -1   8   25.90   23.70
 -13   1   8   15.50   21.20
  13   1  -8   33.70   11.50
 -11  -1   8  301.57   39.00
 -11   1   8  286.97   35.70
  11   1  -8  337.87   24.10
   9  -1  -8 1284.27   35.80
  -9  -1   8 1223.58   53.49
  -9   1   8 1164.88   49.20
  -9   1   8 1187.98   37.20
   9   1  -8 1287.47   38.40
   7  -1  -8 1827.12   44.80
  -7  -1   8 1772.02   57.79
  -7   1   8 1764.62   45.50
   7   1  -8 1842.92   46.30
  -7   1   8 1811.22   52.49
   5  -1  -8 2749.23   57.09
  -5  -1   8 2656.73   63.49
  -5   1   8 2684.13   56.09
  -5   1   8 2699.63   56.69
   5   1  -8 2767.02   56.99
  -3  -1   8 1819.12   52.29
   3  -1  -8 1974.20   51.99
  -3   1   8 1941.11   52.29
   3   1  -8 1970.00   50.59
  -1  -1   8 1972.30   53.19
   1  -1  -8 2132.69   56.89
   1   1  -8 2123.19   53.99
  -1   1   8 2117.19   57.79
  -1  -1  -8  801.82   40.10
   1  -1   8  793.42   40.70
   1  -1   8  764.42   38.20
  -1   1  -8  769.12   37.10
   1   1   8  764.32   41.70
  -3  -1  -8   26.00   16.40
   3  -1   8   59.39   18.00
  -3   1  -8   50.09   16.30
   3   1   8   55.29   19.40
   5  -1   8   23.80   22.30
   5  -1   8   31.80   17.50
  -5  -1  -8   41.00   17.40
   5   1   8   37.10   18.80
  -5   1  -8   58.49   16.90
  -5   1  -8   13.20   14.90
  -7  -1  -8   20.30   16.80
   7  -1   8   18.40   25.40
   7  -1   8   -4.20   18.40
  -7   1  -8   18.50   17.00
  -7   1  -8   30.80   17.10
   7   1   8   26.90   21.50
   9  -1   8   67.49   31.40
  -9  -1  -8   59.19   23.10
   9  -1   8   68.29   28.00
  -9   1  -8   78.19   23.10
  -9   1  -8   94.19   24.00
   9   1   8   66.89   28.80
 -11  -1  -8  126.69   30.30
  11  -1   8  164.88   35.30
  11  -1   8  163.98   38.30
 -11   1  -8  134.69   28.80
  11   1   8  144.09   37.30
 -11   1  -8  121.99   29.80
  13  -1   8  256.77   42.10
 -13   1  -8  318.37   41.20
  13   1   8  360.16   48.30
  15  -1   8  351.26   47.80
  15   1   8  410.26   51.69
 -15   1  -8  282.37   44.10
  17  -1   8  286.17   61.99
  17   1   8  332.57   50.79
 -28  -2   8  -11.10   33.20
 -28  -2   8   18.80   50.09
 -28   2   8   -0.20   46.70
 -26  -2   8   46.30   33.70
 -26  -2   8   31.70   46.10
 -26   2   8   37.50   42.50
 -24  -2   8  -11.40   38.50
 -24  -2   8   -8.90   27.80
 -24   2   8  -12.80   32.90
 -22  -2   8   41.00   38.00
 -22  -2   8   41.50   27.00
 -22   2   8   54.39   35.20
 -20  -2   8  148.59   37.80
 -20  -2   8  113.69   27.80
 -20   2   8  170.88   43.10
 -18  -2   8  433.36   52.89
 -18  -2   8  427.76   35.90
 -18   2   8  391.46   51.69
 -16  -2   8  208.48   38.50
 -16  -2   8  228.68   26.20
 -16   2   8  190.08   37.90
  16   2  -8  159.18   20.20
 -14  -2   8  522.05   48.20
 -14  -2   8  519.45   30.60
 -14   2   8  580.04   49.30
  14   2  -8  532.45   29.60
 -12  -2   8  201.28   34.10
 -12   2   8  217.28   34.00
  12   2  -8  150.88   18.40
 -10  -2   8  385.06   43.00
  10   2  -8  410.26   26.70
 -10   2   8  409.66   37.60
  -8  -2   8   88.99   25.40
   8  -2  -8   92.89   16.10
  -8   2   8  125.29   22.70
  -8   2   8   77.79   17.40
   8   2  -8   81.69   15.60
  -6  -2   8  117.49   25.40
   6  -2  -8  154.48   20.00
  -6   2   8  111.39   20.70
   6   2  -8   86.49   17.60
  -6   2   8  133.99   20.90
   4  -2  -8   33.60   14.70
  -4  -2   8   53.49   22.30
  -4   2   8   12.20   15.90
   4   2  -8   34.20   13.80
  -2  -2   8  491.45   40.90
   2  -2  -8  458.95   33.50
   2   2  -8  406.56   30.20
  -2   2   8  487.55   36.20
   0  -2   8 1007.10   47.90
   0  -2  -8  994.30   45.20
   0   2   8 1023.70   47.10
   0   2  -8 1103.89   42.80
  -2  -2  -8   73.39   19.70
   2  -2   8   72.49   25.40
   2   2   8   78.89   22.10
  -2   2  -8   85.89   17.20
   4  -2   8  573.64   38.00
   4  -2   8  454.25   44.00
  -4  -2  -8  518.05   39.10
  -4   2  -8  493.15   34.50
  -4   2  -8  536.95   35.60
   4   2   8  456.45   41.70
   6  -2   8  387.66   47.40
  -6  -2  -8  437.06   39.50
   6  -2   8  422.56   39.70
  -6   2  -8  422.16   35.80
   6   2   8  409.26   41.40
  -6   2  -8  376.96   35.30
   8  -2   8  413.56   43.70
   8  -2   8  491.65   55.29
  -8  -2  -8  497.95   43.50
  -8   2  -8  435.96   40.60
  -8   2  -8  436.36   39.50
   8   2   8  504.15   50.29
  10  -2   8  282.17   47.60
  10  -2   8  315.97   41.80
 -10   2  -8  262.67   36.70
 -10   2  -8  266.47   35.40
  10   2   8  314.37   43.50
  12  -2   8  151.38   41.90
  12  -2   8  162.18   36.50
  12   2   8  137.79   38.90
 -12   2  -8  134.89   31.40
 -12   2  -8  132.89   32.00
  14  -2   8   28.20   31.80
  14  -2   8   40.00   36.10
  14   2   8   82.89   37.40
 -14   2  -8    8.90   27.00
  16  -2   8   56.29   36.40
  16   2   8  101.79   42.00
 -16   2  -8  102.29   46.30
  18   2   8   64.79   41.60
 -27  -3   8   -8.70   44.10
 -27  -3   8    9.20   33.30
 -27   3   8   -7.60   45.60
 -25  -3   8  -30.10   40.10
 -25   3   8   12.50   42.00
 -23  -3   8   17.30   39.10
 -23   3   8  -13.30   33.50
 -21  -3   8   60.39   38.30
 -21   3   8   46.70   35.00
 -19  -3   8  507.05   58.49
 -19   3   8  351.16   50.89
 -17  -3   8  904.11   66.39
  17   3  -8  868.81   40.90
 -17   3   8  932.41   65.29
 -15  -3   8  757.42   59.89
  15   3  -8  801.32   36.60
 -15   3   8  837.42   59.09
 -13  -3   8 1209.18   65.49
  13   3  -8 1187.78   41.80
 -13   3   8 1231.28   62.99
 -11  -3   8   35.40   26.50
 -11   3   8   19.80   21.30
  11   3  -8   29.90   14.90
  -9  -3   8   32.60   24.50
   9  -3  -8   26.80   13.00
  -9   3   8   35.00   14.60
   9   3  -8   16.90   12.70
  -9   3   8   37.30   20.00
  -7  -3   8   21.00   23.70
   7  -3  -8   38.50   15.40
  -7   3   8   22.60   16.50
  -7   3   8   27.20   16.20
   7   3  -8   17.80   13.30
   5  -3  -8 1682.63   51.69
  -5  -3   8 1615.74   61.69
   5   3  -8 1673.43   48.50
  -5   3   8 1681.83   52.19
  -3  -3   8   83.69   28.70
   3  -3  -8   55.09   18.10
   3   3  -8   87.69   17.70
  -3   3   8   68.09   20.70
  -1  -3   8   -5.80   24.00
   1  -3  -8    7.60   15.80
   1   3  -8   19.50   13.70
  -1   3   8   11.10   19.20
  -1  -3  -8  214.28   28.10
   1  -3   8  220.28   34.80
   1   3   8  168.98   27.10
  -1   3  -8  235.98   26.80
   3  -3   8  496.55   48.40
  -3  -3  -8  541.15   39.70
  -3   3  -8  561.34   36.40
   3   3   8  581.64   44.70
   5  -3   8 1885.21   74.19
  -5   3  -8 1730.53   62.79
   5   3   8 1899.21   67.69
  -5   3  -8 1786.32   58.69
   7  -3   8  929.21   52.59
   7  -3   8  881.21   66.19
  -7   3  -8  895.91   51.99
  -7   3  -8  894.81   47.90
   7   3   8  932.21   57.29
   9  -3   8  537.05   49.60
   9  -3   8  570.14   66.89
  -9   3  -8  514.75   47.50
   9   3   8  515.85   54.09
  -9   3  -8  525.05   44.40
  11  -3   8  307.97   42.60
  11  -3   8  249.38   51.39
 -11   3  -8  243.68   41.80
  11   3   8  277.57   46.10
 -11   3  -8  214.28   35.00
  13  -3   8   33.50   30.60
  13  -3   8   -2.10   36.90
  13   3   8   18.80   35.50
 -13   3  -8    9.90   23.30
 -13   3  -8   36.60   25.60
  15  -3   8   55.09   34.70
  15  -3   8  111.19   41.60
 -15   3  -8   53.29   29.80
 -15   3  -8    6.40   26.90
  15   3   8   99.59   42.10
  17   3   8   60.69   41.90
  19   3   8    4.10   45.70
 -28  -4   8   39.80   50.89
 -28   4   8   26.80   50.09
 -26  -4   8  -17.60   42.50
 -26   4   8   20.50   44.10
 -24  -4   8   30.10   42.90
 -24   4   8  -35.30   34.20
 -22  -4   8    3.30   36.80
 -22   4   8  -22.70   35.10
 -20  -4   8  122.19   44.00
 -20   4   8   63.29   35.90
 -18  -4   8  343.07   52.39
  18   4  -8  392.96   39.30
 -18   4   8  436.76   56.79
 -16  -4   8  333.37   49.50
 -16   4   8  351.86   47.70
  16   4  -8  324.67   35.30
 -14  -4   8  872.41   64.29
 -14   4   8  915.81   60.79
  14   4  -8  897.31   43.20
 -12  -4   8   47.70   30.00
  12   4  -8   86.59   19.50
 -12   4   8  113.89   29.50
 -10  -4   8  153.58   34.80
  10   4  -8  178.98   23.00
 -10   4   8  123.89   29.10
  -8  -4   8  198.18   36.80
  -8   4   8  206.18   29.10
   8   4  -8  161.78   21.50
  -8   4   8  189.68   22.20
  -6  -4   8  600.54   53.99
  -6   4   8  512.35   35.70
   6   4  -8  529.85   33.70
  -4  -4   8  675.83   55.89
  -4   4   8  748.23   41.60
   4   4  -8  650.13   35.40
  -2  -4   8  871.11   58.59
  -2   4   8  888.71   47.00
   2   4  -8  927.41   41.60
   0  -4   8   -8.60   28.60
   0   4  -8    6.20   14.00
   0   4   8   20.30   20.80
   2  -4   8  369.86   45.90
   2   4   8  326.37   36.00
  -2   4  -8  325.17   31.50
   4  -4   8  549.25   59.29
  -4   4  -8  608.64   45.70
  -4   4  -8  588.24   40.30
   4   4   8  578.84   48.60
   6  -4   8 1256.57   78.59
   6   4   8 1291.07   64.09
  -6   4  -8 1290.37   62.09
  -6   4  -8 1333.37   55.09
   8  -4   8  299.07   37.60
   8  -4   8  268.67   51.99
  -8   4  -8  291.97   35.00
   8   4   8  332.27   44.20
  -8   4  -8  290.87   39.60
  10  -4   8  205.18   53.79
  10  -4   8  220.18   37.80
  10   4   8  239.58   44.90
 -10   4  -8  214.58   39.70
 -10   4  -8  198.38   34.30
  12  -4   8   -4.80   42.60
  12  -4   8  -11.60   27.20
 -12   4  -8   12.90   23.10
 -12   4  -8   -8.20   26.70
  12   4   8   77.59   40.30
  14  -4   8   69.69   43.90
  14  -4   8   31.50   32.50
  14   4   8    7.50   38.40
 -14   4  -8   38.50   28.30
 -14   4  -8   38.50   32.00
  16  -4   8  113.69   48.90
  16   4   8   77.99   44.80
 -16   4  -8  129.89   41.00
  18   4   8   35.80   46.60
 -27  -5   8  -38.20   48.40
 -27   5   8   24.70   48.70
 -25  -5   8   32.80   49.70
 -25   5   8  -12.50   39.80
 -23  -5   8  -14.10   41.30
 -23   5   8   -3.30   36.60
 -21  -5   8  -17.30   38.60
 -21   5   8  -21.30   32.40
 -19  -5   8   -4.80   33.40
  19   5  -8    7.30   25.40
 -19   5   8  -18.00   31.00
 -17  -5   8  -23.00   33.90
 -17   5   8   19.20   30.80
  17   5  -8   15.80   23.50
 -15  -5   8  -11.00   31.70
 -15   5   8    3.10   27.20
  15   5  -8   39.70   22.50
 -13  -5   8  104.89   37.80
  13   5  -8   84.19   23.80
 -13   5   8  128.69   34.00
 -11  -5   8   56.19   32.70
  11   5  -8    3.70   18.40
 -11   5   8    9.20   24.20
  -9  -5   8   41.90   33.30
   9   5  -8   15.30   15.90
  -9   5   8   -4.40   20.70
  -9   5   8   13.70   17.70
  -7  -5   8    1.70   33.60
  -7   5   8    2.20   16.50
  -7   5   8   10.70   19.30
   7   5  -8   -3.90   14.90
  -5  -5   8   25.50   35.50
  -5   5   8   23.10   20.90
   5   5  -8   43.20   16.90
  -3  -5   8   45.40   35.50
   3   5  -8   32.20   16.10
  -3   5   8   35.70   22.90
  -1  -5   8   44.40   35.00
   1   5  -8   56.09   19.00
  -1   5   8  101.19   27.40
   1  -5   8   -4.20   36.00
  -1   5  -8  -13.90   13.70
   1   5   8   -6.60   25.50
   3  -5   8    5.10   38.30
  -3   5  -8    1.40   15.30
   3   5   8    6.10   26.70
   5  -5   8    2.60   42.10
  -5   5  -8   27.30   24.70
   5   5   8  -12.60   26.70
  -5   5  -8   12.20   18.20
   7  -5   8   97.29   50.59
   7   5   8  100.29   35.30
  -7   5  -8   71.59   30.20
  -7   5  -8   47.50   22.10
   9  -5   8  -42.00   47.20
  -9   5  -8   11.20   27.80
  -9   5  -8  -24.90   22.60
   9   5   8   -3.60   34.30
  -9   5  -8  -25.20   19.50
  11  -5   8   39.50   47.30
  11  -5   8  -13.50   27.00
  11   5   8   -2.50   37.50
 -11   5  -8    5.50   21.90
 -11   5  -8   -3.20   24.20
 -11   5  -8  -14.10   27.60
  13  -5   8   55.59   47.80
  13  -5   8  -20.90   28.10
  13   5   8   24.40   42.60
 -13   5  -8   -7.90   28.70
 -13   5  -8   26.10   27.10
 -13   5  -8   17.70   32.30
  15  -5   8  109.39   54.99
  15   5   8   55.59   46.10
 -15   5  -8   58.49   55.89
 -15   5  -8   26.80   38.20
  17  -5   8   66.39   52.89
  17   5   8  -13.10   46.60
 -17   5  -8    7.90   39.60
  19  -5   8   82.79   70.09
  19   5   8   41.40   51.69
 -26  -6   8  -17.70   49.80
 -26   6   8  -25.50   44.60
 -24  -6   8    6.70   47.40
 -24   6   8   28.90   43.40
 -22  -6   8  -19.70   45.00
 -22   6   8   25.10   37.40
 -20  -6   8   44.00   45.70
 -20   6   8    7.80   38.30
  20   6  -8   77.99   33.60
 -18  -6   8  144.59   48.10
 -18   6   8  114.79   44.20
  18   6  -8  206.28   36.60
 -16  -6   8  214.28   49.00
 -16   6   8  251.97   47.90
  16   6  -8  268.87   37.10
 -14  -6   8  162.38   45.80
  14   6  -8  177.78   32.20
 -14   6   8  147.49   40.50
 -12  -6   8  136.59   43.10
 -12   6   8  190.08   36.80
  12   6  -8  141.99   28.80
 -10  -6   8   58.49   39.70
 -10   6   8   66.79   28.30
  10   6  -8    6.70   20.70
 -10   6   8    9.30   20.80
  -8  -6   8  115.29   45.00
   8   6  -8   75.89   22.40
  -8   6   8   89.49   26.50
  -8   6   8   47.20   24.00
  -6  -6   8  236.78   47.50
   6   6  -8  159.58   24.70
  -6   6   8  217.48   30.20
  -4  -6   8  144.69   45.40
  -4   6   8   83.69   28.70
   4   6  -8   85.69   19.80
  -2  -6   8   39.80   43.20
  -2   6   8   94.79   30.90
   2   6  -8   58.49   20.00
   0  -6   8  -45.30   42.90
   0   6  -8    0.50   15.50
   0   6   8  -19.80   26.30
   2  -6   8  210.28   53.39
   2   6   8  169.88   36.60
  -2   6  -8  164.18   25.00
   4  -6   8  135.09   52.39
   4   6   8  151.18   38.70
  -4   6  -8  201.58   37.70
  -4   6  -8  186.08   27.40
   6  -6   8  180.08   57.49
   6   6   8  188.38   43.30
  -6   6  -8  186.68   28.90
  -6   6  -8  177.58   39.50
   8  -6   8  701.13   93.99
   8   6   8  490.85   56.69
  -8   6  -8  578.74   47.60
  -8   6  -8  664.23   63.59
  10  -6   8    1.40   50.99
 -10   6  -8  -11.90   29.80
  10   6   8    6.40   41.80
 -10   6  -8   -2.70   21.10
  12  -6   8   47.60   55.79
  12  -6   8  -17.10   28.40
 -12   6  -8  -12.10   22.30
 -12   6  -8   46.00   36.30
  12   6   8    2.40   44.50
  14  -6   8  133.89   62.79
 -14   6  -8   13.10   38.70
  14   6   8   -7.90   46.90
  16  -6   8  183.58   61.89
 -16   6  -8   33.90   42.20
  16   6   8   52.69   49.99
  18  -6   8  224.48   63.19
  18   6   8  -11.40   50.09
 -18   6  -8   93.09   47.80
 -25  -7   8  -25.10   51.59
 -25   7   8  -25.30   42.00
 -23  -7   8  -84.89   45.20
 -23   7   8    6.40   40.20
 -21  -7   8    5.50   47.70
  21   7  -8    0.90   39.30
 -21   7   8   60.59   41.50
 -19  -7   8  232.18   59.49
  19   7  -8  163.58   38.90
 -19   7   8  117.49   44.00
 -17  -7   8  324.37   59.39
  17   7  -8  276.27   42.50
 -17   7   8  314.17   53.99
 -15  -7   8  457.55   63.09
 -15   7   8  528.55   66.09
  15   7  -8  569.74   51.99
 -13  -7   8  317.37   55.09
  13   7  -8  299.87   38.70
 -13   7   8  433.56   57.59
 -11  -7   8  200.28   50.19
  11   7  -8  212.28   32.90
 -11   7   8  240.98   40.20
  -9  -7   8   17.80   43.00
  -9   7   8  -14.80   24.10
   9   7  -8  -27.80   18.80
  -9   7   8    9.10   23.50
   7  -7  -8  117.99   36.70
  -7  -7   8  178.68   50.19
   7   7  -8  114.39   25.70
  -7   7   8  175.88   29.30
  -7   7   8  168.18   30.50
  -5  -7   8  214.58   55.09
   5   7  -8  188.98   27.60
  -5   7   8  268.47   36.50
  -3  -7   8  135.59   52.89
   3   7  -8  200.58   28.10
  -3   7   8  223.18   36.30
  -1  -7   8   49.40   49.90
   1   7  -8   14.00   17.80
  -1   7   8   18.70   31.70
   1  -7   8  101.29   55.79
   1   7   8  109.49   37.90
  -1   7  -8  107.19   23.70
   3  -7   8  251.57   62.99
  -3   7  -8  331.27   37.10
   3   7   8  423.66   50.19
   5  -7   8  872.31   96.49
   5   7   8  754.62   72.79
  -5   7  -8  784.52   48.60
  -5   7  -8  853.81   66.19
   7  -7   8  575.14   79.89
  -7   7  -8  756.02   69.39
   7   7   8  510.65   59.39
  -7   7  -8  701.43   50.19
   9  -7   8  175.68   64.79
   9   7   8  141.59   48.70
  -9   7  -8  182.78   33.20
  -9   7  -8  177.58   46.40
  11  -7   8  -24.20   56.79
  11   7   8    6.40   42.50
 -11   7  -8   28.30   24.40
 -11   7  -8   -1.70   39.70
  13  -7   8   19.40   60.89
  13   7   8  -29.10   44.20
 -13   7  -8   36.10   41.10
  15  -7   8   57.69   59.19
  15   7   8   -6.60   48.90
 -15   7  -8   18.20   43.30
  17  -7   8  158.18   63.39
  17   7   8   -2.40   51.69
 -17   7  -8   20.50   46.10
 -24  -8   8 -120.79   49.60
 -24   8   8    5.70   43.90
 -22  -8   8  -25.80   50.89
 -22   8   8   30.40   43.80
 -20  -8   8   -2.40   52.99
 -20   8   8   14.90   40.10
  20   8  -8  -11.70   36.90
 -18  -8   8   67.59   50.89
 -18   8   8  117.29   47.70
  18   8  -8   65.49   38.10
 -16  -8   8   49.60   49.99
  16   8  -8  101.29   37.10
 -16   8   8  154.58   46.30
 -14  -8   8  464.75   66.39
 -14   8   8  661.13   67.19
  14   8  -8  598.34   55.89
 -12  -8   8   68.09   51.39
  12   8  -8   51.79   30.20
 -12   8   8   91.79   38.30
 -10  -8   8   20.20   50.79
  10  -8  -8   79.19   44.60
 -10   8   8   69.09   32.60
  10   8  -8   41.60   26.90
  -8  -8   8   27.80   49.50
   8  -8  -8   40.60   40.60
  -8   8   8   13.60   28.20
   8   8  -8    6.80   22.30
  -8   8   8   32.40   26.80
  -6  -8   8  -43.60   50.79
   6   8  -8  -23.40   19.30
  -6   8   8    6.10   29.20
  -4  -8   8   58.09   51.99
   4   8  -8   26.40   21.50
  -4   8   8   58.29   33.70
  -2  -8   8   58.29   56.49
   2   8  -8   -5.70   20.20
  -2   8   8   14.80   34.40
   0  -8   8   14.20   56.69
   0   8   8   23.20   35.90
   0   8  -8   33.00   21.70
   2  -8   8  144.09   65.69
  -2   8  -8  105.79   25.30
   2   8   8  172.28   44.30
   4  -8   8  448.26   75.29
  -4   8  -8  500.85   44.10
   4   8   8  433.16   54.99
   6  -8   8  339.57   71.29
  -6   8  -8  177.08   30.50
  -6   8  -8  219.08   47.60
   6   8   8  257.37   49.50
   8  -8   8   51.59   61.19
  -8   8  -8   34.50   25.00
  -8   8  -8   57.59   43.60
   8   8   8   50.79   43.80
  10  -8   8   35.30   61.79
 -10   8  -8   67.19   26.90
 -10   8  -8   60.89   48.00
  10   8   8   36.50   46.00
  12  -8   8   84.09   66.79
 -12   8  -8   44.60   46.40
  12   8   8    6.20   48.90
  14  -8   8  165.18   71.29
 -14   8  -8   50.69   48.50
  14   8   8  -25.80   50.09
  16  -8   8  144.39   67.69
  16   8   8  -15.90   52.89
 -16   8  -8   26.50   48.70
 -23  -9   8  -34.50   58.69
 -23   9   8    8.20   45.40
 -21  -9   8  -30.80   57.79
 -21   9   8   55.19   48.70
  21   9  -8  -55.99   42.90
 -19  -9   8  -42.70   52.19
  19   9  -8  -34.80   39.50
 -19   9   8   22.50   43.10
 -17  -9   8  -31.90   51.09
  17   9  -8  -38.40   35.30
 -17   9   8   28.80   40.10
  15  -9  -8  130.59   50.79
 -15  -9   8  -26.20   51.39
 -15   9   8  125.59   41.50
  15   9  -8   19.20   35.10
  13  -9  -8  158.88   49.20
 -13  -9   8   90.69   56.79
  13   9  -8   94.89   36.80
 -13   9   8   71.09   41.10
  11  -9  -8   52.29   46.40
 -11  -9   8  -15.40   52.39
  11   9  -8  -16.90   28.40
 -11   9   8   30.30   34.60
  -9  -9   8   66.19   57.89
   9  -9  -8   91.89   45.90
  -9   9   8   43.60   32.80
   9   9  -8   55.99   28.90
  -7  -9   8  157.78   60.99
  -7   9   8  179.48   51.89
  -7   9   8  207.18   36.80
   7   9  -8  168.18   31.80
  -5  -9   8  128.19   62.69
  -5   9   8  117.49   39.20
   5   9  -8  140.49   30.30
  -3  -9   8  264.87   70.59
  -3   9   8  132.99   41.00
   3   9  -8  168.18   30.50
  -1  -9   8  120.99   64.59
   1   9  -8   59.29   25.50
  -1   9   8  152.68   43.50
   1  -9   8    5.30   62.79
   1   9   8  103.29   42.50
  -1   9  -8   59.69   26.10
   3  -9   8   75.49   63.59
  -3   9  -8   48.30   25.60
   3   9   8   60.89   42.90
   5  -9   8   -8.40   59.79
   5   9   8   46.80   43.70
  -5   9  -8  -12.00   21.80
   7  -9   8  -38.80   59.69
  -7   9  -8  -12.00   22.00
   7   9   8  -19.10   40.90
  -7   9  -8  -49.99   38.10
   9  -9   8   31.10   65.59
   9   9   8   44.40   47.80
  -9   9  -8  -35.90   43.00
  -9   9  -8   13.70   24.50
  11  -9   8   52.39   71.89
 -11   9  -8   10.70   48.20
  11   9   8  -56.79   48.70
  13  -9   8  111.29   71.69
 -13   9  -8  -16.80   49.30
  13   9   8   19.00   55.19
 -15   9  -8    6.50   53.69
  15   9   8  -72.29   54.79
 -22 -10   8 -108.39   59.29
 -22  10   8   48.50   46.50
  20 -10  -8  140.99   57.19
 -20 -10   8 -145.49   53.39
  20  10  -8  -97.79   43.20
 -20  10   8   56.29   48.40
 -18 -10   8  -89.29   56.29
  18 -10  -8   97.59   53.29
 -18  10   8   -5.00   43.20
  18  10  -8  -93.79   38.90
 -16 -10   8  -65.59   56.79
  16 -10  -8  107.39   52.79
  16  10  -8    1.90   39.60
 -16  10   8   16.00   42.00
  14 -10  -8  109.39   49.70
 -14 -10   8  -68.79   53.49
 -14  10   8   41.90   40.30
  14  10  -8  -11.50   35.90
 -12 -10   8  -67.09   53.49
  12 -10  -8   75.39   46.00
  12  10  -8  -15.50   30.40
 -12  10   8  -10.20   34.60
 -10 -10   8  -23.30   54.59
  10 -10  -8  109.29   53.59
 -10  10   8   82.89   38.10
  10  10  -8   87.99   33.40
  -8 -10   8   16.00   56.39
   8  10  -8   79.59   32.40
  -6 -10   8  350.96   72.39
  -6  10   8  329.47   43.40
   6  10  -8  442.06   48.50
  -4 -10   8  175.58   66.19
   4  10  -8  275.47   37.60
  -4  10   8  232.28   43.50
  -2 -10   8  175.68   68.79
   2  10  -8  228.48   35.70
  -2  10   8  219.48   45.10
   0 -10   8  126.79   63.99
   0  10   8  180.58   47.30
   0  10  -8  137.19   31.70
   2 -10   8   53.19   65.99
   2  10   8   -2.30   42.90
  -2  10  -8   29.40   24.70
   4 -10   8  -38.20   63.89
  -4  10  -8   -4.90   22.60
   4  10   8  -68.79   38.80
   6 -10   8   10.10   65.99
   6  10   8  -20.70   43.80
  -6  10  -8   -2.20   23.90
   8 -10   8   34.50   68.29
   8  10   8  -25.50   47.10
  -8  10  -8   -3.60   24.70
  -8  10  -8  -19.60   44.70
  10 -10   8   28.30   70.99
 -10  10  -8  -79.69   46.10
  10  10   8  -25.80   51.49
  12 -10   8  200.28   82.19
 -12  10  -8   19.20   54.99
  12  10   8  -33.30   55.49
 -19 -11   8  -98.09   61.39
  19 -11  -8  181.98   59.59
 -19  11   8   13.90   48.30
  19  11  -8  -68.29   44.00
  17 -11  -8  135.19   56.09
 -17 -11   8  -89.89   61.79
  17  11  -8  -78.89   40.50
 -17  11   8   21.10   44.60
  15 -11  -8   95.89   51.49
 -15 -11   8 -100.89   55.59
 -15  11   8   25.30   42.50
  15  11  -8  -56.69   38.70
 -13 -11   8 -123.19   57.69
  13 -11  -8   63.69   50.09
 -13  11   8   36.40   41.10
  13  11  -8   10.20   37.30
 -11 -11   8  -64.89   57.49
  11  11  -8  -21.40   32.20
 -11  11   8   44.70   59.79
  -9 -11   8   43.10   66.49
   9  11  -8  -23.20   28.80
  -7 -11   8   42.40   62.09
   7  11  -8   84.09   33.60
  -7  11   8   76.59   45.90
  -5 -11   8  152.58   73.39
   5  11  -8  165.78   34.50
  -5  11   8  150.08   41.30
  -3 -11   8   43.90   68.19
   3  11  -8   71.69   30.30
  -3  11   8  109.69   41.10
  -1 -11   8  124.39   71.59
   1  11  -8  133.49   34.30
  -1  11   8  135.89   44.10
   1 -11   8  -58.59   64.69
  -1  11  -8    5.10   26.80
   1  11   8  -31.40   41.40
   3 -11   8  -73.79   64.19
  -3  11  -8   30.50   25.30
   3  11   8  -19.90   44.90
   5 -11   8   75.99   72.39
  -5  11  -8   15.60   26.80
   5  11   8  -99.69   43.90
   7 -11   8   34.80   73.69
  -7  11  -8  -16.70   23.70
   7  11   8  -50.99   48.60
   9 -11   8   60.39   71.09
  -9  11  -8  -81.69   49.10
   9  11   8  -65.19   51.59
  11 -11   8   95.19   76.39
  11  11   8  -95.99   52.89
 -11  11  -8  -93.09   52.79
 -16 -12   8 -122.79   65.49
  16 -12  -8  180.98   56.89
 -16  12   8   -4.10   45.20
  16  12  -8  -37.20   44.50
 -14 -12   8 -158.98   60.59
  14  12  -8    5.10   42.80
 -14  12   8   29.70   51.09
 -12 -12   8  -57.19   63.99
  12  12  -8  -24.80   37.20
 -10 -12   8  -60.49   64.49
  10  12  -8   -0.70   36.10
  -8 -12   8  -74.69   66.29
   8  12  -8   17.60   34.60
  -6 -12   8  -52.29   67.19
  -6  12   8  -45.80   40.70
   6  12  -8  -30.20   30.10
  -4 -12   8  -57.49   67.29
   4  12  -8   -2.70   30.30
  -4  12   8  -45.90   39.10
  -2 -12   8  -46.20   68.79
   2  12  -8  -42.30   28.60
  -2  12   8  -28.90   40.50
   0 -12   8    9.40   71.99
   0  12  -8  -19.60   28.10
   0  12   8  -33.80   41.90
   2 -12   8    8.40   74.09
   2  12   8  -14.10   43.40
  -2  12  -8  -20.30   27.00
   4 -12   8   38.60   77.39
   4  12   8  -16.40   47.70
  -4  12  -8   25.70   28.60
   6 -12   8   39.50   75.69
   6  12   8  -46.50   47.80
  -6  12  -8   21.90   30.80
   8 -12   8  141.49   81.99
   8  12   8  -54.69   52.49
 -13 -13   8 -137.49   68.59
  13  13  -8  -24.00   40.30
 -11 -13   8 -159.48   64.79
  11  13  -8  -34.00   37.70
  -9 -13   8 -149.88   69.39
   9  13  -8  -54.89   34.60
  -7 -13   8 -131.79   66.59
   7  13  -8  -25.60   30.50
  -5 -13   8  -47.00   76.69
   5  13  -8   -5.30   32.60
  -5  13   8  -47.50   48.30
  -3 -13   8 -123.99   69.99
   3  13  -8  -19.70   33.20
  -1 -13   8  -24.80   76.69
  -1  13   8  -98.19   42.30
   1  13  -8  -20.40   30.50
   1 -13   8  -17.70   78.29
  -1  13  -8  -10.70   31.40
   1  13   8  -85.29   44.20
   3 -13   8  -22.80   74.79
  -3  13  -8  -15.00   29.00
   3  13   8  -70.79   46.50
   5 -13   8   30.40   82.49
  -5  13  -8   14.90   33.60
   5  13   8  -82.49   49.80
   8  14  -8  -16.50   35.70
  -6 -14   8 -174.48   70.19
   6  14  -8   10.50   35.00
  -4 -14   8 -200.58   77.79
   4  14  -8  -39.00   34.20
  -4  14   8 -113.59   62.19
  -2 -14   8 -138.29   75.79
  -2  14   8  -49.60   46.30
   2  14  -8   12.30   35.00
   0  14  -8  -27.70   33.20
 -28   0   9  -37.00   45.50
 -28   0   9    8.00   36.50
 -26   0   9   28.20   41.90
 -26   0   9   26.40   31.80
 -24   0   9   -1.20   36.10
 -24   0   9   37.20   28.70
 -22   0   9  -11.00   23.40
 -22   0   9  -22.70   32.00
 -20   0   9  -34.90   25.70
 -18   0   9    9.20   25.60
 -16   0   9  -25.00   20.60
 -14   0   9  -11.60   20.40
  12   0  -9    8.10   11.30
 -12   0   9    0.60   20.30
 -10   0   9    1.00   17.60
  10   0  -9    4.40   10.20
   8   0  -9   -2.80   11.40
  -8   0   9   14.40   18.00
   6   0  -9   12.30   11.90
  -6   0   9    3.80   14.90
   4   0  -9    5.80   12.00
  -4   0   9   15.80   15.20
  -4   0   9    5.10   13.10
   2   0  -9   14.80   12.70
  -2   0   9   17.50   15.20
   0   0   9   27.40   15.30
   0   0  -9   17.20   14.10
  -2   0  -9   14.10   13.80
   2   0   9   36.50   17.40
   4   0   9   15.80   17.50
  -4   0  -9   25.00   16.80
  -6   0  -9   -7.50   14.50
   6   0   9   30.10   20.90
  -8   0  -9  -10.90   17.30
   8   0   9   20.00   24.30
  10   0   9   19.60   29.30
 -10   0  -9  -12.70   19.80
 -12   0  -9    1.10   24.10
  12   0   9   13.40   32.30
 -14   0  -9  -11.90   26.70
  14   0   9   19.40   34.30
  16   0   9   39.00   40.00
 -29  -1   9   15.50   36.00
 -29  -1   9  -21.90   48.00
 -29   1   9   -5.50   46.40
 -27  -1   9    2.50   30.10
 -27  -1   9    2.20   44.70
 -27   1   9   -4.90   41.50
 -25  -1   9   -0.60   41.60
 -25  -1   9   21.00   30.00
 -25   1   9   10.90   39.10
 -23  -1   9  131.39   32.40
 -23  -1   9  118.99   44.40
 -21  -1   9   81.99   28.20
 -21  -1   9  108.19   37.80
 -21   1   9  105.29   44.20
 -19  -1   9  263.37   32.40
 -19  -1   9  308.47   49.50
 -19   1   9  241.58   47.10
 -17  -1   9  130.29   24.90
 -17  -1   9  131.49   36.20
 -17   1   9  117.09   34.80
 -15  -1   9   12.40   24.00
 -15   1   9  -10.70   23.70
  15   1  -9    7.40   12.60
 -13  -1   9  267.47   38.60
  13   1  -9  260.17   23.90
 -13   1   9  258.57   38.70
  11  -1  -9  810.92   32.10
 -11  -1   9  834.82   51.99
 -11   1   9  840.02   48.70
  11   1  -9  856.91   34.20
 -11   1   9  762.02   34.10
   9  -1  -9  356.46   26.10
  -9  -1   9  369.56   39.40
  -9   1   9  336.77   28.70
   9   1  -9  349.27   26.40
  -9   1   9  340.97   34.60
  -7  -1   9  470.15   39.00
   7  -1  -9  475.85   30.60
  -7   1   9  513.95   33.80
  -7   1   9  500.65   34.20
   7   1  -9  496.55   29.90
  -5  -1   9   41.50   20.50
   5  -1  -9   45.80   14.60
  -5   1   9   41.30   16.00
   5   1  -9   38.80   13.90
   3  -1  -9   93.29   19.60
  -3  -1   9   84.39   22.80
  -3   1   9   96.29   20.40
   3   1  -9   68.59   17.50
  -1  -1   9  786.62   43.80
   1  -1  -9  785.52   41.00
   1   1  -9  797.22   38.40
  -1   1   9  748.33   42.00
  -1  -1  -9 1505.85   54.69
   1  -1   9 1374.46   51.29
   1   1   9 1459.15   55.39
  -1   1  -9 1498.45   51.29
   3  -1   9  792.12   43.10
  -3  -1  -9  730.03   43.90
   3   1   9  717.33   44.60
  -3   1  -9  758.42   41.70
   5  -1   9  103.89   28.70
  -5  -1  -9   87.99   22.70
   5  -1   9   73.09   21.80
   5   1   9   30.70   21.30
  -5   1  -9   79.99   21.00
  -7  -1  -9   17.40   19.70
   7  -1   9   23.80   22.40
   7   1   9   -0.60   23.00
  -7   1  -9   34.60   18.70
   9  -1   9   36.50   28.50
  -9  -1  -9   48.30   22.80
  -9   1  -9   53.29   23.60
  -9   1  -9   37.70   22.90
   9   1   9   21.60   29.70
 -11  -1  -9   52.59   28.30
  11  -1   9   67.29   34.20
 -11   1  -9   66.79   28.10
  11   1   9   52.29   34.50
  13  -1   9  149.09   39.60
 -13   1  -9   84.19   30.50
  13   1   9  134.39   39.40
  15  -1   9   44.60   40.90
 -15   1  -9   12.70   30.90
  15   1   9  120.59   41.60
  17  -1   9   19.40   47.40
  17   1   9   53.89   41.80
 -28  -2   9  -20.80   33.20
 -28  -2   9  -27.10   45.60
 -28   2   9   38.40   48.20
 -26  -2   9  -10.10   44.80
 -26  -2   9   16.80   32.00
 -26   2   9   -5.90   40.10
 -24  -2   9   25.80   30.50
 -24  -2   9  111.39   47.10
 -24   2   9   45.80   38.50
 -22  -2   9  156.58   45.70
 -22  -2   9  153.98   32.70
 -22   2   9  182.58   47.00
 -20  -2   9  350.66   53.09
 -20  -2   9  345.47   36.10
 -20   2   9  322.37   51.09
 -18  -2   9  410.96   37.10
 -18  -2   9  436.76   54.99
 -18   2   9  342.57   49.20
 -16  -2   9   66.49   31.30
 -16  -2   9   64.99   20.80
  16   2  -9   32.50   16.00
 -16   2   9   41.60   28.90
 -14  -2   9   22.10   24.80
 -14   2   9    1.20   23.80
  14   2  -9   31.00   14.70
 -12  -2   9  581.34   51.09
 -12   2   9  568.24   46.30
  12   2  -9  567.44   30.90
 -10  -2   9  900.61   54.99
  10  -2  -9  938.01   36.40
  10   2  -9  963.20   38.10
 -10   2   9  965.40   49.30
 -10   2   9  930.11   38.80
  -8  -2   9  497.75   44.80
   8  -2  -9  502.25   31.10
   8   2  -9  513.85   31.80
  -8   2   9  513.75   36.70
  -8   2   9  473.35   34.50
   6  -2  -9  430.66   31.90
  -6  -2   9  401.06   41.80
  -6   2   9  428.96   35.80
   6   2  -9  437.16   30.70
   4  -2  -9   81.99   19.20
  -4  -2   9   79.29   25.80
  -4   2   9   68.39   21.00
   4   2  -9   37.50   15.10
  -2  -2   9  319.07   36.10
   2  -2  -9  299.07   31.30
   2   2  -9  298.47   29.10
  -2   2   9  278.07   30.40
   0  -2   9 2568.34   69.39
   0  -2  -9 2663.63   71.79
   0   2   9 2682.13   71.19
   0   2  -9 2732.33   67.09
   2  -2   9  881.61   51.79
  -2  -2  -9  878.01   47.50
   2   2   9  889.61   49.00
  -2   2  -9  909.41   43.40
   4  -2   9  802.12   52.79
  -4  -2  -9  780.62   47.10
   4  -2   9  848.52   46.80
   4   2   9  857.71   52.09
  -4   2  -9  873.41   44.50
   6  -2   9  132.49   28.00
   6  -2   9  103.99   34.60
  -6  -2  -9  115.29   26.40
  -6   2  -9  112.59   24.80
   6   2   9  122.59   30.20
  -6   2  -9  136.09   27.20
   8  -2   9  -10.00   22.10
   8  -2   9  -59.39   32.10
  -8  -2  -9   -4.80   19.60
   8   2   9  -24.10   25.50
  -8   2  -9   -9.90   18.90
  -8   2  -9  -18.00   17.10
  10  -2   9   63.89   41.10
  10  -2   9   76.89   33.30
  10   2   9   34.30   33.80
 -10   2  -9   80.59   27.50
 -10   2  -9   39.60   25.20
  12  -2   9  172.88   40.20
  12   2   9  209.58   42.60
 -12   2  -9  156.88   35.00
  14  -2   9   -3.90   33.60
  14   2   9   12.30   38.30
 -14   2  -9   24.20   29.10
  16  -2   9   31.50   39.40
 -16   2  -9   -2.70   52.99
  16   2   9   -0.70   39.70
  18   2   9    1.50   41.90
 -27  -3   9  -37.30   44.70
 -27  -3   9   -5.70   31.70
 -27   3   9    1.40   44.80
 -25  -3   9   10.80   28.20
 -25  -3   9  -27.80   40.70
 -25   3   9  -20.20   38.10
 -23  -3   9   49.70   27.40
 -23  -3   9   18.00   40.50
 -23   3   9   28.70   35.50
 -21  -3   9   30.50   23.90
 -21  -3   9   49.90   37.30
 -21   3   9    9.50   31.30
 -19  -3   9   87.89   24.50
 -19  -3   9   92.49   37.60
 -19   3   9   69.39   34.60
 -17  -3   9   45.60   34.20
 -17  -3   9  121.39   23.40
 -17   3   9   97.29   33.80
  17   3  -9  107.99   23.20
 -15  -3   9   26.30   29.60
 -15  -3   9   10.90   15.80
 -15   3   9   -1.90   26.70
  15   3  -9   19.20   17.60
 -13  -3   9   16.60   26.50
 -13   3   9   20.30   26.00
  13   3  -9   -8.90   13.30
 -11  -3   9  129.99   33.40
 -11   3   9  168.18   31.00
  11   3  -9  135.89   21.10
   9  -3  -9   -1.70   13.30
  -9  -3   9   -5.20   25.90
  -9   3   9   43.00   18.00
   9   3  -9   10.20   13.00
  -9   3   9   23.60   18.90
   7  -3  -9  293.47   29.80
  -7  -3   9  229.28   36.40
  -7   3   9  281.77   29.70
   7   3  -9  188.38   23.10
  -7   3   9  337.17   34.40
  -5  -3   9   99.09   30.20
   5  -3  -9   61.99   19.60
  -5   3   9   39.10   20.10
   5   3  -9   72.29   17.30
  -3  -3   9  348.97   41.00
   3  -3  -9  346.57   34.10
  -3   3   9  314.87   33.90
   3   3  -9  377.76   31.10
   1  -3  -9  202.58   29.10
  -1  -3   9  213.48   34.60
   1   3  -9  150.48   22.20
  -1   3   9  221.08   30.50
   1  -3   9  905.41   58.29
  -1  -3  -9  861.31   48.30
   1   3   9 1050.19   53.29
  -1   3  -9  938.81   45.00
   3  -3   9  195.78   37.80
  -3  -3  -9  184.68   28.40
  -3   3  -9  284.87   31.70
   3   3   9  214.68   33.00
   5  -3   9  169.08   39.10
  -5  -3  -9  138.49   27.20
   5  -3   9  195.58   30.50
   5   3   9  154.08   32.20
  -5   3  -9  159.98   26.40
  -5   3  -9  189.88   31.20
   7  -3   9   19.80   37.90
   7  -3   9   34.40   24.50
  -7   3  -9   46.10   21.00
  -7   3  -9   34.40   24.50
   7   3   9  -11.90   25.40
   9  -3   9  -13.20   26.10
   9  -3   9  -18.90   39.60
  -9   3  -9    3.50   23.50
   9   3   9  -37.90   29.50
  -9   3  -9   -6.60   18.90
  11  -3   9   21.30   39.30
  11  -3   9  -37.90   29.40
 -11   3  -9   -6.50   24.60
  11   3   9  -12.80   32.80
 -11   3  -9  -28.30   20.90
  13  -3   9   73.29   43.70
  13  -3   9    4.10   32.70
 -13   3  -9   59.19   40.40
 -13   3  -9   22.00   28.60
  13   3   9   45.80   38.40
  15  -3   9    1.40   35.70
  15   3   9   39.70   42.20
 -15   3  -9   10.20   30.80
  17   3   9   29.20   43.40
  19   3   9   87.69   50.09
 -28  -4   9   -6.50   35.00
 -28  -4   9  -42.40   47.20
 -28   4   9   31.20   49.20
 -26  -4   9  -47.40   42.00
 -26   4   9   -4.80   41.00
 -24  -4   9  -40.80   40.70
 -24   4   9  -23.30   37.40
 -22  -4   9  -33.40   38.00
 -22   4   9   11.30   36.60
 -20  -4   9  -16.90   36.40
 -20   4   9   11.40   32.90
 -18  -4   9    9.50   34.00
  18   4  -9   27.50   22.30
 -18   4   9    7.60   29.60
 -16  -4   9   17.60   33.30
  16   4  -9   -9.30   19.00
 -16   4   9  -31.20   25.30
 -14  -4   9  254.17   44.50
  14   4  -9  207.08   27.40
 -14   4   9  213.58   39.40
 -12  -4   9  221.58   42.30
  12   4  -9  268.07   30.80
 -12   4   9  256.47   39.70
 -10  -4   9  688.13   59.49
 -10   4   9  605.94   34.70
 -10   4   9  709.33   47.60
  10   4  -9  698.33   38.10
  -8  -4   9  397.06   52.49
   8   4  -9  324.07   31.20
  -8   4   9  340.17   33.40
  -8   4   9  327.97   34.20
  -6  -4   9   38.80   31.90
  -6   4   9   24.00   19.90
   6   4  -9   17.00   15.10
  -4  -4   9   69.69   36.10
  -4   4   9   56.29   22.80
   4   4  -9   70.19   18.80
  -2  -4   9   67.39   33.60
  -2   4   9    0.90   22.20
   2   4  -9    3.70   13.70
   0  -4   9   32.10   33.00
   0   4   9    4.40   21.50
   0   4  -9   11.50   14.80
   2  -4   9  -16.70   33.10
  -2   4  -9    7.80   15.20
   2   4   9    3.70   23.00
   4  -4   9   36.00   36.80
  -4   4  -9   27.10   17.50
   4   4   9   63.59   26.20
   6  -4   9   -8.20   40.70
  -6   4  -9    6.20   24.10
  -6   4  -9   52.59   21.20
   6   4   9    8.70   26.00
   8  -4   9    6.00   27.30
   8  -4   9   11.30   47.30
  -8   4  -9    0.40   25.90
  -8   4  -9   11.10   19.60
   8   4   9   18.40   31.60
  10  -4   9  161.48   50.49
  10  -4   9  190.98   39.90
  10   4   9  180.18   43.30
 -10   4  -9  129.89   31.60
 -10   4  -9  170.08   36.70
  12  -4   9  156.68   49.70
  12  -4   9   73.49   35.40
 -12   4  -9  120.89   37.20
  12   4   9   97.29   44.50
 -12   4  -9  132.79   34.10
  14  -4   9  173.08   43.30
  14  -4   9  251.87   58.29
 -14   4  -9  124.99   36.00
  14   4   9  212.48   48.10
 -14   4  -9  100.19   38.00
  16   4   9  105.09   47.00
  18   4   9   35.00   48.70
 -27  -5   9   24.70   51.19
 -27   5   9    8.60   45.10
 -25  -5   9  -44.90   45.20
 -25   5   9  -33.70   37.80
 -23  -5   9   12.60   43.50
 -23   5   9   37.10   40.00
 -21  -5   9  112.99   48.60
 -21   5   9  106.49   43.00
 -19  -5   9  140.69   46.90
 -19   5   9  107.99   40.30
  19   5  -9  166.38   31.00
 -17  -5   9   89.99   41.90
 -17   5   9  115.29   41.50
  17   5  -9   84.79   27.00
 -15  -5   9   66.99   38.70
  15   5  -9   61.19   23.60
 -15   5   9   24.10   32.50
 -13  -5   9  854.81   71.39
 -13   5   9  954.60   61.69
  13   5  -9  976.20   47.00
 -11  -5   9 1129.59   74.79
  11   5  -9 1098.79   48.00
 -11   5   9 1139.29   60.39
  -9  -5   9 1025.30   71.79
   9   5  -9 1028.10   46.10
  -9   5   9  973.80   43.70
  -9   5   9 1094.79   53.79
  -7  -5   9  997.10   73.19
   7   5  -9  990.70   45.00
  -7   5   9  995.40   46.60
  -5  -5   9   51.39   36.60
   5   5  -9   27.70   16.40
  -5   5   9   20.70   23.10
  -3  -5   9   60.19   38.50
  -3   5   9   51.59   26.50
   3   5  -9   55.99   18.90
  -1  -5   9  108.99   42.60
  -1   5   9   64.79   28.00
   1   5  -9   59.89   19.30
   1  -5   9  238.68   49.40
  -1   5  -9  193.78   26.00
   1   5   9  215.08   36.60
   3  -5   9  192.58   51.69
  -3   5  -9  120.19   23.80
   3   5   9  163.68   38.00
   5  -5   9  243.88   52.39
  -5   5  -9  225.28   37.80
  -5   5  -9  232.18   32.00
   5   5   9  204.88   41.30
   7  -5   9   23.00   52.19
   7   5   9   49.99   35.50
  -7   5  -9   21.30   29.80
  -7   5  -9   79.39   24.70
   9  -5   9  205.98   39.50
   9  -5   9  268.37   62.89
   9   5   9  182.08   43.50
  -9   5  -9  178.88   33.40
  -9   5  -9  214.58   42.30
  11  -5   9  223.08   58.39
  11  -5   9  196.28   41.60
 -11   5  -9  168.98   34.20
 -11   5  -9  150.68   39.90
  11   5   9  195.18   47.60
  13  -5   9  323.67   49.10
  13  -5   9  399.36   67.09
 -13   5  -9  350.96   55.69
  13   5   9  302.87   55.59
 -13   5  -9  232.08   40.50
  15  -5   9  301.87   63.29
  15   5   9  118.09   51.19
 -15   5  -9  120.19   46.10
  17   5   9   75.49   49.70
 -26  -6   9  -49.80   48.30
 -26   6   9   -2.30   44.30
 -24  -6   9   11.40   50.79
 -24   6   9   37.50   43.10
 -22  -6   9  -21.20   44.40
 -22   6   9   10.50   35.60
 -20  -6   9   49.10   46.90
  20   6  -9   37.10   30.70
 -20   6   9   86.49   42.60
 -18  -6   9    2.20   41.20
  18   6  -9    8.90   26.60
 -18   6   9   17.80   39.30
 -16  -6   9  171.88   49.50
  16   6  -9  183.08   33.50
 -16   6   9  196.78   47.80
 -14  -6   9  754.02   75.09
 -14   6   9  671.03   63.29
  14   6  -9  711.33   48.10
 -12  -6   9  209.18   49.10
 -12   6   9  324.97   44.90
  12   6  -9  267.47   33.20
 -10  -6   9 1031.90   77.89
  10   6  -9  997.90   50.09
 -10   6   9  984.20   46.30
 -10   6   9 1078.09   57.49
  -8  -6   9  227.48   51.59
  -8   6   9  247.88   32.50
   8   6  -9  174.68   26.70
  -6  -6   9  312.77   52.79
  -6   6   9  362.16   37.70
   6   6  -9  355.86   35.90
  -4  -6   9   47.60   43.50
  -4   6   9   25.10   28.90
   4   6  -9    6.90   17.30
  -2  -6   9    4.20   44.60
  -2   6   9    9.80   27.70
   2   6  -9    8.60   15.50
   0  -6   9   30.10   47.30
   0   6   9   88.89   33.20
   0   6  -9   51.49   20.20
   2  -6   9  110.89   52.79
   2   6   9  154.28   37.60
  -2   6  -9  116.89   24.30
   4  -6   9   16.90   51.59
  -4   6  -9   55.09   21.60
   4   6   9  -19.80   33.20
   6  -6   9   24.30   52.69
  -6   6  -9   15.50   21.50
  -6   6  -9   59.59   36.10
   6   6   9   20.10   34.70
   8  -6   9   93.89   57.39
  -8   6  -9   18.40   35.10
  -8   6  -9   17.00   23.00
   8   6   9   -1.30   36.30
  10  -6   9   88.59   36.40
  10  -6   9  122.29   60.29
 -10   6  -9   13.80   35.30
 -10   6  -9   71.89   29.70
  10   6   9   79.89   42.40
  12  -6   9  227.08   65.99
  12  -6   9  263.07   45.30
  12   6   9  388.06   59.39
 -12   6  -9  191.18   36.70
 -12   6  -9  255.17   53.59
  14  -6   9  158.48   61.59
  14   6   9   68.19   49.40
 -14   6  -9   85.59   41.50
  16  -6   9   99.09   58.69
 -16   6  -9   82.79   46.70
  16   6   9   78.29   52.09
 -25  -7   9  -72.69   52.19
 -25   7   9   14.80   45.40
 -23  -7   9  -16.00   52.99
 -23   7   9   47.20   45.20
 -21  -7   9  -28.90   48.70
  21   7  -9  -25.90   39.90
 -21   7   9   30.50   41.00
 -19  -7   9  -13.10   44.90
  19   7  -9  -10.40   29.60
 -19   7   9   42.60   44.50
 -17  -7   9  -22.80   41.90
  17   7  -9  -32.60   28.30
 -17   7   9   -0.20   36.70
 -15  -7   9   -8.60   43.50
 -15   7   9   -1.40   38.80
  15   7  -9   37.00   28.90
 -13  -7   9   14.90   44.40
 -13   7   9   20.10   35.00
  13   7  -9   -9.30   25.70
 -11  -7   9   15.70   43.30
 -11   7   9  107.19   35.20
  11   7  -9   44.20   24.60
  -9  -7   9   28.50   46.40
   9   7  -9  -38.60   20.20
  -9   7   9   47.70   25.60
  -9   7   9   29.60   27.20
  -7  -7   9   26.10   45.60
   7   7  -9   -4.60   19.80
  -7   7   9   13.40   27.90
  -5  -7   9   15.00   50.69
   5   7  -9   18.60   19.90
  -5   7   9   51.49   31.80
  -3  -7   9  -12.00   49.99
   3   7  -9   21.50   19.60
  -3   7   9   26.90   31.70
  -1  -7   9   68.49   54.29
  -1   7   9  -27.90   32.70
   1   7  -9   23.50   19.20
   1  -7   9   48.70   58.39
   1   7   9   63.09   38.40
  -1   7  -9   33.00   20.90
   3  -7   9   37.80   60.59
  -3   7  -9   79.09   23.70
   3   7   9  100.49   43.30
   5  -7   9  141.49   64.49
  -5   7  -9   79.29   25.00
   5   7   9   99.19   42.90
   7  -7   9   28.40   56.19
  -7   7  -9  -31.90   33.80
  -7   7  -9   -5.60   21.60
   7   7   9   19.20   39.90
   9  -7   9   69.69   61.99
  -9   7  -9   65.49   27.20
   9   7   9   62.89   44.20
  -9   7  -9   22.70   40.70
  11  -7   9   92.39   66.29
  11   7   9   44.60   47.40
 -11   7  -9   -7.30   38.40
 -11   7  -9  -19.00   26.90
  13  -7   9   51.09   63.69
  13   7   9    5.70   47.70
 -13   7  -9   59.79   47.30
  15  -7   9  103.49   63.39
  15   7   9  -23.60   50.59
 -15   7  -9   -8.30   45.80
 -24  -8   9    2.80   61.49
 -24   8   9   76.49   50.79
 -22  -8   9   -4.20   57.59
 -22   8   9  106.89   53.79
 -20  -8   9    9.50   52.19
 -20   8   9  107.99   50.49
  20   8  -9   75.19   40.50
 -18  -8   9  -10.40   49.30
  18   8  -9   10.70   35.30
 -18   8   9  144.59   49.10
 -16  -8   9  -22.60   47.30
 -16   8   9   32.40   39.30
  16   8  -9  -48.80   28.00
 -14  -8   9  -12.40   45.10
  14   8  -9   -0.10   29.20
 -14   8   9   20.20   38.60
 -12  -8   9   80.59   51.29
  12   8  -9  110.29   32.60
 -12   8   9   83.39   36.50
  10  -8  -9  298.17   51.69
 -10  -8   9  206.18   58.19
 -10   8   9  211.38   38.00
  10   8  -9  318.27   39.00
  -8  -8   9  -30.40   48.70
   8   8  -9   -5.90   22.70
  -8   8   9   -5.80   31.30
  -6  -8   9   70.99   58.49
   6   8  -9   33.80   22.20
  -6   8   9  101.19   34.40
  -4  -8   9   59.39   55.69
  -4   8   9   71.19   37.10
   4   8  -9   17.90   22.00
  -2  -8   9  109.39   61.99
   2   8  -9  107.89   27.00
  -2   8   9   82.79   40.00
   0  -8   9  232.38   65.99
   0   8  -9  169.48   28.50
   0   8   9  164.28   44.20
   2  -8   9  358.66   72.39
   2   8   9  311.37   51.29
  -2   8  -9  287.67   36.10
   4  -8   9  104.49   63.39
  -4   8  -9   86.99   26.90
   4   8   9   69.39   41.80
   6  -8   9   10.40   58.49
   6   8   9   38.40   42.70
  -6   8  -9   54.39   27.30
   8  -8   9   47.30   62.09
  -8   8  -9    2.50   25.30
  -8   8  -9   42.40   46.40
   8   8   9   30.00   45.20
  10  -8   9  119.19   70.39
 -10   8  -9    1.20   45.30
  10   8   9   -8.90   46.30
 -10   8  -9   23.40   26.70
  12  -8   9  111.59   70.99
  12   8   9   -5.40   49.80
 -12   8  -9   42.00   48.70
  14  -8   9  135.49   69.59
  14   8   9   23.10   53.49
 -14   8  -9   -1.00   46.30
 -23  -9   9  -81.79   54.19
 -23   9   9  103.79   51.89
 -21  -9   9   -9.80   55.69
  21   9  -9  -65.69   39.80
 -21   9   9   94.29   52.69
 -19  -9   9  -42.50   55.39
  19   9  -9    9.20   39.30
 -19   9   9  125.49   51.49
 -17  -9   9  -65.79   52.69
  17   9  -9  -41.60   34.90
 -17   9   9   13.90   39.90
  15  -9  -9  106.49   48.80
 -15  -9   9  -47.40   47.80
 -15   9   9   33.60   37.70
  15   9  -9   12.00   34.40
 -13  -9   9  -18.10   54.29
  13  -9  -9   92.29   46.60
 -13   9   9    4.20   35.10
  13   9  -9  -10.30   30.60
 -11  -9   9  141.59   59.49
  11  -9  -9  234.58   52.19
 -11   9   9  196.48   43.90
  11   9  -9  144.69   35.50
  -9  -9   9  114.79   60.89
   9   9  -9  150.18   31.50
  -7  -9   9   99.29   57.69
  -7   9   9   54.39   35.50
   7   9  -9   22.10   26.50
  -5  -9   9  -24.40   57.99
   5   9  -9   14.00   23.60
  -5   9   9  -69.19   34.40
  -3  -9   9   49.70   60.99
  -3   9   9   -5.00   38.70
   3   9  -9   17.60   23.10
  -1  -9   9   95.19   64.99
   1   9  -9  147.09   29.90
  -1   9   9  100.29   43.00
   1  -9   9  200.28   66.89
  -1   9  -9  128.39   31.30
   1   9   9  127.29   45.50
   3  -9   9   27.50   62.49
   3   9   9   79.49   44.50
  -3   9  -9  114.59   30.90
   5  -9   9   60.59   65.99
   5   9   9    9.80   42.60
  -5   9  -9   59.19   26.40
   7  -9   9   70.29   68.29
   7   9   9   -4.40   43.50
  -7   9  -9  -23.50   22.60
   9  -9   9   55.49   67.89
  -9   9  -9  -27.20   49.10
  -9   9  -9  -12.90   25.90
   9   9   9   76.09   51.29
  11  -9   9  130.89   76.89
  11   9   9  -48.50   50.39
 -11   9  -9  -30.60   48.80
  13  -9   9  109.29   74.99
  13   9   9   97.99   58.09
 -13   9  -9   25.60   57.39
 -20 -10   9 -122.89   55.39
  20 -10  -9  128.39   54.89
  20  10  -9  -32.10   44.30
 -20  10   9   18.90   47.90
 -18 -10   9  -52.59   60.19
  18 -10  -9   75.39   51.49
 -18  10   9   58.49   46.20
  18  10  -9  -60.89   39.00
  16 -10  -9   94.99   49.99
 -16 -10   9 -104.19   56.49
  16  10  -9   22.60   41.00
 -16  10   9    1.50   42.70
 -14 -10   9  -49.70   54.39
  14 -10  -9   84.99   48.80
  14  10  -9    8.80   35.40
 -14  10   9    7.70   36.50
 -12 -10   9 -101.89   52.49
  12  10  -9  -59.09   29.50
 -12  10   9  -43.70   33.20
 -10 -10   9  -30.70   54.89
  10  10  -9   48.00   32.20
  -8 -10   9  -28.60   53.19
   8  10  -9   45.30   30.90
  -6 -10   9  -47.60   58.59
   6  10  -9   26.70   27.10
  -6  10   9  -21.70   36.80
  -4 -10   9  -15.00   58.29
   4  10  -9   10.00   27.50
  -4  10   9   -5.80   38.20
  -2 -10   9  -53.19   59.69
  -2  10   9  -41.80   39.20
   2  10  -9   -3.60   25.00
   0 -10   9  -49.00   62.49
   0  10   9   30.30   43.90
   0  10  -9   19.30   26.10
   2 -10   9  -23.60   65.49
  -2  10  -9   -2.90   23.40
   2  10   9   20.10   44.50
   4 -10   9   48.80   71.69
   4  10   9   37.60   47.90
  -4  10  -9   26.70   25.90
   6 -10   9  -23.00   68.09
   6  10   9  -28.40   44.50
  -6  10  -9   14.20   24.50
   8 -10   9   75.39   69.69
  -8  10  -9   16.90   27.20
   8  10   9  -63.29   47.90
  10 -10   9   55.99   73.69
 -10  10  -9  -82.99   48.20
  10  10   9  -28.30   51.89
  12 -10   9   54.89   75.29
  12  10   9  -76.99   57.09
 -12  10  -9  -17.30   56.59
  19 -11  -9  153.28   57.69
 -19 -11   9 -116.59   61.39
  19  11  -9  -49.80   43.90
 -19  11   9   22.50   49.60
  17 -11  -9  124.79   57.09
 -17 -11   9 -139.79   59.59
 -17  11   9   19.70   43.30
  17  11  -9  -81.49   38.20
 -15 -11   9 -133.59   56.89
  15  11  -9  -18.80   39.50
 -15  11   9   20.90   40.40
 -13 -11   9 -122.29   58.79
  13  11  -9    1.00   37.70
 -11 -11   9  -19.20   61.79
  11  11  -9    6.90   32.90
  -9 -11   9  -28.00   63.69
   9  11  -9   -9.50   28.90
  -7 -11   9  -62.19   60.89
   7  11  -9    6.50   30.50
  -5 -11   9  -69.89   64.59
   5  11  -9   -2.00   29.70
  -5  11   9  -60.29   35.60
  -3 -11   9  -40.90   64.39
   3  11  -9   34.40   29.30
  -3  11   9  -22.10   41.10
  -1 -11   9  -94.69   66.99
   1  11  -9  -32.00   25.90
  -1  11   9  -43.60   40.90
   1 -11   9   13.50   66.99
  -1  11  -9   30.00   25.70
   1  11   9   21.50   45.90
   3 -11   9  -51.19   68.39
   3  11   9  -38.30   46.20
  -3  11  -9   -1.20   26.30
   5 -11   9  -38.20   72.89
   5  11   9  -13.00   48.10
  -5  11  -9    6.50   25.60
   7 -11   9  -25.90   74.49
   7  11   9 -102.99   48.80
  -7  11  -9   27.90   28.20
   9 -11   9   84.59   76.09
   9  11   9   -7.30   55.49
 -16 -12   9 -167.28   63.79
  16  12  -9  -98.89   39.50
 -14 -12   9  -60.29   64.19
  14  12  -9  -68.29   38.40
 -12 -12   9  -75.29   63.79
  12  12  -9   34.00   43.30
 -10 -12   9  -16.50   68.69
  10  12  -9   90.19   40.20
  -8 -12   9  -73.39   67.19
   8  12  -9    7.60   31.40
  -6 -12   9  -91.89   65.59
   6  12  -9    7.20   31.90
  -6  12   9  -43.80   63.19
  -4 -12   9  -79.19   68.59
   4  12  -9  -25.40   28.90
  -4  12   9  -45.80   40.10
  -2 -12   9  -56.59   72.19
   2  12  -9    5.40   31.00
  -2  12   9   25.30   42.40
   0 -12   9  -85.29   69.19
   0  12  -9   48.80   31.60
   0  12   9    0.20   44.70
   2 -12   9   -3.90   74.69
  -2  12  -9   80.29   30.30
   2  12   9  -61.29   46.90
   4 -12   9  -71.69   73.59
   4  12   9  -71.19   46.40
  -4  12  -9   -5.00   29.80
   6 -12   9  -46.10   76.69
  -6  12  -9  -27.10   26.00
   6  12   9 -101.89   49.40
 -13 -13   9 -181.88   68.29
  13  13  -9  -19.80   44.20
  11  13  -9   -3.00   39.20
  -9 -13   9 -129.79   70.09
   9  13  -9  -17.00   34.20
  -7 -13   9 -165.08   66.89
   7  13  -9    9.20   33.80
  -5 -13   9 -150.38   75.29
   5  13  -9  -10.20   33.70
  -3 -13   9    9.30   76.99
   3  13  -9  -13.30   30.60
  -3  13   9  -25.00   45.00
  -1 -13   9 -149.39   74.69
   1  13  -9    5.60   35.50
  -1  13   9  -71.59   44.50
   1 -13   9  -16.70   79.09
   1  13   9  -54.19   45.80
  -1  13  -9   47.50   33.50
   3 -13   9  -53.49   76.09
   3  13   9    0.70   49.80
  -3  13  -9   38.30   33.60
 -28   0  10   79.79   50.09
 -26   0  10  203.18   57.19
 -24   0  10  188.28   51.99
 -22   0  10  261.77   53.89
 -20   0  10   59.39   36.70
 -18   0  10   12.30   30.50
 -16   0  10  129.69   34.50
  14   0 -10   68.09   16.70
 -14   0  10   77.29   29.00
  12   0 -10   63.99   15.30
 -12   0  10   87.39   28.30
 -10   0  10   87.09   25.30
  10   0 -10   73.79   16.40
   8   0 -10  258.07   26.80
  -8   0  10  277.37   35.20
   6   0 -10 2189.68   57.89
  -6   0  10 2157.28   58.39
  -6   0  10 2200.38   61.19
  -4   0  10 2801.12   67.59
   4   0 -10 2804.82   66.39
   2   0 -10 1818.02   57.59
  -2   0  10 1732.83   56.89
   0   0  10  809.82   44.00
   0   0 -10  845.82   43.30
  -2   0 -10  179.88   26.30
   2   0  10  204.28   28.90
  -4   0 -10    8.90   15.60
   4   0  10    2.20   17.70
  -6   0 -10  115.99   26.60
   6   0  10  163.38   31.90
   8   0  10  311.07   43.10
  -8   0 -10  247.38   36.50
 -10   0 -10  106.89   30.20
  10   0  10  122.19   38.60
 -12   0 -10  121.59   34.40
  12   0  10  121.99   40.80
  14   0  10   96.19   41.40
 -14   0 -10  -37.80   27.00
  16   0  10  160.58   46.40
 -29  -1  10   22.70   37.60
 -29  -1  10   66.49   53.49
 -29   1  10   44.80   50.39
 -27  -1  10   22.40   35.10
 -27  -1  10   35.20   47.20
 -27   1  10   68.29   48.40
 -25  -1  10   74.39   47.20
 -25  -1  10  109.89   35.40
 -25   1  10   63.29   45.20
 -23  -1  10  208.28   50.09
 -23  -1  10  191.38   35.30
 -23   1  10  195.48   48.40
 -21  -1  10   34.70   35.10
 -21   1  10   37.10   36.70
 -19  -1  10   56.89   33.80
 -19   1  10   39.80   35.90
 -17  -1  10   10.70   30.30
 -17   1  10   11.40   28.80
 -15  -1  10   19.80   26.40
  15   1 -10   26.50   14.00
 -15   1  10    8.80   25.10
 -13  -1  10   36.90   25.40
 -13   1  10   51.69   26.30
 -13   1  10   22.00   15.70
  13   1 -10   18.80   14.40
 -11  -1  10   11.10   21.90
  11  -1 -10   21.40   12.70
 -11   1  10   45.50   23.10
  11   1 -10   -2.10   12.30
 -11   1  10   28.40   15.60
  -9  -1  10   42.60   23.80
   9  -1 -10   14.20   12.50
  -9   1  10   11.70   19.60
  -9   1  10   17.30   14.40
   9   1 -10   24.20   14.20
  -7  -1  10  871.71   49.20
   7  -1 -10  947.41   41.10
  -7   1  10  883.21   42.50
  -7   1  10  888.11   41.70
   7   1 -10  890.21   41.10
  -5  -1  10  899.91   48.30
   5  -1 -10  949.21   42.50
   5   1 -10  920.91   42.50
  -5   1  10  965.70   44.10
   3  -1 -10 1842.02   58.29
  -3  -1  10 1652.93   56.39
   3   1 -10 1790.52   55.59
  -3   1  10 1759.22   57.79
  -1  -1  10  427.66   35.50
   1  -1 -10  423.26   35.50
  -1  -1  10  428.16   41.70
  -1   1  10  420.06   38.40
   1   1 -10  441.56   33.60
   1  -1  10  496.05   43.00
   1  -1  10  536.45   39.50
  -1  -1 -10  545.45   39.70
   1   1  10  500.95   41.60
  -1   1 -10  531.65   37.00
  -3  -1 -10   37.30   18.00
   3  -1  10   48.40   20.00
   3   1  10   28.70   21.50
  -3   1 -10   42.40   18.00
   5  -1  10   -8.80   18.10
  -5  -1 -10   18.60   18.80
   5   1  10   19.40   21.50
  -5   1 -10    5.60   16.00
  -7  -1 -10   63.99   25.30
   7  -1  10  110.49   31.50
   7   1  10  105.19   33.10
  -7   1 -10  105.29   26.90
  -9  -1 -10   14.80   23.20
   9  -1  10   51.09   31.30
   9   1  10   29.00   33.20
  -9   1 -10   33.00   24.30
  11  -1  10   57.19   35.20
 -11  -1 -10    5.10   25.90
  11   1  10   13.20   33.80
 -11   1 -10   -2.30   24.50
  13  -1  10   46.80   39.30
  13   1  10  101.79   40.80
 -13   1 -10    0.50   28.30
  15  -1  10  109.89   43.50
  15   1  10   84.59   42.70
 -15   1 -10   68.29   36.80
  17  -1  10   94.29   61.99
  17   1  10   88.99   46.10
 -28  -2  10   41.70   36.10
 -28  -2  10   14.30   50.09
 -28   2  10    9.60   45.50
 -26  -2  10  -36.30   41.70
 -26  -2  10    0.70   29.20
 -26   2  10   30.10   40.20
 -24  -2  10    3.80   36.70
 -24  -2  10   44.20   27.60
 -24   2  10  -28.20   35.20
 -22  -2  10   20.80   39.00
 -22  -2  10   30.20   26.00
 -22   2  10   33.80   36.70
 -20  -2  10    6.50   23.00
 -20  -2  10   -8.10   30.30
 -20   2  10    8.80   31.70
 -18  -2  10  126.39   25.30
 -18  -2  10  140.39   39.20
 -18   2  10  168.58   44.00
 -16  -2  10  167.98   40.50
 -16   2  10  177.18   40.50
  16   2 -10  167.78   22.20
 -14  -2  10  290.97   44.80
 -14   2  10  228.88   39.50
  14   2 -10  261.17   28.00
 -12  -2  10  264.47   40.40
 -12   2  10  275.17   37.80
 -12   2  10  294.17   33.10
  12   2 -10  262.57   29.30
 -10  -2  10  177.28   34.70
  10  -2 -10  151.98   21.30
 -10   2  10  169.48   29.60
  10   2 -10  105.09   19.40
 -10   2  10  132.49   22.80
   8  -2 -10   44.70   16.40
  -8  -2  10   69.99   27.10
  -8   2  10   38.80   19.10
   8   2 -10   37.50   15.60
  -8   2  10   56.29   20.30
  -6  -2  10   30.70   23.80
   6  -2 -10   21.20   14.80
  -6   2  10   38.50   19.30
   6   2 -10   15.60   15.00
  -4  -2  10  152.28   31.50
   4  -2 -10  178.48   25.00
   4   2 -10  156.28   24.00
  -4   2  10  173.58   26.90
  -2  -2  10   80.69   29.70
   2  -2 -10   35.00   18.00
   2   2 -10   72.19   18.30
  -2   2  10   79.59   22.50
   0  -2 -10  142.79   24.90
   0  -2  10  128.69   30.70
   0   2  10  160.08   28.00
   0   2 -10  175.08   25.70
   2  -2  10   75.29   20.80
  -2  -2 -10   80.29   22.70
   2  -2  10   74.79   32.00
   2   2  10   72.69   23.80
  -2   2 -10   65.89   19.30
   4  -2  10  117.49   34.10
   4  -2  10  105.99   24.90
  -4  -2 -10   76.89   23.80
   4   2  10   80.19   26.60
  -4   2 -10  104.79   23.00
  -6  -2 -10  101.09   28.10
   6  -2  10  129.79   37.60
   6  -2  10  122.79   30.60
  -6   2 -10   91.89   25.80
   6   2  10   67.89   29.30
  -6   2 -10   97.59   24.40
   8  -2  10  156.48   36.80
   8  -2  10  109.09   42.70
  -8  -2 -10  100.19   28.80
  -8   2 -10   93.59   27.30
  -8   2 -10   98.49   28.80
   8   2  10  110.09   36.90
 -10  -2 -10   49.40   27.30
  10  -2  10   71.19   36.40
 -10   2 -10   67.09   25.90
  10   2  10   58.29   35.50
  12  -2  10   40.30   36.30
  12   2  10   40.30   38.70
 -12   2 -10   49.60   29.90
  14  -2  10   79.49   42.00
  14   2  10   66.79   41.90
 -14   2 -10    4.70   29.00
  16  -2  10   18.80   43.10
 -16   2 -10    5.10   50.69
  16   2  10   56.99   43.40
  18   2  10   11.00   45.10
 -27  -3  10   56.89   51.59
 -27  -3  10   40.80   34.60
 -27   3  10  -18.30   39.10
 -25  -3  10   43.00   45.50
 -25  -3  10  113.89   35.50
 -25   3  10   42.80   40.00
 -23  -3  10  -32.40   25.10
 -23  -3  10  -17.20   37.40
 -23   3  10   18.50   35.10
 -21  -3  10   -6.70   37.30
 -21  -3  10    9.80   22.60
 -21   3  10    2.70   30.00
 -19  -3  10   11.70   35.10
 -19  -3  10   72.69   25.60
 -19   3  10   16.10   34.00
 -17  -3  10  560.34   62.19
 -17  -3  10  580.84   37.10
 -17   3  10  461.95   57.59
  17   3 -10  532.15   36.90
 -15  -3  10  628.24   62.49
 -15   3  10  590.14   55.49
  15   3 -10  691.83   39.00
 -13  -3  10  846.52   64.59
 -13   3  10  781.02   56.89
  13   3 -10  873.71   40.50
 -11  -3  10  544.45   56.09
  11  -3 -10  450.75   32.80
  11   3 -10  503.35   34.50
 -11   3  10  452.25   44.10
 -11   3  10  426.26   35.80
  -9  -3  10    8.50   27.00
   9  -3 -10   33.40   16.70
  -9   3  10   53.69   20.60
  -9   3  10   40.70   20.70
   9   3 -10   44.90   17.70
  -7  -3  10   41.90   29.20
   7  -3 -10   62.59   19.10
  -7   3  10   30.10   21.00
   7   3 -10    6.60   14.80
  -5  -3  10  374.06   44.70
   5  -3 -10  412.56   35.80
   5   3 -10  431.76   32.80
  -5   3  10  390.26   40.70
  -3  -3  10  560.24   55.19
   3  -3 -10  649.74   43.00
  -3   3  10  547.65   45.00
   3   3 -10  557.14   37.30
   1  -3 -10  316.87   36.50
  -1  -3  10  300.87   41.40
  -1   3  10  339.57   38.70
   1   3 -10  305.07   32.20
   1  -3  10   15.30   32.10
  -1  -3 -10   10.70   18.00
  -1   3 -10   24.70   16.60
   1   3  10   32.40   24.00
  -3  -3 -10  102.89   26.40
   3  -3  10  153.98   39.40
   3   3  10  118.69   29.30
  -3   3 -10  120.09   23.40
  -5  -3 -10  245.98   34.70
   5  -3  10  375.46   41.10
   5  -3  10  349.07   49.10
  -5   3 -10  300.27   35.10
   5   3  10  283.57   40.00
   7  -3  10  625.34   56.09
   7  -3  10  661.63   70.89
  -7   3 -10  609.14   50.69
   7   3  10  621.14   58.89
  -7   3 -10  655.73   49.40
   9  -3  10  295.57   53.69
   9  -3  10  238.68   42.80
  -9   3 -10  249.97   39.50
  -9   3 -10  249.28   37.30
   9   3  10  278.57   47.00
  11  -3  10  130.09   41.60
  11  -3  10  117.69   50.69
  11   3  10  101.19   40.90
 -11   3 -10  110.99   33.30
  13  -3  10   54.29   38.80
  13   3  10   39.50   42.10
 -13   3 -10   38.30   28.30
  15  -3  10   72.79   41.80
 -15   3 -10  -26.70   27.50
  15   3  10   17.60   44.30
  17   3  10  108.19   47.20
 -28  -4  10   15.60   51.99
 -28   4  10    9.70   46.80
 -26  -4  10   11.20   47.40
 -26   4  10   86.79   47.50
 -24  -4  10   25.90   43.30
 -24  -4  10   14.00   36.40
 -24   4  10   -0.10   39.20
 -22  -4  10  -19.90   37.80
 -22  -4  10   47.30   27.40
 -22   4  10    8.70   34.70
 -20  -4  10  -46.50   34.20
 -20  -4  10   -8.10   21.20
 -20   4  10  -17.50   31.60
 -18  -4  10   87.99   40.90
  18   4 -10   77.09   24.60
 -18   4  10   54.89   36.40
 -16  -4  10  245.38   49.80
 -16   4  10  308.67   48.50
  16   4 -10  310.67   35.30
 -14  -4  10  494.85   62.99
 -14   4  10  485.25   52.99
  14   4 -10  531.95   37.60
 -12  -4  10  329.07   49.20
  12   4 -10  351.56   34.90
 -12   4  10  357.86   45.00
 -10  -4  10  252.37   44.20
  10   4 -10  239.78   27.60
 -10   4  10  222.68   34.30
 -10   4  10  219.08   28.20
  -8  -4  10   57.89   34.50
   8   4 -10   35.60   17.80
  -8   4  10   24.10   23.10
  -6  -4  10   88.29   37.30
   6   4 -10  104.69   21.40
  -6   4  10  111.79   28.40
  -4  -4  10  420.56   50.39
   4   4 -10  434.16   34.80
  -4   4  10  500.05   46.60
  -2  -4  10  609.84   63.29
   2   4 -10  645.84   40.50
  -2   4  10  600.64   50.19
   0  -4  10   69.59   38.70
   0   4 -10   50.29   17.50
   0   4  10   35.10   26.80
   2  -4  10  -15.20   38.10
  -2   4 -10  -13.50   14.70
   2   4  10   -2.20   24.40
   4  -4  10  139.29   46.10
   4   4  10  141.79   34.40
  -4   4 -10  165.58   27.50
   6  -4  10  396.86   58.39
   6  -4  10  361.76   43.50
  -6   4 -10  407.66   43.80
   6   4  10  309.27   43.70
  -6   4 -10  379.76   47.40
   8  -4  10  422.16   62.99
   8  -4  10  394.16   47.80
   8   4  10  363.16   49.40
  -8   4 -10  340.67   46.00
  -8   4 -10  367.86   43.60
  10  -4  10  181.08   41.70
  10  -4  10  145.59   49.50
  10   4  10  170.98   42.90
 -10   4 -10  163.48   39.50
 -10   4 -10  113.59   31.10
  12  -4  10   53.99   38.70
  12  -4  10   59.89   48.30
  12   4  10   66.69   42.90
 -12   4 -10   18.80   33.20
 -12   4 -10   23.50   29.10
  14  -4  10   24.60   38.10
 -14   4 -10   35.10   29.90
  14   4  10    8.20   42.10
  16   4  10   92.99   46.90
 -27  -5  10   43.30   54.39
 -27   5  10   -0.80   45.90
 -25  -5  10   -4.20   47.40
 -25   5  10  -11.10   38.80
 -23  -5  10  -22.90   41.30
 -23   5  10   37.10   37.70
 -21  -5  10  -34.40   38.60
 -21   5  10  -23.40   35.70
 -19  -5  10  -24.00   38.00
  19   5 -10   22.90   24.40
 -19   5  10  -24.70   33.80
 -17  -5  10   73.59   40.80
 -17   5  10   17.00   37.40
  17   5 -10   76.49   25.30
 -15  -5  10    7.80   36.50
 -15   5  10   -1.00   33.40
  15   5 -10   17.70   21.60
 -13  -5  10    0.90   37.30
 -13   5  10    7.40   26.70
  13   5 -10   14.40   20.50
 -11  -5  10   42.20   38.90
 -11   5  10   31.60   27.60
  11   5 -10   82.29   23.40
 -11   5  10   77.39   24.10
  -9  -5  10   35.80   38.40
  -9   5  10   22.70   24.40
  -9   5  10   28.80   23.70
   9   5 -10   16.50   19.20
  -7  -5  10   21.10   39.90
  -7   5  10   -9.90   25.20
   7   5 -10   12.90   17.10
  -5  -5  10   16.60   40.40
   5   5 -10   13.90   18.10
  -5   5  10   -3.80   25.30
  -3  -5  10  146.99   45.00
   3   5 -10   97.49   22.10
  -3   5  10  128.69   32.80
  -1  -5  10   31.60   43.70
  -1   5  10    2.60   26.80
   1   5 -10    8.60   14.30
   1  -5  10  -18.20   43.00
   1   5  10    8.90   27.70
  -1   5 -10   10.70   16.20
   3  -5  10  135.19   51.49
   3   5  10   99.49   34.50
  -3   5 -10   89.09   23.80
   5  -5  10   50.09   50.59
   5   5  10   77.29   34.80
  -5   5 -10   69.19   24.70
   7  -5  10  144.79   53.79
  -7   5 -10  158.08   39.20
  -7   5 -10   98.79   27.90
   7   5  10  107.49   40.60
   9  -5  10  -14.30   31.20
   9  -5  10   29.60   48.70
  -9   5 -10    2.00   23.10
   9   5  10   46.80   37.10
  -9   5 -10   -6.30   33.00
  11  -5  10   27.00   36.30
  11  -5  10   77.39   54.99
 -11   5 -10   -5.70   27.90
  11   5  10    1.30   40.10
 -11   5 -10    9.40   31.60
  13  -5  10   44.30   39.30
  13  -5  10   34.30   57.29
 -13   5 -10   -2.50   28.20
  13   5  10   37.00   45.30
 -13   5 -10   11.30   35.70
  15   5  10    1.40   46.00
 -26  -6  10  -21.50   49.40
 -26   6  10  -34.50   47.30
 -24  -6  10  -23.10   49.99
 -24   6  10   69.39   46.80
 -22  -6  10  -51.89   45.70
 -22   6  10  -13.80   37.50
 -20  -6  10  -32.00   42.10
  20   6 -10   11.50   28.60
 -20   6  10  -32.20   37.60
 -18  -6  10  202.68   53.99
  18   6 -10  121.79   31.50
 -18   6  10  164.18   49.99
 -16  -6  10   21.40   41.30
  16   6 -10   71.89   26.50
 -16   6  10    7.00   39.30
 -14  -6  10  181.08   49.30
 -14   6  10  204.98   45.30
  14   6 -10  200.48   32.60
 -12  -6  10  212.28   50.89
 -12   6  10  219.58   41.10
  12   6 -10  136.49   29.20
 -10  -6  10   29.20   43.30
  10   6 -10   22.90   22.90
 -10   6  10   68.09   27.40
 -10   6  10   64.59   26.80
  -8  -6  10   27.90   45.80
   8   6 -10   11.10   20.50
  -8   6  10   18.20   26.90
  -6  -6  10  140.39   49.00
   6   6 -10   58.69   21.70
  -6   6  10   63.59   30.20
  -4  -6  10  113.29   51.09
  -4   6  10   97.29   33.40
   4   6 -10  109.49   24.60
  -2  -6  10   72.99   51.89
   2   6 -10   78.69   21.90
  -2   6  10   90.79   34.00
   0  -6  10   64.09   51.09
   0   6 -10   18.70   17.70
   0   6  10    1.00   32.90
   2  -6  10   39.10   54.39
   2   6  10   91.89   36.50
  -2   6 -10   71.39   23.50
   4  -6  10   88.59   57.29
  -4   6 -10  108.09   27.00
   4   6  10   91.09   38.20
   6  -6  10   42.40   54.69
  -6   6 -10   39.80   24.60
   6   6  10   89.69   39.20
   8  -6  10  299.07   65.49
  -8   6 -10  212.78   48.20
  -8   6 -10  225.48   35.50
   8   6  10  221.48   49.20
  10  -6  10   48.70   38.70
  10  -6  10   44.70   56.79
 -10   6 -10   84.79   31.00
  10   6  10  106.39   45.30
 -10   6 -10   47.20   41.90
  12  -6  10   11.20   37.40
  12  -6  10   92.99   63.79
 -12   6 -10   14.60   41.80
 -12   6 -10   -7.50   26.30
  12   6  10   52.09   46.20
  14  -6  10   16.60   56.99
 -14   6 -10   14.50   42.30
  14   6  10   60.99   51.19
  16   6  10   18.90   52.79
 -25  -7  10    3.30   54.49
 -25   7  10   42.30   48.80
 -23  -7  10  -49.60   50.89
 -23   7  10   47.50   48.20
 -21  -7  10  -90.39   47.50
 -21   7  10   -2.20   43.30
 -19  -7  10  152.98   54.19
 -19   7  10  128.79   49.50
  19   7 -10  101.99   35.10
 -17  -7  10   99.79   48.90
 -17   7  10  193.78   51.49
  17   7 -10  163.98   35.40
 -15  -7  10  439.16   65.99
  15   7 -10  523.35   47.90
 -15   7  10  537.15   64.39
 -13  -7  10   77.89   48.70
 -13   7  10   14.40   33.50
  13   7 -10  -24.50   23.90
 -11  -7  10  512.85   67.19
 -11   7  10  715.03   56.99
  11   7 -10  690.23   50.29
  -9  -7  10   41.00   49.60
  -9   7  10   10.10   24.50
   9   7 -10  -46.80   20.60
  -9   7  10    3.10   28.50
  -7  -7  10   41.50   49.60
   7   7 -10   -0.40   20.50
  -7   7  10   50.19   32.00
  -5  -7  10   68.19   55.59
   5   7 -10   74.99   25.60
  -5   7  10  124.49   37.50
  -3  -7  10  194.18   61.99
   3   7 -10  150.18   28.20
  -3   7  10  248.48   44.40
  -1  -7  10   41.80   57.39
   1   7 -10   72.99   24.00
  -1   7  10  127.29   42.70
   1  -7  10    8.30   58.29
  -1   7 -10   -8.70   18.50
   1   7  10   39.90   40.20
   3  -7  10   -5.80   59.89
  -3   7 -10   -7.40   21.30
   3   7  10   22.00   39.70
   5  -7  10   82.69   60.49
  -5   7 -10   45.80   24.70
   5   7  10   30.30   39.10
   7  -7  10  477.75   75.99
   7   7  10  439.06   58.29
  -7   7 -10  497.05   50.79
  -7   7 -10  471.35   61.49
   9  -7  10  241.18   70.59
  -9   7 -10  167.48   34.60
   9   7  10  283.67   55.79
  -9   7 -10  206.98   53.89
  11  -7  10   68.09   38.80
  11  -7  10   66.19   66.89
 -11   7 -10   41.50   48.60
 -11   7 -10   41.70   29.80
  11   7  10   59.39   47.20
  13  -7  10   93.29   67.79
  13   7  10  -82.89   46.90
 -13   7 -10    3.00   44.50
  15   7  10  -17.70   51.49
 -15   7 -10   91.39   51.79
 -24  -8  10  -85.59   52.99
 -24   8  10   10.90   47.30
 -22  -8  10  -27.30   55.79
 -22   8  10   -1.90   48.40
 -20  -8  10   38.00   54.89
  20   8 -10  -38.50   34.10
 -20   8  10   -9.70   44.20
 -18  -8  10  116.69   59.09
 -18   8  10  150.58   50.19
  18   8 -10   34.60   35.90
 -16  -8  10   -7.00   51.79
 -16   8  10  163.78   48.30
  16   8 -10  135.69   38.00
 -14  -8  10   76.39   52.29
 -14   8  10  142.19   42.50
  14   8 -10  127.39   34.20
 -12  -8  10   56.99   50.79
 -12   8  10   73.69   35.10
  12   8 -10   58.19   29.90
 -10  -8  10  139.29   55.99
  10   8 -10  131.19   32.30
  -8  -8  10   32.80   53.39
  -8   8  10   52.39   33.80
   8   8 -10   -3.30   23.10
  -6  -8  10   43.60   55.89
   6   8 -10  -21.50   21.70
  -6   8  10  -13.80   33.70
  -4  -8  10  -23.00   55.89
   4   8 -10  -39.50   19.60
  -4   8  10   61.39   38.30
  -2  -8  10   27.00   60.69
   2   8 -10   35.60   21.80
  -2   8  10   15.70   39.70
   0  -8  10    6.80   59.69
   0   8  10  -62.39   39.20
   0   8 -10    8.70   21.60
   2  -8  10  -40.10   59.29
  -2   8 -10  -10.50   20.80
   2   8  10   31.40   43.10
   4  -8  10    9.60   61.09
  -4   8 -10   50.49   25.80
   4   8  10   51.69   43.60
   6  -8  10   53.49   65.99
   6   8  10   75.99   43.80
  -6   8 -10   24.10   25.70
   8  -8  10   95.59   68.69
   8   8  10  142.59   51.79
  -8   8 -10   84.79   51.39
  -8   8 -10  123.29   32.90
  10  -8  10   15.70   67.19
 -10   8 -10    7.30   50.59
  10   8  10   16.60   50.89
 -10   8 -10   38.20   26.80
  12  -8  10   91.29   71.89
  12   8  10  -20.50   48.70
 -12   8 -10  -67.39   46.30
 -23  -9  10  -55.09   62.09
 -23   9  10   92.19   53.49
 -21  -9  10  -79.89   54.29
  21   9 -10  -69.59   41.00
 -21   9  10   23.70   48.80
 -19  -9  10   15.90   57.39
  19   9 -10  -45.90   39.10
 -19   9  10   75.19   51.19
 -17  -9  10 -118.69   48.50
 -17   9  10   77.39   44.20
  17   9 -10  -35.40   36.20
 -15  -9  10  -84.29   48.80
  15   9 -10  -14.40   32.60
 -15   9  10   65.19   40.60
 -13  -9  10  -51.19   51.29
  13   9 -10   -6.40   28.80
 -13   9  10    4.80   35.10
 -11  -9  10  -62.49   50.89
  11   9 -10    2.20   27.50
  -9  -9  10  -29.00   54.99
   9   9 -10    4.40   25.50
  -7  -9  10   34.00   54.19
   7   9 -10   17.90   25.40
  -7   9  10    4.50   34.80
  -5  -9  10   71.39   63.09
   5   9 -10   54.29   25.50
  -5   9  10   27.50   37.40
  -3  -9  10   48.20   60.29
   3   9 -10  100.09   28.50
  -3   9  10   68.69   40.30
  -1  -9  10   75.29   64.79
   1   9 -10   88.29   29.20
  -1   9  10  111.09   44.70
   1  -9  10   16.30   63.09
  -1   9 -10   53.49   28.00
   1   9  10  -44.80   42.20
   3  -9  10    5.80   65.89
  -3   9 -10   15.20   24.90
   3   9  10   21.10   44.90
   5  -9  10   36.10   67.19
   5   9  10    5.10   46.10
  -5   9 -10  -20.00   22.90
   7  -9  10   33.80   69.79
   7   9  10   10.50   45.50
  -7   9 -10  -19.70   24.00
   9  -9  10   42.30   69.69
   9   9  10  -28.70   47.40
  -9   9 -10  -10.30   26.30
  11  -9  10  165.78   75.69
 -11   9 -10  -93.99   50.79
  11   9  10   -2.10   52.19
 -20 -10  10  -84.39   59.89
  20 -10 -10  153.68   56.59
 -20  10  10   16.90   45.80
  20  10 -10  -32.00   44.00
 -18 -10  10  -57.59   60.09
  18 -10 -10  172.08   54.89
  18  10 -10  -72.49   36.00
 -18  10  10   33.70   44.40
  16 -10 -10  128.69   53.39
 -16 -10  10  -79.59   56.19
  16  10 -10  -24.10   38.10
 -16  10  10   63.19   44.60
 -14 -10  10  -36.80   58.89
  14  10 -10   35.60   37.50
 -12 -10  10  -81.79   53.99
  12  10 -10   28.70   31.30
 -10 -10  10   -8.30   58.59
  10  10 -10  -17.70   28.40
  -8 -10  10   -2.50   55.59
   8  10 -10  -25.00   25.90
  -6 -10  10   87.39   64.89
  -6  10  10   48.50   39.70
   6  10 -10  149.99   34.60
  -4 -10  10  211.78   69.99
   4  10 -10  255.17   37.50
  -4  10  10  249.88   49.00
  -2 -10  10   84.69   66.19
  -2  10  10   51.79   43.90
   2  10 -10   89.99   29.90
   0 -10  10   53.29   68.29
   0  10 -10  173.78   34.60
   0  10  10  188.68   51.59
   2 -10  10   41.50   68.09
  -2  10 -10   22.80   27.20
   2  10  10  -19.10   44.10
   4 -10  10   35.10   75.79
   4  10  10   16.50   47.60
  -4  10 -10  -11.50   24.60
   6 -10  10   12.60   73.09
   6  10  10   61.19   51.89
  -6  10 -10   12.80   27.10
   8 -10  10   60.19   73.89
  -8  10 -10  -14.70   25.80
   8  10  10  -71.99   48.40
  10 -10  10  107.39   74.79
  10  10  10  -78.19   52.69
 -19 -11  10 -159.38   60.79
  19 -11 -10  114.79   58.19
 -19  11  10    1.30   47.50
  19  11 -10  -72.99   43.10
 -17 -11  10 -114.89   62.59
  17  11 -10  -83.19   38.60
 -17  11  10   11.90   61.89
 -15 -11  10  -45.60   64.09
  15  11 -10  -68.79   38.50
 -13 -11  10  -34.60   64.89
  13  11 -10    6.70   36.10
 -11 -11  10  -54.49   59.99
  11  11 -10   -5.80   32.70
  -9 -11  10  -26.30   63.99
   9  11 -10  -23.20   30.60
  -7 -11  10  -10.60   61.99
   7  11 -10   22.20   28.80
  -5 -11  10   -5.00   68.89
  -5  11  10  126.79   44.60
   5  11 -10  111.99   33.70
  -3 -11  10  137.89   72.89
  -3  11  10  101.89   45.40
   3  11 -10   86.29   33.30
  -1 -11  10   71.49   73.89
   1  11 -10   49.30   30.70
  -1  11  10   48.40   48.10
   1 -11  10   17.40   74.59
  -1  11 -10   38.80   30.30
   1  11  10   -3.20   47.50
   3 -11  10  -20.30   74.09
  -3  11 -10  -34.00   26.00
   3  11  10  -78.59   48.10
   5 -11  10 -165.38   70.39
   5  11  10   29.70   53.39
  -5  11 -10  -19.00   25.00
   7 -11  10   56.29   80.99
   7  11  10   -3.80   56.09
  -7  11 -10   -3.10   27.00
 -16 -12  10  -95.89   66.89
  16  12 -10  -59.09   44.60
 -14 -12  10 -144.29   64.79
  14  12 -10  -73.99   38.50
 -12 -12  10 -113.39   63.59
  12  12 -10    2.80   37.60
 -10 -12  10  -79.19   65.39
  10  12 -10   20.20   38.70
  -8 -12  10  -60.79   67.59
   8  12 -10  -29.70   29.30
  -6 -12  10  -36.90   68.79
   6  12 -10  -35.30   29.50
  -4 -12  10  -49.30   74.39
  -4  12  10   20.20   42.20
   4  12 -10   19.30   29.90
  -2 -12  10 -129.39   69.09
   2  12 -10   -5.40   29.40
  -2  12  10  -32.50   44.20
   0 -12  10  -72.69   75.09
   0  12  10  -72.29   45.40
   0  12 -10   -4.10   26.10
   2 -12  10  -82.69   72.69
   2  12  10  -29.60   49.00
  -2  12 -10    6.70   28.80
   4 -12  10   40.80   83.29
  -4  12 -10  -31.30   27.10
   4  12  10 -117.79   48.20
 -11 -13  10 -119.99   68.79
  11  13 -10  -29.30   37.30
   9  13 -10   21.20   38.60
  -7 -13  10 -100.69   73.49
   7  13 -10    4.80   35.00
  -5 -13  10  -78.99   76.59
   5  13 -10  -22.70   31.90
  -3 -13  10 -129.99   75.09
   3  13 -10   -8.80   31.30
  -3  13  10 -119.89   41.80
  -1 -13  10  -90.39   77.39
   1  13 -10  -13.70   30.70
  -1  13  10   -6.10   48.10
   1 -13  10  -85.29   80.19
  -1  13 -10   -0.80   31.80
   1  13  10 -102.19   48.30
 -28   0  11   43.00   46.20
 -26   0  11   30.20   47.10
 -24   0  11   18.90   41.90
 -22   0  11   -3.80   35.40
 -20   0  11   33.60   34.90
 -18   0  11   29.70   33.90
 -16   0  11   14.70   29.70
 -14   0  11   -8.60   23.90
  14   0 -11    9.80   14.50
  12   0 -11  -21.00   12.80
 -12   0  11    4.00   24.00
  10   0 -11   -0.50   14.30
 -10   0  11    0.80   21.50
  -8   0  11   42.70   22.30
   8   0 -11   -8.20   13.60
   6   0 -11   14.90   13.80
  -6   0  11   25.00   17.60
  -6   0  11   32.70   20.70
   4   0 -11   -5.00   13.60
  -4   0  11    5.70   15.60
  -2   0  11  -16.80   14.00
   2   0 -11  -16.20   12.40
   0   0  11    8.90   17.40
   0   0 -11   11.30   14.80
   2   0  11   10.20   18.30
  -2   0 -11    8.40   15.60
  -4   0 -11    6.00   17.10
   4   0  11    6.40   22.40
  -6   0 -11   14.10   19.20
   6   0  11   -4.10   25.50
  -8   0 -11   -9.90   19.70
   8   0  11    3.70   28.60
 -10   0 -11   -7.50   24.30
  10   0  11   19.50   34.50
 -12   0 -11  -20.60   25.90
  12   0  11   34.00   40.00
  14   0  11    5.40   40.50
 -14   0 -11   -5.20   32.00
  16   0  11   67.49   44.40
 -29   1  11   44.70   49.90
 -27  -1  11   46.50   48.70
 -27   1  11  -16.70   41.80
 -25  -1  11  -21.40   44.20
 -25   1  11   21.70   40.70
 -23  -1  11   57.79   43.80
 -23   1  11   34.90   41.70
 -21  -1  11  182.88   48.30
 -21   1  11  201.78   50.59
 -19  -1  11  330.67   52.99
 -19   1  11  407.76   56.49
 -17  -1  11  336.67   49.60
 -17   1  11  335.67   48.60
 -15  -1  11  138.29   36.10
 -15   1  11  105.19   35.40
  15   1 -11  119.19   21.60
 -13  -1  11   24.10   25.80
  13  -1 -11   10.50   13.60
 -13   1  11   26.20   18.20
  13   1 -11   12.70   15.10
 -13   1  11   -8.70   22.80
  11  -1 -11  452.85   34.30
 -11  -1  11  472.65   48.50
  11   1 -11  495.75   34.90
 -11   1  11  458.15   37.60
 -11   1  11  458.55   44.30
   9  -1 -11  169.58   24.90
  -9  -1  11  237.88   35.70
   9   1 -11  171.18   23.70
  -9   1  11  156.18   25.00
  -9   1  11  177.78   30.40
  -7  -1  11  542.75   46.10
   7  -1 -11  565.04   37.20
  -7   1  11  512.85   38.90
   7   1 -11  572.34   36.70
  -7   1  11  532.45   38.90
   5  -1 -11   -3.10   14.90
  -5  -1  11   20.30   22.50
   5   1 -11   26.00   14.40
  -5   1  11   41.90   19.10
  -3  -1  11  -15.60   14.20
   3  -1 -11   12.80   14.60
  -3  -1  11   18.40   22.00
  -3   1  11   35.40   19.90
   3   1 -11   20.50   15.90
  -1  -1  11  367.66   37.40
   1  -1 -11  243.48   31.10
  -1  -1  11  319.57   37.20
  -1   1  11  261.07   33.10
   1   1 -11  267.47   30.30
  -1  -1 -11  443.56   39.40
   1  -1  11  431.26   40.80
  -1   1 -11  505.85   38.60
   1   1  11  488.75   44.20
  -3  -1 -11  527.75   44.10
   3  -1  11  522.15   45.20
   3   1  11  439.26   46.50
  -3   1 -11  507.35   40.40
  -5  -1 -11  419.16   44.50
   5  -1  11  379.56   44.10
  -5   1 -11  412.36   41.50
   5   1  11  381.36   45.40
   7  -1  11   67.89   32.10
  -7  -1 -11   73.69   26.50
   7   1  11   51.49   30.70
  -7   1 -11   45.10   23.70
  -9  -1 -11    1.10   22.10
   9  -1  11   -4.40   30.90
  -9   1 -11   40.50   25.20
   9   1  11   45.80   34.20
 -11  -1 -11  -41.20   24.30
  11  -1  11   15.10   35.70
 -11   1 -11   16.40   26.00
  11   1  11   24.00   37.80
  13  -1  11   63.59   41.60
 -13  -1 -11   30.50   33.10
  13   1  11   46.40   41.60
 -13   1 -11  -10.40   27.90
  15  -1  11   80.39   45.00
  15   1  11   27.90   43.80
 -15   1 -11   15.50   33.70
  17  -1  11   70.19   72.39
  17   1  11   29.60   45.00
 -28  -2  11  -40.30   33.50
 -28  -2  11  -29.50   46.80
 -28   2  11    7.40   44.30
 -26  -2  11   14.90   30.40
 -26  -2  11  -14.40   43.70
 -26   2  11    5.90   37.40
 -24  -2  11    6.00   30.00
 -24  -2  11  -31.20   39.30
 -24   2  11   26.00   38.20
 -22  -2  11  117.59   47.50
 -22   2  11   99.49   41.20
 -20  -2  11  698.93   71.29
 -20   2  11  656.53   66.39
 -18  -2  11  617.44   66.39
 -18   2  11  641.84   64.69
 -16  -2  11  548.05   62.59
  16   2 -11  517.95   36.70
 -16   2  11  460.15   57.09
 -14  -2  11   38.00   32.40
 -14   2  11   87.29   31.30
  14   2 -11   44.90   19.70
 -12  -2  11   20.60   29.00
  12  -2 -11   15.70   15.90
  12   2 -11    7.40   16.60
 -12   2  11  -33.80   21.20
 -12   2  11   42.30   21.80
  10  -2 -11  508.25   36.20
 -10  -2  11  512.15   53.59
 -10   2  11  450.55   42.80
 -10   2  11  519.65   42.60
  10   2 -11  491.25   36.00
   8  -2 -11  570.14   38.90
  -8  -2  11  567.44   51.49
  -8   2  11  543.85   39.50
   8   2 -11  518.65   36.40
  -8   2  11  531.15   43.50
  -6  -2  11   84.69   30.40
   6  -2 -11   65.89   20.80
  -6   2  11   80.39   24.40
   6   2 -11   90.89   20.60
   4  -2 -11   26.20   17.10
  -4  -2  11   11.30   26.60
   4   2 -11    0.00   13.60
  -4   2  11    5.00   19.70
  -2  -2  11  345.87   41.50
   2  -2 -11  280.67   34.20
   2   2 -11  303.67   31.90
  -2   2  11  301.17   35.90
   0  -2 -11 1236.08   58.19
   0  -2  11 1258.17   64.99
   0   2 -11 1328.87   54.69
   0   2  11 1192.68   59.19
   2  -2  11  404.86   42.90
  -2  -2 -11  462.35   43.10
   2  -2  11  451.85   56.09
   2   2  11  538.95   48.20
  -2   2 -11  526.05   41.00
   4  -2  11  740.73   53.29
  -4  -2 -11  767.92   52.59
   4  -2  11  720.63   63.99
  -4   2 -11  746.33   48.60
   4   2  11  717.43   56.59
   6  -2  11  363.16   50.19
  -6  -2 -11  419.16   46.00
   6  -2  11  424.76   47.40
  -6   2 -11  387.76   41.80
   6   2  11  403.96   48.20
  -8  -2 -11  109.89   32.70
   8  -2  11  122.19   37.30
  -8   2 -11  143.79   30.30
   8   2  11  142.19   41.10
  10  -2  11   46.20   36.20
 -10  -2 -11   -2.30   24.10
 -10   2 -11   14.00   24.10
  10   2  11   78.69   36.50
  12  -2  11  -23.90   35.10
  12   2  11   -0.20   40.00
 -12   2 -11   29.10   27.30
  14  -2  11   37.10   44.00
 -14   2 -11   11.10   32.00
  14   2  11   12.00   42.60
  16  -2  11   42.10   45.50
  16   2  11  106.29   47.10
 -27  -3  11    6.90   44.80
 -27   3  11  -21.50   40.50
 -25  -3  11  -26.60   40.40
 -25   3  11   -5.50   36.30
 -23  -3  11    9.70   30.30
 -23  -3  11  -35.00   39.40
 -23   3  11   30.70   34.10
 -21  -3  11   60.09   29.00
 -21  -3  11   67.29   41.40
 -21   3  11   94.29   41.30
 -19  -3  11  271.67   55.39
 -19   3  11  291.77   51.39
 -17  -3  11  284.57   49.80
  17   3 -11  347.97   34.30
 -17   3  11  312.77   48.80
 -15  -3  11  169.88   43.50
  15   3 -11  153.48   24.00
 -15   3  11  235.28   42.50
 -13  -3  11  109.59   37.70
 -13   3  11  138.59   37.50
  13   3 -11  156.18   24.90
 -11  -3  11   34.20   33.40
  11  -3 -11   -2.10   15.30
 -11   3  11    1.90   21.10
 -11   3  11  -18.00   22.10
  11   3 -11    9.50   16.10
   9  -3 -11    6.50   16.90
  -9  -3  11   33.00   31.70
  -9   3  11   25.60   20.90
  -9   3  11    3.50   22.00
   9   3 -11    8.10   16.00
  -7  -3  11   30.40   31.00
   7  -3 -11   14.80   18.00
   7   3 -11   15.80   16.00
  -7   3  11    7.80   21.90
   5  -3 -11   29.70   20.40
  -5  -3  11   56.19   34.40
  -5   3  11   26.90   25.40
   5   3 -11   17.50   15.40
   3  -3 -11  367.76   38.90
  -3  -3  11  370.26   46.40
   3   3 -11  326.47   34.10
  -3   3  11  314.77   38.90
  -1  -3  11  534.25   60.99
   1  -3 -11  536.25   44.40
   1   3 -11  612.64   42.20
  -1   3  11  597.54   51.49
  -1  -3 -11  481.45   44.40
   1  -3  11  511.25   62.89
  -1   3 -11  471.75   40.20
   1   3  11  504.95   50.99
   3  -3  11  232.58   46.00
  -3  -3 -11  213.68   35.00
   3  -3  11  249.38   36.00
  -3   3 -11  261.37   33.60
   3   3  11  193.98   35.80
   5  -3  11  269.47   40.20
  -5  -3 -11  201.68   34.30
   5  -3  11  323.37   52.09
  -5   3 -11  267.37   36.00
   5   3  11  283.77   42.90
   7  -3  11   67.89   41.20
   7  -3  11   91.79   33.80
  -7   3 -11   53.79   28.90
  -7   3 -11   49.40   24.70
   7   3  11   88.49   37.60
   9  -3  11  122.49   39.10
   9   3  11   61.99   37.00
  -9   3 -11   37.80   27.70
  11  -3  11   75.09   39.60
 -11   3 -11    1.50   26.30
  11   3  11   66.29   40.70
  13  -3  11   32.20   41.00
  13   3  11   47.20   44.70
 -13   3 -11    0.90   29.70
  15  -3  11   87.99   44.20
 -15   3 -11   10.60   35.70
  15   3  11   49.20   45.40
 -28   4  11    4.60   47.80
 -26  -4  11    3.90   49.90
 -26   4  11  -18.70   38.80
 -24  -4  11   66.79   49.40
 -24   4  11   15.80   37.90
 -22  -4  11  -68.69   36.30
 -22   4  11   -3.00   35.20
 -20  -4  11    3.60   40.40
 -20   4  11  -10.70   33.00
 -18  -4  11  -22.70   38.00
 -18   4  11   29.50   34.30
  18   4 -11   25.10   21.10
 -16  -4  11   36.60   38.30
 -16   4  11    7.20   31.10
  16   4 -11   -3.40   20.20
 -14  -4  11  182.18   46.60
  14   4 -11  134.89   25.30
 -14   4  11  155.48   37.90
 -12  -4  11  282.97   50.09
 -12   4  11  302.07   41.60
 -12   4  11  234.08   38.10
  12   4 -11  373.16   35.10
 -10  -4  11  488.55   63.29
 -10   4  11  487.75   44.80
 -10   4  11  455.55   43.10
  10   4 -11  494.85   38.30
  -8  -4  11  791.92   67.89
   8  -4 -11  772.02   45.80
   8   4 -11  767.22   44.50
  -8   4  11  728.73   50.89
   6  -4 -11  417.26   40.20
  -6  -4  11  363.66   51.79
   6   4 -11  369.36   35.50
  -6   4  11  348.87   40.10
  -4  -4  11  830.02   69.89
   4  -4 -11  754.72   48.80
  -4   4  11  818.12   56.09
   4   4 -11  789.92   45.90
  -2  -4  11  138.69   45.20
   2  -4 -11  156.78   28.50
   2   4 -11  176.98   25.80
  -2   4  11  249.48   38.10
   0  -4  11   58.19   41.90
   0   4 -11   42.30   19.80
   0   4  11   96.09   32.20
   2  -4  11  -27.80   40.00
   2   4  11   25.40   29.30
  -2   4 -11   18.50   18.30
   4  -4  11   28.80   45.00
  -4   4 -11   -4.10   19.80
   4   4  11    7.10   29.60
   6  -4  11   15.10   44.10
   6  -4  11  -31.80   26.70
   6   4  11   20.40   32.10
  -6   4 -11   16.30   23.10
   8  -4  11  103.89   38.90
   8  -4  11   90.09   44.70
  -8   4 -11   27.60   30.30
   8   4  11  102.09   40.60
  -8   4 -11   57.09   27.40
  10  -4  11  119.79   42.30
  10  -4  11  101.59   48.60
  10   4  11  107.39   44.40
 -10   4 -11   87.49   30.40
  12  -4  11  187.48   48.90
 -12   4 -11  137.29   38.10
  12   4  11  178.38   49.80
  14  -4  11  313.17   56.39
 -14   4 -11  148.19   38.70
  14   4  11  220.98   53.19
  16   4  11  127.09   49.70
 -27  -5  11  -16.00   50.69
 -27   5  11   30.00   50.19
 -25  -5  11  -80.09   43.70
 -25   5  11   33.30   44.00
 -23  -5  11  -57.49   44.20
 -23   5  11   -6.60   38.00
 -21  -5  11  -32.40   43.30
 -21   5  11   48.40   42.40
 -19  -5  11   -4.00   41.10
  19   5 -11    5.90   24.50
 -19   5  11   12.40   37.80
 -17  -5  11   19.60   39.60
 -17   5  11  -25.00   34.00
  17   5 -11  -20.20   20.40
 -15  -5  11   45.40   39.60
 -15   5  11  -24.20   30.20
  15   5 -11   10.60   21.50
 -13  -5  11  323.77   55.89
 -13   5  11  397.26   50.59
  13   5 -11  312.87   35.20
 -11  -5  11  696.23   75.09
 -11   5  11  804.32   54.29
 -11   5  11  660.83   45.60
  11   5 -11  745.63   46.10
  -9  -5  11 1216.38   82.09
   9   5 -11 1121.79   51.39
  -9   5  11 1113.59   55.29
  -7  -5  11 1095.79   82.89
   7   5 -11 1113.29   52.39
  -7   5  11 1194.68   60.39
  -5  -5  11  935.51   77.79
  -5   5  11  975.70   60.59
   5   5 -11  984.20   51.19
  -3  -5  11  375.96   58.99
   3   5 -11  173.18   26.80
  -3   5  11  290.47   41.50
  -1  -5  11  -36.00   43.50
   1   5 -11    4.90   15.80
  -1   5  11  -36.30   26.90
   1  -5  11   26.80   48.80
   1   5  11    6.70   32.00
  -1   5 -11    6.10   17.80
   3  -5  11  314.37   62.99
   3   5  11  286.47   46.70
  -3   5 -11  264.97   35.60
   5  -5  11  -23.40   46.60
  -5   5 -11   10.90   21.20
   5   5  11   20.40   31.70
   7  -5  11   44.40   33.20
   7  -5  11   68.99   49.00
   7   5  11   46.90   37.90
  -7   5 -11   23.00   24.80
   9  -5  11  160.68   44.40
   9  -5  11  131.89   52.19
  -9   5 -11   75.19   31.20
  -9   5 -11   95.59   40.70
   9   5  11  133.49   45.20
  11  -5  11  256.07   61.69
  11  -5  11  334.17   53.59
  11   5  11  221.08   51.59
 -11   5 -11  190.28   39.70
 -11   5 -11  216.38   54.59
  13  -5  11  352.26   57.29
  13   5  11  282.87   57.79
 -13   5 -11  229.58   43.90
  15   5  11  228.88   56.99
 -26  -6  11   -5.70   56.19
 -26   6  11   54.59   48.30
 -24  -6  11  -42.70   51.59
 -24   6  11   18.00   44.90
 -22  -6  11  -34.40   45.50
 -22   6  11   14.90   44.40
 -20  -6  11   61.99   52.39
 -20   6  11    9.30   41.90
  20   6 -11   20.50   33.10
 -18  -6  11  -12.40   41.40
  18   6 -11   10.00   25.60
 -18   6  11   37.60   41.80
 -16  -6  11   88.49   45.10
  16   6 -11   50.49   27.10
 -16   6  11   74.79   44.40
 -14  -6  11  106.29   49.30
 -14   6  11  127.99   40.90
  14   6 -11   85.39   27.10
 -12  -6  11  149.99   51.09
 -12   6  11  158.38   38.70
  12   6 -11  166.88   30.00
 -10  -6  11  677.03   78.99
  10   6 -11  594.04   46.20
 -10   6  11  555.24   49.50
 -10   6  11  680.53   50.09
  -8  -6  11  744.23   83.29
   8   6 -11  798.22   48.20
  -8   6  11  755.12   53.79
  -6  -6  11  607.54   81.29
  -6   6  11  725.83   56.79
   6   6 -11  589.04   44.50
  -4  -6  11  338.87   63.49
   4   6 -11  249.18   33.10
  -4   6  11  332.27   44.30
  -2  -6  11   60.39   52.99
   2   6 -11   40.20   21.60
  -2   6  11   71.39   38.10
   0  -6  11  -46.30   52.39
   0   6 -11  -12.80   17.50
   0   6  11   -4.40   37.00
   2  -6  11  -40.00   55.09
  -2   6 -11   -5.00   20.10
   2   6  11  -22.00   36.00
   4  -6  11  192.98   61.09
   4   6  11  132.99   42.90
  -4   6 -11   82.89   27.40
   6  -6  11   74.89   56.29
  -6   6 -11   64.19   27.10
   6   6  11   92.99   39.20
   8  -6  11  176.88   59.99
   8   6  11  131.39   47.80
  -8   6 -11   83.69   31.20
  -8   6 -11   39.70   41.80
  10  -6  11  105.19   60.89
  10  -6  11  136.09   43.50
  10   6  11  139.59   47.30
 -10   6 -11   98.59   35.10
 -10   6 -11   55.89   46.70
  12  -6  11  186.88   69.79
  12  -6  11  202.68   50.69
 -12   6 -11  166.68   54.29
  12   6  11  223.58   54.79
 -12   6 -11   99.29   34.50
  14   6  11  124.89   55.19
 -25  -7  11 -109.59   53.09
 -25   7  11    8.40   48.30
 -23  -7  11   -0.90   55.49
 -23   7  11   14.10   49.10
 -21  -7  11  -30.70   51.89
 -21   7  11   56.49   48.70
 -19  -7  11    5.70   48.60
 -19   7  11   61.69   46.20
  19   7 -11   20.60   30.50
 -17  -7  11   93.09   51.39
 -17   7  11  189.68   49.99
  17   7 -11   88.89   32.40
 -15  -7  11  -60.39   42.60
 -15   7  11    7.20   37.90
  15   7 -11  -26.60   24.60
 -13  -7  11   -0.10   44.30
 -13   7  11  -32.80   32.90
  13   7 -11  -18.10   23.30
 -11  -7  11   -3.90   49.10
  11   7 -11  -25.90   23.00
 -11   7  11   34.30   42.10
  -9  -7  11   95.39   53.59
  -9   7  11  108.89   34.50
   9   7 -11   62.09   27.30
  -7  -7  11   -1.80   48.90
  -7   7  11   85.29   35.80
   7   7 -11   26.00   23.80
  -5  -7  11   56.89   57.59
   5   7 -11   85.59   25.40
  -5   7  11  123.79   40.00
  -3  -7  11   67.89   58.49
  -3   7  11   65.69   40.20
   3   7 -11   65.19   24.80
  -1  -7  11   24.60   58.49
   1   7 -11   79.19   24.40
  -1   7  11   61.49   41.80
   1  -7  11  159.88   64.09
   1   7  11  109.99   45.50
  -1   7 -11   95.59   26.10
   3  -7  11  -31.50   57.09
   3   7  11    1.60   37.70
  -3   7 -11  -16.00   20.40
   5  -7  11   33.00   60.39
  -5   7 -11   29.20   25.40
   5   7  11   61.89   41.90
   7  -7  11   45.50   61.69
   7   7  11   -0.90   41.50
  -7   7 -11   34.00   26.70
   9  -7  11  215.78   70.59
  -9   7 -11  159.28   55.09
   9   7  11  141.79   52.79
  -9   7 -11  122.79   35.30
  11  -7  11  -13.00   42.50
  11  -7  11  111.89   64.99
 -11   7 -11   -7.70   46.90
  11   7  11  -31.80   47.10
 -11   7 -11   53.59   32.10
  13  -7  11   88.29   69.49
  13   7  11  -32.10   51.09
 -13   7 -11    4.20   53.59
 -24  -8  11  -30.40   58.59
 -24   8  11   55.39   52.89
 -22  -8  11   38.70   63.09
 -22   8  11  142.09   57.09
 -20  -8  11   59.69   58.09
 -20   8  11   39.00   48.50
  20   8 -11   28.30   36.10
 -18  -8  11  170.98   62.19
 -18   8  11  334.67   59.89
  18   8 -11  231.18   41.50
 -16  -8  11    7.90   54.59
  16   8 -11   81.29   35.20
 -16   8  11  162.08   49.00
 -14  -8  11  -55.59   45.60
 -14   8  11   58.79   38.70
  14   8 -11   -4.90   27.70
 -12  -8  11  -87.39   45.40
  12   8 -11  -48.10   24.70
 -10  -8  11   67.99   54.29
  10   8 -11   81.79   30.30
  -8  -8  11   74.09   57.49
   8   8 -11   48.10   27.00
  -8   8  11  -10.10   33.40
  -6  -8  11   -4.10   54.49
   6   8 -11  -17.10   22.20
  -6   8  11   74.99   38.30
  -4  -8  11   55.69   60.19
   4   8 -11    6.80   21.80
  -4   8  11  -34.90   37.10
  -2  -8  11   85.19   64.29
  -2   8  11  -37.30   38.60
   2   8 -11   50.59   26.00
   0  -8  11  212.98   68.89
   0   8  11  154.38   48.20
   0   8 -11  117.29   29.20
   2  -8  11  444.16   79.59
  -2   8 -11  238.48   36.40
   2   8  11  292.57   53.09
   4  -8  11  -28.90   61.49
   4   8  11   45.30   45.10
  -4   8 -11   31.00   25.40
   6  -8  11  107.59   71.89
   6   8  11   58.49   49.80
  -6   8 -11   80.49   30.70
   8  -8  11   88.49   71.19
  -8   8 -11   18.80   27.60
   8   8  11  -12.60   45.90
  10  -8  11  170.28   75.19
  10   8  11   29.60   50.69
 -10   8 -11  -40.80   26.30
  12  -8  11   74.19   71.39
  12   8  11  -24.30   51.39
 -12   8 -11 -100.29   51.19
 -21  -9  11    2.30   62.99
  21   9 -11    2.40   41.10
 -21   9  11  111.99   55.79
 -19  -9  11   54.89   62.69
 -19   9  11  140.59   53.29
  19   9 -11   82.49   43.10
 -17  -9  11   74.69   62.69
  17   9 -11  113.59   38.90
 -17   9  11  199.48   51.89
 -15  -9  11  -30.40   52.29
  15   9 -11   10.10   32.70
 -15   9  11   94.59   65.99
 -13  -9  11  -86.39   49.60
  13   9 -11  -17.60   30.00
 -11  -9  11  -26.10   54.99
  11   9 -11   13.90   29.40
  -9  -9  11   79.99   61.09
   9   9 -11   96.89   30.60
  -7  -9  11   64.19   58.39
  -7   9  11   72.39   38.70
   7   9 -11   85.89   30.40
  -5  -9  11  -56.49   57.69
  -5   9  11  -39.50   37.70
   5   9 -11   -5.90   24.20
  -3  -9  11  -54.29   57.49
  -3   9  11  -61.09   39.20
   3   9 -11   -2.50   22.80
  -1  -9  11   98.69   67.19
   1   9 -11  107.09   30.30
  -1   9  11  116.89   47.70
   1  -9  11   95.29   66.09
  -1   9 -11   73.99   29.20
   1   9  11  136.69   49.20
   3  -9  11   63.09   72.49
   3   9  11   21.20   45.50
  -3   9 -11   54.29   28.90
   5  -9  11   15.90   72.59
   5   9  11   42.10   48.90
  -5   9 -11   40.70   28.80
   7  -9  11  -24.50   68.99
  -7   9 -11   12.30   27.30
   7   9  11   33.90   52.59
   9  -9  11  -27.60   72.29
   9   9  11   43.30   51.79
  -9   9 -11  -13.10   26.70
  11   9  11  -11.30   53.79
 -20 -10  11  -37.00   59.69
  20 -10 -11  189.68   58.99
 -20  10  11   70.79   50.89
  20  10 -11  -17.40   43.50
 -18 -10  11  -84.39   60.79
 -18  10  11   -9.80   44.10
  18  10 -11  -50.99   35.90
 -16 -10  11  -78.19   56.39
  16  10 -11  -12.50   35.50
 -14 -10  11 -143.39   51.69
  14  10 -11  -53.89   32.60
 -12 -10  11  -78.69   55.69
  12  10 -11    7.00   31.00
 -10 -10  11  -29.50   54.49
  10  10 -11   37.90   29.30
  -8 -10  11  -79.89   54.89
   8  10 -11    6.00   28.30
  -6 -10  11 -115.69   55.79
   6  10 -11   33.70   28.90
  -6  10  11  -44.90   39.10
  -4 -10  11 -116.99   60.99
  -4  10  11  -29.90   41.40
   4  10 -11  -22.60   24.20
  -2 -10  11  -90.29   65.29
   2  10 -11  -15.90   24.20
  -2  10  11   34.40   46.30
   0 -10  11  -78.89   66.89
   0  10  11   -5.70   45.60
   0  10 -11   17.70   28.00
   2 -10  11  -83.29   67.89
  -2  10 -11  -37.30   22.80
   2  10  11    5.90   47.10
   4 -10  11  -69.59   71.69
   4  10  11  -58.89   48.00
  -4  10 -11   -4.70   25.00
   6 -10  11  -35.40   75.09
  -6  10 -11    4.40   26.60
   6  10  11  -83.79   48.30
   8 -10  11   81.39   78.39
   8  10  11    1.00   53.59
  -8  10 -11   17.10   28.80
 -17 -11  11  -95.69   64.19
  17  11 -11   -1.90   40.50
 -15 -11  11 -140.09   59.89
  15  11 -11  -32.50   37.70
 -13 -11  11 -145.99   57.69
  13  11 -11  -50.69   34.70
 -11 -11  11 -101.89   62.09
  11  11 -11  -20.10   32.70
  -9 -11  11  -91.09   64.29
   9  11 -11  -45.70   29.20
  -7 -11  11  -37.60   63.49
   7  11 -11  -11.90   29.80
  -5 -11  11  -65.09   67.09
   5  11 -11   18.20   31.50
  -5  11  11  -44.50   40.80
  -3 -11  11 -107.79   63.69
  -3  11  11  -62.69   43.60
   3  11 -11    4.60   27.00
  -1 -11  11  -32.30   73.39
  -1  11  11   17.30   46.60
   1  11 -11   35.10   30.90
   1 -11  11   17.80   79.09
   1  11  11   28.90   52.69
  -1  11 -11   44.20   30.40
   3 -11  11   65.59   80.19
   3  11  11 -110.19   47.70
  -3  11 -11    4.40   28.10
   5 -11  11  -50.99   78.49
  -5  11 -11  -21.20   27.20
   5  11  11  -90.49   52.59
 -14 -12  11 -107.99   66.89
  14  12 -11  -36.10   40.50
 -12 -12  11  -49.30   70.29
  12  12 -11  -50.29   38.30
 -10 -12  11 -174.38   63.19
  10  12 -11  -56.69   34.10
  -8 -12  11  -12.50   71.49
   8  12 -11   21.00   33.60
  -6 -12  11  -97.79   66.99
   6  12 -11  -22.20   27.70
  -4  12  11 -112.29   41.10
   4  12 -11  -57.79   29.00
  -2 -12  11 -127.39   72.49
   2  12 -11   23.00   30.30
  -2  12  11  -74.99   44.00
   0 -12  11  -30.70   77.79
   0  12 -11   21.00   31.70
   0  12  11  -53.49   49.80
   2 -12  11   85.59   85.19
   2  12  11  -29.30   55.49
  -2  12 -11   59.79   34.40
  -9 -13  11 -112.79   75.29
   9  13 -11  -31.50   34.80
  -7 -13  11 -154.18   68.69
   7  13 -11  -24.20   29.80
  -5 -13  11 -159.98   75.49
   5  13 -11  -51.89   31.40
  -3 -13  11 -118.79   79.59
   3  13 -11   20.40   34.70
  -3  13  11  -52.19   46.40
 -28   0  12   22.00   47.70
 -26   0  12   77.49   49.30
 -24   0  12  122.39   51.89
 -22   0  12  249.88   54.19
 -20   0  12   42.70   39.20
 -18   0  12   21.70   34.80
 -16   0  12  255.27   46.30
 -14   0  12  553.04   56.49
  14   0 -12  525.05   37.40
  12   0 -12 1036.80   46.50
 -12   0  12 1037.30   62.59
 -10   0  12  220.38   38.40
  10   0 -12  173.08   25.80
  -8   0  12  106.29   25.00
  -8   0  12  166.48   31.00
   8   0 -12  136.69   23.90
   6   0 -12  107.49   22.70
  -6   0  12  100.89   25.10
  -6   0  12  147.39   29.70
   4   0 -12  376.96   36.30
  -4   0  12  417.26   41.20
  -2   0  12  565.94   44.20
   2   0 -12  564.04   41.20
   0   0 -12  263.97   33.70
   0   0  12  274.67   35.30
  -2   0 -12   62.09   21.70
   2   0  12   41.70   23.40
   4   0  12   42.00   28.00
  -4   0 -12   34.70   21.40
   6   0  12  233.98   43.70
  -6   0 -12  187.98   34.70
   8   0  12  197.98   43.20
  -8   0 -12  116.09   32.30
 -10   0 -12  320.27   45.90
  10   0  12  543.55   63.39
 -12   0 -12   69.59   34.40
  12   0  12  131.99   46.30
 -14   0 -12    9.20   34.90
  14   0  12  106.39   48.70
  16   0  12   63.29   49.40
 -27  -1  12    0.80   48.90
 -27   1  12   -6.60   43.10
 -25  -1  12   21.80   44.70
 -25   1  12   10.70   38.10
 -23  -1  12  101.49   49.50
 -23   1  12  127.19   49.99
 -21  -1  12    0.30   39.00
 -21   1  12   45.00   42.20
 -19  -1  12   22.10   36.70
 -19   1  12   -2.60   34.80
 -17  -1  12   33.60   34.40
 -17   1  12    3.10   33.50
 -15  -1  12   91.19   36.90
 -15   1  12  122.89   36.00
  15   1 -12   92.89   22.90
 -13  -1  12  619.54   58.89
  13  -1 -12  505.65   37.30
  13   1 -12  571.64   40.50
 -13   1  12  565.24   43.00
 -13   1  12  520.65   52.09
  11  -1 -12   51.09   19.60
 -11  -1  12   66.49   32.10
 -11   1  12   48.40   25.40
 -11   1  12   87.89   24.50
  11   1 -12   56.49   19.50
  -9  -1  12  180.98   35.70
   9  -1 -12  145.09   24.40
  -9   1  12  158.08   28.40
  -9   1  12  147.99   29.70
   9   1 -12  155.68   24.90
   7  -1 -12  -21.70   13.90
  -7  -1  12    4.30   24.90
   7   1 -12   -2.20   14.80
  -7   1  12    4.00   19.90
   5  -1 -12   82.59   22.70
  -5  -1  12   72.49   28.70
   5   1 -12   43.80   18.90
  -5   1  12   60.09   24.00
  -3  -1  12  114.09   26.00
  -3  -1  12  151.28   31.60
   3  -1 -12   69.99   21.00
  -3   1  12  140.59   28.40
   3   1 -12  109.69   22.60
  -1  -1  12  178.48   30.40
   1  -1 -12  142.39   27.60
  -1   1  12  121.69   29.70
   1   1 -12  121.89   25.20
   1  -1  12   94.09   24.70
  -1  -1 -12   83.39   24.00
   1   1  12  135.59   30.50
  -1   1 -12   38.00   18.40
  -3  -1 -12    7.00   18.40
   3  -1  12    2.70   21.20
  -3   1 -12   13.50   17.90
   3   1  12    0.20   21.80
   5  -1  12   48.50   28.50
  -5  -1 -12   51.19   25.20
  -5   1 -12   31.40   21.70
   5   1  12   11.50   27.80
  -7  -1 -12  120.89   31.40
   7  -1  12  204.98   41.60
   7   1  12  189.48   41.20
  -7   1 -12   95.69   27.40
  -9  -1 -12   54.79   28.90
   9  -1  12   34.70   37.90
   9   1  12   98.09   39.50
  -9   1 -12   41.60   27.20
  11  -1  12  224.68   51.19
 -11  -1 -12   84.29   36.10
  11   1  12  196.88   48.80
 -11   1 -12   94.59   34.40
  13  -1  12  132.29   49.20
 -13  -1 -12   36.40   33.80
  13   1  12   35.40   40.60
 -13   1 -12   30.40   36.40
  15  -1  12   42.30   46.70
  15   1  12   37.60   44.70
 -15   1 -12   -5.50   35.20
 -28  -2  12  -38.40   47.60
 -28   2  12   -0.50   42.10
 -26  -2  12  -21.90   43.30
 -26   2  12   57.69   45.30
 -24  -2  12   22.30   45.00
 -24   2  12   24.80   37.60
 -22  -2  12  -12.80   39.20
 -22   2  12   -6.90   34.10
 -20  -2  12  -12.90   37.80
 -20   2  12   -8.00   37.40
 -18  -2  12  -37.90   34.70
 -18   2  12   11.80   35.50
 -16  -2  12   17.70   34.70
  16   2 -12    3.10   18.40
 -16   2  12    1.80   32.60
 -14  -2  12   22.70   33.00
  14   2 -12   -1.00   16.80
 -14   2  12   15.90   27.80
  12  -2 -12    6.20   18.80
 -12  -2  12   54.89   32.60
 -12   2  12   11.60   23.70
 -12   2  12   24.70   26.40
  12   2 -12  -17.80   15.80
 -10  -2  12   44.10   32.90
  10  -2 -12   64.39   22.30
 -10   2  12   70.49   26.70
  10   2 -12   49.00   19.40
 -10   2  12   51.69   25.80
   8  -2 -12   15.60   19.10
  -8  -2  12   54.59   32.10
  -8   2  12   25.60   25.80
   8   2 -12    7.60   17.00
   6  -2 -12   68.49   23.10
  -6  -2  12   78.29   33.50
   6   2 -12   41.50   18.70
  -6   2  12   54.49   27.50
  -4  -2  12   49.60   31.20
   4  -2 -12   30.50   19.50
  -4   2  12   54.89   26.30
   4   2 -12   21.60   16.90
  -2  -2  12   91.99   35.30
   2  -2 -12   78.39   23.20
  -2   2  12   52.69   25.50
   2   2 -12   71.29   21.60
   0  -2  12  161.98   40.20
   0  -2 -12  134.59   28.50
   0  -2  12  130.89   26.90
   0   2 -12  128.79   25.00
   0   2  12  116.79   29.10
  -2  -2 -12   31.40   21.80
   2  -2  12   52.99   25.60
   2  -2  12   83.69   39.50
  -2   2 -12   72.19   23.20
   2   2  12   51.09   28.10
   4  -2  12   -0.30   24.00
  -4  -2 -12  -20.30   17.90
   4  -2  12  -30.20   42.00
   4   2  12  -19.30   24.20
  -4   2 -12   14.30   18.40
   6  -2  12  -16.60   26.70
  -6  -2 -12    3.70   21.90
  -6   2 -12   -1.10   19.80
   6   2  12   -1.50   28.50
  -8  -2 -12   23.70   25.50
   8  -2  12   60.39   37.00
   8   2  12   58.09   35.10
  -8   2 -12   27.60   25.20
  10  -2  12   19.90   37.50
 -10  -2 -12  -18.90   24.30
 -10   2 -12   21.40   25.60
  10   2  12   64.49   39.90
  12  -2  12    3.60   40.80
  12   2  12   64.79   43.00
 -12   2 -12   32.80   31.10
  14  -2  12   78.59   47.10
  14   2  12   95.59   46.70
 -14   2 -12    4.60   34.40
 -27  -3  12   12.10   49.00
 -27   3  12   -7.00   41.40
 -25  -3  12  164.68   60.59
 -25   3  12  117.29   47.80
 -23  -3  12   47.20   45.00
 -23   3  12   59.89   38.10
 -21  -3  12  -24.80   38.70
 -21   3  12   46.70   38.40
 -19  -3  12  -27.30   38.80
 -19   3  12  -14.80   30.60
 -17  -3  12  -15.10   35.90
  17   3 -12  -12.20   18.70
 -17   3  12   12.30   34.10
 -15  -3  12  198.48   48.80
 -15   3  12  216.28   43.20
  15   3 -12  234.38   30.60
  13  -3 -12  220.28   36.00
 -13  -3  12  248.58   48.80
 -13   3  12  293.37   43.40
  13   3 -12  228.88   29.60
 -11  -3  12  397.46   54.99
  11  -3 -12  333.57   37.70
 -11   3  12  289.27   36.10
  11   3 -12  350.46   35.50
 -11   3  12  318.17   42.10
   9  -3 -12  142.49   28.30
  -9  -3  12  192.28   44.10
   9   3 -12  163.18   25.70
  -9   3  12  179.38   33.80
  -9   3  12  168.78   30.40
   7  -3 -12  -11.70   18.00
  -7  -3  12   24.10   34.10
   7   3 -12   20.70   16.20
  -7   3  12    8.90   27.00
  -5  -3  12  348.17   50.19
   5  -3 -12  294.67   36.80
  -5   3  12  290.57   39.30
   5   3 -12  344.07   35.40
  -3  -3  12  291.87   46.10
   3  -3 -12  244.38   34.10
   3   3 -12  251.27   31.80
  -3   3  12  322.07   41.50
  -1  -3  12  279.77   48.60
   1  -3 -12  233.08   33.70
   1   3 -12  233.08   30.80
  -1   3  12  362.86   44.80
   1  -3  12 1018.80   74.69
  -1  -3 -12  895.51   57.09
   1   3  12  912.41   63.39
  -1   3 -12  987.10   53.79
   3  -3  12    5.00   25.10
   3  -3  12   12.10   41.60
  -3  -3 -12    1.80   20.80
   3   3  12   27.50   31.10
  -3   3 -12  -11.90   18.70
   5  -3  12  -25.10   40.40
  -5  -3 -12   16.80   20.60
   5  -3  12   -9.00   25.60
   5   3  12   -6.40   30.30
  -5   3 -12    7.80   23.40
   7  -3  12  209.88   42.70
  -7   3 -12  200.88   35.50
   7   3  12  251.67   44.60
   9  -3  12  157.78   45.60
  -9   3 -12  111.09   33.80
   9   3  12  141.39   43.20
  11  -3  12  111.09   43.80
  11   3  12  111.09   46.70
 -11   3 -12   13.80   27.80
  13  -3  12   62.59   44.80
  13   3  12   54.19   46.00
 -13   3 -12   26.60   32.70
  15  -3  12  114.99   47.20
 -15   3 -12    6.60   39.20
  15   3  12   60.89   48.10
 -26  -4  12  -11.10   49.10
 -26   4  12   53.39   46.30
 -24  -4  12   62.39   51.79
 -24   4  12  103.49   46.90
 -22  -4  12   41.10   47.30
 -22   4  12  108.39   44.30
 -20  -4  12  -63.29   40.20
 -20   4  12    9.00   36.70
 -18  -4  12  -19.70   40.30
 -18   4  12   -4.50   33.20
  18   4 -12  -10.60   19.90
 -16  -4  12   83.39   44.70
 -16   4  12   72.89   35.30
  16   4 -12   58.09   22.50
 -14  -4  12  161.58   50.09
  14   4 -12  148.09   26.50
 -14   4  12  150.38   38.40
 -12  -4  12  327.57   56.89
 -12   4  12  343.07   57.49
 -12   4  12  382.56   48.00
  12   4 -12  366.66   39.00
  10  -4 -12  169.78   28.30
 -10  -4  12  147.99   45.30
 -10   4  12  119.19   30.40
 -10   4  12  111.09   31.50
  10   4 -12  162.78   27.70
   8  -4 -12   57.19   23.80
  -8  -4  12    4.80   37.70
   8   4 -12   25.70   18.60
  -8   4  12   15.70   28.00
   6  -4 -12  146.19   30.90
  -6  -4  12  186.08   47.60
   6   4 -12  151.48   26.90
  -6   4  12  148.19   35.20
   4  -4 -12   48.50   24.90
  -4  -4  12   20.30   40.70
   4   4 -12   49.60   19.40
  -4   4  12   47.80   31.90
  -2  -4  12  365.76   56.49
   2  -4 -12  452.45   45.80
   2   4 -12  330.57   38.50
  -2   4  12  412.76   47.10
   0  -4 -12  271.77   37.50
   0  -4  12  316.97   56.59
   0   4  12  252.87   43.00
   0   4 -12  241.98   33.30
   2  -4  12  228.78   54.19
  -2   4 -12  178.48   30.30
   2   4  12  174.58   38.90
   4  -4  12   62.09   29.20
   4  -4  12  -61.39   42.10
  -4   4 -12    5.30   21.80
   4   4  12   29.70   31.30
   6  -4  12  202.88   42.80
   6  -4  12  168.48   50.99
  -6   4 -12  187.28   35.00
   6   4  12  128.79   39.70
   8  -4  12  130.59   65.89
   8  -4  12  155.28   44.10
  -8   4 -12   70.79   30.40
   8   4  12  133.89   43.00
  10  -4  12  134.69   46.20
  10   4  12  113.79   46.40
 -10   4 -12   75.99   32.80
  12  -4  12  128.19   48.20
  12   4  12   31.30   45.80
 -12   4 -12   54.69   35.70
  14  -4  12  150.68   49.50
 -14   4 -12    4.20   32.10
  14   4  12   69.19   49.10
 -27  -5  12   32.00   57.59
 -27   5  12  -53.79   41.90
 -25  -5  12  -28.70   52.39
 -25   5  12  -12.60   42.40
 -23  -5  12  -13.10   47.60
 -23   5  12    5.40   43.30
 -21  -5  12   -5.40   47.70
 -21   5  12    8.60   41.10
 -19  -5  12  -29.70   41.40
  19   5 -12    7.20   23.10
 -19   5  12  -32.60   35.30
 -17  -5  12   32.10   43.50
  17   5 -12   23.10   24.20
 -17   5  12   -1.30   35.30
 -15  -5  12    9.70   41.30
  15   5 -12   51.39   24.60
 -15   5  12   44.60   36.00
 -13  -5  12   37.50   44.80
 -13   5  12   26.90   32.40
  13   5 -12   37.90   21.30
 -11  -5  12    4.00   43.60
 -11   5  12  -15.90   27.80
  11   5 -12   -0.30   20.20
 -11   5  12    6.80   27.40
  -9  -5  12   54.39   45.40
  -9   5  12  -11.70   28.70
   9   5 -12    8.50   20.00
  -7  -5  12   39.60   48.30
  -7   5  12   -0.90   30.00
   7   5 -12  -12.60   18.40
  -5  -5  12   34.30   47.30
  -5   5  12   32.30   33.00
   5   5 -12   14.10   19.10
  -3  -5  12  -41.80   48.60
  -3   5  12   48.40   34.00
   3   5 -12    5.80   18.10
  -1  -5  12    1.60   48.80
   1   5 -12   22.50   19.60
  -1   5  12  -14.50   31.90
   1  -5  12   37.90   50.89
  -1   5 -12    4.80   20.60
   1   5  12   12.00   33.20
   3  -5  12   41.90   51.99
   3   5  12  -26.40   30.80
  -3   5 -12  -15.00   19.20
   5  -5  12   -0.20   48.70
   5   5  12   12.10   33.60
  -5   5 -12    6.20   23.30
   7  -5  12  -68.79   33.80
   7  -5  12   22.50   49.30
  -7   5 -12   -8.90   25.90
   7   5  12   11.70   38.80
   9  -5  12   63.79   53.39
   9  -5  12   28.00   41.20
  -9   5 -12    1.80   27.50
   9   5  12   68.99   44.30
  11  -5  12   94.49   42.90
  11   5  12   11.60   42.90
 -11   5 -12   30.40   30.20
  13  -5  12   93.89   47.70
 -13   5 -12   -1.80   31.70
  13   5  12   37.50   46.40
 -26  -6  12  -55.99   53.29
 -26   6  12   -2.40   48.40
 -24  -6  12  -55.39   50.19
 -24   6  12   13.10   47.60
 -22  -6  12  -47.10   47.60
 -22   6  12  -21.20   42.80
 -20  -6  12  -39.30   45.40
  20   6 -12   13.50   44.10
 -20   6  12   62.79   46.00
 -18  -6  12  -33.40   42.50
  18   6 -12   -6.10   24.20
 -18   6  12   23.70   40.10
 -16  -6  12   34.00   48.20
 -16   6  12   26.70   39.70
  16   6 -12   20.40   25.80
 -14  -6  12    9.00   46.00
  14   6 -12   38.50   26.80
 -14   6  12  -15.90   34.90
 -12  -6  12  165.78   54.09
 -12   6  12  197.48   41.20
  12   6 -12  188.08   32.90
 -10  -6  12  128.19   54.09
 -10   6  12   48.80   31.70
  10   6 -12    5.70   21.20
  -8  -6  12   57.49   52.89
   8   6 -12    4.70   21.00
  -8   6  12  -13.90   30.80
  -6  -6  12  -28.10   49.70
   6   6 -12   -3.90   22.60
  -6   6  12  -12.90   33.50
  -4  -6  12   73.09   59.09
   4   6 -12  104.09   26.60
  -4   6  12  114.79   40.90
  -2  -6  12  214.98   62.89
   2   6 -12  132.49   27.60
  -2   6  12  228.68   46.70
   0  -6  12    0.10   55.89
   0   6  12   43.60   38.70
   0   6 -12   36.50   23.00
   2  -6  12   -3.00   51.39
  -2   6 -12   43.60   25.80
   2   6  12   37.50   39.00
   4  -6  12  -51.29   50.79
  -4   6 -12   24.50   24.30
   4   6  12    2.60   36.30
   6  -6  12   28.40   57.29
   6   6  12    9.60   37.10
  -6   6 -12   32.20   25.80
   8  -6  12  104.09   61.39
   8  -6  12   44.00   40.60
  -8   6 -12   32.10   29.00
   8   6  12   65.39   44.30
  10  -6  12  120.29   61.69
  10  -6  12   43.30   40.60
  10   6  12   33.40   46.50
 -10   6 -12   12.10   31.60
  12  -6  12   21.90   44.60
  12   6  12   27.60   47.90
 -12   6 -12   17.50   31.50
 -25  -7  12  -10.80   59.99
 -25   7  12   18.40   55.29
 -23  -7  12   18.50   58.39
 -23   7  12  102.69   56.09
 -21  -7  12   -4.80   52.89
 -21   7  12   94.69   53.09
 -19  -7  12  -58.69   45.20
 -19   7  12   21.80   46.40
  19   7 -12  -52.39   26.90
 -17  -7  12   -7.70   47.20
  17   7 -12   82.19   30.40
 -17   7  12   63.79   45.80
 -15  -7  12   89.89   53.19
  15   7 -12   98.59   30.80
 -15   7  12  180.28   46.70
 -13  -7  12  118.09   54.29
  13   7 -12  172.18   32.20
 -11  -7  12  132.59   54.59
  11   7 -12  115.69   30.70
  -9  -7  12   86.69   55.59
  -9   7  12   72.99   34.70
   9   7 -12   74.79   25.50
  -7  -7  12   -2.40   52.49
   7   7 -12   10.10   22.40
  -7   7  12  -15.20   33.70
  -5  -7  12  133.19   61.09
  -5   7  12  106.29   41.00
  -3  -7  12  160.78   64.49
   3   7 -12  168.78   31.40
  -3   7  12  177.38   43.80
  -1  -7  12  245.28   66.59
  -1   7  12  250.17   49.40
   1   7 -12  239.78   34.50
   1  -7  12   79.09   60.09
   1   7  12   37.60   41.90
  -1   7 -12   73.59   27.20
   3  -7  12   -7.40   60.49
   3   7  12  -49.50   38.60
  -3   7 -12  -12.70   23.20
   5  -7  12  -10.70   61.29
  -5   7 -12   -1.50   25.60
   5   7  12    9.80   41.70
   7  -7  12   51.99   64.39
   7   7  12   52.69   46.10
  -7   7 -12   28.60   27.20
   9  -7  12   68.49   43.70
   9  -7  12   68.89   65.39
   9   7  12  107.59   51.59
  -9   7 -12   69.29   32.40
  11  -7  12  115.79   49.00
  11  -7  12  191.28   69.29
 -11   7 -12   64.49   37.00
  11   7  12   50.19   51.29
 -22  -8  12  -83.59   54.99
 -22   8  12   65.09   54.49
 -20  -8  12  -64.29   52.49
 -20   8  12   77.79   51.49
  20   8 -12  -69.09   31.50
 -18  -8  12  -45.30   50.69
 -18   8  12   27.90   44.90
  18   8 -12  -31.40   31.70
 -16  -8  12  -30.70   51.89
  16   8 -12  -12.70   28.30
 -16   8  12   44.10   46.70
 -14  -8  12   29.40   52.69
  14   8 -12   38.00   29.10
 -12  -8  12  -57.69   50.79
  12   8 -12   11.50   26.50
 -10  -8  12   -8.20   53.49
  10   8 -12   -8.10   24.50
  -8  -8  12  -28.70   55.59
  -8   8  12   11.90   34.20
   8   8 -12   17.00   24.20
  -6  -8  12   12.90   55.69
  -6   8  12   49.80   39.20
   6   8 -12   87.19   28.60
  -4  -8  12  -38.40   58.79
   4   8 -12    6.60   24.10
  -4   8  12  -24.00   38.10
  -2  -8  12   29.20   61.59
  -2   8  12  117.39   45.70
   2   8 -12   50.19   26.00
   0  -8  12  -10.20   63.19
   0   8  12  111.79   47.40
   0   8 -12   25.40   23.80
   2  -8  12   86.19   67.19
   2   8  12   22.00   48.30
  -2   8 -12   29.40   26.30
   4  -8  12   16.90   67.69
   4   8  12   15.60   45.40
  -4   8 -12    7.60   25.40
   6  -8  12   20.20   68.59
   6   8  12   17.70   47.60
  -6   8 -12   32.10   28.90
   8  -8  12   72.59   72.99
  -8   8 -12   14.50   27.20
   8   8  12   27.90   46.70
  10  -8  12   93.39   73.19
  10  -8  12   38.00   47.40
  10   8  12   63.49   56.99
 -10   8 -12  -48.20   26.80
 -21  -9  12  -51.69   60.39
 -21   9  12   74.99   53.79
  21   9 -12  -42.70   39.60
 -19  -9  12  -26.70   58.39
  19   9 -12   -7.00   39.20
 -19   9  12   89.09   50.89
 -17  -9  12 -108.29   54.79
  17   9 -12    6.80   34.50
 -15  -9  12  -38.80   52.99
  15   9 -12    6.50   31.80
 -13  -9  12  -87.49   55.29
  13   9 -12   -6.90   29.70
 -11  -9  12  -17.40   56.39
  11   9 -12  -10.90   27.80
  -9  -9  12  -53.79   56.79
   9   9 -12   30.30   28.60
  -7  -9  12  -47.40   57.39
   7   9 -12   -6.20   23.90
  -7   9  12  -15.70   38.60
  -5  -9  12  -87.89   58.09
  -5   9  12  -54.59   39.40
   5   9 -12   13.40   24.20
  -3  -9  12  -76.29   60.19
   3   9 -12    3.10   23.70
  -3   9  12  -19.20   41.20
  -1  -9  12  -27.20   66.49
  -1   9  12  -19.10   43.70
   1   9 -12   -7.70   23.20
   1  -9  12   -0.70   68.39
  -1   9 -12    7.00   24.60
   1   9  12   44.00   47.40
   3  -9  12  -53.59   68.39
  -3   9 -12  -20.40   25.30
   3   9  12  -30.10   49.50
   5  -9  12 -108.89   69.79
  -5   9 -12   38.60   30.50
   5   9  12  -38.10   47.40
   7  -9  12  -34.70   75.29
  -7   9 -12  -33.30   25.50
   7   9  12   -0.80   49.90
   9  -9  12   83.69   76.49
  -9   9 -12   13.60   29.00
   9   9  12  -56.09   50.89
 -20 -10  12 -111.39   58.19
  20  10 -12  -88.39   38.90
 -18 -10  12  -41.90   62.49
  18  10 -12  -46.70   39.80
 -16 -10  12  -71.19   61.69
  16  10 -12  -15.80   38.30
 -14 -10  12    8.60   63.19
  14  10 -12  -19.90   33.50
 -12 -10  12   -0.60   59.69
  12  10 -12   99.79   38.00
 -10 -10  12  -48.70   58.69
  10  10 -12   47.40   30.70
  -8 -10  12  -44.40   59.69
   8  10 -12  -30.10   26.00
  -6 -10  12  -22.50   62.89
  -6  10  12   32.20   42.90
   6  10 -12    1.10   26.20
  -4 -10  12  -87.59   68.39
   4  10 -12   17.10   27.70
  -4  10  12   22.90   45.10
  -2 -10  12  -50.59   69.29
   2  10 -12   45.60   30.10
  -2  10  12   95.59   48.70
   0 -10  12  -14.20   73.79
   0  10 -12   11.70   27.30
   0  10  12  -14.80   47.70
   2 -10  12    9.70   75.49
   2  10  12  -36.20   49.70
  -2  10 -12   -9.20   24.70
   4 -10  12   -2.40   75.49
   4  10  12  -38.10   49.00
  -4  10 -12    3.40   28.20
   6 -10  12    9.80   79.79
  -6  10 -12   41.10   33.50
   6  10  12  -29.70   53.79
 -17 -11  12 -103.29   65.59
  17  11 -12  -57.79   40.00
 -15 -11  12  -23.20   66.79
  15  11 -12   28.00   41.30
 -13 -11  12  -70.99   65.09
  13  11 -12  -25.00   34.70
 -11 -11  12  -64.69   62.99
  11  11 -12   12.40   34.10
  -9 -11  12 -113.39   64.39
   9  11 -12   16.90   31.50
  -7 -11  12 -111.29   65.29
   7  11 -12  -35.30   27.40
  -5 -11  12  -80.69   68.79
   5  11 -12  -35.50   25.80
  -5  11  12  -73.69   42.00
  -3 -11  12  -93.79   71.89
   3  11 -12   18.00   28.90
  -3  11  12  -37.20   45.70
  -1 -11  12 -163.18   73.29
   1  11 -12   42.50   32.10
  -1  11  12  -20.00   49.60
   1 -11  12  -95.89   76.19
  -1  11 -12  -25.30   25.90
   1  11  12  -32.70   50.99
   3 -11  12 -109.49   75.49
  -3  11 -12  -15.80   25.60
   3  11  12  -57.59   52.49
 -12 -12  12 -114.29   65.69
  12  12 -12  -58.39   35.10
 -10 -12  12  -89.89   66.89
  10  12 -12  -27.30   33.40
  -8 -12  12 -107.29   67.79
   8  12 -12   -2.00   35.10
  -6 -12  12 -121.39   66.69
   6  12 -12   17.80   33.90
  -4 -12  12 -170.58   75.59
  -4  12  12  -91.19   44.20
   4  12 -12  -21.40   26.50
  -2 -12  12  -87.49   77.09
  -2  12  12  -98.49   46.40
   2  12 -12  -10.20   28.40
   0 -12  12  -65.79   80.49
   0  12  12  -60.69   51.69
   0  12 -12   13.60   32.60
 -28   0  13  -45.00   42.10
 -26   0  13  -10.30   44.00
 -24   0  13   -7.30   42.80
 -22   0  13   47.10   42.70
 -20   0  13   -1.90   38.70
 -18   0  13   -3.90   36.30
 -16   0  13  -27.40   28.80
  14   0 -13   -9.40   17.10
 -14   0  13   19.80   30.70
 -12   0  13  -11.00   26.40
  12   0 -13    4.30   18.60
 -12   0  13    0.90   23.00
  10   0 -13  -13.00   17.40
 -10   0  13    9.60   27.10
 -10   0  13    4.30   23.80
  -8   0  13   31.10   25.50
   8   0 -13   -3.10   15.90
  -8   0  13   21.50   24.10
  -6   0  13   20.00   24.60
   6   0 -13   13.70   17.60
  -6   0  13   10.40   22.00
   4   0 -13   14.30   16.30
  -4   0  13   23.10   21.70
  -2   0  13  -10.70   18.70
   2   0 -13   -0.80   14.80
   0   0 -13  -11.70   15.70
   0   0  13  -10.40   20.30
  -2   0 -13  -11.70   18.50
   2   0  13   10.30   23.90
  -4   0 -13   30.50   21.00
   4   0  13   18.60   27.70
  -6   0 -13  -11.20   19.90
   6   0  13   -3.30   30.10
   8   0  13   36.90   37.20
  -8   0 -13    7.00   24.80
 -10   0 -13  -14.50   25.70
  10   0  13   69.29   43.80
  12   0  13   65.39   47.10
 -12   0 -13  -13.90   30.50
  14   0  13  118.09   51.09
 -14   0 -13    1.60   37.80
 -27  -1  13  -13.30   48.00
 -27   1  13   12.20   42.00
 -25  -1  13   16.20   46.80
 -25   1  13   13.60   47.70
 -23  -1  13   54.29   46.00
 -23   1  13  -33.20   39.10
 -21  -1  13   42.50   42.10
 -21   1  13   62.79   44.40
 -19  -1  13  143.29   45.10
 -19   1  13  260.57   53.59
 -17  -1  13  442.56   61.79
 -17   1  13  400.16   56.89
 -15  -1  13  320.47   52.99
  15   1 -13  347.67   38.40
 -15   1  13  299.27   49.90
 -13  -1  13   30.90   34.40
  13  -1 -13   34.20   20.10
  13   1 -13   30.70   20.70
 -13   1  13   46.80   26.00
 -13   1  13   22.40   28.30
  11  -1 -13    4.10   18.90
 -11  -1  13   39.40   31.50
 -11   1  13   21.10   24.90
 -11   1  13   29.50   27.10
  11   1 -13   15.90   19.50
   9  -1 -13  164.08   28.50
  -9  -1  13  171.78   37.00
  -9   1  13  152.28   32.40
   9   1 -13  148.09   26.80
  -9   1  13  185.38   33.10
   7  -1 -13   98.89   24.70
  -7  -1  13   99.29   32.50
   7   1 -13   76.99   22.60
  -7   1  13   64.79   27.00
  -5  -1  13  355.86   40.60
  -5  -1  13  403.06   49.30
   5  -1 -13  343.07   39.00
  -5   1  13  303.37   38.60
   5   1 -13  257.47   32.40
   3  -1 -13    5.60   16.60
  -3  -1  13   17.50   29.10
  -3  -1  13   17.20   21.00
   3   1 -13  -12.80   14.30
  -3   1  13   16.50   22.70
   1  -1 -13   13.30   19.70
  -1  -1  13    9.40   20.40
   1   1 -13   -1.00   16.40
  -1   1  13  -14.60   22.20
  -1  -1 -13  130.49   29.20
   1  -1  13  126.79   29.10
   1   1  13  147.39   33.60
  -1   1 -13  103.99   25.30
  -3  -1 -13  163.58   32.90
   3  -1  13  165.48   36.70
   3   1  13  188.18   37.40
  -3   1 -13  158.08   31.80
  -5  -1 -13  162.08   33.20
   5  -1  13  274.97   45.60
   5   1  13  194.28   41.10
  -5   1 -13  228.48   35.70
   7  -1  13  146.19   43.40
  -7  -1 -13   41.00   26.90
   7   1  13  108.59   38.00
  -7   1 -13   82.39   28.00
   9  -1  13   83.69   43.20
  -9  -1 -13   60.59   28.90
   9   1  13   11.30   39.50
  -9   1 -13   29.20   30.50
  11  -1  13   52.19   44.60
 -11  -1 -13   -6.40   29.30
  11   1  13   74.69   45.80
 -11   1 -13    9.80   29.50
  13  -1  13  148.99   51.39
  13   1  13   94.09   47.80
 -13   1 -13   38.00   35.30
 -28  -2  13   19.30   51.89
 -28   2  13    1.60   45.30
 -26  -2  13   36.90   49.30
 -26   2  13  -17.90   42.30
 -24  -2  13  -12.30   46.00
 -24   2  13   -1.90   38.20
 -22  -2  13   -6.10   40.50
 -22   2  13   84.39   40.90
 -20  -2  13  141.49   50.09
 -20   2  13  224.08   52.79
 -18  -2  13  457.95   64.89
 -18   2  13  475.85   63.89
 -16  -2  13  776.22   74.89
  16   2 -13  718.33   47.20
 -16   2  13  770.62   66.69
 -14  -2  13  220.58   49.00
  14   2 -13  171.48   29.10
 -14   2  13  174.48   40.20
 -12  -2  13   66.29   38.40
  12  -2 -13   73.69   24.20
 -12   2  13   89.89   29.90
 -12   2  13   56.89   31.80
  12   2 -13   51.29   22.80
  10  -2 -13   83.79   24.50
 -10  -2  13  105.59   37.50
 -10   2  13   86.19   30.80
 -10   2  13   66.59   28.20
  10   2 -13   77.39   22.90
   8  -2 -13  158.68   29.90
  -8  -2  13  150.28   40.10
   8   2 -13  128.49   27.00
  -8   2  13  183.38   36.10
   6  -2 -13  231.08   32.60
  -6  -2  13  335.27   47.40
  -6   2  13  247.18   38.70
   6   2 -13  212.48   30.20
  -4  -2  13  170.68   39.00
   4  -2 -13  146.89   30.40
  -4   2  13  163.18   35.70
   4   2 -13  186.78   29.40
  -2  -2  13  -14.40   33.40
   2  -2 -13   -9.10   19.20
  -2  -2  13    2.60   22.30
  -2   2  13  -29.70   23.50
   2   2 -13  -20.10   16.10
   0  -2  13  166.18   46.20
   0  -2 -13  109.99   28.40
   0  -2  13  139.19   30.60
   0   2  13  192.18   37.10
   0   2 -13  120.59   26.40
   2  -2  13  607.94   56.49
  -2  -2 -13  621.54   51.79
  -2   2 -13  599.24   49.00
   2   2  13  681.43   58.99
   4  -2  13  260.37   42.40
  -4  -2 -13  192.98   34.70
   4   2  13  215.78   41.00
  -4   2 -13  176.28   31.60
   6  -2  13  196.38   43.50
  -6  -2 -13  186.68   37.80
   6   2  13  177.68   43.40
  -6   2 -13  193.98   36.20
  -8  -2 -13  134.09   37.00
   8  -2  13  298.67   56.19
  -8   2 -13  175.48   38.50
   8   2  13  233.28   49.80
 -10  -2 -13  -28.10   26.00
  10  -2  13   20.00   42.40
 -10   2 -13   21.10   29.30
  10   2  13   47.60   41.40
  12  -2  13   36.40   43.90
 -12   2 -13   43.70   32.60
  12   2  13   58.19   47.10
  14  -2  13   87.09   50.19
  14   2  13   59.59   48.40
 -14   2 -13   31.90   36.80
 -27  -3  13    2.90   51.79
 -27   3  13   24.40   45.30
 -25  -3  13    1.60   47.10
 -25   3  13    4.60   38.60
 -23  -3  13   36.40   49.80
 -23   3  13   57.29   41.70
 -21  -3  13  -33.80   44.30
 -21   3  13  -39.20   36.10
 -19  -3  13   41.50   48.10
 -19   3  13   75.09   38.00
 -17  -3  13  248.58   56.79
 -17   3  13  307.17   51.19
  17   3 -13  279.37   33.50
 -15  -3  13  102.49   47.10
 -15   3  13  105.19   37.30
  15   3 -13  101.79   26.10
 -13  -3  13  135.59   47.20
  13  -3 -13   94.69   35.10
  13   3 -13   84.69   24.40
 -13   3  13  117.79   35.60
  11  -3 -13   25.60   23.60
 -11  -3  13   37.10   39.70
  11   3 -13   46.70   23.10
 -11   3  13   12.00   25.60
 -11   3  13    5.40   27.90
  -9  -3  13   53.49   39.10
   9  -3 -13   42.20   24.80
  -9   3  13   10.40   29.60
   9   3 -13   66.79   22.50
  -7  -3  13   45.20   38.60
   7  -3 -13    4.90   22.50
  -7   3  13   32.60   31.00
   7   3 -13   41.00   20.30
  -5  -3  13   61.09   39.10
   5  -3 -13   15.30   22.50
  -5   3  13   17.80   29.50
   5   3 -13    7.60   16.50
   3  -3 -13   72.19   26.20
  -3  -3  13   32.00   41.50
  -3   3  13   32.60   31.40
   3   3 -13   77.59   23.30
  -1  -3  13   47.60   44.10
   1  -3 -13  -22.90   19.00
  -1   3  13   58.99   34.10
   1   3 -13   12.30   17.90
   1  -3  13  794.62   76.39
  -1  -3 -13  791.72   57.79
   1  -3  13  740.43   57.79
   1   3  13  774.22   64.79
  -1   3 -13  802.12   53.79
  -3  -3 -13   56.99   26.80
   3  -3  13   64.69   30.70
   3  -3  13   23.40   43.80
   3   3  13   67.99   34.00
  -3   3 -13   71.09   25.30
  -5  -3 -13  105.09   31.50
   5  -3  13  179.88   41.50
  -5   3 -13   90.69   28.20
   5   3  13  209.58   44.30
   7  -3  13   66.69   39.80
  -7   3 -13  123.69   34.10
   7   3  13   98.59   39.50
   9  -3  13   59.09   43.70
   9   3  13   39.90   40.80
  -9   3 -13   49.70   29.50
  11  -3  13   40.30   44.80
 -11   3 -13   15.50   30.50
  11   3  13  -53.69   40.90
  13  -3  13   57.09   47.20
  13   3  13   35.70   48.30
 -13   3 -13   24.00   33.40
 -26  -4  13   32.80   53.59
 -26   4  13   29.80   46.70
 -24  -4  13   19.40   54.19
 -24   4  13   -3.50   39.40
 -22  -4  13  138.99   57.89
 -22   4  13  100.29   46.60
 -20  -4  13   -4.20   44.60
 -20   4  13   43.50   41.50
 -18  -4  13  -38.20   40.60
 -18   4  13   30.10   36.30
  18   4 -13   15.70   22.50
 -16  -4  13    2.30   44.20
 -16   4  13   53.09   36.30
  16   4 -13   16.70   22.20
 -14  -4  13   53.39   44.20
 -14   4  13   22.40   31.60
  14   4 -13   46.60   23.40
 -12  -4  13   89.19   48.80
  12   4 -13   35.90   23.50
 -12   4  13   68.99   32.00
  10  -4 -13  303.77   38.00
 -10  -4  13  364.86   59.89
 -10   4  13  374.36   43.30
  10   4 -13  368.36   40.20
  -8  -4  13  553.24   73.49
   8  -4 -13  601.94   52.59
  -8   4  13  508.25   56.99
   8   4 -13  540.15   43.80
  -6  -4  13  308.57   55.09
   6  -4 -13  222.68   36.70
  -6   4  13  247.38   43.40
   6   4 -13  338.97   38.70
   4  -4 -13  522.95   51.39
  -4  -4  13  524.45   64.09
  -4   4  13  566.74   57.19
   4   4 -13  467.95   43.80
  -2  -4  13   17.60   48.20
   2  -4 -13  -12.70   22.60
  -2   4  13  -34.10   32.10
   2   4 -13   16.20   19.60
   0  -4  13    0.50   47.60
   0  -4 -13   18.60   20.80
   0   4  13   33.60   35.90
   0   4 -13   39.70   22.60
   2  -4  13   -4.40   43.90
   2   4  13   29.30   33.40
  -2   4 -13   -8.70   19.50
   4  -4  13   52.09   47.20
   4  -4  13   63.49   36.30
  -4   4 -13   85.79   30.30
   4   4  13  102.79   37.50
   6  -4  13  -62.69   32.30
  -6   4 -13  -18.30   24.90
   6   4  13   38.30   35.50
   8  -4  13  -33.50   38.10
  -8   4 -13  -17.00   23.20
   8   4  13   39.40   41.60
  10  -4  13   49.50   44.90
  10   4  13    7.30   42.80
 -10   4 -13    6.20   28.10
  12  -4  13   87.49   47.00
 -12   4 -13   49.99   34.10
  12   4  13   71.99   47.90
 -25  -5  13   -5.60   52.29
 -25   5  13   62.29   51.59
 -23  -5  13  -27.80   52.09
 -23   5  13   22.40   42.70
 -21  -5  13   -8.80   51.29
 -21   5  13  -20.20   40.50
 -19  -5  13   16.60   48.30
  19   5 -13   23.20   27.60
 -19   5  13   69.09   44.00
 -17  -5  13  125.79   52.79
 -17   5  13  119.39   43.20
  17   5 -13  137.99   29.40
 -15  -5  13  -20.00   43.10
 -15   5  13  -38.70   31.10
  15   5 -13  -27.50   20.30
 -13  -5  13    3.20   46.70
 -13   5  13    0.10   30.90
  13   5 -13   26.60   23.60
 -11  -5  13  288.07   59.59
 -11   5  13  246.38   41.40
  11   5 -13  234.18   35.10
  -9  -5  13  812.12   84.79
   9   5 -13  701.53   48.90
  -9   5  13  752.02   59.29
  -7  -5  13 1122.19   90.09
   7   5 -13  980.80   54.29
  -7   5  13 1036.50   67.29
  -5  -5  13  639.44   83.39
   5   5 -13  590.74   47.80
  -5   5  13  659.63   64.49
  -3  -5  13  432.96   68.89
  -3   5  13  404.96   54.29
   3   5 -13  412.86   43.30
  -1  -5  13  -26.40   51.29
   1   5 -13  -18.80   19.30
  -1   5  13  -14.20   35.80
   1  -5  13   25.70   50.89
   1   5  13    4.60   34.30
  -1   5 -13   -9.70   20.40
   3  -5  13   -3.40   48.20
  -3   5 -13  -23.70   23.10
   3   5  13  -14.20   33.60
   5  -5  13  -20.90   49.50
   5  -5  13  -39.40   34.00
   5   5  13    6.90   36.30
  -5   5 -13  -42.80   24.40
   7  -5  13   25.70   39.30
   7  -5  13   40.10   65.89
  -7   5 -13  -32.00   26.50
   7   5  13   37.00   41.80
   9  -5  13   62.19   43.30
  -9   5 -13   39.60   30.20
   9   5  13   38.40   45.70
  11  -5  13  113.49   49.20
 -11   5 -13   49.20   33.60
  11   5  13  106.09   50.79
 -24  -6  13  -14.40   53.69
 -24   6  13   23.40   50.39
 -22  -6  13  -59.69   49.70
 -22   6  13   83.49   51.49
 -20  -6  13  -28.90   48.20
 -20   6  13  -17.80   43.80
 -18  -6  13  -23.30   48.60
  18   6 -13  -14.80   25.20
 -18   6  13   17.80   40.40
 -16  -6  13   55.19   50.99
  16   6 -13   11.00   25.90
 -16   6  13   22.90   39.60
 -14  -6  13  -58.19   44.20
  14   6 -13    4.60   22.70
 -12  -6  13   44.80   49.30
  12   6 -13   64.69   24.70
 -10  -6  13  153.68   56.99
  10   6 -13  183.68   32.40
 -10   6  13  185.48   38.20
  -8  -6  13  529.95   72.19
   8   6 -13  610.24   49.10
  -8   6  13  612.54   59.49
  -6  -6  13  321.07   64.49
   6   6 -13  483.75   45.10
  -6   6  13  432.06   50.69
  -4  -6  13  248.18   63.59
   4   6 -13  190.58   32.10
  -4   6  13  360.76   51.79
  -2  -6  13  125.79   58.69
   2   6 -13   93.69   27.00
  -2   6  13  159.48   45.50
   0  -6  13    2.00   53.29
   0   6  13  -34.20   36.00
   0   6 -13   25.30   24.10
   2  -6  13  -54.29   53.09
  -2   6 -13  -15.40   21.40
   2   6  13   21.10   40.20
   4  -6  13  -48.60   52.99
   4   6  13   -3.70   37.90
  -4   6 -13   -0.80   23.80
   6  -6  13   16.50   59.19
  -6   6 -13  -54.59   23.60
   6   6  13   35.00   42.50
   8  -6  13   36.60   42.80
   8  -6  13   39.10   59.79
  -8   6 -13    5.50   28.50
   8   6  13   21.70   44.20
  10  -6  13   82.99   47.60
 -10   6 -13   18.50   32.00
  10   6  13   69.09   48.10
 -23  -7  13  -82.59   54.39
 -23   7  13   79.49   57.49
 -21  -7  13  -21.60   53.19
 -21   7  13   75.89   55.69
 -19  -7  13  -55.19   49.20
 -19   7  13   25.60   46.30
  19   7 -13  -13.30   27.50
 -17  -7  13  -51.29   49.10
 -17   7  13    4.30   42.20
  17   7 -13   25.00   29.00
 -15  -7  13  -20.30   49.40
  15   7 -13   -2.10   27.40
 -13  -7  13  -37.00   48.80
  13   7 -13   39.60   25.80
 -11  -7  13   41.70   54.19
  11   7 -13   65.89   26.70
  -9  -7  13  -30.60   52.89
  -9   7  13   40.30   34.90
   9   7 -13    0.30   23.40
  -7  -7  13  -40.00   53.19
  -7   7  13    4.50   35.50
   7   7 -13   28.80   26.00
  -5  -7  13   45.80   57.19
   5   7 -13    9.40   22.80
  -5   7  13   55.29   39.00
  -3  -7  13  -14.90   57.09
  -3   7  13   37.50   41.40
   3   7 -13   19.20   21.70
  -1  -7  13  -50.99   57.79
   1   7 -13   -9.30   21.40
  -1   7  13   50.89   41.50
   1  -7  13  -60.19   58.89
  -1   7 -13   32.20   26.30
   1   7  13   23.80   42.10
   3  -7  13   69.99   63.89
   3   7  13   46.20   45.50
  -3   7 -13   -9.80   23.70
   5  -7  13   99.69   67.69
  -5   7 -13   44.60   29.10
   5   7  13   91.59   47.80
   7  -7  13  -26.60   63.49
   7   7  13   25.70   47.20
  -7   7 -13   14.90   29.30
   9  -7  13   48.40   47.20
   9  -7  13   83.59   70.29
   9   7  13   30.80   49.50
  -9   7 -13   13.60   30.40
 -22  -8  13  -21.40   59.89
 -22   8  13   90.19   57.59
 -20  -8  13  -98.79   52.89
 -20   8  13   26.10   48.30
  20   8 -13  -25.40   30.70
 -18  -8  13   38.50   58.19
  18   8 -13   97.29   36.20
 -16  -8  13  -31.30   55.69
  16   8 -13   23.00   32.00
 -14  -8  13   36.80   58.49
  14   8 -13   39.30   31.50
 -12  -8  13  -73.19   52.39
  12   8 -13  -23.00   25.80
 -10  -8  13  -46.50   54.99
  10   8 -13   29.40   25.30
  -8  -8  13  -67.79   58.69
  -8   8  13  -12.80   36.70
   8   8 -13   25.40   26.00
  -6  -8  13   29.10   59.39
   6   8 -13   61.39   27.50
  -6   8  13  126.59   43.40
  -4  -8  13  -46.70   62.29
  -4   8  13   19.80   42.90
   4   8 -13    7.10   23.70
  -2  -8  13   49.40   63.49
   2   8 -13    3.10   21.40
  -2   8  13  -23.90   44.50
   0  -8  13  -56.19   63.49
   0   8  13    4.30   46.00
   0   8 -13   38.90   27.20
   2  -8  13  189.58   75.59
   2   8  13  146.19   53.29
  -2   8 -13  116.79   33.80
   4  -8  13   52.09   72.59
  -4   8 -13  107.69   34.90
   4   8  13   71.09   49.70
   6  -8  13   33.90   77.89
  -6   8 -13   48.60   31.60
   6   8  13   73.19   53.79
   8  -8  13   65.49   76.59
   8   8  13   23.40   50.99
  -8   8 -13  -28.30   30.10
 -21  -9  13  -47.00   61.39
  21   9 -13   -3.70   38.90
 -19  -9  13    1.90   62.69
  19   9 -13    8.80   37.10
 -17  -9  13   28.40   64.99
  17   9 -13   93.09   38.10
 -15  -9  13  -21.80   57.49
  15   9 -13   26.90   33.30
 -13  -9  13  -49.60   59.89
  13   9 -13   17.60   31.60
 -11  -9  13  -14.60   60.19
  11   9 -13   34.70   30.30
  -9  -9  13 -112.29   57.09
   9   9 -13   17.00   26.70
  -7  -9  13  -13.20   60.99
  -7   9  13   65.39   42.30
   7   9 -13   55.99   30.20
  -5  -9  13  -49.70   63.69
   5   9 -13   45.00   27.90
  -5   9  13   55.99   42.60
  -3  -9  13   -3.50   67.59
   3   9 -13   12.00   24.10
  -3   9  13   -5.40   45.00
  -1  -9  13  -69.89   66.89
   1   9 -13  -13.00   24.40
  -1   9  13  -42.90   44.90
   1  -9  13    0.90   72.39
  -1   9 -13   57.09   32.50
   1   9  13   83.59   51.09
   3  -9  13   76.09   76.49
  -3   9 -13   67.69   30.50
   3   9  13   85.19   51.39
   5  -9  13  -45.00   74.49
  -5   9 -13   19.50   29.40
   5   9  13   76.49   55.29
   7  -9  13 -127.99   76.39
   7   9  13  -43.90   49.60
  -7   9 -13   -2.10   29.40
 -18 -10  13  -92.69   63.99
  18  10 -13  -60.29   34.40
 -16 -10  13  -51.09   59.49
  16  10 -13   24.50   37.00
 -14 -10  13 -126.09   58.19
  14  10 -13  -15.50   33.70
 -12 -10  13  -58.19   61.99
  12  10 -13   -5.10   31.70
 -10 -10  13  -12.10   63.79
  10  10 -13   -4.70   31.10
  -8 -10  13 -154.68   62.79
   8  10 -13   -4.00   27.70
  -6 -10  13  -95.89   62.59
  -6  10  13  -34.80   41.10
   6  10 -13   16.40   29.10
  -4 -10  13  -32.00   71.39
   4  10 -13   20.30   29.50
  -4  10  13  -83.89   42.90
  -2 -10  13   -2.20   72.19
  -2  10  13  -40.80   48.70
   2  10 -13  -10.70   24.50
   0 -10  13    2.90   76.09
   0  10 -13  -14.40   24.10
   0  10  13  -83.39   46.70
   2 -10  13  -63.89   74.69
  -2  10 -13   -1.20   27.20
   2  10  13  -29.50   50.69
   4 -10  13  -77.69   76.79
   4  10  13   58.69   56.09
  -4  10 -13   -5.10   27.30
 -15 -11  13 -136.59   63.69
  15  11 -13  -28.80   37.00
 -13 -11  13 -124.29   64.99
  13  11 -13  -27.20   36.80
 -11 -11  13 -157.78   63.69
  11  11 -13  -41.00   31.70
  -9 -11  13  -72.89   69.39
   9  11 -13   34.90   34.90
  -7 -11  13 -102.29   68.09
   7  11 -13   29.50   30.90
  -5 -11  13  -90.99   69.29
  -5  11  13  -61.49   44.80
   5  11 -13   29.10   30.70
  -3  11  13  -26.20   49.30
   3  11 -13    9.10   30.40
  -1 -11  13 -113.29   75.69
   1  11 -13    1.00   26.90
  -1  11  13  -86.59   48.80
   1 -11  13  -76.19   81.39
   1  11  13    8.80   55.49
  -1  11 -13  -34.70   25.60
 -10 -12  13 -121.49   69.09
  10  12 -13  -49.40   35.50
   8  12 -13   11.60   35.60
   6  12 -13   32.10   32.10
  -4 -12  13  -47.90   80.99
  -4  12  13  -99.49   47.60
   4  12 -13   16.00   34.60
 -26   0  14   60.29   54.89
 -24   0  14   13.30   45.70
 -22   0  14   28.00   45.00
 -20   0  14   36.80   43.00
 -18   0  14   14.60   37.50
 -16   0  14  194.88   48.00
  14   0 -14  192.68   30.60
 -14   0  14  168.68   34.90
 -14   0  14  202.58   45.90
 -12   0  14  583.74   53.29
 -12   0  14  514.45   57.29
  12   0 -14  524.65   45.40
 -10   0  14 1167.38   66.99
 -10   0  14 1253.47   64.79
  10   0 -14 1225.58   58.79
  -8   0  14  236.48   39.10
   8   0 -14  218.28   33.80
  -8   0  14  282.07   40.00
  -6   0  14  416.76   45.90
  -6   0  14  388.06   44.40
   6   0 -14  299.67   37.30
   4   0 -14  159.68   29.90
  -4   0  14  152.58   34.00
   2   0 -14  134.49   28.60
  -2   0  14  113.09   31.90
   0   0 -14  103.19   28.90
   0   0  14  114.79   32.30
  -2   0 -14   12.50   19.70
   2   0  14    5.00   25.80
  -4   0 -14   -7.60   19.40
   4   0  14   -9.40   28.20
  -6   0 -14  101.69   32.00
   6   0  14  151.88   42.60
   8   0  14  405.96   60.59
  -8   0 -14  307.87   46.40
  10   0  14  412.46   62.99
 -10   0 -14  295.27   50.29
 -12   0 -14  170.48   45.60
  12   0  14  307.37   58.99
 -27  -1  14  -20.10   50.29
 -27   1  14  -19.40   41.30
 -25  -1  14   30.30   48.90
 -25   1  14   49.20   50.39
 -23  -1  14   16.80   44.00
 -23   1  14  -61.39   40.50
 -21  -1  14  -28.80   41.40
 -21   1  14  -12.70   40.70
 -19  -1  14   -2.00   40.00
 -19   1  14    1.90   36.50
 -17  -1  14  140.29   47.40
 -17   1  14   74.19   44.00
 -15  -1  14   55.39   39.00
  15   1 -14   43.40   23.40
 -15   1  14   14.50   33.90
  13  -1 -14  485.05   44.00
 -13  -1  14  460.75   58.99
  13   1 -14  431.66   43.60
 -13   1  14  377.06   42.30
 -13   1  14  479.55   54.69
 -11  -1  14  414.76   53.19
  11  -1 -14  376.86   42.90
 -11   1  14  400.66   48.90
 -11   1  14  347.07   41.70
  11   1 -14  258.47   35.30
  -9  -1  14  464.05   58.09
   9  -1 -14  502.75   47.50
  -9   1  14  514.35   48.60
  -9   1  14  563.54   54.39
   9   1 -14  508.75   44.70
  -7  -1  14  205.18   43.00
  -7  -1  14  196.68   35.90
   7  -1 -14  172.48   31.00
  -7   1  14  192.88   36.90
   7   1 -14  168.98   29.70
  -5  -1  14  152.38   38.40
   5  -1 -14  101.99   26.60
  -5  -1  14  111.89   31.10
  -5   1  14  133.49   34.40
   5   1 -14  112.59   25.50
  -3  -1  14   14.20   24.70
   3  -1 -14   14.40   21.10
  -3   1  14  -10.10   25.70
   3   1 -14   22.40   19.20
  -1  -1  14   33.80   26.40
   1  -1 -14   12.10   20.20
  -1   1  14   17.90   27.50
   1   1 -14   -7.60   17.00
  -1  -1 -14   17.30   21.00
   1  -1  14   21.60   25.30
   1   1  14   20.20   28.60
  -1   1 -14   32.30   21.10
  -3  -1 -14  -18.00   17.90
   3  -1  14    2.40   27.80
   3   1  14  -29.70   24.30
  -3   1 -14   -1.70   20.30
   5  -1  14   74.79   37.10
  -5  -1 -14   45.60   26.30
  -5   1 -14   13.40   23.40
   5   1  14   45.30   34.70
  -7  -1 -14  156.48   36.60
   7  -1  14  255.77   51.19
   7   1  14  295.37   53.49
  -7   1 -14  154.68   36.70
  -9  -1 -14  131.49   36.80
   9  -1  14  324.47   58.79
  -9   1 -14  145.59   40.10
   9   1  14  245.38   52.79
[truncated: 69,610 more chars]
